# Supplementary material
Source: publisher figshare collection journal article supplement (https://diabetesjournals.figshare.com/articles/dataset/_/24550435)
Supplement: Supplementary file 1 [file 1]

| Group    | EC types     | Odd ratio   | p-value    | adjusted p-value |
|----------|--------------|-------------|------------|------------------|
| Control  | Capillary EC | 1.644620911 | 3.0382E-16 | 6.07635E-16      |
| Control  | Venous EC    | 1.379276137 | 1.7187E-06 | 2.29162E-06      |
| Control  | Aterial EC   | 1.368186838 | 0.00933736 | 0.009337358      |
| Control  | EC-C4        | 0           | 1.2841E-86 | 5.13629E-86      |
| Diabetic | Capillary EC | 0.608042858 | 3.0382E-16 | 6.07635E-16      |
| Diabetic | Venous EC    | 0.725017981 | 1.7187E-06 | 2.29162E-06      |
| Diabetic | Aterial EC   | 0.730894328 | 0.00933736 | 0.009337358      |
| Diabetic | EC-C4        | Inf         | 1.2841E-86 | 5.13629E-86      |
