# Supplementary material
Source: publisher figshare collection journal article supplement (https://diabetesjournals.figshare.com/articles/dataset/_/24550435)
Supplement: Supplementary file 3 [file 1]

| Gene     | Log fold ch | p-value   | adjusted p-value |
|----------|-------------|-----------|------------------|
| Igfbp7   | 1.575663    | 2.02E-299 | 3.02E-295        |
| Ctla2a   | 2.554358    | 1.39E-256 | 1.04E-252        |
| Mgp      | 2.620874    | 2.70E-215 | 1.01E-211        |
| Slc2a1   | 1.206362    | 2.67E-232 | 1.33E-228        |
| Tmem252  | 2.832557    | 1.92E-181 | 4.10E-178        |
| Cd200    | 1.672667    | 1.71E-171 | 3.21E-168        |
| Ly6a     | 1.274136    | 9.38E-184 | 2.34E-180        |
| Pim3     | 2.255491    | 2.41E-143 | 3.61E-140        |
| Mal      | 1.845718    | 1.76E-142 | 2.39E-139        |
| Ucp2     | 2.128851    | 1.85E-130 | 2.13E-127        |
| Ly6c1    | 1.030471    | 1.56E-134 | 1.95E-131        |
| Fos      | 2.125714    | 9.36E-125 | 1.00E-121        |
| Acer2    | 1.779975    | 1.40E-114 | 1.16E-111        |
| Rps11    | 0.966105    | 2.56E-116 | 2.55E-113        |
| Lrg1     | 5.77876     | 2.03E-104 | 1.17E-101        |
| Id1      | 1.195839    | 1.81E-113 | 1.43E-110        |
| Ifitm3   | 1.089819    | 3.05E-113 | 2.28E-110        |
| Klf2     | 1.071792    | 5.80E-111 | 4.13E-108        |
| Rps16    | 0.896973    | 7.67E-111 | 5.22E-108        |
| Cebpd    | 2.128461    | 1.41E-102 | 7.81E-100        |
| Vwf      | 2.379774    | 2.91E-100 | 1.55E-97         |
| H2-K1    | 1.110946    | 4.12E-100 | 2.13E-97         |
| Ccn1     | 2.37678     | 9.13E-93  | 4.41E-90         |
| Fth1     | 1.286065    | 2.86E-92  | 1.34E-89         |
| Junb     | 1.550773    | 2.66E-94  | 1.33E-91         |
| H2-D1    | 0.959177    | 5.41E-90  | 2.32E-87         |
| Ifitm2   | 1.201461    | 3.64E-87  | 1.47E-84         |
| Tmem176b | 2.249853    | 1.85E-84  | 7.30E-82         |
| Tmem176c | 3.296391    | 1.49E-82  | 5.58E-80         |
| Ch25h    | 4.283824    | 6.92E-82  | 2.47E-79         |
| Bmpr2    | 0.960814    | 4.10E-88  | 1.71E-85         |
| Rpl18a   | 0.762774    | 6.90E-83  | 2.65E-80         |
| Rpl39    | 0.805798    | 5.71E-80  | 1.99E-77         |
| Slc3a2   | 0.972996    | 6.88E-78  | 2.34E-75         |
| Paqr5    | 1.154884    | 3.76E-77  | 1.25E-74         |
| Rpl10    | 0.86292     | 8.78E-76  | 2.86E-73         |
| Nfkbia   | 0.903859    | 5.20E-75  | 1.66E-72         |
| Tshz2    | 1.397505    | 5.95E-73  | 1.82E-70         |
| Jun      | 1.258264    | 5.01E-74  | 1.56E-71         |
| Fnbp1l   | 1.225884    | 9.27E-73  | 2.77E-70         |
| Cd59a    | 1.251378    | 4.47E-72  | 1.31E-69         |
| Galnt15  | 2.280795    | 4.13E-67  | 1.10E-64         |
| Fau      | 0.60406     | 3.20E-71  | 9.20E-69         |
| Ecscr    | 1.338235    | 3.24E-67  | 8.81E-65         |
| Ybx1     | 0.806337    | 3.55E-68  | 9.84E-66         |
| Hmgcs2   | 1.558926    | 1.40E-65  | 3.50E-63         |

|         |          |          |          |
|---------|----------|----------|----------|
| Fam110d | 1.303757 | 1.44E-65 | 3.54E-63 |
| Rpl23   | 0.699733 | 3.24E-66 | 8.52E-64 |
| Zfp36l2 | 1.479532 | 1.24E-63 | 2.81E-61 |
| Rpl17   | 0.701217 | 8.93E-66 | 2.31E-63 |
| Serinc3 | 0.689882 | 1.21E-65 | 3.06E-63 |
| Fas     | 1.402924 | 1.07E-63 | 2.47E-61 |
| Egr1    | 1.905757 | 1.34E-62 | 2.86E-60 |
| Eef1a1  | 0.603595 | 2.65E-65 | 6.39E-63 |
| Rpl41   | 0.575904 | 3.30E-65 | 7.84E-63 |
| Txnip   | 1.102576 | 7.89E-63 | 1.74E-60 |
| Rps28   | 0.820091 | 6.55E-63 | 1.46E-60 |
| Tgm2    | 1.43454  | 1.78E-59 | 3.60E-57 |
| Rack1   | 0.743194 | 7.70E-61 | 1.60E-58 |
| Zfp36   | 1.256525 | 3.15E-59 | 6.29E-57 |
| Klf4    | 0.960894 | 4.12E-59 | 8.13E-57 |
| Ier2    | 1.151559 | 4.19E-58 | 7.93E-56 |
| Jund    | 0.945354 | 1.66E-58 | 3.23E-56 |
| Rpl32   | 0.652515 | 5.60E-58 | 1.05E-55 |
| B2m     | 0.715623 | 2.54E-58 | 4.88E-56 |
| Id3     | 0.820913 | 1.76E-57 | 3.26E-55 |
| Capg    | 1.781147 | 1.50E-55 | 2.63E-53 |
| Rps20   | 0.669138 | 3.15E-57 | 5.75E-55 |
| Rps6    | 0.892907 | 3.48E-56 | 6.27E-54 |
| Rpl36   | 0.63034  | 9.10E-56 | 1.62E-53 |
| Rps8    | 0.558322 | 6.45E-55 | 1.12E-52 |
| Socs3   | 1.720228 | 6.87E-53 | 1.14E-50 |
| Cpe     | 1.151307 | 2.84E-53 | 4.77E-51 |
| Ly6e    | 0.569036 | 6.97E-55 | 1.20E-52 |
| Gadd45g | 1.935164 | 4.27E-51 | 6.52E-49 |
| Rps18   | 0.745935 | 2.26E-52 | 3.71E-50 |
| Hrct1   | 1.412488 | 2.71E-51 | 4.18E-49 |
| Gpr146  | 1.224474 | 2.22E-51 | 3.48E-49 |
| Cd9     | 1.358551 | 1.06E-50 | 1.58E-48 |
| Bvht    | 1.243585 | 9.53E-51 | 1.44E-48 |
| Rps27   | 0.554189 | 4.34E-52 | 7.07E-50 |
| Vwa1    | 0.805392 | 2.23E-51 | 3.48E-49 |
| Atp8b1  | 3.287266 | 2.50E-49 | 3.57E-47 |
| H3f3b   | 0.533332 | 2.05E-50 | 3.04E-48 |
| Rps15a  | 0.64416  | 3.79E-50 | 5.51E-48 |
| S100a11 | 0.982059 | 4.73E-49 | 6.62E-47 |
| Qsox1   | 1.7807   | 8.51E-48 | 1.16E-45 |
| Rpl19   | 0.573067 | 2.89E-49 | 4.08E-47 |
| Gpx1    | 1.014952 | 4.82E-48 | 6.62E-46 |
| Tpt1    | 0.471577 | 2.00E-49 | 2.88E-47 |
| Adgrg1  | 1.220118 | 9.50E-48 | 1.28E-45 |
| Litaf   | 2.315999 | 6.76E-47 | 8.72E-45 |
| Xdh     | 1.416622 | 4.17E-47 | 5.47E-45 |

|          |          |          |          |
|----------|----------|----------|----------|
| Ier5     | 1.185525 | 3.15E-47 | 4.17E-45 |
| Itm2c    | 1.227556 | 1.10E-46 | 1.39E-44 |
| Rplp0    | 0.864226 | 1.35E-46 | 1.68E-44 |
| Fxyd5    | 0.693792 | 6.95E-47 | 8.89E-45 |
| Scgb3a1  | 3.641551 | 6.35E-45 | 7.55E-43 |
| Rps4x    | 0.563075 | 6.41E-47 | 8.34E-45 |
| Xbp1     | 1.425899 | 1.65E-45 | 2.00E-43 |
| Rps14    | 0.474868 | 3.00E-47 | 4.02E-45 |
| Rpl3     | 0.678302 | 5.84E-46 | 7.16E-44 |
| Ubc      | 0.656978 | 9.06E-46 | 1.10E-43 |
| Ecm1     | 1.254502 | 1.03E-44 | 1.21E-42 |
| Lcn2     | 5.367746 | 1.27E-43 | 1.43E-41 |
| Angptl4  | 1.82876  | 3.33E-44 | 3.80E-42 |
| Gm10076  | 0.819776 | 5.00E-45 | 5.99E-43 |
| Gimap6   | 1.133518 | 2.27E-44 | 2.64E-42 |
| Zbtb16   | 3.093997 | 1.59E-43 | 1.78E-41 |
| Rps15    | 0.53553  | 1.04E-44 | 1.21E-42 |
| Rps5     | 0.569619 | 2.99E-44 | 3.45E-42 |
| Rpl34    | 0.590205 | 6.51E-44 | 7.39E-42 |
| Ier3     | 1.164815 | 5.09E-43 | 5.60E-41 |
| Rpl12    | 0.661842 | 6.69E-43 | 7.31E-41 |
| Rps12    | 0.530074 | 3.16E-43 | 3.50E-41 |
| Fkbp1a   | 0.890071 | 2.77E-42 | 2.97E-40 |
| Fkbp5    | 2.758914 | 1.94E-41 | 1.97E-39 |
| Tbc1d4   | 1.241005 | 5.33E-42 | 5.66E-40 |
| Apold1   | 1.222058 | 6.79E-42 | 7.16E-40 |
| Rpl37a   | 0.493198 | 1.42E-42 | 1.55E-40 |
| Gpcpd1   | 0.72836  | 1.23E-41 | 1.28E-39 |
| Rpl18    | 0.621171 | 1.29E-41 | 1.33E-39 |
| Emp1     | 1.591343 | 1.01E-40 | 9.93E-39 |
| Rpl36a   | 0.687116 | 3.30E-41 | 3.31E-39 |
| Rps23    | 0.529371 | 1.38E-41 | 1.41E-39 |
| Rpl35a   | 0.509997 | 1.07E-41 | 1.12E-39 |
| Rpl13    | 0.529282 | 3.82E-41 | 3.79E-39 |
| Rplp2    | 0.544954 | 4.61E-41 | 4.54E-39 |
| Rpl37    | 0.498687 | 3.36E-41 | 3.35E-39 |
| Tnfrsf1a | 1.487004 | 6.27E-40 | 6.02E-38 |
| Sult1a1  | 1.603637 | 6.46E-40 | 6.16E-38 |
| Lipa     | 1.171526 | 4.97E-40 | 4.80E-38 |
| Dusp2    | 3.035198 | 3.16E-39 | 2.94E-37 |
| Vcam1    | 2.614551 | 3.96E-39 | 3.57E-37 |
| Lrrc8c   | 0.966363 | 7.87E-40 | 7.41E-38 |
| Rpl22    | 0.566572 | 3.23E-40 | 3.14E-38 |
| Fosb     | 1.307785 | 3.71E-39 | 3.40E-37 |
| Rpl35    | 0.569359 | 7.25E-40 | 6.87E-38 |
| Rpl6     | 0.574105 | 1.30E-39 | 1.22E-37 |
| Abca1    | 2.57006  | 2.21E-38 | 1.98E-36 |

|           |          |          |          |
|-----------|----------|----------|----------|
| Rps7      | 0.614903 | 3.79E-39 | 3.44E-37 |
| Rpl7      | 0.586792 | 3.73E-39 | 3.40E-37 |
| Atf3      | 1.89857  | 9.62E-38 | 8.37E-36 |
| Srarp     | 1.051784 | 5.04E-38 | 4.47E-36 |
| Btg2      | 0.93946  | 3.88E-38 | 3.46E-36 |
| Il4ra     | 2.171115 | 1.76E-37 | 1.52E-35 |
| Fam107a   | 1.305917 | 1.42E-37 | 1.23E-35 |
| Serpinb6b | 2.106578 | 3.99E-37 | 3.41E-35 |
| Eng       | 0.669667 | 7.03E-38 | 6.19E-36 |
| Rps19     | 0.547123 | 8.26E-38 | 7.23E-36 |
| Rpl29     | 0.597275 | 5.74E-37 | 4.88E-35 |
| Igfbp3    | 1.505971 | 3.36E-36 | 2.79E-34 |
| Rpl28     | 0.515333 | 1.51E-36 | 1.27E-34 |
| Dusp1     | 0.887169 | 2.72E-36 | 2.28E-34 |
| Map3k6    | 2.184076 | 1.01E-35 | 8.30E-34 |
| Rpl9      | 0.436916 | 2.01E-36 | 1.69E-34 |
| Spry1     | 1.304979 | 1.94E-35 | 1.56E-33 |
| 2200002D  | 2.661936 | 4.77E-35 | 3.76E-33 |
| Epas1     | 0.468878 | 4.66E-36 | 3.85E-34 |
| Rps3      | 0.535548 | 1.12E-35 | 9.15E-34 |
| Eef1b2    | 0.705621 | 2.94E-35 | 2.34E-33 |
| Ahnak     | 0.576046 | 2.12E-35 | 1.70E-33 |
| Rps9      | 0.527009 | 1.81E-35 | 1.46E-33 |
| Rps29     | 0.430381 | 1.49E-35 | 1.21E-33 |
| Rps26     | 0.593738 | 3.04E-35 | 2.40E-33 |
| Plxna2    | 1.028079 | 8.15E-35 | 6.39E-33 |
| Nr4a1     | 1.461357 | 2.63E-34 | 2.03E-32 |
| Rpl14     | 0.565021 | 2.39E-34 | 1.86E-32 |
| Tacc1     | 0.778157 | 5.28E-34 | 4.05E-32 |
| Cpne8     | 1.34501  | 1.74E-33 | 1.32E-31 |
| Stat3     | 1.001751 | 2.01E-33 | 1.50E-31 |
| Podxl     | 0.629471 | 1.23E-33 | 9.34E-32 |
| Sgk1      | 0.927971 | 5.35E-33 | 3.93E-31 |
| Rps24     | 0.430862 | 2.01E-33 | 1.50E-31 |
| Rpl27     | 0.640534 | 3.65E-33 | 2.70E-31 |
| Cfh       | 1.194994 | 1.17E-32 | 8.49E-31 |
| Ramp2     | 0.568348 | 4.48E-33 | 3.31E-31 |
| Ptma      | 0.388679 | 7.96E-33 | 5.81E-31 |
| Rps13     | 0.520699 | 2.22E-32 | 1.60E-30 |
| Icam1     | 2.493537 | 1.59E-31 | 1.12E-29 |
| Gngt2     | 1.446136 | 9.03E-32 | 6.44E-30 |
| Rpl21     | 0.500262 | 3.17E-32 | 2.27E-30 |
| Rpl8      | 0.445917 | 1.22E-31 | 8.63E-30 |
| Bcl2l1    | 0.859764 | 4.28E-31 | 3.01E-29 |
| H2-Q7     | 1.700956 | 1.01E-30 | 7.04E-29 |
| Arid5b    | 0.789828 | 4.85E-31 | 3.40E-29 |
| Rpl26     | 0.430955 | 1.06E-30 | 7.32E-29 |

|           |          |          |          |
|-----------|----------|----------|----------|
| Sparc     | 0.423725 | 3.52E-30 | 2.43E-28 |
| Arpc1b    | 0.678555 | 7.12E-30 | 4.89E-28 |
| Plin2     | 1.126497 | 2.53E-29 | 1.71E-27 |
| Alas1     | 0.871796 | 2.38E-29 | 1.62E-27 |
| Igfbp4    | 2.451263 | 1.18E-28 | 7.72E-27 |
| Slc38a5   | 1.973531 | 1.27E-28 | 8.30E-27 |
| Actg1     | 0.509793 | 3.82E-29 | 2.58E-27 |
| Rpl4      | 0.551744 | 6.85E-29 | 4.56E-27 |
| Rpl11     | 0.439586 | 4.89E-29 | 3.27E-27 |
| Prnp      | 0.699606 | 9.00E-29 | 5.96E-27 |
| Tspo      | 0.653818 | 1.00E-28 | 6.63E-27 |
| Kbtbd11   | 0.876108 | 1.46E-28 | 9.45E-27 |
| Gm39822   | 3.340976 | 4.57E-28 | 2.88E-26 |
| Clic1     | 0.661763 | 1.92E-28 | 1.24E-26 |
| Rpl10a    | 0.605542 | 2.32E-28 | 1.49E-26 |
| Gnai2     | 0.449174 | 2.37E-28 | 1.51E-26 |
| Rps27a    | 0.420898 | 6.70E-28 | 4.20E-26 |
| Cdh13     | 1.772159 | 2.46E-27 | 1.52E-25 |
| Klf6      | 0.7542   | 2.22E-27 | 1.38E-25 |
| Serpina3n | 5.851294 | 6.82E-27 | 4.17E-25 |
| Cmip      | 1.317802 | 3.45E-27 | 2.13E-25 |
| Slco1a4   | 0.429256 | 1.41E-27 | 8.78E-26 |
| Sbno2     | 1.293996 | 6.82E-27 | 4.17E-25 |
| Dusp23    | 1.816495 | 1.85E-26 | 1.11E-24 |
| Tagln2    | 0.647454 | 1.04E-26 | 6.31E-25 |
| Tpm3-rs7  | 0.896122 | 1.33E-26 | 8.06E-25 |
| Hspb8     | 2.035417 | 3.36E-26 | 1.97E-24 |
| Rhob      | 0.576699 | 1.88E-26 | 1.12E-24 |
| Rpl7a     | 0.542352 | 1.97E-26 | 1.17E-24 |
| Gmpr      | 2.320256 | 6.42E-26 | 3.71E-24 |
| Snrk      | 0.621188 | 3.30E-26 | 1.95E-24 |
| Tceal9    | 0.81632  | 2.34E-25 | 1.33E-23 |
| Ttll7     | 0.97825  | 2.61E-25 | 1.47E-23 |
| Tmsb10    | 0.574234 | 2.23E-25 | 1.27E-23 |
| Gadd45b   | 1.45083  | 6.01E-25 | 3.36E-23 |
| Lipe      | 1.252969 | 6.83E-25 | 3.80E-23 |
| Cltb      | 0.749665 | 9.81E-25 | 5.44E-23 |
| Rps21     | 0.374878 | 5.49E-25 | 3.08E-23 |
| Pxn       | 0.991467 | 1.25E-24 | 6.84E-23 |
| S100a6    | 1.547182 | 2.37E-24 | 1.28E-22 |
| Rpsa      | 0.532557 | 1.79E-24 | 9.73E-23 |
| Rpl27a    | 0.451574 | 1.56E-24 | 8.54E-23 |
| 1810073O  | 3.103433 | 6.60E-24 | 3.47E-22 |
| Sdcbp     | 0.709157 | 3.54E-24 | 1.89E-22 |
| Rps2      | 0.574915 | 3.29E-24 | 1.76E-22 |
| Cd34      | 0.502757 | 3.17E-24 | 1.71E-22 |
| Slc39a1   | 1.191571 | 6.69E-24 | 3.50E-22 |

|           |          |          |          |
|-----------|----------|----------|----------|
| Sema7a    | 0.655422 | 6.48E-24 | 3.42E-22 |
| Rps25     | 0.425661 | 4.87E-24 | 2.58E-22 |
| S100a10   | 0.997476 | 1.18E-23 | 6.14E-22 |
| Lrrc8a    | 0.96451  | 1.29E-23 | 6.64E-22 |
| Hif1a     | 0.738739 | 1.27E-23 | 6.57E-22 |
| Ackr1     | 4.337975 | 3.60E-23 | 1.84E-21 |
| Arpc3     | 0.519563 | 1.90E-23 | 9.78E-22 |
| Cyyr1     | 0.560619 | 2.84E-23 | 1.45E-21 |
| Ctps      | 2.111262 | 7.11E-23 | 3.56E-21 |
| Cp        | 0.730161 | 4.76E-23 | 2.42E-21 |
| 2410006H  | 0.956864 | 5.60E-23 | 2.82E-21 |
| Adamts1   | 0.963648 | 8.56E-23 | 4.24E-21 |
| Ptgfrn    | 1.733974 | 1.13E-22 | 5.59E-21 |
| Il1r1     | 1.87368  | 1.39E-22 | 6.79E-21 |
| Rps3a1    | 0.393809 | 5.39E-23 | 2.73E-21 |
| Rab11a    | 0.592033 | 7.24E-23 | 3.61E-21 |
| Rpl31     | 0.491828 | 9.20E-23 | 4.55E-21 |
| Selenop   | 0.508355 | 1.18E-22 | 5.79E-21 |
| Nek7      | 0.804121 | 2.09E-22 | 1.02E-20 |
| Tnfrsf9   | 3.767273 | 5.73E-22 | 2.76E-20 |
| Rai14     | 0.934508 | 5.59E-22 | 2.70E-20 |
| Ctsd      | 0.806135 | 5.28E-22 | 2.56E-20 |
| Tspan4    | 1.020174 | 6.27E-22 | 3.01E-20 |
| Uba52     | 0.572646 | 4.91E-22 | 2.39E-20 |
| Adamts9   | 2.294119 | 1.03E-21 | 4.92E-20 |
| Anxa2     | 0.613586 | 1.27E-21 | 6.04E-20 |
| Shroom2   | 1.41938  | 1.91E-21 | 9.04E-20 |
| Ccdc85a   | 1.285502 | 2.25E-21 | 1.06E-19 |
| Gpr160    | 1.463148 | 6.69E-21 | 3.11E-19 |
| Clec2d    | 0.517334 | 4.66E-21 | 2.18E-19 |
| Rpl30     | 0.393399 | 4.96E-21 | 2.31E-19 |
| Tcim      | 1.409225 | 1.01E-20 | 4.63E-19 |
| Tgfbr2    | 0.555323 | 7.44E-21 | 3.45E-19 |
| Krtcap2   | 0.598004 | 9.40E-21 | 4.33E-19 |
| Btf3      | 0.456315 | 9.07E-21 | 4.19E-19 |
| Serpina3g | 4.470401 | 2.43E-20 | 1.09E-18 |
| Timp3     | 0.617819 | 1.36E-20 | 6.20E-19 |
| Irf2bp2   | 0.628585 | 1.43E-20 | 6.51E-19 |
| Csrnp1    | 1.540217 | 2.17E-20 | 9.77E-19 |
| Rpl38     | 0.349974 | 1.18E-20 | 5.38E-19 |
| Vim       | 0.479876 | 1.49E-20 | 6.76E-19 |
| Ptgs2     | 4.903683 | 3.97E-20 | 1.77E-18 |
| Synpo     | 1.887387 | 5.27E-20 | 2.31E-18 |
| Pmaip1    | 1.004056 | 4.35E-20 | 1.93E-18 |
| Ifitm1    | 1.395918 | 6.23E-20 | 2.72E-18 |
| Pkp4      | 0.662828 | 4.17E-20 | 1.85E-18 |
| Cavin3    | 0.712601 | 4.61E-20 | 2.04E-18 |

|            |          |          |          |
|------------|----------|----------|----------|
| Lgmn       | 1.188173 | 5.63E-20 | 2.47E-18 |
| Mcf2l      | 0.662993 | 4.93E-20 | 2.17E-18 |
| Ccn2       | 1.293147 | 8.55E-20 | 3.66E-18 |
| S100a1     | 0.770898 | 6.39E-20 | 2.77E-18 |
| Aqp11      | 0.777748 | 6.91E-20 | 2.99E-18 |
| Nsa2       | 0.768365 | 9.09E-20 | 3.88E-18 |
| Msn        | 0.484455 | 7.81E-20 | 3.36E-18 |
| Crip1      | 0.547436 | 8.55E-20 | 3.66E-18 |
| Mmrn2      | 0.673799 | 1.21E-19 | 5.14E-18 |
| Heg1       | 0.565017 | 1.18E-19 | 4.99E-18 |
| Sox18      | 0.660518 | 1.56E-19 | 6.56E-18 |
| Pttg1ip    | 0.636871 | 1.60E-19 | 6.71E-18 |
| Atp1b3     | 0.642524 | 2.38E-19 | 9.93E-18 |
| Rras       | 0.551139 | 2.54E-19 | 1.05E-17 |
| Clic4      | 0.425039 | 2.92E-19 | 1.21E-17 |
| Srgn       | 0.469826 | 3.05E-19 | 1.26E-17 |
| Hspb1      | 0.531936 | 3.42E-19 | 1.40E-17 |
| Rps17      | 0.371126 | 3.09E-19 | 1.27E-17 |
| Cd93       | 0.521296 | 3.59E-19 | 1.46E-17 |
| Lims2      | 0.749724 | 5.34E-19 | 2.17E-17 |
| Arl15      | 0.797403 | 6.34E-19 | 2.57E-17 |
| Fosl2      | 1.105548 | 7.49E-19 | 3.02E-17 |
| Acacb      | 1.27837  | 8.25E-19 | 3.32E-17 |
| Itm2b      | 0.29409  | 6.42E-19 | 2.60E-17 |
| Rpl23a     | 0.452457 | 8.60E-19 | 3.44E-17 |
| Olfr1372-p | 0.91582  | 1.10E-18 | 4.40E-17 |
| Sh3bp5     | 0.975594 | 1.20E-18 | 4.74E-17 |
| Sik1       | 0.903265 | 1.38E-18 | 5.40E-17 |
| Mcl1       | 0.492125 | 1.13E-18 | 4.46E-17 |
| Uqcrh      | 0.428858 | 1.23E-18 | 4.86E-17 |
| App        | 0.29564  | 1.12E-18 | 4.46E-17 |
| Rpl24      | 0.5507   | 1.50E-18 | 5.83E-17 |
| Eef2       | 0.426602 | 1.47E-18 | 5.73E-17 |
| S1pr1      | 0.42813  | 1.48E-18 | 5.76E-17 |
| Cox7a2l    | 0.505973 | 1.93E-18 | 7.47E-17 |
| Rpl15      | 0.507924 | 2.02E-18 | 7.78E-17 |
| Fam117b    | 0.834331 | 2.86E-18 | 1.10E-16 |
| Anxa7      | 0.702717 | 3.31E-18 | 1.26E-16 |
| Klf3       | 0.643925 | 3.82E-18 | 1.45E-16 |
| Adipor2    | 0.623373 | 4.78E-18 | 1.81E-16 |
| Midn       | 0.779182 | 5.26E-18 | 1.99E-16 |
| Lpl        | 2.839778 | 7.74E-18 | 2.90E-16 |
| Sertad1    | 1.033539 | 6.19E-18 | 2.33E-16 |
| Ppp1r15a   | 1.047078 | 8.17E-18 | 3.05E-16 |
| Smad7      | 0.589762 | 7.36E-18 | 2.76E-16 |
| Nfkbiz     | 1.434361 | 9.49E-18 | 3.53E-16 |
| Gde1       | 0.812107 | 9.06E-18 | 3.37E-16 |

|           |          |          |          |
|-----------|----------|----------|----------|
| Bcr       | 1.006253 | 1.12E-17 | 4.13E-16 |
| Il6ra     | 1.926822 | 1.46E-17 | 5.31E-16 |
| Serpinb1a | 1.764627 | 1.48E-17 | 5.40E-16 |
| Ctsl      | 0.592574 | 1.15E-17 | 4.21E-16 |
| Ctsb      | 0.641036 | 1.21E-17 | 4.43E-16 |
| Naca      | 0.390892 | 1.12E-17 | 4.13E-16 |
| Rbm3      | 0.487173 | 1.32E-17 | 4.83E-16 |
| Serpinb9  | 1.068106 | 1.85E-17 | 6.68E-16 |
| Arl6ip5   | 0.605227 | 1.70E-17 | 6.16E-16 |
| Gm26532   | 0.99649  | 2.04E-17 | 7.36E-16 |
| Flot1     | 1.102356 | 2.28E-17 | 8.17E-16 |
| Gng5      | 0.401813 | 2.12E-17 | 7.60E-16 |
| 2810025M  | 0.777275 | 2.52E-17 | 8.97E-16 |
| Rnd1      | 2.386156 | 3.39E-17 | 1.19E-15 |
| Eci2      | 0.76081  | 2.60E-17 | 9.25E-16 |
| Stt3b     | 0.852971 | 2.76E-17 | 9.80E-16 |
| Pecam1    | 0.382663 | 2.33E-17 | 8.32E-16 |
| Rplp1     | 0.282944 | 2.87E-17 | 1.01E-15 |
| Tmsb4x    | 0.231262 | 2.89E-17 | 1.02E-15 |
| Mrpl52    | 0.695951 | 5.27E-17 | 1.85E-15 |
| Mat2a     | 0.557878 | 5.27E-17 | 1.85E-15 |
| Kcna5     | 2.195582 | 1.10E-16 | 3.79E-15 |
| Pglyrp1   | 0.521876 | 8.69E-17 | 3.03E-15 |
| Eif3f     | 0.453254 | 9.15E-17 | 3.18E-15 |
| Rhoj      | 0.611495 | 1.31E-16 | 4.50E-15 |
| Tnfrsf12a | 1.325899 | 1.60E-16 | 5.45E-15 |
| Osmr      | 0.803801 | 1.70E-16 | 5.78E-15 |
| Clip1     | 0.600807 | 1.95E-16 | 6.61E-15 |
| Tnfaip8l1 | 1.726253 | 2.50E-16 | 8.46E-15 |
| Pnp       | 0.794728 | 3.03E-16 | 1.02E-14 |
| Nr1d1     | 0.781814 | 3.04E-16 | 1.02E-14 |
| Adarb1    | 1.463458 | 4.24E-16 | 1.42E-14 |
| Nde1      | 0.99903  | 3.82E-16 | 1.28E-14 |
| Lysmd2    | 0.725526 | 3.61E-16 | 1.21E-14 |
| Steap3    | 1.419364 | 4.87E-16 | 1.62E-14 |
| Rpl5      | 0.411395 | 3.79E-16 | 1.27E-14 |
| Cox5a     | 0.461259 | 4.69E-16 | 1.56E-14 |
| Il17ra    | 2.0065   | 6.41E-16 | 2.10E-14 |
| St3gal1   | 1.017885 | 5.95E-16 | 1.96E-14 |
| Pabpc1    | 0.531064 | 5.51E-16 | 1.82E-14 |
| Klf13     | 0.503626 | 6.29E-16 | 2.07E-14 |
| Dab2      | 0.771004 | 7.75E-16 | 2.53E-14 |
| Klf9      | 0.481688 | 7.74E-16 | 2.53E-14 |
| Rpsa-ps10 | 0.533644 | 8.64E-16 | 2.81E-14 |
| Rpl22l1   | 0.49612  | 9.49E-16 | 3.07E-14 |
| Gimap4    | 1.765013 | 1.29E-15 | 4.12E-14 |
| Pla2g4a   | 1.899275 | 1.60E-15 | 5.12E-14 |



|            |          |          |          |
|------------|----------|----------|----------|
| Dock9      | 0.48253  | 1.25E-15 | 4.01E-14 |
| Csnk1a1    | 0.447913 | 1.25E-15 | 4.02E-14 |
| Gm8420     | 1.200982 | 1.62E-15 | 5.15E-14 |
| Gabarap    | 0.453324 | 1.61E-15 | 5.14E-14 |
| Cebpb      | 1.187518 | 2.04E-15 | 6.46E-14 |
| H1f2       | 0.739131 | 2.23E-15 | 7.04E-14 |
| Cadm3      | 3.493587 | 3.05E-15 | 9.59E-14 |
| Smad1      | 0.665941 | 2.44E-15 | 7.69E-14 |
| Cracr2b    | 0.690121 | 3.09E-15 | 9.68E-14 |
| Rhoc       | 0.541863 | 3.17E-15 | 9.91E-14 |
| Ubal2      | 0.722591 | 3.58E-15 | 1.12E-13 |
| Nectin2    | 1.244382 | 4.40E-15 | 1.36E-13 |
| Nfe2l2     | 0.673581 | 4.57E-15 | 1.41E-13 |
| Tsc22d3    | 0.514828 | 4.95E-15 | 1.53E-13 |
| Rap1b      | 0.490841 | 5.98E-15 | 1.84E-13 |
| Cdkn2d     | 0.920959 | 6.88E-15 | 2.11E-13 |
| Tcf23      | 2.476343 | 8.51E-15 | 2.57E-13 |
| Zfas1      | 0.966143 | 7.63E-15 | 2.32E-13 |
| Fam189a2   | 1.17185  | 7.70E-15 | 2.33E-13 |
| Cdc42ep4   | 0.832443 | 7.65E-15 | 2.32E-13 |
| Med13l     | 0.650036 | 7.48E-15 | 2.28E-13 |
| B4galt4    | 0.783909 | 9.42E-15 | 2.84E-13 |
| Csf2rb     | 4.961936 | 1.41E-14 | 4.21E-13 |
| Npdc1      | 0.888978 | 1.21E-14 | 3.63E-13 |
| Emilin1    | 2.261756 | 1.81E-14 | 5.35E-13 |
| Carhsp1    | 1.318034 | 1.91E-14 | 5.64E-13 |
| Txn1       | 0.434258 | 1.71E-14 | 5.09E-13 |
| Myh9       | 0.407855 | 1.75E-14 | 5.21E-13 |
| Ckap4      | 0.937868 | 2.13E-14 | 6.29E-13 |
| Cyb561     | 2.86296  | 2.88E-14 | 8.40E-13 |
| Pkig       | 0.512104 | 2.54E-14 | 7.42E-13 |
| Lima1      | 0.538676 | 3.56E-14 | 1.03E-12 |
| BC028528   | 0.54434  | 3.92E-14 | 1.13E-12 |
| Hpcal1     | 0.7998   | 4.72E-14 | 1.35E-12 |
| St6galnac2 | 0.632298 | 4.72E-14 | 1.35E-12 |
| Sox17      | 0.467909 | 4.74E-14 | 1.35E-12 |
| Hnrnpa0    | 0.510769 | 5.69E-14 | 1.61E-12 |
| Cd81       | 0.373811 | 5.42E-14 | 1.55E-12 |
| Bcl3       | 1.59451  | 6.95E-14 | 1.96E-12 |
| Col4a2     | 0.452265 | 6.03E-14 | 1.71E-12 |
| Ccny       | 0.542981 | 6.46E-14 | 1.82E-12 |
| Scn1b      | 1.669255 | 8.18E-14 | 2.29E-12 |
| Ppp1r9b    | 0.831292 | 7.67E-14 | 2.15E-12 |
| Ndufa6     | 0.454848 | 7.26E-14 | 2.04E-12 |
| Ssr4       | 0.587635 | 9.35E-14 | 2.60E-12 |
| 1810037l1  | 0.400206 | 8.71E-14 | 2.42E-12 |
| Sting1     | 2.138671 | 1.20E-13 | 3.32E-12 |

|           |          |          |          |
|-----------|----------|----------|----------|
| Serpinb6a | 0.561012 | 1.07E-13 | 2.95E-12 |
| Per1      | 0.913895 | 1.24E-13 | 3.39E-12 |
| Elk3      | 0.532926 | 1.31E-13 | 3.58E-12 |
| Adgrl4    | 0.335407 | 1.22E-13 | 3.36E-12 |
| Fabp4     | 2.628277 | 1.68E-13 | 4.57E-12 |
| Meox1     | 1.42231  | 1.63E-13 | 4.45E-12 |
| Plpp1     | 0.944341 | 1.68E-13 | 4.57E-12 |
| Ankrd13a  | 0.708025 | 1.67E-13 | 4.57E-12 |
| Abrac1    | 0.887388 | 1.76E-13 | 4.78E-12 |
| Bnip3     | 0.663657 | 1.87E-13 | 5.06E-12 |
| Slc12a7   | 1.174772 | 2.25E-13 | 6.08E-12 |
| Aprt      | 0.891191 | 2.61E-13 | 7.05E-12 |
| Ctla2b    | 2.017544 | 2.98E-13 | 8.02E-12 |
| Ldb2      | 1.211187 | 3.61E-13 | 9.66E-12 |
| Rdx       | 0.383586 | 3.24E-13 | 8.70E-12 |
| Il2rg     | 1.904907 | 4.88E-13 | 1.30E-11 |
| Lamp2     | 0.607645 | 4.41E-13 | 1.18E-11 |
| Sp3       | 0.58794  | 4.44E-13 | 1.18E-11 |
| Cnot6     | 0.543838 | 4.60E-13 | 1.22E-11 |
| Ptp4a2    | 0.434723 | 4.92E-13 | 1.30E-11 |
| Sorbs3    | 0.857597 | 5.59E-13 | 1.48E-11 |
| Eif4ebp1  | 1.189281 | 6.33E-13 | 1.67E-11 |
| Dcun1d3   | 0.802549 | 6.65E-13 | 1.75E-11 |
| Ralb      | 0.720568 | 6.78E-13 | 1.78E-11 |
| Plscr3    | 0.863683 | 6.89E-13 | 1.81E-11 |
| Slco2b1   | 0.650789 | 6.66E-13 | 1.75E-11 |
| Ehd1      | 0.933129 | 7.80E-13 | 2.04E-11 |
| Myliip    | 1.179241 | 8.85E-13 | 2.31E-11 |
| A4galt    | 0.833053 | 1.04E-12 | 2.69E-11 |
| Wasf2     | 0.412247 | 9.64E-13 | 2.51E-11 |
| Mrtfb     | 0.476336 | 1.03E-12 | 2.69E-11 |
| Gm30571   | 1.717706 | 1.29E-12 | 3.32E-11 |
| Hilpda    | 1.305581 | 1.28E-12 | 3.29E-11 |
| Clca3a1   | 3.981993 | 1.46E-12 | 3.76E-11 |
| Tbc1d15   | 0.796717 | 1.50E-12 | 3.85E-11 |
| F11r      | 0.591271 | 1.56E-12 | 4.00E-11 |
| Klhl2     | 0.725151 | 1.68E-12 | 4.30E-11 |
| Cirbp     | 0.519008 | 1.62E-12 | 4.15E-11 |
| Slc29a1   | 1.001647 | 1.80E-12 | 4.60E-11 |
| Rps10     | 0.406972 | 2.21E-12 | 5.62E-11 |
| Mxd4      | 0.44828  | 2.38E-12 | 6.02E-11 |
| Hspa5     | 0.431801 | 2.67E-12 | 6.74E-11 |
| Vmp1      | 0.937764 | 3.06E-12 | 7.72E-11 |
| Ing2      | 0.81723  | 3.33E-12 | 8.38E-11 |
| Hipk1     | 0.558318 | 3.76E-12 | 9.44E-11 |
| H2-Q4     | 0.677739 | 3.88E-12 | 9.74E-11 |
| Plekho1   | 1.822524 | 4.35E-12 | 1.08E-10 |

|          |          |          |          |
|----------|----------|----------|----------|
| Casp4    | 2.402408 | 4.49E-12 | 1.11E-10 |
| Fam13c   | 0.538974 | 4.20E-12 | 1.05E-10 |
| Gclm     | 0.580877 | 4.27E-12 | 1.06E-10 |
| Prrt4    | 0.914766 | 4.56E-12 | 1.12E-10 |
| Pfdn5    | 0.313496 | 4.32E-12 | 1.07E-10 |
| Rnase4   | 0.811766 | 5.40E-12 | 1.32E-10 |
| H1f0     | 0.629204 | 5.35E-12 | 1.32E-10 |
| Blvrb    | 0.695692 | 5.42E-12 | 1.33E-10 |
| Rnf103   | 0.623253 | 5.64E-12 | 1.38E-10 |
| Cd47     | 0.422548 | 5.44E-12 | 1.33E-10 |
| Rhoa     | 0.292327 | 5.74E-12 | 1.40E-10 |
| Edn1     | 0.741695 | 7.16E-12 | 1.74E-10 |
| Rgs16    | 1.480488 | 8.17E-12 | 1.98E-10 |
| Trim37   | 0.916115 | 8.37E-12 | 2.02E-10 |
| Aldh2    | 0.399612 | 8.33E-12 | 2.01E-10 |
| Plec     | 0.496249 | 8.56E-12 | 2.06E-10 |
| Rassf4   | 0.973219 | 9.44E-12 | 2.27E-10 |
| Mbnl2    | 0.428527 | 1.09E-11 | 2.60E-10 |
| Rpl13a   | 0.492805 | 1.16E-11 | 2.77E-10 |
| Imp3     | 0.60394  | 1.21E-11 | 2.87E-10 |
| 2500002B | 1.820164 | 1.32E-11 | 3.13E-10 |
| Ndufc2   | 0.431521 | 1.18E-11 | 2.82E-10 |
| Ildr2    | 1.153108 | 1.46E-11 | 3.45E-10 |
| Tmed10   | 0.373327 | 1.32E-11 | 3.13E-10 |
| Avpi1    | 0.998981 | 1.48E-11 | 3.50E-10 |
| Cdc42ep3 | 0.598182 | 1.56E-11 | 3.67E-10 |
| Nck1     | 0.577323 | 1.54E-11 | 3.61E-10 |
| Eif3h    | 0.413399 | 1.50E-11 | 3.55E-10 |
| Ostf1    | 0.463832 | 1.63E-11 | 3.83E-10 |
| Net1     | 0.676915 | 1.69E-11 | 3.95E-10 |
| Map1lc3b | 0.406365 | 1.71E-11 | 4.00E-10 |
| Tmem159  | 0.838355 | 1.92E-11 | 4.47E-10 |
| Prex2    | 0.461869 | 2.00E-11 | 4.66E-10 |
| Spop     | 0.443293 | 2.36E-11 | 5.47E-10 |
| Prorp    | 1.173154 | 2.81E-11 | 6.46E-10 |
| Insr     | 0.489153 | 3.00E-11 | 6.89E-10 |
| Ctsa     | 0.801145 | 3.28E-11 | 7.49E-10 |
| Leprot   | 0.55049  | 3.34E-11 | 7.61E-10 |
| Adgrl3   | 0.92928  | 3.55E-11 | 8.06E-10 |
| Mrpl30   | 0.618926 | 3.54E-11 | 8.05E-10 |
| Fn1      | 0.295247 | 3.78E-11 | 8.53E-10 |
| Kdelr1   | 0.578182 | 4.17E-11 | 9.38E-10 |
| Ninj1    | 0.842617 | 4.39E-11 | 9.86E-10 |
| Ccnd1    | 0.759984 | 4.66E-11 | 1.05E-09 |
| Ccdc85b  | 0.359769 | 4.72E-11 | 1.06E-09 |
| Eif3e    | 0.469876 | 5.07E-11 | 1.13E-09 |
| Eif3k    | 0.434904 | 5.68E-11 | 1.27E-09 |

|          |          |          |          |
|----------|----------|----------|----------|
| Kctd12   | 0.536126 | 5.95E-11 | 1.33E-09 |
| Mall     | 1.030332 | 6.47E-11 | 1.44E-09 |
| Tmem189  | 0.898649 | 6.87E-11 | 1.52E-09 |
| Maff     | 1.208237 | 7.30E-11 | 1.62E-09 |
| Mir22hg  | 1.90382  | 8.58E-11 | 1.89E-09 |
| Arpc2    | 0.326178 | 7.61E-11 | 1.68E-09 |
| Vamp5    | 0.529261 | 8.33E-11 | 1.84E-09 |
| Bex3     | 0.664716 | 8.68E-11 | 1.91E-09 |
| Sptlc2   | 0.661427 | 1.03E-10 | 2.25E-09 |
| Ppic     | 0.714878 | 1.09E-10 | 2.37E-09 |
| Rin3     | 1.015817 | 1.24E-10 | 2.71E-09 |
| Lrp5     | 0.763882 | 1.28E-10 | 2.78E-09 |
| Cyp2d22  | 0.536155 | 1.29E-10 | 2.80E-09 |
| Gjc1     | 0.485799 | 1.38E-10 | 2.98E-09 |
| Ech1     | 0.435865 | 1.37E-10 | 2.98E-09 |
| Sdk2     | 2.672341 | 1.75E-10 | 3.76E-09 |
| Pnpla2   | 0.619418 | 1.63E-10 | 3.50E-09 |
| Plxnb2   | 1.002049 | 1.74E-10 | 3.74E-09 |
| Map3k8   | 1.167396 | 1.85E-10 | 3.94E-09 |
| Rac1     | 0.33183  | 1.77E-10 | 3.79E-09 |
| Nid1     | 0.586883 | 1.87E-10 | 3.98E-09 |
| Actn1    | 0.525035 | 1.86E-10 | 3.96E-09 |
| Card19   | 0.579554 | 2.14E-10 | 4.55E-09 |
| Sem1     | 0.33056  | 2.27E-10 | 4.80E-09 |
| Myl12b   | 0.409869 | 2.33E-10 | 4.92E-09 |
| Bhlhe40  | 0.474921 | 2.43E-10 | 5.11E-09 |
| Syng2    | 0.743449 | 2.66E-10 | 5.60E-09 |
| Acvrl1   | 0.347052 | 2.72E-10 | 5.70E-09 |
| Adcy4    | 0.778797 | 2.90E-10 | 6.07E-09 |
| Ppfibp1  | 0.412146 | 2.98E-10 | 6.22E-09 |
| Ugcg     | 1.225637 | 4.19E-10 | 8.75E-09 |
| Zbtb7a   | 0.474621 | 4.28E-10 | 8.92E-09 |
| Morf4l1  | 0.295006 | 4.80E-10 | 9.96E-09 |
| Sh3bgrl3 | 0.370221 | 5.04E-10 | 1.04E-08 |
| Cd14     | 3.596764 | 6.26E-10 | 1.29E-08 |
| Myrip    | 0.966437 | 5.84E-10 | 1.20E-08 |
| Akap13   | 0.414921 | 5.63E-10 | 1.16E-08 |
| Depp1    | 0.565341 | 6.63E-10 | 1.36E-08 |
| Lrp10    | 0.59241  | 6.57E-10 | 1.35E-08 |
| Cpt2     | 1.157295 | 7.08E-10 | 1.44E-08 |
| Ppp1r2   | 0.385568 | 6.90E-10 | 1.41E-08 |
| Clec14a  | 0.709947 | 7.68E-10 | 1.56E-08 |
| Rassf1   | 0.570042 | 8.10E-10 | 1.64E-08 |
| Doc2b    | 1.931885 | 8.79E-10 | 1.77E-08 |
| Flt4     | 0.610705 | 8.55E-10 | 1.73E-08 |
| Coq10b   | 0.691441 | 9.99E-10 | 2.01E-08 |
| Ubl3     | 0.370174 | 1.08E-09 | 2.16E-08 |

|         |          |          |          |
|---------|----------|----------|----------|
| Acaa2   | 0.543478 | 1.20E-09 | 2.40E-08 |
| Aoc3    | 0.983634 | 1.31E-09 | 2.60E-08 |
| Mtch1   | 0.471393 | 1.29E-09 | 2.57E-08 |
| Lmbr1   | 1.120798 | 1.39E-09 | 2.75E-08 |
| Wnt5a   | 1.960314 | 1.47E-09 | 2.90E-08 |
| Laptn4a | 0.268616 | 1.31E-09 | 2.60E-08 |
| Pold4   | 0.736607 | 1.51E-09 | 2.97E-08 |
| Cd302   | 1.100798 | 1.56E-09 | 3.06E-08 |
| Casp8   | 0.800447 | 1.53E-09 | 3.01E-08 |
| Acadl   | 0.529657 | 1.52E-09 | 3.00E-08 |
| Sod2    | 0.54854  | 1.56E-09 | 3.06E-08 |
| Sema3g  | 0.730505 | 1.58E-09 | 3.09E-08 |
| Ptges   | 1.833036 | 1.67E-09 | 3.27E-08 |
| Nek6    | 1.497679 | 1.74E-09 | 3.40E-08 |
| H2az1   | 0.329739 | 1.61E-09 | 3.16E-08 |
| Gm49708 | 1.887039 | 2.15E-09 | 4.15E-08 |
| Cstb    | 0.550958 | 2.03E-09 | 3.95E-08 |
| Fam43a  | 0.839041 | 2.09E-09 | 4.04E-08 |
| Use1    | 0.445697 | 2.07E-09 | 4.02E-08 |
| Tmod3   | 0.391005 | 2.13E-09 | 4.12E-08 |
| Mrps24  | 0.482521 | 2.17E-09 | 4.18E-08 |
| Birc3   | 1.185921 | 2.30E-09 | 4.41E-08 |
| P4hb    | 0.472308 | 2.21E-09 | 4.26E-08 |
| Dad1    | 0.375598 | 2.27E-09 | 4.37E-08 |
| Pfn1    | 0.315743 | 2.28E-09 | 4.37E-08 |
| Ndst1   | 0.607287 | 2.40E-09 | 4.59E-08 |
| Vars    | 1.149172 | 2.50E-09 | 4.78E-08 |
| Sod1    | 0.362891 | 2.66E-09 | 5.07E-08 |
| Procr   | 1.229086 | 2.95E-09 | 5.59E-08 |
| Orai1   | 0.609026 | 2.87E-09 | 5.45E-08 |
| Plekho2 | 1.267536 | 2.99E-09 | 5.65E-08 |
| Cdc14a  | 0.742442 | 3.27E-09 | 6.18E-08 |
| Gimap5  | 0.811665 | 3.46E-09 | 6.50E-08 |
| Mctp1   | 2.794585 | 3.92E-09 | 7.31E-08 |
| Ppp1r18 | 0.78734  | 3.72E-09 | 6.97E-08 |
| Vps28   | 0.447136 | 3.66E-09 | 6.85E-08 |
| Eif1a   | 0.681329 | 3.89E-09 | 7.27E-08 |
| Jak3    | 1.6112   | 4.04E-09 | 7.52E-08 |
| Ccdc141 | 0.377655 | 4.02E-09 | 7.50E-08 |
| Mamstr  | 1.343049 | 4.32E-09 | 8.04E-08 |
| Txndc17 | 0.445515 | 4.92E-09 | 9.15E-08 |
| Gatm    | 0.546791 | 4.99E-09 | 9.26E-08 |
| Gda     | 2.18283  | 5.43E-09 | 1.00E-07 |
| Picalm  | 0.374661 | 5.01E-09 | 9.29E-08 |
| Gm12866 | 1.262138 | 5.43E-09 | 1.00E-07 |
| Jam2    | 0.366754 | 5.32E-09 | 9.83E-08 |
| H2-T23  | 0.457443 | 5.52E-09 | 1.01E-07 |

|           |          |          |          |
|-----------|----------|----------|----------|
| Cln6      | 1.657776 | 6.42E-09 | 1.17E-07 |
| Ciart     | 1.758729 | 6.57E-09 | 1.20E-07 |
| Rara      | 0.902476 | 6.60E-09 | 1.20E-07 |
| Lpcat3    | 0.699736 | 6.94E-09 | 1.26E-07 |
| Slc30a1   | 0.368342 | 7.25E-09 | 1.31E-07 |
| Kctd17    | 0.873902 | 8.10E-09 | 1.46E-07 |
| Entpd1    | 0.522274 | 8.16E-09 | 1.47E-07 |
| Ctsz      | 0.514912 | 8.18E-09 | 1.47E-07 |
| Gstt2     | 0.727484 | 8.43E-09 | 1.51E-07 |
| Arhgap26  | 0.821891 | 8.50E-09 | 1.52E-07 |
| Vat1      | 0.416932 | 8.72E-09 | 1.56E-07 |
| 2210408F2 | 1.545609 | 9.64E-09 | 1.71E-07 |
| Cyth1     | 0.828495 | 9.51E-09 | 1.70E-07 |
| Tubb5     | 0.339793 | 9.61E-09 | 1.71E-07 |
| Arhgef3   | 0.6213   | 1.03E-08 | 1.83E-07 |
| Gimap1    | 0.469729 | 1.06E-08 | 1.87E-07 |
| Gcnt2     | 0.442072 | 1.07E-08 | 1.89E-07 |
| Ercc1     | 0.989476 | 1.19E-08 | 2.09E-07 |
| Kdsr      | 0.722939 | 1.17E-08 | 2.07E-07 |
| Dbp       | 0.614382 | 1.18E-08 | 2.09E-07 |
| Prr13     | 0.597342 | 1.27E-08 | 2.23E-07 |
| Smad6     | 0.955862 | 1.38E-08 | 2.40E-07 |
| Ccnl1     | 0.464575 | 1.34E-08 | 2.35E-07 |
| Cds2      | 0.483485 | 1.74E-08 | 3.02E-07 |
| Ptbp3     | 0.36205  | 1.78E-08 | 3.09E-07 |
| Rab12     | 0.426017 | 1.82E-08 | 3.15E-07 |
| Pde4b     | 0.777218 | 1.87E-08 | 3.23E-07 |
| Ctsw      | 1.387712 | 2.10E-08 | 3.62E-07 |
| Trappc6a  | 0.76867  | 2.08E-08 | 3.58E-07 |
| Nop53     | 0.402851 | 2.05E-08 | 3.53E-07 |
| Fryl      | 0.337412 | 2.14E-08 | 3.68E-07 |
| Tcn2      | 0.605903 | 2.29E-08 | 3.93E-07 |
| Gas5      | 0.334058 | 2.30E-08 | 3.95E-07 |
| Fbxw2     | 0.499335 | 2.57E-08 | 4.37E-07 |
| Dap       | 0.722955 | 2.68E-08 | 4.55E-07 |
| Manf      | 0.491137 | 2.65E-08 | 4.50E-07 |
| Mtmr11    | 1.141818 | 2.80E-08 | 4.75E-07 |
| Asap1     | 0.508356 | 2.79E-08 | 4.73E-07 |
| Tsc22d4   | 0.608569 | 2.83E-08 | 4.79E-07 |
| Pxdc1     | 0.800429 | 2.90E-08 | 4.89E-07 |
| Csf1      | 1.070016 | 2.98E-08 | 5.02E-07 |
| Snhg8     | 0.457312 | 3.04E-08 | 5.10E-07 |
| Eif1      | 0.18634  | 3.16E-08 | 5.30E-07 |
| Ltc4s     | 1.504688 | 3.56E-08 | 5.96E-07 |
| Pard3     | 0.561665 | 3.74E-08 | 6.23E-07 |
| Pik3ip1   | 0.59059  | 3.77E-08 | 6.28E-07 |
| Egr3      | 1.388554 | 3.95E-08 | 6.56E-07 |

|         |          |          |          |
|---------|----------|----------|----------|
| Eif3i   | 0.5023   | 4.03E-08 | 6.69E-07 |
| Unc45b  | 0.648139 | 4.05E-08 | 6.72E-07 |
| Tpm4    | 0.323228 | 3.98E-08 | 6.61E-07 |
| Rasip1  | 0.338274 | 4.00E-08 | 6.64E-07 |
| Fmn12   | 0.714515 | 4.21E-08 | 6.95E-07 |
| C1ra    | 2.296424 | 4.49E-08 | 7.38E-07 |
| Spaar   | 0.571424 | 4.32E-08 | 7.12E-07 |
| Nsmce1  | 0.578182 | 4.43E-08 | 7.28E-07 |
| Pcnx    | 0.485141 | 4.72E-08 | 7.74E-07 |
| Wwc2    | 0.352101 | 4.74E-08 | 7.76E-07 |
| Tmbim1  | 0.609262 | 4.95E-08 | 8.10E-07 |
| Spns2   | 0.893344 | 5.30E-08 | 8.65E-07 |
| Mgat4a  | 0.890118 | 5.44E-08 | 8.86E-07 |
| Pawr    | 1.311859 | 5.62E-08 | 9.14E-07 |
| Trf     | 1.38516  | 5.74E-08 | 9.33E-07 |
| Elob    | 0.284449 | 5.76E-08 | 9.36E-07 |
| Mbd2    | 0.425622 | 5.90E-08 | 9.58E-07 |
| Sh2d3c  | 0.685604 | 6.07E-08 | 9.83E-07 |
| Rtl8b   | 0.659423 | 7.24E-08 | 1.17E-06 |
| Spry4   | 0.98631  | 7.41E-08 | 1.19E-06 |
| Bnip3l  | 0.315451 | 7.50E-08 | 1.21E-06 |
| Akr1a1  | 0.291622 | 7.68E-08 | 1.23E-06 |
| Nenf    | 0.360837 | 8.14E-08 | 1.30E-06 |
| Ddit4   | 0.415259 | 8.32E-08 | 1.33E-06 |
| Cfl1    | 0.26007  | 8.26E-08 | 1.32E-06 |
| S100a13 | 0.295872 | 8.42E-08 | 1.34E-06 |
| Bmx     | 0.621219 | 8.89E-08 | 1.42E-06 |
| C1s1    | 1.379488 | 9.19E-08 | 1.46E-06 |
| Susd6   | 0.552714 | 9.37E-08 | 1.49E-06 |
| Fbxo6   | 0.814951 | 1.07E-07 | 1.70E-06 |
| Rell1   | 0.596566 | 1.11E-07 | 1.76E-06 |
| H2-T22  | 0.72836  | 1.14E-07 | 1.81E-06 |
| MIph    | 1.545426 | 1.24E-07 | 1.95E-06 |
| Bst1    | 2.766956 | 1.28E-07 | 2.01E-06 |
| Hyi     | 1.170837 | 1.36E-07 | 2.13E-06 |
| Emcn    | 0.310156 | 1.34E-07 | 2.11E-06 |
| Lcp1    | 0.820603 | 1.41E-07 | 2.20E-06 |
| Atp7a   | 0.730716 | 1.42E-07 | 2.23E-06 |
| Itpr1l1 | 0.807785 | 1.49E-07 | 2.33E-06 |
| Il3ra   | 1.26691  | 1.54E-07 | 2.40E-06 |
| Pdia3   | 0.329805 | 1.50E-07 | 2.34E-06 |
| Ifitm10 | 2.208516 | 1.70E-07 | 2.63E-06 |
| Timm10b | 0.510927 | 1.64E-07 | 2.54E-06 |
| Emp3    | 0.793288 | 1.69E-07 | 2.61E-06 |
| H2-Ab1  | 1.57725  | 1.78E-07 | 2.75E-06 |
| Sra1    | 0.637931 | 1.86E-07 | 2.88E-06 |
| Psenen  | 0.434161 | 1.89E-07 | 2.92E-06 |

|            |          |          |          |
|------------|----------|----------|----------|
| Zmiz1      | 0.357393 | 2.00E-07 | 3.08E-06 |
| Castor1    | 0.700399 | 2.22E-07 | 3.41E-06 |
| Septin10   | 0.649588 | 2.23E-07 | 3.41E-06 |
| Garre1     | 0.272966 | 2.27E-07 | 3.48E-06 |
| Cebpg      | 0.459408 | 2.34E-07 | 3.57E-06 |
| Tnip1      | 0.841173 | 2.44E-07 | 3.72E-06 |
| Psap       | 0.280411 | 2.38E-07 | 3.62E-06 |
| Plscr2     | 0.996493 | 2.47E-07 | 3.75E-06 |
| Anxa3      | 0.28631  | 2.41E-07 | 3.67E-06 |
| Hif3a      | 3.098803 | 2.62E-07 | 3.96E-06 |
| St6galnac6 | 1.050403 | 2.53E-07 | 3.84E-06 |
| Arid5a     | 0.778482 | 2.63E-07 | 3.99E-06 |
| Myzap      | 1.450408 | 2.71E-07 | 4.10E-06 |
| Arl4d      | 0.543086 | 2.79E-07 | 4.21E-06 |
| Rps15a-ps  | 0.504249 | 2.89E-07 | 4.36E-06 |
| Igf2r      | 0.809174 | 3.14E-07 | 4.72E-06 |
| Crlf2      | 0.72604  | 3.13E-07 | 4.70E-06 |
| Brk1       | 0.349956 | 3.20E-07 | 4.78E-06 |
| Slc31a1    | 0.511721 | 3.25E-07 | 4.86E-06 |
| Tfpi       | 0.881843 | 3.34E-07 | 4.98E-06 |
| Atp6v0e    | 0.353569 | 3.29E-07 | 4.91E-06 |
| Dcbld2     | 0.766923 | 3.67E-07 | 5.44E-06 |
| Pvr        | 0.767655 | 3.76E-07 | 5.56E-06 |
| Hspa1a     | 0.462714 | 3.78E-07 | 5.58E-06 |
| Rapgef6    | 0.509834 | 3.88E-07 | 5.73E-06 |
| Chst15     | 0.820753 | 3.93E-07 | 5.79E-06 |
| Ier5l      | 0.610152 | 4.10E-07 | 6.01E-06 |
| Hsdl2      | 0.752268 | 4.11E-07 | 6.02E-06 |
| Anxa1      | 0.704079 | 4.17E-07 | 6.09E-06 |
| Lym1       | 0.811224 | 4.15E-07 | 6.07E-06 |
| Plk3       | 1.321767 | 4.26E-07 | 6.22E-06 |
| Esyt1      | 0.483106 | 4.26E-07 | 6.22E-06 |
| Chmp2b     | 0.528319 | 4.43E-07 | 6.46E-06 |
| Atp5d      | 0.31377  | 4.42E-07 | 6.44E-06 |
| Prkch      | 0.447876 | 4.48E-07 | 6.51E-06 |
| Esam       | 0.249773 | 4.57E-07 | 6.65E-06 |
| Abcg1      | 0.948295 | 4.81E-07 | 6.97E-06 |
| Mmd        | 0.643281 | 4.85E-07 | 7.02E-06 |
| Rps6ka3    | 0.468396 | 5.00E-07 | 7.24E-06 |
| Tamalin    | 0.459641 | 5.03E-07 | 7.27E-06 |
| Spsb2      | 0.971334 | 5.20E-07 | 7.49E-06 |
| Sorbs1     | 0.459687 | 5.14E-07 | 7.42E-06 |
| Pde4a      | 1.227153 | 5.25E-07 | 7.57E-06 |
| Mcam       | 0.54633  | 5.40E-07 | 7.76E-06 |
| Sash1      | 0.378292 | 5.79E-07 | 8.30E-06 |
| Slc48a1    | 0.618531 | 5.99E-07 | 8.58E-06 |
| Sema6b     | 0.950379 | 6.09E-07 | 8.71E-06 |



|          |          |          |          |
|----------|----------|----------|----------|
| Plscr1   | 0.870329 | 6.17E-07 | 8.81E-06 |
| Ndufa8   | 0.368367 | 6.49E-07 | 9.25E-06 |
| Pdgfc    | 2.93656  | 7.12E-07 | 1.01E-05 |
| Slc25a30 | 0.711229 | 7.05E-07 | 1.00E-05 |
| Ntn1     | 1.015553 | 7.46E-07 | 1.06E-05 |
| Ubl7     | 0.769749 | 7.63E-07 | 1.08E-05 |
| Mfsd10   | 0.798732 | 7.68E-07 | 1.09E-05 |
| Nebi     | 0.338489 | 7.60E-07 | 1.08E-05 |
| Traf1    | 1.985171 | 7.99E-07 | 1.13E-05 |
| Srsf5    | 0.272883 | 7.60E-07 | 1.08E-05 |
| Gata2    | 0.398213 | 8.38E-07 | 1.18E-05 |
| Vamp8    | 0.37271  | 8.38E-07 | 1.18E-05 |
| Cd74     | 1.649637 | 9.11E-07 | 1.27E-05 |
| Piezo1   | 0.544612 | 8.87E-07 | 1.24E-05 |
| Thap3    | 0.573151 | 8.97E-07 | 1.25E-05 |
| Ralbp1   | 0.323417 | 8.86E-07 | 1.24E-05 |
| Dusp6    | 0.476833 | 8.96E-07 | 1.25E-05 |
| H2-Q6    | 0.693623 | 9.10E-07 | 1.27E-05 |
| Ica1l    | 1.218902 | 9.62E-07 | 1.34E-05 |
| Snhg12   | 0.654074 | 1.01E-06 | 1.41E-05 |
| Spred3   | 1.711499 | 1.03E-06 | 1.44E-05 |
| Mt2      | 1.393812 | 1.08E-06 | 1.49E-05 |
| Apcdd1   | 0.374015 | 1.07E-06 | 1.48E-05 |
| Capns1   | 0.292029 | 1.07E-06 | 1.49E-05 |
| Mettl26  | 0.68592  | 1.14E-06 | 1.58E-05 |
| Churc1   | 0.54115  | 1.16E-06 | 1.60E-05 |
| Lrrc4    | 1.272132 | 1.20E-06 | 1.64E-05 |
| Hivep1   | 0.486135 | 1.18E-06 | 1.62E-05 |
| Ndfip1   | 0.303232 | 1.19E-06 | 1.63E-05 |
| Nrarp    | 0.752675 | 1.22E-06 | 1.67E-05 |
| Acot1    | 1.653867 | 1.27E-06 | 1.73E-05 |
| Rasl10a  | 1.931164 | 1.27E-06 | 1.73E-05 |
| Hint1    | 0.231756 | 1.23E-06 | 1.68E-05 |
| Fabp5    | 1.363733 | 1.28E-06 | 1.74E-05 |
| Pmp22    | 0.60326  | 1.44E-06 | 1.95E-05 |
| Chmp4b   | 0.392901 | 1.45E-06 | 1.96E-05 |
| Atp1a1   | 0.340378 | 1.45E-06 | 1.96E-05 |
| Ncoa7    | 0.610399 | 1.48E-06 | 2.00E-05 |
| Slc43a3  | 2.628529 | 1.57E-06 | 2.10E-05 |
| Mafk     | 0.684335 | 1.60E-06 | 2.15E-05 |
| Tspan14  | 0.595158 | 1.66E-06 | 2.22E-05 |
| Peli1    | 0.369549 | 1.83E-06 | 2.44E-05 |
| Mpnd     | 0.746252 | 1.87E-06 | 2.49E-05 |
| Msrb3    | 0.512077 | 1.87E-06 | 2.49E-05 |
| Higd2a   | 0.329764 | 1.90E-06 | 2.53E-05 |
| Fgfr3    | 1.007351 | 1.96E-06 | 2.60E-05 |
| Hspg2    | 0.400881 | 2.05E-06 | 2.72E-05 |

|           |          |          |          |
|-----------|----------|----------|----------|
| Eif4b     | 0.380279 | 2.10E-06 | 2.78E-05 |
| Sbds      | 0.366422 | 2.13E-06 | 2.81E-05 |
| Pim1      | 0.596875 | 2.15E-06 | 2.83E-05 |
| Pdlim1    | 0.869375 | 2.22E-06 | 2.92E-05 |
| Esd       | 0.383347 | 2.22E-06 | 2.92E-05 |
| Snx21     | 0.651018 | 2.23E-06 | 2.93E-05 |
| Chst1     | 3.942543 | 2.33E-06 | 3.06E-05 |
| Rpl14-ps1 | 0.381067 | 2.27E-06 | 2.97E-05 |
| Furin     | 0.494976 | 2.36E-06 | 3.09E-05 |
| Tnfaip8   | 0.625393 | 2.43E-06 | 3.17E-05 |
| Arhgap20  | 0.649791 | 2.47E-06 | 3.22E-05 |
| Tap1      | 0.770305 | 2.48E-06 | 3.24E-05 |
| Gm8730    | 0.939541 | 2.56E-06 | 3.34E-05 |
| Shld1     | 0.598099 | 2.56E-06 | 3.34E-05 |
| Mgst1     | 0.969983 | 2.61E-06 | 3.40E-05 |
| Pdk4      | 1.453378 | 2.67E-06 | 3.46E-05 |
| Psma6     | 0.317599 | 2.63E-06 | 3.42E-05 |
| Capzb     | 0.325622 | 2.69E-06 | 3.48E-05 |
| Ccdc9b    | 0.878282 | 2.79E-06 | 3.61E-05 |
| Ccp110    | 0.711399 | 2.88E-06 | 3.71E-05 |
| Robo4     | 0.36782  | 2.86E-06 | 3.69E-05 |
| Glrx      | 0.940792 | 2.92E-06 | 3.76E-05 |
| Dnajb1    | 0.493641 | 2.92E-06 | 3.76E-05 |
| Uqcrfs1   | 0.444304 | 2.93E-06 | 3.77E-05 |
| 1810058l2 | 0.441663 | 2.98E-06 | 3.83E-05 |
| Bcar3     | 0.737715 | 3.02E-06 | 3.88E-05 |
| Fth1-ps   | 2.152909 | 3.20E-06 | 4.09E-05 |
| Rtraf     | 0.374136 | 3.23E-06 | 4.12E-05 |
| Tmem234   | 0.331574 | 3.22E-06 | 4.12E-05 |
| Bbln      | 0.640341 | 3.30E-06 | 4.20E-05 |
| Ranbp9    | 0.533101 | 3.30E-06 | 4.20E-05 |
| Errfi1    | 0.693269 | 3.32E-06 | 4.22E-05 |
| Usp54     | 0.571768 | 3.48E-06 | 4.42E-05 |
| Vapa      | 0.341639 | 3.50E-06 | 4.44E-05 |
| Cyba      | 0.339683 | 3.54E-06 | 4.49E-05 |
| Arf4      | 0.350159 | 3.60E-06 | 4.55E-05 |
| Cd38      | 0.938681 | 3.65E-06 | 4.61E-05 |
| Sys1      | 0.426167 | 3.62E-06 | 4.58E-05 |
| Tcea3     | 0.928307 | 3.94E-06 | 4.95E-05 |
| Tor1aip2  | 0.56963  | 4.07E-06 | 5.12E-05 |
| Rnf144b   | 0.430892 | 4.18E-06 | 5.24E-05 |
| Ptpn1     | 0.468949 | 4.32E-06 | 5.42E-05 |
| Rilpl1    | 0.59219  | 4.55E-06 | 5.68E-05 |
| Mark3     | 0.383202 | 4.65E-06 | 5.79E-05 |
| Clybl     | 1.175896 | 4.76E-06 | 5.92E-05 |
| Rusc1     | 0.70275  | 4.75E-06 | 5.92E-05 |
| Gask1b    | 1.47403  | 5.11E-06 | 6.34E-05 |

|           |          |          |          |
|-----------|----------|----------|----------|
| Tmem100   | 1.067569 | 5.25E-06 | 6.48E-05 |
| Stx3      | 0.386589 | 5.13E-06 | 6.36E-05 |
| AW112010  | 0.49069  | 5.27E-06 | 6.49E-05 |
| Tinagl1   | 0.320605 | 5.22E-06 | 6.45E-05 |
| Adm       | 0.761592 | 5.34E-06 | 6.56E-05 |
| Tcp1      | 0.419567 | 5.30E-06 | 6.52E-05 |
| Jak1      | 0.381243 | 5.43E-06 | 6.67E-05 |
| Parp3     | 1.12562  | 5.60E-06 | 6.86E-05 |
| Atoh8     | 0.917761 | 5.76E-06 | 7.06E-05 |
| Eml1      | 0.65354  | 5.82E-06 | 7.12E-05 |
| Tnfrsf11a | 0.973704 | 5.91E-06 | 7.21E-05 |
| Gpi1      | 0.301635 | 6.18E-06 | 7.53E-05 |
| Gm49839   | 1.743869 | 6.35E-06 | 7.70E-05 |
| Chic2     | 0.432993 | 6.24E-06 | 7.59E-05 |
| Fam234a   | 0.850997 | 7.00E-06 | 8.46E-05 |
| Tmed9     | 0.315761 | 7.15E-06 | 8.63E-05 |
| Mxra8     | 0.79458  | 7.33E-06 | 8.83E-05 |
| Gm5292    | 1.08116  | 7.38E-06 | 8.88E-05 |
| Abi3      | 1.23693  | 7.46E-06 | 8.96E-05 |
| Slc35f5   | 0.687624 | 7.55E-06 | 9.06E-05 |
| Cd82      | 0.980591 | 7.66E-06 | 9.19E-05 |
| Trib1     | 0.902596 | 7.86E-06 | 9.40E-05 |
| Fus       | 0.241336 | 7.70E-06 | 9.22E-05 |
| Adipor1   | 0.284573 | 7.83E-06 | 9.37E-05 |
| Preb      | 0.610475 | 8.05E-06 | 9.62E-05 |
| Rpl36a    | 0.381059 | 8.10E-06 | 9.66E-05 |
| Cbr3      | 1.038642 | 8.29E-06 | 9.88E-05 |
| Sh3kbp1   | 0.76091  | 8.53E-06 | 0.000101 |
| Sigirr    | 0.485639 | 8.47E-06 | 0.000101 |
| Syn2      | 2.029922 | 8.66E-06 | 0.000103 |
| Snrpg     | 0.289289 | 8.62E-06 | 0.000102 |
| Setd5     | 0.358972 | 9.04E-06 | 0.000107 |
| Mgll      | 0.4778   | 9.14E-06 | 0.000108 |
| Lmo1      | 0.828185 | 9.26E-06 | 0.00011  |
| Fkbp7     | 0.599563 | 9.56E-06 | 0.000113 |
| Zfp697    | 1.5262   | 9.85E-06 | 0.000116 |
| Cenpb     | 0.342044 | 9.88E-06 | 0.000117 |
| H2aj      | 0.388911 | 9.93E-06 | 0.000117 |
| Epb41     | 0.376419 | 9.96E-06 | 0.000117 |
| Tifa      | 0.886171 | 1.09E-05 | 0.000127 |
| Itga2b    | 1.349229 | 1.10E-05 | 0.000129 |
| Apod      | 0.901954 | 1.12E-05 | 0.000131 |
| Ptpn14    | 0.441691 | 1.11E-05 | 0.000129 |
| Nbdy      | 0.446254 | 1.14E-05 | 0.000133 |
| Tmem50a   | 0.263611 | 1.14E-05 | 0.000133 |
| Mr1       | 0.807975 | 1.17E-05 | 0.000136 |
| Tmem44    | 0.549718 | 1.20E-05 | 0.000139 |

|           |          |          |          |
|-----------|----------|----------|----------|
| Mafg      | 0.486791 | 1.22E-05 | 0.000141 |
| Ssr3      | 0.371871 | 1.22E-05 | 0.000141 |
| Rab5a     | 0.382749 | 1.24E-05 | 0.000143 |
| Eftud2    | 0.512923 | 1.25E-05 | 0.000144 |
| Nudt9     | 0.542682 | 1.25E-05 | 0.000145 |
| Rfk       | 0.445532 | 1.27E-05 | 0.000147 |
| Tnfrsf1b  | 0.750604 | 1.29E-05 | 0.000148 |
| Irf2bpl   | 0.300053 | 1.30E-05 | 0.000149 |
| Trip10    | 0.556642 | 1.31E-05 | 0.00015  |
| Frrs1     | 1.282675 | 1.33E-05 | 0.000152 |
| Cdkn2aipn | 0.705332 | 1.33E-05 | 0.000153 |
| Elovl5    | 0.552066 | 1.34E-05 | 0.000153 |
| Sp3os     | 0.726661 | 1.36E-05 | 0.000156 |
| N4bp3     | 0.461247 | 1.39E-05 | 0.000159 |
| Gm15427   | 0.967662 | 1.41E-05 | 0.000161 |
| Prcp      | 0.68851  | 1.43E-05 | 0.000163 |
| Ftl1      | 0.19687  | 1.41E-05 | 0.000161 |
| Tbl1xr1   | 0.565978 | 1.45E-05 | 0.000165 |
| Elf4      | 1.777242 | 1.48E-05 | 0.000168 |
| Trarg1    | 1.383626 | 1.49E-05 | 0.000169 |
| Mrps34    | 0.558698 | 1.49E-05 | 0.000169 |
| Airn      | 1.071843 | 1.54E-05 | 0.000174 |
| Agtrap    | 0.548916 | 1.58E-05 | 0.000178 |
| 4833403J1 | 0.882201 | 1.63E-05 | 0.000184 |
| Smagp     | 0.46021  | 1.62E-05 | 0.000183 |
| Armcx2    | 0.757593 | 1.64E-05 | 0.000185 |
| Bcl10     | 0.45741  | 1.66E-05 | 0.000187 |
| Taf7      | 0.498804 | 1.66E-05 | 0.000187 |
| Ccdc28b   | 0.463931 | 1.67E-05 | 0.000188 |
| Sfxn1     | 0.544054 | 1.69E-05 | 0.00019  |
| Rrbp1     | 0.247841 | 1.70E-05 | 0.00019  |
| Grina     | 0.397184 | 1.72E-05 | 0.000193 |
| Ddx50     | 0.313051 | 1.82E-05 | 0.000203 |
| Thoc7     | 0.36725  | 1.86E-05 | 0.000207 |
| Crk       | 0.329359 | 1.89E-05 | 0.00021  |
| Gm609     | 0.640571 | 1.92E-05 | 0.000214 |
| Prelid1   | 0.429763 | 1.99E-05 | 0.000221 |
| Ramp3     | 0.831445 | 2.03E-05 | 0.000225 |
| Swap70    | 0.351389 | 2.03E-05 | 0.000224 |
| Ssu72     | 0.306907 | 2.03E-05 | 0.000224 |
| Lpp       | 0.357641 | 2.17E-05 | 0.000239 |
| Egfl7     | 0.178587 | 2.19E-05 | 0.000241 |
| Sat1      | 0.37245  | 2.22E-05 | 0.000243 |
| Ndrgr1    | 0.256813 | 2.21E-05 | 0.000243 |
| Polk      | 0.366696 | 2.21E-05 | 0.000243 |
| Aph1a     | 0.376067 | 2.23E-05 | 0.000245 |
| Mad2l2    | 0.790582 | 2.30E-05 | 0.000252 |

|          |          |          |          |
|----------|----------|----------|----------|
| Paqr7    | 0.573924 | 2.31E-05 | 0.000253 |
| Rgs12    | 0.438624 | 2.36E-05 | 0.000258 |
| Itgb1    | 0.230846 | 2.37E-05 | 0.000259 |
| Lrrc8b   | 0.556649 | 2.40E-05 | 0.000262 |
| Ethe1    | 0.759564 | 2.45E-05 | 0.000267 |
| Marveld1 | 0.520726 | 2.49E-05 | 0.000272 |
| 6430548N | 0.866643 | 2.54E-05 | 0.000277 |
| Amotl2   | 0.384794 | 2.60E-05 | 0.000282 |
| Gm26802  | 1.110442 | 2.64E-05 | 0.000286 |
| Tspan9   | 0.46821  | 2.68E-05 | 0.00029  |
| Tef      | 0.473391 | 2.73E-05 | 0.000295 |
| Ptpn18   | 0.591819 | 2.84E-05 | 0.000306 |
| Csrp2    | 0.295751 | 2.88E-05 | 0.00031  |
| Prdx1    | 0.210101 | 2.98E-05 | 0.00032  |
| Agpat4   | 0.636871 | 3.02E-05 | 0.000324 |
| Nuak2    | 1.363678 | 3.05E-05 | 0.000326 |
| Fkbp2    | 0.388619 | 3.01E-05 | 0.000324 |
| Arhgef7  | 0.479745 | 3.02E-05 | 0.000324 |
| Ube2m    | 0.375379 | 3.07E-05 | 0.000328 |
| Hmgcl    | 0.639464 | 3.13E-05 | 0.000334 |
| A930005H | 0.622688 | 3.21E-05 | 0.000341 |
| Atl3     | 0.380556 | 3.22E-05 | 0.000342 |
| Zfp521   | 0.792579 | 3.26E-05 | 0.000346 |
| Dennd5b  | 0.352842 | 3.33E-05 | 0.000354 |
| Hdgf     | 0.317589 | 3.35E-05 | 0.000355 |
| Sp140    | 0.931349 | 3.40E-05 | 0.000359 |
| Tirap    | 0.626465 | 3.53E-05 | 0.000372 |
| Rab5c    | 0.329165 | 3.53E-05 | 0.000372 |
| Fkbp10   | 0.846328 | 3.58E-05 | 0.000376 |
| Gtf3a    | 0.627849 | 3.59E-05 | 0.000377 |
| Ube2r2   | 0.326271 | 3.59E-05 | 0.000377 |
| C530043K | 0.72411  | 3.65E-05 | 0.000383 |
| Gm14964  | 0.932135 | 3.75E-05 | 0.000393 |
| Glipr2   | 1.340538 | 3.77E-05 | 0.000395 |
| Ubb      | 0.172974 | 3.79E-05 | 0.000397 |
| Sesn1    | 0.408187 | 3.94E-05 | 0.00041  |
| Bhlhb9   | 0.73607  | 3.98E-05 | 0.000415 |
| Nceh1    | 0.525341 | 4.02E-05 | 0.000419 |
| Txndc5   | 0.708967 | 4.20E-05 | 0.000436 |
| Babam2   | 0.534401 | 4.21E-05 | 0.000437 |
| Ctdsp2   | 0.323729 | 4.32E-05 | 0.000447 |
| Hmox1    | 1.280931 | 4.49E-05 | 0.000464 |
| Tcta     | 0.72363  | 4.53E-05 | 0.000467 |
| Ano6     | 0.409869 | 4.62E-05 | 0.000476 |
| Tns2     | 0.310038 | 4.71E-05 | 0.000485 |
| Tgfb1    | 1.38601  | 4.83E-05 | 0.000496 |
| Pcdh7    | 2.753577 | 4.92E-05 | 0.000505 |

|          |          |          |          |
|----------|----------|----------|----------|
| Cacna1e  | 1.424247 | 4.93E-05 | 0.000505 |
| Shisa5   | 0.35052  | 4.96E-05 | 0.000508 |
| Pros1    | 0.400585 | 5.03E-05 | 0.000515 |
| Gdi2     | 0.275861 | 5.09E-05 | 0.000521 |
| Eif3m    | 0.335714 | 5.11E-05 | 0.000523 |
| Tprn     | 1.164742 | 5.27E-05 | 0.000538 |
| Ddx3x    | 0.258463 | 5.25E-05 | 0.000536 |
| Cmtm6    | 0.372817 | 5.37E-05 | 0.000547 |
| Skap2    | 0.880467 | 5.54E-05 | 0.000563 |
| Tspan17  | 0.474726 | 5.91E-05 | 0.000597 |
| Zfp36l1  | 0.195976 | 5.90E-05 | 0.000596 |
| Idh1     | 0.559864 | 6.38E-05 | 0.000641 |
| Arsa     | 0.846879 | 6.65E-05 | 0.000667 |
| H13      | 0.432115 | 6.73E-05 | 0.000674 |
| Edf1     | 0.264062 | 6.88E-05 | 0.000688 |
| Slc38a2  | 0.276797 | 6.93E-05 | 0.000692 |
| Fbxo3    | 0.412078 | 7.16E-05 | 0.000714 |
| Sbf2     | 0.354196 | 7.25E-05 | 0.000722 |
| Relb     | 0.756387 | 7.32E-05 | 0.000728 |
| Zfp217   | 0.871586 | 7.45E-05 | 0.000739 |
| M6pr     | 0.375717 | 7.47E-05 | 0.000741 |
| Lgalsl   | 0.355778 | 7.56E-05 | 0.000749 |
| Spp1     | 1.719037 | 7.72E-05 | 0.000763 |
| Tipin    | 0.543127 | 7.79E-05 | 0.000768 |
| Rtn2     | 1.158545 | 7.91E-05 | 0.000779 |
| Oaz1     | 0.168095 | 7.78E-05 | 0.000768 |
| Per2     | 1.148319 | 8.08E-05 | 0.000793 |
| Ehd4     | 0.378224 | 8.23E-05 | 0.000807 |
| Commd3   | 0.390789 | 8.28E-05 | 0.000811 |
| Il6st    | 0.352704 | 8.41E-05 | 0.000824 |
| 4930523C | 0.368202 | 8.52E-05 | 0.000833 |
| Etfb     | 0.336635 | 8.52E-05 | 0.000833 |
| Bcar1    | 0.539697 | 8.89E-05 | 0.000867 |
| Ldha     | 0.228604 | 8.97E-05 | 0.000874 |
| Htr2a    | 1.256125 | 9.26E-05 | 0.000899 |
| Rnf4     | 0.468014 | 9.22E-05 | 0.000896 |
| Psmb8    | 0.310319 | 9.27E-05 | 0.0009   |
| Selenom  | 0.226052 | 9.38E-05 | 0.000909 |
| Hmox2    | 0.518473 | 9.73E-05 | 0.000939 |
| Aurkaip1 | 0.3432   | 9.73E-05 | 0.000939 |
| Ube2d3   | 0.220481 | 9.72E-05 | 0.000939 |
| Lmf1     | 1.050229 | 0.000101 | 0.00097  |
| Sec61b   | 0.275492 | 0.000103 | 0.000994 |
| Trpv4    | 0.919067 | 0.000104 | 0.001004 |
| 4930556N | 0.91208  | 0.000106 | 0.001014 |
| Atf4     | 0.273661 | 0.000105 | 0.001006 |
| Sema3c   | 0.301329 | 0.000106 | 0.001015 |

|          |          |          |          |
|----------|----------|----------|----------|
| Fscn1    | 1.62258  | 0.000108 | 0.001033 |
| Anp32b   | 0.277597 | 0.000108 | 0.001031 |
| Dusp3    | 0.244039 | 0.00011  | 0.001047 |
| Yy1      | 0.319097 | 0.000111 | 0.001064 |
| 1110038B | 0.770045 | 0.000116 | 0.001107 |
| Pir      | 0.362059 | 0.000117 | 0.001107 |
| Grn      | 0.363399 | 0.000116 | 0.001107 |
| Prr5     | 1.510358 | 0.000119 | 0.001129 |
| Casp12   | 0.674331 | 0.000119 | 0.001129 |
| Tbrg1    | 0.324853 | 0.000119 | 0.001129 |
| Adgrg6   | 1.191245 | 0.000121 | 0.001142 |
| Fndc3b   | 0.416144 | 0.00012  | 0.001131 |
| Nop10    | 0.293176 | 0.00012  | 0.001135 |
| Ddah1    | 0.466625 | 0.000121 | 0.001143 |
| Stom     | 0.34733  | 0.000124 | 0.001166 |
| Rbbp4    | 0.321349 | 0.000124 | 0.001172 |
| Thbd     | 0.330679 | 0.000126 | 0.001189 |
| Lrrc32   | 0.571385 | 0.000127 | 0.001196 |
| Chst14   | 0.936916 | 0.000131 | 0.001235 |
| Ppib     | 0.207942 | 0.000131 | 0.001235 |
| Mt1      | 0.496394 | 0.000134 | 0.001255 |
| Aldh3b1  | 1.258601 | 0.000135 | 0.001262 |
| Ube2i    | 0.301445 | 0.000133 | 0.001251 |
| Tmc7     | 0.607312 | 0.000137 | 0.00128  |
| Enpp2    | 0.763409 | 0.000137 | 0.00128  |
| Pfkfb3   | 0.987621 | 0.000137 | 0.00128  |
| Cmc1     | 0.554475 | 0.000138 | 0.001288 |
| Tmem9    | 0.63679  | 0.000144 | 0.001336 |
| Man1a    | 0.593163 | 0.000145 | 0.001351 |
| Rap2b    | 0.674952 | 0.000146 | 0.001358 |
| Fzd4     | 0.260754 | 0.000146 | 0.001354 |
| Erp29    | 0.334207 | 0.00015  | 0.001385 |
| Wdr89    | 0.694862 | 0.000151 | 0.001391 |
| Eef1d    | 0.246331 | 0.000152 | 0.001401 |
| Calcr1   | 0.399027 | 0.000153 | 0.001414 |
| Arid3a   | 0.912375 | 0.000156 | 0.001436 |
| Zc3h6    | 0.551473 | 0.000162 | 0.00148  |
| Kazald1  | 0.876038 | 0.000169 | 0.001547 |
| Gpr4     | 0.42392  | 0.000169 | 0.001547 |
| Ddi2     | 0.408638 | 0.00017  | 0.001548 |
| Cdc42ep5 | 0.619298 | 0.000173 | 0.00158  |
| Erf      | 0.46636  | 0.000173 | 0.001575 |
| Wbp1l    | 0.448413 | 0.000176 | 0.0016   |
| Asxl1    | 0.513948 | 0.000176 | 0.001601 |
| Pgls     | 0.380051 | 0.000177 | 0.001601 |
| Usp3     | 0.512615 | 0.000177 | 0.001606 |
| Cdk6     | 0.749694 | 0.000178 | 0.001614 |

|           |          |          |          |
|-----------|----------|----------|----------|
| Ypel2     | 0.49844  | 0.000182 | 0.001641 |
| Serp1     | 0.42286  | 0.000188 | 0.001691 |
| Slk       | 0.291178 | 0.000188 | 0.001691 |
| Pld3      | 0.629263 | 0.00019  | 0.001709 |
| Gimap8    | 0.553843 | 0.000195 | 0.001747 |
| Gm9616    | 0.843664 | 0.000198 | 0.001774 |
| Hnrnpa1   | 0.279484 | 0.000197 | 0.001765 |
| Oxa1l     | 0.511568 | 0.0002   | 0.001784 |
| Ece1      | 0.210687 | 0.0002   | 0.001789 |
| Dpm3      | 0.252283 | 0.000202 | 0.001801 |
| Ywhah     | 0.251822 | 0.000202 | 0.001802 |
| Ccdc71l   | 0.572477 | 0.000203 | 0.00181  |
| Prr14     | 0.491654 | 0.000204 | 0.001817 |
| Ralgds    | 0.613966 | 0.000205 | 0.00182  |
| Naprt     | 1.14721  | 0.000206 | 0.001831 |
| Adamts4   | 1.421259 | 0.000206 | 0.001831 |
| Atraid    | 0.303143 | 0.000205 | 0.00182  |
| Hsd17b4   | 0.46353  | 0.000209 | 0.001849 |
| Itga1     | 0.203652 | 0.000211 | 0.001866 |
| Cd24a     | 0.564705 | 0.000216 | 0.001912 |
| Ppp1r14b  | 0.44813  | 0.000217 | 0.00192  |
| Phf20     | 0.391131 | 0.000218 | 0.001922 |
| Dnajb9    | 0.400072 | 0.000218 | 0.001926 |
| Rtl8a     | 0.342445 | 0.00022  | 0.001942 |
| Hdlbp     | 0.299463 | 0.000226 | 0.001987 |
| Itgb4     | 1.096589 | 0.000232 | 0.002041 |
| Tpt1-ps3  | 0.496692 | 0.000233 | 0.002049 |
| Arl5c     | 1.45436  | 0.000236 | 0.00207  |
| Ski       | 0.274297 | 0.000234 | 0.002054 |
| Unc93b1   | 0.667277 | 0.000238 | 0.002084 |
| Slc36a4   | 0.651669 | 0.000239 | 0.002091 |
| Rnh1      | 0.354681 | 0.000239 | 0.002089 |
| Ace       | 1.337373 | 0.000244 | 0.002129 |
| Arf5      | 0.236477 | 0.000243 | 0.002119 |
| Rbbp7     | 0.316763 | 0.000246 | 0.002142 |
| Cry2      | 0.664875 | 0.000248 | 0.002159 |
| Rb1       | 0.441754 | 0.00025  | 0.002173 |
| Epb41l4ao | 0.547526 | 0.00025  | 0.002173 |
| Abcb1b    | 1.963987 | 0.000253 | 0.002197 |
| Srp72     | 0.350385 | 0.000251 | 0.002182 |
| Rab34     | 0.762272 | 0.000252 | 0.002188 |
| Cpt1a     | 0.319056 | 0.000252 | 0.002188 |
| Pisd      | 0.569608 | 0.000254 | 0.002198 |
| Fam76a    | 0.308517 | 0.000256 | 0.002215 |
| Tubb6     | 0.939761 | 0.000262 | 0.002254 |
| Cmpk1     | 0.347797 | 0.00026  | 0.002244 |
| Nfam1     | 2.804634 | 0.000265 | 0.002278 |



|          |          |          |          |
|----------|----------|----------|----------|
| Bcl6     | 0.742901 | 0.000262 | 0.002258 |
| Tle5     | 0.197209 | 0.000269 | 0.002313 |
| S100a16  | 0.262267 | 0.000272 | 0.002332 |
| Ctnna1   | 0.211969 | 0.000273 | 0.002334 |
| Gm9794   | 0.668126 | 0.000288 | 0.002452 |
| Lrrc41   | 0.526515 | 0.000289 | 0.002465 |
| 2700046A | 1.392692 | 0.000295 | 0.002508 |
| Irak2    | 0.573563 | 0.000302 | 0.002561 |
| Zfp422   | 0.438304 | 0.000308 | 0.002606 |
| Ppp1r13l | 1.936214 | 0.000323 | 0.002723 |
| Gm17501  | 0.975241 | 0.000323 | 0.002723 |
| Ampd3    | 0.913027 | 0.000329 | 0.00277  |
| Anapc16  | 0.308885 | 0.000328 | 0.002763 |
| Hmbs     | 0.803351 | 0.000332 | 0.002795 |
| Ephb4    | 0.39953  | 0.000332 | 0.002789 |
| Tal1     | 0.559323 | 0.000335 | 0.002811 |
| 1500011B | 0.504629 | 0.000335 | 0.002811 |
| Xpa      | 0.52141  | 0.000337 | 0.002821 |
| Resf1    | 0.385641 | 0.000339 | 0.002841 |
| Tmem256  | 0.264696 | 0.000343 | 0.002871 |
| Fblim1   | 0.912384 | 0.000349 | 0.002916 |
| Mpp2     | 0.793911 | 0.000354 | 0.002951 |
| Igsf8    | 0.687935 | 0.000366 | 0.003044 |
| Gsdmd    | 0.589071 | 0.000368 | 0.003052 |
| Lmna     | 0.292389 | 0.000367 | 0.003052 |
| Plpp6    | 0.406662 | 0.000368 | 0.003057 |
| Dynlt3   | 0.297112 | 0.000369 | 0.003061 |
| Tbca     | 0.257314 | 0.00038  | 0.003148 |
| Gimap9   | 0.668057 | 0.000385 | 0.003183 |
| Mpg      | 0.576687 | 0.000388 | 0.003205 |
| Psmb1    | 0.223205 | 0.000387 | 0.003202 |
| Ctbs     | 0.674284 | 0.000397 | 0.003266 |
| Pcmt1    | 0.201004 | 0.000397 | 0.003266 |
| Tspan12  | 0.378219 | 0.000406 | 0.003332 |
| Abhd6    | 0.524933 | 0.000406 | 0.003334 |
| Zfp46    | 0.663032 | 0.000409 | 0.003351 |
| Degs2    | 0.306035 | 0.000407 | 0.003343 |
| Kyat1    | 1.141651 | 0.000413 | 0.003386 |
| Glud1    | 0.287245 | 0.00042  | 0.003438 |
| Btg1     | 0.241488 | 0.000426 | 0.00348  |
| Ccdc152  | 0.764352 | 0.00043  | 0.003511 |
| Serpine2 | 0.608363 | 0.000435 | 0.003543 |
| Emc10    | 0.328376 | 0.000434 | 0.003543 |
| Pitpna   | 0.267764 | 0.00044  | 0.003587 |
| Tmem219  | 0.541254 | 0.00045  | 0.003657 |
| Sh3tc1   | 0.608489 | 0.00045  | 0.003657 |
| Tead2    | 0.544203 | 0.000461 | 0.003739 |

|           |          |          |          |
|-----------|----------|----------|----------|
| Psmg4     | 0.384325 | 0.000463 | 0.003751 |
| Sema3f    | 0.718744 | 0.000467 | 0.003775 |
| Sertad3   | 0.673703 | 0.000469 | 0.00379  |
| Ace2      | 0.56876  | 0.000473 | 0.003816 |
| Fxyd7     | 1.012741 | 0.000479 | 0.003857 |
| Khk       | 0.571341 | 0.000477 | 0.003845 |
| Thnsl2    | 1.3374   | 0.000488 | 0.003925 |
| 2310009B  | 0.583057 | 0.000493 | 0.003961 |
| Hnrnpul1  | 0.333273 | 0.000496 | 0.003978 |
| Mecp2     | 0.313167 | 0.000496 | 0.003978 |
| Tnfsf10   | 0.361762 | 0.000504 | 0.004043 |
| Phf23     | 0.471677 | 0.00051  | 0.00408  |
| Reep1     | 0.704626 | 0.000511 | 0.004085 |
| Cpm       | 0.588873 | 0.000514 | 0.004104 |
| Tmie      | 1.058808 | 0.000531 | 0.004234 |
| Lyz2      | 2.097838 | 0.000538 | 0.004286 |
| Dazap2    | 0.242627 | 0.000534 | 0.004259 |
| Irf2      | 0.279034 | 0.000547 | 0.004355 |
| Ripk1     | 0.473115 | 0.000556 | 0.004423 |
| Ddost     | 0.351051 | 0.000559 | 0.004437 |
| Dnajc3    | 0.248178 | 0.000563 | 0.004472 |
| Ybx3      | 0.232582 | 0.000569 | 0.004517 |
| Mknk2     | 0.38648  | 0.000581 | 0.004603 |
| Sil1      | 0.587221 | 0.000589 | 0.004655 |
| Cpne3     | 0.29182  | 0.00059  | 0.004661 |
| H2-Aa     | 1.31728  | 0.000608 | 0.004782 |
| Cchcr1    | 1.19589  | 0.00062  | 0.004871 |
| Ost4      | 0.230636 | 0.000617 | 0.004847 |
| Wee1      | 0.677059 | 0.000623 | 0.00488  |
| Rps23-ps1 | 0.562163 | 0.000622 | 0.00488  |
| Prdx5     | 0.285912 | 0.000621 | 0.004872 |
| Exoc3l    | 1.363312 | 0.000639 | 0.00499  |
| Anxa11    | 0.375001 | 0.000642 | 0.00501  |
| Uck2      | 1.061614 | 0.00066  | 0.005135 |
| Rad50     | 0.502414 | 0.000669 | 0.005192 |
| Arfgap3   | 0.48326  | 0.000674 | 0.005232 |
| Pcdhgc3   | 1.571689 | 0.000682 | 0.005281 |
| Denr      | 0.310581 | 0.000694 | 0.00536  |
| Ifrd1     | 0.388789 | 0.000703 | 0.005425 |
| Agps      | 0.517628 | 0.000706 | 0.005438 |
| Sec14l1   | 0.281059 | 0.000706 | 0.005438 |
| Polr1d    | 0.266046 | 0.000725 | 0.005575 |
| Pgm2l1    | 0.41484  | 0.000736 | 0.00565  |
| Vrk2      | 1.024251 | 0.00074  | 0.005679 |
| Gm9385    | 1.020518 | 0.000745 | 0.005712 |
| Vwa8      | 0.608548 | 0.000748 | 0.005731 |
| Get4      | 0.442385 | 0.000749 | 0.005739 |

|           |          |          |          |
|-----------|----------|----------|----------|
| Eif5a     | 0.232687 | 0.000767 | 0.00586  |
| Sars      | 0.353078 | 0.000772 | 0.005896 |
| Eef1g     | 0.218466 | 0.000774 | 0.005904 |
| Gabpb1    | 0.475538 | 0.000779 | 0.005941 |
| Mapk9     | 0.430715 | 0.000781 | 0.005957 |
| Mtus1     | 0.209215 | 0.000786 | 0.005986 |
| P2ry1     | 1.520008 | 0.000798 | 0.006062 |
| Kri1      | 0.699257 | 0.000796 | 0.006056 |
| Tsr3      | 0.565193 | 0.000796 | 0.006056 |
| Slc35g2   | 1.045476 | 0.000808 | 0.006127 |
| Smpdl3a   | 0.268734 | 0.000805 | 0.006109 |
| Plp2      | 0.774445 | 0.000813 | 0.006159 |
| Reep5     | 0.249594 | 0.000812 | 0.006154 |
| Ppp2r5c   | 0.262079 | 0.000821 | 0.006212 |
| Tmem123   | 0.254305 | 0.000833 | 0.006299 |
| Dguok     | 0.345773 | 0.000835 | 0.00631  |
| Npm1      | 0.201186 | 0.000838 | 0.006329 |
| Acox1     | 0.329779 | 0.00084  | 0.006337 |
| Emc6      | 0.331055 | 0.000846 | 0.006379 |
| Ppp2r2a   | 0.29292  | 0.000846 | 0.006379 |
| Pgm5      | 0.403578 | 0.000857 | 0.006457 |
| Tmem64    | 0.533984 | 0.000859 | 0.006471 |
| Tmem178   | 2.241038 | 0.000873 | 0.006556 |
| Pf4       | 1.532438 | 0.000872 | 0.006554 |
| Glul      | 0.183634 | 0.000872 | 0.006555 |
| Tmem254i  | 0.653014 | 0.000891 | 0.006673 |
| Lsm14a    | 0.296878 | 0.00089  | 0.006673 |
| Cthrc1    | 0.335636 | 0.000902 | 0.006755 |
| Hnrnph2   | 0.306683 | 0.000902 | 0.006755 |
| Gmfg      | 2.315939 | 0.000916 | 0.006847 |
| Elmo1     | 0.425752 | 0.000918 | 0.006852 |
| E030026E  | 1.365759 | 0.000926 | 0.00691  |
| Hnrnpf    | 0.183807 | 0.000929 | 0.006927 |
| Hacd4     | 1.1201   | 0.000939 | 0.006992 |
| Jpt1      | 0.561853 | 0.000948 | 0.007052 |
| Cast      | 0.24434  | 0.000953 | 0.007079 |
| Hyal2     | 0.446558 | 0.000994 | 0.007371 |
| Zbtb11os1 | 0.9073   | 0.001025 | 0.007575 |
| Rasd2     | 1.244412 | 0.001031 | 0.007609 |
| Csde1     | 0.172964 | 0.001025 | 0.007575 |
| Rps11-ps1 | 0.65261  | 0.001039 | 0.007653 |
| Tsen34    | 0.31619  | 0.001039 | 0.007653 |
| Gm49599   | 0.422907 | 0.001045 | 0.007686 |
| Retreg2   | 0.376163 | 0.001046 | 0.00769  |
| Gm6937    | 0.841103 | 0.00105  | 0.00772  |
| Sh3bgrl2  | 0.646317 | 0.001058 | 0.007773 |
| Pgm2      | 0.570904 | 0.001063 | 0.007797 |

|          |          |          |          |
|----------|----------|----------|----------|
| Rap1a    | 0.225894 | 0.001061 | 0.00779  |
| Kank1    | 0.513877 | 0.00109  | 0.007973 |
| Rab3d    | 0.563259 | 0.001088 | 0.007969 |
| Miip     | 0.713247 | 0.001092 | 0.007989 |
| Pdxdc1   | 0.371874 | 0.001102 | 0.008045 |
| Tomm7    | 0.187068 | 0.001099 | 0.008038 |
| Fuca1    | 0.393128 | 0.001104 | 0.008058 |
| Sqor     | 0.507775 | 0.001107 | 0.008074 |
| Ubald1   | 0.491754 | 0.001117 | 0.008126 |
| Sh3bp4   | 0.342299 | 0.001119 | 0.008136 |
| Zfand1   | 0.75956  | 0.001128 | 0.008187 |
| Foxo1    | 0.293467 | 0.001132 | 0.008209 |
| Pik3c2a  | 0.264871 | 0.001138 | 0.008253 |
| Figl2    | 0.825888 | 0.001142 | 0.008273 |
| Hipk3    | 0.268655 | 0.001145 | 0.008292 |
| Pcbd2    | 0.371372 | 0.00115  | 0.008318 |
| Smpd1    | 0.451444 | 0.001156 | 0.008356 |
| Maml3    | 0.588774 | 0.001163 | 0.008394 |
| Arf2     | 0.383339 | 0.001175 | 0.00846  |
| A930033H | 0.740276 | 0.001182 | 0.008496 |
| Cox4i1   | 0.133464 | 0.001174 | 0.008453 |
| Zfp593   | 0.753877 | 0.001195 | 0.008571 |
| Palm     | 0.267702 | 0.001223 | 0.008763 |
| Pla1a    | 0.667201 | 0.001236 | 0.008846 |
| Rhod     | 0.685668 | 0.001237 | 0.00885  |
| Map2k3   | 0.411474 | 0.001236 | 0.008846 |
| Rpl3-ps1 | 0.762753 | 0.001241 | 0.008872 |
| Mapk11   | 0.903488 | 0.001243 | 0.008879 |
| Kif23    | 0.878002 | 0.001248 | 0.008899 |
| Tpst2    | 0.343235 | 0.001246 | 0.008891 |
| Hebp1    | 0.325918 | 0.001265 | 0.009001 |
| H2-K2    | 0.836278 | 0.001272 | 0.009045 |
| Trappc1  | 0.419655 | 0.001286 | 0.009123 |
| Pdcd6    | 0.276633 | 0.001285 | 0.009119 |
| Endog    | 0.563632 | 0.001287 | 0.009128 |
| Ctif     | 0.542161 | 0.001293 | 0.009159 |
| Gna13    | 0.296098 | 0.001292 | 0.009159 |
| Plac9a   | 0.324062 | 0.0013   | 0.009201 |
| Gm17745  | 0.877409 | 0.001322 | 0.009347 |
| B4galt5  | 0.700373 | 0.001324 | 0.009353 |
| Tmem248  | 0.447674 | 0.001324 | 0.009353 |
| Suz12    | 0.286313 | 0.001341 | 0.009455 |
| Map3k14  | 1.326675 | 0.001356 | 0.009549 |
| Rnf115   | 0.394168 | 0.001373 | 0.009653 |
| Mpst     | 0.700932 | 0.001381 | 0.009704 |
| Kcmf1    | 0.30172  | 0.001379 | 0.009696 |
| Per3     | 0.421801 | 0.001385 | 0.00972  |

|          |          |          |          |
|----------|----------|----------|----------|
| Romo1    | 0.238203 | 0.001385 | 0.00972  |
| Rilp     | 1.02906  | 0.001393 | 0.00977  |
| Acadvl   | 0.387771 | 0.001398 | 0.0098   |
| Naga     | 0.674324 | 0.001416 | 0.009891 |
| Fcer1g   | 1.763925 | 0.001426 | 0.009939 |
| Rps6ka1  | 0.615305 | 0.001423 | 0.009928 |
| Hscb     | 0.668109 | 0.001423 | 0.009928 |
| Marveld2 | 0.905723 | 0.001426 | 0.009939 |
| Pgap2    | 0.526823 | 0.001453 | 0.01011  |
| Spef1    | 0.723953 | 0.001461 | 0.010152 |
| Arhgdia  | 0.189895 | 0.001459 | 0.010144 |
| Kdelr3   | 1.533684 | 0.001475 | 0.010219 |
| Ndufa7   | 0.164929 | 0.001464 | 0.010168 |
| Eif2s2   | 0.197729 | 0.001466 | 0.010168 |
| Gtf2b    | 0.395872 | 0.001481 | 0.010259 |
| Rit1     | 0.374933 | 0.001488 | 0.010291 |
| Tmem51   | 0.454721 | 0.001512 | 0.01043  |
| Irak4    | 0.812054 | 0.001518 | 0.010456 |
| Fbxl5    | 0.298543 | 0.001525 | 0.010494 |
| Mapk1    | 0.284992 | 0.001527 | 0.010505 |
| Rpn2     | 0.242525 | 0.001541 | 0.010586 |
| Rwdd2a   | 1.359381 | 0.001555 | 0.010662 |
| Emc9     | 0.601178 | 0.001559 | 0.010686 |
| Sft2d2   | 0.360801 | 0.001571 | 0.01076  |
| Micos13  | 0.247792 | 0.001585 | 0.010846 |
| Zbed3    | 0.502438 | 0.001613 | 0.011021 |
| Ppp3cc   | 0.427711 | 0.001622 | 0.011079 |
| Cox7c    | 0.164574 | 0.001623 | 0.011079 |
| Stx12    | 0.269133 | 0.001629 | 0.011109 |
| Ang      | 0.726883 | 0.001638 | 0.011167 |
| Pygl     | 1.067627 | 0.001641 | 0.01118  |
| Trib3    | 0.938886 | 0.001644 | 0.011186 |
| Pcbp2    | 0.149793 | 0.001641 | 0.01118  |
| Atp6v1g1 | 0.191749 | 0.001645 | 0.011186 |
| Spsb1    | 0.575838 | 0.001666 | 0.011305 |
| Odc1     | 0.535365 | 0.001664 | 0.011301 |
| Sharpin  | 0.466593 | 0.001685 | 0.011424 |
| Baz1a    | 0.622618 | 0.001708 | 0.011553 |
| Cox8a    | 0.139707 | 0.001699 | 0.011507 |
| Ntan1    | 0.290481 | 0.001719 | 0.011627 |
| Hddc2    | 0.553794 | 0.00173  | 0.011675 |
| Cd151    | 0.224182 | 0.00173  | 0.011675 |
| Gm43672  | 1.566976 | 0.001752 | 0.011804 |
| Saraf    | 0.246999 | 0.001771 | 0.011915 |
| Rabepk   | 0.603289 | 0.001798 | 0.012075 |
| Prrg2    | 0.513146 | 0.001804 | 0.012114 |
| Tmtc1    | 0.37911  | 0.001805 | 0.012114 |

|          |          |          |          |
|----------|----------|----------|----------|
| Dapk1    | 0.708488 | 0.001817 | 0.012191 |
| Snrpe    | 0.218361 | 0.001827 | 0.012249 |
| Dcaf5    | 0.488412 | 0.001835 | 0.012284 |
| Tle3     | 0.373731 | 0.001833 | 0.012281 |
| Tmed3    | 0.348079 | 0.00184  | 0.012317 |
| Tcf7l2   | 0.362142 | 0.001843 | 0.012321 |
| Ube2e1   | 0.350907 | 0.001851 | 0.012365 |
| Slc52a2  | 0.408407 | 0.001872 | 0.012493 |
| Slc25a20 | 0.535546 | 0.001877 | 0.012522 |
| Ly6g6d   | 1.905691 | 0.001905 | 0.012687 |
| Wipf3    | 1.205951 | 0.001937 | 0.01287  |
| Ccdc8    | 0.961442 | 0.001935 | 0.012861 |
| Npw      | 0.988767 | 0.00194  | 0.012878 |
| 4930515G | 2.61564  | 0.001984 | 0.013149 |
| Mustn1   | 0.537792 | 0.002015 | 0.013339 |
| Phc2     | 0.2868   | 0.00202  | 0.013355 |
| Tcaf2    | 0.856565 | 0.002045 | 0.01352  |
| Trim3    | 0.525232 | 0.002054 | 0.01357  |
| Magi1    | 0.518442 | 0.002063 | 0.013614 |
| Zfand3   | 0.302653 | 0.002061 | 0.013608 |
| Chid1    | 0.932052 | 0.002085 | 0.013742 |
| Galk1    | 0.409816 | 0.002091 | 0.013772 |
| Pcdhga4  | 1.816661 | 0.002111 | 0.013888 |
| Lgals4   | 0.872186 | 0.002107 | 0.013867 |
| Plaur    | 0.934127 | 0.002114 | 0.013903 |
| Man2a1   | 0.388749 | 0.002119 | 0.013914 |
| Csrp1    | 0.306996 | 0.002158 | 0.014158 |
| Slc41a1  | 0.47948  | 0.002191 | 0.014359 |
| Mospd1   | 0.332609 | 0.002221 | 0.014525 |
| Fuca2    | 0.591614 | 0.002224 | 0.014537 |
| Camta1   | 0.335351 | 0.00228  | 0.014865 |
| Arf1     | 0.174342 | 0.002286 | 0.014895 |
| Clec1a   | 0.387931 | 0.002314 | 0.015051 |
| Slc52a3  | 0.368407 | 0.00233  | 0.015143 |
| Tln2     | 0.444916 | 0.002333 | 0.015155 |
| Ptpn12   | 0.305091 | 0.002362 | 0.015316 |
| Dcaf13   | 0.453862 | 0.002376 | 0.01539  |
| Adgrf5   | 0.131656 | 0.002368 | 0.01535  |
| Gm2011   | 1.127917 | 0.002385 | 0.015445 |
| Pdgfd    | 0.45515  | 0.00243  | 0.015689 |
| Dpagt1   | 0.492863 | 0.002455 | 0.015813 |
| Ociad2   | 2.096885 | 0.002475 | 0.015909 |
| Cnppd1   | 0.443104 | 0.002473 | 0.015902 |
| Ccdc71   | 0.522882 | 0.002486 | 0.015953 |
| Atp10d   | 0.304358 | 0.002487 | 0.015956 |
| Ssbp4    | 0.224376 | 0.002495 | 0.015989 |
| Tor3a    | 0.463537 | 0.0025   | 0.016014 |

|           |          |          |          |
|-----------|----------|----------|----------|
| Rab1a     | 0.211793 | 0.002515 | 0.016106 |
| Tmem60    | 0.439086 | 0.00253  | 0.016186 |
| Birc2     | 0.373861 | 0.002569 | 0.016406 |
| Coa8      | 0.354358 | 0.002594 | 0.016539 |
| Npc2      | 0.247072 | 0.002596 | 0.016548 |
| Aig1      | 0.406296 | 0.002607 | 0.016612 |
| 311008211 | 0.744244 | 0.002617 | 0.016649 |
| Trim35    | 0.336851 | 0.00262  | 0.016661 |
| 4933431E  | 1.06075  | 0.002642 | 0.016787 |
| Cdk4      | 0.346239 | 0.002637 | 0.016763 |
| Stap2     | 0.474082 | 0.002653 | 0.016848 |
| Rnf185    | 0.500626 | 0.002657 | 0.016866 |
| Bzw1      | 0.237614 | 0.002692 | 0.017057 |
| Hfe       | 0.494667 | 0.002707 | 0.017129 |
| Dgkh      | 0.29781  | 0.00272  | 0.017202 |
| Arl2      | 0.35491  | 0.002725 | 0.017218 |
| 3010003L  | 1.011723 | 0.002737 | 0.017278 |
| Tmem14c   | 0.253957 | 0.002764 | 0.017412 |
| Gm9843    | 0.512348 | 0.002771 | 0.017437 |
| Rab2a     | 0.186015 | 0.002817 | 0.017671 |
| Tmed5     | 0.259022 | 0.002825 | 0.017702 |
| Rhobtb1   | 0.319466 | 0.002862 | 0.017906 |
| Cept1     | 0.340536 | 0.002878 | 0.017989 |
| Tnfrsf10b | 0.829615 | 0.002893 | 0.018078 |
| Plxna4    | 1.003704 | 0.002912 | 0.018171 |
| Pcna      | 0.329043 | 0.00291  | 0.018168 |
| Nfkbie    | 1.800214 | 0.002937 | 0.018292 |
| Lrrc28    | 1.005436 | 0.002934 | 0.018281 |
| Mfsd13a   | 1.170628 | 0.002987 | 0.018535 |
| Nptn      | 0.237357 | 0.002973 | 0.018468 |
| Stx17     | 0.440836 | 0.002984 | 0.018522 |
| Slc16a3   | 0.892701 | 0.002991 | 0.018551 |
| Trp53inp1 | 0.430689 | 0.003012 | 0.018658 |
| Sfr1      | 0.212552 | 0.003035 | 0.018785 |
| Tut4      | 0.268418 | 0.003046 | 0.018844 |
| Cdkn2c    | 0.55595  | 0.003087 | 0.019073 |
| Ptpn3     | 2.680214 | 0.003118 | 0.019224 |
| Naglu     | 0.782867 | 0.003108 | 0.019182 |
| Nupr1     | 0.503418 | 0.003106 | 0.019179 |
| Ly96      | 1.00716  | 0.003133 | 0.019312 |
| Selenok   | 0.163172 | 0.00315  | 0.019406 |
| Rabac1    | 0.139587 | 0.003153 | 0.019418 |
| Rph3al    | 0.849768 | 0.003187 | 0.019585 |
| Efnb1     | 0.409529 | 0.003185 | 0.019585 |
| Fam104a   | 0.254918 | 0.003182 | 0.019583 |
| Cox6a1    | 0.172664 | 0.003181 | 0.019582 |
| Mapk12    | 0.389624 | 0.003225 | 0.019788 |

|           |          |          |          |
|-----------|----------|----------|----------|
| Zfp787    | 0.400375 | 0.003233 | 0.019819 |
| CltA      | 0.178979 | 0.003247 | 0.019891 |
| Zfp467    | 0.430859 | 0.003257 | 0.019926 |
| Ttc19     | 0.392014 | 0.003256 | 0.019926 |
| Socs5     | 0.350678 | 0.003288 | 0.020092 |
| Tmem88    | 0.460635 | 0.003326 | 0.020275 |
| Cish      | 0.893766 | 0.003348 | 0.020374 |
| Psmd4     | 0.216551 | 0.00334  | 0.020352 |
| Polr2i    | 0.278533 | 0.003345 | 0.020374 |
| Extl2     | 0.786245 | 0.003362 | 0.020443 |
| L3hypdh   | 0.730566 | 0.003371 | 0.020493 |
| Htatip2   | 0.681544 | 0.003377 | 0.020513 |
| Acadsb    | 0.406793 | 0.003411 | 0.020625 |
| Sntb2     | 0.309399 | 0.003409 | 0.020625 |
| Baiap3    | 0.86253  | 0.003426 | 0.020685 |
| Nudt16    | 0.702704 | 0.003424 | 0.020678 |
| Gm13436   | 1.44461  | 0.003437 | 0.020733 |
| 1110004F  | 0.243024 | 0.003434 | 0.020725 |
| Gm37101   | 1.028503 | 0.003453 | 0.020794 |
| Hectd1    | 0.196373 | 0.003452 | 0.020794 |
| Ppp5c     | 0.445683 | 0.003469 | 0.020885 |
| Efh2      | 0.321762 | 0.003494 | 0.020992 |
| Slc12a2   | 0.297354 | 0.003549 | 0.021308 |
| Rab13     | 0.358802 | 0.003554 | 0.021325 |
| Tmem59    | 0.151171 | 0.003564 | 0.02137  |
| 1700037H  | 0.737471 | 0.003579 | 0.021431 |
| Klhdc8b   | 0.435347 | 0.003587 | 0.02147  |
| Rpl10-ps3 | 0.919848 | 0.003628 | 0.021692 |
| Snn       | 0.416954 | 0.00373  | 0.022233 |
| Dhrs7     | 0.278406 | 0.003733 | 0.022236 |
| Capn2     | 0.242961 | 0.003748 | 0.022275 |
| Gm43149   | 1.26168  | 0.003829 | 0.022676 |
| Fkbp11    | 1.159568 | 0.003827 | 0.022673 |
| Klhl24    | 0.220444 | 0.003825 | 0.022673 |
| Cbx4      | 0.576235 | 0.003865 | 0.022844 |
| Cables1   | 0.821038 | 0.003871 | 0.022871 |
| Fbxo34    | 0.605283 | 0.003874 | 0.022877 |
| Fes       | 0.55654  | 0.003887 | 0.022946 |
| Irx3      | 0.237102 | 0.003902 | 0.023009 |
| Abcc1     | 0.665864 | 0.003918 | 0.023084 |
| Rpl15-ps2 | 1.540431 | 0.003975 | 0.023373 |
| Ctdnep1   | 0.339316 | 0.003991 | 0.023451 |
| Raly      | 0.205304 | 0.004011 | 0.02356  |
| Maoa      | 0.18516  | 0.004013 | 0.023565 |
| Foxf2     | 0.201629 | 0.004029 | 0.023647 |
| Srrm2     | 0.146368 | 0.004032 | 0.023657 |
| Sgf29     | 0.559491 | 0.004116 | 0.02409  |



|           |          |          |          |
|-----------|----------|----------|----------|
| Elov16    | 0.995526 | 0.004161 | 0.024308 |
| Uap1l1    | 0.804952 | 0.00417  | 0.024348 |
| Ifngr1    | 0.281398 | 0.004183 | 0.024414 |
| Polm      | 1.37645  | 0.00423  | 0.024655 |
| Luc7l2    | 0.161172 | 0.00421  | 0.024566 |
| Polr2h    | 0.488974 | 0.004235 | 0.024669 |
| Rps10-ps1 | 0.497095 | 0.004268 | 0.024844 |
| Spats2    | 0.453565 | 0.004273 | 0.024864 |
| Vwa5a     | 0.40393  | 0.004287 | 0.024909 |
| Chchd5    | 0.5818   | 0.004293 | 0.024925 |
| Zbtb8a    | 0.883469 | 0.004312 | 0.025022 |
| Kxd1      | 0.36672  | 0.004333 | 0.025124 |
| Wbp2      | 0.245233 | 0.004336 | 0.025129 |
| Utp3      | 0.305635 | 0.004348 | 0.025185 |
| Cybb      | 3.667318 | 0.004413 | 0.025469 |
| Cerk      | 0.434243 | 0.004382 | 0.025351 |
| Rps6-ps4  | 0.617771 | 0.004406 | 0.02544  |
| H2-Eb1    | 1.309478 | 0.004417 | 0.025469 |
| Efemp2    | 0.391658 | 0.004424 | 0.025488 |
| 4931406C  | 0.461692 | 0.004432 | 0.025523 |
| Cd59b     | 1.638665 | 0.004464 | 0.025644 |
| Rnf2      | 0.461196 | 0.004446 | 0.025574 |
| Phlda3    | 0.970121 | 0.004462 | 0.025644 |
| Tox4      | 0.31895  | 0.004463 | 0.025644 |
| Mettl9    | 0.287204 | 0.004467 | 0.025656 |
| Rgp1      | 0.67957  | 0.00448  | 0.025719 |
| Osbp19    | 0.219636 | 0.004495 | 0.025797 |
| Ezh2      | 0.608059 | 0.004554 | 0.026096 |
| Manbal    | 0.393899 | 0.004553 | 0.026095 |
| Rffl      | 0.713971 | 0.004577 | 0.026197 |
| Fli1      | 0.177711 | 0.004566 | 0.026151 |
| Endou     | 0.904488 | 0.004626 | 0.026448 |
| Tpbgl     | 1.432255 | 0.004644 | 0.026529 |
| Ripply3   | 0.738372 | 0.004635 | 0.026489 |
| Ncaph     | 1.001285 | 0.004654 | 0.026565 |
| Vps37c    | 0.544907 | 0.004649 | 0.026547 |
| Ccni      | 0.227255 | 0.004665 | 0.026608 |
| Clk3      | 0.472259 | 0.004681 | 0.026668 |
| Gm21955   | 1.582773 | 0.004708 | 0.026778 |
| Fam160a1  | 0.884875 | 0.004712 | 0.026781 |
| Prkce     | 0.396579 | 0.004709 | 0.026778 |
| Hcls1     | 0.994096 | 0.00472  | 0.026818 |
| Gm38125   | 0.647888 | 0.004726 | 0.026833 |
| Pik3r5    | 1.273394 | 0.004756 | 0.026974 |
| Svil      | 0.271713 | 0.004772 | 0.027048 |
| Nisch     | 0.200075 | 0.004773 | 0.027048 |
| Gm9889    | 0.762121 | 0.004795 | 0.027153 |

|           |          |          |          |
|-----------|----------|----------|----------|
| Cltc      | 0.180461 | 0.004785 | 0.027103 |
| Gdpd1     | 0.505932 | 0.004823 | 0.027297 |
| Plod1     | 0.326794 | 0.004824 | 0.027297 |
| Ralgapa2  | 0.565568 | 0.004863 | 0.027487 |
| Klf10     | 0.316002 | 0.004873 | 0.02753  |
| Gspt1     | 0.252091 | 0.004877 | 0.027541 |
| Rps11-ps2 | 0.938556 | 0.004895 | 0.027612 |
| Nudt14    | 0.38111  | 0.004912 | 0.0277   |
| Timeless  | 0.532223 | 0.004934 | 0.027791 |
| Mid1      | 0.560763 | 0.004939 | 0.02781  |
| Pdia6     | 0.268828 | 0.005005 | 0.028139 |
| Apbb2     | 0.173863 | 0.005063 | 0.028456 |
| Psma7     | 0.162806 | 0.005077 | 0.028501 |
| Hras      | 0.288194 | 0.005171 | 0.028973 |
| Sos1      | 0.266856 | 0.005184 | 0.029025 |
| Caskin2   | 0.286128 | 0.005194 | 0.029071 |
| Ube2a     | 0.35826  | 0.005248 | 0.02935  |
| Sav1      | 0.287922 | 0.005271 | 0.029454 |
| Cdk2ap1   | 0.361179 | 0.005281 | 0.029493 |
| Plin3     | 0.340007 | 0.005293 | 0.029549 |
| Surf4     | 0.289175 | 0.005301 | 0.029579 |
| Atp6v1f   | 0.184389 | 0.005361 | 0.029869 |
| Cdca7     | 0.718364 | 0.005376 | 0.029923 |
| Fam241a   | 0.389459 | 0.005399 | 0.030028 |
| Psен2     | 0.426293 | 0.005411 | 0.030073 |
| H6pd      | 0.654252 | 0.005437 | 0.030177 |
| Msrб1     | 0.415331 | 0.005438 | 0.030177 |
| Cep85     | 0.612825 | 0.005446 | 0.030211 |
| Zdhhc12   | 0.55287  | 0.005461 | 0.03027  |
| Yipf3     | 0.33387  | 0.005483 | 0.030369 |
| Atp5mpl   | 0.194724 | 0.005594 | 0.030906 |
| Tiparp    | 0.417604 | 0.005609 | 0.030976 |
| Smap2     | 0.377411 | 0.005628 | 0.031071 |
| Rps27a-ps | 0.600053 | 0.005659 | 0.031197 |
| Pnrc1     | 0.179849 | 0.005677 | 0.031282 |
| 4921524J1 | 0.287107 | 0.005706 | 0.031432 |
| Irak3     | 0.68677  | 0.005746 | 0.031619 |
| Rps27l    | 0.182675 | 0.005799 | 0.03186  |
| Il13ra1   | 0.429752 | 0.005816 | 0.031945 |
| D11Wsu47  | 0.986033 | 0.005845 | 0.032067 |
| Rab20     | 1.582698 | 0.005872 | 0.032204 |
| Ttc38     | 0.968871 | 0.005901 | 0.032329 |
| Engase    | 1.052617 | 0.005915 | 0.032382 |
| Dclre1b   | 0.896908 | 0.005962 | 0.032578 |
| Ak2       | 0.393909 | 0.005976 | 0.032642 |
| Glrx2     | 0.304278 | 0.005984 | 0.032672 |
| Adam10    | 0.182115 | 0.005986 | 0.032672 |

|           |          |          |          |
|-----------|----------|----------|----------|
| Gm16845   | 1.68909  | 0.006049 | 0.032954 |
| Nxt1      | 0.408131 | 0.006034 | 0.032892 |
| Tmed2     | 0.208181 | 0.006028 | 0.03288  |
| Gm7072    | 0.570287 | 0.006065 | 0.033031 |
| Arl8a     | 0.336394 | 0.006086 | 0.033124 |
| Sdc3      | 0.198098 | 0.006103 | 0.033192 |
| Plekhg2   | 0.361225 | 0.006118 | 0.033262 |
| Dnajb11   | 0.286815 | 0.006143 | 0.033382 |
| Susd2     | 1.129218 | 0.006169 | 0.033498 |
| Snhg6     | 0.451377 | 0.006177 | 0.033534 |
| Tpd52l2   | 0.293484 | 0.006231 | 0.033778 |
| Slc50a1   | 0.20719  | 0.006229 | 0.033778 |
| Itgb1bp1  | 0.423488 | 0.006256 | 0.033897 |
| Acbd6     | 0.304863 | 0.00633  | 0.034275 |
| Plpbp     | 0.389155 | 0.00637  | 0.034468 |
| Tepp      | 1.536149 | 0.006392 | 0.034567 |
| Pld1      | 0.550256 | 0.006396 | 0.034572 |
| Ubr7      | 0.396653 | 0.006393 | 0.034567 |
| Pdcd5     | 0.223457 | 0.006409 | 0.034626 |
| Mef2d     | 0.251541 | 0.006422 | 0.034688 |
| Acbd4     | 0.520508 | 0.006474 | 0.034917 |
| Gnl1      | 0.387715 | 0.006471 | 0.034913 |
| Snx4      | 0.35729  | 0.0065   | 0.035033 |
| Snhg1     | 0.331946 | 0.00651  | 0.035075 |
| Nipa2     | 0.375654 | 0.006553 | 0.035258 |
| 1110059E  | 0.393333 | 0.00656  | 0.035264 |
| Hk1       | 0.251949 | 0.006548 | 0.035251 |
| Tut7      | 0.200417 | 0.00657  | 0.035308 |
| B9d2      | 0.555308 | 0.00661  | 0.035477 |
| Cdc42se2  | 0.300574 | 0.006611 | 0.035477 |
| Sdf2l1    | 0.77435  | 0.00663  | 0.035568 |
| Rps15a-ps | 0.901612 | 0.006728 | 0.036026 |
| Tram2     | 0.518953 | 0.006781 | 0.03625  |
| Mzt2      | 0.528145 | 0.006873 | 0.036648 |
| Pigk      | 0.353756 | 0.006935 | 0.036951 |
| Gm22146   | 2.016483 | 0.006994 | 0.037237 |
| Llph      | 0.282    | 0.007006 | 0.037275 |
| Cnbp      | 0.138358 | 0.007014 | 0.037304 |
| Fibp      | 0.283531 | 0.007096 | 0.037699 |
| Ednrb     | 0.778188 | 0.007123 | 0.037749 |
| Ptprj     | 0.399322 | 0.007112 | 0.037749 |
| Abhd11    | 0.612633 | 0.007122 | 0.037749 |
| Micos10   | 0.173486 | 0.007141 | 0.037805 |
| Ccnd3     | 0.244741 | 0.007257 | 0.038378 |
| Tram1     | 0.249901 | 0.007279 | 0.038455 |
| Abcc4     | 0.216244 | 0.007328 | 0.038699 |
| Tspan31   | 0.331222 | 0.007348 | 0.03879  |

|          |          |          |          |
|----------|----------|----------|----------|
| Ncf4     | 4.315393 | 0.007391 | 0.038965 |
| Nlgn2    | 0.622008 | 0.007375 | 0.038891 |
| Arpp19   | 0.181859 | 0.00737  | 0.03888  |
| Fgfr1    | 0.422535 | 0.007411 | 0.039046 |
| Borcs6   | 0.371539 | 0.007414 | 0.039046 |
| Mettl27  | 1.056468 | 0.007491 | 0.039421 |
| Slc35d1  | 0.580882 | 0.007536 | 0.039576 |
| Snai1    | 1.083458 | 0.00757  | 0.039742 |
| Dda1     | 0.372045 | 0.007602 | 0.039861 |
| E230001N | 1.049864 | 0.007614 | 0.039902 |
| Zbp1     | 0.895783 | 0.007654 | 0.040066 |
| Kazn     | 0.646346 | 0.007665 | 0.040111 |
| Gm5148   | 1.061058 | 0.007685 | 0.040161 |
| Zcchc24  | 0.350875 | 0.007672 | 0.040133 |
| Snap29   | 0.471612 | 0.007685 | 0.040161 |
| Ubr5     | 0.231198 | 0.007681 | 0.040161 |
| Hbb-bs   | 0.529548 | 0.007713 | 0.040265 |
| Znrf1    | 0.236965 | 0.007736 | 0.04037  |
| Kras     | 0.190865 | 0.007772 | 0.040491 |
| Serbp1   | 0.137659 | 0.007773 | 0.040491 |
| Tmbim4   | 0.235638 | 0.007832 | 0.040746 |
| Klhl5    | 0.216455 | 0.007868 | 0.040902 |
| Cdk2ap2  | 0.260274 | 0.007886 | 0.040969 |
| Cmb1     | 1.219011 | 0.007969 | 0.041305 |
| Nus1     | 0.306467 | 0.007964 | 0.041305 |
| Pigt     | 0.366055 | 0.007958 | 0.0413   |
| Wdr37    | 0.2841   | 0.007983 | 0.041345 |
| Atox1    | 0.135134 | 0.008081 | 0.041765 |
| Gm43508  | 0.800213 | 0.00814  | 0.04201  |
| Tep1     | 0.862899 | 0.008197 | 0.042233 |
| Glmp     | 0.282563 | 0.008223 | 0.042336 |
| Slc25a28 | 0.347418 | 0.008235 | 0.042385 |
| Nasp     | 0.360347 | 0.008293 | 0.042621 |
| Oplah    | 0.757177 | 0.008318 | 0.042723 |
| Ajuba    | 0.494341 | 0.008343 | 0.042831 |
| Tmem115  | 0.420002 | 0.008358 | 0.042885 |
| Cnpy4    | 0.547913 | 0.008467 | 0.043355 |
| Trim62   | 0.814505 | 0.008488 | 0.0434   |
| Cutal    | 0.82129  | 0.0085   | 0.043451 |
| Pxk      | 0.283075 | 0.008509 | 0.043467 |
| Pnrc2    | 0.269679 | 0.008528 | 0.043549 |
| Rhebl1   | 0.692542 | 0.008621 | 0.043946 |
| Itga5    | 0.381436 | 0.008655 | 0.044075 |
| Ppp2ca   | 0.187363 | 0.008683 | 0.044187 |
| H1f4     | 0.426329 | 0.008712 | 0.044291 |
| S1pr4    | 0.53431  | 0.008738 | 0.044371 |
| Eps8     | 0.399858 | 0.00874  | 0.044371 |

|           |          |          |          |
|-----------|----------|----------|----------|
| Sh3bgrl   | 0.170603 | 0.008744 | 0.044379 |
| Peli2     | 0.407177 | 0.008754 | 0.044398 |
| Gm38197   | 0.380878 | 0.008778 | 0.044506 |
| Eml2      | 0.386897 | 0.008805 | 0.044569 |
| Klhl3     | 0.491625 | 0.008795 | 0.044529 |
| Tmem11    | 0.377411 | 0.008812 | 0.044588 |
| Pms2      | 0.575225 | 0.008847 | 0.044701 |
| Tstd3     | 0.964604 | 0.008855 | 0.04473  |
| Cdh5      | 0.132465 | 0.008887 | 0.044873 |
| Etnppl    | 0.95137  | 0.00892  | 0.044987 |
| Sh3glb1   | 0.130578 | 0.008908 | 0.044966 |
| Ppp4c     | 0.299363 | 0.008968 | 0.045209 |
| Tlcd3a    | 0.553915 | 0.008988 | 0.045279 |
| Stox1     | 0.655007 | 0.008987 | 0.045279 |
| Manea     | 0.54223  | 0.009021 | 0.045423 |
| Dop1b     | 0.449651 | 0.009023 | 0.045423 |
| Itgb2     | 2.525137 | 0.009052 | 0.045523 |
| Erlec1    | 0.328298 | 0.009055 | 0.045523 |
| Mta1      | 0.312384 | 0.009117 | 0.045804 |
| Itgb3bp   | 0.552267 | 0.009187 | 0.046063 |
| Pianp     | 0.444193 | 0.00922  | 0.046197 |
| Ppm1m     | 0.495098 | 0.009262 | 0.046393 |
| Tuba4a    | 0.591123 | 0.009265 | 0.046393 |
| Hadhb     | 0.252678 | 0.009276 | 0.046432 |
| Prdx2     | 0.163758 | 0.009348 | 0.04676  |
| Sgce      | 0.459892 | 0.009408 | 0.047029 |
| Rps10-ps2 | 0.616201 | 0.009436 | 0.047141 |
| Wfdc1     | 0.178717 | 0.009491 | 0.047399 |
| Kctd11    | 0.710158 | 0.00959  | 0.047843 |
| Prxl2b    | 0.486033 | 0.00961  | 0.0479   |
| Lix1l     | 0.330071 | 0.009611 | 0.0479   |
| Hsd17b10  | 0.321092 | 0.009713 | 0.048395 |
| Epdr1     | 1.084467 | 0.009776 | 0.048677 |
| Psmf1     | 0.486699 | 0.009795 | 0.048731 |
| Hspa13    | 0.396147 | 0.009797 | 0.048731 |
| Mmgt2     | 0.508477 | 0.009881 | 0.049067 |
| Slc44a2   | 0.316625 | 0.010019 | 0.04967  |
| Nfkb2     | 0.591558 | 0.010109 | 0.050035 |
| Zap70     | 0.778322 | 0.010211 | 0.050406 |
| Degs1     | 0.32227  | 0.010252 | 0.050589 |
| Tlcd2     | 0.916538 | 0.0103   | 0.050781 |
| 6430573P  | 1.490264 | 0.010322 | 0.050854 |
| Xiap      | 0.169398 | 0.01031  | 0.050808 |
| Myo1c     | 0.25464  | 0.010333 | 0.05089  |
| Creb3     | 0.395763 | 0.01035  | 0.050957 |
| Al467606  | 0.374873 | 0.01038  | 0.051086 |
| Aars      | 0.455796 | 0.01041  | 0.051218 |

|          |          |          |          |
|----------|----------|----------|----------|
| Stat6    | 0.355645 | 0.010468 | 0.051421 |
| Nfkbib   | 0.490029 | 0.010487 | 0.051481 |
| Tmem165  | 0.260624 | 0.010484 | 0.051481 |
| Ppm1a    | 0.211337 | 0.010559 | 0.0518   |
| Dgcr6    | 0.292878 | 0.010598 | 0.051974 |
| Plbd2    | 0.386788 | 0.010629 | 0.052088 |
| Ubtd1    | 0.464088 | 0.010712 | 0.052421 |
| Rnf181   | 0.345164 | 0.010714 | 0.052421 |
| Zbtb8os  | 0.455035 | 0.010787 | 0.052727 |
| Vsig10   | 0.46493  | 0.010803 | 0.052788 |
| 2410022N | 0.576995 | 0.010832 | 0.052896 |
| Gm37760  | 0.754265 | 0.010963 | 0.053484 |
| Chmp3    | 0.180201 | 0.010986 | 0.053561 |
| Actr3    | 0.206118 | 0.010999 | 0.053606 |
| Numb     | 0.347084 | 0.01102  | 0.053632 |
| Pcnx4    | 0.551021 | 0.011085 | 0.05385  |
| St3gal6  | 0.193734 | 0.011118 | 0.053992 |
| Ptgis    | 0.692242 | 0.011205 | 0.054259 |
| Trappc4  | 0.216391 | 0.011199 | 0.054259 |
| Dipk2b   | 0.518655 | 0.011251 | 0.054444 |
| Morf4l2  | 0.235966 | 0.011276 | 0.054549 |
| Acap2    | 0.264362 | 0.011315 | 0.054617 |
| Tcf4     | 0.102378 | 0.011316 | 0.054617 |
| Serinc1  | 0.162605 | 0.011323 | 0.054633 |
| Rcn2     | 0.215351 | 0.011382 | 0.054883 |
| Atxn7l3  | 0.351507 | 0.011391 | 0.054889 |
| Adamts13 | 1.692348 | 0.011414 | 0.05495  |
| Etfdh    | 0.393934 | 0.011404 | 0.054917 |
| Sh3gl1   | 0.294511 | 0.011534 | 0.055451 |
| Ltbr     | 0.353132 | 0.011537 | 0.055451 |
| Hnrnpd   | 0.182911 | 0.011619 | 0.055791 |
| Vdac1    | 0.197294 | 0.011631 | 0.055834 |
| Rsl1     | 0.888035 | 0.011674 | 0.056003 |
| Abca3    | 0.308373 | 0.011757 | 0.056292 |
| G3bp2    | 0.177687 | 0.011748 | 0.056285 |
| Tpra1    | 0.379043 | 0.011818 | 0.056549 |
| Ptpmt1   | 0.315112 | 0.01189  | 0.056856 |
| Acad12   | 0.951957 | 0.012003 | 0.057304 |
| Pdpf     | 0.228373 | 0.012021 | 0.057357 |
| Rab6a    | 0.188006 | 0.012128 | 0.057757 |
| Aldh9a1  | 0.284077 | 0.012326 | 0.058568 |
| Gm10275  | 1.706385 | 0.012369 | 0.058715 |
| Cyhr1    | 0.229983 | 0.012338 | 0.058604 |
| Gm34455  | 0.795951 | 0.012361 | 0.058697 |
| S100a9   | 1.240574 | 0.012415 | 0.058876 |
| Capn1    | 0.551773 | 0.012404 | 0.058844 |
| Ing1     | 0.236685 | 0.012555 | 0.059447 |

|          |          |          |          |
|----------|----------|----------|----------|
| Anxa4    | 0.381375 | 0.012617 | 0.059723 |
| Abhd17c  | 0.535328 | 0.01263  | 0.059766 |
| Rnf121   | 0.496321 | 0.012718 | 0.060129 |
| Wdr26    | 0.21594  | 0.012755 | 0.06028  |
| Al661453 | 0.759825 | 0.012784 | 0.060378 |
| Adss     | 0.285352 | 0.012819 | 0.060505 |
| Pycr2    | 0.362481 | 0.012887 | 0.060727 |
| E130311K | 0.741965 | 0.012907 | 0.060757 |
| Tmem185  | 0.50845  | 0.012909 | 0.060757 |
| Cyth4    | 0.867216 | 0.01303  | 0.061213 |
| Selenoh  | 0.292865 | 0.013185 | 0.061786 |
| Tuba1c   | 0.690186 | 0.013247 | 0.061998 |
| Tsc22d2  | 0.248277 | 0.013241 | 0.061998 |
| Fzd8     | 0.621726 | 0.013259 | 0.062035 |
| Gm46404  | 1.207346 | 0.01336  | 0.06245  |
| Mnd1     | 0.582772 | 0.01337  | 0.062476 |
| Spint2   | 0.561485 | 0.013422 | 0.062699 |
| Acyp1    | 0.385815 | 0.013532 | 0.063156 |
| 1810013L | 0.327923 | 0.013555 | 0.063243 |
| Yars     | 0.527186 | 0.013684 | 0.063765 |
| Mir703   | 0.460725 | 0.013702 | 0.063827 |
| Gm44164  | 0.631803 | 0.013737 | 0.063939 |
| Erc1     | 0.296915 | 0.013843 | 0.064387 |
| Sypl     | 0.152048 | 0.013875 | 0.064455 |
| Ptpru    | 0.502095 | 0.013903 | 0.064563 |
| Spa17    | 0.791591 | 0.013941 | 0.064644 |
| Synm     | 0.166997 | 0.013942 | 0.064644 |
| Ankrd11  | 0.155823 | 0.013966 | 0.064738 |
| Tuft1    | 1.275052 | 0.014021 | 0.06495  |
| Ssh3     | 1.245238 | 0.014035 | 0.064991 |
| Nosip    | 0.303059 | 0.014043 | 0.064991 |
| Golm1    | 0.295572 | 0.014105 | 0.065238 |
| Gatad2a  | 0.23715  | 0.014124 | 0.065286 |
| Dcbld1   | 0.611206 | 0.014171 | 0.065444 |
| Rnf130   | 0.234114 | 0.014156 | 0.065394 |
| Steap4   | 0.646865 | 0.014255 | 0.065752 |
| Lcp2     | 1.255384 | 0.014274 | 0.065818 |
| Larp4b   | 0.210372 | 0.014304 | 0.065915 |
| Acsf2    | 0.588597 | 0.01433  | 0.066017 |
| Umps     | 0.818307 | 0.014413 | 0.066296 |
| Serf2    | 0.137621 | 0.014448 | 0.066436 |
| Zc3h12a  | 0.737813 | 0.014531 | 0.066797 |
| Nsd3     | 0.202483 | 0.014598 | 0.067086 |
| Bola2    | 0.246559 | 0.014762 | 0.067693 |
| Nucb2    | 0.373768 | 0.014769 | 0.067702 |
| Trpc4ap  | 0.273936 | 0.014792 | 0.067769 |
| Creg1    | 0.291955 | 0.014863 | 0.06805  |

|           |          |          |          |
|-----------|----------|----------|----------|
| Ctc1      | 0.496262 | 0.014926 | 0.068317 |
| Dusp18    | 1.084368 | 0.01497  | 0.068438 |
| Ptpre     | 0.560638 | 0.014965 | 0.068435 |
| Crtc3     | 0.240449 | 0.015044 | 0.068732 |
| Ticam1    | 0.864909 | 0.015097 | 0.068934 |
| Dnajc24   | 0.443558 | 0.015279 | 0.069551 |
| Psme4     | 0.319581 | 0.015261 | 0.069537 |
| Retreg1   | 0.575159 | 0.015278 | 0.069551 |
| Ccnyl1    | 0.405603 | 0.015275 | 0.069551 |
| Gmppa     | 0.62576  | 0.015304 | 0.069646 |
| 1110046JC | 0.932543 | 0.015315 | 0.069676 |
| Gm47817   | 0.759917 | 0.015399 | 0.070013 |
| Bri3      | 0.152868 | 0.01542  | 0.070086 |
| Gm32688   | 0.450555 | 0.015494 | 0.070339 |
| Qars      | 0.370406 | 0.015545 | 0.070486 |
| Ascc1     | 0.438297 | 0.015562 | 0.070518 |
| C1qtnf6   | 0.862172 | 0.015617 | 0.070687 |
| Lmbrd1    | 0.209637 | 0.015647 | 0.070797 |
| Rreb1     | 0.315447 | 0.015739 | 0.071111 |
| Cep57l1   | 0.58403  | 0.01574  | 0.071111 |
| Dbnidd2   | 0.539586 | 0.015782 | 0.071223 |
| Shpk      | 1.108165 | 0.0158   | 0.071272 |
| Gm44292   | 1.193847 | 0.015825 | 0.071321 |
| Pisd-ps1  | 1.421854 | 0.015859 | 0.071432 |
| Comt      | 0.274917 | 0.015873 | 0.071452 |
| Fam210b   | 0.365254 | 0.015867 | 0.071445 |
| Pla2g12a  | 0.356467 | 0.016006 | 0.071945 |
| Lpin1     | 0.364456 | 0.016011 | 0.071946 |
| Zfp605    | 0.817621 | 0.01605  | 0.072055 |
| Kdm1a     | 0.242665 | 0.016215 | 0.072656 |
| Nfyb      | 0.266462 | 0.016229 | 0.072661 |
| Gm37718   | 1.098906 | 0.016311 | 0.072919 |
| Acat2     | 0.547927 | 0.016319 | 0.072933 |
| Gtf2ird1  | 0.319375 | 0.016374 | 0.073137 |
| Ifngr2    | 0.422843 | 0.016478 | 0.073535 |
| Itpr3     | 0.288878 | 0.016502 | 0.073599 |
| Mrpl17    | 0.246277 | 0.01664  | 0.074127 |
| Acer3     | 0.598053 | 0.016797 | 0.074648 |
| Herpud1   | 0.219572 | 0.016787 | 0.074648 |
| Hint3     | 0.321118 | 0.016824 | 0.074724 |
| S100a8    | 1.478619 | 0.016895 | 0.074947 |
| Lrrc8d    | 0.460798 | 0.016855 | 0.074814 |
| Fastkd1   | 0.651584 | 0.016962 | 0.075128 |
| Fndc1     | 0.732237 | 0.016964 | 0.075128 |
| C230096K  | 0.377774 | 0.016966 | 0.075128 |
| Nkd2      | 0.657608 | 0.017012 | 0.075268 |
| Sox12     | 0.508925 | 0.01704  | 0.075345 |



|            |          |          |          |
|------------|----------|----------|----------|
| Mtpn       | 0.183895 | 0.01707  | 0.075436 |
| Mtdh       | 0.159287 | 0.017076 | 0.075437 |
| Aatk       | 0.814479 | 0.017182 | 0.075849 |
| Rab2b      | 0.390329 | 0.017203 | 0.075908 |
| Plppr2     | 0.964865 | 0.017352 | 0.076453 |
| Zfp820     | 0.554066 | 0.01735  | 0.076453 |
| Marchf7    | 0.196677 | 0.017369 | 0.076485 |
| Phlda1     | 0.473052 | 0.017502 | 0.076913 |
| Lrig3      | 0.745257 | 0.017531 | 0.076987 |
| Phc1       | 0.317852 | 0.017602 | 0.077193 |
| Tyrobp     | 1.344664 | 0.017632 | 0.077259 |
| Psmc8      | 0.19426  | 0.017631 | 0.077259 |
| Gm42572    | 0.652221 | 0.017659 | 0.077307 |
| Gm31166    | 1.134731 | 0.017748 | 0.077647 |
| Psmc6      | 0.193874 | 0.017752 | 0.077647 |
| Grk5       | 0.340423 | 0.017865 | 0.078097 |
| Asns       | 1.021888 | 0.017945 | 0.078351 |
| Gm48585    | 0.670512 | 0.018137 | 0.079098 |
| Fam234b    | 0.87725  | 0.018231 | 0.079439 |
| Irx5       | 0.312937 | 0.018303 | 0.079709 |
| Trim46     | 2.176817 | 0.018393 | 0.079981 |
| Tcf7l1     | 0.366665 | 0.018384 | 0.079981 |
| Slc16a9    | 0.248072 | 0.018378 | 0.079981 |
| Eif6       | 0.220597 | 0.018391 | 0.079981 |
| Npr2       | 0.56906  | 0.018534 | 0.080527 |
| Fermt3     | 1.382754 | 0.018617 | 0.080745 |
| Tusc2      | 0.377506 | 0.018618 | 0.080745 |
| Ostm1      | 0.497643 | 0.018638 | 0.080765 |
| Zfp560     | 0.339585 | 0.018628 | 0.080745 |
| Itga3      | 0.578429 | 0.01869  | 0.080923 |
| Lta4h      | 0.288321 | 0.018726 | 0.081031 |
| Lama4      | 0.219501 | 0.018749 | 0.081107 |
| Wipi2      | 0.308666 | 0.018812 | 0.081334 |
| Mrm1       | 1.104096 | 0.018925 | 0.081654 |
| Tead3      | 0.904419 | 0.018932 | 0.08166  |
| Rin1       | 0.909356 | 0.018959 | 0.081754 |
| H2ac24     | 0.973049 | 0.019044 | 0.082021 |
| 3110040N   | 0.644844 | 0.019058 | 0.082042 |
| 5430416N   | 0.699468 | 0.019089 | 0.082126 |
| Pcdhb7     | 1.156251 | 0.019124 | 0.082229 |
| Mical1     | 0.384577 | 0.019134 | 0.082248 |
| Tmem140    | 0.265308 | 0.019173 | 0.082394 |
| Pigl       | 1.00194  | 0.019257 | 0.082673 |
| Rpl10a-ps1 | 0.471224 | 0.01926  | 0.082673 |
| Ssh1       | 0.276308 | 0.019286 | 0.082737 |
| Wnk1       | 0.138312 | 0.019448 | 0.083337 |
| Chst12     | 0.706353 | 0.019484 | 0.083467 |

|          |          |          |          |
|----------|----------|----------|----------|
| Rasgef1a | 0.587404 | 0.019503 | 0.083475 |
| Mideas   | 0.378084 | 0.019533 | 0.083558 |
| Rab18    | 0.166614 | 0.019625 | 0.083868 |
| Nav1     | 0.172579 | 0.019628 | 0.083868 |
| Syn3     | 0.484098 | 0.019747 | 0.084302 |
| Cpped1   | 0.49068  | 0.019763 | 0.084347 |
| Gorasp2  | 0.25867  | 0.019784 | 0.084412 |
| Tceal8   | 0.28255  | 0.019799 | 0.084438 |
| Tax1bp3  | 0.277284 | 0.019801 | 0.084438 |
| Gm9800   | 0.630098 | 0.019896 | 0.084745 |
| Dpp3     | 0.457797 | 0.019955 | 0.084875 |
| Sdc4     | 0.416872 | 0.020044 | 0.085181 |
| Ino80b   | 0.365326 | 0.020065 | 0.085247 |
| Tm6sf2   | 1.07757  | 0.02015  | 0.085512 |
| Gm45266  | 1.089467 | 0.020158 | 0.085522 |
| Gm37080  | 0.948794 | 0.020175 | 0.085571 |
| A030001D | 0.470354 | 0.020212 | 0.085682 |
| Cyp2j6   | 0.671931 | 0.020219 | 0.085682 |
| Rbfa     | 0.382007 | 0.020249 | 0.085786 |
| Eln      | 0.32463  | 0.020271 | 0.085853 |
| Tbc1d10a | 0.40746  | 0.020332 | 0.086016 |
| Zfp869   | 0.319831 | 0.020395 | 0.08621  |
| Pfdn1    | 0.191798 | 0.02047  | 0.086503 |
| Mxra7    | 0.184938 | 0.020491 | 0.086567 |
| Gal3st3  | 1.697326 | 0.020671 | 0.087181 |
| Ppp1r11  | 0.203752 | 0.020641 | 0.087079 |
| Pigx     | 0.370692 | 0.020695 | 0.08723  |
| Pgs1     | 0.436681 | 0.020945 | 0.088137 |
| Ddt      | 0.238978 | 0.021011 | 0.088387 |
| Adat2    | 0.898787 | 0.02105  | 0.088491 |
| Sumo1    | 0.178735 | 0.021017 | 0.088391 |
| Edem1    | 0.399585 | 0.021105 | 0.088662 |
| Ift43    | 0.307063 | 0.021155 | 0.088819 |
| Mboat7   | 0.447307 | 0.021347 | 0.089527 |
| Ormdl3   | 0.263316 | 0.021718 | 0.090771 |
| Zhx3     | 0.263022 | 0.021723 | 0.090771 |
| Coro1a   | 2.314306 | 0.021814 | 0.091102 |
| Pbxip1   | 0.256387 | 0.021793 | 0.091039 |
| Stard5   | 0.535992 | 0.021855 | 0.09117  |
| Dock1    | 0.218499 | 0.021846 | 0.09117  |
| Tgfbr3   | 0.250223 | 0.021851 | 0.09117  |
| Hdac3    | 0.384822 | 0.021913 | 0.091363 |
| Vps39    | 0.498146 | 0.02202  | 0.091694 |
| Slc35a2  | 0.438619 | 0.022067 | 0.091779 |
| Rab10    | 0.17303  | 0.022067 | 0.091779 |
| Ythdf2   | 0.272534 | 0.022153 | 0.092055 |
| Spata6   | 0.28424  | 0.022175 | 0.092119 |

|          |          |          |          |
|----------|----------|----------|----------|
| Tcea2    | 0.974903 | 0.022407 | 0.092938 |
| Znrf2    | 0.319395 | 0.022412 | 0.092938 |
| Tmem250  | 0.365118 | 0.022415 | 0.092938 |
| Irf1     | 0.269179 | 0.022458 | 0.093091 |
| Ntpcr    | 0.55066  | 0.022478 | 0.093101 |
| P3h4     | 0.43532  | 0.022479 | 0.093101 |
| Osbpl10  | 0.854782 | 0.022624 | 0.093495 |
| Nav2     | 0.365969 | 0.022619 | 0.093495 |
| Ago2     | 0.235459 | 0.022623 | 0.093495 |
| Spindoc  | 0.521344 | 0.022818 | 0.094112 |
| Ppm1j    | 0.900512 | 0.022839 | 0.094147 |
| Mrpl2    | 0.326059 | 0.022896 | 0.094356 |
| Stk3     | 0.294533 | 0.02296  | 0.09457  |
| Oser1    | 0.332467 | 0.02302  | 0.094737 |
| Gm48682  | 1.635045 | 0.023073 | 0.094877 |
| Gm10687  | 0.696784 | 0.023152 | 0.09507  |
| Mrpl33   | 0.191101 | 0.023159 | 0.095076 |
| Ppp1r13b | 0.201435 | 0.023189 | 0.095166 |
| Lman2    | 0.218177 | 0.023288 | 0.095445 |
| Creb3l2  | 0.250303 | 0.023322 | 0.095507 |
| Cmtm3    | 0.612842 | 0.023434 | 0.095811 |
| Adam15   | 0.162801 | 0.023471 | 0.095936 |
| Tanc1    | 0.186346 | 0.023555 | 0.096172 |
| Gm45716  | 0.447816 | 0.023669 | 0.096534 |
| Immp2l   | 0.528145 | 0.023762 | 0.096835 |
| Rhog     | 0.32327  | 0.023809 | 0.096973 |
| Pcdhb17  | 0.673892 | 0.02419  | 0.098236 |
| Decr1    | 0.334577 | 0.024173 | 0.098213 |
| Impdh2   | 0.330671 | 0.024212 | 0.09824  |
| Psmb2    | 0.169755 | 0.024196 | 0.098236 |
| Cenpt    | 0.622377 | 0.024303 | 0.098529 |
| Zbtb25   | 0.700692 | 0.024401 | 0.098844 |
| Gm43820  | 0.735636 | 0.024477 | 0.099018 |
| Bin3     | 0.438723 | 0.02446  | 0.098979 |
| Rnf114   | 0.295642 | 0.024497 | 0.099074 |
| Tmc4     | 1.073698 | 0.024549 | 0.099255 |
| Rftn1    | 0.455694 | 0.024624 | 0.099533 |
| Retsat   | 0.543961 | 0.024746 | 0.099946 |
| Gyg      | 0.306128 | 0.024758 | 0.099967 |
| Emd      | 0.255879 | 0.024784 | 0.100016 |
| Bag3     | 0.29361  | 0.024864 | 0.100232 |
| Gm49864  | 1.729954 | 0.024942 | 0.100494 |
| Trnau1ap | 0.237531 | 0.024988 | 0.10059  |
| Bach2    | 0.557771 | 0.025022 | 0.100681 |
| Cnn3     | 0.169011 | 0.025051 | 0.100769 |
| Nudt22   | 0.473429 | 0.025301 | 0.101528 |
| Selenon  | 0.361077 | 0.025418 | 0.101946 |

|          |          |          |          |
|----------|----------|----------|----------|
| Lysmd3   | 0.304468 | 0.025522 | 0.102334 |
| Agl      | 0.339008 | 0.025611 | 0.102664 |
| Slc12a4  | 0.362682 | 0.025622 | 0.102679 |
| Gm37352  | 0.894451 | 0.02567  | 0.10279  |
| Srxn1    | 0.588901 | 0.025668 | 0.10279  |
| Gprc5b   | 0.565437 | 0.025763 | 0.103005 |
| Dnajc10  | 0.206038 | 0.025852 | 0.103299 |
| Gm20008  | 0.968363 | 0.02595  | 0.103604 |
| Stk19    | 0.349335 | 0.025931 | 0.103559 |
| Ppil2    | 0.30322  | 0.025995 | 0.103729 |
| Erich1   | 0.358796 | 0.026002 | 0.10373  |
| Hook2    | 0.731982 | 0.02605  | 0.103782 |
| Mrps7    | 0.266445 | 0.02603  | 0.10377  |
| Rbpms    | 0.14087  | 0.026033 | 0.10377  |
| Kank2    | 0.242845 | 0.026085 | 0.103895 |
| Mprp     | 0.123613 | 0.026259 | 0.104393 |
| Gmds     | 0.331649 | 0.026425 | 0.104915 |
| Zfp687   | 0.508285 | 0.0267   | 0.105951 |
| Gipc1    | 0.325333 | 0.026781 | 0.106214 |
| Gm45223  | 0.299753 | 0.026908 | 0.106523 |
| Gchfr    | 0.961743 | 0.026998 | 0.106761 |
| Vsig2    | 0.464786 | 0.027001 | 0.106761 |
| Med26    | 0.61768  | 0.027057 | 0.106884 |
| Gstt1    | 0.396693 | 0.027107 | 0.107028 |
| Sri      | 0.14979  | 0.027123 | 0.107057 |
| Akna     | 0.538168 | 0.027343 | 0.107674 |
| Pecr     | 0.932112 | 0.027377 | 0.107753 |
| Slc25a5  | 0.145354 | 0.027368 | 0.107745 |
| Ttc39b   | 0.347617 | 0.027419 | 0.10789  |
| B3galt4  | 0.826143 | 0.027452 | 0.107992 |
| Dnaja2   | 0.183873 | 0.027542 | 0.108286 |
| Copz2    | 0.244539 | 0.027577 | 0.108356 |
| Zfp688   | 0.566896 | 0.027614 | 0.108458 |
| 1700003F | 1.452982 | 0.027678 | 0.108651 |
| Coa7     | 0.385868 | 0.027779 | 0.108932 |
| Snap23   | 0.269674 | 0.027763 | 0.108897 |
| Gm4017   | 1.020968 | 0.027804 | 0.108976 |
| Galt     | 0.43599  | 0.028077 | 0.109813 |
| Tm9sf2   | 0.1646   | 0.028073 | 0.109813 |
| Praf2    | 0.391075 | 0.028119 | 0.109904 |
| Impdh1   | 0.169356 | 0.028148 | 0.109947 |
| Cct2     | 0.189277 | 0.028189 | 0.110054 |
| Sord     | 0.699191 | 0.028226 | 0.110111 |
| Xpnpep1  | 0.322292 | 0.02822  | 0.110111 |
| Heph     | 0.835428 | 0.028255 | 0.110193 |
| Mcrip1   | 0.210644 | 0.028295 | 0.110218 |
| Nrbp2    | 0.592024 | 0.028326 | 0.110268 |

|          |          |          |          |
|----------|----------|----------|----------|
| Dennd1b  | 0.313885 | 0.028315 | 0.110254 |
| Galns    | 1.290303 | 0.028407 | 0.110497 |
| Alad     | 0.302142 | 0.028363 | 0.110387 |
| Slc35b1  | 0.242072 | 0.028372 | 0.11039  |
| Isg20    | 0.522654 | 0.028454 | 0.110653 |
| Idua     | 0.886932 | 0.028496 | 0.110759 |
| Gfus     | 0.381712 | 0.028538 | 0.110894 |
| Kifc3    | 0.250748 | 0.028677 | 0.111316 |
| Rcbtb1   | 0.272781 | 0.02875  | 0.111542 |
| Pole2    | 1.039844 | 0.028841 | 0.111835 |
| Ddx3y    | 0.185924 | 0.028799 | 0.111703 |
| Asnsd1   | 0.420153 | 0.028901 | 0.111982 |
| Atp9a    | 0.452975 | 0.028913 | 0.112    |
| Klhl6    | 0.325735 | 0.028979 | 0.112201 |
| Apobec3  | 0.420751 | 0.029005 | 0.11226  |
| Pals1    | 0.267152 | 0.029012 | 0.11226  |
| Jdp2     | 0.481126 | 0.029087 | 0.112412 |
| Heca     | 0.255475 | 0.029126 | 0.112507 |
| Ccdc149  | 0.834125 | 0.029217 | 0.112742 |
| Psma5    | 0.206873 | 0.029185 | 0.112676 |
| Arhgef28 | 0.328144 | 0.029353 | 0.113133 |
| 1110065P | 0.309224 | 0.029562 | 0.113778 |
| 2810403D | 0.640506 | 0.029573 | 0.113785 |
| Fkbp15   | 0.309547 | 0.02959  | 0.113798 |
| Plcd1    | 0.67058  | 0.029663 | 0.114051 |
| Narf     | 0.339378 | 0.029692 | 0.114134 |
| Paip2    | 0.147032 | 0.0297   | 0.114134 |
| Aplp1    | 0.45651  | 0.029986 | 0.115146 |
| Blvra    | 0.340402 | 0.030048 | 0.115268 |
| Capn5    | 1.02192  | 0.030246 | 0.115641 |
| Stim2    | 0.233222 | 0.030313 | 0.115837 |
| Tmem120  | 0.564767 | 0.030362 | 0.115963 |
| Stn1     | 0.602421 | 0.030564 | 0.116558 |
| Hspa1b   | 0.223716 | 0.030585 | 0.116609 |
| Rnaseh2b | 0.598202 | 0.030634 | 0.116739 |
| Slc41a3  | 0.786917 | 0.030652 | 0.116775 |
| Hexb     | 0.31989  | 0.030829 | 0.117419 |
| Bcorl1   | 0.413968 | 0.031162 | 0.118446 |
| Ttc12    | 0.686711 | 0.031506 | 0.119419 |
| Bambi    | 0.321523 | 0.031516 | 0.119428 |
| Nrgn     | 0.418697 | 0.031598 | 0.119706 |
| Gm49405  | 1.310477 | 0.031702 | 0.120071 |
| Dbn1     | 0.664808 | 0.031899 | 0.120604 |
| Shank3   | 0.348928 | 0.031885 | 0.12058  |
| Cox5b    | 0.13148  | 0.031882 | 0.12058  |
| Hbp1     | 0.224553 | 0.032053 | 0.121002 |
| Arpc1a   | 0.181801 | 0.032051 | 0.121002 |

|          |          |          |          |
|----------|----------|----------|----------|
| Fam149a  | 0.507292 | 0.032077 | 0.121061 |
| Kdm6a    | 0.249257 | 0.032109 | 0.121154 |
| Gm17823  | 0.986849 | 0.032219 | 0.121355 |
| Lrrc58   | 0.148357 | 0.032175 | 0.121266 |
| Amer1    | 0.453517 | 0.032301 | 0.121541 |
| Slc25a24 | 0.312729 | 0.032425 | 0.121914 |
| Ptger1   | 1.051779 | 0.03249  | 0.122128 |
| Atp5c1   | 0.129391 | 0.032584 | 0.122407 |
| Msh5     | 1.613284 | 0.032744 | 0.122762 |
| Mcub     | 0.372965 | 0.032708 | 0.122672 |
| Gem      | 0.90739  | 0.033011 | 0.123529 |
| Parn     | 0.387712 | 0.033117 | 0.123849 |
| Brd4     | 0.169398 | 0.033121 | 0.123849 |
| Pdia5    | 0.413944 | 0.033303 | 0.124435 |
| Luzp1    | 0.115347 | 0.033293 | 0.12443  |
| Cd99l2   | 0.306581 | 0.033465 | 0.124948 |
| Nr2f2    | 0.210253 | 0.033514 | 0.1251   |
| Gm45069  | 3.823506 | 0.033643 | 0.125488 |
| Hus1     | 0.421743 | 0.033804 | 0.125961 |
| Ndufaf7  | 0.291477 | 0.033783 | 0.125916 |
| Cyp1b1   | 1.47565  | 0.033951 | 0.12632  |
| Spidr    | 0.428376 | 0.03398  | 0.126398 |
| Aimp1    | 0.192451 | 0.034085 | 0.126664 |
| Dctn3    | 0.177601 | 0.034266 | 0.127176 |
| Ccdc12   | 0.169371 | 0.034308 | 0.127299 |
| Paqr8    | 0.553656 | 0.034386 | 0.127497 |
| Slc35f1  | 2.412843 | 0.034452 | 0.127644 |
| Washc3   | 0.316072 | 0.034542 | 0.127822 |
| Gm48627  | 2.160333 | 0.034672 | 0.127986 |
| Nfib     | 0.110807 | 0.034585 | 0.127842 |
| B4galt1  | 0.282333 | 0.034699 | 0.128055 |
| Inf2     | 0.21644  | 0.034771 | 0.128194 |
| Elk4     | 0.200579 | 0.034855 | 0.128406 |
| Gm15420  | 2.34205  | 0.034931 | 0.128593 |
| Ltbp3    | 0.496066 | 0.035049 | 0.128933 |
| Tmem170  | 0.543322 | 0.035232 | 0.129509 |
| Pomp     | 0.111686 | 0.035212 | 0.129467 |
| 6030400A | 1.054383 | 0.035303 | 0.129675 |
| Ahdc1    | 0.331546 | 0.035262 | 0.129589 |
| Dcp2     | 0.349425 | 0.035354 | 0.12983  |
| Fbxl21   | 1.726803 | 0.035441 | 0.130054 |
| Ppp1r12c | 0.19887  | 0.035419 | 0.130004 |
| Rp2      | 0.518746 | 0.035508 | 0.130238 |
| Slc39a7  | 1.289468 | 0.035645 | 0.130675 |
| Iah1     | 0.36329  | 0.035717 | 0.130907 |
| Gm47643  | 2.32166  | 0.035813 | 0.131162 |
| Fah      | 0.751635 | 0.03596  | 0.131453 |

|          |          |          |          |
|----------|----------|----------|----------|
| Tusc1    | 0.652116 | 0.035963 | 0.131453 |
| Plcd3    | 0.487435 | 0.036124 | 0.131913 |
| Acsl4    | 0.365925 | 0.036155 | 0.131962 |
| Mvp      | 0.296759 | 0.036194 | 0.13201  |
| Morrbid  | 0.388475 | 0.036347 | 0.132471 |
| Esrra    | 0.452439 | 0.036375 | 0.132539 |
| Dusp28   | 0.518995 | 0.036509 | 0.132867 |
| Bloc1s2  | 0.355187 | 0.036653 | 0.133293 |
| Pde12    | 0.422161 | 0.036792 | 0.133734 |
| Vkorc1   | 0.278453 | 0.036836 | 0.133862 |
| Wdr83os  | 0.2145   | 0.036942 | 0.134151 |
| Npepps   | 0.231203 | 0.036942 | 0.134151 |
| Tha1     | 1.238283 | 0.037047 | 0.134464 |
| Dnpep    | 0.226675 | 0.037151 | 0.13481  |
| Tubg1    | 0.458927 | 0.037379 | 0.135538 |
| Abcd1    | 0.409587 | 0.03741  | 0.135618 |
| Syndig1l | 2.97359  | 0.037534 | 0.135953 |
| Eif4e3   | 0.320236 | 0.037473 | 0.135813 |
| Gpsm3    | 0.327095 | 0.037539 | 0.135953 |
| Lamb2    | 0.143884 | 0.037591 | 0.136043 |
| Bmf      | 0.555863 | 0.037629 | 0.136148 |
| Nckipsd  | 0.589457 | 0.037801 | 0.136638 |
| Nedd9    | 0.21317  | 0.037995 | 0.137128 |
| Ikbkg    | 0.463786 | 0.038166 | 0.137623 |
| Bckdk    | 0.316791 | 0.038209 | 0.13768  |
| Tmem134  | 0.195574 | 0.038362 | 0.138034 |
| Cars     | 0.434212 | 0.038385 | 0.138049 |
| Shc1     | 0.306427 | 0.038433 | 0.138134 |
| Gramd4   | 0.509741 | 0.038436 | 0.138134 |
| Bag2     | 0.52613  | 0.038598 | 0.138581 |
| Psmd12   | 0.192916 | 0.038704 | 0.138928 |
| Pctp     | 0.828502 | 0.038771 | 0.139105 |
| Gm26935  | 1.440329 | 0.038904 | 0.139482 |
| Mthfr    | 0.464956 | 0.038855 | 0.139372 |
| Thrsp    | 0.41074  | 0.0389   | 0.139482 |
| Zc3hav1l | 0.911928 | 0.039083 | 0.139987 |
| Ergic3   | 0.183866 | 0.039064 | 0.139955 |
| Plagl2   | 0.397261 | 0.039256 | 0.140506 |
| Myo18a   | 0.223381 | 0.039296 | 0.140616 |
| Saysd1   | 0.272769 | 0.039364 | 0.140693 |
| Ube2h    | 0.202917 | 0.039361 | 0.140693 |
| Noxo1    | 1.003621 | 0.039435 | 0.140878 |
| Phf5a    | 0.215101 | 0.039538 | 0.141179 |
| Ubap1    | 0.363979 | 0.039639 | 0.141473 |
| Nfu1     | 0.24971  | 0.039659 | 0.141509 |
| Asb6     | 0.533486 | 0.03973  | 0.141728 |
| Tmem218  | 0.367152 | 0.040244 | 0.143187 |

|           |          |          |          |
|-----------|----------|----------|----------|
| Bclaf1    | 0.140777 | 0.040305 | 0.143338 |
| Ppp2r2d   | 0.174401 | 0.040377 | 0.14349  |
| Gm47000   | 2.295427 | 0.040694 | 0.14448  |
| Col5a1    | 1.393684 | 0.040807 | 0.144779 |
| Csad      | 0.306928 | 0.040772 | 0.144688 |
| Slc25a17  | 0.320073 | 0.040825 | 0.144807 |
| Cd27      | 1.281835 | 0.040907 | 0.145031 |
| Pars2     | 0.869908 | 0.040924 | 0.145056 |
| Nfatc4    | 0.41383  | 0.040956 | 0.145133 |
| Ahr       | 0.527465 | 0.040978 | 0.145178 |
| Donson    | 0.582944 | 0.041163 | 0.145696 |
| Nqo1      | 0.806375 | 0.041309 | 0.146074 |
| Tmem150   | 0.578529 | 0.041389 | 0.146218 |
| Ehd3      | 0.285994 | 0.041386 | 0.146218 |
| Trmu      | 0.560152 | 0.041402 | 0.14623  |
| Pbx1      | 0.181334 | 0.04154  | 0.146647 |
| Rlim      | 0.241542 | 0.041933 | 0.147759 |
| Nxpe2     | 0.390968 | 0.042075 | 0.148119 |
| Cdc25b    | 0.632005 | 0.042343 | 0.148817 |
| Stamos    | 1.477874 | 0.042551 | 0.149301 |
| Ppp1r35   | 0.302611 | 0.042519 | 0.149227 |
| Hadh      | 0.198376 | 0.042519 | 0.149227 |
| Mylk      | 0.191504 | 0.042574 | 0.149347 |
| Soat1     | 0.44734  | 0.042839 | 0.14995  |
| Bcl2l13   | 0.381768 | 0.042846 | 0.14995  |
| Bbx       | 0.209371 | 0.042893 | 0.15008  |
| Camk2g    | 0.275605 | 0.042997 | 0.150375 |
| Klf15     | 0.721618 | 0.043022 | 0.150384 |
| 1700123O  | 0.290788 | 0.043071 | 0.150438 |
| Mknk1     | 0.52921  | 0.043142 | 0.150599 |
| Nxpe3     | 0.889635 | 0.043543 | 0.151715 |
| Tnip2     | 0.339806 | 0.043514 | 0.15171  |
| Tlr3      | 0.3572   | 0.043521 | 0.15171  |
| Pold1     | 0.492354 | 0.043566 | 0.151761 |
| Psma1     | 0.16846  | 0.043594 | 0.151824 |
| Hbb-bt    | 0.881164 | 0.043659 | 0.151944 |
| Rps16-ps2 | 0.831953 | 0.043636 | 0.151897 |
| Fam78a    | 1.438163 | 0.043685 | 0.151999 |
| Cdk5rap3  | 0.325306 | 0.043632 | 0.151897 |
| Dcxr      | 0.571734 | 0.043721 | 0.152053 |
| Agbl5     | 0.641619 | 0.04372  | 0.152053 |
| Marcks1   | 0.483315 | 0.043764 | 0.152169 |
| Slc9a1    | 0.407147 | 0.043863 | 0.152476 |
| Lncpint   | 0.344357 | 0.043984 | 0.152832 |
| Rab8b     | 0.288451 | 0.044097 | 0.153113 |
| Zbtb4     | 0.156798 | 0.044144 | 0.153179 |
| Rxylt1    | 0.24673  | 0.044441 | 0.153987 |



|           |          |          |          |
|-----------|----------|----------|----------|
| Bag4      | 0.360868 | 0.04464  | 0.15446  |
| Hic2      | 0.535904 | 0.04465  | 0.15446  |
| Tgfb2     | 0.175842 | 0.044645 | 0.15446  |
| Nrm       | 0.423207 | 0.044718 | 0.154648 |
| Rasd1     | 0.311326 | 0.044736 | 0.154648 |
| Bud13     | 0.531026 | 0.044807 | 0.154859 |
| Chkb      | 0.451562 | 0.044842 | 0.154945 |
| Gm47101   | 1.308787 | 0.044928 | 0.155207 |
| Tmem144   | 1.294517 | 0.045113 | 0.155592 |
| Mrps16    | 0.205108 | 0.045109 | 0.155592 |
| Arf6      | 0.195615 | 0.045188 | 0.155672 |
| Tead1     | 0.216401 | 0.045394 | 0.156346 |
| Usp22     | 0.257445 | 0.045407 | 0.156356 |
| Rnf113a1  | 0.663427 | 0.045487 | 0.156558 |
| Triap1    | 0.28982  | 0.045647 | 0.156893 |
| Macrocl1  | 0.747788 | 0.045755 | 0.157155 |
| Armc10    | 0.348776 | 0.045819 | 0.157268 |
| Bpnt2     | 0.226386 | 0.045816 | 0.157268 |
| Sgk3      | 0.322751 | 0.046096 | 0.157892 |
| Atp6ap2   | 0.209491 | 0.046135 | 0.15799  |
| Wdr45b    | 0.233046 | 0.046184 | 0.158087 |
| Stt3a     | 0.233003 | 0.0463   | 0.158339 |
| Ankzf1    | 0.4555   | 0.04652  | 0.158888 |
| Brd2      | 0.141816 | 0.046622 | 0.159186 |
| Trmt6     | 0.365067 | 0.04675  | 0.159514 |
| Ecpas     | 0.221823 | 0.04675  | 0.159514 |
| Cecr2     | 0.344016 | 0.046781 | 0.159583 |
| Eps15l1   | 0.298081 | 0.046856 | 0.159657 |
| Pcsk4     | 0.936087 | 0.046973 | 0.159975 |
| Vps36     | 0.164308 | 0.046992 | 0.159975 |
| Mfge8     | 0.14632  | 0.047285 | 0.16079  |
| Samsn1    | 0.723526 | 0.047398 | 0.161063 |
| Renbp     | 0.606365 | 0.047452 | 0.161211 |
| Sqstm1    | 0.168952 | 0.047517 | 0.16137  |
| Cdc42ep2  | 0.306623 | 0.047535 | 0.16137  |
| Cipc      | 0.278424 | 0.047632 | 0.161602 |
| Ube2f     | 0.327519 | 0.04769  | 0.161687 |
| Antkmt    | 0.698205 | 0.047979 | 0.162447 |
| Rps27rt   | 0.270238 | 0.048215 | 0.163136 |
| Cdyl2     | 0.566242 | 0.048278 | 0.163277 |
| Macroh2a1 | 0.743902 | 0.048332 | 0.163406 |
| Tor2a     | 0.322716 | 0.048339 | 0.163406 |
| Slc47a2   | 1.049901 | 0.048388 | 0.163488 |
| Mid1ip1   | 0.314123 | 0.048385 | 0.163488 |
| Spes2     | 0.1359   | 0.048416 | 0.16352  |
| Ttr       | 0.993707 | 0.048601 | 0.164071 |
| Gpx3      | 0.701515 | 0.048651 | 0.164175 |

|          |          |          |          |
|----------|----------|----------|----------|
| Ctnnbip1 | 0.151496 | 0.048654 | 0.164175 |
| Pcdhb9   | 1.611269 | 0.048794 | 0.164575 |
| Mmp17    | 1.386481 | 0.048967 | 0.16501  |
| Itfg1    | 0.247355 | 0.04899  | 0.165024 |
| Pals2    | 0.38231  | 0.048994 | 0.165024 |
| Ccl25    | 0.472564 | 0.049063 | 0.165221 |
| Pigyl    | 0.260451 | 0.049134 | 0.165336 |
| Mtmr10   | 0.310783 | 0.049192 | 0.165379 |
| Wdr76    | 0.490661 | 0.049208 | 0.165379 |
| Gm43313  | 0.696443 | 0.049478 | 0.166206 |
| C1galt1  | 0.281744 | 0.04953  | 0.166303 |
| Zfp358   | 0.293366 | 0.049638 | 0.166586 |
| Haus1    | 0.479635 | 0.049737 | 0.16674  |
| Nlr1     | 0.70888  | 0.049811 | 0.166866 |
| Cdr2l    | 0.410216 | 0.049807 | 0.166866 |
| Zbtb22   | 0.351123 | 0.049819 | 0.166866 |
| Cyb5r3   | 0.123647 | 0.049883 | 0.167041 |
| Plaa     | 0.283282 | 0.049924 | 0.167143 |
| Eif4a1   | 0.137738 | 0.049984 | 0.167305 |
| Sdf2     | 0.204247 | 0.05012  | 0.167589 |
| Bax      | 0.175297 | 0.050124 | 0.167589 |
| Zdhhc24  | 0.595135 | 0.050254 | 0.167948 |
| Tmem50b  | 0.284496 | 0.050273 | 0.167974 |
| Rbm43    | 0.597986 | 0.05039  | 0.168294 |
| Car5b    | 0.396442 | 0.050445 | 0.168397 |
| Slc46a3  | 0.284508 | 0.050627 | 0.168818 |
| Spag5    | 2.123882 | 0.051015 | 0.169921 |
| Adamtsl4 | 0.621097 | 0.051246 | 0.170501 |
| Wsb2     | 0.234265 | 0.051261 | 0.170514 |
| Cisd3    | 0.398681 | 0.051352 | 0.170729 |
| Ccl6     | 2.691034 | 0.051458 | 0.170939 |
| Scaf11   | 0.142016 | 0.051415 | 0.170839 |
| Spag9    | 0.117854 | 0.051571 | 0.171189 |
| Gm1976   | 1.252366 | 0.051743 | 0.171697 |
| Vps72    | 0.261097 | 0.051973 | 0.172346 |
| Cdyl     | 0.340323 | 0.051997 | 0.172388 |
| P2rx4    | 0.331628 | 0.052032 | 0.172453 |
| Ndufb4   | 0.207917 | 0.05204  | 0.172453 |
| Abcc5    | 0.295401 | 0.052076 | 0.172534 |
| Gtpbp2   | 0.237953 | 0.052114 | 0.172622 |
| Hnrnp1   | 0.150465 | 0.05222  | 0.172935 |
| Slc7a6   | 0.728164 | 0.05241  | 0.17341  |
| Traf3ip2 | 0.790076 | 0.0524   | 0.17341  |
| Mthfd1l  | 0.956681 | 0.052478 | 0.173484 |
| Maml1    | 0.331573 | 0.052457 | 0.17345  |
| Smyd2    | 0.413611 | 0.052498 | 0.17351  |
| Klf7     | 0.109274 | 0.052534 | 0.173591 |

|           |          |          |          |
|-----------|----------|----------|----------|
| 1700120C  | 0.889995 | 0.052807 | 0.174316 |
| Samd1     | 0.392914 | 0.052796 | 0.174316 |
| Abt1      | 0.322105 | 0.052806 | 0.174316 |
| C130089Kl | 0.522604 | 0.052812 | 0.174316 |
| Nelfcd    | 0.328681 | 0.052981 | 0.174722 |
| Gm44950   | 0.51939  | 0.053106 | 0.174979 |
| Rtkn      | 0.822995 | 0.053203 | 0.175222 |
| Atp13a3   | 0.21601  | 0.05335  | 0.175574 |
| Bcat2     | 0.451343 | 0.053372 | 0.175586 |
| Zmiz2     | 0.254203 | 0.053769 | 0.17638  |
| Gm43362   | 0.258679 | 0.053842 | 0.17644  |
| Asah2     | 0.404916 | 0.05388  | 0.176518 |
| Smco4     | 0.157721 | 0.054406 | 0.178007 |
| Dnajc1    | 0.178201 | 0.054594 | 0.178467 |
| Zdhhc8    | 0.2982   | 0.054877 | 0.179117 |
| Cic       | 0.217815 | 0.0549   | 0.179117 |
| Tmem38b   | 0.386467 | 0.055122 | 0.179803 |
| 6330403Ll | 0.718068 | 0.055279 | 0.180274 |
| Acss2     | 0.619013 | 0.055352 | 0.180473 |
| C4b       | 1.05124  | 0.055389 | 0.180515 |
| Snd1      | 0.349676 | 0.055437 | 0.18063  |
| Taf10     | 0.177137 | 0.055684 | 0.181238 |
| Fdx1      | 0.239101 | 0.055721 | 0.18132  |
| Fzd10os   | 1.864776 | 0.055781 | 0.181413 |
| Lin7a     | 0.488823 | 0.055789 | 0.181413 |
| Pcf11     | 0.191467 | 0.055834 | 0.181413 |
| Scamp3    | 0.253652 | 0.055843 | 0.181413 |
| Gemin7    | 0.183378 | 0.055838 | 0.181413 |
| Fance     | 0.312681 | 0.056033 | 0.181823 |
| Ebp       | 0.244688 | 0.056047 | 0.181828 |
| Zfp579    | 0.504729 | 0.056238 | 0.182288 |
| Tmem222   | 0.322478 | 0.056256 | 0.18231  |
| Erp44     | 0.231785 | 0.056477 | 0.182906 |
| 2310001H  | 0.408053 | 0.056756 | 0.18365  |
| Gtf2a2    | 0.171661 | 0.056774 | 0.183668 |
| Rab8a     | 0.233251 | 0.056898 | 0.183991 |
| Tgif1     | 0.463397 | 0.057146 | 0.184593 |
| Tbcd      | 0.454522 | 0.05719  | 0.184655 |
| Ankrd33b  | 0.238294 | 0.057641 | 0.185951 |
| Hexim1    | 0.235959 | 0.058049 | 0.186984 |
| Nr5a2     | 0.530848 | 0.058509 | 0.188305 |
| Hdac9     | 0.312236 | 0.058507 | 0.188305 |
| Gab2      | 0.317226 | 0.058722 | 0.188911 |
| Kif16b    | 0.431085 | 0.058907 | 0.189341 |
| Tmcc3     | 0.20978  | 0.059    | 0.1896   |
| Gm15500   | 0.364345 | 0.059082 | 0.189722 |
| CamI      | 0.228654 | 0.059075 | 0.189722 |

|          |          |          |          |
|----------|----------|----------|----------|
| Larp4    | 0.221917 | 0.059105 | 0.189733 |
| Txndc12  | 0.254673 | 0.059241 | 0.190088 |
| Zfp764   | 0.506027 | 0.059278 | 0.190123 |
| Cdt1     | 1.243941 | 0.059718 | 0.191225 |
| Gm43387  | 0.856133 | 0.059753 | 0.191282 |
| Hdac6    | 0.511921 | 0.059927 | 0.191633 |
| Tst      | 0.633658 | 0.059986 | 0.191699 |
| Thumpd2  | 0.605499 | 0.060057 | 0.191885 |
| Tmem43   | 0.323315 | 0.060089 | 0.191885 |
| Chrna1os | 1.348554 | 0.060173 | 0.191969 |
| Ddx42    | 0.177035 | 0.060384 | 0.192436 |
| Gm33370  | 1.044088 | 0.060464 | 0.192528 |
| Osbpl2   | 0.275127 | 0.060424 | 0.192487 |
| Sema3b   | 1.846342 | 0.060527 | 0.192572 |
| Lrrc20   | 0.471026 | 0.060504 | 0.192572 |
| Zbtb7b   | 0.482056 | 0.060551 | 0.192572 |
| Ywhaz    | 0.09806  | 0.060555 | 0.192572 |
| Rrp36    | 0.358722 | 0.060902 | 0.19351  |
| Arrdc1   | 0.326291 | 0.061029 | 0.193791 |
| Lamp1    | 0.109219 | 0.061027 | 0.193791 |
| Epha7    | 0.736751 | 0.061081 | 0.193833 |
| Glrx3    | 0.180056 | 0.061077 | 0.193833 |
| Alox5ap  | 1.110212 | 0.061442 | 0.19473  |
| Sgms1    | 0.089071 | 0.061426 | 0.19473  |
| Jmjd7    | 0.754527 | 0.061544 | 0.19488  |
| Gm15545  | 1.152077 | 0.061547 | 0.19488  |
| Clk1     | 0.128244 | 0.061866 | 0.195619 |
| Itprl2   | 0.185451 | 0.061891 | 0.195633 |
| Mgrn1    | 0.241098 | 0.061896 | 0.195633 |
| Ints13   | 0.269995 | 0.06218  | 0.196268 |
| Cemip2   | 0.264446 | 0.062387 | 0.196687 |
| Pip4p2   | 0.364025 | 0.06266  | 0.197461 |
| Metrl    | 0.760971 | 0.062765 | 0.197712 |
| Zfp52    | 0.474119 | 0.062852 | 0.197943 |
| Smim20   | 0.326303 | 0.062881 | 0.197993 |
| Nrtn     | 1.025956 | 0.063203 | 0.198799 |
| Lsp1     | 1.611082 | 0.063548 | 0.199525 |
| Acy3     | 0.49128  | 0.063554 | 0.199525 |
| Tmem220  | 0.706527 | 0.063687 | 0.199856 |
| Gpr108   | 0.278899 | 0.063799 | 0.200125 |
| H2-M3    | 0.270774 | 0.063882 | 0.200303 |
| Rgs3     | 0.166215 | 0.063968 | 0.200446 |
| Pradc1   | 0.304672 | 0.064208 | 0.20103  |
| Minpp1   | 0.360646 | 0.064264 | 0.201162 |
| 1700025G | 0.432475 | 0.064362 | 0.201301 |
| Uqcrb    | 0.090284 | 0.06434  | 0.201299 |
| Dok3     | 1.139612 | 0.06443  | 0.20143  |

|          |          |          |          |
|----------|----------|----------|----------|
| 9430034N | 0.634931 | 0.064716 | 0.202238 |
| Eid2     | 0.273969 | 0.064709 | 0.202238 |
| 4921515G | 1.099379 | 0.064787 | 0.202335 |
| Topors   | 0.214028 | 0.064736 | 0.202259 |
| Dll1     | 0.754328 | 0.06477  | 0.202323 |
| Slc25a25 | 0.299716 | 0.065007 | 0.202935 |
| Zswim8   | 0.224768 | 0.065096 | 0.203129 |
| Ocel1    | 0.203571 | 0.065465 | 0.204068 |
| Hmga1b   | 0.649906 | 0.065609 | 0.20424  |
| Siah2    | 0.397714 | 0.065615 | 0.20424  |
| Cdk2     | 0.398167 | 0.065801 | 0.204711 |
| Celf5    | 1.444713 | 0.065975 | 0.205062 |
| Gtf2f2   | 0.370822 | 0.065911 | 0.20499  |
| Adpgk    | 0.532725 | 0.065943 | 0.205032 |
| Gm47112  | 2.251291 | 0.066209 | 0.205577 |
| Gm26759  | 0.633706 | 0.06621  | 0.205577 |
| Retnlg   | 1.752197 | 0.066504 | 0.206276 |
| Pde7b    | 0.394178 | 0.066424 | 0.206072 |
| Rpl6l    | 0.947554 | 0.06684  | 0.207105 |
| Tbc1d8   | 0.335836 | 0.066778 | 0.207042 |
| Pafah2   | 0.787302 | 0.066833 | 0.207105 |
| Ddx21    | 0.221936 | 0.066827 | 0.207105 |
| Snx17    | 0.194389 | 0.066899 | 0.207245 |
| Sinhcaf  | 0.365927 | 0.067061 | 0.207618 |
| Klk8     | 0.568156 | 0.067524 | 0.208764 |
| Gdpd5    | 0.300946 | 0.067489 | 0.208764 |
| Cox14    | 0.150583 | 0.067529 | 0.208764 |
| Pip5k1c  | 0.202306 | 0.067604 | 0.208953 |
| Ap1g2    | 0.676634 | 0.067756 | 0.209294 |
| Tspan2   | 0.304447 | 0.067772 | 0.2093   |
| Casp6    | 0.260495 | 0.067797 | 0.209332 |
| Armt1    | 0.495939 | 0.067931 | 0.209585 |
| Zdhhc1   | 0.326402 | 0.067946 | 0.209585 |
| Tmem158  | 0.491958 | 0.067962 | 0.209585 |
| Tmem37   | 0.412503 | 0.067945 | 0.209585 |
| F2r      | 0.414533 | 0.067962 | 0.209585 |
| Gxylt1   | 0.256824 | 0.068033 | 0.209734 |
| Eef2kmt  | 0.294294 | 0.068106 | 0.209899 |
| Slc31a2  | 0.196659 | 0.068145 | 0.209974 |
| Dlst     | 0.242005 | 0.068224 | 0.210174 |
| Neu1     | 0.33495  | 0.0683   | 0.210324 |
| Creld1   | 0.320376 | 0.068336 | 0.21039  |
| Gm4468   | 0.734267 | 0.068475 | 0.210776 |
| Pdha1    | 0.203965 | 0.0685   | 0.210793 |
| Nmt1     | 0.177749 | 0.068542 | 0.210851 |
| Fcho1    | 1.807747 | 0.068631 | 0.210985 |
| Sdhaf4   | 0.219665 | 0.068678 | 0.211051 |

|          |          |          |          |
|----------|----------|----------|----------|
| Rbm18    | 0.242767 | 0.068819 | 0.211398 |
| Fam217b  | 0.391377 | 0.068869 | 0.211476 |
| Ern1     | 0.382058 | 0.068899 | 0.211476 |
| Rpl37rt  | 0.356344 | 0.06892  | 0.211476 |
| Atxn10   | 0.236689 | 0.068906 | 0.211476 |
| Ankrd28  | 0.254629 | 0.068929 | 0.211476 |
| Tex2     | 0.459631 | 0.06913  | 0.211949 |
| Cyp20a1  | 0.306634 | 0.069146 | 0.211949 |
| Ggh      | 0.229675 | 0.069154 | 0.211949 |
| Aff1     | 0.202139 | 0.069312 | 0.212304 |
| Glod4    | 0.233821 | 0.069631 | 0.213064 |
| Rps2-ps9 | 0.609153 | 0.069668 | 0.213133 |
| Gm49774  | 1.383347 | 0.069752 | 0.213216 |
| Fam89a   | 0.6738   | 0.069717 | 0.213196 |
| 3110009E | 0.669477 | 0.070001 | 0.213666 |
| Etfa     | 0.214533 | 0.070005 | 0.213666 |
| Dctn2    | 0.150229 | 0.070014 | 0.213666 |
| Prkacb   | 0.158436 | 0.070126 | 0.213877 |
| Mlec     | 0.271011 | 0.070404 | 0.214463 |
| Pih1d1   | 0.275726 | 0.070526 | 0.214747 |
| Eif3b    | 0.188385 | 0.070548 | 0.214771 |
| Ammecr1  | 0.319889 | 0.070588 | 0.214793 |
| Slc7a7   | 0.430223 | 0.07062  | 0.214816 |
| Mtmr7    | 0.6884   | 0.070744 | 0.215105 |
| Neurl1a  | 1.100822 | 0.070871 | 0.215317 |
| Gdpd3    | 0.871033 | 0.070953 | 0.215502 |
| Mertk    | 0.243815 | 0.070975 | 0.215502 |
| Omd      | 0.559562 | 0.071012 | 0.215571 |
| Gm10138  | 0.66231  | 0.071071 | 0.215663 |
| Ubash3b  | 1.069759 | 0.071094 | 0.215689 |
| Ndufb7   | 0.10567  | 0.071198 | 0.215915 |
| Mmp14    | 0.444299 | 0.071245 | 0.215969 |
| Tra2b    | 0.127634 | 0.071228 | 0.215964 |
| H3c6     | 0.908941 | 0.071391 | 0.216316 |
| Nek3     | 0.691847 | 0.071402 | 0.216316 |
| Casp9    | 0.452711 | 0.071829 | 0.217434 |
| Dmac2l   | 0.51984  | 0.072495 | 0.219139 |
| Tmem30a  | 0.114225 | 0.072518 | 0.219163 |
| Ube2b    | 0.12337  | 0.072551 | 0.219176 |
| Zscan2   | 0.627464 | 0.072702 | 0.219454 |
| Ggta1    | 0.243578 | 0.072685 | 0.219447 |
| Jade2    | 0.26119  | 0.072738 | 0.219475 |
| Aga      | 0.436171 | 0.07281  | 0.219649 |
| Uhrf2    | 0.183775 | 0.072925 | 0.219847 |
| Myadm    | 0.220855 | 0.072935 | 0.219847 |
| Atp10a   | 0.136309 | 0.07302  | 0.220046 |
| Uvssa    | 0.225883 | 0.073136 | 0.220319 |

|          |          |          |          |
|----------|----------|----------|----------|
| Lyrm9    | 0.41133  | 0.073218 | 0.220488 |
| Slc29a3  | 0.507294 | 0.07324  | 0.220488 |
| Pcdhb21  | 0.920289 | 0.07323  | 0.220488 |
| Hps1     | 0.742556 | 0.073251 | 0.220488 |
| C230053D | 0.645856 | 0.073278 | 0.220526 |
| Adam11   | 0.815618 | 0.073321 | 0.220566 |
| Csnk1d   | 0.204645 | 0.07375  | 0.221456 |
| Zfp526   | 1.031697 | 0.074053 | 0.222278 |
| Pxmp4    | 0.302172 | 0.074041 | 0.222278 |
| Gm20655  | 0.52747  | 0.074128 | 0.22246  |
| Gale     | 0.932779 | 0.074274 | 0.222851 |
| Gm43336  | 0.431054 | 0.074347 | 0.222983 |
| Alg5     | 0.264321 | 0.074402 | 0.223057 |
| Tmem38a  | 0.61193  | 0.074582 | 0.223418 |
| Wsb1     | 0.211166 | 0.074702 | 0.223733 |
| Gm42671  | 1.384475 | 0.074919 | 0.224177 |
| Plekha2  | 0.249764 | 0.074873 | 0.22411  |
| Chpf2    | 0.360142 | 0.074964 | 0.224204 |
| Eif2ak4  | 0.372299 | 0.074979 | 0.224204 |
| Shoc2    | 0.176056 | 0.075008 | 0.224246 |
| Inpp5k   | 0.230462 | 0.075124 | 0.224547 |
| Ncf1     | 2.355632 | 0.075605 | 0.225671 |
| Prelid2  | 0.424829 | 0.075585 | 0.225654 |
| Txndc11  | 0.315124 | 0.075644 | 0.225742 |
| Elfn2    | 1.637563 | 0.075966 | 0.226477 |
| Erbp2    | 0.415585 | 0.075997 | 0.226522 |
| Trpm4    | 0.351921 | 0.076036 | 0.226548 |
| 1110059G | 0.216529 | 0.076217 | 0.226964 |
| Tvp23b   | 0.197146 | 0.076287 | 0.227071 |
| Mrpl23   | 0.448264 | 0.076708 | 0.228098 |
| Adamts15 | 0.507199 | 0.077246 | 0.229463 |
| H1f10    | 0.617456 | 0.077271 | 0.229463 |
| Zfp277   | 0.316551 | 0.077441 | 0.229867 |
| Oxsm     | 0.623914 | 0.077531 | 0.230062 |
| Gm10644  | 1.332596 | 0.077691 | 0.230427 |
| N4bp1    | 0.152767 | 0.077811 | 0.230691 |
| Sh2b3    | 0.182599 | 0.077872 | 0.230746 |
| Bora     | 0.70302  | 0.077929 | 0.230765 |
| Cttn     | 0.212904 | 0.07808  | 0.231166 |
| U2af1l4  | 1.043037 | 0.078173 | 0.231209 |
| Art3     | 0.255794 | 0.078194 | 0.231209 |
| Chn2     | 0.23092  | 0.078186 | 0.231209 |
| Tmem181l | 0.389022 | 0.078251 | 0.231309 |
| Lsm5     | 0.193656 | 0.078283 | 0.231356 |
| Mtmr2    | 0.243064 | 0.078383 | 0.231607 |
| Map1s    | 0.363024 | 0.078447 | 0.231706 |
| Cdc34    | 0.29283  | 0.078502 | 0.231776 |

|           |          |          |          |
|-----------|----------|----------|----------|
| Zfp668    | 0.636075 | 0.078544 | 0.231827 |
| Abcb8     | 0.56274  | 0.078551 | 0.231827 |
| Isca1     | 0.289415 | 0.078647 | 0.232026 |
| Zbtb17    | 0.429152 | 0.078899 | 0.232673 |
| Nup98     | 0.209681 | 0.079185 | 0.233471 |
| L3mbtl3   | 0.318494 | 0.079224 | 0.23354  |
| Mospd3    | 0.327823 | 0.079257 | 0.233589 |
| Mcf2      | 0.198323 | 0.079284 | 0.233611 |
| Ilf2      | 0.190312 | 0.079375 | 0.233753 |
| C230037L1 | 0.664754 | 0.07946  | 0.233958 |
| Tmf1      | 0.157472 | 0.079611 | 0.234321 |
| Pafah1b1  | 0.101745 | 0.079801 | 0.234547 |
| Rwdd3     | 0.731073 | 0.079867 | 0.234631 |
| Nectin1   | 0.599092 | 0.079877 | 0.234631 |
| Chmp1a    | 0.240543 | 0.08001  | 0.234883 |
| Clic5     | 0.127887 | 0.08012  | 0.235022 |
| Pdcd4     | 0.182333 | 0.080214 | 0.235206 |
| Gm43817   | 0.734808 | 0.080368 | 0.235474 |
| 4930581F2 | 0.226239 | 0.080357 | 0.235474 |
| Tead4     | 0.318212 | 0.080647 | 0.236176 |
| Pde6d     | 0.220372 | 0.080808 | 0.236485 |
| Ripk2     | 0.390738 | 0.081104 | 0.237195 |
| Cand2     | 0.965827 | 0.081313 | 0.237497 |
| Nrde2     | 0.395995 | 0.081368 | 0.237614 |
| Pacs2     | 0.311522 | 0.081558 | 0.238029 |
| Polr1has  | 0.457453 | 0.081796 | 0.238533 |
| Os9       | 0.1863   | 0.081786 | 0.238533 |
| Srsf11    | 0.116564 | 0.081859 | 0.238533 |
| Pmm1      | 0.222642 | 0.081888 | 0.238533 |
| Fiz1      | 0.347109 | 0.081922 | 0.238533 |
| Ggact     | 0.27306  | 0.081915 | 0.238533 |
| Gm45222   | 0.454165 | 0.08196  | 0.238597 |
| Sec11c    | 0.168936 | 0.081998 | 0.238633 |
| Acd       | 0.314321 | 0.082108 | 0.238843 |
| Agpat5    | 0.203729 | 0.082106 | 0.238843 |
| Ttc23     | 0.380015 | 0.082304 | 0.239216 |
| Pgp       | 0.14986  | 0.082311 | 0.239216 |
| Gm38357   | 0.742703 | 0.082481 | 0.239554 |
| Anapc15   | 0.452933 | 0.082583 | 0.239758 |
| Zranb1    | 0.169601 | 0.082697 | 0.240042 |
| Srms      | 0.482802 | 0.082723 | 0.240043 |
| Gm14303   | 0.280574 | 0.082844 | 0.240331 |
| Tbx3      | 0.166561 | 0.082906 | 0.240416 |
| Prpf6     | 0.186614 | 0.082938 | 0.240463 |
| Sco1      | 0.608796 | 0.082997 | 0.240562 |
| Pla2g15   | 0.592037 | 0.083114 | 0.240753 |
| Itpa      | 0.278093 | 0.083229 | 0.24098  |



|          |          |          |          |
|----------|----------|----------|----------|
| Gstp1    | 0.224446 | 0.083326 | 0.241168 |
| Gm43795  | 0.432748 | 0.083375 | 0.241263 |
| Hnrnpk   | 0.087158 | 0.083451 | 0.241436 |
| Diaph2   | 0.238243 | 0.08369  | 0.241798 |
| Cdh20    | 1.578997 | 0.084104 | 0.242822 |
| 49334040 | 1.17906  | 0.084109 | 0.242822 |
| Snhg16   | 0.486199 | 0.084138 | 0.24286  |
| Ints12   | 0.40004  | 0.08418  | 0.242934 |
| Cnih1    | 0.185548 | 0.084283 | 0.243139 |
| Il15ra   | 0.373371 | 0.084762 | 0.244285 |
| Phactr1  | 0.198887 | 0.084891 | 0.244561 |
| Pcgf2    | 0.362873 | 0.08501  | 0.244812 |
| Ppm1g    | 0.184393 | 0.085111 | 0.245056 |
| Fbxw4    | 0.337427 | 0.08555  | 0.245987 |
| Tbl2     | 0.531909 | 0.085726 | 0.246447 |
| 1700066B | 2.001574 | 0.085824 | 0.246632 |
| Eif4g1   | 0.130497 | 0.085816 | 0.246632 |
| Vmac     | 0.33861  | 0.085969 | 0.246859 |
| Rbm39    | 0.074419 | 0.086272 | 0.247444 |
| 1700105P | 1.957003 | 0.086446 | 0.247755 |
| Zfp51    | 0.547277 | 0.086425 | 0.247755 |
| Ube2cbp  | 2.04534  | 0.08663  | 0.248077 |
| Atg3     | 0.210798 | 0.086526 | 0.247876 |
| Kctd18   | 0.345142 | 0.086538 | 0.247876 |
| Cdk16    | 0.213993 | 0.086749 | 0.248289 |
| Kat2b    | 0.197206 | 0.086829 | 0.248471 |
| Fabp7    | 1.511511 | 0.087112 | 0.249044 |
| Sowahc   | 0.433783 | 0.087132 | 0.249053 |
| Hmces    | 0.365434 | 0.087217 | 0.249248 |
| Inafm2   | 0.301472 | 0.087295 | 0.249424 |
| Ccm2l    | 0.161946 | 0.087519 | 0.24992  |
| Nkapl    | 0.509992 | 0.087708 | 0.250269 |
| Tada2b   | 0.290915 | 0.087795 | 0.250469 |
| Gpx7     | 0.350823 | 0.087885 | 0.250679 |
| Slc30a7  | 0.281189 | 0.087909 | 0.250699 |
| Cdc42    | 0.083485 | 0.088212 | 0.251371 |
| Mmgt1    | 0.313837 | 0.088265 | 0.251428 |
| Gm42576  | 0.491847 | 0.088352 | 0.251585 |
| Rap2a    | 0.247504 | 0.088354 | 0.251585 |
| Fundc1   | 0.258213 | 0.08871  | 0.252407 |
| Mta3     | 0.363328 | 0.088762 | 0.252508 |
| 4831440D | 1.793841 | 0.088853 | 0.252623 |
| Ilrun    | 0.173795 | 0.088896 | 0.252696 |
| lqgap2   | 1.681558 | 0.088996 | 0.252885 |
| ltpr2    | 0.175375 | 0.089136 | 0.253186 |
| Txnrd1   | 0.207679 | 0.089167 | 0.253226 |
| Mark4    | 0.275188 | 0.089214 | 0.253255 |

|           |          |          |          |
|-----------|----------|----------|----------|
| Tmem179l  | 0.265544 | 0.089228 | 0.253255 |
| Dapp1     | 0.746447 | 0.0893   | 0.253363 |
| Adam9     | 0.304372 | 0.089414 | 0.25364  |
| Hdc       | 0.804245 | 0.089513 | 0.253776 |
| 49334210  | 0.46501  | 0.089477 | 0.253723 |
| Tgfb1     | 0.20025  | 0.089649 | 0.254064 |
| Zfp839    | 0.385376 | 0.089715 | 0.254131 |
| Pomgnt1   | 0.274735 | 0.089722 | 0.254131 |
| Ak3       | 0.153913 | 0.089827 | 0.254196 |
| Ccdc122   | 0.720568 | 0.090007 | 0.254597 |
| Mpi       | 0.458758 | 0.090041 | 0.254645 |
| Eif4e2    | 0.223578 | 0.090117 | 0.254774 |
| Hmgb2     | 0.12935  | 0.09012  | 0.254774 |
| Zfp362    | 0.251251 | 0.090336 | 0.255286 |
| Svbp      | 0.204177 | 0.09049  | 0.255546 |
| Clint1    | 0.189007 | 0.090496 | 0.255546 |
| Zfp7      | 0.561834 | 0.0907   | 0.256027 |
| Tedc2     | 0.637053 | 0.090812 | 0.256294 |
| Rilpl2    | 0.339791 | 0.091346 | 0.257509 |
| Akr1b10   | 0.538293 | 0.091622 | 0.258044 |
| Fundc2    | 0.173247 | 0.09161  | 0.258044 |
| Gm18068   | 0.485379 | 0.091751 | 0.258358 |
| Tcp11l2   | 0.227522 | 0.091809 | 0.258475 |
| Gm26826   | 1.716807 | 0.091894 | 0.258575 |
| Gm45033   | 1.054663 | 0.09189  | 0.258575 |
| Npat      | 0.280193 | 0.091928 | 0.258616 |
| Casp3     | 0.511857 | 0.091969 | 0.258682 |
| Rgs19     | 0.416358 | 0.092012 | 0.258687 |
| Psma2     | 0.116602 | 0.092023 | 0.258687 |
| Gm26724   | 0.394491 | 0.09251  | 0.259763 |
| Dtnbp1    | 0.239034 | 0.092493 | 0.259763 |
| Gm7694    | 0.785465 | 0.092612 | 0.259952 |
| Ubac2     | 0.275321 | 0.092821 | 0.260165 |
| Peg13     | 0.192104 | 0.092925 | 0.260343 |
| Dleu7     | 1.27131  | 0.092982 | 0.260404 |
| Nadk      | 0.229325 | 0.093008 | 0.260429 |
| Dmwd      | 0.205471 | 0.0931   | 0.26059  |
| Mir181a-1 | 0.887247 | 0.093221 | 0.2608   |
| Hdac4     | 0.272008 | 0.093228 | 0.2608   |
| Tmem94    | 0.306786 | 0.093517 | 0.261325 |
| Prrc2c    | 0.094356 | 0.094087 | 0.262512 |
| Herpud2   | 0.181521 | 0.094102 | 0.262512 |
| L1cam     | 0.635255 | 0.094147 | 0.262588 |
| Pex16     | 0.366277 | 0.094176 | 0.262608 |
| Bloc1s3   | 0.543238 | 0.094392 | 0.263075 |
| Golt1b    | 0.340832 | 0.094661 | 0.263718 |
| Lmcd1     | 0.230905 | 0.094758 | 0.263897 |

|          |          |          |          |
|----------|----------|----------|----------|
| Gm4332   | 0.40902  | 0.094791 | 0.26394  |
| Stard13  | 0.199495 | 0.094987 | 0.264439 |
| Esrrb    | 0.343815 | 0.095076 | 0.264635 |
| Krt222   | 0.793994 | 0.095197 | 0.264874 |
| Syce2    | 0.548205 | 0.095176 | 0.264866 |
| Parvb    | 0.123789 | 0.095858 | 0.266318 |
| Trappc14 | 0.612469 | 0.09592  | 0.266392 |
| Tbcc     | 0.233294 | 0.095988 | 0.266482 |
| 4930509H | 0.451037 | 0.096973 | 0.268721 |
| Srsf2    | 0.102987 | 0.096974 | 0.268721 |
| Mpp7     | 0.25584  | 0.097064 | 0.268919 |
| Vsig10l  | 0.866507 | 0.097139 | 0.269045 |
| Gm2a     | 0.245853 | 0.097145 | 0.269045 |
| Ccnd2    | 0.141138 | 0.097201 | 0.269099 |
| Fam131a  | 0.469487 | 0.097273 | 0.26925  |
| Lap3     | 0.211627 | 0.097515 | 0.269856 |
| Rad18    | 0.574524 | 0.097785 | 0.270366 |
| Selenoi  | 0.318907 | 0.097926 | 0.270657 |
| BC051142 | 1.633818 | 0.098208 | 0.271121 |
| Uchl1    | 0.20849  | 0.098153 | 0.271084 |
| Eif5a2   | 0.424072 | 0.098203 | 0.271121 |
| Zdhhc18  | 0.197594 | 0.09831  | 0.271238 |
| 0610040B | 0.634334 | 0.098556 | 0.271631 |
| Smim14   | 0.111378 | 0.098547 | 0.271631 |
| Cpd      | 0.107956 | 0.098569 | 0.271631 |
| Rela     | 0.170088 | 0.098615 | 0.27165  |
| Slc39a13 | 0.288418 | 0.09864  | 0.27165  |
| Pgf      | 0.430266 | 0.098786 | 0.27198  |
| Mcat     | 0.448938 | 0.09881  | 0.271995 |
| Stub1    | 0.130608 | 0.098896 | 0.272182 |
| G0s2     | 0.358202 | 0.099067 | 0.272554 |
| D130040H | 0.823333 | 0.099261 | 0.27289  |
| Gpn2     | 0.442228 | 0.099326 | 0.273015 |
| 4933439C | 0.519535 | 0.099432 | 0.273254 |
| Cnksr1   | 1.653645 | 0.099619 | 0.27372  |
| Pde2a    | 0.281274 | 0.099675 | 0.273776 |
| Ncstn    | 0.207961 | 0.099684 | 0.273776 |
| Rapgef3  | 0.211154 | 0.099709 | 0.273776 |
| Gpc4     | 0.437094 | 0.099726 | 0.273776 |
| Trit1    | 0.489735 | 0.099826 | 0.273937 |
| Dag1     | 0.126648 | 0.099799 | 0.273913 |
| Pola2    | 0.366232 | 0.100034 | 0.274456 |
| Canx     | 0.113112 | 0.100105 | 0.274601 |
| Gm47370  | 1.484239 | 0.100402 | 0.275113 |
| Zfp330   | 0.222427 | 0.100532 | 0.275233 |
| Otud7b   | 0.170547 | 0.100537 | 0.275233 |
| Slc1a4   | 0.806865 | 0.100721 | 0.275483 |

|           |          |          |          |
|-----------|----------|----------|----------|
| Cmtm8     | 0.130437 | 0.100692 | 0.275466 |
| Gm43712   | 0.678058 | 0.100922 | 0.275881 |
| Zfp69     | 0.488062 | 0.101108 | 0.276289 |
| Acot9     | 0.235827 | 0.101142 | 0.276306 |
| Pa2g4     | 0.161075 | 0.101181 | 0.276337 |
| Rnf139    | 0.233406 | 0.101241 | 0.276385 |
| Bbs4      | 0.340531 | 0.101623 | 0.277127 |
| Uqcc3     | 0.14347  | 0.101637 | 0.277127 |
| Srf       | 0.43802  | 0.101757 | 0.277258 |
| Rnf165    | 0.570493 | 0.101748 | 0.277258 |
| Nfkbid    | 1.399041 | 0.101867 | 0.277451 |
| Zc3h3     | 0.406548 | 0.102204 | 0.278167 |
| Prrg3     | 0.607965 | 0.102266 | 0.278185 |
| Knstrn    | 1.178632 | 0.102499 | 0.278716 |
| Taldo1    | 0.117107 | 0.10257  | 0.27886  |
| Grb7      | 0.482703 | 0.102619 | 0.278892 |
| Srr       | 0.346754 | 0.102613 | 0.278892 |
| Homez     | 0.481375 | 0.102774 | 0.279261 |
| Pakap-2   | 0.205594 | 0.103001 | 0.279776 |
| Ttc32     | 0.304527 | 0.103281 | 0.280435 |
| Acbd3     | 0.156729 | 0.10336  | 0.280549 |
| Zbtb34    | 0.395076 | 0.103408 | 0.280627 |
| Nsg1      | 0.502976 | 0.1035   | 0.280776 |
| Tssc4     | 0.252799 | 0.103603 | 0.280952 |
| Atp8a1    | 0.151988 | 0.103712 | 0.281096 |
| Lrpap1    | 0.155026 | 0.10376  | 0.281135 |
| Adrm1     | 0.192535 | 0.103799 | 0.281179 |
| Dusp5     | 0.78395  | 0.10406  | 0.281682 |
| Cttnbp2nl | 0.14208  | 0.104216 | 0.2819   |
| Mapk6     | 0.242263 | 0.104373 | 0.282172 |
| 4833445I0 | 2.929454 | 0.10452  | 0.282319 |
| Cd53      | 2.242844 | 0.104521 | 0.282319 |
| Fbxo36    | 0.609105 | 0.104476 | 0.282319 |
| Fam171a2  | 0.417627 | 0.104514 | 0.282319 |
| Trmt1     | 0.301292 | 0.104643 | 0.282551 |
| Fez2      | 0.17202  | 0.104765 | 0.282737 |
| A930036I1 | 4.567039 | 0.105363 | 0.283926 |
| Wwp1      | 0.193078 | 0.105265 | 0.283713 |
| Gla       | 0.533179 | 0.105558 | 0.284401 |
| Pde10a    | 0.55005  | 0.105629 | 0.28454  |
| Dctpp1    | 0.27434  | 0.105728 | 0.284666 |
| Rab7      | 0.12122  | 0.105722 | 0.284666 |
| Tmem67    | 0.419845 | 0.105733 | 0.284666 |
| Cr1l      | 0.132942 | 0.105847 | 0.284872 |
| Yes1      | 0.169961 | 0.105991 | 0.285155 |
| Vcp       | 0.105369 | 0.106094 | 0.28528  |
| Mrps18c   | 0.165309 | 0.106329 | 0.28581  |

|          |          |          |          |
|----------|----------|----------|----------|
| Gatd1    | 0.300042 | 0.10641  | 0.285924 |
| Mrpl54   | 0.195022 | 0.106496 | 0.286001 |
| 2510002D | 0.183913 | 0.106663 | 0.286347 |
| Gltpt    | 0.19052  | 0.106718 | 0.286393 |
| Serhl    | 0.25563  | 0.10671  | 0.286393 |
| Gm29214  | 4.886062 | 0.106918 | 0.286774 |
| Slc35c2  | 0.51988  | 0.106898 | 0.286771 |
| Gpbp1l1  | 0.171101 | 0.106995 | 0.28693  |
| Kdelr2   | 0.166452 | 0.107023 | 0.286953 |
| Lurap1   | 0.3424   | 0.107054 | 0.286984 |
| Fam220a- | 0.423365 | 0.107237 | 0.287271 |
| Drap1    | 0.111053 | 0.107221 | 0.287271 |
| Lmf2     | 0.274597 | 0.107374 | 0.287534 |
| Mnt      | 0.291039 | 0.107503 | 0.287777 |
| Nucb1    | 0.139076 | 0.107802 | 0.288423 |
| St7      | 0.443561 | 0.108332 | 0.289531 |
| Skil     | 0.146863 | 0.108401 | 0.289662 |
| Ghdc     | 0.367638 | 0.108496 | 0.28979  |
| Ankrd34a | 0.917974 | 0.108624 | 0.290004 |
| Rac2     | 1.805551 | 0.108732 | 0.290132 |
| Nfkbil1  | 0.276677 | 0.108658 | 0.290004 |
| Rpp40    | 0.841096 | 0.108753 | 0.290137 |
| Kctd6    | 0.292915 | 0.108899 | 0.290319 |
| Rfxap    | 0.199469 | 0.10905  | 0.290601 |
| Ints7    | 0.374349 | 0.109063 | 0.290601 |
| Pycard   | 0.524625 | 0.109275 | 0.291011 |
| Nr1h3    | 0.484187 | 0.109471 | 0.291325 |
| Zfp512   | 0.243639 | 0.109582 | 0.291465 |
| Zfp994   | 0.363735 | 0.109692 | 0.291656 |
| Trim47   | 0.124012 | 0.109691 | 0.291656 |
| Prmt1    | 0.157629 | 0.109958 | 0.291869 |
| Ppp2cb   | 0.244852 | 0.109968 | 0.291869 |
| Selenos  | 0.18632  | 0.110088 | 0.292034 |
| Gmip     | 0.542396 | 0.110164 | 0.292131 |
| Gm50094  | 0.79302  | 0.11065  | 0.293129 |
| Nbeal2   | 0.334864 | 0.110915 | 0.293613 |
| Atp23    | 0.569584 | 0.110958 | 0.293613 |
| Ube2e3   | 0.140664 | 0.110942 | 0.293613 |
| Rab21    | 0.14002  | 0.110937 | 0.293613 |
| Gm46447  | 1.629512 | 0.111278 | 0.294355 |
| Unc119b  | 0.182445 | 0.111413 | 0.294505 |
| Cux1     | 0.151924 | 0.111446 | 0.294541 |
| Bloc1s6  | 0.259623 | 0.111528 | 0.294706 |
| Pop7     | 0.243061 | 0.111649 | 0.294973 |
| Rere     | 0.147692 | 0.111744 | 0.295119 |
| Eif2b2   | 0.242906 | 0.111797 | 0.295154 |
| Plek     | 0.945087 | 0.112151 | 0.295725 |

|          |          |          |          |
|----------|----------|----------|----------|
| Plod3    | 0.216431 | 0.112121 | 0.295698 |
| Met      | 1.870394 | 0.112241 | 0.295753 |
| Ccdc9    | 0.249635 | 0.112365 | 0.296027 |
| Sec62    | 0.076869 | 0.11265  | 0.296622 |
| Dnttip1  | 0.230789 | 0.112776 | 0.296808 |
| Gm43773  | 1.243408 | 0.112938 | 0.297001 |
| Gm13611  | 0.421688 | 0.112949 | 0.297001 |
| Wtap     | 0.164044 | 0.113037 | 0.29712  |
| Sap18    | 0.153799 | 0.113079 | 0.297137 |
| Pbx2     | 0.209969 | 0.113181 | 0.297341 |
| Tpp2     | 0.191346 | 0.113285 | 0.297506 |
| Ogfod3   | 0.311903 | 0.113343 | 0.297506 |
| Wwp2     | 0.260577 | 0.113586 | 0.298038 |
| Acat1    | 0.178638 | 0.113572 | 0.298038 |
| Gm14212  | 1.035373 | 0.113681 | 0.298133 |
| Rheb     | 0.112459 | 0.113672 | 0.298133 |
| Gm42571  | 0.516573 | 0.114116 | 0.299062 |
| Gmppb    | 0.394879 | 0.114839 | 0.300798 |
| 1500026H | 0.690472 | 0.11499  | 0.300985 |
| Ghr      | 0.310152 | 0.114972 | 0.300985 |
| Zfp1     | 0.354825 | 0.115087 | 0.301187 |
| Zfp326   | 0.172237 | 0.115452 | 0.301936 |
| Antxr2   | 0.71406  | 0.115572 | 0.301936 |
| Atp6v0c  | 0.093668 | 0.115535 | 0.301936 |
| Bmyc     | 0.187387 | 0.115858 | 0.302412 |
| C1qtnf12 | 0.341654 | 0.115919 | 0.302465 |
| 1600014C | 0.45955  | 0.116205 | 0.303157 |
| Coro1c   | 0.174333 | 0.11656  | 0.303979 |
| Ptdss1   | 0.272762 | 0.116974 | 0.304733 |
| Tmem147  | 0.167416 | 0.116964 | 0.304733 |
| Alg2     | 0.318583 | 0.117209 | 0.305191 |
| Dynlt2b  | 0.286132 | 0.117454 | 0.30556  |
| Mrps18b  | 0.352802 | 0.117493 | 0.30556  |
| B230206L | 0.975637 | 0.117537 | 0.305568 |
| Brd1     | 0.143493 | 0.117516 | 0.305565 |
| Nsd2     | 0.212334 | 0.11777  | 0.306121 |
| Slc26a6  | 1.036312 | 0.117884 | 0.30631  |
| Dhrs13   | 0.677482 | 0.117865 | 0.30631  |
| Ttyh3    | 0.37146  | 0.117968 | 0.306374 |
| Hecw2    | 0.379645 | 0.118033 | 0.306483 |
| Prr36    | 1.738012 | 0.118134 | 0.306605 |
| Trmt61b  | 0.452379 | 0.118141 | 0.306605 |
| Spef2    | 2.21369  | 0.118302 | 0.306865 |
| Exosc5   | 0.25034  | 0.118256 | 0.306851 |
| Gm44834  | 1.296556 | 0.118401 | 0.307013 |
| Eva1b    | 0.13571  | 0.118391 | 0.307013 |
| Gm42690  | 1.170669 | 0.118591 | 0.307402 |

|           |          |          |          |
|-----------|----------|----------|----------|
| Pank2     | 0.22415  | 0.118713 | 0.307557 |
| Lamtor2   | 0.120583 | 0.118855 | 0.307872 |
| Ccdc148   | 0.601361 | 0.119114 | 0.308435 |
| Wac       | 0.122716 | 0.119162 | 0.308506 |
| Gm4356    | 0.620784 | 0.119203 | 0.30856  |
| Aldh3a2   | 0.247576 | 0.119379 | 0.308962 |
| Trappc3   | 0.170887 | 0.119464 | 0.309076 |
| Srd5a1    | 0.76351  | 0.119554 | 0.309253 |
| Sirpa     | 0.408717 | 0.119662 | 0.309481 |
| Paqr3     | 0.730468 | 0.119826 | 0.309689 |
| Arnt      | 0.191268 | 0.120141 | 0.310129 |
| Coq8b     | 0.488789 | 0.120457 | 0.310892 |
| Uap1      | 0.193049 | 0.120578 | 0.311097 |
| Tent5c    | 0.992426 | 0.120718 | 0.311377 |
| Elovl1    | 0.200931 | 0.120825 | 0.311573 |
| Ppia      | 0.057475 | 0.120952 | 0.311793 |
| Lamb1     | 0.323944 | 0.121675 | 0.313333 |
| Ppp1cc    | 0.175596 | 0.121852 | 0.313695 |
| Hes6      | 0.341191 | 0.122032 | 0.31393  |
| Foxred1   | 0.479838 | 0.122271 | 0.314245 |
| Gatad2b   | 0.132219 | 0.12256  | 0.3148   |
| 2410002F2 | 0.337509 | 0.12296  | 0.315499 |
| Pnpla7    | 0.784765 | 0.123531 | 0.316719 |
| Cst6      | 0.719506 | 0.123582 | 0.316719 |
| Entpd6    | 0.635416 | 0.123578 | 0.316719 |
| Rbm8a     | 0.108579 | 0.123582 | 0.316719 |
| Brwd3     | 0.258346 | 0.123611 | 0.316738 |
| Med4      | 0.180655 | 0.123695 | 0.3169   |
| Nfxl1     | 0.358154 | 0.123767 | 0.31703  |
| Rps2-ps10 | 0.525731 | 0.123814 | 0.317096 |
| ENSMUSG1  | 0.64307  | 0.123894 | 0.317246 |
| Nxph4     | 0.628542 | 0.123919 | 0.317257 |
| Zbtb46    | 0.193892 | 0.124028 | 0.31748  |
| Gm15270   | 0.378925 | 0.124104 | 0.317568 |
| Mtg1      | 0.394914 | 0.124349 | 0.317991 |
| Gm16751   | 0.747784 | 0.124528 | 0.31819  |
| Coq3      | 0.440062 | 0.124525 | 0.31819  |
| Fkbp14    | 0.391298 | 0.124519 | 0.31819  |
| Coro7     | 0.328907 | 0.124539 | 0.31819  |
| Slfn2     | 0.306313 | 0.124676 | 0.318379 |
| Pgap3     | 0.556174 | 0.124969 | 0.31891  |
| Dtd2      | 0.26797  | 0.125011 | 0.318961 |
| Ncmap     | 1.647098 | 0.125686 | 0.320248 |
| Gstm1     | 0.134987 | 0.125677 | 0.320248 |
| Cilk1     | 0.17101  | 0.125682 | 0.320248 |
| Maz       | 0.181009 | 0.125823 | 0.320432 |
| Plpp3     | 0.17888  | 0.126416 | 0.32155  |

|           |          |          |          |
|-----------|----------|----------|----------|
| Snhg5     | 0.34117  | 0.126455 | 0.32155  |
| 6720489N  | 0.991079 | 0.126486 | 0.321575 |
| Mob2      | 0.168729 | 0.126566 | 0.321613 |
| Ipo11     | 0.25342  | 0.126681 | 0.321771 |
| Gm8692    | 0.968944 | 0.127111 | 0.322504 |
| E230029C  | 0.701913 | 0.127139 | 0.322504 |
| Ptprc     | 1.669122 | 0.127204 | 0.322523 |
| Sdf4      | 0.108587 | 0.127136 | 0.322504 |
| Gabarapl1 | 0.119567 | 0.127178 | 0.322513 |
| Gm47479   | 0.517156 | 0.127674 | 0.323276 |
| Ppp1r10   | 0.178218 | 0.127701 | 0.323291 |
| Lgals3bp  | 0.193994 | 0.12791  | 0.323654 |
| Apobec2   | 1.08034  | 0.128258 | 0.324263 |
| Apol10b   | 0.38685  | 0.128363 | 0.324283 |
| Proser1   | 0.249032 | 0.128374 | 0.324283 |
| Cbll1     | 0.200034 | 0.128413 | 0.324324 |
| Lonrf2    | 1.31115  | 0.128733 | 0.324861 |
| Sin3b     | 0.14171  | 0.128673 | 0.324789 |
| Galc      | 0.365107 | 0.128683 | 0.324789 |
| Gm15708   | 1.019276 | 0.128795 | 0.324899 |
| Dcaf4     | 0.525715 | 0.128851 | 0.324907 |
| Cox11     | 0.325453 | 0.129151 | 0.325474 |
| Rars2     | 0.397192 | 0.129214 | 0.325545 |
| Cxxc5     | 0.265473 | 0.129248 | 0.325545 |
| Gm11478   | 0.180057 | 0.129295 | 0.325545 |
| Fbxl20    | 0.231202 | 0.129328 | 0.325545 |
| Slc30a4   | 0.254361 | 0.129331 | 0.325545 |
| Rpl7-ps9  | 0.406251 | 0.129421 | 0.325661 |
| Fam114a2  | 0.159509 | 0.129667 | 0.326173 |
| Rnf169    | 0.22326  | 0.129702 | 0.326204 |
| Synj2     | 0.496486 | 0.13003  | 0.326866 |
| Gm11532   | 1.116508 | 0.130287 | 0.32734  |
| Tnfaip1   | 0.114098 | 0.130253 | 0.327316 |
| Ccdc88a   | 0.137877 | 0.130578 | 0.327858 |
| Dld       | 0.165842 | 0.130899 | 0.328389 |
| Ddx54     | 0.178415 | 0.131077 | 0.328781 |
| Slc25a23  | 0.243106 | 0.131113 | 0.328816 |
| Zfp414    | 0.352628 | 0.131164 | 0.328854 |
| Tbx3os1   | 0.275847 | 0.131472 | 0.329275 |
| Suc1g2    | 0.20858  | 0.131527 | 0.3293   |
| Psmc9     | 0.200235 | 0.131667 | 0.329543 |
| Rala      | 0.119593 | 0.131888 | 0.329873 |
| Adgre5    | 0.124774 | 0.132185 | 0.330484 |
| Tmub2     | 0.260564 | 0.132282 | 0.330529 |
| Tada3     | 0.261998 | 0.132571 | 0.331128 |
| Ankrd12   | 0.097075 | 0.132655 | 0.331128 |
| Strn3     | 0.107316 | 0.132877 | 0.331518 |



|           |          |          |          |
|-----------|----------|----------|----------|
| Olfm2     | 0.684062 | 0.133139 | 0.332004 |
| Slc25a53  | 0.499288 | 0.133219 | 0.332149 |
| 1500015A  | 0.496267 | 0.133265 | 0.332165 |
| Casc3     | 0.181371 | 0.13327  | 0.332165 |
| Prdx3     | 0.196399 | 0.1334   | 0.332379 |
| 1110013H  | 1.087779 | 0.13347  | 0.332443 |
| Slc35c1   | 0.582459 | 0.133701 | 0.332809 |
| 4930590JC | 1.088788 | 0.133863 | 0.332978 |
| Eil       | 0.3022   | 0.133844 | 0.332978 |
| Lrp4      | 0.449669 | 0.133887 | 0.33298  |
| Pex11g    | 0.642426 | 0.133932 | 0.33298  |
| Kdm3a     | 0.20281  | 0.133953 | 0.33298  |
| Mcrip2    | 0.474926 | 0.133976 | 0.332982 |
| Lrrfip1   | 0.161303 | 0.134027 | 0.333053 |
| Scpep1    | 0.299007 | 0.134302 | 0.33357  |
| Pex5      | 0.317815 | 0.134684 | 0.334223 |
| Gm36930   | 1.25632  | 0.134723 | 0.334223 |
| Galnt18   | 0.321777 | 0.134711 | 0.334223 |
| Ptpn9     | 0.216183 | 0.134743 | 0.334223 |
| Rbx1      | 0.087238 | 0.134848 | 0.334387 |
| Slc4a8    | 0.39509  | 0.13509  | 0.334806 |
| Clip2     | 0.349277 | 0.135247 | 0.33496  |
| Nupr1l    | 0.462001 | 0.13539  | 0.334995 |
| Trmt10c   | 0.273276 | 0.135433 | 0.335046 |
| A230072E  | 1.358727 | 0.135758 | 0.335408 |
| Scly      | 0.392197 | 0.136003 | 0.335776 |
| Tspan3    | 0.126196 | 0.136273 | 0.336292 |
| A230056P  | 1.436999 | 0.136396 | 0.336373 |
| Slc7a6os  | 0.319752 | 0.13638  | 0.336373 |
| Adap2     | 0.213362 | 0.136489 | 0.336548 |
| Wwox      | 0.29329  | 0.136729 | 0.337027 |
| Prss56    | 1.121445 | 0.136836 | 0.337201 |
| Noct      | 0.303088 | 0.136975 | 0.337301 |
| Selenof   | 0.077235 | 0.13696  | 0.337301 |
| Ddx59     | 0.547464 | 0.137237 | 0.337746 |
| Slc25a12  | 0.243245 | 0.137246 | 0.337746 |
| Cdpf1     | 0.374368 | 0.137315 | 0.337804 |
| Gm26709   | 1.904525 | 0.137525 | 0.338154 |
| Frmd4a    | 0.249739 | 0.137514 | 0.338154 |
| Nrg2      | 0.921712 | 0.137736 | 0.338563 |
| Dlat      | 0.223676 | 0.137899 | 0.338797 |
| Fahd2a    | 0.307362 | 0.137945 | 0.338853 |
| Lpcat4    | 0.423223 | 0.138237 | 0.33946  |
| Ppp6c     | 0.162309 | 0.138327 | 0.339623 |
| Mpp1      | 0.225753 | 0.138349 | 0.339623 |
| Hspb6     | 0.34234  | 0.138685 | 0.340226 |
| Ccdc92    | 0.633574 | 0.138873 | 0.340472 |

|           |          |          |          |
|-----------|----------|----------|----------|
| Nipal1    | 0.846655 | 0.139129 | 0.340812 |
| Mapk3     | 0.105166 | 0.139126 | 0.340812 |
| Lrp3      | 0.585701 | 0.139214 | 0.340963 |
| Marchf9   | 0.381404 | 0.139338 | 0.34118  |
| Mast4     | 0.096122 | 0.139348 | 0.34118  |
| Soga1     | 0.345584 | 0.139481 | 0.341395 |
| Unk       | 0.291078 | 0.139565 | 0.341543 |
| Acp5      | 0.559473 | 0.139907 | 0.342269 |
| Cutc      | 0.302705 | 0.139878 | 0.342255 |
| Me2       | 0.338692 | 0.140048 | 0.342559 |
| Lats2     | 0.125685 | 0.140117 | 0.342672 |
| Rpusd3    | 0.472617 | 0.140169 | 0.342686 |
| Mapk7     | 0.372709 | 0.140157 | 0.342686 |
| Gm35842   | 2.285418 | 0.140339 | 0.342967 |
| Pcdhb22   | 0.865677 | 0.140351 | 0.342967 |
| Rcn1      | 0.229378 | 0.140801 | 0.343615 |
| Acsl6     | 0.307047 | 0.140967 | 0.343908 |
| Map3k5    | 0.288724 | 0.141058 | 0.34401  |
| Gys1      | 0.560612 | 0.141506 | 0.344819 |
| Mrpl15    | 0.173964 | 0.141548 | 0.344819 |
| Tspan15   | 0.334674 | 0.141582 | 0.344846 |
| Mepce     | 0.215737 | 0.141666 | 0.344938 |
| Edem2     | 0.2604   | 0.141994 | 0.345568 |
| Napepld   | 0.271182 | 0.142758 | 0.346976 |
| Eif2d     | 0.339027 | 0.142848 | 0.347108 |
| Gm37238   | 0.332263 | 0.142905 | 0.347108 |
| Bak1      | 0.247162 | 0.142884 | 0.347108 |
| Hip1      | 0.088981 | 0.142943 | 0.347145 |
| Gtpbp1    | 0.286541 | 0.143116 | 0.347451 |
| 2610507B  | 0.154073 | 0.143292 | 0.34771  |
| Paip1     | 0.155169 | 0.14333  | 0.347746 |
| Gsto1     | 0.466473 | 0.143445 | 0.347969 |
| Tfpt      | 0.328023 | 0.143825 | 0.348551 |
| Ube2e2    | 0.262391 | 0.143822 | 0.348551 |
| Faap20    | 0.218065 | 0.143934 | 0.348703 |
| Psmd11    | 0.127141 | 0.144003 | 0.348813 |
| Gadd45gip | 0.177062 | 0.144581 | 0.349772 |
| Atpif1    | 0.105193 | 0.144586 | 0.349772 |
| Cd2ap     | 0.077734 | 0.14475  | 0.350056 |
| Cep57     | 0.197815 | 0.144779 | 0.350069 |
| Kctd12b   | 0.152466 | 0.145356 | 0.351239 |
| Egf       | 1.320784 | 0.14557  | 0.351564 |
| Kbtbd4    | 0.309387 | 0.146136 | 0.352609 |
| Gpat4     | 0.223924 | 0.146298 | 0.352773 |
| Pgm1      | 0.286829 | 0.146432 | 0.352986 |
| Cerox1    | 0.602363 | 0.14691  | 0.353965 |
| Kansl1    | 0.133937 | 0.147195 | 0.354424 |

|          |          |          |          |
|----------|----------|----------|----------|
| Nfs1     | 0.244207 | 0.147285 | 0.35447  |
| Myh11    | 0.201786 | 0.147259 | 0.354464 |
| Mcts2    | 0.347532 | 0.147314 | 0.354481 |
| Gm4924   | 0.580352 | 0.147502 | 0.354706 |
| Ccdc32   | 0.234766 | 0.147561 | 0.354734 |
| Capn12   | 0.611367 | 0.147662 | 0.354864 |
| Top1     | 0.10183  | 0.147686 | 0.354864 |
| Edc3     | 0.311063 | 0.147725 | 0.354899 |
| Mier3    | 0.2228   | 0.148125 | 0.355689 |
| Orai2    | 0.814925 | 0.148298 | 0.355831 |
| Dnttip2  | 0.139111 | 0.148256 | 0.355831 |
| Parp16   | 0.487837 | 0.148374 | 0.355831 |
| Pfdn6    | 0.139911 | 0.148362 | 0.355831 |
| Pmpcb    | 0.178783 | 0.148587 | 0.356236 |
| Hdx      | 0.83248  | 0.148649 | 0.356262 |
| Gm37588  | 2.106643 | 0.148729 | 0.356397 |
| Bscl2    | 0.219696 | 0.148803 | 0.356448 |
| Pcbp1    | 0.094468 | 0.148821 | 0.356448 |
| Zfp799   | 0.446313 | 0.149052 | 0.356829 |
| Gm26930  | 0.60262  | 0.149095 | 0.356874 |
| Zfp39    | 0.488314 | 0.149135 | 0.356913 |
| Gm17971  | 0.686851 | 0.14946  | 0.357634 |
| Gm14586  | 0.635734 | 0.149551 | 0.357737 |
| Tcerg1   | 0.155913 | 0.149527 | 0.357737 |
| Gm11837  | 1.107879 | 0.149774 | 0.358214 |
| Xrcc4    | 0.260661 | 0.150149 | 0.358824 |
| Zkscan17 | 0.261319 | 0.150905 | 0.359971 |
| Hk1os    | 0.884893 | 0.150959 | 0.360013 |
| Sgcb     | 0.305046 | 0.151074 | 0.360173 |
| Cpox     | 0.251447 | 0.151342 | 0.360689 |
| Tes      | 0.197768 | 0.151363 | 0.360689 |
| Src      | 0.272857 | 0.151406 | 0.360734 |
| Nnat     | 0.628176 | 0.15149  | 0.360774 |
| Tmem65   | 0.176612 | 0.151606 | 0.360922 |
| Psm3     | 0.158805 | 0.152122 | 0.361928 |
| Sppl3    | 0.179138 | 0.152272 | 0.362163 |
| Pcdhgb4  | 0.512875 | 0.152365 | 0.362215 |
| Qk       | 0.066274 | 0.152366 | 0.362215 |
| Map2k3os | 1.104356 | 0.152556 | 0.362608 |
| Pggt1b   | 0.133161 | 0.152582 | 0.362612 |
| Zfp574   | 0.290277 | 0.153141 | 0.363653 |
| Rbbp9    | 0.23054  | 0.153218 | 0.363777 |
| Plac8    | 1.352185 | 0.153352 | 0.363972 |
| Zfp791   | 0.975532 | 0.153622 | 0.364274 |
| Helz2    | 0.216231 | 0.153752 | 0.364526 |
| Tmem25   | 1.646887 | 0.153842 | 0.364622 |
| Zfp513   | 0.29103  | 0.153939 | 0.364795 |

|          |          |          |          |
|----------|----------|----------|----------|
| Trmt112  | 0.145327 | 0.15403  | 0.364952 |
| Snta1    | 0.284046 | 0.154179 | 0.365195 |
| Twf1     | 0.168198 | 0.154243 | 0.36525  |
| Wdr74    | 0.294724 | 0.154281 | 0.36525  |
| Smim27   | 0.194355 | 0.154325 | 0.36525  |
| Rad51ap1 | 0.622693 | 0.154415 | 0.365402 |
| Rpp38    | 0.516895 | 0.154495 | 0.365534 |
| Sec22a   | 0.217858 | 0.1547   | 0.36596  |
| Pex3     | 0.246372 | 0.154858 | 0.36622  |
| Cgrf1    | 0.206053 | 0.154888 | 0.366223 |
| Gm38126  | 0.741165 | 0.154977 | 0.366327 |
| Gm43430  | 0.508272 | 0.155023 | 0.366377 |
| Card10   | 0.152713 | 0.155204 | 0.366747 |
| Rmnd5b   | 0.210846 | 0.155764 | 0.367839 |
| Mief2    | 0.516525 | 0.15582  | 0.367913 |
| Sh3bp1   | 0.753788 | 0.155945 | 0.368151 |
| Bad      | 0.161978 | 0.15608  | 0.368354 |
| Gm36266  | 1.044856 | 0.156233 | 0.368598 |
| Mthfs    | 0.382521 | 0.156451 | 0.368995 |
| Prickle3 | 0.304365 | 0.15658  | 0.369242 |
| Pdhx     | 0.29609  | 0.156735 | 0.369491 |
| Rad51c   | 0.625676 | 0.156768 | 0.369511 |
| Mrpl43   | 0.145809 | 0.157114 | 0.369943 |
| Cibar1   | 0.182773 | 0.157474 | 0.370533 |
| Babam1   | 0.182846 | 0.157604 | 0.370664 |
| Asb8     | 0.256266 | 0.157652 | 0.370719 |
| Snx13    | 0.174937 | 0.157699 | 0.37077  |
| Cers2    | 0.146937 | 0.157875 | 0.371126 |
| Nup62    | 0.275795 | 0.157926 | 0.371188 |
| Ubap2    | 0.160963 | 0.15803  | 0.371317 |
| Adgrb3   | 1.373917 | 0.158236 | 0.371626 |
| Mks1     | 0.606712 | 0.158516 | 0.372022 |
| Brap     | 0.222856 | 0.158531 | 0.372022 |
| Ganab    | 0.163504 | 0.158606 | 0.372022 |
| Tfeb     | 0.226829 | 0.158653 | 0.372022 |
| Zfp438   | 0.457884 | 0.158709 | 0.372094 |
| Wdr75    | 0.236701 | 0.158799 | 0.372188 |
| Txndc15  | 0.144981 | 0.158799 | 0.372188 |
| Fstl3    | 0.434844 | 0.158864 | 0.372283 |
| Mvb12a   | 0.180453 | 0.158934 | 0.372331 |
| Pthr2    | 0.273583 | 0.159319 | 0.373114 |
| Shld3    | 0.634653 | 0.159368 | 0.373114 |
| Bcl7a    | 0.510129 | 0.16012  | 0.37423  |
| Cd44     | 0.65237  | 0.160207 | 0.374376 |
| Cybc1    | 0.293033 | 0.160292 | 0.374515 |
| Prkab1   | 0.210515 | 0.160371 | 0.374524 |
| Zfp429   | 0.494779 | 0.160674 | 0.374765 |

|           |          |          |          |
|-----------|----------|----------|----------|
| Slc10a3   | 0.377015 | 0.161163 | 0.375496 |
| Zcchc3    | 0.29108  | 0.161355 | 0.375811 |
| 2310039H  | 0.213592 | 0.161531 | 0.376118 |
| Nectin3   | 0.256247 | 0.16171  | 0.376219 |
| Pou5f2    | 0.573659 | 0.161819 | 0.376223 |
| Vav3      | 0.878131 | 0.161813 | 0.376223 |
| Gm49058   | 0.552759 | 0.161821 | 0.376223 |
| Gm17229   | 0.466899 | 0.161917 | 0.376373 |
| Marchf6   | 0.134759 | 0.16201  | 0.37653  |
| Pkn3      | 0.27667  | 0.162194 | 0.376842 |
| 1700123V  | 0.665661 | 0.162322 | 0.377008 |
| Rps13-ps4 | 1.554466 | 0.162685 | 0.37724  |
| Efcab14   | 0.136349 | 0.162693 | 0.37724  |
| Baz2a     | 0.135796 | 0.162687 | 0.37724  |
| Hsp90b1   | 0.071914 | 0.162729 | 0.377265 |
| Faap24    | 0.601662 | 0.162923 | 0.377564 |
| Tomm20    | 0.090426 | 0.163006 | 0.377616 |
| Faap100   | 0.329382 | 0.163231 | 0.377962 |
| Cep19     | 0.264299 | 0.163226 | 0.377962 |
| Ago1      | 0.206779 | 0.163463 | 0.378322 |
| Samd8     | 0.153046 | 0.163558 | 0.378426 |
| Ydjc      | 1.045139 | 0.163622 | 0.378514 |
| Dnajc8    | 0.097028 | 0.16367  | 0.378568 |
| Gm20257   | 0.577    | 0.163724 | 0.378576 |
| Surf1     | 0.183007 | 0.163722 | 0.378576 |
| Gpr157    | 0.552111 | 0.163897 | 0.378801 |
| Ino80c    | 0.271998 | 0.163888 | 0.378801 |
| Wdyhv1    | 0.428016 | 0.164221 | 0.379374 |
| Man2b2    | 0.316595 | 0.164263 | 0.379411 |
| Amfr      | 0.135201 | 0.164463 | 0.379757 |
| Tmem241   | 0.427588 | 0.164942 | 0.380687 |
| Mmadhc    | 0.197185 | 0.165257 | 0.381077 |
| Alyref2   | 0.364216 | 0.165691 | 0.381827 |
| Rangrf    | 0.340608 | 0.165783 | 0.38192  |
| Slc22a23  | 0.90518  | 0.166057 | 0.382316 |
| Spata2l   | 0.701117 | 0.166128 | 0.38239  |
| Scd3      | 1.995389 | 0.166358 | 0.382674 |
| Yjefn3    | 1.077895 | 0.166366 | 0.382674 |
| Pdcd10    | 0.102159 | 0.166502 | 0.382753 |
| Lgals3    | 0.706307 | 0.16659  | 0.38277  |
| Zfp747    | 0.496945 | 0.166604 | 0.38277  |
| Gm12059   | 1.006863 | 0.167056 | 0.383497 |
| Neil2     | 1.217428 | 0.167193 | 0.38359  |
| Mecr      | 0.338614 | 0.16726  | 0.383669 |
| Pcdhb11   | 0.853015 | 0.16772  | 0.384549 |
| Coil      | 0.376795 | 0.16797  | 0.385003 |
| Pdlim2    | 0.213873 | 0.168063 | 0.3851   |

|            |          |          |          |
|------------|----------|----------|----------|
| Rab11fip3  | 0.263805 | 0.168159 | 0.385202 |
| Polr1c     | 0.225314 | 0.168265 | 0.385386 |
| Dhodh      | 0.372442 | 0.16848  | 0.385759 |
| Ppm1k      | 0.256604 | 0.168615 | 0.38601  |
| Crybg1     | 0.263888 | 0.168695 | 0.386075 |
| Gm37983    | 1.090746 | 0.168949 | 0.386437 |
| Lxn        | 0.194003 | 0.168951 | 0.386437 |
| Ndufv2     | 0.117531 | 0.168957 | 0.386437 |
| Plcg1      | 0.129288 | 0.169108 | 0.386725 |
| Gpi-ps     | 1.190796 | 0.169384 | 0.387177 |
| Gm43541    | 2.089129 | 0.169674 | 0.387486 |
| Rabep2     | 0.258675 | 0.169557 | 0.387396 |
| Lin7b      | 1.180888 | 0.169879 | 0.387793 |
| Zbtb3      | 0.909282 | 0.169897 | 0.387793 |
| Nr4a2      | 0.20488  | 0.170102 | 0.38799  |
| Pus7       | 0.336374 | 0.170549 | 0.388714 |
| Zswim4     | 0.419528 | 0.170576 | 0.388716 |
| Rab9       | 0.150227 | 0.170727 | 0.388881 |
| Suc1g1     | 0.130478 | 0.170766 | 0.388911 |
| 4930532G   | 1.375267 | 0.170922 | 0.38915  |
| Calr3      | 0.581388 | 0.171003 | 0.389273 |
| Aldh18a1   | 0.690488 | 0.171187 | 0.389607 |
| Gm29844    | 18.62954 | 0.171428 | 0.389932 |
| Gnb2       | 0.076513 | 0.171349 | 0.389883 |
| Mettl21a   | 0.387404 | 0.171503 | 0.389932 |
| Il1rap     | 0.413721 | 0.171579 | 0.389932 |
| Gm43254    | 0.823531 | 0.171636 | 0.389944 |
| Dnajb6     | 0.104401 | 0.171577 | 0.389932 |
| Zfp655     | 0.207278 | 0.171633 | 0.389944 |
| Pxmp2      | 0.438613 | 0.171879 | 0.390319 |
| Mrpl4      | 0.151079 | 0.172232 | 0.390988 |
| Eral1      | 0.407904 | 0.17239  | 0.391183 |
| Rtcb       | 0.136636 | 0.172374 | 0.391183 |
| Gm45345    | 0.640186 | 0.172495 | 0.391303 |
| Pef1       | 0.244086 | 0.172539 | 0.391342 |
| St6galnac2 | 0.946516 | 0.173086 | 0.392346 |
| Prodh      | 0.302521 | 0.173113 | 0.392348 |
| Fn3krp     | 0.532311 | 0.173189 | 0.39246  |
| Ap2a2      | 0.129439 | 0.173308 | 0.392612 |
| Gle1       | 0.16907  | 0.173382 | 0.392711 |
| Poglut3    | 0.226389 | 0.173613 | 0.393037 |
| Lgals9     | 0.126398 | 0.173772 | 0.393278 |
| Gramd1a    | 0.230875 | 0.173875 | 0.393419 |
| A930005G   | 0.306934 | 0.174527 | 0.394536 |
| Ift27      | 0.197041 | 0.174715 | 0.394844 |
| Gm45406    | 1.436431 | 0.175088 | 0.395388 |
| Sergef     | 0.476108 | 0.175257 | 0.39571  |

|          |          |          |          |
|----------|----------|----------|----------|
| Nif3l1   | 0.488982 | 0.175499 | 0.395862 |
| Nrbp1    | 0.11779  | 0.175465 | 0.395862 |
| Gm44958  | 1.660807 | 0.175627 | 0.396067 |
| Cttnbp2  | 0.267871 | 0.17584  | 0.396427 |
| Trim13   | 0.439651 | 0.175964 | 0.396527 |
| Slc19a2  | 0.602508 | 0.176546 | 0.397539 |
| Arap3    | 0.10919  | 0.176577 | 0.39755  |
| Bcor     | 0.194713 | 0.176623 | 0.397595 |
| Nova2    | 0.141652 | 0.176982 | 0.398163 |
| Ppp1r3d  | 0.53996  | 0.177011 | 0.398169 |
| Dpp9     | 0.220028 | 0.177189 | 0.398389 |
| Ypel5    | 0.165151 | 0.177232 | 0.398426 |
| Eola1    | 0.260055 | 0.177395 | 0.398612 |
| Eif3l    | 0.155546 | 0.17757  | 0.398779 |
| Gm50203  | 2.049485 | 0.177742 | 0.398889 |
| Pqlc3    | 0.517698 | 0.177728 | 0.398889 |
| A530064N | 1.079957 | 0.177757 | 0.398889 |
| Lyplal1  | 0.644162 | 0.1778   | 0.398924 |
| 4930577N | 1.107999 | 0.178254 | 0.399705 |
| Gm15697  | 1.500277 | 0.178511 | 0.399835 |
| Mcu      | 0.307214 | 0.178534 | 0.399835 |
| Cyrib    | 0.223019 | 0.178512 | 0.399835 |
| Akirin2  | 0.136286 | 0.178553 | 0.399835 |
| MLxip    | 1.356857 | 0.178676 | 0.39999  |
| Tmem258  | 0.12569  | 0.178746 | 0.400061 |
| Gtf3c1   | 0.186704 | 0.178761 | 0.400061 |
| Wdr59    | 0.310622 | 0.178844 | 0.400187 |
| Ccdc6    | 0.223691 | 0.178871 | 0.400187 |
| Myo1b    | 0.098491 | 0.179009 | 0.400436 |
| Ttc17    | 0.240195 | 0.179117 | 0.400558 |
| Gm43312  | 0.532474 | 0.179178 | 0.400636 |
| Ralyl    | 2.301731 | 0.179358 | 0.400836 |
| Crip2    | 0.063259 | 0.179763 | 0.401463 |
| Avl9     | 0.141862 | 0.179965 | 0.401731 |
| Amdhd2   | 0.340956 | 0.180115 | 0.40189  |
| Mtor     | 0.199167 | 0.180225 | 0.402077 |
| Camk1d   | 0.318811 | 0.180309 | 0.402143 |
| Ube2l3   | 0.107442 | 0.180521 | 0.402494 |
| Atf6     | 0.190226 | 0.180547 | 0.402494 |
| 4933407K | 0.432362 | 0.180924 | 0.403153 |
| Polr3g   | 0.652981 | 0.180995 | 0.403253 |
| Cadm4    | 0.543766 | 0.181044 | 0.403302 |
| Alkbh3   | 0.28431  | 0.181194 | 0.403576 |
| Gm15417  | 0.352703 | 0.181254 | 0.40365  |
| Tmem128  | 0.146921 | 0.181361 | 0.403827 |
| 5830462O | 1.026593 | 0.18181  | 0.40466  |
| Gm15860  | 0.962698 | 0.182416 | 0.405513 |

|          |          |          |          |
|----------|----------|----------|----------|
| Lamc3    | 0.198731 | 0.182587 | 0.405773 |
| Mettl6   | 0.240866 | 0.18279  | 0.40616  |
| Surf2    | 0.265471 | 0.182838 | 0.40616  |
| Ubr2     | 0.122019 | 0.182843 | 0.40616  |
| Tpgs1    | 0.197647 | 0.183287 | 0.406966 |
| Cmc2     | 0.19988  | 0.183627 | 0.407584 |
| Ccdc103  | 1.29589  | 0.183743 | 0.407623 |
| Gm21992  | 0.967135 | 0.183773 | 0.407623 |
| 4933440N | 0.553703 | 0.183826 | 0.407678 |
| Colgalt1 | 0.149097 | 0.184294 | 0.408414 |
| Cdh16    | 0.666983 | 0.184416 | 0.408564 |
| Lman1    | 0.103289 | 0.184601 | 0.408913 |
| AU021092 | 0.088583 | 0.184832 | 0.409303 |
| Acvr1b   | 0.507957 | 0.18506  | 0.409721 |
| Mpzl3    | 1.142155 | 0.18548  | 0.410253 |
| Fam71f2  | 1.459716 | 0.185556 | 0.410361 |
| Ext2     | 0.15268  | 0.185628 | 0.41046  |
| Zfyve1   | 0.30086  | 0.185744 | 0.410521 |
| Sugp1    | 0.233224 | 0.185754 | 0.410521 |
| Fut10    | 0.39254  | 0.185765 | 0.410521 |
| Fam76b   | 0.145714 | 0.186044 | 0.410812 |
| Abcf3    | 0.207809 | 0.186089 | 0.410812 |
| Gm5644   | 0.72377  | 0.186356 | 0.411279 |
| 9530078K | 0.739778 | 0.186606 | 0.411608 |
| Armcx4   | 0.293239 | 0.186808 | 0.411905 |
| Rasa4    | 0.770189 | 0.187217 | 0.412571 |
| Zbtb45   | 0.316481 | 0.187424 | 0.4129   |
| Gm15510  | 0.760968 | 0.187459 | 0.4129   |
| Setd3    | 0.135728 | 0.187531 | 0.412961 |
| Pi4k2b   | 0.424582 | 0.187714 | 0.413265 |
| Gpank1   | 0.236563 | 0.187725 | 0.413265 |
| Gm14399  | 0.660815 | 0.188034 | 0.413884 |
| Glt28d2  | 0.485993 | 0.188245 | 0.414166 |
| Gnl3     | 0.179425 | 0.188238 | 0.414166 |
| Desi2    | 0.141787 | 0.18851  | 0.414505 |
| Siae     | 0.357957 | 0.188693 | 0.414825 |
| U2af1    | 0.116634 | 0.188909 | 0.415079 |
| Tlcd1    | 0.587854 | 0.189086 | 0.415177 |
| Mogs     | 0.317881 | 0.189081 | 0.415177 |
| Dusp22   | 0.151602 | 0.189092 | 0.415177 |
| Zfp433   | 1.376998 | 0.189354 | 0.415405 |
| Afap1    | 0.193696 | 0.18932  | 0.415405 |
| Cep83os  | 0.439892 | 0.189362 | 0.415405 |
| Ola1     | 0.173088 | 0.189363 | 0.415405 |
| D130017N | 0.827479 | 0.189589 | 0.41584  |
| Anxa6    | 0.134854 | 0.189619 | 0.415846 |
| Gm49309  | 1.479693 | 0.189881 | 0.416213 |



|           |          |          |          |
|-----------|----------|----------|----------|
| Gm14023   | 1.404972 | 0.189882 | 0.416213 |
| Rpap2     | 0.293958 | 0.190246 | 0.416671 |
| Eri2      | 0.526741 | 0.190459 | 0.416856 |
| Zfp580    | 0.24048  | 0.190496 | 0.416856 |
| Rab31     | 0.25022  | 0.190552 | 0.416856 |
| Wipi1     | 0.142853 | 0.190532 | 0.416856 |
| 4933412E  | 0.828491 | 0.190594 | 0.416856 |
| Tbc1d8b   | 0.314919 | 0.190637 | 0.416856 |
| Pknx1     | 0.229193 | 0.190678 | 0.416883 |
| Fam214a   | 0.2889   | 0.190752 | 0.416925 |
| Ly75      | 0.229866 | 0.19102  | 0.417328 |
| Nr1h2     | 0.147275 | 0.191074 | 0.417385 |
| Azin2     | 0.393941 | 0.191215 | 0.417511 |
| Abca2     | 0.273957 | 0.191281 | 0.41755  |
| Zfp932    | 0.327905 | 0.191369 | 0.417603 |
| Tgif2     | 0.586976 | 0.191409 | 0.417629 |
| Trpt1     | 0.460664 | 0.191459 | 0.417654 |
| Txn1      | 0.110985 | 0.191476 | 0.417654 |
| Letm2     | 0.227035 | 0.19156  | 0.417715 |
| G630016G  | 3.42235  | 0.192073 | 0.418605 |
| Gm37733   | 0.534126 | 0.192185 | 0.418645 |
| Sp2       | 0.229703 | 0.192242 | 0.418645 |
| Kdm5b     | 0.126101 | 0.192266 | 0.418645 |
| Mpv17l2   | 0.236909 | 0.192378 | 0.418829 |
| Lacc1     | 0.656899 | 0.192941 | 0.419767 |
| Pias4     | 0.205926 | 0.192949 | 0.419767 |
| Shb       | 0.306836 | 0.193145 | 0.420074 |
| Tmem260   | 0.216618 | 0.193231 | 0.420197 |
| Rspo2     | 1.681112 | 0.193391 | 0.420386 |
| Gm42648   | 1.087545 | 0.193646 | 0.420733 |
| Tfb1m     | 0.585548 | 0.193618 | 0.420733 |
| Ehbp1l1   | 0.157719 | 0.193606 | 0.420733 |
| Elmo3     | 0.871158 | 0.193876 | 0.421049 |
| Gm20632   | 0.646783 | 0.194025 | 0.421302 |
| Aifm2     | 0.344902 | 0.194049 | 0.421302 |
| Ankrd9    | 0.485731 | 0.194135 | 0.421363 |
| Ccdc17    | 0.706329 | 0.194203 | 0.421363 |
| Ezr       | 0.183979 | 0.194218 | 0.421363 |
| Fcgr3     | 1.868883 | 0.194537 | 0.421934 |
| Uchl5     | 0.188164 | 0.194514 | 0.421934 |
| Rictor    | 0.110108 | 0.194625 | 0.422064 |
| Galnt1    | 0.130824 | 0.194778 | 0.422334 |
| Tgfa      | 0.202658 | 0.194875 | 0.422483 |
| Rpl19-ps1 | 0.582646 | 0.195031 | 0.422637 |
| Fam168a   | 0.12759  | 0.195118 | 0.422764 |
| 1110002L  | 0.328557 | 0.195201 | 0.422885 |
| Lair1     | 1.042823 | 0.195486 | 0.423195 |

|          |          |          |          |
|----------|----------|----------|----------|
| Limk2    | 0.212129 | 0.195452 | 0.423182 |
| Gm44694  | 0.268351 | 0.19554  | 0.423251 |
| Samd5    | 0.357715 | 0.195822 | 0.423407 |
| Blmh     | 0.16441  | 0.196032 | 0.423581 |
| Gm42544  | 0.8361   | 0.196161 | 0.423737 |
| Eva1c    | 0.378465 | 0.196266 | 0.423852 |
| Arxes2   | 0.38523  | 0.196299 | 0.423852 |
| Cnot8    | 0.167407 | 0.196364 | 0.423931 |
| Ctss     | 0.767927 | 0.196453 | 0.424061 |
| Gm8444   | 2.214367 | 0.196609 | 0.424184 |
| Synj1    | 0.139508 | 0.196634 | 0.424184 |
| Sipa1l1  | 0.17701  | 0.197284 | 0.425427 |
| Acsf3    | 0.492927 | 0.19743  | 0.42568  |
| Nlrc3    | 0.703548 | 0.198122 | 0.426623 |
| Scarb1   | 0.103607 | 0.198101 | 0.426623 |
| Nmral1   | 0.692973 | 0.198152 | 0.426623 |
| Prkar2a  | 0.121635 | 0.198152 | 0.426623 |
| Als2cl   | 0.205163 | 0.198191 | 0.426644 |
| Cotl1    | 0.216486 | 0.198243 | 0.426696 |
| Cry1     | 0.229884 | 0.198385 | 0.426939 |
| Gm5136   | 1.369438 | 0.198648 | 0.427137 |
| Lsg1     | 0.228336 | 0.198744 | 0.427206 |
| Col9a3   | 0.735633 | 0.198766 | 0.427206 |
| Nfkb1    | 0.130064 | 0.198759 | 0.427206 |
| Myd88    | 0.265147 | 0.198859 | 0.427346 |
| Stambp   | 0.201242 | 0.198955 | 0.427491 |
| Gm43148  | 1.002204 | 0.199216 | 0.427836 |
| Cln5     | 0.205662 | 0.199192 | 0.427836 |
| Mrps36   | 0.165229 | 0.19923  | 0.427836 |
| Tmem51o  | 0.322501 | 0.1996   | 0.428385 |
| Bud31    | 0.144789 | 0.199658 | 0.428447 |
| Nhlrc3   | 0.286155 | 0.199822 | 0.428677 |
| Sema4g   | 0.87683  | 0.199982 | 0.428816 |
| Gm50013  | 1.144995 | 0.199978 | 0.428816 |
| Gm43088  | 0.56617  | 0.199969 | 0.428816 |
| Gm37105  | 0.547633 | 0.200064 | 0.428888 |
| Cmtm4    | 0.228961 | 0.2002   | 0.429118 |
| Helb     | 0.323276 | 0.200709 | 0.42997  |
| Ndufa2   | 0.071356 | 0.200712 | 0.42997  |
| Myl12a   | 0.065671 | 0.201159 | 0.43062  |
| Slc25a11 | 0.154071 | 0.201311 | 0.430884 |
| Tbkbp1   | 0.179015 | 0.201695 | 0.431543 |
| Hgsnat   | 0.194948 | 0.201813 | 0.431587 |
| Clk2     | 0.22274  | 0.202057 | 0.431986 |
| Gm20712  | 0.561285 | 0.202441 | 0.432437 |
| Eif2s3x  | 0.166266 | 0.20274  | 0.433013 |
| Minar2   | 0.267314 | 0.20281  | 0.433034 |

|          |          |          |          |
|----------|----------|----------|----------|
| Rnf6     | 0.133674 | 0.203251 | 0.433724 |
| Ppme1    | 0.150727 | 0.203276 | 0.433724 |
| lqce     | 0.340783 | 0.20332  | 0.433756 |
| Ttf1     | 0.192951 | 0.203448 | 0.433958 |
| Tsg101   | 0.12868  | 0.203472 | 0.433958 |
| Fam160b1 | 0.127764 | 0.203914 | 0.43447  |
| Abca5    | 0.206316 | 0.203927 | 0.43447  |
| Nat9     | 0.213235 | 0.203969 | 0.43447  |
| Uggt2    | 0.312625 | 0.203981 | 0.43447  |
| Cdkn2aip | 0.161631 | 0.204026 | 0.43447  |
| Gm49442  | 1.223062 | 0.204138 | 0.434512 |
| Trmt10b  | 0.323212 | 0.204224 | 0.43457  |
| Riok3    | 0.126956 | 0.204221 | 0.43457  |
| Gemin5   | 0.325812 | 0.204433 | 0.434892 |
| Gm15882  | 3.428136 | 0.204557 | 0.43497  |
| Pcdhb20  | 0.520376 | 0.204506 | 0.434924 |
| C030006K | 0.295701 | 0.204717 | 0.43525  |
| Sf3b1    | 0.076851 | 0.204891 | 0.435556 |
| Ttc41    | 1.21102  | 0.205027 | 0.435722 |
| Aff4     | 0.099008 | 0.20508  | 0.435772 |
| Rock2    | 0.076354 | 0.20596  | 0.437242 |
| Ap3m2    | 0.230044 | 0.205976 | 0.437242 |
| Bin1     | 0.202398 | 0.206208 | 0.43761  |
| Triobp   | 0.160275 | 0.206738 | 0.438196 |
| Gm10503  | 0.267195 | 0.207141 | 0.438792 |
| Banf1    | 0.106926 | 0.207146 | 0.438792 |
| Dnajc19  | 0.140887 | 0.207189 | 0.438821 |
| Dhps     | 0.174235 | 0.20748  | 0.439337 |
| Igsf9b   | 1.217975 | 0.207523 | 0.439337 |
| Napb     | 0.216939 | 0.207583 | 0.439337 |
| Acot7    | 0.347914 | 0.207766 | 0.439546 |
| Pacsin2  | 0.130574 | 0.208238 | 0.440358 |
| Gosr2    | 0.164247 | 0.208307 | 0.440443 |
| Prkcsh   | 0.187215 | 0.208544 | 0.440756 |
| Ddx56    | 0.262513 | 0.209409 | 0.442336 |
| Dok1     | 0.487413 | 0.209531 | 0.442344 |
| Slc35a4  | 0.183954 | 0.209562 | 0.442347 |
| Dennd2c  | 0.304355 | 0.210427 | 0.442894 |
| Cramp1   | 0.182045 | 0.210602 | 0.443049 |
| Psmc2    | 0.123008 | 0.211056 | 0.443725 |
| Zbtb42   | 0.32902  | 0.211075 | 0.443725 |
| Ndufb5   | 0.091056 | 0.211117 | 0.443725 |
| Abhd12   | 0.202884 | 0.211241 | 0.443802 |
| Caprin2  | 0.641301 | 0.211289 | 0.443802 |
| Tnnt1    | 0.622091 | 0.211277 | 0.443802 |
| Dph6     | 0.212805 | 0.211551 | 0.444149 |
| Pheta1   | 0.365627 | 0.21181  | 0.44448  |

|           |          |          |          |
|-----------|----------|----------|----------|
| Psmc1     | 0.120763 | 0.21182  | 0.44448  |
| Mtx2      | 0.182038 | 0.21185  | 0.444481 |
| Gm10699   | 0.653573 | 0.212005 | 0.444665 |
| D330023K  | 0.263003 | 0.212027 | 0.444665 |
| Setd4     | 0.552193 | 0.212115 | 0.444674 |
| Blm       | 0.399281 | 0.21212  | 0.444674 |
| Rab1b     | 0.126871 | 0.212234 | 0.444851 |
| Cdc42ep1  | 0.15924  | 0.212497 | 0.445224 |
| Ube2d2a   | 0.094412 | 0.212538 | 0.445224 |
| Mzt1      | 0.174995 | 0.212599 | 0.445224 |
| Srcin1    | 0.80308  | 0.212621 | 0.445224 |
| Suox      | 0.386323 | 0.21262  | 0.445224 |
| D17H6S53  | 0.322368 | 0.212703 | 0.445334 |
| Smo       | 0.23038  | 0.212806 | 0.445488 |
| Dhx32     | 0.227688 | 0.212992 | 0.445814 |
| Cebpzos   | 0.149246 | 0.213132 | 0.445984 |
| Nemp1     | 0.294775 | 0.213433 | 0.446364 |
| Slc35a1   | 0.16864  | 0.213508 | 0.446458 |
| Carnmt1   | 0.211151 | 0.21355  | 0.446485 |
| Plekha7   | 0.512242 | 0.213588 | 0.446501 |
| Rps26-ps1 | 0.384056 | 0.213756 | 0.44679  |
| Pdp1      | 0.26489  | 0.213926 | 0.446958 |
| Gm45551   | 1.567736 | 0.214319 | 0.447593 |
| Rfc4      | 0.347809 | 0.214569 | 0.447989 |
| Gm14703   | 1.54292  | 0.214714 | 0.448229 |
| Timmdc1   | 0.386016 | 0.214989 | 0.448678 |
| Pde1b     | 0.461857 | 0.215026 | 0.448692 |
| Chfr      | 0.191449 | 0.215103 | 0.448741 |
| Pla2g7    | 0.286049 | 0.215139 | 0.448741 |
| Numa1     | 0.108148 | 0.215128 | 0.448741 |
| Dnajc14   | 0.161483 | 0.215205 | 0.448816 |
| E430018J2 | 0.534531 | 0.21534  | 0.449034 |
| Zfp182    | 0.30931  | 0.215523 | 0.449355 |
| Slc30a5   | 0.19828  | 0.215761 | 0.449538 |
| Cox7a2    | 0.063545 | 0.215841 | 0.449579 |
| Hap1      | 0.466217 | 0.216021 | 0.449829 |
| Tmem168   | 0.18649  | 0.216102 | 0.449929 |
| Topbp1    | 0.214557 | 0.216129 | 0.449929 |
| Insig2    | 0.156938 | 0.21619  | 0.449994 |
| 0610012G  | 0.112901 | 0.216557 | 0.450632 |
| Amacr     | 0.317565 | 0.21682  | 0.451117 |
| Eny2      | 0.113102 | 0.217145 | 0.451542 |
| Pdzd11    | 0.176799 | 0.217981 | 0.452714 |
| Smim15    | 0.130612 | 0.218211 | 0.452878 |
| Dmac2     | 0.223868 | 0.218892 | 0.453976 |
| Snx20     | 0.993457 | 0.218982 | 0.454099 |
| Emc2      | 0.127523 | 0.219172 | 0.454304 |

|          |          |          |          |
|----------|----------|----------|----------|
| Adra2a   | 1.035621 | 0.219236 | 0.454312 |
| Gm15687  | 2.017084 | 0.219469 | 0.454502 |
| Zfp286   | 0.53625  | 0.219389 | 0.454502 |
| Slc17a1  | 0.488185 | 0.21951  | 0.454502 |
| Iqsec2   | 0.312678 | 0.219624 | 0.454664 |
| Slc38a10 | 0.179844 | 0.219649 | 0.454664 |
| Fkbp3    | 0.096688 | 0.219694 | 0.454694 |
| Gm20498  | 0.873121 | 0.219816 | 0.454885 |
| Slc66a1  | 0.419283 | 0.219868 | 0.454929 |
| Pomk     | 0.423978 | 0.220114 | 0.455206 |
| Aplf     | 0.52441  | 0.220156 | 0.455206 |
| Armh3    | 0.336047 | 0.220227 | 0.455231 |
| Gm15634  | 1.94495  | 0.220755 | 0.456009 |
| Cnp      | 0.251916 | 0.22071  | 0.456009 |
| Rras2    | 0.186224 | 0.220727 | 0.456009 |
| Gm43692  | 1.009394 | 0.220816 | 0.456071 |
| Zbtb43   | 0.220361 | 0.220869 | 0.456118 |
| Mrpl12   | 0.139499 | 0.220959 | 0.456241 |
| 4632404H | 0.426868 | 0.221011 | 0.456285 |
| A930006L | 2.008538 | 0.221124 | 0.456454 |
| Gpr135   | 0.682705 | 0.221156 | 0.456458 |
| Chd5     | 0.518034 | 0.221368 | 0.456769 |
| Rgcc     | 0.09522  | 0.221491 | 0.456834 |
| Kif3a    | 0.204317 | 0.221603 | 0.45694  |
| Tm9sf3   | 0.07651  | 0.221733 | 0.457019 |
| Snrpert  | 0.679205 | 0.221858 | 0.457151 |
| Tube1    | 0.528666 | 0.221916 | 0.457169 |
| Atp5l    | 0.093832 | 0.221928 | 0.457169 |
| Spata5l1 | 0.356483 | 0.221982 | 0.457218 |
| Zfp235   | 0.365071 | 0.222125 | 0.457397 |
| Ovgp1    | 1.031999 | 0.222497 | 0.458022 |
| Unc79    | 2.408426 | 0.222556 | 0.458022 |
| Fhod1    | 0.235372 | 0.222612 | 0.458074 |
| Sumo3    | 0.109563 | 0.222689 | 0.45808  |
| Atp6v1c1 | 0.172042 | 0.223165 | 0.458896 |
| Stard3nl | 0.142046 | 0.223457 | 0.459238 |
| Galnt4   | 0.26762  | 0.223544 | 0.459238 |
| Zranb3   | 0.608475 | 0.223729 | 0.459425 |
| Bicc1    | 0.24763  | 0.223827 | 0.459494 |
| Uri1     | 0.131081 | 0.223866 | 0.459494 |
| Dbt      | 0.322426 | 0.223915 | 0.459494 |
| Foxo3    | 0.173894 | 0.22392  | 0.459494 |
| Igf1r    | 0.062947 | 0.223968 | 0.459494 |
| Fbxo17   | 0.577277 | 0.224022 | 0.459494 |
| Ntmt1    | 0.236232 | 0.22417  | 0.459637 |
| Zfp703   | 0.181558 | 0.224269 | 0.459704 |
| Malsu1   | 0.162637 | 0.224295 | 0.459704 |

|           |          |          |          |
|-----------|----------|----------|----------|
| Cpne9     | 1.792305 | 0.224419 | 0.459805 |
| Smapi1    | 0.089473 | 0.224436 | 0.459805 |
| Gm49797   | 0.281397 | 0.224552 | 0.459854 |
| Gm44091   | 2.141624 | 0.224751 | 0.460011 |
| Gm43343   | 0.190342 | 0.224676 | 0.45992  |
| Mroh1     | 0.270576 | 0.224827 | 0.460025 |
| Zxdb      | 0.229349 | 0.224851 | 0.460025 |
| Zfp617    | 0.237181 | 0.224881 | 0.460025 |
| Btbd1     | 0.119133 | 0.225054 | 0.460256 |
| Gm31024   | 1.027357 | 0.225542 | 0.460874 |
| Rps7-ps3  | 0.551211 | 0.225898 | 0.461475 |
| Zfp975    | 0.549858 | 0.226295 | 0.462198 |
| Usp50     | 0.722637 | 0.226551 | 0.462492 |
| Al837181  | 0.165957 | 0.22749  | 0.463452 |
| Dhrs7b    | 0.239118 | 0.227516 | 0.463452 |
| Ap2m1     | 0.090271 | 0.227638 | 0.463594 |
| Dazap1    | 0.13906  | 0.227737 | 0.463712 |
| Sdhaf1    | 0.142036 | 0.22786  | 0.463899 |
| Elp1      | 0.251558 | 0.227962 | 0.464025 |
| BC004004  | 0.146402 | 0.227999 | 0.464025 |
| Snx2      | 0.1389   | 0.228076 | 0.464088 |
| Atn1      | 0.146055 | 0.228235 | 0.464159 |
| Fam187b   | 0.55495  | 0.228385 | 0.464401 |
| C1d       | 0.128385 | 0.228862 | 0.46518  |
| Acot2     | 0.230834 | 0.228923 | 0.465199 |
| Tanc2     | 0.275407 | 0.228933 | 0.465199 |
| Gm38260   | 1.970495 | 0.229226 | 0.465478 |
| Tshz3     | 0.260201 | 0.229574 | 0.465995 |
| Washc1    | 0.231244 | 0.229706 | 0.466136 |
| 8430429Kl | 0.336087 | 0.229956 | 0.466518 |
| Tpm3      | 0.091983 | 0.230291 | 0.466881 |
| Prok1     | 2.71944  | 0.230424 | 0.467087 |
| Clptm1    | 0.133755 | 0.230489 | 0.467132 |
| C330013E  | 0.560125 | 0.230535 | 0.467132 |
| lqcd      | 0.602992 | 0.23054  | 0.467132 |
| Tmem245   | 0.09761  | 0.230777 | 0.467486 |
| Mydgf     | 0.127947 | 0.230969 | 0.467812 |
| Wdr77     | 0.272288 | 0.231039 | 0.467821 |
| Ammecri1  | 0.202788 | 0.231398 | 0.46815  |
| Gm45399   | 1.217686 | 0.23175  | 0.468444 |
| Dennd4c   | 0.144132 | 0.23173  | 0.468444 |
| Gm43062   | 0.86608  | 0.231744 | 0.468444 |
| Nkrf      | 0.433744 | 0.232313 | 0.469138 |
| Vti1b     | 0.116213 | 0.232303 | 0.469138 |
| Smoc1     | 2.080411 | 0.232501 | 0.46923  |
| Zfp583    | 0.715747 | 0.232478 | 0.46923  |
| Srrd      | 0.286396 | 0.232515 | 0.46923  |

|           |          |          |          |
|-----------|----------|----------|----------|
| Mxd1      | 0.241957 | 0.232554 | 0.469246 |
| Zfp316    | 0.333427 | 0.232796 | 0.46953  |
| Poc1b     | 0.236923 | 0.232817 | 0.46953  |
| Plod2     | 0.224108 | 0.23282  | 0.46953  |
| Mpv17     | 0.175749 | 0.232887 | 0.4696   |
| Ryr2      | 1.210517 | 0.23314  | 0.469857 |
| Larp1b    | 0.187976 | 0.23321  | 0.469901 |
| Slc26a2   | 0.191317 | 0.2335   | 0.470331 |
| Ccdc51    | 0.339216 | 0.233769 | 0.470745 |
| Tnrc6a    | 0.102687 | 0.234098 | 0.47105  |
| Ahcy      | 0.802466 | 0.234361 | 0.471319 |
| Rps15a-ps | 0.435699 | 0.2344   | 0.471319 |
| Stim1     | 0.14297  | 0.235022 | 0.472297 |
| Ehmt2     | 0.158602 | 0.235044 | 0.472297 |
| Kif21b    | 0.223377 | 0.235132 | 0.472347 |
| Zfta      | 0.262143 | 0.235252 | 0.472523 |
| B930036N  | 0.664363 | 0.235399 | 0.472566 |
| Gorab     | 0.256168 | 0.235397 | 0.472566 |
| Rgs11     | 0.747344 | 0.235502 | 0.472646 |
| Mtarc2    | 0.087824 | 0.235483 | 0.472646 |
| Gm37349   | 0.664117 | 0.236272 | 0.473873 |
| Pdyn      | 1.345878 | 0.236323 | 0.473912 |
| Tmem147   | 0.871772 | 0.236432 | 0.47394  |
| Gm11510   | 0.66055  | 0.236598 | 0.474145 |
| Rnf144a   | 0.21441  | 0.236637 | 0.474161 |
| Nmnat3    | 0.550026 | 0.236679 | 0.474182 |
| Zcchc14   | 0.115305 | 0.236955 | 0.474634 |
| Rabgap1l  | 0.173454 | 0.23707  | 0.474635 |
| 3110080O  | 0.619442 | 0.237227 | 0.474835 |
| Zdhhc20   | 0.114673 | 0.237381 | 0.475011 |
| Card6     | 0.374136 | 0.237473 | 0.475011 |
| Dtx3      | 0.122552 | 0.237474 | 0.475011 |
| Ap2s1     | 0.111332 | 0.237714 | 0.475301 |
| Fam207a   | 0.212389 | 0.238081 | 0.475909 |
| Mrpl57    | 0.153006 | 0.238781 | 0.477116 |
| Tmem131l  | 0.401205 | 0.238847 | 0.477128 |
| Gm20544   | 1.283658 | 0.23919  | 0.477591 |
| Nkiras2   | 0.235755 | 0.239481 | 0.477877 |
| Sod3      | 0.192095 | 0.239621 | 0.477901 |
| Cep95     | 0.422306 | 0.240149 | 0.478509 |
| Mkrn2     | 0.19071  | 0.240376 | 0.478642 |
| Mfsd12    | 0.39291  | 0.240529 | 0.478883 |
| Vegfa     | 0.330397 | 0.240686 | 0.478989 |
| Snx6      | 0.106706 | 0.240742 | 0.478989 |
| Edil3     | 0.628859 | 0.24102  | 0.479414 |
| Ufsp2     | 0.169577 | 0.241216 | 0.47974  |
| Slc14a1   | 0.900913 | 0.241528 | 0.480105 |

|            |          |          |          |
|------------|----------|----------|----------|
| Gtf2e2     | 0.168542 | 0.24165  | 0.480284 |
| Syt4       | 0.632307 | 0.241795 | 0.480317 |
| Cyp4f17    | 0.355436 | 0.241852 | 0.480367 |
| Gm9768     | 1.204158 | 0.242268 | 0.480947 |
| Xkr8       | 0.390651 | 0.242304 | 0.480947 |
| Zyx        | 0.172221 | 0.242501 | 0.48117  |
| Rpl36a-ps2 | 0.345844 | 0.242565 | 0.481209 |
| Nbn        | 0.217978 | 0.242767 | 0.481458 |
| Kif13b     | 0.146067 | 0.242892 | 0.481538 |
| Alkbh2     | 0.281119 | 0.24338  | 0.482379 |
| Spi1       | 1.192765 | 0.243516 | 0.482584 |
| Alg10b     | 0.15985  | 0.243774 | 0.482883 |
| Cenpa      | 0.384106 | 0.243796 | 0.482883 |
| 2610005LC  | 0.209904 | 0.244121 | 0.483462 |
| Siah1a     | 0.129273 | 0.244395 | 0.483837 |
| Bik        | 0.531842 | 0.244474 | 0.483837 |
| 9930120I1  | 0.611492 | 0.244536 | 0.483837 |
| Dynlt1f    | 0.262142 | 0.24452  | 0.483837 |
| Baiap2l1   | 0.885058 | 0.244954 | 0.484362 |
| Aldh6a1    | 0.188904 | 0.244963 | 0.484362 |
| 2700062CI  | 0.277361 | 0.245027 | 0.484424 |
| ltpkc      | 0.407667 | 0.245086 | 0.484476 |
| A830009LC  | 1.070082 | 0.245514 | 0.485131 |
| Cacnb3     | 0.481785 | 0.245816 | 0.485472 |
| Rdh11      | 0.240981 | 0.246077 | 0.485709 |
| Vti1a      | 0.183603 | 0.246064 | 0.485709 |
| Carf       | 0.255682 | 0.246158 | 0.485709 |
| Gm37677    | 0.411314 | 0.246297 | 0.485837 |
| Tecpr2     | 0.260619 | 0.246386 | 0.485845 |
| Gm37019    | 1.320873 | 0.246519 | 0.485932 |
| Adprm      | 0.245572 | 0.246607 | 0.485982 |
| Dynlrb2    | 1.361555 | 0.246809 | 0.486214 |
| Tbc1d9b    | 0.146055 | 0.246761 | 0.486183 |
| Slc6a8     | 0.203965 | 0.247527 | 0.487308 |
| Boc        | 0.344632 | 0.248138 | 0.488189 |
| Trim6      | 0.421827 | 0.248287 | 0.488379 |
| Eif5       | 0.070446 | 0.248299 | 0.488379 |
| Gm4430-1   | 0.905557 | 0.248558 | 0.488822 |
| Rgs10      | 0.421337 | 0.249013 | 0.489525 |
| 1700017BI  | 0.317321 | 0.249385 | 0.489998 |
| Gm38376    | 0.56301  | 0.24974  | 0.490439 |
| Gaa        | 0.181577 | 0.249739 | 0.490439 |
| Car8       | 0.82649  | 0.249907 | 0.490639 |
| 9430038IO  | 0.206013 | 0.250646 | 0.491678 |
| Dnajb12    | 0.174679 | 0.250666 | 0.491678 |
| Arpc5      | 0.088005 | 0.25071  | 0.491699 |
| Rpap3      | 0.199815 | 0.250915 | 0.492026 |



|           |          |          |          |
|-----------|----------|----------|----------|
| Nop58     | 0.152646 | 0.250975 | 0.492026 |
| Zfp184    | 0.533385 | 0.25109  | 0.492186 |
| Celf6     | 1.187418 | 0.251224 | 0.492384 |
| 8430419Kl | 3.675435 | 0.251348 | 0.492499 |
| Sgcg      | 0.497312 | 0.251344 | 0.492499 |
| Gm42782   | 1.077417 | 0.251528 | 0.492658 |
| Kat7      | 0.151425 | 0.251748 | 0.49283  |
| Zfp827    | 0.419128 | 0.251812 | 0.492892 |
| Tap2      | 0.121813 | 0.252143 | 0.493346 |
| Oxld1     | 0.354634 | 0.252247 | 0.493395 |
| Adprh     | 0.131719 | 0.252408 | 0.493413 |
| Ngdn      | 0.14893  | 0.252561 | 0.493584 |
| Gm18564   | 4.412035 | 0.252693 | 0.493652 |
| Zeb1      | 0.087645 | 0.252692 | 0.493652 |
| Cyb5d2    | 0.244531 | 0.252754 | 0.493703 |
| Sac3d1    | 0.238397 | 0.253058 | 0.494168 |
| Cacna1a   | 0.215006 | 0.25366  | 0.495021 |
| Ankrd39   | 0.237845 | 0.253727 | 0.495087 |
| Ifi30     | 0.210947 | 0.254127 | 0.495667 |
| Optn      | 0.189464 | 0.254259 | 0.495801 |
| Ndufb11   | 0.065332 | 0.254991 | 0.496622 |
| Sncaip    | 0.381459 | 0.255037 | 0.496622 |
| Tcf3      | 0.144612 | 0.255483 | 0.497024 |
| Nt5dc3    | 0.304028 | 0.25564  | 0.497221 |
| Gm37706   | 0.308976 | 0.255732 | 0.497313 |
| Znhit1    | 0.133629 | 0.25585  | 0.497479 |
| 4930539JC | 0.664069 | 0.255926 | 0.497562 |
| Gm28578   | 0.620988 | 0.256337 | 0.49823  |
| Pld2      | 0.241723 | 0.256467 | 0.498354 |
| Gm4065    | 0.965229 | 0.256525 | 0.498403 |
| Cd300c2   | 1.710335 | 0.256628 | 0.498473 |
| Plat      | 0.074802 | 0.256837 | 0.49875  |
| Fbxo46    | 0.301095 | 0.257028 | 0.498927 |
| Rnf38     | 0.140858 | 0.257591 | 0.49989  |
| Gm15965   | 1.379122 | 0.257733 | 0.499968 |
| Gpt       | 0.656287 | 0.257768 | 0.499968 |
| Gm11772   | 0.448185 | 0.257893 | 0.499968 |
| Fbxo42    | 0.217143 | 0.258077 | 0.500108 |
| Stc1      | 0.311597 | 0.25825  | 0.500197 |
| Mcts1     | 0.14621  | 0.258238 | 0.500197 |
| Scyl1     | 0.162373 | 0.258246 | 0.500197 |
| Phactr2   | 0.101502 | 0.25831  | 0.500219 |
| Eno3      | 0.549346 | 0.258597 | 0.500675 |
| Gm8797    | 0.379572 | 0.258882 | 0.501097 |
| Gm43788   | 0.272819 | 0.259007 | 0.501203 |
| Cacfd1    | 0.188713 | 0.259055 | 0.501203 |
| H1f3      | 0.659938 | 0.259071 | 0.501203 |

|           |          |          |          |
|-----------|----------|----------|----------|
| Ddx19b    | 0.334087 | 0.259321 | 0.50162  |
| Setd1a    | 0.204068 | 0.259469 | 0.501779 |
| Rragc     | 0.134336 | 0.259658 | 0.501836 |
| Thrap3    | 0.089943 | 0.260254 | 0.502767 |
| 4930522L1 | 0.290559 | 0.260567 | 0.503123 |
| Gm42699   | 0.481171 | 0.260953 | 0.503673 |
| Ostc      | 0.107637 | 0.261105 | 0.503766 |
| Mocos     | 0.38832  | 0.261136 | 0.503766 |
| Gm2296    | 0.711646 | 0.261448 | 0.504108 |
| Naa80     | 0.176211 | 0.261413 | 0.504105 |
| Tbc1d20   | 0.121583 | 0.26151  | 0.504163 |
| Cacna1h   | 0.331076 | 0.261571 | 0.504163 |
| Zfp319    | 0.170425 | 0.261596 | 0.504163 |
| MIlt3     | 0.12076  | 0.261629 | 0.504163 |
| Haghl     | 0.214885 | 0.261663 | 0.504163 |
| Gm37298   | 0.365724 | 0.261712 | 0.504163 |
| Sema6a    | 0.096141 | 0.261864 | 0.504391 |
| Sel1l     | 0.103947 | 0.262001 | 0.504525 |
| Begain    | 0.378344 | 0.262521 | 0.505087 |
| Gm48529   | 0.705494 | 0.26269  | 0.505266 |
| Rab26     | 0.62324  | 0.26279  | 0.505393 |
| Rad23b    | 0.112244 | 0.263175 | 0.50594  |
| Disp2     | 1.552952 | 0.263415 | 0.50614  |
| Nme7      | 0.378261 | 0.263612 | 0.506455 |
| Ints3     | 0.205525 | 0.263838 | 0.506758 |
| Id4       | 0.508932 | 0.264352 | 0.507225 |
| Mocs1     | 0.630442 | 0.264532 | 0.507324 |
| Zfp961    | 0.285592 | 0.264525 | 0.507324 |
| Sugt1     | 0.090922 | 0.26456  | 0.507324 |
| Aph1b     | 0.267368 | 0.265096 | 0.508066 |
| Gm4013    | 0.423937 | 0.265589 | 0.508816 |
| Trmt9b    | 0.379458 | 0.265884 | 0.509186 |
| Wdfy2     | 0.254832 | 0.266191 | 0.509449 |
| 4933406Pi | 0.844365 | 0.26627  | 0.509533 |
| Poli      | 0.459457 | 0.266404 | 0.509681 |
| Fech      | 0.190059 | 0.266527 | 0.509681 |
| 4930426I2 | 0.473711 | 0.266551 | 0.509681 |
| Add1      | 0.088708 | 0.266721 | 0.509942 |
| Ankib1    | 0.154366 | 0.26679  | 0.510008 |
| Rpl7l1    | 0.12269  | 0.266909 | 0.510105 |
| Nkap      | 0.126947 | 0.267041 | 0.510241 |
| Zfp628    | 0.3191   | 0.267095 | 0.510264 |
| Polr3gl   | 0.139649 | 0.267133 | 0.510273 |
| 1700081N  | 1.012653 | 0.267425 | 0.510504 |
| Xrn2      | 0.103311 | 0.267405 | 0.510504 |
| Pcdhgc4   | 0.39393  | 0.267517 | 0.510615 |
| Apaf1     | 0.234314 | 0.267558 | 0.510627 |

|           |          |          |          |
|-----------|----------|----------|----------|
| Afg3l1    | 0.192289 | 0.267718 | 0.510804 |
| Rab42     | 0.647518 | 0.267806 | 0.510906 |
| Sppl2a    | 0.080136 | 0.268019 | 0.511247 |
| Dcaf7     | 0.125226 | 0.268061 | 0.511262 |
| 9430065F: | 1.345602 | 0.268266 | 0.511425 |
| Ift140    | 0.378987 | 0.268283 | 0.511425 |
| Gm50394   | 1.394339 | 0.26843  | 0.511574 |
| Phb2      | 0.109085 | 0.26868  | 0.511856 |
| Got2      | 0.12898  | 0.268761 | 0.511945 |
| Tex30     | 0.250565 | 0.268981 | 0.512169 |
| Tm2d1     | 0.124902 | 0.269055 | 0.512245 |
| Mrps28    | 0.180876 | 0.269534 | 0.512958 |
| Ganc      | 0.201944 | 0.269676 | 0.512958 |
| Tpp1      | 0.106109 | 0.269967 | 0.513098 |
| Tmem35b   | 0.325651 | 0.270074 | 0.51314  |
| Nfil3     | 0.485748 | 0.270221 | 0.513354 |
| Tbpl1     | 0.161648 | 0.270414 | 0.513657 |
| Ctps2     | 0.235073 | 0.270459 | 0.513677 |
| Axin1     | 0.202034 | 0.270637 | 0.513884 |
| Nsmce2    | 0.16837  | 0.271726 | 0.51543  |
| Akt3      | 0.124238 | 0.272334 | 0.516167 |
| Nol12     | 0.229147 | 0.272458 | 0.516167 |
| Fam111a   | 0.278931 | 0.27246  | 0.516167 |
| Etf1      | 0.125663 | 0.272496 | 0.51617  |
| Zfp389    | 1.889162 | 0.272638 | 0.516297 |
| Snapc2    | 0.228421 | 0.272666 | 0.516297 |
| Hsd17b12  | 0.150364 | 0.272948 | 0.516766 |
| Gstt3     | 0.321684 | 0.273429 | 0.517422 |
| Tmem259   | 0.125108 | 0.273433 | 0.517422 |
| Ogfod2    | 0.294896 | 0.27367  | 0.517805 |
| 5830444F: | 1.551802 | 0.273841 | 0.517931 |
| Ms4a6c    | 1.12153  | 0.273806 | 0.517931 |
| Pla2g6    | 0.330833 | 0.273876 | 0.517932 |
| Cox7c-ps1 | 0.578262 | 0.27441  | 0.51868  |
| Agap2     | 0.509695 | 0.274558 | 0.518681 |
| Eri1      | 0.279483 | 0.274564 | 0.518681 |
| Trim59    | 0.70898  | 0.274584 | 0.518681 |
| Camsap2   | 0.113816 | 0.274632 | 0.518701 |
| Nod2      | 0.402873 | 0.275079 | 0.519186 |
| Clstn3    | 0.578839 | 0.275356 | 0.519398 |
| D430013B  | 0.364464 | 0.275356 | 0.519398 |
| Igbbp1    | 0.122496 | 0.27539  | 0.519398 |
| Tiprl     | 0.122506 | 0.275467 | 0.519398 |
| Cep72     | 0.546949 | 0.27552  | 0.519398 |
| Map3k10   | 0.202509 | 0.275542 | 0.519398 |
| Bet1l     | 0.149526 | 0.275691 | 0.519593 |
| Gm29257   | 0.896271 | 0.275783 | 0.519635 |

|           |          |          |          |
|-----------|----------|----------|----------|
| Mrpl53    | 0.748688 | 0.27608  | 0.519998 |
| Gm20274   | 0.436387 | 0.276141 | 0.520016 |
| Ap5s1     | 0.384074 | 0.276193 | 0.520016 |
| A730061H  | 1.230213 | 0.276946 | 0.520975 |
| Lactbl1   | 2.324501 | 0.277094 | 0.521187 |
| Cep170    | 0.157138 | 0.277202 | 0.521324 |
| Gm34294   | 1.24292  | 0.277278 | 0.521402 |
| Gm37331   | 2.291886 | 0.277402 | 0.521505 |
| Commd7    | 0.144342 | 0.277451 | 0.521532 |
| Nostrin   | 0.074733 | 0.277668 | 0.521676 |
| Aox1      | 0.367355 | 0.277715 | 0.521699 |
| Gpatch1   | 0.214586 | 0.277871 | 0.521796 |
| Fis1      | 0.073659 | 0.277909 | 0.521803 |
| Gm43794   | 0.255536 | 0.278221 | 0.522291 |
| Gm8451    | 0.869863 | 0.278653 | 0.522937 |
| Uros      | 0.438625 | 0.278716 | 0.522989 |
| Tfam      | 0.160549 | 0.278778 | 0.523031 |
| Ndufaf2   | 0.150183 | 0.27943  | 0.524002 |
| Zfp341    | 0.496403 | 0.279553 | 0.524101 |
| Gm44510   | 0.471054 | 0.279824 | 0.524543 |
| Prdm9     | 0.347356 | 0.279961 | 0.524735 |
| Gns       | 0.136635 | 0.28046  | 0.525459 |
| Sf3b2     | 0.068485 | 0.280488 | 0.525459 |
| Zfp383    | 0.296889 | 0.280537 | 0.525485 |
| Ptrh1     | 0.992101 | 0.280719 | 0.525676 |
| Gm26670   | 1.080759 | 0.28078  | 0.525676 |
| Snx30     | 0.395546 | 0.281526 | 0.526744 |
| Gnpda1    | 0.368826 | 0.281644 | 0.526899 |
| Ptprcap   | 1.238151 | 0.281886 | 0.527154 |
| Gm49041   | 0.525603 | 0.281886 | 0.527154 |
| Ldhd      | 0.508162 | 0.281958 | 0.527223 |
| Secisbp2l | 0.100838 | 0.282131 | 0.527368 |
| 9430064l2 | 1.000664 | 0.282247 | 0.527368 |
| Gm42555   | 0.945322 | 0.282245 | 0.527368 |
| Tlk1      | 0.10298  | 0.282224 | 0.527368 |
| Ano10     | 0.202749 | 0.282293 | 0.527388 |
| Gm44237   | 0.614452 | 0.282377 | 0.527413 |
| Crb3      | 1.181709 | 0.282918 | 0.528096 |
| Ttbk1     | 1.312855 | 0.283145 | 0.528386 |
| Ccdc62    | 0.44402  | 0.283381 | 0.528761 |
| Gm42515   | 0.350538 | 0.283695 | 0.529214 |
| Mtfr1l    | 0.119287 | 0.283841 | 0.529421 |
| Enc1      | 0.104262 | 0.284282 | 0.529981 |
| Maob      | 0.175627 | 0.284478 | 0.530165 |
| Tent5a    | 0.47665  | 0.284502 | 0.530165 |
| Micall2   | 0.382676 | 0.284523 | 0.530165 |
| Cacna2d3  | 0.841857 | 0.284569 | 0.530185 |

|           |          |          |          |
|-----------|----------|----------|----------|
| Manba     | 0.239235 | 0.284754 | 0.530397 |
| Tkfc      | 0.491483 | 0.284886 | 0.530508 |
| 1810059C  | 1.658185 | 0.285717 | 0.531652 |
| Snhg4     | 0.297769 | 0.285747 | 0.531652 |
| Plekhn1   | 0.162745 | 0.28592  | 0.531775 |
| Arfgef3   | 0.529187 | 0.286172 | 0.532112 |
| Mkln1os   | 0.693514 | 0.286642 | 0.532787 |
| Oard1     | 0.132177 | 0.286889 | 0.533115 |
| Klf16     | 0.224448 | 0.28696  | 0.533173 |
| Adrb2     | 0.22226  | 0.287118 | 0.533267 |
| Slc18a2   | 0.80145  | 0.28725  | 0.533322 |
| Zcchc9-ps | 2.857492 | 0.287754 | 0.534059 |
| Samd10    | 0.300123 | 0.287957 | 0.53417  |
| Pepd      | 0.234054 | 0.288077 | 0.534204 |
| Syne3     | 0.278208 | 0.288137 | 0.534204 |
| Gm26881   | 0.366347 | 0.288189 | 0.534204 |
| Dnase1l1  | 0.163554 | 0.28831  | 0.534233 |
| Agpat2    | 0.253282 | 0.288474 | 0.534233 |
| Rtn4      | 0.066636 | 0.28849  | 0.534233 |
| Cryaa     | 0.365437 | 0.288526 | 0.534234 |
| Hmgn2     | 0.133373 | 0.288696 | 0.534416 |
| Xkrx      | 1.479876 | 0.288818 | 0.53457  |
| Mrpl14    | 0.099412 | 0.28897  | 0.53457  |
| Pnpo      | 0.345005 | 0.289068 | 0.534634 |
| Tgds      | 0.301587 | 0.289099 | 0.534634 |
| Dnajc15   | 0.16592  | 0.289296 | 0.534766 |
| 9530018F  | 0.412191 | 0.289529 | 0.534966 |
| C1qc      | 0.776423 | 0.289656 | 0.535014 |
| Micall1   | 0.18063  | 0.289662 | 0.535014 |
| Fmnl1     | 1.167955 | 0.289959 | 0.535364 |
| Gmeb2     | 0.189442 | 0.290032 | 0.535433 |
| Gm42943   | 1.026518 | 0.290266 | 0.5356   |
| Zfand4    | 0.593299 | 0.290585 | 0.535879 |
| Rnf126    | 0.185118 | 0.290599 | 0.535879 |
| Ngfr      | 0.870041 | 0.290727 | 0.535879 |
| Psmb7     | 0.092217 | 0.29069  | 0.535879 |
| Wdr66     | 0.715279 | 0.290716 | 0.535879 |
| Zkscan8   | 0.190469 | 0.290739 | 0.535879 |
| Cenpm     | 1.091854 | 0.290889 | 0.536029 |
| Drc3      | 0.538273 | 0.290963 | 0.536029 |
| Tpst1     | 0.155653 | 0.291529 | 0.536781 |
| Dysf      | 0.146602 | 0.291561 | 0.536781 |
| Ctdsp1    | 0.103314 | 0.291622 | 0.536781 |
| Gnai1     | 0.292442 | 0.291865 | 0.537094 |
| Mgat4b    | 0.142366 | 0.292206 | 0.537435 |
| Cyb5a     | 0.081767 | 0.292355 | 0.537435 |
| Ppif      | 0.40122  | 0.292479 | 0.537498 |

|           |          |          |          |
|-----------|----------|----------|----------|
| Sephs2    | 0.224545 | 0.292543 | 0.537498 |
| Ngrn      | 0.145084 | 0.292551 | 0.537498 |
| Ppcs      | 0.270163 | 0.292608 | 0.537537 |
| Polr1a    | 0.253928 | 0.293286 | 0.538518 |
| Mrgbp     | 0.165262 | 0.29382  | 0.5393   |
| Cbr4      | 0.291714 | 0.294023 | 0.539474 |
| Cd52      | 0.736423 | 0.294138 | 0.539588 |
| C030037D  | 0.304914 | 0.294215 | 0.539628 |
| Gm38037   | 1.359455 | 0.294473 | 0.539852 |
| Slc27a1   | 0.226912 | 0.294438 | 0.539852 |
| Dus4l     | 0.361156 | 0.294505 | 0.539852 |
| Fbl       | 0.171976 | 0.294599 | 0.539852 |
| Rab37     | 0.697051 | 0.294754 | 0.539955 |
| Pde6c     | 0.393138 | 0.294845 | 0.540044 |
| Tmem79    | 0.751636 | 0.295132 | 0.540326 |
| Smim7     | 0.115935 | 0.295137 | 0.540326 |
| Rfx2      | 0.473678 | 0.295183 | 0.540344 |
| Bahd1     | 0.236019 | 0.295468 | 0.5408   |
| Rfx5      | 0.273304 | 0.29554  | 0.540867 |
| Fgfbp3    | 0.239482 | 0.295589 | 0.54089  |
| 1700030KI | 0.38614  | 0.295697 | 0.540955 |
| Gm9803    | 0.640657 | 0.295912 | 0.541107 |
| Fam124a   | 0.902369 | 0.295945 | 0.541107 |
| Kcnk6     | 0.356877 | 0.296023 | 0.541155 |
| Magee1    | 0.24428  | 0.296788 | 0.541958 |
| Mtmr9     | 0.220816 | 0.296786 | 0.541958 |
| Zfp598    | 0.149693 | 0.296991 | 0.542262 |
| Zfp944    | 0.293871 | 0.297181 | 0.542476 |
| Grsf1     | 0.151775 | 0.297538 | 0.543061 |
| Ephb3     | 0.862593 | 0.297752 | 0.54332  |
| Uxt       | 0.216045 | 0.298054 | 0.543624 |
| Spire1    | 0.179785 | 0.298274 | 0.543875 |
| Adcy3     | 0.317134 | 0.298348 | 0.543936 |
| Calcoco1  | 0.153869 | 0.298417 | 0.543936 |
| 4930589O  | 0.683718 | 0.298586 | 0.544112 |
| Nit2      | 0.22108  | 0.298662 | 0.544184 |
| Gm42798   | 0.405772 | 0.298714 | 0.544213 |
| Cct5      | 0.082716 | 0.299319 | 0.544983 |
| Gm16835   | 1.368548 | 0.299618 | 0.545193 |
| Gm15809   | 0.857994 | 0.299688 | 0.545193 |
| Akap17b   | 0.313899 | 0.299669 | 0.545193 |
| Smim4     | 0.174476 | 0.299808 | 0.545299 |
| 4930595L1 | 1.03363  | 0.299863 | 0.545299 |
| Lrrtm2    | 1.024628 | 0.299885 | 0.545299 |
| Eif5b     | 0.074577 | 0.299947 | 0.545331 |
| Nphp4     | 0.696376 | 0.300093 | 0.545398 |
| Usp35     | 0.606276 | 0.300164 | 0.545421 |

|            |          |          |          |
|------------|----------|----------|----------|
| Jmjd8      | 0.215343 | 0.300178 | 0.545421 |
| Spaca6     | 0.172868 | 0.300502 | 0.545814 |
| Commmd5    | 0.654477 | 0.300584 | 0.545829 |
| Vps53      | 0.157292 | 0.300585 | 0.545829 |
| Abcb4      | 0.994534 | 0.300728 | 0.546023 |
| Mfsd5      | 0.207845 | 0.300886 | 0.546177 |
| Phka2      | 0.286894 | 0.301118 | 0.546422 |
| Rdm1       | 0.114226 | 0.30113  | 0.546422 |
| Slc8b1     | 0.254659 | 0.301403 | 0.546717 |
| Atxn2l     | 0.116665 | 0.301635 | 0.54694  |
| Hsf2       | 0.210211 | 0.301806 | 0.547183 |
| Mrps2      | 0.255393 | 0.301895 | 0.547278 |
| Aen        | 0.226001 | 0.301975 | 0.547357 |
| C430049B1  | 0.329231 | 0.302272 | 0.547763 |
| Gm6169     | 1.4739   | 0.302357 | 0.547851 |
| Phyhd1     | 1.402827 | 0.302449 | 0.547886 |
| Rnf183     | 1.172671 | 0.302576 | 0.547983 |
| Ldb1       | 0.128332 | 0.302947 | 0.548455 |
| Yeats2     | 0.17209  | 0.303047 | 0.54857  |
| Tmem53     | 0.428545 | 0.303127 | 0.548583 |
| 1810055G   | 0.353073 | 0.303287 | 0.548804 |
| Dnm3os     | 0.471708 | 0.303474 | 0.549077 |
| Vil1       | 0.234048 | 0.303714 | 0.549166 |
| Proser3    | 0.477878 | 0.30374  | 0.549166 |
| Phospho2   | 0.19078  | 0.30416  | 0.549587 |
| Mrpl10     | 0.193212 | 0.30423  | 0.549648 |
| Gm28875    | 0.209382 | 0.304305 | 0.549702 |
| Otud7a     | 0.67896  | 0.304333 | 0.549702 |
| Gm43421    | 0.677653 | 0.304741 | 0.550174 |
| Mob4       | 0.092867 | 0.304801 | 0.550215 |
| Ebf4       | 0.549942 | 0.30518  | 0.550567 |
| Cbfb       | 0.151137 | 0.305386 | 0.550806 |
| Bdh1       | 0.612343 | 0.305565 | 0.550995 |
| Etfrf1     | 0.181363 | 0.305564 | 0.550995 |
| Gm19196    | 0.632797 | 0.305967 | 0.551521 |
| C1ql1      | 0.732114 | 0.306304 | 0.551863 |
| Ypel1      | 0.663902 | 0.306802 | 0.552622 |
| Dync1li1   | 0.11335  | 0.306889 | 0.552652 |
| Gm45182    | 1.41502  | 0.307071 | 0.552781 |
| Cmtm7      | 0.228931 | 0.307072 | 0.552781 |
| Eloc       | 0.078249 | 0.307055 | 0.552781 |
| St6galnac5 | 0.845551 | 0.30727  | 0.553006 |
| Sar1b      | 0.097161 | 0.307244 | 0.553006 |
| Usb1       | 0.317098 | 0.307391 | 0.553156 |
| Fbxl16     | 0.396205 | 0.307431 | 0.553162 |
| Uqcr10     | 0.060389 | 0.307585 | 0.553372 |
| Smim10l2   | 1.564644 | 0.307756 | 0.553547 |

|          |          |          |          |
|----------|----------|----------|----------|
| Ap5m1    | 0.167901 | 0.307754 | 0.553547 |
| Aqr      | 0.120495 | 0.30784  | 0.553632 |
| P2rx5    | 0.796213 | 0.308475 | 0.55444  |
| Stat5a   | 0.376345 | 0.308745 | 0.554659 |
| Patl1    | 0.16999  | 0.309186 | 0.555185 |
| Cmas     | 0.14826  | 0.309284 | 0.555295 |
| Jazf1    | 1.020384 | 0.309509 | 0.555499 |
| Magt1    | 0.107615 | 0.309477 | 0.555499 |
| Prox1    | 0.42761  | 0.309581 | 0.555561 |
| Gm37079  | 0.935967 | 0.309713 | 0.555664 |
| Ehbp1    | 0.26167  | 0.310124 | 0.556069 |
| Frmd8    | 0.199165 | 0.310263 | 0.556185 |
| Gm10827  | 0.810981 | 0.310581 | 0.556613 |
| Tbc1d23  | 0.135013 | 0.310792 | 0.556734 |
| Inpp5f   | 0.143895 | 0.310858 | 0.556785 |
| Hadha    | 0.093862 | 0.310981 | 0.556792 |
| Mettl23  | 0.132515 | 0.311035 | 0.556792 |
| Gm42664  | 0.598797 | 0.311031 | 0.556792 |
| Zfp507   | 0.208197 | 0.311131 | 0.556807 |
| Czib     | 0.12288  | 0.31132  | 0.557013 |
| 4930579K | 0.513547 | 0.311615 | 0.55742  |
| Tnks     | 0.122834 | 0.311643 | 0.55742  |
| Zfand2b  | 0.144609 | 0.311901 | 0.557586 |
| Nsf      | 0.103695 | 0.311899 | 0.557586 |
| Asl      | 0.196625 | 0.312108 | 0.557776 |
| Mrps23   | 0.161857 | 0.312329 | 0.557889 |
| Clcc1    | 0.132183 | 0.312331 | 0.557889 |
| Timm22   | 0.139471 | 0.31261  | 0.558121 |
| Tcaim    | 0.219397 | 0.313499 | 0.55924  |
| Pcyox1l  | 0.501313 | 0.313643 | 0.559365 |
| Gm49376  | 0.95095  | 0.313844 | 0.559589 |
| lfrd2    | 0.247326 | 0.314046 | 0.559883 |
| Slc2a12  | 0.473421 | 0.314181 | 0.560057 |
| St3gal4  | 0.245519 | 0.314409 | 0.560323 |
| Mfsd6    | 0.13548  | 0.314541 | 0.560323 |
| Smc4     | 0.132858 | 0.314555 | 0.560323 |
| Uxs1     | 0.199142 | 0.314594 | 0.560326 |
| Zmat3    | 0.207903 | 0.314835 | 0.560555 |
| Gm19427  | 1.00125  | 0.315006 | 0.560793 |
| Adprs    | 0.163141 | 0.315295 | 0.561173 |
| Ppp2r5d  | 0.169245 | 0.315624 | 0.561626 |
| Gss      | 0.248243 | 0.315831 | 0.561861 |
| Sspn     | 0.270537 | 0.315908 | 0.561865 |
| Unc13d   | 1.128068 | 0.316184 | 0.562121 |
| Hes7     | 0.845784 | 0.316203 | 0.562121 |
| Nudt7    | 0.221903 | 0.316578 | 0.562656 |
| Slc22a5  | 0.287895 | 0.316708 | 0.562772 |



|          |          |          |          |
|----------|----------|----------|----------|
| C920021L | 0.465575 | 0.316874 | 0.562944 |
| Nr6a1    | 0.372634 | 0.317145 | 0.562944 |
| D530018E | 0.302907 | 0.317428 | 0.562944 |
| Fam98c   | 0.133963 | 0.317446 | 0.562944 |
| Agfg2    | 0.239671 | 0.317455 | 0.562944 |
| Dstn     | 0.053291 | 0.317518 | 0.562986 |
| Gm17891  | 18.93273 | 0.317647 | 0.562998 |
| Stx2     | 0.175978 | 0.317672 | 0.562998 |
| 9530068E | 0.115862 | 0.317674 | 0.562998 |
| Fam102b  | 0.226517 | 0.317896 | 0.563247 |
| Sdhd     | 0.115189 | 0.317961 | 0.563247 |
| Gm45380  | 0.519936 | 0.318023 | 0.563247 |
| Tacc3    | 0.593257 | 0.31804  | 0.563247 |
| Smu1     | 0.114317 | 0.318213 | 0.563474 |
| Gm10557  | 0.602255 | 0.31837  | 0.563606 |
| Asrgl1   | 0.136305 | 0.318407 | 0.563606 |
| Bbs12    | 0.368437 | 0.318525 | 0.563606 |
| Spcs1    | 0.080338 | 0.318581 | 0.563606 |
| Foxq1    | 0.056919 | 0.318669 | 0.563695 |
| Elac1    | 0.197586 | 0.319296 | 0.564404 |
| Cdk9     | 0.101936 | 0.31938  | 0.564434 |
| Tmem106i | 0.361342 | 0.319796 | 0.564708 |
| Cyb5r4   | 0.168267 | 0.319937 | 0.564833 |
| Utp15    | 0.20672  | 0.319967 | 0.564833 |
| Aldh1l2  | 1.208258 | 0.320026 | 0.564833 |
| Ankrd31  | 1.360995 | 0.320132 | 0.564833 |
| Usp39    | 0.175098 | 0.320233 | 0.564833 |
| Gm12322  | 0.897131 | 0.320293 | 0.564833 |
| Gfm1     | 0.184181 | 0.320428 | 0.564871 |
| Ercc3    | 0.185068 | 0.320471 | 0.564881 |
| Fstl1    | 0.14879  | 0.320601 | 0.565043 |
| Lix1     | 0.693064 | 0.320881 | 0.565337 |
| Ttc7     | 0.434369 | 0.321425 | 0.566007 |
| Chchd3   | 0.117773 | 0.321453 | 0.566007 |
| Ubl5     | 0.055217 | 0.32145  | 0.566007 |
| Nabp1    | 0.405586 | 0.321736 | 0.566139 |
| Ppig     | 0.068012 | 0.321752 | 0.566139 |
| Armcx6   | 0.330967 | 0.321803 | 0.566161 |
| 2700097O | 0.248273 | 0.322153 | 0.566512 |
| Dexi     | 0.188129 | 0.322148 | 0.566512 |
| Pafah1b3 | 0.21245  | 0.322532 | 0.567045 |
| Zbtb24   | 0.199105 | 0.322634 | 0.567158 |
| Slc20a1  | 0.180389 | 0.322749 | 0.567228 |
| Sox30    | 1.560231 | 0.322917 | 0.567387 |
| Gm45472  | 2.205037 | 0.322997 | 0.567461 |
| Rbm4b    | 0.14792  | 0.32415  | 0.569353 |
| Gm17529  | 1.116115 | 0.324388 | 0.569505 |

|           |          |          |          |
|-----------|----------|----------|----------|
| Knop1     | 0.109398 | 0.325431 | 0.570797 |
| Dhx8      | 0.170268 | 0.325505 | 0.570797 |
| 1700018A  | 0.221676 | 0.325769 | 0.57094  |
| Etv6      | 0.145743 | 0.32579  | 0.57094  |
| Phldb1    | 0.145456 | 0.325861 | 0.57094  |
| Btf3-ps18 | 1.155837 | 0.326306 | 0.57133  |
| Gm13375   | 0.824186 | 0.326398 | 0.571426 |
| Sar1a     | 0.092162 | 0.326839 | 0.572065 |
| Zhx2      | 0.247247 | 0.326888 | 0.572082 |
| Dnajc5    | 0.084021 | 0.326986 | 0.572188 |
| Pde9a     | 0.486405 | 0.327275 | 0.572492 |
| Calhm2    | 0.208857 | 0.327402 | 0.572647 |
| Mycbp     | 0.158094 | 0.327801 | 0.573279 |
| Slc25a32  | 0.122244 | 0.327884 | 0.57331  |
| Fam98a    | 0.188451 | 0.327929 | 0.57331  |
| Atrnl1    | 0.183266 | 0.328215 | 0.573667 |
| Decr2     | 0.221944 | 0.328398 | 0.573786 |
| Uggt1     | 0.137938 | 0.328485 | 0.573871 |
| Cdnf      | 0.731478 | 0.328647 | 0.574001 |
| Pcdhga3   | 0.705165 | 0.328674 | 0.574001 |
| Gm38157   | 0.360061 | 0.328873 | 0.574231 |
| Acad10    | 0.430801 | 0.3289   | 0.574231 |
| Cyb561d2  | 0.248727 | 0.329171 | 0.574493 |
| Akip1     | 0.170122 | 0.329654 | 0.575108 |
| Gm43774   | 0.511762 | 0.329845 | 0.575374 |
| Gm37534   | 0.477988 | 0.330032 | 0.575567 |
| Zfp418    | 0.531439 | 0.330111 | 0.575615 |
| Zfp112    | 0.597104 | 0.330185 | 0.575632 |
| ENSMUSG   | 0.736003 | 0.330338 | 0.575823 |
| Gm38381   | 0.536656 | 0.330451 | 0.575895 |
| Camk2b    | 0.455962 | 0.330983 | 0.576284 |
| Gm10419   | 0.401161 | 0.330997 | 0.576284 |
| Tmed4     | 0.110206 | 0.331228 | 0.576379 |
| Tbcb      | 0.085831 | 0.331254 | 0.576379 |
| Trak1     | 0.098562 | 0.331306 | 0.576379 |
| 5330439K  | 1.163021 | 0.331398 | 0.576471 |
| Zfp292    | 0.079407 | 0.331623 | 0.576729 |
| Lptm5     | 0.382182 | 0.331828 | 0.576886 |
| Pcdhgb2   | 0.413417 | 0.331906 | 0.576886 |
| Fntb      | 0.259996 | 0.333023 | 0.578196 |
| Tgfb3     | 0.355475 | 0.333164 | 0.578281 |
| Smdt1     | 0.054981 | 0.333172 | 0.578281 |
| Gm42462   | 0.822834 | 0.333463 | 0.578655 |
| Gm17354   | 0.338884 | 0.333487 | 0.578655 |
| Gm44559   | 1.2691   | 0.333619 | 0.578655 |
| Wipf2     | 0.129636 | 0.333599 | 0.578655 |
| Cops4     | 0.110588 | 0.333609 | 0.578655 |

|            |          |          |          |
|------------|----------|----------|----------|
| Ltb        | 2.086253 | 0.333916 | 0.579035 |
| Ints2      | 0.236947 | 0.334034 | 0.579106 |
| Exosc4     | 0.126067 | 0.334092 | 0.57914  |
| Plcxd1     | 1.115814 | 0.334264 | 0.579302 |
| Nedd4      | 0.049376 | 0.334353 | 0.579324 |
| St6galnac4 | 0.16727  | 0.334534 | 0.579392 |
| Neat1      | 0.082707 | 0.334772 | 0.579647 |
| Ggt5       | 0.152281 | 0.335051 | 0.579995 |
| Vps4a      | 0.120092 | 0.335138 | 0.580079 |
| Cep97      | 0.219226 | 0.335688 | 0.580762 |
| Foxj3      | 0.136866 | 0.335751 | 0.580805 |
| Ldlrap1    | 0.131259 | 0.336053 | 0.58126  |
| Ndufb2     | 0.076474 | 0.336724 | 0.582151 |
| Gm12655    | 0.63417  | 0.336984 | 0.582198 |
| Tyro3      | 0.570177 | 0.337186 | 0.582411 |
| A130010J1  | 0.190834 | 0.337363 | 0.582651 |
| Eif2b4     | 0.151933 | 0.337567 | 0.582868 |
| Slc38a9    | 0.152086 | 0.33789  | 0.583234 |
| Gtf2h2     | 0.198469 | 0.338154 | 0.583519 |
| Snapc1     | 0.125024 | 0.338353 | 0.58362  |
| Ube2q1     | 0.097076 | 0.338715 | 0.58411  |
| Gm28437    | 0.519815 | 0.338836 | 0.584116 |
| Cd37       | 0.826792 | 0.339051 | 0.584238 |
| Tor4a      | 0.320323 | 0.339352 | 0.584603 |
| Mcm3       | 0.216741 | 0.340743 | 0.586122 |
| Trim30a    | 0.127197 | 0.340871 | 0.586211 |
| Cldn34c1   | 0.212653 | 0.340873 | 0.586211 |
| Pgm3       | 0.233543 | 0.341116 | 0.586529 |
| Srpr       | 0.073602 | 0.341137 | 0.586529 |
| Gm42737    | 0.430976 | 0.341374 | 0.586787 |
| Cfap97     | 0.136517 | 0.341571 | 0.587006 |
| Fen1       | 0.251525 | 0.341641 | 0.587059 |
| Gm43511    | 0.521906 | 0.341775 | 0.587092 |
| Nol4l      | 0.173271 | 0.341823 | 0.587092 |
| Rwdd1      | 0.075174 | 0.341895 | 0.587092 |
| Lrfn4      | 0.316187 | 0.341895 | 0.587092 |
| Prr3       | 0.262177 | 0.342616 | 0.588263 |
| Frs3       | 0.361798 | 0.342796 | 0.588437 |
| Pds5b      | 0.092648 | 0.342993 | 0.588574 |
| Znhit6     | 0.175214 | 0.343158 | 0.588787 |
| Pxdn       | 0.298873 | 0.343312 | 0.588943 |
| Taf1b      | 0.18159  | 0.343329 | 0.588943 |
| Washc5     | 0.190782 | 0.343704 | 0.589216 |
| Kctd20     | 0.115175 | 0.344337 | 0.589932 |
| Rrp9       | 0.217268 | 0.344775 | 0.590412 |
| Reep2      | 0.4117   | 0.344974 | 0.590685 |
| Gm9925     | 1.580962 | 0.345484 | 0.591032 |

|          |          |          |          |
|----------|----------|----------|----------|
| Inca1    | 0.650657 | 0.345485 | 0.591032 |
| H4c4     | 0.146254 | 0.345682 | 0.59129  |
| Slbp     | 0.128085 | 0.345881 | 0.591562 |
| Rnf149   | 0.238244 | 0.346404 | 0.592165 |
| Lpin2    | 0.151949 | 0.346572 | 0.59223  |
| Rbm27    | 0.09524  | 0.346588 | 0.59223  |
| Rap1gap  | 0.579563 | 0.346829 | 0.592574 |
| Zpbp     | 2.412033 | 0.346916 | 0.592587 |
| Rev1     | 0.141835 | 0.347285 | 0.593083 |
| Dnajb4   | 0.142178 | 0.347415 | 0.593236 |
| Vamp4    | 0.10846  | 0.347519 | 0.593346 |
| Nicn1    | 0.152384 | 0.347711 | 0.593523 |
| Ctu1     | 0.462266 | 0.347958 | 0.593825 |
| Gm42467  | 0.347578 | 0.348141 | 0.59407  |
| Pgam5    | 0.222608 | 0.348244 | 0.594178 |
| ENSMUSG  | 1.500987 | 0.348301 | 0.594207 |
| Tomm5    | 0.095032 | 0.348718 | 0.594682 |
| Dennd4a  | 0.171078 | 0.348778 | 0.594682 |
| D730045B | 0.528149 | 0.348914 | 0.594722 |
| Rcc1     | 0.358395 | 0.348908 | 0.594722 |
| Slc25a39 | 0.124346 | 0.34931  | 0.595319 |
| Nsun3    | 0.288018 | 0.349425 | 0.595447 |
| Larp1    | 0.107171 | 0.349485 | 0.595481 |
| Nans     | 0.18306  | 0.349681 | 0.595576 |
| Plekhh1  | 0.397732 | 0.349774 | 0.595576 |
| Frem2    | 0.458637 | 0.349835 | 0.595576 |
| Ankrd46  | 0.111948 | 0.350091 | 0.595835 |
| 1110020A | 0.41813  | 0.350246 | 0.596031 |
| Sap130   | 0.143372 | 0.350505 | 0.596403 |
| Ptch1    | 0.124314 | 0.350562 | 0.596434 |
| 5430431A | 0.435926 | 0.350818 | 0.596734 |
| Scn2a    | 0.551778 | 0.351147 | 0.596955 |
| A530041M | 0.342512 | 0.351228 | 0.596955 |
| Bcas3    | 0.150168 | 0.351227 | 0.596955 |
| Rtraf-ps | 0.583735 | 0.351404 | 0.597187 |
| Polr2m   | 0.073483 | 0.351531 | 0.597335 |
| Sbk1     | 0.256884 | 0.351672 | 0.597507 |
| Tmem120  | 0.438429 | 0.351774 | 0.597612 |
| Steap2   | 0.235785 | 0.352316 | 0.598372 |
| Kif20b   | 0.486037 | 0.352421 | 0.598372 |
| Hmgb3    | 0.210584 | 0.352407 | 0.598372 |
| Tcirg1   | 0.17025  | 0.352683 | 0.598697 |
| Sox8     | 0.331084 | 0.352886 | 0.598958 |
| Zfp672   | 0.204375 | 0.352932 | 0.598968 |
| Ube2d1   | 0.125238 | 0.353312 | 0.599478 |
| Rnaseh2c | 0.078092 | 0.353557 | 0.599625 |
| Kif1b    | 0.056903 | 0.353584 | 0.599625 |

|           |          |          |          |
|-----------|----------|----------|----------|
| 5730455P: | 0.167551 | 0.35365  | 0.599642 |
| Gnai3     | 0.091955 | 0.353712 | 0.599681 |
| Cpq       | 0.185596 | 0.353787 | 0.599739 |
| Mapt      | 0.199586 | 0.353915 | 0.599888 |
| Slc17a5   | 0.189723 | 0.354099 | 0.59996  |
| Nlrc5     | 0.31795  | 0.354109 | 0.59996  |
| Stmn2     | 0.125222 | 0.354117 | 0.59996  |
| Sirt5     | 0.221461 | 0.354254 | 0.599989 |
| 5330413P: | 0.621288 | 0.355182 | 0.601084 |
| Gm42443   | 0.489896 | 0.355351 | 0.601165 |
| Rer1      | 0.077948 | 0.355518 | 0.60138  |
| Mrps18a   | 0.117419 | 0.355875 | 0.60178  |
| Lcmt2     | 0.293359 | 0.356135 | 0.601948 |
| N4bp2l1   | 0.342073 | 0.356133 | 0.601948 |
| Epm2aip1  | 0.111347 | 0.356264 | 0.602097 |
| D630023F: | 0.789854 | 0.357439 | 0.603402 |
| Nrcam     | 0.368213 | 0.357519 | 0.60347  |
| Unc50     | 0.086193 | 0.35802  | 0.604085 |
| Pkdcc     | 0.278638 | 0.358045 | 0.604085 |
| Gng7      | 0.280688 | 0.358206 | 0.604221 |
| Hspa12b   | 0.083455 | 0.358187 | 0.604221 |
| Gm38077   | 0.495015 | 0.358329 | 0.604291 |
| Kptn      | 0.234506 | 0.35912  | 0.605421 |
| Bhlhe41   | 0.183836 | 0.359244 | 0.605562 |
| Atg16l1   | 0.1529   | 0.359296 | 0.60557  |
| Rnf111    | 0.117556 | 0.35937  | 0.60557  |
| Gm17530   | 1.08444  | 0.359649 | 0.605764 |
| Gm31812   | 0.820356 | 0.359731 | 0.605764 |
| Dzank1    | 0.48267  | 0.359735 | 0.605764 |
| Igf2bp3   | 0.339617 | 0.359784 | 0.605764 |
| Nipsnap2  | 0.122691 | 0.359892 | 0.605836 |
| Supt6     | 0.090733 | 0.360118 | 0.60608  |
| Rnf19b    | 0.210167 | 0.360206 | 0.60616  |
| Gm49164   | 0.836712 | 0.360737 | 0.606769 |
| Noc4l     | 0.293387 | 0.360775 | 0.606769 |
| Lipt1     | 0.50673  | 0.360845 | 0.606769 |
| Eci1      | 0.100988 | 0.360852 | 0.606769 |
| Gm43360   | 0.507455 | 0.361009 | 0.606828 |
| 4632418H: | 0.184101 | 0.361062 | 0.606849 |
| Btf3l4    | 0.178616 | 0.361312 | 0.606954 |
| Vipas39   | 0.173607 | 0.361326 | 0.606954 |
| Fgf12     | 1.217578 | 0.361423 | 0.607048 |
| Pcsk7     | 0.154787 | 0.361661 | 0.607143 |
| Arl6ip1   | 0.060838 | 0.361652 | 0.607143 |
| Mfsd14b   | 0.12411  | 0.361683 | 0.607143 |
| Dapk3     | 0.156479 | 0.361869 | 0.607295 |
| Hibch     | 0.203656 | 0.362158 | 0.607669 |

|           |          |          |          |
|-----------|----------|----------|----------|
| Gm13199   | 0.971881 | 0.362226 | 0.607715 |
| Rbis      | 0.118062 | 0.362379 | 0.607904 |
| Zfp811    | 0.799528 | 0.362427 | 0.607915 |
| Ankrd13b  | 0.457777 | 0.362659 | 0.6081   |
| Gm42731   | 0.225257 | 0.362796 | 0.608177 |
| Gm10752   | 1.135049 | 0.362996 | 0.608257 |
| Fam227a   | 0.320344 | 0.363061 | 0.608298 |
| Gm5854    | 0.3972   | 0.363385 | 0.6085   |
| 7SK-87    | 3.51564  | 0.363604 | 0.608662 |
| 4930547N  | 3.471319 | 0.364221 | 0.609407 |
| Gm43566   | 0.72132  | 0.364238 | 0.609407 |
| Gm17494   | 0.483436 | 0.364399 | 0.609584 |
| Gm5373    | 3.484773 | 0.36469  | 0.609865 |
| D330050I1 | 0.376695 | 0.364751 | 0.609865 |
| 9330151L1 | 0.357064 | 0.364844 | 0.609865 |
| Doc2g     | 0.511309 | 0.365428 | 0.610623 |
| Amn1      | 0.138657 | 0.366    | 0.611375 |
| Rpf2      | 0.237354 | 0.366207 | 0.61148  |
| Cog5      | 0.124273 | 0.366295 | 0.611526 |
| Vps25     | 0.587542 | 0.366361 | 0.611538 |
| F3        | 0.625809 | 0.366544 | 0.611671 |
| Them6     | 0.180883 | 0.366586 | 0.611671 |
| Ube2g1    | 0.108017 | 0.36658  | 0.611671 |
| C1galt1c1 | 0.149016 | 0.367257 | 0.61245  |
| Cnbd2     | 0.392854 | 0.367458 | 0.612649 |
| Nkapd1    | 0.120961 | 0.367892 | 0.61298  |
| Hunk      | 0.539318 | 0.3679   | 0.61298  |
| Mapk15    | 0.786002 | 0.367931 | 0.61298  |
| Gm32151   | 0.806797 | 0.367944 | 0.61298  |
| Tmem86a   | 0.228945 | 0.367938 | 0.61298  |
| St8sia6   | 0.118194 | 0.368026 | 0.613036 |
| Gpn3      | 0.16042  | 0.368059 | 0.613036 |
| Rp9       | 0.071408 | 0.368258 | 0.613094 |
| Usp47     | 0.087644 | 0.368442 | 0.613328 |
| Cdkl3     | 0.278384 | 0.368562 | 0.613328 |
| Sde2      | 0.102784 | 0.368741 | 0.613557 |
| Mad2l1bp  | 0.195771 | 0.368872 | 0.613655 |
| Mob3c     | 0.23357  | 0.369358 | 0.61431  |
| Pisd-ps2  | 0.651351 | 0.369471 | 0.61443  |
| Ndufaf3   | 0.114008 | 0.369756 | 0.614629 |
| Bag5      | 0.086301 | 0.369796 | 0.614629 |
| Zfp945    | 0.161459 | 0.370063 | 0.614893 |
| Arhgap5   | 0.055933 | 0.370078 | 0.614893 |
| Brox      | 0.116742 | 0.371099 | 0.616179 |
| Grhpr     | 0.155823 | 0.37126  | 0.616374 |
| Kcnh2     | 1.287671 | 0.371351 | 0.616374 |
| Tab2      | 0.080382 | 0.371336 | 0.616374 |

|           |          |          |          |
|-----------|----------|----------|----------|
| Rbm38     | 0.462559 | 0.371381 | 0.616374 |
| Nyap2     | 0.977505 | 0.371425 | 0.616379 |
| Nckap5l   | 0.170885 | 0.371549 | 0.616517 |
| Tcaf1     | 0.093239 | 0.371643 | 0.616605 |
| Snrpb     | 0.057747 | 0.371848 | 0.616876 |
| Mcur1     | 0.10975  | 0.372314 | 0.61724  |
| Tnfsf13b  | 1.064449 | 0.37263  | 0.617551 |
| Itprp     | 0.263383 | 0.37262  | 0.617551 |
| Slc22a15  | 0.203881 | 0.372628 | 0.617551 |
| Ptov1     | 0.091102 | 0.372779 | 0.617668 |
| Gm43859   | 0.883546 | 0.372986 | 0.617874 |
| Zfp53     | 0.265206 | 0.373146 | 0.618072 |
| Med8      | 0.127407 | 0.373223 | 0.61813  |
| Tbc1d14   | 0.119878 | 0.373496 | 0.618377 |
| 4732416N  | 0.597793 | 0.374071 | 0.619034 |
| E330037G  | 0.359501 | 0.374168 | 0.619078 |
| Jmjd6     | 0.10462  | 0.374389 | 0.619375 |
| Stk17b    | 0.131321 | 0.374712 | 0.619704 |
| Fry       | 0.050011 | 0.374809 | 0.619709 |
| Dusp4     | 1.118407 | 0.374911 | 0.61976  |
| Sema4d    | 0.772518 | 0.375013 | 0.619861 |
| Myof      | 0.175807 | 0.375087 | 0.619914 |
| Gm2115    | 0.789045 | 0.375469 | 0.620272 |
| Rab5if    | 0.085817 | 0.376177 | 0.621167 |
| Cdo1      | 0.508523 | 0.376902 | 0.622228 |
| Atad2     | 0.162026 | 0.37703  | 0.62237  |
| Phf10     | 0.115262 | 0.377223 | 0.622605 |
| Gm15850   | 0.961408 | 0.377297 | 0.622605 |
| Sfn       | 0.32762  | 0.377281 | 0.622605 |
| Fam222b   | 0.135483 | 0.377533 | 0.622719 |
| Tmem263   | 0.125032 | 0.377682 | 0.622831 |
| Gm19531   | 0.916526 | 0.377802 | 0.622831 |
| Rnps1-ps  | 0.211816 | 0.377831 | 0.622831 |
| Usp46     | 0.095643 | 0.37785  | 0.622831 |
| Rps18-ps6 | 0.080953 | 0.37813  | 0.623224 |
| Hat1      | 0.161513 | 0.378708 | 0.623901 |
| Dchs1     | 0.172266 | 0.379363 | 0.624576 |
| Magoh     | 0.076995 | 0.379446 | 0.624636 |
| Chadl     | 0.541046 | 0.380026 | 0.625012 |
| Gm37174   | 0.488011 | 0.380037 | 0.625012 |
| Chmp6     | 0.122659 | 0.380067 | 0.625012 |
| Gdap1     | 0.459162 | 0.380181 | 0.625012 |
| Cul1      | 0.081243 | 0.380187 | 0.625012 |
| Spryd7    | 0.174196 | 0.380259 | 0.625012 |
| Cryl1     | 0.324743 | 0.380483 | 0.625175 |
| Uba3      | 0.113451 | 0.380815 | 0.625633 |
| Gm42636   | 0.45475  | 0.38109  | 0.625726 |

|           |          |          |          |
|-----------|----------|----------|----------|
| 9230114K: | 0.250979 | 0.381111 | 0.625726 |
| Zbtb10    | 0.130488 | 0.38118  | 0.62577  |
| Abca8b    | 0.396236 | 0.381384 | 0.625835 |
| Lgals8    | 0.108558 | 0.382014 | 0.626797 |
| Gm17435   | 0.593612 | 0.382176 | 0.626892 |
| Capza1    | 0.158153 | 0.382447 | 0.627232 |
| Pja1      | 0.118872 | 0.382622 | 0.62745  |
| Gm43413   | 0.545442 | 0.382759 | 0.627605 |
| Tbc1d1    | 0.098881 | 0.382813 | 0.627624 |
| Skp2      | 0.299374 | 0.382908 | 0.627624 |
| Gm17655   | 0.491803 | 0.38298  | 0.627624 |
| Pigb      | 0.322027 | 0.383182 | 0.627818 |
| Nipsnap1  | 0.18155  | 0.383461 | 0.628    |
| Wdr46     | 0.224374 | 0.383599 | 0.628089 |
| Cyp2u1    | 0.243983 | 0.383861 | 0.62845  |
| BC024063  | 0.790299 | 0.384031 | 0.62859  |
| Gm16386   | 0.652075 | 0.384492 | 0.628932 |
| Gm45495   | 0.40896  | 0.384469 | 0.628932 |
| Nlgn1     | 0.332627 | 0.384542 | 0.628932 |
| Rmdn1     | 0.158195 | 0.384551 | 0.628932 |
| Cyp46a1   | 0.880287 | 0.38463  | 0.628951 |
| 2610027Kl | 0.569278 | 0.38474  | 0.628995 |
| Fam136a   | 0.150076 | 0.384896 | 0.629122 |
| Cptp      | 0.281353 | 0.384902 | 0.629122 |
| Dedd      | 0.153338 | 0.385253 | 0.629558 |
| Dhh       | 0.287489 | 0.38541  | 0.629745 |
| Fig4      | 0.23008  | 0.385576 | 0.629811 |
| Mavs      | 0.207334 | 0.385701 | 0.629823 |
| Fam219b   | 0.116775 | 0.38571  | 0.629823 |
| Rpusd4    | 0.234829 | 0.386121 | 0.629947 |
| Rnf220    | 0.114963 | 0.386124 | 0.629947 |
| Zscan21   | 0.180756 | 0.386266 | 0.630044 |
| Tmub1     | 0.193603 | 0.3868   | 0.630571 |
| Gm12905   | 0.876406 | 0.38719  | 0.631139 |
| Mrrf      | 0.18191  | 0.387609 | 0.631546 |
| Filip1l   | 0.077847 | 0.387699 | 0.631625 |
| Iqcb1     | 0.170834 | 0.38828  | 0.632503 |
| Map3k3    | 0.105982 | 0.388558 | 0.632887 |
| Setmar    | 0.491977 | 0.3888   | 0.633006 |
| Gm37366   | 0.562275 | 0.388975 | 0.633153 |
| Gm3145    | 2.914364 | 0.38906  | 0.633222 |
| Gm3791    | 0.383263 | 0.389146 | 0.633288 |
| Grpel1    | 0.083721 | 0.389185 | 0.633288 |
| Oxnad1    | 0.238779 | 0.389251 | 0.633289 |
| Gm35315   | 0.96007  | 0.389349 | 0.633322 |
| Gm37979   | 1.620574 | 0.389613 | 0.633433 |
| Strip2    | 0.821398 | 0.38988  | 0.633661 |



|           |          |          |          |
|-----------|----------|----------|----------|
| Scyl2     | 0.163447 | 0.39025  | 0.634056 |
| Calm2     | 0.048199 | 0.390413 | 0.634183 |
| Gm20627   | 0.57615  | 0.390753 | 0.634597 |
| Pfkm      | 0.172933 | 0.390931 | 0.634693 |
| Prex1     | 0.136967 | 0.391055 | 0.634693 |
| Tmem175   | 0.229632 | 0.391088 | 0.634693 |
| Rnf11     | 0.075232 | 0.391111 | 0.634693 |
| Vps50     | 0.17978  | 0.391151 | 0.634693 |
| Oaz3      | 2.861918 | 0.391247 | 0.634712 |
| Prr12     | 0.126301 | 0.391517 | 0.634874 |
| Zfpl1     | 0.131936 | 0.391515 | 0.634874 |
| Hemk1     | 0.342312 | 0.391819 | 0.635083 |
| Gm43275   | 0.510357 | 0.391897 | 0.635083 |
| Gm10209   | 0.575938 | 0.391985 | 0.635083 |
| Sirt6     | 0.253365 | 0.392042 | 0.635107 |
| B3gat3    | 0.111713 | 0.392241 | 0.635291 |
| Glb1l     | 0.439112 | 0.392302 | 0.635321 |
| Mtrf1     | 0.335161 | 0.39238  | 0.635379 |
| Gm43034   | 0.538226 | 0.39252  | 0.635468 |
| Gm43359   | 0.228567 | 0.393074 | 0.636021 |
| Gm15506   | 0.38681  | 0.393252 | 0.636172 |
| Thumpd1   | 0.137342 | 0.393504 | 0.636373 |
| Dhfr      | 0.216831 | 0.393584 | 0.636433 |
| Ndufs2    | 0.066267 | 0.393716 | 0.636578 |
| Cers5     | 0.093133 | 0.393963 | 0.636909 |
| Gm37628   | 1.199012 | 0.394048 | 0.636932 |
| Stx8      | 0.100555 | 0.394198 | 0.637013 |
| Nek10     | 2.842832 | 0.394307 | 0.637024 |
| Inpp5d    | 0.149371 | 0.394332 | 0.637024 |
| Slc12a9   | 0.22216  | 0.394549 | 0.637168 |
| Zfyve21   | 0.160265 | 0.394682 | 0.637295 |
| H2bc6     | 0.284242 | 0.395195 | 0.637927 |
| Gclc      | 0.138761 | 0.395232 | 0.637927 |
| ENSMUSG   | 0.532882 | 0.395709 | 0.638078 |
| Gm50340   | 0.639458 | 0.395687 | 0.638078 |
| Def6      | 0.117644 | 0.395688 | 0.638078 |
| Csnk2a2   | 0.093773 | 0.395817 | 0.638184 |
| Cryz      | 0.214732 | 0.396014 | 0.638242 |
| Rnf10     | 0.06405  | 0.396024 | 0.638242 |
| 2900035J1 | 0.30714  | 0.396908 | 0.639346 |
| Rbbp6     | 0.060665 | 0.396922 | 0.639346 |
| Cip2a     | 0.967014 | 0.39718  | 0.639548 |
| Frat2     | 0.343201 | 0.397261 | 0.639548 |
| Tmc6      | 0.17728  | 0.39726  | 0.639548 |
| Rad51b    | 0.749568 | 0.397327 | 0.639584 |
| Gm16552   | 0.676138 | 0.397532 | 0.639717 |
| Fxn       | 0.215798 | 0.397507 | 0.639717 |

|           |          |          |          |
|-----------|----------|----------|----------|
| 4930405J1 | 1.323031 | 0.397646 | 0.639781 |
| Pde4c     | 0.21948  | 0.397663 | 0.639781 |
| Pcdhgc5   | 0.470074 | 0.397788 | 0.639845 |
| Trim68    | 0.354131 | 0.397922 | 0.639993 |
| Rskr      | 0.461404 | 0.398027 | 0.640092 |
| Ncdn      | 0.222183 | 0.398186 | 0.64028  |
| Pou5f1    | 0.646404 | 0.398565 | 0.640683 |
| Lmbr1l    | 0.163441 | 0.398981 | 0.64105  |
| Usp4      | 0.10149  | 0.399008 | 0.64105  |
| Suds3     | 0.0965   | 0.39925  | 0.641163 |
| Ube2z     | 0.100946 | 0.399605 | 0.641601 |
| Atp5pb    | 0.051019 | 0.399608 | 0.641601 |
| Jkamp     | 0.094074 | 0.399727 | 0.641624 |
| Rrp1      | 0.065233 | 0.399742 | 0.641624 |
| Faf1      | 0.130178 | 0.399867 | 0.641741 |
| 4930525G  | 0.934771 | 0.399919 | 0.641756 |
| Tex10     | 0.163592 | 0.40014  | 0.641905 |
| Nt5c2     | 0.087962 | 0.400188 | 0.641913 |
| Rrp1b     | 0.156814 | 0.400296 | 0.64201  |
| Bnip1     | 0.219292 | 0.400334 | 0.64201  |
| Gm14302   | 1.257351 | 0.40082  | 0.642353 |
| Ubtd2     | 0.328126 | 0.401215 | 0.64259  |
| Srp19     | 0.078569 | 0.40137  | 0.64266  |
| 9030025P  | 0.221679 | 0.401383 | 0.64266  |
| Gm12840   | 0.455638 | 0.401647 | 0.642888 |
| Sart3     | 0.159274 | 0.401781 | 0.642888 |
| Plekha5   | 0.137994 | 0.401806 | 0.642888 |
| Tmem205   | 0.094789 | 0.401826 | 0.642888 |
| Ccser1    | 0.280841 | 0.402305 | 0.643367 |
| Naf1      | 0.133289 | 0.402674 | 0.643716 |
| Zfp599    | 0.57238  | 0.402688 | 0.643716 |
| Zfp335os  | 0.550208 | 0.403065 | 0.644181 |
| Ccdc159   | 1.254883 | 0.403282 | 0.644322 |
| Pdcd2l    | 0.179448 | 0.403515 | 0.644556 |
| Hkdc1     | 0.776338 | 0.403822 | 0.644716 |
| Slc25a44  | 0.178546 | 0.403823 | 0.644716 |
| Arhgap23  | 0.109452 | 0.403838 | 0.644716 |
| Eif1ad    | 0.107113 | 0.404004 | 0.644856 |
| Tnik      | 0.515648 | 0.40405  | 0.644861 |
| Gna12     | 0.103066 | 0.404266 | 0.645044 |
| Eif2ak3   | 0.193537 | 0.404294 | 0.645044 |
| Cryzl2    | 0.329479 | 0.404707 | 0.645352 |
| A430010J1 | 1.195494 | 0.404938 | 0.645352 |
| Llgl2     | 0.210428 | 0.405088 | 0.645352 |
| Mrpl11    | 0.095346 | 0.405109 | 0.645352 |
| Triqk     | 0.180452 | 0.405161 | 0.645352 |
| Maged1    | 0.079865 | 0.405396 | 0.645633 |

|           |          |          |          |
|-----------|----------|----------|----------|
| Gm38355   | 0.919572 | 0.405785 | 0.645976 |
| Klhl15    | 0.217212 | 0.405768 | 0.645976 |
| C1qa      | 0.544324 | 0.405882 | 0.646062 |
| Cep250    | 0.118638 | 0.405933 | 0.646075 |
| Cyren     | 0.163143 | 0.405977 | 0.646077 |
| 5430402O  | 0.631997 | 0.406315 | 0.646272 |
| Cfap46    | 1.102412 | 0.406549 | 0.646506 |
| Zfp622    | 0.113743 | 0.406629 | 0.646565 |
| Pcnp      | 0.059355 | 0.406786 | 0.646676 |
| Iffo1     | 0.179912 | 0.407069 | 0.646909 |
| Yaf2      | 0.084541 | 0.407077 | 0.646909 |
| Capn15    | 0.156319 | 0.407179 | 0.646909 |
| Rnps1     | 0.083767 | 0.407321 | 0.646909 |
| Arhgap27c | 0.24579  | 0.407319 | 0.646909 |
| Gm38292   | 0.225189 | 0.407665 | 0.647317 |
| Gatd3a    | 0.141658 | 0.407892 | 0.64757  |
| Flywch1   | 0.107771 | 0.408127 | 0.647697 |
| Zbed5     | 0.518141 | 0.408163 | 0.647697 |
| Matr3     | 0.061242 | 0.408263 | 0.647737 |
| Stoml1    | 0.177202 | 0.408366 | 0.647799 |
| 5033403F  | 1.42133  | 0.408487 | 0.647799 |
| Pmpca     | 0.149616 | 0.408494 | 0.647799 |
| Zdhhc5    | 0.114465 | 0.408674 | 0.647958 |
| Gm15265   | 0.812722 | 0.408772 | 0.648044 |
| Arl5a     | 0.106791 | 0.408832 | 0.648071 |
| Rybp      | 0.086025 | 0.408955 | 0.648197 |
| Syt11     | 0.146204 | 0.40907  | 0.648283 |
| Zbed4     | 0.290131 | 0.409614 | 0.648845 |
| Fam174a   | 0.074986 | 0.409875 | 0.648845 |
| Map2k2    | 0.074416 | 0.41002  | 0.648845 |
| Alg9      | 0.216453 | 0.410361 | 0.648977 |
| Fnbp1     | 0.12431  | 0.410392 | 0.648977 |
| Stx6      | 0.0961   | 0.41043  | 0.648977 |
| Abcf2     | 0.132827 | 0.410487 | 0.648977 |
| Wdr43     | 0.11054  | 0.410571 | 0.649016 |
| Gstz1     | 0.219933 | 0.41062  | 0.649016 |
| Mtch2     | 0.092976 | 0.410704 | 0.649045 |
| Faah      | 0.351555 | 0.41088  | 0.649255 |
| Ppat      | 0.204893 | 0.411577 | 0.650032 |
| Gm49694   | 0.6297   | 0.411589 | 0.650032 |
| Qsox2     | 0.164854 | 0.411869 | 0.650337 |
| Phax      | 0.083518 | 0.412092 | 0.650544 |
| Gm45873   | 0.504536 | 0.41213  | 0.650544 |
| Pcbd1     | 0.882747 | 0.412697 | 0.651138 |
| Mboat1    | 0.295961 | 0.412885 | 0.651186 |
| 4833438C  | 0.262667 | 0.412881 | 0.651186 |
| Fam53a    | 0.12247  | 0.413212 | 0.651497 |

|           |          |          |          |
|-----------|----------|----------|----------|
| Ccs       | 0.109802 | 0.413261 | 0.651497 |
| Ccdc157   | 0.174322 | 0.413299 | 0.651497 |
| Nemp2     | 0.252388 | 0.413579 | 0.6518   |
| Gars      | 0.100533 | 0.413711 | 0.651902 |
| Dennd1a   | 0.117302 | 0.413731 | 0.651902 |
| Gm44677   | 2.551825 | 0.413845 | 0.651946 |
| Hdhd5     | 0.278392 | 0.414044 | 0.65209  |
| Yap1      | 0.091282 | 0.414068 | 0.65209  |
| Nfrkb     | 0.121192 | 0.414442 | 0.652277 |
| Prickle2  | 0.195193 | 0.41458  | 0.652416 |
| B630019Kl | 0.241079 | 0.415161 | 0.652919 |
| Gm37106   | 0.334121 | 0.415819 | 0.653838 |
| Gm37783   | 0.191714 | 0.416133 | 0.654211 |
| Crebl2    | 0.123269 | 0.416157 | 0.654211 |
| Prss38    | 0.891914 | 0.416424 | 0.654408 |
| Sec31a    | 0.083542 | 0.416465 | 0.654408 |
| Gm38366   | 0.435686 | 0.416533 | 0.654408 |
| Nanos1    | 0.174628 | 0.416589 | 0.654408 |
| Impa2     | 0.152895 | 0.416887 | 0.65474  |
| Ankrd24   | 0.207418 | 0.417076 | 0.654968 |
| 6030460B  | 0.432624 | 0.417264 | 0.655009 |
| Tulp4     | 0.070287 | 0.417263 | 0.655009 |
| Nek8      | 0.366394 | 0.417343 | 0.655009 |
| B130021Kl | 0.31302  | 0.417365 | 0.655009 |
| Adk       | 0.14095  | 0.417561 | 0.655179 |
| Gcc1      | 0.174788 | 0.417698 | 0.655326 |
| Efna2     | 0.735898 | 0.417852 | 0.655499 |
| Plekhd1   | 0.549755 | 0.418332 | 0.656046 |
| Morn5     | 1.087614 | 0.418643 | 0.656327 |
| Lmo4      | 0.096021 | 0.418913 | 0.65665  |
| Dcaf12    | 0.126233 | 0.418965 | 0.65665  |
| Coprs     | 0.187211 | 0.419024 | 0.65665  |
| Bcl9      | 0.169765 | 0.419329 | 0.657058 |
| Igsf21    | 0.311388 | 0.41939  | 0.657085 |
| Lsm12     | 0.087271 | 0.419838 | 0.65744  |
| Ahcyl2    | 0.124223 | 0.419855 | 0.65744  |
| Hax1      | 0.116756 | 0.420092 | 0.657635 |
| Abhd11os  | 0.553962 | 0.42016  | 0.657673 |
| Zfp746    | 0.143203 | 0.420224 | 0.657704 |
| Bmp1      | 0.231634 | 0.420279 | 0.657721 |
| Prrg1     | 0.107082 | 0.420535 | 0.657846 |
| Thap11    | 0.116658 | 0.420858 | 0.658183 |
| Gucd1     | 0.178244 | 0.421138 | 0.658309 |
| Gm37510   | 0.457354 | 0.421359 | 0.658396 |
| Prkaa1    | 0.126582 | 0.421763 | 0.65884  |
| Klhl32    | 0.617775 | 0.421778 | 0.65884  |
| Zc3h14    | 0.085151 | 0.42227  | 0.659321 |

|          |          |          |          |
|----------|----------|----------|----------|
| Proca1   | 0.628542 | 0.422467 | 0.659456 |
| Gm42715  | 0.336367 | 0.422533 | 0.659456 |
| Atp2b4   | 0.112433 | 0.422953 | 0.659871 |
| Phf13    | 0.181295 | 0.42315  | 0.660006 |
| Gm9403   | 0.660956 | 0.423421 | 0.66036  |
| Fam126a  | 0.131942 | 0.423588 | 0.660483 |
| Gprasp2  | 0.225322 | 0.424014 | 0.66087  |
| Cct7     | 0.058233 | 0.424057 | 0.66087  |
| Slc1a5   | 0.233651 | 0.424167 | 0.660974 |
| Pdcd6ip  | 0.068905 | 0.424359 | 0.661135 |
| Gm40466  | 0.437968 | 0.424803 | 0.661585 |
| Gm42869  | 0.508748 | 0.424848 | 0.661585 |
| Gm14403  | 0.303505 | 0.425501 | 0.662392 |
| Gm12992  | 0.371222 | 0.425538 | 0.662392 |
| Ufm1     | 0.087137 | 0.42559  | 0.662392 |
| Niban1   | 0.113326 | 0.425839 | 0.662612 |
| Mir1931  | 0.328301 | 0.426    | 0.662657 |
| 1810024B | 0.309288 | 0.425998 | 0.662657 |
| Chka     | 0.097354 | 0.426191 | 0.662885 |
| Gzmm     | 0.198748 | 0.427888 | 0.664947 |
| Cisd1    | 0.080015 | 0.427982 | 0.664947 |
| Trp53rkb | 0.197824 | 0.428269 | 0.665288 |
| Cflar    | 0.070559 | 0.428362 | 0.665364 |
| Atf7ip   | 0.071212 | 0.428796 | 0.66579  |
| Col4a1   | 0.042871 | 0.42901  | 0.665955 |
| Psma4    | 0.058718 | 0.429202 | 0.666095 |
| Cstf1    | 0.201743 | 0.429438 | 0.666095 |
| Alg8     | 0.418998 | 0.42955  | 0.666095 |
| Zfp941   | 0.30625  | 0.429565 | 0.666095 |
| Arl10    | 0.202428 | 0.429758 | 0.666241 |
| Mfsd1    | 0.113051 | 0.429773 | 0.666241 |
| Dagla    | 0.404257 | 0.429935 | 0.66626  |
| Cox6b1   | 0.041507 | 0.430032 | 0.666298 |
| Pds5a    | 0.078968 | 0.430186 | 0.666467 |
| Macroh2a | 0.063076 | 0.430945 | 0.667362 |
| Prcc     | 0.148092 | 0.431033 | 0.667362 |
| Prkx     | 0.103284 | 0.431169 | 0.667362 |
| Atxn7l3b | 0.047899 | 0.431209 | 0.667362 |
| Ube2j2   | 0.096917 | 0.431372 | 0.667477 |
| Klc1     | 0.06897  | 0.431832 | 0.66805  |
| Ttll11   | 0.306174 | 0.431937 | 0.668143 |
| Smim8    | 0.134986 | 0.432061 | 0.668266 |
| Zkscan5  | 0.238268 | 0.432498 | 0.668855 |
| Gm28731  | 0.513932 | 0.432531 | 0.668855 |
| Ube2s    | 0.231339 | 0.432601 | 0.668894 |
| Mtftp1   | 0.272093 | 0.432686 | 0.668906 |
| Gpr137   | 0.178052 | 0.432743 | 0.668907 |

|          |          |          |          |
|----------|----------|----------|----------|
| Gm12540  | 0.991188 | 0.433137 | 0.669174 |
| 1700096K | 0.198938 | 0.433173 | 0.669174 |
| Wdr33    | 0.068429 | 0.43318  | 0.669174 |
| Mex3a    | 0.496368 | 0.433745 | 0.669588 |
| Gpt2     | 0.465552 | 0.433766 | 0.669588 |
| Cnot6l   | 0.051779 | 0.434014 | 0.669903 |
| Pfn4     | 0.929241 | 0.43423  | 0.670167 |
| Bphl     | 0.14551  | 0.434394 | 0.670218 |
| Actl6a   | 0.08778  | 0.434427 | 0.670218 |
| Ciao3    | 0.177121 | 0.434797 | 0.67038  |
| Rnaseh1  | 0.176898 | 0.434887 | 0.67038  |
| Wdr91    | 0.183873 | 0.435049 | 0.67038  |
| Pes1     | 0.136565 | 0.435085 | 0.67038  |
| Gm42783  | 0.303849 | 0.435522 | 0.670985 |
| Piga     | 0.207867 | 0.435624 | 0.67099  |
| H1f1     | 1.169229 | 0.435728 | 0.67099  |
| Actb     | 0.028456 | 0.435698 | 0.67099  |
| Mrpl20   | 0.062815 | 0.435942 | 0.671218 |
| Fhad1    | 0.59653  | 0.436181 | 0.671447 |
| Rnf135   | 0.211399 | 0.436667 | 0.671927 |
| Gm41804  | 0.802027 | 0.437358 | 0.672508 |
| Mrpl1    | 0.143954 | 0.437384 | 0.672508 |
| Osbp     | 0.101186 | 0.437401 | 0.672508 |
| Marchf5  | 0.086995 | 0.437409 | 0.672508 |
| Cnnm2    | 0.177186 | 0.43754  | 0.672572 |
| Gm12902  | 0.775398 | 0.43828  | 0.673295 |
| Pcdhga5  | 0.353365 | 0.438277 | 0.673295 |
| Smarca4  | 0.071719 | 0.438389 | 0.673323 |
| Ypel3    | 0.060102 | 0.438611 | 0.673527 |
| Abtb2    | 0.685089 | 0.439209 | 0.67408  |
| Gm26803  | 1.436192 | 0.439241 | 0.67408  |
| Tfap2b   | 0.490776 | 0.439732 | 0.674556 |
| Cc2d1a   | 0.203541 | 0.439887 | 0.674725 |
| Sptlc1   | 0.120784 | 0.440014 | 0.674781 |
| 4732496C | 0.507134 | 0.44022  | 0.675018 |
| Rcc2     | 0.139278 | 0.44036  | 0.675036 |
| Gm4285   | 0.30403  | 0.44048  | 0.67515  |
| Rnf207   | 0.165541 | 0.440892 | 0.675504 |
| Glb1     | 0.188712 | 0.441276 | 0.676025 |
| Ncapd3   | 0.145416 | 0.44138  | 0.676114 |
| Gm38104  | 0.355924 | 0.441673 | 0.676488 |
| Slc6a1   | 0.239965 | 0.441715 | 0.676488 |
| Kdm4d    | 0.933715 | 0.441873 | 0.676662 |
| Gm45407  | 0.289475 | 0.442028 | 0.676739 |
| Mrc2     | 0.195663 | 0.442634 | 0.677429 |
| Lrrfip2  | 0.0959   | 0.442793 | 0.677516 |
| Gm44953  | 0.812666 | 0.442858 | 0.677547 |

|          |          |          |          |
|----------|----------|----------|----------|
| Polr2l   | 0.132226 | 0.442914 | 0.677563 |
| Commd8   | 0.098684 | 0.443508 | 0.678194 |
| Cs       | 0.091286 | 0.44392  | 0.678686 |
| Nubp1    | 0.184121 | 0.444156 | 0.678819 |
| Rbm15b   | 0.133833 | 0.444779 | 0.679445 |
| Spata24  | 0.323493 | 0.444992 | 0.679585 |
| Tmem39b  | 0.174268 | 0.445094 | 0.679631 |
| Tex14    | 0.729221 | 0.445128 | 0.679631 |
| Gm13269  | 0.796229 | 0.445569 | 0.680095 |
| Lrrc70   | 0.286924 | 0.445639 | 0.680133 |
| Wrnip1   | 0.122852 | 0.445929 | 0.680398 |
| Notch2   | 0.191733 | 0.446054 | 0.680489 |
| Polr2j   | 0.068482 | 0.446909 | 0.681586 |
| Tcte2    | 0.298464 | 0.447256 | 0.681976 |
| InsI5    | 0.616587 | 0.44777  | 0.682689 |
| Uqcrq    | 0.044619 | 0.447883 | 0.682792 |
| Chl1     | 0.824786 | 0.448082 | 0.682949 |
| Zfp275   | 0.161958 | 0.448587 | 0.683564 |
| Nup107   | 0.204336 | 0.44897  | 0.683942 |
| Stau2    | 0.14685  | 0.449013 | 0.683942 |
| Gm43778  | 0.795151 | 0.449067 | 0.683942 |
| Rnf180   | 0.586453 | 0.449687 | 0.684612 |
| Rprd1b   | 0.08992  | 0.449758 | 0.684612 |
| Coro2b   | 0.099062 | 0.449885 | 0.684681 |
| Zfp867   | 0.252078 | 0.45048  | 0.68544  |
| Trabd    | 0.104836 | 0.450718 | 0.685682 |
| Mta2     | 0.0897   | 0.450813 | 0.685723 |
| Arhgap25 | 0.175311 | 0.451072 | 0.686047 |
| Mpp3     | 0.613828 | 0.45137  | 0.686361 |
| Sec13    | 0.08709  | 0.451855 | 0.686889 |
| Gm7143   | 0.572724 | 0.451952 | 0.686968 |
| Ccnk     | 0.111325 | 0.452136 | 0.687041 |
| Bivm     | 0.194722 | 0.45248  | 0.687491 |
| Usp49    | 0.233151 | 0.452575 | 0.687565 |
| D330041H | 0.271442 | 0.452663 | 0.687629 |
| Utp14a   | 0.114145 | 0.453491 | 0.688677 |
| Gm43909  | 1.157789 | 0.453595 | 0.68868  |
| Actr3b   | 0.345767 | 0.453668 | 0.68868  |
| Fkbp9    | 0.081137 | 0.454247 | 0.689336 |
| Psrc1    | 0.996548 | 0.45434  | 0.689406 |
| Mrpl32   | 0.093287 | 0.454474 | 0.68954  |
| Cd68     | 0.581774 | 0.454717 | 0.68956  |
| Reln     | 0.948871 | 0.454905 | 0.689705 |
| Gm49915  | 0.553763 | 0.455011 | 0.689796 |
| Trim27   | 0.123731 | 0.455131 | 0.689838 |
| Gm37465  | 0.32073  | 0.455112 | 0.689838 |
| Abca6    | 0.636081 | 0.455497 | 0.690183 |

|          |          |          |          |
|----------|----------|----------|----------|
| Phf14    | 0.067464 | 0.455874 | 0.690405 |
| Megf6    | 0.098415 | 0.45605  | 0.690571 |
| Tcp11l1  | 0.233335 | 0.456084 | 0.690571 |
| Gm16075  | 0.966837 | 0.456168 | 0.690571 |
| Snip1    | 0.146883 | 0.45615  | 0.690571 |
| Lmtk2    | 0.152094 | 0.456583 | 0.690977 |
| Bbs5     | 0.157139 | 0.456883 | 0.691234 |
| Cybrd1   | 1.135082 | 0.457039 | 0.691345 |
| Plekhb2  | 0.107198 | 0.457095 | 0.691345 |
| Hspa8    | 0.034377 | 0.457255 | 0.691411 |
| Fbxl8    | 0.196851 | 0.457405 | 0.691482 |
| Gfer     | 0.140943 | 0.458252 | 0.692432 |
| Rhno1    | 0.178625 | 0.458277 | 0.692432 |
| H2ac8    | 0.323293 | 0.458322 | 0.692432 |
| Zfp260   | 0.089417 | 0.458441 | 0.692541 |
| Klhdc10  | 0.114999 | 0.458591 | 0.692604 |
| Gm37906  | 0.235156 | 0.458754 | 0.692604 |
| Rgmb     | 0.120571 | 0.45876  | 0.692604 |
| Adnp     | 0.182588 | 0.458898 | 0.692742 |
| Pja2     | 0.063174 | 0.458977 | 0.692792 |
| Snw1     | 0.061185 | 0.45923  | 0.693099 |
| Gm42748  | 0.286238 | 0.459916 | 0.693654 |
| Gm38220  | 0.50336  | 0.460047 | 0.693707 |
| Nxn      | 0.083975 | 0.460489 | 0.694305 |
| Map3k2   | 0.085578 | 0.460736 | 0.694342 |
| Ston1    | 0.158615 | 0.460746 | 0.694342 |
| Cep162   | 0.132126 | 0.460879 | 0.694472 |
| Amigo1   | 0.237174 | 0.461244 | 0.694794 |
| Gm12971  | 0.559626 | 0.461325 | 0.694794 |
| Gm15348  | 1.155383 | 0.461554 | 0.695    |
| Dipk1b   | 0.250995 | 0.461628 | 0.695042 |
| Zfp706   | 0.058309 | 0.461938 | 0.69536  |
| Atg7     | 0.188071 | 0.461979 | 0.69536  |
| Dcun1d1  | 0.10498  | 0.462565 | 0.695963 |
| Gm13421  | 0.6398   | 0.463007 | 0.696296 |
| Coasy    | 0.15959  | 0.463008 | 0.696296 |
| Gm45640  | 0.558351 | 0.463106 | 0.696296 |
| Tmem108  | 0.187118 | 0.463096 | 0.696296 |
| Zdhhc7   | 0.145641 | 0.463118 | 0.696296 |
| Paox     | 0.24256  | 0.463144 | 0.696296 |
| Gm37219  | 0.716638 | 0.463483 | 0.696643 |
| Rab27a   | 0.305464 | 0.463566 | 0.696657 |
| St7l     | 0.109528 | 0.463591 | 0.696657 |
| Gm44550  | 0.388852 | 0.463631 | 0.696657 |
| Kdm8     | 0.404348 | 0.463825 | 0.696809 |
| Rnf168   | 0.100604 | 0.463926 | 0.696888 |
| 6330415G | 0.878758 | 0.463972 | 0.696888 |



|           |          |          |          |
|-----------|----------|----------|----------|
| Lemd3     | 0.121042 | 0.46402  | 0.696891 |
| Rep15     | 0.256634 | 0.464089 | 0.696925 |
| Man2b1    | 0.098647 | 0.464171 | 0.696979 |
| Hps6      | 0.229185 | 0.464547 | 0.697403 |
| Gm42840   | 0.534129 | 0.464871 | 0.697495 |
| Zfp940    | 0.3649   | 0.464959 | 0.697531 |
| Sec61g    | 0.072051 | 0.465259 | 0.697562 |
| Csrnp2    | 0.30584  | 0.465711 | 0.698006 |
| Wfs1      | 0.173099 | 0.466009 | 0.698326 |
| Shisa2    | 0.833645 | 0.466158 | 0.69842  |
| Hid1      | 0.177613 | 0.46622  | 0.698443 |
| Cdc25a    | 0.162855 | 0.466352 | 0.698572 |
| Zfp689    | 0.276498 | 0.466499 | 0.698648 |
| Gart      | 0.15032  | 0.466711 | 0.698697 |
| Gm15489   | 0.946565 | 0.466959 | 0.698711 |
| Lnpep     | 0.062868 | 0.466925 | 0.698711 |
| Gtpbp3    | 0.196478 | 0.466935 | 0.698711 |
| Gm16201   | 0.419714 | 0.467227 | 0.699042 |
| Shq1      | 0.285169 | 0.467459 | 0.699115 |
| Tmem129   | 0.192695 | 0.467713 | 0.699254 |
| Nln       | 0.271169 | 0.467771 | 0.699254 |
| Rnf145    | 0.130585 | 0.467977 | 0.699326 |
| Rpp25l    | 0.094237 | 0.468194 | 0.69958  |
| Trim24    | 0.075909 | 0.468911 | 0.700442 |
| Ppp1r18os | 0.458245 | 0.46905  | 0.700511 |
| Fancc     | 0.247506 | 0.469425 | 0.700794 |
| Gm37710   | 0.974012 | 0.469426 | 0.700794 |
| Acadm     | 0.06747  | 0.469678 | 0.700919 |
| Mgmt      | 0.202495 | 0.469692 | 0.700919 |
| Cap1      | 0.06213  | 0.469767 | 0.700952 |
| Alms1     | 0.208858 | 0.469951 | 0.701157 |
| Gm45358   | 0.601772 | 0.470192 | 0.701258 |
| Fam229b   | 0.245892 | 0.470159 | 0.701258 |
| Psme3ip1  | 0.096927 | 0.470206 | 0.701258 |
| Phf2os1   | 0.799072 | 0.470385 | 0.701455 |
| A930018P  | 0.538774 | 0.470508 | 0.701568 |
| Gm42531   | 1.222082 | 0.470609 | 0.701648 |
| Gm9522    | 1.124142 | 0.470782 | 0.70173  |
| Mrpl35    | 0.101758 | 0.470781 | 0.70173  |
| Zfp202    | 0.334214 | 0.470805 | 0.70173  |
| Tbc1d2    | 0.243622 | 0.471317 | 0.702285 |
| Nrxn2     | 0.292218 | 0.471511 | 0.702437 |
| Zfp983    | 0.230063 | 0.471518 | 0.702437 |
| Gm43625   | 0.596424 | 0.471582 | 0.702437 |
| B230219D  | 0.044659 | 0.471647 | 0.702437 |
| Gm48582   | 0.230159 | 0.471703 | 0.702441 |
| Usp53     | 0.06191  | 0.471936 | 0.702644 |

|          |          |          |          |
|----------|----------|----------|----------|
| Etv5     | 0.243815 | 0.471981 | 0.702644 |
| Gm20604  | 0.183369 | 0.472065 | 0.702644 |
| Gm44668  | 0.267065 | 0.472074 | 0.702644 |
| Ube2o    | 0.131941 | 0.472129 | 0.702656 |
| 1110003F | 0.413984 | 0.472286 | 0.702772 |
| H2ax     | 0.143784 | 0.472431 | 0.702772 |
| Gm3854   | 0.660411 | 0.472442 | 0.702772 |
| 2900045O | 1.084624 | 0.472592 | 0.702925 |
| Parp4    | 0.08698  | 0.472731 | 0.702945 |
| Ubr4     | 0.07199  | 0.472745 | 0.702945 |
| Rnf113a2 | 0.134291 | 0.473035 | 0.703235 |
| Aarsd1   | 0.275201 | 0.473152 | 0.70334  |
| Mitd1    | 0.103642 | 0.473684 | 0.703934 |
| Cpeb2    | 0.150716 | 0.473846 | 0.703947 |
| Cenpn    | 0.522582 | 0.473863 | 0.703947 |
| Sec23ip  | 0.112828 | 0.47416  | 0.704278 |
| Rbks     | 0.291771 | 0.474219 | 0.704278 |
| Nploc4   | 0.129247 | 0.474675 | 0.704833 |
| Mettl17  | 0.202721 | 0.475303 | 0.705272 |
| Zfp652   | 0.066214 | 0.475308 | 0.705272 |
| Kiss1r   | 0.549917 | 0.475315 | 0.705272 |
| C1qtnf4  | 0.131507 | 0.475337 | 0.705272 |
| Bbc3     | 0.171224 | 0.475348 | 0.705272 |
| Tpbg     | 0.360416 | 0.475463 | 0.705329 |
| Usp14    | 0.096524 | 0.47548  | 0.705329 |
| Mapkbp1  | 0.156367 | 0.475534 | 0.705339 |
| Tent2    | 0.109945 | 0.475685 | 0.705493 |
| Ptma-ps2 | 0.402572 | 0.475975 | 0.705783 |
| Zfp14    | 0.298144 | 0.476077 | 0.705866 |
| Tmem268  | 0.294107 | 0.476151 | 0.705905 |
| Gm16262  | 1.229608 | 0.476289 | 0.705938 |
| Bcl9l    | 0.086562 | 0.476254 | 0.705938 |
| Rhou     | 0.333089 | 0.476429 | 0.705938 |
| Nrip3    | 0.62421  | 0.476443 | 0.705938 |
| Gm46378  | 0.537756 | 0.477039 | 0.706242 |
| Erh      | 0.077897 | 0.477515 | 0.706703 |
| Clpb     | 0.136858 | 0.478076 | 0.707116 |
| Serf1    | 0.204801 | 0.47852  | 0.707186 |
| Gm11491  | 0.65441  | 0.478589 | 0.707186 |
| Dram2    | 0.066104 | 0.478625 | 0.707186 |
| Tlnrd1   | 0.089738 | 0.478752 | 0.707186 |
| Fuom     | 0.177682 | 0.478805 | 0.707186 |
| Incenp   | 0.205158 | 0.478872 | 0.707208 |
| Sap18b   | 0.30067  | 0.47895  | 0.707253 |
| Dera     | 0.18362  | 0.479048 | 0.707329 |
| Atxn1l   | 0.109375 | 0.479208 | 0.707494 |
| Gm50232  | 0.373068 | 0.479678 | 0.707844 |

|           |          |          |          |
|-----------|----------|----------|----------|
| Gm37660   | 0.311537 | 0.479681 | 0.707844 |
| Nfatc2ip  | 0.173589 | 0.479784 | 0.707879 |
| Slc24a5   | 0.136518 | 0.479847 | 0.707879 |
| Amy1      | 0.27502  | 0.480033 | 0.708081 |
| Gm45464   | 0.327349 | 0.4803   | 0.708269 |
| Gm6710    | 0.350205 | 0.480994 | 0.708733 |
| Mapre3    | 0.088122 | 0.481184 | 0.708944 |
| Cgn       | 0.596513 | 0.481811 | 0.709326 |
| Nipsnap3b | 0.109213 | 0.481822 | 0.709326 |
| Aifm1     | 0.116945 | 0.4819   | 0.70937  |
| Ptgds     | 0.187091 | 0.482105 | 0.709533 |
| H4c1      | 0.517628 | 0.482466 | 0.709671 |
| Lingo3    | 0.341498 | 0.482531 | 0.709671 |
| Spata6l   | 0.106452 | 0.482519 | 0.709671 |
| Sh2d1a    | 0.172878 | 0.482852 | 0.709796 |
| Mrps26    | 0.07803  | 0.482862 | 0.709796 |
| Aamp      | 0.065011 | 0.4829   | 0.709796 |
| Nsmce4a   | 0.065526 | 0.483204 | 0.71005  |
| Gm47259   | 0.887739 | 0.483434 | 0.71005  |
| Gm49486   | 0.410392 | 0.48341  | 0.71005  |
| Gm10010   | 0.770204 | 0.483425 | 0.71005  |
| Egln2     | 0.075245 | 0.483434 | 0.71005  |
| 5330432J1 | 0.119294 | 0.48362  | 0.71005  |
| Gm45570   | 0.570739 | 0.48364  | 0.71005  |
| Tomm40    | 0.106232 | 0.483837 | 0.71005  |
| Alg6      | 0.14479  | 0.483844 | 0.71005  |
| Ppie      | 0.110431 | 0.483993 | 0.71005  |
| Rtn3      | 0.045633 | 0.484117 | 0.71005  |
| Rest      | 0.078971 | 0.484341 | 0.71031  |
| E4f1      | 0.1185   | 0.484712 | 0.710644 |
| Gm49703   | 0.307821 | 0.484768 | 0.710644 |
| Sumf2     | 0.162118 | 0.484766 | 0.710644 |
| Git2      | 0.046925 | 0.484925 | 0.710678 |
| Gm12758   | 0.192706 | 0.485067 | 0.710818 |
| Gm45130   | 1.799943 | 0.485239 | 0.711    |
| Gm37383   | 0.726786 | 0.485371 | 0.711054 |
| Dock2     | 0.967687 | 0.48562  | 0.711279 |
| Mansc1    | 0.191043 | 0.485846 | 0.711365 |
| Purg      | 0.161095 | 0.485991 | 0.711376 |
| C330018D  | 0.279777 | 0.486094 | 0.711376 |
| Anks1b    | 0.806466 | 0.486113 | 0.711376 |
| Cc2d1b    | 0.166726 | 0.486289 | 0.711564 |
| 4931414P  | 0.317166 | 0.4865   | 0.711703 |
| Glo1-ps   | 0.414209 | 0.486587 | 0.711703 |
| Nop16     | 0.173214 | 0.48667  | 0.711703 |
| Sgpp1     | 0.112436 | 0.486724 | 0.711714 |
| Vsx1      | 1.333791 | 0.486865 | 0.711767 |

|           |          |          |          |
|-----------|----------|----------|----------|
| Fam228a   | 1.106144 | 0.487112 | 0.712003 |
| Calb1     | 0.605757 | 0.487439 | 0.712272 |
| Kbtbd2    | 0.079828 | 0.487608 | 0.712379 |
| Etv3      | 0.10053  | 0.487865 | 0.71257  |
| Naa38     | 0.068131 | 0.488077 | 0.712717 |
| Pacrg     | 0.338387 | 0.488891 | 0.713628 |
| Usp30     | 0.205804 | 0.489121 | 0.713771 |
| Dxo       | 0.133182 | 0.489179 | 0.713771 |
| Zfp963    | 0.355867 | 0.489262 | 0.713771 |
| Nptxr     | 0.281924 | 0.489516 | 0.713904 |
| Faf2      | 0.083137 | 0.49069  | 0.715017 |
| Hs6st1    | 0.202579 | 0.490939 | 0.715222 |
| Gm46136   | 1.067264 | 0.491616 | 0.716138 |
| Zfp995    | 0.333903 | 0.491705 | 0.716199 |
| Leprotl1  | 0.081198 | 0.491926 | 0.716381 |
| Gm39326   | 0.782436 | 0.492192 | 0.71658  |
| Exosc3    | 0.110663 | 0.492295 | 0.71658  |
| Tatdn2    | 0.132933 | 0.49233  | 0.71658  |
| Rps6ka6   | 0.585715 | 0.49235  | 0.71658  |
| Hip1r     | 0.081826 | 0.492667 | 0.716902 |
| Nom1      | 0.102293 | 0.49299  | 0.717199 |
| Loxl2     | 0.20223  | 0.493448 | 0.71776  |
| Gm38309   | 0.538268 | 0.493622 | 0.717944 |
| Gm37132   | 0.316471 | 0.493682 | 0.71796  |
| Eapp      | 0.061427 | 0.49394  | 0.718196 |
| 2610301B  | 0.149308 | 0.494043 | 0.718207 |
| Ppfia4    | 0.747658 | 0.494823 | 0.719061 |
| Gm16192   | 0.546313 | 0.495342 | 0.719675 |
| Xrcc3     | 0.840102 | 0.495745 | 0.72006  |
| Atp13a2   | 0.118363 | 0.495751 | 0.72006  |
| Ccdc93    | 0.170254 | 0.496569 | 0.720782 |
| Chp1      | 0.078346 | 0.496569 | 0.720782 |
| Zfp524    | 0.129006 | 0.496584 | 0.720782 |
| Gm44560   | 0.685472 | 0.497125 | 0.721147 |
| Dbf4      | 0.279019 | 0.498098 | 0.721929 |
| Gm44775   | 0.552613 | 0.498202 | 0.722009 |
| Sel1l3    | 1.049978 | 0.498323 | 0.722114 |
| Lrfrn2    | 0.724853 | 0.498547 | 0.722246 |
| Uckl1     | 0.094675 | 0.498571 | 0.722246 |
| Farsb     | 0.101595 | 0.498606 | 0.722246 |
| Plcg2     | 0.201489 | 0.498818 | 0.722302 |
| Riok2     | 0.137547 | 0.498838 | 0.722302 |
| Jrk       | 0.324473 | 0.49898  | 0.722437 |
| Pdzd4     | 0.357985 | 0.499233 | 0.722529 |
| Zcchc18   | 0.247875 | 0.499731 | 0.723105 |
| Snhg17    | 0.236291 | 0.499909 | 0.723293 |
| 9430087J2 | 0.355133 | 0.500061 | 0.723362 |

|          |          |          |          |
|----------|----------|----------|----------|
| Cfl2     | 0.061122 | 0.500081 | 0.723362 |
| Slc35f2  | 0.082634 | 0.500101 | 0.723362 |
| Zfand5   | 0.051151 | 0.500244 | 0.723498 |
| Gm10602  | 0.481359 | 0.500533 | 0.723633 |
| Zdhhc23  | 0.826689 | 0.50057  | 0.723633 |
| 5830408C | 0.190111 | 0.500651 | 0.723633 |
| Bmp2k    | 0.112961 | 0.500675 | 0.723633 |
| Dgkd     | 0.109725 | 0.500916 | 0.72384  |
| Gm45120  | 0.318552 | 0.501772 | 0.724866 |
| Atad1    | 0.086377 | 0.501952 | 0.724918 |
| Rims3    | 0.384021 | 0.502182 | 0.725111 |
| Gm15580  | 0.66837  | 0.502459 | 0.725371 |
| Senp2    | 0.085006 | 0.503275 | 0.725988 |
| Psma3    | 0.0437   | 0.503421 | 0.726129 |
| Rpn1     | 0.064551 | 0.503821 | 0.726637 |
| Dnajc17  | 0.131554 | 0.504065 | 0.726806 |
| Snca     | 0.418506 | 0.504164 | 0.726806 |
| Arhgap19 | 0.285909 | 0.504182 | 0.726806 |
| Mfsd4b1  | 1.646269 | 0.504417 | 0.726831 |
| S1pr2    | 0.317611 | 0.504442 | 0.726831 |
| Gm5608   | 1.658851 | 0.505162 | 0.727281 |
| Gm43813  | 0.653897 | 0.505246 | 0.727281 |
| Znrf3    | 0.123505 | 0.505287 | 0.727281 |
| Gm37860  | 0.471951 | 0.505368 | 0.727281 |
| Sec24c   | 0.096348 | 0.505386 | 0.727281 |
| Fgd1     | 0.153598 | 0.506152 | 0.728174 |
| Urod     | 0.091433 | 0.506249 | 0.728239 |
| Sf3b6    | 0.053423 | 0.506294 | 0.728239 |
| Pcdhga7  | 0.308716 | 0.506753 | 0.728829 |
| Ddx19a   | 0.12957  | 0.506988 | 0.729068 |
| Whamm    | 0.104733 | 0.507047 | 0.729068 |
| Csf1r    | 0.432979 | 0.507381 | 0.729354 |
| Kcnmb4   | 0.25878  | 0.507677 | 0.72941  |
| Acvr2b   | 0.120247 | 0.507693 | 0.72941  |
| Akt2     | 0.103865 | 0.507924 | 0.729601 |
| Scarna2  | 0.869871 | 0.508063 | 0.729661 |
| Gm49492  | 0.134034 | 0.508356 | 0.729942 |
| Exoc6b   | 0.070093 | 0.508464 | 0.729957 |
| Plscr4   | 0.065259 | 0.508579 | 0.729982 |
| 5830454E | 0.292467 | 0.508981 | 0.730349 |
| Pex11a   | 0.195637 | 0.509088 | 0.730363 |
| Kcnq1    | 0.167463 | 0.509206 | 0.730444 |
| H2-DMa   | 0.342501 | 0.509529 | 0.730698 |
| Pex14    | 0.122872 | 0.509566 | 0.730698 |
| Gm49329  | 0.289494 | 0.509989 | 0.730959 |
| Gabrb3   | 0.399425 | 0.509992 | 0.730959 |
| Zfp423   | 0.114974 | 0.510576 | 0.731646 |

|          |          |          |          |
|----------|----------|----------|----------|
| Nme2     | 0.186684 | 0.510639 | 0.731646 |
| Lig3     | 0.129994 | 0.510667 | 0.731646 |
| Vps37d   | 0.3237   | 0.511334 | 0.732182 |
| Garnl3   | 0.255273 | 0.511334 | 0.732182 |
| Fam241b  | 0.373669 | 0.511438 | 0.732223 |
| Smtn     | 0.080304 | 0.51158  | 0.732223 |
| Gm42735  | 0.227487 | 0.511702 | 0.732223 |
| Setd7    | 0.079597 | 0.51188  | 0.732223 |
| Spg20    | 0.093492 | 0.511892 | 0.732223 |
| Mid2     | 0.142445 | 0.511901 | 0.732223 |
| Gm6712   | 0.302489 | 0.511978 | 0.732226 |
| Gm29055  | 0.638202 | 0.512134 | 0.732347 |
| Ntrk2    | 0.430265 | 0.512426 | 0.732546 |
| Fstl5    | 0.826387 | 0.512455 | 0.732546 |
| Tnks2    | 0.05516  | 0.512469 | 0.732546 |
| Tspyl2   | 0.130172 | 0.512618 | 0.732631 |
| Gm20172  | 0.961888 | 0.512878 | 0.7328   |
| Traf4    | 0.24065  | 0.513023 | 0.7328   |
| Pate2    | 0.918722 | 0.513302 | 0.7328   |
| Parp9    | 0.098437 | 0.51344  | 0.7328   |
| Gm30025  | 0.158255 | 0.513445 | 0.7328   |
| 2310043P | 0.639902 | 0.513625 | 0.7328   |
| Gripap1  | 0.085521 | 0.513778 | 0.732875 |
| Tmem185l | 0.141698 | 0.513907 | 0.732922 |
| Zfp457   | 0.941619 | 0.514    | 0.732985 |
| Echdc2   | 0.442953 | 0.515256 | 0.734286 |
| Adgrl1   | 0.102883 | 0.515317 | 0.734304 |
| Wdsub1   | 0.119861 | 0.515514 | 0.734393 |
| Nelfe    | 0.103136 | 0.515717 | 0.734463 |
| 4930526A | 0.528134 | 0.515938 | 0.734629 |
| Gm44037  | 0.546295 | 0.516314 | 0.735025 |
| Cenpu    | 0.717326 | 0.516773 | 0.735539 |
| Gm43203  | 0.433735 | 0.516993 | 0.735781 |
| Naa12    | 0.068985 | 0.517347 | 0.736214 |
| Gsr      | 0.102178 | 0.517409 | 0.736233 |
| 4930570G | 0.373667 | 0.517644 | 0.736376 |
| Gm45890  | 0.51816  | 0.517874 | 0.736545 |
| Prim2    | 0.230233 | 0.518112 | 0.736659 |
| Cdin1    | 0.346098 | 0.518145 | 0.736659 |
| Gm9970   | 0.557232 | 0.518202 | 0.736661 |
| Gm34655  | 0.95486  | 0.518309 | 0.736674 |
| Gar1     | 0.095565 | 0.518277 | 0.736674 |
| Ddah2    | 0.066094 | 0.518364 | 0.736682 |
| Rcor3    | 0.087977 | 0.518876 | 0.73734  |
| Wdr81    | 0.212032 | 0.519178 | 0.737492 |
| Carmil1  | 0.121879 | 0.519222 | 0.737492 |
| Ccdc107  | 0.077758 | 0.519229 | 0.737492 |

|            |          |          |          |
|------------|----------|----------|----------|
| Atp5a1     | 0.035741 | 0.519657 | 0.737819 |
| Erc2       | 0.361734 | 0.519724 | 0.737841 |
| Zscan30    | 0.496084 | 0.520188 | 0.73817  |
| Slc2a4rg-p | 0.292662 | 0.520298 | 0.73817  |
| Gm49327    | 0.288424 | 0.520775 | 0.738472 |
| Lancl1     | 0.129631 | 0.520759 | 0.738472 |
| Utp6       | 0.111419 | 0.520809 | 0.738472 |
| Arid1b     | 0.07561  | 0.520893 | 0.738472 |
| Gm44116    | 0.500838 | 0.520906 | 0.738472 |
| Nle1       | 0.252201 | 0.521098 | 0.738535 |
| Slc35f6    | 0.145081 | 0.521388 | 0.738806 |
| Hdac8      | 0.188971 | 0.522214 | 0.739626 |
| Gng12      | 0.058363 | 0.522696 | 0.740122 |
| Bicdl1     | 0.119016 | 0.522731 | 0.740122 |
| Trim41     | 0.096695 | 0.52291  | 0.740192 |
| Dnase1l2   | 0.480653 | 0.522973 | 0.740211 |
| Maf        | 0.181162 | 0.523551 | 0.7408   |
| Gm26793    | 0.719948 | 0.523587 | 0.7408   |
| Slc25a29   | 0.226429 | 0.523718 | 0.740916 |
| Gm20186    | 0.203633 | 0.523831 | 0.741005 |
| Inafm1     | 0.082058 | 0.524031 | 0.741148 |
| Desi1      | 0.095294 | 0.524189 | 0.741232 |
| Gm14325    | 0.332625 | 0.524415 | 0.741292 |
| Rab3b      | 0.350102 | 0.524629 | 0.741363 |
| C730034F   | 0.248135 | 0.524681 | 0.741367 |
| Zfp61      | 0.198562 | 0.524832 | 0.741511 |
| Nap1l1     | 0.049735 | 0.525003 | 0.741659 |
| Mxi1       | 0.063385 | 0.525036 | 0.741659 |
| Mgat2      | 0.070634 | 0.525473 | 0.742205 |
| Mtfmt      | 0.161626 | 0.525707 | 0.742243 |
| Gm12094    | 0.74067  | 0.525784 | 0.742243 |
| A930023M   | 0.474153 | 0.525828 | 0.742243 |
| Gskip      | 0.101157 | 0.525846 | 0.742243 |
| Nt5m       | 0.133437 | 0.526005 | 0.742374 |
| 2610001JC  | 0.067232 | 0.526442 | 0.742804 |
| Nynrin     | 0.109341 | 0.527093 | 0.743442 |
| Mtmr4      | 0.137311 | 0.527298 | 0.743661 |
| Fam53b     | 0.083951 | 0.528113 | 0.744329 |
| D630036H   | 0.443075 | 0.528189 | 0.744329 |
| Mrps5      | 0.0736   | 0.528187 | 0.744329 |
| Gm17227    | 0.837294 | 0.528268 | 0.744329 |
| Zcwpw2     | 0.557135 | 0.528982 | 0.744984 |
| 9430081H   | 0.328507 | 0.528997 | 0.744984 |
| Crb2       | 0.206454 | 0.529149 | 0.745078 |
| Tmtc4      | 0.141387 | 0.529597 | 0.74543  |
| Zfp939     | 0.244728 | 0.529648 | 0.74543  |
| Ccdc87     | 0.948912 | 0.529748 | 0.745456 |

|          |          |          |          |
|----------|----------|----------|----------|
| Ndel1    | 0.07993  | 0.53013  | 0.745851 |
| AA386476 | 0.270626 | 0.530282 | 0.745851 |
| Kmt5c    | 0.149477 | 0.53084  | 0.746337 |
| Tbc1d2b  | 0.133757 | 0.531104 | 0.746436 |
| Gm6477   | 0.369067 | 0.531341 | 0.746436 |
| Ptprk    | 0.067838 | 0.531447 | 0.746436 |
| Nup54    | 0.1154   | 0.531495 | 0.746436 |
| Gm32031  | 0.148661 | 0.531559 | 0.746436 |
| Nacc1    | 0.091618 | 0.53158  | 0.746436 |
| Cnep1r1  | 0.081201 | 0.531589 | 0.746436 |
| Gm47572  | 0.557707 | 0.531641 | 0.746436 |
| Zdhhc4   | 0.099387 | 0.531653 | 0.746436 |
| Gm37443  | 0.382417 | 0.531665 | 0.746436 |
| Zyg11b   | 0.068505 | 0.531709 | 0.746436 |
| 1600020E | 0.107356 | 0.532565 | 0.747242 |
| Sdhc     | 0.060399 | 0.5328   | 0.747478 |
| Gm48949  | 0.521815 | 0.533301 | 0.74796  |
| Rbm33    | 0.078278 | 0.533394 | 0.74796  |
| 9530051G | 0.612109 | 0.533819 | 0.748282 |
| Ppp1ccb  | 0.572215 | 0.533928 | 0.74836  |
| Mrpl40   | 0.094163 | 0.534015 | 0.748411 |
| Dcps     | 0.113498 | 0.534321 | 0.74863  |
| Tgs1     | 0.070795 | 0.534416 | 0.748692 |
| Cep112   | 0.128808 | 0.534547 | 0.748805 |
| Jak2     | 0.074272 | 0.534607 | 0.74882  |
| Thap6    | 0.315498 | 0.534704 | 0.748886 |
| Klhl9    | 0.062805 | 0.535115 | 0.749016 |
| Elmod2   | 0.105356 | 0.535237 | 0.749016 |
| Mnat1    | 0.084271 | 0.535298 | 0.749016 |
| Rps6kb1  | 0.06141  | 0.535554 | 0.749235 |
| Dcaf10   | 0.101562 | 0.536042 | 0.749467 |
| C1qb     | 0.447111 | 0.537081 | 0.75067  |
| Sf3b5    | 0.055563 | 0.537232 | 0.750741 |
| Smarcd2  | 0.092708 | 0.537451 | 0.750854 |
| Pik3r3   | 0.071175 | 0.537598 | 0.750972 |
| 4833408A | 0.240412 | 0.537854 | 0.751259 |
| Gm17207  | 0.605862 | 0.53801  | 0.751337 |
| Enah     | 0.081907 | 0.53812  | 0.751351 |
| Nmd3     | 0.104199 | 0.538449 | 0.751739 |
| Rfc2     | 0.092052 | 0.538498 | 0.751739 |
| Gm45718  | 0.382417 | 0.538607 | 0.75182  |
| Dhx33    | 0.199569 | 0.5391   | 0.752229 |
| Endov    | 0.153101 | 0.539189 | 0.752249 |
| Gm37399  | 0.163802 | 0.539232 | 0.752249 |
| Exoc3    | 0.070696 | 0.539266 | 0.752249 |
| Dennd5a  | 0.045415 | 0.539332 | 0.752272 |
| Tulp3    | 0.135717 | 0.539595 | 0.752403 |



|           |          |          |          |
|-----------|----------|----------|----------|
| Pus10     | 0.176723 | 0.539614 | 0.752403 |
| Rspry1    | 0.077304 | 0.539627 | 0.752403 |
| Gm42890   | 0.919919 | 0.540005 | 0.752718 |
| Tmem251   | 0.112374 | 0.539995 | 0.752718 |
| Cnih4     | 0.053157 | 0.540372 | 0.752879 |
| Gm45871   | 0.185872 | 0.540496 | 0.752983 |
| 2810021J2 | 0.367176 | 0.540961 | 0.75328  |
| Zfp931    | 0.124259 | 0.541065 | 0.753355 |
| Gprin2    | 0.52386  | 0.541186 | 0.753454 |
| Pdcd7     | 0.089375 | 0.54203  | 0.754093 |
| Ptk7      | 0.247256 | 0.542055 | 0.754093 |
| Usp2      | 0.11214  | 0.542099 | 0.754093 |
| Taf6      | 0.105186 | 0.542724 | 0.754682 |
| Med7      | 0.088723 | 0.543031 | 0.754924 |
| Rbms2     | 0.083421 | 0.5431   | 0.754924 |
| Gm49937   | 0.369135 | 0.543119 | 0.754924 |
| Utp23     | 0.123804 | 0.543201 | 0.754924 |
| Cdipt     | 0.073116 | 0.543667 | 0.755291 |
| Eif3g     | 0.052471 | 0.543762 | 0.755354 |
| Nr1d2     | 0.058358 | 0.543852 | 0.755408 |
| Kyat3     | 0.214819 | 0.544076 | 0.75565  |
| Zfp830    | 0.094198 | 0.544245 | 0.755744 |
| Nras      | 0.05626  | 0.544343 | 0.755811 |
| Lmtk3     | 0.430184 | 0.544612 | 0.755947 |
| B230317F  | 0.915042 | 0.544724 | 0.755947 |
| Klhl7     | 0.107341 | 0.544745 | 0.755947 |
| Fcho2     | 0.039967 | 0.544928 | 0.756026 |
| Lrba      | 0.081772 | 0.545049 | 0.756044 |
| Gm11960   | 0.631996 | 0.545117 | 0.756044 |
| 6030442K  | 0.330642 | 0.545498 | 0.756431 |
| Abi1      | 0.053373 | 0.545746 | 0.756635 |
| Serpinh1  | 0.04426  | 0.545925 | 0.756814 |
| Gm42843   | 0.219101 | 0.546243 | 0.757013 |
| Ubox5     | 0.219063 | 0.546341 | 0.757013 |
| Sec61a1   | 0.059761 | 0.546563 | 0.757013 |
| Vdac2     | 0.039487 | 0.546575 | 0.757013 |
| Ccdc89    | 0.447027 | 0.546716 | 0.75707  |
| Tmem161   | 0.097505 | 0.54681  | 0.757129 |
| Sae1      | 0.077113 | 0.546876 | 0.75715  |
| Gm38067   | 0.403288 | 0.547115 | 0.757411 |
| Zcchc17   | 0.058799 | 0.547793 | 0.757696 |
| Gm49767   | 0.179591 | 0.547826 | 0.757696 |
| Gm16041   | 1.030563 | 0.547796 | 0.757696 |
| Coq2      | 0.088698 | 0.548249 | 0.75802  |
| Cyp7b1    | 0.198387 | 0.548365 | 0.75802  |
| Xylt2     | 0.138556 | 0.548483 | 0.758114 |
| Fmo5      | 0.111851 | 0.549071 | 0.758738 |

|            |          |          |          |
|------------|----------|----------|----------|
| Top3b      | 0.093473 | 0.549447 | 0.759026 |
| Myef2      | 0.078722 | 0.550193 | 0.7598   |
| Sec63      | 0.048657 | 0.550517 | 0.759955 |
| Hmga1      | 0.287328 | 0.550526 | 0.759955 |
| A330074K   | 0.44433  | 0.550599 | 0.759987 |
| Mcm2       | 0.180914 | 0.550675 | 0.760021 |
| Polr2f     | 0.051657 | 0.550874 | 0.760085 |
| Rwdd4a     | 0.086453 | 0.551077 | 0.760226 |
| Glrbl      | 0.34209  | 0.551174 | 0.760244 |
| Keap1      | 0.066998 | 0.551385 | 0.76044  |
| Gm43696    | 0.16715  | 0.551746 | 0.760798 |
| Gm14634    | 0.54654  | 0.552281 | 0.761466 |
| Emc7       | 0.044524 | 0.552845 | 0.762032 |
| Thoc6      | 0.15455  | 0.55298  | 0.762056 |
| Gm9042     | 0.634857 | 0.553015 | 0.762056 |
| Rabl3      | 0.154682 | 0.553175 | 0.762137 |
| Slirp      | 0.059272 | 0.553527 | 0.76234  |
| Zfp516     | 0.077368 | 0.553679 | 0.76241  |
| Rgr        | 0.548243 | 0.554003 | 0.762755 |
| Zbtb1      | 0.089536 | 0.554031 | 0.762755 |
| Mapk1ip1   | 0.089391 | 0.554085 | 0.762759 |
| Sphk1      | 0.471973 | 0.554445 | 0.762974 |
| 9130401V   | 0.113882 | 0.554525 | 0.763013 |
| Gm37305    | 0.199382 | 0.554752 | 0.763254 |
| Rgs20      | 0.174338 | 0.555019 | 0.763482 |
| Mrgpre     | 0.160517 | 0.555347 | 0.763628 |
| Dhx40      | 0.073566 | 0.555522 | 0.763628 |
| Gm48375    | 0.204672 | 0.55557  | 0.763628 |
| Nat2       | 0.275712 | 0.555584 | 0.763628 |
| Gm43032    | 0.479849 | 0.555583 | 0.763628 |
| Cnksr3     | 0.112396 | 0.55581  | 0.763799 |
| Hs6st2     | 0.922445 | 0.555973 | 0.763941 |
| Racgap1    | 0.334958 | 0.55635  | 0.76419  |
| Slc10a4-ps | 1.344092 | 0.556597 | 0.764356 |
| Gm11423    | 0.326968 | 0.556853 | 0.764524 |
| Fndc3a     | 0.066103 | 0.557001 | 0.764524 |
| Gm15829    | 0.64576  | 0.557377 | 0.764764 |
| Al413582   | 0.133743 | 0.55743  | 0.764764 |
| Entpd2     | 0.356179 | 0.557444 | 0.764764 |
| Rad23a     | 0.066822 | 0.557431 | 0.764764 |
| Gm10605    | 0.46196  | 0.557573 | 0.764817 |
| Pex19      | 0.082902 | 0.557624 | 0.764817 |
| Pld4       | 0.621064 | 0.557964 | 0.765201 |
| Ndufs3     | 0.061237 | 0.558052 | 0.765201 |
| Limd2      | 0.159858 | 0.558099 | 0.765201 |
| Nutf2-ps1  | 0.279231 | 0.558108 | 0.765201 |
| Flot2      | 0.109416 | 0.55844  | 0.765516 |

|           |          |          |          |
|-----------|----------|----------|----------|
| D6Wsu163  | 0.168365 | 0.558785 | 0.765848 |
| Akt1s1    | 0.090709 | 0.559071 | 0.765854 |
| Gm48708   | 0.540842 | 0.559146 | 0.765854 |
| Gm49683   | 0.420771 | 0.559415 | 0.766081 |
| Zfp189    | 0.181296 | 0.559511 | 0.766142 |
| Slc35g1   | 0.608511 | 0.560739 | 0.767473 |
| Gabbr1    | 0.082796 | 0.560794 | 0.767478 |
| Mtfr1     | 0.095792 | 0.560987 | 0.767671 |
| Necab2    | 0.243171 | 0.561221 | 0.767852 |
| 2810049E  | 0.688707 | 0.561394 | 0.767931 |
| Gas2l1    | 0.084206 | 0.561478 | 0.767931 |
| Gm42729   | 0.491095 | 0.561594 | 0.768011 |
| Spg11     | 0.186204 | 0.561758 | 0.768165 |
| Tmem28    | 1.310034 | 0.56187  | 0.768178 |
| Fxyd2     | 0.468313 | 0.561843 | 0.768178 |
| Hspb11    | 0.091846 | 0.562022 | 0.768246 |
| Slc9a3r1  | 0.086813 | 0.562146 | 0.768344 |
| Zfp704    | 0.062339 | 0.562358 | 0.768458 |
| Rbm45     | 0.197585 | 0.562651 | 0.768542 |
| Abhd14a   | 0.099754 | 0.562735 | 0.768542 |
| Csnk1g3   | 0.070163 | 0.562734 | 0.768542 |
| Sardh     | 0.214117 | 0.562873 | 0.768589 |
| Gm50431   | 0.22311  | 0.56289  | 0.768589 |
| Rbak      | 0.120865 | 0.563665 | 0.769157 |
| Ss18      | 0.072378 | 0.563976 | 0.769372 |
| Znhit3    | 0.103736 | 0.564036 | 0.769383 |
| Rpl29-ps2 | 0.576716 | 0.564312 | 0.769642 |
| Ass1      | 0.080346 | 0.564329 | 0.769642 |
| Rel2      | 0.401381 | 0.564605 | 0.769886 |
| Zdbf2     | 0.371162 | 0.565204 | 0.770205 |
| Prkd3     | 0.052438 | 0.56563  | 0.77052  |
| Slc39a11  | 0.277517 | 0.565809 | 0.770678 |
| Gtf2h1    | 0.08502  | 0.566374 | 0.771236 |
| Tmem266   | 0.466713 | 0.566878 | 0.771713 |
| Stk4      | 0.087933 | 0.566981 | 0.771713 |
| Ccdc73    | 0.260414 | 0.567286 | 0.771979 |
| Gm17951   | 0.498427 | 0.567331 | 0.771979 |
| Smndc1    | 0.062832 | 0.567539 | 0.772097 |
| Socs1     | 0.181542 | 0.567959 | 0.772207 |
| BC060293  | 0.178796 | 0.568191 | 0.772377 |
| Gm9442    | 0.5201   | 0.568373 | 0.772392 |
| Gm37268   | 0.737336 | 0.568485 | 0.772392 |
| Fbh1      | 0.094752 | 0.568564 | 0.772392 |
| Gm4876    | 0.313385 | 0.569274 | 0.773146 |
| Gm37868   | 0.688784 | 0.569681 | 0.773384 |
| Grip1     | 0.382916 | 0.569796 | 0.773384 |
| Mbd5      | 0.091311 | 0.57041  | 0.773864 |

|           |          |          |          |
|-----------|----------|----------|----------|
| Rhobtb2   | 0.138627 | 0.570424 | 0.773864 |
| Foxk1     | 0.088777 | 0.570585 | 0.773864 |
| Cbarp     | 0.256807 | 0.57064  | 0.773864 |
| Zc3h18    | 0.07055  | 0.571051 | 0.77402  |
| Pipox     | 0.754474 | 0.571172 | 0.77404  |
| Txn14b    | 0.280861 | 0.572108 | 0.774944 |
| Odf2      | 0.089784 | 0.57215  | 0.774944 |
| Gm37943   | 0.416248 | 0.572795 | 0.775453 |
| 4921531C  | 0.24787  | 0.572889 | 0.775453 |
| 1700028K  | 0.47554  | 0.573259 | 0.775744 |
| Usp10     | 0.085412 | 0.573405 | 0.775802 |
| Gga1      | 0.081661 | 0.574364 | 0.776538 |
| Rgl3      | 0.25542  | 0.574411 | 0.776538 |
| Vma21     | 0.074704 | 0.574802 | 0.776778 |
| Lamtor5   | 0.043695 | 0.574992 | 0.776965 |
| Plpp2     | 0.144161 | 0.575428 | 0.777274 |
| Sp6       | 0.243884 | 0.575973 | 0.777659 |
| Rab26os   | 0.171062 | 0.576147 | 0.777825 |
| Arhgdib   | 0.058604 | 0.576346 | 0.777859 |
| Gm43466   | 0.312478 | 0.57638  | 0.777859 |
| Gnptab    | 0.113932 | 0.57646  | 0.777896 |
| Rimbp3    | 0.691038 | 0.576618 | 0.778039 |
| Atp5h     | 0.025685 | 0.576904 | 0.778267 |
| Hba-a1    | 0.188677 | 0.576943 | 0.778267 |
| Gm43445   | 0.359933 | 0.577005 | 0.778281 |
| Gm9958    | 0.411502 | 0.577637 | 0.779046 |
| Tmem151   | 0.42963  | 0.577676 | 0.779046 |
| Dph5      | 0.161155 | 0.577955 | 0.779181 |
| Tmem19    | 0.114722 | 0.577985 | 0.779181 |
| Arpin     | 0.125494 | 0.578076 | 0.779223 |
| Diras2    | 0.167824 | 0.579027 | 0.779954 |
| Rpph1     | 0.886557 | 0.579354 | 0.780254 |
| AW04620   | 0.275582 | 0.579534 | 0.780304 |
| Mfn1      | 0.082315 | 0.57959  | 0.780304 |
| Rpl10-ps6 | 0.480841 | 0.57979  | 0.780421 |
| Arhgap24  | 0.169956 | 0.579896 | 0.780449 |
| Vkorc1l1  | 0.081665 | 0.57999  | 0.780449 |
| Itga4     | 0.099564 | 0.580059 | 0.780449 |
| 4732491K  | 0.283429 | 0.580083 | 0.780449 |
| Mtif3     | 0.096757 | 0.580124 | 0.780449 |
| Cplx1     | 0.576063 | 0.580191 | 0.78047  |
| Ribc1     | 0.363297 | 0.58053  | 0.780785 |
| Angpt2    | 0.115505 | 0.580758 | 0.781021 |
| Cad       | 0.147004 | 0.581147 | 0.781301 |
| Plekha4   | 0.352124 | 0.581175 | 0.781301 |
| Glo1      | 0.034167 | 0.581304 | 0.78136  |
| Gm48961   | 0.49749  | 0.581743 | 0.781783 |

|          |          |          |          |
|----------|----------|----------|----------|
| Yju2     | 0.105033 | 0.581879 | 0.78179  |
| 1700088E | 0.252786 | 0.581904 | 0.78179  |
| Dffb     | 0.163241 | 0.582028 | 0.781864 |
| A930037H | 0.212389 | 0.58221  | 0.78192  |
| Ccdc47   | 0.044838 | 0.582347 | 0.782034 |
| Pcif1    | 0.057056 | 0.582512 | 0.782111 |
| E2f3     | 0.171223 | 0.582561 | 0.782111 |
| B130034C | 0.358409 | 0.582756 | 0.782217 |
| Akirin1  | 0.057239 | 0.582792 | 0.782217 |
| Rtca     | 0.085769 | 0.583473 | 0.782634 |
| Pcdhb16  | 0.168843 | 0.583526 | 0.782635 |
| Cetn4    | 0.158357 | 0.583857 | 0.782968 |
| Ddx28    | 0.154335 | 0.584126 | 0.782968 |
| Xxylt1   | 0.110704 | 0.584181 | 0.782968 |
| Gpr89    | 0.091675 | 0.584266 | 0.782968 |
| Cep170b  | 0.148164 | 0.584392 | 0.782968 |
| 9530056K | 0.787251 | 0.584439 | 0.782968 |
| Cir1     | 0.070953 | 0.584492 | 0.782968 |
| Cpsf6    | 0.052506 | 0.584545 | 0.782968 |
| Atp5g2   | 0.114064 | 0.584559 | 0.782968 |
| Ralgps1  | 0.134272 | 0.58518  | 0.783449 |
| Foxred2  | 0.4097   | 0.585261 | 0.783488 |
| Olfm1    | 0.157507 | 0.585527 | 0.783634 |
| Gsdme    | 0.260011 | 0.585714 | 0.783814 |
| Ccz1     | 0.068503 | 0.585839 | 0.783866 |
| Gm15706  | 0.109313 | 0.585858 | 0.783866 |
| Clpp     | 0.063825 | 0.586909 | 0.784992 |
| Dcaf6    | 0.084435 | 0.587018 | 0.784998 |
| Gm5112   | 0.228766 | 0.587222 | 0.785002 |
| Cntrl    | 0.084564 | 0.587948 | 0.78566  |
| Atg101   | 0.06863  | 0.587986 | 0.78566  |
| Cdk5r2   | 0.121031 | 0.588092 | 0.785713 |
| Xk       | 0.267164 | 0.588131 | 0.785713 |
| Gm12996  | 0.422213 | 0.588854 | 0.78654  |
| Zfyve28  | 0.14694  | 0.588985 | 0.786644 |
| Casp7    | 0.093419 | 0.589092 | 0.786658 |
| Gm37780  | 0.242234 | 0.589536 | 0.787081 |
| Dck      | 0.172206 | 0.589623 | 0.787081 |
| Gm47320  | 0.248053 | 0.589639 | 0.787081 |
| Eml4     | 0.066951 | 0.58968  | 0.787081 |
| Gm16378  | 0.301347 | 0.58997  | 0.787242 |
| Mapk14   | 0.071444 | 0.590182 | 0.787242 |
| Numb1    | 0.154435 | 0.590286 | 0.787242 |
| Csf2ra   | 0.174495 | 0.590379 | 0.787242 |
| Efnb3    | 0.64473  | 0.590598 | 0.787464 |
| Tdrd9    | 0.74597  | 0.590827 | 0.787629 |
| Phkg2    | 0.100443 | 0.590826 | 0.787629 |

|          |          |          |          |
|----------|----------|----------|----------|
| Al429214 | 0.256961 | 0.591072 | 0.787815 |
| Gm43300  | 0.225386 | 0.591377 | 0.788082 |
| Frg2f1   | 0.247774 | 0.591497 | 0.788144 |
| Msl1     | 0.047565 | 0.591759 | 0.788208 |
| Coq9     | 0.112511 | 0.591829 | 0.788208 |
| Parl     | 0.07408  | 0.59184  | 0.788208 |
| Sall2    | 0.140803 | 0.592293 | 0.7886   |
| Atg4c    | 0.162943 | 0.592716 | 0.788845 |
| Cdk20    | 0.20282  | 0.592829 | 0.788868 |
| Mgst3    | 0.059362 | 0.592973 | 0.788904 |
| Arsk     | 0.123167 | 0.593299 | 0.789101 |
| Samd7    | 0.148295 | 0.593462 | 0.789101 |
| Gm45698  | 0.323131 | 0.593513 | 0.789101 |
| Tmem203  | 0.096216 | 0.593509 | 0.789101 |
| Gm40332  | 0.580332 | 0.593634 | 0.789122 |
| Spink10  | 0.246198 | 0.59369  | 0.789127 |
| Gm7265   | 0.210389 | 0.594249 | 0.78952  |
| Tlk2     | 0.062976 | 0.594245 | 0.78952  |
| Dhdh     | 0.115945 | 0.594699 | 0.789977 |
| Gm44321  | 0.259543 | 0.594773 | 0.790006 |
| Scfd2    | 0.227511 | 0.595091 | 0.790136 |
| Elmo2    | 0.074697 | 0.59515  | 0.790136 |
| Sec11a   | 0.053322 | 0.595151 | 0.790136 |
| Gan      | 0.110013 | 0.595164 | 0.790136 |
| Gna11    | 0.035607 | 0.595328 | 0.790199 |
| Ss18l1   | 0.209984 | 0.595394 | 0.790199 |
| Ogg1     | 0.178452 | 0.596199 | 0.790792 |
| Wwtr1    | 0.034526 | 0.596521 | 0.79104  |
| Gm16499- | 0.254834 | 0.59654  | 0.79104  |
| Lrrc47   | 0.090827 | 0.596909 | 0.79126  |
| Fyb      | 0.552805 | 0.597522 | 0.7919   |
| Pomgnt2  | 0.198981 | 0.597912 | 0.792149 |
| Pdia4    | 0.063023 | 0.597921 | 0.792149 |
| Gk5      | 0.129575 | 0.598069 | 0.792275 |
| Smyd3    | 0.105126 | 0.598196 | 0.792352 |
| Mrpl22   | 0.094465 | 0.598233 | 0.792352 |
| Scaf1    | 0.067301 | 0.598444 | 0.792491 |
| Inka2    | 0.129178 | 0.598542 | 0.792551 |
| Mypopos  | 0.212262 | 0.598885 | 0.792725 |
| Gm47155  | 0.510436 | 0.599172 | 0.792931 |
| Sidt2    | 0.074515 | 0.599622 | 0.793336 |
| Polg2    | 0.121553 | 0.599665 | 0.793336 |
| Eml5     | 0.099268 | 0.599751 | 0.79338  |
| Med10    | 0.059439 | 0.599973 | 0.793503 |
| Rhbdd1   | 0.102957 | 0.600003 | 0.793503 |
| Gm42937  | 0.36238  | 0.6001   | 0.793538 |
| Kansl3   | 0.056063 | 0.600258 | 0.79363  |

|            |          |          |          |
|------------|----------|----------|----------|
| Mapkapk2   | 0.079972 | 0.600356 | 0.793645 |
| Casp8ap2   | 0.066191 | 0.600376 | 0.793645 |
| Entpd7     | 0.139108 | 0.600538 | 0.793772 |
| Sgta       | 0.063799 | 0.600636 | 0.793772 |
| Gpr107     | 0.075114 | 0.60068  | 0.793772 |
| Fchsd1     | 0.243057 | 0.600683 | 0.793772 |
| Gnmt       | 0.549567 | 0.600796 | 0.79378  |
| Zer1       | 0.077011 | 0.600892 | 0.793837 |
| Tradd      | 0.133652 | 0.60121  | 0.794055 |
| Csgalnact1 | 0.080868 | 0.601216 | 0.794055 |
| Eif4e      | 0.057806 | 0.601449 | 0.794249 |
| Tmem69     | 0.27828  | 0.601575 | 0.794249 |
| Fbxl2      | 0.109627 | 0.601564 | 0.794249 |
| Gm45501    | 0.159407 | 0.601638 | 0.794262 |
| Hlx        | 0.095608 | 0.601801 | 0.794301 |
| 2610001A   | 0.526243 | 0.601839 | 0.794301 |
| Nubpl      | 0.125708 | 0.601925 | 0.794301 |
| U1-34      | 0.73373  | 0.602187 | 0.794496 |
| Aldh5a1    | 0.143354 | 0.602333 | 0.794597 |
| Tmem104    | 0.149659 | 0.60237  | 0.794597 |
| Fam174b    | 0.278414 | 0.602647 | 0.794823 |
| Cyb561a3   | 0.150273 | 0.602904 | 0.795024 |
| Acad9      | 0.102404 | 0.602906 | 0.795024 |
| Lym2       | 0.087412 | 0.603002 | 0.795081 |
| Zfp335     | 0.134971 | 0.603194 | 0.795081 |
| Gm37509    | 0.43219  | 0.603239 | 0.795081 |
| Uckl1os    | 0.169284 | 0.603313 | 0.795081 |
| Gm37090    | 0.264096 | 0.603374 | 0.795081 |
| Camkk1     | 0.21221  | 0.603574 | 0.79518  |
| Ddx49      | 0.107121 | 0.603609 | 0.79518  |
| Lrrc1      | 0.153936 | 0.603714 | 0.79518  |
| Rims1      | 0.302163 | 0.603936 | 0.795402 |
| Cdkn1a     | 0.033622 | 0.604279 | 0.795747 |
| Zfp512b    | 0.107069 | 0.604304 | 0.795747 |
| Fam216a    | 0.088162 | 0.604449 | 0.795867 |
| Ube2j1     | 0.078788 | 0.604829 | 0.795985 |
| Trnp1      | 0.192604 | 0.604894 | 0.795985 |
| 6330549D   | 0.426453 | 0.604938 | 0.795985 |
| Arhgap45   | 0.47176  | 0.604964 | 0.795985 |
| Crxos      | 0.297995 | 0.604962 | 0.795985 |
| Nck2       | 0.119513 | 0.605046 | 0.796023 |
| Rpp21      | 0.060745 | 0.605412 | 0.796366 |
| Zfp954     | 0.165923 | 0.605526 | 0.79639  |
| Gnaq       | 0.037782 | 0.605553 | 0.79639  |
| Gm7536     | 0.252597 | 0.60559  | 0.79639  |
| Mcm5       | 0.231076 | 0.606006 | 0.796673 |
| Ginm1      | 0.045966 | 0.606019 | 0.796673 |

|           |          |          |          |
|-----------|----------|----------|----------|
| Cops7b    | 0.118566 | 0.606165 | 0.796762 |
| Aim2      | 0.163197 | 0.606246 | 0.796762 |
| Gm15998   | 0.088151 | 0.606363 | 0.79677  |
| Usp6nl    | 0.061784 | 0.6064   | 0.79677  |
| Gm29237   | 0.240165 | 0.606724 | 0.797032 |
| Cdc26     | 0.049155 | 0.606771 | 0.797032 |
| Slc35d2   | 0.113098 | 0.606824 | 0.797032 |
| Gtpbp8    | 0.110672 | 0.606957 | 0.797068 |
| Asb7      | 0.109984 | 0.607136 | 0.79708  |
| Zfc3h1    | 0.06385  | 0.607139 | 0.79708  |
| Cdk17     | 0.047309 | 0.607192 | 0.79708  |
| Tbc1d17   | 0.073292 | 0.607424 | 0.797216 |
| Zfp729b   | 0.131529 | 0.607443 | 0.797216 |
| Tatdn3    | 0.156286 | 0.607581 | 0.797217 |
| Lrch3     | 0.056424 | 0.607604 | 0.797217 |
| Pnkp      | 0.090521 | 0.60797  | 0.797554 |
| Mef2a     | 0.033364 | 0.608124 | 0.797554 |
| Gm43863   | 0.317059 | 0.608919 | 0.798313 |
| N4bp2l2   | 0.039127 | 0.609356 | 0.798462 |
| Rhbdd3    | 0.147562 | 0.609409 | 0.798462 |
| Fam219a   | 0.090672 | 0.609565 | 0.798531 |
| Gm50455   | 0.25329  | 0.609906 | 0.798864 |
| Zpr1      | 0.085651 | 0.610362 | 0.799027 |
| Tle1      | 0.059174 | 0.610371 | 0.799027 |
| Diaph1    | 0.047625 | 0.610812 | 0.799434 |
| Bmerb1    | 0.614023 | 0.610871 | 0.799434 |
| Gm37738   | 0.345369 | 0.610867 | 0.799434 |
| Slc37a4   | 0.124764 | 0.610896 | 0.799434 |
| Bcdin3d   | 0.120977 | 0.611423 | 0.799845 |
| Mfsd4b4   | 0.351131 | 0.611514 | 0.799883 |
| Gopc      | 0.080569 | 0.611618 | 0.799883 |
| Npc1      | 0.082249 | 0.611786 | 0.799883 |
| Cenpf     | 0.776878 | 0.611852 | 0.799883 |
| Rpl9-ps6  | 0.100182 | 0.611887 | 0.799883 |
| Pphln1    | 0.088088 | 0.611914 | 0.799883 |
| A930004J1 | 0.087967 | 0.611967 | 0.799883 |
| Gm12987   | 0.277517 | 0.612113 | 0.799978 |
| Csrnp3    | 0.362273 | 0.612225 | 0.800042 |
| Aco1      | 0.093153 | 0.612502 | 0.800138 |
| Gm47322   | 0.472462 | 0.612744 | 0.800244 |
| Arsb      | 0.097377 | 0.613314 | 0.800778 |
| Gsg1      | 0.524453 | 0.613366 | 0.800778 |
| Gm16982   | 0.524205 | 0.614099 | 0.801455 |
| Kremen1   | 0.084226 | 0.614157 | 0.801459 |
| Gm2027    | 0.560399 | 0.614294 | 0.801461 |
| Ahcyl1    | 0.038895 | 0.614318 | 0.801461 |
| Dnajc30   | 0.079838 | 0.615013 | 0.802062 |



|          |          |          |          |
|----------|----------|----------|----------|
| Gm43305  | 0.208244 | 0.615098 | 0.802062 |
| Zswim5   | 0.270141 | 0.615229 | 0.802103 |
| Cd3eap   | 0.103605 | 0.615238 | 0.802103 |
| Rabgap1  | 0.055377 | 0.615398 | 0.802171 |
| Atcay    | 0.558676 | 0.615564 | 0.802284 |
| Gins2    | 0.205912 | 0.615933 | 0.802515 |
| Gm47113  | 0.485922 | 0.61606  | 0.802515 |
| Rdh10    | 0.123848 | 0.616144 | 0.802515 |
| Arhgap28 | 0.216799 | 0.616364 | 0.802732 |
| Pcx      | 0.170642 | 0.616538 | 0.80285  |
| Uqcc1    | 0.097325 | 0.616572 | 0.80285  |
| Zfp160   | 0.098962 | 0.616623 | 0.80285  |
| Maml2    | 0.061251 | 0.616669 | 0.80285  |
| Ccdc112  | 0.11401  | 0.617164 | 0.803284 |
| Xpo6     | 0.079037 | 0.617561 | 0.803729 |
| Hr       | 0.28029  | 0.618633 | 0.804846 |
| Gm20522  | 0.361168 | 0.618801 | 0.804857 |
| Gm50008  | 0.077608 | 0.618802 | 0.804857 |
| Mmab     | 0.186361 | 0.619126 | 0.805051 |
| 6720475M | 0.347589 | 0.61922  | 0.805051 |
| 4732414G | 0.376496 | 0.619302 | 0.805087 |
| Txlng    | 0.093069 | 0.619362 | 0.805096 |
| Tmem181  | 0.095493 | 0.620244 | 0.805899 |
| Ppp1r1b  | 0.225793 | 0.620303 | 0.805899 |
| Serpini1 | 0.077333 | 0.620431 | 0.805986 |
| Prkag2   | 0.122011 | 0.620524 | 0.805986 |
| Pgrmc1   | 0.038484 | 0.620765 | 0.80614  |
| Cbr1     | 0.065385 | 0.621001 | 0.80614  |
| Gm37124  | 0.198615 | 0.621081 | 0.80614  |
| Senp3    | 0.076072 | 0.621599 | 0.806305 |
| Cope     | 0.043571 | 0.621969 | 0.806584 |
| Hyal3    | 0.328146 | 0.622016 | 0.806584 |
| Fbll1    | 1.002796 | 0.623106 | 0.807718 |
| Gm10177  | 0.149192 | 0.623514 | 0.808037 |
| Pdk3     | 0.132641 | 0.623726 | 0.808172 |
| Stau1    | 0.058711 | 0.624138 | 0.808251 |
| Ngb      | 0.390043 | 0.624135 | 0.808251 |
| Gm5436   | 0.462665 | 0.624168 | 0.808251 |
| 4930403P | 0.332647 | 0.624769 | 0.808683 |
| Gm25517  | 0.765586 | 0.624876 | 0.808731 |
| Trappc2  | 0.079079 | 0.625262 | 0.808902 |
| Fabp12   | 0.083053 | 0.625621 | 0.809108 |
| Gm48904  | 0.549316 | 0.625691 | 0.809108 |
| Gm7180   | 0.18542  | 0.625872 | 0.809272 |
| Slc45a4  | 0.144284 | 0.626301 | 0.809638 |
| Lpar6    | 0.05515  | 0.626365 | 0.809638 |
| Gm5617   | 0.092714 | 0.626375 | 0.809638 |

|           |          |          |          |
|-----------|----------|----------|----------|
| Odf2l     | 0.104244 | 0.626562 | 0.809675 |
| Gm9856    | 0.124871 | 0.627017 | 0.810052 |
| Wwc1      | 0.43704  | 0.627527 | 0.810541 |
| Rragb     | 0.329089 | 0.627557 | 0.810541 |
| Cdc42bpg  | 0.163313 | 0.627629 | 0.810563 |
| Mat2b     | 0.044516 | 0.627727 | 0.81062  |
| Rnf217    | 0.101876 | 0.628289 | 0.810966 |
| Yipf1     | 0.059008 | 0.62832  | 0.810966 |
| Rcbtb2    | 0.086998 | 0.628637 | 0.811198 |
| Fbxw17    | 0.142039 | 0.628996 | 0.811312 |
| Uppt      | 0.396894 | 0.629027 | 0.811312 |
| Taf5l     | 0.093224 | 0.629158 | 0.811312 |
| Spin1     | 0.051236 | 0.62921  | 0.811312 |
| Gm9929    | 0.653743 | 0.629401 | 0.811312 |
| Med18     | 0.146772 | 0.629587 | 0.811346 |
| Gemin6    | 0.168105 | 0.62992  | 0.81149  |
| Gm19967   | 0.254959 | 0.629973 | 0.81149  |
| B3galnt2  | 0.101361 | 0.629973 | 0.81149  |
| Gm45251   | 0.210024 | 0.630066 | 0.811541 |
| Ptrhd1    | 0.083756 | 0.631052 | 0.81248  |
| Mif-ps4   | 0.317712 | 0.631308 | 0.812651 |
| Gm28557   | 0.26105  | 0.631575 | 0.812924 |
| Dek       | 0.031221 | 0.631734 | 0.812989 |
| Unc5a     | 0.365909 | 0.631949 | 0.813196 |
| Brca2     | 0.130981 | 0.632312 | 0.813524 |
| Slc35b3   | 0.085456 | 0.632425 | 0.8136   |
| Gm45719   | 0.342653 | 0.632793 | 0.813819 |
| Strap     | 0.046385 | 0.632939 | 0.813841 |
| Ddx25     | 0.532315 | 0.633282 | 0.814072 |
| Kdm6b     | 0.049387 | 0.633609 | 0.814423 |
| Calb2     | 0.363001 | 0.634236 | 0.815046 |
| Ciao2a    | 0.062973 | 0.634258 | 0.815046 |
| Grcc10    | 0.063562 | 0.634354 | 0.815095 |
| Dgka      | 0.085673 | 0.634472 | 0.815095 |
| Mthfsl    | 0.099633 | 0.634481 | 0.815095 |
| Orai3     | 0.083644 | 0.634568 | 0.815095 |
| Sgsh      | 0.150858 | 0.634714 | 0.815214 |
| Acot8     | 0.095997 | 0.63492  | 0.815249 |
| Catspere2 | 0.515333 | 0.63496  | 0.815249 |
| Snrpa1    | 0.061956 | 0.635072 | 0.815323 |
| Tpd52     | 0.028689 | 0.635409 | 0.815686 |
| Zfp58     | 0.170555 | 0.635654 | 0.81586  |
| Cnnm3     | 0.080822 | 0.635751 | 0.815915 |
| Zbtb21    | 0.100531 | 0.636057 | 0.816097 |
| Vegfd     | 0.152189 | 0.636343 | 0.816097 |
| Lekr1     | 0.178366 | 0.636568 | 0.816097 |
| Gm44045   | 0.195709 | 0.636583 | 0.816097 |

|          |          |          |          |
|----------|----------|----------|----------|
| Lonp1    | 0.076445 | 0.636595 | 0.816097 |
| Sort1    | 0.054914 | 0.636681 | 0.816097 |
| Sec23b   | 0.071932 | 0.636723 | 0.816097 |
| Nudcd2   | 0.073598 | 0.636834 | 0.816097 |
| Derl1    | 0.054348 | 0.636928 | 0.816097 |
| Rabep1   | 0.049646 | 0.63751  | 0.816772 |
| Gm37524  | 0.269345 | 0.63819  | 0.817503 |
| Scrn1    | 0.177841 | 0.638689 | 0.818002 |
| Snx9     | 0.061962 | 0.639075 | 0.818114 |
| E430021H | 0.120836 | 0.639145 | 0.818114 |
| Slc9a7   | 0.393622 | 0.639165 | 0.818114 |
| 2310033P | 0.070757 | 0.639213 | 0.818114 |
| Map2k4   | 0.06884  | 0.639471 | 0.818235 |
| Ngf      | 0.135595 | 0.639798 | 0.818512 |
| Stx19    | 0.33976  | 0.640023 | 0.818591 |
| Gm44270  | 0.201671 | 0.640276 | 0.818801 |
| Asb3     | 0.103992 | 0.640462 | 0.818943 |
| Bcl7b    | 0.049918 | 0.64063  | 0.818963 |
| 4930465K | 0.977265 | 0.640697 | 0.818963 |
| Spcs3    | 0.063094 | 0.640681 | 0.818963 |
| Plk1     | 0.717494 | 0.640778 | 0.818997 |
| Pigz     | 0.286282 | 0.641637 | 0.819955 |
| Rac3     | 0.263199 | 0.641699 | 0.819964 |
| Gm37900  | 0.253684 | 0.641793 | 0.819978 |
| Pdap1    | 0.035843 | 0.64182  | 0.819978 |
| Zfp395   | 0.072562 | 0.6426   | 0.820684 |
| Pcdh17   | 0.052254 | 0.642955 | 0.820942 |
| P3h1     | 0.121318 | 0.643046 | 0.820955 |
| Pdlim7   | 0.06328  | 0.643176 | 0.82101  |
| Gm37702  | 0.715697 | 0.643496 | 0.821279 |
| Ccng2    | 0.07065  | 0.643663 | 0.821351 |
| Platr25  | 0.130992 | 0.644649 | 0.822255 |
| Tefm     | 0.149779 | 0.644728 | 0.822255 |
| Csnk1e   | 0.04018  | 0.644755 | 0.822255 |
| Tbc1d12  | 0.054639 | 0.644981 | 0.822473 |
| Pck2     | 0.071498 | 0.645195 | 0.822676 |
| B430203G | 0.351452 | 0.645455 | 0.822933 |
| Rpl32l   | 0.303556 | 0.645506 | 0.822933 |
| Golph3   | 0.050621 | 0.645825 | 0.823193 |
| Gna14    | 0.331204 | 0.645948 | 0.823216 |
| Ebpl     | 0.04399  | 0.646543 | 0.823683 |
| Spen     | 0.040443 | 0.646551 | 0.823683 |
| Gm42697  | 0.673096 | 0.646909 | 0.823949 |
| Ptptra   | 0.037993 | 0.647101 | 0.824122 |
| Pdk1     | 0.090198 | 0.647273 | 0.824132 |
| Pygo2    | 0.082784 | 0.647444 | 0.82428  |
| Hbs1l    | 0.070595 | 0.647538 | 0.82433  |

|           |          |          |          |
|-----------|----------|----------|----------|
| Pcyox1    | 0.061633 | 0.647986 | 0.824689 |
| Dyrk3     | 0.499566 | 0.648166 | 0.824848 |
| Rxrg      | 0.691807 | 0.649    | 0.825417 |
| Gm43289   | 0.492508 | 0.649109 | 0.825417 |
| Gm43294   | 0.437202 | 0.649582 | 0.825946 |
| Hacd1     | 0.146328 | 0.649636 | 0.825946 |
| Vsir      | 0.05849  | 0.649819 | 0.82599  |
| Gm49449   | 0.653144 | 0.649835 | 0.82599  |
| Col4a4    | 0.090616 | 0.649947 | 0.826062 |
| Fam135b   | 0.409554 | 0.651084 | 0.8271   |
| Zswim7    | 0.114695 | 0.651142 | 0.8271   |
| Col23a1   | 0.144293 | 0.651184 | 0.8271   |
| Ap3m1     | 0.057684 | 0.651229 | 0.8271   |
| Zfp369    | 0.126368 | 0.651261 | 0.8271   |
| Ubxn2b    | 0.104377 | 0.651557 | 0.827335 |
| Fam171a1  | 0.055705 | 0.651863 | 0.827544 |
| Zgpat     | 0.115576 | 0.652097 | 0.82767  |
| Smim31    | 0.928748 | 0.652326 | 0.827794 |
| Vta1      | 0.057457 | 0.652439 | 0.827794 |
| Armcx3    | 0.058578 | 0.65253  | 0.827794 |
| Gm19236   | 0.932136 | 0.652576 | 0.827794 |
| Zfp790    | 0.127314 | 0.652581 | 0.827794 |
| C230062I1 | 0.24672  | 0.65268  | 0.827849 |
| 1700124L1 | 0.414245 | 0.652991 | 0.828033 |
| Rsad1     | 0.15499  | 0.65299  | 0.828033 |
| Mrps11    | 0.072771 | 0.653808 | 0.828788 |
| Gm47503   | 0.417981 | 0.654194 | 0.829207 |
| Cog1      | 0.090804 | 0.654311 | 0.829285 |
| Gm44152   | 0.192152 | 0.654507 | 0.829342 |
| B4galt3   | 0.084501 | 0.654748 | 0.829418 |
| Gm38066   | 0.117576 | 0.654902 | 0.82944  |
| Cherp     | 0.068014 | 0.655024 | 0.829453 |
| Cab39     | 0.038683 | 0.655153 | 0.829509 |
| Wdcp      | 0.091918 | 0.655286 | 0.829538 |
| Pole3     | 0.064023 | 0.655341 | 0.829538 |
| Prr14l    | 0.100875 | 0.655546 | 0.829671 |
| 9130221H  | 0.136616 | 0.655557 | 0.829671 |
| Mbtps1    | 0.053448 | 0.655649 | 0.829674 |
| Gm26533   | 0.364781 | 0.655749 | 0.829674 |
| Gm9996    | 0.891137 | 0.655767 | 0.829674 |
| Zmym5     | 0.041859 | 0.655814 | 0.829674 |
| Gm15261   | 0.161484 | 0.655992 | 0.829674 |
| Mtres1    | 0.080494 | 0.656007 | 0.829674 |
| Aip       | 0.048376 | 0.656075 | 0.829674 |
| Xrcc1     | 0.081505 | 0.656114 | 0.829674 |
| Lmln      | 0.165215 | 0.656544 | 0.829937 |
| Ccdc189   | 0.249791 | 0.656868 | 0.830192 |

|           |          |          |          |
|-----------|----------|----------|----------|
| Fam110a   | 0.072044 | 0.656973 | 0.830192 |
| 4833428L1 | 0.617434 | 0.657412 | 0.830296 |
| Opa3      | 0.076857 | 0.657546 | 0.830296 |
| Psmb4     | 0.030023 | 0.657576 | 0.830296 |
| Nrip1     | 0.039214 | 0.657604 | 0.830296 |
| Gm18829   | 0.209937 | 0.657845 | 0.830452 |
| Sigmar1   | 0.082184 | 0.657936 | 0.830452 |
| Gnasas1   | 0.883395 | 0.658416 | 0.830901 |
| Dalrd3    | 0.074258 | 0.658645 | 0.831049 |
| Usp11     | 0.139736 | 0.658895 | 0.831225 |
| Coq8a     | 0.20646  | 0.659043 | 0.831264 |
| Zfp800    | 0.054766 | 0.659093 | 0.831264 |
| Kcnh7     | 0.719721 | 0.659647 | 0.831665 |
| Kirrel    | 0.085534 | 0.65994  | 0.831785 |
| Ciao1     | 0.064913 | 0.660131 | 0.831834 |
| Mttp      | 0.155764 | 0.660561 | 0.832124 |
| S100b     | 0.160467 | 0.660701 | 0.832124 |
| Gm3435    | 0.284068 | 0.660817 | 0.832177 |
| Fam160a2  | 0.083896 | 0.661217 | 0.832611 |
| Ccdc184   | 0.099915 | 0.661507 | 0.832835 |
| Gm42946   | 0.266965 | 0.661827 | 0.833098 |
| Cobl      | 0.19728  | 0.662007 | 0.833146 |
| Mapk1ip1l | 0.050139 | 0.662294 | 0.833272 |
| Plcb3     | 0.069111 | 0.66241  | 0.833272 |
| Aph1c     | 0.317199 | 0.663142 | 0.833702 |
| Gm17251   | 0.158976 | 0.663645 | 0.833844 |
| Fbxl4     | 0.104406 | 0.663882 | 0.834072 |
| Gm43361   | 0.131407 | 0.664315 | 0.834476 |
| Hdac1     | 0.042874 | 0.664731 | 0.834719 |
| Zfp960    | 0.235678 | 0.665224 | 0.835094 |
| Cep44     | 0.093583 | 0.665386 | 0.835121 |
| Gm15760   | 0.266556 | 0.665906 | 0.835524 |
| Strn4     | 0.054573 | 0.665926 | 0.835524 |
| Azi2      | 0.043944 | 0.666034 | 0.835584 |
| Gm48334   | 0.22708  | 0.666108 | 0.835607 |
| Dtnb      | 0.110531 | 0.666464 | 0.835857 |
| Folh1     | 0.245018 | 0.666475 | 0.835857 |
| Elovl2    | 0.122841 | 0.666787 | 0.836099 |
| Gm42829   | 0.233415 | 0.667033 | 0.836099 |
| Nudt19    | 0.088204 | 0.667046 | 0.836099 |
| Gm38297   | 0.278356 | 0.667585 | 0.836553 |
| Nprl3     | 0.099788 | 0.667592 | 0.836553 |
| Trp53i13  | 0.079288 | 0.667949 | 0.836864 |
| Kcnn1     | 0.665411 | 0.668329 | 0.837182 |
| Ambra1    | 0.080071 | 0.668318 | 0.837182 |
| Lrrc61    | 0.145181 | 0.668684 | 0.837182 |
| Alpk2     | 0.508037 | 0.668706 | 0.837182 |

|           |          |          |          |
|-----------|----------|----------|----------|
| Al987944  | 0.085159 | 0.669219 | 0.837615 |
| Slco5a1   | 0.312117 | 0.669574 | 0.837989 |
| Abhd17b   | 0.062925 | 0.669921 | 0.83811  |
| Kdm2b     | 0.087161 | 0.670424 | 0.838556 |
| 1700018LC | 0.187175 | 0.67073  | 0.838704 |
| Fer       | 0.068797 | 0.670762 | 0.838704 |
| Nsfl1c    | 0.048531 | 0.67129  | 0.83911  |
| 2310010J1 | 0.079287 | 0.671434 | 0.83911  |
| Snx25     | 0.095267 | 0.671472 | 0.83911  |
| Gm48236   | 0.388698 | 0.671651 | 0.839171 |
| Rab35     | 0.054003 | 0.67168  | 0.839171 |
| 4930563E  | 0.182644 | 0.671861 | 0.839287 |
| Ube2g2    | 0.061275 | 0.672098 | 0.839295 |
| D630030B  | 0.199962 | 0.672156 | 0.839295 |
| Porcn     | 0.098181 | 0.672208 | 0.839295 |
| Tbce      | 0.080024 | 0.672243 | 0.839295 |
| Zfp973    | 0.252589 | 0.672694 | 0.839664 |
| Ddx52     | 0.06379  | 0.672793 | 0.839664 |
| Ip6k3     | 0.241168 | 0.672968 | 0.83978  |
| Slc9a2    | 0.13844  | 0.673041 | 0.8398   |
| Gm26549   | 0.276039 | 0.673297 | 0.839953 |
| Rab29     | 0.115364 | 0.673372 | 0.839953 |
| Fn3k      | 0.155772 | 0.673461 | 0.839953 |
| Pemt      | 0.298263 | 0.673614 | 0.839953 |
| Scd1      | 0.332526 | 0.673653 | 0.839953 |
| 2010001A  | 0.101977 | 0.673668 | 0.839953 |
| 2310061I0 | 0.078895 | 0.674062 | 0.840095 |
| Pak4      | 0.077951 | 0.674525 | 0.840473 |
| Gm37211   | 0.620471 | 0.674587 | 0.840473 |
| Rab11fip5 | 0.057133 | 0.674759 | 0.840473 |
| Gm19710   | 0.558209 | 0.674945 | 0.840635 |
| Ptprz1    | 0.248027 | 0.675151 | 0.840752 |
| Smarcd3   | 0.110276 | 0.675536 | 0.840952 |
| Tyms      | 0.109444 | 0.676166 | 0.841228 |
| 5730507A  | 0.217619 | 0.676264 | 0.841228 |
| Gm5628    | 0.384572 | 0.676368 | 0.841288 |
| Nmbr      | 0.834958 | 0.676552 | 0.841446 |
| Dr1       | 0.066384 | 0.676856 | 0.841615 |
| Rexo2     | 0.036461 | 0.677347 | 0.841876 |
| Akt1      | 0.039617 | 0.677651 | 0.841967 |
| 3110021N  | 0.144868 | 0.677725 | 0.841967 |
| Katnbl1   | 0.056507 | 0.677733 | 0.841967 |
| Bsn       | 0.21768  | 0.678191 | 0.842296 |
| Ppm1b     | 0.047375 | 0.678294 | 0.842325 |
| C2cd2     | 0.055711 | 0.678521 | 0.842403 |
| Nr2c2     | 0.047961 | 0.678559 | 0.842403 |
| Mastl     | 0.25794  | 0.678623 | 0.842413 |

|          |          |          |          |
|----------|----------|----------|----------|
| Cfap298  | 0.068314 | 0.678853 | 0.842629 |
| Noc3l    | 0.101013 | 0.679299 | 0.843042 |
| Tspan6   | 0.082557 | 0.67956  | 0.843158 |
| Adat1    | 0.135822 | 0.679561 | 0.843158 |
| Comtd1   | 0.088306 | 0.679641 | 0.843187 |
| Scaf4    | 0.061845 | 0.679836 | 0.843342 |
| Gm48986  | 0.479388 | 0.679879 | 0.843342 |
| Tigd5    | 0.171212 | 0.680232 | 0.843597 |
| Nr2c1    | 0.101401 | 0.680253 | 0.843597 |
| Syt10    | 0.52635  | 0.6804   | 0.843709 |
| Mrfap1   | 0.025588 | 0.68065  | 0.843913 |
| Dnase2a  | 0.100807 | 0.6807   | 0.843913 |
| Gm17231  | 0.204155 | 0.681684 | 0.844742 |
| Tmem147  | 0.323759 | 0.68185  | 0.844857 |
| Ggct     | 0.10947  | 0.68189  | 0.844857 |
| Dock5    | 0.134378 | 0.682466 | 0.845361 |
| Dok6     | 0.781597 | 0.682827 | 0.845503 |
| Star     | 0.251334 | 0.68292  | 0.845503 |
| Gm47583  | 0.23528  | 0.683014 | 0.845503 |
| Nphs1    | 0.613167 | 0.683209 | 0.845651 |
| Sh3rf1   | 0.06412  | 0.683356 | 0.845763 |
| Gm2531   | 0.147226 | 0.683526 | 0.845765 |
| Gm43081  | 0.421985 | 0.683658 | 0.845788 |
| Pcgf6    | 0.112194 | 0.683885 | 0.846    |
| Glg1     | 0.032027 | 0.684009 | 0.846083 |
| Ficd     | 0.10595  | 0.684231 | 0.846185 |
| Zfp821   | 0.079396 | 0.684261 | 0.846185 |
| 5930411N | 0.521585 | 0.684578 | 0.846437 |
| Gm37289  | 0.268047 | 0.685586 | 0.846954 |
| Timm23   | 0.044142 | 0.685649 | 0.846954 |
| Kif26a   | 0.035176 | 0.685675 | 0.846954 |
| Zc3h7a   | 0.039327 | 0.685853 | 0.847034 |
| Ctnna2   | 0.791534 | 0.686494 | 0.847475 |
| Nob1     | 0.087319 | 0.686573 | 0.847503 |
| Slc44a1  | 0.036444 | 0.686631 | 0.847505 |
| Osgepl1  | 0.085594 | 0.686839 | 0.847692 |
| Mpc1     | 0.035266 | 0.687054 | 0.847888 |
| Gm8251   | 0.323704 | 0.687303 | 0.848065 |
| Bex1     | 0.16611  | 0.687547 | 0.848217 |
| Gm42672  | 0.472457 | 0.687936 | 0.848387 |
| Cdh4     | 0.123683 | 0.688232 | 0.848498 |
| Smyd4    | 0.112604 | 0.688329 | 0.848498 |
| Cnn2     | 0.033058 | 0.688764 | 0.848709 |
| Cntnap1  | 0.197763 | 0.688802 | 0.848709 |
| Gm37914  | 0.216717 | 0.688926 | 0.848709 |
| Zfp938   | 0.08282  | 0.689123 | 0.848762 |
| Thoc3    | 0.059314 | 0.689313 | 0.848927 |

|          |          |          |          |
|----------|----------|----------|----------|
| Ramac    | 0.041077 | 0.689375 | 0.848932 |
| Micu1    | 0.06513  | 0.689645 | 0.849055 |
| Ebf2     | 0.106503 | 0.689959 | 0.849224 |
| Frat1    | 0.227496 | 0.690022 | 0.849224 |
| Nt5dc2   | 0.061446 | 0.690574 | 0.84978  |
| Gcnt1    | 0.090473 | 0.690651 | 0.849805 |
| Thyn1    | 0.07768  | 0.691071 | 0.850106 |
| Aars2    | 0.12405  | 0.691124 | 0.850106 |
| Naif1    | 0.155577 | 0.691521 | 0.850316 |
| Mfng     | 0.046216 | 0.691696 | 0.850438 |
| Odr4     | 0.051879 | 0.692315 | 0.850897 |
| Gm37314  | 0.306714 | 0.692344 | 0.850897 |
| Rap1gap2 | 0.322082 | 0.692417 | 0.850897 |
| Map2k1   | 0.058204 | 0.692448 | 0.850897 |
| Spry2    | 0.068518 | 0.692884 | 0.851294 |
| Gm48128  | 0.424225 | 0.693061 | 0.851394 |
| Med15    | 0.04981  | 0.693137 | 0.851394 |
| Gm27239  | 0.838325 | 0.693542 | 0.851822 |
| B3gat2   | 0.154954 | 0.693854 | 0.852039 |
| Apbb3    | 0.114156 | 0.694018 | 0.852046 |
| Klhl12   | 0.072446 | 0.694341 | 0.852046 |
| B230312C | 0.578073 | 0.69435  | 0.852046 |
| Phyh     | 0.053867 | 0.694745 | 0.852263 |
| Osbpl11  | 0.066018 | 0.694887 | 0.852285 |
| Atg4d    | 0.07585  | 0.695338 | 0.852699 |
| 6430550D | 0.350624 | 0.695463 | 0.852783 |
| Rai2     | 0.175378 | 0.69621  | 0.853374 |
| Zfp229   | 0.100093 | 0.696311 | 0.853374 |
| Gm47826  | 0.21275  | 0.696329 | 0.853374 |
| Ift52    | 0.072435 | 0.696345 | 0.853374 |
| Rrn3     | 0.071259 | 0.696502 | 0.85348  |
| Slc25a14 | 0.114817 | 0.696674 | 0.85348  |
| Mrnip    | 0.143788 | 0.696816 | 0.853532 |
| Tmem116  | 0.359414 | 0.697274 | 0.853773 |
| Gm15421  | 0.303746 | 0.697304 | 0.853773 |
| Sco2     | 0.08566  | 0.697355 | 0.853773 |
| Rassf7   | 0.17204  | 0.697449 | 0.853777 |
| Snhg10   | 0.159998 | 0.697472 | 0.853777 |
| Sebox    | 0.160871 | 0.69773  | 0.853954 |
| 9930017N | 0.085184 | 0.697802 | 0.853972 |
| Borcs5   | 0.099263 | 0.698283 | 0.854328 |
| Xpo4     | 0.054039 | 0.698489 | 0.854328 |
| Gca      | 0.132662 | 0.698545 | 0.854328 |
| Dscam    | 0.509385 | 0.698549 | 0.854328 |
| Cox6c    | 0.018508 | 0.698614 | 0.854337 |
| Ssna1    | 0.04364  | 0.699074 | 0.85462  |
| Gm37447  | 0.223427 | 0.699168 | 0.854665 |



|          |          |          |          |
|----------|----------|----------|----------|
| Ogdh     | 0.033384 | 0.699436 | 0.854784 |
| Arhgef4  | 0.282747 | 0.699668 | 0.854928 |
| Gm44090  | 0.333252 | 0.70014  | 0.855341 |
| Klhl42   | 0.07853  | 0.700194 | 0.855341 |
| Arhgef5  | 0.051338 | 0.700463 | 0.85555  |
| Chd7     | 0.043324 | 0.700758 | 0.85577  |
| Tmem167  | 0.035825 | 0.701093 | 0.85611  |
| Pqbp1    | 0.049179 | 0.701807 | 0.856876 |
| Slc25a22 | 0.080557 | 0.701835 | 0.856876 |
| Lrrc23   | 0.320349 | 0.702367 | 0.857246 |
| Usf2     | 0.032585 | 0.702491 | 0.857313 |
| Asic4    | 0.267575 | 0.702996 | 0.857599 |
| Mlycd    | 0.060578 | 0.703115 | 0.857599 |
| Glis2    | 0.060561 | 0.703192 | 0.857599 |
| Ptbp2    | 0.053398 | 0.703274 | 0.857599 |
| Nap1l4   | 0.031798 | 0.703337 | 0.857599 |
| Gm43984  | 0.144515 | 0.703363 | 0.857599 |
| Ypel4    | 0.320556 | 0.703388 | 0.857599 |
| Zswim6   | 0.05685  | 0.703401 | 0.857599 |
| Gm43267  | 0.303051 | 0.703508 | 0.857615 |
| Ggnbp2   | 0.032431 | 0.703528 | 0.857615 |
| lqgap1   | 0.019812 | 0.703815 | 0.857894 |
| Ppcdc    | 0.098791 | 0.704025 | 0.858045 |
| Pim2     | 0.188878 | 0.704494 | 0.858162 |
| Ung      | 0.173776 | 0.704492 | 0.858162 |
| Mpeg1    | 0.442375 | 0.704909 | 0.858249 |
| Cxxc1    | 0.051103 | 0.705426 | 0.858599 |
| Tspan33  | 0.219762 | 0.705617 | 0.858693 |
| Tmem242  | 0.062723 | 0.70675  | 0.859437 |
| Rnf7     | 0.02619  | 0.706871 | 0.859437 |
| Maip1    | 0.065286 | 0.707366 | 0.859703 |
| Brsk2    | 0.114395 | 0.707852 | 0.860004 |
| Dhx34    | 0.137091 | 0.707891 | 0.860004 |
| Zfp518b  | 0.106926 | 0.708166 | 0.860186 |
| Phykpl   | 0.071856 | 0.708356 | 0.860277 |
| Gm13394  | 0.247307 | 0.708665 | 0.86046  |
| Zswim3   | 0.182979 | 0.708887 | 0.860486 |
| C130073E | 0.401894 | 0.709091 | 0.860486 |
| Zbtb40   | 0.113956 | 0.70912  | 0.860486 |
| Gm16754  | 0.191742 | 0.709223 | 0.860494 |
| Gm30531  | 0.211742 | 0.709329 | 0.860552 |
| Lhx4     | 0.370047 | 0.709401 | 0.860569 |
| Zfp609   | 0.05265  | 0.709491 | 0.860577 |
| Serac1   | 0.26231  | 0.709522 | 0.860577 |
| Pwwp2b   | 0.054329 | 0.709696 | 0.860698 |
| Sez6     | 0.187084 | 0.709806 | 0.860698 |
| Nudt3    | 0.040638 | 0.709998 | 0.860698 |

|          |          |          |          |
|----------|----------|----------|----------|
| Hs1bp3   | 0.093396 | 0.710024 | 0.860698 |
| Calu     | 0.030452 | 0.710024 | 0.860698 |
| Morc4    | 0.149794 | 0.710149 | 0.860744 |
| Rhobtb3  | 0.073082 | 0.710577 | 0.860904 |
| Ppp1r7   | 0.044111 | 0.710687 | 0.860904 |
| 9130604C | 0.222208 | 0.710711 | 0.860904 |
| Polr2d   | 0.063305 | 0.710709 | 0.860904 |
| Gm8373   | 0.4348   | 0.710893 | 0.861054 |
| Tfe3     | 0.061628 | 0.710986 | 0.861097 |
| Chst7    | 0.099952 | 0.711307 | 0.861322 |
| Gm8624   | 0.092013 | 0.711358 | 0.861322 |
| Tmem131  | 0.040439 | 0.711721 | 0.861569 |
| Gm42659  | 0.122171 | 0.712051 | 0.861899 |
| Hfm1     | 0.5272   | 0.7125   | 0.862302 |
| Ccdc138  | 0.142186 | 0.712871 | 0.862682 |
| Anapc1   | 0.041955 | 0.712948 | 0.862706 |
| Zdhhc9   | 0.061046 | 0.713299 | 0.862841 |
| Sfswap   | 0.040728 | 0.713397 | 0.862841 |
| Echdc1   | 0.079403 | 0.713406 | 0.862841 |
| Smarcd1  | 0.045049 | 0.713839 | 0.863135 |
| Gm47324  | 0.211482 | 0.713919 | 0.863135 |
| Asph     | 0.050203 | 0.714389 | 0.863135 |
| Gm27200  | 0.69421  | 0.714409 | 0.863135 |
| Gm45534  | 0.200567 | 0.714456 | 0.863135 |
| Stard3   | 0.068993 | 0.715528 | 0.864147 |
| Prdm4    | 0.082053 | 0.715582 | 0.864147 |
| Cops6    | 0.036639 | 0.71589  | 0.86431  |
| Mob3a    | 0.087402 | 0.716253 | 0.864609 |
| Zfp783   | 0.153818 | 0.716536 | 0.864741 |
| Gm47689  | 0.225832 | 0.716636 | 0.864778 |
| Trappc5  | 0.045113 | 0.716877 | 0.864934 |
| Scarf1   | 0.041011 | 0.716985 | 0.864934 |
| Zfp84    | 0.067932 | 0.717084 | 0.864984 |
| Eml3     | 0.054123 | 0.717176 | 0.865025 |
| Gm4045   | 0.198049 | 0.717371 | 0.865153 |
| Gtf2h4   | 0.088831 | 0.717471 | 0.865153 |
| Gm37776  | 0.679068 | 0.717499 | 0.865153 |
| Frmpd2   | 0.093324 | 0.717607 | 0.865153 |
| Dync2i1  | 0.076237 | 0.71801  | 0.865544 |
| Rnf24    | 0.135709 | 0.718175 | 0.86555  |
| Gm43263  | 0.715578 | 0.718189 | 0.86555  |
| Afg3l2   | 0.068071 | 0.718311 | 0.865603 |
| Gm6030   | 0.411436 | 0.718788 | 0.865839 |
| Kif18a   | 0.15796  | 0.718848 | 0.865839 |
| Rasgef1b | 0.15511  | 0.718891 | 0.865839 |
| Brf2     | 0.085146 | 0.718989 | 0.865886 |
| Slc12a5  | 0.065093 | 0.719346 | 0.865968 |

|          |          |          |          |
|----------|----------|----------|----------|
| 7SK-110  | 0.348161 | 0.719489 | 0.866006 |
| 2010315B | 0.062669 | 0.719493 | 0.866006 |
| Tmem63a  | 0.067978 | 0.719754 | 0.866088 |
| Tdg      | 0.063704 | 0.720196 | 0.866088 |
| Bloc1s5  | 0.073422 | 0.720258 | 0.866088 |
| Pym1     | 0.080282 | 0.720281 | 0.866088 |
| Psme3    | 0.059968 | 0.720313 | 0.866088 |
| Zbtb44   | 0.044321 | 0.7204   | 0.866123 |
| H3c7     | 0.391356 | 0.7209   | 0.866396 |
| Zfp212   | 0.063472 | 0.720903 | 0.866396 |
| F420014N | 0.281211 | 0.720906 | 0.866396 |
| Gm10933  | 0.258243 | 0.72092  | 0.866396 |
| Tmem74   | 0.687806 | 0.720993 | 0.866396 |
| Fbxo11   | 0.03405  | 0.721255 | 0.866455 |
| Rarb     | 0.176805 | 0.721464 | 0.866565 |
| 2610012C | 0.154678 | 0.721456 | 0.866565 |
| Gch1     | 0.038279 | 0.721521 | 0.866565 |
| Apool    | 0.066524 | 0.721624 | 0.86662  |
| Twink    | 0.105465 | 0.721815 | 0.86678  |
| F8a      | 0.081731 | 0.722207 | 0.867181 |
| Ccdc136  | 0.088862 | 0.722449 | 0.867333 |
| Sf1      | 0.031568 | 0.722544 | 0.867377 |
| A630089N | 0.177311 | 0.72327  | 0.867971 |
| Crmp1    | 0.313039 | 0.723376 | 0.868011 |
| Zfp511   | 0.054475 | 0.723535 | 0.868012 |
| Ehd2     | 0.028127 | 0.723975 | 0.868398 |
| Gm9776   | 0.171411 | 0.724329 | 0.868754 |
| Gm48586  | 0.17025  | 0.724537 | 0.868794 |
| Pcgf3    | 0.054913 | 0.724774 | 0.868982 |
| Atp6v1d  | 0.035866 | 0.725275 | 0.869254 |
| Prep     | 0.061665 | 0.725404 | 0.869254 |
| Gm45441  | 0.180889 | 0.725559 | 0.869254 |
| Lym7     | 0.097778 | 0.725918 | 0.869476 |
| Apobec1  | 0.097692 | 0.726129 | 0.869627 |
| Ybey     | 0.115014 | 0.72616  | 0.869627 |
| Man2c1os | 0.258456 | 0.726428 | 0.869804 |
| Ulk1     | 0.052003 | 0.726709 | 0.870005 |
| Cdv3     | 0.031171 | 0.727258 | 0.870233 |
| Dlgap4   | 0.037068 | 0.727314 | 0.870233 |
| Prps2    | 0.124133 | 0.727423 | 0.870233 |
| Fabp3    | 0.262662 | 0.727421 | 0.870233 |
| Rabggtb  | 0.051588 | 0.727623 | 0.870403 |
| Gsk3b    | 0.020946 | 0.728029 | 0.870819 |
| Gm28370  | 0.523672 | 0.728485 | 0.871098 |
| Naxe     | 0.037008 | 0.728772 | 0.871098 |
| Taf1a    | 0.104861 | 0.728908 | 0.871098 |
| Rorc     | 0.252774 | 0.728963 | 0.871098 |

|          |          |          |          |
|----------|----------|----------|----------|
| Rft1     | 0.081032 | 0.728982 | 0.871098 |
| Fam133b  | 0.034167 | 0.729005 | 0.871098 |
| Gm4419   | 0.191244 | 0.729018 | 0.871098 |
| 2900060B | 0.117311 | 0.729224 | 0.871165 |
| Gpalpp1  | 0.046423 | 0.729515 | 0.871166 |
| Phtf1os  | 0.234492 | 0.729939 | 0.871486 |
| Ccdc160  | 0.122703 | 0.730265 | 0.871599 |
| Gm15834  | 0.373297 | 0.730431 | 0.871599 |
| Hps3     | 0.060697 | 0.730546 | 0.871599 |
| Gm28229  | 0.235424 | 0.730602 | 0.871599 |
| Atxn7l2  | 0.148696 | 0.730909 | 0.871608 |
| Cbx8     | 0.101946 | 0.73094  | 0.871608 |
| Lsm2     | 0.040075 | 0.731034 | 0.871608 |
| A430018G | 0.09975  | 0.731078 | 0.871608 |
| Haus4    | 0.078824 | 0.731176 | 0.871608 |
| Gm37788  | 0.083376 | 0.731311 | 0.871681 |
| Scaf8    | 0.043152 | 0.731577 | 0.871758 |
| Taok1    | 0.02341  | 0.731609 | 0.871758 |
| Cd276    | 0.214368 | 0.731843 | 0.871899 |
| A130050O | 0.136575 | 0.7323   | 0.872305 |
| Pcdhb14  | 0.103937 | 0.732643 | 0.87261  |
| Epha3    | 0.193849 | 0.732717 | 0.87261  |
| Gm38393  | 0.244742 | 0.733134 | 0.872881 |
| Efcab15  | 0.242821 | 0.733549 | 0.87326  |
| Rnpepl1  | 0.034194 | 0.733568 | 0.87326  |
| A930036K | 0.066457 | 0.733751 | 0.873353 |
| Uba1     | 0.033383 | 0.733764 | 0.873353 |
| Yipf5    | 0.04075  | 0.733877 | 0.873419 |
| Rfwd3    | 0.067145 | 0.73406  | 0.873498 |
| Pfdn4    | 0.047082 | 0.734339 | 0.873729 |
| Zfp346   | 0.088235 | 0.735183 | 0.874409 |
| Myl4     | 0.086135 | 0.735221 | 0.874409 |
| Gm14636  | 0.098986 | 0.735369 | 0.874435 |
| Gm21846  | 0.256263 | 0.735424 | 0.874435 |
| Thrb     | 0.086437 | 0.735497 | 0.874443 |
| Atf5     | 0.050852 | 0.735905 | 0.874735 |
| Stac2    | 0.194788 | 0.736434 | 0.875209 |
| Tigd2    | 0.044218 | 0.73673  | 0.875492 |
| Gm45413  | 0.11604  | 0.737156 | 0.875859 |
| Pdcl3    | 0.031099 | 0.737337 | 0.875865 |
| Foxj2    | 0.049931 | 0.737501 | 0.875982 |
| Ccdc163  | 0.07997  | 0.737626 | 0.875982 |
| Pknox2   | 0.18141  | 0.7377   | 0.875982 |
| Peli3    | 0.087684 | 0.737728 | 0.875982 |
| Brip1os  | 0.067223 | 0.73795  | 0.876177 |
| Fam98b   | 0.050925 | 0.738036 | 0.876209 |
| Prps1    | 0.056015 | 0.738271 | 0.876365 |

|           |          |          |          |
|-----------|----------|----------|----------|
| Gm37583   | 0.135212 | 0.738285 | 0.876365 |
| Gm26814   | 0.313868 | 0.738393 | 0.876425 |
| Ctnnd1    | 0.028785 | 0.73871  | 0.876635 |
| Kcnn2     | 0.452149 | 0.738766 | 0.876635 |
| 1700040D  | 0.311673 | 0.738804 | 0.876635 |
| Srp9      | 0.023382 | 0.73889  | 0.876668 |
| 1810021B  | 0.224858 | 0.739232 | 0.877003 |
| Ovca2     | 0.126267 | 0.73934  | 0.877062 |
| Zmynd8    | 0.034857 | 0.739497 | 0.877078 |
| Zfp37     | 0.066437 | 0.739609 | 0.877103 |
| Ankrd52   | 0.091575 | 0.740074 | 0.877378 |
| Trp53bp2  | 0.065577 | 0.740175 | 0.877427 |
| R3hdm4    | 0.041945 | 0.740521 | 0.877698 |
| Ppil3     | 0.086268 | 0.740604 | 0.877727 |
| Gm47794   | 0.33833  | 0.740832 | 0.87788  |
| Fto       | 0.035541 | 0.741027 | 0.87802  |
| Stoml2    | 0.042616 | 0.741237 | 0.87811  |
| St3gal5   | 0.062565 | 0.741312 | 0.87811  |
| Gm44114   | 0.495378 | 0.741646 | 0.878336 |
| Mef2b     | 0.221729 | 0.742162 | 0.878739 |
| Cacng7    | 0.140043 | 0.742553 | 0.879039 |
| Gm43162   | 0.110847 | 0.74258  | 0.879039 |
| Gm7908    | 0.207685 | 0.742592 | 0.879039 |
| Rnf19a    | 0.040213 | 0.743029 | 0.87916  |
| Gm17092   | 0.145624 | 0.743216 | 0.87916  |
| Gpld1     | 0.152632 | 0.743222 | 0.87916  |
| 4931415C  | 0.209017 | 0.743499 | 0.879348 |
| Gm37499   | 0.212258 | 0.743575 | 0.879369 |
| Stk11ip   | 0.107602 | 0.743873 | 0.87948  |
| Fdxr      | 0.101722 | 0.744082 | 0.879552 |
| Cpsf7     | 0.040121 | 0.744398 | 0.879786 |
| Rtf1      | 0.025124 | 0.744858 | 0.880044 |
| Gm32282   | 0.192009 | 0.745384 | 0.880286 |
| mt-Tg     | 0.125723 | 0.745497 | 0.880286 |
| Sdr42e1   | 0.210519 | 0.745603 | 0.880286 |
| Kifc1     | 0.288847 | 0.745639 | 0.880286 |
| Zfp133-ps | 0.533268 | 0.745703 | 0.880286 |
| Dnajc9    | 0.051203 | 0.745943 | 0.880387 |
| Gm37423   | 0.090866 | 0.746056 | 0.880425 |
| Car11     | 0.178949 | 0.74629  | 0.880562 |
| Slc25a1   | 0.042007 | 0.746495 | 0.880665 |
| Pcdh15    | 0.071522 | 0.746743 | 0.88087  |
| Gm6483    | 0.274801 | 0.746811 | 0.88087  |
| Pbdc1     | 0.053018 | 0.747022 | 0.880925 |
| Dtymk     | 0.046988 | 0.74725  | 0.88107  |
| Tbx2      | 0.048302 | 0.747642 | 0.881179 |
| Dhx37     | 0.139504 | 0.747728 | 0.881179 |

|           |          |          |          |
|-----------|----------|----------|----------|
| Gm44256   | 0.476039 | 0.747777 | 0.881179 |
| Gm50071   | 0.31471  | 0.747792 | 0.881179 |
| Aebp2     | 0.033654 | 0.747813 | 0.881179 |
| Dnai1     | 0.605515 | 0.74836  | 0.881516 |
| Ccdc15    | 0.103443 | 0.748847 | 0.881886 |
| Ttc9c     | 0.059906 | 0.748884 | 0.881886 |
| Gm45769   | 0.191338 | 0.749246 | 0.882173 |
| Gm11737   | 0.197077 | 0.749443 | 0.882266 |
| Shisa8    | 0.289041 | 0.749885 | 0.882522 |
| Scarb2    | 0.034094 | 0.749945 | 0.882522 |
| 2310068J1 | 0.271141 | 0.750598 | 0.883041 |
| Abtb1     | 0.06299  | 0.750664 | 0.883041 |
| Scmh1     | 0.036169 | 0.750825 | 0.883041 |
| Scn4a     | 0.269667 | 0.750944 | 0.883041 |
| Mri1      | 0.065293 | 0.750983 | 0.883041 |
| Ide       | 0.041102 | 0.751034 | 0.883041 |
| Sugct     | 0.153875 | 0.751045 | 0.883041 |
| Plekha1   | 0.031806 | 0.75116  | 0.883107 |
| Nol10     | 0.079874 | 0.751567 | 0.883516 |
| Gm48766   | 0.167264 | 0.75181  | 0.883733 |
| Tesk2     | 0.149667 | 0.752001 | 0.883888 |
| Ilkap     | 0.033276 | 0.752235 | 0.88396  |
| Gm45444   | 0.399675 | 0.752313 | 0.88396  |
| Abhd8     | 0.047686 | 0.752358 | 0.88396  |
| 2310011JC | 0.045287 | 0.752439 | 0.883986 |
| Tenm2     | 0.358348 | 0.752507 | 0.883996 |
| Prdm2     | 0.030508 | 0.753096 | 0.884549 |
| Gm37115   | 0.21405  | 0.753256 | 0.884619 |
| Gm37248   | 0.573317 | 0.753365 | 0.884658 |
| Stx1a     | 0.064583 | 0.75381  | 0.884993 |
| Chml      | 0.077831 | 0.753944 | 0.884993 |
| Ebi3      | 0.268396 | 0.754017 | 0.884993 |
| Prob1     | 0.173627 | 0.754064 | 0.884993 |
| Cep43     | 0.07747  | 0.754374 | 0.885148 |
| Dffa      | 0.070005 | 0.754373 | 0.885148 |
| Prepl     | 0.088772 | 0.754538 | 0.885257 |
| Tmem198l  | 0.0767   | 0.754586 | 0.885257 |
| Hint2     | 0.031817 | 0.755133 | 0.885553 |
| Rbm22     | 0.033911 | 0.755427 | 0.88579  |
| Ppp1r37   | 0.043572 | 0.755694 | 0.886002 |
| Gm4204    | 0.104041 | 0.755895 | 0.886168 |
| Eef2k     | 0.05643  | 0.756044 | 0.886205 |
| Syde1     | 0.047756 | 0.756351 | 0.886495 |
| Cntfr     | 0.119962 | 0.756668 | 0.886723 |
| Slain1    | 0.225141 | 0.756712 | 0.886723 |
| Necap2    | 0.037893 | 0.756866 | 0.886811 |
| Gm13408   | 0.285045 | 0.756919 | 0.886811 |

|           |          |          |          |
|-----------|----------|----------|----------|
| Zfp180    | 0.053703 | 0.756976 | 0.886811 |
| Zfp748    | 0.078867 | 0.757431 | 0.886974 |
| Wbp1      | 0.039534 | 0.757447 | 0.886974 |
| Mthfd1    | 0.07959  | 0.757463 | 0.886974 |
| Tm4sf1    | 0.016721 | 0.757974 | 0.887355 |
| Gm19040   | 0.38106  | 0.758315 | 0.887686 |
| Rpl21-ps1 | 0.33145  | 0.758752 | 0.887886 |
| Bcl2l2    | 0.054155 | 0.758951 | 0.887946 |
| Mfap1b    | 0.032982 | 0.758968 | 0.887946 |
| Gm14207   | 0.08296  | 0.7591   | 0.887946 |
| Men1      | 0.054501 | 0.759123 | 0.887946 |
| Lat2      | 0.259057 | 0.75944  | 0.888099 |
| Pik3c3    | 0.061883 | 0.759802 | 0.888349 |
| Efl1      | 0.068723 | 0.760124 | 0.888607 |
| Polr1h    | 0.030176 | 0.760538 | 0.888849 |
| Plxnc1    | 0.19443  | 0.760916 | 0.88913  |
| Intu      | 0.138344 | 0.761103 | 0.88928  |
| Dpm1      | 0.035583 | 0.761165 | 0.889283 |
| Fam217a   | 0.095247 | 0.761369 | 0.889383 |
| Gm13349   | 0.140694 | 0.761706 | 0.889568 |
| 2610002N  | 0.054891 | 0.761783 | 0.889588 |
| Lrrc45    | 0.077476 | 0.761892 | 0.889645 |
| Pced1b    | 0.102789 | 0.76195  | 0.889645 |
| Mir670hg  | 0.233946 | 0.762038 | 0.889678 |
| Pts       | 0.043145 | 0.762183 | 0.889735 |
| Arhgap32  | 0.046911 | 0.762338 | 0.88975  |
| Radil     | 0.132112 | 0.762943 | 0.890073 |
| Inpp5a    | 0.043275 | 0.763184 | 0.890073 |
| Mif       | 0.020316 | 0.763272 | 0.890073 |
| Nagpa     | 0.06671  | 0.763296 | 0.890073 |
| Pgap6     | 0.11639  | 0.763354 | 0.890073 |
| Al847159  | 0.038373 | 0.763527 | 0.890167 |
| Sars2     | 0.127434 | 0.763917 | 0.89035  |
| Plcb4     | 0.024061 | 0.763985 | 0.89035  |
| Arid2     | 0.032496 | 0.7641   | 0.89035  |
| Gm45133   | 0.18775  | 0.764493 | 0.890602 |
| Pak1      | 0.18155  | 0.76473  | 0.890663 |
| Gm10643   | 0.199439 | 0.764785 | 0.890663 |
| Mrpl13    | 0.034668 | 0.765056 | 0.890811 |
| Gm43689   | 0.249608 | 0.765178 | 0.890811 |
| Cenpl     | 0.108647 | 0.765412 | 0.890836 |
| Gm33989   | 0.041024 | 0.765595 | 0.890836 |
| Gm36445   | 0.227389 | 0.765616 | 0.890836 |
| Gm14322   | 0.240635 | 0.765805 | 0.890836 |
| Fadd      | 0.081451 | 0.765815 | 0.890836 |
| Prkg1     | 0.042907 | 0.765827 | 0.890836 |
| C530005A  | 0.19939  | 0.765998 | 0.890852 |

|           |          |          |          |
|-----------|----------|----------|----------|
| Zfp846    | 0.074023 | 0.766142 | 0.890927 |
| Bend4     | 0.301617 | 0.766429 | 0.891191 |
| Gm2109    | 0.395222 | 0.766724 | 0.8914   |
| Spryd4    | 0.084207 | 0.766802 | 0.8914   |
| Tie1      | 0.023555 | 0.767424 | 0.891779 |
| Nup210    | 0.281159 | 0.767614 | 0.891876 |
| Golga7    | 0.03109  | 0.768068 | 0.892064 |
| Fam160b2  | 0.060687 | 0.768169 | 0.892064 |
| Nt5dc1    | 0.065609 | 0.768247 | 0.892064 |
| Zcchc2    | 0.055868 | 0.768252 | 0.892064 |
| Dclk2     | 0.087394 | 0.768484 | 0.892263 |
| Ajm1      | 0.308346 | 0.768618 | 0.89235  |
| Tmsb15b1  | 0.13135  | 0.768825 | 0.892482 |
| Ppargc1a  | 0.076164 | 0.768911 | 0.892482 |
| Catsper2  | 0.197294 | 0.769277 | 0.8927   |
| Exosc8    | 0.041267 | 0.769629 | 0.89297  |
| Dip2b     | 0.029231 | 0.769996 | 0.893162 |
| Tbk1      | 0.040452 | 0.770029 | 0.893162 |
| 1700019L1 | 0.101169 | 0.770134 | 0.89321  |
| Dlgap3    | 0.320767 | 0.770399 | 0.893349 |
| Pfkfb4    | 0.105939 | 0.77058  | 0.89345  |
| Gm45088   | 0.257646 | 0.770854 | 0.89363  |
| mt-Tk     | 0.238464 | 0.771073 | 0.89363  |
| Snrpd2    | 0.023098 | 0.771089 | 0.89363  |
| Rnf150    | 0.062327 | 0.771093 | 0.89363  |
| Epn1      | 0.030029 | 0.771416 | 0.893924 |
| 1700052K  | 0.093765 | 0.771556 | 0.893924 |
| Capza2    | 0.019016 | 0.771686 | 0.893971 |
| Rars      | 0.04235  | 0.771793 | 0.894025 |
| C2cd2l    | 0.038864 | 0.77213  | 0.894209 |
| Srprb     | 0.046871 | 0.772314 | 0.894262 |
| Trappc10  | 0.03541  | 0.772355 | 0.894262 |
| Fcf1      | 0.040697 | 0.772575 | 0.894379 |
| Vat1l     | 0.069833 | 0.772844 | 0.89462  |
| Ramp1     | 0.118398 | 0.772931 | 0.894652 |
| Gm49494   | 0.277582 | 0.77308  | 0.894725 |
| Mob1a     | 0.027045 | 0.773131 | 0.894725 |
| BC046251  | 0.521593 | 0.773449 | 0.894758 |
| C1qbp     | 0.032273 | 0.773464 | 0.894758 |
| C230085N  | 0.314319 | 0.773828 | 0.895067 |
| Ifnar2    | 0.020369 | 0.774167 | 0.895321 |
| 1700055D  | 0.299644 | 0.774251 | 0.895349 |
| Diablo    | 0.042825 | 0.774436 | 0.895429 |
| Ttpal     | 0.05641  | 0.774876 | 0.895551 |
| Tincr     | 0.196863 | 0.775005 | 0.895599 |
| Cbwd1     | 0.055926 | 0.775554 | 0.896095 |
| Cyb561d1  | 0.095786 | 0.77586  | 0.896194 |



|          |          |          |          |
|----------|----------|----------|----------|
| Gm32250  | 0.253938 | 0.775939 | 0.896194 |
| Gm43598  | 0.245889 | 0.776061 | 0.896266 |
| Vrk1     | 0.056877 | 0.776126 | 0.896271 |
| Slc17a3  | 0.504008 | 0.776642 | 0.896716 |
| Myg1     | 0.048824 | 0.777237 | 0.897139 |
| Phf21a   | 0.032907 | 0.777722 | 0.897354 |
| Pip4k2a  | 0.052173 | 0.778027 | 0.897557 |
| Lpgat1   | 0.037818 | 0.778128 | 0.897557 |
| Pgk1     | 0.023583 | 0.778139 | 0.897557 |
| Thnsl1   | 0.103901 | 0.778835 | 0.898012 |
| R74862   | 0.102492 | 0.778883 | 0.898012 |
| Nanp     | 0.073748 | 0.77912  | 0.898205 |
| Srebf1   | 0.049725 | 0.779271 | 0.898309 |
| Ndufa12  | 0.027257 | 0.779504 | 0.898456 |
| Zfp455   | 0.157566 | 0.779804 | 0.898525 |
| Zfp971   | 0.108571 | 0.779818 | 0.898525 |
| Gm48237  | 0.378575 | 0.780442 | 0.898968 |
| Gm44830  | 0.232631 | 0.780973 | 0.899371 |
| Spring1  | 0.070399 | 0.781209 | 0.8995   |
| Gm37891  | 0.21532  | 0.781214 | 0.8995   |
| Casc1    | 0.317625 | 0.781474 | 0.8995   |
| Wdr27    | 0.077489 | 0.781496 | 0.8995   |
| Gm15446  | 0.087561 | 0.781617 | 0.8995   |
| Vps13b   | 0.040322 | 0.781903 | 0.899612 |
| Pigs     | 0.053657 | 0.782022 | 0.899675 |
| Kin      | 0.03972  | 0.782084 | 0.899675 |
| Ephb2    | 0.390497 | 0.782332 | 0.899829 |
| Rab23    | 0.055628 | 0.782446 | 0.899842 |
| Hectd2   | 0.157837 | 0.782524 | 0.899842 |
| Cbx2     | 0.120681 | 0.782876 | 0.899971 |
| Plvap    | 0.2561   | 0.783387 | 0.900489 |
| Tm9sf1   | 0.081883 | 0.783694 | 0.90068  |
| Man2c1   | 0.053464 | 0.783734 | 0.90068  |
| Gm42941  | 0.159535 | 0.784051 | 0.900976 |
| Eif2b1   | 0.060428 | 0.784194 | 0.901071 |
| Ttc4     | 0.044626 | 0.784379 | 0.90109  |
| Nars2    | 0.098355 | 0.784504 | 0.90115  |
| Pan3     | 0.024418 | 0.784849 | 0.901477 |
| Ccnt1    | 0.027089 | 0.786325 | 0.902549 |
| Vapb     | 0.027327 | 0.786519 | 0.902703 |
| Zdhhc17  | 0.037863 | 0.786598 | 0.902724 |
| Ctso     | 0.029844 | 0.786764 | 0.902792 |
| Shfl     | 0.045311 | 0.786799 | 0.902792 |
| Gm37519  | 0.155775 | 0.786837 | 0.902792 |
| Otulinl  | 0.168099 | 0.786923 | 0.90282  |
| St3gal3  | 0.083002 | 0.787048 | 0.90283  |
| E130018N | 0.494068 | 0.78751  | 0.903195 |

|            |          |          |          |
|------------|----------|----------|----------|
| E03002211  | 0.074353 | 0.787576 | 0.903195 |
| Gm39214    | 0.219556 | 0.787611 | 0.903195 |
| Gpatch8    | 0.021693 | 0.787697 | 0.903224 |
| Eif4h      | 0.018736 | 0.788158 | 0.903462 |
| Morf4l1-p: | 0.122206 | 0.78819  | 0.903462 |
| Rcor1      | 0.031002 | 0.788206 | 0.903462 |
| Ctnnal1    | 0.079812 | 0.788725 | 0.903639 |
| Traf2      | 0.063266 | 0.788824 | 0.903639 |
| Sp1        | 0.02466  | 0.788997 | 0.903639 |
| Zfp709     | 0.117423 | 0.78905  | 0.903639 |
| Gm47439    | 0.335388 | 0.789586 | 0.903939 |
| Ndufa9     | 0.030416 | 0.789629 | 0.903939 |
| Otulin     | 0.04021  | 0.789648 | 0.903939 |
| Zfp942     | 0.056471 | 0.789793 | 0.903972 |
| Dnajc18    | 0.044527 | 0.789835 | 0.903972 |
| Spg21      | 0.035595 | 0.790161 | 0.90425  |
| Fam135a    | 0.041524 | 0.790687 | 0.90471  |
| Gm13785    | 0.197448 | 0.790858 | 0.90471  |
| Gm21988    | 0.100107 | 0.791152 | 0.904761 |
| Glrx5      | 0.027216 | 0.791329 | 0.904894 |
| Cdk8       | 0.03891  | 0.791516 | 0.904972 |
| Ccdc97     | 0.045756 | 0.791767 | 0.905125 |
| Mpped2     | 0.059913 | 0.791948 | 0.905191 |
| Klc3       | 0.072384 | 0.791951 | 0.905191 |
| Gba        | 0.05834  | 0.792174 | 0.905237 |
| Mis18a     | 0.053954 | 0.792341 | 0.905237 |
| Dna2       | 0.150901 | 0.792354 | 0.905237 |
| Rbmx2      | 0.057565 | 0.792459 | 0.905245 |
| Polr2a     | 0.024191 | 0.792483 | 0.905245 |
| Pigp       | 0.032164 | 0.793048 | 0.905641 |
| Coq10a     | 0.049045 | 0.793302 | 0.905836 |
| Ccdc102a   | 0.043898 | 0.793663 | 0.906047 |
| Rtf2       | 0.028299 | 0.793682 | 0.906047 |
| Sumo2      | 0.013466 | 0.793729 | 0.906047 |
| Zfp54      | 0.154157 | 0.794118 | 0.906357 |
| Gm47659    | 0.473526 | 0.794443 | 0.906586 |
| Elp5       | 0.038261 | 0.794634 | 0.906735 |
| Larp6      | 0.106134 | 0.794888 | 0.906955 |
| Tram1l1    | 0.121396 | 0.795014 | 0.907029 |
| Gm42508    | 0.294361 | 0.795313 | 0.907238 |
| Map3k12    | 0.050728 | 0.796066 | 0.907648 |
| Bud23      | 0.04353  | 0.796306 | 0.907812 |
| Klhdc3     | 0.044861 | 0.796493 | 0.907956 |
| Anpep      | 0.062947 | 0.796723 | 0.907991 |
| Asah1      | 0.028694 | 0.796836 | 0.907991 |
| Chchd6     | 0.050438 | 0.796888 | 0.907991 |
| Gm37018    | 0.216154 | 0.797134 | 0.908098 |

|            |          |          |          |
|------------|----------|----------|----------|
| C430042M   | 0.165407 | 0.797163 | 0.908098 |
| Fnip2      | 0.03713  | 0.797474 | 0.908383 |
| Ranbp6     | 0.05221  | 0.797649 | 0.908513 |
| Sec22c     | 0.07194  | 0.79855  | 0.909262 |
| D230022J   | 0.297652 | 0.799204 | 0.909596 |
| BC005537   | 0.018964 | 0.799548 | 0.909776 |
| Slc35e4    | 0.043483 | 0.800189 | 0.910083 |
| Ppp4r1l-ps | 0.035547 | 0.800304 | 0.910083 |
| Tvp23a     | 0.141394 | 0.800559 | 0.910234 |
| Cstf2t     | 0.040494 | 0.800851 | 0.910498 |
| Gmnn       | 0.051604 | 0.801037 | 0.910571 |
| Zc3h12c    | 0.053046 | 0.801379 | 0.910821 |
| Pfkfb1     | 0.22437  | 0.801688 | 0.910986 |
| Ccdc186    | 0.025734 | 0.801721 | 0.910986 |
| Gm42986    | 0.091236 | 0.801731 | 0.910986 |
| Gm46440    | 0.254954 | 0.8022   | 0.911399 |
| H2bc9      | 0.263711 | 0.802371 | 0.911464 |
| 9330102E   | 0.218516 | 0.802835 | 0.911853 |
| Nup50      | 0.035638 | 0.803038 | 0.911945 |
| Spon1      | 0.083388 | 0.80314  | 0.911991 |
| Gm43187    | 0.125922 | 0.803477 | 0.912305 |
| Csdc2      | 0.11762  | 0.803934 | 0.912504 |
| Elf2       | 0.020489 | 0.803996 | 0.912504 |
| Sun1       | 0.026388 | 0.80432  | 0.912709 |
| Hhex       | 0.031333 | 0.804479 | 0.91274  |
| Spata33    | 0.224985 | 0.804615 | 0.91274  |
| Atl2       | 0.031495 | 0.804615 | 0.91274  |
| Ccdc120    | 0.132388 | 0.804657 | 0.91274  |
| Poglut1    | 0.037638 | 0.804713 | 0.91274  |
| Bag1       | 0.019992 | 0.805148 | 0.913026 |
| Trappc11   | 0.037009 | 0.805262 | 0.913086 |
| Gm48604    | 0.118332 | 0.805525 | 0.913314 |
| Izumo4     | 0.052815 | 0.805679 | 0.913371 |
| Gm38021    | 0.099111 | 0.806466 | 0.913931 |
| mt-Tm      | 0.081202 | 0.806529 | 0.913931 |
| Ubiad1     | 0.086464 | 0.806557 | 0.913931 |
| Xpot       | 0.035713 | 0.806663 | 0.91397  |
| Arrdc4     | 0.123795 | 0.806717 | 0.91397  |
| Trp53i11   | 0.055288 | 0.807081 | 0.914179 |
| Gm7868     | 0.115971 | 0.80708  | 0.914179 |
| Lrrc42     | 0.04518  | 0.807275 | 0.914261 |
| Coq5       | 0.038468 | 0.807415 | 0.91435  |
| Dnmbp      | 0.048454 | 0.807488 | 0.914363 |
| Gm21596    | 0.06845  | 0.808131 | 0.914746 |
| Paxx       | 0.035238 | 0.808302 | 0.914801 |
| Spata2     | 0.043837 | 0.808677 | 0.915086 |
| Tmbim6     | 0.012498 | 0.808877 | 0.915227 |

|           |          |          |          |
|-----------|----------|----------|----------|
| Exoc4     | 0.031899 | 0.808923 | 0.915227 |
| Irf8      | 0.093781 | 0.8091   | 0.915274 |
| Slc38a7   | 0.06784  | 0.809343 | 0.915426 |
| Taf2      | 0.039359 | 0.809686 | 0.915675 |
| Zbtb33    | 0.051917 | 0.809897 | 0.915813 |
| BC003965  | 0.029455 | 0.810654 | 0.916367 |
| Gm47588   | 0.268056 | 0.810793 | 0.916442 |
| Ormdl2    | 0.037812 | 0.810905 | 0.916499 |
| Pgam1     | 0.017347 | 0.811046 | 0.916589 |
| Zkscan6   | 0.072834 | 0.811256 | 0.916619 |
| Asb1      | 0.064083 | 0.81154  | 0.916802 |
| Gm48442   | 0.300659 | 0.811848 | 0.916943 |
| Ints5     | 0.062539 | 0.812175 | 0.917034 |
| Pafah1b2  | 0.021793 | 0.812629 | 0.917157 |
| Tmsb15b2  | 0.20344  | 0.812703 | 0.917157 |
| Rpl36-ps9 | 0.133735 | 0.812896 | 0.917157 |
| Ddx20     | 0.065807 | 0.81303  | 0.91717  |
| Rfx3      | 0.058557 | 0.81319  | 0.917223 |
| Cdc27     | 0.036034 | 0.813223 | 0.917223 |
| Pcdhga11  | 0.153688 | 0.81326  | 0.917223 |
| Scand1    | 0.021286 | 0.814039 | 0.917756 |
| Tox       | 0.081667 | 0.814303 | 0.917923 |
| Cebpa     | 0.095663 | 0.814371 | 0.917923 |
| Gins1     | 0.214275 | 0.8145   | 0.917999 |
| Rpl38-ps2 | 0.068718 | 0.814761 | 0.918085 |
| Pkia      | 0.040253 | 0.815103 | 0.918402 |
| Mon1a     | 0.065083 | 0.815398 | 0.918665 |
| Mrpl51    | 0.02327  | 0.815701 | 0.918888 |
| Trpm1     | 0.101328 | 0.815807 | 0.918918 |
| Podxl2    | 0.088001 | 0.815971 | 0.918964 |
| Fam83h    | 0.329768 | 0.816331 | 0.919232 |
| Iqsec3    | 0.07198  | 0.81671  | 0.919495 |
| Ighmbp2   | 0.082142 | 0.816836 | 0.919495 |
| Polh      | 0.07428  | 0.816872 | 0.919495 |
| Gm37437   | 0.188357 | 0.817117 | 0.919633 |
| Wdr46-ps  | 0.185052 | 0.817374 | 0.919651 |
| Lratd2    | 0.055333 | 0.817517 | 0.919651 |
| Gm43681   | 0.109336 | 0.817593 | 0.919651 |
| Srsf10    | 0.02133  | 0.818167 | 0.919916 |
| Tsr1      | 0.084321 | 0.818591 | 0.920136 |
| Gm42067   | 0.098256 | 0.818713 | 0.920184 |
| C1qtnf2   | 0.061741 | 0.819756 | 0.920674 |
| Gm26879   | 0.106788 | 0.819764 | 0.920674 |
| Anapc10   | 0.037321 | 0.820048 | 0.920758 |
| Shisal1   | 0.128153 | 0.820102 | 0.920758 |
| Slu7      | 0.024208 | 0.82031  | 0.920872 |
| Nsmaf     | 0.034782 | 0.820496 | 0.92093  |

|           |          |          |          |
|-----------|----------|----------|----------|
| Usp1      | 0.027873 | 0.820546 | 0.92093  |
| Sptbn4    | 0.154608 | 0.820672 | 0.920969 |
| Ndufa11   | 0.015877 | 0.821409 | 0.921347 |
| Tmem107   | 0.062256 | 0.821478 | 0.921355 |
| Ddx39a    | 0.035741 | 0.822226 | 0.922    |
| Gm37303   | 0.106098 | 0.822524 | 0.922183 |
| Pdik1l    | 0.039499 | 0.822785 | 0.922406 |
| 1700084E: | 0.09446  | 0.822938 | 0.922436 |
| Gm38359   | 0.291901 | 0.822996 | 0.922436 |
| Zfp784    | 0.082651 | 0.823618 | 0.922829 |
| Isoc2b    | 0.104016 | 0.823655 | 0.922829 |
| Commd2    | 0.02683  | 0.82388  | 0.923003 |
| Supt5     | 0.021193 | 0.823934 | 0.923003 |
| Fem1al    | 0.212331 | 0.824077 | 0.923094 |
| Xrcc5     | 0.068675 | 0.8246   | 0.923322 |
| Dnm3      | 0.018735 | 0.825134 | 0.923712 |
| Abitram   | 0.065555 | 0.825393 | 0.923808 |
| Nufip2    | 0.019453 | 0.825817 | 0.924077 |
| Bub1b     | 0.10094  | 0.825869 | 0.924077 |
| Sepsecs   | 0.057519 | 0.82588  | 0.924077 |
| Nfyc      | 0.037045 | 0.826517 | 0.924513 |
| Il34      | 0.037131 | 0.827381 | 0.925287 |
| Fem1a     | 0.035077 | 0.827498 | 0.925334 |
| Sema6c    | 0.074456 | 0.827858 | 0.92553  |
| Pold2     | 0.051828 | 0.828286 | 0.925671 |
| Sema6d    | 0.02547  | 0.828294 | 0.925671 |
| Slamf1    | 0.223683 | 0.829793 | 0.92685  |
| Smim26    | 0.024646 | 0.829844 | 0.92685  |
| 2810029C  | 0.075865 | 0.830005 | 0.926891 |
| Mesd      | 0.026666 | 0.830526 | 0.927214 |
| Gm10399   | 0.074384 | 0.830568 | 0.927214 |
| Tmem215   | 0.256953 | 0.830668 | 0.927214 |
| Papola    | 0.016707 | 0.830724 | 0.927214 |
| Hdhd3     | 0.097243 | 0.831469 | 0.927853 |
| Stk11     | 0.022559 | 0.832308 | 0.928473 |
| Ctxn1     | 0.091349 | 0.832413 | 0.928473 |
| Cox18     | 0.04826  | 0.832733 | 0.928568 |
| Wnk2      | 0.060365 | 0.832787 | 0.928568 |
| Scoc      | 0.02074  | 0.832809 | 0.928568 |
| Actl6b    | 0.2912   | 0.83291  | 0.928612 |
| Copa      | 0.018355 | 0.833095 | 0.928749 |
| Gm43527   | 0.261874 | 0.833202 | 0.92878  |
| Asap3     | 0.053457 | 0.833273 | 0.92878  |
| Herc1     | 0.016887 | 0.83345  | 0.92878  |
| E2f5      | 0.037813 | 0.833495 | 0.92878  |
| Nrn1      | 0.236009 | 0.833494 | 0.92878  |
| Jph4      | 0.212623 | 0.833766 | 0.929012 |

|           |          |          |          |
|-----------|----------|----------|----------|
| Zdhhc16   | 0.039218 | 0.834039 | 0.92906  |
| Gm43340   | 0.144281 | 0.834051 | 0.92906  |
| Ogfod1    | 0.050147 | 0.834503 | 0.929281 |
| Ncor2     | 0.021526 | 0.834771 | 0.929324 |
| Ccdc115   | 0.031176 | 0.835017 | 0.929439 |
| Kctd9     | 0.045777 | 0.835944 | 0.930125 |
| Gm43560   | 0.131897 | 0.836213 | 0.930355 |
| Noc2l     | 0.036179 | 0.836347 | 0.930425 |
| Gm43679   | 0.121726 | 0.836401 | 0.930425 |
| Cpt1c     | 0.092097 | 0.836747 | 0.930672 |
| Scrib     | 0.039631 | 0.837037 | 0.930925 |
| Gtf2h5    | 0.017705 | 0.837388 | 0.931178 |
| 5330406M  | 0.056346 | 0.837782 | 0.931477 |
| Gm38073   | 0.358215 | 0.83863  | 0.931935 |
| U2surp    | 0.016392 | 0.838765 | 0.931975 |
| Mark2     | 0.021431 | 0.83879  | 0.931975 |
| Nup214    | 0.028343 | 0.838996 | 0.932077 |
| Rnf170    | 0.036547 | 0.839023 | 0.932077 |
| Ss18l2    | 0.025907 | 0.839986 | 0.932716 |
| Gnas      | 0.007556 | 0.840142 | 0.932716 |
| Syt9      | 0.133378 | 0.840239 | 0.932716 |
| Mrps17    | 0.02285  | 0.840386 | 0.932716 |
| Bend7     | 0.033829 | 0.840627 | 0.932908 |
| Rrm1      | 0.036241 | 0.840735 | 0.932955 |
| Tmco6     | 0.058293 | 0.840887 | 0.932989 |
| Aqp1      | 0.049199 | 0.841176 | 0.933172 |
| Atp5g3    | 0.014007 | 0.841698 | 0.933682 |
| Tsen15    | 0.029514 | 0.842318 | 0.934298 |
| Atg4a     | 0.042417 | 0.842378 | 0.934298 |
| Riox2     | 0.045244 | 0.842673 | 0.934445 |
| Pclo      | 0.052194 | 0.842944 | 0.934445 |
| Acads     | 0.029816 | 0.843008 | 0.934445 |
| Abca13    | 0.102594 | 0.843019 | 0.934445 |
| Supv3l1   | 0.062743 | 0.843037 | 0.934445 |
| Septin9   | 0.021881 | 0.843073 | 0.934445 |
| Prmt3     | 0.057514 | 0.843875 | 0.93485  |
| Pex12     | 0.062311 | 0.844025 | 0.934946 |
| Pias2     | 0.030978 | 0.844208 | 0.935039 |
| Gm47438   | 0.127242 | 0.844453 | 0.935134 |
| Fam20b    | 0.030848 | 0.844598 | 0.935134 |
| Zfp667    | 0.052523 | 0.844619 | 0.935134 |
| Ctdp1     | 0.046314 | 0.844749 | 0.935134 |
| Dus2      | 0.054501 | 0.844784 | 0.935134 |
| Tarsl2    | 0.051968 | 0.844819 | 0.935134 |
| 9430060I0 | 0.137359 | 0.845043 | 0.935287 |
| C130036L2 | 0.067061 | 0.845082 | 0.935287 |
| Kantr     | 0.042094 | 0.845646 | 0.935556 |

|           |          |          |          |
|-----------|----------|----------|----------|
| Pam16     | 0.022281 | 0.845699 | 0.935556 |
| Slc39a6   | 0.044817 | 0.845815 | 0.935615 |
| Gm37452   | 0.056969 | 0.845945 | 0.935632 |
| D630033A  | 0.059852 | 0.846363 | 0.935875 |
| Gm8186    | 0.052629 | 0.846644 | 0.936041 |
| Gm37123   | 0.071987 | 0.846711 | 0.936041 |
| Rce1      | 0.028907 | 0.846821 | 0.936041 |
| Pyroxd1   | 0.039012 | 0.847167 | 0.936193 |
| Wdr31     | 0.057778 | 0.847477 | 0.936193 |
| Gm21926   | 0.037205 | 0.847777 | 0.936326 |
| Zfp984    | 0.067727 | 0.847834 | 0.936326 |
| Ly86      | 0.252105 | 0.848184 | 0.936493 |
| Khdrbs1   | 0.016436 | 0.848198 | 0.936493 |
| Ipp       | 0.063315 | 0.84831  | 0.936493 |
| Sppl2b    | 0.044913 | 0.848398 | 0.936493 |
| Ppp1r42   | 0.083353 | 0.848489 | 0.936493 |
| Zfp850    | 0.085896 | 0.848501 | 0.936493 |
| 1700101I1 | 0.193963 | 0.848698 | 0.936493 |
| Prr22     | 0.205998 | 0.848707 | 0.936493 |
| Ccndbp1   | 0.023896 | 0.848772 | 0.936493 |
| Gm17315   | 0.132957 | 0.848817 | 0.936493 |
| Gm37649   | 0.2079   | 0.84905  | 0.936523 |
| Arhgap18  | 0.025035 | 0.849148 | 0.936523 |
| Poldip3   | 0.021509 | 0.849149 | 0.936523 |
| E130317F2 | 0.08776  | 0.849168 | 0.936523 |
| 3110031N  | 0.344171 | 0.849303 | 0.936523 |
| 2700046G  | 0.096043 | 0.84932  | 0.936523 |
| Snx3      | 0.010701 | 0.849343 | 0.936523 |
| Tmem63b   | 0.023572 | 0.849609 | 0.936628 |
| Srp54c    | 0.102302 | 0.849804 | 0.936775 |
| Nop14     | 0.025462 | 0.85012  | 0.936984 |
| C430019N  | 0.258918 | 0.850636 | 0.937442 |
| B230303O  | 0.147659 | 0.850782 | 0.937465 |
| Prune1    | 0.037589 | 0.850813 | 0.937465 |
| Rnf41     | 0.033024 | 0.850869 | 0.937465 |
| Klhl26    | 0.042732 | 0.851251 | 0.937817 |
| Zfr       | 0.015621 | 0.851483 | 0.938003 |
| Grik5     | 0.071007 | 0.851687 | 0.938059 |
| Psme1     | 0.012461 | 0.851892 | 0.938059 |
| Mcph1     | 0.086497 | 0.851946 | 0.938059 |
| E230016M  | 0.090527 | 0.852036 | 0.938059 |
| Acot13    | 0.026731 | 0.852069 | 0.938059 |
| 2810032G  | 0.199653 | 0.852135 | 0.938059 |
| Gm14295   | 0.065605 | 0.852166 | 0.938059 |
| Tex9      | 0.051544 | 0.85241  | 0.938059 |
| Polr3f    | 0.028301 | 0.852439 | 0.938059 |
| Gm47816   | 0.074712 | 0.852603 | 0.938059 |

|          |          |          |          |
|----------|----------|----------|----------|
| Fzd7     | 0.097036 | 0.852612 | 0.938059 |
| Gng2     | 0.036043 | 0.852654 | 0.938059 |
| Bend5    | 0.037895 | 0.852865 | 0.938105 |
| Rapgef5  | 0.014374 | 0.852887 | 0.938105 |
| Dip2a    | 0.03021  | 0.853099 | 0.938195 |
| Psen1    | 0.03057  | 0.853337 | 0.938284 |
| Wdr12    | 0.037632 | 0.854559 | 0.938837 |
| Zfp647   | 0.067926 | 0.854796 | 0.938979 |
| Gm20075  | 0.096242 | 0.854916 | 0.938979 |
| Btg3     | 0.017531 | 0.855116 | 0.939104 |
| Mblac1   | 0.081949 | 0.85561  | 0.939467 |
| Snhg11   | 0.073031 | 0.856237 | 0.939783 |
| Tmem178l | 0.138487 | 0.856359 | 0.939848 |
| Eif4a2   | 0.010167 | 0.85647  | 0.939872 |
| Ephx1    | 0.018384 | 0.856854 | 0.939872 |
| Stxbp2   | 0.086844 | 0.856964 | 0.939872 |
| Dap3     | 0.029189 | 0.856977 | 0.939872 |
| Hmgxb4   | 0.022856 | 0.857059 | 0.939872 |
| Tgfbrap1 | 0.026314 | 0.857212 | 0.939872 |
| Fgfr1    | 0.052752 | 0.857322 | 0.939872 |
| Gm38146  | 0.122254 | 0.857741 | 0.939902 |
| Stxbp5l  | 0.128745 | 0.858072 | 0.939902 |
| Samd14   | 0.061875 | 0.858089 | 0.939902 |
| Angel1   | 0.050565 | 0.858142 | 0.939902 |
| Mbd4     | 0.050125 | 0.858197 | 0.939902 |
| 2510046G | 0.03687  | 0.858229 | 0.939902 |
| Gm43460  | 0.110143 | 0.858705 | 0.940217 |
| Brdt     | 0.065535 | 0.858767 | 0.940217 |
| A130077B | 0.311515 | 0.859097 | 0.940297 |
| Tomm6    | 0.044816 | 0.85916  | 0.940297 |
| 1700023H | 0.238677 | 0.859293 | 0.940297 |
| Fubp3    | 0.024496 | 0.859343 | 0.940297 |
| Ssr1     | 0.015726 | 0.859646 | 0.94056  |
| Wdr44    | 0.03071  | 0.860097 | 0.940806 |
| Cpne7    | 0.247403 | 0.86077  | 0.941143 |
| Gm47204  | 0.083239 | 0.860808 | 0.941143 |
| Gm37674  | 0.086281 | 0.860894 | 0.941154 |
| P3h2     | 0.053869 | 0.860982 | 0.941154 |
| Naa60    | 0.02695  | 0.861125 | 0.941215 |
| Dpp6     | 0.304823 | 0.861196 | 0.941222 |
| Pifo     | 0.313056 | 0.861338 | 0.941242 |
| Kctd21   | 0.081176 | 0.861728 | 0.94153  |
| Actr1b   | 0.020779 | 0.861871 | 0.941569 |
| Ccdc14   | 0.059996 | 0.86202  | 0.941569 |
| Ubr3     | 0.017947 | 0.862214 | 0.941569 |
| 9130002K | 0.086601 | 0.862254 | 0.941569 |
| Naxd     | 0.019667 | 0.862348 | 0.941569 |



|           |          |          |          |
|-----------|----------|----------|----------|
| Gm48840   | 0.145351 | 0.862396 | 0.941569 |
| Sntg2     | 0.044289 | 0.862455 | 0.941569 |
| Nckap5    | 0.093756 | 0.862816 | 0.941757 |
| Tmem135   | 0.032688 | 0.863069 | 0.941827 |
| Parp14    | 0.018894 | 0.863376 | 0.941857 |
| Slc20a2   | 0.032794 | 0.8635   | 0.941857 |
| Pard6b    | 0.101508 | 0.863599 | 0.941857 |
| Nradd     | 0.070275 | 0.864386 | 0.942262 |
| Lin54     | 0.035267 | 0.864512 | 0.942262 |
| Fbxl14    | 0.021263 | 0.864524 | 0.942262 |
| Fbxo8     | 0.026581 | 0.86461  | 0.942262 |
| Ncapd2    | 0.074421 | 0.864645 | 0.942262 |
| Gm43793   | 0.040109 | 0.864852 | 0.942262 |
| Fam71e1   | 0.089985 | 0.865643 | 0.94274  |
| Gm7285    | 0.094499 | 0.865749 | 0.94274  |
| Mtmr6     | 0.017293 | 0.866443 | 0.943172 |
| Gm7616    | 0.283225 | 0.866531 | 0.943197 |
| Terf2ip   | 0.024108 | 0.866734 | 0.943208 |
| Tepsin    | 0.049505 | 0.86703  | 0.943399 |
| Ints11    | 0.027651 | 0.867235 | 0.943425 |
| Pop4      | 0.028692 | 0.867243 | 0.943425 |
| A430105J0 | 0.070399 | 0.867751 | 0.943774 |
| Sephs1    | 0.030947 | 0.868165 | 0.94384  |
| Gm48855   | 0.074822 | 0.868166 | 0.94384  |
| Gm32442   | 0.168335 | 0.86818  | 0.94384  |
| Nos1ap    | 0.06071  | 0.868192 | 0.94384  |
| Adam4     | 0.144565 | 0.868323 | 0.943869 |
| A330094K0 | 0.04735  | 0.868534 | 0.943869 |
| Pskh1     | 0.035509 | 0.868919 | 0.944213 |
| Rundc1    | 0.039612 | 0.869109 | 0.944213 |
| Zfhx2     | 0.039474 | 0.869166 | 0.944213 |
| Pygb      | 0.027719 | 0.870021 | 0.9448   |
| Tctn3     | 0.055674 | 0.870265 | 0.944895 |
| Hsd17b11  | 0.017514 | 0.870326 | 0.944895 |
| Lsm1      | 0.022249 | 0.870488 | 0.944895 |
| Gas1      | 0.06597  | 0.870658 | 0.945006 |
| Itgae     | 0.129486 | 0.870976 | 0.94522  |
| Selplg    | 0.149386 | 0.871301 | 0.945452 |
| Bmp3      | 0.099044 | 0.871413 | 0.945452 |
| Haus2     | 0.032102 | 0.871442 | 0.945452 |
| Grm5      | 0.168228 | 0.871995 | 0.945821 |
| Haus7     | 0.031648 | 0.87209  | 0.945821 |
| D130019J1 | 0.057593 | 0.872191 | 0.945821 |
| Maf1      | 0.016877 | 0.872224 | 0.945821 |
| Enkur     | 0.076392 | 0.872554 | 0.945994 |
| Rad52     | 0.046479 | 0.873213 | 0.946232 |
| Tmem141   | 0.039368 | 0.873497 | 0.946346 |

|           |          |          |          |
|-----------|----------|----------|----------|
| Exosc7    | 0.020544 | 0.873882 | 0.946658 |
| Ehmt1     | 0.016109 | 0.874055 | 0.946777 |
| Gm48966   | 0.143431 | 0.874122 | 0.946782 |
| Atp8b2    | 0.033253 | 0.874507 | 0.946922 |
| Gm29361   | 0.098967 | 0.874526 | 0.946922 |
| Polr2g    | 0.016136 | 0.874537 | 0.946922 |
| Efna1     | 0.018533 | 0.87479  | 0.947093 |
| Trim28    | 0.020579 | 0.87527  | 0.947228 |
| A730020Ei | 0.085167 | 0.875294 | 0.947228 |
| Gm37144   | 0.132967 | 0.875462 | 0.947228 |
| Ogn       | 0.029102 | 0.875546 | 0.947228 |
| Wdfy3     | 0.01451  | 0.875802 | 0.947284 |
| Paqr9     | 0.056769 | 0.876024 | 0.947402 |
| Gm38248   | 0.127265 | 0.876188 | 0.947413 |
| Gabra2    | 0.213328 | 0.876355 | 0.947417 |
| Zfp653    | 0.044314 | 0.876666 | 0.947549 |
| 2010204K  | 0.119175 | 0.876836 | 0.947577 |
| Ankrd49   | 0.033109 | 0.876885 | 0.947577 |
| Arl13b    | 0.020607 | 0.877052 | 0.947577 |
| Chd1l     | 0.035271 | 0.877121 | 0.947577 |
| D830036C  | 0.203485 | 0.877135 | 0.947577 |
| Camk2n2   | 0.056748 | 0.877297 | 0.947684 |
| Creld2    | 0.025298 | 0.877616 | 0.947748 |
| Ppp1r8    | 0.030742 | 0.877673 | 0.947748 |
| Srsf7     | 0.010442 | 0.877996 | 0.947821 |
| Josd2     | 0.02724  | 0.878148 | 0.947821 |
| Gm14091   | 0.068791 | 0.878273 | 0.947821 |
| Chrn2     | 0.123222 | 0.878312 | 0.947821 |
| Asf1b     | 0.141035 | 0.878317 | 0.947821 |
| Rsl1d1    | 0.016098 | 0.878352 | 0.947821 |
| Gm19337   | 0.071838 | 0.878374 | 0.947821 |
| AW20949   | 0.032048 | 0.878794 | 0.948137 |
| Gm43571   | 0.069234 | 0.879026 | 0.948281 |
| Zfp661    | 0.09692  | 0.879054 | 0.948281 |
| 1810044D  | 0.084618 | 0.87917  | 0.948304 |
| Mfsd2b    | 0.126578 | 0.879274 | 0.948314 |
| Esrrg     | 0.078375 | 0.879578 | 0.948388 |
| Tmem101   | 0.028614 | 0.879596 | 0.948388 |
| Gapdh     | 0.007618 | 0.88001  | 0.948697 |
| Chtf18    | 0.090447 | 0.880284 | 0.948701 |
| Nfatc1    | 0.030048 | 0.880302 | 0.948701 |
| Drd4      | 0.020112 | 0.880307 | 0.948701 |
| Qpctl     | 0.037085 | 0.880432 | 0.948701 |
| C130051F  | 0.052501 | 0.880477 | 0.948701 |
| Gm48699   | 0.14089  | 0.880506 | 0.948701 |
| ENSMUSG   | 0.102087 | 0.88075  | 0.948771 |
| Golgb1    | 0.012395 | 0.880775 | 0.948771 |

|           |          |          |          |
|-----------|----------|----------|----------|
| Plekhn2   | 0.026274 | 0.880888 | 0.94881  |
| Kcnip4    | 0.127635 | 0.881061 | 0.948846 |
| Tctn1     | 0.050406 | 0.881229 | 0.948846 |
| Tmem130   | 0.106969 | 0.881275 | 0.948846 |
| Mia3      | 0.012144 | 0.881745 | 0.948996 |
| Nme5      | 0.061059 | 0.882172 | 0.949319 |
| Adam32    | 0.243992 | 0.882311 | 0.949332 |
| Trafd1    | 0.016702 | 0.882914 | 0.949776 |
| Rbm48     | 0.025522 | 0.883054 | 0.949859 |
| Ranbp17   | 0.093807 | 0.883557 | 0.949962 |
| Ctdspl    | 0.019826 | 0.883599 | 0.949962 |
| Dmpk      | 0.040337 | 0.883812 | 0.950059 |
| Glb1l2    | 0.030175 | 0.884659 | 0.950765 |
| A330041J2 | 0.148652 | 0.884745 | 0.950771 |
| Arfgap1   | 0.025349 | 0.885617 | 0.951074 |
| Stx4a     | 0.014122 | 0.885685 | 0.951074 |
| Mbnl1     | 0.008631 | 0.885775 | 0.951074 |
| Pcolce    | 0.027218 | 0.885831 | 0.951074 |
| Adssl1    | 0.051093 | 0.886053 | 0.951074 |
| A730063M  | 0.047929 | 0.886108 | 0.951074 |
| Smpd3     | 0.089173 | 0.886112 | 0.951074 |
| Slc4a1ap  | 0.021935 | 0.886209 | 0.951074 |
| Phf11c    | 0.101864 | 0.886216 | 0.951074 |
| Gm37986   | 0.134808 | 0.886383 | 0.951107 |
| Dgat2     | 0.174341 | 0.886405 | 0.951107 |
| Slc6a11   | 0.047351 | 0.886461 | 0.951107 |
| Sirt2     | 0.014134 | 0.886677 | 0.951158 |
| Pcdhb18   | 0.065795 | 0.88674  | 0.951158 |
| Slx1b     | 0.025079 | 0.886889 | 0.951158 |
| Rnf138    | 0.019746 | 0.887006 | 0.951158 |
| Gtpbp10   | 0.036659 | 0.887057 | 0.951158 |
| 2900022M  | 0.124428 | 0.887122 | 0.951159 |
| Bmt2      | 0.022981 | 0.887724 | 0.951682 |
| Phgdh     | 0.070925 | 0.887737 | 0.951682 |
| 8430432A  | 0.143123 | 0.888167 | 0.951874 |
| Gm14021   | 0.122601 | 0.888725 | 0.952191 |
| Gm12184   | 0.060903 | 0.888836 | 0.952191 |
| Clcn4     | 0.015064 | 0.888952 | 0.952191 |
| Mphosph9  | 0.026363 | 0.888974 | 0.952191 |
| Ifi47     | 0.021242 | 0.889574 | 0.952629 |
| Zfp207    | 0.01181  | 0.890042 | 0.952851 |
| Gm43843   | 0.0663   | 0.890071 | 0.952851 |
| Lst1      | 0.049009 | 0.890116 | 0.952851 |
| Akap10    | 0.027558 | 0.890115 | 0.952851 |
| Gm10686   | 0.075485 | 0.890245 | 0.952851 |
| H2-Ke6    | 0.030931 | 0.890286 | 0.952851 |
| Atpaf1    | 0.024419 | 0.890579 | 0.952881 |

|           |          |          |          |
|-----------|----------|----------|----------|
| Nf2       | 0.019094 | 0.890692 | 0.952881 |
| Mdfic     | 0.023992 | 0.8907   | 0.952881 |
| Slc22a13b | 0.123561 | 0.890769 | 0.952886 |
| Wdtdc1    | 0.01995  | 0.890953 | 0.953015 |
| Gm9694    | 0.178682 | 0.891201 | 0.953118 |
| Camta2    | 0.022689 | 0.891277 | 0.953118 |
| Gm44901   | 0.082731 | 0.891301 | 0.953118 |
| Cops7a    | 0.016975 | 0.891518 | 0.953118 |
| A530017D  | 0.030753 | 0.891558 | 0.953118 |
| Asphd1    | 0.093741 | 0.891819 | 0.953124 |
| Cstf3     | 0.020809 | 0.892589 | 0.953789 |
| Galnt2    | 0.019406 | 0.892696 | 0.953789 |
| 4930524O  | 0.177411 | 0.892691 | 0.953789 |
| Pclaf     | 0.119309 | 0.893159 | 0.953916 |
| Lca5l     | 0.063176 | 0.893464 | 0.954133 |
| Smim13    | 0.019427 | 0.894074 | 0.954555 |
| Chd4      | 0.009043 | 0.894201 | 0.954555 |
| Rap2c     | 0.024265 | 0.894305 | 0.954555 |
| Lyl1      | 0.03194  | 0.894555 | 0.954617 |
| Tmem216   | 0.029891 | 0.894669 | 0.954671 |
| Phka1     | 0.034794 | 0.895169 | 0.954932 |
| Zfp459    | 0.213742 | 0.895231 | 0.954932 |
| Clcn3     | 0.011684 | 0.895606 | 0.954932 |
| Gm37183   | 0.043414 | 0.895616 | 0.954932 |
| Cyb5r1    | 0.016457 | 0.89625  | 0.955472 |
| Palb2     | 0.066632 | 0.89685  | 0.955919 |
| Crat      | 0.024045 | 0.896907 | 0.955919 |
| BC064078  | 0.025226 | 0.897099 | 0.955919 |
| Mapkapk5  | 0.048026 | 0.897185 | 0.955925 |
| Gm43256   | 0.075194 | 0.897745 | 0.956333 |
| Grid2     | 0.115805 | 0.898551 | 0.956686 |
| Gm42633   | 0.052718 | 0.898572 | 0.956686 |
| Arhgap12  | 0.018277 | 0.898687 | 0.956708 |
| Lias      | 0.018665 | 0.899178 | 0.957095 |
| Marveld3  | 0.064263 | 0.899365 | 0.957225 |
| AA465934  | 0.059308 | 0.899551 | 0.957251 |
| Zfp976    | 0.05778  | 0.899595 | 0.957251 |
| Pdcd5-ps  | 0.065777 | 0.899689 | 0.957251 |
| Plekha3   | 0.015346 | 0.899753 | 0.957251 |
| Nubp2     | 0.023028 | 0.899901 | 0.957251 |
| Clcn1     | 0.119317 | 0.900062 | 0.957328 |
| Gm43707   | 0.105038 | 0.900129 | 0.957328 |
| Mettl22   | 0.054054 | 0.900352 | 0.957395 |
| Sulf2     | 0.08674  | 0.900407 | 0.957395 |
| Nip7      | 0.01997  | 0.900826 | 0.957623 |
| AY036118  | 0.050757 | 0.901273 | 0.95795  |
| Scx       | 0.116618 | 0.901587 | 0.95811  |

|          |          |          |          |
|----------|----------|----------|----------|
| Tbc1d25  | 0.048301 | 0.901711 | 0.95811  |
| Acox3    | 0.022477 | 0.901732 | 0.95811  |
| Atg2a    | 0.025016 | 0.901851 | 0.958168 |
| Paf1     | 0.014754 | 0.90234  | 0.958348 |
| Gm10766  | 0.12029  | 0.903211 | 0.958722 |
| Gm38257  | 0.045834 | 0.903386 | 0.958722 |
| Col7a1   | 0.08653  | 0.903405 | 0.958722 |
| Hars     | 0.017229 | 0.903427 | 0.958722 |
| Col4a6   | 0.042393 | 0.903461 | 0.958722 |
| Igf2bp2  | 0.095668 | 0.904011 | 0.95891  |
| Cbfa2t2  | 0.024819 | 0.904086 | 0.95891  |
| Ercc4    | 0.024861 | 0.904271 | 0.958993 |
| Fam91a1  | 0.017723 | 0.904332 | 0.958993 |
| Gm45629  | 0.095523 | 0.904414 | 0.958993 |
| Memo1    | 0.01861  | 0.904441 | 0.958993 |
| Wscd1    | 0.02515  | 0.905154 | 0.959294 |
| Gm19327  | 0.069451 | 0.905409 | 0.959294 |
| Rad9a    | 0.030095 | 0.905684 | 0.95945  |
| Mrs2     | 0.019481 | 0.906186 | 0.959773 |
| Gm45378  | 0.174612 | 0.906231 | 0.959773 |
| Rad51d   | 0.031211 | 0.906326 | 0.959773 |
| Ro60     | 0.008928 | 0.906327 | 0.959773 |
| Tceal1   | 0.02079  | 0.906425 | 0.959773 |
| Pex1     | 0.029922 | 0.906543 | 0.959773 |
| Chek2    | 0.045168 | 0.906676 | 0.959773 |
| Cdon     | 0.034889 | 0.906713 | 0.959773 |
| Gm49064  | 0.135934 | 0.907038 | 0.959849 |
| Gm17597  | 0.189237 | 0.907164 | 0.959849 |
| Smn1     | 0.016424 | 0.907187 | 0.959849 |
| Lrp11    | 0.061662 | 0.907197 | 0.959849 |
| Sgpl1    | 0.028373 | 0.907215 | 0.959849 |
| Epb41l4b | 0.075542 | 0.908067 | 0.960352 |
| Zmynd19  | 0.034795 | 0.908075 | 0.960352 |
| Grpel2   | 0.026806 | 0.908302 | 0.960353 |
| Gm48161  | 0.120479 | 0.90831  | 0.960353 |
| Dgkeos   | 0.12544  | 0.908349 | 0.960353 |
| Rhoq     | 0.01494  | 0.908353 | 0.960353 |
| Slc16a6  | 0.021986 | 0.908657 | 0.960425 |
| Utp14b   | 0.018874 | 0.90895  | 0.960599 |
| Rap1gds1 | 0.012533 | 0.90906  | 0.960642 |
| Ier3ip1  | 0.009835 | 0.909119 | 0.960642 |
| Gm34411  | 0.233263 | 0.90949  | 0.960812 |
| Smim11   | 0.00982  | 0.909537 | 0.960812 |
| Ifi35    | 0.011017 | 0.909832 | 0.961023 |
| Epha2    | 0.021219 | 0.909865 | 0.961023 |
| Dcp1b    | 0.026563 | 0.910008 | 0.961099 |
| Gm5129   | 0.091221 | 0.910066 | 0.961099 |

|           |          |          |          |
|-----------|----------|----------|----------|
| Emc4      | 0.012035 | 0.910242 | 0.961126 |
| Simc1     | 0.036842 | 0.910263 | 0.961126 |
| Taco1os   | 0.064075 | 0.910284 | 0.961126 |
| Mrpl41    | 0.012176 | 0.911066 | 0.961545 |
| Smim12    | 0.013048 | 0.911343 | 0.96177  |
| Tbx18     | 0.031394 | 0.911614 | 0.961988 |
| Gtpbp6    | 0.019994 | 0.911791 | 0.962075 |
| Tm2d2     | 0.011095 | 0.911902 | 0.962075 |
| Vopp1     | 0.016684 | 0.91191  | 0.962075 |
| Cmtm5     | 0.07809  | 0.91238  | 0.962389 |
| Zfand6    | 0.008232 | 0.91267  | 0.962619 |
| E0300420  | 0.139449 | 0.912726 | 0.962619 |
| Nepro     | 0.038574 | 0.912811 | 0.962638 |
| Slc43a2   | 0.023122 | 0.913013 | 0.962638 |
| Bicra     | 0.02289  | 0.913056 | 0.962638 |
| Nr2c2ap   | 0.02211  | 0.913168 | 0.962638 |
| Ppp1r26   | 0.066491 | 0.913195 | 0.962638 |
| Nr1h4     | 0.109633 | 0.913329 | 0.962712 |
| Gm37017   | 0.102092 | 0.914109 | 0.963195 |
| Gm49705   | 0.045694 | 0.914246 | 0.963271 |
| Ndr3      | 0.011151 | 0.914412 | 0.963342 |
| Rnf125    | 0.011701 | 0.914649 | 0.963342 |
| Klf11     | 0.015083 | 0.914698 | 0.963342 |
| Efhc2     | 0.039852 | 0.915141 | 0.963672 |
| Loxl1     | 0.09989  | 0.915347 | 0.963821 |
| Gm26801   | 0.108943 | 0.915502 | 0.963849 |
| Nfya      | 0.019369 | 0.915982 | 0.964151 |
| Gtf2f1    | 0.015057 | 0.91612  | 0.964217 |
| Rmc1      | 0.028022 | 0.916174 | 0.964217 |
| Ubb-ps    | 0.018594 | 0.916487 | 0.964321 |
| Eme2      | 0.050012 | 0.916758 | 0.964487 |
| B4galt6   | 0.024851 | 0.917004 | 0.964487 |
| Parp2     | 0.016863 | 0.917086 | 0.964487 |
| Mlst8     | 0.029395 | 0.917253 | 0.964487 |
| Gm4890    | 0.050749 | 0.917268 | 0.964487 |
| Kpnb1     | 0.010484 | 0.917449 | 0.96461  |
| Trim7     | 0.059905 | 0.917703 | 0.964809 |
| Snap47    | 0.01645  | 0.917842 | 0.964888 |
| Plekha6   | 0.039653 | 0.918087 | 0.965073 |
| Rimbp2    | 0.104132 | 0.918524 | 0.965318 |
| Rnf31     | 0.018138 | 0.918729 | 0.965318 |
| 5930430LC | 0.020622 | 0.918763 | 0.965318 |
| Fam3a     | 0.015913 | 0.918846 | 0.965318 |
| Gm13625   | 0.059668 | 0.91897  | 0.965318 |
| Olfr46    | 0.125393 | 0.919025 | 0.965318 |
| Eif2a     | 0.013318 | 0.919512 | 0.965578 |
| Ftsj1     | 0.019924 | 0.919874 | 0.965735 |

|           |          |          |          |
|-----------|----------|----------|----------|
| Psmg2     | 0.015314 | 0.920277 | 0.965893 |
| Cx3cl1    | 0.012784 | 0.920336 | 0.965893 |
| D730044K  | 0.069537 | 0.920416 | 0.965893 |
| Arhgap33  | 0.041477 | 0.920551 | 0.965893 |
| Ppp1r15b  | 0.012812 | 0.920717 | 0.965893 |
| Fancm     | 0.033735 | 0.920754 | 0.965893 |
| Lasp1     | 0.008597 | 0.920763 | 0.965893 |
| Lactb2    | 0.019315 | 0.920772 | 0.965893 |
| Nol3      | 0.054125 | 0.921093 | 0.966076 |
| Pfas      | 0.030712 | 0.921166 | 0.966076 |
| Tmx3      | 0.009062 | 0.921329 | 0.966103 |
| Gphn      | 0.016297 | 0.921641 | 0.966103 |
| Dpm2      | 0.014706 | 0.921644 | 0.966103 |
| Zfp949    | 0.020733 | 0.921869 | 0.966271 |
| Acp2      | 0.017147 | 0.922223 | 0.966508 |
| Sgsm1     | 0.07878  | 0.922338 | 0.966508 |
| Fam177a   | 0.047158 | 0.922417 | 0.966508 |
| Gm48735   | 0.079426 | 0.922898 | 0.966809 |
| Plag1     | 0.040705 | 0.923448 | 0.967114 |
| Dnaaf2    | 0.058828 | 0.923657 | 0.967163 |
| Ephx3     | 0.036442 | 0.923846 | 0.967163 |
| Gm9392    | 0.066935 | 0.923892 | 0.967163 |
| Tiam2     | 0.154718 | 0.923947 | 0.967163 |
| Lrrc59    | 0.012997 | 0.92475  | 0.967444 |
| Gpr173    | 0.056332 | 0.924762 | 0.967444 |
| Gm5460    | 0.085967 | 0.924797 | 0.967444 |
| Gm47508   | 0.054562 | 0.924935 | 0.96752  |
| Pcdhga6   | 0.037649 | 0.925378 | 0.967916 |
| Gm45484   | 0.149913 | 0.925708 | 0.968194 |
| Bfar      | 0.010556 | 0.925929 | 0.968222 |
| Niban3    | 0.06707  | 0.926064 | 0.968235 |
| Gm37127   | 0.075753 | 0.926355 | 0.968262 |
| Shroom4   | 0.009971 | 0.927657 | 0.968823 |
| Med12     | 0.025449 | 0.927668 | 0.968823 |
| Anks6     | 0.051243 | 0.927733 | 0.968823 |
| Bola1     | 0.013404 | 0.927962 | 0.968927 |
| Gm19426   | 0.051071 | 0.928076 | 0.968955 |
| Cdc123    | 0.011896 | 0.928118 | 0.968955 |
| E430024I0 | 0.029139 | 0.9282   | 0.968973 |
| Fan1      | 0.036475 | 0.929087 | 0.969553 |
| Vcp-rs    | 0.055724 | 0.929281 | 0.969553 |
| Arhgef10  | 0.01106  | 0.929338 | 0.969553 |
| Stk25     | 0.009304 | 0.929703 | 0.96973  |
| Rmnd1     | 0.025603 | 0.929848 | 0.969761 |
| Spast     | 0.012468 | 0.931164 | 0.970519 |
| Taf4      | 0.015808 | 0.931166 | 0.970519 |
| Slc27a3   | 0.043424 | 0.931295 | 0.970519 |

|          |          |          |          |
|----------|----------|----------|----------|
| Elac2    | 0.028329 | 0.931501 | 0.970519 |
| Ssh2     | 0.009653 | 0.931629 | 0.970519 |
| Ccdc30   | 0.088732 | 0.931922 | 0.970519 |
| Dclre1a  | 0.024459 | 0.93205  | 0.970519 |
| Dhx15    | 0.007756 | 0.932057 | 0.970519 |
| Abcg4    | 0.030739 | 0.932139 | 0.970519 |
| Brat1    | 0.025169 | 0.932337 | 0.970519 |
| Bcl2l11  | 0.013136 | 0.93237  | 0.970519 |
| Pcca     | 0.01333  | 0.93239  | 0.970519 |
| Dedd2    | 0.01915  | 0.932392 | 0.970519 |
| Zfp772   | 0.036616 | 0.932613 | 0.970669 |
| Flad1    | 0.027053 | 0.932796 | 0.970793 |
| Mtcp1    | 0.025569 | 0.932971 | 0.970907 |
| Apeh     | 0.01521  | 0.933455 | 0.971168 |
| Zgrf1    | 0.033414 | 0.933482 | 0.971168 |
| Fem1c    | 0.010495 | 0.933803 | 0.971362 |
| Adh5     | 0.007563 | 0.933862 | 0.971362 |
| Hnrnpab  | 0.006218 | 0.933952 | 0.971388 |
| Gm9706   | 0.045237 | 0.934166 | 0.971476 |
| Irf3     | 0.010584 | 0.93446  | 0.971647 |
| Tbc1d22a | 0.015185 | 0.93481  | 0.971787 |
| Dlg5     | 0.016712 | 0.935098 | 0.971787 |
| Chst11   | 0.012031 | 0.935152 | 0.971787 |
| Vmn2r57  | 0.104978 | 0.93518  | 0.971787 |
| Gm13868  | 0.033204 | 0.935852 | 0.972165 |
| Ablim3   | 0.03102  | 0.935868 | 0.972165 |
| Pm20d2   | 0.104913 | 0.936022 | 0.972191 |
| Vps33b   | 0.021354 | 0.936152 | 0.972258 |
| Pkp2     | 0.042967 | 0.936279 | 0.972277 |
| Bcap29   | 0.013264 | 0.936522 | 0.972372 |
| Gm44196  | 0.038912 | 0.936884 | 0.972623 |
| Gm10702  | 0.065181 | 0.937084 | 0.972722 |
| Crybb2   | 0.018659 | 0.937164 | 0.972722 |
| Whrn     | 0.019555 | 0.937249 | 0.972722 |
| Gm5141   | 0.033907 | 0.937577 | 0.972928 |
| Dnaja3   | 0.012799 | 0.937768 | 0.973039 |
| Bop1     | 0.01925  | 0.937848 | 0.973039 |
| 4921534A | 0.124273 | 0.937946 | 0.973041 |
| Shroom1  | 0.013977 | 0.938018 | 0.973048 |
| Htra2    | 0.016006 | 0.938601 | 0.973379 |
| Herc2    | 0.007064 | 0.938785 | 0.973379 |
| Ilvbl    | 0.014397 | 0.938792 | 0.973379 |
| Tfcp2    | 0.016514 | 0.939314 | 0.97365  |
| Caly     | 0.04802  | 0.9394   | 0.973672 |
| Cblb     | 0.017086 | 0.939472 | 0.97368  |
| Psmb9    | 0.007389 | 0.93993  | 0.974019 |
| Gm48601  | 0.021793 | 0.940094 | 0.974067 |



|          |          |          |          |
|----------|----------|----------|----------|
| Arv1     | 0.035243 | 0.940545 | 0.974387 |
| Actr10   | 0.006283 | 0.940779 | 0.974427 |
| Gm37376  | 0.010505 | 0.940914 | 0.974499 |
| Zfp956   | 0.032144 | 0.941578 | 0.97512  |
| Gpr85    | 0.040258 | 0.941702 | 0.975145 |
| Gm42595  | 0.028589 | 0.941735 | 0.975145 |
| Asic3    | 0.079991 | 0.941798 | 0.975145 |
| Gprin1   | 0.057236 | 0.94217  | 0.975305 |
| Gm14827  | 0.069435 | 0.942204 | 0.975305 |
| Plxnb1   | 0.013893 | 0.942277 | 0.975305 |
| Tnfrsf22 | 0.027262 | 0.942278 | 0.975305 |
| Top1mt   | 0.025754 | 0.942452 | 0.975418 |
| Gm27030  | 0.064272 | 0.942692 | 0.975531 |
| Unkl     | 0.014369 | 0.943035 | 0.975818 |
| Gm11754  | 0.114437 | 0.94314  | 0.97586  |
| Dqx1     | 0.059235 | 0.943834 | 0.976173 |
| Tbl1x    | 0.006123 | 0.944148 | 0.976173 |
| Sec24d   | 0.012283 | 0.944301 | 0.976173 |
| Slc25a10 | 0.020131 | 0.944311 | 0.976173 |
| Adck2    | 0.021849 | 0.944421 | 0.976173 |
| Bri3bp   | 0.020199 | 0.944886 | 0.976535 |
| Apmmap   | 0.01099  | 0.945263 | 0.976707 |
| Slc35a3  | 0.011505 | 0.945516 | 0.976796 |
| Pik3ap1  | 0.097009 | 0.945788 | 0.976845 |
| Nmrk1    | 0.018131 | 0.946076 | 0.97694  |
| A730071L | 0.092113 | 0.946456 | 0.976946 |
| Crtc1    | 0.020111 | 0.946498 | 0.976946 |
| Ubxn7    | 0.009057 | 0.946697 | 0.977042 |
| Grik1    | 0.07501  | 0.947772 | 0.977841 |
| 4931440P | 0.020865 | 0.948232 | 0.978087 |
| Pfdn2    | 0.005164 | 0.949496 | 0.978985 |
| Zfp825   | 0.019074 | 0.949591 | 0.979017 |
| Zfyve9   | 0.007594 | 0.949772 | 0.979062 |
| Zfp937   | 0.025677 | 0.949785 | 0.979062 |
| 6330562C | 0.046885 | 0.950133 | 0.979238 |
| Gm43273  | 0.100198 | 0.951162 | 0.980232 |
| Mdp1     | 0.00808  | 0.951518 | 0.98028  |
| G6pc3    | 0.011586 | 0.951543 | 0.98028  |
| B230216N | 0.022467 | 0.951626 | 0.98028  |
| Gm4734   | 0.036449 | 0.951801 | 0.98028  |
| Neurl1b  | 0.021793 | 0.951823 | 0.98028  |
| Setd6    | 0.015781 | 0.951962 | 0.98028  |
| Shroom3  | 0.026117 | 0.952541 | 0.980614 |
| Psmb5    | 0.004999 | 0.952758 | 0.980674 |
| Hes5     | 0.02057  | 0.952771 | 0.980674 |
| Mrps9    | 0.008721 | 0.953041 | 0.980884 |
| Cgas     | 0.019558 | 0.953106 | 0.980884 |

|          |          |          |          |
|----------|----------|----------|----------|
| Asb4     | 0.012634 | 0.953299 | 0.980908 |
| Phlpp2   | 0.010527 | 0.953614 | 0.980955 |
| Wdr20    | 0.008458 | 0.953816 | 0.981031 |
| Kpna4    | 0.005412 | 0.953925 | 0.981031 |
| Gm36936  | 0.020645 | 0.954418 | 0.981425 |
| Zfp87    | 0.012229 | 0.954676 | 0.981556 |
| Sv2c     | 0.04212  | 0.955323 | 0.982085 |
| Gm44624  | 0.058324 | 0.955556 | 0.982103 |
| Nvl      | 0.008296 | 0.955603 | 0.982103 |
| Habp4    | 0.010103 | 0.955806 | 0.98211  |
| B230362B | 0.041616 | 0.955938 | 0.982165 |
| Wdr45    | 0.010448 | 0.95599  | 0.982165 |
| Zfp263   | 0.009788 | 0.956076 | 0.982186 |
| Ugdh     | 0.01005  | 0.956583 | 0.982403 |
| Gpr35    | 0.070522 | 0.957288 | 0.982744 |
| Chchd2   | 0.00224  | 0.957342 | 0.982744 |
| Eaf2     | 0.028311 | 0.95779  | 0.983069 |
| Xrcc2    | 0.02088  | 0.958094 | 0.983143 |
| Rab3il1  | 0.024215 | 0.958125 | 0.983143 |
| Aak1     | 0.005919 | 0.958387 | 0.983239 |
| Gm49768  | 0.041157 | 0.958499 | 0.983239 |
| Fam172a  | 0.007498 | 0.958504 | 0.983239 |
| Gm47234  | 0.024343 | 0.958567 | 0.983239 |
| Szt2     | 0.014031 | 0.959345 | 0.983784 |
| Ampd2    | 0.012812 | 0.959539 | 0.983853 |
| Ln timer | 0.009286 | 0.959613 | 0.983861 |
| Gm33373  | 0.066918 | 0.959686 | 0.983869 |
| Flrt1    | 0.029436 | 0.959814 | 0.983932 |
| Tmem41b  | 0.007706 | 0.960385 | 0.984294 |
| Dsel     | 0.009881 | 0.961448 | 0.984825 |
| Tagap1   | 0.015312 | 0.961607 | 0.984827 |
| Rabggta  | 0.012861 | 0.961764 | 0.984857 |
| Arl14ep  | 0.009501 | 0.961802 | 0.984857 |
| Huwe1    | 0.00364  | 0.961872 | 0.984857 |
| Ermp1    | 0.009226 | 0.962043 | 0.984857 |
| Tubg2    | 0.028845 | 0.962071 | 0.984857 |
| Armc7    | 0.016753 | 0.962097 | 0.984857 |
| Slc37a2  | 0.056041 | 0.962332 | 0.98492  |
| Ect2     | 0.048241 | 0.962433 | 0.984931 |
| Cldnd1   | 0.004608 | 0.962748 | 0.985119 |
| Ccnl2    | 0.003853 | 0.963095 | 0.985327 |
| Cyb5d1   | 0.023767 | 0.963152 | 0.985327 |
| Lig1     | 0.009089 | 0.96328  | 0.985327 |
| Lepr     | 0.013155 | 0.963424 | 0.985406 |
| Snrpf    | 0.004027 | 0.9637   | 0.98554  |
| Ift88    | 0.012935 | 0.963811 | 0.98554  |
| Cse1l    | 0.00734  | 0.963817 | 0.98554  |

|           |          |          |          |
|-----------|----------|----------|----------|
| Pcbp3     | 0.007224 | 0.964038 | 0.985609 |
| Mgat1     | 0.00536  | 0.964236 | 0.985609 |
| Snhg3     | 0.005229 | 0.96428  | 0.985609 |
| 2510039O  | 0.006246 | 0.964553 | 0.985687 |
| Pcdhga2   | 0.022692 | 0.964931 | 0.98587  |
| Zfyve27   | 0.007835 | 0.965079 | 0.985955 |
| Gm15460   | 0.03411  | 0.965295 | 0.986041 |
| Rhbdl3    | 0.019781 | 0.965402 | 0.986074 |
| 4931428F0 | 0.018378 | 0.965728 | 0.986235 |
| Med31     | 0.005359 | 0.965797 | 0.986235 |
| Stk36     | 0.020873 | 0.965815 | 0.986235 |
| Gm10767   | 0.034786 | 0.966039 | 0.986319 |
| Scube2    | 0.010104 | 0.966094 | 0.986319 |
| Pigv      | 0.011241 | 0.966446 | 0.986452 |
| Ntrk3     | 0.035586 | 0.966488 | 0.986452 |
| Gm45292   | 0.014262 | 0.966753 | 0.986602 |
| Mbp       | 0.021031 | 0.966768 | 0.986602 |
| Septin1   | 0.011609 | 0.966972 | 0.986744 |
| Fam72a    | 0.015562 | 0.967078 | 0.986785 |
| Cyp4f13   | 0.01011  | 0.96723  | 0.986872 |
| Mettl15   | 0.018102 | 0.967511 | 0.986984 |
| Ptcd1     | 0.010471 | 0.967601 | 0.986984 |
| Marchf2   | 0.003658 | 0.96762  | 0.986984 |
| P4ha2     | 0.00782  | 0.967792 | 0.986984 |
| Gm15607   | 0.029092 | 0.96786  | 0.986984 |
| Ube2q2    | 0.006154 | 0.967867 | 0.986984 |
| Aida      | 0.004408 | 0.968378 | 0.987317 |
| Cog8      | 0.006114 | 0.968575 | 0.987425 |
| Ints9     | 0.006598 | 0.968629 | 0.987425 |
| Poldip2   | 0.0055   | 0.969331 | 0.987551 |
| Galnt13   | 0.013679 | 0.969404 | 0.987551 |
| Supt3     | 0.01002  | 0.969493 | 0.987551 |
| Zfp13     | 0.014522 | 0.969509 | 0.987551 |
| Gnb4      | 0.003276 | 0.969517 | 0.987551 |
| Fxr1      | 0.003343 | 0.969717 | 0.987551 |
| Nr2f6     | 0.004892 | 0.96973  | 0.987551 |
| Trip4     | 0.005956 | 0.969788 | 0.987551 |
| Grk2      | 0.004201 | 0.969842 | 0.987551 |
| Ints4     | 0.008586 | 0.969971 | 0.987558 |
| Gm43329   | 0.012421 | 0.970013 | 0.987558 |
| 4930592C0 | 0.051378 | 0.970141 | 0.987566 |
| Wls       | 0.00392  | 0.970219 | 0.987566 |
| Npnt      | 0.013279 | 0.970994 | 0.987869 |
| Nptx2     | 0.056447 | 0.971036 | 0.987869 |
| Pgap4     | 0.006161 | 0.971288 | 0.987877 |
| Nudt18    | 0.007178 | 0.971439 | 0.987877 |
| Tgfb1i1   | 0.004541 | 0.971506 | 0.987877 |

|           |          |          |          |
|-----------|----------|----------|----------|
| Rnf40     | 0.00654  | 0.971645 | 0.987877 |
| Npr1      | 0.00673  | 0.971936 | 0.987972 |
| Tfg       | 0.004094 | 0.972157 | 0.988128 |
| Ssr2      | 0.003279 | 0.9726   | 0.98831  |
| Phf21b    | 0.010188 | 0.97262  | 0.98831  |
| 1700007L1 | 0.015767 | 0.972847 | 0.98831  |
| Alyref    | 0.00345  | 0.973135 | 0.988318 |
| Jmjd4     | 0.016459 | 0.973477 | 0.988415 |
| Basp1     | 0.005977 | 0.973495 | 0.988415 |
| Irs2      | 0.009123 | 0.973736 | 0.988593 |
| Riox1     | 0.008554 | 0.974016 | 0.988765 |
| Adap2os   | 0.007994 | 0.974037 | 0.988765 |
| Nsl1      | 0.038763 | 0.974271 | 0.988868 |
| Gm14227   | 0.018015 | 0.974513 | 0.989025 |
| Ddx47     | 0.004747 | 0.97477  | 0.989132 |
| Cacna1s   | 0.040078 | 0.975149 | 0.98936  |
| Haus5     | 0.009716 | 0.975285 | 0.98936  |
| Gba2      | 0.008614 | 0.975636 | 0.989515 |
| Suco      | 0.003696 | 0.975746 | 0.98956  |
| Msantd3   | 0.005902 | 0.976125 | 0.989765 |
| Kirrel3   | 0.026733 | 0.976335 | 0.989765 |
| Gm11914   | 0.017601 | 0.976351 | 0.989765 |
| Acy1      | 0.01185  | 0.976532 | 0.989765 |
| Ubqln4    | 0.006097 | 0.976569 | 0.989765 |
| 1700104B  | 0.05226  | 0.976589 | 0.989765 |
| Xrn1      | 0.002937 | 0.976609 | 0.989765 |
| Cyfp2     | 0.007375 | 0.977683 | 0.990518 |
| Polq      | 0.034359 | 0.977909 | 0.99068  |
| Zfp354b   | 0.013453 | 0.978434 | 0.990876 |
| Celf3     | 0.01461  | 0.978554 | 0.990884 |
| Creb1     | 0.00235  | 0.979343 | 0.991407 |
| Dennd11   | 0.005722 | 0.979355 | 0.991407 |
| Foxf1     | 0.005015 | 0.979622 | 0.991543 |
| Rhbdd2    | 0.004701 | 0.979752 | 0.991578 |
| Arcn1     | 0.002308 | 0.979882 | 0.991605 |
| Stmn3     | 0.010553 | 0.980214 | 0.991648 |
| Pex11b    | 0.003765 | 0.980298 | 0.991648 |
| Csnk2b    | 0.002061 | 0.980322 | 0.991648 |
| Gm47372   | 0.038232 | 0.980704 | 0.991967 |
| Tm7sf3    | 0.002527 | 0.981507 | 0.992511 |
| Slc29a4   | 0.00715  | 0.98167  | 0.992609 |
| 1700109H  | 0.011964 | 0.982009 | 0.992809 |
| Timm44    | 0.003196 | 0.982088 | 0.992809 |
| Nnt-1     | 0.011154 | 0.982645 | 0.992968 |
| Ndufb6    | 0.001993 | 0.982827 | 0.992972 |
| Gm17108   | 0.026497 | 0.982873 | 0.992972 |
| Gm37027   | 0.036226 | 0.98294  | 0.992972 |

|            |          |          |          |
|------------|----------|----------|----------|
| Drg2       | 0.004192 | 0.982958 | 0.992972 |
| Gm6542     | 0.011263 | 0.983198 | 0.993081 |
| Gm3081     | 0.008247 | 0.984247 | 0.993872 |
| Sult4a1    | 0.023925 | 0.984394 | 0.993932 |
| Atp11c     | 0.002406 | 0.984633 | 0.993997 |
| Lpar4      | 0.003604 | 0.984942 | 0.994085 |
| Eogt       | 0.001303 | 0.984984 | 0.994085 |
| Csgalnact2 | 0.002696 | 0.985713 | 0.994579 |
| Gm38036    | 0.005103 | 0.985887 | 0.994656 |
| Pald1      | 0.002661 | 0.986342 | 0.994915 |
| Vstm2l     | 0.014593 | 0.986859 | 0.995369 |
| Gk         | 0.00436  | 0.987318 | 0.995743 |
| Gm43200    | 0.006749 | 0.98745  | 0.995743 |
| Actr2      | 0.001277 | 0.987464 | 0.995743 |
| Polr3h     | 0.003429 | 0.987999 | 0.995947 |
| Gm20033    | 0.007474 | 0.988665 | 0.99625  |
| Naa30      | 0.002142 | 0.989153 | 0.996587 |
| Arrb1      | 0.002745 | 0.989272 | 0.996594 |
| Ikzf4      | 0.004858 | 0.990185 | 0.997447 |
| Tmem59l    | 0.005467 | 0.990363 | 0.997535 |
| 9230116N   | 0.004978 | 0.990533 | 0.997535 |
| Pigq       | 0.001865 | 0.991058 | 0.997535 |
| Mindy4     | 0.002943 | 0.991264 | 0.997535 |
| Cnga3      | 0.010575 | 0.991273 | 0.997535 |
| Acvr1      | 0.001427 | 0.991444 | 0.997641 |
| Parva      | 0.001241 | 0.991672 | 0.997804 |
| Rexo5      | 0.00507  | 0.9921   | 0.997966 |
| Urb2       | 0.003032 | 0.992245 | 0.99799  |
| Rcan2      | 0.00161  | 0.992257 | 0.99799  |
| Tmem126b   | 0.001564 | 0.992376 | 0.998041 |
| Med29      | 0.001181 | 0.992568 | 0.998101 |
| Rpain      | 0.001399 | 0.99273  | 0.99813  |
| Mfsd8      | 0.002082 | 0.993001 | 0.998153 |
| Zbed6      | 0.001039 | 0.993021 | 0.998153 |
| Grwd1      | 0.002712 | 0.99316  | 0.998153 |
| Lin52      | 0.002056 | 0.993281 | 0.998153 |
| Taf5       | 0.001705 | 0.993322 | 0.998153 |
| Reps1      | 0.001872 | 0.99338  | 0.998153 |
| Btbd6      | 0.002038 | 0.993476 | 0.998153 |
| Gm9752     | 0.004546 | 0.993637 | 0.998238 |
| Psmd7      | 0.000581 | 0.993708 | 0.998242 |
| Cenpx      | 0.000777 | 0.993996 | 0.998397 |
| Ascc2      | 0.001431 | 0.994264 | 0.998599 |
| Msl3l2     | 0.001783 | 0.994425 | 0.998694 |
| Lactb      | 0.000891 | 0.994637 | 0.998773 |
| Nrros      | 0.001773 | 0.994752 | 0.9988   |
| Arl3       | 0.000561 | 0.994855 | 0.9988   |

|           |           |          |          |
|-----------|-----------|----------|----------|
| Prss36    | 0.003219  | 0.994913 | 0.9988   |
| Sgsm2     | 0.001779  | 0.994944 | 0.9988   |
| Gm34121   | 0.006346  | 0.99518  | 0.9988   |
| Tinf2     | 0.001668  | 0.995198 | 0.9988   |
| Copb1     | 0.000572  | 0.99521  | 0.9988   |
| Bc1       | 0.005006  | 0.995272 | 0.9988   |
| Hyou1     | 0.001092  | 0.995544 | 0.99888  |
| Lemd2     | 0.000835  | 0.995627 | 0.998896 |
| Jarid2    | 0.000583  | 0.995942 | 0.999042 |
| Gm15879   | 0.004639  | 0.996109 | 0.999112 |
| Septin8   | 0.000358  | 0.997261 | 0.999666 |
| Arsg      | 0.001694  | 0.997385 | 0.999722 |
| 503343011 | 0.000785  | 0.997776 | 0.999913 |
| Caprin1   | 0.000184  | 0.998253 | 1        |
| Adcy2     | 0.00176   | 0.998463 | 1        |
| Gm19269   | 0.001991  | 0.998571 | 1        |
| Dot1l     | 0.000273  | 0.9986   | 1        |
| Zfp90     | 0.000359  | 0.998749 | 1        |
| Ppp2r3a   | 0.000198  | 0.998763 | 1        |
| 672042710 | 0.000208  | 0.999081 | 1        |
| Gm3055    | 0.000966  | 0.999117 | 1        |
| Gm42463   | 0.000998  | 0.999193 | 1        |
| Zc4h2     | 0.000219  | 0.999511 | 1        |
| Mocs3     | 0.000209  | 0.999531 | 1        |
| Megf8     | 6.04E-05  | 0.999698 | 1        |
| Gm47092   | 6.15E-05  | 0.999931 | 1        |
| Gm45694   | 0         | 1        | 1        |
| 2900002N  | 0         | 1        | 1        |
| Gm38230   | 0         | 1        | 1        |
| Gm18292   | 0         | 1        | 1        |
| Cdh18     | 0         | 1        | 1        |
| Gm43663   | 0         | 1        | 1        |
| Gm7278    | 0         | 1        | 1        |
| Gm50221   | 0         | 1        | 1        |
| Gm43665   | 0         | 1        | 1        |
| 49334110  | 0         | 1        | 1        |
| Gcdh      | -1.97E-05 | 0.999945 | 1        |
| Lancl3    | -7.68E-05 | 0.999733 | 1        |
| Sh3d21    | -9.83E-05 | 0.999725 | 1        |
| Nufip1    | -0.00013  | 0.999501 | 1        |
| Mterf4    | -0.00026  | 0.999051 | 1        |
| Gm37632   | -0.00117  | 0.998942 | 1        |
| Cnot9     | -0.0003   | 0.998819 | 1        |
| Dgat1     | -0.00039  | 0.998652 | 1        |
| Ccdc34    | -0.00036  | 0.997898 | 0.999968 |
| Ndufv3    | -0.00022  | 0.99761  | 0.999814 |
| Zfpm2     | -0.00257  | 0.997488 | 0.999758 |

|           |          |          |          |
|-----------|----------|----------|----------|
| Gm43544   | -0.00164 | 0.997263 | 0.999666 |
| Tars      | -0.00059 | 0.996959 | 0.999495 |
| Rlf       | -0.00047 | 0.996721 | 0.999324 |
| Pcdhgb5   | -0.002   | 0.996639 | 0.999309 |
| Abhd10    | -0.00079 | 0.996606 | 0.999309 |
| Gm5165    | -0.00117 | 0.99635  | 0.999153 |
| Unc5d     | -0.00429 | 0.996245 | 0.999115 |
| Gm10134   | -0.002   | 0.996183 | 0.999115 |
| Pias1     | -0.00051 | 0.995973 | 0.999042 |
| Mdm1      | -0.001   | 0.99571  | 0.998913 |
| Tstd2     | -0.00125 | 0.995398 | 0.9988   |
| Samm50    | -0.0007  | 0.99539  | 0.9988   |
| Dnhd1     | -0.00458 | 0.995214 | 0.9988   |
| Gm45203   | -0.00451 | 0.994548 | 0.99875  |
| Mpdu1     | -0.00131 | 0.993783 | 0.99825  |
| Rsph3a    | -0.00429 | 0.993486 | 0.998153 |
| Fam222a   | -0.00281 | 0.993292 | 0.998153 |
| Fgf11     | -0.00297 | 0.993027 | 0.998153 |
| 2700078Fc | -0.00817 | 0.992942 | 0.998153 |
| B3galt2   | -0.00461 | 0.99266  | 0.998126 |
| Slc25a46  | -0.00139 | 0.992441 | 0.998041 |
| Gm15663   | -0.00357 | 0.991999 | 0.997931 |
| Zfp958    | -0.00275 | 0.991956 | 0.997931 |
| Gm45354   | -0.00736 | 0.991765 | 0.99783  |
| Selenot   | -0.00087 | 0.991248 | 0.997535 |
| Acaca     | -0.00222 | 0.991154 | 0.997535 |
| Cpsf4     | -0.00254 | 0.991104 | 0.997535 |
| Shkbp1    | -0.0024  | 0.990995 | 0.997535 |
| Ankrd13d  | -0.00458 | 0.990994 | 0.997535 |
| Mmp11     | -0.00377 | 0.990943 | 0.997535 |
| Gm7546    | -0.00693 | 0.990875 | 0.997535 |
| AV039307  | -0.01265 | 0.990854 | 0.997535 |
| Trip11    | -0.00107 | 0.99072  | 0.997535 |
| Phyhipl   | -0.00348 | 0.99065  | 0.997535 |
| Zfp568    | -0.00377 | 0.989198 | 0.996587 |
| Eif2b3    | -0.0024  | 0.989176 | 0.996587 |
| Paxbp1    | -0.00218 | 0.988404 | 0.996054 |
| Pdss1     | -0.00595 | 0.988282 | 0.995999 |
| Ppm1d     | -0.00233 | 0.988275 | 0.995999 |
| Gm42822   | -0.00825 | 0.988174 | 0.995999 |
| Tmem230   | -0.0023  | 0.988031 | 0.995947 |
| Gm43766   | -0.00884 | 0.988023 | 0.995947 |
| Slc27a4   | -0.00385 | 0.988001 | 0.995947 |
| Nos2      | -0.00527 | 0.987916 | 0.995947 |
| Pink1     | -0.00132 | 0.987496 | 0.995743 |
| Cfap300   | -0.01495 | 0.986102 | 0.994739 |
| Zc3h12b   | -0.00815 | 0.986052 | 0.994739 |

|           |          |          |          |
|-----------|----------|----------|----------|
| Gm26590   | -0.01765 | 0.985744 | 0.994579 |
| Cntn4     | -0.01584 | 0.985656 | 0.994579 |
| 4833412C  | -0.00646 | 0.985442 | 0.994475 |
| Tug1      | -0.00226 | 0.984988 | 0.994085 |
| Gm43138   | -0.00844 | 0.984702 | 0.993997 |
| A930007A  | -0.01129 | 0.984702 | 0.993997 |
| Gria2     | -0.00835 | 0.984438 | 0.993932 |
| Chga      | -0.00835 | 0.984213 | 0.993872 |
| Gm38223   | -0.01681 | 0.984084 | 0.993841 |
| B230322F  | -0.01008 | 0.983332 | 0.993149 |
| Shc4      | -0.01338 | 0.983026 | 0.992975 |
| Alkbh6    | -0.00346 | 0.982688 | 0.992968 |
| Stag3     | -0.03325 | 0.982562 | 0.992968 |
| Celsr2    | -0.00817 | 0.982558 | 0.992968 |
| Dhdds     | -0.0036  | 0.982508 | 0.992968 |
| Blzf1     | -0.00418 | 0.982341 | 0.992953 |
| Kcnab3    | -0.0213  | 0.982133 | 0.992809 |
| Satb1     | -0.00822 | 0.982051 | 0.992809 |
| Slc22a17  | -0.00453 | 0.981402 | 0.992472 |
| Cdc42bpa  | -0.00186 | 0.980904 | 0.992035 |
| Med30     | -0.00317 | 0.980804 | 0.992002 |
| Akap1     | -0.00431 | 0.980315 | 0.991648 |
| Trap1     | -0.00458 | 0.980252 | 0.991648 |
| Klkb1     | -0.01561 | 0.980095 | 0.991648 |
| Gm43547   | -0.02027 | 0.97979  | 0.991578 |
| Syngap1   | -0.01399 | 0.979577 | 0.991543 |
| Adgra2    | -0.00246 | 0.978805 | 0.990984 |
| Ik        | -0.0022  | 0.978786 | 0.990984 |
| Gm47121   | -0.01011 | 0.978574 | 0.990884 |
| Ccdc58    | -0.0056  | 0.978274 | 0.990781 |
| Zfp64     | -0.0066  | 0.97827  | 0.990781 |
| Wrap73    | -0.00675 | 0.978121 | 0.990761 |
| Mios      | -0.00581 | 0.978052 | 0.990758 |
| Rps19-ps3 | -0.01365 | 0.977629 | 0.990518 |
| Tceanc    | -0.01202 | 0.977375 | 0.990339 |
| Map3k7    | -0.00462 | 0.97714  | 0.990169 |
| Trim32    | -0.00664 | 0.976787 | 0.989878 |
| Nexmif    | -0.00869 | 0.976527 | 0.989765 |
| Slf1      | -0.00536 | 0.976486 | 0.989765 |
| Cops2     | -0.00356 | 0.976179 | 0.989765 |
| Pou2f2    | -0.026   | 0.97549  | 0.989434 |
| Dip2c     | -0.00467 | 0.975386 | 0.989395 |
| 2810455O  | -0.03502 | 0.975242 | 0.98936  |
| Jag2      | -0.00249 | 0.975165 | 0.98936  |
| 5430403G  | -0.01074 | 0.974796 | 0.989132 |
| Chpt1     | -0.00411 | 0.974558 | 0.989025 |
| Cpeb1     | -0.0162  | 0.974269 | 0.988868 |



|           |          |          |          |
|-----------|----------|----------|----------|
| Lztf1     | -0.00427 | 0.973326 | 0.988377 |
| Ncs1      | -0.01916 | 0.973278 | 0.988377 |
| Smim19    | -0.00496 | 0.973118 | 0.988318 |
| Zfp9      | -0.00984 | 0.973055 | 0.988318 |
| Mfsd11    | -0.00781 | 0.973013 | 0.988318 |
| Mettl7a1  | -0.00641 | 0.972863 | 0.98831  |
| Prps1l3   | -0.00886 | 0.972755 | 0.98831  |
| Gm44291   | -0.01124 | 0.972682 | 0.98831  |
| Slc39a14  | -0.01385 | 0.972633 | 0.98831  |
| Trmt44    | -0.01115 | 0.972359 | 0.988267 |
| Lrp12     | -0.01404 | 0.971791 | 0.98789  |
| Pum2      | -0.00239 | 0.97175  | 0.98789  |
| Rasa3     | -0.01199 | 0.971605 | 0.987877 |
| AA413626  | -0.03829 | 0.971595 | 0.987877 |
| Ptbp1     | -0.00332 | 0.971485 | 0.987877 |
| E530011L2 | -0.00901 | 0.971176 | 0.987869 |
| 2610528A  | -0.02933 | 0.971144 | 0.987869 |
| Dipk2a    | -0.00884 | 0.971068 | 0.987869 |
| Mettl18   | -0.0101  | 0.970989 | 0.987869 |
| Mbd3      | -0.00334 | 0.97082  | 0.987869 |
| Gm45537   | -0.01149 | 0.970775 | 0.987869 |
| Fanci     | -0.01044 | 0.970759 | 0.987869 |
| Anapc4    | -0.00524 | 0.970548 | 0.987835 |
| Lin28a    | -0.03619 | 0.970214 | 0.987566 |
| Zmym4     | -0.00399 | 0.969873 | 0.987551 |
| Rai1      | -0.0055  | 0.969861 | 0.987551 |
| Psmg1     | -0.00736 | 0.969638 | 0.987551 |
| Slc7a5    | -0.0022  | 0.969177 | 0.987551 |
| Acp6      | -0.01307 | 0.968977 | 0.987511 |
| B3gnt9    | -0.01676 | 0.968877 | 0.987477 |
| Nop56     | -0.0062  | 0.968842 | 0.987477 |
| Gm47472   | -0.04078 | 0.968815 | 0.987477 |
| Gm45493   | -0.04238 | 0.968391 | 0.987317 |
| Akap11    | -0.00376 | 0.967973 | 0.987026 |
| Glt8d1    | -0.0067  | 0.967862 | 0.986984 |
| Hpgds     | -0.03584 | 0.96759  | 0.986984 |
| Gm42614   | -0.04782 | 0.966442 | 0.986452 |
| Gm19353   | -0.02963 | 0.966427 | 0.986452 |
| Lipt2     | -0.0166  | 0.965938 | 0.986294 |
| D930048N  | -0.0147  | 0.965459 | 0.986074 |
| AA914427  | -0.02441 | 0.96515  | 0.985959 |
| Gm47644   | -0.01272 | 0.96493  | 0.98587  |
| Ap3s2     | -0.00837 | 0.964914 | 0.98587  |
| 3222401L1 | -0.00664 | 0.964492 | 0.985687 |
| Ddhd2     | -0.00732 | 0.96438  | 0.985644 |
| Clock     | -0.00425 | 0.964154 | 0.985609 |
| Dhrs4     | -0.00844 | 0.964133 | 0.985609 |

|           |          |          |          |
|-----------|----------|----------|----------|
| Cox7b     | -0.00317 | 0.964073 | 0.985609 |
| Pex2      | -0.00705 | 0.963798 | 0.98554  |
| Mbtps2    | -0.00873 | 0.963231 | 0.985327 |
| Ythdc2    | -0.00896 | 0.963047 | 0.985327 |
| Ring1     | -0.00807 | 0.962499 | 0.984932 |
| Dcun1d5   | -0.00521 | 0.962356 | 0.98492  |
| Gm43259   | -0.01472 | 0.962277 | 0.98492  |
| 2810039B  | -0.02605 | 0.962073 | 0.984857 |
| Siglece   | -0.06035 | 0.96154  | 0.984825 |
| Fbrsl1    | -0.00713 | 0.961532 | 0.984825 |
| Gsta4     | -0.00603 | 0.961227 | 0.984707 |
| Gm48382   | -0.01626 | 0.961089 | 0.984633 |
| Orc6      | -0.008   | 0.960926 | 0.984534 |
| Gm36684   | -0.01899 | 0.960927 | 0.984534 |
| Rab3c     | -0.03189 | 0.960673 | 0.984409 |
| Ppp4r4    | -0.04239 | 0.960614 | 0.984409 |
| Supt16    | -0.0045  | 0.960429 | 0.984294 |
| Gm29994   | -0.04511 | 0.960379 | 0.984294 |
| Nsun5     | -0.01171 | 0.959928 | 0.983982 |
| Ttc5      | -0.00688 | 0.959406 | 0.983784 |
| Ubl4a     | -0.0078  | 0.959137 | 0.983642 |
| Pcmt1     | -0.00464 | 0.958678 | 0.983239 |
| Mvd       | -0.02239 | 0.958658 | 0.983239 |
| Ccdc65    | -0.03027 | 0.958561 | 0.983239 |
| Vps18     | -0.01339 | 0.957928 | 0.983076 |
| Slc33a1   | -0.01086 | 0.95789  | 0.983076 |
| Gm43274   | -0.02389 | 0.957738 | 0.983069 |
| Sh3bp5l   | -0.01064 | 0.957    | 0.982528 |
| Calr      | -0.00347 | 0.95684  | 0.982431 |
| Gm16759   | -0.04559 | 0.956804 | 0.982431 |
| Pgghg     | -0.01506 | 0.956682 | 0.982403 |
| A230051N  | -0.03789 | 0.956679 | 0.982403 |
| Lrrc24    | -0.03925 | 0.956578 | 0.982403 |
| Dus1l     | -0.01069 | 0.956563 | 0.982403 |
| Usp33     | -0.00652 | 0.956145 | 0.982189 |
| Gm45620   | -0.0647  | 0.955787 | 0.98211  |
| Dnajc6    | -0.02089 | 0.955671 | 0.982107 |
| Chaf1a    | -0.02376 | 0.955567 | 0.982103 |
| Zfp27     | -0.02084 | 0.955388 | 0.982085 |
| Gpr162    | -0.02578 | 0.955044 | 0.981866 |
| Dpysl4    | -0.01652 | 0.95463  | 0.981556 |
| Gm10039   | -0.04227 | 0.95397  | 0.981031 |
| 1700026J1 | -0.05568 | 0.9539   | 0.981031 |
| Rfc5      | -0.02086 | 0.953633 | 0.980955 |
| Yae1d1    | -0.00737 | 0.953456 | 0.980908 |
| Nfasc     | -0.01492 | 0.953446 | 0.980908 |
| Rnf141    | -0.00922 | 0.95339  | 0.980908 |

|           |          |          |          |
|-----------|----------|----------|----------|
| Cln3      | -0.01642 | 0.953244 | 0.980908 |
| Gm37084   | -0.02671 | 0.952581 | 0.980614 |
| Ccdc57    | -0.03699 | 0.952422 | 0.980585 |
| Arhgap35  | -0.00874 | 0.952266 | 0.980492 |
| Gm20517   | -0.05816 | 0.951995 | 0.98028  |
| Rasl11a   | -0.00932 | 0.951949 | 0.98028  |
| Mib2      | -0.0147  | 0.9519   | 0.98028  |
| Kctd8     | -0.04591 | 0.95164  | 0.98028  |
| Kcnc3     | -0.02713 | 0.951627 | 0.98028  |
| Foxn2     | -0.0087  | 0.951521 | 0.98028  |
| Zfp30     | -0.01368 | 0.949897 | 0.979062 |
| Rnf14     | -0.00694 | 0.949893 | 0.979062 |
| Cpsf3     | -0.01087 | 0.949351 | 0.978903 |
| Otx2      | -0.01111 | 0.949259 | 0.978876 |
| Arhgap27c | -0.04361 | 0.949154 | 0.978835 |
| Pdgfrl    | -0.02777 | 0.948953 | 0.978696 |
| Gm47246   | -0.04104 | 0.948769 | 0.978573 |
| Gm47870   | -0.07626 | 0.947994 | 0.977909 |
| Lpcat1    | -0.00849 | 0.947957 | 0.977909 |
| Susd3     | -0.01141 | 0.947798 | 0.977841 |
| Atxn3     | -0.0097  | 0.947697 | 0.977841 |
| 6030443JC | -0.0396  | 0.947626 | 0.977841 |
| Bcl2l12   | -0.01282 | 0.946861 | 0.977144 |
| Wrap53    | -0.02337 | 0.946539 | 0.976946 |
| Prpf38a   | -0.00824 | 0.946509 | 0.976946 |
| Enpp4     | -0.00795 | 0.946415 | 0.976946 |
| Tubb3     | -0.04466 | 0.946364 | 0.976946 |
| Terf2     | -0.00981 | 0.9462   | 0.976946 |
| Ercc5     | -0.00878 | 0.946017 | 0.97694  |
| Lrch2     | -0.02977 | 0.945894 | 0.976887 |
| Dnajc25   | -0.01402 | 0.945675 | 0.976796 |
| Gm43328   | -0.02767 | 0.945642 | 0.976796 |
| Gm6863    | -0.02362 | 0.945591 | 0.976796 |
| Gm37893   | -0.02723 | 0.945563 | 0.976796 |
| Nudt1     | -0.02265 | 0.945118 | 0.976624 |
| Gm44829   | -0.0249  | 0.945115 | 0.976624 |
| Txnrd2    | -0.02019 | 0.944901 | 0.976535 |
| Ncbp1     | -0.01179 | 0.944398 | 0.976173 |
| Gm43593   | -0.03672 | 0.944297 | 0.976173 |
| Wdr38     | -0.04869 | 0.944226 | 0.976173 |
| Fbxo30    | -0.01137 | 0.944173 | 0.976173 |
| Gm8557    | -0.04477 | 0.943983 | 0.976173 |
| Polr1f    | -0.00916 | 0.943868 | 0.976173 |
| Rps25-ps1 | -0.02282 | 0.943855 | 0.976173 |
| Btbd2     | -0.01138 | 0.943689 | 0.976173 |
| 9330020H  | -0.01726 | 0.943354 | 0.975946 |
| Mon1b     | -0.02048 | 0.943291 | 0.975946 |

|          |          |          |          |
|----------|----------|----------|----------|
| BC037704 | -0.04744 | 0.9426   | 0.975503 |
| Irak1    | -0.0072  | 0.942034 | 0.975305 |
| Uevld    | -0.02375 | 0.94076  | 0.974427 |
| Arl8b    | -0.00859 | 0.940664 | 0.974427 |
| Zfp366   | -0.00632 | 0.940342 | 0.974244 |
| Gm45051  | -0.02069 | 0.940106 | 0.974067 |
| Rabif    | -0.01407 | 0.939789 | 0.97394  |
| Slc23a2  | -0.01315 | 0.939282 | 0.97365  |
| Kbtbd3   | -0.01493 | 0.939239 | 0.97365  |
| Brwd1    | -0.00783 | 0.939232 | 0.97365  |
| Spata7   | -0.01419 | 0.938765 | 0.973379 |
| Gm47481  | -0.11456 | 0.938551 | 0.973379 |
| Zdhhc13  | -0.02728 | 0.93842  | 0.97333  |
| Spout1   | -0.01747 | 0.938333 | 0.973308 |
| Ppargc1b | -0.01707 | 0.937879 | 0.973039 |
| Gm15481  | -0.0428  | 0.937355 | 0.972765 |
| D930036K | -0.09647 | 0.937188 | 0.972722 |
| Mynn     | -0.01185 | 0.936893 | 0.972623 |
| Gm36952  | -0.091   | 0.936456 | 0.972371 |
| Rab27b   | -0.03053 | 0.936301 | 0.972277 |
| Aste1    | -0.0217  | 0.936022 | 0.972191 |
| Gm16062  | -0.04845 | 0.935645 | 0.972068 |
| Cep85l   | -0.01192 | 0.935548 | 0.972035 |
| Zcchc9   | -0.01132 | 0.935542 | 0.972035 |
| Plxna3   | -0.06434 | 0.935079 | 0.971787 |
| Gtf3c6   | -0.01128 | 0.935017 | 0.971787 |
| Gdap1l1  | -0.04769 | 0.934936 | 0.971787 |
| Gm9645   | -0.04012 | 0.934835 | 0.971787 |
| Sec24a   | -0.0143  | 0.934779 | 0.971787 |
| Dnal4    | -0.01505 | 0.934378 | 0.971629 |
| Ttc39c   | -0.02717 | 0.934072 | 0.971445 |
| Prmt7    | -0.01825 | 0.933714 | 0.971343 |
| Zfyve19  | -0.02121 | 0.933219 | 0.97103  |
| Gm38365  | -0.03055 | 0.933057 | 0.970929 |
| Fgd6     | -0.01161 | 0.932404 | 0.970519 |
| Nudt2    | -0.01464 | 0.932312 | 0.970519 |
| Ccdc127  | -0.01056 | 0.932042 | 0.970519 |
| Dhx16    | -0.01586 | 0.932019 | 0.970519 |
| Gm36371  | -0.04836 | 0.931929 | 0.970519 |
| Gm13112  | -0.10765 | 0.931912 | 0.970519 |
| Abi3bp   | -0.04001 | 0.931756 | 0.970519 |
| Gm12689  | -0.06266 | 0.931364 | 0.970519 |
| Gm13483  | -0.08626 | 0.931251 | 0.970519 |
| Ptp4a3   | -0.00607 | 0.931202 | 0.970519 |
| Il18bp   | -0.02582 | 0.931138 | 0.970519 |
| Ap1s1    | -0.01255 | 0.93109  | 0.970519 |
| Gm49300  | -0.0883  | 0.930485 | 0.970208 |

|          |          |          |          |
|----------|----------|----------|----------|
| Gm43488  | -0.10075 | 0.93043  | 0.970208 |
| Mcoln1   | -0.0184  | 0.930369 | 0.970208 |
| Gm20696  | -0.0222  | 0.929862 | 0.969761 |
| Zfat     | -0.03554 | 0.929623 | 0.969715 |
| Zfp28    | -0.03015 | 0.929459 | 0.969611 |
| Fads6    | -0.09329 | 0.929267 | 0.969553 |
| Btbd7    | -0.00593 | 0.929241 | 0.969553 |
| Arhgap4  | -0.08628 | 0.929179 | 0.969553 |
| Hells    | -0.03049 | 0.92902  | 0.969553 |
| 9430015G | -0.03458 | 0.928813 | 0.969478 |
| Crnde    | -0.02056 | 0.928589 | 0.969312 |
| Pex7     | -0.01631 | 0.927893 | 0.968922 |
| Lsr      | -0.00592 | 0.927644 | 0.968823 |
| Cul4b    | -0.01693 | 0.927604 | 0.968823 |
| A430027C | -0.02563 | 0.927554 | 0.968823 |
| Tamm41   | -0.02935 | 0.927528 | 0.968823 |
| A930001N | -0.02394 | 0.92745  | 0.968823 |
| Zfp276   | -0.02722 | 0.927325 | 0.968823 |
| Mypop    | -0.02305 | 0.927199 | 0.968823 |
| Rab5b    | -0.009   | 0.927049 | 0.968785 |
| Abhd13   | -0.01667 | 0.926864 | 0.968659 |
| Cda      | -0.06845 | 0.92667  | 0.968524 |
| Vav2     | -0.02873 | 0.926286 | 0.968258 |
| Bmp15    | -0.07865 | 0.9262   | 0.968235 |
| Ppp1ca   | -0.00688 | 0.926193 | 0.968235 |
| Nacad    | -0.04917 | 0.926097 | 0.968235 |
| Rngtt    | -0.0189  | 0.925902 | 0.968222 |
| Rpusd1   | -0.02555 | 0.925841 | 0.968222 |
| C730045N | -0.02919 | 0.924791 | 0.967444 |
| 1700037C | -0.03351 | 0.92475  | 0.967444 |
| Cacnb1   | -0.05269 | 0.924672 | 0.967444 |
| Tbrg4    | -0.02856 | 0.924321 | 0.967352 |
| Gm527    | -0.04542 | 0.924091 | 0.967178 |
| Nit1     | -0.01576 | 0.924049 | 0.967178 |
| Vps35l   | -0.01444 | 0.923763 | 0.967163 |
| Ibtk     | -0.0169  | 0.923738 | 0.967163 |
| Dab1     | -0.02636 | 0.923648 | 0.967163 |
| Rbm20    | -0.05188 | 0.923376 | 0.967106 |
| 4930579G | -0.03895 | 0.92321  | 0.967    |
| Cacul1   | -0.0148  | 0.922967 | 0.966813 |
| Gm26912  | -0.10553 | 0.922879 | 0.966809 |
| Ubxn4    | -0.00758 | 0.922699 | 0.966735 |
| Adora2a  | -0.01751 | 0.922407 | 0.966508 |
| Gm46350  | -0.0922  | 0.922126 | 0.966473 |
| Arhgap31 | -0.00554 | 0.921562 | 0.966103 |
| Gm11266  | -0.06875 | 0.921501 | 0.966103 |
| lqck     | -0.05318 | 0.921426 | 0.966103 |

|           |          |          |          |
|-----------|----------|----------|----------|
| Gm37472   | -0.04    | 0.921387 | 0.966103 |
| Cnot3     | -0.01143 | 0.921116 | 0.966076 |
| Srsf4     | -0.01019 | 0.920798 | 0.965893 |
| Mtmr12    | -0.01613 | 0.920526 | 0.965893 |
| Gm16523   | -0.04794 | 0.920453 | 0.965893 |
| Gm37553   | -0.08758 | 0.920195 | 0.965893 |
| 0610010K  | -0.01352 | 0.919681 | 0.965601 |
| Ndufa12-p | -0.04187 | 0.919641 | 0.965601 |
| Gm49260   | -0.08834 | 0.919531 | 0.965578 |
| Gm44647   | -0.08735 | 0.919349 | 0.965523 |
| Gm38082   | -0.04197 | 0.919151 | 0.965382 |
| Vps8      | -0.02317 | 0.919002 | 0.965318 |
| Neil1     | -0.0426  | 0.918933 | 0.965318 |
| Ncor1     | -0.00602 | 0.918778 | 0.965318 |
| Timm17b   | -0.0131  | 0.91833  | 0.965197 |
| Zdhhc21   | -0.01867 | 0.918147 | 0.965073 |
| Akr1b8    | -0.04377 | 0.917245 | 0.964487 |
| Wars      | -0.01498 | 0.91711  | 0.964487 |
| Golph3l   | -0.02008 | 0.917013 | 0.964487 |
| Tgm4      | -0.0889  | 0.916987 | 0.964487 |
| E130310I0 | -0.02552 | 0.91653  | 0.964321 |
| Sema4b    | -0.04869 | 0.916441 | 0.964321 |
| A930030B  | -0.1802  | 0.91634  | 0.964321 |
| Ccdc22    | -0.03281 | 0.915859 | 0.964089 |
| Kcne2     | -0.05992 | 0.915742 | 0.964033 |
| Nudt21    | -0.01321 | 0.915493 | 0.963849 |
| Hps5      | -0.02067 | 0.914915 | 0.963502 |
| Psmb6     | -0.00878 | 0.914641 | 0.963342 |
| Vhl       | -0.02051 | 0.914577 | 0.963342 |
| 6230400D  | -0.04127 | 0.914472 | 0.963342 |
| Gkap1     | -0.01046 | 0.91393  | 0.963074 |
| Fbxw7     | -0.01285 | 0.913818 | 0.963024 |
| Gm37333   | -0.03145 | 0.913593 | 0.962855 |
| Acbd7     | -0.05037 | 0.913499 | 0.962824 |
| Lin37     | -0.02021 | 0.913175 | 0.962638 |
| Orc4      | -0.0156  | 0.913135 | 0.962638 |
| Pitrm1    | -0.02648 | 0.912252 | 0.962322 |
| Gnaz      | -0.02487 | 0.911953 | 0.962075 |
| Sncg      | -0.01677 | 0.911021 | 0.961545 |
| 2310022A  | -0.02909 | 0.910933 | 0.961541 |
| Clcn6     | -0.02374 | 0.910732 | 0.961396 |
| Lockd     | -0.05849 | 0.91052  | 0.96124  |
| Scrt1     | -0.0874  | 0.910375 | 0.961155 |
| Gm42466   | -0.05717 | 0.909476 | 0.960812 |
| Bcs1l     | -0.03084 | 0.909326 | 0.960793 |
| Pttg1     | -0.00974 | 0.90888  | 0.960592 |
| Cxadr     | -0.04321 | 0.908633 | 0.960425 |

|         |          |          |          |
|---------|----------|----------|----------|
| Aagab   | -0.02538 | 0.908505 | 0.9604   |
| Gm4742  | -0.04151 | 0.908397 | 0.960353 |
| Gm37726 | -0.0688  | 0.907866 | 0.960266 |
| Gm35256 | -0.14902 | 0.907827 | 0.960266 |
| Gm4366  | -0.06742 | 0.907635 | 0.960158 |
| Camk1g  | -0.08379 | 0.907445 | 0.960025 |
| Mrps21  | -0.00979 | 0.906822 | 0.959773 |
| Ccdc28a | -0.033   | 0.906823 | 0.959773 |
| Zfp788  | -0.02208 | 0.906674 | 0.959773 |
| Ttc30a1 | -0.051   | 0.906481 | 0.959773 |
| Ei24    | -0.01203 | 0.906062 | 0.959773 |
| Rfesd   | -0.02683 | 0.905481 | 0.959302 |
| Gm37676 | -0.09041 | 0.905346 | 0.959294 |
| Tmod4   | -0.08963 | 0.905293 | 0.959294 |
| Armcx1  | -0.01782 | 0.905263 | 0.959294 |
| Nfx1    | -0.01474 | 0.905162 | 0.959294 |
| Ccne2   | -0.06367 | 0.905108 | 0.959294 |
| Aaas    | -0.03207 | 0.905019 | 0.959294 |
| Nhlrc1  | -0.05963 | 0.904988 | 0.959294 |
| Gtpbp4  | -0.01314 | 0.904581 | 0.959028 |
| Pabpn1  | -0.0138  | 0.904484 | 0.958993 |
| Ssc5d   | -0.14353 | 0.904055 | 0.95891  |
| Adi1    | -0.02564 | 0.90392  | 0.95891  |
| Dctn4   | -0.01098 | 0.903759 | 0.958835 |
| Gfpt1   | -0.0168  | 0.903715 | 0.958835 |
| Mrpl19  | -0.02459 | 0.903656 | 0.958835 |
| Runx1   | -0.04197 | 0.903322 | 0.958722 |
| Ophn1   | -0.0164  | 0.903288 | 0.958722 |
| Tppp    | -0.04756 | 0.903229 | 0.958722 |
| Gm12254 | -0.04401 | 0.903057 | 0.958722 |
| Meis3   | -0.04797 | 0.903053 | 0.958722 |
| Opn1sw  | -0.01823 | 0.902931 | 0.958722 |
| Fxr2    | -0.01633 | 0.902671 | 0.958632 |
| Gm37463 | -0.07416 | 0.902331 | 0.958348 |
| Rab24   | -0.01516 | 0.902188 | 0.958323 |
| Zfp282  | -0.02408 | 0.90199  | 0.958181 |
| Ppp4r3b | -0.01088 | 0.901955 | 0.958181 |
| Gm43652 | -0.07722 | 0.901681 | 0.95811  |
| Unc45a  | -0.0176  | 0.901325 | 0.95795  |
| Mfsd3   | -0.06555 | 0.900912 | 0.957646 |
| Snrnp40 | -0.01813 | 0.900795 | 0.957623 |
| Zfp148  | -0.01074 | 0.900492 | 0.957404 |
| Kctd13  | -0.03034 | 0.900419 | 0.957395 |
| Nrf1    | -0.01719 | 0.900164 | 0.957328 |
| Zscan12 | -0.0282  | 0.899859 | 0.957251 |
| Rprd2   | -0.01474 | 0.899785 | 0.957251 |
| Thoc5   | -0.0251  | 0.899739 | 0.957251 |

|           |          |          |          |
|-----------|----------|----------|----------|
| Dlc1      | -0.00759 | 0.89905  | 0.957026 |
| Smcr8     | -0.0343  | 0.898603 | 0.956686 |
| Fkbp1     | -0.03607 | 0.898562 | 0.956686 |
| Zfp948    | -0.02727 | 0.898133 | 0.956459 |
| Hif1an    | -0.02158 | 0.898037 | 0.956424 |
| Gm31105   | -0.04509 | 0.897888 | 0.956333 |
| Pcdhgb6   | -0.08123 | 0.897877 | 0.956333 |
| Mcmdbp    | -0.01507 | 0.897841 | 0.956333 |
| Srsf9     | -0.01084 | 0.897749 | 0.956333 |
| Ppp6r2    | -0.01975 | 0.897116 | 0.955919 |
| Siva1     | -0.01584 | 0.897099 | 0.955919 |
| Socs2     | -0.0165  | 0.897025 | 0.955919 |
| Dyrk2     | -0.01643 | 0.896421 | 0.955587 |
| Ppox      | -0.03186 | 0.895954 | 0.955225 |
| Med24     | -0.03061 | 0.895523 | 0.954932 |
| Gm37767   | -0.07259 | 0.89547  | 0.954932 |
| Coq4      | -0.04073 | 0.895423 | 0.954932 |
| Bcas2     | -0.01142 | 0.895414 | 0.954932 |
| Sphk2     | -0.03327 | 0.895352 | 0.954932 |
| Apbb1     | -0.02465 | 0.895196 | 0.954932 |
| Prkag3    | -0.12611 | 0.895123 | 0.954932 |
| ENSMUSG1  | -0.19787 | 0.894525 | 0.954617 |
| Gm37558   | -0.03704 | 0.894439 | 0.954617 |
| Idnk      | -0.01567 | 0.894305 | 0.954555 |
| Fdxacb1   | -0.04592 | 0.894267 | 0.954555 |
| Tomm40l   | -0.02675 | 0.893994 | 0.954555 |
| Mybl1     | -0.0522  | 0.893864 | 0.954492 |
| Sh3gl2    | -0.03337 | 0.893197 | 0.953916 |
| Pip5k1a   | -0.01657 | 0.893144 | 0.953916 |
| Sdccag8   | -0.03622 | 0.893061 | 0.953916 |
| Slc24a2   | -0.12074 | 0.893034 | 0.953916 |
| Cbx6      | -0.01381 | 0.892979 | 0.953916 |
| Aoc2      | -0.07387 | 0.892634 | 0.953789 |
| 1700112J1 | -0.15398 | 0.891766 | 0.953124 |
| Bbs2      | -0.02893 | 0.891745 | 0.953124 |
| Gm15952   | -0.0791  | 0.891639 | 0.953124 |
| Gm7467    | -0.06447 | 0.89146  | 0.953118 |
| Pip4p1    | -0.01908 | 0.891451 | 0.953118 |
| Becn1     | -0.01486 | 0.891348 | 0.953118 |
| Fbn1      | -0.08788 | 0.890595 | 0.952881 |
| Gdpgp1    | -0.04671 | 0.890577 | 0.952881 |
| Cklf      | -0.03502 | 0.890408 | 0.952881 |
| Macir     | -0.02003 | 0.89029  | 0.952851 |
| Fscn2     | -0.02896 | 0.890193 | 0.952851 |
| Zfp449    | -0.04397 | 0.88924  | 0.952339 |
| Slc2a3    | -0.06186 | 0.889132 | 0.952291 |
| Rnf216    | -0.01551 | 0.888885 | 0.952191 |



|            |          |          |          |
|------------|----------|----------|----------|
| Ranbp3     | -0.02262 | 0.888799 | 0.952191 |
| Gm47580    | -0.05883 | 0.888612 | 0.952191 |
| Rufy3      | -0.01719 | 0.888569 | 0.952191 |
| Ldb3       | -0.15019 | 0.88817  | 0.951874 |
| Mcm7       | -0.03614 | 0.888062 | 0.951874 |
| Gm9294     | -0.0578  | 0.887975 | 0.95187  |
| Gm12934    | -0.14333 | 0.887002 | 0.951158 |
| Zfp777     | -0.02949 | 0.886982 | 0.951158 |
| Msh6       | -0.03586 | 0.886891 | 0.951158 |
| Cops9      | -0.01072 | 0.886501 | 0.951107 |
| Napa       | -0.01511 | 0.886198 | 0.951074 |
| Slc25a51   | -0.0181  | 0.885888 | 0.951074 |
| Rassf10    | -0.0948  | 0.885862 | 0.951074 |
| Six6       | -0.03993 | 0.885771 | 0.951074 |
| Rpl27a-ps4 | -0.05622 | 0.885676 | 0.951074 |
| Ndrp4      | -0.07768 | 0.885606 | 0.951074 |
| Btln9      | -0.21629 | 0.88557  | 0.951074 |
| Gm4189     | -0.08882 | 0.885437 | 0.951074 |
| Crls1      | -0.02668 | 0.885193 | 0.951074 |
| A930006IC  | -0.03336 | 0.884791 | 0.950771 |
| Srp54a     | -0.03146 | 0.884645 | 0.950765 |
| Gm41757    | -0.22759 | 0.884109 | 0.950311 |
| Gm49413    | -0.09726 | 0.883657 | 0.949962 |
| Zfp454     | -0.09008 | 0.883592 | 0.949962 |
| Pomt2      | -0.03346 | 0.883586 | 0.949962 |
| Urgcp      | -0.02904 | 0.883547 | 0.949962 |
| Afdn       | -0.00861 | 0.883292 | 0.949962 |
| Vrk3       | -0.02144 | 0.88315  | 0.949893 |
| Srek1ip1   | -0.02173 | 0.882587 | 0.949493 |
| 4933406J1  | -0.2175  | 0.882534 | 0.949493 |
| Rufy2      | -0.02359 | 0.882235 | 0.949319 |
| Bloc1s4    | -0.02107 | 0.882007 | 0.94921  |
| Pank4      | -0.0339  | 0.881653 | 0.948965 |
| Mphosph8   | -0.01342 | 0.881614 | 0.948965 |
| Zfp652os   | -0.09572 | 0.881511 | 0.948949 |
| Tomm34     | -0.02292 | 0.881412 | 0.948911 |
| Ccdc174    | -0.01838 | 0.881289 | 0.948846 |
| Zfp174     | -0.07961 | 0.8812   | 0.948846 |
| Npl        | -0.09257 | 0.880938 | 0.94881  |
| Ttc8       | -0.02845 | 0.880748 | 0.948771 |
| Disp1      | -0.0538  | 0.88052  | 0.948701 |
| Cryzl1     | -0.01926 | 0.88041  | 0.948701 |
| Rab30      | -0.04224 | 0.880009 | 0.948697 |
| Gm49077    | -0.12227 | 0.879498 | 0.948388 |
| Gm38300    | -0.11032 | 0.879446 | 0.948388 |
| Nudcd1     | -0.03619 | 0.879202 | 0.948304 |
| Nme6       | -0.04371 | 0.878787 | 0.948137 |

|           |          |          |          |
|-----------|----------|----------|----------|
| Pex26     | -0.04318 | 0.878155 | 0.947821 |
| Gm13787   | -0.23414 | 0.878124 | 0.947821 |
| Mthfd2    | -0.06085 | 0.878044 | 0.947821 |
| Dnm2      | -0.01231 | 0.877673 | 0.947748 |
| Gm15542   | -0.06778 | 0.877515 | 0.947748 |
| Znhit2    | -0.03187 | 0.877445 | 0.947748 |
| Tab1      | -0.03806 | 0.877074 | 0.947577 |
| Polr1e    | -0.05909 | 0.87704  | 0.947577 |
| Ano2      | -0.0679  | 0.87661  | 0.947549 |
| Vldlr     | -0.02663 | 0.876418 | 0.947417 |
| Zfp955b   | -0.02643 | 0.876287 | 0.947413 |
| Eef1aknmt | -0.04954 | 0.876273 | 0.947413 |
| Asphd2    | -0.1585  | 0.87621  | 0.947413 |
| Strn      | -0.02705 | 0.875851 | 0.947284 |
| Prkra     | -0.02251 | 0.875705 | 0.947263 |
| Gon4l     | -0.02589 | 0.875645 | 0.947263 |
| Mrpl9     | -0.01948 | 0.875525 | 0.947228 |
| Arrdc2    | -0.03758 | 0.875435 | 0.947228 |
| Gm26749   | -0.12694 | 0.875413 | 0.947228 |
| Fbxo4     | -0.032   | 0.875182 | 0.947228 |
| Gm37941   | -0.09462 | 0.875011 | 0.947196 |
| Ep400     | -0.01418 | 0.874933 | 0.94718  |
| Ctnnbl1   | -0.02426 | 0.874569 | 0.946922 |
| Arhgef18  | -0.02926 | 0.874549 | 0.946922 |
| Ado       | -0.0328  | 0.87353  | 0.946346 |
| Particl   | -0.04141 | 0.873366 | 0.946304 |
| Tmem231   | -0.06161 | 0.873236 | 0.946232 |
| Actr1a    | -0.0179  | 0.873218 | 0.946232 |
| Ncaph2    | -0.02346 | 0.873095 | 0.946232 |
| Papss2    | -0.04924 | 0.87303  | 0.946232 |
| Alkbh1    | -0.02751 | 0.872975 | 0.946232 |
| Tank      | -0.03352 | 0.872845 | 0.946219 |
| Pter      | -0.06513 | 0.872574 | 0.945994 |
| Mn1       | -0.03108 | 0.872558 | 0.945994 |
| Dok4      | -0.02969 | 0.872224 | 0.945821 |
| AV099323  | -0.07865 | 0.87195  | 0.945821 |
| Traf3     | -0.03286 | 0.871571 | 0.945523 |
| Vps4b     | -0.01557 | 0.871367 | 0.945452 |
| Gabrr1    | -0.13247 | 0.870716 | 0.945006 |
| Elk1      | -0.04527 | 0.870478 | 0.944895 |
| Smim3     | -0.0307  | 0.870445 | 0.944895 |
| Gm43980   | -0.07771 | 0.870434 | 0.944895 |
| Rnf208    | -0.09757 | 0.870009 | 0.9448   |
| Mars1     | -0.03273 | 0.869938 | 0.9448   |
| Pet100    | -0.01847 | 0.869573 | 0.944519 |
| 2210016L2 | -0.01764 | 0.869284 | 0.944274 |
| Sapcd1    | -0.06703 | 0.869053 | 0.944213 |

|          |          |          |          |
|----------|----------|----------|----------|
| Ppp2r5e  | -0.01863 | 0.869017 | 0.944213 |
| Apc2     | -0.05527 | 0.868511 | 0.943869 |
| Ywhag    | -0.01798 | 0.868491 | 0.943869 |
| Gm17477  | -0.1176  | 0.868432 | 0.943869 |
| Gm8234   | -0.17001 | 0.868008 | 0.94384  |
| Ddx1     | -0.02046 | 0.867951 | 0.94384  |
| Gm43852  | -0.11219 | 0.867753 | 0.943774 |
| Gm9028   | -0.23566 | 0.867464 | 0.943597 |
| Gm14216  | -0.19041 | 0.86718  | 0.943425 |
| Polr3k   | -0.02477 | 0.866791 | 0.943208 |
| Ftsj3    | -0.03537 | 0.866655 | 0.943197 |
| Hectd4   | -0.02386 | 0.866613 | 0.943197 |
| Zfp219   | -0.03406 | 0.86637  | 0.943161 |
| Fh1      | -0.02452 | 0.866341 | 0.943161 |
| Gm37949  | -0.08227 | 0.866016 | 0.942913 |
| Cndp2    | -0.03028 | 0.865794 | 0.94274  |
| Gm44509  | -0.07225 | 0.8657   | 0.94274  |
| Gm38162  | -0.05728 | 0.865585 | 0.94274  |
| Upf1     | -0.02246 | 0.865317 | 0.942563 |
| Arpc4    | -0.01712 | 0.865144 | 0.942443 |
| Map7     | -0.02095 | 0.865058 | 0.942417 |
| Shisa9   | -0.08738 | 0.864822 | 0.942262 |
| Tecr     | -0.01315 | 0.86477  | 0.942262 |
| 1700066M | -0.05003 | 0.864684 | 0.942262 |
| Zscan26  | -0.01997 | 0.864591 | 0.942262 |
| Rbx1-ps  | -0.20924 | 0.864234 | 0.942262 |
| BC037039 | -0.12081 | 0.864029 | 0.94212  |
| Gm9887   | -0.05593 | 0.863983 | 0.94212  |
| Gm36955  | -0.1075  | 0.863796 | 0.942003 |
| Shld2    | -0.04464 | 0.863558 | 0.941857 |
| Fyco1    | -0.01333 | 0.863482 | 0.941857 |
| B230369F | -0.08618 | 0.863403 | 0.941857 |
| Zfp775   | -0.04743 | 0.863365 | 0.941857 |
| Gm42514  | -0.09466 | 0.863294 | 0.941857 |
| Atxn2    | -0.01854 | 0.862955 | 0.941771 |
| Baiap2   | -0.0203  | 0.862905 | 0.941771 |
| Sh3glb2  | -0.02164 | 0.862627 | 0.941619 |
| Mfn2     | -0.02428 | 0.86262  | 0.941619 |
| Xylb     | -0.14868 | 0.86243  | 0.941569 |
| Rbbp8    | -0.03452 | 0.862401 | 0.941569 |
| Gm49502  | -0.0666  | 0.862176 | 0.941569 |
| Rnmt     | -0.02819 | 0.861994 | 0.941569 |
| Stimate  | -0.03447 | 0.86155  | 0.941405 |
| Tmem143  | -0.05976 | 0.861257 | 0.941222 |
| Kcnh6    | -0.25384 | 0.861006 | 0.941154 |
| Gm15559  | -0.17626 | 0.860745 | 0.941143 |
| Acaa1b   | -0.07063 | 0.860603 | 0.941125 |

|          |          |          |          |
|----------|----------|----------|----------|
| Smg8     | -0.03828 | 0.860435 | 0.941011 |
| Cers4    | -0.01444 | 0.860346 | 0.940981 |
| Camk2n1  | -0.01407 | 0.860122 | 0.940806 |
| Tob1     | -0.01454 | 0.859989 | 0.940797 |
| Gm48581  | -0.19379 | 0.859932 | 0.940797 |
| Slc7a14  | -0.15931 | 0.859267 | 0.940297 |
| Slc29a2  | -0.07237 | 0.859248 | 0.940297 |
| Sgsm3    | -0.04427 | 0.858981 | 0.940297 |
| Ofd1     | -0.03935 | 0.858855 | 0.940244 |
| Glce     | -0.0346  | 0.858622 | 0.940195 |
| A430103D | -0.09102 | 0.85848  | 0.940108 |
| Cyth2    | -0.02021 | 0.85819  | 0.939902 |
| Zfp933   | -0.04598 | 0.858    | 0.939902 |
| Emc3     | -0.01727 | 0.857933 | 0.939902 |
| Gm37522  | -0.08177 | 0.857907 | 0.939902 |
| Tnfaip3  | -0.02773 | 0.857655 | 0.939902 |
| Timm29   | -0.03144 | 0.857514 | 0.939875 |
| Etfbkmt  | -0.08009 | 0.857461 | 0.939875 |
| Iars     | -0.03425 | 0.857385 | 0.939872 |
| 5430400D | -0.13198 | 0.857344 | 0.939872 |
| Gm48653  | -0.14667 | 0.857268 | 0.939872 |
| Gm37811  | -0.10243 | 0.857226 | 0.939872 |
| Trpm3    | -0.02957 | 0.857113 | 0.939872 |
| Atg9a    | -0.07202 | 0.857062 | 0.939872 |
| Plekhf2  | -0.02034 | 0.856943 | 0.939872 |
| Cfap53   | -0.13727 | 0.856895 | 0.939872 |
| Caskin1  | -0.07217 | 0.856844 | 0.939872 |
| Fam214b  | -0.0343  | 0.856175 | 0.939783 |
| Aco2     | -0.01629 | 0.855981 | 0.939639 |
| Magi3    | -0.01925 | 0.855811 | 0.939522 |
| Casp2    | -0.03756 | 0.855698 | 0.939467 |
| Gm30238  | -0.16921 | 0.855685 | 0.939467 |
| Synj2bp  | -0.0171  | 0.855679 | 0.939467 |
| Tchp     | -0.04722 | 0.85494  | 0.938979 |
| Yif1b    | -0.02109 | 0.854841 | 0.938979 |
| Ccdc167  | -0.03757 | 0.854507 | 0.938837 |
| Mbd1     | -0.02478 | 0.854421 | 0.938822 |
| Maml1d1  | -0.03825 | 0.854314 | 0.938774 |
| Phc3     | -0.01705 | 0.854268 | 0.938774 |
| Zfp382   | -0.08385 | 0.854109 | 0.938686 |
| Bfsp2    | -0.12787 | 0.854074 | 0.938686 |
| Ikbip    | -0.025   | 0.854065 | 0.938686 |
| Mrpl44   | -0.02968 | 0.853739 | 0.938486 |
| Pde3a    | -0.02993 | 0.853492 | 0.938284 |
| Otud5    | -0.02543 | 0.853487 | 0.938284 |
| Cntd1    | -0.17106 | 0.853449 | 0.938284 |
| Cnot2    | -0.02391 | 0.853162 | 0.938196 |

|           |          |          |          |
|-----------|----------|----------|----------|
| Myt1      | -0.0682  | 0.852954 | 0.938105 |
| Nup153    | -0.02579 | 0.852925 | 0.938105 |
| Tmem86b   | -0.12164 | 0.852662 | 0.938059 |
| Man1a2    | -0.01806 | 0.852507 | 0.938059 |
| Gm43288   | -0.2262  | 0.852389 | 0.938059 |
| Gm9750    | -0.31069 | 0.852014 | 0.938059 |
| Gm29394   | -0.15311 | 0.851759 | 0.938059 |
| Cux2      | -0.10481 | 0.851667 | 0.938059 |
| Polr3d    | -0.04242 | 0.850661 | 0.937442 |
| Ankrd27   | -0.03807 | 0.85001  | 0.936933 |
| Tob2      | -0.0175  | 0.849451 | 0.936523 |
| Zbtb39    | -0.04544 | 0.849409 | 0.936523 |
| Gm45185   | -0.31585 | 0.848861 | 0.936493 |
| Tubgcp4   | -0.03353 | 0.848601 | 0.936493 |
| Micu2     | -0.02525 | 0.848425 | 0.936493 |
| Zfhx4     | -0.09106 | 0.848018 | 0.93646  |
| Bcam      | -0.01272 | 0.847589 | 0.936193 |
| 4930458D  | -0.30629 | 0.847555 | 0.936193 |
| Rnaseh2a  | -0.04068 | 0.847552 | 0.936193 |
| Bbs7      | -0.03436 | 0.847509 | 0.936193 |
| Cyria     | -0.07134 | 0.847413 | 0.936193 |
| Rfxank    | -0.04804 | 0.847371 | 0.936193 |
| Tma16     | -0.04387 | 0.84708  | 0.936184 |
| Gm36839   | -0.11791 | 0.847003 | 0.936168 |
| Hs2st1    | -0.02505 | 0.846826 | 0.936041 |
| Ptgr2     | -0.03411 | 0.846549 | 0.936011 |
| Toe1      | -0.03998 | 0.846216 | 0.935781 |
| Lrrc66    | -0.15952 | 0.846163 | 0.935781 |
| Zfp493    | -0.14996 | 0.845955 | 0.935632 |
| Ufsp1     | -0.05249 | 0.845611 | 0.935556 |
| Hypk      | -0.02321 | 0.845545 | 0.935556 |
| Fkbp8     | -0.01621 | 0.845355 | 0.935451 |
| Ccdc187   | -0.22147 | 0.845335 | 0.935451 |
| Vps13a    | -0.02403 | 0.844733 | 0.935134 |
| Pus7l     | -0.10784 | 0.84463  | 0.935134 |
| Stx7      | -0.01975 | 0.844233 | 0.935039 |
| Gsto2     | -0.13401 | 0.843814 | 0.93485  |
| Atf1      | -0.0255  | 0.843556 | 0.934634 |
| Mfap3     | -0.02568 | 0.843482 | 0.934622 |
| Rabl6     | -0.02524 | 0.843417 | 0.934619 |
| Hey2      | -0.03697 | 0.843411 | 0.934619 |
| Zfp781    | -0.16855 | 0.843317 | 0.934619 |
| Mipol1    | -0.04192 | 0.842999 | 0.934445 |
| Isoc2a    | -0.07997 | 0.84272  | 0.934445 |
| Mau2      | -0.02184 | 0.842466 | 0.934326 |
| Bex4      | -0.0771  | 0.841021 | 0.933069 |
| 3300002I0 | -0.15126 | 0.840794 | 0.932955 |

|           |          |          |          |
|-----------|----------|----------|----------|
| Crkl      | -0.02633 | 0.840391 | 0.932716 |
| Gm43866   | -0.30798 | 0.840334 | 0.932716 |
| Gm48501   | -0.18614 | 0.840239 | 0.932716 |
| Spats2l   | -0.04908 | 0.840198 | 0.932716 |
| Pth1r     | -0.03258 | 0.84017  | 0.932716 |
| Ewsr1     | -0.01597 | 0.839905 | 0.932716 |
| 8030445P: | -0.2972  | 0.839892 | 0.932716 |
| Mrpl58    | -0.0233  | 0.839237 | 0.932196 |
| 2600002D  | -0.23422 | 0.839068 | 0.932077 |
| Zfp946    | -0.04089 | 0.838541 | 0.931906 |
| Ikzf5     | -0.02475 | 0.838486 | 0.931906 |
| Gm45110   | -0.10756 | 0.838406 | 0.931894 |
| Trim39    | -0.03788 | 0.838298 | 0.931843 |
| Pml       | -0.0355  | 0.838252 | 0.931843 |
| Prmt9     | -0.04986 | 0.838021 | 0.931674 |
| Gm6563    | -0.06442 | 0.837607 | 0.931352 |
| Clp1      | -0.04608 | 0.837296 | 0.931144 |
| Ago3      | -0.02701 | 0.836734 | 0.930672 |
| Thoc2l    | -0.0187  | 0.835837 | 0.930075 |
| Ubxn1     | -0.01378 | 0.835826 | 0.930075 |
| Lrrc40    | -0.053   | 0.835655 | 0.93001  |
| Iba57     | -0.11619 | 0.835454 | 0.929856 |
| Edc4      | -0.03641 | 0.834852 | 0.929324 |
| Trappc6b  | -0.01699 | 0.834796 | 0.929324 |
| Magix     | -0.05424 | 0.834737 | 0.929324 |
| Gm47122   | -0.11764 | 0.834722 | 0.929324 |
| Camk1     | -0.02312 | 0.834355 | 0.929185 |
| Cdc73     | -0.02152 | 0.834273 | 0.929163 |
| Gm20163   | -0.2643  | 0.834266 | 0.929163 |
| Mcm6      | -0.03505 | 0.834056 | 0.92906  |
| MIlf1     | -0.07084 | 0.833866 | 0.929056 |
| Txn2      | -0.01875 | 0.833348 | 0.92878  |
| Rnf8      | -0.03009 | 0.832569 | 0.928508 |
| Txnrd3    | -0.04181 | 0.832485 | 0.928484 |
| Stk40     | -0.02707 | 0.832384 | 0.928473 |
| Rtl6      | -0.07719 | 0.832343 | 0.928473 |
| Gng13     | -0.05536 | 0.832026 | 0.928317 |
| Cartpt    | -0.2081  | 0.831548 | 0.927853 |
| Gapvd1    | -0.0179  | 0.831519 | 0.927853 |
| L2hgdh    | -0.08353 | 0.831431 | 0.927853 |
| Prelid3b  | -0.03385 | 0.830727 | 0.927214 |
| Tmem145   | -0.07284 | 0.830385 | 0.927177 |
| Limk1     | -0.04791 | 0.830099 | 0.926927 |
| Rita1     | -0.08334 | 0.829966 | 0.926891 |
| Uqcr11    | -0.01177 | 0.829815 | 0.92685  |
| Cct4      | -0.01727 | 0.829335 | 0.926488 |
| Tln1      | -0.01453 | 0.829271 | 0.926486 |

|           |          |          |          |
|-----------|----------|----------|----------|
| Aard      | -0.30081 | 0.829235 | 0.926486 |
| Car7      | -0.09367 | 0.829134 | 0.926472 |
| C430039JC | -0.09766 | 0.828459 | 0.925786 |
| Dpp7      | -0.07841 | 0.828154 | 0.925653 |
| Ankrd42   | -0.18647 | 0.828029 | 0.925583 |
| Nme4      | -0.18778 | 0.827922 | 0.925532 |
| Prpf40b   | -0.03581 | 0.827839 | 0.92553  |
| Gm4925    | -0.30653 | 0.827683 | 0.925472 |
| Atg5      | -0.02853 | 0.827394 | 0.925287 |
| Dph7      | -0.05295 | 0.827045 | 0.925035 |
| Epm2a     | -0.06264 | 0.826405 | 0.924458 |
| Tox2      | -0.05682 | 0.826317 | 0.924428 |
| Slc5a6    | -0.07602 | 0.826138 | 0.924297 |
| Dcdc2b    | -0.18672 | 0.825725 | 0.924077 |
| Gm43378   | -0.11268 | 0.825245 | 0.923712 |
| Abl2      | -0.03488 | 0.825191 | 0.923712 |
| Vit       | -0.2477  | 0.825055 | 0.923706 |
| Gm5297    | -0.11848 | 0.82465  | 0.923322 |
| Ttl       | -0.04128 | 0.824567 | 0.923322 |
| Abcg2     | -0.0111  | 0.824486 | 0.923322 |
| Strada    | -0.05354 | 0.824453 | 0.923322 |
| Ythdf1    | -0.02695 | 0.824316 | 0.923293 |
| Gm44053   | -0.23808 | 0.823643 | 0.922829 |
| Dglucy    | -0.11014 | 0.823286 | 0.922622 |
| mt-Tt     | -0.17895 | 0.823071 | 0.92245  |
| Gm47664   | -0.06219 | 0.822899 | 0.922436 |
| Homer3    | -0.04009 | 0.822447 | 0.922166 |
| Gas8      | -0.05132 | 0.822237 | 0.922    |
| Mfsd14a   | -0.02581 | 0.822152 | 0.922    |
| Kansl2    | -0.03503 | 0.821269 | 0.921259 |
| Cabin1    | -0.03201 | 0.821269 | 0.921259 |
| Itfg2     | -0.04277 | 0.821124 | 0.921234 |
| Smad4     | -0.01917 | 0.821006 | 0.92117  |
| Txndc9    | -0.02292 | 0.820772 | 0.920977 |
| Taok3     | -0.02931 | 0.820704 | 0.920969 |
| Dvl3      | -0.03934 | 0.820414 | 0.920921 |
| Psmd2     | -0.02106 | 0.820146 | 0.920758 |
| Gm48889   | -0.10073 | 0.820109 | 0.920758 |
| BC049715  | -0.24816 | 0.820001 | 0.920758 |
| Metap2    | -0.016   | 0.819707 | 0.920674 |
| Wdr19     | -0.0714  | 0.819586 | 0.920674 |
| Gm49932   | -0.28106 | 0.819452 | 0.9206   |
| Timm17a   | -0.02188 | 0.819358 | 0.920564 |
| D830024N  | -0.2581  | 0.819351 | 0.920564 |
| Kif2a     | -0.02432 | 0.819101 | 0.920413 |
| Gm15937   | -0.14617 | 0.818853 | 0.920203 |
| Ccdc18    | -0.12706 | 0.818783 | 0.920194 |

|           |          |          |          |
|-----------|----------|----------|----------|
| Tmem160   | -0.02042 | 0.818609 | 0.920136 |
| Gm53012   | -0.08753 | 0.818463 | 0.920111 |
| Rps13-ps2 | -0.13537 | 0.818358 | 0.920062 |
| Col20a1   | -0.20815 | 0.817909 | 0.919694 |
| Gm45084   | -0.14406 | 0.817851 | 0.919694 |
| Atrip     | -0.05196 | 0.817821 | 0.919694 |
| 2210016F: | -0.05151 | 0.817756 | 0.919694 |
| Kcnc1     | -0.20175 | 0.817625 | 0.919651 |
| Cnpy3     | -0.03882 | 0.817539 | 0.919651 |
| Rcan3     | -0.03841 | 0.817503 | 0.919651 |
| 1110038F: | -0.02517 | 0.817489 | 0.919651 |
| Ccnh      | -0.0344  | 0.817408 | 0.919651 |
| Gm42942   | -0.28312 | 0.817025 | 0.919598 |
| Nme1      | -0.02458 | 0.816766 | 0.919495 |
| Slc11a2   | -0.05738 | 0.816601 | 0.919467 |
| 1110032A: | -0.0425  | 0.816182 | 0.919134 |
| Gm48369   | -0.13819 | 0.815946 | 0.918964 |
| lqcc      | -0.05951 | 0.815719 | 0.918888 |
| Gm48230   | -0.11595 | 0.814651 | 0.91803  |
| Sbno1     | -0.01884 | 0.814619 | 0.91803  |
| Ptpn13    | -0.07057 | 0.814372 | 0.917923 |
| Gm38034   | -0.09278 | 0.813953 | 0.917728 |
| Mif4gd    | -0.02533 | 0.813853 | 0.917684 |
| Arhgef26  | -0.04673 | 0.813435 | 0.917282 |
| Hlcs      | -0.03632 | 0.813347 | 0.917251 |
| Rhpn1     | -0.1017  | 0.812983 | 0.91717  |
| Med6      | -0.0355  | 0.812888 | 0.917157 |
| B4galnt1  | -0.16552 | 0.81283  | 0.917157 |
| Elfn1     | -0.0718  | 0.812834 | 0.917157 |
| R3hcc1l   | -0.04211 | 0.812765 | 0.917157 |
| Ccdc191   | -0.06515 | 0.812397 | 0.917078 |
| Plekha8   | -0.03747 | 0.812296 | 0.917034 |
| Setx      | -0.02534 | 0.81229  | 0.917034 |
| 1700087l2 | -0.38372 | 0.812214 | 0.917034 |
| Dtd1      | -0.0332  | 0.812089 | 0.917034 |
| Kdm2a     | -0.02104 | 0.812024 | 0.917034 |
| Scn2b     | -0.10902 | 0.811829 | 0.916943 |
| Cachd1    | -0.03436 | 0.811718 | 0.916933 |
| Gm28112   | -0.28666 | 0.81147  | 0.916792 |
| Tmod1     | -0.08929 | 0.811229 | 0.916619 |
| Abcd3     | -0.03407 | 0.811138 | 0.916619 |
| Chmp7     | -0.03757 | 0.810665 | 0.916367 |
| Ddb1      | -0.02033 | 0.810659 | 0.916367 |
| Taf4b     | -0.06637 | 0.809992 | 0.915813 |
| Gfod2     | -0.04772 | 0.809945 | 0.915813 |
| Tmem192   | -0.04775 | 0.8095   | 0.915534 |
| Gm37755   | -0.3335  | 0.809148 | 0.915274 |



|          |          |          |          |
|----------|----------|----------|----------|
| Nin      | -0.02912 | 0.809105 | 0.915274 |
| Mettl14  | -0.04869 | 0.808403 | 0.914845 |
| Tmeff1   | -0.02593 | 0.808211 | 0.914767 |
| Slc38a1  | -0.07915 | 0.807876 | 0.914526 |
| Fbxw9    | -0.05094 | 0.807725 | 0.914424 |
| Phaf1    | -0.05162 | 0.80767  | 0.914424 |
| Atg10    | -0.05211 | 0.807647 | 0.914424 |
| Map4k5   | -0.03267 | 0.807172 | 0.914213 |
| Xlr      | -0.06475 | 0.806774 | 0.91397  |
| Cox17    | -0.02075 | 0.806362 | 0.913918 |
| Gm10184  | -0.33856 | 0.805819 | 0.913371 |
| Vps11    | -0.03692 | 0.805806 | 0.913371 |
| Wiz      | -0.03869 | 0.805702 | 0.913371 |
| Stac3    | -0.18097 | 0.805046 | 0.912979 |
| Idh2     | -0.03215 | 0.805004 | 0.912979 |
| Acot6    | -0.15742 | 0.804485 | 0.91274  |
| Cers6    | -0.08259 | 0.804122 | 0.912553 |
| Vps13c   | -0.03397 | 0.804018 | 0.912504 |
| Zfp955a  | -0.07375 | 0.804009 | 0.912504 |
| Snhg15   | -0.08149 | 0.803848 | 0.912504 |
| Cox16    | -0.04708 | 0.803642 | 0.912424 |
| Hnrnpdl  | -0.01838 | 0.803031 | 0.911945 |
| Lrch1    | -0.02989 | 0.802833 | 0.911853 |
| Perp     | -0.03783 | 0.802253 | 0.911399 |
| Pgbd5    | -0.20961 | 0.801767 | 0.910986 |
| Spata48  | -0.41127 | 0.801206 | 0.910693 |
| Sema4c   | -0.03424 | 0.800991 | 0.910571 |
| AW14615  | -0.08367 | 0.80049  | 0.910225 |
| 4833420G | -0.02838 | 0.800251 | 0.910083 |
| Abhd5    | -0.038   | 0.800253 | 0.910083 |
| Gm42722  | -0.4174  | 0.800046 | 0.910066 |
| Gm42728  | -0.14751 | 0.799922 | 0.909994 |
| Gm19605  | -0.14582 | 0.799778 | 0.909899 |
| Fads1    | -0.04423 | 0.799688 | 0.909866 |
| Arfip2   | -0.04197 | 0.7995   | 0.909776 |
| Tgoln1   | -0.01973 | 0.799408 | 0.909755 |
| Gm20337  | -0.24503 | 0.799208 | 0.909596 |
| AA474408 | -0.15313 | 0.798914 | 0.9094   |
| Rab40c   | -0.04945 | 0.7988   | 0.90934  |
| Bckdha   | -0.03805 | 0.798741 | 0.90934  |
| 4933429O | -0.37847 | 0.798676 | 0.909337 |
| Ywhae    | -0.0131  | 0.798363 | 0.909118 |
| Mdm4     | -0.02699 | 0.798145 | 0.90894  |
| Selenbp1 | -0.05498 | 0.797753 | 0.908563 |
| Gm27003  | -0.18759 | 0.796981 | 0.908029 |
| Nav3     | -0.25269 | 0.796883 | 0.907991 |
| Ube3c    | -0.03383 | 0.796819 | 0.907991 |

|           |          |          |          |
|-----------|----------|----------|----------|
| BC024978  | -0.1039  | 0.796796 | 0.907991 |
| Spag1     | -0.09397 | 0.796102 | 0.907648 |
| Ccnj      | -0.08755 | 0.795986 | 0.907648 |
| Aamd      | -0.02867 | 0.795769 | 0.907477 |
| Gm43737   | -0.14722 | 0.79575  | 0.907477 |
| Ppp3r1    | -0.02832 | 0.795561 | 0.907377 |
| Surf6     | -0.05897 | 0.795379 | 0.907238 |
| Vps52     | -0.0413  | 0.795319 | 0.907238 |
| Sp110     | -0.04266 | 0.794248 | 0.906432 |
| Parp1     | -0.04254 | 0.794122 | 0.906357 |
| Nkiras1   | -0.04552 | 0.793653 | 0.906047 |
| Rsrc1     | -0.03125 | 0.793071 | 0.905641 |
| Gm43628   | -0.09999 | 0.792996 | 0.905641 |
| 1700086O  | -0.10811 | 0.792837 | 0.905582 |
| Gm47690   | -0.18801 | 0.79226  | 0.905237 |
| Exosc1    | -0.0368  | 0.792163 | 0.905237 |
| Lonrf1    | -0.07812 | 0.792025 | 0.905206 |
| Klhl29    | -0.14284 | 0.791773 | 0.905125 |
| Fbxo10    | -0.07927 | 0.791518 | 0.904972 |
| Greb1     | -0.16914 | 0.791153 | 0.904761 |
| Gpr19     | -0.12997 | 0.791031 | 0.90476  |
| Atp5md    | -0.01764 | 0.790942 | 0.904728 |
| Snrnp35   | -0.06293 | 0.790866 | 0.90471  |
| Hsbp1l1   | -0.07953 | 0.790858 | 0.90471  |
| Gm42991   | -0.11708 | 0.790476 | 0.904541 |
| Rcl1      | -0.07143 | 0.789858 | 0.903972 |
| Vcpkmt    | -0.06449 | 0.789601 | 0.903939 |
| Mbip      | -0.04573 | 0.789206 | 0.903708 |
| Gm37255   | -0.11226 | 0.789085 | 0.903639 |
| Fam120a   | -0.02311 | 0.788972 | 0.903639 |
| Tmem41a   | -0.06969 | 0.788936 | 0.903639 |
| Tmem240   | -0.0942  | 0.788872 | 0.903639 |
| Phf12     | -0.03154 | 0.78887  | 0.903639 |
| Srd5a3    | -0.06567 | 0.788728 | 0.903639 |
| Polr3e    | -0.06259 | 0.788692 | 0.903639 |
| Synpo2    | -0.03325 | 0.788485 | 0.903639 |
| Crtap     | -0.02288 | 0.788185 | 0.903462 |
| Il17rd    | -0.03618 | 0.787909 | 0.903399 |
| 1300014J1 | -0.18546 | 0.787493 | 0.903195 |
| Gm18029   | -0.19991 | 0.787052 | 0.90283  |
| Sufu      | -0.05367 | 0.786177 | 0.90245  |
| Sin3a     | -0.0324  | 0.786012 | 0.902329 |
| Coa3      | -0.02456 | 0.785862 | 0.902226 |
| Tmem45a   | -0.07433 | 0.785842 | 0.902226 |
| Gm7324    | -0.19412 | 0.785754 | 0.902226 |
| Champ1    | -0.05408 | 0.785571 | 0.9021   |
| Plekhn1   | -0.10438 | 0.785093 | 0.901619 |

|           |          |          |          |
|-----------|----------|----------|----------|
| Thada     | -0.07266 | 0.784951 | 0.901526 |
| Abcb7     | -0.05316 | 0.784391 | 0.90109  |
| Hnrnpa3   | -0.01528 | 0.784278 | 0.90109  |
| Btrc      | -0.04579 | 0.783706 | 0.90068  |
| Gm44695   | -0.17874 | 0.782724 | 0.899865 |
| Ddit3     | -0.03841 | 0.782696 | 0.899865 |
| Ccl9      | -0.36605 | 0.782592 | 0.899852 |
| Tbp       | -0.04909 | 0.782482 | 0.899842 |
| Crif1     | -0.17108 | 0.782138 | 0.899675 |
| Cfap74    | -0.21078 | 0.781862 | 0.899612 |
| Gnptg     | -0.04253 | 0.781686 | 0.8995   |
| Gm49602   | -0.05989 | 0.781647 | 0.8995   |
| Polrmt    | -0.08125 | 0.781612 | 0.8995   |
| Gm13570   | -0.17154 | 0.781402 | 0.8995   |
| Stx5a     | -0.02899 | 0.781401 | 0.8995   |
| Crppa     | -0.16594 | 0.780925 | 0.899371 |
| Swt1      | -0.0284  | 0.780526 | 0.898995 |
| Sorcs1    | -0.10806 | 0.780406 | 0.898968 |
| Gm13423   | -0.18305 | 0.780311 | 0.898955 |
| Gm15535   | -0.30811 | 0.780012 | 0.898679 |
| Gpat3     | -0.24672 | 0.779699 | 0.898525 |
| Serping1  | -0.04226 | 0.779592 | 0.898473 |
| Med21     | -0.02582 | 0.779518 | 0.898456 |
| Sap30     | -0.04892 | 0.778893 | 0.898012 |
| Grin1     | -0.3471  | 0.778693 | 0.89799  |
| Dars2     | -0.08303 | 0.778538 | 0.89788  |
| Ube4bos1  | -0.15938 | 0.778335 | 0.897715 |
| Ccnq      | -0.04616 | 0.778048 | 0.897557 |
| Gm45220   | -0.07489 | 0.777614 | 0.897298 |
| A930007I1 | -0.25395 | 0.777438 | 0.897164 |
| Gstcd     | -0.09219 | 0.777401 | 0.897164 |
| Nexn      | -0.11352 | 0.777343 | 0.897164 |
| 6330408M  | -0.15395 | 0.777217 | 0.897139 |
| Prim1     | -0.09306 | 0.776961 | 0.896959 |
| Ndufs1    | -0.03883 | 0.77669  | 0.896716 |
| 2810405F1 | -0.12583 | 0.776505 | 0.89664  |
| Cep20     | -0.0409  | 0.775904 | 0.896194 |
| Tmem167I  | -0.04489 | 0.775863 | 0.896194 |
| B130024G  | -0.07809 | 0.775803 | 0.896194 |
| Ftx       | -0.1082  | 0.775104 | 0.895644 |
| Fam168b   | -0.02871 | 0.774904 | 0.895551 |
| Zfp300    | -0.11754 | 0.774796 | 0.895551 |
| Brpf1     | -0.04459 | 0.774769 | 0.895551 |
| Cryba2    | -0.15191 | 0.774706 | 0.895551 |
| Mad1I1    | -0.06872 | 0.774577 | 0.895518 |
| F630040K1 | -0.13943 | 0.774439 | 0.895429 |
| D830025C  | -0.12694 | 0.773997 | 0.895194 |

|           |          |          |          |
|-----------|----------|----------|----------|
| Mospd2    | -0.03644 | 0.773501 | 0.894758 |
| Luc7l     | -0.03067 | 0.773454 | 0.894758 |
| Gm38375   | -0.19619 | 0.773233 | 0.894725 |
| Gm29560   | -0.14925 | 0.773221 | 0.894725 |
| 5033417F1 | -0.24076 | 0.772429 | 0.894278 |
| Xrcc6     | -0.07844 | 0.772272 | 0.894262 |
| Ten1      | -0.06459 | 0.772097 | 0.894209 |
| Ndc1      | -0.09557 | 0.772055 | 0.894209 |
| A230083N  | -0.23923 | 0.771586 | 0.893924 |
| Prkag1    | -0.03673 | 0.771468 | 0.893924 |
| Atp5j2    | -0.01517 | 0.770954 | 0.89363  |
| Chmp2a    | -0.01887 | 0.77073  | 0.893555 |
| Gm38097   | -0.33898 | 0.770433 | 0.893349 |
| Gpatch11  | -0.03974 | 0.770202 | 0.89322  |
| Hecw1     | -0.29742 | 0.770033 | 0.893162 |
| Sesn2     | -0.11203 | 0.769776 | 0.893072 |
| Prelid3a  | -0.27487 | 0.7696   | 0.89297  |
| Fbxo31    | -0.06048 | 0.769059 | 0.892517 |
| Rpgrip1l  | -0.08653 | 0.769029 | 0.892517 |
| Usp8      | -0.03393 | 0.768858 | 0.892482 |
| BC030343  | -0.40721 | 0.768236 | 0.892064 |
| Sbsn      | -0.41559 | 0.768125 | 0.892064 |
| Taz       | -0.03577 | 0.768006 | 0.892064 |
| Mdm2      | -0.03806 | 0.76786  | 0.892064 |
| Ap2b1     | -0.0273  | 0.767471 | 0.891779 |
| H4c3      | -0.13278 | 0.76738  | 0.891779 |
| Gckr      | -0.11824 | 0.7673   | 0.891779 |
| Ripk4     | -0.24906 | 0.766979 | 0.891485 |
| Gm48768   | -0.1074  | 0.766847 | 0.8914   |
| Rxrb      | -0.04072 | 0.766796 | 0.8914   |
| Qdpr      | -0.03195 | 0.766019 | 0.890852 |
| Gm43622   | -0.25797 | 0.765947 | 0.890852 |
| Ets2      | -0.02677 | 0.765762 | 0.890836 |
| Stard8    | -0.02873 | 0.765609 | 0.890836 |
| Soga3     | -0.21543 | 0.765442 | 0.890836 |
| Gnl3l     | -0.04054 | 0.765381 | 0.890836 |
| AU022252  | -0.05488 | 0.76521  | 0.890811 |
| Klhl17    | -0.1555  | 0.765182 | 0.890811 |
| Accs      | -0.11951 | 0.764902 | 0.89073  |
| Gm37485   | -0.40128 | 0.764681 | 0.890663 |
| Sec16a    | -0.04205 | 0.764555 | 0.890602 |
| Gm12940   | -0.07194 | 0.764517 | 0.890602 |
| Pcbp4     | -0.03347 | 0.764407 | 0.890602 |
| Tm9sf4    | -0.03515 | 0.764045 | 0.89035  |
| Ctsf      | -0.04194 | 0.76401  | 0.89035  |
| Firre     | -0.05772 | 0.763813 | 0.89035  |
| Zkscan7   | -0.09062 | 0.763759 | 0.89035  |

|           |          |          |          |
|-----------|----------|----------|----------|
| Lrrc27    | -0.19771 | 0.763387 | 0.890073 |
| Gm13583   | -0.43225 | 0.763292 | 0.890073 |
| Trim11    | -0.05769 | 0.763255 | 0.890073 |
| Ccnb2-ps  | -0.25964 | 0.763222 | 0.890073 |
| Ak1       | -0.12527 | 0.76316  | 0.890073 |
| Tacc2     | -0.05509 | 0.763091 | 0.890073 |
| Slc30a6   | -0.08502 | 0.762822 | 0.890073 |
| Hspa14    | -0.03944 | 0.762452 | 0.889815 |
| Atxn7l1   | -0.06371 | 0.762299 | 0.88975  |
| Cyp4v3    | -0.08237 | 0.762206 | 0.889735 |
| Daglb     | -0.06606 | 0.761588 | 0.8895   |
| Wipf1     | -0.04462 | 0.761478 | 0.88944  |
| Kif5a     | -0.13853 | 0.761254 | 0.889318 |
| Foxs1     | -0.0562  | 0.760616 | 0.888849 |
| Scarf2    | -0.06919 | 0.760567 | 0.888849 |
| Camsap1   | -0.03895 | 0.760365 | 0.888764 |
| Nupl2     | -0.13168 | 0.760171 | 0.888607 |
| Gm48706   | -0.24052 | 0.759832 | 0.888349 |
| Gng3      | -0.15219 | 0.759746 | 0.888349 |
| Cbl       | -0.02969 | 0.759376 | 0.888094 |
| D2hgdh    | -0.09925 | 0.759234 | 0.887998 |
| Ttll3     | -0.10032 | 0.759131 | 0.887946 |
| Ankrd35   | -0.30924 | 0.758783 | 0.887886 |
| Gm44835   | -0.19849 | 0.758541 | 0.887742 |
| Gm29562   | -0.29349 | 0.75845  | 0.887704 |
| Atp6v1e1  | -0.02645 | 0.75841  | 0.887704 |
| Zc3h10    | -0.06681 | 0.757945 | 0.887355 |
| Tfap4     | -0.08581 | 0.75753  | 0.886974 |
| Gm38071   | -0.25611 | 0.757479 | 0.886974 |
| Mrpl55    | -0.04666 | 0.757456 | 0.886974 |
| Usp28     | -0.10667 | 0.75708  | 0.886864 |
| Dbnl      | -0.04111 | 0.756723 | 0.886723 |
| D630045J1 | -0.12033 | 0.755954 | 0.886168 |
| Gm44623   | -0.23025 | 0.755454 | 0.88579  |
| Adamts18  | -0.32884 | 0.755107 | 0.885553 |
| Cep70     | -0.06595 | 0.755093 | 0.885553 |
| Pkd2      | -0.02981 | 0.75482  | 0.885394 |
| Usp16     | -0.03785 | 0.754811 | 0.885394 |
| Tollip    | -0.04195 | 0.754179 | 0.885058 |
| Mink1     | -0.03436 | 0.754062 | 0.884993 |
| Rasa1     | -0.03047 | 0.753928 | 0.884993 |
| Lptm4b    | -0.03537 | 0.753649 | 0.884921 |
| Rnft1     | -0.05594 | 0.753273 | 0.884619 |
| AA986860  | -0.17492 | 0.752838 | 0.884316 |
| Gm37320   | -0.13924 | 0.752339 | 0.88396  |
| Uhrf1bp1l | -0.06582 | 0.752254 | 0.88396  |
| Wars2     | -0.09665 | 0.750928 | 0.883041 |

|           |          |          |          |
|-----------|----------|----------|----------|
| Gm41760   | -0.24715 | 0.750908 | 0.883041 |
| Prr7      | -0.08941 | 0.75089  | 0.883041 |
| Slc49a4   | -0.04838 | 0.750658 | 0.883041 |
| Catsper4  | -0.48656 | 0.749955 | 0.882522 |
| Gm41077   | -0.33608 | 0.749753 | 0.882492 |
| Tbl3      | -0.07177 | 0.749689 | 0.882486 |
| Uty       | -0.05874 | 0.749373 | 0.882253 |
| Gm14305   | -0.09636 | 0.749015 | 0.881971 |
| Snx7      | -0.07033 | 0.748577 | 0.881662 |
| Ccdc69    | -0.14034 | 0.748394 | 0.881516 |
| E130308A  | -0.07035 | 0.748245 | 0.881479 |
| Gm4792    | -0.12513 | 0.748204 | 0.881479 |
| Ptcd2     | -0.04681 | 0.747953 | 0.881274 |
| H4c14     | -0.16062 | 0.747513 | 0.881171 |
| Ptcd3     | -0.06024 | 0.747468 | 0.881171 |
| Elmod3    | -0.08794 | 0.747385 | 0.88116  |
| Galk2     | -0.09484 | 0.747068 | 0.880925 |
| Cd164     | -0.02816 | 0.747041 | 0.880925 |
| Raver2    | -0.1285  | 0.746845 | 0.88087  |
| Dtwd2     | -0.12477 | 0.746456 | 0.880665 |
| Gm37215   | -0.15205 | 0.746115 | 0.880426 |
| Gpr137b-p | -0.0815  | 0.745965 | 0.880387 |
| Zkscan4   | -0.137   | 0.745875 | 0.880387 |
| Car10     | -0.315   | 0.745683 | 0.880286 |
| Rnf122    | -0.09572 | 0.74553  | 0.880286 |
| Zmym3     | -0.06974 | 0.745282 | 0.880275 |
| Mcm4      | -0.06822 | 0.745162 | 0.880202 |
| Atr       | -0.05992 | 0.745153 | 0.880202 |
| Lars      | -0.04099 | 0.744911 | 0.880044 |
| Sbf1      | -0.05253 | 0.744872 | 0.880044 |
| Zbtb49    | -0.10952 | 0.744715 | 0.880021 |
| Lrfrn3    | -0.13608 | 0.744587 | 0.87994  |
| Cadm1     | -0.03191 | 0.744157 | 0.87957  |
| Gpam      | -0.07534 | 0.743977 | 0.879496 |
| Ciao2b    | -0.03263 | 0.743904 | 0.87948  |
| Skiv2l    | -0.0568  | 0.743791 | 0.87948  |
| Fra10ac1  | -0.05089 | 0.743757 | 0.87948  |
| Gm21092   | -0.21665 | 0.743404 | 0.879305 |
| Rbm15     | -0.05061 | 0.743205 | 0.87916  |
| Zfp879    | -0.24785 | 0.743077 | 0.87916  |
| Gm38340   | -0.13018 | 0.742914 | 0.879142 |
| Mgat5     | -0.06769 | 0.742881 | 0.879142 |
| Dusp12    | -0.07016 | 0.742824 | 0.879142 |
| Dpy19l4   | -0.04668 | 0.742801 | 0.879142 |
| Rnf182    | -0.31266 | 0.741973 | 0.878584 |
| Ssb       | -0.02175 | 0.741706 | 0.878338 |
| Lipo3     | -0.10449 | 0.741612 | 0.878336 |

|          |          |          |          |
|----------|----------|----------|----------|
| Lpcat2   | -0.11617 | 0.741338 | 0.87811  |
| Rsph10b  | -0.23647 | 0.741239 | 0.87811  |
| Tars2    | -0.07102 | 0.74085  | 0.87788  |
| Pum1     | -0.02636 | 0.74034  | 0.877553 |
| Zfp804a  | -0.48204 | 0.740075 | 0.877378 |
| Klhl22   | -0.07907 | 0.739961 | 0.877378 |
| Clcn5    | -0.13155 | 0.739932 | 0.877378 |
| Crif3    | -0.038   | 0.739529 | 0.877078 |
| Gm26510  | -0.11366 | 0.739494 | 0.877078 |
| Trip12   | -0.02779 | 0.738782 | 0.876635 |
| Dcdc2a   | -0.12339 | 0.737713 | 0.875982 |
| Adal     | -0.08979 | 0.737288 | 0.875865 |
| Dnai2    | -0.32785 | 0.737284 | 0.875865 |
| Pip4k2c  | -0.04705 | 0.737032 | 0.875781 |
| Gfap     | -0.19209 | 0.736125 | 0.874911 |
| Gm42585  | -0.13947 | 0.735917 | 0.874735 |
| Pinx1    | -0.0787  | 0.735558 | 0.874446 |
| 2410124H | -0.34704 | 0.735432 | 0.874435 |
| Frg1     | -0.03998 | 0.735235 | 0.874409 |
| Chst10   | -0.23614 | 0.734861 | 0.874172 |
| Gm4221   | -0.32391 | 0.734646 | 0.873986 |
| Dhcr7    | -0.10323 | 0.734371 | 0.873729 |
| Tmem199  | -0.06799 | 0.73403  | 0.873498 |
| Mettl5   | -0.06177 | 0.732941 | 0.872721 |
| Mrtfa    | -0.08978 | 0.732789 | 0.87261  |
| Gm45447  | -0.28781 | 0.732742 | 0.87261  |
| Dennd6b  | -0.10302 | 0.731967 | 0.871978 |
| Ric8b    | -0.05144 | 0.731775 | 0.871887 |
| Fastkd5  | -0.12093 | 0.731481 | 0.871746 |
| Sprtn    | -0.07112 | 0.731409 | 0.871729 |
| Ensa     | -0.03401 | 0.731191 | 0.871608 |
| Armc2    | -0.28086 | 0.731185 | 0.871608 |
| Slc22a30 | -0.38223 | 0.731131 | 0.871608 |
| 2810402E | -0.07815 | 0.730736 | 0.871608 |
| Cox15    | -0.09685 | 0.730683 | 0.871608 |
| Sat2     | -0.15024 | 0.730578 | 0.871599 |
| Cdca4    | -0.08944 | 0.730574 | 0.871599 |
| Zdhhc3   | -0.04326 | 0.730529 | 0.871599 |
| Samd15   | -0.18533 | 0.730495 | 0.871599 |
| Gga2     | -0.0906  | 0.730481 | 0.871599 |
| Zfyve26  | -0.07546 | 0.729983 | 0.871486 |
| B4galt2  | -0.08851 | 0.729889 | 0.871486 |
| 9530097N | -0.15527 | 0.729541 | 0.871166 |
| Nap1l2   | -0.26694 | 0.72943  | 0.871166 |
| Nthl1    | -0.07062 | 0.729398 | 0.871166 |
| Pcid2    | -0.07097 | 0.729311 | 0.871166 |
| Rab43    | -0.11585 | 0.729249 | 0.871165 |

|           |          |          |          |
|-----------|----------|----------|----------|
| Wdhd1     | -0.1398  | 0.729177 | 0.871165 |
| Safb      | -0.03479 | 0.729015 | 0.871098 |
| Zfp169    | -0.16368 | 0.728891 | 0.871098 |
| Sec61a2   | -0.06697 | 0.728675 | 0.871098 |
| Hira      | -0.07003 | 0.72866  | 0.871098 |
| Aatf      | -0.07167 | 0.7284   | 0.871098 |
| Tango2    | -0.08474 | 0.728384 | 0.871098 |
| Ufd1      | -0.04329 | 0.727276 | 0.870233 |
| Aif1      | -0.46578 | 0.727137 | 0.870233 |
| Hacd3     | -0.05258 | 0.727095 | 0.870233 |
| Epb41l1   | -0.08007 | 0.727067 | 0.870233 |
| Gm6222    | -0.1733  | 0.726875 | 0.870134 |
| Khsrp     | -0.04389 | 0.726483 | 0.869804 |
| Dennd10   | -0.04733 | 0.726348 | 0.869782 |
| Gm45221   | -0.07955 | 0.725886 | 0.869476 |
| Olfm4     | -0.12929 | 0.725786 | 0.869456 |
| Gm42446   | -0.29372 | 0.725511 | 0.869254 |
| 9230112E  | -0.24586 | 0.725461 | 0.869254 |
| Unc13b    | -0.0312  | 0.725367 | 0.869254 |
| Pear1     | -0.0383  | 0.72532  | 0.869254 |
| Dcp1a     | -0.07248 | 0.725221 | 0.869254 |
| 4930404N  | -0.2926  | 0.725035 | 0.869183 |
| L3mbtl2   | -0.07954 | 0.724809 | 0.868982 |
| Rbm28     | -0.04273 | 0.724535 | 0.868794 |
| Rpl36-ps2 | -0.13634 | 0.72442  | 0.868794 |
| Gm42669   | -0.52528 | 0.723792 | 0.868249 |
| Twsg1     | -0.0502  | 0.723537 | 0.868012 |
| Abhd14b   | -0.04948 | 0.72342  | 0.868011 |
| Prag1     | -0.08847 | 0.723243 | 0.867971 |
| Usp5      | -0.06138 | 0.72322  | 0.867971 |
| Csnk1g1   | -0.04186 | 0.722878 | 0.867709 |
| Ebag9     | -0.0659  | 0.722409 | 0.867333 |
| Rusf1     | -0.11049 | 0.721148 | 0.866396 |
| Zfr2      | -0.14209 | 0.721142 | 0.866396 |
| Tesk1     | -0.05722 | 0.721049 | 0.866396 |
| Tjap1     | -0.07531 | 0.720771 | 0.866396 |
| Appbp2    | -0.0361  | 0.720257 | 0.866088 |
| Gm38043   | -0.15412 | 0.720168 | 0.866088 |
| Cdc7      | -0.11954 | 0.720076 | 0.866088 |
| Cul5      | -0.03538 | 0.719962 | 0.866088 |
| Nsun2     | -0.05611 | 0.71996  | 0.866088 |
| Zrsr2     | -0.03842 | 0.719958 | 0.866088 |
| Chchd7    | -0.04475 | 0.719917 | 0.866088 |
| Acap3     | -0.08651 | 0.719556 | 0.866012 |
| Slc39a3   | -0.06583 | 0.719331 | 0.865968 |
| Crtc2     | -0.05814 | 0.719262 | 0.865968 |
| Gm44702   | -0.35914 | 0.71916  | 0.865953 |



|          |          |          |          |
|----------|----------|----------|----------|
| Eloa     | -0.04801 | 0.719073 | 0.865918 |
| Zfp280c  | -0.08953 | 0.718823 | 0.865839 |
| Snx15    | -0.05431 | 0.718646 | 0.865822 |
| Dph2     | -0.14325 | 0.718492 | 0.865706 |
| Gm48254  | -0.21378 | 0.718349 | 0.865603 |
| Kctd3    | -0.07616 | 0.718129 | 0.86555  |
| Peak1    | -0.03389 | 0.717628 | 0.865153 |
| Fam50a   | -0.04477 | 0.717572 | 0.865153 |
| C77080   | -0.1623  | 0.716931 | 0.864934 |
| Mras     | -0.06771 | 0.716682 | 0.864778 |
| Mcee     | -0.04446 | 0.716421 | 0.864672 |
| Phf6     | -0.06292 | 0.716415 | 0.864672 |
| Syngn3   | -0.27587 | 0.715999 | 0.864371 |
| Itsn1    | -0.05965 | 0.715883 | 0.86431  |
| Gm8184   | -0.24615 | 0.715702 | 0.864222 |
| Gm37864  | -0.26577 | 0.715564 | 0.864147 |
| Gm49538  | -0.21204 | 0.715548 | 0.864147 |
| Lamc1    | -0.02809 | 0.715269 | 0.864047 |
| Znfx1    | -0.04055 | 0.714451 | 0.863135 |
| Gm20633  | -0.34941 | 0.714402 | 0.863135 |
| Gm10800  | -0.27622 | 0.714206 | 0.863135 |
| Saal1    | -0.09793 | 0.714153 | 0.863135 |
| 5430405H | -0.07732 | 0.714122 | 0.863135 |
| Pacs1n1  | -0.09458 | 0.714065 | 0.863135 |
| Lfng     | -0.07212 | 0.713963 | 0.863135 |
| Arrdc3   | -0.07041 | 0.713928 | 0.863135 |
| Fam161b  | -0.17044 | 0.713556 | 0.862954 |
| Zim1     | -0.381   | 0.71329  | 0.862841 |
| Hepacam  | -0.21682 | 0.713234 | 0.862841 |
| Gm53055  | -0.11402 | 0.713023 | 0.862727 |
| Ehhadh   | -0.20836 | 0.712178 | 0.861983 |
| Zfp523   | -0.0756  | 0.71146  | 0.861322 |
| Krr1     | -0.05045 | 0.711409 | 0.861322 |
| 2310057N | -0.08282 | 0.711155 | 0.861232 |
| Pom121   | -0.049   | 0.710398 | 0.860803 |
| Maneal   | -0.158   | 0.71034  | 0.860803 |
| Tafa4    | -0.2455  | 0.710256 | 0.86077  |
| Trak2    | -0.04077 | 0.710177 | 0.860744 |
| Rab40b   | -0.15688 | 0.709976 | 0.860698 |
| Gm47863  | -0.14656 | 0.709884 | 0.860698 |
| Noa1     | -0.10861 | 0.70916  | 0.860486 |
| Ap3b2    | -0.12208 | 0.709104 | 0.860486 |
| Tmem9b   | -0.04377 | 0.709105 | 0.860486 |
| Gm6345   | -0.35913 | 0.708961 | 0.860486 |
| Cog3     | -0.07738 | 0.708812 | 0.860486 |
| Prpsap1  | -0.0483  | 0.708678 | 0.86046  |
| 8430422N | -0.1629  | 0.708601 | 0.86046  |

|           |          |          |          |
|-----------|----------|----------|----------|
| Srpk1     | -0.03925 | 0.708286 | 0.860263 |
| Gatb      | -0.14165 | 0.708063 | 0.860131 |
| Gm10461   | -0.20041 | 0.707901 | 0.860004 |
| Arih1     | -0.03725 | 0.707862 | 0.860004 |
| Bmpr1b    | -0.3987  | 0.707499 | 0.859795 |
| Ap3b1     | -0.04653 | 0.70734  | 0.859703 |
| Fam189b   | -0.12409 | 0.707158 | 0.85959  |
| Gm26779   | -0.3691  | 0.707009 | 0.859479 |
| Gm13092   | -0.22945 | 0.706917 | 0.859437 |
| B4galt7   | -0.09909 | 0.706867 | 0.859437 |
| Tbxa2r    | -0.07383 | 0.706622 | 0.859357 |
| Mrpl45    | -0.06935 | 0.706399 | 0.859156 |
| Mrps27    | -0.10333 | 0.706381 | 0.859156 |
| Tmem68    | -0.07925 | 0.706244 | 0.859106 |
| Ltv1      | -0.08352 | 0.706072 | 0.858967 |
| Gm19445   | -0.1741  | 0.706016 | 0.858967 |
| Sdsl      | -0.21402 | 0.705798 | 0.858774 |
| Zscan29   | -0.08555 | 0.705677 | 0.858696 |
| Nipbl     | -0.02399 | 0.705615 | 0.858693 |
| Tbc1d10b  | -0.06168 | 0.705422 | 0.858599 |
| 2010109A  | -0.26293 | 0.705214 | 0.858482 |
| Ccdc130   | -0.11043 | 0.704979 | 0.858265 |
| Zfp354a   | -0.08753 | 0.704874 | 0.858249 |
| 2700049A  | -0.07836 | 0.704829 | 0.858249 |
| Pcp4      | -0.12343 | 0.70468  | 0.85818  |
| Npepl1    | -0.04654 | 0.704612 | 0.858167 |
| Camkv     | -0.35042 | 0.70455  | 0.858162 |
| Tasp1     | -0.1056  | 0.704526 | 0.858162 |
| Zfp110    | -0.05976 | 0.704412 | 0.858162 |
| Neto2     | -0.32367 | 0.704195 | 0.858078 |
| Cbx3      | -0.02739 | 0.704127 | 0.858065 |
| Cyp27a1   | -0.17308 | 0.704053 | 0.858045 |
| Bclaf3    | -0.06355 | 0.703373 | 0.857599 |
| Gm3052    | -0.38062 | 0.703319 | 0.857599 |
| B430010I2 | -0.04736 | 0.703009 | 0.857599 |
| Tmem223   | -0.044   | 0.702536 | 0.857313 |
| Zfp97     | -0.23979 | 0.702045 | 0.856923 |
| Tti2      | -0.09453 | 0.701981 | 0.856915 |
| Adgrb2    | -0.25101 | 0.701944 | 0.856915 |
| Btbd8     | -0.12054 | 0.700622 | 0.855674 |
| Naa10     | -0.05703 | 0.700235 | 0.855341 |
| Gm42872   | -0.51408 | 0.700035 | 0.855307 |
| Tmem177   | -0.14842 | 0.699515 | 0.854811 |
| Pgrmc2    | -0.03836 | 0.699371 | 0.854774 |
| Dlgap1    | -0.20923 | 0.69925  | 0.854696 |
| Bmp4      | -0.12189 | 0.69885  | 0.854417 |
| Inpp5b    | -0.06498 | 0.698796 | 0.854417 |

|           |          |          |          |
|-----------|----------|----------|----------|
| Gm19412   | -0.19451 | 0.69869  | 0.85436  |
| Cfap126   | -0.30752 | 0.698526 | 0.854328 |
| Dner      | -0.3478  | 0.69837  | 0.854328 |
| Ppfia3    | -0.28373 | 0.698273 | 0.854328 |
| Nup37     | -0.11081 | 0.698036 | 0.854188 |
| Umad1     | -0.11269 | 0.697653 | 0.85393  |
| Pold3     | -0.06788 | 0.697121 | 0.853696 |
| Gsap      | -0.15718 | 0.697018 | 0.853641 |
| Tpd52l1   | -0.07571 | 0.696879 | 0.85354  |
| Naa40     | -0.07657 | 0.696716 | 0.85348  |
| Eif3d     | -0.03647 | 0.696686 | 0.85348  |
| B130055N  | -0.22943 | 0.696602 | 0.85348  |
| Cntnap2   | -0.13614 | 0.69617  | 0.853374 |
| Arid3b    | -0.09425 | 0.696025 | 0.853331 |
| Gm19705   | -0.12273 | 0.695933 | 0.853288 |
| Gpr152    | -0.13882 | 0.695095 | 0.852471 |
| Gm50273   | -0.39491 | 0.694793 | 0.852263 |
| 1190005I0 | -0.08936 | 0.694812 | 0.852263 |
| Mex3d     | -0.08242 | 0.694598 | 0.85221  |
| Cmss1     | -0.07968 | 0.694444 | 0.852091 |
| Taco1     | -0.153   | 0.694331 | 0.852046 |
| Zfp445    | -0.04101 | 0.694312 | 0.852046 |
| Eif4ebp2  | -0.03485 | 0.694185 | 0.852046 |
| Eya3      | -0.08034 | 0.694107 | 0.852046 |
| Abcb10    | -0.0754  | 0.693946 | 0.852039 |
| Ap4e1     | -0.09437 | 0.69392  | 0.852039 |
| Cplx3     | -0.13694 | 0.693649 | 0.851884 |
| Zfp763    | -0.10414 | 0.693083 | 0.851394 |
| Slco4a1   | -0.09147 | 0.692851 | 0.851294 |
| Gm27029   | -0.33143 | 0.692339 | 0.850897 |
| Virma     | -0.04979 | 0.692279 | 0.850897 |
| Klhdc4    | -0.08982 | 0.691734 | 0.850438 |
| Tomm70a   | -0.04348 | 0.691334 | 0.850157 |
| D130020Li | -0.1592  | 0.691258 | 0.850133 |
| Rragd     | -0.14799 | 0.69118  | 0.850106 |
| Las1l     | -0.05065 | 0.691087 | 0.850106 |
| Casq2     | -0.04294 | 0.690967 | 0.850106 |
| Gm50010   | -0.18709 | 0.690066 | 0.849224 |
| Cycs      | -0.03746 | 0.689873 | 0.849196 |
| Timm10    | -0.07594 | 0.68987  | 0.849196 |
| Nlk       | -0.04768 | 0.689509 | 0.848958 |
| Sptssa    | -0.02836 | 0.689431 | 0.848932 |
| Mtcl1     | -0.07937 | 0.689023 | 0.848709 |
| Dmtn      | -0.15227 | 0.688975 | 0.848709 |
| Akr1b3    | -0.05038 | 0.688863 | 0.848709 |
| Eea1      | -0.0369  | 0.68872  | 0.848709 |
| Mvb12b    | -0.06493 | 0.688688 | 0.848709 |

|          |          |          |          |
|----------|----------|----------|----------|
| D8Ert738 | -0.02547 | 0.688399 | 0.848498 |
| Hpca     | -0.36629 | 0.68836  | 0.848498 |
| Smim24   | -0.15293 | 0.688357 | 0.848498 |
| Dzip1    | -0.13425 | 0.688288 | 0.848498 |
| Stx18    | -0.07476 | 0.687969 | 0.848387 |
| 5330438D | -0.13426 | 0.687888 | 0.848387 |
| Thap1    | -0.10605 | 0.687882 | 0.848387 |
| Appl2    | -0.0739  | 0.687693 | 0.848326 |
| Farp2    | -0.13022 | 0.687369 | 0.848067 |
| Cfap61   | -0.39818 | 0.687311 | 0.848065 |
| Fads3    | -0.07953 | 0.686433 | 0.847471 |
| E130102H | -0.06882 | 0.686359 | 0.847448 |
| Nop9     | -0.08822 | 0.686329 | 0.847448 |
| Rbm17    | -0.04774 | 0.686258 | 0.847448 |
| Gm20342  | -0.09084 | 0.685764 | 0.846994 |
| Ftl1-ps1 | -0.13527 | 0.685639 | 0.846954 |
| Acad11   | -0.10437 | 0.685255 | 0.846714 |
| Spata13  | -0.0537  | 0.685243 | 0.846714 |
| MIh1     | -0.12521 | 0.685242 | 0.846714 |
| Gm10857  | -0.51501 | 0.685152 | 0.846714 |
| Trp53rka | -0.07569 | 0.685198 | 0.846714 |
| Kdm3b    | -0.05987 | 0.685003 | 0.846714 |
| Ankrd17  | -0.03345 | 0.684784 | 0.846552 |
| Gpr161   | -0.13134 | 0.684693 | 0.846509 |
| Sdhaf3   | -0.10123 | 0.68453  | 0.846437 |
| Ash2l    | -0.05954 | 0.684165 | 0.846185 |
| Amt      | -0.14308 | 0.683622 | 0.845788 |
| Gm48838  | -0.14299 | 0.683511 | 0.845765 |
| Gm47963  | -0.21331 | 0.68343  | 0.845765 |
| Fbln5    | -0.15345 | 0.683032 | 0.845503 |
| Armcx5   | -0.07324 | 0.682871 | 0.845503 |
| Gm10069  | -0.31417 | 0.682822 | 0.845503 |
| Atp2a2   | -0.02942 | 0.682787 | 0.845503 |
| Rsl24d1  | -0.05681 | 0.682749 | 0.845503 |
| Gm42918  | -0.28097 | 0.682407 | 0.845358 |
| A730017L | -0.1911  | 0.682279 | 0.84527  |
| Inip     | -0.07756 | 0.681414 | 0.844477 |
| MIlt11   | -0.13186 | 0.681339 | 0.844455 |
| Gm45286  | -0.34519 | 0.681251 | 0.844415 |
| Rd3l     | -0.18955 | 0.680813 | 0.843943 |
| Ccdc150  | -0.49205 | 0.680733 | 0.843913 |
| Atg13    | -0.07042 | 0.680251 | 0.843597 |
| Ppp1r12b | -0.06304 | 0.679521 | 0.843158 |
| Cep152   | -0.15641 | 0.678929 | 0.842653 |
| Abhd4    | -0.05936 | 0.678516 | 0.842403 |
| BC055402 | -0.09363 | 0.678327 | 0.842325 |
| Prkcq    | -0.39099 | 0.678104 | 0.842257 |

|          |          |          |          |
|----------|----------|----------|----------|
| Hpcal4   | -0.2792  | 0.677841 | 0.842001 |
| Platr1   | -0.62995 | 0.677757 | 0.841967 |
| Sap30bp  | -0.06234 | 0.677736 | 0.841967 |
| Siah1b   | -0.14664 | 0.67771  | 0.841967 |
| Bod1     | -0.0439  | 0.677305 | 0.841876 |
| Gm42445  | -0.6025  | 0.677051 | 0.841669 |
| Abcd4    | -0.07477 | 0.677068 | 0.841669 |
| Reep3    | -0.02287 | 0.677015 | 0.841669 |
| Katnal1  | -0.09278 | 0.67669  | 0.841479 |
| Urm1     | -0.06402 | 0.676689 | 0.841479 |
| Cx3cr1   | -0.29721 | 0.676206 | 0.841228 |
| Fpgt     | -0.0992  | 0.676233 | 0.841228 |
| Car14    | -0.07745 | 0.676161 | 0.841228 |
| Polr2c   | -0.03773 | 0.676037 | 0.841228 |
| Zfp128   | -0.19346 | 0.675972 | 0.841228 |
| Kif9     | -0.25848 | 0.675755 | 0.841084 |
| Cradd    | -0.0941  | 0.675688 | 0.84107  |
| Cenpv    | -0.08858 | 0.675524 | 0.840952 |
| Pstk     | -0.06633 | 0.675289 | 0.840784 |
| Thg1l    | -0.18501 | 0.675262 | 0.840784 |
| Ptpn11   | -0.03745 | 0.67513  | 0.840752 |
| Gpd2     | -0.03088 | 0.674734 | 0.840473 |
| Pcdhga12 | -0.10738 | 0.674668 | 0.840473 |
| Elavl1   | -0.04225 | 0.674654 | 0.840473 |
| Slc2a13  | -0.2299  | 0.674574 | 0.840473 |
| Gm37931  | -0.34045 | 0.674011 | 0.840095 |
| Yme1l1   | -0.04036 | 0.674026 | 0.840095 |
| 1700007K | -0.37758 | 0.673976 | 0.840095 |
| Ap1b1    | -0.06605 | 0.673856 | 0.840095 |
| BC002059 | -0.11035 | 0.673657 | 0.839953 |
| Pusl1    | -0.13529 | 0.673583 | 0.839953 |
| Jpt2     | -0.16347 | 0.673327 | 0.839953 |
| Rnf166   | -0.06311 | 0.672819 | 0.839664 |
| Wdr11    | -0.07012 | 0.672768 | 0.839664 |
| Wbp11    | -0.0382  | 0.672326 | 0.839328 |
| Tmem138  | -0.0959  | 0.672227 | 0.839295 |
| H2ac20   | -0.18573 | 0.672071 | 0.839295 |
| Gm44432  | -0.13575 | 0.671901 | 0.839287 |
| Bcap31   | -0.0339  | 0.671695 | 0.839171 |
| Mrpl39   | -0.08487 | 0.671478 | 0.83911  |
| Ap4b1    | -0.13071 | 0.671465 | 0.83911  |
| Fzr1     | -0.08794 | 0.671356 | 0.83911  |
| Psmc4    | -0.04141 | 0.671215 | 0.83911  |
| Lztr1    | -0.08174 | 0.670531 | 0.838556 |
| Ptar1    | -0.05395 | 0.670512 | 0.838556 |
| Coq6     | -0.10374 | 0.670115 | 0.838246 |
| Zfp81    | -0.09193 | 0.669951 | 0.83811  |

|          |          |          |          |
|----------|----------|----------|----------|
| Pgbd1    | -0.35035 | 0.669814 | 0.83808  |
| Gm28661  | -0.21221 | 0.669762 | 0.83808  |
| Cacna2d2 | -0.18611 | 0.669713 | 0.83808  |
| Ccdc86   | -0.10089 | 0.66889  | 0.837273 |
| Snape4   | -0.14433 | 0.668787 | 0.837214 |
| Gm44430  | -0.5864  | 0.66869  | 0.837182 |
| Pnmal2   | -0.13218 | 0.66859  | 0.837182 |
| Psmb3    | -0.03026 | 0.66857  | 0.837182 |
| Prkd1    | -0.09267 | 0.668548 | 0.837182 |
| Ercc6    | -0.09498 | 0.668392 | 0.837182 |
| Braf     | -0.04761 | 0.667644 | 0.836553 |
| Sacm1l   | -0.05668 | 0.667306 | 0.836339 |
| Fbxl6    | -0.07029 | 0.667058 | 0.836099 |
| Thumpd3  | -0.0849  | 0.667034 | 0.836099 |
| Ppfia2   | -0.1381  | 0.667011 | 0.836099 |
| Hs3st4   | -0.4552  | 0.666986 | 0.836099 |
| 3830406C | -0.05551 | 0.666419 | 0.835857 |
| Smyd5    | -0.15231 | 0.66593  | 0.835524 |
| Timm9    | -0.06934 | 0.665789 | 0.835524 |
| Usp43    | -0.12476 | 0.665306 | 0.835094 |
| Zfp719   | -0.12491 | 0.665309 | 0.835094 |
| Mkl      | -0.13086 | 0.664897 | 0.834788 |
| Etaa1os  | -0.22722 | 0.66485  | 0.834788 |
| Ncoa4    | -0.05127 | 0.664605 | 0.834631 |
| Evl      | -0.05687 | 0.664589 | 0.834631 |
| 9330159N | -0.17285 | 0.664532 | 0.834631 |
| Msh3     | -0.0818  | 0.664091 | 0.834265 |
| Pdcd2    | -0.08232 | 0.663613 | 0.833844 |
| Cuta     | -0.03749 | 0.663556 | 0.833844 |
| Ric8a    | -0.05948 | 0.663394 | 0.833739 |
| Rbms1    | -0.02546 | 0.663359 | 0.833739 |
| Lat      | -0.50696 | 0.663299 | 0.833739 |
| Pdzd7    | -0.38814 | 0.663224 | 0.833736 |
| Tbc1d5   | -0.07465 | 0.662955 | 0.833537 |
| Brd3     | -0.04353 | 0.662763 | 0.833366 |
| Lbhd1    | -0.09749 | 0.662702 | 0.833359 |
| Vezt     | -0.07097 | 0.662685 | 0.833359 |
| Uba7     | -0.0712  | 0.662637 | 0.833359 |
| Hcfc1r1  | -0.03818 | 0.662583 | 0.833359 |
| Nhs      | -0.10976 | 0.662383 | 0.833272 |
| Stam2    | -0.05885 | 0.662303 | 0.833272 |
| Gm26782  | -0.08811 | 0.662098 | 0.83316  |
| Msl2     | -0.04763 | 0.662031 | 0.833146 |
| Plpp5    | -0.07338 | 0.661895 | 0.833114 |
| Vax2os   | -0.04447 | 0.661708 | 0.833019 |
| 4833418N | -0.16137 | 0.661442 | 0.832824 |
| Hexa     | -0.06713 | 0.660719 | 0.832124 |

|          |          |          |          |
|----------|----------|----------|----------|
| Cldn23   | -0.42303 | 0.660684 | 0.832124 |
| Uvrag    | -0.04973 | 0.660279 | 0.83185  |
| Gpbp1    | -0.04056 | 0.66026  | 0.83185  |
| Ube2v1   | -0.13177 | 0.660155 | 0.831834 |
| Atf2     | -0.04695 | 0.660145 | 0.831834 |
| Tle6     | -0.45633 | 0.65995  | 0.831785 |
| Tcf25    | -0.02698 | 0.659804 | 0.831741 |
| 4633401B | -0.20651 | 0.659688 | 0.831665 |
| Taf1c    | -0.1252  | 0.659666 | 0.831665 |
| Gm6658   | -0.3323  | 0.659665 | 0.831665 |
| Fhit     | -0.37996 | 0.659385 | 0.831563 |
| Apba2    | -0.27383 | 0.658974 | 0.831254 |
| Lmnb1    | -0.08719 | 0.658748 | 0.831109 |
| Lca5     | -0.09491 | 0.658486 | 0.830919 |
| Gm37436  | -0.16307 | 0.658091 | 0.830561 |
| Mrps33   | -0.0347  | 0.65795  | 0.830452 |
| Saxo2    | -0.18874 | 0.657691 | 0.830336 |
| Pip5k1b  | -0.08848 | 0.657548 | 0.830296 |
| Cox19    | -0.06589 | 0.657244 | 0.830192 |
| Kdm1b    | -0.13059 | 0.657212 | 0.830192 |
| Rsbn1    | -0.04436 | 0.657158 | 0.830192 |
| Pofut1   | -0.0682  | 0.657115 | 0.830192 |
| Gm8738   | -0.20703 | 0.657035 | 0.830192 |
| Chac2    | -0.119   | 0.656927 | 0.830192 |
| Socs6    | -0.07483 | 0.656833 | 0.830192 |
| Gm48298  | -0.30471 | 0.656469 | 0.82993  |
| Vps26b   | -0.0994  | 0.656483 | 0.82993  |
| Lgi4     | -0.28019 | 0.656328 | 0.829874 |
| Pdpr     | -0.11084 | 0.656037 | 0.829674 |
| Zan      | -0.27525 | 0.655856 | 0.829674 |
| Fitm2    | -0.09875 | 0.65521  | 0.829511 |
| Trpc1    | -0.07813 | 0.655053 | 0.829453 |
| Fez1     | -0.11801 | 0.654932 | 0.82944  |
| Bicd2    | -0.04764 | 0.654835 | 0.82944  |
| Acp1     | -0.0446  | 0.654687 | 0.82941  |
| Lama5    | -0.04499 | 0.654628 | 0.829406 |
| Gtf3c2   | -0.05555 | 0.654522 | 0.829342 |
| Fnip1    | -0.06167 | 0.654505 | 0.829342 |
| Tcea1    | -0.04265 | 0.653161 | 0.828037 |
| Nudt12   | -0.11685 | 0.653148 | 0.828037 |
| Them4    | -0.10026 | 0.653072 | 0.828037 |
| Dnajc11  | -0.08244 | 0.652905 | 0.828033 |
| Zfp637   | -0.06418 | 0.652419 | 0.827794 |
| Tnpo3    | -0.05461 | 0.652407 | 0.827794 |
| Vegfb    | -0.06125 | 0.651943 | 0.827544 |
| 2610011E | -0.20374 | 0.651893 | 0.827544 |
| Mtif2    | -0.07524 | 0.651818 | 0.827544 |

|          |          |          |          |
|----------|----------|----------|----------|
| Cep164   | -0.05575 | 0.651324 | 0.82711  |
| Gatc     | -0.09329 | 0.651054 | 0.8271   |
| Gm42895  | -0.19398 | 0.650994 | 0.8271   |
| Zc3h15   | -0.04175 | 0.650676 | 0.826848 |
| Gm47773  | -0.48207 | 0.650373 | 0.826532 |
| Trmt12   | -0.13852 | 0.649783 | 0.82599  |
| A030005L | -0.2863  | 0.649098 | 0.825417 |
| Ddx23    | -0.06269 | 0.648528 | 0.824888 |
| Fbln1    | -0.30818 | 0.648498 | 0.824888 |
| Gm37474  | -0.05173 | 0.648485 | 0.824888 |
| 4933417C | -0.28225 | 0.648443 | 0.824888 |
| Slc25a35 | -0.16114 | 0.648288 | 0.824863 |
| Ccdc61   | -0.0994  | 0.648246 | 0.824863 |
| Jag1     | -0.04357 | 0.647959 | 0.824689 |
| 5330431K | -0.16997 | 0.647647 | 0.824398 |
| Unc5c    | -0.2953  | 0.64726  | 0.824132 |
| Csnk2a1  | -0.04159 | 0.647155 | 0.824122 |
| Bves     | -0.25634 | 0.646868 | 0.823949 |
| Zc3hc1   | -0.09535 | 0.64659  | 0.823683 |
| Mier2    | -0.12974 | 0.646454 | 0.823683 |
| Scrn2    | -0.09912 | 0.646187 | 0.82345  |
| Arid4a   | -0.0407  | 0.645875 | 0.823193 |
| Rbm41    | -0.13464 | 0.645582 | 0.82296  |
| Me1      | -0.11077 | 0.644736 | 0.822255 |
| Clcn2    | -0.34481 | 0.644572 | 0.822255 |
| Ruvbl2   | -0.08574 | 0.644098 | 0.821767 |
| Gm4707   | -0.17328 | 0.643897 | 0.82158  |
| Nup205   | -0.11754 | 0.643577 | 0.821312 |
| Fbxo22   | -0.0574  | 0.643332 | 0.82114  |
| Mill2    | -0.06258 | 0.643078 | 0.820955 |
| Gm7435   | -0.33376 | 0.642958 | 0.820942 |
| Gm49152  | -0.28902 | 0.642635 | 0.820684 |
| Fbxl12   | -0.07702 | 0.642646 | 0.820684 |
| Gja1     | -0.04435 | 0.642598 | 0.820684 |
| Lzts3    | -0.22023 | 0.642478 | 0.820684 |
| A730011C | -0.31142 | 0.641155 | 0.819408 |
| Rdh8     | -0.41603 | 0.640534 | 0.818963 |
| Zbtb48   | -0.13382 | 0.640297 | 0.818801 |
| 4632411P | -0.4888  | 0.639963 | 0.818591 |
| 4930430F | -0.10852 | 0.639983 | 0.818591 |
| Smarce1  | -0.04986 | 0.639602 | 0.818331 |
| Gm6612   | -0.22425 | 0.639453 | 0.818235 |
| 5830448L | -0.17746 | 0.639303 | 0.818159 |
| Nptx1    | -0.33786 | 0.639063 | 0.818114 |
| Zfp758   | -0.13317 | 0.639052 | 0.818114 |
| Sik2     | -0.10098 | 0.639038 | 0.818114 |
| Gm42717  | -0.37932 | 0.638842 | 0.818114 |



|           |          |          |          |
|-----------|----------|----------|----------|
| Zfp62     | -0.0643  | 0.638342 | 0.817628 |
| Rgs2      | -0.10622 | 0.638154 | 0.817503 |
| Myo1g     | -0.69218 | 0.636883 | 0.816097 |
| Mcm8      | -0.25479 | 0.636841 | 0.816097 |
| Ipo9      | -0.07585 | 0.636716 | 0.816097 |
| Gm45902   | -0.21476 | 0.636538 | 0.816097 |
| Dtx1      | -0.28999 | 0.636519 | 0.816097 |
| Mrto4     | -0.08159 | 0.63648  | 0.816097 |
| Dpf2      | -0.05419 | 0.636356 | 0.816097 |
| Zc3h11a   | -0.13748 | 0.636174 | 0.816097 |
| Col4a3    | -0.1063  | 0.636152 | 0.816097 |
| 9930111J2 | -0.05405 | 0.635955 | 0.816097 |
| Pigc      | -0.09001 | 0.635551 | 0.815798 |
| D16Ertd47 | -0.068   | 0.634932 | 0.815249 |
| Emg1      | -0.04724 | 0.634856 | 0.815249 |
| Psd2      | -0.43541 | 0.634518 | 0.815095 |
| A130048G  | -0.29983 | 0.633761 | 0.814548 |
| Gm37407   | -0.17265 | 0.633088 | 0.813893 |
| Gm45477   | -0.18833 | 0.633072 | 0.813893 |
| Ccdc88c   | -0.08764 | 0.632868 | 0.813819 |
| Gm47594   | -0.46977 | 0.632865 | 0.813819 |
| Rasal2    | -0.04159 | 0.63277  | 0.813819 |
| Rnf123    | -0.08987 | 0.632732 | 0.813819 |
| Syt7      | -0.07065 | 0.632274 | 0.813524 |
| Gm13778   | -0.43308 | 0.631631 | 0.812927 |
| Chm       | -0.06237 | 0.631193 | 0.812573 |
| Gm9727    | -0.46064 | 0.631067 | 0.81248  |
| Adck5     | -0.13341 | 0.630923 | 0.812434 |
| Aup1      | -0.05469 | 0.630776 | 0.812315 |
| Itpk1     | -0.10461 | 0.630236 | 0.81169  |
| Gm44567   | -0.13426 | 0.629934 | 0.81149  |
| mt-Tw     | -0.23421 | 0.629705 | 0.811425 |
| Wdr82     | -0.0623  | 0.629589 | 0.811346 |
| Tk2       | -0.09904 | 0.629465 | 0.811326 |
| Cib2      | -0.19556 | 0.629391 | 0.811312 |
| Gm48742   | -0.43359 | 0.629331 | 0.811312 |
| Crygc     | -0.16735 | 0.629338 | 0.811312 |
| Wdr53     | -0.11456 | 0.6293   | 0.811312 |
| Abhd18    | -0.09579 | 0.629226 | 0.811312 |
| Lgals1    | -0.05974 | 0.628864 | 0.811312 |
| Sec14l2   | -0.23164 | 0.62887  | 0.811312 |
| Ints1     | -0.09083 | 0.628662 | 0.811198 |
| Lims1     | -0.03807 | 0.628423 | 0.81103  |
| 1810059H  | -0.17615 | 0.628309 | 0.810966 |
| Pi4k2a    | -0.08533 | 0.628258 | 0.810966 |
| A830052D  | -0.44694 | 0.628032 | 0.810875 |
| Gm44636   | -0.43121 | 0.627868 | 0.810732 |

|          |          |          |          |
|----------|----------|----------|----------|
| Ccl3     | -0.42167 | 0.627507 | 0.810541 |
| Map2k7   | -0.07158 | 0.626938 | 0.81002  |
| Zfp113   | -0.11489 | 0.62687  | 0.810002 |
| Gzf1     | -0.08087 | 0.626491 | 0.809653 |
| Odf3b    | -0.13168 | 0.626425 | 0.809638 |
| Gm37297  | -0.17836 | 0.626025 | 0.809399 |
| Sdhaf2   | -0.07723 | 0.625648 | 0.809108 |
| Usp29    | -0.25933 | 0.625402 | 0.808944 |
| Dynlt1a  | -0.12921 | 0.625396 | 0.808944 |
| Gm37529  | -0.25293 | 0.625231 | 0.808902 |
| Gm43935  | -0.48798 | 0.625086 | 0.808814 |
| Sertad2  | -0.04399 | 0.625081 | 0.808814 |
| Gm9844   | -0.16531 | 0.624914 | 0.808731 |
| 0610009E | -0.13011 | 0.624672 | 0.808628 |
| Fam221a  | -0.23001 | 0.624546 | 0.808535 |
| Spns1    | -0.09036 | 0.624273 | 0.808251 |
| Rufy1    | -0.07489 | 0.624225 | 0.808251 |
| Rdh5     | -0.14256 | 0.624165 | 0.808251 |
| Cript    | -0.0464  | 0.624084 | 0.808251 |
| Neu3     | -0.17821 | 0.624002 | 0.808251 |
| Cib1     | -0.07503 | 0.623926 | 0.808251 |
| Slc26a11 | -0.17169 | 0.623669 | 0.808167 |
| Rab39b   | -0.26495 | 0.623471 | 0.808037 |
| Xpo7     | -0.06388 | 0.623234 | 0.807813 |
| Itga7    | -0.08505 | 0.622684 | 0.807241 |
| A930041C | -0.17342 | 0.622134 | 0.806597 |
| Ero1a    | -0.06719 | 0.622129 | 0.806597 |
| Mosmo    | -0.05275 | 0.621776 | 0.806412 |
| 2410004B | -0.0648  | 0.621639 | 0.806305 |
| Slc12a6  | -0.0569  | 0.621633 | 0.806305 |
| Asap2    | -0.06835 | 0.621468 | 0.806292 |
| Snx33    | -0.13569 | 0.621337 | 0.806193 |
| Trmt5    | -0.19099 | 0.621333 | 0.806193 |
| Pde3b    | -0.22266 | 0.62132  | 0.806193 |
| Uso1     | -0.06732 | 0.621237 | 0.806193 |
| Grb2     | -0.04695 | 0.621062 | 0.80614  |
| Cbx1     | -0.03532 | 0.621035 | 0.80614  |
| Gm43389  | -0.28989 | 0.620914 | 0.80614  |
| Gm16701- | -0.401   | 0.620821 | 0.80614  |
| A930014D | -0.47774 | 0.620616 | 0.806026 |
| Zfp873   | -0.19554 | 0.620532 | 0.805986 |
| Ddhd1    | -0.06324 | 0.620264 | 0.805899 |
| Atl1     | -0.12652 | 0.619776 | 0.805424 |
| Mrps25   | -0.06687 | 0.619746 | 0.805424 |
| Rpia     | -0.09869 | 0.619652 | 0.805402 |
| Tmem81   | -0.23357 | 0.619177 | 0.805051 |
| Smg5     | -0.08377 | 0.619165 | 0.805051 |

|           |          |          |          |
|-----------|----------|----------|----------|
| Gm45176   | -0.63883 | 0.618934 | 0.804958 |
| Tmem238   | -0.07437 | 0.618745 | 0.804857 |
| Ctns      | -0.12376 | 0.618603 | 0.804846 |
| Pdk2      | -0.10442 | 0.617907 | 0.804042 |
| Nmb       | -0.16365 | 0.617613 | 0.803729 |
| Gm49096   | -0.68308 | 0.616907 | 0.80302  |
| Ankrd10   | -0.06307 | 0.616888 | 0.80302  |
| Vdac3     | -0.03827 | 0.616134 | 0.802515 |
| Adgrl2    | -0.04427 | 0.616068 | 0.802515 |
| Crcp      | -0.09684 | 0.616061 | 0.802515 |
| 4933433G  | -0.28075 | 0.61577  | 0.802447 |
| Ccdc43    | -0.08349 | 0.615591 | 0.802284 |
| Pomc      | -0.11239 | 0.61534  | 0.802166 |
| Gm43748   | -0.69491 | 0.6151   | 0.802062 |
| Gm38344   | -0.52793 | 0.614976 | 0.802062 |
| Crygd     | -0.26214 | 0.614613 | 0.801707 |
| Elp6      | -0.17656 | 0.614375 | 0.801466 |
| Tom1l1    | -0.39069 | 0.614209 | 0.801459 |
| Daxx      | -0.08597 | 0.614022 | 0.801424 |
| Pax6os1   | -0.26531 | 0.613872 | 0.801298 |
| 4930513N  | -0.30405 | 0.613733 | 0.801187 |
| Gm48139   | -0.09629 | 0.613319 | 0.800778 |
| Hmbox1    | -0.05045 | 0.612839 | 0.800299 |
| Exo5      | -0.17357 | 0.612679 | 0.80023  |
| Atp6v1h   | -0.06617 | 0.612573 | 0.800161 |
| Cfp       | -0.24546 | 0.61236  | 0.800042 |
| Gm9833    | -0.3838  | 0.612353 | 0.800042 |
| Kctd2     | -0.05918 | 0.612375 | 0.800042 |
| Cox20b    | -0.62288 | 0.611986 | 0.799883 |
| Stx16     | -0.0548  | 0.611938 | 0.799883 |
| Lsm10     | -0.08542 | 0.611876 | 0.799883 |
| Gm42658   | -0.38098 | 0.611396 | 0.799845 |
| Rcsd1     | -0.06859 | 0.611286 | 0.799806 |
| Ppp2r2b   | -0.10052 | 0.61109  | 0.799619 |
| Ormdl1    | -0.11554 | 0.610361 | 0.799027 |
| Gm10136   | -0.19561 | 0.610234 | 0.799027 |
| Scgn      | -0.43021 | 0.610188 | 0.799027 |
| Dimt1     | -0.10274 | 0.610044 | 0.798949 |
| Milr1     | -0.43271 | 0.609926 | 0.798864 |
| Gm13316   | -0.75814 | 0.609416 | 0.798462 |
| Phf2      | -0.05827 | 0.609459 | 0.798462 |
| Pcdhgb8   | -0.64596 | 0.609356 | 0.798462 |
| Rd3       | -0.10181 | 0.609333 | 0.798462 |
| Gm9884    | -0.8212  | 0.609167 | 0.798462 |
| Pitpnm2os | -0.21548 | 0.609043 | 0.798405 |
| Zfp612    | -0.16459 | 0.608401 | 0.797704 |
| Fbxl12os  | -0.3442  | 0.608224 | 0.797554 |

|           |          |          |          |
|-----------|----------|----------|----------|
| Msantd4   | -0.06956 | 0.608233 | 0.797554 |
| Rab3ip    | -0.11244 | 0.608182 | 0.797554 |
| Gpkow     | -0.09124 | 0.608025 | 0.797554 |
| Gm7968    | -0.46302 | 0.607768 | 0.797363 |
| Lysmd4    | -0.13926 | 0.607525 | 0.797217 |
| Ppard     | -0.0556  | 0.607233 | 0.79708  |
| Pask      | -0.45069 | 0.607192 | 0.79708  |
| Vps37b    | -0.07364 | 0.606885 | 0.797042 |
| Thap4     | -0.11663 | 0.606824 | 0.797032 |
| Btbd19    | -0.19728 | 0.606411 | 0.79677  |
| Large1    | -0.11348 | 0.606221 | 0.796762 |
| Gm37653   | -0.21967 | 0.605905 | 0.796664 |
| Tmem164   | -0.13285 | 0.605771 | 0.796558 |
| Gabbr2    | -0.51342 | 0.605412 | 0.796366 |
| Pitpnm2   | -0.06074 | 0.604916 | 0.795985 |
| Bub3      | -0.04623 | 0.60469  | 0.795985 |
| Mtm1      | -0.10539 | 0.604671 | 0.795985 |
| Fam13a    | -0.10269 | 0.603685 | 0.79518  |
| Lrrk1     | -0.06586 | 0.603681 | 0.79518  |
| 1600014C: | -0.31045 | 0.60332  | 0.795081 |
| Rab4a     | -0.07789 | 0.60323  | 0.795081 |
| Gm37978   | -0.3546  | 0.603059 | 0.795081 |
| Gm34961   | -0.34885 | 0.60243  | 0.794607 |
| Zfp607a   | -0.16516 | 0.601997 | 0.794316 |
| Cbfa2t3   | -0.03694 | 0.601933 | 0.794301 |
| Lrrc56    | -0.28117 | 0.601737 | 0.794301 |
| Pigw      | -0.27501 | 0.601501 | 0.794249 |
| Med16     | -0.09465 | 0.601001 | 0.793911 |
| 1700003E: | -0.36418 | 0.600754 | 0.79378  |
| Gm11961   | -0.12464 | 0.600136 | 0.793538 |
| Prkci     | -0.09101 | 0.599894 | 0.793499 |
| Copg2     | -0.08509 | 0.599253 | 0.792931 |
| Kcnd1     | -0.53961 | 0.599247 | 0.792931 |
| Mapre1    | -0.03665 | 0.599079 | 0.792911 |
| Zswim9    | -0.14238 | 0.598786 | 0.792664 |
| Dnaaf9    | -0.07056 | 0.59865  | 0.792553 |
| Rab33b    | -0.09032 | 0.598613 | 0.792553 |
| Mllt1     | -0.10955 | 0.598307 | 0.79238  |
| Pdcd11    | -0.07936 | 0.597702 | 0.791999 |
| Fbxo44    | -0.22733 | 0.597631 | 0.791975 |
| Slc13a5   | -0.36444 | 0.597333 | 0.79172  |
| Icmt      | -0.06805 | 0.596933 | 0.79126  |
| Arfrp1    | -0.06821 | 0.596883 | 0.79126  |
| Gm35339   | -0.33999 | 0.596845 | 0.79126  |
| Slc25a47  | -0.31122 | 0.596556 | 0.79104  |
| Gcsh      | -0.07994 | 0.59621  | 0.790792 |
| Ddr1      | -0.15276 | 0.595907 | 0.79053  |

|          |          |          |          |
|----------|----------|----------|----------|
| Frmd3    | -0.42063 | 0.59578  | 0.79044  |
| Btc      | -0.31676 | 0.595786 | 0.79044  |
| Hinfp    | -0.10687 | 0.595766 | 0.79044  |
| Prdm10   | -0.15196 | 0.595596 | 0.790397 |
| Fuz      | -0.11014 | 0.595364 | 0.790199 |
| Gm42549  | -0.24881 | 0.595188 | 0.790136 |
| Gm38057  | -0.28794 | 0.594969 | 0.790136 |
| Inpp4a   | -0.12109 | 0.594531 | 0.789824 |
| Rnpep    | -0.07968 | 0.594176 | 0.78952  |
| Zkscan1  | -0.06936 | 0.593976 | 0.789367 |
| Naa20    | -0.05674 | 0.593843 | 0.78926  |
| Gm43011  | -0.13533 | 0.593568 | 0.789105 |
| Fastk    | -0.08404 | 0.593395 | 0.789101 |
| Phlpp1   | -0.07204 | 0.593341 | 0.789101 |
| Gm7628   | -0.25126 | 0.593227 | 0.789101 |
| Gm4540   | -0.39885 | 0.592995 | 0.788904 |
| Pdrg1    | -0.05924 | 0.592863 | 0.788868 |
| 2610028D | -0.34307 | 0.592741 | 0.788845 |
| Reps2    | -0.35074 | 0.592614 | 0.788817 |
| Mc1r     | -0.30778 | 0.592575 | 0.788817 |
| Gm42967  | -0.37472 | 0.592373 | 0.788636 |
| Aimp2    | -0.11264 | 0.592218 | 0.78857  |
| Pnpt1    | -0.12736 | 0.591899 | 0.788216 |
| Gramd1b  | -0.08766 | 0.591781 | 0.788208 |
| Gm37470  | -0.19098 | 0.591754 | 0.788208 |
| Zfp410   | -0.09336 | 0.591529 | 0.788144 |
| Por      | -0.06434 | 0.591314 | 0.788067 |
| Gm44699  | -0.23588 | 0.59102  | 0.787815 |
| Mtus2    | -0.30716 | 0.590377 | 0.787242 |
| Hikeshi  | -0.06693 | 0.590272 | 0.787242 |
| Alg12    | -0.15808 | 0.590245 | 0.787242 |
| Slc15a4  | -0.1146  | 0.590198 | 0.787242 |
| Gm42684  | -0.12696 | 0.590041 | 0.787242 |
| Hivep3   | -0.14778 | 0.589896 | 0.787229 |
| Ddx55    | -0.10164 | 0.589779 | 0.787143 |
| Cd248    | -0.07643 | 0.589533 | 0.787081 |
| Vps16    | -0.0999  | 0.589101 | 0.786658 |
| Cenpc1   | -0.11621 | 0.58859  | 0.786257 |
| Zkscan14 | -0.12442 | 0.587982 | 0.78566  |
| Dnaaf5   | -0.21105 | 0.58754  | 0.785276 |
| Gm50107  | -0.25795 | 0.587472 | 0.785254 |
| 2900018N | -0.72522 | 0.587231 | 0.785002 |
| Rint1    | -0.09617 | 0.587205 | 0.785002 |
| Rtel1    | -0.19235 | 0.587196 | 0.785002 |
| Enho     | -0.09882 | 0.587004 | 0.784998 |
| Eid1     | -0.0367  | 0.586833 | 0.784961 |
| Arl5b    | -0.08475 | 0.586705 | 0.784859 |

|          |          |          |          |
|----------|----------|----------|----------|
| Tut1     | -0.14314 | 0.585961 | 0.783935 |
| Yipf2    | -0.13653 | 0.585461 | 0.783616 |
| Fyn      | -0.05659 | 0.585377 | 0.783573 |
| Fndc10   | -0.16734 | 0.584913 | 0.783162 |
| Epb41l5  | -0.12583 | 0.584907 | 0.783162 |
| Timm8b   | -0.04798 | 0.584698 | 0.783015 |
| 2610306V | -0.13306 | 0.584623 | 0.782984 |
| Pax6     | -0.1129  | 0.584465 | 0.782968 |
| 5730409E | -0.10334 | 0.584273 | 0.782968 |
| Smc5     | -0.06693 | 0.584191 | 0.782968 |
| Mapre2   | -0.06347 | 0.584107 | 0.782968 |
| Gm5857   | -0.39814 | 0.584049 | 0.782968 |
| Gm43857  | -0.2438  | 0.583993 | 0.782968 |
| Rdh13    | -0.18917 | 0.583471 | 0.782634 |
| Tenm4    | -0.39947 | 0.583322 | 0.782572 |
| Gm45250  | -0.32591 | 0.583266 | 0.782566 |
| Det1     | -0.21632 | 0.583153 | 0.782485 |
| Gstp-ps  | -0.19962 | 0.582984 | 0.782328 |
| Dnajc16  | -0.13354 | 0.582966 | 0.782328 |
| D230049E | -0.24288 | 0.582796 | 0.782217 |
| Thoc1    | -0.06618 | 0.582431 | 0.782077 |
| Kank3    | -0.03281 | 0.582116 | 0.781864 |
| Ap4m1    | -0.10139 | 0.582097 | 0.781864 |
| Atp6v1b2 | -0.06769 | 0.581829 | 0.78179  |
| 9630013D | -0.52315 | 0.581375 | 0.78136  |
| Gps2     | -0.06026 | 0.581344 | 0.78136  |
| Wdr83    | -0.10038 | 0.581159 | 0.781301 |
| Celsr3   | -0.26026 | 0.580845 | 0.781068 |
| Kmt2b    | -0.06712 | 0.580407 | 0.780689 |
| 2310015A | -0.14602 | 0.580075 | 0.780449 |
| Pak1ip1  | -0.05086 | 0.579653 | 0.780306 |
| Blcap    | -0.09468 | 0.5796   | 0.780304 |
| Ash1l    | -0.03561 | 0.579585 | 0.780304 |
| Sox6     | -0.23342 | 0.57915  | 0.780049 |
| Mtap     | -0.08682 | 0.578968 | 0.779944 |
| Tmem8b   | -0.15959 | 0.578921 | 0.779944 |
| Alkbh8   | -0.09767 | 0.578895 | 0.779944 |
| Gm49883  | -0.18167 | 0.578814 | 0.779944 |
| Ctsc     | -0.09286 | 0.578705 | 0.779871 |
| Rbbp5    | -0.11506 | 0.578213 | 0.779278 |
| Gm38056  | -0.29191 | 0.57812  | 0.779223 |
| Gm45137  | -0.33485 | 0.577953 | 0.779181 |
| Rab22a   | -0.06112 | 0.577933 | 0.779181 |
| Zmym2    | -0.06914 | 0.576687 | 0.778062 |
| Zbtb2    | -0.10332 | 0.576375 | 0.777859 |
| Spire2   | -0.58591 | 0.576245 | 0.777859 |
| Pcyt1b   | -0.27647 | 0.575904 | 0.777651 |

|           |          |          |          |
|-----------|----------|----------|----------|
| Api5      | -0.06214 | 0.575914 | 0.777651 |
| Gm37258   | -0.3143  | 0.575813 | 0.777651 |
| Metap1d   | -0.1331  | 0.575737 | 0.777621 |
| Tceal5    | -0.25671 | 0.575338 | 0.777223 |
| Fbxo32    | -0.09843 | 0.575121 | 0.776999 |
| Nemf      | -0.0544  | 0.575043 | 0.776965 |
| Zfp407    | -0.09121 | 0.574588 | 0.77656  |
| Ndufb4c   | -0.31588 | 0.574582 | 0.77656  |
| Dact3     | -0.1431  | 0.574485 | 0.77656  |
| Copg1     | -0.07138 | 0.574416 | 0.776538 |
| Klc4      | -0.11626 | 0.574198 | 0.776454 |
| Mterf3    | -0.08705 | 0.574077 | 0.77636  |
| Enpp5     | -0.09959 | 0.573967 | 0.776281 |
| Camkk2    | -0.09237 | 0.573926 | 0.776281 |
| Guf1      | -0.0945  | 0.573919 | 0.776281 |
| Ccdc77    | -0.15119 | 0.573484 | 0.775838 |
| Pacsin3   | -0.12176 | 0.573314 | 0.775749 |
| 1700094D  | -0.3603  | 0.572992 | 0.775465 |
| Zfp442    | -0.17055 | 0.573001 | 0.775465 |
| Mfap2     | -0.19251 | 0.57286  | 0.775453 |
| Zfp618    | -0.18914 | 0.572668 | 0.775365 |
| Rnf32     | -0.29851 | 0.572645 | 0.775365 |
| Gm14410   | -0.40552 | 0.572252 | 0.774954 |
| Mrps31    | -0.09412 | 0.572261 | 0.774954 |
| Dnmt1     | -0.08138 | 0.571992 | 0.77487  |
| AI506816  | -0.27189 | 0.57172  | 0.774572 |
| Gm9993    | -0.22023 | 0.571413 | 0.774226 |
| Recql5    | -0.17635 | 0.571348 | 0.774208 |
| Ndufa1    | -0.04244 | 0.571165 | 0.77404  |
| Rpl21-ps3 | -0.42715 | 0.571054 | 0.77402  |
| Slc19a1   | -0.08861 | 0.570878 | 0.773922 |
| Ndufb3    | -0.04012 | 0.57084  | 0.773922 |
| Fam117a   | -0.22826 | 0.570732 | 0.773864 |
| 9530056E  | -0.149   | 0.570714 | 0.773864 |
| Notch1    | -0.03353 | 0.570588 | 0.773864 |
| Slc7a8    | -0.22145 | 0.570542 | 0.773864 |
| Usp36     | -0.08038 | 0.570307 | 0.773848 |
| Sema3e    | -0.41797 | 0.569914 | 0.773384 |
| Flvcr1    | -0.15084 | 0.569908 | 0.773384 |
| Ubqln1    | -0.06348 | 0.56991  | 0.773384 |
| Stxbp3    | -0.06851 | 0.569888 | 0.773384 |
| Get1      | -0.12625 | 0.569555 | 0.773318 |
| Eif2s1    | -0.07271 | 0.569419 | 0.773203 |
| Rnf157    | -0.12594 | 0.569325 | 0.773146 |
| Gm37748   | -0.45549 | 0.569198 | 0.773114 |
| Pvt1      | -0.9413  | 0.569143 | 0.773109 |
| Kpna6     | -0.08372 | 0.568539 | 0.772392 |

|           |          |          |          |
|-----------|----------|----------|----------|
| Ttc37     | -0.09421 | 0.568422 | 0.772392 |
| Gm48562   | -0.20589 | 0.568379 | 0.772392 |
| Nup155    | -0.12465 | 0.568358 | 0.772392 |
| Ndufv1    | -0.05545 | 0.568014 | 0.772207 |
| Mtln      | -0.05795 | 0.567989 | 0.772207 |
| Cited1    | -0.4261  | 0.567858 | 0.772204 |
| Tpmt      | -0.14866 | 0.567798 | 0.772192 |
| Fbxo28    | -0.08553 | 0.567695 | 0.772123 |
| Adcyap1r1 | -0.13796 | 0.56765  | 0.772123 |
| Slc6a9    | -0.21173 | 0.567573 | 0.772097 |
| Ppp1cb    | -0.04209 | 0.567468 | 0.772095 |
| Grk4      | -0.1502  | 0.567096 | 0.771799 |
| Smad2     | -0.08423 | 0.566933 | 0.771713 |
| Gm14443   | -0.42863 | 0.566772 | 0.771638 |
| 1700113A  | -0.3251  | 0.566595 | 0.771468 |
| A730046J1 | -0.62258 | 0.566286 | 0.771188 |
| Man2a2    | -0.0646  | 0.566173 | 0.771104 |
| Gnpnat1   | -0.13416 | 0.565641 | 0.77052  |
| Gpr137c   | -0.151   | 0.565428 | 0.770369 |
| Grm3      | -0.19193 | 0.565395 | 0.770369 |
| Gjd2      | -0.17533 | 0.565135 | 0.770181 |
| Gm43677   | -0.3244  | 0.565013 | 0.770084 |
| Gm17021   | -0.42735 | 0.564924 | 0.770033 |
| Dennd3    | -0.0831  | 0.564919 | 0.770033 |
| Cluap1    | -0.11456 | 0.564762 | 0.769953 |
| Gm43768   | -0.33538 | 0.564662 | 0.769886 |
| Nqo2      | -0.12054 | 0.56462  | 0.769886 |
| Pcdhga10  | -0.22529 | 0.56395  | 0.769372 |
| Nsmf      | -0.11064 | 0.563846 | 0.769334 |
| Sarnp     | -0.05129 | 0.563553 | 0.769075 |
| Isy1      | -0.11452 | 0.563447 | 0.769    |
| Ankrd16   | -0.13103 | 0.563292 | 0.768858 |
| Paqr4     | -0.09082 | 0.563261 | 0.768858 |
| Emc8      | -0.07171 | 0.56306  | 0.768682 |
| Fzd1      | -0.1695  | 0.563047 | 0.768682 |
| Sfmbt1    | -0.12439 | 0.562752 | 0.768542 |
| Trmt11    | -0.10512 | 0.562551 | 0.768542 |
| Fcor      | -0.45646 | 0.562489 | 0.768533 |
| Lypla2    | -0.08806 | 0.562383 | 0.768458 |
| Hace1     | -0.11042 | 0.562252 | 0.76842  |
| Zswim1    | -0.1512  | 0.561954 | 0.768223 |
| Gm43860   | -0.461   | 0.561484 | 0.767931 |
| Gm24362   | -0.39818 | 0.561394 | 0.767931 |
| 9530077C  | -0.24779 | 0.561185 | 0.767852 |
| Apex2     | -0.16079 | 0.560416 | 0.7671   |
| Ccdc117   | -0.0902  | 0.560174 | 0.766839 |
| Ocr1      | -0.09628 | 0.559909 | 0.766546 |



|           |          |          |          |
|-----------|----------|----------|----------|
| Gm12097   | -0.32989 | 0.559735 | 0.766379 |
| Arhgef9   | -0.13315 | 0.559339 | 0.766046 |
| Tmem267   | -0.1769  | 0.559147 | 0.765854 |
| Fsd1l     | -0.09236 | 0.559099 | 0.765854 |
| Nscme3l   | -0.44065 | 0.558981 | 0.765854 |
| Tnrc6c    | -0.04526 | 0.558976 | 0.765854 |
| Gm47840   | -0.50564 | 0.558909 | 0.765854 |
| Atp6ap1   | -0.05259 | 0.558781 | 0.765848 |
| C230035I1 | -0.43074 | 0.55822  | 0.765285 |
| Tnks1bp1  | -0.06868 | 0.557483 | 0.764764 |
| Trim67    | -0.31208 | 0.557209 | 0.764739 |
| 4930481B1 | -0.49612 | 0.556966 | 0.764524 |
| Rnf25     | -0.12283 | 0.556988 | 0.764524 |
| Khdc4     | -0.06981 | 0.556675 | 0.764356 |
| Sf3a2     | -0.07837 | 0.55666  | 0.764356 |
| Dolk      | -0.10928 | 0.556465 | 0.764277 |
| Ybx2      | -0.39796 | 0.556337 | 0.76419  |
| Aar2      | -0.1036  | 0.556139 | 0.764041 |
| AV356131  | -0.13393 | 0.556016 | 0.763941 |
| Rnft2     | -0.25567 | 0.555791 | 0.763799 |
| 1500012K1 | -0.80368 | 0.555508 | 0.763628 |
| Ubap2l    | -0.04549 | 0.555504 | 0.763628 |
| Zfp809    | -0.15272 | 0.555457 | 0.763628 |
| Armc5     | -0.12138 | 0.555144 | 0.763585 |
| Zfp444    | -0.09349 | 0.554802 | 0.763254 |
| Lrrd1     | -0.42505 | 0.55438  | 0.762954 |
| Usp19     | -0.06319 | 0.554345 | 0.762954 |
| C1ql3     | -0.1894  | 0.55421  | 0.76286  |
| Dancr     | -0.16999 | 0.55361  | 0.762385 |
| Lsm8      | -0.0652  | 0.553415 | 0.762257 |
| Trim45    | -0.23263 | 0.553269 | 0.762137 |
| 9530082P1 | -0.08773 | 0.553277 | 0.762137 |
| Atg14     | -0.09638 | 0.553161 | 0.762137 |
| Zic5      | -0.09593 | 0.55291  | 0.762052 |
| C330011V  | -0.40473 | 0.552777 | 0.762008 |
| Ccdc173   | -0.18219 | 0.552729 | 0.762008 |
| Arl6      | -0.08649 | 0.551536 | 0.760578 |
| Gm15892   | -0.3966  | 0.551192 | 0.760244 |
| Flywch2   | -0.18696 | 0.551075 | 0.760226 |
| Zcwpw1    | -0.36856 | 0.550874 | 0.760085 |
| Mcrs1     | -0.07753 | 0.550741 | 0.760041 |
| Chrac1    | -0.06262 | 0.550415 | 0.759942 |
| Tmem201   | -0.11469 | 0.550291 | 0.759841 |
| Gm20300   | -0.12788 | 0.550211 | 0.7598   |
| Zmat1     | -0.12859 | 0.549717 | 0.759259 |
| Gm29093   | -0.33459 | 0.549656 | 0.759244 |
| Gm42732   | -0.46319 | 0.549278 | 0.758863 |

|           |          |          |          |
|-----------|----------|----------|----------|
| Cdk5rap1  | -0.15558 | 0.549253 | 0.758863 |
| Ccar2     | -0.12223 | 0.549087 | 0.758738 |
| Gpsm1     | -0.09384 | 0.549062 | 0.758738 |
| Tubgcp2   | -0.10951 | 0.54836  | 0.75802  |
| Trim16    | -0.08265 | 0.548342 | 0.75802  |
| Gins4     | -0.09973 | 0.548086 | 0.757915 |
| Necap1    | -0.09723 | 0.548068 | 0.757915 |
| Tnfrsf8   | -0.63719 | 0.547739 | 0.757696 |
| Exoc2     | -0.07203 | 0.547501 | 0.757526 |
| 3110083C  | -0.7299  | 0.547454 | 0.757526 |
| Tmx2      | -0.08448 | 0.547431 | 0.757526 |
| Ncoa2     | -0.07812 | 0.547419 | 0.757526 |
| Cdhr1     | -0.07982 | 0.547352 | 0.757526 |
| Plgrkt    | -0.07334 | 0.54721  | 0.757473 |
| Lym4      | -0.15403 | 0.546679 | 0.75707  |
| Ndufaf6   | -0.18088 | 0.546498 | 0.757013 |
| Zfp862-ps | -0.10213 | 0.546438 | 0.757013 |
| Cant1     | -0.08843 | 0.546396 | 0.757013 |
| Ccdc91    | -0.08685 | 0.546296 | 0.757013 |
| Elmod1    | -0.14146 | 0.546251 | 0.757013 |
| Gm49759   | -0.26988 | 0.546052 | 0.75692  |
| Slc39a8   | -0.06115 | 0.545585 | 0.756483 |
| Atg4b     | -0.09313 | 0.545474 | 0.756431 |
| Slx4ip    | -0.15323 | 0.54511  | 0.756044 |
| Vps54     | -0.07583 | 0.544953 | 0.756026 |
| Gm36298   | -0.25277 | 0.544937 | 0.756026 |
| Gm43462   | -0.17809 | 0.544691 | 0.755947 |
| Asf1a     | -0.08646 | 0.544572 | 0.755947 |
| Ktn1      | -0.03918 | 0.544466 | 0.755911 |
| Lsm14b    | -0.10979 | 0.544153 | 0.755687 |
| Gm43960   | -0.27935 | 0.54356  | 0.755214 |
| Gm38014   | -0.36528 | 0.54336  | 0.755005 |
| Stxbp1    | -0.05118 | 0.543251 | 0.754924 |
| Ssx2ip    | -0.07567 | 0.543191 | 0.754924 |
| Ndufb8    | -0.04283 | 0.543101 | 0.754924 |
| Gm37137   | -0.31894 | 0.542493 | 0.754431 |
| Rpl19-ps6 | -0.46153 | 0.542418 | 0.754397 |
| Gm15872   | -0.26767 | 0.542365 | 0.754393 |
| Swsap1    | -0.20146 | 0.542079 | 0.754093 |
| Nxf1      | -0.08377 | 0.541903 | 0.754093 |
| Eif4enif1 | -0.0818  | 0.541886 | 0.754093 |
| Gramd2    | -0.13837 | 0.541486 | 0.753661 |
| Klhl41    | -0.65422 | 0.541413 | 0.753629 |
| E2f6      | -0.11877 | 0.541412 | 0.753629 |
| Ezh1      | -0.05816 | 0.540875 | 0.75323  |
| Haus8     | -0.19965 | 0.540838 | 0.75323  |
| Htt       | -0.09525 | 0.540826 | 0.75323  |

|          |          |          |          |
|----------|----------|----------|----------|
| Snx19    | -0.10379 | 0.540636 | 0.753108 |
| Fbxo27   | -0.36108 | 0.540266 | 0.752802 |
| Cdk7     | -0.11011 | 0.540183 | 0.752757 |
| Snai2    | -0.12839 | 0.540167 | 0.752757 |
| Tmed8    | -0.11029 | 0.540149 | 0.752757 |
| Nefl     | -0.2071  | 0.539899 | 0.752712 |
| Gm37569  | -0.25375 | 0.539503 | 0.752403 |
| Nsun6    | -0.11611 | 0.53906  | 0.752229 |
| Dtx3l    | -0.08821 | 0.539019 | 0.752229 |
| Gm44856  | -0.804   | 0.538686 | 0.75186  |
| Foxl2    | -0.07717 | 0.538093 | 0.751351 |
| Dnah9    | -0.47986 | 0.537912 | 0.75127  |
| Foxj1    | -0.50532 | 0.537464 | 0.750854 |
| Plp1     | -0.24073 | 0.537456 | 0.750854 |
| Scara3   | -0.30999 | 0.5372   | 0.750741 |
| Aldh16a1 | -0.13325 | 0.536369 | 0.749745 |
| Lag3     | -0.45327 | 0.536227 | 0.749616 |
| Dmac1    | -0.08458 | 0.53607  | 0.749467 |
| Rpl3l    | -0.20023 | 0.535903 | 0.749373 |
| Lage3    | -0.07679 | 0.535882 | 0.749373 |
| Tctn2    | -0.19961 | 0.535831 | 0.749373 |
| P2rx7    | -0.22032 | 0.535792 | 0.749373 |
| Lins1    | -0.26151 | 0.535789 | 0.749373 |
| Syf2     | -0.04351 | 0.535469 | 0.749186 |
| Zfp120   | -0.13097 | 0.535259 | 0.749016 |
| Gm49156  | -0.62116 | 0.535213 | 0.749016 |
| Prxl2a   | -0.10945 | 0.535212 | 0.749016 |
| Phf1     | -0.07847 | 0.535199 | 0.749016 |
| S100pbb  | -0.10239 | 0.534952 | 0.749016 |
| Dctn6    | -0.0627  | 0.534898 | 0.749016 |
| Zmat5    | -0.08742 | 0.534864 | 0.749016 |
| Washc4   | -0.08272 | 0.534232 | 0.748575 |
| Dmap1    | -0.13177 | 0.534202 | 0.748575 |
| Dync2h1  | -0.14384 | 0.533823 | 0.748282 |
| Ahrr     | -0.28192 | 0.53377  | 0.748282 |
| Ggcx     | -0.17362 | 0.533602 | 0.748182 |
| Telo2    | -0.18179 | 0.53339  | 0.74796  |
| Esf1     | -0.05812 | 0.533319 | 0.74796  |
| Mtpap    | -0.08366 | 0.533121 | 0.747858 |
| Mogat1   | -0.76085 | 0.532582 | 0.747242 |
| Spx      | -0.42082 | 0.532517 | 0.747242 |
| Dusp10   | -0.32292 | 0.532461 | 0.747242 |
| Mto1     | -0.16013 | 0.53226  | 0.747071 |
| Phf24    | -0.38048 | 0.532114 | 0.746935 |
| Rab11b   | -0.04824 | 0.531639 | 0.746436 |
| Gm48505  | -0.36585 | 0.531272 | 0.746436 |
| Prpf8    | -0.05451 | 0.531228 | 0.746436 |

|          |          |          |          |
|----------|----------|----------|----------|
| Pramel12 | -0.16215 | 0.531172 | 0.746436 |
| Hacd2    | -0.10521 | 0.531021 | 0.746436 |
| Pcdhga1  | -0.49192 | 0.530806 | 0.746337 |
| Mrpl21   | -0.07467 | 0.530605 | 0.746146 |
| Adgrv1   | -0.15806 | 0.530346 | 0.745851 |
| Otub1    | -0.07435 | 0.530339 | 0.745851 |
| Snu13    | -0.04844 | 0.530235 | 0.745851 |
| Gm38235  | -0.31509 | 0.530213 | 0.745851 |
| Gm15601  | -0.55452 | 0.529766 | 0.745456 |
| Pcdhga9  | -0.26286 | 0.529627 | 0.74543  |
| Ranbp10  | -0.10526 | 0.5293   | 0.74515  |
| Herc3    | -0.08778 | 0.529227 | 0.745118 |
| Derl2    | -0.07965 | 0.529032 | 0.744984 |
| Prkcd    | -0.14698 | 0.52877  | 0.744824 |
| Pacs1    | -0.0793  | 0.528574 | 0.744619 |
| Ppp1r16a | -0.1506  | 0.528477 | 0.744552 |
| Exog     | -0.23804 | 0.528269 | 0.744329 |
| Chd3     | -0.05654 | 0.528223 | 0.744329 |
| Fndc5    | -0.46286 | 0.528145 | 0.744329 |
| Upp2     | -0.13443 | 0.527692 | 0.744007 |
| Gm43331  | -0.26564 | 0.527524 | 0.74384  |
| Ino80e   | -0.09708 | 0.52748  | 0.74384  |
| Bola3    | -0.0689  | 0.526974 | 0.743344 |
| Pard6g   | -0.12939 | 0.526914 | 0.743329 |
| C130023A | -0.25702 | 0.526769 | 0.743194 |
| Atoh7    | -0.56266 | 0.526383 | 0.74279  |
| Ndufab1  | -0.06191 | 0.526038 | 0.742374 |
| Pmm2     | -0.1258  | 0.525651 | 0.742243 |
| Gm15859  | -0.46236 | 0.525603 | 0.742243 |
| Scaper   | -0.08723 | 0.52554  | 0.74223  |
| Dgcr2    | -0.08267 | 0.524595 | 0.741363 |
| Echdc3   | -0.4603  | 0.524479 | 0.741292 |
| Cngb3    | -0.41794 | 0.524466 | 0.741292 |
| 1600023N | -0.81253 | 0.524366 | 0.741292 |
| Erlin2   | -0.09731 | 0.524347 | 0.741292 |
| Itgb1bp2 | -0.9387  | 0.524162 | 0.741232 |
| Zdhhc2   | -0.12246 | 0.523977 | 0.741142 |
| Fam193a  | -0.0639  | 0.523331 | 0.740578 |
| Brd7     | -0.07209 | 0.523186 | 0.740443 |
| Dynlt1c  | -0.26789 | 0.522811 | 0.740122 |
| Ing3     | -0.09991 | 0.52278  | 0.740122 |
| Bbof1    | -0.28312 | 0.52242  | 0.739847 |
| Gm48225  | -0.18447 | 0.522183 | 0.739626 |
| Eif2ak1  | -0.11945 | 0.522135 | 0.739626 |
| Gm42878  | -0.52893 | 0.521857 | 0.739331 |
| 9330162G | -0.10792 | 0.521704 | 0.739183 |
| Gm38190  | -0.23335 | 0.52138  | 0.738806 |

|           |          |          |          |
|-----------|----------|----------|----------|
| Dgkg      | -0.25113 | 0.521078 | 0.738535 |
| 1700063JC | -0.56379 | 0.520966 | 0.738487 |
| Helq      | -0.20417 | 0.520882 | 0.738472 |
| Zfp248    | -0.15164 | 0.520869 | 0.738472 |
| Tmem98    | -0.07575 | 0.520708 | 0.738472 |
| Stk16     | -0.08838 | 0.520256 | 0.73817  |
| Dclk1     | -0.38187 | 0.520224 | 0.73817  |
| D130062J1 | -0.19529 | 0.520104 | 0.73817  |
| Gpr84     | -1.02917 | 0.519926 | 0.737992 |
| Tusc3     | -0.08169 | 0.519771 | 0.737841 |
| Slc6a15   | -0.43169 | 0.519473 | 0.737628 |
| Gm13665   | -0.64973 | 0.51933  | 0.737504 |
| Cnot11    | -0.10305 | 0.519336 | 0.737504 |
| Med9os    | -0.32033 | 0.519099 | 0.737492 |
| Gm49194   | -0.88059 | 0.518968 | 0.7374   |
| Paxip1    | -0.12445 | 0.518151 | 0.736659 |
| Ddb2      | -0.19507 | 0.517974 | 0.736617 |
| Gm45797   | -0.32537 | 0.517833 | 0.736545 |
| Sox7      | -0.08581 | 0.517656 | 0.736376 |
| Ksr1      | -0.14138 | 0.517485 | 0.736271 |
| Gje1      | -0.60994 | 0.516586 | 0.735341 |
| Fut11     | -0.09369 | 0.516184 | 0.734909 |
| Ralgapb   | -0.08487 | 0.515773 | 0.734463 |
| Snx32     | -0.17592 | 0.515751 | 0.734463 |
| Pdpk1     | -0.08241 | 0.515694 | 0.734463 |
| Rny3      | -0.36022 | 0.515527 | 0.734393 |
| Igdcc4    | -0.70738 | 0.515377 | 0.73432  |
| Ppp4r2    | -0.06524 | 0.514989 | 0.733976 |
| Evc2      | -0.3015  | 0.514868 | 0.733873 |
| Itga9     | -0.35971 | 0.514758 | 0.733786 |
| Gm9517    | -0.79966 | 0.514727 | 0.733786 |
| Scg5      | -0.10922 | 0.514431 | 0.73346  |
| Trim61    | -0.86578 | 0.51411  | 0.733071 |
| Tyw1      | -0.15985 | 0.513825 | 0.732875 |
| Pikfyve   | -0.10299 | 0.513688 | 0.732818 |
| Gm45153   | -0.39191 | 0.513601 | 0.7328   |
| Zadh2     | -0.09353 | 0.513625 | 0.7328   |
| B430319G  | -0.2585  | 0.513614 | 0.7328   |
| Tnpo2     | -0.12487 | 0.513565 | 0.7328   |
| Usp25     | -0.05589 | 0.513525 | 0.7328   |
| Gas2      | -0.26169 | 0.513471 | 0.7328   |
| Tbc1d13   | -0.13501 | 0.513454 | 0.7328   |
| Rbm12b2   | -0.15798 | 0.513403 | 0.7328   |
| Gls2      | -0.42225 | 0.513072 | 0.7328   |
| Ccdc137   | -0.15114 | 0.513101 | 0.7328   |
| Ppil6     | -0.2526  | 0.512933 | 0.7328   |
| Kcnd3     | -0.55176 | 0.512891 | 0.7328   |

|          |          |          |          |
|----------|----------|----------|----------|
| Fbxl19   | -0.21238 | 0.512626 | 0.732631 |
| Zfp385b  | -0.20579 | 0.512419 | 0.732546 |
| Neurl4   | -0.11974 | 0.512001 | 0.732226 |
| Arhgef40 | -0.11051 | 0.511864 | 0.732223 |
| Dpysl5   | -0.43321 | 0.511813 | 0.732223 |
| Gm47573  | -0.65444 | 0.511786 | 0.732223 |
| Zfp74    | -0.1215  | 0.511629 | 0.732223 |
| Gtf2h3   | -0.18151 | 0.511547 | 0.732223 |
| Idh3a    | -0.09446 | 0.511303 | 0.732182 |
| Mrpl18   | -0.06852 | 0.511157 | 0.732138 |
| Sdha     | -0.05016 | 0.51108  | 0.732098 |
| Ube2w    | -0.08971 | 0.510772 | 0.731728 |
| Dnajc2   | -0.09246 | 0.510294 | 0.731322 |
| Gm9918   | -0.26935 | 0.509875 | 0.730932 |
| Clcn7    | -0.12434 | 0.509779 | 0.730863 |
| Fem1b    | -0.09159 | 0.509762 | 0.730863 |
| Chgb     | -0.18521 | 0.509305 | 0.730464 |
| Zfp660   | -0.20743 | 0.509242 | 0.730444 |
| Dtna     | -0.21864 | 0.509061 | 0.730363 |
| Dmxl2    | -0.09361 | 0.508963 | 0.730349 |
| 2900076A | -0.19292 | 0.508795 | 0.730223 |
| Cabp5    | -0.38732 | 0.508543 | 0.729982 |
| Sec24b   | -0.08525 | 0.508457 | 0.729957 |
| Ccar1    | -0.05897 | 0.508218 | 0.729815 |
| Gm5466   | -0.55644 | 0.508017 | 0.729661 |
| Zbtb6    | -0.12275 | 0.507772 | 0.729453 |
| Cldn7    | -0.63053 | 0.507601 | 0.72941  |
| Trdmt1   | -0.16031 | 0.507527 | 0.729382 |
| Phf3     | -0.05637 | 0.507506 | 0.729382 |
| Samd4b   | -0.07472 | 0.50741  | 0.729354 |
| Gm32856  | -0.38884 | 0.507292 | 0.729323 |
| Ergic1   | -0.12191 | 0.507065 | 0.729068 |
| Zfp12    | -0.15008 | 0.505913 | 0.7279   |
| Zfp65    | -0.2018  | 0.505734 | 0.727712 |
| Cul7     | -0.13117 | 0.505293 | 0.727281 |
| Ddx10    | -0.10308 | 0.505299 | 0.727281 |
| Golga2   | -0.09656 | 0.505277 | 0.727281 |
| Gm43923  | -0.13624 | 0.505268 | 0.727281 |
| Mrps22   | -0.16224 | 0.504808 | 0.727079 |
| Gm37307  | -0.5973  | 0.50474  | 0.727068 |
| Sec22b   | -0.07523 | 0.504752 | 0.727068 |
| Pitpnm1  | -0.0862  | 0.504501 | 0.726847 |
| Clrn1    | -0.50795 | 0.504365 | 0.726831 |
| Dixdc1   | -0.08076 | 0.504315 | 0.726831 |
| Tmem132  | -0.17682 | 0.50431  | 0.726831 |
| Phtf2    | -0.21534 | 0.504153 | 0.726806 |
| Kars     | -0.08544 | 0.504149 | 0.726806 |

|          |          |          |          |
|----------|----------|----------|----------|
| Lgr4     | -0.20116 | 0.503082 | 0.72578  |
| Rhot2    | -0.10304 | 0.503024 | 0.725766 |
| Aqp5     | -0.42384 | 0.502915 | 0.725678 |
| Gid8     | -0.09799 | 0.502672 | 0.725398 |
| Alkbh4   | -0.23931 | 0.502635 | 0.725398 |
| 9030407P | -0.43353 | 0.5026   | 0.725398 |
| Phf7     | -0.1704  | 0.502602 | 0.725398 |
| Dclre1c  | -0.25034 | 0.502415 | 0.725371 |
| 1700041G | -0.37229 | 0.502129 | 0.725103 |
| Eef1e1   | -0.12862 | 0.501882 | 0.724887 |
| 1500004A | -0.31469 | 0.501819 | 0.724866 |
| Gm12607  | -0.26969 | 0.501676 | 0.724799 |
| Msantd2  | -0.11119 | 0.501567 | 0.724711 |
| 6820431F | -0.04957 | 0.500759 | 0.723683 |
| Me3      | -0.19944 | 0.50059  | 0.723633 |
| Trim9    | -0.18558 | 0.500553 | 0.723633 |
| Med13    | -0.06126 | 0.500478 | 0.723633 |
| Slc1a7   | -0.18684 | 0.499427 | 0.722736 |
| Wdpcp    | -0.28601 | 0.499231 | 0.722529 |
| Ankle2   | -0.09707 | 0.499236 | 0.722529 |
| Mical3   | -0.10706 | 0.499122 | 0.722529 |
| Eps8l1   | -0.30991 | 0.498835 | 0.722302 |
| Tmem87a  | -0.11933 | 0.498707 | 0.722302 |
| Rnf26    | -0.16344 | 0.498405 | 0.722164 |
| Mkrn2os  | -0.61618 | 0.498094 | 0.721929 |
| Tnr      | -0.8265  | 0.497975 | 0.72189  |
| Slc2a8   | -0.18574 | 0.49775  | 0.721634 |
| Nod1     | -0.0887  | 0.497714 | 0.721634 |
| Poc1a    | -0.36287 | 0.497607 | 0.721566 |
| Eefsec   | -0.17084 | 0.497429 | 0.721377 |
| Dynlrb1  | -0.04633 | 0.497343 | 0.721324 |
| Zfp426   | -0.15075 | 0.497304 | 0.721324 |
| Apoc1    | -0.33995 | 0.496957 | 0.720973 |
| Fbxo38   | -0.11414 | 0.496941 | 0.720973 |
| Col9a2   | -0.67278 | 0.49686  | 0.720972 |
| 1700034H | -0.4986  | 0.496787 | 0.720936 |
| Med11    | -0.16184 | 0.496692 | 0.720867 |
| Frs2     | -0.10816 | 0.496458 | 0.720782 |
| Rsph9    | -0.3889  | 0.496395 | 0.720782 |
| Il17rc   | -0.1463  | 0.496299 | 0.720717 |
| Sowaha   | -0.29986 | 0.495802 | 0.720064 |
| Zfp953   | -0.24969 | 0.495538 | 0.71989  |
| Tm6sf1   | -0.06656 | 0.495023 | 0.719282 |
| Awat2    | -0.98688 | 0.494663 | 0.718898 |
| Cdkn1c   | -0.06576 | 0.494644 | 0.718898 |
| Senp5    | -0.10867 | 0.494191 | 0.718351 |
| Fbxl7    | -0.0876  | 0.494011 | 0.718207 |

|           |          |          |          |
|-----------|----------|----------|----------|
| Snx5      | -0.07773 | 0.493819 | 0.718091 |
| Abhd3     | -0.29108 | 0.493015 | 0.717199 |
| Ugp2      | -0.0814  | 0.492875 | 0.717136 |
| Pick1     | -0.16383 | 0.492522 | 0.716761 |
| Fam8a1    | -0.08704 | 0.492293 | 0.71658  |
| Zbtb41    | -0.10214 | 0.492259 | 0.71658  |
| A530083I2 | -0.54212 | 0.491782 | 0.716242 |
| Gm49971   | -0.25031 | 0.490845 | 0.715155 |
| Gm42696   | -0.36951 | 0.490702 | 0.715017 |
| 9530062Kl | -0.53858 | 0.490567 | 0.714959 |
| Zfp324    | -0.2364  | 0.490388 | 0.714767 |
| Fam120c   | -0.27972 | 0.490141 | 0.714476 |
| Gm48138   | -0.17591 | 0.48989  | 0.71418  |
| Araf      | -0.07147 | 0.489654 | 0.713907 |
| Cdk12     | -0.0637  | 0.489654 | 0.713907 |
| Kat8      | -0.12896 | 0.489557 | 0.713904 |
| Casz1     | -0.08895 | 0.489553 | 0.713904 |
| Cxcl14    | -0.40437 | 0.489329 | 0.71378  |
| Klhl25    | -0.18599 | 0.489275 | 0.713771 |
| Elavl3    | -0.49822 | 0.489244 | 0.713771 |
| Gm35721   | -0.96614 | 0.489098 | 0.713771 |
| Gm29107   | -0.16856 | 0.488795 | 0.713557 |
| Cars2     | -0.15052 | 0.488608 | 0.713354 |
| Tra2a     | -0.04822 | 0.488331 | 0.713018 |
| 5330434G  | -0.52911 | 0.487955 | 0.712608 |
| Rraga     | -0.06567 | 0.487881 | 0.71257  |
| Sostdc1   | -0.91598 | 0.487669 | 0.712399 |
| Slc25a4   | -0.03864 | 0.487503 | 0.712295 |
| Dusp14    | -0.26115 | 0.487385 | 0.712262 |
| Tmod2     | -0.12051 | 0.487183 | 0.712036 |
| Lurap1l   | -0.11604 | 0.486903 | 0.711767 |
| Scamp2    | -0.09613 | 0.486885 | 0.711767 |
| Lzts2     | -0.07749 | 0.486641 | 0.711703 |
| Meaf6     | -0.10499 | 0.486603 | 0.711703 |
| Thap7     | -0.12167 | 0.486471 | 0.711703 |
| Iqcg      | -0.37542 | 0.486035 | 0.711376 |
| Dcaf1     | -0.1044  | 0.485928 | 0.711376 |
| Calm1     | -0.02481 | 0.485853 | 0.711365 |
| Kcnj2     | -0.16301 | 0.485868 | 0.711365 |
| Gm48880   | -0.29463 | 0.485755 | 0.711365 |
| Gm47484   | -0.57505 | 0.485618 | 0.711279 |
| Tcp11     | -0.33183 | 0.485289 | 0.711003 |
| Gm3604    | -0.54915 | 0.484874 | 0.710674 |
| Trir      | -0.04984 | 0.484806 | 0.710644 |
| Madd      | -0.08979 | 0.484448 | 0.710398 |
| Park7     | -0.04307 | 0.484103 | 0.71005  |
| Gm37060   | -0.11188 | 0.484046 | 0.71005  |



|           |          |          |          |
|-----------|----------|----------|----------|
| Gm36989   | -0.27149 | 0.484011 | 0.71005  |
| Prkaa2    | -0.21189 | 0.483978 | 0.71005  |
| Ddx31     | -0.27913 | 0.483974 | 0.71005  |
| Plaat1    | -0.52388 | 0.483804 | 0.71005  |
| Atp6v0d1  | -0.07795 | 0.483808 | 0.71005  |
| Gm9895    | -0.29299 | 0.483625 | 0.71005  |
| Grhl1     | -0.47267 | 0.483597 | 0.71005  |
| 4932422M  | -0.39064 | 0.483337 | 0.71005  |
| Gm50240   | -0.10963 | 0.483326 | 0.71005  |
| Zc2hc1a   | -0.0943  | 0.482723 | 0.709745 |
| Dscaml1   | -0.18109 | 0.482685 | 0.709745 |
| 1700029I1 | -0.71366 | 0.482699 | 0.709745 |
| A930024E1 | -0.36845 | 0.482365 | 0.709637 |
| Gm9077    | -0.74499 | 0.482198 | 0.709566 |
| Ctnnd2    | -0.32866 | 0.48227  | 0.709566 |
| Rpe       | -0.14159 | 0.482237 | 0.709566 |
| Zfp606    | -0.14654 | 0.482018 | 0.709474 |
| Tsen2     | -0.15446 | 0.481797 | 0.709326 |
| Mapk4     | -0.37314 | 0.481652 | 0.709284 |
| Pak2      | -0.04573 | 0.481484 | 0.709106 |
| Carmil3   | -0.34148 | 0.48145  | 0.709106 |
| Ggt7      | -0.24512 | 0.481328 | 0.709017 |
| P3h3      | -0.1544  | 0.481305 | 0.709017 |
| Ap2a1     | -0.0801  | 0.480973 | 0.708733 |
| Rttn      | -0.18401 | 0.480771 | 0.708544 |
| Lsm6      | -0.06985 | 0.480759 | 0.708544 |
| Enpp3     | -0.19953 | 0.4806   | 0.708432 |
| 7SK-298   | -0.69005 | 0.480453 | 0.708284 |
| Pex10     | -0.18656 | 0.480439 | 0.708284 |
| H2ac18    | -0.25343 | 0.480361 | 0.708284 |
| Wscd2     | -0.99333 | 0.480078 | 0.708081 |
| Gria4     | -0.41237 | 0.480129 | 0.708086 |
| Rtn4ip1   | -0.34414 | 0.479821 | 0.707879 |
| Kcnq4     | -0.27715 | 0.479615 | 0.707844 |
| Gas7      | -0.22291 | 0.47946  | 0.707727 |
| Bbs1      | -0.18309 | 0.479273 | 0.70752  |
| Myt1l     | -0.57431 | 0.47881  | 0.707186 |
| Pam       | -0.06621 | 0.478795 | 0.707186 |
| Anks3     | -0.12803 | 0.47877  | 0.707186 |
| Tmem184l  | -0.06563 | 0.478676 | 0.707186 |
| Svop      | -0.36586 | 0.478638 | 0.707186 |
| Tmem47    | -0.15189 | 0.478492 | 0.707186 |
| Ippk      | -0.14553 | 0.478387 | 0.707186 |
| Stxbp6    | -0.17776 | 0.478339 | 0.707186 |
| B230319C1 | -0.55924 | 0.478229 | 0.707186 |
| Wdr13     | -0.11365 | 0.478101 | 0.707116 |
| Mapk10    | -0.28905 | 0.478066 | 0.707116 |

|           |          |          |          |
|-----------|----------|----------|----------|
| Hltf      | -0.10148 | 0.477822 | 0.706912 |
| Gps1      | -0.08225 | 0.477777 | 0.706912 |
| Wdr24     | -0.22913 | 0.477586 | 0.706703 |
| Ror1      | -0.20732 | 0.477561 | 0.706703 |
| Ptpsr     | -0.10426 | 0.477446 | 0.706703 |
| Impa1     | -0.08742 | 0.477106 | 0.706271 |
| Gm45360   | -0.86834 | 0.476891 | 0.706097 |
| Gigyf1    | -0.07846 | 0.476894 | 0.706097 |
| Ankra2    | -0.10884 | 0.476885 | 0.706097 |
| Cyfip1    | -0.05409 | 0.476866 | 0.706097 |
| B230220B  | -0.25361 | 0.476868 | 0.706097 |
| Slc7a11   | -0.5908  | 0.476605 | 0.706018 |
| Josd1     | -0.12378 | 0.476582 | 0.706018 |
| Ep300     | -0.064   | 0.476456 | 0.705938 |
| Gosr1     | -0.1076  | 0.476319 | 0.705938 |
| Spred1    | -0.08063 | 0.475866 | 0.705692 |
| Sirt4     | -0.17005 | 0.475147 | 0.705272 |
| Sh2d5     | -0.47558 | 0.475065 | 0.705272 |
| Nup35     | -0.14192 | 0.475017 | 0.705271 |
| Rasa2     | -0.09133 | 0.474254 | 0.704278 |
| Tapbp     | -0.05331 | 0.47389  | 0.703947 |
| Prox2     | -0.34645 | 0.47374  | 0.703934 |
| Dubr      | -0.11383 | 0.473709 | 0.703934 |
| Plppr4    | -0.25681 | 0.473676 | 0.703934 |
| Mybl2     | -0.61435 | 0.472837 | 0.703011 |
| Eef1akmt2 | -0.13662 | 0.472746 | 0.702945 |
| Gm44704   | -0.44064 | 0.472367 | 0.702772 |
| Tmem42    | -0.16837 | 0.472409 | 0.702772 |
| Prdm8     | -0.22249 | 0.472014 | 0.702644 |
| Malat1    | -0.03524 | 0.471653 | 0.702437 |
| Gja4      | -0.09029 | 0.471276 | 0.702285 |
| Gm47140   | -0.90797 | 0.470851 | 0.70173  |
| Rundc3b   | -0.53944 | 0.47003  | 0.701205 |
| Nipa1     | -0.17208 | 0.469698 | 0.700919 |
| Dido1     | -0.08331 | 0.469635 | 0.700919 |
| Hspbp1    | -0.17977 | 0.469427 | 0.700794 |
| Rps19bp1  | -0.10675 | 0.469329 | 0.700794 |
| Gm9967    | -0.70215 | 0.468986 | 0.700485 |
| Zfp143    | -0.13126 | 0.468865 | 0.700442 |
| Armc8     | -0.09668 | 0.468495 | 0.699961 |
| Gm49463   | -0.42566 | 0.467915 | 0.699304 |
| Cryba4    | -0.35819 | 0.467899 | 0.699304 |
| Mrps14    | -0.05962 | 0.467788 | 0.699254 |
| Alg14     | -0.09651 | 0.467556 | 0.699115 |
| Atp11b    | -0.06314 | 0.467541 | 0.699115 |
| Exosc10   | -0.10285 | 0.467525 | 0.699115 |
| Kif22     | -0.50111 | 0.467527 | 0.699115 |

|           |          |          |          |
|-----------|----------|----------|----------|
| Gm47585   | -0.29483 | 0.467439 | 0.699115 |
| Fam13b    | -0.12373 | 0.466938 | 0.698711 |
| Gpaa1     | -0.1211  | 0.466844 | 0.698711 |
| 9430031Kl | -0.35032 | 0.466715 | 0.698697 |
| H4c8      | -0.19911 | 0.466695 | 0.698697 |
| Gm42876   | -0.6752  | 0.466539 | 0.698648 |
| Atf6b     | -0.12741 | 0.466543 | 0.698648 |
| Afg1l     | -0.2196  | 0.466048 | 0.698326 |
| Klhl11    | -0.189   | 0.465741 | 0.698006 |
| Nprl2     | -0.17531 | 0.465498 | 0.697781 |
| Itpr1     | -0.0672  | 0.465399 | 0.697703 |
| Rcc1l     | -0.26869 | 0.465239 | 0.697562 |
| Gm43182   | -0.70545 | 0.46512  | 0.697562 |
| Efr3a     | -0.07525 | 0.465204 | 0.697562 |
| Vps26c    | -0.16253 | 0.465115 | 0.697562 |
| Mcf2      | -0.59221 | 0.465074 | 0.697562 |
| Pitpnc1   | -0.05306 | 0.464888 | 0.697495 |
| Echs1     | -0.09391 | 0.46488  | 0.697495 |
| Lysmd1    | -0.25855 | 0.464753 | 0.697495 |
| Fam107b   | -0.12984 | 0.464691 | 0.697479 |
| Ube2ql1   | -0.64871 | 0.46466  | 0.697479 |
| Slc37a3   | -0.14739 | 0.464241 | 0.697013 |
| Gm5915    | -0.43015 | 0.463768 | 0.696792 |
| Rfc1      | -0.07178 | 0.463345 | 0.696507 |
| Gm47260   | -0.42617 | 0.463159 | 0.696296 |
| Rpap1     | -0.1855  | 0.462772 | 0.696204 |
| Rnf215    | -0.08615 | 0.462559 | 0.695963 |
| Gm37274   | -0.23558 | 0.462249 | 0.695626 |
| Gm12002   | -0.22358 | 0.462055 | 0.695405 |
| Cops5     | -0.08078 | 0.461755 | 0.695163 |
| Tmem183i  | -0.10378 | 0.461482 | 0.694961 |
| Naalad2   | -0.10414 | 0.46128  | 0.694794 |
| Gm15186   | -0.36556 | 0.461113 | 0.694685 |
| Prkcb     | -0.15531 | 0.460937 | 0.69449  |
| Fmn2      | -0.87349 | 0.460696 | 0.694342 |
| Ppm1f     | -0.08876 | 0.460632 | 0.694342 |
| Adamts5   | -0.31039 | 0.460592 | 0.694342 |
| Gm37334   | -0.22096 | 0.460002 | 0.693707 |
| Gm16401   | -0.72274 | 0.459914 | 0.693654 |
| Cspp1     | -0.08074 | 0.459919 | 0.693654 |
| Cenpo     | -0.32312 | 0.45949  | 0.693217 |
| Srrm3     | -0.2082  | 0.459448 | 0.693217 |
| Sft2d3    | -0.09982 | 0.459354 | 0.693152 |
| Rab14     | -0.04104 | 0.459273 | 0.693099 |
| Brca1     | -0.43753 | 0.458758 | 0.692604 |
| Bzw2      | -0.11694 | 0.458704 | 0.692604 |
| Rab4b     | -0.32161 | 0.458639 | 0.692604 |

|           |          |          |          |
|-----------|----------|----------|----------|
| Il18      | -0.27857 | 0.458187 | 0.692432 |
| Hook3     | -0.05042 | 0.457781 | 0.691894 |
| Tsc2      | -0.11169 | 0.457558 | 0.691626 |
| Epg5      | -0.19459 | 0.457416 | 0.691482 |
| Zfp354c   | -0.18378 | 0.457277 | 0.691411 |
| Rhot1     | -0.07987 | 0.457252 | 0.691411 |
| Gm37490   | -0.36575 | 0.457075 | 0.691345 |
| Arhgap21  | -0.10449 | 0.456762 | 0.691121 |
| Pnpla8    | -0.06728 | 0.456621 | 0.690977 |
| P4htm     | -0.17682 | 0.456571 | 0.690977 |
| Pi16      | -0.21847 | 0.456562 | 0.690977 |
| Gm49066   | -0.19592 | 0.455791 | 0.69035  |
| Trip6     | -0.13508 | 0.455781 | 0.69035  |
| Gm42913   | -0.92967 | 0.455597 | 0.690195 |
| Trmo      | -0.27882 | 0.45557  | 0.690195 |
| Gcc2      | -0.08065 | 0.455398 | 0.690103 |
| Leng9     | -0.16498 | 0.455297 | 0.690021 |
| Gm37967   | -0.41956 | 0.454886 | 0.689705 |
| St18      | -0.77484 | 0.454712 | 0.68956  |
| Ankrd44   | -0.12428 | 0.454649 | 0.68956  |
| Kpna1     | -0.09842 | 0.45459  | 0.68956  |
| Hmgb1-rs1 | -0.43293 | 0.454537 | 0.68956  |
| Crb1      | -0.1213  | 0.454245 | 0.689336 |
| 6720464F2 | -0.20597 | 0.453723 | 0.68868  |
| Cop1      | -0.08871 | 0.453703 | 0.68868  |
| Isg20l2   | -0.14624 | 0.453606 | 0.68868  |
| Pdlim5    | -0.05197 | 0.453469 | 0.688677 |
| Ndufaf1   | -0.18698 | 0.453455 | 0.688677 |
| Gm37212   | -0.67226 | 0.452139 | 0.687041 |
| Kdm4a     | -0.13787 | 0.452048 | 0.687041 |
| Dpysl3    | -0.14982 | 0.451792 | 0.686863 |
| Yrdc      | -0.11604 | 0.451774 | 0.686863 |
| Trib2     | -0.07801 | 0.451146 | 0.68609  |
| Cyth3     | -0.05775 | 0.45074  | 0.685682 |
| Usp15     | -0.08409 | 0.450489 | 0.68544  |
| Cdc40     | -0.07973 | 0.4499   | 0.684681 |
| 4930578N  | -0.30942 | 0.449763 | 0.684612 |
| Pcgf5     | -0.10602 | 0.449691 | 0.684612 |
| Cwf19l1   | -0.20583 | 0.449464 | 0.684436 |
| Lrguk     | -0.55943 | 0.449094 | 0.683942 |
| Snrpn     | -0.17984 | 0.448835 | 0.683826 |
| Gm45328   | -0.93157 | 0.448617 | 0.683564 |
| Ube2k     | -0.06487 | 0.448123 | 0.682949 |
| Gm44022   | -0.19113 | 0.447971 | 0.682858 |
| Nmt2      | -0.11441 | 0.44702  | 0.681684 |
| Gm17057   | -0.54302 | 0.446696 | 0.68133  |
| Actr5     | -0.18862 | 0.446686 | 0.68133  |

|          |          |          |          |
|----------|----------|----------|----------|
| Tmem87b  | -0.08831 | 0.445949 | 0.680398 |
| Poc5     | -0.15299 | 0.445733 | 0.680208 |
| Zfp266   | -0.08526 | 0.445537 | 0.680095 |
| Pdcl     | -0.0966  | 0.445498 | 0.680095 |
| Nudt13   | -0.12942 | 0.445007 | 0.679585 |
| Lrrcc1   | -0.11243 | 0.44484  | 0.679468 |
| Slc35e3  | -0.22364 | 0.444557 | 0.679174 |
| Gm13066  | -0.8026  | 0.444402 | 0.679007 |
| Mt3      | -0.1324  | 0.444266 | 0.678869 |
| Ndufa10  | -0.07024 | 0.444188 | 0.678819 |
| Btd      | -0.12512 | 0.44416  | 0.678819 |
| Nipal2   | -0.352   | 0.444021 | 0.678771 |
| D3Ert751 | -0.17444 | 0.443737 | 0.678476 |
| Gm34220  | -0.20249 | 0.443426 | 0.678139 |
| Gm12350  | -0.24053 | 0.443352 | 0.678095 |
| 93301620 | -0.46176 | 0.442966 | 0.677573 |
| Gm37420  | -0.23492 | 0.442759 | 0.677516 |
| Lmnb2    | -0.22495 | 0.442646 | 0.677429 |
| Gm44041  | -0.49219 | 0.442438 | 0.67725  |
| Usp40    | -0.12924 | 0.442059 | 0.676739 |
| Taf8     | -0.17176 | 0.442024 | 0.676739 |
| Gm43287  | -0.99302 | 0.440693 | 0.675269 |
| Rnd3     | -0.1643  | 0.440606 | 0.675205 |
| Cdk5     | -0.1538  | 0.440572 | 0.675205 |
| Repin1   | -0.18013 | 0.440304 | 0.675018 |
| Gm17259  | -0.32439 | 0.440282 | 0.675018 |
| Hibadh   | -0.09093 | 0.439934 | 0.674727 |
| Pex6     | -0.13176 | 0.439683 | 0.67455  |
| Tmem70   | -0.13004 | 0.439557 | 0.674426 |
| Elp4     | -0.15779 | 0.439468 | 0.674359 |
| Tmem109  | -0.06867 | 0.438957 | 0.673782 |
| Lmbrd2   | -0.13139 | 0.438897 | 0.673759 |
| Reep4    | -0.22575 | 0.43879  | 0.673664 |
| Nr2e1    | -0.31337 | 0.438786 | 0.673664 |
| Zbtb5    | -0.1883  | 0.438554 | 0.673508 |
| Tmem29   | -0.20596 | 0.438386 | 0.673323 |
| Gm26575  | -0.97787 | 0.43807  | 0.67311  |
| Pogz     | -0.11199 | 0.438049 | 0.67311  |
| Gm44597  | -0.77525 | 0.437902 | 0.67299  |
| Kcnab1   | -0.38975 | 0.437743 | 0.672815 |
| Tbc1d7   | -0.21914 | 0.437476 | 0.672543 |
| Ipo4     | -0.18553 | 0.437219 | 0.672493 |
| Mapk8ip1 | -0.22656 | 0.436901 | 0.672073 |
| Ccr9     | -0.48575 | 0.436767 | 0.671935 |
| Abhd1    | -0.35583 | 0.436743 | 0.671935 |
| Ncapg2   | -0.37201 | 0.436671 | 0.671927 |
| Stam     | -0.11622 | 0.436534 | 0.671853 |

|          |          |          |          |
|----------|----------|----------|----------|
| Far1     | -0.09437 | 0.436232 | 0.671457 |
| Dnmt3a   | -0.10292 | 0.436145 | 0.671447 |
| Smpd2    | -0.13375 | 0.435749 | 0.67099  |
| Gm44095  | -0.26677 | 0.435595 | 0.67099  |
| Chrna5   | -0.9136  | 0.435063 | 0.67038  |
| Btbd9    | -0.11025 | 0.43503  | 0.67038  |
| Xab2     | -0.13097 | 0.434925 | 0.67038  |
| Dusp26   | -0.49015 | 0.434848 | 0.67038  |
| Tdp2     | -0.1222  | 0.434733 | 0.67038  |
| Tab3     | -0.18629 | 0.434724 | 0.67038  |
| Zfp608   | -0.13578 | 0.434635 | 0.670377 |
| Gm39302  | -1.02133 | 0.434473 | 0.670218 |
| Arxes1   | -0.28834 | 0.434487 | 0.670218 |
| Pip4k2b  | -0.14145 | 0.434375 | 0.670218 |
| 1810009A | -0.2522  | 0.433622 | 0.669505 |
| Mast3    | -0.23188 | 0.433547 | 0.669458 |
| Ttc33    | -0.11031 | 0.433542 | 0.669458 |
| Pced1a   | -0.31099 | 0.433265 | 0.669174 |
| Kcnma1   | -0.4675  | 0.433273 | 0.669174 |
| Stradb   | -0.18471 | 0.433204 | 0.669174 |
| Akr7a5   | -0.14202 | 0.433135 | 0.669174 |
| Rrp12    | -0.39006 | 0.433017 | 0.669174 |
| Smarcal1 | -0.17112 | 0.432698 | 0.668906 |
| Zfp595   | -0.22333 | 0.431669 | 0.667866 |
| Gm3764   | -0.62565 | 0.431293 | 0.667423 |
| Ate1     | -0.08216 | 0.43114  | 0.667362 |
| Dcaf8    | -0.069   | 0.431103 | 0.667362 |
| Mtg2     | -0.1601  | 0.431047 | 0.667362 |
| Vamp3    | -0.07092 | 0.430955 | 0.667362 |
| Cdc16    | -0.12209 | 0.430901 | 0.667362 |
| Slc25a16 | -0.13368 | 0.430299 | 0.666573 |
| Maco1    | -0.08164 | 0.429963 | 0.66626  |
| Ecd      | -0.13307 | 0.42991  | 0.66626  |
| Apex1    | -0.20934 | 0.429862 | 0.66626  |
| Insm1    | -0.26868 | 0.429576 | 0.666095 |
| Megf10   | -0.5211  | 0.429589 | 0.666095 |
| Trmt10a  | -0.20561 | 0.429589 | 0.666095 |
| Acsl1    | -0.10994 | 0.429477 | 0.666095 |
| Zfp623   | -0.23139 | 0.429439 | 0.666095 |
| Zfp968   | -0.48369 | 0.429284 | 0.666095 |
| Larp7    | -0.10215 | 0.429158 | 0.666095 |
| Zfp710   | -0.26424 | 0.429004 | 0.665955 |
| Galm     | -0.33665 | 0.428815 | 0.66579  |
| Zfhx3    | -0.08338 | 0.428673 | 0.665709 |
| Dusp8    | -0.10709 | 0.428449 | 0.66543  |
| Gm16029  | -1.28056 | 0.428005 | 0.664947 |
| Gm43290  | -0.56602 | 0.427968 | 0.664947 |

|            |          |          |          |
|------------|----------|----------|----------|
| Ppp2r3c    | -0.17195 | 0.427839 | 0.664947 |
| Ciapi1     | -0.12239 | 0.427171 | 0.663995 |
| Mul1       | -0.14324 | 0.427135 | 0.663995 |
| Exoc1      | -0.13144 | 0.426994 | 0.663858 |
| Sv2a       | -0.22993 | 0.426902 | 0.663783 |
| Foxo4      | -0.16973 | 0.426522 | 0.663261 |
| Agap3      | -0.1176  | 0.426424 | 0.663178 |
| Eif3a      | -0.04752 | 0.425995 | 0.662657 |
| Thsd1      | -0.07566 | 0.425679 | 0.662432 |
| Adgrb1     | -0.74364 | 0.425609 | 0.662392 |
| Gm42651    | -0.36054 | 0.425085 | 0.661853 |
| Tsen54     | -0.22202 | 0.424869 | 0.661585 |
| Gm42983    | -1.64639 | 0.42472  | 0.66158  |
| Tdrd3      | -0.1421  | 0.424733 | 0.66158  |
| Gm16124    | -0.25624 | 0.42431  | 0.661128 |
| Lrp2bp     | -0.69334 | 0.424015 | 0.66087  |
| Nxn12      | -0.1224  | 0.423909 | 0.660846 |
| Zfp874a    | -0.25106 | 0.423897 | 0.660846 |
| Mccc2      | -0.22905 | 0.423563 | 0.660483 |
| Nat10      | -0.21905 | 0.423108 | 0.660006 |
| Gm43668    | -0.35727 | 0.422975 | 0.659871 |
| Gmfb       | -0.09273 | 0.422807 | 0.659746 |
| Pik3cd     | -0.21555 | 0.422587 | 0.659472 |
| Tbc1d32    | -0.17583 | 0.422528 | 0.659456 |
| N6amt1     | -0.16074 | 0.422532 | 0.659456 |
| Dbr1       | -0.1706  | 0.422194 | 0.659271 |
| Adgra3     | -0.12886 | 0.422166 | 0.659271 |
| Gpatch2    | -0.12279 | 0.422041 | 0.65917  |
| Syap1      | -0.09461 | 0.421786 | 0.65884  |
| Gnrh1      | -0.57796 | 0.421355 | 0.658396 |
| Wdr17      | -0.15177 | 0.42137  | 0.658396 |
| Gm16196    | -0.37488 | 0.421301 | 0.658396 |
| Snx24      | -0.2174  | 0.421116 | 0.658309 |
| Galnt11    | -0.1208  | 0.421038 | 0.658289 |
| Lyn        | -0.10162 | 0.420981 | 0.658269 |
| Xylt1      | -0.29151 | 0.420882 | 0.658183 |
| Rbm19      | -0.2238  | 0.420623 | 0.657915 |
| Selenok-ps | -0.43821 | 0.420456 | 0.657846 |
| Ppt2       | -0.11533 | 0.420494 | 0.657846 |
| Rad21      | -0.06557 | 0.420391 | 0.657828 |
| Cby1       | -0.13469 | 0.419976 | 0.657522 |
| Smug1      | -0.15582 | 0.41988  | 0.65744  |
| Mir124a-1  | -0.07014 | 0.419819 | 0.65744  |
| Ncoa5      | -0.15158 | 0.419792 | 0.65744  |
| Ap5b1      | -0.42184 | 0.419569 | 0.657296 |
| 1700008JC  | -0.24603 | 0.419005 | 0.65665  |
| Gstk1      | -0.17505 | 0.418571 | 0.656283 |

|           |          |          |          |
|-----------|----------|----------|----------|
| Entpd5    | -0.19647 | 0.4184   | 0.656084 |
| Hexdc     | -0.16424 | 0.418277 | 0.656028 |
| Zfp398    | -0.11888 | 0.418131 | 0.655868 |
| Ergic2    | -0.08183 | 0.417415 | 0.655019 |
| Irf5      | -0.5242  | 0.417307 | 0.655009 |
| Drg1      | -0.09477 | 0.417294 | 0.655009 |
| Zwint     | -0.10497 | 0.4167   | 0.654514 |
| Hmg20a    | -0.09218 | 0.416566 | 0.654408 |
| Smarca5-p | -0.57708 | 0.416492 | 0.654408 |
| Mak16     | -0.12794 | 0.416402 | 0.654408 |
| Gm9484    | -0.68266 | 0.415833 | 0.653838 |
| Pcolce2   | -0.49984 | 0.415144 | 0.652919 |
| Kcnj9     | -0.78669 | 0.414793 | 0.652516 |
| Gm20463   | -0.82863 | 0.414817 | 0.652516 |
| Arl6ip6   | -0.12798 | 0.414804 | 0.652516 |
| Atat1     | -0.18578 | 0.414799 | 0.652516 |
| Nt5c3b    | -0.15274 | 0.414448 | 0.652277 |
| Gm16973   | -0.30417 | 0.414352 | 0.652264 |
| Gnao1     | -0.17039 | 0.414287 | 0.65223  |
| Ccdc39    | -0.52525 | 0.41427  | 0.65223  |
| Tex264    | -0.10095 | 0.414266 | 0.65223  |
| Armc9     | -0.2584  | 0.413897 | 0.651959 |
| Cln8      | -0.18028 | 0.413775 | 0.651903 |
| Dipk1a    | -0.09073 | 0.413412 | 0.651606 |
| Sh3tc2    | -0.22963 | 0.413257 | 0.651497 |
| Wdr3      | -0.17289 | 0.412975 | 0.65126  |
| Rncr4     | -0.24733 | 0.412811 | 0.651186 |
| Ebf1      | -0.0451  | 0.412724 | 0.651138 |
| Hbegf     | -0.09807 | 0.412574 | 0.651039 |
| Lypd6     | -0.26987 | 0.412427 | 0.650875 |
| Gm45148   | -1.07182 | 0.412296 | 0.650737 |
| mt-Tq     | -0.42716 | 0.412054 | 0.650544 |
| Itga10    | -0.35042 | 0.41171  | 0.650155 |
| Cd46      | -0.25574 | 0.411543 | 0.650032 |
| Tspxl1    | -0.09335 | 0.411275 | 0.649742 |
| Gm43437   | -0.51318 | 0.410968 | 0.649326 |
| Pfkl      | -0.0728  | 0.410642 | 0.649016 |
| Trappc2l  | -0.08219 | 0.410456 | 0.648977 |
| Icam2     | -0.06065 | 0.410388 | 0.648977 |
| Lrit2     | -0.15764 | 0.410267 | 0.648977 |
| Gm3695    | -0.62953 | 0.410075 | 0.648845 |
| Gm16104   | -0.34017 | 0.4101   | 0.648845 |
| Cks1b     | -0.29341 | 0.410082 | 0.648845 |
| Trp53     | -0.1084  | 0.410085 | 0.648845 |
| Nup88     | -0.11572 | 0.410048 | 0.648845 |
| E030030I0 | -0.24478 | 0.409987 | 0.648845 |
| Ivd       | -0.16468 | 0.409831 | 0.648845 |



|           |          |          |          |
|-----------|----------|----------|----------|
| Ago4      | -0.19193 | 0.409825 | 0.648845 |
| Gm10297   | -0.66193 | 0.409697 | 0.648845 |
| Esco1     | -0.10669 | 0.409724 | 0.648845 |
| Mycl      | -0.25447 | 0.409647 | 0.648845 |
| Sdr39u1   | -0.17607 | 0.409169 | 0.64833  |
| Tango6    | -0.24006 | 0.409096 | 0.648283 |
| Smarcc2   | -0.07524 | 0.408531 | 0.647799 |
| Dipk1c    | -0.47395 | 0.408414 | 0.647799 |
| Cep76     | -0.29908 | 0.408275 | 0.647737 |
| Plch2     | -0.16574 | 0.408111 | 0.647697 |
| Ica1      | -0.12435 | 0.407954 | 0.64757  |
| Stat5b    | -0.11975 | 0.407923 | 0.64757  |
| Zfp68     | -0.10102 | 0.407619 | 0.647314 |
| Gm49886   | -0.99632 | 0.407242 | 0.646909 |
| Szrd1     | -0.10015 | 0.407289 | 0.646909 |
| Gm43765   | -1.10291 | 0.407176 | 0.646909 |
| Gm37570   | -0.46071 | 0.406949 | 0.646867 |
| Ppm1l     | -0.14091 | 0.40675  | 0.646676 |
| C430014B  | -0.62894 | 0.406359 | 0.646272 |
| Atp6v1a   | -0.07207 | 0.406338 | 0.646272 |
| Pcdhb19   | -0.35731 | 0.406223 | 0.646263 |
| Gm10524   | -0.25585 | 0.406177 | 0.646263 |
| 9930024V  | -0.28281 | 0.406182 | 0.646263 |
| Gm42670   | -0.38408 | 0.405629 | 0.645866 |
| Ltn1      | -0.11048 | 0.405479 | 0.645695 |
| Col19a1   | -0.57739 | 0.40516  | 0.645352 |
| Slc15a2   | -0.22967 | 0.405177 | 0.645352 |
| Inhba     | -0.47052 | 0.405007 | 0.645352 |
| 2210408I2 | -0.30356 | 0.405006 | 0.645352 |
| Fsbp      | -0.47148 | 0.404856 | 0.645352 |
| Zfp119a   | -0.23949 | 0.404875 | 0.645352 |
| Hagh      | -0.09769 | 0.404863 | 0.645352 |
| Usp9x     | -0.06887 | 0.404771 | 0.645352 |
| Haspin    | -0.77793 | 0.404662 | 0.645352 |
| Rgs7      | -0.72545 | 0.404629 | 0.645352 |
| Mtrex     | -0.10807 | 0.404622 | 0.645352 |
| Gm38142   | -0.55801 | 0.404185 | 0.645007 |
| Sumf1     | -0.17607 | 0.403874 | 0.644716 |
| Gm10125   | -0.3063  | 0.403819 | 0.644716 |
| Ebna1bp2  | -0.09461 | 0.403702 | 0.644716 |
| Naa15     | -0.08941 | 0.403468 | 0.64455  |
| Ppil1     | -0.16538 | 0.403168 | 0.644208 |
| Mb21d2    | -0.2789  | 0.403159 | 0.644208 |
| Tom1      | -0.21794 | 0.402734 | 0.643721 |
| Copz1     | -0.0991  | 0.402593 | 0.643702 |
| Fnta      | -0.08698 | 0.402341 | 0.643367 |
| Oma1      | -0.15771 | 0.402296 | 0.643367 |

|           |          |          |          |
|-----------|----------|----------|----------|
| Gm37397   | -0.50528 | 0.402258 | 0.643367 |
| Diras1    | -1.06393 | 0.401935 | 0.642993 |
| Ercc8     | -0.27172 | 0.401731 | 0.642888 |
| 4833422C  | -0.23496 | 0.40169  | 0.642888 |
| Acox1     | -0.88739 | 0.401571 | 0.642888 |
| Gm26559   | -0.71859 | 0.401254 | 0.64259  |
| Gm50069   | -0.37156 | 0.401107 | 0.642492 |
| Tpk1      | -0.27993 | 0.401105 | 0.642492 |
| Hivep2    | -0.09716 | 0.401044 | 0.642492 |
| Zfp131    | -0.10841 | 0.400891 | 0.642353 |
| Rfng      | -0.18168 | 0.400878 | 0.642353 |
| Sdad1     | -0.17242 | 0.400874 | 0.642353 |
| Gm48887   | -0.32661 | 0.400838 | 0.642353 |
| Rbm12b1   | -0.27532 | 0.400817 | 0.642353 |
| Gm11339   | -0.98745 | 0.400399 | 0.64203  |
| Tmem214   | -0.13027 | 0.400432 | 0.64203  |
| Hes1      | -0.06172 | 0.400046 | 0.641823 |
| Gemin2    | -0.1816  | 0.399998 | 0.641815 |
| 1700119H  | -0.54395 | 0.399751 | 0.641624 |
| Scamp1    | -0.08432 | 0.399236 | 0.641163 |
| Hspe1-rs1 | -0.53127 | 0.399156 | 0.64115  |
| Tceal3    | -0.24281 | 0.399139 | 0.64115  |
| Abraxas1  | -0.24509 | 0.398934 | 0.64105  |
| Prpf38b   | -0.07232 | 0.398703 | 0.640766 |
| Psm5      | -0.12933 | 0.39867  | 0.640766 |
| Ccdc142os | -0.46422 | 0.398504 | 0.640653 |
| Ctu2      | -0.18441 | 0.398271 | 0.640347 |
| Tspyl3    | -0.42712 | 0.397737 | 0.639832 |
| Ccdc59    | -0.07234 | 0.397537 | 0.639717 |
| Cactin    | -0.14568 | 0.397257 | 0.639548 |
| Mrpl47    | -0.19036 | 0.397169 | 0.639548 |
| Cnot1     | -0.08876 | 0.396908 | 0.639346 |
| Arap2     | -0.07066 | 0.396721 | 0.639229 |
| Snupn     | -0.17689 | 0.396232 | 0.638508 |
| Ndufb9    | -0.04928 | 0.39601  | 0.638242 |
| Slc1a1    | -0.08788 | 0.395975 | 0.638242 |
| Clba1     | -0.2909  | 0.395565 | 0.638053 |
| Nova1     | -0.58633 | 0.395476 | 0.637978 |
| Hopx      | -0.15656 | 0.395467 | 0.637978 |
| Tfb2m     | -0.14602 | 0.395421 | 0.637978 |
| Mrpl23-ps | -0.31276 | 0.395404 | 0.637978 |
| Srrm4     | -0.3981  | 0.395314 | 0.637978 |
| Cdr1os    | -0.25112 | 0.394923 | 0.637566 |
| Ubn1      | -0.07279 | 0.394712 | 0.637295 |
| Pin1      | -0.0917  | 0.394543 | 0.637168 |
| A330076H  | -0.83252 | 0.394393 | 0.637053 |
| Tomm22    | -0.0798  | 0.394317 | 0.637024 |

|           |          |          |          |
|-----------|----------|----------|----------|
| Psmc3ip   | -0.33183 | 0.394185 | 0.637013 |
| 6430562O  | -0.45609 | 0.394062 | 0.636932 |
| Myo19     | -0.34964 | 0.393446 | 0.636348 |
| Mrpl3     | -0.13819 | 0.393369 | 0.636292 |
| Dnajc7    | -0.08002 | 0.393161 | 0.636093 |
| Msi2      | -0.05539 | 0.393024 | 0.636009 |
| Mrpl34    | -0.09587 | 0.3927   | 0.635554 |
| Col5a3    | -0.22054 | 0.392643 | 0.635529 |
| Fam204a   | -0.09495 | 0.392596 | 0.635522 |
| Nhlrc2    | -0.11309 | 0.392448 | 0.635421 |
| Grm6      | -0.57401 | 0.392097 | 0.635127 |
| Gm37678   | -0.74443 | 0.391828 | 0.635083 |
| Eif3c     | -0.056   | 0.391945 | 0.635083 |
| Elp2      | -0.16097 | 0.391917 | 0.635083 |
| Erap1     | -0.11486 | 0.391824 | 0.635083 |
| Kctd7     | -0.28082 | 0.391729 | 0.635083 |
| Cracd     | -0.50029 | 0.391506 | 0.634874 |
| Ldlrad4   | -0.17668 | 0.391471 | 0.634874 |
| Caap1     | -0.1423  | 0.39122  | 0.634712 |
| Gm2810    | -0.46335 | 0.391012 | 0.634693 |
| Commd10   | -0.1438  | 0.391017 | 0.634693 |
| Abi2      | -0.10198 | 0.390943 | 0.634693 |
| Ilk       | -0.08606 | 0.390697 | 0.634575 |
| Rrp7a     | -0.14981 | 0.390351 | 0.634151 |
| Bcl7c     | -0.10026 | 0.390119 | 0.633911 |
| Tomm6os   | -0.80428 | 0.389953 | 0.633711 |
| Tbc1d22b  | -0.20214 | 0.389874 | 0.633661 |
| Dio2      | -0.35765 | 0.389722 | 0.633541 |
| Snrnp70   | -0.05931 | 0.389585 | 0.633433 |
| Syn1      | -0.71735 | 0.389506 | 0.633396 |
| Mageh1    | -0.10571 | 0.38944  | 0.633359 |
| Ess2      | -0.15313 | 0.389376 | 0.633322 |
| Gad1      | -0.69047 | 0.38927  | 0.633289 |
| Cep128    | -0.34887 | 0.388845 | 0.633009 |
| Gm39469   | -0.42477 | 0.388741 | 0.632978 |
| Zmynd11   | -0.06217 | 0.388713 | 0.632978 |
| 2010320V  | -0.1596  | 0.388604 | 0.632892 |
| Cnih2     | -0.70986 | 0.387579 | 0.631546 |
| Gm48079   | -0.51663 | 0.387333 | 0.631234 |
| Tbc1d19   | -0.18589 | 0.3873   | 0.631234 |
| Ntn3      | -0.31581 | 0.386782 | 0.630571 |
| 9630050E: | -0.17727 | 0.386534 | 0.630274 |
| Morn1     | -0.52221 | 0.38649  | 0.630272 |
| Ccdc82    | -0.08379 | 0.386426 | 0.630236 |
| Rp111     | -0.13057 | 0.386164 | 0.629947 |
| Lrriq3    | -0.79498 | 0.386037 | 0.629947 |
| Spag7     | -0.08598 | 0.386073 | 0.629947 |

|           |          |          |          |
|-----------|----------|----------|----------|
| Marchf3   | -0.35678 | 0.386054 | 0.629947 |
| Prkar1b   | -0.22671 | 0.385945 | 0.629947 |
| Ccrl2     | -0.13714 | 0.385899 | 0.629947 |
| Brd8dc    | -0.43204 | 0.385863 | 0.629947 |
| Prmt2     | -0.16322 | 0.385638 | 0.629823 |
| Sub1      | -0.05469 | 0.385529 | 0.629803 |
| Gm44937   | -0.17269 | 0.385457 | 0.629754 |
| Angpt1    | -0.2951  | 0.384949 | 0.62913  |
| Gm49153   | -0.64512 | 0.384726 | 0.628995 |
| Helz      | -0.08417 | 0.384576 | 0.628932 |
| Mir100hg  | -0.17303 | 0.384445 | 0.628932 |
| Eif2s3y   | -0.09459 | 0.384297 | 0.628888 |
| Napg      | -0.09619 | 0.384082 | 0.628605 |
| Gm43482   | -0.385   | 0.383934 | 0.628499 |
| A230072C  | -0.57716 | 0.383572 | 0.628089 |
| Gabrr2    | -0.57432 | 0.383444 | 0.628    |
| Nono      | -0.07088 | 0.383351 | 0.627958 |
| Klhl21    | -0.17656 | 0.383276 | 0.627903 |
| Zfp239    | -0.64769 | 0.383126 | 0.627794 |
| Grk6      | -0.15698 | 0.382972 | 0.627624 |
| Tox3      | -0.17024 | 0.382905 | 0.627624 |
| Cckbr     | -0.88842 | 0.382198 | 0.626892 |
| Bgn       | -0.09867 | 0.382059 | 0.626801 |
| 1700016J1 | -0.90748 | 0.381386 | 0.625835 |
| Fam20a    | -0.21211 | 0.381379 | 0.625835 |
| Zfp974    | -0.3367  | 0.381291 | 0.625835 |
| Gm13830   | -0.44992 | 0.381093 | 0.625726 |
| Gm45483   | -0.57039 | 0.380932 | 0.625637 |
| Zxdc      | -0.17043 | 0.380887 | 0.625633 |
| Rdh14     | -0.15618 | 0.380878 | 0.625633 |
| Xpo1      | -0.10425 | 0.380437 | 0.625168 |
| Lrsam1    | -0.27134 | 0.380325 | 0.625052 |
| Srm       | -0.19231 | 0.380245 | 0.625012 |
| Rps6ka5   | -0.14405 | 0.38017  | 0.625012 |
| Des       | -0.10852 | 0.380046 | 0.625012 |
| Atg12     | -0.08867 | 0.380005 | 0.625012 |
| Sestd1    | -0.15391 | 0.379937 | 0.625012 |
| Timm50    | -0.13798 | 0.379938 | 0.625012 |
| Mpv17l    | -0.31815 | 0.379854 | 0.625012 |
| Brcc3     | -0.13598 | 0.379608 | 0.624834 |
| Zfp458    | -0.30147 | 0.379368 | 0.624576 |
| Map1a     | -0.21976 | 0.379367 | 0.624576 |
| Stard7    | -0.09664 | 0.37905  | 0.62426  |
| Gstm5     | -0.09514 | 0.37902  | 0.62426  |
| Hspa12a   | -0.18364 | 0.378844 | 0.624056 |
| Gse1      | -0.09772 | 0.378475 | 0.623586 |
| Tshz1     | -0.08649 | 0.378432 | 0.623583 |

|          |          |          |          |
|----------|----------|----------|----------|
| Dhx38    | -0.1363  | 0.378371 | 0.623553 |
| Fendrr   | -0.24225 | 0.377813 | 0.622831 |
| Coa6     | -0.13421 | 0.377731 | 0.622831 |
| Gm38380  | -0.30508 | 0.377488 | 0.622714 |
| Exd2     | -0.18966 | 0.377458 | 0.622714 |
| Mpc2     | -0.07444 | 0.377451 | 0.622714 |
| Otud6b   | -0.13268 | 0.376421 | 0.621502 |
| Sptan1   | -0.05261 | 0.376176 | 0.621167 |
| Eif1ax   | -0.08703 | 0.375744 | 0.620588 |
| Zfp267   | -0.16893 | 0.375681 | 0.620554 |
| Fcsk     | -0.26178 | 0.375369 | 0.620174 |
| Krba1    | -0.22972 | 0.375322 | 0.620166 |
| Arntl2   | -0.29837 | 0.375242 | 0.620102 |
| Atp6v0b  | -0.06078 | 0.374839 | 0.619709 |
| Hyal1    | -0.1757  | 0.374808 | 0.619709 |
| Arl1     | -0.07372 | 0.374696 | 0.619704 |
| Riok1    | -0.11167 | 0.374658 | 0.619704 |
| Zcchc8   | -0.11248 | 0.3741   | 0.619034 |
| Scyl3    | -0.19926 | 0.373985 | 0.619005 |
| Prpf31   | -0.13657 | 0.374    | 0.619005 |
| Fam122b  | -0.30915 | 0.373658 | 0.618576 |
| Klhl4    | -0.13257 | 0.373419 | 0.618319 |
| Gusb     | -0.15098 | 0.373305 | 0.618197 |
| Rtn1     | -0.22025 | 0.372906 | 0.617809 |
| Cabyr    | -1.05762 | 0.372667 | 0.617551 |
| Selenoo  | -0.17024 | 0.372276 | 0.61724  |
| Hars2    | -0.18296 | 0.372243 | 0.61724  |
| Prep     | -0.1927  | 0.37219  | 0.617238 |
| Gm45206  | -1.47087 | 0.372021 | 0.617095 |
| Dnajc4   | -0.14467 | 0.372159 | 0.617238 |
| Tmem17   | -0.42218 | 0.370898 | 0.615969 |
| Rnf34    | -0.15878 | 0.370931 | 0.615969 |
| Qrich1   | -0.11477 | 0.370318 | 0.615088 |
| Fbxl17   | -0.14103 | 0.370297 | 0.615088 |
| Ndfip2   | -0.08366 | 0.370143 | 0.614934 |
| Arfip1   | -0.14742 | 0.37002  | 0.614893 |
| Hacl1    | -0.23074 | 0.369748 | 0.614629 |
| 8030456N | -0.60993 | 0.369558 | 0.614504 |
| Setdb1   | -0.17069 | 0.369597 | 0.614504 |
| Zc2hc1c  | -0.664   | 0.36898  | 0.613751 |
| Mmaa     | -0.22586 | 0.368881 | 0.613655 |
| Pitpnb   | -0.09107 | 0.368562 | 0.613328 |
| Klc2     | -0.21064 | 0.368488 | 0.613328 |
| Dcaf15   | -0.25149 | 0.368195 | 0.613057 |
| Cul3     | -0.07245 | 0.368192 | 0.613057 |
| Nbr1     | -0.09403 | 0.368155 | 0.613057 |
| Scp2     | -0.07553 | 0.367585 | 0.612726 |

|           |          |          |          |
|-----------|----------|----------|----------|
| Septin4   | -0.06852 | 0.367587 | 0.612726 |
| Nat14     | -0.21324 | 0.367325 | 0.612495 |
| Ccdc96    | -0.67147 | 0.366903 | 0.611956 |
| Hba-a2    | -0.35427 | 0.36692  | 0.611956 |
| Cmc4      | -0.20566 | 0.366737 | 0.611786 |
| Ranbp2    | -0.07862 | 0.36664  | 0.611693 |
| Uimc1     | -0.1125  | 0.366384 | 0.611538 |
| Rbfox1    | -0.88921 | 0.366227 | 0.61148  |
| Tada1     | -0.18134 | 0.366187 | 0.61148  |
| Arfgap2   | -0.11944 | 0.36605  | 0.61139  |
| Cep131    | -0.31536 | 0.365965 | 0.611375 |
| Ndufaf5   | -0.23077 | 0.365625 | 0.610885 |
| Gm47088   | -0.85474 | 0.365267 | 0.610423 |
| Septin2-1 | -0.21373 | 0.365023 | 0.610083 |
| A930002C1 | -1.20489 | 0.364852 | 0.609865 |
| Magohb    | -0.17809 | 0.364826 | 0.609865 |
| Ndufb1    | -0.05982 | 0.364622 | 0.609822 |
| Rarg      | -0.11956 | 0.364616 | 0.609822 |
| Zfpm1     | -0.10657 | 0.364252 | 0.609407 |
| Zfp322a   | -0.12564 | 0.364195 | 0.609407 |
| Set       | -0.0608  | 0.363837 | 0.608985 |
| Senp7     | -0.11281 | 0.363601 | 0.608662 |
| Schip1    | -0.28519 | 0.363488 | 0.608605 |
| Shmt2     | -0.2033  | 0.363313 | 0.608447 |
| Aurka     | -0.79717 | 0.3632   | 0.608327 |
| Smg9      | -0.18078 | 0.363162 | 0.608327 |
| Atp5j     | -0.04258 | 0.363109 | 0.608311 |
| Snrpd1    | -0.07679 | 0.362934 | 0.608221 |
| Tmem33    | -0.10245 | 0.362925 | 0.608221 |
| Gm47694   | -0.72435 | 0.362806 | 0.608177 |
| Dst       | -0.06376 | 0.362826 | 0.608177 |
| Dhx30     | -0.11335 | 0.362604 | 0.608077 |
| Bpnt1     | -0.16677 | 0.362511 | 0.607988 |
| Traf5     | -0.14121 | 0.361895 | 0.607295 |
| Zfp384    | -0.20068 | 0.361881 | 0.607295 |
| G2e3      | -0.169   | 0.36164  | 0.607143 |
| Mapk8ip3  | -0.10701 | 0.361501 | 0.607111 |
| Mrpl48    | -0.09984 | 0.361326 | 0.606954 |
| Hspb7     | -0.29871 | 0.361212 | 0.606954 |
| Auts2     | -0.08226 | 0.361183 | 0.606954 |
| Tapt1     | -0.13122 | 0.361007 | 0.606828 |
| Bag6      | -0.10394 | 0.360917 | 0.606811 |
| Gm49125   | -0.48945 | 0.360776 | 0.606769 |
| Meak7     | -0.33742 | 0.360586 | 0.606664 |
| Gm46218   | -0.67619 | 0.360483 | 0.606558 |
| Dmtf1     | -0.11014 | 0.360031 | 0.606002 |
| Vax2      | -0.25934 | 0.359809 | 0.605764 |

|           |          |          |          |
|-----------|----------|----------|----------|
| Vps41     | -0.13106 | 0.359809 | 0.605764 |
| Zfp935    | -0.28556 | 0.3596   | 0.605764 |
| Ercc6l2   | -0.16009 | 0.35948  | 0.605688 |
| Zcrb1     | -0.07273 | 0.359339 | 0.60557  |
| Cwc25     | -0.12993 | 0.358743 | 0.604854 |
| Mblac2    | -0.25645 | 0.358658 | 0.604779 |
| Rbm11     | -0.66254 | 0.358299 | 0.604291 |
| Jpx       | -0.31722 | 0.357963 | 0.604083 |
| Gm43178   | -0.5909  | 0.357709 | 0.603722 |
| Alg3      | -0.25003 | 0.357361 | 0.603339 |
| Ip6k2     | -0.12854 | 0.357045 | 0.602873 |
| Tmem198   | -0.69914 | 0.356981 | 0.602833 |
| Sdhd      | -0.08571 | 0.356828 | 0.602642 |
| Arid4b    | -0.0749  | 0.356773 | 0.602617 |
| Olfr1124  | -0.67209 | 0.356526 | 0.602268 |
| Tmco3     | -0.14873 | 0.356459 | 0.602223 |
| Ppp6r1    | -0.1368  | 0.356397 | 0.602187 |
| C030017G  | -0.95808 | 0.35631  | 0.602107 |
| Sgms2     | -0.12596 | 0.35603  | 0.601906 |
| Cacnb2    | -0.17144 | 0.355931 | 0.601806 |
| Ppil4     | -0.10179 | 0.355837 | 0.60178  |
| Egfr      | -0.33411 | 0.355799 | 0.60178  |
| Ptpdc1    | -0.2524  | 0.355329 | 0.601165 |
| Taf6l     | -0.40513 | 0.355264 | 0.601154 |
| Ankrd26   | -0.17428 | 0.355106 | 0.601022 |
| Cpeb3     | -0.19484 | 0.354682 | 0.600373 |
| Tspan18   | -0.19264 | 0.354668 | 0.600373 |
| Yod1      | -0.14718 | 0.354653 | 0.600373 |
| Gm16141   | -0.91344 | 0.354295 | 0.599989 |
| Mss51     | -0.41165 | 0.354368 | 0.600045 |
| Ccdc180   | -0.49863 | 0.354281 | 0.599989 |
| Qrs1      | -0.2794  | 0.354275 | 0.599989 |
| Prmt5     | -0.17345 | 0.354082 | 0.59996  |
| Nelfa     | -0.12363 | 0.353599 | 0.599625 |
| 1810014B1 | -0.29853 | 0.353518 | 0.599625 |
| Prkdc     | -0.22868 | 0.353404 | 0.599565 |
| Tm7sf2    | -0.52868 | 0.353022 | 0.599054 |
| Kcp       | -0.28115 | 0.352692 | 0.598697 |
| Tmem80    | -0.15539 | 0.352375 | 0.598372 |
| Pcm1      | -0.07246 | 0.352181 | 0.598236 |
| Gspt2     | -0.38454 | 0.351146 | 0.596955 |
| Abhd16a   | -0.11096 | 0.351157 | 0.596955 |
| Ppih      | -0.23006 | 0.351057 | 0.596955 |
| Tmem209   | -0.20735 | 0.350875 | 0.596763 |
| Psma8     | -0.29163 | 0.350604 | 0.596437 |
| Wasl      | -0.0891  | 0.349971 | 0.595698 |
| Apoe      | -0.05536 | 0.349856 | 0.595576 |

|          |          |          |          |
|----------|----------|----------|----------|
| Fbrs     | -0.14111 | 0.349859 | 0.595576 |
| Ttc28    | -0.074   | 0.34985  | 0.595576 |
| Svip     | -0.1885  | 0.349815 | 0.595576 |
| Gm47956  | -0.84598 | 0.349656 | 0.595576 |
| Nhsl1    | -0.10379 | 0.34892  | 0.594722 |
| Usp51    | -1.04259 | 0.348744 | 0.594682 |
| Krt18    | -0.23249 | 0.348631 | 0.594634 |
| Mgme1    | -0.21518 | 0.348625 | 0.594634 |
| Ccdc125  | -0.22969 | 0.347741 | 0.593523 |
| Pcdhga8  | -0.51948 | 0.34765  | 0.593502 |
| Pcyt2    | -0.19704 | 0.347147 | 0.592913 |
| Rrs1     | -0.20391 | 0.346892 | 0.592587 |
| Polb     | -0.11759 | 0.346528 | 0.59223  |
| Zfp94    | -0.39892 | 0.346432 | 0.592165 |
| Nup93    | -0.20767 | 0.34626  | 0.592007 |
| Gm49204  | -0.33519 | 0.346218 | 0.592002 |
| Pde8a    | -0.08506 | 0.346195 | 0.592002 |
| Slc9a6   | -0.18737 | 0.345482 | 0.591032 |
| Ociad1   | -0.0893  | 0.345492 | 0.591032 |
| Bmpr1a   | -0.13465 | 0.345267 | 0.590916 |
| Atg2b    | -0.22422 | 0.345235 | 0.590916 |
| Gm49785  | -0.70315 | 0.345134 | 0.590824 |
| Mus81    | -0.22901 | 0.3451   | 0.590824 |
| Arglu1   | -0.05688 | 0.344648 | 0.590262 |
| Usp37    | -0.14966 | 0.34447  | 0.590025 |
| Nrbf2    | -0.25891 | 0.344443 | 0.590025 |
| Zc3h4    | -0.15164 | 0.344327 | 0.589932 |
| Srfbp1   | -0.18932 | 0.34419  | 0.589815 |
| Rad51ap2 | -1.87931 | 0.344019 | 0.58961  |
| Ghitm    | -0.08011 | 0.344031 | 0.58961  |
| Bcl2l15  | -1.25211 | 0.343723 | 0.589216 |
| Ppp6r3   | -0.08645 | 0.343622 | 0.58918  |
| Hspb2    | -0.21547 | 0.343623 | 0.58918  |
| B3gat1   | -0.90559 | 0.34346  | 0.589035 |
| Ikbb     | -0.09239 | 0.343367 | 0.588943 |
| Ndufb10  | -0.06643 | 0.342994 | 0.588574 |
| Nrxn3    | -0.42066 | 0.342883 | 0.588519 |
| Mitf     | -0.38691 | 0.342757 | 0.588437 |
| Prmt6    | -0.25308 | 0.341879 | 0.587092 |
| Col27a1  | -0.29074 | 0.341798 | 0.587092 |
| Usp20    | -0.27698 | 0.341397 | 0.586787 |
| Klhl18   | -0.13781 | 0.341404 | 0.586787 |
| Gm42726  | -0.43084 | 0.340618 | 0.585974 |
| Gria1    | -1.24903 | 0.340377 | 0.585626 |
| Trim23   | -0.21279 | 0.340336 | 0.585626 |
| Rexo1    | -0.11606 | 0.340345 | 0.585626 |
| Wdr55    | -0.355   | 0.340064 | 0.58529  |



|          |          |          |          |
|----------|----------|----------|----------|
| Pde1c    | -0.32846 | 0.340024 | 0.585289 |
| Kpna2    | -0.30788 | 0.340002 | 0.585289 |
| Trim26   | -0.11463 | 0.339726 | 0.58491  |
| Lrp6     | -0.07537 | 0.339637 | 0.584824 |
| 1110035H | -0.28607 | 0.339498 | 0.584672 |
| Mdga1    | -0.80751 | 0.339509 | 0.584672 |
| Bsdc1    | -0.10995 | 0.339402 | 0.584621 |
| Naaa     | -0.29556 | 0.339331 | 0.584603 |
| Pomt1    | -0.33854 | 0.339062 | 0.584238 |
| Notch3   | -0.10294 | 0.338979 | 0.584229 |
| 4933434E | -0.13253 | 0.338898 | 0.584157 |
| Pigu     | -0.21982 | 0.338817 | 0.584116 |
| Sfi1     | -0.30194 | 0.338762 | 0.584116 |
| Gm45745  | -0.96423 | 0.338583 | 0.583949 |
| Kctd15   | -0.49509 | 0.338341 | 0.58362  |
| Naa50    | -0.1023  | 0.338273 | 0.583616 |
| Usp21    | -0.20116 | 0.338177 | 0.583519 |
| Gm43528  | -0.91498 | 0.337935 | 0.583234 |
| Dab2ip   | -0.05899 | 0.337907 | 0.583234 |
| 2500004C | -0.39202 | 0.337877 | 0.583234 |
| Mrpl42   | -0.0953  | 0.337541 | 0.582868 |
| Hgh1     | -0.34987 | 0.337153 | 0.582411 |
| Gm6402   | -0.41923 | 0.33696  | 0.582198 |
| Tmed7    | -0.09779 | 0.336953 | 0.582198 |
| 4632432E | -0.38076 | 0.336881 | 0.582198 |
| Higd1a   | -0.0799  | 0.336898 | 0.582198 |
| Jade3    | -0.32079 | 0.336779 | 0.582179 |
| Zfp91    | -0.08858 | 0.336642 | 0.582077 |
| Gm48796  | -1.45519 | 0.336387 | 0.581703 |
| Fam120b  | -0.16358 | 0.336327 | 0.581667 |
| Zfp105   | -0.26177 | 0.335436 | 0.580393 |
| Ccdc181  | -0.25012 | 0.335222 | 0.580099 |
| Wdfy1    | -0.1081  | 0.335227 | 0.580099 |
| Trim33   | -0.11582 | 0.334879 | 0.579765 |
| Gpatch4  | -0.23673 | 0.334646 | 0.579495 |
| Tti1     | -0.25326 | 0.334547 | 0.579392 |
| Ufl1     | -0.11027 | 0.334507 | 0.579392 |
| Sanbr    | -0.19804 | 0.334424 | 0.579379 |
| Bst2     | -0.07581 | 0.334324 | 0.579324 |
| Efcab7   | -0.35138 | 0.334168 | 0.579203 |
| Mief1    | -0.21116 | 0.333996 | 0.579106 |
| Fam81a   | -0.37149 | 0.333842 | 0.578974 |
| Gm13031  | -1.24778 | 0.333593 | 0.578655 |
| Ccdc3    | -0.29188 | 0.333046 | 0.578196 |
| Gm37694  | -0.76429 | 0.332942 | 0.578149 |
| Bdh2     | -0.55549 | 0.332793 | 0.577959 |
| Gm43322  | -0.59742 | 0.332734 | 0.577955 |

|          |          |          |          |
|----------|----------|----------|----------|
| Dnmt3b   | -0.31434 | 0.332752 | 0.577955 |
| AW54987  | -0.1359  | 0.332744 | 0.577955 |
| Gm43231  | -0.90512 | 0.33253  | 0.57777  |
| Gm29650  | -0.56625 | 0.332456 | 0.577707 |
| Snx29    | -0.32639 | 0.33224  | 0.577399 |
| Gm42611  | -0.31025 | 0.331868 | 0.576886 |
| Mtf2     | -0.1191  | 0.331886 | 0.576886 |
| Fnbp4    | -0.11961 | 0.331853 | 0.576886 |
| Seh1l    | -0.13553 | 0.331623 | 0.576729 |
| Ubxn8    | -0.19158 | 0.331277 | 0.576379 |
| Wfdc3    | -1.17159 | 0.331108 | 0.576346 |
| Gm14419  | -0.69161 | 0.331133 | 0.576346 |
| Gm13524  | -0.92414 | 0.331021 | 0.576284 |
| Dis3l    | -0.25498 | 0.331005 | 0.576284 |
| Sh3yl1   | -0.293   | 0.330912 | 0.576284 |
| Kif1a    | -0.19664 | 0.330921 | 0.576284 |
| Wdr4     | -0.31401 | 0.330812 | 0.576284 |
| ENSMUSG  | -0.76263 | 0.330548 | 0.57593  |
| Kif4     | -1.08165 | 0.330517 | 0.57593  |
| Stk35    | -0.11299 | 0.330371 | 0.575823 |
| Gm12328  | -0.49582 | 0.330137 | 0.575615 |
| Gm13861  | -0.14618 | 0.32995  | 0.57549  |
| Gm20536  | -0.41346 | 0.329301 | 0.57456  |
| Rgs8     | -0.85399 | 0.329186 | 0.574493 |
| Cggbp1   | -0.07858 | 0.32929  | 0.57456  |
| Mrpl37   | -0.18398 | 0.328974 | 0.574256 |
| Ryk      | -0.09537 | 0.328921 | 0.574231 |
| 1110006O | -0.63151 | 0.328664 | 0.574001 |
| 4930412F | -0.66243 | 0.328324 | 0.573724 |
| 2810454H | -0.21902 | 0.32829  | 0.573724 |
| Prdx6    | -0.07906 | 0.328088 | 0.573512 |
| Zfp768   | -0.18898 | 0.327934 | 0.57331  |
| Tex15    | -0.86398 | 0.327127 | 0.572367 |
| Nopchap1 | -0.18635 | 0.32717  | 0.572376 |
| Mppe1    | -0.2314  | 0.326698 | 0.571884 |
| Ipo7     | -0.11832 | 0.326298 | 0.57133  |
| Gdap2    | -0.19418 | 0.326081 | 0.571071 |
| Gm10037  | -0.88419 | 0.325938 | 0.57094  |
| Wdr48    | -0.13244 | 0.325968 | 0.57094  |
| Dpyd     | -0.66922 | 0.325923 | 0.57094  |
| 0610038B | -0.52248 | 0.325939 | 0.57094  |
| Snrnp27  | -0.08791 | 0.325677 | 0.570898 |
| Dlg2     | -0.39676 | 0.325601 | 0.570834 |
| Wdr61    | -0.10455 | 0.325603 | 0.570834 |
| Ube4b    | -0.1291  | 0.325492 | 0.570797 |
| Wdr54    | -0.40391 | 0.325393 | 0.570797 |
| Pcnt     | -0.13634 | 0.325331 | 0.570759 |

|          |          |          |          |
|----------|----------|----------|----------|
| Phxr4    | -0.17127 | 0.325175 | 0.570551 |
| Stox2    | -0.10297 | 0.324886 | 0.570111 |
| Rif1     | -0.09665 | 0.324715 | 0.569878 |
| Med25    | -0.14396 | 0.324682 | 0.569878 |
| Med9     | -0.14099 | 0.324682 | 0.569878 |
| Ddx11    | -0.40889 | 0.324331 | 0.569471 |
| Gm42551  | -0.40694 | 0.324219 | 0.569382 |
| Bach1    | -0.10503 | 0.324242 | 0.569382 |
| Nbeal1   | -0.06644 | 0.323501 | 0.568281 |
| Gm16740  | -0.30067 | 0.322853 | 0.567341 |
| Frk      | -0.2899  | 0.32275  | 0.567228 |
| Git1     | -0.10289 | 0.322201 | 0.566529 |
| Slc9a5   | -0.42231 | 0.321888 | 0.566184 |
| Pgd      | -0.16129 | 0.321891 | 0.566184 |
| Trrap    | -0.1091  | 0.321743 | 0.566139 |
| Sass6    | -0.25725 | 0.321566 | 0.56601  |
| Zmym6    | -0.2504  | 0.321526 | 0.566007 |
| E2f4     | -0.14533 | 0.321507 | 0.566007 |
| Hcfc2    | -0.18558 | 0.321085 | 0.565562 |
| Yipf4    | -0.08681 | 0.321038 | 0.565546 |
| Slc25a37 | -0.20417 | 0.320772 | 0.565212 |
| Cdan1    | -0.20153 | 0.320767 | 0.565212 |
| Gm33195  | -0.43424 | 0.320382 | 0.564871 |
| Mrps12   | -0.11722 | 0.320392 | 0.564871 |
| D430040D | -0.37649 | 0.320276 | 0.564833 |
| Sox5     | -0.2155  | 0.320207 | 0.564833 |
| Ermard   | -0.24746 | 0.320157 | 0.564833 |
| 9130023H | -0.37163 | 0.320132 | 0.564833 |
| Kctd5    | -0.20858 | 0.320143 | 0.564833 |
| Chchd10  | -0.11153 | 0.319808 | 0.564708 |
| Ln timer | -0.6754  | 0.319618 | 0.564507 |
| Kcna6    | -0.97586 | 0.31948  | 0.564446 |
| Apc      | -0.07944 | 0.319546 | 0.564446 |
| Lrrc57   | -0.1706  | 0.319524 | 0.564446 |
| Prpf4    | -0.12965 | 0.319444 | 0.564446 |
| Irf2bp1  | -0.13837 | 0.319388 | 0.564434 |
| Def8     | -0.23734 | 0.319285 | 0.564404 |
| Anapc7   | -0.14653 | 0.319287 | 0.564404 |
| Srgap1   | -0.1386  | 0.319221 | 0.564404 |
| Arfgef1  | -0.09572 | 0.31917  | 0.564404 |
| Itch     | -0.0952  | 0.318941 | 0.564109 |
| Otud3    | -0.37581 | 0.318563 | 0.563606 |
| Slfn5    | -0.06651 | 0.318542 | 0.563606 |
| 1700028E | -0.62161 | 0.318435 | 0.563606 |
| Gm43009  | -0.35066 | 0.318243 | 0.563474 |
| Nedd8    | -0.05914 | 0.318002 | 0.563247 |
| Mest     | -0.30945 | 0.317873 | 0.563247 |

|         |          |          |          |
|---------|----------|----------|----------|
| Ecsit   | -0.18013 | 0.317554 | 0.562986 |
| Gm44708 | -16.8304 | 0.317364 | 0.562944 |
| Gm37717 | -18.0443 | 0.317364 | 0.562944 |
| Dnai3   | -15.595  | 0.317364 | 0.562944 |
| Trim60  | -15.7418 | 0.317364 | 0.562944 |
| Wdr93   | -15.777  | 0.317364 | 0.562944 |
| Gm37904 | -15.7976 | 0.317364 | 0.562944 |
| Gm7420  | -15.1624 | 0.317364 | 0.562944 |
| Gm5398  | -15.4561 | 0.317364 | 0.562944 |
| Gm11368 | -15.6909 | 0.317364 | 0.562944 |
| Gm15520 | -15.991  | 0.317364 | 0.562944 |
| Coa5    | -0.18401 | 0.316965 | 0.562944 |
| Haus6   | -0.26458 | 0.316955 | 0.562944 |
| Gm12258 | -0.34038 | 0.316719 | 0.562772 |
| Klhl33  | -0.85291 | 0.316351 | 0.562319 |
| Vbp1    | -0.09424 | 0.316099 | 0.562071 |
| Gm26691 | -1.12579 | 0.316043 | 0.562038 |
| Col9a1  | -0.3761  | 0.315906 | 0.561865 |
| Zfp966  | -0.70772 | 0.315821 | 0.561861 |
| Gm44673 | -0.68143 | 0.315419 | 0.561328 |
| Adra2c  | -0.86639 | 0.315245 | 0.561152 |
| Tmx1    | -0.11057 | 0.314826 | 0.560555 |
| Abcg3   | -0.43209 | 0.314636 | 0.560334 |
| Zfp2    | -0.32227 | 0.314527 | 0.560323 |
| Pin4    | -0.12221 | 0.314507 | 0.560323 |
| Senp6   | -0.07946 | 0.314267 | 0.560143 |
| Add3    | -0.07592 | 0.313767 | 0.559518 |
| Tmx4    | -0.10111 | 0.313572 | 0.559304 |
| Impact  | -0.15085 | 0.313484 | 0.55924  |
| Ino80   | -0.14897 | 0.313442 | 0.55924  |
| Gm14505 | -0.66321 | 0.313221 | 0.558944 |
| Sh3rf3  | -1.14421 | 0.313077 | 0.558755 |
| Abcc10  | -0.42804 | 0.312788 | 0.558372 |
| Ndst2   | -0.23342 | 0.312828 | 0.558376 |
| Ntng2   | -0.74959 | 0.312515 | 0.558017 |
| Zkscan2 | -0.29993 | 0.312486 | 0.558017 |
| Dynlt1b | -0.5497  | 0.31243  | 0.557999 |
| Dlg3    | -0.3308  | 0.312253 | 0.557881 |
| Tbc1d31 | -0.50067 | 0.312246 | 0.557881 |
| Ppp2r5b | -0.20515 | 0.312119 | 0.557776 |
| Tmem150 | -0.27726 | 0.312017 | 0.557727 |
| Fth-ps2 | -0.82408 | 0.311865 | 0.557586 |
| Gm28959 | -0.96529 | 0.311708 | 0.55744  |
| Arhgef6 | -0.20191 | 0.31166  | 0.55742  |
| Gm15712 | -0.46158 | 0.311314 | 0.557013 |
| Tubd1   | -0.3733  | 0.311085 | 0.556792 |
| Hsd1l   | -0.17104 | 0.311057 | 0.556792 |

|           |          |          |          |
|-----------|----------|----------|----------|
| Mea1      | -0.12161 | 0.310979 | 0.556792 |
| Gm44434   | -0.63062 | 0.31075  | 0.556734 |
| Eps15     | -0.11089 | 0.310765 | 0.556734 |
| Mrps6     | -0.16143 | 0.310613 | 0.556613 |
| 5830416I1 | -0.51834 | 0.31032  | 0.556221 |
| Pigo      | -0.35332 | 0.310258 | 0.556185 |
| 9330159F1 | -0.91186 | 0.309884 | 0.555771 |
| Commd1    | -0.09415 | 0.310002 | 0.555916 |
| Gm12251   | -0.76768 | 0.309842 | 0.555763 |
| Cdk13     | -0.101   | 0.309818 | 0.555763 |
| Atf7      | -0.11414 | 0.309674 | 0.555661 |
| Trmt2b    | -0.20527 | 0.30946  | 0.555499 |
| Pdss2     | -0.26403 | 0.308968 | 0.554859 |
| Morc2a    | -0.17375 | 0.308878 | 0.554765 |
| Raf1      | -0.11713 | 0.308809 | 0.554707 |
| Ireb2     | -0.12508 | 0.30868  | 0.554608 |
| Atp11a    | -0.11129 | 0.308592 | 0.554517 |
| Ifi203-ps | -0.26813 | 0.308574 | 0.554517 |
| Hsbp1     | -0.07317 | 0.308186 | 0.553988 |
| Tmem91    | -0.71809 | 0.308051 | 0.553815 |
| Tex261    | -0.09682 | 0.308053 | 0.553815 |
| Rad54l2   | -0.15002 | 0.30795  | 0.553763 |
| Selenow   | -0.05096 | 0.306836 | 0.552622 |
| Tmed1     | -0.19381 | 0.306359 | 0.551896 |
| Gm7972    | -0.76893 | 0.306243 | 0.551863 |
| Nt5c3     | -0.17362 | 0.306269 | 0.551863 |
| Zmpste24  | -0.11451 | 0.306161 | 0.551805 |
| Cyp4f16   | -0.31431 | 0.305963 | 0.551521 |
| RbmX      | -0.13403 | 0.305634 | 0.551055 |
| Hdac2     | -0.11439 | 0.305319 | 0.550751 |
| Zmat2     | -0.09586 | 0.305148 | 0.550567 |
| Gm15956   | -1.01623 | 0.304997 | 0.55037  |
| Tubb2b    | -0.31562 | 0.304953 | 0.550356 |
| 4930503L1 | -0.15012 | 0.30487  | 0.550273 |
| Krtcap3   | -0.60094 | 0.304609 | 0.550001 |
| 1600017P1 | -0.82809 | 0.304507 | 0.54995  |
| Nolc1     | -0.1261  | 0.304563 | 0.549984 |
| Al480526  | -0.19735 | 0.304057 | 0.549469 |
| H3f3a     | -0.03934 | 0.304015 | 0.549458 |
| Gm38250   | -1.06298 | 0.303838 | 0.549205 |
| Vamp2     | -0.0923  | 0.303813 | 0.549205 |
| Usp7      | -0.0912  | 0.303743 | 0.549166 |
| Rbck1     | -0.11253 | 0.303718 | 0.549166 |
| Uqcrc2    | -0.08103 | 0.303712 | 0.549166 |
| Ndor1-1   | -0.6233  | 0.303625 | 0.549166 |
| Jagn1     | -0.14868 | 0.303102 | 0.548583 |
| 2810030D  | -0.28121 | 0.302727 | 0.548137 |

|           |          |          |          |
|-----------|----------|----------|----------|
| Ift74     | -0.19187 | 0.302735 | 0.548137 |
| Nap1l5    | -0.47434 | 0.302535 | 0.547974 |
| Srgap3    | -0.22068 | 0.302414 | 0.547886 |
| Myct1     | -0.1259  | 0.302137 | 0.547585 |
| Dhx57     | -0.21332 | 0.301543 | 0.54684  |
| Cog2      | -0.19885 | 0.301465 | 0.546764 |
| Gm47218   | -0.60713 | 0.301331 | 0.546652 |
| Zfp644    | -0.07941 | 0.301299 | 0.546652 |
| Sirt7     | -0.149   | 0.300998 | 0.546314 |
| Gm16055   | -0.60826 | 0.300775 | 0.546041 |
| Grap      | -0.11962 | 0.300504 | 0.545814 |
| Enox1     | -0.51933 | 0.300247 | 0.54548  |
| Scnm1     | -0.1808  | 0.300058 | 0.545398 |
| Kdm5a     | -0.1019  | 0.299997 | 0.545356 |
| Pkn2      | -0.07936 | 0.299893 | 0.545299 |
| Gm45179   | -0.97733 | 0.299663 | 0.545193 |
| Padi2     | -0.42943 | 0.299611 | 0.545193 |
| Usp45     | -0.21392 | 0.299539 | 0.545193 |
| Drosha    | -0.16825 | 0.299387 | 0.545041 |
| Pcnx3     | -0.15903 | 0.299127 | 0.544701 |
| Chrnbl    | -0.30951 | 0.29894  | 0.544426 |
| Gm43920   | -0.59207 | 0.298827 | 0.544286 |
| Eno2      | -0.17981 | 0.298801 | 0.544286 |
| Cep295    | -0.17009 | 0.298554 | 0.544112 |
| Enoph1    | -0.2097  | 0.298382 | 0.543936 |
| Pla2g5    | -0.20131 | 0.298193 | 0.543794 |
| Tpr       | -0.06373 | 0.298064 | 0.543624 |
| Rnf214    | -0.15578 | 0.297889 | 0.543437 |
| Chchd1    | -0.09386 | 0.297825 | 0.543387 |
| H3c15     | -0.60831 | 0.297607 | 0.543122 |
| 1110051N  | -0.23069 | 0.297127 | 0.542444 |
| Bloc1s6os | -0.68988 | 0.296528 | 0.541681 |
| C920006O  | -0.52785 | 0.296592 | 0.541732 |
| Ccdc84    | -0.23741 | 0.296505 | 0.541681 |
| Setd2     | -0.09814 | 0.296477 | 0.541681 |
| Gm17491   | -0.26913 | 0.296449 | 0.541681 |
| Bex2      | -0.28906 | 0.296236 | 0.541412 |
| Ust       | -0.52483 | 0.296178 | 0.541371 |
| Dpy30     | -0.10644 | 0.295961 | 0.541107 |
| Polr2k    | -0.09074 | 0.29587  | 0.541107 |
| Lcor      | -0.17048 | 0.295804 | 0.541085 |
| Axl       | -0.14085 | 0.29568  | 0.540955 |
| Peg10     | -0.82589 | 0.294966 | 0.540146 |
| Dnajc12   | -0.22222 | 0.294874 | 0.540044 |
| Nudt6     | -0.35754 | 0.294721 | 0.539955 |
| Traf3ip1  | -0.22905 | 0.294625 | 0.539852 |
| Ptges2    | -0.21702 | 0.294549 | 0.539852 |

|           |          |          |          |
|-----------|----------|----------|----------|
| Prkar1a   | -0.05991 | 0.294565 | 0.539852 |
| Gm10130   | -0.52118 | 0.294339 | 0.53979  |
| Sacs      | -0.21825 | 0.294157 | 0.539588 |
| Gm43799   | -1.0868  | 0.294022 | 0.539474 |
| Prpf18    | -0.15321 | 0.293979 | 0.539474 |
| Sike1     | -0.11    | 0.293729 | 0.539199 |
| C030014I2 | -0.3003  | 0.293329 | 0.538531 |
| Pitpnm3   | -0.19783 | 0.293133 | 0.538303 |
| A430110C  | -0.54085 | 0.292794 | 0.537747 |
| Ndufs8    | -0.10836 | 0.292661 | 0.537568 |
| Zfp810    | -0.22068 | 0.292386 | 0.537435 |
| Adora1    | -0.41579 | 0.292403 | 0.537435 |
| Gbf1      | -0.11513 | 0.292409 | 0.537435 |
| Eif4a3    | -0.11326 | 0.292357 | 0.537435 |
| Mkks      | -0.23686 | 0.292312 | 0.537435 |
| Prmt8     | -1.02157 | 0.291947 | 0.537114 |
| Gm48146   | -0.40118 | 0.292027 | 0.537196 |
| Rmst      | -1.02315 | 0.291937 | 0.537114 |
| Gm37879   | -0.41212 | 0.291751 | 0.536952 |
| Insyn2a   | -0.96675 | 0.291623 | 0.536781 |
| Xpnpep3   | -0.25684 | 0.291576 | 0.536781 |
| Acad8     | -0.1922  | 0.291483 | 0.536781 |
| Isca2     | -0.13557 | 0.291262 | 0.536513 |
| Prdm5     | -0.20775 | 0.290963 | 0.536029 |
| Inpp5e    | -0.27663 | 0.290945 | 0.536029 |
| Snapin    | -0.13904 | 0.290729 | 0.535879 |
| Rgs9      | -0.17685 | 0.290532 | 0.535879 |
| G6pdx     | -0.23363 | 0.290321 | 0.535636 |
| Pgc       | -0.72409 | 0.290159 | 0.53547  |
| Gpc1      | -0.58616 | 0.290117 | 0.535459 |
| 2610021A  | -0.34863 | 0.290118 | 0.535459 |
| Gm44144   | -0.61958 | 0.289823 | 0.535179 |
| Slc25a45  | -0.25181 | 0.289706 | 0.535028 |
| Rnf187    | -0.08426 | 0.289654 | 0.535014 |
| Dnajc28   | -0.33624 | 0.289415 | 0.534822 |
| Gdf11     | -0.23629 | 0.289408 | 0.534822 |
| Auh       | -0.16192 | 0.289314 | 0.534766 |
| Lig4      | -0.27231 | 0.289284 | 0.534766 |
| Vasp      | -0.10398 | 0.289257 | 0.534766 |
| Specc1l   | -0.09689 | 0.288993 | 0.53457  |
| Ppm1e     | -0.35378 | 0.288942 | 0.53457  |
| Map3k11   | -0.1225  | 0.288944 | 0.53457  |
| Cnksr2    | -0.52026 | 0.288858 | 0.53457  |
| A430005L  | -0.15632 | 0.288615 | 0.534332 |
| Sned1     | -0.23196 | 0.288436 | 0.534233 |
| Ln timer  | -0.13263 | 0.288434 | 0.534233 |
| Gm4258    | -0.19237 | 0.288373 | 0.534233 |

|          |          |          |          |
|----------|----------|----------|----------|
| Nup160   | -0.19213 | 0.28835  | 0.534233 |
| Zbtb14   | -0.16692 | 0.288298 | 0.534233 |
| Tfip11   | -0.20041 | 0.288187 | 0.534204 |
| Nudcd3   | -0.09326 | 0.288116 | 0.534204 |
| 2300009A | -0.13311 | 0.288088 | 0.534204 |
| 3830408C | -0.52074 | 0.287846 | 0.534106 |
| Kdm4c    | -0.1366  | 0.287886 | 0.534106 |
| Gtf3c4   | -0.23342 | 0.287852 | 0.534106 |
| Pcgf1    | -0.30676 | 0.287707 | 0.534038 |
| Nae1     | -0.11336 | 0.287335 | 0.533413 |
| Ina      | -0.84629 | 0.287149 | 0.533267 |
| Ublcp1   | -0.14227 | 0.287223 | 0.533322 |
| Zzef1    | -0.15115 | 0.287074 | 0.53326  |
| Ak6      | -0.18024 | 0.286992 | 0.533173 |
| Rrp8     | -0.19955 | 0.2867   | 0.532829 |
| Paics    | -0.11828 | 0.28645  | 0.532497 |
| Mmachc   | -0.52478 | 0.286263 | 0.532216 |
| Sucla2   | -0.12461 | 0.286015 | 0.531886 |
| Arhgef33 | -0.78253 | 0.285853 | 0.531775 |
| Ipmk     | -0.13618 | 0.285897 | 0.531775 |
| Odad1    | -0.43732 | 0.285509 | 0.531341 |
| Tafa3    | -0.48819 | 0.285146 | 0.530732 |
| Snx14    | -0.18501 | 0.28513  | 0.530732 |
| Arhgef15 | -0.10871 | 0.285099 | 0.530732 |
| Gm44616  | -0.69409 | 0.284919 | 0.530508 |
| Fancf    | -0.37726 | 0.284828 | 0.53047  |
| Yars2    | -0.33568 | 0.284655 | 0.530279 |
| Slc24a4  | -1.00738 | 0.284473 | 0.530165 |
| Rchy1    | -0.12481 | 0.284195 | 0.529883 |
| Hmgn5    | -0.13046 | 0.284151 | 0.529869 |
| Itgav    | -0.15013 | 0.283965 | 0.529588 |
| Gm3793   | -1.00808 | 0.283443 | 0.528812 |
| Skp1     | -0.07912 | 0.283065 | 0.528303 |
| Ttll13   | -0.62718 | 0.282738 | 0.527827 |
| Vash1    | -0.4008  | 0.282739 | 0.527827 |
| Scfd1    | -0.14332 | 0.282571 | 0.527644 |
| Acss3    | -0.68677 | 0.2825   | 0.527578 |
| Jph1     | -0.55023 | 0.282337 | 0.527405 |
| Etnk1    | -0.08121 | 0.282215 | 0.527368 |
| Psat1    | -0.26317 | 0.282129 | 0.527368 |
| Trappc8  | -0.13398 | 0.281721 | 0.526977 |
| Mrpl28   | -0.12793 | 0.281456 | 0.526679 |
| Brd3os   | -0.3786  | 0.28135  | 0.526547 |
| Plxdc1   | -0.17515 | 0.281341 | 0.526547 |
| Meg3     | -0.19578 | 0.281255 | 0.5265   |
| Grb10    | -0.11763 | 0.280745 | 0.525676 |
| Tmem106  | -0.11537 | 0.28065  | 0.525631 |



|           |          |          |          |
|-----------|----------|----------|----------|
| Pms1      | -0.31743 | 0.280467 | 0.525459 |
| 4933415A  | -0.57523 | 0.280098 | 0.524925 |
| Smarcad1  | -0.16243 | 0.279553 | 0.524101 |
| 4930518I1 | -0.45847 | 0.279149 | 0.523581 |
| Zfp318    | -0.14349 | 0.279171 | 0.523581 |
| Evi5      | -0.09853 | 0.278808 | 0.523031 |
| Eif4g3    | -0.08939 | 0.278274 | 0.522291 |
| Heatr1    | -0.33824 | 0.278247 | 0.522291 |
| Mfap1a    | -0.12403 | 0.277866 | 0.521796 |
| Rhbdf1    | -0.17255 | 0.277765 | 0.521729 |
| D930030IC | -0.98121 | 0.277644 | 0.521676 |
| Abca7     | -0.17418 | 0.27759  | 0.521661 |
| Zfp397    | -0.1357  | 0.277581 | 0.521661 |
| Mutyh     | -0.42964 | 0.277355 | 0.521482 |
| Traf6     | -0.19433 | 0.276883 | 0.520922 |
| Dhrs3     | -0.10572 | 0.276767 | 0.520768 |
| Polr2b    | -0.1387  | 0.276581 | 0.520483 |
| Pik3cb    | -0.22428 | 0.276488 | 0.520374 |
| Htr1b     | -0.2763  | 0.276442 | 0.520353 |
| Pias3     | -0.15089 | 0.276347 | 0.52024  |
| Dpy19I3   | -0.39891 | 0.276167 | 0.520016 |
| Gm37233   | -0.79736 | 0.276078 | 0.519998 |
| Utp25     | -0.2617  | 0.275994 | 0.519968 |
| Ccpg1os   | -0.36852 | 0.275781 | 0.519635 |
| Pcdhgb7   | -0.76752 | 0.275553 | 0.519398 |
| Cacna2d4  | -0.19106 | 0.275456 | 0.519398 |
| Ano8      | -0.42433 | 0.275186 | 0.51923  |
| Mtmr14    | -0.23447 | 0.275166 | 0.51923  |
| Gstm4     | -0.40404 | 0.275093 | 0.519186 |
| Cerkl     | -0.35006 | 0.27501  | 0.51916  |
| Polr3c    | -0.21468 | 0.274905 | 0.519027 |
| Ncbp3     | -0.14971 | 0.274874 | 0.519027 |
| Psme2b    | -0.20071 | 0.274664 | 0.518701 |
| 2900052L1 | -0.29261 | 0.274529 | 0.518681 |
| Tmco1     | -0.07759 | 0.274529 | 0.518681 |
| Trpm7     | -0.1017  | 0.274317 | 0.51857  |
| Zfp553    | -0.21988 | 0.274242 | 0.518557 |
| Cnst      | -0.2161  | 0.274276 | 0.518557 |
| Sez6l2    | -0.4328  | 0.273753 | 0.517895 |
| Zfp114    | -1.31087 | 0.27307  | 0.516931 |
| Ndufs5    | -0.08755 | 0.273127 | 0.516973 |
| Gpatch2l  | -0.23057 | 0.272654 | 0.516297 |
| Naa35     | -0.12269 | 0.272458 | 0.516167 |
| Ift22     | -0.22903 | 0.272446 | 0.516167 |
| Crygs     | -0.50075 | 0.272339 | 0.516167 |
| Arhgap29  | -0.06577 | 0.272361 | 0.516167 |
| Arell     | -0.23575 | 0.272268 | 0.516167 |

|           |          |          |          |
|-----------|----------|----------|----------|
| Riad1     | -0.90521 | 0.272068 | 0.515947 |
| Cep78     | -0.3228  | 0.271987 | 0.515859 |
| Ptpn23    | -0.20494 | 0.271712 | 0.51543  |
| Zfp157    | -0.23256 | 0.271589 | 0.5153   |
| Mdh2      | -0.08453 | 0.271236 | 0.514695 |
| Dusp19    | -0.35581 | 0.271175 | 0.514645 |
| Ddx27     | -0.15518 | 0.271135 | 0.514635 |
| Gm37082   | -0.21436 | 0.271065 | 0.514567 |
| Prdm1     | -0.22242 | 0.270879 | 0.514279 |
| Tet3      | -0.11141 | 0.270583 | 0.513847 |
| Ppfia1    | -0.12152 | 0.270022 | 0.513106 |
| Ablim2    | -0.51597 | 0.26993  | 0.513098 |
| Tsr2      | -0.21488 | 0.269983 | 0.513098 |
| Ankrd33   | -0.22722 | 0.269903 | 0.513098 |
| Rps6ka2   | -0.48673 | 0.269772 | 0.512958 |
| Gm17690   | -0.71771 | 0.26975  | 0.512958 |
| Clptm1l   | -0.14542 | 0.269738 | 0.512958 |
| Mrm2      | -0.29488 | 0.269736 | 0.512958 |
| BC055308  | -0.51043 | 0.269703 | 0.512958 |
| A430033Kl | -0.27559 | 0.269576 | 0.512958 |
| Rab3gap1  | -0.12818 | 0.269498 | 0.512958 |
| Gm33497   | -1.68059 | 0.269266 | 0.512581 |
| Stag1     | -0.09    | 0.268915 | 0.512108 |
| Spopl     | -0.1616  | 0.268828 | 0.512008 |
| D830035M  | -1.17626 | 0.26852  | 0.511616 |
| Thsd7a    | -0.38059 | 0.26848  | 0.511605 |
| Pde6b     | -0.09286 | 0.268425 | 0.511574 |
| Pebp1     | -0.07153 | 0.268259 | 0.511425 |
| 4833417C  | -0.46968 | 0.26811  | 0.511291 |
| Zfp607b   | -0.37291 | 0.267592 | 0.510627 |
| 1600012H  | -0.1972  | 0.26734  | 0.510472 |
| Rnf13     | -0.1175  | 0.26724  | 0.510347 |
| Crispld2  | -0.65776 | 0.26721  | 0.510347 |
| Vstm2b    | -0.92456 | 0.267048 | 0.510241 |
| Alkbh5    | -0.08959 | 0.266851 | 0.51006  |
| Emb       | -0.97829 | 0.266458 | 0.509681 |
| Chd9      | -0.12674 | 0.266541 | 0.509681 |
| Tspoap1   | -0.42819 | 0.266461 | 0.509681 |
| Cfap70    | -1.4634  | 0.266073 | 0.509352 |
| Mpp4      | -0.1368  | 0.266146 | 0.509428 |
| Cwf19l2   | -0.11705 | 0.26602  | 0.509316 |
| Nckap1    | -0.08604 | 0.265983 | 0.509311 |
| Bicral    | -0.15312 | 0.265858 | 0.509186 |
| Gm37390   | -0.26878 | 0.265863 | 0.509186 |
| Pten      | -0.07581 | 0.265294 | 0.508315 |
| Cntl      | -0.12786 | 0.26516  | 0.508124 |
| Wbp4      | -0.09291 | 0.26504  | 0.508024 |

|           |          |          |          |
|-----------|----------|----------|----------|
| Chst3     | -0.38268 | 0.264983 | 0.507981 |
| Sap30l    | -0.10733 | 0.264809 | 0.507712 |
| Gm26873   | -0.78087 | 0.264573 | 0.507324 |
| Gm37181   | -18.2436 | 0.264347 | 0.507225 |
| Jtb       | -0.12517 | 0.264408 | 0.507267 |
| Zkscan3   | -0.11134 | 0.264342 | 0.507225 |
| Gm48890   | -0.46183 | 0.264257 | 0.507225 |
| Rab28     | -0.11531 | 0.264268 | 0.507225 |
| Fbxl15    | -0.22161 | 0.26421  | 0.507225 |
| Anp32a    | -0.05623 | 0.263976 | 0.506894 |
| Cat       | -0.12981 | 0.263936 | 0.506882 |
| Csnk2a1-p | -0.37626 | 0.263836 | 0.506758 |
| Ascl4     | -1.66026 | 0.263336 | 0.506054 |
| Tlcd3b    | -0.10289 | 0.263297 | 0.506043 |
| Hccs      | -0.19061 | 0.263266 | 0.506043 |
| Primpol   | -0.34519 | 0.263041 | 0.505748 |
| Ints14    | -0.24596 | 0.262839 | 0.505423 |
| Chd1      | -0.10841 | 0.262564 | 0.50509  |
| Nudt5     | -0.1759  | 0.262529 | 0.505087 |
| Gm42600   | -0.54401 | 0.26243  | 0.505035 |
| Ric1      | -0.15075 | 0.262435 | 0.505035 |
| Dcakd     | -0.2435  | 0.262415 | 0.505035 |
| Cyld      | -0.15989 | 0.262411 | 0.505035 |
| Trappc9   | -0.17647 | 0.262301 | 0.505035 |
| Ggnbp1    | -0.59197 | 0.261985 | 0.504525 |
| Pbld2     | -0.89756 | 0.26169  | 0.504163 |
| Nudt17    | -0.44094 | 0.261338 | 0.504071 |
| Snhg18    | -0.14262 | 0.261361 | 0.504071 |
| Gm43173   | -1.27531 | 0.261058 | 0.503745 |
| Gm45853   | -0.55219 | 0.261018 | 0.503732 |
| Setdb2    | -0.36325 | 0.260841 | 0.503522 |
| Arhgef12  | -0.06524 | 0.260804 | 0.503515 |
| Hectd2os  | -0.81232 | 0.260447 | 0.502955 |
| Akr1e1    | -0.21838 | 0.26033  | 0.502793 |
| Abhd17a   | -0.08962 | 0.260282 | 0.502767 |
| Gm36638   | -0.74154 | 0.26021  | 0.502757 |
| Gm26954   | -0.82218 | 0.259868 | 0.50216  |
| Gm38020   | -0.67198 | 0.259666 | 0.501836 |
| Qser1     | -0.12748 | 0.259625 | 0.501836 |
| Maea      | -0.13287 | 0.259615 | 0.501836 |
| 1010001B  | -0.5643  | 0.259506 | 0.501785 |
| Pik3ca    | -0.11052 | 0.259354 | 0.50162  |
| Natd1     | -0.30688 | 0.258964 | 0.501189 |
| mt-Tp     | -0.5018  | 0.258725 | 0.500857 |
| Bahcc1    | -0.24155 | 0.258328 | 0.500219 |
| 5430434F  | -0.54971 | 0.258104 | 0.500108 |
| Slc17a8   | -1.21365 | 0.257965 | 0.499968 |

|           |          |          |          |
|-----------|----------|----------|----------|
| Rab11fip2 | -0.16249 | 0.257944 | 0.499968 |
| Peg3      | -0.16179 | 0.257899 | 0.499968 |
| Gak       | -0.16063 | 0.25788  | 0.499968 |
| Scamp5    | -0.2109  | 0.257856 | 0.499968 |
| Iigp1     | -0.13471 | 0.257732 | 0.499968 |
| Mterf1a   | -0.33332 | 0.257723 | 0.499968 |
| 4930466K  | -0.43243 | 0.257449 | 0.499679 |
| Fign      | -0.36843 | 0.256958 | 0.498895 |
| Ipo13     | -0.28557 | 0.256978 | 0.498895 |
| Nup85     | -0.22923 | 0.256753 | 0.498652 |
| Zbtb38    | -0.09726 | 0.256564 | 0.498415 |
| Trpc4     | -0.3035  | 0.256369 | 0.49823  |
| Tufm      | -0.19788 | 0.256128 | 0.49789  |
| Ptprn2    | -1.63471 | 0.255651 | 0.497221 |
| Nf1       | -0.12946 | 0.255434 | 0.496992 |
| Gm42447   | -0.87013 | 0.255275 | 0.496765 |
| Ints10    | -0.22707 | 0.255284 | 0.496765 |
| Gm15587   | -0.64356 | 0.255186 | 0.496734 |
| Ndufs4    | -0.10236 | 0.255202 | 0.496734 |
| Zfp786    | -0.89095 | 0.255045 | 0.496622 |
| Abat      | -0.22489 | 0.255133 | 0.496731 |
| Gm14418   | -0.55499 | 0.255014 | 0.496622 |
| Bysl      | -0.25965 | 0.254951 | 0.496622 |
| C230013L  | -0.54643 | 0.25487  | 0.496605 |
| Plagl1    | -0.4712  | 0.254823 | 0.496577 |
| Ift80     | -0.25239 | 0.254792 | 0.496577 |
| Lrrc75b   | -0.3761  | 0.254693 | 0.496453 |
| Fank1     | -1.42189 | 0.254332 | 0.49588  |
| Bace1     | -0.17513 | 0.254425 | 0.495997 |
| Syng1     | -0.26657 | 0.254157 | 0.495667 |
| Ccn4      | -0.45491 | 0.253913 | 0.49532  |
| Ndufs5-ps | -0.16925 | 0.25385  | 0.495263 |
| Prkab2    | -0.25406 | 0.253479 | 0.494731 |
| Sun2      | -0.15801 | 0.253406 | 0.494654 |
| Gm42448   | -1.16363 | 0.253232 | 0.494378 |
| Ush2a     | -0.41866 | 0.253161 | 0.494305 |
| Trerf1    | -0.26177 | 0.252966 | 0.494052 |
| Atp5e     | -0.05624 | 0.252695 | 0.493652 |
| Chd8      | -0.11066 | 0.252502 | 0.493532 |
| Gm15828   | -1.48242 | 0.2523   | 0.493395 |
| Cwc22     | -0.18752 | 0.252384 | 0.493413 |
| Nim1k     | -0.20197 | 0.252346 | 0.493413 |
| Mast2     | -0.17697 | 0.252277 | 0.493395 |
| Snf8      | -0.12385 | 0.252244 | 0.493395 |
| Akap8l    | -0.12975 | 0.252112 | 0.493346 |
| Gm50196   | -0.93059 | 0.251879 | 0.492959 |
| Afap1l1   | -0.08992 | 0.251704 | 0.492809 |

|          |          |          |          |
|----------|----------|----------|----------|
| Tsfm     | -0.19475 | 0.25169  | 0.492809 |
| Gm4149   | -0.55137 | 0.251601 | 0.492737 |
| 4930447C | -0.51929 | 0.25146  | 0.49259  |
| Slc7a4   | -1.31314 | 0.251417 | 0.49257  |
| Map10    | -0.37458 | 0.250945 | 0.492026 |
| Gm38286  | -18.2392 | 0.250445 | 0.491445 |
| Agrn     | -0.09516 | 0.250531 | 0.491541 |
| Zfp280d  | -0.12004 | 0.250449 | 0.491445 |
| MLlt10   | -0.10884 | 0.250371 | 0.491419 |
| Pptc7    | -0.1755  | 0.250311 | 0.491366 |
| Hnrnpc   | -0.07954 | 0.249878 | 0.490639 |
| Zfp943   | -0.25961 | 0.249529 | 0.490154 |
| Ttll5    | -0.26893 | 0.249491 | 0.490143 |
| Gm45178  | -1.24674 | 0.249244 | 0.489787 |
| Zfp592   | -0.15704 | 0.249149 | 0.489664 |
| Brms1l   | -0.20474 | 0.249123 | 0.489664 |
| Trim2    | -0.18794 | 0.248817 | 0.489203 |
| Zfp280b  | -0.34577 | 0.248718 | 0.489074 |
| Ak4      | -0.4537  | 0.248033 | 0.488046 |
| Apbb1ip  | -0.88101 | 0.247628 | 0.487347 |
| Gm42701  | -0.40994 | 0.247645 | 0.487347 |
| Trps1    | -0.14817 | 0.247569 | 0.487326 |
| Spice1   | -0.23476 | 0.247484 | 0.487287 |
| Kif13a   | -0.17439 | 0.247464 | 0.487287 |
| Terb1    | -0.9184  | 0.247126 | 0.486723 |
| Zhx1     | -0.11867 | 0.247132 | 0.486723 |
| Gm37745  | -0.89464 | 0.246627 | 0.485982 |
| Gm43283  | -0.7698  | 0.246523 | 0.485932 |
| Ube3b    | -0.18485 | 0.246536 | 0.485932 |
| Mycn     | -0.43475 | 0.246395 | 0.485845 |
| Actr8    | -0.17987 | 0.246325 | 0.485837 |
| Gpr137b  | -0.25115 | 0.246253 | 0.485821 |
| Gm14296  | -0.35746 | 0.246163 | 0.485709 |
| Aopep    | -0.10602 | 0.24612  | 0.485709 |
| Nphp3    | -0.31038 | 0.24595  | 0.485607 |
| Gm43029  | -0.80979 | 0.245879 | 0.485532 |
| Fmn1     | -0.57008 | 0.245725 | 0.485361 |
| Nt5c     | -0.17221 | 0.245728 | 0.485361 |
| Flrt3    | -1.11627 | 0.24564  | 0.485316 |
| Klhdc2   | -0.15878 | 0.245433 | 0.485035 |
| Gm45200  | -0.77687 | 0.245271 | 0.48478  |
| Akap6    | -0.33482 | 0.244948 | 0.484362 |
| Gorasp1  | -0.35767 | 0.244883 | 0.484362 |
| Nat8f4   | -0.95382 | 0.244677 | 0.484052 |
| Zfp251   | -0.25475 | 0.244532 | 0.483837 |
| Med17    | -0.18966 | 0.244514 | 0.483837 |
| 1300002E | -0.16772 | 0.244406 | 0.483837 |

|           |          |          |          |
|-----------|----------|----------|----------|
| Kat2a     | -0.26442 | 0.243764 | 0.482883 |
| Amer2     | -0.18697 | 0.243627 | 0.48274  |
| Mkln1     | -0.08602 | 0.242998 | 0.481685 |
| Med1      | -0.12707 | 0.242852 | 0.481523 |
| Camkmt    | -0.35763 | 0.242787 | 0.481458 |
| Gm43339   | -0.49979 | 0.242686 | 0.481386 |
| Plekhh3   | -0.16947 | 0.242513 | 0.48117  |
| Rtn4rl1   | -0.32569 | 0.242471 | 0.48117  |
| Abcf1     | -0.10492 | 0.242293 | 0.480947 |
| Mtrr      | -0.34836 | 0.242204 | 0.480939 |
| Zfp26     | -0.2222  | 0.242128 | 0.480852 |
| Ddias     | -1.13549 | 0.241709 | 0.480307 |
| Smurf1    | -0.16753 | 0.24177  | 0.480317 |
| Vcpip1    | -0.14646 | 0.241726 | 0.480307 |
| Tceal6    | -1.48825 | 0.241404 | 0.479925 |
| Rnf146    | -0.13042 | 0.241405 | 0.479925 |
| Zfp677    | -0.86614 | 0.241314 | 0.479872 |
| Mmp16     | -1.22605 | 0.241019 | 0.479414 |
| Mdk       | -0.30512 | 0.240714 | 0.478989 |
| Fchsd2    | -0.15933 | 0.240656 | 0.478989 |
| Lsm7      | -0.14669 | 0.240576 | 0.478913 |
| Olig3     | -1.5494  | 0.240342 | 0.478638 |
| Mgat3     | -0.30715 | 0.240305 | 0.478628 |
| Dnph1     | -1.25247 | 0.240252 | 0.478586 |
| Ttc21b    | -0.29629 | 0.2402   | 0.478546 |
| B3gntl1   | -0.4983  | 0.240049 | 0.478373 |
| Kpna3     | -0.17667 | 0.239922 | 0.478184 |
| Carm1     | -0.21391 | 0.239833 | 0.478068 |
| Pfkfb2    | -0.26076 | 0.239787 | 0.478042 |
| Kdm5c     | -0.17581 | 0.239743 | 0.478017 |
| 6430571L1 | -0.52003 | 0.239669 | 0.477934 |
| Zw10      | -0.24545 | 0.239596 | 0.477901 |
| Gm48885   | -0.47175 | 0.239598 | 0.477901 |
| Gm37488   | -0.96938 | 0.239523 | 0.477896 |
| Nsmce3    | -0.14876 | 0.239395 | 0.47777  |
| Gsn       | -0.24192 | 0.239352 | 0.477747 |
| Capn10    | -0.36689 | 0.239316 | 0.47774  |
| Nxn1      | -0.19228 | 0.23921  | 0.477591 |
| Alg1      | -0.21114 | 0.239101 | 0.477501 |
| Pank3     | -0.13206 | 0.239088 | 0.477501 |
| Cyb5rl    | -0.57649 | 0.238851 | 0.477128 |
| Letm1     | -0.16058 | 0.23838  | 0.476378 |
| Pan2      | -0.21468 | 0.238118 | 0.475919 |
| Eid2b     | -0.20353 | 0.238057 | 0.475909 |
| Pofut2    | -0.1567  | 0.237714 | 0.475301 |
| Sh2b1     | -0.21641 | 0.237572 | 0.475143 |
| Gm42444   | -1.31806 | 0.23745  | 0.475011 |

|           |          |          |          |
|-----------|----------|----------|----------|
| B3galt6   | -0.34725 | 0.237398 | 0.475011 |
| Tsacc     | -0.68903 | 0.237095 | 0.474635 |
| Rfx7      | -0.1786  | 0.237042 | 0.474635 |
| Lss       | -0.3409  | 0.236991 | 0.474634 |
| Atad5     | -0.3359  | 0.237    | 0.474634 |
| Mtss2     | -0.2321  | 0.236517 | 0.474048 |
| Zscan18   | -0.45645 | 0.236388 | 0.473916 |
| Gm16060   | -0.59133 | 0.236366 | 0.473916 |
| Ptpn6     | -1.0797  | 0.235934 | 0.473259 |
| Otub2     | -0.49323 | 0.235733 | 0.472919 |
| Rtl5      | -0.54703 | 0.235631 | 0.472841 |
| Fam53c    | -0.20964 | 0.235666 | 0.472849 |
| Fhod3     | -0.3705  | 0.235387 | 0.472566 |
| Wdr7      | -0.27044 | 0.235302 | 0.472561 |
| Slc4a3    | -0.39421 | 0.235117 | 0.472347 |
| Rsf1      | -0.10088 | 0.235004 | 0.472297 |
| Rny1      | -0.89646 | 0.234693 | 0.471782 |
| 3110070V  | -0.78396 | 0.234395 | 0.471319 |
| Wdr47     | -0.16952 | 0.234502 | 0.471459 |
| Fbxo33    | -0.21997 | 0.234383 | 0.471319 |
| Mrpl36    | -0.14814 | 0.234256 | 0.471282 |
| Gm27032   | -0.85558 | 0.234086 | 0.47105  |
| Dop1a     | -0.12864 | 0.234109 | 0.47105  |
| Tbx6      | -0.72758 | 0.233922 | 0.470862 |
| Nudt16l1  | -0.18701 | 0.233894 | 0.470862 |
| mt-Ts1    | -0.73173 | 0.233839 | 0.470822 |
| Wapl      | -0.08845 | 0.233637 | 0.470542 |
| Gm37626   | -0.30844 | 0.233399 | 0.47019  |
| Tbc1d24   | -0.20608 | 0.233224 | 0.469901 |
| Atp6v0a2  | -0.1596  | 0.233135 | 0.469857 |
| Yeats4    | -0.16012 | 0.233065 | 0.469833 |
| Iftap     | -0.16267 | 0.232944 | 0.469652 |
| Zrsr1     | -0.1538  | 0.232684 | 0.469445 |
| Zfp951    | -0.53765 | 0.232465 | 0.46923  |
| Syncrip   | -0.11245 | 0.232487 | 0.46923  |
| Cnrip1    | -0.24033 | 0.232302 | 0.469138 |
| Psmg3     | -0.20722 | 0.232161 | 0.469021 |
| C230071H  | -0.57175 | 0.232052 | 0.468905 |
| Clasrp    | -0.24491 | 0.232072 | 0.468905 |
| Usf3      | -0.16686 | 0.231924 | 0.468731 |
| Tmem243   | -0.12732 | 0.231611 | 0.468353 |
| Xndc1     | -0.31219 | 0.231486 | 0.468163 |
| Mdn1      | -0.27084 | 0.231478 | 0.468163 |
| Ube4a     | -0.16321 | 0.231417 | 0.46815  |
| Rccd1     | -0.34413 | 0.231363 | 0.46815  |
| Lbr       | -0.11157 | 0.231369 | 0.46815  |
| D73000311 | -0.23004 | 0.231283 | 0.468132 |

|          |          |          |          |
|----------|----------|----------|----------|
| Nt5e     | -0.24644 | 0.231098 | 0.467821 |
| Kmt2d    | -0.13166 | 0.231074 | 0.467821 |
| Bms1     | -0.1494  | 0.231013 | 0.467821 |
| Gon7     | -0.23287 | 0.23064  | 0.467272 |
| Mrps35   | -0.19447 | 0.230246 | 0.466853 |
| Mreg     | -0.66652 | 0.23018  | 0.466782 |
| St3gal2  | -0.16712 | 0.230172 | 0.466782 |
| Igsf3    | -0.59892 | 0.230105 | 0.466757 |
| Ccdc169  | -1.53165 | 0.22986  | 0.466387 |
| Stx1b    | -0.51063 | 0.229668 | 0.466123 |
| Gm48532  | -1.43836 | 0.229443 | 0.465856 |
| Ncl      | -0.06692 | 0.229497 | 0.465902 |
| A730081D | -0.88122 | 0.229148 | 0.465383 |
| Tada2a   | -0.18721 | 0.229117 | 0.465383 |
| Prxl2c   | -0.11728 | 0.22913  | 0.465383 |
| Adrb1    | -0.42961 | 0.229012 | 0.465296 |
| Enox2    | -0.26155 | 0.228835 | 0.46518  |
| Pot1b    | -0.26026 | 0.228451 | 0.464471 |
| Nol11    | -0.16313 | 0.228188 | 0.464127 |
| Ska2     | -0.23931 | 0.228177 | 0.464127 |
| Spred2   | -0.16628 | 0.228129 | 0.464127 |
| Secisbp2 | -0.1906  | 0.228014 | 0.464025 |
| Actr6    | -0.21176 | 0.227648 | 0.463594 |
| Gm48045  | -1.36625 | 0.227395 | 0.463332 |
| Papolg   | -0.27849 | 0.227341 | 0.463284 |
| Arhgap27 | -0.15886 | 0.227322 | 0.463284 |
| Nop2     | -0.3155  | 0.22723  | 0.463185 |
| Dnah7b   | -0.47821 | 0.226974 | 0.462788 |
| Gne      | -0.22342 | 0.227007 | 0.462793 |
| Zfp3     | -0.55136 | 0.226969 | 0.462788 |
| Cnot7    | -0.15352 | 0.226958 | 0.462788 |
| Paqr6    | -0.65653 | 0.226852 | 0.462788 |
| Mindy3   | -0.18874 | 0.226888 | 0.462788 |
| Rsb1l    | -0.0913  | 0.226848 | 0.462788 |
| Syvn1    | -0.21011 | 0.22665  | 0.462549 |
| Rtbdn    | -0.13322 | 0.226671 | 0.462549 |
| Nabp2    | -0.1461  | 0.226643 | 0.462549 |
| Alg13    | -0.35501 | 0.226512 | 0.462477 |
| Lrrc8e   | -1.64441 | 0.226348 | 0.462205 |
| Gm10762  | -0.41755 | 0.226314 | 0.462198 |
| Pdhh     | -0.14442 | 0.225768 | 0.461272 |
| Gm15672  | -0.54473 | 0.225382 | 0.460665 |
| Gpx8     | -0.19702 | 0.225409 | 0.460665 |
| BC029722 | -0.17891 | 0.225351 | 0.460665 |
| Rpa1     | -0.22244 | 0.225132 | 0.460286 |
| Ccdc85c  | -0.24739 | 0.22511  | 0.460286 |
| Cxcl16   | -0.3349  | 0.225056 | 0.460256 |



|          |          |          |          |
|----------|----------|----------|----------|
| Zfp78    | -0.45564 | 0.22481  | 0.460025 |
| Rad9b    | -0.40297 | 0.224676 | 0.45992  |
| H2ac6    | -0.56263 | 0.224618 | 0.45992  |
| Thop1    | -0.38265 | 0.224535 | 0.459854 |
| Banp     | -0.20307 | 0.224471 | 0.459813 |
| Stxbp4   | -0.31256 | 0.22436  | 0.459776 |
| Gm48566  | -1.30614 | 0.224074 | 0.459503 |
| Mon2     | -0.13845 | 0.224252 | 0.459704 |
| Add2     | -0.7265  | 0.22402  | 0.459494 |
| Sirt3    | -0.23956 | 0.224039 | 0.459494 |
| Tbcel    | -0.16988 | 0.22379  | 0.459488 |
| Mphosph1 | -0.15527 | 0.223641 | 0.459307 |
| Gm44220  | -0.19762 | 0.223576 | 0.459238 |
| Slc35b2  | -0.21901 | 0.223553 | 0.459238 |
| Dnah8    | -0.30201 | 0.223488 | 0.459238 |
| Gm33378  | -1.03631 | 0.223356 | 0.459226 |
| Mre11a   | -0.29284 | 0.223462 | 0.459238 |
| Apba3    | -0.29474 | 0.223462 | 0.459238 |
| Gm3365   | -0.96398 | 0.222734 | 0.45808  |
| Tom1l2   | -0.13033 | 0.222737 | 0.45808  |
| Ppwd1    | -0.17616 | 0.222669 | 0.45808  |
| Mrpl49   | -0.18263 | 0.222556 | 0.458022 |
| ENSMUSG  | -0.19988 | 0.222522 | 0.458022 |
| Heatr6   | -0.19138 | 0.22213  | 0.457397 |
| Nfe2l1   | -0.08477 | 0.221817 | 0.457129 |
| Glyctk   | -0.90302 | 0.221685 | 0.456983 |
| Papss1   | -0.1387  | 0.221652 | 0.456978 |
| Abl1     | -0.1855  | 0.221576 | 0.45694  |
| Hykk     | -0.32843 | 0.221469 | 0.456834 |
| 5730414N | -0.49918 | 0.221414 | 0.456802 |
| Hdgfl2   | -0.16447 | 0.221231 | 0.456549 |
| Arf3     | -0.13363 | 0.220756 | 0.456009 |
| Clpx     | -0.15021 | 0.220645 | 0.456009 |
| Nutf2    | -0.72752 | 0.220184 | 0.455206 |
| Gm43167  | -1.22217 | 0.220154 | 0.455206 |
| Spsb4    | -18.6606 | 0.219997 | 0.455069 |
| Adsl     | -0.24928 | 0.219995 | 0.455069 |
| Rab36    | -0.69486 | 0.219494 | 0.454502 |
| Sik3     | -0.14715 | 0.219459 | 0.454502 |
| Gm37262  | -0.82965 | 0.219286 | 0.454352 |
| Teddm2   | -0.60473 | 0.219209 | 0.454312 |
| Qpct     | -0.76691 | 0.219099 | 0.454217 |
| Klhl36   | -0.23883 | 0.219037 | 0.45415  |
| Gm28941  | -1.05505 | 0.218586 | 0.453403 |
| Ube2d-ps | -0.26156 | 0.218519 | 0.453328 |
| Miga1    | -0.21589 | 0.21837  | 0.453081 |
| 4930453N | -0.15918 | 0.218367 | 0.453081 |

|           |          |          |          |
|-----------|----------|----------|----------|
| 1500002C: | -0.71135 | 0.218112 | 0.452735 |
| Sh3pxd2b  | -0.27467 | 0.218081 | 0.452735 |
| Lmo2      | -0.07828 | 0.218083 | 0.452735 |
| Fdft1     | -0.27999 | 0.218072 | 0.452735 |
| Gm48701   | -1.23253 | 0.217863 | 0.452579 |
| Prkrip1   | -0.18291 | 0.217886 | 0.452579 |
| Cd2bp2    | -0.19324 | 0.217839 | 0.452579 |
| Gnal      | -0.69015 | 0.217754 | 0.452493 |
| Pag1      | -0.37941 | 0.217547 | 0.452125 |
| Dnaaf4    | -0.80285 | 0.217419 | 0.451933 |
| Adam22    | -0.61203 | 0.217424 | 0.451933 |
| Syne4     | -1.22934 | 0.21728  | 0.451759 |
| Gm42685   | -1.08837 | 0.217085 | 0.451478 |
| Pacc1     | -0.51139 | 0.217023 | 0.451413 |
| Gm37186   | -0.54089 | 0.216929 | 0.451281 |
| Safb2     | -0.13283 | 0.216248 | 0.45005  |
| Gm11808   | -0.31831 | 0.215945 | 0.449733 |
| Gm49159   | -18.6583 | 0.215724 | 0.449523 |
| Mapk8ip2  | -0.58692 | 0.215795 | 0.449546 |
| Tmem71    | -0.32334 | 0.215691 | 0.449516 |
| Usp32     | -0.17397 | 0.215625 | 0.449442 |
| Gm10575   | -0.34439 | 0.215565 | 0.449379 |
| Sgtb      | -0.30998 | 0.214828 | 0.448405 |
| Coro1b    | -0.36868 | 0.214546 | 0.447989 |
| Srrm1     | -0.07853 | 0.214228 | 0.447464 |
| Trappc12  | -0.22682 | 0.214011 | 0.447074 |
| Zfp866    | -0.25997 | 0.213898 | 0.446958 |
| Anks1     | -0.14288 | 0.213888 | 0.446958 |
| 9330121JC | -1.09086 | 0.213257 | 0.44612  |
| Ift57     | -0.23225 | 0.213344 | 0.446241 |
| Gpm6a     | -0.20492 | 0.213203 | 0.44607  |
| Gm4673    | -0.39439 | 0.213063 | 0.445902 |
| Brd9      | -0.1218  | 0.21258  | 0.445224 |
| Zfp654    | -0.1887  | 0.212545 | 0.445224 |
| Slc26a8   | -1.17619 | 0.2121   | 0.444674 |
| Rrp15     | -0.24939 | 0.211961 | 0.444651 |
| Gm38329   | -0.91702 | 0.211576 | 0.444149 |
| Retreg3   | -0.1534  | 0.211602 | 0.444149 |
| Ssbp1     | -0.15119 | 0.211516 | 0.444149 |
| Clec2l    | -1.41657 | 0.211381 | 0.443932 |
| Gm10097   | -0.5889  | 0.211269 | 0.443802 |
| Gvin1     | -0.44834 | 0.211134 | 0.443725 |
| Mettl2    | -0.36869 | 0.210968 | 0.443626 |
| Npas3     | -0.75082 | 0.210689 | 0.443102 |
| 4930431P: | -0.35724 | 0.210639 | 0.443059 |
| St8sia2   | -0.53986 | 0.210605 | 0.443049 |
| Gm10353   | -0.66569 | 0.210472 | 0.442894 |

|           |          |          |          |
|-----------|----------|----------|----------|
| Syp       | -0.19022 | 0.210471 | 0.442894 |
| Gm37802   | -1.14852 | 0.210344 | 0.442872 |
| Katnip    | -0.1814  | 0.210435 | 0.442894 |
| Gm43750   | -1.60012 | 0.210235 | 0.442768 |
| Nrp2      | -0.12152 | 0.210333 | 0.442872 |
| Psd       | -0.28949 | 0.21022  | 0.442768 |
| Arid1a    | -0.09356 | 0.210227 | 0.442768 |
| Ccdc126   | -0.18586 | 0.210202 | 0.442768 |
| Rbm7      | -0.11311 | 0.210163 | 0.442768 |
| Dnal1     | -0.30486 | 0.210122 | 0.442768 |
| Dync1i2   | -0.08356 | 0.210128 | 0.442768 |
| 9530085L1 | -0.34028 | 0.210088 | 0.442768 |
| Zfp146    | -0.34634 | 0.210073 | 0.442768 |
| Dach2     | -0.83966 | 0.210046 | 0.442768 |
| Gm15983   | -0.97514 | 0.209934 | 0.442757 |
| Pard6a    | -0.29961 | 0.209928 | 0.442757 |
| Gm43513   | -0.73535 | 0.209674 | 0.442396 |
| Pigm      | -0.22102 | 0.209745 | 0.442483 |
| Gm48870   | -0.5196  | 0.20964  | 0.442385 |
| Ppa2      | -0.17344 | 0.209622 | 0.442385 |
| 3110001I2 | -0.55261 | 0.20953  | 0.442344 |
| E130309D  | -0.27899 | 0.209529 | 0.442344 |
| Polr3b    | -0.32867 | 0.209467 | 0.442344 |
| Cdadcl    | -0.19113 | 0.209268 | 0.442101 |
| Rpf1      | -0.16475 | 0.209092 | 0.441791 |
| Sarm1     | -0.52025 | 0.208814 | 0.441264 |
| Ube2t     | -0.72405 | 0.208449 | 0.440681 |
| Arrb2     | -0.27897 | 0.208515 | 0.440756 |
| Man1c1    | -0.23109 | 0.208184 | 0.440307 |
| Slc22a29  | -1.50019 | 0.207932 | 0.439837 |
| Nab1      | -0.12491 | 0.207665 | 0.439394 |
| Gm47160   | -0.28055 | 0.207608 | 0.439337 |
| Uba6      | -0.21842 | 0.20759  | 0.439337 |
| Yipf6     | -0.1779  | 0.207512 | 0.439337 |
| Ccnc      | -0.2269  | 0.20704  | 0.438693 |
| Gm45343   | -0.44171 | 0.206747 | 0.438196 |
| Tmem229l  | -0.26165 | 0.206778 | 0.438199 |
| Ptpn20    | -17.8576 | 0.206548 | 0.438023 |
| Golga1    | -0.19275 | 0.206723 | 0.438196 |
| Gm42597   | -17.1312 | 0.206432 | 0.437837 |
| Zfp334    | -0.33157 | 0.206584 | 0.438036 |
| Plk5      | -0.22639 | 0.206415 | 0.437837 |
| Gm45289   | -0.63867 | 0.206336 | 0.437758 |
| Vps33a    | -0.25058 | 0.206315 | 0.437758 |
| Aftph     | -0.12921 | 0.206013 | 0.437259 |
| Recql     | -0.31163 | 0.205796 | 0.436985 |
| Prtg      | -0.56523 | 0.205613 | 0.436659 |

|           |          |          |          |
|-----------|----------|----------|----------|
| Eaf1      | -0.19585 | 0.205569 | 0.436626 |
| Map2k5    | -0.24929 | 0.205435 | 0.436403 |
| Celf4     | -0.32487 | 0.205231 | 0.436031 |
| Supt4a    | -0.11254 | 0.204964 | 0.43565  |
| Gm42801   | -1.65627 | 0.204479 | 0.434924 |
| Hrc       | -0.33173 | 0.204385 | 0.434851 |
| Nfatc3    | -0.15775 | 0.204112 | 0.434512 |
| Gm45159   | -0.88319 | 0.204032 | 0.43447  |
| Ptpn2     | -0.22711 | 0.204075 | 0.434501 |
| Akap8     | -0.12678 | 0.203987 | 0.43447  |
| Fastkd2   | -0.50555 | 0.203932 | 0.43447  |
| Gm5914    | -0.34566 | 0.20394  | 0.43447  |
| Amz2      | -0.17805 | 0.203787 | 0.43447  |
| Gramd3    | -0.41203 | 0.203695 | 0.434372 |
| Rps15a-ps | -0.81829 | 0.202986 | 0.433229 |
| Tmem186   | -0.38393 | 0.202878 | 0.433062 |
| Depdc5    | -0.2684  | 0.202836 | 0.433034 |
| Shisa4    | -0.33438 | 0.202813 | 0.433034 |
| Gm42940   | -0.76183 | 0.202435 | 0.432437 |
| Mccc1     | -0.2771  | 0.202308 | 0.432276 |
| Katnb1    | -0.36409 | 0.202247 | 0.432206 |
| Slc25a33  | -0.19256 | 0.202226 | 0.432206 |
| Rassf9    | -0.10581 | 0.202144 | 0.432109 |
| Nup43     | -0.40569 | 0.201903 | 0.431719 |
| Gm44676   | -18.7776 | 0.201706 | 0.431543 |
| Gm18194   | -0.77508 | 0.201772 | 0.431561 |
| Lifr      | -0.11656 | 0.201761 | 0.431561 |
| Kif5c     | -0.3004  | 0.20149  | 0.431204 |
| Rdh12     | -0.15254 | 0.201028 | 0.430401 |
| Wnk3      | -0.83406 | 0.20092  | 0.43023  |
| Zfp780b   | -0.25649 | 0.200809 | 0.430054 |
| Tmem62    | -0.44581 | 0.200742 | 0.429972 |
| Hebp2     | -0.34604 | 0.20049  | 0.429617 |
| LTO1      | -0.27607 | 0.200422 | 0.429534 |
| Ccdc113   | -0.73563 | 0.200001 | 0.428816 |
| 4921504A  | -0.87595 | 0.199741 | 0.428564 |
| Ddx51     | -0.37043 | 0.199574 | 0.428385 |
| Scg3      | -0.48133 | 0.199479 | 0.428248 |
| Gm49085   | -0.85242 | 0.199313 | 0.427952 |
| Armc6     | -0.45604 | 0.199051 | 0.427635 |
| Gm37607   | -0.6017  | 0.19864  | 0.427137 |
| 6430590A  | -0.26878 | 0.198612 | 0.427137 |
| Igip      | -0.17887 | 0.198618 | 0.427137 |
| Pccb      | -0.30885 | 0.198573 | 0.427137 |
| Lsm3      | -0.18513 | 0.198574 | 0.427137 |
| Hlf       | -0.14336 | 0.198108 | 0.426623 |
| Faim2     | -0.9677  | 0.197949 | 0.426553 |

|          |          |          |          |
|----------|----------|----------|----------|
| Lonp2    | -0.15686 | 0.198007 | 0.426617 |
| Zfp874b  | -0.33957 | 0.197775 | 0.426241 |
| Srp68    | -0.17347 | 0.197758 | 0.426241 |
| A830082N | -0.50786 | 0.197559 | 0.425897 |
| Hsf1     | -0.19252 | 0.197209 | 0.425325 |
| Pou3f2   | -1.11926 | 0.196558 | 0.424166 |
| Pdgfa    | -0.15244 | 0.196651 | 0.424184 |
| Mtrf1l   | -0.26549 | 0.196514 | 0.424132 |
| Commd9   | -0.26274 | 0.196279 | 0.423852 |
| Gm49201  | -1.04003 | 0.196098 | 0.423662 |
| Pwwp3b   | -0.46332 | 0.195948 | 0.42346  |
| Morn4    | -0.63121 | 0.195923 | 0.42346  |
| Gm37409  | -1.20625 | 0.19574  | 0.423407 |
| Ubqln2   | -0.15288 | 0.19589  | 0.423457 |
| Gm38042  | -0.42606 | 0.195803 | 0.423407 |
| Gabpa    | -0.17565 | 0.195826 | 0.423407 |
| Galnt10  | -0.20477 | 0.195838 | 0.423407 |
| Yif1a    | -0.18897 | 0.195741 | 0.423407 |
| Olfml3   | -0.81897 | 0.195591 | 0.423301 |
| Dnajc21  | -0.147   | 0.195652 | 0.423371 |
| Snrnp25  | -0.25552 | 0.19534  | 0.423001 |
| Uck1     | -0.27562 | 0.195274 | 0.422919 |
| Zcchc4   | -0.33154 | 0.195235 | 0.422896 |
| Gm10062  | -0.6484  | 0.19502  | 0.422637 |
| Rad1     | -0.28261 | 0.194974 | 0.422636 |
| Gm13835  | -0.90591 | 0.194123 | 0.421363 |
| Clu      | -0.15862 | 0.194191 | 0.421363 |
| Tax1bp1  | -0.0732  | 0.193856 | 0.421049 |
| Snhg9    | -0.28749 | 0.193737 | 0.420869 |
| Slc1a3   | -0.26719 | 0.193402 | 0.420386 |
| Tmcc1    | -0.13291 | 0.193269 | 0.420219 |
| Cul9     | -0.3062  | 0.193147 | 0.420074 |
| Edrf1    | -0.27777 | 0.192882 | 0.419742 |
| Clec11a  | -0.84626 | 0.192648 | 0.419295 |
| Gabrg2   | -1.18147 | 0.192493 | 0.419017 |
| Rxra     | -0.19974 | 0.192258 | 0.418645 |
| Nup133   | -0.27028 | 0.192223 | 0.418645 |
| Frrs1l   | -1.30095 | 0.191963 | 0.418473 |
| Rpp30    | -0.20652 | 0.192105 | 0.418605 |
| Rbm14    | -0.2549  | 0.192108 | 0.418605 |
| Wdr41    | -0.3489  | 0.191778 | 0.418131 |
| Prr11    | -0.74746 | 0.19151  | 0.417668 |
| Gm37663  | -0.43377 | 0.191336 | 0.417592 |
| Ice2     | -0.26594 | 0.191289 | 0.41755  |
| Dvl2     | -0.31202 | 0.191171 | 0.417476 |
| 1700019D | -0.58724 | 0.19116  | 0.417476 |
| 4921507G | -18.4874 | 0.190904 | 0.417136 |

|           |          |          |          |
|-----------|----------|----------|----------|
| Sema5b    | -0.99143 | 0.190854 | 0.417087 |
| Gm14541   | -1.6045  | 0.190625 | 0.416856 |
| Tbc1d16   | -0.32553 | 0.190705 | 0.416883 |
| Snx8      | -0.44068 | 0.190592 | 0.416856 |
| Crispld1  | -0.22934 | 0.190559 | 0.416856 |
| Cdr2      | -0.20121 | 0.190442 | 0.416856 |
| Sptb      | -0.54056 | 0.190369 | 0.416856 |
| Crocc     | -0.22916 | 0.190092 | 0.416394 |
| Ppp2r1a   | -0.1227  | 0.190091 | 0.416394 |
| Gm31282   | -1.27876 | 0.189925 | 0.416213 |
| Crybb3    | -0.35555 | 0.190019 | 0.416357 |
| Jam3      | -0.22331 | 0.189916 | 0.416213 |
| Adcy9     | -0.22115 | 0.189739 | 0.416047 |
| Gm10244   | -1.24187 | 0.189271 | 0.415405 |
| Lynx1     | -0.23876 | 0.189196 | 0.415343 |
| Cep63     | -0.23431 | 0.189    | 0.415157 |
| Stab1     | -0.17282 | 0.188953 | 0.415114 |
| Usf1      | -0.20005 | 0.188887 | 0.415079 |
| Brf1      | -0.22446 | 0.188836 | 0.415039 |
| H4f16     | -0.61179 | 0.18871  | 0.414825 |
| Irgq      | -0.2552  | 0.188437 | 0.414407 |
| Otud4     | -0.14197 | 0.188414 | 0.414407 |
| Fbf1      | -0.29539 | 0.188369 | 0.414378 |
| 0610009B  | -0.18904 | 0.188063 | 0.413888 |
| Spg7      | -0.18649 | 0.187476 | 0.4129   |
| Bcl2      | -0.25186 | 0.187365 | 0.412837 |
| Gm45235   | -1.44578 | 0.187123 | 0.412425 |
| Ube2n     | -0.12025 | 0.187043 | 0.412311 |
| A930003O  | -0.37992 | 0.186832 | 0.411905 |
| Zmym1     | -0.29085 | 0.18665  | 0.411625 |
| C2cd5     | -0.22753 | 0.186615 | 0.411608 |
| Tbccd1    | -0.33033 | 0.18657  | 0.411608 |
| Gm38387   | -0.89885 | 0.186491 | 0.411518 |
| Gtdc1     | -0.24854 | 0.186237 | 0.411078 |
| B4galnt4  | -1.11502 | 0.185921 | 0.410764 |
| Spty2d1   | -0.17263 | 0.186087 | 0.410812 |
| Marchf1   | -0.25173 | 0.186068 | 0.410812 |
| Med22     | -0.23063 | 0.185972 | 0.410795 |
| Mia2      | -0.15185 | 0.18593  | 0.410764 |
| Ptms      | -0.06623 | 0.185744 | 0.410521 |
| Gm36262   | -1.06972 | 0.185369 | 0.41007  |
| Gadd45a   | -0.23386 | 0.185234 | 0.409849 |
| Ripor1    | -0.11412 | 0.185242 | 0.409849 |
| Bap1      | -0.22302 | 0.185138 | 0.40974  |
| Ankrd54   | -0.24394 | 0.185103 | 0.409721 |
| Pex13     | -0.21097 | 0.18508  | 0.409721 |
| 1190007I0 | -0.26989 | 0.184743 | 0.409167 |

|           |          |          |          |
|-----------|----------|----------|----------|
| Gls       | -0.10297 | 0.18436  | 0.408501 |
| Dbi       | -0.07929 | 0.184285 | 0.408414 |
| Aptx      | -0.30403 | 0.184253 | 0.408414 |
| Gm45342   | -0.56878 | 0.183903 | 0.407791 |
| Tdp1      | -0.39314 | 0.183964 | 0.407864 |
| Gm15283   | -0.4253  | 0.183759 | 0.407623 |
| Styx      | -0.25454 | 0.183655 | 0.407584 |
| Rbm25     | -0.08325 | 0.183674 | 0.407584 |
| Ulk3      | -0.40769 | 0.183572 | 0.407538 |
| Snrpa     | -0.17003 | 0.183038 | 0.406473 |
| Senp8     | -0.67773 | 0.182957 | 0.406355 |
| Cldn12    | -0.40457 | 0.182568 | 0.405773 |
| Gm48114   | -0.67941 | 0.182406 | 0.405513 |
| Mrps10    | -0.20566 | 0.18239  | 0.405513 |
| Trp53inp2 | -0.17412 | 0.182198 | 0.40521  |
| Myo7a     | -0.89925 | 0.182081 | 0.40501  |
| Ccdc63    | -0.66239 | 0.181979 | 0.40486  |
| Lmod1     | -0.32973 | 0.181963 | 0.40486  |
| Smarca5   | -0.1105  | 0.181987 | 0.40486  |
| Zfp868    | -0.30502 | 0.181816 | 0.40466  |
| Gm44777   | -0.46501 | 0.181519 | 0.404119 |
| Ccdc166   | -0.43197 | 0.180915 | 0.403153 |
| Gmps      | -0.16829 | 0.180674 | 0.402716 |
| Atp9b     | -0.21236 | 0.180344 | 0.402161 |
| Gm43858   | -0.88705 | 0.180285 | 0.402143 |
| Akap5     | -1.33037 | 0.17999  | 0.401731 |
| Nwd1      | -0.88004 | 0.180061 | 0.40183  |
| Ston2     | -0.40877 | 0.179981 | 0.401731 |
| Zc3h13    | -0.11821 | 0.179838 | 0.401571 |
| Parp10    | -0.2858  | 0.179642 | 0.401253 |
| Gm17249   | -0.62764 | 0.179465 | 0.400917 |
| Slc7a3    | -1.10723 | 0.179295 | 0.400778 |
| Samd12    | -0.18709 | 0.179402 | 0.400836 |
| Fam149b   | -0.24139 | 0.179389 | 0.400836 |
| Chd2      | -0.14827 | 0.179257 | 0.400752 |
| Ap1g1     | -0.16402 | 0.179053 | 0.400476 |
| Cdk11b    | -0.11368 | 0.178641 | 0.399973 |
| Ldhb      | -0.13614 | 0.178451 | 0.399835 |
| Apoo      | -0.26923 | 0.178438 | 0.399835 |
| Nfic      | -0.08148 | 0.178389 | 0.399827 |
| Tyw5      | -0.29499 | 0.17834  | 0.399777 |
| Nampt     | -0.1329  | 0.178326 | 0.399777 |
| Dpf3      | -0.27002 | 0.178255 | 0.399705 |
| Ngly1     | -0.18833 | 0.177934 | 0.399105 |
| Zfp317    | -0.31485 | 0.177871 | 0.399024 |
| Gnb5      | -0.12958 | 0.177629 | 0.398779 |
| Parp6     | -0.24199 | 0.177613 | 0.398779 |

|           |          |          |          |
|-----------|----------|----------|----------|
| Cygb      | -0.1664  | 0.177598 | 0.398779 |
| Plrg1     | -0.23244 | 0.177552 | 0.398779 |
| Ipo5      | -0.20532 | 0.177509 | 0.398779 |
| 4930565N  | -1.1932  | 0.177338 | 0.398605 |
| Tarbp1    | -0.47611 | 0.177391 | 0.398612 |
| D030047H  | -17.5413 | 0.177132 | 0.398321 |
| Acvr2a    | -0.2845  | 0.177118 | 0.398321 |
| Rae1      | -0.19946 | 0.176948 | 0.398147 |
| Gm14286   | -1.4149  | 0.176839 | 0.39802  |
| Tmem18    | -0.30568 | 0.176904 | 0.398107 |
| Gm43484   | -0.50083 | 0.176177 | 0.396808 |
| Utp4      | -0.2696  | 0.176194 | 0.396808 |
| Aasdhppt  | -0.19807 | 0.176113 | 0.396745 |
| Gm17705   | -1.26746 | 0.175949 | 0.396527 |
| Ube2v2    | -0.12352 | 0.176014 | 0.396581 |
| Mrpl50    | -0.18594 | 0.175883 | 0.396466 |
| 2610020Ci | -0.48928 | 0.175773 | 0.396336 |
| Tgfbr3l   | -1.24606 | 0.175458 | 0.395862 |
| Rbm12     | -0.25056 | 0.17551  | 0.395862 |
| Eipr1     | -0.34286 | 0.175433 | 0.395862 |
| Trim36    | -0.59015 | 0.175326 | 0.395745 |
| Cnot4     | -0.12857 | 0.175305 | 0.395745 |
| Gm47198   | -1.72494 | 0.175076 | 0.395388 |
| 2810428JC | -0.79851 | 0.17492  | 0.395186 |
| Smim40    | -0.16608 | 0.175031 | 0.395377 |
| Igtp      | -0.19458 | 0.174865 | 0.395123 |
| Tasor2    | -0.19468 | 0.174702 | 0.394844 |
| Gm44883   | -1.71345 | 0.174493 | 0.394521 |
| Sfxn4     | -0.46923 | 0.174334 | 0.39422  |
| Abraxas2  | -0.19194 | 0.174319 | 0.39422  |
| Pnir      | -0.09048 | 0.174218 | 0.394076 |
| Gga3      | -0.30123 | 0.174185 | 0.394061 |
| Tmem127   | -0.19363 | 0.173786 | 0.393278 |
| Cox10     | -0.29706 | 0.173627 | 0.393037 |
| Arhgef1   | -0.12554 | 0.173431 | 0.392711 |
| Fbxo7     | -0.19523 | 0.173405 | 0.392711 |
| Cadps2    | -0.93508 | 0.173289 | 0.392612 |
| Mical2    | -0.53601 | 0.173004 | 0.39222  |
| 9630001P: | -1.39493 | 0.172943 | 0.39214  |
| Mcm10     | -1.55858 | 0.172573 | 0.39136  |
| Scai      | -0.21639 | 0.172456 | 0.391274 |
| Daam2     | -0.19531 | 0.172252 | 0.390988 |
| Fat1      | -0.32953 | 0.172135 | 0.390841 |
| Uba5      | -0.1909  | 0.171777 | 0.390145 |
| Haus3     | -0.23589 | 0.171683 | 0.389992 |
| Spdya     | -0.85649 | 0.171567 | 0.389932 |
| Frmpd1    | -0.31417 | 0.171576 | 0.389932 |



|           |          |          |          |
|-----------|----------|----------|----------|
| Ero1b     | -0.40391 | 0.17142  | 0.389932 |
| Naa25     | -0.25171 | 0.17145  | 0.389932 |
| Usp38     | -0.25798 | 0.171201 | 0.389607 |
| Tor1a     | -0.18292 | 0.170849 | 0.389042 |
| Folr1     | -0.63152 | 0.170648 | 0.388761 |
| Alkbh7    | -0.22955 | 0.170608 | 0.388731 |
| Zfp106    | -0.1234  | 0.17049  | 0.388638 |
| mt-Nd4l   | -0.40181 | 0.170432 | 0.388565 |
| Popdc3    | -0.73308 | 0.170182 | 0.388055 |
| Atp8a2    | -0.32649 | 0.170128 | 0.387991 |
| Cep126    | -0.32934 | 0.170085 | 0.38799  |
| Arvcf     | -0.34591 | 0.170057 | 0.38799  |
| Ext1      | -0.25455 | 0.170019 | 0.387978 |
| Ell2      | -0.29432 | 0.169912 | 0.387793 |
| Gm44187   | -1.02056 | 0.169719 | 0.387531 |
| Chtf8     | -0.53793 | 0.169671 | 0.387486 |
| Taf15     | -0.14013 | 0.16961  | 0.387458 |
| Rel       | -0.35211 | 0.16951  | 0.387348 |
| Mtrfr     | -0.30484 | 0.169494 | 0.387348 |
| B230217C  | -0.58161 | 0.169366 | 0.387177 |
| Prpf40a   | -0.11074 | 0.169221 | 0.386924 |
| C630043Fc | -0.42159 | 0.168945 | 0.386437 |
| Tysnd1    | -0.2923  | 0.168659 | 0.386052 |
| Ankmy2    | -0.21719 | 0.16836  | 0.385544 |
| 4930563E  | -17.9534 | 0.168024 | 0.385069 |
| Vps9d1    | -0.26378 | 0.168093 | 0.38511  |
| Aacs      | -0.51159 | 0.167753 | 0.384565 |
| Gm13216   | -17.917  | 0.167473 | 0.384101 |
| Lrwd1     | -0.31858 | 0.167635 | 0.384412 |
| Gm16310   | -0.82644 | 0.1672   | 0.38359  |
| Gm44044   | -0.38119 | 0.167193 | 0.38359  |
| Ccdc68    | -0.52627 | 0.167131 | 0.38359  |
| Gm11713   | -0.33669 | 0.166996 | 0.383418 |
| Dhx35     | -0.42926 | 0.16693  | 0.383324 |
| Pycrl     | -0.3278  | 0.166875 | 0.383256 |
| Tmem39a   | -0.27847 | 0.16679  | 0.383121 |
| Cngb1     | -0.13174 | 0.166612 | 0.38277  |
| Gm40309   | -0.3175  | 0.166601 | 0.38277  |
| Mtbp      | -0.42096 | 0.166474 | 0.382746 |
| Gpr62     | -0.95495 | 0.16646  | 0.382746 |
| lws1      | -0.15013 | 0.166456 | 0.382746 |
| Clasp2    | -0.14776 | 0.166293 | 0.382625 |
| Abce1     | -0.17725 | 0.166243 | 0.382568 |
| Plpp7     | -0.63874 | 0.16614  | 0.38239  |
| Usp12     | -0.18804 | 0.165946 | 0.382125 |
| Zfp639    | -0.16615 | 0.165948 | 0.382125 |
| Gm45145   | -18.5931 | 0.165717 | 0.381827 |

|           |          |          |          |
|-----------|----------|----------|----------|
| Spryd3    | -0.2403  | 0.165819 | 0.381945 |
| Cryba1    | -0.69395 | 0.16553  | 0.381573 |
| Map4k4    | -0.10623 | 0.165555 | 0.381573 |
| Gm45177   | -18.0098 | 0.165289 | 0.381077 |
| Rhbdf2    | -0.20887 | 0.165286 | 0.381077 |
| Zfp691    | -0.4561  | 0.165202 | 0.38107  |
| 1500009L1 | -0.34781 | 0.16521  | 0.38107  |
| Trub2     | -0.35252 | 0.165197 | 0.38107  |
| Osbpl3    | -0.27717 | 0.165155 | 0.38107  |
| Phrf1     | -0.1838  | 0.164768 | 0.380344 |
| Brsk1     | -0.59668 | 0.164564 | 0.379931 |
| Wdr92     | -0.31769 | 0.164433 | 0.379744 |
| Uhrf1bp1  | -0.38668 | 0.164015 | 0.378957 |
| Snrnp48   | -0.13198 | 0.163935 | 0.378829 |
| Cog6      | -0.26451 | 0.16386  | 0.378801 |
| Gm38120   | -0.47314 | 0.163531 | 0.378421 |
| Ttll12    | -0.42309 | 0.163304 | 0.378041 |
| Slc25a42  | -0.32284 | 0.163316 | 0.378041 |
| Elapor2   | -1.49849 | 0.162971 | 0.377592 |
| Ttll1     | -0.50952 | 0.163045 | 0.377648 |
| Srbd1     | -0.27718 | 0.162933 | 0.377564 |
| Flvcr2    | -0.18226 | 0.162811 | 0.377397 |
| Gm10941   | -0.97834 | 0.162618 | 0.37724  |
| Oaf       | -0.3338  | 0.16267  | 0.37724  |
| Gm9869    | -1.24021 | 0.162467 | 0.377111 |
| Ubxn2a    | -0.12758 | 0.162615 | 0.37724  |
| Septin3   | -1.0551  | 0.162465 | 0.377111 |
| Jrkl      | -0.26382 | 0.162486 | 0.377111 |
| Gm6598    | -0.75071 | 0.162331 | 0.377008 |
| Tmem237   | -0.19587 | 0.162403 | 0.377093 |
| Tspyl5    | -0.57209 | 0.162341 | 0.377008 |
| Fam124b   | -0.41897 | 0.162102 | 0.376685 |
| Gm18283   | -1.75699 | 0.161672 | 0.376214 |
| Dnm1l     | -0.15033 | 0.161827 | 0.376223 |
| C87436    | -0.21809 | 0.161725 | 0.376219 |
| Dctn5     | -0.20542 | 0.161664 | 0.376214 |
| Med12l    | -0.62767 | 0.161597 | 0.376156 |
| Mapkap1   | -0.17284 | 0.161586 | 0.376156 |
| Kidins220 | -0.14988 | 0.161374 | 0.375811 |
| Masp2     | -1.54659 | 0.161146 | 0.375496 |
| N4bp2     | -0.29705 | 0.161224 | 0.375579 |
| Zfp386    | -0.22189 | 0.16114  | 0.375496 |
| Gm43169   | -17.8343 | 0.160912 | 0.375084 |
| Gm25630   | -16.6732 | 0.160821 | 0.374989 |
| F11       | -18.8506 | 0.160763 | 0.374914 |
| Zfp93     | -0.68463 | 0.16087  | 0.375045 |
| Pak5      | -0.44418 | 0.160653 | 0.374765 |

|          |          |          |          |
|----------|----------|----------|----------|
| Neurod4  | -0.87525 | 0.160573 | 0.374646 |
| Gm29666  | -0.87225 | 0.160472 | 0.374576 |
| Cdkn1b   | -0.12269 | 0.160518 | 0.374576 |
| Socs4    | -0.1781  | 0.160501 | 0.374576 |
| Six1     | -0.38406 | 0.160442 | 0.374576 |
| Kcnj14   | -0.2067  | 0.160456 | 0.374576 |
| Ccna2    | -0.62774 | 0.160358 | 0.374524 |
| Crnkl1   | -0.20416 | 0.16035  | 0.374524 |
| Gm47252  | -17.0907 | 0.159936 | 0.374033 |
| Gm37578  | -0.49922 | 0.160076 | 0.374185 |
| Gm49422  | -17.656  | 0.159867 | 0.37393  |
| A530058N | -18.8316 | 0.159846 | 0.37393  |
| Stk24    | -0.1563  | 0.160055 | 0.374185 |
| Dtwd1    | -0.37883 | 0.160008 | 0.374142 |
| Gm6225   | -0.6345  | 0.159746 | 0.373822 |
| H2bc4    | -0.10339 | 0.159782 | 0.373849 |
| Urb1     | -0.44037 | 0.159655 | 0.373668 |
| Fbxo9    | -0.15151 | 0.159446 | 0.373238 |
| Gm49417  | -0.41112 | 0.159345 | 0.373114 |
| 7SK-197  | -0.46351 | 0.15918  | 0.372847 |
| Gm14966  | -0.7977  | 0.158897 | 0.372301 |
| Cela1    | -0.9709  | 0.158654 | 0.372022 |
| Dkk3     | -0.18983 | 0.158598 | 0.372022 |
| Med14    | -0.26335 | 0.158564 | 0.372022 |
| Egflam   | -0.19995 | 0.158535 | 0.372022 |
| Mbtd1    | -0.19747 | 0.158366 | 0.371814 |
| Cyc1     | -0.1283  | 0.158309 | 0.371738 |
| Mms19    | -0.21421 | 0.158193 | 0.371582 |
| Xntrpc   | -1.10351 | 0.158058 | 0.371323 |
| Ip6k1    | -0.13986 | 0.157956 | 0.371201 |
| Cd207    | -16.9173 | 0.157522 | 0.370589 |
| Myo1d    | -0.1727  | 0.157584 | 0.370664 |
| Eed      | -0.21079 | 0.157355 | 0.370311 |
| Atpaf2   | -0.37106 | 0.157177 | 0.369951 |
| Gm49628  | -0.5085  | 0.157125 | 0.369943 |
| Vps26a   | -0.19294 | 0.157153 | 0.369951 |
| Zzz3     | -0.14842 | 0.157088 | 0.369943 |
| Pop1     | -0.42117 | 0.157047 | 0.369936 |
| Myb      | -0.97438 | 0.156866 | 0.369684 |
| Acrbp    | -0.46717 | 0.156931 | 0.369721 |
| Lyp1a1   | -0.15605 | 0.156908 | 0.369721 |
| Atp5b    | -0.06972 | 0.156709 | 0.369489 |
| Ttll4    | -0.39368 | 0.156319 | 0.368742 |
| Wdr70    | -0.24943 | 0.156188 | 0.36855  |
| Gvin-ps7 | -0.13388 | 0.155985 | 0.368186 |
| Agpat1   | -0.2265  | 0.155752 | 0.367839 |
| Gm12743  | -1.14149 | 0.155555 | 0.367461 |

|           |          |          |          |
|-----------|----------|----------|----------|
| Exoc8     | -0.30322 | 0.155379 | 0.367102 |
| Gm44423   | -0.90173 | 0.154909 | 0.366223 |
| Commmd6   | -0.1582  | 0.154812 | 0.366169 |
| Lrrc2     | -0.5392  | 0.154326 | 0.36525  |
| Nsrp1     | -0.14395 | 0.154261 | 0.36525  |
| Mff       | -0.12389 | 0.154181 | 0.365195 |
| Gpc3      | -0.22449 | 0.153825 | 0.364622 |
| Bnip2     | -0.08681 | 0.153579 | 0.36423  |
| Zfp658    | -0.66059 | 0.153459 | 0.364003 |
| Rusc2     | -0.19342 | 0.153458 | 0.364003 |
| Snx10     | -0.18845 | 0.153447 | 0.364003 |
| Dph3      | -0.13859 | 0.153373 | 0.363972 |
| Ap1s2     | -0.14315 | 0.153316 | 0.363953 |
| Cdip1     | -0.1668  | 0.153139 | 0.363653 |
| Coa4      | -0.39473 | 0.152924 | 0.363252 |
| Gm45151   | -1.12799 | 0.152651 | 0.362718 |
| Pabpc4    | -0.40425 | 0.152698 | 0.362772 |
| Sf3b3     | -0.14251 | 0.152302 | 0.362177 |
| Gm37521   | -1.18486 | 0.152159 | 0.361952 |
| Mphosph6  | -0.20717 | 0.152125 | 0.361928 |
| 241008010 | -0.37351 | 0.151977 | 0.361691 |
| Zfp970    | -0.76516 | 0.151838 | 0.361417 |
| Kn1       | -1.34243 | 0.151589 | 0.360922 |
| Nhs12     | -0.15136 | 0.151495 | 0.360774 |
| Rbm6      | -0.14627 | 0.151476 | 0.360774 |
| Mindy2    | -0.10024 | 0.151126 | 0.360239 |
| Slc35b4   | -0.33462 | 0.151054 | 0.360173 |
| Slitrk2   | -0.6196  | 0.150918 | 0.359971 |
| Csnk1g2   | -0.12712 | 0.150804 | 0.359815 |
| BC037032  | -0.87744 | 0.150702 | 0.359629 |
| lqsec1    | -0.14926 | 0.150668 | 0.359606 |
| Gm43010   | -0.65913 | 0.150604 | 0.359517 |
| Med27     | -0.28973 | 0.150584 | 0.359517 |
| Phb       | -0.2728  | 0.150607 | 0.359517 |
| Camsap3   | -1.06772 | 0.150276 | 0.358918 |
| Thap12    | -0.15356 | 0.150284 | 0.358918 |
| 9930104LC | -0.30521 | 0.150242 | 0.358918 |
| Pdzd2     | -0.13726 | 0.150235 | 0.358918 |
| Elp3      | -0.24624 | 0.150009 | 0.358604 |
| Pole4     | -0.18386 | 0.150048 | 0.358639 |
| AU041133  | -0.43086 | 0.149881 | 0.358354 |
| Adam23    | -1.0864  | 0.149847 | 0.358331 |
| A130012E  | -0.45716 | 0.149037 | 0.356829 |
| Gpn1      | -0.27281 | 0.149045 | 0.356829 |
| Trim21    | -0.35584 | 0.148755 | 0.356403 |
| Ncoa6     | -0.18756 | 0.148614 | 0.356236 |
| Trub1     | -0.40746 | 0.148598 | 0.356236 |

|          |          |          |          |
|----------|----------|----------|----------|
| Krcc1    | -0.1319  | 0.148365 | 0.355831 |
| Lamtor1  | -0.13988 | 0.148355 | 0.355831 |
| Spef1l   | -1.73813 | 0.148151 | 0.355694 |
| Cops8    | -0.1619  | 0.148321 | 0.355831 |
| Hddc3    | -0.40434 | 0.148052 | 0.355615 |
| Ahsa1    | -0.16739 | 0.14807  | 0.355615 |
| Fbxw5    | -0.25367 | 0.147617 | 0.354811 |
| Asb13    | -0.25359 | 0.147549 | 0.354734 |
| Ttc30b   | -0.47824 | 0.14746  | 0.354682 |
| 4930594N | -0.49908 | 0.147468 | 0.354682 |
| Agk      | -0.28855 | 0.147394 | 0.354618 |
| Gm2415   | -0.53991 | 0.147251 | 0.354464 |
| A930015D | -0.39015 | 0.147124 | 0.35431  |
| Gm11696  | -0.52102 | 0.147071 | 0.354239 |
| Ubp1l    | -0.47652 | 0.147051 | 0.354239 |
| Gm42993  | -0.43991 | 0.146573 | 0.35321  |
| Dnaja4   | -0.24167 | 0.146457 | 0.352986 |
| Prune2   | -0.39991 | 0.146444 | 0.352986 |
| Ccdc92b  | -0.88216 | 0.146213 | 0.352673 |
| Cadps    | -0.57017 | 0.146232 | 0.352673 |
| Unc13a   | -0.64437 | 0.146128 | 0.352609 |
| Timm13   | -0.11105 | 0.146181 | 0.352663 |
| Ywhab    | -0.08127 | 0.146092 | 0.352609 |
| Lrrc75a  | -0.39876 | 0.145742 | 0.35183  |
| Gm49307  | -0.56592 | 0.145548 | 0.351564 |
| Zfp930   | -0.38326 | 0.145609 | 0.351564 |
| Bccip    | -0.18065 | 0.145602 | 0.351564 |
| Gm16023  | -0.82898 | 0.145387 | 0.351257 |
| Ppip5k2  | -0.30148 | 0.14531  | 0.351182 |
| Ank3     | -0.33214 | 0.145069 | 0.350659 |
| Zfp141   | -0.49499 | 0.144928 | 0.350373 |
| Gm38192  | -1.27212 | 0.144722 | 0.350044 |
| Grin2d   | -0.73917 | 0.144564 | 0.349772 |
| Zfp281   | -0.17726 | 0.144573 | 0.349772 |
| Aasdh    | -0.48011 | 0.144423 | 0.349605 |
| Rbfox2   | -0.13652 | 0.144259 | 0.349264 |
| R3hcc1   | -0.29506 | 0.144185 | 0.349141 |
| Fasn     | -0.40675 | 0.144145 | 0.3491   |
| Dock11   | -0.59578 | 0.143935 | 0.348703 |
| Gm26666  | -0.90662 | 0.14372  | 0.348409 |
| Vasn     | -0.25035 | 0.143702 | 0.348409 |
| Inpp1    | -0.17048 | 0.143636 | 0.348318 |
| Clk4     | -0.15835 | 0.143597 | 0.348279 |
| Gm43144  | -18.5279 | 0.143212 | 0.34762  |
| Gm43751  | -1.24532 | 0.143232 | 0.34762  |
| Stag2    | -0.13314 | 0.143036 | 0.347314 |
| Gm43658  | -0.80155 | 0.142881 | 0.347108 |

|           |          |          |          |
|-----------|----------|----------|----------|
| Fzd10     | -1.43146 | 0.142715 | 0.346928 |
| Pkd2l2    | -1.42485 | 0.142565 | 0.346676 |
| Arhgef10l | -0.40889 | 0.14263  | 0.346777 |
| Uchl3     | -0.2677  | 0.142475 | 0.346512 |
| 4833412K  | -0.50534 | 0.142317 | 0.346242 |
| Cbx7      | -0.21425 | 0.142369 | 0.346313 |
| Vps37a    | -0.16303 | 0.142171 | 0.345941 |
| Creg2     | -0.63222 | 0.141954 | 0.345526 |
| Sfxn3     | -0.18996 | 0.141911 | 0.345479 |
| Nedd1     | -0.30657 | 0.14164  | 0.344931 |
| Wdr36     | -0.29697 | 0.141545 | 0.344819 |
| Slc36a1   | -0.52973 | 0.141457 | 0.344767 |
| Klhdc8a   | -0.9229  | 0.141256 | 0.344331 |
| Zc3h7b    | -0.16053 | 0.141225 | 0.344313 |
| Col2a1    | -0.67289 | 0.141078 | 0.34401  |
| Gabarapl2 | -0.09045 | 0.141005 | 0.343943 |
| Gm14508   | -1.23962 | 0.140737 | 0.343515 |
| Ralgps2   | -0.221   | 0.140828 | 0.343623 |
| Usp24     | -0.20262 | 0.140688 | 0.34345  |
| Gm13722   | -17.4236 | 0.140421 | 0.342967 |
| Tor1b     | -0.1655  | 0.140537 | 0.343137 |
| Prrc2a    | -0.12343 | 0.140485 | 0.343066 |
| Evc       | -0.51038 | 0.140415 | 0.342967 |
| Mplkip    | -0.18531 | 0.140421 | 0.342967 |
| Nr3c2     | -0.27174 | 0.140361 | 0.342967 |
| Golga3    | -0.21563 | 0.13945  | 0.341375 |
| Gm16283   | -1.09174 | 0.139008 | 0.340683 |
| Snx27     | -0.17262 | 0.139075 | 0.340792 |
| Cebpz     | -0.14062 | 0.138933 | 0.340555 |
| Dach1     | -0.17523 | 0.138877 | 0.340472 |
| Samhd1    | -0.13942 | 0.138765 | 0.340309 |
| Limd1     | -0.1407  | 0.138753 | 0.340309 |
| Kcnk3     | -0.69135 | 0.138672 | 0.340226 |
| Snap25    | -0.18953 | 0.138595 | 0.340116 |
| Loxl3     | -0.48391 | 0.138495 | 0.339926 |
| Ndufa3    | -0.1062  | 0.138025 | 0.338994 |
| Gnat2     | -0.36116 | 0.137899 | 0.338797 |
| Trappc13  | -0.19103 | 0.13778  | 0.338616 |
| Zfp641    | -0.88107 | 0.137729 | 0.338563 |
| Malt1     | -0.21243 | 0.137477 | 0.338148 |
| Gm45457   | -0.26458 | 0.137283 | 0.337781 |
| Xpr1      | -0.13    | 0.137238 | 0.337746 |
| Xpo5      | -0.28022 | 0.137212 | 0.337746 |
| Fbxo5     | -0.4918  | 0.136973 | 0.337301 |
| Gm48608   | -1.59567 | 0.136867 | 0.337201 |
| Zfp72     | -0.59239 | 0.136864 | 0.337201 |
| Mmd2      | -0.40249 | 0.136682 | 0.336967 |

|         |          |          |          |
|---------|----------|----------|----------|
| Gm44646 | -1.68898 | 0.136386 | 0.336373 |
| Golm2   | -0.28028 | 0.136333 | 0.336373 |
| Nhej1   | -0.67791 | 0.136019 | 0.335776 |
| Dnm1    | -0.28954 | 0.136058 | 0.335815 |
| Kalrn   | -0.2665  | 0.136004 | 0.335776 |
| Gm53019 | -19.2492 | 0.135728 | 0.335389 |
| Gm37566 | -0.64192 | 0.135858 | 0.335544 |
| Gm49640 | -19.2121 | 0.135666 | 0.335345 |
| Trim17  | -0.55758 | 0.135805 | 0.335467 |
| Gm44027 | -1.04175 | 0.135715 | 0.335389 |
| Gulp1   | -0.18856 | 0.13564  | 0.335336 |
| Ist1    | -0.18626 | 0.135632 | 0.335336 |
| Cacna1d | -0.71452 | 0.135578 | 0.335296 |
| Hexim2  | -0.62111 | 0.135353 | 0.33496  |
| Gm38198 | -17.7156 | 0.135282 | 0.33496  |
| Gm49284 | -1.19079 | 0.135317 | 0.33496  |
| Cdk14   | -0.22466 | 0.13548  | 0.335107 |
| Pou6f1  | -0.35688 | 0.135341 | 0.33496  |
| Ppid    | -0.17094 | 0.135347 | 0.33496  |
| Fam171b | -0.25366 | 0.135287 | 0.33496  |
| Gm21781 | -0.53501 | 0.13519  | 0.334958 |
| Pea15a  | -0.09992 | 0.135196 | 0.334958 |
| Ttc9    | -0.82901 | 0.134977 | 0.334583 |
| Zfp626  | -0.33142 | 0.134977 | 0.334583 |
| Hdhd2   | -0.51489 | 0.134854 | 0.334387 |
| Rexo4   | -0.25624 | 0.134708 | 0.334223 |
| Gm4459  | -0.95467 | 0.134548 | 0.334016 |
| Kctd4   | -1.1744  | 0.134392 | 0.33374  |
| Supt20  | -0.17022 | 0.134471 | 0.33388  |
| Ipo8    | -0.21452 | 0.134217 | 0.333415 |
| Gamt    | -0.2127  | 0.13416  | 0.333331 |
| Trio    | -0.17644 | 0.13392  | 0.33298  |
| Impg2   | -0.27034 | 0.133804 | 0.332942 |
| Pabpn1l | -1.51048 | 0.133677 | 0.332809 |
| Gm10544 | -0.48289 | 0.133706 | 0.332809 |
| Borcs8  | -0.2367  | 0.133738 | 0.332833 |
| Tlcd5   | -0.25705 | 0.133525 | 0.332525 |
| Bmp2    | -0.57027 | 0.133435 | 0.33241  |
| Cmtr2   | -0.59867 | 0.133331 | 0.332263 |
| Sfpq    | -0.09654 | 0.133129 | 0.332004 |
| Sympk   | -0.20977 | 0.133082 | 0.331972 |
| Arl6ip4 | -0.16108 | 0.13276  | 0.33128  |
| Parp8   | -0.31941 | 0.132731 | 0.331263 |
| Jchain  | -0.81052 | 0.132646 | 0.331128 |
| Gm49741 | -0.7541  | 0.132601 | 0.331128 |
| Gm26632 | -0.36612 | 0.132638 | 0.331128 |
| Mex3c   | -0.21777 | 0.132349 | 0.330641 |

|          |          |          |          |
|----------|----------|----------|----------|
| Gm43848  | -0.53263 | 0.132263 | 0.330529 |
| Myo5b    | -0.77707 | 0.132215 | 0.330484 |
| Dnai4    | -0.35077 | 0.13222  | 0.330484 |
| Mrpl27   | -0.16651 | 0.132111 | 0.330376 |
| Shf      | -0.34624 | 0.131879 | 0.329873 |
| Ldah     | -0.23422 | 0.131827 | 0.329832 |
| Gm37277  | -17.7602 | 0.131505 | 0.3293   |
| Cystm1   | -0.15735 | 0.131726 | 0.329634 |
| Taf11    | -0.17925 | 0.13159  | 0.329405 |
| Cds1     | -0.2617  | 0.131466 | 0.329275 |
| 6030458C | -0.27392 | 0.131454 | 0.329275 |
| Ran      | -0.10612 | 0.13144  | 0.329275 |
| Pcdh9    | -0.56519 | 0.131411 | 0.329275 |
| Obsl1    | -0.67183 | 0.131293 | 0.329101 |
| Arhgef17 | -0.17156 | 0.131173 | 0.328854 |
| 5530601H | -0.37582 | 0.130822 | 0.328251 |
| Got1     | -0.22715 | 0.130777 | 0.328247 |
| Adamts10 | -0.21097 | 0.130802 | 0.328251 |
| Six4     | -0.62358 | 0.130662 | 0.328014 |
| Gm37612  | -0.89889 | 0.130354 | 0.327405 |
| Vars2    | -0.48941 | 0.130418 | 0.327512 |
| Ssrp1    | -0.1428  | 0.130306 | 0.32734  |
| Parp11   | -0.43771 | 0.130151 | 0.327115 |
| Egln1    | -0.12541 | 0.129996 | 0.326834 |
| Gm37459  | -19.1034 | 0.129646 | 0.326173 |
| Ankhd1   | -0.15367 | 0.129788 | 0.326367 |
| Tnfrsf21 | -0.23334 | 0.129406 | 0.325661 |
| Mns1     | -0.92263 | 0.129224 | 0.325545 |
| Arl16    | -0.35743 | 0.129293 | 0.325545 |
| Gm45885  | -1.33614 | 0.12906  | 0.325355 |
| Zfp472   | -0.34611 | 0.129083 | 0.325359 |
| A930029G | -0.86542 | 0.128794 | 0.324899 |
| Farsa    | -0.2315  | 0.12886  | 0.324907 |
| Gm4631   | -0.50973 | 0.128814 | 0.324899 |
| Gm48624  | -0.91694 | 0.12868  | 0.324789 |
| Gm43071  | -0.49267 | 0.128534 | 0.324577 |
| Pde7a    | -0.3257  | 0.128371 | 0.324283 |
| Nub1     | -0.15556 | 0.128375 | 0.324283 |
| Pla2r1   | -0.24132 | 0.128359 | 0.324283 |
| Zfp111   | -0.44123 | 0.128198 | 0.324165 |
| 4933431K | -0.78271 | 0.128015 | 0.323756 |
| Hectd3   | -0.29676 | 0.128002 | 0.323756 |
| Gm38374  | -0.74503 | 0.127954 | 0.323713 |
| Zfp597   | -0.30658 | 0.127789 | 0.323414 |
| Rcan1    | -0.27155 | 0.127793 | 0.323414 |
| Vamp1    | -0.51478 | 0.127663 | 0.323276 |
| Gm10033  | -0.29615 | 0.127641 | 0.323276 |



|           |          |          |          |
|-----------|----------|----------|----------|
| Gm26964   | -1.08845 | 0.127451 | 0.322876 |
| Gm10250   | -1.06568 | 0.127416 | 0.322876 |
| Rbm10     | -0.24405 | 0.12745  | 0.322876 |
| 2810001G  | -0.28945 | 0.127373 | 0.322842 |
| Wrn       | -0.24603 | 0.12734  | 0.322813 |
| Supt7l    | -0.33591 | 0.12715  | 0.322504 |
| 5031439G  | -0.22153 | 0.127153 | 0.322504 |
| Slc17a4   | -19.2047 | 0.126917 | 0.322177 |
| Cdk19os   | -1.87722 | 0.126862 | 0.322093 |
| Gm49542   | -18.8126 | 0.126693 | 0.321771 |
| 2510017J1 | -0.6657  | 0.126731 | 0.321813 |
| Slc35e2   | -0.34125 | 0.126656 | 0.321771 |
| Pigf      | -0.28802 | 0.126557 | 0.321613 |
| Eif2b5    | -0.20217 | 0.126548 | 0.321613 |
| Bdp1      | -0.16319 | 0.126434 | 0.32155  |
| Nap1l3    | -0.5314  | 0.126347 | 0.321438 |
| Mlx       | -0.24293 | 0.126304 | 0.321384 |
| Gm38111   | -0.64246 | 0.126036 | 0.320805 |
| Pum3      | -0.27631 | 0.126055 | 0.320805 |
| Smarca1   | -0.69024 | 0.12598  | 0.320724 |
| Borcs7    | -0.25876 | 0.125961 | 0.320724 |
| Osbp15    | -0.40898 | 0.1258   | 0.320429 |
| Ccdc177   | -0.52782 | 0.12573  | 0.320304 |
| Ice1      | -0.19094 | 0.125652 | 0.320248 |
| Gm49519   | -1.18486 | 0.125256 | 0.319424 |
| Gm26981   | -1.13489 | 0.125286 | 0.319444 |
| Entr1     | -0.21052 | 0.12514  | 0.319181 |
| Gm49783   | -0.64772 | 0.125033 | 0.318963 |
| Slc4a5    | -1.05922 | 0.12486  | 0.318685 |
| Gm37296   | -0.77891 | 0.124733 | 0.318468 |
| Rgs6      | -0.40845 | 0.124772 | 0.318516 |
| Tmem161l  | -0.30363 | 0.124634 | 0.318324 |
| Adnp2     | -0.29773 | 0.124565 | 0.318203 |
| Uhmk1     | -0.15515 | 0.124484 | 0.31819  |
| Snph      | -0.9838  | 0.124354 | 0.317991 |
| 2310022B1 | -0.16798 | 0.124355 | 0.317991 |
| Iffo2     | -0.30816 | 0.124251 | 0.317889 |
| Cep192    | -0.31181 | 0.124104 | 0.317568 |
| Kbtbd7    | -0.36804 | 0.123437 | 0.316565 |
| Wdr5      | -0.30464 | 0.123356 | 0.316411 |
| Gm38009   | -0.49922 | 0.12298  | 0.315499 |
| Dgkz      | -0.19374 | 0.12279  | 0.31512  |
| Mterf2    | -0.37751 | 0.122646 | 0.314863 |
| Pdzrn3    | -0.54924 | 0.122648 | 0.314863 |
| Prpf19    | -0.18899 | 0.122672 | 0.314871 |
| Zfp473    | -1.4092  | 0.122464 | 0.314608 |
| R3hdm1    | -0.14239 | 0.122596 | 0.314839 |

|           |          |          |          |
|-----------|----------|----------|----------|
| Gm30198   | -1.46795 | 0.122116 | 0.31409  |
| 2900026A  | -0.12281 | 0.122302 | 0.314245 |
| Mfap3l    | -0.32696 | 0.122257 | 0.314245 |
| Cldn5     | -0.06155 | 0.122288 | 0.314245 |
| Amd2      | -0.69964 | 0.122218 | 0.314245 |
| Ercc2     | -0.356   | 0.122186 | 0.314217 |
| Rimklb    | -0.75003 | 0.12199  | 0.313929 |
| Endod1    | -0.15177 | 0.122032 | 0.31393  |
| Arhgap15  | -0.89083 | 0.121888 | 0.313719 |
| Kat5      | -0.24619 | 0.121857 | 0.313695 |
| Gm13340   | -0.84715 | 0.121555 | 0.313077 |
| Map2k6    | -0.45425 | 0.121329 | 0.31255  |
| Crem      | -0.23384 | 0.121323 | 0.31255  |
| Rbm4      | -0.62502 | 0.121158 | 0.312215 |
| Col18a1   | -0.36952 | 0.120987 | 0.311829 |
| Ddx58     | -0.19047 | 0.120887 | 0.31168  |
| Fyttd1    | -0.15897 | 0.120728 | 0.311377 |
| Cask      | -0.24797 | 0.120487 | 0.310916 |
| Anapc11   | -0.13333 | 0.120125 | 0.310129 |
| Gcnt4     | -1.214   | 0.11991  | 0.309768 |
| Rnf212b   | -1.17594 | 0.119918 | 0.309768 |
| Cenpj     | -0.43851 | 0.119972 | 0.309803 |
| Nab2      | -0.29338 | 0.119973 | 0.309803 |
| Mcm9      | -0.33537 | 0.119918 | 0.309768 |
| Gm42755   | -18.1985 | 0.11974  | 0.30952  |
| Gm44675   | -19.3324 | 0.119719 | 0.30952  |
| Nsdhl     | -0.42776 | 0.119739 | 0.30952  |
| Kdm7a     | -0.16393 | 0.119443 | 0.309075 |
| Tnxb      | -0.5675  | 0.119048 | 0.308317 |
| Syt14     | -0.53815 | 0.118684 | 0.307534 |
| Atp6v1g2  | -0.63842 | 0.118645 | 0.307486 |
| Hgs       | -0.24182 | 0.118515 | 0.307257 |
| Tfdp1     | -0.3327  | 0.118295 | 0.306865 |
| Sytl1     | -2.05284 | 0.11797  | 0.306374 |
| Aspscr1   | -0.21578 | 0.118076 | 0.306543 |
| Gm37824   | -1.68194 | 0.117914 | 0.306334 |
| Zfp273    | -0.52688 | 0.117492 | 0.30556  |
| Gm43133   | -0.9498  | 0.11737  | 0.305398 |
| Erich6    | -2.31589 | 0.117246 | 0.305236 |
| Gm43061   | -0.89515 | 0.117318 | 0.305319 |
| Chic1     | -0.39576 | 0.117319 | 0.305319 |
| Eef1akmt1 | -0.36326 | 0.117183 | 0.305176 |
| Rapgef1   | -0.16714 | 0.116992 | 0.304733 |
| Gm30124   | -0.87801 | 0.116893 | 0.304664 |
| Slc25a19  | -0.33092 | 0.116905 | 0.304664 |
| Top3a     | -0.57504 | 0.116799 | 0.304495 |
| Cspg5     | -0.36969 | 0.116631 | 0.304111 |

|          |          |          |          |
|----------|----------|----------|----------|
| Guk1     | -0.13323 | 0.116259 | 0.303245 |
| Pmvk     | -0.2256  | 0.115919 | 0.302465 |
| Gm47802  | -1.13519 | 0.115665 | 0.302013 |
| Paip2b   | -0.33465 | 0.115716 | 0.302091 |
| Cks2     | -0.66722 | 0.115576 | 0.301936 |
| Ppa1     | -0.24371 | 0.11565  | 0.302013 |
| Pik3r4   | -0.27564 | 0.115599 | 0.301946 |
| Pdpn     | -0.44468 | 0.115509 | 0.301936 |
| Ptk2     | -0.14785 | 0.115524 | 0.301936 |
| Sdc2     | -0.18757 | 0.11552  | 0.301936 |
| Vps35    | -0.14605 | 0.115487 | 0.301936 |
| Gm12183  | -0.90693 | 0.115234 | 0.301516 |
| Atpsckmt | -0.36003 | 0.115304 | 0.301647 |
| AU040320 | -0.27906 | 0.11489  | 0.300879 |
| Ptpn4    | -0.28023 | 0.114911 | 0.300883 |
| Gm4951   | -0.45024 | 0.114667 | 0.300402 |
| Lyar     | -0.1542  | 0.114336 | 0.299586 |
| Nelfb    | -0.19018 | 0.113796 | 0.298276 |
| E230020A | -0.45593 | 0.113702 | 0.298133 |
| Iars2    | -0.22374 | 0.113743 | 0.29819  |
| Rbmxl1   | -0.20644 | 0.113692 | 0.298133 |
| Smim1    | -0.36637 | 0.113338 | 0.297506 |
| Exosc9   | -0.27571 | 0.113325 | 0.297506 |
| B3galnt1 | -0.4659  | 0.113249 | 0.297467 |
| Pcdha11  | -17.7989 | 0.112953 | 0.297001 |
| Cdc45    | -1.19441 | 0.113084 | 0.297137 |
| Setd1b   | -0.17271 | 0.113017 | 0.297119 |
| Kifc5b   | -1.32143 | 0.112788 | 0.296808 |
| Mad2l1   | -0.51054 | 0.112944 | 0.297001 |
| C130013H | -0.8085  | 0.1128   | 0.296808 |
| Clns1a   | -0.20846 | 0.112705 | 0.296715 |
| Gm32699  | -1.52556 | 0.112634 | 0.296622 |
| Swi5     | -0.10908 | 0.112524 | 0.296396 |
| A930005N | -2.33407 | 0.112185 | 0.295753 |
| Nrsn1    | -0.75688 | 0.112208 | 0.295753 |
| Rsrc2    | -0.10373 | 0.112222 | 0.295753 |
| Ankrd6   | -0.34044 | 0.112112 | 0.295698 |
| Gm43403  | -17.5224 | 0.111898 | 0.295267 |
| Nlgn3    | -0.84103 | 0.111994 | 0.295466 |
| Tdrkh    | -0.44357 | 0.11186  | 0.295218 |
| Npm3     | -0.28023 | 0.111834 | 0.295201 |
| Drd1     | -0.63391 | 0.111696 | 0.295044 |
| Nkd1     | -0.21201 | 0.111781 | 0.295154 |
| Gm44996  | -0.96591 | 0.111412 | 0.294505 |
| Plcxd2   | -0.42224 | 0.111387 | 0.294505 |
| Colgalt2 | -0.44604 | 0.111372 | 0.294505 |
| Akap9    | -0.12059 | 0.111277 | 0.294355 |

|           |          |          |          |
|-----------|----------|----------|----------|
| Dnajc27   | -0.3971  | 0.110912 | 0.293613 |
| D830050J1 | -0.51799 | 0.110726 | 0.293259 |
| Osbp17    | -0.35039 | 0.110658 | 0.293129 |
| Ccdc106   | -1.34202 | 0.110509 | 0.292892 |
| Gm9828    | -0.86901 | 0.110542 | 0.292927 |
| Tspan5    | -0.10566 | 0.110433 | 0.292742 |
| Pcyt1a    | -0.20238 | 0.110298 | 0.292434 |
| Syt15     | -0.35707 | 0.110131 | 0.292097 |
| Mipep     | -0.40102 | 0.110054 | 0.292001 |
| Pign      | -0.36877 | 0.110056 | 0.292001 |
| Gm41517   | -1.27171 | 0.109924 | 0.291869 |
| Baz1b     | -0.13462 | 0.109952 | 0.291869 |
| Plekhn3   | -0.3411  | 0.109941 | 0.291869 |
| Etaa1     | -0.32616 | 0.10993  | 0.291869 |
| Ids       | -0.19823 | 0.109927 | 0.291869 |
| 5930420V  | -1.38253 | 0.109767 | 0.291731 |
| Gm10120   | -0.7656  | 0.109738 | 0.291725 |
| Usp31     | -0.32014 | 0.109779 | 0.291731 |
| 2310034G  | -0.7827  | 0.109548 | 0.291454 |
| Zfp770    | -0.29542 | 0.109558 | 0.291454 |
| Cluh      | -0.32509 | 0.109452 | 0.291325 |
| Sart1     | -0.19808 | 0.10939  | 0.291214 |
| Arr3      | -0.31832 | 0.109346 | 0.291149 |
| Apela     | -0.71802 | 0.109156 | 0.290797 |
| Dis3l2    | -0.35155 | 0.109184 | 0.29082  |
| Dnd1      | -1.41353 | 0.109059 | 0.290601 |
| Gm10571   | -1.86139 | 0.108872 | 0.290299 |
| Ino80dos  | -0.70365 | 0.108834 | 0.290249 |
| Kcnt2     | -0.57192 | 0.10883  | 0.290249 |
| Mapk8     | -0.22541 | 0.108664 | 0.290004 |
| Tmem126l  | -0.28483 | 0.108642 | 0.290004 |
| Gm16536   | -0.33099 | 0.108507 | 0.28979  |
| H2az2     | -0.10378 | 0.108486 | 0.28979  |
| Gm12276   | -0.9788  | 0.10823  | 0.28931  |
| Itsn2     | -0.13012 | 0.108061 | 0.288907 |
| Gm47797   | -0.782   | 0.107905 | 0.288573 |
| Qtrt1     | -0.41101 | 0.107916 | 0.288573 |
| Mok       | -0.58944 | 0.107772 | 0.288395 |
| Ptpa      | -0.19573 | 0.107829 | 0.288442 |
| Rad54b    | -0.31653 | 0.107604 | 0.287995 |
| Zscan20   | -0.66252 | 0.107402 | 0.287558 |
| Slc35a5   | -0.30035 | 0.107293 | 0.287368 |
| Harbi1    | -0.46805 | 0.107131 | 0.287141 |
| Snx18     | -0.19347 | 0.107176 | 0.28721  |
| Exoc6     | -0.2128  | 0.106738 | 0.286393 |
| Ankef1    | -19.3991 | 0.106473 | 0.286001 |
| Gm19466   | -18.5794 | 0.106389 | 0.285919 |

|          |          |          |          |
|----------|----------|----------|----------|
| Arhgef11 | -0.29918 | 0.106551 | 0.286097 |
| Celf1    | -0.12411 | 0.106482 | 0.286001 |
| Kcnab2   | -0.48021 | 0.106181 | 0.285462 |
| Taok2    | -0.17353 | 0.10608  | 0.28528  |
| Pnpla3   | -18.0648 | 0.105847 | 0.284872 |
| Dhrs1    | -0.21742 | 0.106013 | 0.285164 |
| Mecom    | -0.10977 | 0.105869 | 0.284879 |
| Ccdc50   | -0.13964 | 0.105215 | 0.283629 |
| Eno4     | -18.4683 | 0.104788 | 0.282737 |
| Psmc13   | -0.16248 | 0.10498  | 0.283046 |
| Zfp428   | -0.46047 | 0.104889 | 0.282854 |
| Ccdc25   | -0.21504 | 0.10488  | 0.282854 |
| 9330160F | -0.77643 | 0.104785 | 0.282737 |
| Tubgcp6  | -0.41664 | 0.104808 | 0.282737 |
| Osgin2   | -0.39731 | 0.104792 | 0.282737 |
| Snx16    | -0.35144 | 0.104645 | 0.282551 |
| Chil1    | -0.88024 | 0.10446  | 0.282319 |
| Myo5a    | -0.46386 | 0.104356 | 0.282172 |
| Patz1    | -0.22671 | 0.104307 | 0.282097 |
| Mettl25  | -0.50737 | 0.104181 | 0.281858 |
| Clasp1   | -0.17626 | 0.104146 | 0.281812 |
| Gm49338  | -0.31914 | 0.104098 | 0.281733 |
| Itga6    | -0.08715 | 0.104014 | 0.281608 |
| Col4a5   | -0.38491 | 0.103979 | 0.281564 |
| Cnnm4    | -0.43554 | 0.103854 | 0.281278 |
| Gm42432  | -0.37401 | 0.103764 | 0.281135 |
| Zfp108   | -0.87088 | 0.103633 | 0.280956 |
| Trp53bp1 | -0.26718 | 0.103642 | 0.280956 |
| 4833421G | -1.1194  | 0.103428 | 0.280631 |
| Fxyd6    | -0.22434 | 0.103548 | 0.280854 |
| Impg1    | -0.34703 | 0.103325 | 0.280504 |
| Purb     | -0.08541 | 0.103196 | 0.280256 |
| Gm16794  | -0.76539 | 0.102992 | 0.279776 |
| Gm29395  | -16.9524 | 0.102241 | 0.278185 |
| Cacng4   | -0.54566 | 0.1023   | 0.278227 |
| Gm23119  | -18.8727 | 0.10205  | 0.277896 |
| Ggps1    | -0.1786  | 0.102264 | 0.278185 |
| Ddx24    | -0.1155  | 0.102183 | 0.278162 |
| Kif1c    | -0.15042 | 0.102067 | 0.277896 |
| Tceanc2  | -0.4937  | 0.101759 | 0.277258 |
| Sulf1    | -0.56447 | 0.101781 | 0.277269 |
| Herc6    | -0.29835 | 0.101717 | 0.277258 |
| Gm28693  | -1.16794 | 0.101509 | 0.276929 |
| Zfp24    | -0.20493 | 0.101636 | 0.277127 |
| Pde1a    | -0.36205 | 0.101482 | 0.276908 |
| Zc3h8    | -0.37828 | 0.101364 | 0.276635 |
| Rgs13    | -0.82031 | 0.101254 | 0.276385 |

|           |          |          |          |
|-----------|----------|----------|----------|
| Pnck      | -0.83887 | 0.101237 | 0.276385 |
| Eif3j1    | -0.16634 | 0.101151 | 0.276306 |
| Lpar1     | -0.8121  | 0.10103  | 0.276126 |
| 4930534D  | -1.89194 | 0.100819 | 0.2757   |
| Heatr3    | -0.35716 | 0.100849 | 0.275733 |
| Ppp1r14a  | -0.22983 | 0.100696 | 0.275466 |
| 6430511E: | -0.56298 | 0.100616 | 0.275347 |
| Atp5g1    | -0.12137 | 0.100587 | 0.275319 |
| Klhl13    | -0.43646 | 0.100495 | 0.275217 |
| Gm17344   | -1.39488 | 0.10034  | 0.274994 |
| Lrrc14    | -0.35483 | 0.100456 | 0.275161 |
| Atad3a    | -0.38981 | 0.100455 | 0.275161 |
| Zfp729a   | -0.34352 | 0.100273 | 0.274862 |
| Setbp1    | -0.37744 | 0.100262 | 0.274862 |
| Ulk2      | -0.22514 | 0.100219 | 0.274813 |
| Kdm5d     | -0.32018 | 0.100132 | 0.274625 |
| Pbx3      | -0.22257 | 0.099731 | 0.273776 |
| Hyls1     | -0.70898 | 0.099262 | 0.27289  |
| Gm19195   | -0.52538 | 0.09922  | 0.272872 |
| Rrm2b     | -0.19305 | 0.099158 | 0.272752 |
| Taf12     | -0.23537 | 0.098927 | 0.272216 |
| Fam90a1b  | -17.4118 | 0.098633 | 0.27165  |
| Sfxn2     | -0.47405 | 0.098648 | 0.27165  |
| Taf1d     | -0.16607 | 0.098549 | 0.271631 |
| Lama2     | -0.2447  | 0.098498 | 0.271631 |
| Gm43024   | -1.24653 | 0.098381 | 0.271363 |
| Edem3     | -0.26417 | 0.098318 | 0.271238 |
| Osbp2     | -0.20556 | 0.098271 | 0.271211 |
| Hdgfl3    | -0.18751 | 0.098221 | 0.271121 |
| Wdr90     | -0.59562 | 0.098021 | 0.270824 |
| Lats1     | -0.21745 | 0.098066 | 0.270893 |
| Ccpg1     | -0.24481 | 0.098023 | 0.270824 |
| Rps4l     | -0.18991 | 0.097814 | 0.270398 |
| Poglut2   | -0.4659  | 0.097689 | 0.27015  |
| Msantd1   | -1.62975 | 0.097528 | 0.269856 |
| Msi1      | -0.21634 | 0.097651 | 0.270097 |
| Ranbp1    | -0.13762 | 0.097601 | 0.270006 |
| Lcorl     | -0.22218 | 0.097194 | 0.269099 |
| Tenm3     | -1.34641 | 0.096894 | 0.268598 |
| Gm43526   | -19.631  | 0.09675  | 0.268298 |
| 2810405F: | -1.77163 | 0.096721 | 0.268266 |
| Fbxl18    | -0.4036  | 0.096793 | 0.268369 |
| Pot1a     | -0.29412 | 0.096619 | 0.268033 |
| B230354K: | -0.33448 | 0.096461 | 0.267645 |
| Gm47586   | -0.37979 | 0.096235 | 0.267067 |
| Snrpb2    | -0.19879 | 0.096122 | 0.266804 |
| Tent4b    | -0.19373 | 0.095938 | 0.266392 |

|           |          |          |          |
|-----------|----------|----------|----------|
| A530058N  | -0.41126 | 0.09588  | 0.266329 |
| Angptl6   | -0.5949  | 0.095803 | 0.266214 |
| Gm14769   | -1.15418 | 0.095498 | 0.265417 |
| Get3      | -0.26615 | 0.095489 | 0.265417 |
| Nmnat1    | -0.47621 | 0.095394 | 0.265227 |
| Cinp      | -0.30279 | 0.095307 | 0.265034 |
| Srgap2    | -0.12788 | 0.095289 | 0.265031 |
| Emid1     | -0.73891 | 0.095236 | 0.264933 |
| Mtx1      | -0.28491 | 0.094676 | 0.263718 |
| 4833439L1 | -0.16659 | 0.094537 | 0.26343  |
| Rmnd5a    | -0.17101 | 0.094381 | 0.263075 |
| Kcne4     | -0.38686 | 0.094189 | 0.262608 |
| Copb2     | -0.15843 | 0.094077 | 0.262512 |
| Fam78b    | -0.52955 | 0.093988 | 0.262338 |
| Lancl2    | -0.35648 | 0.093982 | 0.262338 |
| Mysm1     | -0.16247 | 0.093767 | 0.261819 |
| Ntng1     | -1.11424 | 0.09352  | 0.261325 |
| Pygo1     | -0.62471 | 0.093618 | 0.261453 |
| Btaf1     | -0.25894 | 0.093588 | 0.261418 |
| Dolpp1    | -0.42877 | 0.093565 | 0.261403 |
| Rinl      | -0.79244 | 0.093417 | 0.261234 |
| Cacna1f   | -0.35688 | 0.093473 | 0.261293 |
| Gin1      | -0.37342 | 0.09344  | 0.261248 |
| Nagk      | -0.27406 | 0.093347 | 0.261087 |
| Mtmr3     | -0.2021  | 0.093123 | 0.260606 |
| Tlcd4     | -0.6836  | 0.093037 | 0.260461 |
| Ing4      | -0.6041  | 0.092979 | 0.260404 |
| D630024D  | -1.6437  | 0.092893 | 0.260303 |
| Gm45344   | -17.5434 | 0.092775 | 0.260165 |
| Ccdc124   | -0.17655 | 0.092827 | 0.260165 |
| Kif3c     | -0.37967 | 0.092805 | 0.260165 |
| Zbtb12    | -0.44122 | 0.092821 | 0.260165 |
| Gid4      | -0.23148 | 0.092814 | 0.260165 |
| Togaram1  | -0.23765 | 0.092803 | 0.260165 |
| Crim1     | -0.12868 | 0.092715 | 0.260165 |
| Dhrs13os  | -1.07144 | 0.092558 | 0.259851 |
| Smim10l1  | -0.13198 | 0.092486 | 0.259763 |
| Marf1     | -0.15952 | 0.092335 | 0.259419 |
| Dnlz      | -0.25526 | 0.092309 | 0.259395 |
| Raxos1    | -0.89723 | 0.092007 | 0.258687 |
| Grtp1     | -0.28817 | 0.092105 | 0.25887  |
| Mef2c     | -0.09756 | 0.091897 | 0.258575 |
| Gm44130   | -1.15406 | 0.091618 | 0.258044 |
| Kat14     | -0.32644 | 0.091583 | 0.258044 |
| Fam162a   | -0.15103 | 0.091375 | 0.257543 |
| Taf13     | -0.24722 | 0.091227 | 0.257223 |
| Bend6     | -0.74194 | 0.091094 | 0.256944 |

|          |          |          |          |
|----------|----------|----------|----------|
| 2900052N | -0.42409 | 0.091147 | 0.257045 |
| Gtf3c3   | -0.31245 | 0.091032 | 0.256817 |
| Abcd2    | -0.73747 | 0.090962 | 0.256668 |
| Zfp566   | -0.51526 | 0.090564 | 0.25569  |
| Gpd1l    | -0.32684 | 0.090495 | 0.255546 |
| Dhx29    | -0.2984  | 0.090468 | 0.255546 |
| Nadsyn1  | -0.71697 | 0.090176 | 0.254882 |
| Mkrn1    | -0.21713 | 0.089981 | 0.254572 |
| Gm37895  | -18.5847 | 0.08974  | 0.254131 |
| Actn4    | -0.09101 | 0.089831 | 0.254196 |
| Prnt1    | -0.53904 | 0.089814 | 0.254196 |
| Vsx2     | -0.39478 | 0.089792 | 0.254196 |
| Lrrk2    | -0.36411 | 0.089729 | 0.254131 |
| Map4k3   | -0.17187 | 0.089561 | 0.253863 |
| Cysltr2  | -0.4016  | 0.089449 | 0.253691 |
| Gm49747  | -1.00667 | 0.089251 | 0.253273 |
| Fastkd3  | -0.5521  | 0.089204 | 0.253255 |
| Gm28792  | -18.5528 | 0.088986 | 0.252885 |
| Txndc16  | -0.34824 | 0.089108 | 0.253155 |
| Vps13d   | -0.18487 | 0.088833 | 0.252614 |
| Nol6     | -0.41401 | 0.0888   | 0.252567 |
| Lypd1    | -0.68065 | 0.088617 | 0.25219  |
| Gm45605  | -0.82417 | 0.088591 | 0.252165 |
| Lrrc4b   | -1.35226 | 0.088407 | 0.251688 |
| R3hdm2   | -0.13194 | 0.088238 | 0.251398 |
| Sf3a1    | -0.2325  | 0.088161 | 0.251275 |
| Ptprf    | -0.5613  | 0.088056 | 0.251057 |
| Mlc1     | -0.39732 | 0.088068 | 0.251057 |
| C79130   | -0.79007 | 0.087692 | 0.250269 |
| Hnrnpul2 | -0.13813 | 0.087651 | 0.250204 |
| Aplp2    | -0.07585 | 0.087623 | 0.250171 |
| Ppm1n    | -0.3752  | 0.087452 | 0.249777 |
| 9630010A | -0.47475 | 0.087355 | 0.249548 |
| Gm37240  | -1.83775 | 0.087025 | 0.24889  |
| Klhdc1   | -0.48449 | 0.087095 | 0.249044 |
| Gm37902  | -0.80107 | 0.087012 | 0.24889  |
| Zfyve16  | -0.27872 | 0.086849 | 0.248482 |
| Pcsk5    | -1.04273 | 0.08668  | 0.248141 |
| Lin7c    | -0.18872 | 0.086641 | 0.248077 |
| Tatdn1   | -0.36725 | 0.086538 | 0.247876 |
| Mis12    | -0.31365 | 0.086444 | 0.247755 |
| Gm37728  | -0.45436 | 0.086339 | 0.24759  |
| Glb1l3   | -0.57594 | 0.086197 | 0.247278 |
| 5730405O | -1.03766 | 0.086125 | 0.247119 |
| Rnf43    | -17.0498 | 0.086005 | 0.246915 |
| Gm43420  | -1.14654 | 0.0861   | 0.247094 |
| Atm      | -0.35604 | 0.086078 | 0.247079 |



|           |          |          |          |
|-----------|----------|----------|----------|
| Gm11969   | -1.25823 | 0.085871 | 0.246672 |
| Rc3h1     | -0.16401 | 0.085918 | 0.246762 |
| Gm42440   | -0.98758 | 0.085845 | 0.246647 |
| Cdc14b    | -0.39819 | 0.085495 | 0.245924 |
| Prkaca    | -0.25406 | 0.085522 | 0.245953 |
| Ccsap     | -1.08483 | 0.085381 | 0.245736 |
| Aldh1a1   | -0.4209  | 0.08542  | 0.245786 |
| Zfx       | -0.20964 | 0.085431 | 0.245786 |
| Gm37818   | -2.09295 | 0.085162 | 0.245153 |
| Gm5113    | -0.63647 | 0.084971 | 0.244745 |
| Gm38170   | -18.6802 | 0.084751 | 0.244285 |
| Appl1     | -0.18456 | 0.084871 | 0.244552 |
| 281040811 | -1.51752 | 0.08461  | 0.24394  |
| Pcare     | -0.31578 | 0.084576 | 0.243888 |
| Map1lc3a  | -0.1199  | 0.084445 | 0.243559 |
| Ift46     | -0.31511 | 0.084258 | 0.243113 |
| Scn7a     | -1.02599 | 0.083952 | 0.242463 |
| Hnrnp1l   | -0.22226 | 0.083862 | 0.242251 |
| Gm43868   | -1.69422 | 0.083594 | 0.241615 |
| Sorl1     | -0.48213 | 0.083666 | 0.241777 |
| Iqank1    | -1.4486  | 0.083502 | 0.241489 |
| Micu3     | -0.27773 | 0.083579 | 0.241615 |
| Mov10     | -0.51209 | 0.083571 | 0.241615 |
| B3gnt2    | -0.41749 | 0.083486 | 0.241489 |
| Grin2b    | -2.18286 | 0.083226 | 0.24098  |
| Smg6      | -0.18828 | 0.083301 | 0.241141 |
| Gmpr2     | -0.27224 | 0.083119 | 0.240753 |
| Gsc2      | -0.90432 | 0.083004 | 0.240562 |
| Gtf2a1    | -0.21834 | 0.083048 | 0.24064  |
| Nsun4     | -0.34635 | 0.082862 | 0.240336 |
| Pnkd      | -0.13862 | 0.082729 | 0.240043 |
| Tpi1      | -0.11887 | 0.082539 | 0.239676 |
| Nefh      | -1.14588 | 0.082245 | 0.239194 |
| Hcn1      | -0.25042 | 0.082395 | 0.23935  |
| Pcdh1     | -0.15771 | 0.082373 | 0.239335 |
| Mrm3      | -0.44361 | 0.082316 | 0.239216 |
| Snrnp200  | -0.17344 | 0.082262 | 0.239197 |
| Iglon5    | -1.98875 | 0.081911 | 0.238533 |
| Ccdc66    | -0.27373 | 0.082004 | 0.238633 |
| Gm37935   | -0.76936 | 0.081896 | 0.238533 |
| Gm43582   | -0.81642 | 0.081833 | 0.238533 |
| 2810002D  | -0.42874 | 0.081875 | 0.238533 |
| Slc6a20b  | -1.06473 | 0.081778 | 0.238533 |
| Gm26982   | -1.03438 | 0.081664 | 0.238292 |
| Prorsd1   | -0.28107 | 0.081534 | 0.238004 |
| Etl4      | -0.23559 | 0.081425 | 0.237734 |
| Traf7     | -0.21788 | 0.081286 | 0.237466 |

|           |          |          |          |
|-----------|----------|----------|----------|
| Kat6a     | -0.15051 | 0.081251 | 0.237411 |
| Irgm2     | -0.26782 | 0.08119  | 0.237279 |
| A130014A  | -0.41734 | 0.081164 | 0.237247 |
| Zfp712    | -0.61514 | 0.081129 | 0.237195 |
| Adam17    | -0.21064 | 0.08113  | 0.237195 |
| Eno1b     | -0.62533 | 0.08089  | 0.236631 |
| Unc119    | -0.11206 | 0.08086  | 0.23659  |
| Fahd1     | -0.32548 | 0.080734 | 0.236314 |
| 1110018N  | -0.595   | 0.080645 | 0.236176 |
| Slc25a40  | -0.34917 | 0.080674 | 0.236186 |
| Zbtb18    | -0.26537 | 0.080655 | 0.236176 |
| Prkca     | -0.35008 | 0.08028  | 0.235308 |
| Hcn2      | -0.37001 | 0.080233 | 0.235215 |
| Gm42559   | -0.7459  | 0.080156 | 0.235083 |
| Nat1      | -19.2491 | 0.079996 | 0.234883 |
| Dtx2      | -0.4207  | 0.080069 | 0.234986 |
| Pwwp2a    | -0.21788 | 0.080088 | 0.234986 |
| Mybbp1a   | -0.23064 | 0.080092 | 0.234986 |
| Ptges3l   | -0.95151 | 0.07999  | 0.234883 |
| Ttc7b     | -0.21603 | 0.079868 | 0.234631 |
| Cdh24     | -1.10736 | 0.07971  | 0.234443 |
| Tent4a    | -0.30489 | 0.079794 | 0.234547 |
| Gm42517   | -1.32812 | 0.079732 | 0.234443 |
| Slc38a6   | -0.36009 | 0.079734 | 0.234443 |
| Tmem204   | -0.12223 | 0.079708 | 0.234443 |
| Fads2     | -0.48742 | 0.079627 | 0.234321 |
| Afap1l2   | -0.16738 | 0.07963  | 0.234321 |
| Lrrc51    | -0.80618 | 0.079356 | 0.233744 |
| Zfand2a   | -0.37579 | 0.079296 | 0.233611 |
| A330023F  | -0.36865 | 0.078708 | 0.232154 |
| Mtx3      | -0.48976 | 0.078649 | 0.232026 |
| Prox1os   | -1.06748 | 0.078488 | 0.231776 |
| Dleu2     | -0.21863 | 0.078411 | 0.231645 |
| Atrn      | -0.26049 | 0.078202 | 0.231209 |
| Traf3ip3  | -0.49617 | 0.078139 | 0.231204 |
| Evi5l     | -0.47843 | 0.078105 | 0.231171 |
| Cdk10     | -0.39964 | 0.078112 | 0.231171 |
| Syt13     | -1.9205  | 0.077892 | 0.230746 |
| Gm6787    | -18.6476 | 0.07786  | 0.230746 |
| Pwp2      | -0.60905 | 0.077908 | 0.230749 |
| Trpv2     | -0.39347 | 0.077876 | 0.230746 |
| Mdfic2    | -18.589  | 0.077544 | 0.230062 |
| Ccdc90b   | -0.26766 | 0.077726 | 0.230483 |
| Atrx      | -0.10203 | 0.077553 | 0.230062 |
| 4930526LC | -18.2536 | 0.077259 | 0.229463 |
| Gm47477   | -1.75357 | 0.077231 | 0.229463 |
| Ttc27     | -0.5378  | 0.077274 | 0.229463 |

|           |          |          |          |
|-----------|----------|----------|----------|
| Lamtor4   | -0.16098 | 0.077336 | 0.229601 |
| Acbd5     | -0.16865 | 0.077081 | 0.229115 |
| Slc9a8    | -0.3837  | 0.076905 | 0.228637 |
| Mcm3ap    | -0.32828 | 0.07669  | 0.228091 |
| Slf2      | -0.23347 | 0.076628 | 0.227952 |
| Vps51     | -0.45134 | 0.076603 | 0.227922 |
| Fbxw8     | -0.29828 | 0.076533 | 0.227759 |
| Gm43633   | -1.53268 | 0.076221 | 0.226964 |
| Vps29     | -0.14943 | 0.076266 | 0.227053 |
| Gm36933   | -0.57259 | 0.076095 | 0.226679 |
| Eprs      | -0.15869 | 0.076023 | 0.226548 |
| Ahi1      | -0.20877 | 0.075949 | 0.22647  |
| Btbd10    | -0.27042 | 0.075921 | 0.226431 |
| Epha8     | -1.99552 | 0.075715 | 0.225863 |
| Ino80d    | -0.16364 | 0.075712 | 0.225863 |
| 4930481A  | -0.56807 | 0.07558  | 0.225654 |
| AW011738  | -0.30672 | 0.075568 | 0.225654 |
| Sf3b4     | -0.23958 | 0.075352 | 0.225093 |
| Nhp2      | -0.2845  | 0.075347 | 0.225093 |
| Mocs2     | -0.2026  | 0.075348 | 0.225093 |
| Prdm15    | -0.51571 | 0.074977 | 0.224204 |
| Lef1os1   | -0.61087 | 0.074925 | 0.224177 |
| 1810010H  | -0.53985 | 0.074813 | 0.223977 |
| Mak       | -0.28244 | 0.074741 | 0.223804 |
| Gm38315   | -18.3639 | 0.074401 | 0.223057 |
| Chmp1b    | -0.25833 | 0.074566 | 0.223414 |
| Cxxc4     | -0.37534 | 0.07449  | 0.223233 |
| Cd274     | -0.36696 | 0.074422 | 0.223071 |
| Dync2i2   | -0.68879 | 0.074316 | 0.222932 |
| Aspm      | -2.23296 | 0.073666 | 0.221339 |
| Gm43330   | -1.04221 | 0.073688 | 0.221358 |
| Metap1    | -0.30513 | 0.073719 | 0.22141  |
| Hmx1      | -0.69713 | 0.073539 | 0.221    |
| Gm27010   | -0.83095 | 0.073431 | 0.22072  |
| Smad5     | -0.17587 | 0.07343  | 0.22072  |
| Pura      | -0.10534 | 0.073397 | 0.220707 |
| Dnajc13   | -0.25181 | 0.073363 | 0.220648 |
| Med19     | -0.19525 | 0.073293 | 0.220526 |
| Ift20     | -0.1585  | 0.07303  | 0.220046 |
| Tnfsfm13  | -1.23352 | 0.072909 | 0.219847 |
| 0610030E  | -0.24202 | 0.072926 | 0.219847 |
| Gm15627   | -1.97637 | 0.072727 | 0.219475 |
| Gm36608   | -1.14236 | 0.072585 | 0.21923  |
| C130060C  | -18.0831 | 0.072412 | 0.218976 |
| Gmcl1     | -0.31892 | 0.072598 | 0.21923  |
| C230086JC | -19.3935 | 0.072369 | 0.218891 |
| Cox20     | -0.20596 | 0.07255  | 0.219176 |

|          |          |          |          |
|----------|----------|----------|----------|
| Usp11    | -0.28852 | 0.072452 | 0.219054 |
| Zfp871   | -0.16021 | 0.072332 | 0.218824 |
| Oas1b    | -0.65489 | 0.072237 | 0.21858  |
| Zbtb26   | -0.50295 | 0.071961 | 0.217788 |
| Gm37052  | -0.53066 | 0.071802 | 0.217434 |
| Itm2a    | -0.07752 | 0.071826 | 0.217434 |
| Pon2     | -0.13554 | 0.071468 | 0.216471 |
| Shprh    | -0.23051 | 0.071293 | 0.216073 |
| Dgkq     | -0.47916 | 0.071129 | 0.215749 |
| Vps45    | -0.36841 | 0.071068 | 0.215663 |
| Cavin1   | -0.09752 | 0.070961 | 0.215502 |
| Gm27017  | -1.93062 | 0.0707   | 0.215014 |
| Chuk     | -0.26014 | 0.070864 | 0.215317 |
| Ncoa3    | -0.21851 | 0.070799 | 0.215185 |
| Hmgn1    | -0.10168 | 0.070795 | 0.215185 |
| Gm45555  | -0.67811 | 0.070598 | 0.214793 |
| Slc25a36 | -0.25542 | 0.070587 | 0.214793 |
| Gm14698  | -1.03524 | 0.070346 | 0.214355 |
| Cetn2    | -0.18718 | 0.070421 | 0.214473 |
| Map6     | -0.69643 | 0.070352 | 0.214355 |
| Ap1m1    | -0.28179 | 0.070353 | 0.214355 |
| Chn1     | -0.34577 | 0.070354 | 0.214355 |
| Gm14268  | -19.6902 | 0.070106 | 0.213861 |
| Il33     | -0.36336 | 0.070298 | 0.214355 |
| Gm45632  | -1.31302 | 0.069961 | 0.213637 |
| Usp42    | -0.31873 | 0.07005  | 0.213733 |
| Gm26736  | -19.4478 | 0.069821 | 0.213339 |
| Zfp446   | -0.58807 | 0.069915 | 0.21354  |
| Srpx     | -1.56382 | 0.069695 | 0.213172 |
| Ndufaf8  | -0.19533 | 0.069838 | 0.213346 |
| Igsf9    | -0.57694 | 0.069767 | 0.213217 |
| Ddx41    | -0.32388 | 0.069732 | 0.213199 |
| Aqp4     | -0.33847 | 0.069624 | 0.213064 |
| Gm9812   | -0.97245 | 0.069597 | 0.213044 |
| Dcaf17   | -0.28872 | 0.06955  | 0.212947 |
| Cntrob   | -0.71071 | 0.069475 | 0.212758 |
| Vsnl1    | -1.94636 | 0.069219 | 0.212106 |
| Rora     | -0.16259 | 0.069268 | 0.212213 |
| Ykt6     | -0.26897 | 0.069109 | 0.211941 |
| Gm44532  | -1.45512 | 0.068929 | 0.211476 |
| Gm9905   | -1.44892 | 0.068943 | 0.211476 |
| Psph     | -0.32106 | 0.068744 | 0.211211 |
| Nrn1l    | -1.44279 | 0.068642 | 0.210985 |
| Acot11   | -0.80105 | 0.06863  | 0.210985 |
| Msh2     | -0.28993 | 0.068583 | 0.210934 |
| Fam110b  | -0.54579 | 0.068509 | 0.210793 |
| Slc1a2   | -0.23071 | 0.068271 | 0.210276 |

|           |          |          |          |
|-----------|----------|----------|----------|
| Mbd6      | -0.25531 | 0.068039 | 0.209734 |
| Gm49266   | -0.41584 | 0.067879 | 0.209543 |
| Atg16l2   | -0.56345 | 0.067681 | 0.209103 |
| Cep68     | -0.26627 | 0.067679 | 0.209103 |
| Gm49024   | -1.45961 | 0.067524 | 0.208764 |
| Golga5    | -0.27785 | 0.067414 | 0.208582 |
| Amot      | -0.28104 | 0.067241 | 0.208089 |
| Mars2     | -0.51941 | 0.067112 | 0.207733 |
| Wasf1     | -0.72436 | 0.066917 | 0.207258 |
| Gm20721   | -0.59547 | 0.066962 | 0.207352 |
| Plekhg4   | -1.60181 | 0.066623 | 0.206603 |
| Nol9      | -0.41606 | 0.0664   | 0.206041 |
| Ddrgk1    | -0.13318 | 0.066383 | 0.206031 |
| Gm46430   | -0.46315 | 0.066273 | 0.205731 |
| Rmi1      | -0.38255 | 0.066076 | 0.205291 |
| Farp1     | -0.3089  | 0.066104 | 0.205334 |
| Gm42547   | -0.55273 | 0.066045 | 0.205236 |
| Gm35554   | -19.3525 | 0.065808 | 0.204711 |
| Rpa2      | -0.39881 | 0.065952 | 0.205032 |
| Gm43260   | -0.57574 | 0.065719 | 0.204521 |
| Gm7598    | -1.33559 | 0.065503 | 0.204101 |
| A430110L  | -1.29114 | 0.06554  | 0.204101 |
| Flnb      | -0.13204 | 0.065543 | 0.204101 |
| Jmy       | -0.17407 | 0.065543 | 0.204101 |
| Tcea1-ps1 | -0.99303 | 0.065397 | 0.203898 |
| Wdr1      | -0.17033 | 0.06548  | 0.204074 |
| Mycbp2    | -0.14207 | 0.065337 | 0.203756 |
| Ccl27a    | -0.37974 | 0.065259 | 0.203554 |
| Plxna1    | -0.39258 | 0.065178 | 0.203342 |
| Gdi1      | -0.20205 | 0.065048 | 0.203024 |
| Plxnd1    | -0.20318 | 0.064844 | 0.202471 |
| Glyr1     | -0.18688 | 0.064395 | 0.201361 |
| Brd8      | -0.17136 | 0.064348 | 0.201299 |
| Mterf1b   | -1.43487 | 0.064193 | 0.201023 |
| Fam199x   | -0.30151 | 0.06431  | 0.201265 |
| Gabrr3    | -2.14502 | 0.064012 | 0.200541 |
| Ctf1      | -0.91588 | 0.06411  | 0.200807 |
| Lin9      | -0.66213 | 0.063925 | 0.200394 |
| Khynyn    | -0.2588  | 0.063948 | 0.200425 |
| Snrpc     | -0.18102 | 0.063823 | 0.200157 |
| Ppp1r1a   | -0.49068 | 0.063796 | 0.200125 |
| Hspbap1   | -0.63191 | 0.06365  | 0.199783 |
| Anapc2    | -0.23445 | 0.063512 | 0.199475 |
| Rnf44     | -0.22211 | 0.063462 | 0.199362 |
| Commd4    | -0.25658 | 0.063386 | 0.199163 |
| Extl3     | -0.15398 | 0.063344 | 0.199075 |
| Fcrl5     | -18.1691 | 0.063106 | 0.198574 |

|           |          |          |          |
|-----------|----------|----------|----------|
| Ruvbl1    | -0.27987 | 0.063298 | 0.198969 |
| Zfp385a   | -0.22829 | 0.063266 | 0.198913 |
| 8030462N  | -0.2374  | 0.06325  | 0.198904 |
| Ap3d1     | -0.21023 | 0.063186 | 0.198785 |
| Dyrk1b    | -0.44436 | 0.063002 | 0.19829  |
| Gm29488   | -0.48017 | 0.062968 | 0.198225 |
| Zfp462    | -0.2837  | 0.062741 | 0.197678 |
| Zeb2os    | -0.96556 | 0.062488 | 0.196962 |
| Neurl2    | -0.45765 | 0.062341 | 0.196583 |
| Gm43281   | -0.66232 | 0.062324 | 0.196569 |
| Gm48250   | -19.6402 | 0.062061 | 0.196028 |
| Nedd4l    | -0.2741  | 0.062226 | 0.196301 |
| Galnt7    | -0.25572 | 0.062214 | 0.196301 |
| Pfkip     | -0.18952 | 0.062189 | 0.196268 |
| Gm38169   | -1.64264 | 0.062031 | 0.195997 |
| A330009N  | -0.48115 | 0.062146 | 0.196215 |
| Crebrf    | -0.16024 | 0.062088 | 0.196073 |
| Mrpl46    | -0.287   | 0.062038 | 0.195997 |
| Arap1     | -0.53565 | 0.061852 | 0.195615 |
| 9930021JC | -0.19072 | 0.061779 | 0.195427 |
| Dtx4      | -0.49897 | 0.061682 | 0.195204 |
| Ahctf1    | -0.21905 | 0.061702 | 0.195223 |
| Tnrc18    | -0.16584 | 0.061582 | 0.194928 |
| Twist1    | -0.52221 | 0.061554 | 0.19488  |
| Arfgef2   | -0.33761 | 0.061534 | 0.19488  |
| 1810030O  | -0.30125 | 0.061547 | 0.19488  |
| Frmd5     | -0.31932 | 0.061438 | 0.19473  |
| Ptges3    | -0.12516 | 0.061401 | 0.194724 |
| Zfp41     | -0.59193 | 0.061271 | 0.194355 |
| St8sia1   | -0.40811 | 0.061186 | 0.194124 |
| Slc8a3    | -0.93615 | 0.06108  | 0.193833 |
| Fkrp      | -0.30294 | 0.060999 | 0.193779 |
| Rabl2     | -0.6351  | 0.060786 | 0.193183 |
| A630052C  | -0.68475 | 0.060719 | 0.193011 |
| Eepd1     | -0.41534 | 0.060638 | 0.192795 |
| Gm28791   | -0.55567 | 0.060541 | 0.192572 |
| Exoc7     | -0.28104 | 0.060539 | 0.192572 |
| Tns1      | -0.10221 | 0.060461 | 0.192528 |
| Pik3c2b   | -0.43307 | 0.060425 | 0.192487 |
| Naa16     | -0.31161 | 0.060383 | 0.192436 |
| Zfp142    | -0.39046 | 0.060361 | 0.192436 |
| Rangap1   | -0.25894 | 0.0603   | 0.192291 |
| Hdac7     | -0.15581 | 0.060262 | 0.192213 |
| Gm16169   | -19.8136 | 0.059981 | 0.191699 |
| 1110025N  | -0.66568 | 0.060134 | 0.191885 |
| Unc80     | -0.44324 | 0.060118 | 0.191885 |
| Eri3      | -0.34032 | 0.060131 | 0.191885 |

|          |          |          |          |
|----------|----------|----------|----------|
| B930095G | -0.56196 | 0.060118 | 0.191885 |
| Tasor    | -0.15581 | 0.060092 | 0.191885 |
| Ppp4r1   | -0.27725 | 0.059967 | 0.191699 |
| Fv1      | -1.50569 | 0.059723 | 0.191225 |
| Polr3a   | -0.41518 | 0.059881 | 0.191528 |
| Capn7    | -0.28285 | 0.05982  | 0.191372 |
| Terf1    | -0.24344 | 0.059783 | 0.191296 |
| Nbl1     | -0.20919 | 0.059772 | 0.191296 |
| Gm17634  | -1.37405 | 0.059512 | 0.190754 |
| Cplx2    | -0.42662 | 0.059593 | 0.190891 |
| Bcat1    | -0.36748 | 0.059586 | 0.190891 |
| Ifi27    | -0.13929 | 0.059564 | 0.190879 |
| Hmgcn3   | -0.23146 | 0.05948  | 0.190694 |
| Gm37292  | -1.92796 | 0.059165 | 0.189885 |
| Ube3a    | -0.13411 | 0.05929  | 0.190123 |
| Niban2   | -0.18919 | 0.059274 | 0.190123 |
| Inha     | -1.70783 | 0.059072 | 0.189722 |
| Smpd4    | -0.42851 | 0.059089 | 0.189722 |
| Il17d    | -1.3104  | 0.058786 | 0.189061 |
| Abca4    | -0.223   | 0.05887  | 0.189265 |
| Hspa4    | -0.17136 | 0.058794 | 0.189061 |
| Sirt1    | -0.26716 | 0.058672 | 0.18879  |
| Cdk5r1   | -0.76385 | 0.058238 | 0.187514 |
| Flcn     | -0.36094 | 0.058187 | 0.18739  |
| Sall3    | -2.01328 | 0.057883 | 0.18653  |
| Fam114a1 | -0.29004 | 0.057954 | 0.18672  |
| Rian     | -0.88456 | 0.057875 | 0.18653  |
| Rpa3     | -0.29101 | 0.057845 | 0.18649  |
| Arl4c    | -0.81637 | 0.057793 | 0.186362 |
| Zranb2   | -0.15826 | 0.057695 | 0.186086 |
| Ctdspl2  | -0.21492 | 0.057576 | 0.185782 |
| Tmem106b | -0.30298 | 0.057536 | 0.185693 |
| Trmt61a  | -0.68733 | 0.057367 | 0.185187 |
| Puf60    | -0.1853  | 0.057165 | 0.184613 |
| Mdga2    | -1.37085 | 0.057023 | 0.184276 |
| Osgep    | -0.22957 | 0.057103 | 0.184495 |
| Wdr25    | -1.06463 | 0.056949 | 0.184075 |
| Reep6    | -0.18481 | 0.056914 | 0.184004 |
| Txlna    | -0.24539 | 0.056846 | 0.183864 |
| Gm45762  | -0.80659 | 0.056616 | 0.183276 |
| Dhx36    | -0.17136 | 0.056708 | 0.183536 |
| Gm17066  | -0.49473 | 0.056489 | 0.182907 |
| Morc3    | -0.27429 | 0.056402 | 0.182703 |
| Herc4    | -0.25258 | 0.056395 | 0.182703 |
| Pwwp3a   | -0.24337 | 0.056179 | 0.182138 |
| Diaph3   | -0.61349 | 0.056128 | 0.182051 |
| Rbsn     | -0.2896  | 0.05614  | 0.182051 |

|           |          |          |          |
|-----------|----------|----------|----------|
| Gm26672   | -0.69593 | 0.056024 | 0.181823 |
| Astn1     | -1.57133 | 0.055846 | 0.181413 |
| Cacna1c   | -0.44703 | 0.05596  | 0.181664 |
| BC065403  | -1.30398 | 0.055802 | 0.181413 |
| Slc10a7   | -0.33218 | 0.055895 | 0.181499 |
| Synrg     | -0.19375 | 0.055897 | 0.181499 |
| Tmem14a   | -0.55518 | 0.055805 | 0.181413 |
| Slc39a2   | -1.75754 | 0.055548 | 0.180875 |
| 4933413LC | -19.9098 | 0.055529 | 0.180875 |
| Zbtb11    | -0.29781 | 0.055671 | 0.181238 |
| Gm48027   | -0.68172 | 0.055543 | 0.180875 |
| Cep89     | -0.52591 | 0.055377 | 0.180514 |
| E130304IO | -19.5692 | 0.054891 | 0.179117 |
| Gm2233    | -18.9857 | 0.054821 | 0.178974 |
| Gtf3c5    | -0.47567 | 0.054786 | 0.178939 |
| St6gal1   | -0.30571 | 0.0548   | 0.178946 |
| Morn2     | -0.41606 | 0.054718 | 0.178756 |
| Poll      | -0.6685  | 0.054614 | 0.178494 |
| Dele1     | -0.26775 | 0.05463  | 0.178507 |
| Gm8865    | -1.23399 | 0.054481 | 0.178135 |
| Fam228b   | -1.27143 | 0.054457 | 0.178096 |
| B330016D  | -0.33345 | 0.054452 | 0.178096 |
| Bhlhe23   | -18.2602 | 0.054132 | 0.177191 |
| Kctd1     | -0.45545 | 0.054311 | 0.177738 |
| Rgs22     | -18.4071 | 0.054082 | 0.177066 |
| Sema4a    | -1.37216 | 0.054049 | 0.176994 |
| Lsm4      | -0.21941 | 0.053994 | 0.176854 |
| Isl1      | -1.27742 | 0.053844 | 0.17644  |
| Zfp870    | -0.50525 | 0.053842 | 0.17644  |
| 5330439AI | -18.2507 | 0.05366  | 0.176146 |
| Tbx15     | -0.60522 | 0.053779 | 0.17638  |
| Cav2      | -0.15831 | 0.053824 | 0.17644  |
| Zfp101    | -0.41779 | 0.053764 | 0.17638  |
| Cnot10    | -0.25927 | 0.053702 | 0.176244 |
| Gm37077   | -2.06699 | 0.053499 | 0.175768 |
| Gm44862   | -19.97   | 0.053483 | 0.175768 |
| Ephx2     | -0.63182 | 0.05361  | 0.176019 |
| Gm43662   | -19.5166 | 0.053461 | 0.175768 |
| Snx11     | -0.33301 | 0.053522 | 0.175768 |
| Polr1b    | -0.70682 | 0.053494 | 0.175768 |
| Smox      | -0.21615 | 0.053512 | 0.175768 |
| Cab39l    | -0.2617  | 0.053505 | 0.175768 |
| Hmg20b    | -0.15375 | 0.053436 | 0.175755 |
| Zfp738    | -0.37226 | 0.053357 | 0.175574 |
| Taf3      | -0.21517 | 0.053327 | 0.175552 |
| Rax       | -0.28068 | 0.053292 | 0.175476 |
| Gm17875   | -19.7643 | 0.053029 | 0.174841 |



|          |          |          |          |
|----------|----------|----------|----------|
| Ctbp1    | -0.16756 | 0.053157 | 0.175107 |
| Ubac1    | -0.31352 | 0.053106 | 0.174979 |
| Dnajb5   | -0.44123 | 0.053051 | 0.174873 |
| Gm48872  | -1.3337  | 0.052856 | 0.174387 |
| Arhgef25 | -0.31981 | 0.052911 | 0.174529 |
| Dnajb14  | -0.22723 | 0.05285  | 0.174387 |
| Uchl4    | -1.55547 | 0.052682 | 0.174042 |
| Gm9013   | -2.43391 | 0.052454 | 0.17345  |
| Pi4kb    | -0.39129 | 0.052444 | 0.17345  |
| Tgfbr1   | -0.3207  | 0.052319 | 0.173186 |
| MacroD2  | -0.42278 | 0.052232 | 0.172936 |
| Gm10916  | -1.90596 | 0.051775 | 0.171763 |
| Amph     | -0.4919  | 0.051831 | 0.171914 |
| Gm8013   | -1.81377 | 0.051568 | 0.171189 |
| Rpgrip1  | -0.17553 | 0.051579 | 0.171189 |
| Tnfsf12  | -0.17714 | 0.051524 | 0.171121 |
| Zfp536   | -0.46767 | 0.051416 | 0.170839 |
| Osbp18   | -0.23038 | 0.05136  | 0.170729 |
| Mettl16  | -0.29798 | 0.051289 | 0.17057  |
| Zfp11    | -0.61713 | 0.051117 | 0.17011  |
| Mylpf    | -0.35269 | 0.051117 | 0.17011  |
| Il15     | -0.52695 | 0.051082 | 0.170068 |
| Slc5a3   | -0.39524 | 0.051049 | 0.169998 |
| Dcc      | -1.30955 | 0.050843 | 0.169475 |
| Luzp2    | -0.57468 | 0.050934 | 0.169691 |
| Mrpl38   | -0.28672 | 0.050885 | 0.169565 |
| Gm43792  | -0.52911 | 0.050847 | 0.169475 |
| Gm30382  | -18.4939 | 0.050609 | 0.168796 |
| Gm44093  | -1.11161 | 0.050518 | 0.168567 |
| Smg1     | -0.19217 | 0.050583 | 0.168747 |
| Twf2     | -0.22753 | 0.050468 | 0.168438 |
| Spr      | -0.16654 | 0.050403 | 0.168295 |
| Cplane1  | -0.31041 | 0.050392 | 0.168294 |
| Zfp109   | -1.94847 | 0.050154 | 0.167652 |
| Sh2d2a   | -18.6011 | 0.050091 | 0.167551 |
| Pou2f1   | -0.2296  | 0.05005  | 0.167453 |
| Ppp4r3a  | -0.22233 | 0.050042 | 0.167453 |
| Cacnb4   | -1.52098 | 0.049701 | 0.166655 |
| Gm14421  | -1.95938 | 0.04967  | 0.16661  |
| Myo9a    | -0.21345 | 0.049805 | 0.166866 |
| Nr2e3    | -0.19561 | 0.049676 | 0.16661  |
| 2900093K | -0.50068 | 0.049646 | 0.166586 |
| B930059L | -1.34543 | 0.04945  | 0.166149 |
| Ppip5k1  | -0.34913 | 0.049534 | 0.166303 |
| Tmtc3    | -0.32771 | 0.04954  | 0.166303 |
| Gm37621  | -0.68282 | 0.04921  | 0.165379 |
| Gm48335  | -1.72897 | 0.049142 | 0.165336 |

|           |          |          |          |
|-----------|----------|----------|----------|
| Jakmip1   | -1.30551 | 0.049137 | 0.165336 |
| Rab6b     | -0.31072 | 0.049181 | 0.165379 |
| Gm45828   | -0.33474 | 0.049172 | 0.165379 |
| Fip1l1    | -0.18887 | 0.049119 | 0.165336 |
| BC031181  | -0.16009 | 0.048941 | 0.164958 |
| Mktn3     | -0.88452 | 0.04886  | 0.164723 |
| Cand1     | -0.2602  | 0.04886  | 0.164723 |
| Sft2d1    | -0.47632 | 0.048705 | 0.164312 |
| Gpr158    | -19.8043 | 0.048459 | 0.16363  |
| Perm1     | -2.28286 | 0.048396 | 0.163488 |
| Zfp563    | -0.49807 | 0.048275 | 0.163277 |
| Efcab5    | -1.96992 | 0.048076 | 0.162739 |
| Chsy1     | -0.37023 | 0.048113 | 0.162827 |
| Rnf227    | -0.53962 | 0.047961 | 0.162425 |
| Gm48914   | -2.03383 | 0.047712 | 0.161691 |
| Zfp952    | -0.40155 | 0.047845 | 0.162068 |
| 3010001F2 | -0.33317 | 0.0478   | 0.161952 |
| Gm49154   | -1.29778 | 0.04768  | 0.161687 |
| Gm14853   | -0.95568 | 0.047644 | 0.161605 |
| Pigh      | -0.4101  | 0.047708 | 0.161691 |
| Srcap     | -0.38128 | 0.047616 | 0.161584 |
| Gm38372   | -0.60954 | 0.047537 | 0.16137  |
| Smc1a     | -0.14466 | 0.047542 | 0.16137  |
| Gm44153   | -0.99726 | 0.047296 | 0.16079  |
| lsm1      | -0.42653 | 0.047367 | 0.160994 |
| Pithd1    | -0.31319 | 0.047244 | 0.160685 |
| 2810013P1 | -0.23144 | 0.047112 | 0.160273 |
| Gm26910   | -0.80435 | 0.047045 | 0.16008  |
| B3galt1   | -0.99047 | 0.046956 | 0.159959 |
| Nucks1    | -0.12343 | 0.047019 | 0.160031 |
| Gli3      | -0.91011 | 0.046992 | 0.159975 |
| Tmem132l  | -1.29208 | 0.046823 | 0.159617 |
| 4930470G  | -2.19964 | 0.046671 | 0.159317 |
| Erg       | -0.1632  | 0.04685  | 0.159657 |
| Sp4       | -0.26385 | 0.046797 | 0.159598 |
| Oip5os1   | -0.12207 | 0.046823 | 0.159617 |
| H2bc3     | -2.08144 | 0.046495 | 0.158888 |
| Gm41793   | -19.1934 | 0.046425 | 0.158699 |
| Ager      | -0.82753 | 0.046515 | 0.158888 |
| Zscan22   | -0.58221 | 0.046525 | 0.158888 |
| Gm14326   | -0.76075 | 0.046427 | 0.158699 |
| Fbxo43    | -2.70978 | 0.04627  | 0.158337 |
| Igsf11    | -0.69598 | 0.046279 | 0.158337 |
| Pkn1      | -0.19179 | 0.04629  | 0.158339 |
| Cdkl2     | -0.8964  | 0.046171 | 0.158078 |
| Gm47158   | -18.8069 | 0.045997 | 0.157627 |
| Fam220a   | -1.23771 | 0.045977 | 0.157594 |

|          |          |          |          |
|----------|----------|----------|----------|
| Gm6916   | -19.0075 | 0.045895 | 0.157384 |
| Invs     | -0.45215 | 0.046013 | 0.157644 |
| Cdcp3    | -0.9367  | 0.045842 | 0.157298 |
| Rsu1     | -0.14574 | 0.045906 | 0.157387 |
| Ifi44    | -0.30315 | 0.045872 | 0.157341 |
| Mettl1   | -0.53616 | 0.045849 | 0.157298 |
| Atad3aos | -0.87727 | 0.045799 | 0.157268 |
| Cpsf1    | -0.34214 | 0.045753 | 0.157155 |
| Rbpj     | -0.23981 | 0.045725 | 0.157126 |
| Phtf1    | -0.37026 | 0.045646 | 0.156893 |
| Xkr6     | -0.7461  | 0.045536 | 0.156619 |
| Bloc1s1  | -0.25071 | 0.045612 | 0.156845 |
| Amigo2   | -0.91137 | 0.045526 | 0.156619 |
| Rftn2    | -0.40583 | 0.0455   | 0.156567 |
| Rmdn3    | -0.38811 | 0.045469 | 0.156534 |
| C130080G | -18.8466 | 0.045054 | 0.155533 |
| Fzd5     | -0.45881 | 0.045182 | 0.155672 |
| Ptpn21   | -0.30214 | 0.04516  | 0.155672 |
| A430019L | -0.54747 | 0.045155 | 0.155672 |
| Fam174c  | -0.58524 | 0.045112 | 0.155592 |
| Plcb1    | -0.14949 | 0.045169 | 0.155672 |
| Ppm1h    | -0.33977 | 0.045084 | 0.155592 |
| Gm47258  | -1.38371 | 0.044963 | 0.155269 |
| Emc1     | -0.27803 | 0.044967 | 0.155269 |
| Magef1   | -0.41046 | 0.044733 | 0.154648 |
| Gm38032  | -2.36258 | 0.044461 | 0.154018 |
| Tm2d3    | -0.21174 | 0.044632 | 0.15446  |
| Sf3a3    | -0.23642 | 0.044575 | 0.154343 |
| G3bp1    | -0.16009 | 0.04449  | 0.154085 |
| Ndufa5   | -0.13562 | 0.044353 | 0.153718 |
| C130083A | -1.46375 | 0.044223 | 0.153407 |
| Ttc13    | -0.45131 | 0.044299 | 0.153578 |
| Xpc      | -0.26121 | 0.044303 | 0.153578 |
| Ednra    | -0.29938 | 0.044285 | 0.153578 |
| Cdh11    | -0.45373 | 0.044145 | 0.153179 |
| Gm37531  | -0.29971 | 0.044147 | 0.153179 |
| Nid2     | -0.48012 | 0.044057 | 0.153008 |
| Agbl3    | -0.48351 | 0.043986 | 0.152832 |
| Iscu     | -0.17688 | 0.044    | 0.152848 |
| Gpx4-ps2 | -0.29508 | 0.043537 | 0.151715 |
| Cep41    | -0.69243 | 0.043307 | 0.151138 |
| Psmc5    | -0.18408 | 0.04336  | 0.15122  |
| Stk38l   | -0.31757 | 0.043349 | 0.151215 |
| Ccng1    | -0.33843 | 0.043316 | 0.151138 |
| Gcfc2    | -0.47982 | 0.043126 | 0.150581 |
| Chpf     | -0.57152 | 0.043076 | 0.150438 |
| Gm42841  | -0.70798 | 0.04304  | 0.150384 |

|          |          |          |          |
|----------|----------|----------|----------|
| Tsnax    | -0.20315 | 0.043037 | 0.150384 |
| B3glct   | -0.41496 | 0.043012 | 0.150384 |
| Rc3h2    | -0.19594 | 0.042957 | 0.150269 |
| Mast1    | -0.86391 | 0.042743 | 0.149732 |
| Sgip1    | -0.30284 | 0.042808 | 0.149887 |
| Lipg     | -2.23051 | 0.042626 | 0.149484 |
| Map1b    | -0.18172 | 0.042794 | 0.149875 |
| Tubb4a   | -0.72326 | 0.042733 | 0.149732 |
| Gm14335  | -1.36388 | 0.042633 | 0.149484 |
| Denn2b   | -0.3114  | 0.042738 | 0.149732 |
| Slc25a26 | -0.80151 | 0.042672 | 0.149588 |
| Gm29170  | -0.75717 | 0.042437 | 0.149007 |
| Gabra1   | -1.45863 | 0.04232  | 0.148769 |
| Snap91   | -0.38406 | 0.042387 | 0.148923 |
| Cct8     | -0.17672 | 0.042418 | 0.148974 |
| Fgfr1op2 | -0.19526 | 0.042393 | 0.148923 |
| Tsn      | -0.15128 | 0.042313 | 0.148769 |
| Tafa5    | -0.68401 | 0.042247 | 0.148611 |
| Asxl2    | -0.22742 | 0.042255 | 0.148611 |
| Fam184b  | -1.23317 | 0.042149 | 0.148345 |
| 2510009E | -0.23342 | 0.042173 | 0.148394 |
| Gm30698  | -2.05917 | 0.041992 | 0.147862 |
| Atp7b    | -1.47355 | 0.041932 | 0.147759 |
| Atp13a1  | -0.36924 | 0.041991 | 0.147862 |
| A330084C | -1.46674 | 0.041835 | 0.147518 |
| Kcnj8    | -0.2401  | 0.041957 | 0.147808 |
| Scrn3    | -0.40135 | 0.041902 | 0.147719 |
| Sptssb   | -1.34072 | 0.041827 | 0.147518 |
| Hspe1    | -0.1789  | 0.041816 | 0.147518 |
| Enkd1    | -0.55392 | 0.04165  | 0.146981 |
| Pola1    | -0.53753 | 0.041654 | 0.146981 |
| Dock6    | -0.19022 | 0.041502 | 0.146549 |
| Shank2   | -1.17434 | 0.041342 | 0.146141 |
| Fbxo45   | -0.36179 | 0.041347 | 0.146141 |
| Al463170 | -1.77409 | 0.04118  | 0.145709 |
| Ubxn6    | -0.23207 | 0.041273 | 0.145981 |
| Grem2    | -19.0737 | 0.041056 | 0.145356 |
| Pgpep1   | -0.41011 | 0.041186 | 0.145709 |
| Cep290   | -0.26089 | 0.041057 | 0.145356 |
| Zfp664   | -0.19549 | 0.041033 | 0.145337 |
| Zfp707   | -0.47289 | 0.040907 | 0.145031 |
| Fat3     | -1.69996 | 0.040771 | 0.144688 |
| Birc6    | -0.16187 | 0.040689 | 0.14448  |
| Prkcz    | -0.52309 | 0.040616 | 0.144305 |
| 9130019O | -0.8841  | 0.040627 | 0.144309 |
| AW554918 | -0.3644  | 0.040356 | 0.143449 |
| Cep83    | -0.33143 | 0.040342 | 0.143433 |

|           |          |          |          |
|-----------|----------|----------|----------|
| 3110056Kl | -0.31571 | 0.04027  | 0.143245 |
| Wdr73     | -0.51904 | 0.040106 | 0.142732 |
| Cyp39a1   | -0.64685 | 0.040016 | 0.142445 |
| Sphkap    | -0.72846 | 0.039904 | 0.142158 |
| Muc3a     | -0.58513 | 0.039959 | 0.142306 |
| Wtip      | -0.20737 | 0.039968 | 0.142306 |
| Itgb8     | -0.77047 | 0.039907 | 0.142158 |
| Fam221b   | -1.68746 | 0.039745 | 0.141749 |
| 9530026Pl | -0.36247 | 0.039868 | 0.142085 |
| 2700038G  | -0.68163 | 0.039834 | 0.141998 |
| Foxk2     | -0.33805 | 0.039767 | 0.141793 |
| Slc22a28  | -18.7588 | 0.039483 | 0.141017 |
| Msra      | -0.43646 | 0.039625 | 0.141455 |
| Ttf2      | -0.73165 | 0.039387 | 0.140741 |
| Psmc1     | -0.18145 | 0.039348 | 0.140693 |
| Pik3r6    | -0.32959 | 0.039334 | 0.140693 |
| Cited2    | -0.19064 | 0.039341 | 0.140693 |
| Gm14049   | -1.21941 | 0.039157 | 0.140219 |
| Zfp959    | -0.5576  | 0.039185 | 0.140285 |
| A230107N  | -2.33419 | 0.038991 | 0.139755 |
| Pigb1     | -0.40442 | 0.038999 | 0.139755 |
| Oscp1     | -0.75316 | 0.038729 | 0.138985 |
| H3c4      | -2.08557 | 0.038429 | 0.138134 |
| Rock1     | -0.12687 | 0.038574 | 0.138528 |
| Tmem74b   | -19.2294 | 0.038376 | 0.138049 |
| Senp1     | -0.29334 | 0.038548 | 0.138468 |
| A930014E  | -18.6548 | 0.038286 | 0.137859 |
| Mga       | -0.18666 | 0.038455 | 0.138167 |
| Gm14412   | -19.4808 | 0.038261 | 0.137836 |
| Chtop     | -0.19633 | 0.038326 | 0.137936 |
| Guca1b    | -0.17915 | 0.038307 | 0.1379   |
| Rbl1      | -0.472   | 0.038273 | 0.137847 |
| MIh3      | -0.37157 | 0.038187 | 0.137636 |
| Kif17     | -19.7606 | 0.038    | 0.137128 |
| Cdc37l1   | -0.17618 | 0.038175 | 0.137623 |
| Ncln      | -0.37882 | 0.038159 | 0.137623 |
| Phip      | -0.16149 | 0.038124 | 0.137539 |
| Gm48062   | -0.76085 | 0.037991 | 0.137128 |
| A930027H  | -1.89477 | 0.037938 | 0.137    |
| Odad4     | -1.45042 | 0.037836 | 0.136699 |
| Gm43545   | -1.09222 | 0.037815 | 0.136657 |
| Fmc1      | -0.22489 | 0.037858 | 0.136744 |
| Frem1     | -1.91166 | 0.037572 | 0.136007 |
| Itih5     | -0.30392 | 0.037728 | 0.136407 |
| A430035B  | -0.40269 | 0.037664 | 0.136208 |
| Cops3     | -0.2482  | 0.037658 | 0.136208 |
| Gm49706   | -0.9819  | 0.037554 | 0.135975 |

|           |          |          |          |
|-----------|----------|----------|----------|
| Cdkl5     | -0.48641 | 0.037534 | 0.135953 |
| Gpsm2     | -0.406   | 0.037377 | 0.135538 |
| Gm37850   | -2.11189 | 0.037245 | 0.13512  |
| Gm37716   | -2.3721  | 0.037021 | 0.134402 |
| Pla2g3    | -18.7517 | 0.036854 | 0.133893 |
| Gm37764   | -0.73153 | 0.036766 | 0.133674 |
| Smad3     | -0.41022 | 0.036646 | 0.133293 |
| Gm49336   | -0.34517 | 0.036634 | 0.133291 |
| Agpat3    | -0.15055 | 0.036489 | 0.132826 |
| Rbl2      | -0.31121 | 0.036482 | 0.132826 |
| Syt3      | -18.8604 | 0.036312 | 0.132375 |
| Bbip1     | -0.19598 | 0.036437 | 0.132701 |
| Ubfd1     | -0.32854 | 0.036434 | 0.132701 |
| C9orf72   | -0.45783 | 0.036234 | 0.132123 |
| Cenps     | -1.23917 | 0.036187 | 0.13201  |
| Cacna1g   | -1.03911 | 0.03615  | 0.131962 |
| Opa1      | -0.29422 | 0.036178 | 0.13201  |
| Ccn6      | -19.2803 | 0.035978 | 0.131462 |
| Abcb1a    | -0.08738 | 0.036027 | 0.131591 |
| Gm2694    | -1.56325 | 0.0359   | 0.131322 |
| Cep135    | -0.44789 | 0.035982 | 0.131462 |
| 8430406P  | -1.83149 | 0.035823 | 0.131166 |
| Gm42856   | -0.90057 | 0.035859 | 0.131236 |
| Armc1     | -0.23103 | 0.035954 | 0.131453 |
| Gucy2e    | -0.28627 | 0.03589  | 0.131318 |
| Tigar     | -0.50394 | 0.035831 | 0.131166 |
| Dgke      | -0.25115 | 0.035799 | 0.131145 |
| Fars2     | -0.47635 | 0.035769 | 0.131067 |
| Dus3l     | -0.41192 | 0.035626 | 0.130636 |
| Rab10os   | -0.35008 | 0.035455 | 0.130074 |
| Lrrc46    | -1.64648 | 0.035379 | 0.12989  |
| Gm15530   | -0.53177 | 0.035285 | 0.12964  |
| Gm44639   | -0.52291 | 0.035137 | 0.129224 |
| 4930404I0 | -18.77   | 0.034976 | 0.128695 |
| Gm42615   | -2.51726 | 0.034833 | 0.128358 |
| Dlg1      | -0.27438 | 0.034943 | 0.128604 |
| Cct6a     | -0.17095 | 0.034907 | 0.128537 |
| Ttc1      | -0.27626 | 0.034873 | 0.128441 |
| Myo9b     | -0.3972  | 0.034813 | 0.128316 |
| 9430041J1 | -2.46596 | 0.034656 | 0.127959 |
| Hjurp     | -0.5819  | 0.034765 | 0.128194 |
| Ift172    | -0.34917 | 0.034756 | 0.128194 |
| Gm37011   | -18.639  | 0.034589 | 0.127842 |
| Akain1    | -1.71482 | 0.034607 | 0.127872 |
| Srek1     | -0.20538 | 0.034735 | 0.128154 |
| Rad51     | -2.05709 | 0.03454  | 0.127822 |
| Rubcn     | -0.36407 | 0.034636 | 0.127915 |

|           |          |          |          |
|-----------|----------|----------|----------|
| 4632427E: | -0.22212 | 0.034633 | 0.127915 |
| 1700116B: | -2.04227 | 0.034491 | 0.127726 |
| Psm14     | -0.28002 | 0.03459  | 0.127842 |
| Zfp865    | -0.34613 | 0.034557 | 0.12783  |
| Cav1      | -0.19532 | 0.034561 | 0.12783  |
| Gm43588   | -1.16195 | 0.034447 | 0.127644 |
| Ankrd50   | -0.24714 | 0.034517 | 0.12779  |
| Tesc      | -0.54437 | 0.034481 | 0.127722 |
| Cend1     | -0.65763 | 0.034432 | 0.127636 |
| E330034L1 | -0.66907 | 0.034333 | 0.127364 |
| Acs13     | -0.22185 | 0.034376 | 0.127492 |
| Meig1     | -1.09127 | 0.034248 | 0.127141 |
| Gm43258   | -0.95381 | 0.034204 | 0.12704  |
| Ndufa4    | -0.0956  | 0.034242 | 0.127141 |
| Prdm11    | -0.91957 | 0.034042 | 0.126535 |
| 4632415L: | -0.30307 | 0.034095 | 0.126667 |
| Zfp60     | -0.41516 | 0.034042 | 0.126535 |
| Gm37370   | -1.52773 | 0.033924 | 0.126316 |
| Stmn1     | -0.19175 | 0.034018 | 0.126507 |
| 2310040G  | -1.06764 | 0.03394  | 0.12632  |
| BC034090  | -0.62442 | 0.033903 | 0.126268 |
| Il11ra1   | -0.29586 | 0.033948 | 0.12632  |
| Dohh      | -0.28797 | 0.033901 | 0.126268 |
| Nrxn1     | -1.89508 | 0.033718 | 0.125735 |
| Gm43609   | -0.84013 | 0.033738 | 0.125778 |
| Gm16958   | -1.22095 | 0.033615 | 0.125444 |
| Sc5d      | -0.30672 | 0.033643 | 0.125488 |
| Tia1      | -0.20662 | 0.033461 | 0.124948 |
| Rims2     | -0.32594 | 0.033421 | 0.124846 |
| Vipr2     | -1.36187 | 0.033225 | 0.124207 |
| Gm49972   | -0.62598 | 0.033105 | 0.123849 |
| Kif27     | -20.0667 | 0.032774 | 0.122779 |
| Gm29216   | -1.08029 | 0.032794 | 0.122779 |
| Gm47483   | -0.55942 | 0.032794 | 0.122779 |
| Ripor2    | -0.48718 | 0.032807 | 0.122795 |
| Garem1    | -0.6359  | 0.032778 | 0.122779 |
| Lhpp      | -0.76027 | 0.032749 | 0.122762 |
| Gm44249   | -2.60783 | 0.032604 | 0.122407 |
| Rad17     | -0.30982 | 0.032774 | 0.122779 |
| Nxt2      | -0.43902 | 0.032704 | 0.122672 |
| Upf3a     | -0.2431  | 0.032658 | 0.122544 |
| Unc13c    | -0.37742 | 0.032637 | 0.122496 |
| Ppp2r3d   | -0.39711 | 0.032596 | 0.122407 |
| Zfp979    | -0.42982 | 0.032605 | 0.122407 |
| Nars      | -0.19402 | 0.032603 | 0.122407 |
| A930040O  | -2.83116 | 0.032279 | 0.121487 |
| Gm46436   | -1.2045  | 0.032261 | 0.12148  |

|           |          |          |          |
|-----------|----------|----------|----------|
| Etv1      | -0.35398 | 0.032366 | 0.121724 |
| Kmt2e     | -0.11763 | 0.032338 | 0.121651 |
| Exosc2    | -0.47206 | 0.032269 | 0.12148  |
| Gm37953   | -1.35384 | 0.032149 | 0.121244 |
| Arhgef16  | -1.72737 | 0.032126 | 0.121185 |
| Dnajb2    | -0.28026 | 0.032219 | 0.121355 |
| Tarbp2    | -0.39696 | 0.032179 | 0.121266 |
| Dicer1    | -0.20953 | 0.032163 | 0.121265 |
| Zfp551    | -1.22577 | 0.032023 | 0.120981 |
| Ssbp2     | -0.31091 | 0.032035 | 0.120997 |
| Trmt2a    | -0.36069 | 0.032018 | 0.120981 |
| Psmc10    | -0.33816 | 0.031958 | 0.120797 |
| Acly      | -0.24149 | 0.031882 | 0.12058  |
| Tjp1      | -0.11308 | 0.031868 | 0.12058  |
| Cbx5      | -0.17651 | 0.0318   | 0.120381 |
| Ndufc1    | -0.15045 | 0.031766 | 0.120284 |
| Ksr2      | -2.32521 | 0.031432 | 0.119201 |
| Gm37051   | -19.6125 | 0.03138  | 0.119031 |
| Fgd4      | -0.51762 | 0.031476 | 0.119337 |
| Ogdhl     | -0.88283 | 0.031324 | 0.11885  |
| A830019Pi | -1.12682 | 0.031221 | 0.118551 |
| Suv39h2   | -0.76171 | 0.031261 | 0.118641 |
| Sox2ot    | -1.62041 | 0.031123 | 0.118338 |
| Gnl2      | -0.3207  | 0.031205 | 0.11852  |
| Gucy1b1   | -0.24153 | 0.031234 | 0.11857  |
| Rarres2   | -0.25522 | 0.031201 | 0.11852  |
| Psmc3     | -0.17186 | 0.031177 | 0.118474 |
| Zfp629    | -0.44691 | 0.031126 | 0.118338 |
| Dvl1      | -0.32217 | 0.031122 | 0.118338 |
| Tph2      | -1.49913 | 0.030989 | 0.117928 |
| BC005624  | -0.22381 | 0.030994 | 0.117928 |
| Mzf1      | -1.13193 | 0.030855 | 0.117489 |
| Ddx6      | -0.13155 | 0.0309   | 0.11763  |
| A230057D  | -1.42189 | 0.030635 | 0.116739 |
| Gm19667   | -0.66285 | 0.030539 | 0.116492 |
| Pik3r2    | -0.41105 | 0.03052  | 0.116449 |
| C2cd3     | -0.42751 | 0.030489 | 0.11636  |
| Ccm2      | -0.34391 | 0.030474 | 0.116335 |
| 1110019D  | -1.24049 | 0.030349 | 0.115944 |
| Ints6l    | -0.35729 | 0.030392 | 0.116049 |
| Pno1      | -0.50342 | 0.030293 | 0.115787 |
| Gm12846   | -18.6974 | 0.030126 | 0.11534  |
| Nol4      | -1.50397 | 0.030118 | 0.11534  |
| Tmem170l  | -0.37003 | 0.030238 | 0.115637 |
| Igf1      | -2.11458 | 0.030111 | 0.11534  |
| Ears2     | -0.97385 | 0.030129 | 0.11534  |
| Kcnk1     | -0.83818 | 0.030137 | 0.11534  |



|          |          |          |          |
|----------|----------|----------|----------|
| Grk3     | -0.45149 | 0.030178 | 0.115437 |
| Heatr5b  | -0.50573 | 0.030158 | 0.11539  |
| Gvin2    | -0.52204 | 0.030125 | 0.11534  |
| Gm13622  | -0.85055 | 0.030091 | 0.11534  |
| U2af2    | -0.21789 | 0.030123 | 0.11534  |
| Plch1    | -0.8368  | 0.030023 | 0.115229 |
| Fancg    | -0.93571 | 0.029996 | 0.115154 |
| Ints6    | -0.30478 | 0.030057 | 0.115268 |
| Sos2     | -0.22413 | 0.030054 | 0.115268 |
| mt-Nd6   | -0.26341 | 0.029911 | 0.114888 |
| Apip     | -0.32659 | 0.029796 | 0.114474 |
| Mab21l2  | -0.95513 | 0.029579 | 0.113785 |
| Adcy6    | -0.27572 | 0.029532 | 0.113693 |
| Galnt17  | -0.58397 | 0.029514 | 0.113655 |
| Hdac5    | -0.25036 | 0.029481 | 0.113554 |
| Ppt1     | -0.25838 | 0.029478 | 0.113554 |
| Gm47772  | -19.2523 | 0.029246 | 0.112768 |
| Meis1    | -0.59024 | 0.029356 | 0.113133 |
| Gpr179   | -1.28331 | 0.029245 | 0.112768 |
| Kcnj13   | -1.32553 | 0.029209 | 0.11274  |
| Gm47647  | -0.50294 | 0.029229 | 0.112758 |
| Gm31356  | -2.6762  | 0.029044 | 0.112336 |
| Tubb4b   | -0.16849 | 0.029164 | 0.112624 |
| Ilf3     | -0.27023 | 0.029104 | 0.112451 |
| Kcnj10   | -0.51222 | 0.029075 | 0.112412 |
| Azin1    | -0.26891 | 0.029082 | 0.112412 |
| Orc3     | -0.39599 | 0.029017 | 0.11226  |
| B020010K | -1.02263 | 0.028975 | 0.112201 |
| Adam8    | -2.26347 | 0.028848 | 0.111835 |
| Meis2    | -0.48129 | 0.028895 | 0.111982 |
| Ubr1     | -0.23137 | 0.028702 | 0.111387 |
| Rabgef1  | -0.22848 | 0.028666 | 0.111303 |
| 4930551O | -19.8416 | 0.028479 | 0.11072  |
| Ufc1     | -0.21036 | 0.028626 | 0.111175 |
| 4932438A | -0.20042 | 0.02859  | 0.111068 |
| Sct      | -2.63243 | 0.028273 | 0.110193 |
| Arhgef19 | -1.46093 | 0.028298 | 0.110218 |
| Gm45183  | -19.9648 | 0.028196 | 0.110054 |
| Sobp     | -0.4649  | 0.028277 | 0.110193 |
| Tcof1    | -0.31967 | 0.028266 | 0.110193 |
| Ubxn11   | -1.14843 | 0.028134 | 0.109924 |
| Otud1    | -0.39749 | 0.028197 | 0.110054 |
| Pkmyt1   | -1.76859 | 0.028063 | 0.109813 |
| Fktn     | -0.35655 | 0.028122 | 0.109904 |
| Samd4    | -0.44073 | 0.028088 | 0.109829 |
| Gm43597  | -0.79601 | 0.028007 | 0.10966  |
| Pak3     | -0.45609 | 0.028016 | 0.10966  |

|          |          |          |          |
|----------|----------|----------|----------|
| Tulp1    | -0.18719 | 0.028013 | 0.10966  |
| Dennd4b  | -0.67617 | 0.027887 | 0.109242 |
| Six5     | -0.54806 | 0.027886 | 0.109242 |
| Sipa1l3  | -0.40024 | 0.027799 | 0.108976 |
| Lhfpl4   | -0.83946 | 0.027751 | 0.10888  |
| Clip4    | -0.60999 | 0.027743 | 0.108876 |
| Gm11940  | -19.6705 | 0.027581 | 0.108356 |
| Obi1     | -0.58416 | 0.027642 | 0.108536 |
| 5730480H | -0.45821 | 0.027576 | 0.108356 |
| Qrfpr    | -1.2585  | 0.027483 | 0.108084 |
| Carmil2  | -18.9277 | 0.027285 | 0.107553 |
| Scn8a    | -0.80126 | 0.027298 | 0.107553 |
| Gm42727  | -0.84644 | 0.027288 | 0.107553 |
| Gm43481  | -0.6628  | 0.027298 | 0.107553 |
| Immp1l   | -0.27206 | 0.027323 | 0.107623 |
| Gnpda2   | -0.27353 | 0.027258 | 0.10751  |
| Ubn2     | -0.18448 | 0.027192 | 0.107278 |
| Rit2     | -1.32799 | 0.027032 | 0.106835 |
| Baz2b    | -0.15521 | 0.027129 | 0.107057 |
| Dut      | -0.31765 | 0.027089 | 0.106984 |
| Srsf6    | -0.22573 | 0.027037 | 0.106835 |
| Vangl1   | -0.30128 | 0.027003 | 0.106761 |
| Arhgap17 | -0.20436 | 0.027004 | 0.106761 |
| Gm33056  | -19.9245 | 0.026827 | 0.106315 |
| Chchd4   | -0.38441 | 0.026965 | 0.10672  |
| Gm11508  | -2.25881 | 0.026823 | 0.106315 |
| Htatsf1  | -0.23239 | 0.026891 | 0.106483 |
| Rps6kb2  | -0.37735 | 0.02686  | 0.10639  |
| Slc26a10 | -0.74377 | 0.026837 | 0.106325 |
| Ank2     | -0.31456 | 0.0268   | 0.106264 |
| Rorb     | -0.24839 | 0.026751 | 0.106124 |
| Zcchc10  | -0.36024 | 0.026544 | 0.105361 |
| Gm12166  | -0.45647 | 0.026417 | 0.104912 |
| Serpinc1 | -1.32989 | 0.026281 | 0.104453 |
| Nktr     | -0.16914 | 0.026403 | 0.104884 |
| Ntm      | -0.56873 | 0.026317 | 0.104569 |
| Osbpl6   | -0.73716 | 0.026159 | 0.104136 |
| Tcf12    | -0.17578 | 0.026203 | 0.104201 |
| Brix1    | -0.31399 | 0.026174 | 0.104144 |
| Hey1     | -0.26095 | 0.026182 | 0.104144 |
| Mib1     | -0.20196 | 0.026177 | 0.104144 |
| Strbp    | -0.27457 | 0.02614  | 0.104085 |
| Gulo     | -1.56411 | 0.025983 | 0.103712 |
| Patj     | -1.09931 | 0.026022 | 0.10377  |
| Exoc5    | -0.21249 | 0.026042 | 0.103781 |
| Cenpe    | -1.47241 | 0.025861 | 0.103307 |
| Ptpr     | -0.24731 | 0.025806 | 0.10314  |

|          |          |          |          |
|----------|----------|----------|----------|
| Hdac10   | -0.63942 | 0.025742 | 0.102995 |
| Zfp518a  | -0.37024 | 0.025765 | 0.103005 |
| Castor2  | -0.49012 | 0.025751 | 0.103002 |
| Slit2    | -1.30027 | 0.025651 | 0.102767 |
| Oat      | -0.24259 | 0.025741 | 0.102995 |
| As3mt    | -0.30784 | 0.025731 | 0.102995 |
| Tle2     | -0.61367 | 0.025387 | 0.101849 |
| Zfp934   | -0.70061 | 0.025256 | 0.101404 |
| Mex3b    | -0.51558 | 0.025282 | 0.10148  |
| Snhg14   | -0.56616 | 0.025225 | 0.101305 |
| Gm37204  | -0.50713 | 0.025194 | 0.10121  |
| 2010007H | -0.78328 | 0.025183 | 0.10119  |
| Gatad1   | -0.21443 | 0.025164 | 0.101142 |
| Cadm2    | -0.35547 | 0.025125 | 0.101011 |
| Deptor   | -0.68835 | 0.025071 | 0.100824 |
| Sptbn2   | -1.57308 | 0.02498  | 0.10059  |
| BC025920 | -1.02894 | 0.024975 | 0.10059  |
| Ogfrl1   | -0.26092 | 0.024993 | 0.10059  |
| Cdh6     | -1.09778 | 0.02489  | 0.100309 |
| Gm43811  | -1.39926 | 0.024782 | 0.100016 |
| Cox6b2   | -0.48799 | 0.024858 | 0.100232 |
| Lrif1    | -0.29347 | 0.024837 | 0.100178 |
| Ing5     | -0.33822 | 0.024828 | 0.10017  |
| Hapln3   | -0.78014 | 0.024678 | 0.099723 |
| Zfp532   | -0.33936 | 0.024687 | 0.099734 |
| Lrp2     | -1.42943 | 0.024457 | 0.098979 |
| Gm44571  | -19.6124 | 0.02431  | 0.098529 |
| Efhd1    | -0.5897  | 0.024417 | 0.098857 |
| Septin6  | -0.80425 | 0.02441  | 0.098855 |
| Zik1     | -1.28827 | 0.024301 | 0.098529 |
| Dhx9     | -0.2271  | 0.024386 | 0.098812 |
| 3110067C | -20.2058 | 0.024205 | 0.098236 |
| Pgap1    | -0.62418 | 0.024304 | 0.098529 |
| Nek11    | -19.7687 | 0.024154 | 0.098162 |
| Slc17a2  | -19.3963 | 0.024086 | 0.097912 |
| Ptdss2   | -0.41068 | 0.024203 | 0.098236 |
| BB218582 | -0.87414 | 0.024028 | 0.097703 |
| Gm37639  | -1.07869 | 0.024007 | 0.097644 |
| Ikzf2    | -0.63636 | 0.02393  | 0.097385 |
| Tial1    | -0.24179 | 0.02395  | 0.09744  |
| Thap2    | -0.31005 | 0.023929 | 0.097385 |
| Slc4a2   | -0.37877 | 0.023854 | 0.097127 |
| Zfp59    | -1.0962  | 0.02375  | 0.096811 |
| Gm29358  | -1.39929 | 0.023705 | 0.096653 |
| Med23    | -0.45179 | 0.023783 | 0.096892 |
| A930003A | -0.28227 | 0.023632 | 0.096409 |
| Celf2    | -0.34549 | 0.023626 | 0.096409 |

|          |          |          |          |
|----------|----------|----------|----------|
| Adamts3  | -1.33054 | 0.023509 | 0.096039 |
| Foxp4    | -0.74157 | 0.023581 | 0.096251 |
| Slfn3    | -0.62508 | 0.02352  | 0.096056 |
| Gm29427  | -20.4054 | 0.023398 | 0.095714 |
| Crygb    | -0.67636 | 0.023431 | 0.095811 |
| Ywhaq    | -0.13887 | 0.023491 | 0.095991 |
| Chrna7   | -18.5111 | 0.023333 | 0.095528 |
| Gm42826  | -0.45495 | 0.02339  | 0.095707 |
| Gm47232  | -1.76198 | 0.023302 | 0.09548  |
| Rgma     | -0.5115  | 0.02336  | 0.09561  |
| Pyurf    | -0.44051 | 0.023309 | 0.095482 |
| Rimkla   | -2.17842 | 0.023194 | 0.095166 |
| Epb41l3  | -1.00467 | 0.023248 | 0.095333 |
| Gm37254  | -0.48446 | 0.02328  | 0.095442 |
| Crot     | -0.30772 | 0.023232 | 0.095294 |
| Bet1     | -0.2626  | 0.023143 | 0.095061 |
| Aloxe3   | -1.78561 | 0.023005 | 0.0947   |
| Fam126b  | -0.30424 | 0.023121 | 0.094995 |
| Ncam1    | -0.32447 | 0.023119 | 0.094995 |
| Spon2    | -1.20224 | 0.023091 | 0.094927 |
| Cuedc2   | -0.19958 | 0.023064 | 0.094868 |
| Taf9b    | -0.40786 | 0.02304  | 0.094795 |
| Fbxo25   | -0.42792 | 0.022999 | 0.0947   |
| Rfx1     | -0.51005 | 0.022938 | 0.094505 |
| Fxyd3    | -1.85701 | 0.022772 | 0.093974 |
| Crybb1   | -1.47082 | 0.022753 | 0.093925 |
| Golga4   | -0.19247 | 0.022832 | 0.094146 |
| BC026513 | -1.76142 | 0.022669 | 0.093627 |
| 2810004N | -0.331   | 0.02278  | 0.093983 |
| Negr1    | -0.59777 | 0.022702 | 0.093738 |
| Clic6    | -2.05006 | 0.022607 | 0.093495 |
| Rrh      | -0.82012 | 0.022641 | 0.09354  |
| Hsd17b7  | -0.64506 | 0.022621 | 0.093495 |
| Oga      | -0.19831 | 0.022609 | 0.093495 |
| H4c9     | -0.57348 | 0.022587 | 0.093495 |
| 2610037D | -0.39853 | 0.022592 | 0.093495 |
| Inpp4b   | -0.26844 | 0.022475 | 0.093101 |
| Slc18b1  | -0.68269 | 0.022415 | 0.092938 |
| Gm13689  | -0.97658 | 0.022348 | 0.09279  |
| Slc35e1  | -0.43638 | 0.022398 | 0.092938 |
| Leng8    | -0.21975 | 0.022246 | 0.09239  |
| Fam155a  | -2.41449 | 0.022022 | 0.091694 |
| Angel2   | -0.24748 | 0.02215  | 0.092055 |
| Gm28424  | -1.79088 | 0.022018 | 0.091694 |
| Dzip3    | -0.59184 | 0.022099 | 0.091883 |
| Hk2      | -0.36085 | 0.022068 | 0.091779 |
| Arhgap42 | -0.28583 | 0.022045 | 0.091759 |

|           |          |          |          |
|-----------|----------|----------|----------|
| Mpdz      | -0.27676 | 0.022023 | 0.091694 |
| Gm37954   | -0.49021 | 0.021926 | 0.09139  |
| Nudt15    | -1.46133 | 0.021826 | 0.091127 |
| Pdp2      | -0.59572 | 0.02188  | 0.09125  |
| Relch     | -0.31058 | 0.021703 | 0.09074  |
| Gm43605   | -19.9807 | 0.021574 | 0.090277 |
| Gm49712   | -3.04455 | 0.021558 | 0.090257 |
| Kifap3    | -0.25911 | 0.021643 | 0.090512 |
| Oxsr1     | -0.3143  | 0.021612 | 0.09041  |
| Uqcrc1    | -0.20891 | 0.021573 | 0.090277 |
| Syne1     | -0.16606 | 0.021545 | 0.09023  |
| Guca1a    | -0.39192 | 0.021486 | 0.090007 |
| Snrpd3    | -0.21127 | 0.021485 | 0.090007 |
| Psme2     | -0.20066 | 0.021473 | 0.090002 |
| Washc2    | -0.28088 | 0.021365 | 0.089577 |
| A730006G  | -19.6188 | 0.021221 | 0.089049 |
| Flii      | -0.21112 | 0.021347 | 0.089527 |
| B230206I0 | -19.9228 | 0.021176 | 0.088882 |
| Tpo       | -19.8719 | 0.021066 | 0.088521 |
| Gm37742   | -2.11836 | 0.021053 | 0.088491 |
| Mturn     | -0.39542 | 0.021154 | 0.088819 |
| Sugp2     | -0.44871 | 0.020938 | 0.088132 |
| Gm17203   | -2.28797 | 0.020732 | 0.087336 |
| Chmp5     | -0.16907 | 0.020851 | 0.08779  |
| Smg7      | -0.27739 | 0.020786 | 0.087542 |
| Hps4      | -0.44877 | 0.020701 | 0.087231 |
| Pi4ka     | -0.34736 | 0.020682 | 0.0872   |
| Trim5     | -0.6309  | 0.020584 | 0.08686  |
| Irs1      | -0.84021 | 0.020525 | 0.08666  |
| Pdzd8     | -0.28288 | 0.020541 | 0.086705 |
| Samd11    | -0.26109 | 0.020518 | 0.086656 |
| Agt       | -1.36127 | 0.020317 | 0.085979 |
| Gm12898   | -2.34788 | 0.020277 | 0.085854 |
| Ssbp3     | -0.28604 | 0.020372 | 0.086138 |
| Arpc5l    | -0.22186 | 0.020343 | 0.086038 |
| Ythdf3    | -0.27885 | 0.020308 | 0.085962 |
| Slc25a15  | -0.81532 | 0.020215 | 0.085682 |
| Gm43457   | -0.92569 | 0.020092 | 0.085339 |
| Pspc1     | -0.35772 | 0.020146 | 0.085512 |
| Ccnjl     | -0.71976 | 0.020117 | 0.085419 |
| Pwp1      | -0.53565 | 0.019987 | 0.084988 |
| Akap7     | -0.32746 | 0.020003 | 0.085032 |
| Gsk3a     | -0.29167 | 0.019948 | 0.084872 |
| Gigyf2    | -0.23992 | 0.019935 | 0.084848 |
| Plekhg3   | -0.38571 | 0.019937 | 0.084848 |
| Ifit2     | -0.43747 | 0.019904 | 0.084755 |
| Nek9      | -0.25797 | 0.01988  | 0.084703 |

|          |          |          |          |
|----------|----------|----------|----------|
| Lrrc4c   | -0.73959 | 0.01982  | 0.08447  |
| Zfp646   | -0.33653 | 0.01982  | 0.08447  |
| Otop3    | -2.61135 | 0.019624 | 0.083868 |
| Gm15327  | -1.55052 | 0.019649 | 0.083933 |
| Msto1    | -0.5609  | 0.019657 | 0.083943 |
| Gm44678  | -20.1003 | 0.019539 | 0.08356  |
| Dock8    | -1.25384 | 0.019508 | 0.083475 |
| Fpgs     | -0.62497 | 0.019508 | 0.083475 |
| Rprd1a   | -0.34595 | 0.019494 | 0.083475 |
| Hmgcr    | -0.37478 | 0.019395 | 0.083133 |
| Erbin    | -0.21071 | 0.019343 | 0.082932 |
| Ttyh1    | -0.43834 | 0.019327 | 0.082888 |
| Gm48231  | -1.24625 | 0.019248 | 0.082666 |
| Cnpy2    | -0.22391 | 0.01928  | 0.082735 |
| Man1b1   | -0.35924 | 0.019184 | 0.082417 |
| Stk39    | -0.30871 | 0.019094 | 0.082126 |
| Rasl10b  | -0.73018 | 0.019048 | 0.082021 |
| B230307C | -0.63061 | 0.01907  | 0.082068 |
| Ascc3    | -0.29225 | 0.019009 | 0.081901 |
| Ttyh2    | -0.37979 | 0.01899  | 0.081843 |
| Gpatch3  | -1.05226 | 0.01891  | 0.081615 |
| Prdx4    | -0.26223 | 0.018981 | 0.081828 |
| Slc4a7   | -0.30063 | 0.018889 | 0.081549 |
| Spata1   | -0.52909 | 0.018877 | 0.081517 |
| Cabp4    | -0.35119 | 0.018843 | 0.081397 |
| Gtf2e1   | -0.64588 | 0.018811 | 0.081334 |
| Nacc2    | -0.29057 | 0.018826 | 0.081371 |
| Rcn3     | -0.25505 | 0.018835 | 0.081384 |
| Ankmy1   | -19.4064 | 0.018677 | 0.080911 |
| Fam184a  | -0.75497 | 0.018689 | 0.080923 |
| Dynll2   | -0.22592 | 0.018715 | 0.081007 |
| Gm10925  | -1.02862 | 0.018627 | 0.080745 |
| Gm10101  | -2.24328 | 0.018506 | 0.080426 |
| Tor1aip1 | -0.17968 | 0.018617 | 0.080745 |
| Slc30a9  | -0.27595 | 0.018603 | 0.080745 |
| Efcab2   | -0.66547 | 0.018566 | 0.080616 |
| Crbn     | -0.3427  | 0.018562 | 0.080616 |
| P2ry10b  | -0.75508 | 0.018404 | 0.080005 |
| Zfp638   | -0.19268 | 0.018313 | 0.079727 |
| Omg      | -2.17207 | 0.01817  | 0.079206 |
| Vgll4    | -0.22778 | 0.018246 | 0.079481 |
| Tubgcp3  | -0.38998 | 0.018172 | 0.079206 |
| Gm48069  | -1.17903 | 0.018042 | 0.078708 |
| Gm2396   | -19.4616 | 0.017895 | 0.07818  |
| Dock7    | -0.51379 | 0.017992 | 0.078514 |
| Mthfd2l  | -0.35464 | 0.017954 | 0.078371 |
| Gab3     | -0.90838 | 0.017883 | 0.078153 |

|           |          |          |          |
|-----------|----------|----------|----------|
| Cit       | -0.46427 | 0.017907 | 0.07821  |
| Oxr1      | -0.23871 | 0.017821 | 0.077924 |
| Gm15696   | -1.30638 | 0.01765  | 0.077289 |
| Islr      | -0.62682 | 0.017728 | 0.077586 |
| Sorcs2    | -1.92629 | 0.0176   | 0.077193 |
| Kifc2     | -0.78104 | 0.017644 | 0.077285 |
| Gm16793   | -3.36738 | 0.017523 | 0.076981 |
| Tcf20     | -0.31732 | 0.017623 | 0.077259 |
| C78859    | -18.6575 | 0.017458 | 0.076743 |
| Gm12250   | -0.8409  | 0.017557 | 0.077043 |
| Dock10    | -0.50626 | 0.017539 | 0.076987 |
| Chaserr   | -0.21755 | 0.017535 | 0.076987 |
| Erdr1     | -1.44583 | 0.017387 | 0.07654  |
| Atic      | -0.48354 | 0.017453 | 0.076743 |
| Ndufaf4   | -0.34317 | 0.017445 | 0.076728 |
| Timm21    | -0.42887 | 0.017418 | 0.076633 |
| Hnmt      | -1.65692 | 0.017308 | 0.076306 |
| Rab3a     | -0.29338 | 0.017407 | 0.076607 |
| Lcmt1     | -0.37781 | 0.017357 | 0.076453 |
| Zfp236    | -0.41088 | 0.017283 | 0.076219 |
| Crybg3    | -0.19663 | 0.017223 | 0.075977 |
| Mrpl16    | -0.41109 | 0.017184 | 0.075849 |
| Gm37880   | -19.767  | 0.017028 | 0.075314 |
| Mettl5os  | -1.81814 | 0.01701  | 0.075268 |
| Zfp692    | -0.63953 | 0.017062 | 0.075423 |
| Med20     | -0.40559 | 0.017096 | 0.075506 |
| 2610008E: | -0.3957  | 0.017007 | 0.075268 |
| Bbs10     | -1.11914 | 0.016925 | 0.075044 |
| Glp2r     | -19.6596 | 0.01686  | 0.074814 |
| B930086L  | -0.50805 | 0.016931 | 0.075044 |
| Leng1     | -0.4039  | 0.016931 | 0.075044 |
| Mir17hg   | -0.87439 | 0.016814 | 0.074702 |
| Fgd5      | -0.18554 | 0.016855 | 0.074814 |
| Hs3st3b1  | -0.55268 | 0.016796 | 0.074648 |
| Gm4247    | -19.9122 | 0.016639 | 0.074127 |
| Mrps15    | -0.32247 | 0.01674  | 0.07446  |
| Prrx1     | -0.53502 | 0.016735 | 0.07446  |
| Dennd2a   | -0.65707 | 0.016676 | 0.07422  |
| Imp4      | -0.35209 | 0.016673 | 0.07422  |
| Sec23a    | -0.37769 | 0.016654 | 0.074167 |
| Piwil2    | -20.3722 | 0.016501 | 0.073599 |
| Ppp2r1b   | -0.74178 | 0.016563 | 0.073846 |
| Atp5k     | -0.14939 | 0.016571 | 0.073861 |
| Dynlt2a2  | -0.60379 | 0.016461 | 0.073479 |
| Mier1     | -0.15057 | 0.016452 | 0.073464 |
| Gm3625    | -0.92056 | 0.016345 | 0.07303  |
| Gm30191   | -1.99792 | 0.016222 | 0.072656 |

|           |          |          |          |
|-----------|----------|----------|----------|
| Pih1d2    | -1.1637  | 0.016256 | 0.072715 |
| Al597479  | -0.48067 | 0.016258 | 0.072715 |
| Cyp4f41-p | -1.21592 | 0.016215 | 0.072656 |
| Cplx4     | -0.27017 | 0.01626  | 0.072715 |
| Cabp1     | -0.72616 | 0.016223 | 0.072656 |
| D5Ert579  | -0.27264 | 0.016237 | 0.072675 |
| Fam193b   | -0.32113 | 0.016206 | 0.072656 |
| Wdr6      | -0.445   | 0.016215 | 0.072656 |
| Lman2l    | -0.38822 | 0.016163 | 0.072516 |
| Nphp1     | -0.66378 | 0.016116 | 0.072328 |
| Svet1     | -20.506  | 0.015944 | 0.071709 |
| Hmgxb3    | -0.4613  | 0.01602  | 0.071964 |
| Btbd3     | -0.29271 | 0.016026 | 0.071969 |
| Tubb2a    | -0.25265 | 0.015997 | 0.071925 |
| Gpr180    | -0.43587 | 0.015925 | 0.071665 |
| Dusp11    | -0.16629 | 0.015935 | 0.07169  |
| Eml6      | -0.6333  | 0.015856 | 0.071432 |
| Mob3b     | -0.65807 | 0.015806 | 0.071278 |
| Ddx18     | -0.26163 | 0.015811 | 0.071283 |
| Mettl8    | -0.75001 | 0.015764 | 0.071196 |
| Gemin8    | -0.80487 | 0.015771 | 0.071205 |
| Tsc22d1   | -0.11372 | 0.015784 | 0.071223 |
| Foxp1     | -0.12774 | 0.015735 | 0.071111 |
| Cc2d2a    | -0.38284 | 0.015692 | 0.070956 |
| Anapc5    | -0.19892 | 0.015688 | 0.070956 |
| Gm44863   | -19.3162 | 0.01556  | 0.070518 |
| Gm44679   | -20.3366 | 0.015542 | 0.070486 |
| Tmpo      | -0.18389 | 0.015618 | 0.070687 |
| Katna1    | -0.4121  | 0.015607 | 0.070682 |
| Ctsk      | -1.07239 | 0.015536 | 0.070486 |
| Nsd1      | -0.1796  | 0.015589 | 0.07062  |
| Sybu      | -1.13482 | 0.015494 | 0.070339 |
| Stk38     | -0.19146 | 0.015521 | 0.070438 |
| Fam3c     | -0.21372 | 0.015486 | 0.070339 |
| Zfp35     | -0.59428 | 0.015434 | 0.07013  |
| Synpr     | -0.586   | 0.015395 | 0.070013 |
| 1700102H  | -1.76363 | 0.015251 | 0.069531 |
| Nrg4      | -19.5289 | 0.015232 | 0.069463 |
| 1500009C  | -19.8087 | 0.015224 | 0.069451 |
| Ubp1      | -0.30986 | 0.015262 | 0.069537 |
| Marchf8   | -0.36788 | 0.015117 | 0.068983 |
| Psip1     | -0.21976 | 0.015116 | 0.068983 |
| Rex1bd    | -0.20602 | 0.015061 | 0.068789 |
| Erich5    | -1.56342 | 0.014953 | 0.068403 |
| Zfp408    | -0.8317  | 0.015006 | 0.068579 |
| Ift81     | -0.43455 | 0.014948 | 0.068399 |
| Map4      | -0.15321 | 0.014808 | 0.067822 |



|           |          |          |          |
|-----------|----------|----------|----------|
| Ppfibp2   | -0.57537 | 0.014778 | 0.067725 |
| Slc6a17   | -1.3375  | 0.014682 | 0.067365 |
| Als2      | -0.68696 | 0.014705 | 0.067454 |
| Gm5844    | -2.63711 | 0.014613 | 0.067133 |
| Pls1      | -1.40614 | 0.014626 | 0.067171 |
| Dand5     | -0.50637 | 0.014657 | 0.067271 |
| Cwc27     | -0.4217  | 0.014643 | 0.067231 |
| Gm43006   | -1.13075 | 0.014346 | 0.06607  |
| Strip1    | -0.35103 | 0.014405 | 0.066278 |
| Lamtor3   | -0.29723 | 0.0144   | 0.066277 |
| Dennd6a   | -0.27109 | 0.014362 | 0.066122 |
| Cmtr1     | -0.69338 | 0.014293 | 0.065885 |
| Gm42702   | -0.63833 | 0.014252 | 0.065752 |
| Ppp1r21   | -0.39012 | 0.014236 | 0.065703 |
| Utp11     | -0.24362 | 0.014177 | 0.065453 |
| Zfp740    | -0.29957 | 0.014137 | 0.065327 |
| Zfp287    | -0.58263 | 0.014112 | 0.065251 |
| D430019H  | -19.726  | 0.014008 | 0.06491  |
| BC051226  | -0.68744 | 0.014092 | 0.0652   |
| Aldh7a1   | -0.41805 | 0.01404  | 0.064991 |
| Gm50462   | -0.92403 | 0.013914 | 0.064574 |
| Hook1     | -0.44959 | 0.013909 | 0.064574 |
| Cuedc1    | -0.23252 | 0.013918 | 0.064574 |
| Zfp213    | -0.8206  | 0.013864 | 0.064425 |
| Ckap5     | -0.24486 | 0.013861 | 0.064425 |
| Arhgap6   | -0.43421 | 0.013862 | 0.064425 |
| Oaz2      | -0.20114 | 0.013811 | 0.064258 |
| Gm48551   | -0.35692 | 0.013738 | 0.063939 |
| Utp18     | -0.41463 | 0.01372  | 0.063893 |
| Gm5069    | -0.82414 | 0.01364  | 0.063578 |
| Gm37206   | -0.88667 | 0.013621 | 0.06351  |
| Ppp3ca    | -0.16798 | 0.013614 | 0.063499 |
| Pcsk2     | -3.42225 | 0.013436 | 0.062747 |
| Syt1      | -0.34488 | 0.013476 | 0.062915 |
| Slc3a1    | -19.2958 | 0.013344 | 0.062393 |
| 9430037G  | -1.57583 | 0.013247 | 0.061998 |
| Myo1e     | -0.28783 | 0.01331  | 0.062256 |
| 5430420Fc | -1.77524 | 0.013224 | 0.061948 |
| Arhgap44  | -1.35187 | 0.01314  | 0.061616 |
| Spata5    | -0.63096 | 0.013171 | 0.06174  |
| Gm15743   | -19.8729 | 0.013036 | 0.061224 |
| Epb41l2   | -0.1665  | 0.013141 | 0.061616 |
| Mdc1      | -0.43852 | 0.013085 | 0.061396 |
| Smc2      | -0.54887 | 0.013061 | 0.061302 |
| Stxbp5    | -0.36476 | 0.013048 | 0.061258 |
| Pnmal1    | -1.83644 | 0.012943 | 0.06086  |
| Gm42874   | -19.9607 | 0.01289  | 0.060727 |

|           |          |          |          |
|-----------|----------|----------|----------|
| Gm45767   | -0.81066 | 0.012963 | 0.060935 |
| Acaa1a    | -0.42752 | 0.012974 | 0.060971 |
| Gm43760   | -19.7174 | 0.01285  | 0.060614 |
| Prcd      | -0.26158 | 0.012942 | 0.06086  |
| Cox7a1    | -0.70375 | 0.012916 | 0.060771 |
| Gm32618   | -0.83026 | 0.012872 | 0.060678 |
| Eif2ak2   | -0.30107 | 0.012901 | 0.060757 |
| Adora2b   | -1.08032 | 0.012838 | 0.060578 |
| Gm47615   | -0.75391 | 0.012861 | 0.060648 |
| Ttc26     | -1.10657 | 0.012765 | 0.060308 |
| Crabp1    | -2.4889  | 0.012719 | 0.060129 |
| Gm48996   | -0.53736 | 0.012794 | 0.060405 |
| Nol8      | -0.41651 | 0.012671 | 0.05994  |
| Sox13     | -0.25789 | 0.012466 | 0.059043 |
| Uba2      | -0.22072 | 0.012456 | 0.059018 |
| Jmjd1c    | -0.18105 | 0.01245  | 0.059009 |
| Ctbp2     | -0.22244 | 0.012429 | 0.058924 |
| Nat8l     | -1.26535 | 0.012312 | 0.058519 |
| Mrpl24    | -0.27693 | 0.01238  | 0.05875  |
| 6330418Kl | -0.88506 | 0.012245 | 0.058237 |
| Trmt1l    | -0.38591 | 0.012296 | 0.058462 |
| 4833413G  | -1.16839 | 0.012229 | 0.058199 |
| Filip1    | -0.22811 | 0.01224  | 0.058233 |
| Kif21a    | -0.39753 | 0.012182 | 0.057993 |
| Slc4a10   | -1.91455 | 0.012099 | 0.057655 |
| Ppp2r2c   | -19.6449 | 0.012043 | 0.057424 |
| Idh3b     | -0.26388 | 0.012118 | 0.057724 |
| Carmn     | -0.49406 | 0.012053 | 0.057451 |
| Steep1    | -0.31968 | 0.012028 | 0.057371 |
| Dact1     | -0.41587 | 0.012013 | 0.057336 |
| Fam185a   | -1.02936 | 0.011958 | 0.057128 |
| Map3k7cl  | -0.73842 | 0.011986 | 0.057241 |
| Cfap69    | -1.24733 | 0.011903 | 0.056902 |
| Mthfsd    | -0.65458 | 0.011927 | 0.056995 |
| Gm26852   | -20.4693 | 0.011753 | 0.056289 |
| Cdc37     | -0.19106 | 0.01185  | 0.056681 |
| Cdc42bpb  | -0.21271 | 0.011768 | 0.056325 |
| Ncoa1     | -0.24241 | 0.011731 | 0.056224 |
| Cpne2     | -0.38581 | 0.011718 | 0.056177 |
| Zfp982    | -0.72801 | 0.01169  | 0.056061 |
| Phpt1     | -0.38923 | 0.011671 | 0.056003 |
| Gm44812   | -1.81967 | 0.011574 | 0.055594 |
| Phkb      | -0.50225 | 0.011574 | 0.055594 |
| Cep120    | -0.35033 | 0.011525 | 0.055431 |
| Vstm2a    | -1.44638 | 0.011394 | 0.054889 |
| Klhl28    | -0.37135 | 0.011432 | 0.055    |
| Zup1      | -0.36355 | 0.011426 | 0.054988 |

|            |          |          |          |
|------------|----------|----------|----------|
| Rpl17-ps10 | -2.34513 | 0.011309 | 0.054617 |
| Aldh4a1    | -0.3999  | 0.011393 | 0.054889 |
| Gm10657    | -19.851  | 0.011292 | 0.054601 |
| Prpf3      | -0.48679 | 0.011375 | 0.054868 |
| Rpgr       | -0.61534 | 0.011311 | 0.054617 |
| Gm20501    | -19.5338 | 0.011219 | 0.054306 |
| Ythdc1     | -0.18513 | 0.011304 | 0.054617 |
| 4930453C   | -19.3732 | 0.011202 | 0.054259 |
| Mindy1     | -0.21733 | 0.011294 | 0.054601 |
| Zfp619     | -1.03766 | 0.011164 | 0.054128 |
| Cdc5l      | -0.23653 | 0.011181 | 0.054193 |
| Gm48677    | -2.30159 | 0.011074 | 0.053814 |
| Gm16042    | -3.0277  | 0.011071 | 0.053814 |
| Ptpn       | -0.93464 | 0.011141 | 0.054073 |
| Ddr2       | -0.48171 | 0.011149 | 0.054073 |
| Snx1       | -0.30331 | 0.011146 | 0.054073 |
| Tardbp     | -0.2267  | 0.011145 | 0.054073 |
| Gm10516    | -2.37277 | 0.01103  | 0.053654 |
| Panx2      | -20.2677 | 0.011005 | 0.053616 |
| Gm10501    | -1.41021 | 0.011021 | 0.053632 |
| Elovl4     | -0.27448 | 0.011051 | 0.053739 |
| C030013C   | -0.98456 | 0.011022 | 0.053632 |
| Mboat2     | -0.61297 | 0.011016 | 0.053632 |
| Prrc1      | -0.30372 | 0.010981 | 0.053551 |
| Gm49089    | -20.4289 | 0.010822 | 0.052861 |
| Cdc23      | -0.37436 | 0.010893 | 0.053156 |
| Tpm1       | -0.16669 | 0.01086  | 0.053015 |
| Htra1      | -0.3425  | 0.010786 | 0.052727 |
| Pex5l      | -0.35072 | 0.010736 | 0.052513 |
| Antxr1     | -0.56202 | 0.010703 | 0.0524   |
| Mlf2       | -0.19361 | 0.010688 | 0.052348 |
| Metrn      | -0.42192 | 0.010645 | 0.05215  |
| Trim44     | -0.23522 | 0.010624 | 0.052086 |
| Zdhhc14    | -0.60009 | 0.010509 | 0.051568 |
| Gm43201    | -1.01273 | 0.010452 | 0.051372 |
| Tcf24      | -1.14237 | 0.010415 | 0.051226 |
| Dock4      | -0.19868 | 0.010465 | 0.051421 |
| Usp34      | -0.19041 | 0.010441 | 0.05134  |
| Scg2       | -1.27723 | 0.010301 | 0.050781 |
| Sv2b       | -0.42371 | 0.010297 | 0.050781 |
| Gm38273    | -20.3792 | 0.010179 | 0.050312 |
| Zfp119b    | -0.84519 | 0.010198 | 0.050376 |
| Mttnr1     | -0.42475 | 0.010209 | 0.050406 |
| Fzd2       | -1.1048  | 0.010183 | 0.050318 |
| Atp5o-1    | -0.17939 | 0.010176 | 0.050312 |
| Dis3       | -0.57636 | 0.010134 | 0.050126 |
| Nbas       | -0.53297 | 0.010119 | 0.050064 |

|          |          |          |          |
|----------|----------|----------|----------|
| Gm45844  | -1.33129 | 0.010088 | 0.049946 |
| Usp48    | -0.32098 | 0.010088 | 0.049946 |
| Mark1    | -0.4635  | 0.010076 | 0.049918 |
| Angptl2  | -0.54589 | 0.010046 | 0.049786 |
| Letmd1   | -0.73216 | 0.010013 | 0.049657 |
| Drd2     | -20.4113 | 0.009889 | 0.049093 |
| Pygm     | -0.52666 | 0.009958 | 0.049402 |
| Grm8     | -1.36156 | 0.009862 | 0.04902  |
| Slc25a27 | -0.47632 | 0.009893 | 0.049095 |
| Mettl4   | -0.57346 | 0.00988  | 0.049067 |
| Bbs9     | -0.53542 | 0.009857 | 0.049015 |
| Cables2  | -0.3784  | 0.009866 | 0.049026 |
| Dzip1l   | -0.67576 | 0.009795 | 0.048731 |
| Sncb     | -0.49578 | 0.009767 | 0.048646 |
| Dcaf11   | -0.35535 | 0.009587 | 0.047843 |
| Med28    | -0.22145 | 0.009593 | 0.047845 |
| Socs7    | -0.36395 | 0.009549 | 0.04767  |
| Btbd11   | -1.49567 | 0.009418 | 0.047062 |
| Maged2   | -0.34334 | 0.009359 | 0.0468   |
| Cul2     | -0.42335 | 0.009316 | 0.046618 |
| Gm973    | -1.77932 | 0.009171 | 0.046014 |
| Cltrn    | -19.6687 | 0.009138 | 0.045881 |
| Fermt2   | -0.1418  | 0.009218 | 0.046197 |
| Specc1   | -0.44366 | 0.009183 | 0.046059 |
| Pogk     | -0.38233 | 0.00915  | 0.045924 |
| Kmt5a    | -0.3443  | 0.009126 | 0.045836 |
| Gm19265  | -3.4327  | 0.009032 | 0.045457 |
| Crebzf   | -0.30671 | 0.009059 | 0.045528 |
| Zfp367   | -0.50003 | 0.009043 | 0.045493 |
| Lrrc73   | -1.11893 | 0.008921 | 0.044987 |
| Dync2li1 | -0.7322  | 0.008919 | 0.044987 |
| Gm15799  | -2.70216 | 0.008837 | 0.044667 |
| Ccser2   | -0.18565 | 0.008828 | 0.044636 |
| Lrp1     | -0.29417 | 0.008825 | 0.044635 |
| Klhl8    | -0.70205 | 0.008791 | 0.044526 |
| H2-T24   | -0.50514 | 0.008785 | 0.044526 |
| Smc3     | -0.20176 | 0.00879  | 0.044526 |
| Tyk2     | -0.55387 | 0.00875  | 0.044392 |
| Gm37598  | -0.76056 | 0.008719 | 0.04431  |
| Upf3b    | -0.25858 | 0.008729 | 0.044346 |
| Gm26621  | -0.78121 | 0.008696 | 0.044227 |
| Gm45662  | -20.2481 | 0.00863  | 0.043979 |
| Kctd14   | -1.19062 | 0.00861  | 0.043908 |
| Prss23   | -0.23102 | 0.008688 | 0.0442   |
| Mafb     | -0.63117 | 0.00865  | 0.044065 |
| Hspa4l   | -0.28923 | 0.008663 | 0.044104 |
| Cla1     | -19.852  | 0.008571 | 0.043724 |

|          |          |          |          |
|----------|----------|----------|----------|
| Dock3    | -2.4456  | 0.008542 | 0.043589 |
| 1700102P | -2.05803 | 0.008537 | 0.04358  |
| Shd      | -1.65397 | 0.008506 | 0.043464 |
| A930009A | -20.3608 | 0.008475 | 0.043367 |
| Dym      | -0.45695 | 0.00848  | 0.043377 |
| Slc39a9  | -0.41682 | 0.008475 | 0.043367 |
| Map9     | -0.78393 | 0.00846  | 0.043333 |
| Nrip2    | -0.8412  | 0.008434 | 0.043231 |
| Aktip    | -0.3037  | 0.008447 | 0.043283 |
| Gm37602  | -20.5948 | 0.008345 | 0.042831 |
| Mfsd4a   | -0.43592 | 0.00841  | 0.04312  |
| Tfdp2    | -0.3006  | 0.008375 | 0.042954 |
| Rpusd2   | -1.64067 | 0.008301 | 0.04265  |
| Hpd1     | -20.2624 | 0.008274 | 0.042542 |
| Elof1    | -0.29502 | 0.008273 | 0.042542 |
| Gm45041  | -19.3374 | 0.008186 | 0.042191 |
| Gm37652  | -0.72761 | 0.008216 | 0.042315 |
| Isoc1    | -0.33886 | 0.00825  | 0.042446 |
| Gucy1a2  | -0.58368 | 0.008182 | 0.042185 |
| Srp14    | -0.167   | 0.008165 | 0.042108 |
| Ndufs6   | -0.19044 | 0.008159 | 0.042094 |
| Pde6h    | -0.4329  | 0.008137 | 0.042008 |
| Gm11342  | -0.92289 | 0.008094 | 0.041814 |
| Zfp365   | -0.63807 | 0.008113 | 0.041898 |
| Gm13620  | -1.78044 | 0.008056 | 0.041647 |
| Efcab12  | -3.26679 | 0.007992 | 0.041375 |
| 4732440D | -0.64033 | 0.008055 | 0.041647 |
| Slc25a38 | -0.77443 | 0.008038 | 0.041584 |
| Srpk2    | -0.23481 | 0.008037 | 0.041584 |
| Gm37606  | -0.89496 | 0.007983 | 0.041345 |
| Gm42853  | -19.8657 | 0.007926 | 0.041164 |
| Daam1    | -0.28483 | 0.00797  | 0.041305 |
| Kifbp    | -0.35632 | 0.00797  | 0.041305 |
| Col1a2   | -0.62069 | 0.007933 | 0.041185 |
| Dhx58os  | -0.94847 | 0.007877 | 0.040935 |
| Rps6kc1  | -0.66947 | 0.007844 | 0.040791 |
| Dstyk    | -0.31437 | 0.007829 | 0.04074  |
| Rundc3a  | -0.85566 | 0.007771 | 0.040491 |
| Rnf5     | -0.3868  | 0.007806 | 0.040637 |
| Casd1    | -0.32666 | 0.007792 | 0.040579 |
| Tro      | -2.15117 | 0.007706 | 0.040244 |
| Gm37402  | -20.5539 | 0.007699 | 0.04022  |
| Fbxw11   | -0.31297 | 0.007753 | 0.04043  |
| Rb1cc1   | -0.21038 | 0.007745 | 0.040405 |
| Ift122   | -0.61129 | 0.007649 | 0.040058 |
| Cisd2    | -0.27235 | 0.007617 | 0.039902 |
| Elovl7   | -0.23557 | 0.007604 | 0.039861 |

|           |          |          |          |
|-----------|----------|----------|----------|
| Epha4     | -0.24931 | 0.007597 | 0.039853 |
| Hnrnph3   | -0.2317  | 0.007595 | 0.039853 |
| Bckdhb    | -0.8562  | 0.007528 | 0.039556 |
| Pcsk1n    | -0.42515 | 0.00753  | 0.039556 |
| Rasgrf2   | -0.51259 | 0.007524 | 0.039556 |
| Cog7      | -0.34182 | 0.007525 | 0.039556 |
| Neurod1   | -0.29142 | 0.007524 | 0.039556 |
| Palld     | -0.64544 | 0.007413 | 0.039046 |
| Car5a     | -0.25536 | 0.00742  | 0.039064 |
| Cep104    | -0.47308 | 0.00735  | 0.03879  |
| Gm14251   | -19.7062 | 0.007275 | 0.038449 |
| Rnf152    | -0.44205 | 0.007266 | 0.038414 |
| Phf11d    | -0.45715 | 0.007221 | 0.038203 |
| Gm42974   | -2.48928 | 0.007125 | 0.037749 |
| Megf9     | -0.46286 | 0.007176 | 0.037975 |
| Lamp3     | -19.6083 | 0.007094 | 0.037699 |
| Psm6      | -0.29103 | 0.007131 | 0.037766 |
| Aggf1     | -0.31296 | 0.007125 | 0.037749 |
| Rab11fip1 | -0.41402 | 0.007122 | 0.037749 |
| Cpsf2     | -0.37666 | 0.007119 | 0.037749 |
| Tmcc2     | -0.4749  | 0.007098 | 0.037699 |
| Ddx39b    | -0.23611 | 0.007092 | 0.037699 |
| Slc25a3   | -0.15928 | 0.007005 | 0.037275 |
| Cped1     | -0.47856 | 0.00696  | 0.037069 |
| Fancb     | -1.18044 | 0.006858 | 0.036579 |
| Atxn7     | -0.29831 | 0.006876 | 0.03665  |
| Arhgap11a | -2.90225 | 0.006782 | 0.03625  |
| F830115B0 | -0.83889 | 0.006808 | 0.03634  |
| Enpep     | -0.48807 | 0.006839 | 0.036493 |
| Vangl2    | -0.40711 | 0.006794 | 0.036293 |
| Plekhj1   | -0.29172 | 0.006795 | 0.036293 |
| Prdm16    | -0.33029 | 0.006798 | 0.036299 |
| Fgf13     | -0.90529 | 0.006754 | 0.03614  |
| Acin1     | -0.19372 | 0.006781 | 0.03625  |
| Arih2     | -0.44427 | 0.006753 | 0.03614  |
| Nme3      | -1.63241 | 0.006693 | 0.035863 |
| Gbp4      | -0.36268 | 0.006714 | 0.035966 |
| Atad2b    | -0.32169 | 0.006663 | 0.035716 |
| D030056L1 | -0.46499 | 0.006662 | 0.035716 |
| Lhfpl3    | -0.81588 | 0.006608 | 0.035477 |
| Gm17241   | -20.5301 | 0.006539 | 0.035217 |
| Snhg20    | -0.36545 | 0.006596 | 0.035433 |
| Gprc5c    | -0.40439 | 0.006555 | 0.035258 |
| Id2       | -0.32094 | 0.006556 | 0.035258 |
| Cdkal1    | -0.44626 | 0.006484 | 0.034959 |
| Alox12    | -0.79275 | 0.00644  | 0.034773 |
| Hipk2     | -0.31975 | 0.006452 | 0.034821 |

|           |          |          |          |
|-----------|----------|----------|----------|
| Thy1      | -1.52412 | 0.006369 | 0.034468 |
| Zfp759    | -1.42263 | 0.006307 | 0.034165 |
| Bspry     | -2.4668  | 0.0062   | 0.033647 |
| Nrl       | -0.22768 | 0.006225 | 0.03377  |
| Mx2       | -0.91462 | 0.006157 | 0.033447 |
| A930016O  | -2.91924 | 0.006076 | 0.033081 |
| Dync1h1   | -0.18893 | 0.006097 | 0.033168 |
| Homer2    | -1.65323 | 0.006027 | 0.03288  |
| Hprt      | -0.20844 | 0.006035 | 0.032892 |
| ENSMUSG   | -2.67282 | 0.005915 | 0.032382 |
| Pcp2      | -0.68867 | 0.00594  | 0.032479 |
| Gbp5      | -0.44497 | 0.005954 | 0.032548 |
| Cstf2     | -0.4909  | 0.005925 | 0.032422 |
| Sccpdh    | -0.48049 | 0.005928 | 0.032425 |
| Abcc6     | -0.88513 | 0.005888 | 0.032269 |
| Nsg2      | -1.37866 | 0.005874 | 0.032205 |
| Orc2      | -0.44507 | 0.005845 | 0.032067 |
| Pus3      | -0.70052 | 0.005827 | 0.031993 |
| Gm43637   | -1.2999  | 0.005774 | 0.031762 |
| D630033O  | -0.77635 | 0.005789 | 0.03182  |
| Hpf1      | -0.28448 | 0.005781 | 0.031787 |
| Tet2      | -0.34071 | 0.005712 | 0.031443 |
| Rnf167    | -0.28238 | 0.005711 | 0.031443 |
| Kdm4b     | -0.61371 | 0.00564  | 0.031126 |
| Srrt      | -0.35985 | 0.00565  | 0.031156 |
| Hcfc1     | -0.34036 | 0.005642 | 0.031126 |
| Zfp804b   | -3.02697 | 0.005546 | 0.030678 |
| Gm48420   | -1.80549 | 0.005547 | 0.030678 |
| Dcun1d4   | -0.63015 | 0.005578 | 0.030829 |
| Gins3     | -1.18345 | 0.005542 | 0.030674 |
| Plcl1     | -0.44875 | 0.005565 | 0.030768 |
| Foxd1     | -0.743   | 0.005536 | 0.030655 |
| Abr       | -0.29076 | 0.00548  | 0.030365 |
| Gnb1l     | -1.44732 | 0.005413 | 0.030073 |
| Zc3hav1   | -0.33242 | 0.005459 | 0.03027  |
| Bptf      | -0.1804  | 0.005419 | 0.030092 |
| Gfra2     | -0.52479 | 0.005402 | 0.030033 |
| Gm48673   | -1.42362 | 0.005347 | 0.029804 |
| 4930578M  | -4.06363 | 0.005327 | 0.029705 |
| Nifk      | -0.41618 | 0.005375 | 0.029923 |
| Atp2c1    | -0.22418 | 0.00538  | 0.029933 |
| Zic4      | -0.64822 | 0.005364 | 0.029879 |
| Epha10    | -2.95408 | 0.005303 | 0.029579 |
| 1700030J2 | -1.79195 | 0.005255 | 0.029381 |
| Ahsa2     | -0.38971 | 0.005272 | 0.029454 |
| Fndc4     | -0.73001 | 0.005237 | 0.029298 |
| Zfp882    | -0.82771 | 0.005182 | 0.029025 |

|           |          |          |          |
|-----------|----------|----------|----------|
| Scap      | -0.45818 | 0.005161 | 0.02893  |
| Cenpq     | -0.97707 | 0.005102 | 0.02861  |
| Eef1a2    | -1.89332 | 0.005069 | 0.028468 |
| Txnl4a    | -0.38421 | 0.005089 | 0.028545 |
| Arl4a     | -0.14263 | 0.00508  | 0.028505 |
| Deaf1     | -0.5955  | 0.005069 | 0.028468 |
| Gm11196   | -20.4106 | 0.004976 | 0.027987 |
| Gm12346   | -0.98696 | 0.004975 | 0.027987 |
| 2210406O  | -20.498  | 0.004917 | 0.027717 |
| Gpr37     | -0.6519  | 0.004959 | 0.027912 |
| Nudt4     | -0.23374 | 0.00493  | 0.027781 |
| Gtf2ird2  | -1.17381 | 0.004881 | 0.027555 |
| Nxpe4     | -0.22564 | 0.004894 | 0.027612 |
| Clip3     | -0.61642 | 0.004849 | 0.027414 |
| Rptor     | -0.5269  | 0.004833 | 0.027334 |
| Prkd2     | -0.34796 | 0.00474  | 0.026894 |
| Spsb3     | -0.52907 | 0.004737 | 0.026884 |
| Slain2    | -0.28469 | 0.004725 | 0.026833 |
| Dgcr8     | -0.52182 | 0.004702 | 0.026755 |
| Tnpo1     | -0.24606 | 0.004698 | 0.026742 |
| Chd6      | -0.24391 | 0.004685 | 0.02668  |
| Cfap20    | -0.32569 | 0.004672 | 0.026627 |
| Bod1l     | -0.21657 | 0.00467  | 0.026627 |
| Tbck      | -0.47093 | 0.004657 | 0.026569 |
| Efemp1    | -0.99471 | 0.004613 | 0.026379 |
| 5033404E: | -0.87818 | 0.004579 | 0.026197 |
| Lclat1    | -0.56569 | 0.004577 | 0.026197 |
| A930004D  | -0.86148 | 0.00451  | 0.025862 |
| Phf8      | -0.47207 | 0.004504 | 0.025839 |
| Gm43653   | -20.5766 | 0.004416 | 0.025469 |
| Gm14239   | -1.36506 | 0.004418 | 0.025469 |
| Kcne1l    | -1.23443 | 0.004423 | 0.025488 |
| Rbpms2    | -0.62224 | 0.004438 | 0.025537 |
| Cetn3     | -0.23411 | 0.004437 | 0.025537 |
| Pdlim4    | -0.8766  | 0.004404 | 0.02544  |
| Gldc      | -1.05436 | 0.004385 | 0.025355 |
| Glcci1    | -0.85897 | 0.004396 | 0.025409 |
| Cxcr4     | -1.15288 | 0.004362 | 0.025254 |
| Limch1    | -0.19946 | 0.004398 | 0.025414 |
| Fmr1      | -0.31827 | 0.004374 | 0.025316 |
| Pdzph1    | -0.46794 | 0.004337 | 0.025129 |
| 2310047D  | -2.64729 | 0.004289 | 0.024909 |
| Gm45428   | -19.5537 | 0.004288 | 0.024909 |
| Crx       | -0.2875  | 0.004319 | 0.025054 |
| Ankfy1    | -0.39398 | 0.004285 | 0.024909 |
| Ctcf      | -0.21335 | 0.004279 | 0.024891 |
| Idh3g     | -0.30345 | 0.004237 | 0.024674 |



|          |          |          |          |
|----------|----------|----------|----------|
| Heatr5a  | -0.36839 | 0.004223 | 0.024621 |
| Rhpn2    | -0.5102  | 0.004221 | 0.024618 |
| Robo2    | -1.68005 | 0.00416  | 0.024308 |
| Rwdd2b   | -1.19827 | 0.004153 | 0.02429  |
| Trem2    | -3.19904 | 0.004104 | 0.024037 |
| Glmn     | -0.45194 | 0.004156 | 0.024297 |
| Fbxo21   | -0.43043 | 0.00414  | 0.02422  |
| Ppp1r3c  | -0.98104 | 0.004097 | 0.024005 |
| Slc24a1  | -0.26157 | 0.004108 | 0.024052 |
| Mir6236  | -0.19213 | 0.004074 | 0.023883 |
| Dpp8     | -0.30245 | 0.004054 | 0.023776 |
| Emsy     | -0.28876 | 0.003991 | 0.023451 |
| Dapk2    | -1.13085 | 0.003966 | 0.023334 |
| Abcb9    | -0.88491 | 0.003925 | 0.023107 |
| Mtr      | -0.50484 | 0.003932 | 0.023143 |
| Tpgs2    | -0.46657 | 0.003924 | 0.023107 |
| Zmat4    | -0.80428 | 0.003898 | 0.023002 |
| Eif4g2   | -0.14185 | 0.003905 | 0.02302  |
| Fam118b  | -0.42306 | 0.003901 | 0.023009 |
| Gm47496  | -20.817  | 0.003832 | 0.022684 |
| Gm43667  | -0.89802 | 0.003846 | 0.022756 |
| Pibf1    | -0.46853 | 0.003847 | 0.022756 |
| Cnga1    | -0.26366 | 0.003852 | 0.022777 |
| Lsm11    | -0.65234 | 0.003793 | 0.022498 |
| Atp6v0e2 | -0.38315 | 0.0038   | 0.022531 |
| mt-Ts2   | -1.1478  | 0.003761 | 0.02232  |
| Gm43379  | -1.02403 | 0.003752 | 0.022275 |
| 9130230N | -1.01322 | 0.003752 | 0.022275 |
| Tyw3     | -0.91981 | 0.003742 | 0.02226  |
| Nek4     | -0.62439 | 0.003752 | 0.022275 |
| 2610044O | -0.61805 | 0.003749 | 0.022275 |
| Gucy2f   | -0.67982 | 0.003738 | 0.022256 |
| Col8a1   | -0.69064 | 0.003741 | 0.022259 |
| Gm9670   | -20.6959 | 0.003691 | 0.022044 |
| Dhx58    | -0.97095 | 0.00371  | 0.022132 |
| Egfl8    | -0.438   | 0.003734 | 0.022236 |
| Rgs7bp   | -0.56313 | 0.00373  | 0.022233 |
| Gfod1    | -0.59952 | 0.003709 | 0.022132 |
| D130007C | -1.68372 | 0.003654 | 0.021839 |
| Kti12    | -0.48871 | 0.003695 | 0.022057 |
| Ndufs7   | -0.22291 | 0.003684 | 0.022008 |
| AA414768 | -2.2546  | 0.003573 | 0.021409 |
| Gm37023  | -1.63521 | 0.003564 | 0.02137  |
| Colca2   | -0.84247 | 0.003596 | 0.021513 |
| Fam161a  | -0.36058 | 0.003588 | 0.021472 |
| Lyst     | -0.31637 | 0.003573 | 0.021409 |
| Dlg4     | -0.39717 | 0.003538 | 0.021246 |

|           |          |          |          |
|-----------|----------|----------|----------|
| Gm30015   | -3.08752 | 0.003473 | 0.020895 |
| Epn2      | -0.22016 | 0.003494 | 0.020992 |
| Rab11fip4 | -1.07169 | 0.003475 | 0.020896 |
| Tecpr1    | -0.28772 | 0.003474 | 0.020895 |
| Pfn2      | -0.33396 | 0.003444 | 0.02076  |
| Gm42842   | -20.3907 | 0.003389 | 0.020545 |
| Pde6a     | -0.23464 | 0.003439 | 0.020737 |
| Tbc1d9    | -1.31026 | 0.003411 | 0.020625 |
| Gm29609   | -21.0929 | 0.003385 | 0.020544 |
| Zfp40     | -0.66273 | 0.003414 | 0.020625 |
| Bhlhe22   | -0.86218 | 0.003412 | 0.020625 |
| H2bc21    | -0.82521 | 0.003407 | 0.020625 |
| Camk2d    | -0.25554 | 0.003407 | 0.020625 |
| Fgf2      | -0.84149 | 0.003389 | 0.020545 |
| C630004M  | -2.02656 | 0.003348 | 0.020374 |
| Pbrm1     | -0.1959  | 0.003395 | 0.02057  |
| Nbea      | -0.31819 | 0.003389 | 0.020545 |
| Pde4dip   | -0.45244 | 0.003383 | 0.02054  |
| Sms       | -0.40384 | 0.003377 | 0.020513 |
| Fgf9      | -1.07394 | 0.00336  | 0.020441 |
| Ndp       | -2.14127 | 0.003292 | 0.020105 |
| Ccnf      | -20.3031 | 0.003287 | 0.020092 |
| Ankrd40   | -0.2724  | 0.003323 | 0.020267 |
| Qtrt2     | -0.79066 | 0.003304 | 0.020167 |
| Zcchc7    | -0.25499 | 0.003309 | 0.020185 |
| Mien1     | -0.3154  | 0.003293 | 0.020105 |
| 4921516A  | -1.40589 | 0.003263 | 0.019956 |
| Tec       | -0.73944 | 0.003245 | 0.019885 |
| Gen1      | -19.7609 | 0.003205 | 0.01969  |
| She       | -0.22405 | 0.003249 | 0.019893 |
| Gm20139   | -1.1737  | 0.003214 | 0.019737 |
| Zfp420    | -0.83538 | 0.003221 | 0.019774 |
| Bpgm      | -0.433   | 0.003229 | 0.019804 |
| Tspan7    | -0.35754 | 0.003186 | 0.019585 |
| Norad     | -0.24473 | 0.003118 | 0.019224 |
| Cdk19     | -0.26603 | 0.003103 | 0.019166 |
| Lrprrc    | -0.57848 | 0.003086 | 0.019073 |
| Myh14     | -0.92793 | 0.003064 | 0.018947 |
| Map7d2    | -0.65062 | 0.003014 | 0.018661 |
| mt-Tv     | -0.85375 | 0.003005 | 0.018623 |
| C030034I2 | -0.66525 | 0.003004 | 0.018622 |
| Aldh1l1   | -1.32622 | 0.002979 | 0.018502 |
| Lrit1     | -0.65418 | 0.00297  | 0.018459 |
| Gm47652   | -2.19906 | 0.002932 | 0.018278 |
| Hdac11    | -0.87188 | 0.002953 | 0.018371 |
| Chrdl1    | -1.42312 | 0.002946 | 0.018342 |
| Plaat3    | -0.27203 | 0.002959 | 0.018395 |

|           |          |          |          |
|-----------|----------|----------|----------|
| Nol7      | -0.21314 | 0.002951 | 0.018362 |
| Speg      | -0.80923 | 0.002921 | 0.018212 |
| Prpf39    | -0.32732 | 0.002918 | 0.018206 |
| Fgf1      | -0.91529 | 0.002894 | 0.018078 |
| 2700029LC | -2.25995 | 0.002824 | 0.017702 |
| Gabpb2    | -0.40233 | 0.002868 | 0.017938 |
| Rfc3      | -0.64844 | 0.00286  | 0.017901 |
| Ddit4l    | -0.51554 | 0.002854 | 0.017871 |
| Slc19a3   | -0.32853 | 0.002845 | 0.017825 |
| Gm14391   | -2.0305  | 0.002799 | 0.017584 |
| 1700012D  | -0.98806 | 0.002806 | 0.017622 |
| Gm48600   | -1.16535 | 0.002793 | 0.01756  |
| Ifih1     | -0.36996 | 0.002817 | 0.017671 |
| Nmi       | -0.38622 | 0.002808 | 0.017627 |
| Nek1      | -0.57574 | 0.002794 | 0.017563 |
| Gm48619   | -19.8899 | 0.002742 | 0.017295 |
| Lzic      | -0.64698 | 0.002776 | 0.017464 |
| Timp2     | -0.4377  | 0.002766 | 0.017416 |
| Atp1a3    | -0.31079 | 0.002764 | 0.017412 |
| Cwc15     | -0.23362 | 0.002754 | 0.017358 |
| Plk2      | -0.23194 | 0.002742 | 0.017295 |
| Cyb5b     | -0.29404 | 0.002735 | 0.01727  |
| E230020D  | -0.76748 | 0.002723 | 0.017216 |
| Pik3r1    | -0.27446 | 0.002726 | 0.017218 |
| Sh3pxd2a  | -0.44006 | 0.002701 | 0.017097 |
| Gng11     | -0.14881 | 0.0027   | 0.017097 |
| Atp1b1    | -0.86485 | 0.002689 | 0.017047 |
| Gypc      | -1.01613 | 0.002677 | 0.016975 |
| Sox2      | -0.72354 | 0.002676 | 0.016975 |
| Gm48086   | -1.6824  | 0.002644 | 0.016794 |
| Gm15903   | -2.12764 | 0.002591 | 0.016526 |
| Slc66a2   | -0.32813 | 0.002614 | 0.016637 |
| Itgb5     | -0.38179 | 0.00261  | 0.016623 |
| Gm43268   | -1.71694 | 0.002569 | 0.016406 |
| Top2b     | -0.23232 | 0.002573 | 0.016423 |
| Dusp7     | -0.29915 | 0.00257  | 0.016406 |
| Tcf15     | -0.33464 | 0.002557 | 0.016347 |
| Trnt1     | -0.47913 | 0.002538 | 0.01623  |
| Cert1     | -0.19296 | 0.002518 | 0.016118 |
| Gm36963   | -1.50773 | 0.002482 | 0.01594  |
| Kbtbd8    | -1.18495 | 0.002476 | 0.015909 |
| Gm15789   | -19.3409 | 0.002455 | 0.015813 |
| Gm37960   | -1.43043 | 0.002469 | 0.015886 |
| Map3k4    | -0.36014 | 0.00249  | 0.015967 |
| Llgl1     | -0.49882 | 0.002486 | 0.015953 |
| Gm15513   | -1.13438 | 0.002455 | 0.015813 |
| Adck1     | -0.79583 | 0.002458 | 0.01582  |

|           |          |          |          |
|-----------|----------|----------|----------|
| Suv39h1   | -0.73816 | 0.002456 | 0.015813 |
| Focad     | -0.81336 | 0.002438 | 0.015731 |
| Hmgb1     | -0.15649 | 0.002446 | 0.015779 |
| Ube2l6    | -0.55903 | 0.002429 | 0.015688 |
| Magi2     | -0.77357 | 0.002422 | 0.015647 |
| Tsc1      | -0.54472 | 0.002419 | 0.01564  |
| Nipal3    | -0.4829  | 0.002407 | 0.015574 |
| Fam32a    | -0.28236 | 0.002413 | 0.015605 |
| Adcy1     | -0.65769 | 0.002396 | 0.01551  |
| Papolb    | -3.11115 | 0.002324 | 0.015109 |
| Map2      | -0.40478 | 0.002351 | 0.015253 |
| Zic3      | -0.29411 | 0.002349 | 0.015248 |
| Zfp771    | -0.36054 | 0.002348 | 0.015246 |
| Gm36527   | -2.0964  | 0.002291 | 0.01491  |
| Cog4      | -0.48044 | 0.002296 | 0.014943 |
| Ccdc134   | -1.01847 | 0.002281 | 0.014865 |
| Nomo1     | -0.32866 | 0.002287 | 0.014896 |
| Ccdc24    | -0.97531 | 0.002268 | 0.014794 |
| Tapbp1    | -0.4905  | 0.002264 | 0.014773 |
| Pus1      | -0.80826 | 0.002254 | 0.014716 |
| Snapc5    | -0.31855 | 0.00225  | 0.014695 |
| Mir124-2h | -0.27122 | 0.002249 | 0.014695 |
| mt-Tn     | -1.13388 | 0.00222  | 0.014525 |
| Gm44136   | -3.02447 | 0.002178 | 0.014278 |
| Mtf1      | -0.46301 | 0.002195 | 0.014367 |
| Arhgap10  | -0.46205 | 0.002193 | 0.014366 |
| Adar      | -0.4341  | 0.002166 | 0.014205 |
| Gm48602   | -0.60548 | 0.002157 | 0.014156 |
| Gm33843   | -20.6222 | 0.002119 | 0.013914 |
| 2700033N  | -1.39621 | 0.002118 | 0.013914 |
| Efna5     | -1.7374  | 0.002097 | 0.013809 |
| Krit1     | -0.28906 | 0.002077 | 0.013691 |
| Nudc      | -0.2483  | 0.002069 | 0.013646 |
| Smarcc1   | -0.40671 | 0.002058 | 0.013589 |
| Scube3    | -20.2439 | 0.002016 | 0.013339 |
| Gpx4      | -0.16852 | 0.002015 | 0.013339 |
| Aass      | -1.91169 | 0.001981 | 0.013135 |
| Tubgcp5   | -0.49753 | 0.001997 | 0.013227 |
| Pelp1     | -0.52765 | 0.001976 | 0.013108 |
| Tbx1      | -0.28159 | 0.001953 | 0.012959 |
| 4930405A  | -2.75331 | 0.001907 | 0.012698 |
| Ckmt1     | -0.74343 | 0.00193  | 0.012831 |
| Tkt       | -0.324   | 0.001927 | 0.012819 |
| Gm48700   | -21.0302 | 0.001892 | 0.012615 |
| Gm38253   | -1.96116 | 0.001894 | 0.012619 |
| Smchd1    | -0.26897 | 0.00191  | 0.012706 |
| Ppp1r9a   | -0.66781 | 0.00189  | 0.012605 |

|          |          |          |          |
|----------|----------|----------|----------|
| Cd300lf  | -19.9657 | 0.001863 | 0.012442 |
| Zfp715   | -0.54139 | 0.001849 | 0.01236  |
| Tle4     | -0.34156 | 0.001842 | 0.01232  |
| Klhl20   | -0.50266 | 0.001829 | 0.012255 |
| mt-Tr    | -1.45047 | 0.00178  | 0.011963 |
| Gm3728   | -1.8189  | 0.001757 | 0.011835 |
| A630072M | -0.60193 | 0.001776 | 0.011939 |
| Tbc1d30  | -0.84379 | 0.001761 | 0.011848 |
| Cfap36   | -0.37428 | 0.001759 | 0.011841 |
| Dyrk1a   | -0.41743 | 0.001751 | 0.011802 |
| Pdxdp    | -1.41268 | 0.001729 | 0.011675 |
| Ndst3    | -0.78083 | 0.001731 | 0.011675 |
| Frmd6    | -0.42851 | 0.001731 | 0.011675 |
| Gm10638  | -0.96409 | 0.001726 | 0.011669 |
| Gpr21    | -1.49434 | 0.001697 | 0.011495 |
| Ttbk2    | -0.46797 | 0.001706 | 0.011546 |
| Zfp451   | -0.38461 | 0.001688 | 0.011437 |
| Gm16259  | -2.3266  | 0.001651 | 0.011218 |
| Rrad     | -0.83569 | 0.001676 | 0.01137  |
| Nmnat2   | -1.75329 | 0.001627 | 0.011101 |
| Parg     | -0.47821 | 0.001646 | 0.011186 |
| Bmi1     | -0.40473 | 0.001643 | 0.011182 |
| Cct3     | -0.28456 | 0.001642 | 0.01118  |
| H2aw     | -0.35387 | 0.001595 | 0.010905 |
| Dcun1d2  | -0.67752 | 0.001588 | 0.010858 |
| Gm44283  | -1.01472 | 0.001562 | 0.0107   |
| Gpm6b    | -0.38377 | 0.00158  | 0.010814 |
| Gpr22    | -20.924  | 0.001525 | 0.010494 |
| Rab3gap2 | -0.53845 | 0.001549 | 0.010631 |
| Nrd1     | -0.26351 | 0.001545 | 0.010607 |
| Gm30340  | -20.5687 | 0.001506 | 0.010398 |
| S1pr3    | -0.41832 | 0.001535 | 0.010548 |
| Ccnt2    | -0.36075 | 0.001533 | 0.010535 |
| Usp13    | -20.2907 | 0.001497 | 0.010345 |
| Krt1     | -1.25161 | 0.001512 | 0.010429 |
| Trmt13   | -0.49421 | 0.001513 | 0.010431 |
| Tnrc6b   | -0.22445 | 0.001515 | 0.010439 |
| Rogdi    | -0.54655 | 0.001501 | 0.010366 |
| Cd63     | -0.30344 | 0.001495 | 0.010333 |
| F8       | -1.85113 | 0.001468 | 0.010174 |
| Slc30a10 | -0.5991  | 0.001488 | 0.010291 |
| Pid1     | -0.40288 | 0.001484 | 0.010274 |
| Nup188   | -0.67639 | 0.001466 | 0.010168 |
| Mob1b    | -0.40684 | 0.001465 | 0.010168 |
| Vcl      | -0.27155 | 0.001456 | 0.010128 |
| Ric3     | -0.93111 | 0.001438 | 0.010016 |
| Utp20    | -0.86453 | 0.001441 | 0.010033 |

|          |          |          |          |
|----------|----------|----------|----------|
| Cep350   | -0.32356 | 0.001443 | 0.010047 |
| Zfp950   | -0.35927 | 0.00142  | 0.009919 |
| Zfp503   | -0.5989  | 0.001414 | 0.009887 |
| Zfp85    | -1.14893 | 0.0014   | 0.009802 |
| Trim8    | -0.32855 | 0.001415 | 0.009888 |
| Ank      | -0.5184  | 0.001406 | 0.009834 |
| Vac14    | -0.74373 | 0.0014   | 0.009802 |
| Phactr4  | -0.2836  | 0.001399 | 0.0098   |
| Timm8a1  | -0.75132 | 0.001385 | 0.00972  |
| Gm10785  | -20.4653 | 0.001362 | 0.009582 |
| Fbxo2    | -0.52694 | 0.001358 | 0.009557 |
| Erlin1   | -0.71845 | 0.00134  | 0.009452 |
| Klhl23   | -0.48532 | 0.001341 | 0.009456 |
| Dmxl1    | -0.33933 | 0.001343 | 0.009463 |
| Dars     | -0.43396 | 0.001334 | 0.009414 |
| Zfp760   | -0.65922 | 0.001319 | 0.009327 |
| Sqle     | -0.90808 | 0.001311 | 0.009273 |
| Tff2     | -2.42464 | 0.001283 | 0.009115 |
| Pmf1     | -0.89146 | 0.001294 | 0.009163 |
| Gm43896  | -21.3167 | 0.001262 | 0.008992 |
| Gm42725  | -20.2748 | 0.001258 | 0.008966 |
| Igfbp5   | -0.95719 | 0.001281 | 0.009105 |
| Gm38115  | -0.98692 | 0.001263 | 0.008992 |
| Susd4    | -1.70677 | 0.001265 | 0.008999 |
| Gm7160   | -1.16153 | 0.001247 | 0.008893 |
| Col5a2   | -0.98203 | 0.001241 | 0.008872 |
| Slc17a7  | -0.32227 | 0.001246 | 0.008891 |
| Rapgef4  | -0.30652 | 0.001214 | 0.008698 |
| Parp12   | -0.42892 | 0.001203 | 0.008623 |
| Gm10030  | -1.07264 | 0.001184 | 0.008508 |
| Ankrd13c | -0.46269 | 0.001192 | 0.008554 |
| N4bp2os  | -0.93085 | 0.001182 | 0.008496 |
| Kcnb1    | -0.26465 | 0.001185 | 0.008512 |
| Kank4    | -0.60661 | 0.001181 | 0.008496 |
| Pprc1    | -0.87788 | 0.001172 | 0.008445 |
| Gm19409  | -1.47643 | 0.001163 | 0.008394 |
| Hs3st1   | -0.80525 | 0.001166 | 0.008404 |
| Opn1mw   | -0.62292 | 0.001163 | 0.008394 |
| Rnf20    | -0.37552 | 0.001164 | 0.008394 |
| Miga2    | -0.71777 | 0.001157 | 0.008358 |
| Slmap    | -0.30706 | 0.001147 | 0.0083   |
| Hp1bp3   | -0.24273 | 0.00114  | 0.008265 |
| Arhgap39 | -1.01266 | 0.001129 | 0.008191 |
| Gnb3     | -0.61539 | 0.001125 | 0.008169 |
| Lrig1    | -0.68336 | 0.001119 | 0.008136 |
| Msx1     | -0.68882 | 0.001115 | 0.008121 |
| 6530402F | -1.05685 | 0.001107 | 0.008074 |

|           |          |          |          |
|-----------|----------|----------|----------|
| Pcmt2     | -0.27581 | 0.001116 | 0.008121 |
| Fam118a   | -0.48651 | 0.001113 | 0.008111 |
| Mamdc2    | -1.42006 | 0.001101 | 0.008045 |
| Fam122a   | -0.40895 | 0.001108 | 0.008076 |
| mt-Th     | -2.35088 | 0.001076 | 0.007885 |
| A830082K  | -0.90069 | 0.001069 | 0.007836 |
| Stip1     | -0.41212 | 0.001069 | 0.007837 |
| Gm13889   | -0.46175 | 0.001059 | 0.007774 |
| 3000002C  | -2.51802 | 0.001032 | 0.007614 |
| Rnls      | -4.23266 | 0.001029 | 0.007596 |
| Kif3b     | -0.46438 | 0.001041 | 0.00766  |
| Rpp14     | -0.56708 | 0.001038 | 0.007653 |
| Tmsb15l   | -21.2223 | 0.001015 | 0.007519 |
| Ccdc171   | -2.12588 | 0.001018 | 0.007535 |
| Uaca      | -0.23899 | 0.001029 | 0.007596 |
| Flt3l     | -0.59054 | 0.001021 | 0.007551 |
| Cfap410   | -0.83413 | 0.001007 | 0.00746  |
| Sptbn1    | -0.11035 | 0.001008 | 0.007471 |
| Pcdh19    | -0.39362 | 0.000994 | 0.007371 |
| Orc5      | -0.75684 | 0.000979 | 0.007268 |
| Tprgl     | -0.23675 | 0.00097  | 0.007203 |
| Wdr35     | -1.08941 | 0.000944 | 0.007026 |
| P2ry14    | -0.4023  | 0.000952 | 0.007076 |
| Inpp1     | -0.46045 | 0.000941 | 0.007005 |
| Cfdp1     | -0.30081 | 0.00093  | 0.006928 |
| Prpsap2   | -0.6383  | 0.000919 | 0.006863 |
| Dmd       | -0.31133 | 0.000909 | 0.006791 |
| Crym      | -0.46    | 0.000905 | 0.006767 |
| Ndufa13   | -0.2021  | 0.000904 | 0.006767 |
| Lrtm1     | -1.57739 | 0.00088  | 0.006601 |
| Rgl2      | -0.42311 | 0.000874 | 0.006561 |
| Pard3b    | -0.5288  | 0.000874 | 0.006561 |
| Aldoc     | -0.3814  | 0.000869 | 0.006539 |
| Cntn1     | -0.69921 | 0.000862 | 0.006486 |
| Ppp1r12a  | -0.23516 | 0.000825 | 0.00624  |
| Alg11     | -0.66091 | 0.000816 | 0.006175 |
| Irf6      | -1.35399 | 0.000804 | 0.006101 |
| Gm44667   | -0.71935 | 0.000798 | 0.006062 |
| Snx12     | -0.52013 | 0.000798 | 0.006062 |
| Cavin2    | -0.18019 | 0.000794 | 0.00604  |
| Kat6b     | -0.36408 | 0.000791 | 0.006022 |
| 1700029JC | -1.02911 | 0.000771 | 0.005889 |
| Ddx5      | -0.12553 | 0.000766 | 0.005858 |
| Figl1     | -20.4694 | 0.000744 | 0.00571  |
| Gm48226   | -0.50985 | 0.000761 | 0.005826 |
| Aldoa     | -0.15507 | 0.000762 | 0.005826 |
| Ylpm1     | -0.34883 | 0.000739 | 0.005676 |

|          |          |          |          |
|----------|----------|----------|----------|
| Rnpc3    | -0.47454 | 0.000734 | 0.005642 |
| Cdca3    | -20.0417 | 0.000712 | 0.00548  |
| Gm42449  | -0.77179 | 0.000724 | 0.005567 |
| Cfap206  | -21.2889 | 0.000706 | 0.005438 |
| Col11a2  | -2.74256 | 0.000696 | 0.005371 |
| Vmn1r4   | -20.0932 | 0.000694 | 0.00536  |
| Polg     | -0.44603 | 0.0007   | 0.005403 |
| Gm47512  | -2.11906 | 0.000681 | 0.005276 |
| Lrit3    | -2.47474 | 0.000676 | 0.005245 |
| Sbspon   | -0.915   | 0.000687 | 0.005314 |
| Gm1673   | -0.73194 | 0.000688 | 0.005319 |
| Myom1    | -0.98761 | 0.000674 | 0.005232 |
| Prpf4b   | -0.24397 | 0.000683 | 0.005288 |
| G730003C | -1.38687 | 0.000666 | 0.005177 |
| Zfp964   | -1.33514 | 0.000665 | 0.005171 |
| Kiz      | -0.70879 | 0.000664 | 0.005163 |
| Zfp329   | -0.41241 | 0.000662 | 0.005154 |
| Ppan     | -0.74276 | 0.000649 | 0.005059 |
| Zfp651   | -0.66401 | 0.000647 | 0.005039 |
| Gm16638  | -1.44451 | 0.00064  | 0.004999 |
| Plce1    | -0.41778 | 0.000646 | 0.005038 |
| Fat4     | -0.47885 | 0.000641 | 0.005004 |
| Col26a1  | -3.19335 | 0.000616 | 0.00484  |
| Mrps30   | -0.58456 | 0.000629 | 0.00492  |
| Mmut     | -0.50601 | 0.000628 | 0.004916 |
| Mtss1    | -0.3272  | 0.00063  | 0.004925 |
| Pde8b    | -0.40506 | 0.000627 | 0.004911 |
| Hmgcll1  | -20.6514 | 0.000611 | 0.004802 |
| Gprasp1  | -0.53449 | 0.000623 | 0.00488  |
| Gm30541  | -2.22404 | 0.000602 | 0.004747 |
| Aven     | -0.83266 | 0.000608 | 0.004782 |
| Foxn3    | -0.26367 | 0.000608 | 0.004782 |
| Pvalb    | -20.5476 | 0.000588 | 0.004646 |
| Gm33366  | -3.25928 | 0.000585 | 0.004626 |
| Dctn1    | -0.30517 | 0.000596 | 0.004699 |
| Ceacam1  | -0.33628 | 0.000595 | 0.004697 |
| Gnb1     | -0.13556 | 0.000592 | 0.004669 |
| Lrig2    | -0.60624 | 0.000586 | 0.004636 |
| Aipl1    | -0.3612  | 0.000583 | 0.004615 |
| Wdr5b    | -1.10958 | 0.000575 | 0.004559 |
| Hirip3   | -0.62717 | 0.000572 | 0.004535 |
| Epha5    | -0.85635 | 0.000556 | 0.004423 |
| Cdc42se1 | -0.39038 | 0.000557 | 0.004428 |
| Gm43480  | -3.57846 | 0.000538 | 0.004287 |
| Oasl1    | -1.1226  | 0.000544 | 0.004333 |
| 2610017A | -20.9123 | 0.000522 | 0.004167 |
| Gm38302  | -3.7713  | 0.000504 | 0.004039 |



|          |          |          |          |
|----------|----------|----------|----------|
| Rbm34    | -0.51626 | 0.00051  | 0.00408  |
| Map7d1   | -0.28219 | 0.000511 | 0.004083 |
| Hic1     | -0.5078  | 0.000508 | 0.004069 |
| Gm20492  | -1.87472 | 0.000488 | 0.003925 |
| Csk      | -0.41854 | 0.000492 | 0.003953 |
| Ddx60    | -0.69751 | 0.000478 | 0.003853 |
| Ctr9     | -0.43333 | 0.000478 | 0.003848 |
| Creb5    | -1.43007 | 0.000466 | 0.003771 |
| Dpy19l1  | -0.42005 | 0.000471 | 0.003798 |
| 4930572G | -20.7002 | 0.000457 | 0.003709 |
| Rbp3     | -0.27243 | 0.000469 | 0.003789 |
| Arhgap1  | -0.44759 | 0.000466 | 0.003769 |
| Dkc1     | -0.45542 | 0.000463 | 0.003747 |
| Igf2     | -20.5967 | 0.000443 | 0.00361  |
| Atp2a3   | -0.52703 | 0.000455 | 0.003691 |
| Psd3     | -0.45388 | 0.00045  | 0.003657 |
| Ints8    | -0.64145 | 0.000447 | 0.00364  |
| Foxc1    | -0.24387 | 0.00045  | 0.003657 |
| Rbm26    | -0.3787  | 0.000438 | 0.003567 |
| Neo1     | -0.5333  | 0.000426 | 0.003481 |
| Adcy5    | -0.92091 | 0.000424 | 0.003467 |
| Nat8f1   | -0.67036 | 0.000417 | 0.003415 |
| Hspa2    | -0.4749  | 0.000415 | 0.003399 |
| Gm28151  | -1.22855 | 0.000404 | 0.003318 |
| Sc1t1    | -0.56417 | 0.000402 | 0.003308 |
| Gm45509  | -1.54849 | 0.000393 | 0.003242 |
| Tns3     | -0.40074 | 0.000399 | 0.003286 |
| Tmem184i | -0.76537 | 0.000394 | 0.00325  |
| Sox9     | -0.74462 | 0.000397 | 0.003266 |
| Acyp2    | -0.50648 | 0.000396 | 0.003261 |
| Fubp1    | -0.26724 | 0.000393 | 0.003242 |
| Mllt6    | -0.31462 | 0.000388 | 0.003208 |
| Msl3     | -0.53691 | 0.000372 | 0.003082 |
| Hnrnpu   | -0.20328 | 0.000373 | 0.003093 |
| Fhl1     | -0.85144 | 0.000367 | 0.00305  |
| Gm48063  | -20.8569 | 0.000357 | 0.002973 |
| Rp1      | -0.25953 | 0.000359 | 0.002988 |
| Kcnq1ot1 | -0.40268 | 0.000357 | 0.002973 |
| Pls3     | -0.24179 | 0.000355 | 0.002956 |
| Gm47543  | -0.80383 | 0.000349 | 0.002919 |
| Ddx46    | -0.33428 | 0.000351 | 0.002932 |
| Gm15728  | -21.37   | 0.00034  | 0.00285  |
| Ap3s1    | -0.30043 | 0.00035  | 0.002922 |
| Brpf3    | -0.85756 | 0.000337 | 0.002821 |
| Gm12216  | -0.91519 | 0.000337 | 0.002821 |
| Ribc2    | -20.7495 | 0.000328 | 0.002762 |
| Fzd3     | -0.72151 | 0.000334 | 0.002807 |

|          |          |          |          |
|----------|----------|----------|----------|
| Wnt5b    | -1.07381 | 0.000327 | 0.002753 |
| Gm9725   | -20.1209 | 0.000318 | 0.002686 |
| Mtag2    | -20.4248 | 0.000315 | 0.002667 |
| Cald1    | -0.25295 | 0.000319 | 0.002695 |
| Abca9    | -0.93351 | 0.000316 | 0.002675 |
| Cys1     | -1.00972 | 0.000316 | 0.002671 |
| Kctd10   | -0.29091 | 0.000316 | 0.002671 |
| Gm43005  | -1.91306 | 0.000305 | 0.002589 |
| Gucy1a1  | -0.43015 | 0.000306 | 0.002597 |
| Gm10549  | -20.9105 | 0.000291 | 0.00248  |
| Tnk2     | -0.44395 | 0.000299 | 0.002537 |
| Enpp1    | -1.36526 | 0.000292 | 0.002481 |
| Prkn     | -2.11625 | 0.000287 | 0.002449 |
| Stat2    | -0.43822 | 0.000293 | 0.002487 |
| Smurf2   | -0.37271 | 0.000289 | 0.002459 |
| Otx2os1  | -1.50992 | 0.000282 | 0.002408 |
| Six3     | -0.70834 | 0.000286 | 0.002438 |
| Raph1    | -0.36802 | 0.000282 | 0.002413 |
| AU020206 | -0.66103 | 0.000275 | 0.002355 |
| F730043M | -1.86407 | 0.000271 | 0.002326 |
| Ciz1     | -0.50232 | 0.000272 | 0.00233  |
| Mettl3   | -0.74692 | 0.000271 | 0.002323 |
| Ttc14    | -0.29879 | 0.000272 | 0.00233  |
| Anapc13  | -0.32947 | 0.000272 | 0.00233  |
| Rasl12   | -0.66846 | 0.00027  | 0.002323 |
| Gm45132  | -2.39857 | 0.00026  | 0.002243 |
| Dnaaf8   | -21.3129 | 0.000257 | 0.002223 |
| Espn     | -0.54767 | 0.000265 | 0.002277 |
| Rnd2     | -0.48021 | 0.00026  | 0.002243 |
| Pkd1     | -0.36188 | 0.00026  | 0.002241 |
| Atmin    | -0.68884 | 0.000254 | 0.002198 |
| Slco3a1  | -0.50248 | 0.000255 | 0.002209 |
| Sparcl1  | -0.15342 | 0.000256 | 0.002216 |
| Gcn1     | -0.45875 | 0.000251 | 0.002182 |
| Ephb1    | -1.15738 | 0.000248 | 0.002159 |
| Dse      | -1.24566 | 0.000248 | 0.002159 |
| Mfhas1   | -0.30621 | 0.000238 | 0.002079 |
| Prkar2b  | -0.56124 | 0.000237 | 0.002077 |
| Elf1     | -0.3412  | 0.000237 | 0.002077 |
| Atp2b2   | -1.99787 | 0.000225 | 0.001975 |
| mt-Te    | -1.89503 | 0.000223 | 0.001963 |
| Slc16a12 | -0.77515 | 0.000226 | 0.001987 |
| Tdrd7    | -0.44644 | 0.000224 | 0.001975 |
| Tma7     | -0.18808 | 0.00022  | 0.001941 |
| Tpcn1    | -0.44249 | 0.000215 | 0.001899 |
| Pank1    | -0.88925 | 0.000213 | 0.001882 |
| Arl2bp   | -0.27017 | 0.000211 | 0.001866 |

|           |          |          |          |
|-----------|----------|----------|----------|
| Apba1     | -1.12519 | 0.000208 | 0.001843 |
| Gap43     | -1.0932  | 0.000203 | 0.001809 |
| BC022960  | -21.1211 | 0.000198 | 0.001774 |
| Cited4    | -1.01849 | 0.000203 | 0.001812 |
| Fmnl3     | -0.34524 | 0.000204 | 0.001818 |
| Gm42992   | -1.06589 | 0.000201 | 0.001792 |
| Smc6      | -0.32177 | 0.000198 | 0.001775 |
| Cgnl1     | -0.22958 | 0.000197 | 0.001766 |
| Ndn       | -0.73588 | 0.000191 | 0.00172  |
| Efr3b     | -0.28118 | 0.000193 | 0.00173  |
| Uqcc2     | -0.26743 | 0.000188 | 0.001693 |
| Tuba1b    | -0.25086 | 0.000188 | 0.001691 |
| Etohd2    | -1.67784 | 0.000181 | 0.001634 |
| Ninl      | -2.14644 | 0.000178 | 0.001609 |
| Vezf1     | -0.27522 | 0.000184 | 0.00166  |
| Acsl5     | -0.42714 | 0.000181 | 0.001639 |
| Plekhg1   | -0.40092 | 0.000179 | 0.001622 |
| Rps19-ps6 | -2.66302 | 0.000172 | 0.001566 |
| Taf1      | -0.40712 | 0.000178 | 0.001609 |
| Rev3l     | -0.52691 | 0.000176 | 0.001601 |
| BC065397  | -1.79438 | 0.000175 | 0.001592 |
| C1qtnf7   | -1.15087 | 0.000175 | 0.001591 |
| Kmt2a     | -0.2586  | 0.000175 | 0.001593 |
| Mdh1      | -0.31375 | 0.000171 | 0.00156  |
| Coq7      | -0.60935 | 0.000169 | 0.001546 |
| BC055324  | -2.55139 | 0.000161 | 0.00148  |
| Plxdc2    | -0.44939 | 0.000166 | 0.001517 |
| Anp32e    | -0.30186 | 0.000162 | 0.001486 |
| Cth       | -2.63622 | 0.000153 | 0.001414 |
| Hspd1     | -0.33778 | 0.000159 | 0.00146  |
| Crebbp    | -0.27339 | 0.000159 | 0.001461 |
| Mab21l1   | -0.69018 | 0.000157 | 0.001443 |
| Npy1r     | -1.32871 | 0.000156 | 0.001433 |
| Stard10   | -0.58116 | 0.000157 | 0.001446 |
| Prrc2b    | -0.26253 | 0.000157 | 0.001446 |
| Erg28     | -0.56795 | 0.000156 | 0.001433 |
| Csrp3     | -21.4835 | 0.000148 | 0.001372 |
| Trim34a   | -0.63312 | 0.00015  | 0.00139  |
| Tub       | -0.5945  | 0.000148 | 0.001371 |
| Proser2   | -0.52275 | 0.000149 | 0.001376 |
| Cd320     | -0.36905 | 0.000148 | 0.001371 |
| Itpkb     | -0.28697 | 0.000148 | 0.001371 |
| Slc8a1    | -1.29639 | 0.000144 | 0.001336 |
| Gm44552   | -21.2473 | 0.000138 | 0.001289 |
| Kansl1l   | -0.5352  | 0.000142 | 0.001319 |
| Gcat      | -1.41516 | 0.000139 | 0.001292 |
| Gpr155    | -0.74359 | 0.00014  | 0.001302 |

|           |          |          |          |
|-----------|----------|----------|----------|
| Serinc4   | -1.05576 | 0.000138 | 0.001288 |
| Gm43585   | -2.51313 | 0.000134 | 0.001257 |
| Cacna2d1  | -0.73838 | 0.000136 | 0.001271 |
| Cul4a     | -0.48079 | 0.000133 | 0.001248 |
| C130071C1 | -1.11868 | 0.000127 | 0.001196 |
| Pop5      | -0.29229 | 0.000127 | 0.001196 |
| Gm47525   | -20.7901 | 0.000119 | 0.001129 |
| Gm48314   | -2.71086 | 0.000115 | 0.001092 |
| Hmgcs1    | -0.47738 | 0.000117 | 0.001113 |
| Flna      | -0.35435 | 0.000114 | 0.00109  |
| Gbp2      | -0.50985 | 0.000114 | 0.00109  |
| Rrnad1    | -0.70303 | 0.000113 | 0.001077 |
| Septin7   | -0.22175 | 0.00011  | 0.001047 |
| Nfix      | -0.32424 | 0.00011  | 0.001047 |
| Gm26660   | -1.39753 | 0.000107 | 0.001023 |
| B9d1      | -0.95559 | 0.000107 | 0.001028 |
| Bmp5      | -0.83607 | 0.000108 | 0.001036 |
| Shank1    | -2.06753 | 0.000101 | 0.00097  |
| Thoc2     | -0.29854 | 0.000104 | 0.001002 |
| Rph3a     | -2.62986 | 9.79E-05 | 0.000945 |
| AW047730  | -1.1777  | 9.59E-05 | 0.000928 |
| Eif1b     | -0.31192 | 9.71E-05 | 0.000939 |
| 17000480  | -1.938   | 9.31E-05 | 0.000903 |
| Sipa1l2   | -0.50826 | 9.58E-05 | 0.000928 |
| Odad3     | -20.5316 | 9.05E-05 | 0.000881 |
| Lrp8os3   | -21.0289 | 9.00E-05 | 0.000876 |
| Polr2e    | -0.29044 | 9.10E-05 | 0.000884 |
| Edn3      | -0.64736 | 9.08E-05 | 0.000883 |
| Gm26631   | -2.24995 | 8.62E-05 | 0.000842 |
| Tagln3    | -1.23794 | 8.70E-05 | 0.000849 |
| Gm50055   | -1.97588 | 8.26E-05 | 0.000809 |
| Grip2     | -1.75801 | 8.21E-05 | 0.000806 |
| Pnn       | -0.30917 | 8.43E-05 | 0.000825 |
| Gm49970   | -1.97928 | 7.96E-05 | 0.000784 |
| Gm47558   | -5.07604 | 7.84E-05 | 0.000773 |
| Dusp16    | -0.66261 | 8.02E-05 | 0.000789 |
| Kmt2c     | -0.30346 | 8.04E-05 | 0.000791 |
| Cdh2      | -0.45415 | 8.00E-05 | 0.000787 |
| Serinc5   | -0.56147 | 7.60E-05 | 0.000752 |
| Zic1      | -0.5695  | 7.56E-05 | 0.000749 |
| Oxct1     | -0.49453 | 7.57E-05 | 0.000749 |
| Ptprd     | -0.88127 | 7.42E-05 | 0.000737 |
| Ncf2      | -0.93419 | 7.36E-05 | 0.000731 |
| Skida1    | -0.95273 | 7.19E-05 | 0.000715 |
| Zbtb37    | -0.58453 | 7.07E-05 | 0.000705 |
| Calm3     | -0.28013 | 7.12E-05 | 0.00071  |
| Lhfp      | -0.4601  | 6.96E-05 | 0.000694 |

|           |          |          |          |
|-----------|----------|----------|----------|
| Thbs2     | -1.16121 | 6.80E-05 | 0.000681 |
| Cpeb4     | -0.41151 | 6.84E-05 | 0.000685 |
| Bche      | -1.6776  | 6.65E-05 | 0.000667 |
| 4930534H  | -21.015  | 6.43E-05 | 0.000645 |
| Bicd1     | -1.43126 | 6.50E-05 | 0.000653 |
| Gpr153    | -0.86665 | 6.36E-05 | 0.00064  |
| Moxd1     | -20.7196 | 6.10E-05 | 0.000615 |
| Tcf7      | -0.45837 | 6.24E-05 | 0.000628 |
| Fdps      | -0.6424  | 6.22E-05 | 0.000626 |
| Nos3      | -0.32897 | 6.10E-05 | 0.000615 |
| 6330403Kl | -0.37605 | 6.04E-05 | 0.00061  |
| Katnal2   | -4.29498 | 5.60E-05 | 0.000568 |
| Rin2      | -0.43444 | 5.86E-05 | 0.000593 |
| Lama3     | -1.41901 | 5.76E-05 | 0.000582 |
| Tsypyl4   | -0.77646 | 5.76E-05 | 0.000582 |
| Slc7a2    | -1.20416 | 5.66E-05 | 0.000574 |
| Cpxm1     | -2.73365 | 5.44E-05 | 0.000553 |
| Higd1b    | -0.39869 | 5.71E-05 | 0.000578 |
| Gm5176    | -3.45775 | 5.37E-05 | 0.000547 |
| Ppp2r5a   | -0.30203 | 5.58E-05 | 0.000566 |
| Pdgfrb    | -0.40448 | 5.53E-05 | 0.000562 |
| Gm2238    | -2.23844 | 5.24E-05 | 0.000536 |
| Wasf3     | -0.53891 | 5.46E-05 | 0.000556 |
| Ncald     | -0.60855 | 5.42E-05 | 0.000552 |
| 0610009L1 | -1.06388 | 4.81E-05 | 0.000494 |
| Ache      | -2.00092 | 4.63E-05 | 0.000477 |
| Amotl1    | -0.30889 | 4.73E-05 | 0.000487 |
| Tsga10    | -1.07342 | 4.61E-05 | 0.000475 |
| Upf2      | -0.40833 | 4.62E-05 | 0.000476 |
| mt-Nd3    | -2.43618 | 4.34E-05 | 0.000449 |
| Max       | -0.3456  | 4.30E-05 | 0.000445 |
| Cd40      | -0.80619 | 4.24E-05 | 0.000439 |
| Tet1      | -1.01563 | 4.22E-05 | 0.000437 |
| Gmeb1     | -0.73074 | 4.13E-05 | 0.000429 |
| Myh10     | -0.48306 | 4.10E-05 | 0.000427 |
| Map3k13   | -1.88764 | 3.91E-05 | 0.000408 |
| Smarca2   | -0.29965 | 3.89E-05 | 0.000406 |
| Ncbp2     | -0.61342 | 3.84E-05 | 0.000401 |
| Ogt       | -0.31724 | 3.83E-05 | 0.000401 |
| Axin2     | -0.46766 | 3.80E-05 | 0.000397 |
| Sh3d19    | -0.71436 | 3.74E-05 | 0.000392 |
| P4ha1     | -0.49522 | 3.71E-05 | 0.00039  |
| Gm37589   | -1.48053 | 3.56E-05 | 0.000375 |
| Plekkg5   | -0.44172 | 3.51E-05 | 0.00037  |
| Clec16a   | -1.06168 | 3.41E-05 | 0.00036  |
| E130307A  | -1.27823 | 3.39E-05 | 0.000359 |
| Slc24a3   | -1.3027  | 3.40E-05 | 0.000359 |

|          |          |          |          |
|----------|----------|----------|----------|
| Golim4   | -0.25248 | 3.37E-05 | 0.000357 |
| Tmem191  | -0.97496 | 3.27E-05 | 0.000348 |
| Arhgef2  | -0.33552 | 3.28E-05 | 0.000348 |
| Gper1    | -0.56201 | 3.20E-05 | 0.00034  |
| Slx4     | -1.16028 | 3.12E-05 | 0.000333 |
| Gm42548  | -1.75721 | 3.05E-05 | 0.000326 |
| Map3k20  | -0.32709 | 3.12E-05 | 0.000333 |
| Gm9946   | -0.8989  | 3.02E-05 | 0.000324 |
| Pde4d    | -0.59402 | 3.04E-05 | 0.000325 |
| Amd1     | -0.48357 | 3.05E-05 | 0.000326 |
| Tprkb    | -0.52218 | 3.03E-05 | 0.000324 |
| Atp6v0a1 | -0.46372 | 3.03E-05 | 0.000324 |
| 2610035D | -1.30588 | 2.90E-05 | 0.000313 |
| Fhl2     | -0.89833 | 2.96E-05 | 0.000319 |
| Gipc3    | -0.68462 | 2.86E-05 | 0.000309 |
| Serp2    | -0.76335 | 2.81E-05 | 0.000304 |
| Vstm4    | -0.63945 | 2.75E-05 | 0.000298 |
| Traip    | -3.23179 | 2.56E-05 | 0.000278 |
| Pigg     | -1.0277  | 2.64E-05 | 0.000286 |
| Rbm5     | -0.30723 | 2.64E-05 | 0.000286 |
| Agap1    | -0.44273 | 2.63E-05 | 0.000285 |
| Eif3j2   | -2.30772 | 2.20E-05 | 0.000242 |
| Tppp3    | -0.79752 | 2.28E-05 | 0.00025  |
| Gfm2     | -0.97479 | 2.18E-05 | 0.00024  |
| Gm20634  | -2.54051 | 2.09E-05 | 0.000231 |
| Sipa1    | -0.3826  | 2.20E-05 | 0.000242 |
| Agfg1    | -0.3093  | 2.17E-05 | 0.000239 |
| Slc6a6   | -0.23532 | 2.10E-05 | 0.000232 |
| Trim56   | -0.40811 | 1.98E-05 | 0.00022  |
| Krt10    | -0.8813  | 1.94E-05 | 0.000215 |
| Trhde    | -21.4123 | 1.82E-05 | 0.000203 |
| Gm45809  | -2.43565 | 1.79E-05 | 0.0002   |
| Grk1     | -0.46335 | 1.85E-05 | 0.000206 |
| Gstm7    | -0.78586 | 1.78E-05 | 0.000199 |
| Shisal2b | -0.9228  | 1.74E-05 | 0.000194 |
| Zeb2     | -0.47617 | 1.76E-05 | 0.000196 |
| Homer1   | -1.13612 | 1.70E-05 | 0.00019  |
| Psmb10   | -0.37859 | 1.73E-05 | 0.000193 |
| Lhx2     | -0.72859 | 1.62E-05 | 0.000183 |
| Ap5z1    | -1.60983 | 1.51E-05 | 0.000171 |
| Agtpbp1  | -0.54331 | 1.54E-05 | 0.000174 |
| Tiam1    | -0.38175 | 1.53E-05 | 0.000173 |
| Asb2     | -2.03005 | 1.46E-05 | 0.000166 |
| Wdr18    | -0.74944 | 1.48E-05 | 0.000168 |
| Nadk2    | -0.67372 | 1.44E-05 | 0.000164 |
| Cspg4    | -0.50891 | 1.45E-05 | 0.000165 |
| Phf20l1  | -0.37082 | 1.44E-05 | 0.000164 |

|          |          |          |          |
|----------|----------|----------|----------|
| Gm42979  | -1.65428 | 1.22E-05 | 0.000141 |
| Tjp2     | -0.55546 | 1.27E-05 | 0.000146 |
| Gm25541  | -20.8573 | 1.18E-05 | 0.000138 |
| Gm42716  | -1.11653 | 1.19E-05 | 0.000138 |
| Ddx17    | -0.2965  | 1.20E-05 | 0.000139 |
| Son      | -0.19241 | 1.19E-05 | 0.000138 |
| mt-Tc    | -1.17813 | 1.13E-05 | 0.000132 |
| Inka1    | -0.54872 | 1.11E-05 | 0.00013  |
| Gab1     | -0.51048 | 1.09E-05 | 0.000128 |
| Mrln     | -3.52718 | 9.88E-06 | 0.000117 |
| Fam210a  | -0.90531 | 1.04E-05 | 0.000121 |
| Fbxl3    | -0.41248 | 1.05E-05 | 0.000123 |
| Idi1     | -0.83179 | 1.04E-05 | 0.000121 |
| Gnpat    | -0.72375 | 1.03E-05 | 0.000121 |
| Ppef2    | -1.13041 | 9.98E-06 | 0.000117 |
| Nr2f1    | -0.56313 | 1.00E-05 | 0.000118 |
| Khdrbs3  | -0.56038 | 9.89E-06 | 0.000117 |
| Ankrd29  | -1.23169 | 9.39E-06 | 0.000111 |
| Rem1     | -0.88437 | 9.46E-06 | 0.000112 |
| Tdrp     | -0.3931  | 8.07E-06 | 9.64E-05 |
| Rcvrn    | -0.31712 | 7.79E-06 | 9.34E-05 |
| Faim     | -0.38645 | 7.46E-06 | 8.96E-05 |
| Mir99ahg | -0.74454 | 7.34E-06 | 8.84E-05 |
| Hnrnpr   | -0.34132 | 7.13E-06 | 8.61E-05 |
| Ogfr     | -0.64035 | 6.82E-06 | 8.26E-05 |
| Ppp3cb   | -0.4619  | 6.83E-06 | 8.27E-05 |
| Gm44936  | -1.36954 | 6.23E-06 | 7.59E-05 |
| Gm43581  | -0.78131 | 6.43E-06 | 7.79E-05 |
| Rbms3    | -0.77038 | 6.43E-06 | 7.79E-05 |
| Gm47283  | -0.57019 | 6.38E-06 | 7.74E-05 |
| Shtn1    | -1.84593 | 5.97E-06 | 7.28E-05 |
| Trim65   | -0.74454 | 6.24E-06 | 7.59E-05 |
| Stk10    | -0.7576  | 5.89E-06 | 7.20E-05 |
| Ttc3     | -0.36723 | 5.89E-06 | 7.19E-05 |
| Tmem35a  | -1.77638 | 5.49E-06 | 6.74E-05 |
| Notch4   | -0.44896 | 5.66E-06 | 6.94E-05 |
| Irak1bp1 | -0.97452 | 5.42E-06 | 6.67E-05 |
| Dpp4     | -1.52719 | 5.22E-06 | 6.45E-05 |
| Kcnmb1   | -1.03455 | 5.25E-06 | 6.48E-05 |
| Cfap54   | -3.08678 | 4.96E-06 | 6.17E-05 |
| Cyp51    | -0.90277 | 5.10E-06 | 6.33E-05 |
| Irgm1    | -0.6375  | 5.15E-06 | 6.37E-05 |
| Kif5b    | -0.23723 | 5.14E-06 | 6.36E-05 |
| Tmem208  | -0.49216 | 4.96E-06 | 6.17E-05 |
| Efnb2    | -0.51707 | 4.56E-06 | 5.69E-05 |
| Map3k1   | -0.40824 | 4.53E-06 | 5.66E-05 |
| Mvk      | -0.93357 | 4.34E-06 | 5.43E-05 |

|          |          |          |          |
|----------|----------|----------|----------|
| Immt     | -0.42461 | 4.42E-06 | 5.53E-05 |
| Prph2    | -0.29377 | 4.15E-06 | 5.21E-05 |
| Scd2     | -0.47459 | 3.83E-06 | 4.82E-05 |
| Lef1     | -0.26358 | 3.79E-06 | 4.78E-05 |
| Rgs5     | -0.35591 | 3.79E-06 | 4.77E-05 |
| Plekhb1  | -0.46554 | 3.67E-06 | 4.62E-05 |
| 5031425E | -0.50534 | 3.61E-06 | 4.56E-05 |
| Eps8l2   | -0.85694 | 3.47E-06 | 4.41E-05 |
| Ldlrad3  | -0.43888 | 3.32E-06 | 4.23E-05 |
| Rgs4     | -0.55078 | 3.29E-06 | 4.19E-05 |
| Trim12c  | -0.70452 | 3.22E-06 | 4.12E-05 |
| Tmem97   | -1.08856 | 3.13E-06 | 4.01E-05 |
| Rnf213   | -0.53181 | 3.09E-06 | 3.96E-05 |
| Runx1t1  | -0.88826 | 3.08E-06 | 3.95E-05 |
| Faxc     | -22.013  | 2.63E-06 | 3.41E-05 |
| Cdk5rap2 | -0.90726 | 2.64E-06 | 3.42E-05 |
| Usp18    | -0.84318 | 2.66E-06 | 3.44E-05 |
| Slc9a3r2 | -0.25543 | 2.60E-06 | 3.39E-05 |
| Frzb     | -1.43569 | 2.38E-06 | 3.12E-05 |
| Gm49980  | -1.54437 | 2.36E-06 | 3.09E-05 |
| Rnaset2b | -0.86353 | 2.19E-06 | 2.89E-05 |
| Osbpl1a  | -0.37126 | 2.19E-06 | 2.89E-05 |
| Lgr5     | -3.77052 | 1.99E-06 | 2.64E-05 |
| Gm37033  | -0.52172 | 2.12E-06 | 2.80E-05 |
| Atp2b1   | -0.32255 | 2.13E-06 | 2.81E-05 |
| Trim25   | -0.52601 | 2.08E-06 | 2.76E-05 |
| Gbe1     | -0.58607 | 2.07E-06 | 2.75E-05 |
| mt-Td    | -2.32572 | 1.88E-06 | 2.50E-05 |
| Zic2     | -0.54482 | 1.88E-06 | 2.50E-05 |
| Adamts1  | -1.31426 | 1.70E-06 | 2.27E-05 |
| Clmn     | -1.47186 | 1.61E-06 | 2.16E-05 |
| Kcnv2    | -0.7391  | 1.50E-06 | 2.02E-05 |
| Cdk15    | -2.43335 | 1.40E-06 | 1.89E-05 |
| Rgs9bp   | -0.537   | 1.48E-06 | 1.99E-05 |
| Flrt2    | -0.88102 | 1.46E-06 | 1.97E-05 |
| Hnrnpm   | -0.34855 | 1.42E-06 | 1.93E-05 |
| Hspa9    | -0.44804 | 1.41E-06 | 1.91E-05 |
| Fxyd1    | -0.51704 | 1.40E-06 | 1.90E-05 |
| Nr3c1    | -0.31372 | 1.29E-06 | 1.76E-05 |
| Ets1     | -0.26851 | 1.26E-06 | 1.72E-05 |
| Ifit3b   | -0.96631 | 1.20E-06 | 1.64E-05 |
| Myl6     | -0.18256 | 1.21E-06 | 1.65E-05 |
| Stat1    | -0.55241 | 1.19E-06 | 1.63E-05 |
| Tspan13  | -0.3485  | 1.20E-06 | 1.64E-05 |
| Ivns1abp | -0.53112 | 1.17E-06 | 1.61E-05 |
| Ushbp1   | -0.40091 | 1.18E-06 | 1.62E-05 |
| Nfat5    | -0.33624 | 1.17E-06 | 1.61E-05 |



|           |          |          |          |
|-----------|----------|----------|----------|
| Ndrp2     | -0.48736 | 1.13E-06 | 1.56E-05 |
| Pdlim3    | -1.02189 | 1.08E-06 | 1.50E-05 |
| Ocln      | -0.34588 | 1.10E-06 | 1.52E-05 |
| Syne2     | -0.38859 | 1.02E-06 | 1.42E-05 |
| Rbp1      | -0.72056 | 9.81E-07 | 1.37E-05 |
| Smadcb1   | -0.60737 | 9.35E-07 | 1.30E-05 |
| Ulk4      | -1.08127 | 8.20E-07 | 1.15E-05 |
| Samd9l    | -0.49901 | 8.37E-07 | 1.18E-05 |
| Gm38336   | -22.0113 | 7.15E-07 | 1.01E-05 |
| Cxcl12    | -0.33752 | 7.78E-07 | 1.10E-05 |
| Rom1      | -0.30625 | 6.62E-07 | 9.42E-06 |
| Plk4      | -1.71629 | 5.92E-07 | 8.48E-06 |
| St13      | -0.37454 | 6.29E-07 | 8.96E-06 |
| Fam151b   | -2.93387 | 5.55E-07 | 7.96E-06 |
| Cox4i2    | -0.47299 | 6.12E-07 | 8.75E-06 |
| C030015A  | -3.09739 | 5.32E-07 | 7.66E-06 |
| Clstn1    | -0.32928 | 5.33E-07 | 7.66E-06 |
| Rs1       | -0.47213 | 4.66E-07 | 6.76E-06 |
| C130074G  | -0.40309 | 4.62E-07 | 6.71E-06 |
| Leo1      | -0.83729 | 4.07E-07 | 5.98E-06 |
| Fcgrt     | -0.32033 | 4.11E-07 | 6.02E-06 |
| Kmt5b     | -0.47977 | 4.06E-07 | 5.97E-06 |
| Tpm2      | -0.63553 | 3.94E-07 | 5.79E-06 |
| Epc2      | -0.58861 | 3.87E-07 | 5.72E-06 |
| S100a4    | -1.4522  | 3.63E-07 | 5.39E-06 |
| Plcd4     | -21.487  | 3.32E-07 | 4.96E-06 |
| Irag1     | -0.81534 | 3.59E-07 | 5.34E-06 |
| Rassf3    | -0.38081 | 3.66E-07 | 5.43E-06 |
| Gm40477   | -3.31153 | 3.19E-07 | 4.78E-06 |
| Msmo1     | -0.80104 | 3.54E-07 | 5.27E-06 |
| Grm7      | -4.07434 | 3.02E-07 | 4.54E-06 |
| E130218I0 | -0.60195 | 3.37E-07 | 5.02E-06 |
| Chordc1   | -0.57231 | 3.25E-07 | 4.86E-06 |
| Nuak1     | -0.89834 | 3.12E-07 | 4.69E-06 |
| Vwa3a     | -2.11339 | 2.95E-07 | 4.44E-06 |
| Itprid2   | -0.41    | 2.80E-07 | 4.22E-06 |
| Tnfrsf25  | -1.60272 | 2.26E-07 | 3.45E-06 |
| Pnpla6    | -0.64428 | 2.38E-07 | 3.62E-06 |
| Ap1ar     | -0.70841 | 2.33E-07 | 3.56E-06 |
| Cdkn2b    | -0.96726 | 2.08E-07 | 3.19E-06 |
| Abca8a    | -0.89924 | 2.03E-07 | 3.12E-06 |
| Pdgfb     | -0.32206 | 1.95E-07 | 3.01E-06 |
| Zfp469    | -21.1245 | 1.66E-07 | 2.57E-06 |
| Adamtsl2  | -1.87953 | 1.62E-07 | 2.52E-06 |
| Epc1      | -0.56401 | 1.67E-07 | 2.59E-06 |
| Fbln2     | -0.99944 | 1.63E-07 | 2.53E-06 |
| Fam169a   | -0.50381 | 1.59E-07 | 2.48E-06 |

|           |          |          |          |
|-----------|----------|----------|----------|
| Luc7l3    | -0.38841 | 1.40E-07 | 2.19E-06 |
| Kcna2     | -2.75976 | 1.17E-07 | 1.85E-06 |
| Rapgef2   | -0.43599 | 1.30E-07 | 2.05E-06 |
| Zbtb20    | -0.26964 | 1.29E-07 | 2.03E-06 |
| Ubtf      | -0.49494 | 1.06E-07 | 1.68E-06 |
| Mcc       | -0.43639 | 9.12E-08 | 1.45E-06 |
| Gm9917    | -0.96796 | 8.38E-08 | 1.34E-06 |
| Gm20045   | -1.66715 | 7.02E-08 | 1.13E-06 |
| Anxa5     | -0.31302 | 7.64E-08 | 1.23E-06 |
| Rida      | -0.9062  | 7.14E-08 | 1.15E-06 |
| Myo6      | -0.42754 | 6.76E-08 | 1.09E-06 |
| Ckb       | -0.38768 | 6.22E-08 | 1.01E-06 |
| Dpysl2    | -0.44329 | 6.18E-08 | 1.00E-06 |
| Bcl6b     | -1.01925 | 5.27E-08 | 8.60E-07 |
| Gm48207   | -1.2362  | 5.04E-08 | 8.24E-07 |
| mt-Co1    | -0.21584 | 4.42E-08 | 7.27E-07 |
| Snapc3    | -0.91847 | 4.20E-08 | 6.93E-07 |
| Pdc       | -0.33139 | 4.20E-08 | 6.93E-07 |
| Dll4      | -0.62545 | 4.07E-08 | 6.73E-07 |
| Rbm24     | -1.5871  | 3.69E-08 | 6.17E-07 |
| Sema5a    | -0.9368  | 3.57E-08 | 5.97E-07 |
| Sltm      | -0.44814 | 3.16E-08 | 5.30E-07 |
| Parm1     | -1.25718 | 3.05E-08 | 5.13E-07 |
| Chst2     | -0.78275 | 2.98E-08 | 5.02E-07 |
| Stard9    | -0.69492 | 3.04E-08 | 5.10E-07 |
| Rasgrp2   | -0.48432 | 2.88E-08 | 4.86E-07 |
| Slc5a5    | -21.778  | 2.43E-08 | 4.14E-07 |
| BC051408  | -3.39527 | 2.33E-08 | 3.99E-07 |
| Rmdn2     | -1.74952 | 2.47E-08 | 4.22E-07 |
| Septin11  | -0.42288 | 2.54E-08 | 4.33E-07 |
| Layn      | -0.93491 | 2.31E-08 | 3.97E-07 |
| Irf9      | -0.59391 | 2.33E-08 | 3.99E-07 |
| Jade1     | -0.57378 | 2.34E-08 | 4.01E-07 |
| Rgl1      | -0.5606  | 2.04E-08 | 3.53E-07 |
| Arg2      | -2.87634 | 1.65E-08 | 2.87E-07 |
| Cap2      | -1.76513 | 1.37E-08 | 2.39E-07 |
| Ltbp1     | -1.24111 | 1.44E-08 | 2.51E-07 |
| E130114P1 | -1.27117 | 1.39E-08 | 2.42E-07 |
| Slc38a11  | -0.80811 | 1.31E-08 | 2.30E-07 |
| Atxn1     | -0.57206 | 1.28E-08 | 2.24E-07 |
| Ankrd37   | -0.63167 | 1.20E-08 | 2.11E-07 |
| Pcp4l1    | -0.31497 | 1.19E-08 | 2.10E-07 |
| Msrp2     | -0.98061 | 1.12E-08 | 1.99E-07 |
| Far2      | -0.97091 | 9.90E-09 | 1.76E-07 |
| Pkm       | -0.26923 | 8.97E-09 | 1.60E-07 |
| Ndufa4l2  | -0.55172 | 8.84E-09 | 1.58E-07 |
| Gt(ROSA)2 | -0.70951 | 8.48E-09 | 1.52E-07 |

|          |          |          |          |
|----------|----------|----------|----------|
| Gm48204  | -1.18447 | 8.05E-09 | 1.45E-07 |
| A530083N | -0.80449 | 7.52E-09 | 1.36E-07 |
| Zdhhc6   | -0.70535 | 7.37E-09 | 1.33E-07 |
| Atp13a5  | -1.09005 | 7.01E-09 | 1.27E-07 |
| Dync1li2 | -0.57581 | 7.12E-09 | 1.29E-07 |
| Rassf8   | -0.75825 | 6.64E-09 | 1.21E-07 |
| Tek      | -0.33065 | 6.79E-09 | 1.23E-07 |
| Gm17750  | -1.64369 | 5.63E-09 | 1.03E-07 |
| Akap12   | -0.40315 | 6.25E-09 | 1.14E-07 |
| Colec12  | -0.75313 | 5.82E-09 | 1.07E-07 |
| Akr1c14  | -1.37347 | 5.19E-09 | 9.61E-08 |
| Atp1b2   | -0.47666 | 5.54E-09 | 1.02E-07 |
| Prickle1 | -0.66746 | 5.40E-09 | 9.98E-08 |
| Gpr27    | -2.22523 | 3.33E-09 | 6.29E-08 |
| Thra     | -0.42263 | 3.56E-09 | 6.69E-08 |
| Gbp9     | -0.70286 | 3.38E-09 | 6.36E-08 |
| Hsp90ab1 | -0.21044 | 3.35E-09 | 6.31E-08 |
| Fam102a  | -1.09673 | 2.88E-09 | 5.47E-08 |
| Six3os1  | -1.35187 | 2.74E-09 | 5.23E-08 |
| Sntb1    | -1.26906 | 2.75E-09 | 5.24E-08 |
| Pde6g    | -0.35244 | 2.83E-09 | 5.38E-08 |
| Sox4     | -0.70542 | 2.42E-09 | 4.62E-08 |
| Sesn3    | -0.64027 | 2.11E-09 | 4.08E-08 |
| Arntl    | -1.06619 | 1.76E-09 | 3.41E-08 |
| Ablim1   | -0.26915 | 1.75E-09 | 3.40E-08 |
| Gpc6     | -0.93383 | 1.62E-09 | 3.16E-08 |
| Trim12a  | -0.77814 | 1.50E-09 | 2.96E-08 |
| Pde5a    | -0.65209 | 1.42E-09 | 2.82E-08 |
| Tril     | -0.61627 | 1.39E-09 | 2.76E-08 |
| Car4     | -0.84722 | 1.28E-09 | 2.56E-08 |
| Heyl     | -1.04481 | 1.19E-09 | 2.37E-08 |
| Lars2    | -0.39364 | 1.13E-09 | 2.26E-08 |
| Lsamp    | -0.9649  | 1.01E-09 | 2.04E-08 |
| mt-Ta    | -1.84482 | 7.99E-10 | 1.62E-08 |
| Lhfpl2   | -0.74186 | 9.14E-10 | 1.84E-08 |
| Ap4s1    | -0.73753 | 8.60E-10 | 1.74E-08 |
| Mmp15    | -0.86111 | 7.45E-10 | 1.51E-08 |
| Col3a1   | -1.68319 | 6.50E-10 | 1.33E-08 |
| Ajap1    | -1.1896  | 6.94E-10 | 1.42E-08 |
| Cd83     | -1.56953 | 6.11E-10 | 1.26E-08 |
| Ccdc80   | -1.41181 | 6.04E-10 | 1.24E-08 |
| Lingo1   | -21.8813 | 4.20E-10 | 8.77E-09 |
| Dhcr24   | -1.36548 | 4.48E-10 | 9.31E-09 |
| Slc16a1  | -0.37556 | 5.03E-10 | 1.04E-08 |
| Gbp7     | -0.59603 | 4.47E-10 | 9.30E-09 |
| mt-Co2   | -0.89956 | 2.90E-10 | 6.07E-09 |
| Jup      | -0.57921 | 2.41E-10 | 5.07E-09 |

|           |          |          |          |
|-----------|----------|----------|----------|
| Slc39a10  | -0.30813 | 2.22E-10 | 4.71E-09 |
| A930006Kl | -1.59207 | 1.79E-10 | 3.83E-09 |
| Nfia      | -0.44791 | 2.05E-10 | 4.35E-09 |
| Gm48203   | -2.24505 | 1.50E-10 | 3.24E-09 |
| Islr2     | -0.57697 | 1.78E-10 | 3.80E-09 |
| Vtn       | -0.56153 | 1.56E-10 | 3.36E-09 |
| Ctsh      | -0.42518 | 1.38E-10 | 2.98E-09 |
| Lrrn3     | -0.90312 | 1.26E-10 | 2.73E-09 |
| Ntn4      | -1.0117  | 1.02E-10 | 2.24E-09 |
| Prr5l     | -0.83382 | 9.13E-11 | 2.00E-09 |
| Reck      | -0.50705 | 9.06E-11 | 1.99E-09 |
| Car2      | -0.53204 | 7.29E-11 | 1.61E-09 |
| Dapl1     | -0.80885 | 6.23E-11 | 1.39E-09 |
| Oasl2     | -0.73722 | 4.20E-11 | 9.44E-10 |
| Pdxk      | -0.58342 | 4.14E-11 | 9.34E-10 |
| Gm37642   | -2.36342 | 3.19E-11 | 7.32E-10 |
| Srsf1     | -0.55734 | 3.67E-11 | 8.31E-10 |
| Rnaset2a  | -0.83028 | 3.50E-11 | 7.96E-10 |
| Kdr       | -0.39526 | 3.61E-11 | 8.18E-10 |
| Ptprm     | -0.55372 | 3.27E-11 | 7.48E-10 |
| Stard4    | -0.83397 | 3.28E-11 | 7.50E-10 |
| Ifi27l2a  | -1.9014  | 2.60E-11 | 6.00E-10 |
| Olfr558   | -1.60982 | 2.57E-11 | 5.95E-10 |
| mt-Co3    | -0.7088  | 2.61E-11 | 6.01E-10 |
| Sfxn5     | -1.07739 | 2.15E-11 | 4.98E-10 |
| Gm37393   | -0.99009 | 2.00E-11 | 4.65E-10 |
| Gnat1     | -0.34167 | 2.16E-11 | 5.01E-10 |
| Ralgapa1  | -0.4961  | 1.71E-11 | 3.99E-10 |
| Olfml2a   | -1.43013 | 1.09E-11 | 2.61E-10 |
| Phldb2    | -0.64629 | 1.11E-11 | 2.64E-10 |
| Gtf2i     | -0.51777 | 1.08E-11 | 2.59E-10 |
| Abcc9     | -0.65417 | 1.02E-11 | 2.45E-10 |
| Cryab     | -0.67754 | 6.51E-12 | 1.58E-10 |
| H2bu2     | -0.90023 | 6.22E-12 | 1.51E-10 |
| Marcks    | -0.52297 | 5.21E-12 | 1.28E-10 |
| Klf12     | -0.78602 | 4.02E-12 | 1.01E-10 |
| Fzd6      | -0.54277 | 4.31E-12 | 1.07E-10 |
| Hnrnpa2b1 | -0.34165 | 4.26E-12 | 1.06E-10 |
| Palmd     | -0.45614 | 4.18E-12 | 1.04E-10 |
| Slc16a2   | -0.65864 | 3.69E-12 | 9.28E-11 |
| Nrep      | -1.04741 | 2.34E-12 | 5.93E-11 |
| Ppp1r16b  | -0.7509  | 2.31E-12 | 5.87E-11 |
| Tagln     | -1.65452 | 1.08E-12 | 2.79E-11 |
| Ifnar1    | -0.5494  | 1.17E-12 | 3.03E-11 |
| Isyna1    | -0.64801 | 8.59E-13 | 2.24E-11 |
| Insig1    | -1.13768 | 4.33E-13 | 1.16E-11 |
| Slc38a3   | -0.62695 | 3.51E-13 | 9.41E-12 |

|            |          |          |          |
|------------|----------|----------|----------|
| Gm48206    | -4.06115 | 1.23E-13 | 3.38E-12 |
| Srsf3      | -0.43107 | 1.12E-13 | 3.09E-12 |
| St6galnac3 | -0.66037 | 1.00E-13 | 2.77E-12 |
| Prom1      | -0.44586 | 8.41E-14 | 2.35E-12 |
| Eno1       | -0.52831 | 7.30E-14 | 2.05E-12 |
| Sp100      | -0.66245 | 6.82E-14 | 1.92E-12 |
| Gm42892    | -0.93536 | 5.52E-14 | 1.57E-12 |
| Srebf2     | -0.85279 | 5.47E-14 | 1.56E-12 |
| Ret        | -2.80566 | 3.22E-14 | 9.33E-13 |
| Plekhh2    | -1.27479 | 3.59E-14 | 1.04E-12 |
| Mfsd2a     | -0.62532 | 3.99E-14 | 1.15E-12 |
| Slc16a4    | -0.89447 | 3.04E-14 | 8.82E-13 |
| Irf7       | -0.87947 | 2.99E-14 | 8.68E-13 |
| Ifit1      | -0.8966  | 2.48E-14 | 7.26E-13 |
| Stra6      | -0.64777 | 2.53E-14 | 7.39E-13 |
| Notum      | -1.49744 | 1.76E-14 | 5.23E-13 |
| Hnrnph1    | -0.51252 | 2.30E-14 | 6.74E-13 |
| Rasgrp3    | -0.60292 | 2.15E-14 | 6.32E-13 |
| Mgarp      | -0.60889 | 1.52E-14 | 4.54E-13 |
| Mpzl1      | -0.5241  | 1.27E-14 | 3.82E-13 |
| Sorbs2     | -0.44425 | 1.11E-14 | 3.33E-13 |
| Ackr3      | -0.90257 | 7.78E-15 | 2.35E-13 |
| Fam181b    | -1.088   | 6.97E-15 | 2.13E-13 |
| Pcdh18     | -1.03105 | 6.24E-15 | 1.92E-13 |
| Cyp26b1    | -1.43574 | 5.10E-15 | 1.57E-13 |
| Htra3      | -1.36037 | 4.24E-15 | 1.32E-13 |
| Sag        | -0.46441 | 4.26E-15 | 1.32E-13 |
| Cobll1     | -0.58376 | 2.94E-15 | 9.26E-14 |
| Ano1       | -1.04935 | 1.81E-15 | 5.74E-14 |
| Gm20559    | -1.07647 | 1.31E-15 | 4.19E-14 |
| Ifit3      | -1.26298 | 9.88E-16 | 3.19E-14 |
| Myo10      | -0.52182 | 1.03E-15 | 3.32E-14 |
| Lbh        | -0.88554 | 9.42E-16 | 3.06E-14 |
| Isg15      | -0.81051 | 6.24E-16 | 2.05E-14 |
| Aif1l      | -0.95647 | 5.17E-16 | 1.71E-14 |
| Hsp90aa1   | -0.4242  | 4.58E-16 | 1.53E-14 |
| Frmd4b     | -0.68985 | 1.45E-16 | 4.96E-15 |
| Fkbp4      | -0.71136 | 1.12E-16 | 3.85E-15 |
| Jcad       | -0.41221 | 1.14E-16 | 3.91E-15 |
| Il10rb     | -0.61863 | 1.03E-16 | 3.55E-15 |
| Cacybp     | -0.74943 | 9.40E-17 | 3.26E-15 |
| MyI9       | -0.7406  | 7.69E-17 | 2.68E-15 |
| Acta2      | -1.6128  | 4.48E-17 | 1.58E-15 |
| Gbp3       | -0.88658 | 2.01E-17 | 7.25E-16 |
| Unc5b      | -0.94788 | 1.63E-17 | 5.91E-16 |
| Dnaja1     | -0.58065 | 9.78E-18 | 3.62E-16 |
| Rtp4       | -0.99644 | 7.13E-18 | 2.68E-16 |

|           |          |          |          |
|-----------|----------|----------|----------|
| Dgkb      | -1.41361 | 2.97E-18 | 1.13E-16 |
| Pmepa1    | -0.68113 | 2.75E-18 | 1.05E-16 |
| Abhd2     | -0.56807 | 2.43E-18 | 9.35E-17 |
| Map4k2    | -0.88134 | 1.33E-18 | 5.21E-17 |
| Tuba1a    | -0.57118 | 1.70E-18 | 6.61E-17 |
| Plip      | -0.72981 | 9.65E-19 | 3.85E-17 |
| Tnfrsf19  | -0.74969 | 8.29E-19 | 3.33E-17 |
| mt-Atp6   | -0.62854 | 3.08E-19 | 1.27E-17 |
| Lmo7      | -0.98109 | 2.89E-19 | 1.20E-17 |
| Xaf1      | -0.80301 | 1.83E-19 | 7.64E-18 |
| Sgpp2     | -1.09266 | 1.40E-19 | 5.90E-18 |
| Trpc3     | -1.33212 | 9.65E-20 | 4.11E-18 |
| Gm15666   | -1.6023  | 6.27E-20 | 2.73E-18 |
| Bok       | -1.11215 | 7.14E-20 | 3.08E-18 |
| mt-Atp8   | -0.66315 | 3.82E-20 | 1.71E-18 |
| Aspn      | -1.06554 | 1.80E-20 | 8.12E-19 |
| Gngt1     | -0.49851 | 1.09E-20 | 4.98E-19 |
| Lrrc49    | -1.08849 | 3.53E-21 | 1.66E-19 |
| Rho       | -0.38934 | 1.22E-21 | 5.82E-20 |
| Fut8      | -0.7679  | 8.69E-22 | 4.15E-20 |
| Gas6      | -0.76797 | 8.21E-23 | 4.08E-21 |
| Rflnb     | -0.75439 | 6.41E-23 | 3.22E-21 |
| Ptprb     | -0.37723 | 2.22E-23 | 1.14E-21 |
| Ldlr      | -1.66048 | 6.71E-24 | 3.50E-22 |
| Nrp1      | -0.72949 | 6.31E-24 | 3.34E-22 |
| Cmpk2     | -1.56427 | 2.08E-24 | 1.13E-22 |
| Macf1     | -0.50067 | 3.24E-24 | 1.74E-22 |
| Slc22a8   | -0.96113 | 1.02E-24 | 5.63E-23 |
| Emp2      | -0.83959 | 1.01E-24 | 5.57E-23 |
| Hsph1     | -1.86377 | 2.35E-25 | 1.33E-23 |
| Ddc       | -2.00634 | 7.44E-26 | 4.29E-24 |
| Cst3      | -0.50706 | 1.57E-25 | 8.98E-24 |
| St8sia4   | -0.9701  | 6.35E-26 | 3.69E-24 |
| Grb14     | -1.05087 | 5.41E-26 | 3.16E-24 |
| mt-Nd5    | -0.53727 | 9.43E-26 | 5.41E-24 |
| Vegfc     | -1.97333 | 1.82E-26 | 1.09E-24 |
| Rsrp1     | -0.60219 | 6.03E-26 | 3.51E-24 |
| Tmtc2     | -1.04024 | 1.31E-26 | 7.96E-25 |
| Dynll1    | -0.52643 | 2.23E-26 | 1.32E-24 |
| Rsad2     | -1.51265 | 3.56E-28 | 2.27E-26 |
| Mndal     | -1.02133 | 4.30E-28 | 2.72E-26 |
| Slc40a1   | -1.03343 | 1.32E-28 | 8.58E-27 |
| Rn18s-rs5 | -0.51912 | 3.80E-28 | 2.41E-26 |
| Kitl      | -0.64171 | 4.10E-29 | 2.75E-27 |
| Flt1      | -0.42835 | 1.55E-29 | 1.06E-27 |
| Ifi203    | -1.05372 | 1.94E-32 | 1.40E-30 |
| Slco1c1   | -0.73675 | 3.19E-33 | 2.38E-31 |

|         |          |           |           |
|---------|----------|-----------|-----------|
| Atp1a2  | -1.07075 | 5.42E-34  | 4.14E-32  |
| Rlbp1   | -1.14051 | 2.18E-34  | 1.70E-32  |
| Utrn    | -0.68833 | 3.44E-39  | 3.18E-37  |
| Ecm2    | -1.84446 | 1.35E-41  | 1.39E-39  |
| Nes     | -1.18206 | 2.17E-42  | 2.34E-40  |
| mt-Nd1  | -0.50332 | 4.63E-46  | 5.72E-44  |
| Esyt2   | -0.90057 | 1.23E-46  | 1.54E-44  |
| Gkn3    | -4.39254 | 3.05E-50  | 4.47E-48  |
| Gm28438 | -0.87838 | 9.17E-49  | 1.27E-46  |
| Lrp8    | -1.08881 | 2.19E-51  | 3.48E-49  |
| Ctnnb1  | -0.71747 | 7.68E-52  | 1.24E-49  |
| Spc25   | -1.53227 | 3.32E-54  | 5.65E-52  |
| Ndnf    | -2.43333 | 9.48E-63  | 2.06E-60  |
| Hmcn1   | -1.49489 | 2.03E-61  | 4.29E-59  |
| Pltp    | -0.68436 | 3.78E-60  | 7.75E-58  |
| Tfrc    | -1.49845 | 7.30E-65  | 1.71E-62  |
| mt-Nd4  | -0.73441 | 4.25E-69  | 1.20E-66  |
| mt-Nd2  | -0.75983 | 2.52E-82  | 9.20E-80  |
| mt-Cytb | -0.68936 | 1.92E-90  | 8.45E-88  |
| Spock2  | -1.0619  | 5.35E-92  | 2.43E-89  |
| Alpl    | -1.98376 | 2.63E-110 | 1.71E-107 |
| mt-Rnr1 | -0.94718 | 1.72E-106 | 1.07E-103 |
| Bsg     | -1.03047 | 4.53E-106 | 2.71E-103 |
| Slc7a1  | -1.59788 | 1.54E-115 | 1.35E-112 |
| mt-Rnr2 | -0.92427 | 3.72E-116 | 3.48E-113 |
| Ptn     | -1.89521 | 1.42E-160 | 2.36E-157 |
| Ltbp4   | -2.04777 | 5.09E-188 | 1.52E-184 |
