# Supplementary material
Source: publisher figshare collection journal article supplement (https://diabetesjournals.figshare.com/articles/dataset/_/24550435)
Supplement: Supplementary file 4 [file 1]

|                   | Description                                    | GeneRatio | BgRatio   | qvalue      |
|-------------------|------------------------------------------------|-----------|-----------|-------------|
| <b>GO:1904018</b> | positive regulation of vasculature development | 25/446    | 204/23210 | 4.17E-11    |
| <b>GO:0061154</b> | endothelial tube morphogenesis                 | 5/446     | 16/23210  | 0.000125858 |
| <b>GO:0007219</b> | Notch signaling pathway                        | 13/446    | 177/23210 | 0.000397328 |

**topgene**

Vegfc/Ctsh/Efnb2/Tmem100/Tek/Flt1/Gata2/Plk2/Anxa3/Acvrl1/Klf4/Hspb1/Jcad/Nos3/Cx3cl1/Rapgef2/Ptgis/As  
DII4/Acvrl1/Ctnnb1/Alox12/Rhoa  
Hey1/Tmem100/Jag2/DII4/Tgfb2/Gata2/App/Jag1/Kctd10/Notch1/Ift172/Reck/Hhex

b4/Tie1/Cdh5/Notch1/Pdgfd/Rras/Ceacam1/Pak4
