# Supplementary material
Source: publisher figshare collection journal article supplement (https://diabetesjournals.figshare.com/articles/dataset/_/24550435)
Supplement: Supplementary file 5 [file 1]

| Gene     | avg_log2F | p-value   | adjusted p-value |
|----------|-----------|-----------|------------------|
| Ctla2a   | 4.042716  | 7.83E-197 | 7.83E-197        |
| Pim3     | 2.903083  | 2.36E-114 | 2.36E-114        |
| Lrg1     | 8.211193  | 4.16E-104 | 4.16E-104        |
| Tmsb10   | 2.372064  | 6.00E-90  | 6.00E-90         |
| Cd200    | 1.85775   | 1.02E-75  | 1.02E-75         |
| Ch25h    | 4.191617  | 1.31E-69  | 1.31E-69         |
| Igfbp7   | 1.320814  | 4.58E-55  | 4.58E-55         |
| Tshz2    | 2.050264  | 3.70E-59  | 3.70E-59         |
| Cebpd    | 2.233083  | 1.30E-57  | 1.30E-57         |
| Galnt15  | 2.751358  | 1.15E-52  | 1.15E-52         |
| Fos      | 2.081497  | 6.88E-48  | 6.88E-48         |
| Ccn1     | 2.20859   | 5.47E-48  | 5.47E-48         |
| Fth1     | 1.215153  | 1.34E-47  | 1.34E-47         |
| Cpe      | 1.848506  | 1.17E-45  | 1.17E-45         |
| Slc38a5  | 5.391427  | 1.52E-45  | 1.52E-45         |
| Tmem252  | 1.611375  | 1.30E-43  | 1.30E-43         |
| Ier3     | 1.93784   | 2.34E-44  | 2.34E-44         |
| Fnbp1l   | 1.559891  | 4.46E-42  | 4.46E-42         |
| Scgb3a1  | 4.399687  | 3.38E-42  | 3.38E-42         |
| Lcn2     | 5.324215  | 3.97E-40  | 3.97E-40         |
| Hmgcs2   | 1.846254  | 7.54E-40  | 7.54E-40         |
| Egr1     | 2.203278  | 6.97E-40  | 6.97E-40         |
| Tmem176b | 2.368478  | 3.97E-40  | 3.97E-40         |
| Vwf      | 1.778635  | 2.12E-39  | 2.12E-39         |
| Rps16    | 0.976511  | 1.34E-35  | 1.34E-35         |
| Mgp      | 1.567513  | 6.42E-36  | 6.42E-36         |
| Paqr5    | 1.416567  | 1.70E-35  | 1.70E-35         |
| Ifitm1   | 3.594958  | 6.63E-37  | 6.63E-37         |
| Nid1     | 2.302207  | 1.14E-36  | 1.14E-36         |
| Rps11    | 0.975422  | 9.13E-34  | 9.13E-34         |
| Slc3a2   | 1.16886   | 2.89E-34  | 2.89E-34         |
| Slc7a5   | 1.447072  | 5.63E-35  | 5.63E-35         |
| Ccdc141  | 1.605416  | 6.65E-35  | 6.65E-35         |
| Rpl18a   | 0.905583  | 1.77E-33  | 1.77E-33         |
| Zfp36l2  | 1.635154  | 7.13E-34  | 7.13E-34         |
| Serpib6b | 3.019039  | 2.64E-34  | 2.64E-34         |
| Rpl39    | 0.937469  | 1.69E-31  | 1.69E-31         |
| Junb     | 1.513266  | 1.26E-31  | 1.26E-31         |
| Ucp2     | 1.331202  | 4.69E-32  | 4.69E-32         |
| Rpl23    | 0.865059  | 6.06E-31  | 6.06E-31         |
| Ccn2     | 2.91847   | 1.16E-32  | 1.16E-32         |
| Dusp2    | 3.380734  | 3.02E-32  | 3.02E-32         |
| Xdh      | 1.755823  | 4.29E-31  | 4.29E-31         |
| Acer2    | 1.283959  | 1.29E-29  | 1.29E-29         |
| Nr2f2    | 2.461303  | 1.83E-30  | 1.83E-30         |
| Tmem176l | 1.636448  | 9.12E-30  | 9.12E-30         |

|                  |          |          |          |
|------------------|----------|----------|----------|
| <b>Eef1a1</b>    | 0.766459 | 1.81E-28 | 1.81E-28 |
| <b>Rps28</b>     | 0.964393 | 6.94E-29 | 6.94E-29 |
| <b>Icam1</b>     | 3.256421 | 4.72E-29 | 4.72E-29 |
| <b>Il4ra</b>     | 2.547856 | 1.49E-28 | 1.49E-28 |
| <b>Rpl32</b>     | 0.829523 | 1.18E-26 | 1.18E-26 |
| <b>Socs3</b>     | 1.802413 | 1.25E-27 | 1.25E-27 |
| <b>Rpl17</b>     | 0.802913 | 1.21E-26 | 1.21E-26 |
| <b>Rpl38</b>     | 0.791326 | 1.56E-26 | 1.56E-26 |
| <b>Bmpr2</b>     | 0.949872 | 1.83E-26 | 1.83E-26 |
| <b>Tbc1d4</b>    | 1.589344 | 2.45E-27 | 2.45E-27 |
| <b>Fam110d</b>   | 1.296316 | 6.66E-27 | 6.66E-27 |
| <b>Cfh</b>       | 1.712266 | 2.81E-27 | 2.81E-27 |
| <b>Spry1</b>     | 1.894183 | 6.09E-27 | 6.09E-27 |
| <b>Tgm2</b>      | 1.417798 | 2.28E-26 | 2.28E-26 |
| <b>Kcnj8</b>     | 3.477799 | 1.56E-26 | 1.56E-26 |
| <b>Fkbp5</b>     | 2.652022 | 8.63E-26 | 8.63E-26 |
| <b>Litaf</b>     | 2.225611 | 1.36E-25 | 1.36E-25 |
| <b>Pmaip1</b>    | 1.881103 | 1.33E-25 | 1.33E-25 |
| <b>Rpl12</b>     | 0.874016 | 1.52E-24 | 1.52E-24 |
| <b>Fam117b</b>   | 1.764912 | 7.51E-25 | 7.51E-25 |
| <b>Zbtb16</b>    | 2.640851 | 4.80E-25 | 4.80E-25 |
| <b>Jun</b>       | 1.150726 | 3.79E-24 | 3.79E-24 |
| <b>Atf3</b>      | 1.991691 | 6.66E-25 | 6.66E-25 |
| <b>Fosb</b>      | 1.587796 | 1.72E-24 | 1.72E-24 |
| <b>Qsox1</b>     | 1.777251 | 1.78E-24 | 1.78E-24 |
| <b>Lipa</b>      | 1.426771 | 5.21E-24 | 5.21E-24 |
| <b>Kbtbd11</b>   | 1.533258 | 1.20E-23 | 1.20E-23 |
| <b>Zfp36</b>     | 1.264773 | 1.80E-23 | 1.80E-23 |
| <b>Gjc1</b>      | 1.423708 | 1.20E-23 | 1.20E-23 |
| <b>Tnfrsf9</b>   | 26.51517 | 1.83E-23 | 1.83E-23 |
| <b>Rps8</b>      | 0.643084 | 6.71E-23 | 6.71E-23 |
| <b>Jund</b>      | 0.982992 | 4.93E-23 | 4.93E-23 |
| <b>Nfkbia</b>    | 0.886834 | 8.36E-23 | 8.36E-23 |
| <b>Atp8b1</b>    | 2.469112 | 1.20E-23 | 1.20E-23 |
| <b>Sh2d3c</b>    | 2.438763 | 1.20E-23 | 1.20E-23 |
| <b>Rps19</b>     | 0.803908 | 1.39E-22 | 1.39E-22 |
| <b>Rpl36</b>     | 0.727457 | 1.66E-22 | 1.66E-22 |
| <b>Hspb8</b>     | 2.754847 | 2.46E-23 | 2.46E-23 |
| <b>Rack1</b>     | 0.810684 | 3.83E-22 | 3.83E-22 |
| <b>Rpl13</b>     | 0.690599 | 4.28E-22 | 4.28E-22 |
| <b>Plac9a</b>    | 1.8961   | 6.76E-23 | 6.76E-23 |
| <b>Rpl19</b>     | 0.754012 | 7.82E-22 | 7.82E-22 |
| <b>Fau</b>       | 0.681412 | 1.25E-21 | 1.25E-21 |
| <b>Serpina3n</b> | 4.776094 | 1.94E-22 | 1.94E-22 |
| <b>Abcc9</b>     | 2.220598 | 1.32E-22 | 1.32E-22 |
| <b>Hif1a</b>     | 1.290799 | 5.59E-22 | 5.59E-22 |
| <b>Rps15</b>     | 0.697378 | 2.44E-21 | 2.44E-21 |

|          |          |          |          |
|----------|----------|----------|----------|
| Angptl4  | 1.823993 | 7.82E-22 | 7.82E-22 |
| Aoc3     | 3.182786 | 5.82E-22 | 5.82E-22 |
| Rpl37    | 0.674017 | 5.59E-21 | 5.59E-21 |
| Rnase4   | 1.97569  | 8.45E-22 | 8.45E-22 |
| Rpl10    | 0.759458 | 6.57E-21 | 6.57E-21 |
| Ackr1    | 4.967197 | 3.24E-21 | 3.24E-21 |
| Casq2    | 2.25441  | 2.16E-21 | 2.16E-21 |
| Slc2a1   | 0.591817 | 3.00E-20 | 3.00E-20 |
| Rps15a   | 0.746825 | 2.04E-20 | 2.04E-20 |
| Lgmn     | 2.025605 | 4.21E-21 | 4.21E-21 |
| Gmpr     | 3.00062  | 3.84E-21 | 3.84E-21 |
| Slc29a1  | 2.297663 | 5.27E-21 | 5.27E-21 |
| Rpl18    | 0.797192 | 3.18E-20 | 3.18E-20 |
| Rpl28    | 0.656569 | 3.12E-20 | 3.12E-20 |
| Rps24    | 0.648325 | 7.34E-20 | 7.34E-20 |
| Ahnak    | 0.836847 | 7.35E-20 | 7.35E-20 |
| H3f3b    | 0.653646 | 1.62E-19 | 1.62E-19 |
| Vtn      | 1.420335 | 2.43E-20 | 2.43E-20 |
| Gpr146   | 1.22776  | 8.25E-20 | 8.25E-20 |
| Rps20    | 0.721251 | 1.95E-19 | 1.95E-19 |
| Gatm     | 1.664338 | 7.07E-20 | 7.07E-20 |
| Mgat4a   | 3.065414 | 7.56E-20 | 7.56E-20 |
| Rps5     | 0.679811 | 4.17E-19 | 4.17E-19 |
| Rps6     | 0.852051 | 3.15E-19 | 3.15E-19 |
| Pdgfrb   | 2.093975 | 1.45E-19 | 1.45E-19 |
| Il1r1    | 2.416408 | 1.53E-19 | 1.53E-19 |
| Il6ra    | 3.198746 | 3.32E-19 | 3.32E-19 |
| Rps4x    | 0.662038 | 2.45E-18 | 2.45E-18 |
| Ggt5     | 3.979345 | 1.23E-18 | 1.23E-18 |
| Dusp23   | 2.356236 | 1.02E-18 | 1.02E-18 |
| Rpl22    | 0.741852 | 4.71E-18 | 4.71E-18 |
| Ptgfrn   | 2.227305 | 9.24E-19 | 9.24E-19 |
| Adm      | 2.992493 | 1.32E-18 | 1.32E-18 |
| Tpt1     | 0.521839 | 7.61E-18 | 7.61E-18 |
| Adgrl3   | 2.227345 | 1.62E-18 | 1.62E-18 |
| Rplp0    | 0.897089 | 5.21E-18 | 5.21E-18 |
| Cd302    | 2.973596 | 2.13E-18 | 2.13E-18 |
| Mcf2l    | 1.13287  | 4.65E-18 | 4.65E-18 |
| Cdc42ep4 | 1.718211 | 3.13E-18 | 3.13E-18 |
| Abca1    | 1.974106 | 2.50E-18 | 2.50E-18 |
| Rpl3     | 0.741678 | 8.15E-18 | 8.15E-18 |
| Xbp1     | 1.359137 | 5.51E-18 | 5.51E-18 |
| Rps7     | 0.768162 | 1.08E-17 | 1.08E-17 |
| P2ry14   | 2.919795 | 3.52E-18 | 3.52E-18 |
| Ctdspl   | 3.032107 | 4.77E-18 | 4.77E-18 |
| Rpl14    | 0.784124 | 2.04E-17 | 2.04E-17 |
| Rpl35a   | 0.611704 | 2.18E-17 | 2.18E-17 |

|                  |          |          |          |
|------------------|----------|----------|----------|
| <b>Rps14</b>     | 0.606633 | 3.38E-17 | 3.38E-17 |
| <b>Adap2</b>     | 3.10233  | 6.29E-18 | 6.29E-18 |
| <b>Ace2</b>      | 3.41784  | 6.44E-18 | 6.44E-18 |
| <b>Id1</b>       | 0.758899 | 2.56E-17 | 2.56E-17 |
| <b>Cd59a</b>     | 0.970035 | 2.55E-17 | 2.55E-17 |
| <b>Cygb</b>      | 2.696005 | 1.05E-17 | 1.05E-17 |
| <b>Tacc1</b>     | 1.011893 | 4.57E-17 | 4.57E-17 |
| <b>Plxdc1</b>    | 5.566349 | 4.11E-17 | 4.11E-17 |
| <b>18100730I</b> | 3.254969 | 2.99E-17 | 2.99E-17 |
| <b>Myo1b</b>     | 1.284136 | 5.87E-17 | 5.87E-17 |
| <b>Rpl37a</b>    | 0.583735 | 1.45E-16 | 1.45E-16 |
| <b>Art3</b>      | 2.876475 | 4.01E-17 | 4.01E-17 |
| <b>Rplp2</b>     | 0.673229 | 1.71E-16 | 1.71E-16 |
| <b>Gucy1b1</b>   | 2.210762 | 4.80E-17 | 4.80E-17 |
| <b>Rpl7</b>      | 0.724417 | 1.79E-16 | 1.79E-16 |
| <b>Serpina3g</b> | 4.307424 | 8.69E-17 | 8.69E-17 |
| <b>Rpl36a</b>    | 0.760251 | 1.84E-16 | 1.84E-16 |
| <b>Rps26</b>     | 0.766001 | 2.24E-16 | 2.24E-16 |
| <b>Rpl9</b>      | 0.594031 | 4.32E-16 | 4.32E-16 |
| <b>Rpl41</b>     | 0.501123 | 3.91E-16 | 3.91E-16 |
| <b>Rpl34</b>     | 0.670682 | 5.56E-16 | 5.56E-16 |
| <b>Plxdc2</b>    | 2.598972 | 1.71E-16 | 1.71E-16 |
| <b>Rpl21</b>     | 0.654445 | 5.96E-16 | 5.96E-16 |
| <b>Lipe</b>      | 1.679566 | 3.05E-16 | 3.05E-16 |
| <b>Rpl29</b>     | 0.732047 | 7.69E-16 | 7.69E-16 |
| <b>2410006H</b>  | 1.381894 | 5.30E-16 | 5.30E-16 |
| <b>Cd63</b>      | 1.782364 | 4.47E-16 | 4.47E-16 |
| <b>Txnip</b>     | 0.86639  | 9.48E-16 | 9.48E-16 |
| <b>Lpl</b>       | 3.691624 | 4.86E-16 | 4.86E-16 |
| <b>Ptgs2</b>     | 4.175006 | 6.52E-16 | 6.52E-16 |
| <b>Rpl10a</b>    | 0.804967 | 1.34E-15 | 1.34E-15 |
| <b>Mfge8</b>     | 1.108274 | 8.88E-16 | 8.88E-16 |
| <b>Ctla2b</b>    | 3.588255 | 7.62E-16 | 7.62E-16 |
| <b>Lrrc4</b>     | 25.74394 | 1.23E-15 | 1.23E-15 |
| <b>Sod3</b>      | 3.648006 | 8.02E-16 | 8.02E-16 |
| <b>Slc12a2</b>   | 1.73351  | 9.45E-16 | 9.45E-16 |
| <b>Eef1b2</b>    | 0.796727 | 2.42E-15 | 2.42E-15 |
| <b>Mal</b>       | 0.837157 | 2.75E-15 | 2.75E-15 |
| <b>Bvht</b>      | 1.04172  | 2.75E-15 | 2.75E-15 |
| <b>Ecscr</b>     | 0.962855 | 3.84E-15 | 3.84E-15 |
| <b>Bgn</b>       | 2.094101 | 1.90E-15 | 1.90E-15 |
| <b>Rps2</b>      | 0.810609 | 4.28E-15 | 4.28E-15 |
| <b>Rps27</b>     | 0.516535 | 5.70E-15 | 5.70E-15 |
| <b>Rps12</b>     | 0.567283 | 7.16E-15 | 7.16E-15 |
| <b>Rps18</b>     | 0.6732   | 7.88E-15 | 7.88E-15 |
| <b>Rps23</b>     | 0.573701 | 9.72E-15 | 9.72E-15 |
| <b>Cadm3</b>     | 5.394072 | 5.73E-15 | 5.73E-15 |

|                |          |          |          |
|----------------|----------|----------|----------|
| <b>Snrk</b>    | 0.855422 | 1.61E-14 | 1.61E-14 |
| <b>Inpp4b</b>  | 2.217632 | 7.91E-15 | 7.91E-15 |
| <b>Net1</b>    | 1.440366 | 1.27E-14 | 1.27E-14 |
| <b>Ier2</b>    | 0.936123 | 2.48E-14 | 2.48E-14 |
| <b>Gimap6</b>  | 0.993143 | 2.15E-14 | 2.15E-14 |
| <b>Map3k6</b>  | 1.698593 | 1.54E-14 | 1.54E-14 |
| <b>Ifitm2</b>  | 0.748018 | 3.13E-14 | 3.13E-14 |
| <b>Map3k8</b>  | 2.307601 | 1.59E-14 | 1.59E-14 |
| <b>Sbno2</b>   | 1.376323 | 2.05E-14 | 2.05E-14 |
| <b>Cspg4</b>   | 2.7003   | 1.69E-14 | 1.69E-14 |
| <b>Slco2b1</b> | 1.229456 | 3.22E-14 | 3.22E-14 |
| <b>Plin2</b>   | 1.27961  | 3.57E-14 | 3.57E-14 |
| <b>S100a1</b>  | 1.132345 | 3.95E-14 | 3.95E-14 |
| <b>Rpl6</b>    | 0.621926 | 7.56E-14 | 7.56E-14 |
| <b>Emilin1</b> | 3.368314 | 5.25E-14 | 5.25E-14 |
| <b>Igf1r</b>   | 0.780148 | 1.22E-13 | 1.22E-13 |
| <b>Csf2rb</b>  | 25.8122  | 9.41E-14 | 9.41E-14 |
| <b>Rps27a</b>  | 0.563507 | 1.76E-13 | 1.76E-13 |
| <b>Rps3</b>    | 0.585329 | 1.63E-13 | 1.63E-13 |
| <b>Rgs16</b>   | 2.701692 | 8.09E-14 | 8.09E-14 |
| <b>Pglyrp1</b> | 0.883946 | 2.00E-13 | 2.00E-13 |
| <b>S1pr3</b>   | 2.680069 | 1.18E-13 | 1.18E-13 |
| <b>Rpl26</b>   | 0.506739 | 2.85E-13 | 2.85E-13 |
| <b>Tiam1</b>   | 1.505907 | 1.71E-13 | 1.71E-13 |
| <b>Rpl30</b>   | 0.599267 | 3.23E-13 | 3.23E-13 |
| <b>Rps9</b>    | 0.597769 | 3.31E-13 | 3.31E-13 |
| <b>Rpl8</b>    | 0.547326 | 3.68E-13 | 3.68E-13 |
| <b>Chst15</b>  | 2.377777 | 1.73E-13 | 1.73E-13 |
| <b>Gnb4</b>    | 1.3454   | 2.48E-13 | 2.48E-13 |
| <b>Nsa2</b>    | 1.106334 | 2.93E-13 | 2.93E-13 |
| <b>Rpl4</b>    | 0.672478 | 3.78E-13 | 3.78E-13 |
| <b>Rpl27</b>   | 0.717171 | 3.95E-13 | 3.95E-13 |
| <b>Klf2</b>    | 0.620763 | 6.06E-13 | 6.06E-13 |
| <b>Fas</b>     | 0.943188 | 4.95E-13 | 4.95E-13 |
| <b>Cox4i2</b>  | 1.725641 | 3.17E-13 | 3.17E-13 |
| <b>Apcdd1</b>  | 1.067238 | 5.06E-13 | 5.06E-13 |
| <b>Rps29</b>   | 0.458333 | 1.26E-12 | 1.26E-12 |
| <b>Rpsa</b>    | 0.698732 | 1.21E-12 | 1.21E-12 |
| <b>Rps13</b>   | 0.602953 | 1.56E-12 | 1.56E-12 |
| <b>Vwa1</b>    | 0.753982 | 2.01E-12 | 2.01E-12 |
| <b>Rpl35</b>   | 0.596885 | 2.00E-12 | 2.00E-12 |
| <b>Sult1a1</b> | 1.32443  | 1.45E-12 | 1.45E-12 |
| <b>Trf</b>     | 3.999233 | 1.16E-12 | 1.16E-12 |
| <b>Itm2c</b>   | 0.975261 | 1.97E-12 | 1.97E-12 |
| <b>Nectin2</b> | 1.887601 | 1.47E-12 | 1.47E-12 |
| <b>Ifi30</b>   | 3.788278 | 1.62E-12 | 1.62E-12 |
| <b>Rpl27a</b>  | 0.613454 | 3.73E-12 | 3.73E-12 |

|                  |          |          |          |
|------------------|----------|----------|----------|
| <b>Gm10076</b>   | 0.753771 | 3.58E-12 | 3.58E-12 |
| <b>Sgk1</b>      | 0.904353 | 3.39E-12 | 3.39E-12 |
| <b>Gpx1</b>      | 0.805156 | 4.42E-12 | 4.42E-12 |
| <b>Slc16a1</b>   | 0.914533 | 6.46E-12 | 6.46E-12 |
| <b>Ccdc85a</b>   | 1.467112 | 4.29E-12 | 4.29E-12 |
| <b>Itga4</b>     | 3.389657 | 4.65E-12 | 4.65E-12 |
| <b>Dbp</b>       | 1.401312 | 7.51E-12 | 7.51E-12 |
| <b>Gm14964</b>   | 3.49979  | 6.45E-12 | 6.45E-12 |
| <b>Mt1</b>       | 1.662558 | 7.61E-12 | 7.61E-12 |
| <b>Ly6a</b>      | 0.49187  | 1.45E-11 | 1.45E-11 |
| <b>Notch3</b>    | 1.601806 | 8.58E-12 | 8.58E-12 |
| <b>Spry4</b>     | 2.241923 | 8.17E-12 | 8.17E-12 |
| <b>Fkbp1a</b>    | 0.770772 | 1.36E-11 | 1.36E-11 |
| <b>Il34</b>      | 3.03438  | 9.34E-12 | 9.34E-12 |
| <b>Kirrel</b>    | 3.954991 | 1.33E-11 | 1.33E-11 |
| <b>Gadd45g</b>   | 1.185589 | 1.66E-11 | 1.66E-11 |
| <b>Med13l</b>    | 1.068495 | 1.89E-11 | 1.89E-11 |
| <b>Slc39a1</b>   | 1.322257 | 1.92E-11 | 1.92E-11 |
| <b>Tcim</b>      | 1.492427 | 1.64E-11 | 1.64E-11 |
| <b>Irf2bp2</b>   | 0.833506 | 2.71E-11 | 2.71E-11 |
| <b>Nek6</b>      | 3.408436 | 1.83E-11 | 1.83E-11 |
| <b>Ier5</b>      | 0.840051 | 2.70E-11 | 2.70E-11 |
| <b>Serpine2</b>  | 2.204993 | 2.23E-11 | 2.23E-11 |
| <b>Itga7</b>     | 3.222109 | 2.34E-11 | 2.34E-11 |
| <b>Uba52</b>     | 0.731327 | 3.87E-11 | 3.87E-11 |
| <b>Ctsw</b>      | 3.135444 | 2.71E-11 | 2.71E-11 |
| <b>Higd1b</b>    | 1.534976 | 3.08E-11 | 3.08E-11 |
| <b>Rgs4</b>      | 2.037801 | 3.98E-11 | 3.98E-11 |
| <b>Hspg2</b>     | 1.081511 | 7.27E-11 | 7.27E-11 |
| <b>Adgrg6</b>    | 25.2652  | 7.89E-11 | 7.89E-11 |
| <b>Plxnb2</b>    | 2.305432 | 7.49E-11 | 7.49E-11 |
| <b>Mmp14</b>     | 5.857308 | 8.00E-11 | 8.00E-11 |
| <b>Pard3</b>     | 1.254428 | 8.94E-11 | 8.94E-11 |
| <b>Flot1</b>     | 1.423889 | 9.36E-11 | 9.36E-11 |
| <b>Tbx2</b>      | 2.373268 | 8.17E-11 | 8.17E-11 |
| <b>Rps21</b>     | 0.465028 | 1.42E-10 | 1.42E-10 |
| <b>Adamts9</b>   | 1.955886 | 8.93E-11 | 8.93E-11 |
| <b>Dcun1d3</b>   | 1.208559 | 1.22E-10 | 1.22E-10 |
| <b>Shroom2</b>   | 1.479025 | 1.33E-10 | 1.33E-10 |
| <b>Rpsa-ps10</b> | 0.800284 | 1.79E-10 | 1.79E-10 |
| <b>Rps3a1</b>    | 0.526087 | 2.54E-10 | 2.54E-10 |
| <b>Pxn</b>       | 1.103195 | 2.02E-10 | 2.02E-10 |
| <b>Ednra</b>     | 2.66387  | 1.47E-10 | 1.47E-10 |
| <b>Foxs1</b>     | 3.240414 | 1.75E-10 | 1.75E-10 |
| <b>Zfas1</b>     | 1.428255 | 2.23E-10 | 2.23E-10 |
| <b>Adora2a</b>   | 3.071569 | 1.91E-10 | 1.91E-10 |
| <b>Gprc5c</b>    | 2.923175 | 1.91E-10 | 1.91E-10 |

|                   |          |          |          |
|-------------------|----------|----------|----------|
| <b>Lrrc8c</b>     | 0.783496 | 2.71E-10 | 2.71E-10 |
| <b>Gm49708</b>    | 3.678546 | 2.25E-10 | 2.25E-10 |
| <b>Stat3</b>      | 0.894923 | 3.12E-10 | 3.12E-10 |
| <b>St3gal1</b>    | 1.380825 | 2.73E-10 | 2.73E-10 |
| <b>Bcl2l1</b>     | 0.812937 | 3.29E-10 | 3.29E-10 |
| <b>Hmgcl</b>      | 1.892717 | 2.68E-10 | 2.68E-10 |
| <b>Cpne8</b>      | 1.104333 | 3.81E-10 | 3.81E-10 |
| <b>Cnot6</b>      | 0.871235 | 4.23E-10 | 4.23E-10 |
| <b>Phlda1</b>     | 2.736731 | 3.47E-10 | 3.47E-10 |
| <b>Sdk2</b>       | 3.872021 | 4.36E-10 | 4.36E-10 |
| <b>Arhgef17</b>   | 1.756351 | 4.48E-10 | 4.48E-10 |
| <b>Enpep</b>      | 3.955533 | 4.89E-10 | 4.89E-10 |
| <b>Tfpi</b>       | 2.057935 | 4.48E-10 | 4.48E-10 |
| <b>Sema6a</b>     | 1.093001 | 5.34E-10 | 5.34E-10 |
| <b>Tnfaip8l1</b>  | 1.985969 | 4.98E-10 | 4.98E-10 |
| <b>Ecm1</b>       | 0.880219 | 7.10E-10 | 7.10E-10 |
| <b>Lama2</b>      | 2.575081 | 5.87E-10 | 5.87E-10 |
| <b>Gng2</b>       | 3.43212  | 6.21E-10 | 6.21E-10 |
| <b>Limd1</b>      | 1.338873 | 6.98E-10 | 6.98E-10 |
| <b>Gm39822</b>    | 1.951056 | 6.46E-10 | 6.46E-10 |
| <b>Gpx8</b>       | 2.631847 | 7.52E-10 | 7.52E-10 |
| <b>Cacna1e</b>    | 25.46522 | 9.28E-10 | 9.28E-10 |
| <b>Acot1</b>      | 4.633123 | 8.71E-10 | 8.71E-10 |
| <b>Pcdh18</b>     | 2.743652 | 8.03E-10 | 8.03E-10 |
| <b>Midn</b>       | 0.972913 | 1.08E-09 | 1.08E-09 |
| <b>Olfr1372-p</b> | 1.044062 | 1.04E-09 | 1.04E-09 |
| <b>Ybx1</b>       | 0.521809 | 1.40E-09 | 1.40E-09 |
| <b>Hopx</b>       | 3.543566 | 9.17E-10 | 9.17E-10 |
| <b>Ciart</b>      | 3.096045 | 9.35E-10 | 9.35E-10 |
| <b>Rpl11</b>      | 0.469394 | 1.42E-09 | 1.42E-09 |
| <b>Steap4</b>     | 4.86658  | 1.09E-09 | 1.09E-09 |
| <b>C1s1</b>       | 2.812589 | 1.01E-09 | 1.01E-09 |
| <b>Serping1</b>   | 2.623106 | 1.07E-09 | 1.07E-09 |
| <b>Snhg8</b>      | 0.968493 | 1.33E-09 | 1.33E-09 |
| <b>Emp1</b>       | 1.049957 | 1.31E-09 | 1.31E-09 |
| <b>Mrpl30</b>     | 1.056217 | 1.42E-09 | 1.42E-09 |
| <b>Sparc</b>      | 0.513232 | 2.12E-09 | 2.12E-09 |
| <b>Rhoj</b>       | 0.833024 | 1.61E-09 | 1.61E-09 |
| <b>Ccdc85b</b>    | 0.664978 | 1.81E-09 | 1.81E-09 |
| <b>Steap3</b>     | 1.576151 | 1.48E-09 | 1.48E-09 |
| <b>Rps25</b>      | 0.51717  | 2.33E-09 | 2.33E-09 |
| <b>Gadd45b</b>    | 1.313744 | 1.98E-09 | 1.98E-09 |
| <b>Clip1</b>      | 0.77367  | 2.19E-09 | 2.19E-09 |
| <b>Sh3bp5</b>     | 1.128995 | 2.10E-09 | 2.10E-09 |
| <b>Slco1a4</b>    | 0.532293 | 3.73E-09 | 3.73E-09 |
| <b>Clca3a1</b>    | 3.555088 | 3.46E-09 | 3.46E-09 |
| <b>Ubc</b>        | 0.530081 | 4.96E-09 | 4.96E-09 |

|                  |          |          |          |
|------------------|----------|----------|----------|
| <b>Spns2</b>     | 1.626962 | 3.46E-09 | 3.46E-09 |
| <b>Naca</b>      | 0.535881 | 4.95E-09 | 4.95E-09 |
| <b>Rasl11a</b>   | 2.330871 | 3.53E-09 | 3.53E-09 |
| <b>Lrp1</b>      | 1.651757 | 3.90E-09 | 3.90E-09 |
| <b>Pabpc1</b>    | 0.738733 | 5.08E-09 | 5.08E-09 |
| <b>Smad1</b>     | 0.92338  | 5.05E-09 | 5.05E-09 |
| <b>Meox1</b>     | 1.806062 | 4.43E-09 | 4.43E-09 |
| <b>Rpl23a</b>    | 0.591093 | 6.41E-09 | 6.41E-09 |
| <b>Sdc2</b>      | 1.632403 | 4.92E-09 | 4.92E-09 |
| <b>Tnfrsf1a</b>  | 1.007823 | 6.30E-09 | 6.30E-09 |
| <b>Unc45b</b>    | 1.28102  | 6.09E-09 | 6.09E-09 |
| <b>2810025M</b>  | 0.962084 | 7.16E-09 | 7.16E-09 |
| <b>G0s2</b>      | 3.566105 | 6.01E-09 | 6.01E-09 |
| <b>Pdlim1</b>    | 2.2854   | 6.40E-09 | 6.40E-09 |
| <b>Gngt2</b>     | 1.121903 | 7.74E-09 | 7.74E-09 |
| <b>Rpl7a</b>     | 0.567948 | 9.20E-09 | 9.20E-09 |
| <b>Peli1</b>     | 0.905582 | 8.77E-09 | 8.77E-09 |
| <b>Fry</b>       | 0.669084 | 9.39E-09 | 9.39E-09 |
| <b>Trarg1</b>    | 3.896912 | 8.38E-09 | 8.38E-09 |
| <b>Il17ra</b>    | 2.239098 | 8.53E-09 | 8.53E-09 |
| <b>Arid5b</b>    | 0.707063 | 1.25E-08 | 1.25E-08 |
| <b>Cd248</b>     | 2.067143 | 1.01E-08 | 1.01E-08 |
| <b>Serpib9</b>   | 1.122817 | 1.11E-08 | 1.11E-08 |
| <b>Zic1</b>      | 2.51625  | 1.03E-08 | 1.03E-08 |
| <b>Adcyap1r1</b> | 24.47999 | 1.22E-08 | 1.22E-08 |
| <b>Gpr160</b>    | 1.335085 | 1.17E-08 | 1.17E-08 |
| <b>Hilpda</b>    | 1.604939 | 1.19E-08 | 1.19E-08 |
| <b>Paqr7</b>     | 1.476279 | 1.25E-08 | 1.25E-08 |
| <b>Lcp1</b>      | 1.595598 | 1.31E-08 | 1.31E-08 |
| <b>Hlf</b>       | 1.483815 | 1.38E-08 | 1.38E-08 |
| <b>Prnp</b>      | 0.648    | 1.70E-08 | 1.70E-08 |
| <b>2200002Di</b> | 1.485436 | 1.50E-08 | 1.50E-08 |
| <b>Gucy1a1</b>   | 1.754858 | 1.48E-08 | 1.48E-08 |
| <b>Pfdn5</b>     | 0.504394 | 1.98E-08 | 1.98E-08 |
| <b>Gnai2</b>     | 0.44778  | 2.18E-08 | 2.18E-08 |
| <b>Kcne4</b>     | 24.42275 | 2.00E-08 | 2.00E-08 |
| <b>Bcr</b>       | 1.087605 | 1.94E-08 | 1.94E-08 |
| <b>Pde4b</b>     | 1.458463 | 1.93E-08 | 1.93E-08 |
| <b>Mbnl2</b>     | 0.692323 | 2.35E-08 | 2.35E-08 |
| <b>Angpt2</b>    | 3.243546 | 1.96E-08 | 1.96E-08 |
| <b>Adamts4</b>   | 24.09841 | 2.36E-08 | 2.36E-08 |
| <b>Cyp2d22</b>   | 0.895556 | 2.47E-08 | 2.47E-08 |
| <b>Nr1d1</b>     | 0.963532 | 2.47E-08 | 2.47E-08 |
| <b>Lama4</b>     | 1.130679 | 2.47E-08 | 2.47E-08 |
| <b>Atp1b3</b>    | 0.71852  | 3.00E-08 | 3.00E-08 |
| <b>Adgrg1</b>    | 0.740455 | 3.04E-08 | 3.04E-08 |
| <b>Uqcrh</b>     | 0.546777 | 3.70E-08 | 3.70E-08 |



|                 |          |          |          |
|-----------------|----------|----------|----------|
| <b>Capg</b>     | 0.856869 | 3.48E-08 | 3.48E-08 |
| <b>Kcna5</b>    | 2.071634 | 3.01E-08 | 3.01E-08 |
| <b>Pla1a</b>    | 2.764777 | 3.39E-08 | 3.39E-08 |
| <b>Cox7a2l</b>  | 0.591305 | 4.23E-08 | 4.23E-08 |
| <b>Agl</b>      | 1.693745 | 3.73E-08 | 3.73E-08 |
| <b>Gas5</b>     | 0.644448 | 4.63E-08 | 4.63E-08 |
| <b>Wnt5a</b>    | 2.55167  | 3.74E-08 | 3.74E-08 |
| <b>Tgfb1</b>    | 4.049502 | 4.02E-08 | 4.02E-08 |
| <b>Cd14</b>     | 3.88497  | 4.08E-08 | 4.08E-08 |
| <b>Ndufc2</b>   | 0.675048 | 4.71E-08 | 4.71E-08 |
| <b>Osbpl3</b>   | 3.274736 | 3.92E-08 | 3.92E-08 |
| <b>Septin4</b>  | 0.85112  | 4.73E-08 | 4.73E-08 |
| <b>Rps10</b>    | 0.625334 | 5.75E-08 | 5.75E-08 |
| <b>Itga1</b>    | 0.604692 | 5.83E-08 | 5.83E-08 |
| <b>Bst1</b>     | 5.073722 | 5.24E-08 | 5.24E-08 |
| <b>Rps17</b>    | 0.471828 | 6.69E-08 | 6.69E-08 |
| <b>Efh2</b>     | 1.198958 | 6.11E-08 | 6.11E-08 |
| <b>Rhob</b>     | 0.56334  | 7.68E-08 | 7.68E-08 |
| <b>Prdx5</b>    | 0.945322 | 7.45E-08 | 7.45E-08 |
| <b>Lamb1</b>    | 2.948284 | 6.76E-08 | 6.76E-08 |
| <b>Gm30571</b>  | 1.936173 | 7.13E-08 | 7.13E-08 |
| <b>Nbl1</b>     | 1.438097 | 8.30E-08 | 8.30E-08 |
| <b>Rpl24</b>    | 0.64469  | 9.75E-08 | 9.75E-08 |
| <b>Hspb2</b>    | 4.069844 | 8.48E-08 | 8.48E-08 |
| <b>Rarres2</b>  | 1.563121 | 8.73E-08 | 8.73E-08 |
| <b>Myh9</b>     | 0.567459 | 1.07E-07 | 1.07E-07 |
| <b>Dab2</b>     | 0.904686 | 1.02E-07 | 1.02E-07 |
| <b>Cirbp</b>    | 0.754485 | 1.07E-07 | 1.07E-07 |
| <b>C1qtnf2</b>  | 24.11069 | 1.03E-07 | 1.03E-07 |
| <b>Abat</b>     | 2.930188 | 9.88E-08 | 9.88E-08 |
| <b>Prr5</b>     | 5.537461 | 1.09E-07 | 1.09E-07 |
| <b>Sema6b</b>   | 1.81944  | 1.12E-07 | 1.12E-07 |
| <b>Arhgap42</b> | 1.696363 | 1.16E-07 | 1.16E-07 |
| <b>Ndufa6</b>   | 0.655995 | 1.41E-07 | 1.41E-07 |
| <b>Fscn1</b>    | 24.61949 | 1.36E-07 | 1.36E-07 |
| <b>Cebpb</b>    | 1.24092  | 1.29E-07 | 1.29E-07 |
| <b>Fam43a</b>   | 1.345681 | 1.32E-07 | 1.32E-07 |
| <b>Sema7a</b>   | 0.64215  | 1.54E-07 | 1.54E-07 |
| <b>Pde4c</b>    | 4.058904 | 1.37E-07 | 1.37E-07 |
| <b>Pcolce</b>   | 2.484375 | 1.37E-07 | 1.37E-07 |
| <b>Apod</b>     | 1.749096 | 1.37E-07 | 1.37E-07 |
| <b>Spp1</b>     | 25.34979 | 1.65E-07 | 1.65E-07 |
| <b>Baiap3</b>   | 3.944492 | 1.79E-07 | 1.79E-07 |
| <b>Rin3</b>     | 1.426324 | 1.96E-07 | 1.96E-07 |
| <b>Eef2</b>     | 0.48919  | 2.77E-07 | 2.77E-07 |
| <b>Synpo</b>    | 1.481317 | 2.44E-07 | 2.44E-07 |
| <b>Csnk1a1</b>  | 0.554786 | 2.91E-07 | 2.91E-07 |

|                  |          |          |          |
|------------------|----------|----------|----------|
| <b>Acacb</b>     | 1.258998 | 2.84E-07 | 2.84E-07 |
| <b>Gpc3</b>      | 2.371779 | 2.66E-07 | 2.66E-07 |
| <b>Aspn</b>      | 1.840583 | 2.76E-07 | 2.76E-07 |
| <b>Tnip1</b>     | 1.525329 | 2.84E-07 | 2.84E-07 |
| <b>Sting1</b>    | 2.239897 | 2.81E-07 | 2.81E-07 |
| <b>Ech1</b>      | 0.70899  | 3.73E-07 | 3.73E-07 |
| <b>Nrp2</b>      | 1.134644 | 3.71E-07 | 3.71E-07 |
| <b>Anpep</b>     | 3.754441 | 3.61E-07 | 3.61E-07 |
| <b>Rpl31</b>     | 0.49811  | 4.53E-07 | 4.53E-07 |
| <b>L3hypdh</b>   | 2.642982 | 3.71E-07 | 3.71E-07 |
| <b>Imp3</b>      | 0.86075  | 4.27E-07 | 4.27E-07 |
| <b>Ang</b>       | 2.341433 | 3.80E-07 | 3.80E-07 |
| <b>Gm8420</b>    | 1.269366 | 4.45E-07 | 4.45E-07 |
| <b>Mrpl52</b>    | 0.7906   | 4.87E-07 | 4.87E-07 |
| <b>Hspa2</b>     | 1.902306 | 4.62E-07 | 4.62E-07 |
| <b>Car4</b>      | 2.228528 | 4.81E-07 | 4.81E-07 |
| <b>Doc2b</b>     | 2.621818 | 5.50E-07 | 5.50E-07 |
| <b>Sdc3</b>      | 0.736182 | 7.18E-07 | 7.18E-07 |
| <b>Nfkbiz</b>    | 1.218862 | 7.13E-07 | 7.13E-07 |
| <b>Maff</b>      | 1.437309 | 7.35E-07 | 7.35E-07 |
| <b>Ctps</b>      | 1.416951 | 9.81E-07 | 9.81E-07 |
| <b>Gm26532</b>   | 0.94522  | 1.03E-06 | 1.03E-06 |
| <b>Plxna2</b>    | 0.689242 | 1.15E-06 | 1.15E-06 |
| <b>Lmf1</b>      | 2.449537 | 1.01E-06 | 1.01E-06 |
| <b>Pitpnc1</b>   | 0.74899  | 1.17E-06 | 1.17E-06 |
| <b>Dusp6</b>     | 0.901602 | 1.15E-06 | 1.15E-06 |
| <b>Nupr1</b>     | 1.764708 | 1.08E-06 | 1.08E-06 |
| <b>Sdcbp</b>     | 0.643245 | 1.26E-06 | 1.26E-06 |
| <b>Serpinb1a</b> | 1.380694 | 1.18E-06 | 1.18E-06 |
| <b>Klf15</b>     | 23.83445 | 1.31E-06 | 1.31E-06 |
| <b>Carmn</b>     | 3.072381 | 1.26E-06 | 1.26E-06 |
| <b>Slc16a9</b>   | 1.109398 | 1.42E-06 | 1.42E-06 |
| <b>Actn1</b>     | 0.802339 | 1.50E-06 | 1.50E-06 |
| <b>Tceal9</b>    | 0.656139 | 1.47E-06 | 1.47E-06 |
| <b>Id3</b>       | 0.446284 | 1.55E-06 | 1.55E-06 |
| <b>H6pd</b>      | 2.375692 | 1.33E-06 | 1.33E-06 |
| <b>Tsc22d4</b>   | 1.002058 | 1.47E-06 | 1.47E-06 |
| <b>Rell1</b>     | 1.121246 | 1.71E-06 | 1.71E-06 |
| <b>Sertad1</b>   | 0.94033  | 1.70E-06 | 1.70E-06 |
| <b>Serinc3</b>   | 0.345972 | 1.98E-06 | 1.98E-06 |
| <b>Gm13889</b>   | 1.764586 | 1.79E-06 | 1.79E-06 |
| <b>Tspan4</b>    | 0.854358 | 2.05E-06 | 2.05E-06 |
| <b>Gm18068</b>   | 3.310417 | 1.90E-06 | 1.90E-06 |
| <b>Rpl22l1</b>   | 0.589043 | 2.17E-06 | 2.17E-06 |
| <b>C1qtnf6</b>   | 5.390053 | 2.02E-06 | 2.02E-06 |
| <b>Nrgn</b>      | 1.893143 | 1.90E-06 | 1.90E-06 |
| <b>Susd6</b>     | 0.957799 | 2.17E-06 | 2.17E-06 |

|                   |          |          |          |
|-------------------|----------|----------|----------|
| <b>Gm8730</b>     | 1.838629 | 2.19E-06 | 2.19E-06 |
| <b>Ehd3</b>       | 1.350081 | 2.29E-06 | 2.29E-06 |
| <b>Ugcg</b>       | 1.479086 | 2.32E-06 | 2.32E-06 |
| <b>Tgfbr3</b>     | 1.042472 | 2.46E-06 | 2.46E-06 |
| <b>Hipk1</b>      | 0.734931 | 2.67E-06 | 2.67E-06 |
| <b>Gm49839</b>    | 3.097397 | 2.61E-06 | 2.61E-06 |
| <b>Dact1</b>      | 2.437975 | 2.64E-06 | 2.64E-06 |
| <b>Extl2</b>      | 2.502834 | 2.74E-06 | 2.74E-06 |
| <b>Rpl15</b>      | 0.524062 | 3.37E-06 | 3.37E-06 |
| <b>Nr2f1</b>      | 1.734317 | 3.07E-06 | 3.07E-06 |
| <b>Ajuba</b>      | 1.797227 | 3.33E-06 | 3.33E-06 |
| <b>Pawr</b>       | 1.916113 | 3.42E-06 | 3.42E-06 |
| <b>Mustn1</b>     | 1.580733 | 3.87E-06 | 3.87E-06 |
| <b>Susd2</b>      | 23.9268  | 4.47E-06 | 4.47E-06 |
| <b>Fam13a</b>     | 2.422671 | 4.38E-06 | 4.38E-06 |
| <b>Aldh2</b>      | 0.538225 | 5.34E-06 | 5.34E-06 |
| <b>B130024G</b>   | 4.453082 | 5.09E-06 | 5.09E-06 |
| <b>Spred3</b>     | 2.67657  | 4.85E-06 | 4.85E-06 |
| <b>Gm17229</b>    | 4.899972 | 5.29E-06 | 5.29E-06 |
| <b>Nek7</b>       | 0.666987 | 5.52E-06 | 5.52E-06 |
| <b>MIph</b>       | 2.221526 | 5.01E-06 | 5.01E-06 |
| <b>Gng5</b>       | 0.433264 | 5.86E-06 | 5.86E-06 |
| <b>Rps15a-psi</b> | 0.860072 | 5.63E-06 | 5.63E-06 |
| <b>Fmnl2</b>      | 1.118591 | 5.59E-06 | 5.59E-06 |
| <b>Fth1-ps</b>    | 3.434205 | 5.36E-06 | 5.36E-06 |
| <b>Fam107a</b>    | 0.72456  | 5.94E-06 | 5.94E-06 |
| <b>Smim3</b>      | 2.419062 | 5.48E-06 | 5.48E-06 |
| <b>Ttll7</b>      | 0.712123 | 6.05E-06 | 6.05E-06 |
| <b>Errfi1</b>     | 1.27237  | 6.14E-06 | 6.14E-06 |
| <b>Larp1b</b>     | 1.474236 | 6.01E-06 | 6.01E-06 |
| <b>Gstt1</b>      | 1.740419 | 6.08E-06 | 6.08E-06 |
| <b>Sorbs1</b>     | 0.797061 | 6.58E-06 | 6.58E-06 |
| <b>Lrrc75a</b>    | 23.86705 | 6.75E-06 | 6.75E-06 |
| <b>Qk</b>         | 0.462155 | 7.41E-06 | 7.41E-06 |
| <b>Tpm3-rs7</b>   | 0.672919 | 7.27E-06 | 7.27E-06 |
| <b>Nt5dc2</b>     | 1.600488 | 6.66E-06 | 6.66E-06 |
| <b>Gapdh</b>      | 0.49664  | 7.58E-06 | 7.58E-06 |
| <b>Sod2</b>       | 0.74942  | 7.26E-06 | 7.26E-06 |
| <b>Csrnp1</b>     | 1.204216 | 7.43E-06 | 7.43E-06 |
| <b>Vasn</b>       | 2.234779 | 7.05E-06 | 7.05E-06 |
| <b>Apold1</b>     | 0.656929 | 8.36E-06 | 8.36E-06 |
| <b>Rpl13a</b>     | 0.63071  | 8.56E-06 | 8.56E-06 |
| <b>Eng</b>        | 0.438075 | 8.98E-06 | 8.98E-06 |
| <b>Ndufa4l2</b>   | 0.996167 | 8.53E-06 | 8.53E-06 |
| <b>Btf3</b>       | 0.436728 | 9.32E-06 | 9.32E-06 |
| <b>Scn1b</b>      | 1.492427 | 9.28E-06 | 9.28E-06 |
| <b>Sox12</b>      | 1.908054 | 9.17E-06 | 9.17E-06 |

|                  |          |          |          |
|------------------|----------|----------|----------|
| <b>Eif3f</b>     | 0.461905 | 1.03E-05 | 1.03E-05 |
| <b>Anxa2</b>     | 0.552439 | 1.04E-05 | 1.04E-05 |
| <b>Ubald2</b>    | 0.731073 | 1.01E-05 | 1.01E-05 |
| <b>Bclaf1</b>    | 0.606076 | 1.02E-05 | 1.02E-05 |
| <b>Tpt1-ps3</b>  | 1.192579 | 1.08E-05 | 1.08E-05 |
| <b>Blvrb</b>     | 0.821047 | 1.12E-05 | 1.12E-05 |
| <b>Carhsp1</b>   | 1.240169 | 1.09E-05 | 1.09E-05 |
| <b>Ogfrl1</b>    | 1.213395 | 1.11E-05 | 1.11E-05 |
| <b>Lrrc8b</b>    | 1.235179 | 1.30E-05 | 1.30E-05 |
| <b>Abcg1</b>     | 1.571186 | 1.28E-05 | 1.28E-05 |
| <b>Ndufa8</b>    | 0.626541 | 1.35E-05 | 1.35E-05 |
| <b>Itga2b</b>    | 2.387029 | 1.25E-05 | 1.25E-05 |
| <b>Emcn</b>      | 0.557541 | 1.44E-05 | 1.44E-05 |
| <b>Sparcl1</b>   | 0.388223 | 1.46E-05 | 1.46E-05 |
| <b>Ppp1r18</b>   | 1.048599 | 1.36E-05 | 1.36E-05 |
| <b>Parp3</b>     | 2.091662 | 1.36E-05 | 1.36E-05 |
| <b>Slc1a1</b>    | 0.986947 | 1.55E-05 | 1.55E-05 |
| <b>Cdkn2d</b>    | 0.928498 | 1.60E-05 | 1.60E-05 |
| <b>Trim37</b>    | 0.99449  | 1.58E-05 | 1.58E-05 |
| <b>Perp</b>      | 1.613356 | 1.60E-05 | 1.60E-05 |
| <b>Fblim1</b>    | 2.451545 | 1.74E-05 | 1.74E-05 |
| <b>Tbc1d15</b>   | 0.917728 | 1.87E-05 | 1.87E-05 |
| <b>Spop</b>      | 0.560354 | 1.91E-05 | 1.91E-05 |
| <b>Rpl14-ps1</b> | 0.706119 | 1.90E-05 | 1.90E-05 |
| <b>Cdh4</b>      | 4.3857   | 1.86E-05 | 1.86E-05 |
| <b>Yy1</b>       | 0.716992 | 2.06E-05 | 2.06E-05 |
| <b>Pard6g</b>    | 2.308505 | 1.98E-05 | 1.98E-05 |
| <b>Clec14a</b>   | 0.906982 | 2.19E-05 | 2.19E-05 |
| <b>Plekho2</b>   | 1.549691 | 2.19E-05 | 2.19E-05 |
| <b>Psat1</b>     | 3.128764 | 2.21E-05 | 2.21E-05 |
| <b>Septin8</b>   | 1.020832 | 2.42E-05 | 2.42E-05 |
| <b>Tmie</b>      | 2.576995 | 2.28E-05 | 2.28E-05 |
| <b>Ddit4</b>     | 0.659729 | 2.52E-05 | 2.52E-05 |
| <b>Hnrnpul1</b>  | 0.798169 | 2.72E-05 | 2.72E-05 |
| <b>Plxna4</b>    | 3.062654 | 2.68E-05 | 2.68E-05 |
| <b>Itpripl1</b>  | 1.310697 | 3.03E-05 | 3.03E-05 |
| <b>Tgfbr2</b>    | 0.507098 | 3.20E-05 | 3.20E-05 |
| <b>Twist1</b>    | 23.71192 | 3.10E-05 | 3.10E-05 |
| <b>Pvr</b>       | 1.178886 | 3.15E-05 | 3.15E-05 |
| <b>Igf2r</b>     | 1.209434 | 3.16E-05 | 3.16E-05 |
| <b>Polk</b>      | 0.765543 | 3.35E-05 | 3.35E-05 |
| <b>Sesn1</b>     | 0.815592 | 3.29E-05 | 3.29E-05 |
| <b>Lrp5</b>      | 0.93552  | 3.31E-05 | 3.31E-05 |
| <b>Pcdh7</b>     | 24.48661 | 3.32E-05 | 3.32E-05 |
| <b>Bmp4</b>      | 23.6072  | 3.34E-05 | 3.34E-05 |
| <b>Pgm5</b>      | 1.026261 | 3.34E-05 | 3.34E-05 |
| <b>Nfe2l2</b>    | 0.674829 | 3.60E-05 | 3.60E-05 |

|                  |          |          |          |
|------------------|----------|----------|----------|
| <b>Arhgap26-</b> | 1.063972 | 3.55E-05 | 3.55E-05 |
| <b>Hif3a</b>     | 3.527986 | 3.46E-05 | 3.46E-05 |
| <b>Jak3</b>      | 1.85561  | 3.55E-05 | 3.55E-05 |
| <b>Rpl5</b>      | 0.44871  | 3.97E-05 | 3.97E-05 |
| <b>Hrct1</b>     | 0.632528 | 3.98E-05 | 3.98E-05 |
| <b>Mir22hg</b>   | 1.674387 | 3.80E-05 | 3.80E-05 |
| <b>Ptpn13</b>    | 4.227486 | 3.90E-05 | 3.90E-05 |
| <b>M6pr</b>      | 0.817031 | 4.22E-05 | 4.22E-05 |
| <b>Ctsl</b>      | 0.54746  | 4.32E-05 | 4.32E-05 |
| <b>Espn</b>      | 1.699519 | 4.02E-05 | 4.02E-05 |
| <b>Cdca7</b>     | 2.514626 | 4.00E-05 | 4.00E-05 |
| <b>Lrrc8d</b>    | 1.613885 | 4.03E-05 | 4.03E-05 |
| <b>C130089K</b>  | 2.485317 | 4.03E-05 | 4.03E-05 |
| <b>Bex3</b>      | 0.818418 | 4.39E-05 | 4.39E-05 |
| <b>Btg1</b>      | 0.586803 | 4.57E-05 | 4.57E-05 |
| <b>Zmiz1</b>     | 0.578603 | 4.60E-05 | 4.60E-05 |
| <b>Rnd1</b>      | 1.476225 | 4.33E-05 | 4.33E-05 |
| <b>Pkp4</b>      | 0.576594 | 4.63E-05 | 4.63E-05 |
| <b>Arl5c</b>     | 3.432964 | 4.35E-05 | 4.35E-05 |
| <b>Eif4ebp1</b>  | 1.245944 | 4.62E-05 | 4.62E-05 |
| <b>Lrrc8a</b>    | 0.695122 | 4.82E-05 | 4.82E-05 |
| <b>Gstt2</b>     | 0.943713 | 4.90E-05 | 4.90E-05 |
| <b>Mmgt2</b>     | 1.63351  | 4.79E-05 | 4.79E-05 |
| <b>Slc19a1</b>   | 1.582085 | 4.90E-05 | 4.90E-05 |
| <b>Rtraf</b>     | 0.653318 | 5.22E-05 | 5.22E-05 |
| <b>Lhx2</b>      | 1.972283 | 4.99E-05 | 4.99E-05 |
| <b>Mr1</b>       | 1.370596 | 5.20E-05 | 5.20E-05 |
| <b>Rplp1</b>     | 0.256921 | 5.61E-05 | 5.61E-05 |
| <b>Tmem159</b>   | 0.944878 | 5.52E-05 | 5.52E-05 |
| <b>BC028528</b>  | 0.591805 | 5.82E-05 | 5.82E-05 |
| <b>Src</b>       | 1.933601 | 5.46E-05 | 5.46E-05 |
| <b>Cln6</b>      | 1.766037 | 5.61E-05 | 5.61E-05 |
| <b>Phf20</b>     | 0.895808 | 6.06E-05 | 6.06E-05 |
| <b>Cchcr1</b>    | 2.965819 | 5.74E-05 | 5.74E-05 |
| <b>Klf4</b>      | 0.432497 | 6.32E-05 | 6.32E-05 |
| <b>B4galt4</b>   | 0.715692 | 6.18E-05 | 6.18E-05 |
| <b>Axl</b>       | 1.430119 | 6.22E-05 | 6.22E-05 |
| <b>Nfib</b>      | 0.465661 | 6.68E-05 | 6.68E-05 |
| <b>Ctsb</b>      | 0.589628 | 6.69E-05 | 6.69E-05 |
| <b>Aldh3b1</b>   | 2.716361 | 6.34E-05 | 6.34E-05 |
| <b>Robo4</b>     | 0.612444 | 6.78E-05 | 6.78E-05 |
| <b>Prdx6</b>     | 0.722193 | 6.83E-05 | 6.83E-05 |
| <b>Tns2</b>      | 0.627952 | 6.87E-05 | 6.87E-05 |
| <b>Spsb2</b>     | 1.369221 | 6.60E-05 | 6.60E-05 |
| <b>Ppp1r3d</b>   | 23.35543 | 7.05E-05 | 7.05E-05 |
| <b>Dbt</b>       | 2.44906  | 6.78E-05 | 6.78E-05 |
| <b>Aars2</b>     | 3.686301 | 6.87E-05 | 6.87E-05 |

|                   |          |          |          |
|-------------------|----------|----------|----------|
| <b>E130311K1</b>  | 2.456623 | 6.89E-05 | 6.89E-05 |
| <b>Slc31a1</b>    | 0.761241 | 7.34E-05 | 7.34E-05 |
| <b>Gm12002</b>    | 5.06787  | 7.34E-05 | 7.34E-05 |
| <b>Hyi</b>        | 1.506078 | 7.32E-05 | 7.32E-05 |
| <b>Tox</b>        | 23.89356 | 7.69E-05 | 7.69E-05 |
| <b>Klf13</b>      | 0.535704 | 8.26E-05 | 8.26E-05 |
| <b>Trappc6a</b>   | 1.007801 | 7.88E-05 | 7.88E-05 |
| <b>Tnfrsf21</b>   | 1.5995   | 8.26E-05 | 8.26E-05 |
| <b>Fxyd1</b>      | 1.090077 | 8.62E-05 | 8.62E-05 |
| <b>Dapl1</b>      | 1.354315 | 9.02E-05 | 9.02E-05 |
| <b>Trpc3</b>      | 1.9682   | 8.84E-05 | 8.84E-05 |
| <b>Pkdcc</b>      | 3.253497 | 9.19E-05 | 9.19E-05 |
| <b>Phc1</b>       | 1.051087 | 9.54E-05 | 9.54E-05 |
| <b>Chst14</b>     | 1.869113 | 9.47E-05 | 9.47E-05 |
| <b>Cep57l1</b>    | 1.958329 | 9.59E-05 | 9.59E-05 |
| <b>Thrsp</b>      | 1.711777 | 9.83E-05 | 9.83E-05 |
| <b>Prrt4</b>      | 0.928676 | 0.000104 | 0.000104 |
| <b>Arap2</b>      | 0.72436  | 0.000106 | 0.000106 |
| <b>Gde1</b>       | 0.669847 | 0.000107 | 0.000107 |
| <b>Gm13861</b>    | 1.403297 | 0.000102 | 0.000102 |
| <b>Nr4a1</b>      | 0.734163 | 0.000107 | 0.000107 |
| <b>Elk3</b>       | 0.559242 | 0.000109 | 0.000109 |
| <b>Tmem38b</b>    | 1.633115 | 0.000107 | 0.000107 |
| <b>Gm15261</b>    | 23.56991 | 0.000113 | 0.000113 |
| <b>Fkbp10</b>     | 1.750556 | 0.000112 | 0.000112 |
| <b>Gpcpd1</b>     | 0.424556 | 0.00012  | 0.00012  |
| <b>Mrps34</b>     | 0.966661 | 0.000114 | 0.000114 |
| <b>Tcf4</b>       | 0.338474 | 0.00012  | 0.00012  |
| <b>Smagp</b>      | 0.898029 | 0.000118 | 0.000118 |
| <b>Vars</b>       | 1.387414 | 0.000116 | 0.000116 |
| <b>Cyyr1</b>      | 0.435014 | 0.000124 | 0.000124 |
| <b>Snhg12</b>     | 0.969392 | 0.000119 | 0.000119 |
| <b>Ildr2</b>      | 1.092596 | 0.000119 | 0.000119 |
| <b>St6galnac2</b> | 0.638101 | 0.000124 | 0.000124 |
| <b>Mrc2</b>       | 2.572064 | 0.000118 | 0.000118 |
| <b>Tbx18</b>      | 3.166917 | 0.000121 | 0.000121 |
| <b>Lypd6</b>      | 23.51985 | 0.000126 | 0.000126 |
| <b>Lst1</b>       | 23.63745 | 0.000134 | 0.000134 |
| <b>Coq10b</b>     | 0.795965 | 0.000134 | 0.000134 |
| <b>Bcar3</b>      | 1.156796 | 0.000134 | 0.000134 |
| <b>C530043K1</b>  | 1.305508 | 0.000135 | 0.000135 |
| <b>Adgrl4</b>     | 0.363724 | 0.000149 | 0.000149 |
| <b>Sbf2</b>       | 0.712875 | 0.000149 | 0.000149 |
| <b>Gm43387</b>    | 23.60013 | 0.000146 | 0.000146 |
| <b>Cox8a</b>      | 0.379099 | 0.000154 | 0.000154 |
| <b>9330151L1</b>  | 23.59897 | 0.000157 | 0.000157 |
| <b>Rassf4</b>     | 0.922337 | 0.000158 | 0.000158 |

|                 |          |          |          |
|-----------------|----------|----------|----------|
| <b>Fus</b>      | 0.463575 | 0.000169 | 0.000169 |
| <b>Cmb1</b>     | 4.289754 | 0.000162 | 0.000162 |
| <b>Stt3b</b>    | 0.717438 | 0.000168 | 0.000168 |
| <b>Btg2</b>     | 0.48024  | 0.000168 | 0.000168 |
| <b>Fzd4</b>     | 0.545881 | 0.000171 | 0.000171 |
| <b>Pdgfc</b>    | 2.801671 | 0.000167 | 0.000167 |
| <b>Alas1</b>    | 0.528256 | 0.000181 | 0.000181 |
| <b>Stat5a</b>   | 4.22415  | 0.000175 | 0.000175 |
| <b>Ppp1r13l</b> | 3.694768 | 0.000178 | 0.000178 |
| <b>Hspa1b</b>   | 0.798107 | 0.00019  | 0.00019  |
| <b>Eno1</b>     | 0.619431 | 0.000195 | 0.000195 |
| <b>Ankrd50</b>  | 1.11184  | 0.000193 | 0.000193 |
| <b>Lcp2</b>     | 23.26037 | 0.000195 | 0.000195 |
| <b>Morrbid</b>  | 1.48643  | 0.000193 | 0.000193 |
| <b>Gm26802</b>  | 1.776496 | 0.000193 | 0.000193 |
| <b>Tcaf2</b>    | 1.926915 | 0.000193 | 0.000193 |
| <b>Rgcc</b>     | 0.61523  | 0.000202 | 0.000202 |
| <b>Chst1</b>    | 3.75839  | 0.000195 | 0.000195 |
| <b>Epb41</b>    | 0.660043 | 0.000204 | 0.000204 |
| <b>Lgals1</b>   | 1.10533  | 0.000202 | 0.000202 |
| <b>Polm</b>     | 4.096154 | 0.000206 | 0.000206 |
| <b>Adam11</b>   | 23.9577  | 0.000212 | 0.000212 |
| <b>Prrx1</b>    | 3.137805 | 0.000207 | 0.000207 |
| <b>Prorp</b>    | 1.102707 | 0.000213 | 0.000213 |
| <b>Bnip3</b>    | 0.621124 | 0.000218 | 0.000218 |
| <b>Mylip</b>    | 1.039429 | 0.000216 | 0.000216 |
| <b>Zfp217</b>   | 1.554185 | 0.000213 | 0.000213 |
| <b>Ncaph</b>    | 2.896689 | 0.000212 | 0.000212 |
| <b>Lamp2</b>    | 0.615939 | 0.000228 | 0.000228 |
| <b>Spata6l</b>  | 1.201306 | 0.000219 | 0.000219 |
| <b>Ppp1r14b</b> | 0.985911 | 0.000228 | 0.000228 |
| <b>Mxra8</b>    | 1.260982 | 0.000228 | 0.000228 |
| <b>Rcsd1</b>    | 1.211272 | 0.00023  | 0.00023  |
| <b>H1f0</b>     | 0.667305 | 0.00024  | 0.00024  |
| <b>Synm</b>     | 0.529774 | 0.000243 | 0.000243 |
| <b>Ppp1r15a</b> | 0.833896 | 0.000251 | 0.000251 |
| <b>Hnrnpa0</b>  | 0.522294 | 0.000257 | 0.000257 |
| <b>Clybl</b>    | 1.894473 | 0.000246 | 0.000246 |
| <b>Bag4</b>     | 1.333025 | 0.000255 | 0.000255 |
| <b>Zhx3</b>     | 0.911982 | 0.000263 | 0.000263 |
| <b>Maml3</b>    | 1.410947 | 0.000267 | 0.000267 |
| <b>Nfam1</b>    | 23.34817 | 0.000271 | 0.000271 |
| <b>Ramp2</b>    | 0.346819 | 0.000283 | 0.000283 |
| <b>Mfsd10</b>   | 1.103587 | 0.00028  | 0.00028  |
| <b>Slc16a12</b> | 2.767825 | 0.000273 | 0.000273 |
| <b>Dock9</b>    | 0.434637 | 0.000293 | 0.000293 |
| <b>Tcf23</b>    | 1.522148 | 0.000283 | 0.000283 |

|           |          |          |          |
|-----------|----------|----------|----------|
| Ddx59     | 3.618569 | 0.000281 | 0.000281 |
| Csf1      | 1.240026 | 0.000287 | 0.000287 |
| 4933431E2 | 2.673667 | 0.000281 | 0.000281 |
| Dennd5b   | 0.642512 | 0.000306 | 0.000306 |
| Daam2     | 1.448997 | 0.000308 | 0.000308 |
| Gm37465   | 22.79098 | 0.000311 | 0.000311 |
| Tcea3     | 1.458451 | 0.000309 | 0.000309 |
| Vat1      | 0.542908 | 0.000328 | 0.000328 |
| Use1      | 0.547012 | 0.000338 | 0.000338 |
| Rab20     | 23.43537 | 0.000339 | 0.000339 |
| Vmp1      | 0.905545 | 0.000342 | 0.000342 |
| Rapgef6   | 0.69578  | 0.000368 | 0.000368 |
| Ogn       | 1.597331 | 0.000357 | 0.000357 |
| Ptpn9     | 1.306231 | 0.000372 | 0.000372 |
| Atp8a1    | 0.694802 | 0.000373 | 0.000373 |
| Pald1     | 1.35588  | 0.000369 | 0.000369 |
| Plpp6     | 0.839774 | 0.000376 | 0.000376 |
| Pdp1      | 1.65008  | 0.000376 | 0.000376 |
| Fxyd5     | 0.341859 | 0.000408 | 0.000408 |
| 2210408F2 | 1.487603 | 0.000388 | 0.000388 |
| Dab1      | 2.662669 | 0.000388 | 0.000388 |
| Pdcd2l    | 1.662741 | 0.00039  | 0.00039  |
| BC055402  | 2.129575 | 0.000397 | 0.000397 |
| Prkch     | 0.637486 | 0.000417 | 0.000417 |
| Cds2      | 0.612927 | 0.000421 | 0.000421 |
| Tspan17   | 0.827484 | 0.000417 | 0.000417 |
| Gm44164   | 1.762425 | 0.000412 | 0.000412 |
| Acaa2     | 0.643028 | 0.000436 | 0.000436 |
| Heyl      | 2.053125 | 0.000417 | 0.000417 |
| Cdkn2aipn | 1.11806  | 0.000437 | 0.000437 |
| Cdc42ep3  | 0.615814 | 0.000461 | 0.000461 |
| Dlc1      | 0.464529 | 0.000468 | 0.000468 |
| Ddit4l    | 1.991505 | 0.00048  | 0.00048  |
| Ephx3     | 23.34103 | 0.000494 | 0.000494 |
| Tspan9    | 0.774948 | 0.000498 | 0.000498 |
| Lrp4      | 2.350575 | 0.000482 | 0.000482 |
| Nde1      | 0.765995 | 0.000502 | 0.000502 |
| Ppp1r9b   | 0.72362  | 0.000503 | 0.000503 |
| Sp3       | 0.545954 | 0.000516 | 0.000516 |
| Fxyd6     | 1.270617 | 0.000509 | 0.000509 |
| Adcy3     | 2.759988 | 0.000499 | 0.000499 |
| Mt2       | 1.729294 | 0.000505 | 0.000505 |
| Slc39a8   | 0.832347 | 0.000538 | 0.000538 |
| Abrac1    | 0.809702 | 0.000542 | 0.000542 |
| Hivep1    | 0.701057 | 0.000554 | 0.000554 |
| Pomgnt2   | 4.514136 | 0.000548 | 0.000548 |
| Atp5a1    | 0.430968 | 0.000571 | 0.000571 |



|                   |          |          |          |
|-------------------|----------|----------|----------|
| <b>Rps27a-ps:</b> | 1.567334 | 0.000557 | 0.000557 |
| <b>Itih5</b>      | 1.404827 | 0.000567 | 0.000567 |
| <b>Cxcl12</b>     | 0.531308 | 0.000591 | 0.000591 |
| <b>Appt</b>       | 0.783571 | 0.000581 | 0.000581 |
| <b>Tram2</b>      | 1.349472 | 0.000572 | 0.000572 |
| <b>Tns3</b>       | 0.952296 | 0.000588 | 0.000588 |
| <b>Hspa1a</b>     | 0.61724  | 0.000624 | 0.000624 |
| <b>H3c6</b>       | 22.93367 | 0.000621 | 0.000621 |
| <b>Acot7</b>      | 2.229149 | 0.000602 | 0.000602 |
| <b>Grm3</b>       | 3.915999 | 0.000613 | 0.000613 |
| <b>Ptprk</b>      | 0.860128 | 0.000641 | 0.000641 |
| <b>Birc3</b>      | 1.259731 | 0.000644 | 0.000644 |
| <b>Itpr2</b>      | 0.792857 | 0.000653 | 0.000653 |
| <b>Ppfibp1</b>    | 0.444693 | 0.000664 | 0.000664 |
| <b>Igfbp4</b>     | 1.046259 | 0.000667 | 0.000667 |
| <b>Pnp</b>        | 0.62061  | 0.000672 | 0.000672 |
| <b>Alg6</b>       | 1.59001  | 0.000651 | 0.000651 |
| <b>Nop53</b>      | 0.513436 | 0.000684 | 0.000684 |
| <b>Pice1</b>      | 1.082323 | 0.000667 | 0.000667 |
| <b>Bik</b>        | 23.11789 | 0.00069  | 0.00069  |
| <b>Tmsb4x</b>     | 0.206078 | 0.000727 | 0.000727 |
| <b>Kdsr</b>       | 0.841748 | 0.0007   | 0.0007   |
| <b>Fam210b</b>    | 1.10341  | 0.000692 | 0.000692 |
| <b>Wipf3</b>      | 2.704217 | 0.000678 | 0.000678 |
| <b>Ccdc8</b>      | 2.275488 | 0.000684 | 0.000684 |
| <b>2500002B1</b>  | 1.362221 | 0.000701 | 0.000701 |
| <b>Calcr1</b>     | 0.752709 | 0.000721 | 0.000721 |
| <b>Dcbld2</b>     | 1.045341 | 0.000725 | 0.000725 |
| <b>Gm43430</b>    | 3.004122 | 0.000713 | 0.000713 |
| <b>Dhfr</b>       | 2.216514 | 0.000722 | 0.000722 |
| <b>Rab11a</b>     | 0.421368 | 0.000776 | 0.000776 |
| <b>Abcb8</b>      | 2.369903 | 0.000742 | 0.000742 |
| <b>Atp1a2</b>     | 0.709282 | 0.00076  | 0.00076  |
| <b>Kdelr1</b>     | 0.600445 | 0.000781 | 0.000781 |
| <b>Mettl26</b>    | 0.905558 | 0.000782 | 0.000782 |
| <b>Gimap4</b>     | 1.084135 | 0.000781 | 0.000781 |
| <b>Ociad2</b>     | 23.11338 | 0.000805 | 0.000805 |
| <b>Piezo1</b>     | 0.757982 | 0.000813 | 0.000813 |
| <b>4833422C1</b>  | 2.878765 | 0.000806 | 0.000806 |
| <b>Gng7</b>       | 2.455699 | 0.000806 | 0.000806 |
| <b>Gale</b>       | 23.14506 | 0.000829 | 0.000829 |
| <b>Pfn2</b>       | 0.943357 | 0.000829 | 0.000829 |
| <b>Tmem45a</b>    | 3.012253 | 0.000815 | 0.000815 |
| <b>Egfr</b>       | 22.90797 | 0.000845 | 0.000845 |
| <b>Tent5a</b>     | 23.551   | 0.000848 | 0.000848 |
| <b>Pgap2</b>      | 1.16621  | 0.00085  | 0.00085  |
| <b>Marcksl1</b>   | 1.85691  | 0.000845 | 0.000845 |

|                  |          |          |          |
|------------------|----------|----------|----------|
| <b>Htatip2</b>   | 1.668329 | 0.000848 | 0.000848 |
| <b>Sil1</b>      | 1.122264 | 0.00085  | 0.00085  |
| <b>Stx3</b>      | 0.626509 | 0.000896 | 0.000896 |
| <b>Krtcap2</b>   | 0.428696 | 0.000915 | 0.000915 |
| <b>Dcbld1</b>    | 1.829926 | 0.000887 | 0.000887 |
| <b>Tbl1xr1</b>   | 0.852067 | 0.00092  | 0.00092  |
| <b>4930581F2</b> | 0.878856 | 0.000923 | 0.000923 |
| <b>A930033H</b>  | 1.395939 | 0.000915 | 0.000915 |
| <b>Irf2bpl</b>   | 0.476674 | 0.000953 | 0.000953 |
| <b>Arhgef7</b>   | 0.807644 | 0.000948 | 0.000948 |
| <b>Prex2</b>     | 0.472591 | 0.000958 | 0.000958 |
| <b>Fxyd7</b>     | 1.763812 | 0.00092  | 0.00092  |
| <b>C4b</b>       | 22.99696 | 0.00095  | 0.00095  |
| <b>Flt4</b>      | 0.645816 | 0.000987 | 0.000987 |
| <b>Pak3</b>      | 2.171925 | 0.000958 | 0.000958 |
| <b>Ago2</b>      | 0.755332 | 0.001004 | 0.001004 |
| <b>Dtx3</b>      | 0.768083 | 0.00101  | 0.00101  |
| <b>Fam160b1</b>  | 0.723961 | 0.001027 | 0.001027 |
| <b>Rbm3</b>      | 0.417813 | 0.001064 | 0.001064 |
| <b>Gm46404</b>   | 3.489813 | 0.001027 | 0.001027 |
| <b>Bcl3</b>      | 1.072264 | 0.001049 | 0.001049 |
| <b>Per1</b>      | 0.75     | 0.001078 | 0.001078 |
| <b>Bmpr1a</b>    | 1.134144 | 0.001061 | 0.001061 |
| <b>Ldhb</b>      | 0.814447 | 0.001089 | 0.001089 |
| <b>Omd</b>       | 2.861936 | 0.001078 | 0.001078 |
| <b>Slc1a4</b>    | 23.84592 | 0.001113 | 0.001113 |
| <b>Gm31166</b>   | 3.614013 | 0.001121 | 0.001121 |
| <b>Ebf2</b>      | 2.464875 | 0.001121 | 0.001121 |
| <b>Cdk6</b>      | 1.355583 | 0.001154 | 0.001154 |
| <b>Chmp4b</b>    | 0.532838 | 0.001178 | 0.001178 |
| <b>Atp5d</b>     | 0.43992  | 0.001194 | 0.001194 |
| <b>Lmbr1</b>     | 1.029075 | 0.001187 | 0.001187 |
| <b>Zc3hav1l</b>  | 3.594394 | 0.001186 | 0.001186 |
| <b>Rara</b>      | 0.975821 | 0.001208 | 0.001208 |
| <b>Vsig2</b>     | 1.321557 | 0.001184 | 0.001184 |
| <b>Eif3i</b>     | 0.607941 | 0.00127  | 0.00127  |
| <b>Gm37080</b>   | 2.871765 | 0.00129  | 0.00129  |
| <b>Tepp</b>      | 4.105176 | 0.00135  | 0.00135  |
| <b>Mapk9</b>     | 0.898359 | 0.001385 | 0.001385 |
| <b>Mospd1</b>    | 0.775215 | 0.001427 | 0.001427 |
| <b>Rbbp7</b>     | 0.595298 | 0.001451 | 0.001451 |
| <b>Akr1b8</b>    | 22.51147 | 0.001445 | 0.001445 |
| <b>Vcam1</b>     | 0.795914 | 0.001462 | 0.001462 |
| <b>Rnf165</b>    | 2.508307 | 0.001448 | 0.001448 |
| <b>Smarcd3</b>   | 2.252903 | 0.001455 | 0.001455 |
| <b>Plppr2</b>    | 2.768444 | 0.001467 | 0.001467 |
| <b>Ptp4a2</b>    | 0.388157 | 0.001536 | 0.001536 |

|                 |          |          |          |
|-----------------|----------|----------|----------|
| <b>Cdh2</b>     | 1.050286 | 0.001525 | 0.001525 |
| <b>Gabarap</b>  | 0.380075 | 0.00157  | 0.00157  |
| <b>F2r</b>      | 1.788152 | 0.001535 | 0.001535 |
| <b>Cmip</b>     | 0.658209 | 0.001595 | 0.001595 |
| <b>Casp4</b>    | 1.627265 | 0.00157  | 0.00157  |
| <b>Acadsb</b>   | 0.931173 | 0.001587 | 0.001587 |
| <b>Prelp</b>    | 1.613509 | 0.001602 | 0.001602 |
| <b>Sys1</b>     | 0.618598 | 0.001623 | 0.001623 |
| <b>Ptma</b>     | 0.246921 | 0.001681 | 0.001681 |
| <b>Degs1</b>    | 0.836037 | 0.001615 | 0.001615 |
| <b>Zfp467</b>   | 1.030744 | 0.001631 | 0.001631 |
| <b>C430049B</b> | 2.526777 | 0.001598 | 0.001598 |
| <b>Tbx3os1</b>  | 1.604866 | 0.001631 | 0.001631 |
| <b>Apbb2</b>    | 0.446756 | 0.001675 | 0.001675 |
| <b>Fam104a</b>  | 0.577534 | 0.001715 | 0.001715 |
| <b>Pear1</b>    | 0.80755  | 0.001726 | 0.001726 |
| <b>Pxdc1</b>    | 0.850554 | 0.001722 | 0.001722 |
| <b>Trmt9b</b>   | 2.761999 | 0.001742 | 0.001742 |
| <b>Nuak2</b>    | 2.061447 | 0.001779 | 0.001779 |
| <b>Lpcat3</b>   | 0.721642 | 0.001864 | 0.001864 |
| <b>Gm43336</b>  | 1.704029 | 0.001835 | 0.001835 |
| <b>Pttg1ip</b>  | 0.438085 | 0.001896 | 0.001896 |
| <b>Aldh6a1</b>  | 1.170026 | 0.001857 | 0.001857 |
| <b>C630043F</b> | 3.316666 | 0.001835 | 0.001835 |
| <b>Lacc1</b>    | 22.87207 | 0.001879 | 0.001879 |
| <b>Hint1</b>    | 0.34466  | 0.001954 | 0.001954 |
| <b>Snhg18</b>   | 1.087364 | 0.001942 | 0.001942 |
| <b>Zfp521</b>   | 1.195648 | 0.001988 | 0.001988 |
| <b>Mt3</b>      | 1.478125 | 0.002007 | 0.002007 |
| <b>Ldha</b>     | 0.390859 | 0.002073 | 0.002073 |
| <b>Luzp2</b>    | 3.183075 | 0.002019 | 0.002019 |
| <b>Bnip3l</b>   | 0.404466 | 0.002098 | 0.002098 |
| <b>Vat1l</b>    | 1.856937 | 0.002019 | 0.002019 |
| <b>Pecr</b>     | 2.909651 | 0.002034 | 0.002034 |
| <b>Slco3a1</b>  | 1.295123 | 0.002073 | 0.002073 |
| <b>Pygl</b>     | 2.132012 | 0.002056 | 0.002056 |
| <b>Ctsa</b>     | 0.666831 | 0.002098 | 0.002098 |
| <b>Dzip1l</b>   | 2.740874 | 0.002074 | 0.002074 |
| <b>Gm12992</b>  | 22.97789 | 0.002174 | 0.002174 |
| <b>Uqcrfs1</b>  | 0.603929 | 0.002195 | 0.002195 |
| <b>Car14</b>    | 1.47431  | 0.002161 | 0.002161 |
| <b>Col5a3</b>   | 2.278347 | 0.002156 | 0.002156 |
| <b>Atoh8</b>    | 1.116994 | 0.002223 | 0.002223 |
| <b>Tead1</b>    | 0.743749 | 0.002267 | 0.002267 |
| <b>C1ra</b>     | 1.814243 | 0.002221 | 0.002221 |
| <b>Trib3</b>    | 1.741154 | 0.002224 | 0.002224 |
| <b>Tcp1</b>     | 0.587467 | 0.002301 | 0.002301 |

|                  |          |          |          |
|------------------|----------|----------|----------|
| <b>Acadl</b>     | 0.561879 | 0.002316 | 0.002316 |
| <b>Mgat3</b>     | 2.617575 | 0.002292 | 0.002292 |
| <b>Aldoc</b>     | 0.832396 | 0.002346 | 0.002346 |
| <b>Mgmt</b>      | 2.04953  | 0.002356 | 0.002356 |
| <b>Aqp11</b>     | 0.504429 | 0.002486 | 0.002486 |
| <b>Rnd3</b>      | 1.973936 | 0.002426 | 0.002426 |
| <b>Lgals3</b>    | 23.47756 | 0.00248  | 0.00248  |
| <b>Arl2</b>      | 0.725828 | 0.002492 | 0.002492 |
| <b>Kifc3</b>     | 0.750507 | 0.002544 | 0.002544 |
| <b>Nsg1</b>      | 2.372569 | 0.002496 | 0.002496 |
| <b>Cpne3</b>     | 0.563428 | 0.002577 | 0.002577 |
| <b>Alad</b>      | 0.982916 | 0.002633 | 0.002633 |
| <b>Nr5a2</b>     | 1.964079 | 0.002599 | 0.002599 |
| <b>Al429214</b>  | 22.82405 | 0.002675 | 0.002675 |
| <b>Cobl</b>      | 23.14475 | 0.002708 | 0.002708 |
| <b>Mrgbp</b>     | 1.007235 | 0.002688 | 0.002688 |
| <b>Pla2g4a</b>   | 1.054763 | 0.002716 | 0.002716 |
| <b>Lyz2</b>      | 3.013163 | 0.00275  | 0.00275  |
| <b>Bicc1</b>     | 1.558019 | 0.002785 | 0.002785 |
| <b>Rabepk</b>    | 1.251994 | 0.002796 | 0.002796 |
| <b>Casp8</b>     | 0.730119 | 0.002808 | 0.002808 |
| <b>Dbi</b>       | 0.393218 | 0.00285  | 0.00285  |
| <b>Leprot</b>    | 0.530354 | 0.002878 | 0.002878 |
| <b>Etnppl</b>    | 2.342219 | 0.002798 | 0.002798 |
| <b>Klk8</b>      | 2.272925 | 0.002801 | 0.002801 |
| <b>Ift43</b>     | 0.878763 | 0.00285  | 0.00285  |
| <b>Peli2</b>     | 1.034171 | 0.00285  | 0.00285  |
| <b>Rpl15-ps2</b> | 3.032722 | 0.002821 | 0.002821 |
| <b>Mettl21a</b>  | 1.852018 | 0.00285  | 0.00285  |
| <b>Adssl1</b>    | 3.221327 | 0.002861 | 0.002861 |
| <b>Gmfg</b>      | 3.615888 | 0.00288  | 0.00288  |
| <b>Sorbs3</b>    | 0.666672 | 0.002944 | 0.002944 |
| <b>Ubash3b</b>   | 22.86399 | 0.002963 | 0.002963 |
| <b>Smg8</b>      | 1.713924 | 0.002938 | 0.002938 |
| <b>Atp5mpl</b>   | 0.468658 | 0.003025 | 0.003025 |
| <b>Dynlt1c</b>   | 22.55723 | 0.003007 | 0.003007 |
| <b>Coa8</b>      | 0.75096  | 0.003041 | 0.003041 |
| <b>Ost4</b>      | 0.450843 | 0.003083 | 0.003083 |
| <b>Pold4</b>     | 0.733733 | 0.003075 | 0.003075 |
| <b>Oxa1l</b>     | 0.849234 | 0.00306  | 0.00306  |
| <b>Yipf3</b>     | 0.747137 | 0.003059 | 0.003059 |
| <b>H1f4</b>      | 0.98845  | 0.00306  | 0.00306  |
| <b>Ptbp3</b>     | 0.422148 | 0.003145 | 0.003145 |
| <b>Eci2</b>      | 0.548597 | 0.003145 | 0.003145 |
| <b>Rab11fip1</b> | 1.284883 | 0.003079 | 0.003079 |
| <b>Ddt</b>       | 0.701125 | 0.003178 | 0.003178 |
| <b>Tagln3</b>    | 22.93655 | 0.003167 | 0.003167 |

|                 |          |          |          |
|-----------------|----------|----------|----------|
| <b>Irx3</b>     | 0.517232 | 0.003208 | 0.003208 |
| <b>Fkbp15</b>   | 0.926415 | 0.003189 | 0.003189 |
| <b>Gfra2</b>    | 1.815217 | 0.003174 | 0.003174 |
| <b>Dlst</b>     | 0.838913 | 0.003239 | 0.003239 |
| <b>Tcirg1</b>   | 1.230309 | 0.003239 | 0.003239 |
| <b>Scarb1</b>   | 0.553741 | 0.003356 | 0.003356 |
| <b>Clic1</b>    | 0.362501 | 0.003376 | 0.003376 |
| <b>Prkg1</b>    | 1.067944 | 0.003326 | 0.003326 |
| <b>Sfn</b>      | 3.055428 | 0.00328  | 0.00328  |
| <b>Rasa3</b>    | 2.828558 | 0.003338 | 0.003338 |
| <b>Fam168a</b>  | 0.633351 | 0.0034   | 0.0034   |
| <b>Dock10</b>   | 1.941031 | 0.003338 | 0.003338 |
| <b>Anp32b</b>   | 0.459581 | 0.003489 | 0.003489 |
| <b>Gpi1</b>     | 0.431875 | 0.003528 | 0.003528 |
| <b>Paqr3</b>    | 3.654548 | 0.003447 | 0.003447 |
| <b>Vstm4</b>    | 1.40526  | 0.003536 | 0.003536 |
| <b>Cd27</b>     | 23.2148  | 0.003553 | 0.003553 |
| <b>Gm5292</b>   | 1.279547 | 0.003536 | 0.003536 |
| <b>Magi1</b>    | 1.000894 | 0.003545 | 0.003545 |
| <b>Mtus1</b>    | 0.420233 | 0.003647 | 0.003647 |
| <b>Slc30a10</b> | 1.890392 | 0.003555 | 0.003555 |
| <b>Taf7</b>     | 0.715728 | 0.003629 | 0.003629 |
| <b>Mgarp</b>    | 0.536259 | 0.003625 | 0.003625 |
| <b>Zfp526</b>   | 23.32697 | 0.003733 | 0.003733 |
| <b>Eps8</b>     | 1.047825 | 0.003758 | 0.003758 |
| <b>Cox6b2</b>   | 1.809265 | 0.003692 | 0.003692 |
| <b>Chic2</b>    | 0.598219 | 0.003824 | 0.003824 |
| <b>Ambra1</b>   | 1.310138 | 0.003825 | 0.003825 |
| <b>Slc38a11</b> | 1.447191 | 0.003884 | 0.003884 |
| <b>Pid1</b>     | 1.065773 | 0.003901 | 0.003901 |
| <b>Eef1d</b>    | 0.436207 | 0.003958 | 0.003958 |
| <b>Gnaq</b>     | 0.482948 | 0.003961 | 0.003961 |
| <b>Mphosph9</b> | 1.283561 | 0.003917 | 0.003917 |
| <b>Macroh2a</b> | 2.646419 | 0.003904 | 0.003904 |
| <b>Trp53i11</b> | 1.620113 | 0.003931 | 0.003931 |
| <b>4921515G</b> | 23.39259 | 0.003973 | 0.003973 |
| <b>Basp1</b>    | 1.263269 | 0.003966 | 0.003966 |
| <b>Foxo1</b>    | 0.560075 | 0.004044 | 0.004044 |
| <b>Pacsin3</b>  | 1.64892  | 0.004008 | 0.004008 |
| <b>Sirpa</b>    | 1.720878 | 0.004035 | 0.004035 |
| <b>Plscr3</b>   | 0.666884 | 0.00415  | 0.00415  |
| <b>Hsd17b10</b> | 0.795087 | 0.004169 | 0.004169 |
| <b>Fech</b>     | 1.116681 | 0.004165 | 0.004165 |
| <b>Spred1</b>   | 0.834648 | 0.004257 | 0.004257 |
| <b>Tagln2</b>   | 0.357418 | 0.004301 | 0.004301 |
| <b>Zbtb45</b>   | 1.50957  | 0.004212 | 0.004212 |
| <b>Fat1</b>     | 2.099968 | 0.004215 | 0.004215 |

|                  |          |          |          |
|------------------|----------|----------|----------|
| <b>Agtrap</b>    | 0.79061  | 0.004302 | 0.004302 |
| <b>Mif</b>       | 0.443854 | 0.00434  | 0.00434  |
| <b>1700003F1</b> | 23.08327 | 0.004302 | 0.004302 |
| <b>Pth1r</b>     | 1.230956 | 0.004325 | 0.004325 |
| <b>Atp13a5</b>   | 1.746108 | 0.004286 | 0.004286 |
| <b>Brk1</b>      | 0.433642 | 0.004439 | 0.004439 |
| <b>Gm45266</b>   | 3.087854 | 0.004325 | 0.004325 |
| <b>Wasf2</b>     | 0.3474   | 0.004485 | 0.004485 |
| <b>Gm42991</b>   | 22.92025 | 0.004439 | 0.004439 |
| <b>Ccdc160</b>   | 2.992465 | 0.004394 | 0.004394 |
| <b>Tnfrsf12a</b> | 0.746543 | 0.004468 | 0.004468 |
| <b>Thap3</b>     | 0.673005 | 0.004545 | 0.004545 |
| <b>Sik1</b>      | 0.565076 | 0.004597 | 0.004597 |
| <b>Arpc1b</b>    | 0.341662 | 0.004684 | 0.004684 |
| <b>Cdc14a</b>    | 0.708019 | 0.004677 | 0.004677 |
| <b>Spsb1</b>     | 1.118131 | 0.004638 | 0.004638 |
| <b>Tcta</b>      | 1.037872 | 0.004684 | 0.004684 |
| <b>H1f2</b>      | 0.511575 | 0.004775 | 0.004775 |
| <b>Wfs1</b>      | 1.574981 | 0.004685 | 0.004685 |
| <b>Aplp1</b>     | 1.250542 | 0.004714 | 0.004714 |
| <b>Eif3k</b>     | 0.399472 | 0.004832 | 0.004832 |
| <b>Gpx3</b>      | 2.126075 | 0.00474  | 0.00474  |
| <b>Zscan21</b>   | 1.35191  | 0.004903 | 0.004903 |
| <b>Ciao3</b>     | 1.445276 | 0.004894 | 0.004894 |
| <b>9530078K1</b> | 22.66694 | 0.005042 | 0.005042 |
| <b>Nlrc3</b>     | 22.97927 | 0.005071 | 0.005071 |
| <b>Rasl10a</b>   | 1.928135 | 0.005041 | 0.005041 |
| <b>H2az1</b>     | 0.354619 | 0.0052   | 0.0052   |
| <b>D230049E1</b> | 22.73365 | 0.00514  | 0.00514  |
| <b>Ccdc68</b>    | 22.64318 | 0.00514  | 0.00514  |
| <b>Rgma</b>      | 2.058651 | 0.005151 | 0.005151 |
| <b>Lgalsl</b>    | 0.566801 | 0.005342 | 0.005342 |
| <b>E230001N1</b> | 2.373723 | 0.005268 | 0.005268 |
| <b>Map3k14</b>   | 1.948412 | 0.005268 | 0.005268 |
| <b>Rb1</b>       | 0.703613 | 0.005368 | 0.005368 |
| <b>Atp10d</b>    | 0.635327 | 0.005415 | 0.005415 |
| <b>Atp7a</b>     | 0.79905  | 0.005417 | 0.005417 |
| <b>Ldhd</b>      | 3.820182 | 0.005368 | 0.005368 |
| <b>Dapk1</b>     | 1.302167 | 0.005368 | 0.005368 |
| <b>Fbxo6</b>     | 0.831817 | 0.005416 | 0.005416 |
| <b>Rassf1</b>    | 0.516826 | 0.005483 | 0.005483 |
| <b>Synpr</b>     | 2.125069 | 0.005441 | 0.005441 |
| <b>Fam189a2</b>  | 0.781397 | 0.005638 | 0.005638 |
| <b>Raly</b>      | 0.458923 | 0.005701 | 0.005701 |
| <b>Dock5</b>     | 2.348774 | 0.005553 | 0.005553 |
| <b>Asns</b>      | 2.668444 | 0.005573 | 0.005573 |
| <b>Fbxl12</b>    | 1.104432 | 0.005621 | 0.005621 |

|                 |          |          |          |
|-----------------|----------|----------|----------|
| <b>Dclre1a</b>  | 1.943675 | 0.005638 | 0.005638 |
| <b>Eif3e</b>    | 0.40908  | 0.006001 | 0.006001 |
| <b>Aifm2</b>    | 1.760958 | 0.005872 | 0.005872 |
| <b>Arl4d</b>    | 0.616796 | 0.006001 | 0.006001 |
| <b>Utp15</b>    | 1.288306 | 0.005968 | 0.005968 |
| <b>Man2a1</b>   | 0.83938  | 0.006128 | 0.006128 |
| <b>Pmm1</b>     | 0.777538 | 0.006113 | 0.006113 |
| <b>Cep170b</b>  | 2.105873 | 0.00606  | 0.00606  |
| <b>Hpcal1</b>   | 0.559946 | 0.006182 | 0.006182 |
| <b>Grina</b>    | 0.547933 | 0.006334 | 0.006334 |
| <b>Rgp1</b>     | 1.28975  | 0.006236 | 0.006236 |
| <b>Fads3</b>    | 1.777389 | 0.006346 | 0.006346 |
| <b>Cacna1h</b>  | 2.150674 | 0.006278 | 0.006278 |
| <b>Arid3a</b>   | 1.311099 | 0.006414 | 0.006414 |
| <b>Rilpl1</b>   | 0.717826 | 0.006463 | 0.006463 |
| <b>Rpl3-ps1</b> | 1.346987 | 0.006417 | 0.006417 |
| <b>Arsb</b>     | 1.291204 | 0.00655  | 0.00655  |
| <b>Resf1</b>    | 0.650116 | 0.006662 | 0.006662 |
| <b>Alg8</b>     | 22.73131 | 0.006634 | 0.006634 |
| <b>Zranb1</b>   | 0.59108  | 0.006662 | 0.006662 |
| <b>Pde8b</b>    | 0.890983 | 0.006687 | 0.006687 |
| <b>Srsf5</b>    | 0.338562 | 0.006777 | 0.006777 |
| <b>Tlcd4</b>    | 22.59309 | 0.006687 | 0.006687 |
| <b>Klhl2</b>    | 0.575666 | 0.006866 | 0.006866 |
| <b>Tmem38a</b>  | 2.138412 | 0.006755 | 0.006755 |
| <b>Mrpl1</b>    | 1.169746 | 0.006822 | 0.006822 |
| <b>Kcnmb4</b>   | 3.104367 | 0.006792 | 0.006792 |
| <b>Lym1</b>     | 0.880436 | 0.006894 | 0.006894 |
| <b>Tirap</b>    | 0.83235  | 0.006878 | 0.006878 |
| <b>Mxd4</b>     | 0.37195  | 0.007033 | 0.007033 |
| <b>Nos2</b>     | 2.996022 | 0.006866 | 0.006866 |
| <b>Lhfp</b>     | 0.925929 | 0.007051 | 0.007051 |
| <b>Ube2e1</b>   | 0.688421 | 0.007068 | 0.007068 |
| <b>Rasal2</b>   | 0.543409 | 0.007068 | 0.007068 |
| <b>Col5a1</b>   | 22.29501 | 0.007068 | 0.007068 |
| <b>Gm5148</b>   | 2.072899 | 0.006973 | 0.006973 |
| <b>Abhd3</b>    | 22.90383 | 0.007068 | 0.007068 |
| <b>Arl6ip5</b>  | 0.405445 | 0.007226 | 0.007226 |
| <b>Samd5</b>    | 1.979026 | 0.007081 | 0.007081 |
| <b>Egflam</b>   | 1.084186 | 0.007209 | 0.007209 |
| <b>Sash1</b>    | 0.439706 | 0.007267 | 0.007267 |
| <b>Sema3c</b>   | 0.455226 | 0.007267 | 0.007267 |
| <b>Cerox1</b>   | 2.962902 | 0.007119 | 0.007119 |
| <b>Ctdsp2</b>   | 0.479015 | 0.007347 | 0.007347 |
| <b>Flrt2</b>    | 1.673287 | 0.007267 | 0.007267 |
| <b>Gldc</b>     | 22.34123 | 0.007368 | 0.007368 |
| <b>Agap2</b>    | 3.5967   | 0.007368 | 0.007368 |

|                 |          |          |          |
|-----------------|----------|----------|----------|
| <b>Sharpin</b>  | 0.828263 | 0.007476 | 0.007476 |
| <b>4930515G</b> | 3.90722  | 0.007485 | 0.007485 |
| <b>Mmd</b>      | 0.733646 | 0.007593 | 0.007593 |
| <b>Cyp1b1</b>   | 23.13065 | 0.007585 | 0.007585 |
| <b>Insr</b>     | 0.432838 | 0.00779  | 0.00779  |
| <b>Dkk3</b>     | 0.89036  | 0.007675 | 0.007675 |
| <b>Gm42443</b>  | 22.99919 | 0.007798 | 0.007798 |
| <b>Mrps18b</b>  | 1.302365 | 0.00779  | 0.00779  |
| <b>Coro7</b>    | 1.335036 | 0.007861 | 0.007861 |
| <b>Armxcx2</b>  | 0.902142 | 0.007914 | 0.007914 |
| <b>Rtn2</b>     | 1.66395  | 0.00798  | 0.00798  |
| <b>Ahdc1</b>    | 0.984395 | 0.008122 | 0.008122 |
| <b>Nelfe</b>    | 0.93414  | 0.008072 | 0.008072 |
| <b>Wdr89</b>    | 0.989478 | 0.008153 | 0.008153 |
| <b>Slc25a30</b> | 0.871575 | 0.008262 | 0.008262 |
| <b>Stat6</b>    | 0.831886 | 0.008225 | 0.008225 |
| <b>Rictor</b>   | 0.507614 | 0.008254 | 0.008254 |
| <b>Rad50</b>    | 0.835709 | 0.008254 | 0.008254 |
| <b>Pag1</b>     | 2.794869 | 0.008165 | 0.008165 |
| <b>Cbr3</b>     | 1.124168 | 0.008254 | 0.008254 |
| <b>Atp1b2</b>   | 0.571395 | 0.008387 | 0.008387 |
| <b>Zfp1</b>     | 1.356493 | 0.008326 | 0.008326 |
| <b>Cyp27a1</b>  | 22.38663 | 0.008393 | 0.008393 |
| <b>Hk1os</b>    | 22.56071 | 0.008557 | 0.008557 |
| <b>Tmem131l</b> | 2.380901 | 0.008476 | 0.008476 |
| <b>Gm26935</b>  | 22.93079 | 0.008599 | 0.008599 |
| <b>Dock4</b>    | 0.501088 | 0.008714 | 0.008714 |
| <b>Egln1</b>    | 0.533122 | 0.008741 | 0.008741 |
| <b>Plcl1</b>    | 1.313253 | 0.00869  | 0.00869  |
| <b>Pcnx</b>     | 0.475559 | 0.008766 | 0.008766 |
| <b>Rhobtb3</b>  | 1.303041 | 0.008745 | 0.008745 |
| <b>Tmem158</b>  | 1.654356 | 0.008745 | 0.008745 |
| <b>Gm49759</b>  | 22.86764 | 0.008869 | 0.008869 |
| <b>Fgf11</b>    | 2.816402 | 0.00875  | 0.00875  |
| <b>Eif3h</b>    | 0.358063 | 0.009121 | 0.009121 |
| <b>Plekho1</b>  | 1.104498 | 0.009019 | 0.009019 |
| <b>Zfp46</b>    | 1.062667 | 0.009068 | 0.009068 |
| <b>Rpp40</b>    | 3.346808 | 0.009121 | 0.009121 |
| <b>Fbxo3</b>    | 0.592617 | 0.009239 | 0.009239 |
| <b>Sp3os</b>    | 0.907875 | 0.009315 | 0.009315 |
| <b>Ppil2</b>    | 0.817193 | 0.009329 | 0.009329 |
| <b>6030400A</b> | 3.083372 | 0.009346 | 0.009346 |
| <b>Cux1</b>     | 0.581261 | 0.009544 | 0.009544 |
| <b>Zfp383</b>   | 1.779634 | 0.009397 | 0.009397 |
| <b>Rap1a</b>    | 0.416813 | 0.009636 | 0.009636 |
| <b>Rem1</b>     | 1.732246 | 0.00945  | 0.00945  |
| <b>Kazn</b>     | 1.395067 | 0.009637 | 0.009637 |



|                 |          |          |          |
|-----------------|----------|----------|----------|
| <b>Hmx1</b>     | 22.88524 | 0.009854 | 0.009854 |
| <b>Gdi2</b>     | 0.408664 | 0.009964 | 0.009964 |
| <b>Drap1</b>    | 0.42116  | 0.010054 | 0.010054 |
| <b>Gm12987</b>  | 22.0762  | 0.009964 | 0.009964 |
| <b>Ercc1</b>    | 0.81395  | 0.009964 | 0.009964 |
| <b>Pigs</b>     | 1.241515 | 0.009933 | 0.009933 |
| <b>Kctd17</b>   | 0.776303 | 0.010184 | 0.010184 |
| <b>Adipor2</b>  | 0.387836 | 0.010263 | 0.010263 |
| <b>Ezh2</b>     | 1.178279 | 0.010222 | 0.010222 |
| <b>Vav3</b>     | 22.40902 | 0.010271 | 0.010271 |
| <b>Nanos1</b>   | 1.420584 | 0.010222 | 0.010222 |
| <b>Pde1a</b>    | 1.809631 | 0.010222 | 0.010222 |
| <b>Abcc1</b>    | 1.183533 | 0.010222 | 0.010222 |
| <b>Itpr12</b>   | 0.679357 | 0.010477 | 0.010477 |
| <b>Tmem189</b>  | 0.672674 | 0.010423 | 0.010423 |
| <b>Zfp319</b>   | 0.995953 | 0.010477 | 0.010477 |
| <b>Usp35</b>    | 22.71344 | 0.010491 | 0.010491 |
| <b>Itm2b</b>    | 0.191542 | 0.010723 | 0.010723 |
| <b>Doc2g</b>    | 23.11357 | 0.010616 | 0.010616 |
| <b>Gng11</b>    | 0.321043 | 0.010895 | 0.010895 |
| <b>Srp72</b>    | 0.539931 | 0.010869 | 0.010869 |
| <b>Etf1d</b>    | 0.83374  | 0.010808 | 0.010808 |
| <b>Sbk1</b>     | 1.746053 | 0.010754 | 0.010754 |
| <b>Pde3b</b>    | 22.59132 | 0.010895 | 0.010895 |
| <b>Pds5b</b>    | 0.576107 | 0.010936 | 0.010936 |
| <b>1700017B</b> | 1.807562 | 0.010874 | 0.010874 |
| <b>Dusp18</b>   | 2.299509 | 0.010916 | 0.010916 |
| <b>Ppp5c</b>    | 0.851342 | 0.011271 | 0.011271 |
| <b>Grb7</b>     | 1.864617 | 0.011338 | 0.011338 |
| <b>Fiz1</b>     | 1.110253 | 0.011403 | 0.011403 |
| <b>Ppp1r14a</b> | 0.961731 | 0.011541 | 0.011541 |
| <b>Klf6</b>     | 0.34005  | 0.011621 | 0.011621 |
| <b>Cpm</b>      | 0.989552 | 0.011611 | 0.011611 |
| <b>Cox7c</b>    | 0.323348 | 0.01175  | 0.01175  |
| <b>Prrg3</b>    | 2.287223 | 0.011535 | 0.011535 |
| <b>Gm16201</b>  | 22.20978 | 0.011649 | 0.011649 |
| <b>Elovl6</b>   | 1.824846 | 0.01175  | 0.01175  |
| <b>Itgb2</b>    | 22.39186 | 0.01191  | 0.01191  |
| <b>Bcl6</b>     | 1.100835 | 0.011935 | 0.011935 |
| <b>Vsx2</b>     | 1.663693 | 0.011849 | 0.011849 |
| <b>Agpat5</b>   | 0.715344 | 0.012073 | 0.012073 |
| <b>Ppm1k</b>    | 1.086006 | 0.01206  | 0.01206  |
| <b>Klhl42</b>   | 1.238253 | 0.012155 | 0.012155 |
| <b>Atf7ip</b>   | 0.513161 | 0.012336 | 0.012336 |
| <b>Impdh1</b>   | 0.451783 | 0.012455 | 0.012455 |
| <b>Pfkf</b>     | 0.536322 | 0.012479 | 0.012479 |
| <b>Mapk12</b>   | 0.744936 | 0.012522 | 0.012522 |

|                  |          |          |          |
|------------------|----------|----------|----------|
| <b>Slc7a2</b>    | 3.461345 | 0.012461 | 0.012461 |
| <b>Atp6v1g1</b>  | 0.365666 | 0.012752 | 0.012752 |
| <b>Lgals4</b>    | 1.384183 | 0.012523 | 0.012523 |
| <b>Zfp341</b>    | 3.144719 | 0.012559 | 0.012559 |
| <b>Enpp2</b>     | 0.988214 | 0.012697 | 0.012697 |
| <b>D730045B</b>  | 22.62995 | 0.012755 | 0.012755 |
| <b>Marchf7</b>   | 0.490824 | 0.012869 | 0.012869 |
| <b>Wipi1</b>     | 0.641298 | 0.012849 | 0.012849 |
| <b>Gm37060</b>   | 1.124121 | 0.01287  | 0.01287  |
| <b>Pdxdc1</b>    | 0.622751 | 0.012903 | 0.012903 |
| <b>Mcam</b>      | 0.611928 | 0.013437 | 0.013437 |
| <b>Tspan15</b>   | 1.506017 | 0.013353 | 0.013353 |
| <b>Gm43672</b>   | 2.411745 | 0.013347 | 0.013347 |
| <b>Rap1b</b>     | 0.351222 | 0.013747 | 0.013747 |
| <b>Ndr1</b>      | 0.3307   | 0.013753 | 0.013753 |
| <b>Aars</b>      | 0.957249 | 0.013654 | 0.013654 |
| <b>Slc22a23</b>  | 22.53236 | 0.013758 | 0.013758 |
| <b>Oaf</b>       | 2.083288 | 0.013758 | 0.013758 |
| <b>Stard5</b>    | 1.285472 | 0.013773 | 0.013773 |
| <b>Nfatc4</b>    | 1.203162 | 0.013897 | 0.013897 |
| <b>Ing1</b>      | 0.532237 | 0.014015 | 0.014015 |
| <b>1110002L0</b> | 1.47553  | 0.013967 | 0.013967 |
| <b>Rab12</b>     | 0.426476 | 0.01419  | 0.01419  |
| <b>Sfxn1</b>     | 0.749369 | 0.01419  | 0.01419  |
| <b>Ppm1j</b>     | 2.214546 | 0.013937 | 0.013937 |
| <b>Cdr2l</b>     | 1.176647 | 0.014164 | 0.014164 |
| <b>Lysmd2</b>    | 0.461743 | 0.014455 | 0.014455 |
| <b>Slitrk2</b>   | 22.45411 | 0.014575 | 0.014575 |
| <b>Sh3bgrl2</b>  | 1.070199 | 0.014641 | 0.014641 |
| <b>Ube2r2</b>    | 0.452178 | 0.014773 | 0.014773 |
| <b>Chrna1os</b>  | 22.77713 | 0.014708 | 0.014708 |
| <b>Cracr2b</b>   | 0.438394 | 0.014773 | 0.014773 |
| <b>Gm42544</b>   | 22.604   | 0.014724 | 0.014724 |
| <b>Il2rg</b>     | 0.982735 | 0.014718 | 0.014718 |
| <b>Gm45495</b>   | 3.187988 | 0.014644 | 0.014644 |
| <b>Rusc1</b>     | 0.776059 | 0.014773 | 0.014773 |
| <b>Tacc3</b>     | 22.55419 | 0.014773 | 0.014773 |
| <b>Rrad</b>      | 2.387636 | 0.014676 | 0.014676 |
| <b>Rps15a-ps</b> | 1.632469 | 0.014773 | 0.014773 |
| <b>Gm45534</b>   | 22.60494 | 0.014945 | 0.014945 |
| <b>Ubox5</b>     | 2.660191 | 0.014898 | 0.014898 |
| <b>Rhod</b>      | 1.159431 | 0.01511  | 0.01511  |
| <b>Nr2e1</b>     | 3.657185 | 0.015227 | 0.015227 |
| <b>Ssu72</b>     | 0.412165 | 0.015451 | 0.015451 |
| <b>Fabp5</b>     | 1.411966 | 0.015439 | 0.015439 |
| <b>4933412E1</b> | 22.65952 | 0.015451 | 0.015451 |
| <b>Ptpru</b>     | 1.011785 | 0.015407 | 0.015407 |

|                 |          |          |          |
|-----------------|----------|----------|----------|
| <b>Sgce</b>     | 0.955336 | 0.015492 | 0.015492 |
| <b>Magi3</b>    | 0.635658 | 0.015553 | 0.015553 |
| <b>Cdkn2c</b>   | 1.032513 | 0.015511 | 0.015511 |
| <b>Impa2</b>    | 1.21196  | 0.015553 | 0.015553 |
| <b>Hecw2</b>    | 1.529077 | 0.015555 | 0.015555 |
| <b>Dnajc1</b>   | 0.546178 | 0.015765 | 0.015765 |
| <b>Dock7</b>    | 1.57548  | 0.015555 | 0.015555 |
| <b>A530041M</b> | 2.211164 | 0.015553 | 0.015553 |
| <b>Tpst2</b>    | 0.596644 | 0.015765 | 0.015765 |
| <b>Wdr76</b>    | 1.3109   | 0.015596 | 0.015596 |
| <b>Sort1</b>    | 0.702995 | 0.015765 | 0.015765 |
| <b>B4galt1</b>  | 0.774522 | 0.015787 | 0.015787 |
| <b>Adora1</b>   | 3.727572 | 0.015721 | 0.015721 |
| <b>Dmac2</b>    | 1.087634 | 0.01584  | 0.01584  |
| <b>Ndfip1</b>   | 0.358044 | 0.016095 | 0.016095 |
| <b>Zcchc24</b>  | 0.765196 | 0.01603  | 0.01603  |
| <b>Eif4e</b>    | 0.637645 | 0.01601  | 0.01601  |
| <b>Gm45222</b>  | 1.366085 | 0.015901 | 0.015901 |
| <b>Slc6a1</b>   | 1.871366 | 0.015905 | 0.015905 |
| <b>Mad2l2</b>   | 0.965205 | 0.016175 | 0.016175 |
| <b>Agpat4</b>   | 0.728756 | 0.016198 | 0.016198 |
| <b>Lrp10</b>    | 0.514416 | 0.016398 | 0.016398 |
| <b>Knstrn</b>   | 22.27931 | 0.01632  | 0.01632  |
| <b>Gm37677</b>  | 1.99231  | 0.016175 | 0.016175 |
| <b>Preb</b>     | 0.712619 | 0.016449 | 0.016449 |
| <b>Prkcb</b>    | 1.306387 | 0.016381 | 0.016381 |
| <b>Zbtb7a</b>   | 0.391968 | 0.016554 | 0.016554 |
| <b>St7</b>      | 1.710975 | 0.016432 | 0.016432 |
| <b>Pf4</b>      | 1.753877 | 0.016376 | 0.016376 |
| <b>Gstm5</b>    | 0.702796 | 0.016562 | 0.016562 |
| <b>Sergef</b>   | 1.928735 | 0.016381 | 0.016381 |
| <b>Jam3</b>     | 1.164173 | 0.016482 | 0.016482 |
| <b>Pianp</b>    | 0.927257 | 0.016562 | 0.016562 |
| <b>Odc1</b>     | 0.872384 | 0.016563 | 0.016563 |
| <b>Pde6c</b>    | 2.279819 | 0.016481 | 0.016481 |
| <b>Pgf</b>      | 1.580825 | 0.016554 | 0.016554 |
| <b>Rps6-ps4</b> | 1.077769 | 0.016562 | 0.016562 |
| <b>Slbp</b>     | 0.760682 | 0.016652 | 0.016652 |
| <b>Wbp1l</b>    | 0.633538 | 0.016728 | 0.016728 |
| <b>Fgfr1</b>    | 0.856773 | 0.016695 | 0.016695 |
| <b>Acp5</b>     | 2.110473 | 0.016805 | 0.016805 |
| <b>Jpt1</b>     | 0.86617  | 0.017013 | 0.017013 |
| <b>Rasl12</b>   | 1.442598 | 0.017084 | 0.017084 |
| <b>Ddx3x</b>    | 0.351804 | 0.017315 | 0.017315 |
| <b>Tubb6</b>    | 1.234606 | 0.017169 | 0.017169 |
| <b>Pfn1</b>     | 0.28843  | 0.017393 | 0.017393 |
| <b>Add3</b>     | 0.447647 | 0.017443 | 0.017443 |

|          |          |          |          |
|----------|----------|----------|----------|
| Gm49405  | 3.307186 | 0.017274 | 0.017274 |
| Vdac1    | 0.436149 | 0.017486 | 0.017486 |
| Tubb4a   | 3.224378 | 0.0174   | 0.0174   |
| Lin7a    | 1.510948 | 0.017443 | 0.017443 |
| Cnp      | 1.280078 | 0.017544 | 0.017544 |
| Gm48682  | 3.888443 | 0.017534 | 0.017534 |
| 2700046A | 1.641165 | 0.017452 | 0.017452 |
| Nptn     | 0.458191 | 0.017729 | 0.017729 |
| Cybb     | 23.51343 | 0.017684 | 0.017684 |
| Dmwd     | 0.71264  | 0.017732 | 0.017732 |
| Trim46   | 22.77209 | 0.017732 | 0.017732 |
| Plagl2   | 1.032374 | 0.017876 | 0.017876 |
| Gm21955  | 2.713068 | 0.017794 | 0.017794 |
| Zfp827   | 2.528724 | 0.01783  | 0.01783  |
| Naglu    | 1.268788 | 0.017879 | 0.017879 |
| Gm4876   | 23.21331 | 0.018116 | 0.018116 |
| Gstm1    | 0.503096 | 0.018275 | 0.018275 |
| Arhgef3  | 0.548817 | 0.018275 | 0.018275 |
| Snai1    | 2.466614 | 0.01827  | 0.01827  |
| Ntpcr    | 1.310092 | 0.01835  | 0.01835  |
| Fabp4    | 1.367878 | 0.018488 | 0.018488 |
| Atraid   | 0.44068  | 0.018583 | 0.018583 |
| Ajap1    | 1.659624 | 0.018369 | 0.018369 |
| Etfa     | 0.644139 | 0.018537 | 0.018537 |
| Acvr1b   | 2.054392 | 0.018417 | 0.018417 |
| Ncoa7    | 0.623688 | 0.01863  | 0.01863  |
| 4931406C | 0.848801 | 0.018594 | 0.018594 |
| Cd34     | 0.260973 | 0.018879 | 0.018879 |
| Zfp362   | 0.873067 | 0.018801 | 0.018801 |
| Nf1      | 0.722273 | 0.018879 | 0.018879 |
| Pdzrn3   | 3.089693 | 0.018704 | 0.018704 |
| Tipin    | 0.745345 | 0.018944 | 0.018944 |
| Osmr     | 0.461461 | 0.019103 | 0.019103 |
| Tedc2    | 1.936943 | 0.018862 | 0.018862 |
| Bach2    | 1.251188 | 0.019029 | 0.019029 |
| Prdm9    | 1.970194 | 0.019021 | 0.019021 |
| Snrpg    | 0.352757 | 0.019467 | 0.019467 |
| 1810055G | 2.20207  | 0.019167 | 0.019167 |
| Fastkd1  | 1.495576 | 0.019403 | 0.019403 |
| Fkbp2    | 0.506533 | 0.0196   | 0.0196   |
| Mettl8   | 2.414839 | 0.01936  | 0.01936  |
| Hey2     | 1.275512 | 0.01955  | 0.01955  |
| Gm45413  | 2.103963 | 0.019403 | 0.019403 |
| Rps27rt  | 0.788245 | 0.019653 | 0.019653 |
| Npdc1    | 0.533356 | 0.019677 | 0.019677 |
| Eml2     | 0.786317 | 0.019653 | 0.019653 |
| Gm10644  | 22.70068 | 0.019731 | 0.019731 |

|                  |          |          |          |
|------------------|----------|----------|----------|
| <b>Ccdc122</b>   | 2.598006 | 0.0196   | 0.0196   |
| <b>Gm42595</b>   | 2.567096 | 0.019848 | 0.019848 |
| <b>Gm33989</b>   | 0.792581 | 0.020131 | 0.020131 |
| <b>Rbbp6</b>     | 0.389969 | 0.020315 | 0.020315 |
| <b>Trim59</b>    | 21.89151 | 0.020273 | 0.020273 |
| <b>Smpd1</b>     | 0.705286 | 0.020395 | 0.020395 |
| <b>Mxi1</b>      | 0.573071 | 0.020606 | 0.020606 |
| <b>Prkar1b</b>   | 1.765356 | 0.020484 | 0.020484 |
| <b>Cped1</b>     | 1.216995 | 0.02062  | 0.02062  |
| <b>Pals1</b>     | 0.710824 | 0.021054 | 0.021054 |
| <b>Rai2</b>      | 3.061573 | 0.020923 | 0.020923 |
| <b>Hdlbp</b>     | 0.430516 | 0.021391 | 0.021391 |
| <b>Rnf4</b>      | 0.608826 | 0.021368 | 0.021368 |
| <b>Rock2</b>     | 0.330788 | 0.021449 | 0.021449 |
| <b>Gal3st3</b>   | 3.593598 | 0.02126  | 0.02126  |
| <b>Nbdy</b>      | 0.521687 | 0.021457 | 0.021457 |
| <b>Usp3</b>      | 0.689947 | 0.021457 | 0.021457 |
| <b>Rlbp1</b>     | 0.609967 | 0.021485 | 0.021485 |
| <b>Pcna</b>      | 0.581343 | 0.021618 | 0.021618 |
| <b>Svil</b>      | 0.508801 | 0.021642 | 0.021642 |
| <b>Pole2</b>     | 2.223719 | 0.021485 | 0.021485 |
| <b>Gpank1</b>    | 1.004391 | 0.021698 | 0.021698 |
| <b>Gnao1</b>     | 1.299102 | 0.021642 | 0.021642 |
| <b>Cotl1</b>     | 1.041211 | 0.021905 | 0.021905 |
| <b>A730020E</b>  | 23.01808 | 0.021879 | 0.021879 |
| <b>Fbxo2</b>     | 1.084708 | 0.021812 | 0.021812 |
| <b>Efemp2</b>    | 0.749039 | 0.021922 | 0.021922 |
| <b>Shisa9</b>    | 22.56367 | 0.021895 | 0.021895 |
| <b>Mxra7</b>     | 0.419216 | 0.021982 | 0.021982 |
| <b>6430573P</b>  | 2.567393 | 0.021893 | 0.021893 |
| <b>Rai14</b>     | 0.420742 | 0.022238 | 0.022238 |
| <b>MLlt11</b>    | 1.974174 | 0.021938 | 0.021938 |
| <b>Nudt19</b>    | 1.110711 | 0.022258 | 0.022258 |
| <b>Ndufb11</b>   | 0.327225 | 0.022625 | 0.022625 |
| <b>Tnfsf10</b>   | 0.556155 | 0.022568 | 0.022568 |
| <b>Slc25a22</b>  | 1.148673 | 0.022333 | 0.022333 |
| <b>Diras2</b>    | 1.765288 | 0.02228  | 0.02228  |
| <b>Tbc1d2b</b>   | 1.402349 | 0.022606 | 0.022606 |
| <b>Asrgl1</b>    | 0.752959 | 0.022658 | 0.022658 |
| <b>Vps28</b>     | 0.403062 | 0.023072 | 0.023072 |
| <b>Serpinb6a</b> | 0.366042 | 0.023144 | 0.023144 |
| <b>Colec12</b>   | 1.00852  | 0.023151 | 0.023151 |
| <b>Reep1</b>     | 0.994858 | 0.023294 | 0.023294 |
| <b>Mnd1</b>      | 1.307462 | 0.023287 | 0.023287 |
| <b>Ilf2</b>      | 0.573306 | 0.023478 | 0.023478 |
| <b>Pgm2</b>      | 0.822129 | 0.023403 | 0.023403 |
| <b>Rgs12</b>     | 0.50217  | 0.023541 | 0.023541 |

|                  |          |          |          |
|------------------|----------|----------|----------|
| <b>Aldh1a1</b>   | 1.58155  | 0.023337 | 0.023337 |
| <b>Scarf2</b>    | 1.40426  | 0.023641 | 0.023641 |
| <b>Kctd14</b>    | 21.40152 | 0.023784 | 0.023784 |
| <b>Ndrgr2</b>    | 0.603199 | 0.023989 | 0.023989 |
| <b>Dcp1a</b>     | 1.205345 | 0.023864 | 0.023864 |
| <b>Ddx56</b>     | 1.119398 | 0.02403  | 0.02403  |
| <b>Glrbb</b>     | 22.77176 | 0.024154 | 0.024154 |
| <b>Mtdh</b>      | 0.35486  | 0.024333 | 0.024333 |
| <b>Sra1</b>      | 0.571944 | 0.024405 | 0.024405 |
| <b>Spidr</b>     | 1.06167  | 0.024379 | 0.024379 |
| <b>Eif4b</b>     | 0.410854 | 0.024609 | 0.024609 |
| <b>Dynlt3</b>    | 0.445117 | 0.024737 | 0.024737 |
| <b>Tcf7l1</b>    | 0.812799 | 0.024713 | 0.024713 |
| <b>Tmem245</b>   | 0.436625 | 0.02479  | 0.02479  |
| <b>Ddost</b>     | 0.543798 | 0.024857 | 0.024857 |
| <b>Ninj1</b>     | 0.559255 | 0.024806 | 0.024806 |
| <b>1110065P2</b> | 0.717543 | 0.02479  | 0.02479  |
| <b>Gm37443</b>   | 22.53884 | 0.024806 | 0.024806 |
| <b>Unc93b1</b>   | 0.898004 | 0.024839 | 0.024839 |
| <b>Adap2os</b>   | 1.977659 | 0.024855 | 0.024855 |
| <b>Tram1</b>     | 0.475474 | 0.024985 | 0.024985 |
| <b>Kcnk6</b>     | 1.838295 | 0.02479  | 0.02479  |
| <b>Kank2</b>     | 0.569581 | 0.025242 | 0.025242 |
| <b>Tspan33</b>   | 22.21675 | 0.025265 | 0.025265 |
| <b>Cdyl2</b>     | 1.53621  | 0.025242 | 0.025242 |
| <b>Zfp36l1</b>   | 0.261685 | 0.025603 | 0.025603 |
| <b>Gm42822</b>   | 22.29039 | 0.025432 | 0.025432 |
| <b>Airn</b>      | 1.218102 | 0.025548 | 0.025548 |
| <b>Car11</b>     | 22.66133 | 0.025561 | 0.025561 |
| <b>Srrm3</b>     | 1.642202 | 0.02538  | 0.02538  |
| <b>Asap3</b>     | 1.421012 | 0.025432 | 0.025432 |
| <b>Syng2</b>     | 0.554211 | 0.025701 | 0.025701 |
| <b>Lims2</b>     | 0.38795  | 0.025775 | 0.025775 |
| <b>Oat</b>       | 0.625257 | 0.025677 | 0.025677 |
| <b>Dnajb1</b>    | 0.516489 | 0.025851 | 0.025851 |
| <b>Samsn1</b>    | 1.793817 | 0.025643 | 0.025643 |
| <b>Mafk</b>      | 0.654465 | 0.026045 | 0.026045 |
| <b>Tspyl5</b>    | 3.732391 | 0.026051 | 0.026051 |
| <b>Galnt17</b>   | 1.937869 | 0.025933 | 0.025933 |
| <b>Gm43581</b>   | 1.167324 | 0.026297 | 0.026297 |
| <b>Gm47963</b>   | 22.37396 | 0.026595 | 0.026595 |
| <b>Etv1</b>      | 1.142034 | 0.026741 | 0.026741 |
| <b>Tada2b</b>    | 0.900316 | 0.026816 | 0.026816 |
| <b>Fbxw4</b>     | 1.063234 | 0.026816 | 0.026816 |
| <b>4930590J0</b> | 22.41969 | 0.02685  | 0.02685  |
| <b>Suclg2</b>    | 0.762278 | 0.026941 | 0.026941 |
| <b>Syn2</b>      | 1.940431 | 0.026985 | 0.026985 |

|                  |          |          |          |
|------------------|----------|----------|----------|
| <b>1700019D</b>  | 22.59373 | 0.027034 | 0.027034 |
| <b>Dact3</b>     | 1.819666 | 0.027558 | 0.027558 |
| <b>Dad1</b>      | 0.322679 | 0.02783  | 0.02783  |
| <b>Ptpmt1</b>    | 0.616581 | 0.027718 | 0.027718 |
| <b>Tspan3</b>    | 0.450807 | 0.027964 | 0.027964 |
| <b>Antxr2</b>    | 2.440983 | 0.027642 | 0.027642 |
| <b>Six6</b>      | 1.579665 | 0.027642 | 0.027642 |
| <b>Parp8</b>     | 1.425762 | 0.028242 | 0.028242 |
| <b>Mecp2</b>     | 0.493313 | 0.028749 | 0.028749 |
| <b>Iqsec3</b>    | 1.879174 | 0.028363 | 0.028363 |
| <b>Tbc1d24</b>   | 0.989478 | 0.028778 | 0.028778 |
| <b>Pax6os1</b>   | 21.99468 | 0.028961 | 0.028961 |
| <b>Rreb1</b>     | 0.649225 | 0.029195 | 0.029195 |
| <b>Slc25a23</b>  | 0.806529 | 0.029194 | 0.029194 |
| <b>Anxa1</b>     | 0.637584 | 0.029399 | 0.029399 |
| <b>Hemk1</b>     | 2.302618 | 0.029159 | 0.029159 |
| <b>Abi3</b>      | 1.124137 | 0.029426 | 0.029426 |
| <b>Itgb5</b>     | 0.807982 | 0.029657 | 0.029657 |
| <b>Rab37</b>     | 22.32101 | 0.029644 | 0.029644 |
| <b>Lpp</b>       | 0.436507 | 0.02982  | 0.02982  |
| <b>Emid1</b>     | 21.96843 | 0.029683 | 0.029683 |
| <b>Gchfr</b>     | 2.141539 | 0.029615 | 0.029615 |
| <b>Cnrip1</b>    | 1.195333 | 0.029683 | 0.029683 |
| <b>Mfsd13a</b>   | 1.680338 | 0.029657 | 0.029657 |
| <b>Gnpda1</b>    | 1.801433 | 0.029898 | 0.029898 |
| <b>Plekhg3</b>   | 1.170034 | 0.030177 | 0.030177 |
| <b>Mark3</b>     | 0.412582 | 0.030318 | 0.030318 |
| <b>Smim4</b>     | 0.844494 | 0.030321 | 0.030321 |
| <b>Pkig</b>      | 0.329112 | 0.030967 | 0.030967 |
| <b>Klhl5</b>     | 0.422791 | 0.031191 | 0.031191 |
| <b>Cmpk1</b>     | 0.466155 | 0.031139 | 0.031139 |
| <b>Lix1l</b>     | 0.659317 | 0.031139 | 0.031139 |
| <b>Gm37101</b>   | 1.634767 | 0.030943 | 0.030943 |
| <b>Tra2b</b>     | 0.376412 | 0.031391 | 0.031391 |
| <b>Gm36266</b>   | 22.43411 | 0.031195 | 0.031195 |
| <b>Snca</b>      | 21.92531 | 0.031216 | 0.031216 |
| <b>Ckap4</b>     | 0.56138  | 0.031415 | 0.031415 |
| <b>Mrpl53</b>    | 21.93471 | 0.031675 | 0.031675 |
| <b>Tbx15</b>     | 2.531073 | 0.031675 | 0.031675 |
| <b>Mindy2</b>    | 0.372173 | 0.032137 | 0.032137 |
| <b>1110004F1</b> | 0.423039 | 0.032176 | 0.032176 |
| <b>A4galt</b>    | 0.509852 | 0.032376 | 0.032376 |
| <b>Tubb5</b>     | 0.298128 | 0.03248  | 0.03248  |
| <b>Ccdc71</b>    | 0.870858 | 0.032376 | 0.032376 |
| <b>Pbx2</b>      | 0.714752 | 0.032503 | 0.032503 |
| <b>Acbd4</b>     | 0.905066 | 0.032395 | 0.032395 |
| <b>4930523C</b>  | 0.455218 | 0.032639 | 0.032639 |

|                  |          |          |          |
|------------------|----------|----------|----------|
| <b>Zfp184</b>    | 2.680169 | 0.032395 | 0.032395 |
| <b>Kdr</b>       | 0.327157 | 0.032841 | 0.032841 |
| <b>Nbeal2</b>    | 1.028935 | 0.032577 | 0.032577 |
| <b>Mpp7</b>      | 0.748878 | 0.032639 | 0.032639 |
| <b>Prss56</b>    | 22.41406 | 0.032843 | 0.032843 |
| <b>Csrp2</b>     | 0.349769 | 0.033027 | 0.033027 |
| <b>Gm43062</b>   | 21.93069 | 0.032963 | 0.032963 |
| <b>Epb41l4ao</b> | 0.76462  | 0.033166 | 0.033166 |
| <b>Arhgef6</b>   | 1.329827 | 0.033083 | 0.033083 |
| <b>Ydjc</b>      | 22.15355 | 0.033152 | 0.033152 |
| <b>Xpa</b>       | 0.783468 | 0.033392 | 0.033392 |
| <b>Adprs</b>     | 0.87583  | 0.033258 | 0.033258 |
| <b>Tor1aip2</b>  | 0.592625 | 0.033593 | 0.033593 |
| <b>Sebox</b>     | 2.733669 | 0.033391 | 0.033391 |
| <b>Gng12</b>     | 0.49329  | 0.033709 | 0.033709 |
| <b>Chchd5</b>    | 0.905599 | 0.033593 | 0.033593 |
| <b>Stac2</b>     | 22.76568 | 0.033678 | 0.033678 |
| <b>Spats2</b>    | 0.832562 | 0.033768 | 0.033768 |
| <b>Cd82</b>      | 0.949432 | 0.033678 | 0.033678 |
| <b>Entpd2</b>    | 21.93497 | 0.034064 | 0.034064 |
| <b>Sigmar1</b>   | 0.973867 | 0.03401  | 0.03401  |
| <b>Mtmr7</b>     | 1.878947 | 0.033869 | 0.033869 |
| <b>1110038B1</b> | 1.010942 | 0.034211 | 0.034211 |
| <b>Birc2</b>     | 0.628545 | 0.034251 | 0.034251 |
| <b>Tep1</b>      | 1.43198  | 0.03401  | 0.03401  |
| <b>Apoc1</b>     | 22.46576 | 0.034482 | 0.034482 |
| <b>Otx2</b>      | 0.896371 | 0.034536 | 0.034536 |
| <b>Tmem120a</b>  | 1.223795 | 0.034536 | 0.034536 |
| <b>Gm12059</b>   | 22.95503 | 0.034746 | 0.034746 |
| <b>Gm20498</b>   | 22.38095 | 0.034772 | 0.034772 |
| <b>Fam110b</b>   | 2.21767  | 0.034589 | 0.034589 |
| <b>Gpld1</b>     | 3.051805 | 0.034658 | 0.034658 |
| <b>Zbtb41</b>    | 0.788083 | 0.034855 | 0.034855 |
| <b>Pim1</b>      | 0.605069 | 0.035081 | 0.035081 |
| <b>Rasd2</b>     | 2.211294 | 0.035061 | 0.035061 |
| <b>Eral1</b>     | 1.643028 | 0.03501  | 0.03501  |
| <b>Tyrobp</b>    | 2.221849 | 0.034998 | 0.034998 |
| <b>Tsc22d2</b>   | 0.50991  | 0.035406 | 0.035406 |
| <b>H2ac20</b>    | 3.276816 | 0.035133 | 0.035133 |
| <b>Ifitm3</b>    | 0.219302 | 0.03557  | 0.03557  |
| <b>Tln1</b>      | 0.357422 | 0.035552 | 0.035552 |
| <b>Tmem254a</b>  | 0.938488 | 0.035423 | 0.035423 |
| <b>Ralb</b>      | 0.446658 | 0.035552 | 0.035552 |
| <b>Prr14</b>     | 0.63377  | 0.035552 | 0.035552 |
| <b>Uri1</b>      | 0.558893 | 0.035652 | 0.035652 |
| <b>Yes1</b>      | 0.545214 | 0.035813 | 0.035813 |
| <b>Gm10503</b>   | 1.047837 | 0.035652 | 0.035652 |



|                 |          |          |          |
|-----------------|----------|----------|----------|
| <b>Pigx</b>     | 0.779635 | 0.035944 | 0.035944 |
| <b>Gyg</b>      | 0.676944 | 0.036097 | 0.036097 |
| <b>Atf4</b>     | 0.363768 | 0.036325 | 0.036325 |
| <b>Nenf</b>     | 0.342365 | 0.036395 | 0.036395 |
| <b>Mrtfb</b>    | 0.318936 | 0.036412 | 0.036412 |
| <b>Gm34455</b>  | 1.424127 | 0.036153 | 0.036153 |
| <b>Znhit3</b>   | 0.90814  | 0.036311 | 0.036311 |
| <b>Zfp583</b>   | 3.554309 | 0.036395 | 0.036395 |
| <b>Spint2</b>   | 1.230151 | 0.03652  | 0.03652  |
| <b>Plekha7</b>  | 2.003763 | 0.03636  | 0.03636  |
| <b>Sptlc2</b>   | 0.455059 | 0.036679 | 0.036679 |
| <b>Gm50094</b>  | 2.330351 | 0.036395 | 0.036395 |
| <b>C1qtnf12</b> | 1.220204 | 0.036659 | 0.036659 |
| <b>Ncf4</b>     | 22.43873 | 0.036679 | 0.036679 |
| <b>Tada3</b>    | 0.836702 | 0.036717 | 0.036717 |
| <b>Cisd3</b>    | 0.997109 | 0.036771 | 0.036771 |
| <b>Mbd2</b>     | 0.393845 | 0.037093 | 0.037093 |
| <b>Plpp3</b>    | 0.617462 | 0.037018 | 0.037018 |
| <b>Gm22146</b>  | 2.656573 | 0.036919 | 0.036919 |
| <b>Nup98</b>    | 0.610612 | 0.037218 | 0.037218 |
| <b>Ptov1</b>    | 0.540377 | 0.037417 | 0.037417 |
| <b>Dmd</b>      | 0.536398 | 0.037417 | 0.037417 |
| <b>Hsd12</b>    | 0.680234 | 0.037417 | 0.037417 |
| <b>Sord</b>     | 1.553169 | 0.037219 | 0.037219 |
| <b>Rcn2</b>     | 0.442234 | 0.037559 | 0.037559 |
| <b>Arhgap18</b> | 0.702219 | 0.037417 | 0.037417 |
| <b>Auts2</b>    | 0.482862 | 0.037787 | 0.037787 |
| <b>Pcbp2</b>    | 0.24292  | 0.037904 | 0.037904 |
| <b>Mrps23</b>   | 0.821529 | 0.037667 | 0.037667 |
| <b>Lrrc42</b>   | 0.972412 | 0.037752 | 0.037752 |
| <b>Ttll3</b>    | 1.85353  | 0.037578 | 0.037578 |
| <b>Car8</b>     | 22.07366 | 0.037904 | 0.037904 |
| <b>Rasgef1a</b> | 1.301069 | 0.037904 | 0.037904 |
| <b>Cyb561</b>   | 1.073507 | 0.037959 | 0.037959 |
| <b>Micos10</b>  | 0.325526 | 0.038095 | 0.038095 |
| <b>Gm10209</b>  | 21.72634 | 0.037959 | 0.037959 |
| <b>Lncpint</b>  | 0.786056 | 0.037954 | 0.037954 |
| <b>Ypel2</b>    | 0.605811 | 0.038028 | 0.038028 |
| <b>Mcts2</b>    | 1.140219 | 0.037904 | 0.037904 |
| <b>Trpc4</b>    | 1.827138 | 0.037904 | 0.037904 |
| <b>Zfp54</b>    | 22.49055 | 0.038083 | 0.038083 |
| <b>Kcnab1</b>   | 22.55137 | 0.038095 | 0.038095 |
| <b>Diaph2</b>   | 0.709277 | 0.038325 | 0.038325 |
| <b>Gm26930</b>  | 2.003668 | 0.038028 | 0.038028 |
| <b>Ranbp9</b>   | 0.529388 | 0.038509 | 0.038509 |
| <b>Ccnl1</b>    | 0.376014 | 0.038798 | 0.038798 |
| <b>Pde7b</b>    | 1.098515 | 0.038622 | 0.038622 |

|                  |          |          |          |
|------------------|----------|----------|----------|
| <b>Serp1</b>     | 0.534792 | 0.038798 | 0.038798 |
| <b>Esam</b>      | 0.25926  | 0.039029 | 0.039029 |
| <b>Mrtfa</b>     | 1.5135   | 0.038798 | 0.038798 |
| <b>Dcaf4</b>     | 1.71491  | 0.038798 | 0.038798 |
| <b>Mrpl23</b>    | 1.317444 | 0.038947 | 0.038947 |
| <b>N4bp2</b>     | 1.195552 | 0.038886 | 0.038886 |
| <b>Rps23-ps1</b> | 0.738956 | 0.039128 | 0.039128 |
| <b>Tnfrsf11a</b> | 0.90415  | 0.039128 | 0.039128 |
| <b>Nkd2</b>      | 1.381696 | 0.039167 | 0.039167 |
| <b>Snx13</b>     | 0.58802  | 0.039248 | 0.039248 |
| <b>Endog</b>     | 0.846111 | 0.039524 | 0.039524 |
| <b>Cnot6l</b>    | 0.348529 | 0.039774 | 0.039774 |
| <b>Mcl1</b>      | 0.273505 | 0.039818 | 0.039818 |
| <b>Wapl</b>      | 0.406181 | 0.039818 | 0.039818 |
| <b>Celsr2</b>    | 2.191473 | 0.039435 | 0.039435 |
| <b>Slc31a2</b>   | 0.514511 | 0.039796 | 0.039796 |
| <b>Stxbp2</b>    | 3.062134 | 0.03964  | 0.03964  |
| <b>Tmem165</b>   | 0.497736 | 0.039818 | 0.039818 |
| <b>Nxt1</b>      | 0.700818 | 0.039818 | 0.039818 |
| <b>Cnpy3</b>     | 0.901086 | 0.039818 | 0.039818 |
| <b>Gm49797</b>   | 1.149971 | 0.039818 | 0.039818 |
| <b>Nnat</b>      | 2.194458 | 0.039818 | 0.039818 |
| <b>Col4a2</b>    | 0.285336 | 0.04038  | 0.04038  |
| <b>Arrdc2</b>    | 1.32357  | 0.040161 | 0.040161 |
| <b>Pde4a</b>     | 1.023506 | 0.04038  | 0.04038  |
| <b>Spa17</b>     | 1.643569 | 0.040297 | 0.040297 |
| <b>Ttc39b</b>    | 0.759057 | 0.040391 | 0.040391 |
| <b>Srrm2</b>     | 0.254684 | 0.040555 | 0.040555 |
| <b>Zfp746</b>    | 0.897236 | 0.04038  | 0.04038  |
| <b>Nostrin</b>   | 0.344923 | 0.040536 | 0.040536 |
| <b>Dnpep</b>     | 0.539968 | 0.040527 | 0.040527 |
| <b>Dph6</b>      | 0.833694 | 0.040395 | 0.040395 |
| <b>Enc1</b>      | 0.462616 | 0.040479 | 0.040479 |
| <b>Lancl3</b>    | 1.293571 | 0.040397 | 0.040397 |
| <b>Cdt1</b>      | 3.030838 | 0.040391 | 0.040391 |
| <b>Ppp1r2</b>    | 0.305563 | 0.040883 | 0.040883 |
| <b>Klf3</b>      | 0.325654 | 0.040883 | 0.040883 |
| <b>P3h4</b>      | 0.971585 | 0.040773 | 0.040773 |
| <b>Phka2</b>     | 1.366398 | 0.040605 | 0.040605 |
| <b>Rrp1</b>      | 0.396484 | 0.041021 | 0.041021 |
| <b>Cltc</b>      | 0.325343 | 0.041077 | 0.041077 |
| <b>Prxl2b</b>    | 0.903981 | 0.04089  | 0.04089  |
| <b>Suz12</b>     | 0.446933 | 0.041274 | 0.041274 |
| <b>4930426I2</b> | 2.46323  | 0.041077 | 0.041077 |
| <b>1810010H</b>  | 2.202377 | 0.041125 | 0.041125 |
| <b>Mir703</b>    | 0.859409 | 0.041407 | 0.041407 |
| <b>Arf4</b>      | 0.365274 | 0.041719 | 0.041719 |

|                  |          |          |          |
|------------------|----------|----------|----------|
| <b>Sugct</b>     | 3.075081 | 0.041399 | 0.041399 |
| <b>Ggnbp1</b>    | 21.39774 | 0.0416   | 0.0416   |
| <b>Nlgn2</b>     | 1.101993 | 0.041722 | 0.041722 |
| <b>Rab9</b>      | 0.563864 | 0.042109 | 0.042109 |
| <b>Dagla</b>     | 2.973597 | 0.041909 | 0.041909 |
| <b>Slc25a4</b>   | 0.277341 | 0.042526 | 0.042526 |
| <b>Cand2</b>     | 2.737036 | 0.042749 | 0.042749 |
| <b>Clta</b>      | 0.304355 | 0.04371  | 0.04371  |
| <b>Dcaf5</b>     | 0.698511 | 0.043552 | 0.043552 |
| <b>Pik3ip1</b>   | 0.485841 | 0.043791 | 0.043791 |
| <b>Ttc32</b>     | 0.919686 | 0.043667 | 0.043667 |
| <b>Map2k3os</b>  | 22.55924 | 0.04371  | 0.04371  |
| <b>Hnrnpa1</b>   | 0.368344 | 0.043962 | 0.043962 |
| <b>Gabpb1</b>    | 0.658783 | 0.043962 | 0.043962 |
| <b>Otulinl</b>   | 21.47459 | 0.043962 | 0.043962 |
| <b>Renbp</b>     | 1.499094 | 0.043991 | 0.043991 |
| <b>Galm</b>      | 2.87987  | 0.043962 | 0.043962 |
| <b>Tmem79</b>    | 21.96233 | 0.044296 | 0.044296 |
| <b>Ddah1</b>     | 0.55529  | 0.044545 | 0.044545 |
| <b>Fbl</b>       | 0.805218 | 0.044488 | 0.044488 |
| <b>Snx21</b>     | 0.637684 | 0.044747 | 0.044747 |
| <b>Trib2</b>     | 0.534737 | 0.044713 | 0.044713 |
| <b>Gm48369</b>   | 21.70312 | 0.044747 | 0.044747 |
| <b>Gm43187</b>   | 3.168614 | 0.044844 | 0.044844 |
| <b>Gm43766</b>   | 22.17104 | 0.045195 | 0.045195 |
| <b>Figl2</b>     | 1.130045 | 0.045195 | 0.045195 |
| <b>Supt3</b>     | 1.418385 | 0.045148 | 0.045148 |
| <b>Fabp7</b>     | 22.0017  | 0.045404 | 0.045404 |
| <b>Nck1</b>      | 0.375097 | 0.045577 | 0.045577 |
| <b>Jpx</b>       | 2.17548  | 0.045195 | 0.045195 |
| <b>Jph1</b>      | 21.7546  | 0.045463 | 0.045463 |
| <b>Kcnq4</b>     | 2.740059 | 0.045283 | 0.045283 |
| <b>Cyp20a1</b>   | 0.835071 | 0.045666 | 0.045666 |
| <b>Ptma-ps2</b>  | 3.446732 | 0.045708 | 0.045708 |
| <b>Picalm</b>    | 0.307175 | 0.046458 | 0.046458 |
| <b>Agbl5</b>     | 1.490556 | 0.04623  | 0.04623  |
| <b>Capzb</b>     | 0.321605 | 0.046926 | 0.046926 |
| <b>Thnsl2</b>    | 1.400675 | 0.046888 | 0.046888 |
| <b>Fzd10os</b>   | 21.9415  | 0.047215 | 0.047215 |
| <b>3110082I1</b> | 0.977322 | 0.04708  | 0.04708  |
| <b>Calm2</b>     | 0.294291 | 0.047857 | 0.047857 |
| <b>Metrn</b>     | 1.023853 | 0.047687 | 0.047687 |
| <b>Garre1</b>    | 0.265278 | 0.048027 | 0.048027 |
| <b>Inca1</b>     | 22.94913 | 0.047789 | 0.047789 |
| <b>Per2</b>      | 1.277546 | 0.047937 | 0.047937 |
| <b>Rab34</b>     | 0.978286 | 0.048124 | 0.048124 |
| <b>Steap2</b>    | 1.236276 | 0.047937 | 0.047937 |

|                  |          |          |          |
|------------------|----------|----------|----------|
| <b>H13</b>       | 0.491679 | 0.048398 | 0.048398 |
| <b>Mboat2</b>    | 1.601811 | 0.048145 | 0.048145 |
| <b>Pax6</b>      | 1.112747 | 0.048473 | 0.048473 |
| <b>Iqcb1</b>     | 0.93837  | 0.04863  | 0.04863  |
| <b>Poldip3</b>   | 0.56545  | 0.048874 | 0.048874 |
| <b>Gpc6</b>      | 1.381012 | 0.049058 | 0.049058 |
| <b>Syt9</b>      | 21.30608 | 0.049009 | 0.049009 |
| <b>Rwdd3</b>     | 1.787391 | 0.048802 | 0.048802 |
| <b>Heph</b>      | 1.713126 | 0.049058 | 0.049058 |
| <b>Capn5</b>     | 2.076246 | 0.049041 | 0.049041 |
| <b>Lepr</b>      | 1.737257 | 0.049209 | 0.049209 |
| <b>Sgcb</b>      | 1.033334 | 0.049278 | 0.049278 |
| <b>Gm15420</b>   | 22.50288 | 0.049518 | 0.049518 |
| <b>Eif1a</b>     | 0.489371 | 0.049729 | 0.049729 |
| <b>Gna13</b>     | 0.445492 | 0.049994 | 0.049994 |
| <b>Enoph1</b>    | 1.078941 | 0.049729 | 0.049729 |
| <b>Smo</b>       | 0.879853 | 0.049863 | 0.049863 |
| <b>Larp6</b>     | 2.507364 | 0.04968  | 0.04968  |
| <b>Zfp282</b>    | 1.073584 | 0.049965 | 0.049965 |
| <b>A030005L1</b> | 21.64273 | 0.049994 | 0.049994 |
| <b>Afap1l2</b>   | -0.46573 | 0.04996  | 0.04996  |
| <b>5031425E2</b> | -0.59061 | 0.049821 | 0.049821 |
| <b>Zfp704</b>    | -0.51854 | 0.049009 | 0.049009 |
| <b>H3c15</b>     | -2.4536  | 0.049209 | 0.049209 |
| <b>Grb14</b>     | -0.58849 | 0.048874 | 0.048874 |
| <b>Ppia</b>      | -0.17698 | 0.048144 | 0.048144 |
| <b>Eif3a</b>     | -0.28405 | 0.047361 | 0.047361 |
| <b>Stard9</b>    | -0.67672 | 0.047413 | 0.047413 |
| <b>Gm9917</b>    | -1.03403 | 0.047413 | 0.047413 |
| <b>Cct6a</b>     | -0.3993  | 0.046412 | 0.046412 |
| <b>Apoe</b>      | -0.29661 | 0.046236 | 0.046236 |
| <b>Smpdl3a</b>   | -0.36941 | 0.04617  | 0.04617  |
| <b>Susd4</b>     | -2.76058 | 0.04643  | 0.04643  |
| <b>Ankrd6</b>    | -1.05259 | 0.045355 | 0.045355 |
| <b>Insig1</b>    | -1.00183 | 0.044622 | 0.044622 |
| <b>Slc66a2</b>   | -0.5792  | 0.044454 | 0.044454 |
| <b>Clic4</b>     | -0.22147 | 0.04387  | 0.04387  |
| <b>Stat1</b>     | -0.62184 | 0.043428 | 0.043428 |
| <b>Kcnv2</b>     | -0.87066 | 0.043125 | 0.043125 |
| <b>Rapgef4</b>   | -0.48708 | 0.042886 | 0.042886 |
| <b>Calu</b>      | -0.40576 | 0.042526 | 0.042526 |
| <b>Jade1</b>     | -0.60109 | 0.041909 | 0.041909 |
| <b>Rin2</b>      | -0.58032 | 0.04119  | 0.04119  |
| <b>Nfia</b>      | -0.37156 | 0.041125 | 0.041125 |
| <b>Tm7sf3</b>    | -0.55033 | 0.041125 | 0.041125 |
| <b>Trim44</b>    | -0.468   | 0.040022 | 0.040022 |
| <b>Trim30a</b>   | -0.61596 | 0.039818 | 0.039818 |

|                 |          |          |          |
|-----------------|----------|----------|----------|
| <b>Vcp</b>      | -0.32422 | 0.039565 | 0.039565 |
| <b>Flnb</b>     | -0.37088 | 0.039524 | 0.039524 |
| <b>Plk4</b>     | -2.35163 | 0.038886 | 0.038886 |
| <b>Itgb4</b>    | -1.15481 | 0.038127 | 0.038127 |
| <b>Nsrp1</b>    | -0.55519 | 0.037336 | 0.037336 |
| <b>Epas1</b>    | -0.16317 | 0.036415 | 0.036415 |
| <b>Acsf5</b>    | -0.62577 | 0.036578 | 0.036578 |
| <b>Itpr3</b>    | -0.53052 | 0.036311 | 0.036311 |
| <b>Entr1</b>    | -0.73172 | 0.036076 | 0.036076 |
| <b>Syt11</b>    | -0.83548 | 0.036076 | 0.036076 |
| <b>Ccser2</b>   | -0.36379 | 0.03583  | 0.03583  |
| <b>Rhoq</b>     | -0.66286 | 0.035552 | 0.035552 |
| <b>Tacc2</b>    | -0.85402 | 0.035393 | 0.035393 |
| <b>Ifnar1</b>   | -0.42986 | 0.03524  | 0.03524  |
| <b>Cd83</b>     | -1.70843 | 0.035061 | 0.035061 |
| <b>Gbp9</b>     | -0.66264 | 0.034515 | 0.034515 |
| <b>Atp11a</b>   | -0.56261 | 0.034482 | 0.034482 |
| <b>Trpv4</b>    | -0.89383 | 0.034482 | 0.034482 |
| <b>Abr</b>      | -0.55212 | 0.033678 | 0.033678 |
| <b>Ppp1r16b</b> | -0.61122 | 0.033398 | 0.033398 |
| <b>Npnt</b>     | -1.90804 | 0.033398 | 0.033398 |
| <b>Cetn3</b>    | -0.44154 | 0.033014 | 0.033014 |
| <b>Cep83</b>    | -0.80867 | 0.031932 | 0.031932 |
| <b>Pnpla6</b>   | -0.73269 | 0.031139 | 0.031139 |
| <b>Gbp2</b>     | -0.74583 | 0.030177 | 0.030177 |
| <b>Rassf8</b>   | -0.84437 | 0.029971 | 0.029971 |
| <b>Bcam</b>     | -0.35177 | 0.029309 | 0.029309 |
| <b>Pdxk</b>     | -0.50036 | 0.029211 | 0.029211 |
| <b>Trim34a</b>  | -0.89213 | 0.029068 | 0.029068 |
| <b>Sestd1</b>   | -0.9129  | 0.029    | 0.029    |
| <b>Pdgfb</b>    | -0.33888 | 0.028506 | 0.028506 |
| <b>Pik3cb</b>   | -0.98871 | 0.02856  | 0.02856  |
| <b>Creb5</b>    | -2.9994  | 0.028695 | 0.028695 |
| <b>Agap1</b>    | -0.59769 | 0.028013 | 0.028013 |
| <b>Gm15666</b>  | -1.20065 | 0.028061 | 0.028061 |
| <b>Dhcr24</b>   | -1.5425  | 0.028061 | 0.028061 |
| <b>Snx12</b>    | -1.02664 | 0.028013 | 0.028013 |
| <b>Notch1</b>   | -0.30641 | 0.027173 | 0.027173 |
| <b>Arhgef2</b>  | -0.46073 | 0.027026 | 0.027026 |
| <b>Mast4</b>    | -0.34387 | 0.026816 | 0.026816 |
| <b>Tapbpl</b>   | -0.9842  | 0.026868 | 0.026868 |
| <b>Psmc13</b>   | -0.54201 | 0.026154 | 0.026154 |
| <b>Gnas</b>     | -0.19703 | 0.025742 | 0.025742 |
| <b>Amot</b>     | -0.84847 | 0.025574 | 0.025574 |
| <b>Cables2</b>  | -0.78938 | 0.024456 | 0.024456 |
| <b>Gnpda2</b>   | -0.67455 | 0.024148 | 0.024148 |
| <b>Rida</b>     | -1.07261 | 0.024143 | 0.024143 |

|                 |          |          |          |
|-----------------|----------|----------|----------|
| <b>Cp</b>       | -0.35181 | 0.023609 | 0.023609 |
| <b>Megf9</b>    | -0.95716 | 0.023403 | 0.023403 |
| <b>Gm12250</b>  | -2.1353  | 0.022658 | 0.022658 |
| <b>Fermt2</b>   | -0.29591 | 0.021922 | 0.021922 |
| <b>Dnah8</b>    | -1.21992 | 0.021567 | 0.021567 |
| <b>Agrn</b>     | -0.44466 | 0.021449 | 0.021449 |
| <b>Elf1</b>     | -0.53969 | 0.021408 | 0.021408 |
| <b>Rasgrf2</b>  | -1.23002 | 0.02114  | 0.02114  |
| <b>Tm6sf1</b>   | -0.54319 | 0.020487 | 0.020487 |
| <b>Enpp4</b>    | -0.6246  | 0.019897 | 0.019897 |
| <b>Gper1</b>    | -0.8756  | 0.019912 | 0.019912 |
| <b>Foxq1</b>    | -0.29496 | 0.0196   | 0.0196   |
| <b>AU040320</b> | -1.01384 | 0.01955  | 0.01955  |
| <b>Mkrn1</b>    | -0.7367  | 0.019397 | 0.019397 |
| <b>Lrrc32</b>   | -0.75952 | 0.019116 | 0.019116 |
| <b>Ptprj</b>    | -0.74682 | 0.019038 | 0.019038 |
| <b>Trim65</b>   | -1.01975 | 0.018929 | 0.018929 |
| <b>Asb4</b>     | -1.12191 | 0.018837 | 0.018837 |
| <b>Prom1</b>    | -0.34392 | 0.01846  | 0.01846  |
| <b>Mindy1</b>   | -0.48069 | 0.01846  | 0.01846  |
| <b>Filip1</b>   | -0.50743 | 0.018009 | 0.018009 |
| <b>Ubtf</b>     | -0.56071 | 0.018009 | 0.018009 |
| <b>Rbm7</b>     | -0.50916 | 0.017631 | 0.017631 |
| <b>B2m</b>      | -0.23087 | 0.017609 | 0.017609 |
| <b>Gngt1</b>    | -0.30571 | 0.017443 | 0.017443 |
| <b>Snapc3</b>   | -1.09382 | 0.017452 | 0.017452 |
| <b>Chmp2a</b>   | -0.33917 | 0.01722  | 0.01722  |
| <b>Gm49266</b>  | -1.37673 | 0.017307 | 0.017307 |
| <b>Irgm1</b>    | -0.89802 | 0.01709  | 0.01709  |
| <b>Cdkn2b</b>   | -1.19668 | 0.017081 | 0.017081 |
| <b>Ushbp1</b>   | -0.45221 | 0.016554 | 0.016554 |
| <b>Ifit3</b>    | -1.08647 | 0.016505 | 0.016505 |
| <b>Sp100</b>    | -0.57291 | 0.01647  | 0.01647  |
| <b>Osbpl1a</b>  | -0.46622 | 0.016038 | 0.016038 |
| <b>Fut8</b>     | -0.50101 | 0.015902 | 0.015902 |
| <b>Akr1c14</b>  | -1.8055  | 0.015995 | 0.015995 |
| <b>Cct8</b>     | -0.51813 | 0.01576  | 0.01576  |
| <b>Actn4</b>    | -0.3112  | 0.01564  | 0.01564  |
| <b>Sfxn3</b>    | -0.75043 | 0.014573 | 0.014573 |
| <b>Iffo2</b>    | -1.11139 | 0.014305 | 0.014305 |
| <b>Msrb2</b>    | -1.2449  | 0.014001 | 0.014001 |
| <b>Gbp7</b>     | -0.60636 | 0.013747 | 0.013747 |
| <b>Jag1</b>     | -0.575   | 0.01357  | 0.01357  |
| <b>S100a4</b>   | -2.34063 | 0.013715 | 0.013715 |
| <b>Gbp5</b>     | -1.03026 | 0.013171 | 0.013171 |
| <b>Sncaip</b>   | -1.51059 | 0.012849 | 0.012849 |
| <b>Sp110</b>    | -0.86938 | 0.012752 | 0.012752 |

|                 |          |          |          |
|-----------------|----------|----------|----------|
| <b>Plat</b>     | -0.37094 | 0.012237 | 0.012237 |
| <b>Slc40a1</b>  | -0.67029 | 0.012155 | 0.012155 |
| <b>Bche</b>     | -2.75338 | 0.012292 | 0.012292 |
| <b>Pls3</b>     | -0.41362 | 0.011621 | 0.011621 |
| <b>Tfrc</b>     | -0.67229 | 0.011545 | 0.011545 |
| <b>Fchsd2</b>   | -0.83048 | 0.011391 | 0.011391 |
| <b>P4ha2</b>    | -1.07939 | 0.011074 | 0.011074 |
| <b>Irf9</b>     | -0.70592 | 0.010832 | 0.010832 |
| <b>Cx3cl1</b>   | -0.74858 | 0.010624 | 0.010624 |
| <b>Map7d1</b>   | -0.50711 | 0.010488 | 0.010488 |
| <b>Fbxl3</b>    | -0.61261 | 0.010491 | 0.010491 |
| <b>Cav2</b>     | -0.49845 | 0.010184 | 0.010184 |
| <b>Pdlim5</b>   | -0.43726 | 0.010152 | 0.010152 |
| <b>Ift172</b>   | -1.11728 | 0.010184 | 0.010184 |
| <b>Nsg2</b>     | -3.61663 | 0.009522 | 0.009522 |
| <b>Gm42892</b>  | -0.86676 | 0.009114 | 0.009114 |
| <b>Ttbk2</b>    | -0.98883 | 0.009111 | 0.009111 |
| <b>Rasgrp3</b>  | -0.5179  | 0.009011 | 0.009011 |
| <b>Sag</b>      | -0.35345 | 0.008536 | 0.008536 |
| <b>Fdps</b>     | -1.06129 | 0.008657 | 0.008657 |
| <b>Ifi47</b>    | -0.8982  | 0.008358 | 0.008358 |
| <b>Gja4</b>     | -0.75263 | 0.008034 | 0.008034 |
| <b>Lifr</b>     | -0.56426 | 0.007975 | 0.007975 |
| <b>Sox7</b>     | -0.77459 | 0.00779  | 0.00779  |
| <b>Ifih1</b>    | -0.79454 | 0.007594 | 0.007594 |
| <b>Rnf213</b>   | -0.74177 | 0.007485 | 0.007485 |
| <b>Kcnj2</b>    | -1.35854 | 0.007484 | 0.007484 |
| <b>Skida1</b>   | -1.66676 | 0.00734  | 0.00734  |
| <b>Hprt</b>     | -0.47133 | 0.007153 | 0.007153 |
| <b>Car7</b>     | -2.05901 | 0.00693  | 0.00693  |
| <b>Mir99ahg</b> | -1.40982 | 0.006935 | 0.006935 |
| <b>H2bc4</b>    | -0.43923 | 0.006771 | 0.006771 |
| <b>Pik3r3</b>   | -0.69362 | 0.006686 | 0.006686 |
| <b>Upf2</b>     | -0.65456 | 0.006534 | 0.006534 |
| <b>Chd3</b>     | -0.55279 | 0.006258 | 0.006258 |
| <b>Slc16a4</b>  | -0.85153 | 0.006152 | 0.006152 |
| <b>Cacybp</b>   | -0.61807 | 0.006002 | 0.006002 |
| <b>Trim8</b>    | -0.73258 | 0.005928 | 0.005928 |
| <b>Map4</b>     | -0.40172 | 0.005836 | 0.005836 |
| <b>Wnt5b</b>    | -2.13109 | 0.005557 | 0.005557 |
| <b>Ehd4</b>     | -0.53951 | 0.005368 | 0.005368 |
| <b>Psme2</b>    | -0.58398 | 0.005184 | 0.005184 |
| <b>Atxn1</b>    | -0.68344 | 0.005142 | 0.005142 |
| <b>Notch4</b>   | -0.67536 | 0.005059 | 0.005059 |
| <b>Cd320</b>    | -0.658   | 0.005005 | 0.005005 |
| <b>Smc1a</b>    | -0.48317 | 0.004603 | 0.004603 |
| <b>Arl2bp</b>   | -0.45563 | 0.004556 | 0.004556 |

|                  |          |          |          |
|------------------|----------|----------|----------|
| <b>Mcub</b>      | -1.02904 | 0.004566 | 0.004566 |
| <b>Rassf3</b>    | -0.50775 | 0.004431 | 0.004431 |
| <b>Mir6236</b>   | -0.42277 | 0.004215 | 0.004215 |
| <b>Ccdc88c</b>   | -1.14791 | 0.004301 | 0.004301 |
| <b>Plaat3</b>    | -0.59541 | 0.004212 | 0.004212 |
| <b>Acta2</b>     | -1.44989 | 0.004215 | 0.004215 |
| <b>Adam15</b>    | -0.43936 | 0.003966 | 0.003966 |
| <b>mt-Co2</b>    | -1.09782 | 0.003958 | 0.003958 |
| <b>Rapgef1</b>   | -0.69692 | 0.003909 | 0.003909 |
| <b>Ndufa4</b>    | -0.29596 | 0.003824 | 0.003824 |
| <b>Jup</b>       | -0.65501 | 0.003729 | 0.003729 |
| <b>Scd2</b>      | -0.77178 | 0.003637 | 0.003637 |
| <b>Hsp90aa1</b>  | -0.35274 | 0.00346  | 0.00346  |
| <b>Rhpn2</b>     | -1.22445 | 0.003371 | 0.003371 |
| <b>mt-Nd5</b>    | -0.3642  | 0.002826 | 0.002826 |
| <b>Dusp16</b>    | -1.29476 | 0.00277  | 0.00277  |
| <b>Nr3c1</b>     | -0.45348 | 0.002608 | 0.002608 |
| <b>Smarca2</b>   | -0.5291  | 0.002544 | 0.002544 |
| <b>Irf6</b>      | -3.06236 | 0.002636 | 0.002636 |
| <b>Gtf2i</b>     | -0.56351 | 0.00252  | 0.00252  |
| <b>Mgll</b>      | -0.61925 | 0.002391 | 0.002391 |
| <b>Glul</b>      | -0.31262 | 0.002301 | 0.002301 |
| <b>Usp18</b>     | -1.34782 | 0.002337 | 0.002337 |
| <b>Iqgap1</b>    | -0.33956 | 0.002226 | 0.002226 |
| <b>E230020D:</b> | -1.89472 | 0.002269 | 0.002269 |
| <b>Ebf1</b>      | -0.36427 | 0.00218  | 0.00218  |
| <b>Inpp1</b>     | -0.75058 | 0.002195 | 0.002195 |
| <b>Id2</b>       | -0.86594 | 0.002212 | 0.002212 |
| <b>Nhs12</b>     | -0.70198 | 0.002073 | 0.002073 |
| <b>Runx1t1</b>   | -1.37932 | 0.001871 | 0.001871 |
| <b>Tbx1</b>      | -0.62372 | 0.001772 | 0.001772 |
| <b>Fam114a1</b>  | -1.08444 | 0.001767 | 0.001767 |
| <b>Shtn1</b>     | -3.61916 | 0.00183  | 0.00183  |
| <b>Cd24a</b>     | -0.84664 | 0.001707 | 0.001707 |
| <b>Ddx5</b>      | -0.2517  | 0.00162  | 0.00162  |
| <b>Ceacam1</b>   | -0.69924 | 0.001602 | 0.001602 |
| <b>Lima1</b>     | -0.42641 | 0.001581 | 0.001581 |
| <b>Crip1</b>     | -0.36431 | 0.001551 | 0.001551 |
| <b>Elovl7</b>    | -0.61252 | 0.001494 | 0.001494 |
| <b>Tagln</b>     | -1.95744 | 0.001467 | 0.001467 |
| <b>Isyna1</b>    | -0.69908 | 0.001426 | 0.001426 |
| <b>Col8a1</b>    | -2.1809  | 0.001451 | 0.001451 |
| <b>Dync1li2</b>  | -0.76945 | 0.001388 | 0.001388 |
| <b>Adgrf5</b>    | -0.29875 | 0.00135  | 0.00135  |
| <b>Prss23</b>    | -0.60282 | 0.001304 | 0.001304 |
| <b>Phf11d</b>    | -1.26499 | 0.001292 | 0.001292 |
| <b>Nrep</b>      | -1.26808 | 0.001257 | 0.001257 |



|                 |          |          |          |
|-----------------|----------|----------|----------|
| <b>Apba1</b>    | -2.40683 | 0.001272 | 0.001272 |
| <b>Tgfb2</b>    | -0.60576 | 0.001207 | 0.001207 |
| <b>Alox12</b>   | -2.14799 | 0.001208 | 0.001208 |
| <b>Lars2</b>    | -0.50223 | 0.001075 | 0.001075 |
| <b>Bcl6b</b>    | -1.47343 | 0.001087 | 0.001087 |
| <b>Uqcc2</b>    | -0.52385 | 0.000959 | 0.000959 |
| <b>Tspan2</b>   | -1.07733 | 0.000958 | 0.000958 |
| <b>Tec</b>      | -2.09014 | 0.000893 | 0.000893 |
| <b>Spc25</b>    | -0.88688 | 0.000853 | 0.000853 |
| <b>Map4k2</b>   | -0.86619 | 0.000831 | 0.000831 |
| <b>mt-Co3</b>   | -0.93219 | 0.000805 | 0.000805 |
| <b>Tpgs2</b>    | -1.13898 | 0.000776 | 0.000776 |
| <b>Igtp</b>     | -1.0588  | 0.000752 | 0.000752 |
| <b>Trim12a</b>  | -1.07078 | 0.000748 | 0.000748 |
| <b>Cobll1</b>   | -0.58727 | 0.000677 | 0.000677 |
| <b>Gbp4</b>     | -0.99912 | 0.000679 | 0.000679 |
| <b>Fbln5</b>    | -2.74345 | 0.000709 | 0.000709 |
| <b>Hs3st1</b>   | -2.17195 | 0.000689 | 0.000689 |
| <b>Tmem100</b>  | -1.1422  | 0.000572 | 0.000572 |
| <b>Cthrc1</b>   | -0.66458 | 0.000567 | 0.000567 |
| <b>Calr</b>     | -0.47819 | 0.000566 | 0.000566 |
| <b>Plip</b>     | -0.68728 | 0.00056  | 0.00056  |
| <b>Dusp8</b>    | -0.98334 | 0.000513 | 0.000513 |
| <b>Oasl2</b>    | -0.94586 | 0.000502 | 0.000502 |
| <b>Pcp4l1</b>   | -0.44511 | 0.000466 | 0.000466 |
| <b>Crem</b>     | -1.13502 | 0.00047  | 0.00047  |
| <b>Prune2</b>   | -2.11132 | 0.000464 | 0.000464 |
| <b>Fbxo7</b>    | -1.03927 | 0.00042  | 0.00042  |
| <b>Gvin-ps7</b> | -0.71265 | 0.000414 | 0.000414 |
| <b>Ifit1</b>    | -1.02537 | 0.000417 | 0.000417 |
| <b>Mgst1</b>    | -1.14938 | 0.000408 | 0.000408 |
| <b>Lsr</b>      | -0.4741  | 0.00037  | 0.00037  |
| <b>Klf12</b>    | -1.01071 | 0.000368 | 0.000368 |
| <b>Fgd5</b>     | -0.58471 | 0.000357 | 0.000357 |
| <b>S1pr1</b>    | -0.34368 | 0.00035  | 0.00035  |
| <b>Antxr1</b>   | -2.09127 | 0.00032  | 0.00032  |
| <b>Clstn1</b>   | -0.51397 | 0.00024  | 0.00024  |
| <b>Gulp1</b>    | -1.00339 | 0.000243 | 0.000243 |
| <b>Fez1</b>     | -1.8727  | 0.000249 | 0.000249 |
| <b>A530083M</b> | -1.15831 | 0.000235 | 0.000235 |
| <b>Rtp4</b>     | -1.08626 | 0.000236 | 0.000236 |
| <b>Tpd52l1</b>  | -1.44487 | 0.000237 | 0.000237 |
| <b>Stard4</b>   | -1.06866 | 0.000193 | 0.000193 |
| <b>Layn</b>     | -1.48348 | 0.000197 | 0.000197 |
| <b>Tnfrsf19</b> | -0.77379 | 0.00018  | 0.00018  |
| <b>Plcg2</b>    | -1.83764 | 0.000181 | 0.000181 |
| <b>Tmem208</b>  | -0.93374 | 0.000162 | 0.000162 |

|                 |          |          |          |
|-----------------|----------|----------|----------|
| <b>Nuak1</b>    | -1.59801 | 0.000163 | 0.000163 |
| <b>Spata13</b>  | -1.07179 | 0.000158 | 0.000158 |
| <b>Kctd10</b>   | -0.66486 | 0.000153 | 0.000153 |
| <b>Sgms2</b>    | -0.97327 | 0.000151 | 0.000151 |
| <b>Crip2</b>    | -0.36155 | 0.000146 | 0.000146 |
| <b>Uaca</b>     | -0.60691 | 0.000145 | 0.000145 |
| <b>Rsad2</b>    | -1.45834 | 0.000141 | 0.000141 |
| <b>Ddc</b>      | -2.27539 | 0.000132 | 0.000132 |
| <b>C130074G</b> | -0.66346 | 0.000112 | 0.000112 |
| <b>Ret</b>      | -4.18569 | 0.00012  | 0.00012  |
| <b>Sipa1l2</b>  | -1.04248 | 0.000108 | 0.000108 |
| <b>Gm20559</b>  | -1.37295 | 0.000107 | 0.000107 |
| <b>Aplp2</b>    | -0.36417 | 0.000101 | 0.000101 |
| <b>Rho</b>      | -0.29749 | 9.63E-05 | 9.63E-05 |
| <b>Col5a2</b>   | -2.89205 | 9.52E-05 | 9.52E-05 |
| <b>Ldlr</b>     | -1.85763 | 8.47E-05 | 8.47E-05 |
| <b>Srp14</b>    | -0.53121 | 7.84E-05 | 7.84E-05 |
| <b>Dpy19l1</b>  | -1.03675 | 7.96E-05 | 7.96E-05 |
| <b>Mfsd2a</b>   | -0.73985 | 7.67E-05 | 7.67E-05 |
| <b>Mpzl1</b>    | -0.61215 | 5.52E-05 | 5.52E-05 |
| <b>Fkbp4</b>    | -0.81345 | 5.25E-05 | 5.25E-05 |
| <b>Pdgfa</b>    | -0.9636  | 4.81E-05 | 4.81E-05 |
| <b>Kank4</b>    | -1.73531 | 5.04E-05 | 5.04E-05 |
| <b>Cmpk2</b>    | -1.70724 | 4.92E-05 | 4.92E-05 |
| <b>Hsph1</b>    | -1.97751 | 4.84E-05 | 4.84E-05 |
| <b>Cit</b>      | -1.67173 | 4.59E-05 | 4.59E-05 |
| <b>Ankrd29</b>  | -2.92875 | 4.44E-05 | 4.44E-05 |
| <b>Stra6</b>    | -0.78212 | 4.00E-05 | 4.00E-05 |
| <b>Sorbs2</b>   | -0.52195 | 3.90E-05 | 3.90E-05 |
| <b>Ntn4</b>     | -1.56093 | 4.09E-05 | 4.09E-05 |
| <b>Islr2</b>    | -0.77274 | 3.73E-05 | 3.73E-05 |
| <b>Rnaset2a</b> | -1.19588 | 3.42E-05 | 3.42E-05 |
| <b>Lypd1</b>    | -2.94919 | 3.42E-05 | 3.42E-05 |
| <b>Palmd</b>    | -0.59633 | 2.66E-05 | 2.66E-05 |
| <b>Cav1</b>     | -0.86454 | 2.76E-05 | 2.76E-05 |
| <b>Frmd4b</b>   | -0.75861 | 2.48E-05 | 2.48E-05 |
| <b>Rasd1</b>    | -1.18994 | 2.37E-05 | 2.37E-05 |
| <b>mt-Atp6</b>  | -0.74245 | 2.26E-05 | 2.26E-05 |
| <b>Nr4a2</b>    | -1.17174 | 2.06E-05 | 2.06E-05 |
| <b>Srsf3</b>    | -0.53005 | 1.62E-05 | 1.62E-05 |
| <b>Efr3b</b>    | -0.68318 | 1.65E-05 | 1.65E-05 |
| <b>Ccnd2</b>    | -0.71921 | 1.60E-05 | 1.60E-05 |
| <b>Cavin2</b>   | -0.49991 | 1.54E-05 | 1.54E-05 |
| <b>Golim4</b>   | -0.56471 | 1.54E-05 | 1.54E-05 |
| <b>Nos3</b>     | -0.77384 | 1.36E-05 | 1.36E-05 |
| <b>Lama3</b>    | -3.6386  | 1.46E-05 | 1.46E-05 |
| <b>Sox13</b>    | -0.98125 | 1.30E-05 | 1.30E-05 |

|                   |          |          |          |
|-------------------|----------|----------|----------|
| <b>Timp2</b>      | -1.5141  | 1.14E-05 | 1.14E-05 |
| <b>Psmb10</b>     | -0.83626 | 1.04E-05 | 1.04E-05 |
| <b>Cyth3</b>      | -0.70032 | 8.26E-06 | 8.26E-06 |
| <b>Ifi27l2a</b>   | -3.64908 | 9.28E-06 | 9.28E-06 |
| <b>Far2</b>       | -1.84056 | 7.49E-06 | 7.49E-06 |
| <b>Gm9946</b>     | -2.17935 | 6.66E-06 | 6.66E-06 |
| <b>Reck</b>       | -0.78328 | 4.89E-06 | 4.89E-06 |
| <b>Dnaja1</b>     | -0.7126  | 4.40E-06 | 4.40E-06 |
| <b>Lrp8</b>       | -0.80355 | 4.38E-06 | 4.38E-06 |
| <b>Dst</b>        | -0.66905 | 3.53E-06 | 3.53E-06 |
| <b>Hsp90ab1</b>   | -0.36343 | 3.24E-06 | 3.24E-06 |
| <b>Ehd2</b>       | -0.74805 | 3.22E-06 | 3.22E-06 |
| <b>Isg15</b>      | -1.04387 | 2.95E-06 | 2.95E-06 |
| <b>Irf7</b>       | -1.30632 | 2.74E-06 | 2.74E-06 |
| <b>Ocln</b>       | -0.74332 | 2.49E-06 | 2.49E-06 |
| <b>mt-Atp8</b>    | -0.7685  | 2.46E-06 | 2.46E-06 |
| <b>Eln</b>        | -1.30326 | 1.73E-06 | 1.73E-06 |
| <b>Rapgef2</b>    | -0.80756 | 1.46E-06 | 1.46E-06 |
| <b>Bnip2</b>      | -0.60718 | 1.28E-06 | 1.28E-06 |
| <b>Syt15</b>      | -2.16128 | 1.47E-06 | 1.47E-06 |
| <b>Plk2</b>       | -0.75566 | 1.08E-06 | 1.08E-06 |
| <b>Atp2b4</b>     | -1.30682 | 9.22E-07 | 9.22E-07 |
| <b>Gbp3</b>       | -1.20169 | 8.22E-07 | 8.22E-07 |
| <b>Slc7a1</b>     | -0.78838 | 7.56E-07 | 7.56E-07 |
| <b>Jag2</b>       | -0.7908  | 7.68E-07 | 7.68E-07 |
| <b>Myo10</b>      | -0.68766 | 7.41E-07 | 7.41E-07 |
| <b>Anxa5</b>      | -0.59595 | 6.37E-07 | 6.37E-07 |
| <b>Htra1</b>      | -1.50316 | 4.73E-07 | 4.73E-07 |
| <b>Fam181b</b>    | -1.65945 | 4.41E-07 | 4.41E-07 |
| <b>St6galnac3</b> | -0.95559 | 3.83E-07 | 3.83E-07 |
| <b>Tspan13</b>    | -0.71342 | 1.91E-07 | 1.91E-07 |
| <b>Il10rb</b>     | -0.8148  | 1.40E-07 | 1.40E-07 |
| <b>Tubb2a</b>     | -1.09653 | 1.44E-07 | 1.44E-07 |
| <b>Lrrc49</b>     | -1.4071  | 1.38E-07 | 1.38E-07 |
| <b>Mndal</b>      | -1.19147 | 1.20E-07 | 1.20E-07 |
| <b>Mecom</b>      | -0.7127  | 9.66E-08 | 9.66E-08 |
| <b>Entpd1</b>     | -0.82609 | 9.13E-08 | 9.13E-08 |
| <b>mt-Nd1</b>     | -0.42193 | 9.09E-08 | 9.09E-08 |
| <b>Nebi</b>       | -0.62972 | 7.85E-08 | 7.85E-08 |
| <b>Xaf1</b>       | -1.01602 | 7.67E-08 | 7.67E-08 |
| <b>Cldn5</b>      | -0.40437 | 5.83E-08 | 5.83E-08 |
| <b>Eogt</b>       | -0.74046 | 6.36E-08 | 6.36E-08 |
| <b>Pmepa1</b>     | -0.93656 | 4.71E-08 | 4.71E-08 |
| <b>Sgms1</b>      | -0.48108 | 4.08E-08 | 4.08E-08 |
| <b>She</b>        | -0.82672 | 3.56E-08 | 3.56E-08 |
| <b>Atp2a3</b>     | -1.75053 | 3.96E-08 | 3.96E-08 |
| <b>Timp3</b>      | -0.62167 | 2.47E-08 | 2.47E-08 |

|                  |          |          |          |
|------------------|----------|----------|----------|
| <b>Fzd6</b>      | -0.93171 | 2.82E-08 | 2.82E-08 |
| <b>Olfml2a</b>   | -3.26805 | 2.06E-08 | 2.06E-08 |
| <b>Myl12a</b>    | -0.53695 | 1.34E-08 | 1.34E-08 |
| <b>Nes</b>       | -1.26592 | 1.30E-08 | 1.30E-08 |
| <b>Icam2</b>     | -0.83126 | 8.61E-09 | 8.61E-09 |
| <b>Dynll1</b>    | -0.58399 | 5.70E-09 | 5.70E-09 |
| <b>Macf1</b>     | -0.59498 | 4.48E-09 | 4.48E-09 |
| <b>Msx1</b>      | -2.5792  | 4.34E-09 | 4.34E-09 |
| <b>Col18a1</b>   | -2.53995 | 3.86E-09 | 3.86E-09 |
| <b>Atp13a3</b>   | -1.11371 | 1.42E-09 | 1.42E-09 |
| <b>Pi16</b>      | -2.8799  | 1.65E-09 | 1.65E-09 |
| <b>Sgpp2</b>     | -1.62054 | 6.07E-10 | 6.07E-10 |
| <b>Esyt2</b>     | -0.87459 | 3.23E-10 | 3.23E-10 |
| <b>Aif1l</b>     | -1.71217 | 2.53E-10 | 2.53E-10 |
| <b>Jcad</b>      | -0.66297 | 1.07E-10 | 1.07E-10 |
| <b>Cd2ap</b>     | -0.64517 | 8.92E-11 | 8.92E-11 |
| <b>Azin1</b>     | -1.59241 | 8.86E-11 | 8.86E-11 |
| <b>Dll4</b>      | -1.56019 | 6.32E-11 | 6.32E-11 |
| <b>Crispld1</b>  | -2.02867 | 4.03E-11 | 4.03E-11 |
| <b>Rsrp1</b>     | -0.74901 | 9.35E-12 | 9.35E-12 |
| <b>Rad54b</b>    | -2.26468 | 9.34E-12 | 9.34E-12 |
| <b>Gas6</b>      | -1.17964 | 2.90E-12 | 2.90E-12 |
| <b>Ifi203</b>    | -1.40096 | 2.40E-12 | 2.40E-12 |
| <b>Myl6</b>      | -0.51428 | 8.51E-13 | 8.51E-13 |
| <b>Gm28438</b>   | -0.93239 | 9.31E-13 | 9.31E-13 |
| <b>Bmx</b>       | -1.29619 | 4.55E-13 | 4.55E-13 |
| <b>Ptprm</b>     | -1.30434 | 2.32E-13 | 2.32E-13 |
| <b>Efnb2</b>     | -1.64355 | 1.91E-13 | 1.91E-13 |
| <b>Ptpr</b>      | -1.49168 | 1.73E-13 | 1.73E-13 |
| <b>Edn3</b>      | -2.2864  | 8.09E-14 | 8.09E-14 |
| <b>Tek</b>       | -0.86163 | 4.45E-14 | 4.45E-14 |
| <b>Unc5b</b>     | -1.85157 | 2.63E-14 | 2.63E-14 |
| <b>Cst3</b>      | -0.69659 | 1.13E-14 | 1.13E-14 |
| <b>Amd1</b>      | -1.76942 | 1.47E-14 | 1.47E-14 |
| <b>Tsc22d1</b>   | -0.67014 | 4.95E-15 | 4.95E-15 |
| <b>Tuba1a</b>    | -1.00729 | 6.72E-15 | 6.72E-15 |
| <b>mt-Nd4</b>    | -0.65029 | 2.46E-15 | 2.46E-15 |
| <b>Slc16a2</b>   | -1.53728 | 2.52E-15 | 2.52E-15 |
| <b>Rn18s-rs5</b> | -0.67834 | 6.88E-16 | 6.88E-16 |
| <b>Pltp</b>      | -0.67241 | 1.04E-15 | 1.04E-15 |
| <b>mt-Cytb</b>   | -0.55785 | 1.02E-15 | 1.02E-15 |
| <b>Eps8l2</b>    | -2.9715  | 1.20E-15 | 1.20E-15 |
| <b>Fbln2</b>     | -3.28187 | 1.17E-16 | 1.17E-16 |
| <b>St8sia6</b>   | -1.68641 | 2.28E-17 | 2.28E-17 |
| <b>Slc9a3r2</b>  | -0.87483 | 1.15E-17 | 1.15E-17 |
| <b>Utrn</b>      | -0.8965  | 1.12E-17 | 1.12E-17 |
| <b>Lmo7</b>      | -2.0051  | 8.58E-18 | 8.58E-18 |

|                |          |          |          |
|----------------|----------|----------|----------|
| <b>Gkn3</b>    | -6.83693 | 2.76E-18 | 2.76E-18 |
| <b>Itprid2</b> | -1.35507 | 6.04E-19 | 6.04E-19 |
| <b>mt-Nd2</b>  | -0.71925 | 3.96E-19 | 3.96E-19 |
| <b>Hey1</b>    | -1.91223 | 1.87E-19 | 1.87E-19 |
| <b>Cdk19</b>   | -1.52112 | 8.23E-20 | 8.23E-20 |
| <b>Emp2</b>    | -1.62136 | 9.30E-20 | 9.30E-20 |
| <b>Bsg</b>     | -0.90113 | 9.75E-21 | 9.75E-21 |
| <b>Ctnnb1</b>  | -0.90553 | 3.19E-21 | 3.19E-21 |
| <b>Egfl8</b>   | -2.67298 | 3.62E-21 | 3.62E-21 |
| <b>Sema3g</b>  | -1.59361 | 1.96E-22 | 1.96E-22 |
| <b>Kitl</b>    | -1.04879 | 1.04E-23 | 1.04E-23 |
| <b>mt-Rnr2</b> | -0.89295 | 6.32E-24 | 6.32E-24 |
| <b>mt-Rnr1</b> | -0.88063 | 1.52E-24 | 1.52E-24 |
| <b>Flt1</b>    | -0.64884 | 5.38E-26 | 5.38E-26 |
| <b>Ctsh</b>    | -1.39341 | 2.20E-25 | 2.20E-25 |
| <b>Vegfc</b>   | -4.43724 | 6.81E-27 | 6.81E-27 |
| <b>Spock2</b>  | -1.13681 | 5.39E-29 | 5.39E-29 |
| <b>Calm1</b>   | -0.68963 | 1.11E-30 | 1.11E-30 |
| <b>Slc6a6</b>  | -1.00579 | 2.29E-32 | 2.29E-32 |
| <b>Stmn2</b>   | -2.34471 | 3.36E-33 | 3.36E-33 |
| <b>Ptprb</b>   | -0.92323 | 2.09E-38 | 2.09E-38 |
| <b>Slco1c1</b> | -1.42988 | 7.54E-40 | 7.54E-40 |
| <b>Tm4sf1</b>  | -1.43848 | 2.67E-52 | 2.67E-52 |
| <b>Alpl</b>    | -3.33148 | 3.33E-56 | 3.33E-56 |
| <b>Ptn</b>     | -2.82157 | 1.17E-71 | 1.17E-71 |
| <b>Ltbp4</b>   | -3.14585 | 1.84E-84 | 1.84E-84 |
