# Supplementary material
Source: publisher figshare collection journal article supplement (https://diabetesjournals.figshare.com/articles/dataset/_/24550435)
Supplement: Supplementary file 6 [file 1]

|                | Mean expression level (z-score) |             |              |             | EC-C4 vs others |              |
|----------------|---------------------------------|-------------|--------------|-------------|-----------------|--------------|
|                | EC-C4                           | Aterial EC  | Capillary EC | Venous EC   | EC-C4_logfc     | EC-C4_pvalue |
| <b>Acer2</b>   | 0.88272065                      | 0.45875776  | 0.33787322   | 0.3342787   | 1.7799745       | 1.40E-114    |
| <b>Plpp1</b>   | 0.17589813                      | 0.16463016  | 0.08797513   | 0.093965605 | 0.94434065      | 1.68E-13     |
| <b>Sptlc2</b>  | 0.22856607                      | 0.17170541  | 0.14141275   | 0.16483597  | 0.661427        | 1.03E-10     |
| <b>Ugcg</b>    | 0.1104207                       | 0.041026097 | 0.042693395  | 0.06368257  | 1.2256371       | 4.19E-10     |
| <b>Kdsr</b>    | 0.16126795                      | 0.09316618  | 0.100978784  | 0.1022011   | 0.7229389       | 1.17E-08     |
| <b>Arsa</b>    | 0.06157482                      | 0.038385056 | 0.031246103  | 0.041293606 | 0.84687936      | 6.65E-05     |
| <b>Degs2</b>   | 0.27984115                      | 0.26856574  | 0.2260754    | 0.23605916  | 0.3060354       | 0.00040749   |
| <b>B4galt5</b> | 0.057927188                     | 0.04587839  | 0.034075793  | 0.03789403  | 0.7003734       | 0.00132379   |

**EC-C4\_padj**

1.16E-111

4.57E-12

2.25E-09

8.75E-09

2.07E-07

0.00066691

0.003342984

0.009352732
