# Supplementary material
Source: publisher figshare collection journal article supplement (https://diabetesjournals.figshare.com/articles/dataset/_/24550435)
Supplement: Supplementary file 7 [file 1]

| Gene      | Log fold ch | p-value | adjusted p-value |
|-----------|-------------|---------|------------------|
| Rp1       | 4.004956    | 0       | 0                |
| Sag       | 3.518874    | 0       | 0                |
| Rho       | 2.805436    | 0       | 0                |
| Pdc       | 3.428814    | 0       | 0                |
| Prph2     | 3.282281    | 0       | 0                |
| Rpgrip1   | 3.803375    | 0       | 0                |
| Cnga1     | 3.703772    | 0       | 0                |
| Pde6g     | 3.150364    | 0       | 0                |
| Tulp1     | 3.459747    | 0       | 0                |
| Rcvrn     | 3.30013     | 0       | 0                |
| Rom1      | 3.037566    | 0       | 0                |
| Gngt1     | 3.006897    | 0       | 0                |
| Gnat1     | 2.81208     | 0       | 0                |
| Guca1b    | 3.32971     | 0       | 0                |
| Nr2e3     | 3.636258    | 0       | 0                |
| Pde6b     | 3.400092    | 0       | 0                |
| Gnb1      | 2.463337    | 0       | 0                |
| Unc119    | 2.965646    | 0       | 0                |
| Mir124-2h | 3.420411    | 0       | 0                |
| Neurod1   | 3.683311    | 0       | 0                |
| Pde6a     | 3.310321    | 0       | 0                |
| Kcnb1     | 3.283769    | 0       | 0                |
| Mir124a-1 | 3.486187    | 0       | 0                |
| Cplx4     | 3.555861    | 0       | 0                |
| Nrl       | 3.133006    | 0       | 0                |
| Slc24a1   | 3.219855    | 0       | 0                |
| Marchf1   | 4.266141    | 0       | 0                |
| Rdh12     | 3.561881    | 0       | 0                |
| Map1b     | 3.175453    | 0       | 0                |
| Cngb1     | 3.155921    | 0       | 0                |
| Tma7      | 2.517447    | 0       | 0                |
| Rtbdn     | 3.28893     | 0       | 0                |
| Pex5l     | 3.558445    | 0       | 0                |
| Pcmtd2    | 2.935915    | 0       | 0                |
| Aipl1     | 3.208188    | 0       | 0                |
| Elovl4    | 3.174441    | 0       | 0                |
| Casz1     | 3.469569    | 0       | 0                |
| Agpat3    | 2.724918    | 0       | 0                |
| Slc17a7   | 2.986736    | 0       | 0                |
| Hk2       | 3.643732    | 0       | 0                |
| Al847159  | 3.45173     | 0       | 0                |
| Rgs9      | 3.750667    | 0       | 0                |
| Hsp90aa1  | 2.226052    | 0       | 0                |
| Crx       | 2.955066    | 0       | 0                |
| Prcd      | 3.044818    | 0       | 0                |
| Gnb5      | 2.8739      | 0       | 0                |

|          |          |   |   |
|----------|----------|---|---|
| Mpp4     | 3.180842 | 0 | 0 |
| Samd11   | 3.189308 | 0 | 0 |
| Rs1      | 2.884111 | 0 | 0 |
| Tlcd3b   | 2.813305 | 0 | 0 |
| Tmem108  | 4.373268 | 0 | 0 |
| Fam161a  | 3.147644 | 0 | 0 |
| Rims2    | 3.288331 | 0 | 0 |
| Grk1     | 2.988721 | 0 | 0 |
| A930003A | 3.123174 | 0 | 0 |
| Syt1     | 3.055788 | 0 | 0 |
| Reep6    | 2.758647 | 0 | 0 |
| Rgs9bp   | 2.957587 | 0 | 0 |
| Rbp3     | 2.539834 | 0 | 0 |
| Hmgn1    | 2.084388 | 0 | 0 |
| Ank2     | 2.965405 | 0 | 0 |
| Nxn12    | 3.259141 | 0 | 0 |
| Mak      | 3.46728  | 0 | 0 |
| Nxn11    | 3.512679 | 0 | 0 |
| Rabgef1  | 2.848869 | 0 | 0 |
| Cep164   | 3.140345 | 0 | 0 |
| Cabp4    | 3.254819 | 0 | 0 |
| Hcn1     | 3.070468 | 0 | 0 |
| Dmd      | 2.615232 | 0 | 0 |
| Wdr17    | 3.58693  | 0 | 0 |
| Sgip1    | 3.006007 | 0 | 0 |
| Drd4     | 3.089932 | 0 | 0 |
| Gucy2e   | 3.082498 | 0 | 0 |
| Epb41l2  | 2.120537 | 0 | 0 |
| Stx3     | 2.481311 | 0 | 0 |
| Slc4a7   | 3.09943  | 0 | 0 |
| Faim     | 2.524154 | 0 | 0 |
| Ldha     | 2.016814 | 0 | 0 |
| Camk2d   | 2.46486  | 0 | 0 |
| Kif1b    | 2.155968 | 0 | 0 |
| Pdzph1   | 3.480865 | 0 | 0 |
| Ndr3     | 2.62626  | 0 | 0 |
| Ebpl     | 2.575532 | 0 | 0 |
| Ankrd33b | 3.102238 | 0 | 0 |
| Kcnj14   | 2.988389 | 0 | 0 |
| Slc16a6  | 3.434123 | 0 | 0 |
| Gm48551  | 3.04106  | 0 | 0 |
| Glmn     | 3.262039 | 0 | 0 |
| Rufy3    | 2.727076 | 0 | 0 |
| Cep290   | 2.946728 | 0 | 0 |
| Vax2os   | 2.928799 | 0 | 0 |
| Abca4    | 2.823051 | 0 | 0 |
| Vldlr    | 3.145836 | 0 | 0 |

|          |          |   |   |
|----------|----------|---|---|
| Susd3    | 3.301898 | 0 | 0 |
| Madd     | 2.897341 | 0 | 0 |
| Epb41    | 2.330249 | 0 | 0 |
| Zdhhc2   | 3.566341 | 0 | 0 |
| Hspa4l   | 2.599147 | 0 | 0 |
| Osbp2    | 2.746031 | 0 | 0 |
| Stard7   | 2.7277   | 0 | 0 |
| Ccdc126  | 3.12033  | 0 | 0 |
| Amer2    | 3.065342 | 0 | 0 |
| Taok3    | 2.90766  | 0 | 0 |
| Ybx3     | 2.109483 | 0 | 0 |
| Dgke     | 2.769976 | 0 | 0 |
| Cited2   | 2.432471 | 0 | 0 |
| Cdhr1    | 2.911456 | 0 | 0 |
| Stk35    | 2.572542 | 0 | 0 |
| Dpf3     | 3.541764 | 0 | 0 |
| Smim40   | 2.56762  | 0 | 0 |
| Map2     | 2.630157 | 0 | 0 |
| Rp111    | 3.019595 | 0 | 0 |
| Otx2     | 2.965148 | 0 | 0 |
| Tnrc6b   | 2.051659 | 0 | 0 |
| Peg3     | 2.883069 | 0 | 0 |
| Sgk1     | 2.118526 | 0 | 0 |
| Gpsm2    | 3.272077 | 0 | 0 |
| Ankrd12  | 1.968172 | 0 | 0 |
| Cdr2     | 3.009837 | 0 | 0 |
| Fabp12   | 3.030722 | 0 | 0 |
| Kcnv2    | 2.969709 | 0 | 0 |
| Herc3    | 2.759225 | 0 | 0 |
| Slc31a2  | 2.569959 | 0 | 0 |
| Fam53b   | 3.003587 | 0 | 0 |
| H2aw     | 2.390802 | 0 | 0 |
| Cadm2    | 2.711434 | 0 | 0 |
| Fam3c    | 2.208635 | 0 | 0 |
| Klhl18   | 2.925397 | 0 | 0 |
| Ppp2r2b  | 3.115216 | 0 | 0 |
| Atp1a3   | 2.361146 | 0 | 0 |
| Tob2     | 2.270138 | 0 | 0 |
| Dpysl3   | 3.264133 | 0 | 0 |
| Lrit2    | 3.151997 | 0 | 0 |
| Tub      | 3.021347 | 0 | 0 |
| A430035B | 3.453219 | 0 | 0 |
| Ppm1n    | 3.495311 | 0 | 0 |
| Fsd1l    | 2.909535 | 0 | 0 |
| Macir    | 2.935102 | 0 | 0 |
| Snap25   | 2.358998 | 0 | 0 |
| Arl6     | 2.859031 | 0 | 0 |

|           |          |   |   |
|-----------|----------|---|---|
| Camsap1   | 2.665227 | 0 | 0 |
| Cdk2ap2   | 2.380093 | 0 | 0 |
| Impg2     | 3.136183 | 0 | 0 |
| Ip6k2     | 2.791495 | 0 | 0 |
| Impg1     | 3.416932 | 0 | 0 |
| Meis2     | 3.126823 | 0 | 0 |
| Pla2r1    | 2.996111 | 0 | 0 |
| Pcbp4     | 2.284987 | 0 | 0 |
| Bbs7      | 3.117667 | 0 | 0 |
| Cacna2d4  | 2.882135 | 0 | 0 |
| Arhgef26  | 3.121111 | 0 | 0 |
| A930036K  | 3.379236 | 0 | 0 |
| Upf3b     | 2.263309 | 0 | 0 |
| Pcare     | 3.069381 | 0 | 0 |
| Adipor1   | 1.871621 | 0 | 0 |
| Rnf207    | 3.333519 | 0 | 0 |
| Ahi1      | 2.343347 | 0 | 0 |
| Stxbp1    | 2.100285 | 0 | 0 |
| Aldoa     | 1.458073 | 0 | 0 |
| Gm19667   | 4.036808 | 0 | 0 |
| Man2a2    | 2.295507 | 0 | 0 |
| 3010001F1 | 3.011028 | 0 | 0 |
| Pitpnm3   | 3.066051 | 0 | 0 |
| Ypel2     | 2.638047 | 0 | 0 |
| Lyar      | 2.235645 | 0 | 0 |
| Usp2      | 2.723263 | 0 | 0 |
| Rorb      | 2.040411 | 0 | 0 |
| Nt5e      | 3.159748 | 0 | 0 |
| Ankrd33   | 3.13461  | 0 | 0 |
| Tnfaip3   | 2.809206 | 0 | 0 |
| Atp8a2    | 3.408033 | 0 | 0 |
| Cds1      | 2.921505 | 0 | 0 |
| Cacnb2    | 3.092691 | 0 | 0 |
| Dlg4      | 2.443198 | 0 | 0 |
| Esrrb     | 3.049651 | 0 | 0 |
| Nim1k     | 2.871849 | 0 | 0 |
| Pcdh15    | 3.148392 | 0 | 0 |
| Pak5      | 3.687002 | 0 | 0 |
| Mab21l1   | 2.826823 | 0 | 0 |
| Syp       | 2.510367 | 0 | 0 |
| Rhot1     | 2.344672 | 0 | 0 |
| Msi2      | 1.700424 | 0 | 0 |
| Crif3     | 2.314169 | 0 | 0 |
| Grtp1     | 2.825014 | 0 | 0 |
| Fscn2     | 3.085488 | 0 | 0 |
| Plekhf2   | 2.382561 | 0 | 0 |
| Gramd1b   | 2.550013 | 0 | 0 |

|           |          |   |   |
|-----------|----------|---|---|
| Anp32e    | 1.80402  | 0 | 0 |
| Sv2b      | 2.62969  | 0 | 0 |
| Strbp     | 2.349802 | 0 | 0 |
| Pkm       | 1.414204 | 0 | 0 |
| D16Ertd47 | 2.648626 | 0 | 0 |
| Icmt      | 2.45036  | 0 | 0 |
| Usp33     | 2.344418 | 0 | 0 |
| Tlcd5     | 2.747137 | 0 | 0 |
| Mdm1      | 2.970689 | 0 | 0 |
| Hif1a     | 1.745964 | 0 | 0 |
| Unc13b    | 2.047771 | 0 | 0 |
| Tbc1d24   | 2.906036 | 0 | 0 |
| Arl4d     | 2.267972 | 0 | 0 |
| Kmt2a     | 1.732468 | 0 | 0 |
| Kif21b    | 2.86671  | 0 | 0 |
| Snrnp70   | 1.733477 | 0 | 0 |
| Gm11961   | 3.448673 | 0 | 0 |
| Trpc1     | 2.644723 | 0 | 0 |
| Hook1     | 2.623311 | 0 | 0 |
| Glb1l2    | 3.035389 | 0 | 0 |
| C2cd2l    | 2.39708  | 0 | 0 |
| Ttc8      | 2.78763  | 0 | 0 |
| Fam169a   | 1.822981 | 0 | 0 |
| A930006lC | 3.234364 | 0 | 0 |
| Gm47647   | 3.25063  | 0 | 0 |
| Fbxl5     | 2.011871 | 0 | 0 |
| Lgalsl    | 1.937836 | 0 | 0 |
| Pcbp2     | 1.337705 | 0 | 0 |
| Atp11b    | 1.977172 | 0 | 0 |
| Kdm5b     | 2.008314 | 0 | 0 |
| Pitpnm1   | 2.330712 | 0 | 0 |
| Slc25a33  | 2.426371 | 0 | 0 |
| Xiap      | 1.65635  | 0 | 0 |
| Malat1    | 1.294219 | 0 | 0 |
| Lca5      | 3.049127 | 0 | 0 |
| Eml5      | 2.667067 | 0 | 0 |
| Rd3       | 2.840307 | 0 | 0 |
| Gucy2f    | 3.122257 | 0 | 0 |
| Snap91    | 2.643831 | 0 | 0 |
| Cspp1     | 2.188965 | 0 | 0 |
| Adcy1     | 3.011976 | 0 | 0 |
| Agpat5    | 2.295295 | 0 | 0 |
| Ddhd1     | 2.42577  | 0 | 0 |
| Hs3st3b1  | 3.209931 | 0 | 0 |
| Gm11342   | 4.191917 | 0 | 0 |
| Tmem237   | 2.428675 | 0 | 0 |
| Nlk       | 2.132791 | 0 | 0 |

|          |          |   |   |
|----------|----------|---|---|
| Nktr     | 1.727688 | 0 | 0 |
| Rsrp1    | 1.391718 | 0 | 0 |
| Ckmt1    | 3.23673  | 0 | 0 |
| Chd7     | 2.101755 | 0 | 0 |
| Dyrk2    | 2.272521 | 0 | 0 |
| Tomm20   | 1.588463 | 0 | 0 |
| Lrit1    | 2.905241 | 0 | 0 |
| Wdr47    | 2.445759 | 0 | 0 |
| Ktn1     | 1.579313 | 0 | 0 |
| Dmxl2    | 2.385268 | 0 | 0 |
| C1ql3    | 3.714381 | 0 | 0 |
| Arl3     | 1.764382 | 0 | 0 |
| Vopp1    | 2.553546 | 0 | 0 |
| Uckl1    | 2.423067 | 0 | 0 |
| Chchd10  | 1.922293 | 0 | 0 |
| Ndufs2   | 1.700355 | 0 | 0 |
| Dnai4    | 3.045978 | 0 | 0 |
| Impdh1   | 1.784137 | 0 | 0 |
| Slc26a2  | 2.699336 | 0 | 0 |
| Tdrd7    | 2.284126 | 0 | 0 |
| Peli3    | 3.207207 | 0 | 0 |
| Gm15706  | 2.898711 | 0 | 0 |
| Camk1d   | 2.869005 | 0 | 0 |
| Fyco1    | 1.771616 | 0 | 0 |
| Laptm4b  | 2.021949 | 0 | 0 |
| Gm47160  | 3.303547 | 0 | 0 |
| Bicdl1   | 2.698105 | 0 | 0 |
| A930003O | 3.485464 | 0 | 0 |
| Hmgn2    | 2.057005 | 0 | 0 |
| Gnaz     | 2.942044 | 0 | 0 |
| Ddx5     | 1.064377 | 0 | 0 |
| Ppargc1a | 3.185614 | 0 | 0 |
| Kdm4c    | 2.326349 | 0 | 0 |
| Gramd2   | 3.1336   | 0 | 0 |
| Got1     | 2.316317 | 0 | 0 |
| Optn     | 2.597161 | 0 | 0 |
| Celf2    | 2.052609 | 0 | 0 |
| Sntb2    | 2.1331   | 0 | 0 |
| Acs11    | 2.509533 | 0 | 0 |
| Plk5     | 2.499885 | 0 | 0 |
| Tnpo1    | 1.761695 | 0 | 0 |
| Napb     | 2.361612 | 0 | 0 |
| Pclo     | 2.707675 | 0 | 0 |
| Mapre3   | 2.152868 | 0 | 0 |
| Sh2d1a   | 3.280133 | 0 | 0 |
| Katnip   | 2.491577 | 0 | 0 |
| Atp1b2   | 1.587626 | 0 | 0 |

|           |          |   |   |
|-----------|----------|---|---|
| A530058N  | 2.784457 | 0 | 0 |
| Cadm1     | 1.753798 | 0 | 0 |
| Samd7     | 3.333219 | 0 | 0 |
| Guk1      | 1.722363 | 0 | 0 |
| Galnt7    | 2.373694 | 0 | 0 |
| Ssu72     | 1.598459 | 0 | 0 |
| Ahcyl1    | 1.674394 | 0 | 0 |
| Grina     | 1.74771  | 0 | 0 |
| Memo1     | 2.450534 | 0 | 0 |
| Bzw2      | 2.334481 | 0 | 0 |
| Lbhd1     | 2.931945 | 0 | 0 |
| Cdk5r2    | 2.843257 | 0 | 0 |
| Gapdh     | 1.27174  | 0 | 0 |
| Hnrnpu    | 1.348634 | 0 | 0 |
| Slc25a25  | 2.588738 | 0 | 0 |
| Wdr31     | 3.464128 | 0 | 0 |
| Crb1      | 2.084036 | 0 | 0 |
| Kif21a    | 2.063696 | 0 | 0 |
| 3222401L1 | 2.42711  | 0 | 0 |
| Zfp385a   | 1.945283 | 0 | 0 |
| Crocc     | 2.476963 | 0 | 0 |
| Ap2a2     | 1.835648 | 0 | 0 |
| E130310I0 | 3.065511 | 0 | 0 |
| Prom1     | 1.436038 | 0 | 0 |
| Gm47543   | 3.050043 | 0 | 0 |
| Lpgat1    | 2.092005 | 0 | 0 |
| Arl13b    | 2.324934 | 0 | 0 |
| Prkca     | 2.453298 | 0 | 0 |
| Ccdc107   | 2.000801 | 0 | 0 |
| Trafd1    | 2.079968 | 0 | 0 |
| Npepps    | 1.895051 | 0 | 0 |
| Fhod3     | 3.359451 | 0 | 0 |
| Epb41l5   | 2.574194 | 0 | 0 |
| Pfkfb2    | 2.831188 | 0 | 0 |
| Ppa1      | 2.228469 | 0 | 0 |
| Ints13    | 2.374693 | 0 | 0 |
| Ubap1l    | 3.634459 | 0 | 0 |
| Dscaml1   | 2.981106 | 0 | 0 |
| Gm19445   | 4.189411 | 0 | 0 |
| lpmk      | 2.183232 | 0 | 0 |
| Eno2      | 2.252463 | 0 | 0 |
| Srrm3     | 2.932534 | 0 | 0 |
| Zfp654    | 2.348613 | 0 | 0 |
| Spata1    | 3.051119 | 0 | 0 |
| Nadk2     | 2.234717 | 0 | 0 |
| Cers4     | 1.659623 | 0 | 0 |
| Aqp1      | 2.913587 | 0 | 0 |

|          |          |   |   |
|----------|----------|---|---|
| Atxn1    | 1.89593  | 0 | 0 |
| Frmd4b   | 1.663036 | 0 | 0 |
| Bhlhe41  | 2.415136 | 0 | 0 |
| Frmpd2   | 3.063648 | 0 | 0 |
| Rsrc2    | 1.432761 | 0 | 0 |
| Unc80    | 2.524242 | 0 | 0 |
| Ppm1b    | 1.951722 | 0 | 0 |
| Bbs5     | 2.853781 | 0 | 0 |
| Ric8b    | 2.347118 | 0 | 0 |
| Scg5     | 2.170062 | 0 | 0 |
| Cxxc4    | 2.58588  | 0 | 0 |
| Slc1a2   | 1.81365  | 0 | 0 |
| A930001M | 3.311131 | 0 | 0 |
| Adgrv1   | 2.696768 | 0 | 0 |
| Tln2     | 2.267946 | 0 | 0 |
| Mef2d    | 1.753145 | 0 | 0 |
| Phlpp2   | 2.536006 | 0 | 0 |
| Gm9856   | 3.377369 | 0 | 0 |
| Pbx3     | 2.343142 | 0 | 0 |
| Pla2g7   | 2.627164 | 0 | 0 |
| 5330431K | 3.632426 | 0 | 0 |
| Hk1      | 1.735768 | 0 | 0 |
| Smim13   | 2.252164 | 0 | 0 |
| Gm37764  | 3.77149  | 0 | 0 |
| Hmgb2    | 1.628378 | 0 | 0 |
| Rasgrf2  | 2.536011 | 0 | 0 |
| Bbs4     | 2.483539 | 0 | 0 |
| Bbs9     | 2.918738 | 0 | 0 |
| Plcxd2   | 3.074204 | 0 | 0 |
| Rora     | 1.631455 | 0 | 0 |
| Tet3     | 1.824343 | 0 | 0 |
| Vps37a   | 1.919701 | 0 | 0 |
| Fam171b  | 1.97729  | 0 | 0 |
| Gm10544  | 3.178637 | 0 | 0 |
| Rncr4    | 3.268401 | 0 | 0 |
| Srsf1    | 1.571029 | 0 | 0 |
| 4632427E | 1.815573 | 0 | 0 |
| Tax1bp1  | 1.242542 | 0 | 0 |
| Tmem150  | 2.846921 | 0 | 0 |
| Camta1   | 1.845449 | 0 | 0 |
| Ppargc1b | 2.732858 | 0 | 0 |
| Aak1     | 1.878035 | 0 | 0 |
| Psd      | 2.686954 | 0 | 0 |
| Ndufa4   | 1.158701 | 0 | 0 |
| Krt18    | 2.714007 | 0 | 0 |
| Bin1     | 2.147825 | 0 | 0 |
| Clcn3    | 1.59744  | 0 | 0 |



|          |          |   |   |
|----------|----------|---|---|
| Lhfp13   | 3.286613 | 0 | 0 |
| Tusc3    | 2.011152 | 0 | 0 |
| Ppip5k1  | 2.495369 | 0 | 0 |
| Ppef2    | 2.985331 | 0 | 0 |
| Elfn1    | 3.1579   | 0 | 0 |
| Nbea     | 1.807353 | 0 | 0 |
| Whrn     | 3.015918 | 0 | 0 |
| Med13l   | 1.642448 | 0 | 0 |
| Map7     | 1.790401 | 0 | 0 |
| Jarid2   | 1.937603 | 0 | 0 |
| Cnrip1   | 2.507316 | 0 | 0 |
| Ptp4a3   | 1.395194 | 0 | 0 |
| Otx2os1  | 3.208035 | 0 | 0 |
| Frmpd1   | 2.75076  | 0 | 0 |
| Rgs20    | 3.20603  | 0 | 0 |
| Fgd4     | 2.453676 | 0 | 0 |
| Srpk2    | 1.611205 | 0 | 0 |
| Gm20139  | 3.941969 | 0 | 0 |
| Abcg1    | 2.534968 | 0 | 0 |
| Cacna1f  | 2.540083 | 0 | 0 |
| Pacsin1  | 2.30732  | 0 | 0 |
| Tnfsf12  | 1.714883 | 0 | 0 |
| Vamp2    | 1.503049 | 0 | 0 |
| Ammecr1  | 2.484626 | 0 | 0 |
| Slco4a1  | 2.889303 | 0 | 0 |
| Sdc4     | 2.229029 | 0 | 0 |
| Plch2    | 2.36655  | 0 | 0 |
| Dync2i1  | 2.724376 | 0 | 0 |
| Sec22a   | 2.321579 | 0 | 0 |
| Synj1    | 1.840362 | 0 | 0 |
| Ahr      | 2.950597 | 0 | 0 |
| Uckl1os  | 3.296679 | 0 | 0 |
| Lpcat1   | 1.936041 | 0 | 0 |
| Zfp36l2  | 1.494127 | 0 | 0 |
| St8sia1  | 2.565034 | 0 | 0 |
| C2cd5    | 2.272511 | 0 | 0 |
| Ntm      | 2.443911 | 0 | 0 |
| Me1      | 2.643409 | 0 | 0 |
| Pgam1    | 1.357765 | 0 | 0 |
| Gas7     | 3.19794  | 0 | 0 |
| Atp6v0b  | 1.33108  | 0 | 0 |
| Acsf6    | 2.215668 | 0 | 0 |
| Zranb1   | 1.643881 | 0 | 0 |
| 2810030D | 3.275581 | 0 | 0 |
| Sp4      | 2.079382 | 0 | 0 |
| Zfp444   | 2.205791 | 0 | 0 |
| Cul5     | 1.73589  | 0 | 0 |

|          |          |   |   |
|----------|----------|---|---|
| Ncam1    | 1.692202 | 0 | 0 |
| Mat2a    | 1.308063 | 0 | 0 |
| Thrb     | 2.716819 | 0 | 0 |
| Baz2b    | 1.356789 | 0 | 0 |
| Polg2    | 2.779845 | 0 | 0 |
| Zfp516   | 2.012734 | 0 | 0 |
| Zfyve28  | 3.059453 | 0 | 0 |
| Zcchc7   | 1.581436 | 0 | 0 |
| Sik2     | 2.841445 | 0 | 0 |
| Pdia5    | 2.705571 | 0 | 0 |
| Ccndbp1  | 1.878465 | 0 | 0 |
| Nsf      | 1.682253 | 0 | 0 |
| Msi1     | 1.702601 | 0 | 0 |
| Rrp1b    | 2.435921 | 0 | 0 |
| Hsbp1l1  | 2.891245 | 0 | 0 |
| Ppp3cc   | 2.137198 | 0 | 0 |
| Rnf157   | 2.5524   | 0 | 0 |
| Ssbp2    | 1.850549 | 0 | 0 |
| Igsf9    | 3.135531 | 0 | 0 |
| Serinc4  | 3.144395 | 0 | 0 |
| Wdr20    | 2.22457  | 0 | 0 |
| Ccdc24   | 3.340196 | 0 | 0 |
| Sys1     | 1.605352 | 0 | 0 |
| Atp2b1   | 1.32335  | 0 | 0 |
| Anp32a   | 1.075236 | 0 | 0 |
| Tra2a    | 1.353738 | 0 | 0 |
| Ikzf2    | 2.871137 | 0 | 0 |
| Rax      | 1.760992 | 0 | 0 |
| Steap2   | 2.57493  | 0 | 0 |
| Zfp536   | 2.231997 | 0 | 0 |
| Dnm3     | 1.576988 | 0 | 0 |
| Kpna2    | 3.16119  | 0 | 0 |
| Slc12a5  | 2.014646 | 0 | 0 |
| Traf3ip3 | 3.068405 | 0 | 0 |
| Wapl     | 1.422072 | 0 | 0 |
| Ppfia2   | 2.768313 | 0 | 0 |
| Mpped2   | 2.591026 | 0 | 0 |
| Plekha8  | 2.291034 | 0 | 0 |
| Ubn2     | 1.462043 | 0 | 0 |
| Cst3     | 1.029283 | 0 | 0 |
| Ttc19    | 1.97882  | 0 | 0 |
| 4632415L | 2.086305 | 0 | 0 |
| Gm45153  | 4.395085 | 0 | 0 |
| Rpgr     | 2.76861  | 0 | 0 |
| Dixdc1   | 2.010808 | 0 | 0 |
| Pnir     | 1.256004 | 0 | 0 |
| N4bp2    | 2.488354 | 0 | 0 |

|          |          |   |   |
|----------|----------|---|---|
| Top2b    | 1.377659 | 0 | 0 |
| Zfp329   | 1.896161 | 0 | 0 |
| Klc3     | 2.49016  | 0 | 0 |
| Atf4     | 1.342884 | 0 | 0 |
| Arhgap5  | 1.20106  | 0 | 0 |
| Tmem138  | 2.78118  | 0 | 0 |
| Lurap1l  | 2.220752 | 0 | 0 |
| Atad2b   | 1.887319 | 0 | 0 |
| Scamp5   | 2.250119 | 0 | 0 |
| Gm17231  | 3.836474 | 0 | 0 |
| Diaph3   | 3.08386  | 0 | 0 |
| Zfp644   | 1.361037 | 0 | 0 |
| Uqcc3    | 1.53714  | 0 | 0 |
| Meis1    | 2.684762 | 0 | 0 |
| Chd9     | 1.656385 | 0 | 0 |
| Gpatch8  | 1.468331 | 0 | 0 |
| Pip4k2c  | 2.047144 | 0 | 0 |
| Styx     | 2.514351 | 0 | 0 |
| Rab28    | 1.654223 | 0 | 0 |
| Cirbp    | 1.308273 | 0 | 0 |
| Cul3     | 1.383658 | 0 | 0 |
| Gpr137c  | 2.666078 | 0 | 0 |
| Pde6d    | 1.869579 | 0 | 0 |
| Gm45716  | 2.425871 | 0 | 0 |
| Ppp1r42  | 3.414938 | 0 | 0 |
| Insm1    | 3.331888 | 0 | 0 |
| Rhot2    | 2.069775 | 0 | 0 |
| Agtppbp1 | 1.814328 | 0 | 0 |
| Cep250   | 2.034033 | 0 | 0 |
| Slc38a9  | 2.120298 | 0 | 0 |
| H1f2     | 1.52456  | 0 | 0 |
| Ndufa10  | 1.484923 | 0 | 0 |
| Gm49599  | 1.93148  | 0 | 0 |
| Trib2    | 1.605107 | 0 | 0 |
| Negr1    | 2.339204 | 0 | 0 |
| Suv39h2  | 3.236997 | 0 | 0 |
| Zfp445   | 1.622203 | 0 | 0 |
| Cpe      | 1.271946 | 0 | 0 |
| Ccdc177  | 2.700208 | 0 | 0 |
| Plekhb1  | 1.419431 | 0 | 0 |
| Eid1     | 1.194963 | 0 | 0 |
| Ttc39c   | 2.959198 | 0 | 0 |
| Xylt1    | 3.027481 | 0 | 0 |
| Tbcc     | 2.024075 | 0 | 0 |
| Son      | 0.927765 | 0 | 0 |
| Aff1     | 1.737326 | 0 | 0 |
| Guca1a   | 2.148384 | 0 | 0 |

|          |          |   |   |
|----------|----------|---|---|
| Ccdc173  | 2.896483 | 0 | 0 |
| Otud7b   | 1.65484  | 0 | 0 |
| Fam222a  | 3.056775 | 0 | 0 |
| Sh3bgrl2 | 2.316713 | 0 | 0 |
| Rbm25    | 1.16879  | 0 | 0 |
| Zfp365   | 2.211047 | 0 | 0 |
| A330094K | 2.986141 | 0 | 0 |
| Rnf150   | 2.164072 | 0 | 0 |
| Zfp385b  | 2.447814 | 0 | 0 |
| Zmynd8   | 1.564893 | 0 | 0 |
| Dalrd3   | 2.147506 | 0 | 0 |
| E430021H | 3.108929 | 0 | 0 |
| Pcsk1n   | 1.718859 | 0 | 0 |
| Uhmk1    | 1.599525 | 0 | 0 |
| Lztfl1   | 1.804053 | 0 | 0 |
| Klhl3    | 2.379268 | 0 | 0 |
| Gpr152   | 3.372926 | 0 | 0 |
| Hnrnph3  | 1.372223 | 0 | 0 |
| Csnk1g1  | 1.7541   | 0 | 0 |
| Gm14091  | 3.576309 | 0 | 0 |
| Trim2    | 1.676289 | 0 | 0 |
| Tcf20    | 1.813808 | 0 | 0 |
| Mef2c    | 1.129011 | 0 | 0 |
| Pde4dip  | 2.007597 | 0 | 0 |
| Zcchc3   | 2.397565 | 0 | 0 |
| Ccn4     | 3.229908 | 0 | 0 |
| Plagl2   | 2.302232 | 0 | 0 |
| Ric3     | 2.837538 | 0 | 0 |
| Ift81    | 2.15995  | 0 | 0 |
| Slc6a6   | 0.943699 | 0 | 0 |
| Ppa2     | 1.848094 | 0 | 0 |
| Kansl1l  | 1.903467 | 0 | 0 |
| Utp3     | 1.646901 | 0 | 0 |
| CntlIn   | 1.698414 | 0 | 0 |
| Socs7    | 1.83163  | 0 | 0 |
| Purb     | 1.008369 | 0 | 0 |
| Abca13   | 3.818622 | 0 | 0 |
| Vezf1    | 1.264138 | 0 | 0 |
| Ctbp2    | 1.440953 | 0 | 0 |
| Gm5297   | 4.280481 | 0 | 0 |
| Klhl36   | 2.477559 | 0 | 0 |
| Crebzf   | 1.707071 | 0 | 0 |
| Oip5os1  | 1.103205 | 0 | 0 |
| Itfg2    | 2.236229 | 0 | 0 |
| Taf4b    | 2.942064 | 0 | 0 |
| Paqr4    | 2.031628 | 0 | 0 |
| Wdtdc1   | 1.898172 | 0 | 0 |

|           |          |   |   |
|-----------|----------|---|---|
| Fam193a   | 1.478533 | 0 | 0 |
| Gls       | 1.264612 | 0 | 0 |
| Syne2     | 1.36206  | 0 | 0 |
| Plpp2     | 2.62411  | 0 | 0 |
| Slc25a5   | 1.17191  | 0 | 0 |
| Mtcl1     | 2.033188 | 0 | 0 |
| Tube1     | 3.437101 | 0 | 0 |
| Cerkl     | 3.181634 | 0 | 0 |
| Elovl2    | 2.918094 | 0 | 0 |
| Nfasc     | 2.287022 | 0 | 0 |
| Pitpnm2os | 3.615287 | 0 | 0 |
| Dctn1     | 1.391559 | 0 | 0 |
| Ralgps2   | 1.75609  | 0 | 0 |
| Mbnl2     | 1.121426 | 0 | 0 |
| Tmem63b   | 1.720149 | 0 | 0 |
| Sugp2     | 2.213994 | 0 | 0 |
| Tspan7    | 1.457578 | 0 | 0 |
| Dnajc5    | 1.330076 | 0 | 0 |
| Ttc14     | 1.271831 | 0 | 0 |
| Gm43011   | 2.711544 | 0 | 0 |
| Pnn       | 1.250149 | 0 | 0 |
| Eps8      | 1.924492 | 0 | 0 |
| Gm7546    | 4.1758   | 0 | 0 |
| Dennd10   | 1.759826 | 0 | 0 |
| Gucd1     | 2.441928 | 0 | 0 |
| Pacsin2   | 1.56823  | 0 | 0 |
| B230220B  | 3.15071  | 0 | 0 |
| Arid3b    | 2.41718  | 0 | 0 |
| Arhgap24  | 2.706879 | 0 | 0 |
| Sema3f    | 2.270229 | 0 | 0 |
| Syt14     | 2.812295 | 0 | 0 |
| Crb2      | 2.826285 | 0 | 0 |
| Prkcz     | 2.619548 | 0 | 0 |
| Skida1    | 2.484271 | 0 | 0 |
| A330023F  | 2.151596 | 0 | 0 |
| Smug1     | 2.298291 | 0 | 0 |
| Cep126    | 2.690895 | 0 | 0 |
| Lmnb1     | 2.35422  | 0 | 0 |
| Bbs1      | 2.59     | 0 | 0 |
| Cecr2     | 2.028441 | 0 | 0 |
| Cdan1     | 2.446002 | 0 | 0 |
| 9530085L1 | 2.763536 | 0 | 0 |
| Ssx2ip    | 1.711828 | 0 | 0 |
| Kmt2c     | 1.205641 | 0 | 0 |
| Heatr5a   | 1.865368 | 0 | 0 |
| Al480526  | 2.109015 | 0 | 0 |
| Luc7l3    | 1.125362 | 0 | 0 |

|           |          |   |   |
|-----------|----------|---|---|
| Spint2    | 2.055213 | 0 | 0 |
| Tmem201   | 2.129399 | 0 | 0 |
| Ush2a     | 3.211773 | 0 | 0 |
| 5930430LC | 2.236331 | 0 | 0 |
| Hspb6     | 2.411164 | 0 | 0 |
| Hirip3    | 2.170144 | 0 | 0 |
| 4632432E  | 3.405624 | 0 | 0 |
| Zfp787    | 1.845264 | 0 | 0 |
| Mest      | 2.511075 | 0 | 0 |
| Abcg4     | 2.824504 | 0 | 0 |
| 0610009B  | 1.729139 | 0 | 0 |
| Cstf3     | 1.845346 | 0 | 0 |
| Sntg2     | 2.637355 | 0 | 0 |
| Nrip1     | 1.334574 | 0 | 0 |
| Ccnl1     | 1.234254 | 0 | 0 |
| Ahrr      | 3.424561 | 0 | 0 |
| E130218IO | 1.257986 | 0 | 0 |
| Cnot6     | 1.169375 | 0 | 0 |
| Zdhhc6    | 1.707411 | 0 | 0 |
| Atp6v0e2  | 1.578311 | 0 | 0 |
| Eml3      | 1.857828 | 0 | 0 |
| Snta1     | 2.015727 | 0 | 0 |
| Ube4bos1  | 3.64888  | 0 | 0 |
| Tle4      | 1.557572 | 0 | 0 |
| Tmx1      | 1.472481 | 0 | 0 |
| Tmcc1     | 1.446595 | 0 | 0 |
| Armc1     | 1.490869 | 0 | 0 |
| Fance     | 1.956581 | 0 | 0 |
| Slc1a7    | 2.582692 | 0 | 0 |
| Dnmt3a    | 1.615807 | 0 | 0 |
| Ilf2      | 1.497864 | 0 | 0 |
| 2610020C  | 3.200506 | 0 | 0 |
| Immt      | 1.328883 | 0 | 0 |
| Zbtb18    | 1.718875 | 0 | 0 |
| Tmem230   | 1.77729  | 0 | 0 |
| Acin1     | 1.130185 | 0 | 0 |
| Sh3gl2    | 2.00318  | 0 | 0 |
| Golgb1    | 1.24684  | 0 | 0 |
| ENSMUSG   | 1.744651 | 0 | 0 |
| Eif1a     | 1.552258 | 0 | 0 |
| Gm28875   | 2.213568 | 0 | 0 |
| Ubttd1    | 2.173417 | 0 | 0 |
| Prdm8     | 2.421278 | 0 | 0 |
| Gm19409   | 3.489991 | 0 | 0 |
| Cuedc1    | 1.315966 | 0 | 0 |
| Cnnm4     | 2.323229 | 0 | 0 |
| Plcd3     | 2.518525 | 0 | 0 |

|          |          |           |           |
|----------|----------|-----------|-----------|
| Vax2     | 2.597893 | 0         | 0         |
| Gm42515  | 2.801965 | 0         | 0         |
| 6430590A | 2.297358 | 0         | 0         |
| Zfp612   | 2.479874 | 0         | 0         |
| Polr2a   | 1.316924 | 0         | 0         |
| Llg12    | 2.535732 | 0         | 0         |
| Zfp281   | 1.634152 | 0         | 0         |
| Leng8    | 1.324205 | 0         | 0         |
| 4932438A | 1.277806 | 0         | 0         |
| Zfp462   | 1.692853 | 0         | 0         |
| Pgk1     | 1.138603 | 0         | 0         |
| Inka2    | 2.345967 | 0         | 0         |
| Napg     | 1.471623 | 0         | 0         |
| Rnf113a2 | 2.113222 | 0         | 0         |
| Agl      | 1.786457 | 0         | 0         |
| Gtf2ird1 | 1.745064 | 0         | 0         |
| 6530402F | 2.809786 | 0         | 0         |
| Gdpd5    | 1.919768 | 0         | 0         |
| Nipal1   | 3.82721  | 0         | 0         |
| Brsk2    | 2.328702 | 0         | 0         |
| Fam149a  | 2.315202 | 0         | 0         |
| Sfxn2    | 2.737041 | 0         | 0         |
| Tbc1d32  | 2.283082 | 0         | 0         |
| Dnm1     | 1.875668 | 0         | 0         |
| Sarm1    | 3.069155 | 0         | 0         |
| Hmgcr    | 1.865349 | 0         | 0         |
| Pfkp     | 1.249623 | 0         | 0         |
| Lrrc2    | 3.059362 | 0         | 0         |
| Rmdn3    | 2.135626 | 0         | 0         |
| Dync2h1  | 2.088531 | 0         | 0         |
| Syng1    | 1.967158 | 0         | 0         |
| Slc17a1  | 3.0847   | 0.00E+00  | 2.58E-308 |
| Gm48114  | 3.196869 | 0.00E+00  | 5.18E-308 |
| Pias1    | 1.390991 | 0         | 0         |
| Scn8a    | 2.577946 | 9.6574588 | 0.00E+00  |
| Tigd2    | 1.630812 | 0         | 0         |
| Tmem107  | 2.372881 | 0.00E+00  | 0.00E+00  |
| Apc      | 1.170948 | 0         | 0         |
| Akap9    | 1.147416 | 6.2544664 | 0.00E+00  |
| Prpf39   | 1.444077 | 0.00E+00  | 0.00E+00  |
| Zdhhc5   | 1.653902 | 0.00E+00  | 8.74E-308 |
| Snhg20   | 1.547679 | 0.00E+00  | 1.52E-307 |
| Sirt4    | 2.48353  | 1.26E-306 | 1.42E-305 |
| Wwox     | 2.099799 | 1.81E-307 | 2.05E-306 |
| Macrod2  | 2.248541 | 1.33E-306 | 1.50E-305 |
| Emsy     | 1.38297  | 1.13E-307 | 1.29E-306 |
| Ln timer | 1.948264 | 4.04E-307 | 4.57E-306 |

|           |          |           |           |
|-----------|----------|-----------|-----------|
| Slf2      | 1.674451 | 4.86E-307 | 5.49E-306 |
| Syne3     | 2.67553  | 4.04E-305 | 4.54E-304 |
| Bace1     | 1.700833 | 8.80E-307 | 9.95E-306 |
| Lpcat2    | 2.401328 | 1.21E-305 | 1.36E-304 |
| Cc2d2a    | 1.83451  | 1.90E-305 | 2.13E-304 |
| Zkscan2   | 2.556772 | 1.38E-303 | 1.55E-302 |
| Gm15513   | 3.288517 | 1.53E-301 | 1.70E-300 |
| Ccnq      | 1.814122 | 2.18E-304 | 2.44E-303 |
| R3hdm1    | 1.283659 | 2.30E-304 | 2.58E-303 |
| Cpox      | 2.060548 | 1.30E-302 | 1.44E-301 |
| Gpsm1     | 1.842279 | 3.01E-303 | 3.36E-302 |
| Slc25a22  | 2.008889 | 5.94E-303 | 6.62E-302 |
| Nap1l1    | 1.114891 | 4.43E-302 | 4.93E-301 |
| 1190005I0 | 1.924935 | 3.11E-301 | 3.44E-300 |
| Wdr27     | 2.642842 | 2.53E-299 | 2.79E-298 |
| Osbpl8    | 1.535075 | 2.04E-300 | 2.26E-299 |
| Ddx17     | 1.00005  | 7.57E-299 | 8.31E-298 |
| H2bc4     | 1.024935 | 8.47E-299 | 9.29E-298 |
| Rab30     | 2.432636 | 1.18E-297 | 1.29E-296 |
| Ift122    | 2.353953 | 3.94E-297 | 4.30E-296 |
| Faah      | 3.010526 | 1.07E-295 | 1.16E-294 |
| Mbnl1     | 0.97831  | 8.29E-298 | 9.07E-297 |
| Glb1l3    | 2.782699 | 2.90E-296 | 3.15E-295 |
| Dop1a     | 1.40859  | 2.57E-296 | 2.80E-295 |
| Alkbh5    | 1.156948 | 9.54E-296 | 1.04E-294 |
| 5033430I1 | 2.542498 | 7.18E-293 | 7.73E-292 |
| Srsf2     | 0.974603 | 3.91E-294 | 4.22E-293 |
| Gm9918    | 3.015717 | 4.54E-292 | 4.87E-291 |
| Amz2      | 1.646548 | 1.57E-293 | 1.70E-292 |
| Magi2     | 2.185967 | 1.79E-292 | 1.92E-291 |
| Hook3     | 1.04182  | 6.61E-293 | 7.12E-292 |
| Bmpr1a    | 1.519275 | 6.27E-293 | 6.77E-292 |
| Srrm2     | 0.83719  | 1.98E-292 | 2.12E-291 |
| Esco1     | 1.606847 | 1.84E-292 | 1.97E-291 |
| Ano2      | 2.774784 | 4.37E-291 | 4.66E-290 |
| Gzmm      | 2.18202  | 1.73E-291 | 1.85E-290 |
| Elmod2    | 1.82307  | 6.69E-292 | 7.16E-291 |
| Hexdc     | 2.150548 | 1.74E-290 | 1.85E-289 |
| Srsf7     | 1.006126 | 1.72E-290 | 1.83E-289 |
| Zfc3h1    | 1.549894 | 2.24E-290 | 2.38E-289 |
| Mpdz      | 1.42347  | 3.93E-290 | 4.17E-289 |
| Zdhhc17   | 1.561324 | 2.12E-289 | 2.25E-288 |
| Armc9     | 2.606759 | 1.44E-287 | 1.51E-286 |
| Ctr9      | 1.516289 | 7.41E-289 | 7.84E-288 |
| Mtif2     | 1.851707 | 1.91E-288 | 2.01E-287 |
| 5031425E1 | 1.383557 | 7.58E-288 | 7.98E-287 |
| Gm50240   | 1.766358 | 7.28E-287 | 7.65E-286 |



|           |          |           |           |
|-----------|----------|-----------|-----------|
| Gm38162   | 2.809426 | 3.50E-284 | 3.64E-283 |
| Samd8     | 1.380031 | 2.15E-286 | 2.25E-285 |
| Tmem42    | 2.220123 | 2.55E-285 | 2.66E-284 |
| Clasp1    | 1.33713  | 1.82E-285 | 1.91E-284 |
| Enkd1     | 2.606717 | 8.75E-284 | 9.11E-283 |
| Gm16055   | 3.844126 | 1.36E-280 | 1.40E-279 |
| Gm10097   | 3.84674  | 1.51E-280 | 1.55E-279 |
| Brd8      | 1.242758 | 2.74E-284 | 2.86E-283 |
| Las1l     | 1.53412  | 5.51E-284 | 5.74E-283 |
| Sgcg      | 2.967693 | 3.50E-281 | 3.61E-280 |
| Nedd4l    | 1.772671 | 6.59E-283 | 6.86E-282 |
| Cpsf6     | 1.24146  | 9.61E-282 | 9.94E-281 |
| Ttll11    | 2.839655 | 7.49E-280 | 7.70E-279 |
| Gm44196   | 3.565098 | 3.20E-277 | 3.26E-276 |
| Zscan29   | 2.249827 | 8.44E-279 | 8.64E-278 |
| Gm9752    | 3.591019 | 2.60E-276 | 2.63E-275 |
| Pias3     | 1.729889 | 6.83E-279 | 7.00E-278 |
| Ift74     | 1.902133 | 1.54E-278 | 1.58E-277 |
| Ap3b2     | 2.3421   | 3.03E-278 | 3.09E-277 |
| Tpd52     | 0.93677  | 4.23E-278 | 4.32E-277 |
| Ift80     | 2.116557 | 3.72E-277 | 3.80E-276 |
| Fam184a   | 2.321374 | 1.18E-276 | 1.20E-275 |
| Atp11a    | 1.392144 | 4.73E-277 | 4.82E-276 |
| Phyhipl   | 2.064249 | 1.08E-276 | 1.10E-275 |
| Pstk      | 1.789608 | 1.94E-275 | 1.96E-274 |
| Desi2     | 1.432572 | 3.39E-275 | 3.43E-274 |
| Dpy30     | 1.293445 | 9.08E-275 | 9.18E-274 |
| A930041C  | 2.850462 | 5.19E-273 | 5.21E-272 |
| Chsy1     | 2.049761 | 8.52E-274 | 8.58E-273 |
| Timm44    | 1.646276 | 3.18E-274 | 3.21E-273 |
| Tigar     | 2.347554 | 3.30E-273 | 3.32E-272 |
| Tbc1d8    | 2.035513 | 6.20E-274 | 6.25E-273 |
| Stxbp5l   | 3.17604  | 1.69E-271 | 1.69E-270 |
| Gm49883   | 2.630373 | 1.83E-272 | 1.83E-271 |
| Tia1      | 1.223543 | 6.65E-274 | 6.70E-273 |
| Prkab1    | 1.752045 | 1.10E-271 | 1.10E-270 |
| 1110002LC | 2.319516 | 4.99E-271 | 4.96E-270 |
| Tex9      | 2.469401 | 2.57E-270 | 2.55E-269 |
| Mast2     | 1.719627 | 3.15E-271 | 3.14E-270 |
| Sncb      | 1.511123 | 3.03E-271 | 3.01E-270 |
| Flcn      | 1.904965 | 7.89E-271 | 7.84E-270 |
| Wasf3     | 1.334379 | 4.92E-270 | 4.87E-269 |
| Gdpd1     | 1.994707 | 5.68E-269 | 5.60E-268 |
| Mtftp1    | 2.493147 | 1.48E-267 | 1.46E-266 |
| Fbxl12    | 1.878016 | 6.09E-268 | 5.99E-267 |
| Gbf1      | 1.365295 | 1.93E-268 | 1.90E-267 |
| Fam227a   | 2.862662 | 3.87E-266 | 3.78E-265 |

|           |          |           |           |
|-----------|----------|-----------|-----------|
| Pcf11     | 1.241759 | 4.09E-268 | 4.02E-267 |
| Gjd2      | 2.381203 | 5.32E-266 | 5.19E-265 |
| Ufsp2     | 1.58295  | 4.55E-266 | 4.45E-265 |
| Dync1li1  | 1.3826   | 4.83E-266 | 4.72E-265 |
| Rnpc3     | 1.575721 | 9.01E-266 | 8.79E-265 |
| Lsm14a    | 1.151932 | 2.40E-265 | 2.34E-264 |
| Phax      | 1.291976 | 3.46E-265 | 3.36E-264 |
| Clip4     | 2.015734 | 8.05E-265 | 7.83E-264 |
| Lpin2     | 1.671765 | 2.99E-264 | 2.90E-263 |
| Kif3b     | 1.673098 | 3.36E-264 | 3.25E-263 |
| Kras      | 1.049205 | 3.21E-264 | 3.11E-263 |
| Dnah7b    | 2.838193 | 9.11E-263 | 8.78E-262 |
| Igsf11    | 2.236356 | 2.68E-263 | 2.59E-262 |
| Adal      | 2.321634 | 1.99E-262 | 1.92E-261 |
| Gm43009   | 2.779179 | 1.08E-259 | 1.03E-258 |
| Ncapd3    | 1.906281 | 2.67E-260 | 2.55E-259 |
| Plekha6   | 2.554671 | 1.26E-259 | 1.20E-258 |
| Pde6h     | 2.10049  | 5.58E-259 | 5.31E-258 |
| Snx10     | 1.315997 | 2.20E-260 | 2.11E-259 |
| Ppp2r5c   | 1.081802 | 3.17E-260 | 3.03E-259 |
| Jrkl      | 2.094183 | 3.25E-259 | 3.09E-258 |
| Nrm       | 2.062143 | 1.42E-259 | 1.36E-258 |
| Clstn1    | 0.934265 | 4.46E-260 | 4.26E-259 |
| Mtfr1     | 1.674748 | 1.03E-259 | 9.83E-259 |
| Mdh1      | 1.014689 | 1.74E-259 | 1.66E-258 |
| A930004J1 | 1.890989 | 1.36E-258 | 1.29E-257 |
| Epc1      | 1.329245 | 3.73E-259 | 3.55E-258 |
| Rasgef1b  | 2.739976 | 1.53E-257 | 1.45E-256 |
| Lhfpl4    | 2.541527 | 1.22E-257 | 1.15E-256 |
| 1110051N  | 2.040166 | 9.09E-258 | 8.59E-257 |
| 1110018N  | 2.96384  | 2.70E-256 | 2.53E-255 |
| 1700029JC | 2.823018 | 6.63E-256 | 6.22E-255 |
| Ppp1cc    | 1.331589 | 7.71E-258 | 7.30E-257 |
| Odc1      | 1.708355 | 3.28E-257 | 3.08E-256 |
| Usp12     | 1.555817 | 2.81E-257 | 2.65E-256 |
| Dusp14    | 2.779501 | 4.22E-255 | 3.95E-254 |
| 9330159N  | 3.016486 | 5.67E-254 | 5.28E-253 |
| Gm21846   | 3.710969 | 3.47E-252 | 3.20E-251 |
| Gse1      | 1.401801 | 1.63E-254 | 1.52E-253 |
| Cfap97    | 1.582057 | 5.16E-254 | 4.81E-253 |
| Lym9      | 2.135786 | 4.38E-253 | 4.07E-252 |
| Arfgef1   | 1.173116 | 1.26E-253 | 1.17E-252 |
| Ppp3r1    | 1.318435 | 6.22E-253 | 5.77E-252 |
| Kdm3b     | 1.595962 | 1.06E-252 | 9.79E-252 |
| Tmem106   | 1.603695 | 2.11E-252 | 1.95E-251 |
| Atp2c1    | 1.107233 | 2.17E-251 | 2.00E-250 |
| Map9      | 2.350651 | 1.81E-250 | 1.66E-249 |

|          |          |           |           |
|----------|----------|-----------|-----------|
| Magef1   | 1.982632 | 1.63E-250 | 1.50E-249 |
| Mapre2   | 1.333275 | 5.34E-251 | 4.90E-250 |
| Tmem167  | 1.182096 | 2.40E-250 | 2.20E-249 |
| Ccdc113  | 3.19542  | 3.03E-248 | 2.76E-247 |
| Apela    | 3.171225 | 7.47E-248 | 6.80E-247 |
| Xkr6     | 2.691585 | 3.46E-248 | 3.15E-247 |
| Usp34    | 0.977405 | 1.23E-249 | 1.12E-248 |
| Cyth2    | 1.392767 | 1.62E-249 | 1.49E-248 |
| Atp6v1b2 | 1.341086 | 1.92E-249 | 1.76E-248 |
| Ro60     | 1.015038 | 2.60E-249 | 2.38E-248 |
| Fam160a1 | 2.426742 | 1.74E-248 | 1.59E-247 |
| Crtc3    | 1.255092 | 9.82E-249 | 8.97E-248 |
| Slc12a6  | 1.32694  | 6.81E-247 | 6.17E-246 |
| Amph     | 1.915589 | 2.76E-246 | 2.49E-245 |
| Gadd45a  | 1.91309  | 2.42E-245 | 2.18E-244 |
| Ccar1    | 1.110936 | 5.03E-245 | 4.52E-244 |
| Kif2a    | 1.253347 | 1.34E-244 | 1.21E-243 |
| Msh3     | 1.908487 | 5.26E-244 | 4.70E-243 |
| Phf14    | 1.14172  | 4.61E-244 | 4.12E-243 |
| Kmt2d    | 1.303533 | 2.82E-243 | 2.52E-242 |
| Arg2     | 3.082193 | 1.71E-241 | 1.52E-240 |
| Pex11a   | 2.262971 | 2.80E-242 | 2.50E-241 |
| Thoc2l   | 1.174485 | 6.64E-242 | 5.90E-241 |
| Gm15872  | 3.169138 | 4.69E-240 | 4.14E-239 |
| Zfp871   | 1.141906 | 8.64E-242 | 7.67E-241 |
| Ccdc66   | 1.693848 | 1.79E-241 | 1.59E-240 |
| Ccnt1    | 1.224696 | 2.31E-241 | 2.05E-240 |
| Ormdl3   | 1.300161 | 4.48E-241 | 3.96E-240 |
| Bbs2     | 2.015352 | 1.36E-240 | 1.20E-239 |
| 2810013P | 1.380989 | 6.62E-240 | 5.84E-239 |
| Marveld3 | 3.575181 | 1.95E-237 | 1.70E-236 |
| Spata7   | 1.902699 | 4.62E-239 | 4.07E-238 |
| Mapk8    | 1.48961  | 4.56E-239 | 4.01E-238 |
| Ptges2   | 2.054052 | 1.55E-238 | 1.36E-237 |
| Prdm9    | 2.724295 | 2.05E-237 | 1.79E-236 |
| Sap30    | 1.947151 | 2.99E-238 | 2.62E-237 |
| Smc5     | 1.401277 | 1.72E-238 | 1.51E-237 |
| Trim17   | 2.885366 | 1.28E-236 | 1.11E-235 |
| Nipbl    | 0.89594  | 8.93E-238 | 7.83E-237 |
| Synrg    | 1.225994 | 1.22E-237 | 1.07E-236 |
| Tmem35a  | 2.699839 | 2.91E-236 | 2.53E-235 |
| Thoc2    | 1.002528 | 4.18E-237 | 3.65E-236 |
| Gigyf2   | 1.260033 | 8.33E-237 | 7.26E-236 |
| Cfap36   | 1.303309 | 1.92E-236 | 1.67E-235 |
| Mex3b    | 2.219012 | 8.02E-236 | 6.96E-235 |
| Ndufaf4  | 1.516916 | 2.44E-236 | 2.12E-235 |
| Gcc2     | 1.267337 | 2.26E-236 | 1.96E-235 |

|           |          |           |           |
|-----------|----------|-----------|-----------|
| ENSMUSG   | 2.829338 | 1.50E-234 | 1.29E-233 |
| Eif2s3y   | 1.310362 | 1.28E-235 | 1.11E-234 |
| Hltf      | 1.555583 | 1.65E-235 | 1.43E-234 |
| Gm49602   | 1.988463 | 1.87E-234 | 1.62E-233 |
| Gm37443   | 3.919731 | 1.25E-231 | 1.06E-230 |
| Arhgap10  | 1.62495  | 5.39E-234 | 4.64E-233 |
| Itsn2     | 1.043566 | 1.43E-233 | 1.23E-232 |
| Adamts3   | 3.689063 | 4.27E-231 | 3.62E-230 |
| Fam229b   | 2.402648 | 1.27E-232 | 1.09E-231 |
| Lekr1     | 2.680784 | 1.60E-231 | 1.36E-230 |
| Fnip1     | 1.474088 | 2.26E-232 | 1.94E-231 |
| Erc2      | 3.056397 | 7.79E-231 | 6.60E-230 |
| Oaz1      | 0.65994  | 6.73E-232 | 5.74E-231 |
| Dnajc28   | 2.619463 | 2.65E-231 | 2.26E-230 |
| B4galt1   | 1.581098 | 4.25E-232 | 3.63E-231 |
| Zfp472    | 2.215684 | 2.09E-231 | 1.77E-230 |
| Plekhn3   | 1.80638  | 7.09E-232 | 6.05E-231 |
| Cep120    | 1.502894 | 1.65E-231 | 1.40E-230 |
| Dusp8     | 1.433744 | 2.35E-231 | 1.99E-230 |
| Prmt7     | 1.975763 | 7.15E-231 | 6.05E-230 |
| Hdc       | 3.083015 | 4.87E-229 | 4.09E-228 |
| Gbp1      | 1.088065 | 1.47E-230 | 1.25E-229 |
| Akap1     | 1.788621 | 8.04E-230 | 6.78E-229 |
| Camk2g    | 1.494685 | 5.91E-230 | 4.99E-229 |
| Ago3      | 1.455683 | 6.89E-230 | 5.81E-229 |
| Bex2      | 1.681764 | 1.23E-229 | 1.04E-228 |
| Kcnc3     | 2.651323 | 1.30E-228 | 1.10E-227 |
| Bbof1     | 3.2034   | 1.58E-227 | 1.32E-226 |
| Raph1     | 1.235446 | 2.25E-229 | 1.90E-228 |
| Egflam    | 1.476595 | 3.95E-229 | 3.33E-228 |
| Zfp81     | 2.015816 | 2.10E-228 | 1.76E-227 |
| Sec14l2   | 2.699965 | 6.15E-228 | 5.14E-227 |
| Gm37941   | 3.243382 | 7.06E-227 | 5.88E-226 |
| Zfp292    | 1.0382   | 1.44E-228 | 1.21E-227 |
| Azi2      | 1.251512 | 1.37E-228 | 1.15E-227 |
| Nufip2    | 1.122121 | 1.75E-228 | 1.47E-227 |
| 6820431F2 | 0.957219 | 1.66E-227 | 1.38E-226 |
| Kifap3    | 1.281368 | 1.65E-227 | 1.38E-226 |
| Me2       | 2.094339 | 8.48E-227 | 7.06E-226 |
| Ap1b1     | 1.606982 | 1.49E-225 | 1.24E-224 |
| Map3k12   | 1.874642 | 6.81E-225 | 5.63E-224 |
| Sec22b    | 1.260507 | 2.59E-225 | 2.15E-224 |
| A430105J0 | 3.185915 | 4.89E-223 | 4.01E-222 |
| Gm10419   | 2.843415 | 1.53E-223 | 1.25E-222 |
| Brwd1     | 1.23461  | 6.71E-225 | 5.55E-224 |
| Kank1     | 1.577534 | 1.94E-224 | 1.60E-223 |
| Mgat1     | 1.392935 | 2.13E-224 | 1.76E-223 |

|           |          |           |           |
|-----------|----------|-----------|-----------|
| Acvr2b    | 1.812241 | 6.24E-224 | 5.13E-223 |
| Fam78b    | 2.461384 | 2.90E-223 | 2.38E-222 |
| BC005537  | 0.944014 | 8.75E-224 | 7.18E-223 |
| B230369F  | 2.86056  | 2.16E-222 | 1.76E-221 |
| Rtn1      | 1.538046 | 3.28E-223 | 2.68E-222 |
| Scand1    | 1.078072 | 1.47E-222 | 1.20E-221 |
| Fam107b   | 1.798722 | 6.87E-222 | 5.60E-221 |
| Pcbp3     | 1.404249 | 7.00E-221 | 5.69E-220 |
| Ddx55     | 1.753394 | 1.70E-220 | 1.38E-219 |
| Scarb1    | 1.06456  | 1.04E-220 | 8.49E-220 |
| Ssbp4     | 0.993493 | 1.37E-220 | 1.11E-219 |
| Srek1     | 1.130012 | 3.89E-220 | 3.16E-219 |
| Gm48505   | 3.524862 | 5.18E-217 | 4.17E-216 |
| Mtdh      | 0.872505 | 4.76E-219 | 3.86E-218 |
| Camkk2    | 1.719152 | 9.44E-219 | 7.64E-218 |
| Ncoa1     | 1.082541 | 7.71E-219 | 6.25E-218 |
| Ctxn1     | 2.844116 | 2.16E-217 | 1.75E-216 |
| Tmem170l  | 1.658305 | 7.47E-218 | 6.03E-217 |
| Commd1    | 1.068805 | 7.48E-218 | 6.04E-217 |
| Get4      | 1.444209 | 8.46E-217 | 6.81E-216 |
| Gm14769   | 3.831403 | 1.73E-214 | 1.38E-213 |
| Cep350    | 1.16639  | 8.54E-217 | 6.87E-216 |
| Tapt1     | 1.543211 | 1.12E-216 | 8.99E-216 |
| Kdm5c     | 1.544041 | 2.58E-216 | 2.07E-215 |
| Rnf123    | 1.705377 | 1.84E-215 | 1.48E-214 |
| Gm9895    | 3.170704 | 1.99E-213 | 1.58E-212 |
| Zfp322a   | 1.429039 | 4.77E-215 | 3.82E-214 |
| Dhx36     | 1.043455 | 5.95E-215 | 4.76E-214 |
| Yod1      | 1.65904  | 9.57E-215 | 7.65E-214 |
| R3hdm4    | 1.348229 | 8.58E-215 | 6.87E-214 |
| Acaca     | 1.78364  | 3.22E-214 | 2.57E-213 |
| Tmem9     | 1.562687 | 5.94E-214 | 4.73E-213 |
| Vps37c    | 1.875724 | 1.66E-213 | 1.32E-212 |
| Tra2b     | 0.927464 | 1.19E-213 | 9.49E-213 |
| Tardbp    | 1.01671  | 1.34E-213 | 1.07E-212 |
| Raly      | 0.923748 | 1.43E-213 | 1.14E-212 |
| Arhgap32  | 1.370877 | 1.65E-213 | 1.31E-212 |
| Gm47283   | 1.347448 | 2.01E-213 | 1.60E-212 |
| Pex2      | 1.526087 | 2.23E-213 | 1.77E-212 |
| Gtpbp2    | 1.376803 | 7.90E-213 | 6.26E-212 |
| Hnrnp1    | 0.949254 | 1.13E-212 | 8.97E-212 |
| Rsl1d1    | 1.209245 | 3.81E-212 | 3.01E-211 |
| Plppr4    | 2.168011 | 1.71E-211 | 1.35E-210 |
| Rangap1   | 1.425697 | 2.21E-211 | 1.74E-210 |
| Sephs2    | 1.904896 | 6.29E-211 | 4.95E-210 |
| D630045J1 | 2.6779   | 2.62E-210 | 2.05E-209 |
| Nsun4     | 2.053413 | 1.09E-210 | 8.55E-210 |

|          |          |           |           |
|----------|----------|-----------|-----------|
| Tctn2    | 2.545126 | 3.84E-210 | 3.00E-209 |
| Pla2g5   | 1.407421 | 7.16E-211 | 5.64E-210 |
| Btrc     | 1.591567 | 1.20E-210 | 9.38E-210 |
| A930005G | 1.618443 | 1.14E-210 | 8.96E-210 |
| Btbd10   | 1.61825  | 2.79E-210 | 2.18E-209 |
| AW54987  | 1.407001 | 2.65E-210 | 2.07E-209 |
| 2300009A | 1.269885 | 2.89E-210 | 2.26E-209 |
| Ptpn21   | 1.549627 | 5.63E-210 | 4.39E-209 |
| Opn1sw   | 1.723932 | 5.46E-209 | 4.24E-208 |
| P4htm    | 1.94432  | 1.50E-209 | 1.17E-208 |
| Med13    | 1.051336 | 9.51E-210 | 7.41E-209 |
| Asrgl1   | 1.367345 | 3.45E-209 | 2.68E-208 |
| Anapc16  | 1.036454 | 1.85E-208 | 1.44E-207 |
| Got2     | 1.295195 | 2.11E-208 | 1.64E-207 |
| Lrif1    | 1.382293 | 2.82E-208 | 2.18E-207 |
| Cdkl3    | 2.207679 | 4.17E-207 | 3.22E-206 |
| Prkar2a  | 1.077706 | 1.25E-207 | 9.69E-207 |
| Gfpt1    | 1.391184 | 2.13E-207 | 1.65E-206 |
| Exoc3    | 1.194737 | 2.56E-207 | 1.98E-206 |
| Camkk1   | 2.711528 | 1.40E-205 | 1.08E-204 |
| Fryl     | 0.802323 | 1.93E-206 | 1.49E-205 |
| Ubxn4    | 0.947965 | 1.74E-206 | 1.34E-205 |
| Plekha7  | 2.244315 | 6.58E-206 | 5.05E-205 |
| Capn7    | 1.576056 | 9.09E-206 | 6.98E-205 |
| Gm8184   | 3.81043  | 1.03E-203 | 7.84E-203 |
| Map4k3   | 1.177416 | 1.43E-205 | 1.09E-204 |
| Rhbdd3   | 2.271398 | 2.36E-203 | 1.79E-202 |
| Phf21b   | 2.251239 | 1.72E-203 | 1.31E-202 |
| N4bp2l2  | 0.952306 | 7.73E-204 | 5.90E-203 |
| Ash1l    | 0.812331 | 1.08E-203 | 8.19E-203 |
| Btc      | 3.077546 | 3.50E-202 | 2.66E-201 |
| Cnot7    | 1.305873 | 4.90E-203 | 3.73E-202 |
| Clba1    | 2.493663 | 2.50E-202 | 1.90E-201 |
| Epm2aip1 | 1.278059 | 6.49E-203 | 4.93E-202 |
| Zfp207   | 0.998078 | 6.94E-203 | 5.28E-202 |
| Ric1     | 1.409456 | 1.38E-202 | 1.05E-201 |
| Galnt4   | 2.042343 | 4.07E-202 | 3.08E-201 |
| Mreg     | 3.060757 | 4.39E-201 | 3.30E-200 |
| Gmcl1    | 1.742886 | 7.29E-202 | 5.52E-201 |
| Tmem218  | 1.645658 | 8.02E-202 | 6.06E-201 |
| Tmtc3    | 1.651528 | 1.41E-201 | 1.06E-200 |
| Enah     | 1.17783  | 1.30E-201 | 9.86E-201 |
| Ss18l2   | 1.26261  | 2.65E-201 | 2.00E-200 |
| Lmln     | 2.538691 | 1.69E-200 | 1.27E-199 |
| Slc38a3  | 0.994298 | 3.91E-201 | 2.94E-200 |
| Plekha2  | 1.225673 | 5.36E-201 | 4.03E-200 |
| Gm42946  | 2.903158 | 9.78E-200 | 7.29E-199 |

|           |          |           |           |
|-----------|----------|-----------|-----------|
| Srrm1     | 0.811497 | 1.68E-200 | 1.26E-199 |
| Helz      | 1.073448 | 1.80E-200 | 1.34E-199 |
| Mrpl49    | 1.520522 | 3.27E-200 | 2.44E-199 |
| 8030462N  | 1.316596 | 3.42E-200 | 2.56E-199 |
| Arntl     | 1.550567 | 4.50E-200 | 3.36E-199 |
| Zswim6    | 1.484473 | 7.48E-200 | 5.58E-199 |
| Grm8      | 3.478865 | 9.50E-198 | 7.01E-197 |
| 9330020H  | 2.121156 | 5.00E-199 | 3.72E-198 |
| Wdr35     | 2.220896 | 1.30E-198 | 9.65E-198 |
| Dnajc6    | 2.331229 | 2.41E-198 | 1.79E-197 |
| Plekha2   | 1.524087 | 2.17E-198 | 1.61E-197 |
| Kpna3     | 1.486029 | 2.46E-198 | 1.82E-197 |
| 6430571L1 | 2.902101 | 3.32E-197 | 2.44E-196 |
| Mcts2     | 2.073791 | 7.65E-198 | 5.65E-197 |
| BC034090  | 2.025865 | 4.73E-198 | 3.50E-197 |
| Zfp955b   | 1.651163 | 5.10E-198 | 3.77E-197 |
| Dot1l     | 1.483527 | 9.65E-198 | 7.12E-197 |
| Gripap1   | 1.327635 | 8.90E-198 | 6.57E-197 |
| Add1      | 0.96742  | 2.11E-197 | 1.56E-196 |
| Gm49153   | 2.973169 | 6.67E-196 | 4.88E-195 |
| Ncbp3     | 1.39046  | 7.31E-197 | 5.36E-196 |
| U2surp    | 0.919278 | 2.24E-196 | 1.64E-195 |
| Hook2     | 2.342957 | 8.95E-195 | 6.53E-194 |
| Arrdc3    | 1.632111 | 1.34E-194 | 9.77E-194 |
| Trappc9   | 1.589773 | 2.47E-194 | 1.80E-193 |
| Hps3      | 1.650407 | 1.00E-193 | 7.30E-193 |
| Terf1     | 1.423302 | 3.07E-193 | 2.23E-192 |
| Cdc7      | 2.409984 | 2.34E-192 | 1.69E-191 |
| Gm5466    | 3.878638 | 5.80E-191 | 4.17E-190 |
| Ranbp6    | 1.75554  | 1.45E-192 | 1.05E-191 |
| Spg7      | 1.401859 | 3.84E-192 | 2.78E-191 |
| 5830408C  | 2.254458 | 1.66E-191 | 1.19E-190 |
| Asxl2     | 1.217208 | 4.76E-192 | 3.44E-191 |
| Ewsr1     | 0.924167 | 8.00E-192 | 5.78E-191 |
| Mtmr1     | 1.598767 | 8.70E-192 | 6.28E-191 |
| Nol11     | 1.421828 | 1.37E-191 | 9.85E-191 |
| Scft1     | 1.586934 | 1.71E-191 | 1.23E-190 |
| Mrpl54    | 1.245889 | 9.80E-191 | 7.04E-190 |
| Pmm1      | 1.081798 | 1.97E-190 | 1.42E-189 |
| Bbs12     | 2.634879 | 1.02E-189 | 7.33E-189 |
| Gm43283   | 3.526376 | 6.32E-189 | 4.51E-188 |
| Slx1b     | 1.658781 | 3.80E-190 | 2.73E-189 |
| Doc2b     | 2.369056 | 8.10E-190 | 5.81E-189 |
| Gpx4      | 0.691301 | 1.25E-189 | 8.97E-189 |
| Col19a1   | 3.679984 | 5.74E-188 | 4.09E-187 |
| Stard10   | 1.358837 | 2.94E-189 | 2.10E-188 |
| Fam89a    | 2.795205 | 2.96E-188 | 2.11E-187 |

|           |          |           |           |
|-----------|----------|-----------|-----------|
| Prpf4b    | 0.843647 | 7.89E-189 | 5.63E-188 |
| Ccser1    | 2.562278 | 5.99E-188 | 4.26E-187 |
| Gnb3      | 1.508989 | 2.40E-188 | 1.71E-187 |
| Sez6l2    | 2.406599 | 1.64E-187 | 1.17E-186 |
| Rhbdd2    | 1.615847 | 8.03E-188 | 5.70E-187 |
| Gnat2     | 2.200442 | 8.85E-187 | 6.26E-186 |
| 9930017N  | 1.918355 | 2.88E-187 | 2.04E-186 |
| Akap11    | 1.018644 | 5.01E-187 | 3.55E-186 |
| Ntn3      | 2.693321 | 3.78E-186 | 2.66E-185 |
| Gm26954   | 3.525896 | 2.36E-185 | 1.65E-184 |
| Gm14296   | 1.983398 | 2.37E-186 | 1.67E-185 |
| Pank4     | 1.960095 | 2.82E-186 | 1.99E-185 |
| Braf      | 1.153877 | 1.69E-186 | 1.20E-185 |
| Gm45441   | 3.190972 | 5.41E-185 | 3.78E-184 |
| Pbx1      | 0.964449 | 7.12E-186 | 5.01E-185 |
| Gdap1     | 2.368879 | 3.40E-185 | 2.38E-184 |
| Trps1     | 1.344136 | 2.05E-185 | 1.44E-184 |
| Cpeb3     | 1.744806 | 4.61E-185 | 3.23E-184 |
| Gtf2f2    | 1.73659  | 1.38E-184 | 9.65E-184 |
| Gm43637   | 3.337467 | 2.83E-183 | 1.96E-182 |
| Nae1      | 1.152913 | 1.30E-184 | 9.06E-184 |
| Tsg101    | 1.086263 | 1.68E-184 | 1.17E-183 |
| Zbtb6     | 1.681376 | 2.95E-184 | 2.05E-183 |
| A730020Ei | 3.04312  | 7.99E-183 | 5.54E-182 |
| Hnrnpr    | 0.850839 | 1.09E-183 | 7.60E-183 |
| 2610028D  | 3.480383 | 3.58E-182 | 2.47E-181 |
| Tnrc6c    | 0.894899 | 2.70E-183 | 1.87E-182 |
| Rnf11     | 0.948364 | 2.86E-183 | 1.99E-182 |
| Gm13830   | 3.331821 | 5.44E-182 | 3.75E-181 |
| Tdrkh     | 2.007904 | 5.85E-183 | 4.06E-182 |
| Micu3     | 1.436622 | 6.46E-183 | 4.48E-182 |
| Gchfr     | 2.781042 | 6.33E-182 | 4.37E-181 |
| Kdsr      | 1.296642 | 1.82E-182 | 1.26E-181 |
| Zzz3      | 1.089279 | 2.07E-182 | 1.44E-181 |
| Rnf170    | 1.578358 | 3.46E-182 | 2.39E-181 |
| Mpp7      | 1.512124 | 4.20E-182 | 2.90E-181 |
| Usp10     | 1.442032 | 4.26E-182 | 2.94E-181 |
| Vbp1      | 1.042181 | 8.87E-182 | 6.11E-181 |
| Usp6nl    | 1.285016 | 2.24E-181 | 1.54E-180 |
| Cdc37l1   | 0.93242  | 8.25E-181 | 5.67E-180 |
| Farsa     | 1.517239 | 1.12E-180 | 7.66E-180 |
| Senp2     | 1.271095 | 1.31E-180 | 8.96E-180 |
| Yaf2      | 1.061081 | 2.20E-180 | 1.51E-179 |
| Ormdl1    | 1.738599 | 5.13E-180 | 3.52E-179 |
| Ncl       | 0.698308 | 6.41E-180 | 4.39E-179 |
| BB218582  | 2.393449 | 4.08E-179 | 2.79E-178 |
| Pard6b    | 2.862742 | 3.41E-178 | 2.32E-177 |



|          |          |           |           |
|----------|----------|-----------|-----------|
| Ext1     | 1.790231 | 9.60E-179 | 6.56E-178 |
| Cdkn2c   | 1.647862 | 1.14E-178 | 7.82E-178 |
| Tmem145  | 2.285058 | 2.25E-178 | 1.53E-177 |
| Arr3     | 1.919463 | 5.11E-178 | 3.48E-177 |
| Gm45200  | 3.261853 | 1.80E-176 | 1.21E-175 |
| Lmo1     | 1.789752 | 2.77E-177 | 1.88E-176 |
| Arxes1   | 2.348    | 3.78E-177 | 2.56E-176 |
| 5830448L | 2.658562 | 1.47E-176 | 9.93E-176 |
| Dhh      | 2.829829 | 2.27E-176 | 1.53E-175 |
| Map10    | 2.414923 | 5.95E-177 | 4.02E-176 |
| Atp5b    | 0.638553 | 5.27E-177 | 3.57E-176 |
| H2ax     | 1.782022 | 4.98E-176 | 3.36E-175 |
| Zfand6   | 0.852005 | 5.80E-176 | 3.90E-175 |
| Gm2011   | 2.259106 | 1.79E-175 | 1.20E-174 |
| Dnajc12  | 1.434841 | 6.05E-176 | 4.07E-175 |
| Emc7     | 0.844582 | 6.92E-176 | 4.65E-175 |
| Zfp800   | 1.242859 | 6.85E-176 | 4.60E-175 |
| Cdk8     | 1.428049 | 3.83E-175 | 2.57E-174 |
| 1700096K | 1.973289 | 7.75E-175 | 5.19E-174 |
| Rbm39    | 0.601638 | 1.43E-174 | 9.55E-174 |
| Fem1c    | 1.302237 | 9.78E-175 | 6.55E-174 |
| Ncoa2    | 1.255688 | 1.18E-174 | 7.89E-174 |
| Ccdc115  | 1.386241 | 1.56E-174 | 1.04E-173 |
| Lrpprc   | 1.652047 | 2.86E-174 | 1.91E-173 |
| Cyb5r1   | 1.293632 | 4.67E-174 | 3.11E-173 |
| Gm37811  | 3.465334 | 1.43E-172 | 9.47E-172 |
| Synj2bp  | 1.026489 | 9.03E-174 | 6.02E-173 |
| Tbc1d30  | 2.129875 | 1.90E-173 | 1.26E-172 |
| BC025920 | 2.852586 | 9.65E-173 | 6.39E-172 |
| Rab3a    | 1.126358 | 2.74E-173 | 1.82E-172 |
| Rnf6     | 1.066185 | 3.11E-173 | 2.07E-172 |
| Kmt5a    | 1.347075 | 3.44E-173 | 2.29E-172 |
| Zrsr1    | 1.358315 | 7.38E-173 | 4.90E-172 |
| Slc4a8   | 1.723057 | 6.52E-173 | 4.33E-172 |
| Slf1     | 1.626475 | 6.84E-173 | 4.54E-172 |
| Cep43    | 1.931383 | 9.96E-173 | 6.60E-172 |
| Ddx1     | 1.194946 | 7.83E-173 | 5.19E-172 |
| Opn1mw   | 1.982739 | 4.16E-172 | 2.75E-171 |
| Ptprn    | 2.33939  | 2.06E-172 | 1.37E-171 |
| Pde8b    | 1.17972  | 1.93E-172 | 1.27E-171 |
| Rnf227   | 1.732675 | 4.14E-172 | 2.73E-171 |
| Alms1    | 1.935679 | 9.06E-172 | 5.98E-171 |
| Sft2d3   | 1.363752 | 1.28E-171 | 8.45E-171 |
| Fndc1    | 2.317157 | 3.11E-171 | 2.05E-170 |
| Zfp398   | 1.350515 | 1.40E-171 | 9.24E-171 |
| Pacrg    | 3.045039 | 3.27E-170 | 2.15E-169 |
| Glt28d2  | 2.551812 | 2.08E-170 | 1.37E-169 |

|            |          |           |           |
|------------|----------|-----------|-----------|
| Chgb       | 1.607584 | 1.22E-170 | 8.03E-170 |
| Saxo2      | 2.439963 | 2.29E-170 | 1.51E-169 |
| Rbm5       | 0.849148 | 1.26E-170 | 8.31E-170 |
| Ttll3      | 2.508136 | 5.45E-170 | 3.57E-169 |
| AU041133   | 2.122381 | 3.83E-170 | 2.51E-169 |
| Slc29a2    | 2.670706 | 6.77E-170 | 4.43E-169 |
| Erlec1     | 1.220649 | 2.35E-170 | 1.54E-169 |
| Sgtb       | 1.850593 | 3.28E-170 | 2.15E-169 |
| Sdhaf1     | 1.183742 | 9.45E-170 | 6.17E-169 |
| Ptpn2      | 1.52612  | 4.98E-169 | 3.24E-168 |
| Stam2      | 1.365553 | 5.24E-169 | 3.41E-168 |
| Tex261     | 1.024204 | 5.80E-169 | 3.77E-168 |
| Scaf11     | 0.838889 | 7.63E-169 | 4.96E-168 |
| Jchain     | 3.160001 | 6.62E-168 | 4.29E-167 |
| Sbno1      | 0.910863 | 1.93E-168 | 1.25E-167 |
| Pdhb       | 1.137806 | 1.92E-168 | 1.24E-167 |
| Fbxo9      | 1.091121 | 2.05E-168 | 1.33E-167 |
| Gm17057    | 3.397834 | 1.16E-166 | 7.46E-166 |
| Snhg6      | 1.441453 | 2.74E-167 | 1.77E-166 |
| Shroom3    | 2.365994 | 6.92E-167 | 4.47E-166 |
| Ddb1       | 0.925505 | 3.02E-167 | 1.96E-166 |
| ldh1       | 1.261237 | 3.04E-167 | 1.96E-166 |
| Ppp2r5e    | 1.109411 | 8.26E-167 | 5.34E-166 |
| Zfp770     | 1.670177 | 1.90E-166 | 1.22E-165 |
| Bdh1       | 2.745088 | 5.77E-166 | 3.71E-165 |
| Cerk       | 1.358481 | 1.99E-166 | 1.28E-165 |
| Wdcp       | 1.733387 | 3.17E-166 | 2.04E-165 |
| Gm5165     | 2.122679 | 5.22E-166 | 3.36E-165 |
| Lrrc1      | 1.862111 | 3.34E-166 | 2.15E-165 |
| Akap17b    | 2.059205 | 9.58E-166 | 6.14E-165 |
| Arxes2     | 1.983095 | 1.05E-165 | 6.71E-165 |
| Cpsf7      | 1.189253 | 7.21E-166 | 4.63E-165 |
| Zmym5      | 0.984112 | 7.69E-166 | 4.93E-165 |
| Gtf2a1     | 1.199125 | 7.99E-166 | 5.12E-165 |
| Necap1     | 1.387736 | 2.36E-165 | 1.51E-164 |
| Ndufaf5    | 1.959502 | 3.73E-165 | 2.38E-164 |
| Rif1       | 1.009105 | 2.71E-165 | 1.73E-164 |
| Hnrnpc     | 0.778071 | 3.01E-165 | 1.92E-164 |
| Gm47477    | 3.310428 | 3.29E-164 | 2.09E-163 |
| Gm37649    | 3.969892 | 3.15E-163 | 2.00E-162 |
| Fbxo27     | 2.486234 | 6.79E-164 | 4.32E-163 |
| Gm5136     | 3.727654 | 1.18E-162 | 7.47E-162 |
| Gm37376    | 1.312197 | 8.36E-164 | 5.31E-163 |
| Rbm26      | 1.050827 | 7.42E-164 | 4.72E-163 |
| Zfp397     | 1.195662 | 7.63E-164 | 4.85E-163 |
| Rdh11      | 1.7204   | 3.07E-163 | 1.95E-162 |
| D3Erttd751 | 1.739479 | 5.89E-163 | 3.73E-162 |

|           |          |           |           |
|-----------|----------|-----------|-----------|
| Hps4      | 1.691928 | 1.63E-162 | 1.03E-161 |
| Ctcf      | 0.833169 | 1.66E-162 | 1.05E-161 |
| Ctdspl2   | 1.128448 | 2.60E-162 | 1.64E-161 |
| Krit1     | 0.962724 | 3.37E-162 | 2.13E-161 |
| 2810029C  | 2.417862 | 1.23E-161 | 7.72E-161 |
| 9330162G  | 1.585193 | 6.44E-162 | 4.06E-161 |
| Poc5      | 1.653601 | 5.85E-162 | 3.68E-161 |
| Gm4258    | 1.485007 | 6.84E-162 | 4.30E-161 |
| Polr3k    | 1.356191 | 7.98E-162 | 5.02E-161 |
| Hilpda    | 1.615348 | 1.52E-161 | 9.55E-161 |
| Sltm      | 0.8932   | 1.29E-161 | 8.10E-161 |
| Chrac1    | 1.054585 | 1.43E-161 | 8.95E-161 |
| Meak7     | 2.375074 | 1.70E-160 | 1.07E-159 |
| Lsm4      | 1.101429 | 7.50E-161 | 4.70E-160 |
| Gpr180    | 1.596753 | 9.26E-161 | 5.80E-160 |
| Lrrc73    | 2.646514 | 4.52E-160 | 2.82E-159 |
| Myt1      | 2.23419  | 2.11E-160 | 1.32E-159 |
| Mecp2     | 0.940372 | 2.50E-160 | 1.56E-159 |
| 1700030J2 | 3.09236  | 1.41E-159 | 8.77E-159 |
| Vezt      | 1.388167 | 2.68E-160 | 1.67E-159 |
| Araf      | 1.033311 | 3.04E-160 | 1.90E-159 |
| Atp5g1    | 0.803679 | 3.61E-160 | 2.25E-159 |
| Zfp106    | 0.903242 | 6.87E-160 | 4.28E-159 |
| Slc25a37  | 1.841656 | 1.05E-159 | 6.51E-159 |
| 4931415C  | 3.48199  | 1.02E-158 | 6.32E-158 |
| Fndc4     | 1.792837 | 1.09E-159 | 6.77E-159 |
| Pde6c     | 2.66816  | 8.58E-159 | 5.30E-158 |
| Nup35     | 1.612535 | 4.23E-159 | 2.62E-158 |
| Gm37079   | 3.854862 | 1.49E-157 | 9.17E-157 |
| Cipc      | 1.354668 | 1.07E-158 | 6.60E-158 |
| Rhpn1     | 2.65989  | 3.85E-158 | 2.37E-157 |
| Ubxn7     | 1.240814 | 1.33E-158 | 8.22E-158 |
| Mier2     | 2.052863 | 1.99E-158 | 1.23E-157 |
| Igsf21    | 2.071864 | 4.12E-158 | 2.54E-157 |
| Lrrc8b    | 1.201142 | 2.95E-158 | 1.82E-157 |
| Tmem266   | 3.039418 | 3.58E-157 | 2.19E-156 |
| Ccpg1os   | 2.406972 | 3.79E-157 | 2.32E-156 |
| Hnrnpm    | 0.771979 | 1.77E-157 | 1.08E-156 |
| Fam126b   | 1.205668 | 2.60E-157 | 1.59E-156 |
| Suz12     | 0.908808 | 6.28E-157 | 3.84E-156 |
| Cyp4f41-p | 3.032371 | 3.44E-156 | 2.10E-155 |
| Rpl36-ps9 | 3.393581 | 1.29E-155 | 7.86E-155 |
| ENSMUSG   | 3.364812 | 9.23E-156 | 5.62E-155 |
| Kcnq1ot1  | 1.055992 | 1.69E-156 | 1.03E-155 |
| Lypla1    | 1.127372 | 3.57E-156 | 2.18E-155 |
| Tchp      | 1.915585 | 9.10E-156 | 5.54E-155 |
| Atf7ip    | 0.906372 | 1.54E-155 | 9.36E-155 |

|          |          |           |           |
|----------|----------|-----------|-----------|
| Borcs5   | 1.902165 | 2.47E-155 | 1.50E-154 |
| Atg16l1  | 1.539498 | 2.92E-155 | 1.77E-154 |
| Ttbk2    | 1.354743 | 5.31E-155 | 3.22E-154 |
| 5330413P | 3.248051 | 4.34E-154 | 2.62E-153 |
| Zscan26  | 1.100188 | 8.62E-155 | 5.22E-154 |
| Gpi1     | 0.737156 | 1.52E-154 | 9.18E-154 |
| Zfp131   | 1.207496 | 1.26E-154 | 7.62E-154 |
| 9230114K | 2.020825 | 2.87E-154 | 1.73E-153 |
| Gas8     | 1.824674 | 2.81E-154 | 1.70E-153 |
| 4632404H | 2.345761 | 6.36E-154 | 3.83E-153 |
| Tab3     | 1.904964 | 4.34E-154 | 2.62E-153 |
| Ptbp2    | 1.186857 | 1.19E-153 | 7.17E-153 |
| Camta2   | 1.440074 | 1.57E-153 | 9.45E-153 |
| Ppp1r9a  | 1.345303 | 1.44E-153 | 8.64E-153 |
| Brd3     | 0.967824 | 3.93E-153 | 2.36E-152 |
| Kmt5c    | 1.855361 | 7.42E-153 | 4.46E-152 |
| Ppm1d    | 1.370432 | 6.13E-153 | 3.68E-152 |
| Hsf2     | 1.60982  | 1.37E-152 | 8.24E-152 |
| Tecpr2   | 1.752245 | 2.56E-152 | 1.54E-151 |
| Cep85    | 1.773455 | 4.49E-152 | 2.69E-151 |
| E130308A | 1.727928 | 4.27E-152 | 2.56E-151 |
| Larp4    | 1.103162 | 3.54E-152 | 2.12E-151 |
| Naaa     | 1.92982  | 5.73E-152 | 3.42E-151 |
| Zfp386   | 1.401874 | 6.61E-152 | 3.94E-151 |
| Srsf10   | 0.928936 | 8.49E-152 | 5.06E-151 |
| Far1     | 1.089976 | 8.88E-152 | 5.29E-151 |
| Gsc2     | 2.948126 | 5.69E-151 | 3.38E-150 |
| Tpgs2    | 1.352881 | 1.63E-151 | 9.68E-151 |
| Pdp2     | 1.893447 | 4.94E-151 | 2.93E-150 |
| Mok      | 2.43782  | 7.01E-151 | 4.16E-150 |
| Cops3    | 1.126399 | 4.39E-151 | 2.61E-150 |
| Prrc2c   | 0.653288 | 7.05E-151 | 4.18E-150 |
| Celsr3   | 2.474476 | 2.65E-150 | 1.57E-149 |
| Ttll5    | 1.833678 | 2.08E-150 | 1.23E-149 |
| Tmem216  | 1.891787 | 2.75E-150 | 1.63E-149 |
| Pter     | 2.67385  | 1.05E-149 | 6.22E-149 |
| Ccdc191  | 1.879604 | 5.08E-150 | 3.00E-149 |
| Rbm7     | 0.944182 | 3.03E-150 | 1.79E-149 |
| Hnrnph1  | 0.70959  | 4.38E-150 | 2.59E-149 |
| Fnbp4    | 1.20661  | 4.56E-150 | 2.70E-149 |
| C1qtnf4  | 1.415859 | 4.93E-150 | 2.91E-149 |
| Trim44   | 0.920894 | 1.05E-149 | 6.21E-149 |
| Lrba     | 1.151058 | 1.14E-149 | 6.71E-149 |
| Hacd3    | 1.271292 | 1.22E-149 | 7.22E-149 |
| Zfp266   | 1.1193   | 1.25E-149 | 7.39E-149 |
| F630040K | 2.845058 | 5.04E-149 | 2.97E-148 |
| Amn1     | 1.347791 | 2.43E-149 | 1.43E-148 |

|            |          |           |           |
|------------|----------|-----------|-----------|
| Gm43322    | 2.6355   | 7.45E-149 | 4.37E-148 |
| 2900076A   | 1.948801 | 4.76E-149 | 2.80E-148 |
| Meig1      | 2.769982 | 1.09E-148 | 6.39E-148 |
| Dynlt2b    | 1.4961   | 4.75E-149 | 2.80E-148 |
| Gm37935    | 3.074669 | 8.65E-148 | 5.05E-147 |
| Tut4       | 0.90983  | 2.55E-148 | 1.49E-147 |
| Fra10ac1   | 1.363707 | 2.92E-148 | 1.71E-147 |
| Luc7l      | 1.015885 | 5.36E-148 | 3.13E-147 |
| Shoc2      | 1.027324 | 5.39E-148 | 3.15E-147 |
| Gm42716    | 2.124869 | 1.23E-147 | 7.20E-147 |
| Gm44532    | 3.693216 | 8.08E-147 | 4.70E-146 |
| Snx12      | 1.408899 | 8.01E-148 | 4.68E-147 |
| Pdzd2      | 0.959082 | 1.03E-147 | 6.02E-147 |
| Slc9a7     | 3.367818 | 2.33E-146 | 1.35E-145 |
| E530011L2  | 1.854916 | 9.30E-147 | 5.41E-146 |
| Slc22a29   | 5.250168 | 2.81E-145 | 1.62E-144 |
| Gm18194    | 3.014377 | 2.71E-146 | 1.57E-145 |
| Gm40477    | 2.957196 | 2.69E-146 | 1.56E-145 |
| Pcgf6      | 2.047392 | 1.40E-146 | 8.11E-146 |
| Fam104a    | 0.879171 | 1.09E-146 | 6.31E-146 |
| Zbtb37     | 1.329404 | 1.19E-146 | 6.89E-146 |
| Psmc6      | 0.846976 | 1.73E-146 | 1.01E-145 |
| Gon7       | 1.619403 | 1.88E-146 | 1.09E-145 |
| Rpl27a-ps4 | 2.739842 | 1.77E-145 | 1.02E-144 |
| Rufy2      | 1.412005 | 4.02E-146 | 2.32E-145 |
| Dcaf17     | 1.402716 | 3.81E-146 | 2.20E-145 |
| Zer1       | 1.307735 | 7.08E-146 | 4.09E-145 |
| Pgap3      | 2.444453 | 4.05E-145 | 2.33E-144 |
| Gm29170    | 2.539929 | 4.87E-145 | 2.80E-144 |
| Rabgap1l   | 1.32683  | 2.35E-145 | 1.36E-144 |
| Ndufb8     | 0.736704 | 2.71E-145 | 1.56E-144 |
| Gorasp2    | 1.080977 | 3.32E-145 | 1.91E-144 |
| Sod2       | 0.856632 | 1.74E-144 | 9.98E-144 |
| Mtrex      | 1.221458 | 1.78E-144 | 1.02E-143 |
| Nat14      | 1.572091 | 2.00E-144 | 1.14E-143 |
| Tspoap1    | 2.157368 | 4.78E-144 | 2.73E-143 |
| Lman2l     | 1.370757 | 4.06E-144 | 2.33E-143 |
| Lmbr1l     | 1.709384 | 5.84E-144 | 3.34E-143 |
| Trak2      | 1.058969 | 5.26E-144 | 3.01E-143 |
| Btaf1      | 1.347937 | 7.22E-144 | 4.12E-143 |
| Gm37607    | 2.731438 | 7.82E-143 | 4.44E-142 |
| Brwd3      | 1.460375 | 2.12E-143 | 1.21E-142 |
| Spring1    | 1.77868  | 4.40E-143 | 2.50E-142 |
| Ago2       | 1.028043 | 8.51E-143 | 4.83E-142 |
| Dtx3       | 0.957675 | 1.33E-142 | 7.55E-142 |
| Cldn23     | 3.490242 | 1.31E-141 | 7.41E-141 |
| Cabin1     | 1.291755 | 2.16E-142 | 1.22E-141 |

|          |          |           |           |
|----------|----------|-----------|-----------|
| Riok3    | 0.975817 | 3.63E-142 | 2.06E-141 |
| A930015D | 2.136313 | 1.31E-141 | 7.40E-141 |
| Col4a3   | 1.792482 | 1.88E-141 | 1.06E-140 |
| Ap5m1    | 1.397183 | 1.83E-141 | 1.03E-140 |
| Rasa2    | 1.117925 | 2.01E-141 | 1.13E-140 |
| Tubgcp4  | 1.494629 | 4.81E-141 | 2.72E-140 |
| Maneal   | 2.38268  | 6.34E-141 | 3.57E-140 |
| D5Ert579 | 1.059014 | 4.85E-141 | 2.73E-140 |
| Snhg12   | 1.118466 | 4.89E-141 | 2.75E-140 |
| 6430562O | 3.180607 | 2.84E-140 | 1.59E-139 |
| Wdr76    | 1.878634 | 1.04E-140 | 5.88E-140 |
| Klhl12   | 1.559688 | 1.26E-140 | 7.07E-140 |
| Gm10138  | 2.291338 | 3.77E-140 | 2.11E-139 |
| H3f3b    | 0.44993  | 2.96E-140 | 1.66E-139 |
| Relch    | 1.218444 | 2.10E-140 | 1.18E-139 |
| Sox12    | 1.603809 | 2.59E-140 | 1.45E-139 |
| Lingo3   | 2.173871 | 4.09E-140 | 2.29E-139 |
| 1110038F | 1.046703 | 4.06E-140 | 2.28E-139 |
| 2700033N | 2.536317 | 1.13E-139 | 6.32E-139 |
| Pik3ca   | 0.955639 | 7.22E-140 | 4.04E-139 |
| Gsk3b    | 0.65837  | 9.66E-140 | 5.40E-139 |
| Dync2i2  | 2.351745 | 1.65E-139 | 9.20E-139 |
| Psmg2    | 1.3392   | 3.64E-139 | 2.03E-138 |
| Rasgef1a | 2.016841 | 1.57E-138 | 8.71E-138 |
| Srsf4    | 0.95854  | 1.14E-138 | 6.37E-138 |
| Clk4     | 0.99158  | 1.35E-138 | 7.49E-138 |
| Supt7l   | 1.756026 | 2.77E-138 | 1.54E-137 |
| Alkbh1   | 1.525174 | 2.83E-138 | 1.57E-137 |
| Mau2     | 1.064025 | 2.55E-138 | 1.42E-137 |
| Wdr66    | 3.055176 | 2.09E-137 | 1.16E-136 |
| Trim36   | 2.573726 | 1.87E-137 | 1.04E-136 |
| Abhd14a  | 1.328129 | 1.52E-137 | 8.44E-137 |
| Zfp280d  | 1.012388 | 3.36E-137 | 1.85E-136 |
| Igf2bp3  | 2.281518 | 1.15E-136 | 6.34E-136 |
| Dennd6b  | 1.973571 | 7.41E-137 | 4.09E-136 |
| Mettl3   | 1.636732 | 7.47E-137 | 4.12E-136 |
| Khdrbs3  | 0.874031 | 1.21E-136 | 6.69E-136 |
| Gm16104  | 2.672502 | 3.00E-136 | 1.65E-135 |
| Fam122a  | 1.198113 | 1.87E-136 | 1.03E-135 |
| Eef2kmt  | 1.462652 | 2.04E-136 | 1.12E-135 |
| Gm37437  | 3.463267 | 1.15E-135 | 6.31E-135 |
| 2700038G | 2.304452 | 5.74E-136 | 3.15E-135 |
| Ubr3     | 0.967979 | 4.88E-136 | 2.68E-135 |
| Lcor     | 1.334815 | 6.02E-136 | 3.30E-135 |
| E230016M | 2.654211 | 1.85E-135 | 1.02E-134 |
| Dgkd     | 1.297218 | 7.75E-136 | 4.26E-135 |
| Gckr     | 2.39758  | 1.46E-135 | 8.00E-135 |

|          |          |           |           |
|----------|----------|-----------|-----------|
| Chfr     | 1.332901 | 9.89E-136 | 5.43E-135 |
| Dnajb2   | 1.108834 | 1.21E-135 | 6.64E-135 |
| Fabp4    | 2.114579 | 2.02E-135 | 1.11E-134 |
| Akap8l   | 1.021847 | 1.57E-135 | 8.60E-135 |
| Ppp3cb   | 0.94565  | 5.59E-135 | 3.05E-134 |
| 9530077C | 2.596066 | 4.26E-134 | 2.32E-133 |
| Cep19    | 1.459153 | 2.63E-134 | 1.43E-133 |
| Zfp605   | 1.992905 | 6.29E-134 | 3.43E-133 |
| Med6     | 1.308981 | 8.36E-134 | 4.55E-133 |
| 4931428F | 2.522036 | 2.27E-133 | 1.23E-132 |
| Cep57l1  | 1.851231 | 1.42E-133 | 7.70E-133 |
| MIlf1    | 2.33284  | 2.04E-133 | 1.10E-132 |
| Gm49405  | 3.237063 | 1.55E-132 | 8.35E-132 |
| Wdfy3    | 0.902195 | 6.43E-133 | 3.48E-132 |
| Stag2    | 0.849509 | 9.91E-133 | 5.36E-132 |
| Ranbp2   | 0.84475  | 1.12E-132 | 6.07E-132 |
| Srsf3    | 0.601444 | 1.39E-132 | 7.53E-132 |
| Akna     | 1.79474  | 1.93E-132 | 1.04E-131 |
| Gm26814  | 3.058851 | 8.25E-132 | 4.44E-131 |
| Gm32442  | 3.802914 | 2.01E-131 | 1.08E-130 |
| Zfp946   | 1.5966   | 4.65E-132 | 2.50E-131 |
| Rabl2    | 2.174105 | 6.43E-132 | 3.46E-131 |
| Sec22c   | 1.94923  | 9.37E-132 | 5.04E-131 |
| Crxos    | 2.840523 | 5.94E-131 | 3.18E-130 |
| Hdac9    | 1.416242 | 3.41E-131 | 1.83E-130 |
| Gm10686  | 2.942257 | 1.78E-130 | 9.50E-130 |
| Lrit3    | 2.975529 | 1.95E-130 | 1.04E-129 |
| Fmr1     | 0.978182 | 7.46E-131 | 4.00E-130 |
| Abhd17b  | 1.158355 | 8.38E-131 | 4.49E-130 |
| Abhd3    | 2.399839 | 1.94E-130 | 1.04E-129 |
| Usp19    | 0.983892 | 9.29E-131 | 4.97E-130 |
| Cdkl2    | 2.357286 | 1.94E-130 | 1.03E-129 |
| Dynlt1a  | 1.89057  | 3.33E-130 | 1.77E-129 |
| Gm48063  | 3.587674 | 1.31E-129 | 6.93E-129 |
| Oard1    | 1.058738 | 2.16E-130 | 1.15E-129 |
| Apex2    | 2.014132 | 3.95E-130 | 2.10E-129 |
| Tasp1    | 1.939917 | 3.44E-130 | 1.83E-129 |
| 6030458C | 1.479897 | 3.27E-130 | 1.74E-129 |
| Zfp428   | 1.754473 | 5.52E-130 | 2.93E-129 |
| Desi1    | 1.193122 | 4.70E-130 | 2.50E-129 |
| Grpel2   | 1.670572 | 5.99E-130 | 3.18E-129 |
| Alpl     | 0.826182 | 1.15E-129 | 6.08E-129 |
| Atxn2    | 0.956194 | 9.53E-130 | 5.06E-129 |
| Sirt3    | 1.493613 | 1.23E-129 | 6.50E-129 |
| Rbm4b    | 1.18278  | 1.74E-129 | 9.21E-129 |
| 0610038B | 2.772685 | 4.98E-129 | 2.63E-128 |
| Khsrp    | 1.079409 | 3.62E-129 | 1.91E-128 |

|           |          |           |           |
|-----------|----------|-----------|-----------|
| Abhd8     | 1.079739 | 5.24E-129 | 2.77E-128 |
| Radil     | 2.611354 | 1.45E-128 | 7.63E-128 |
| 6720427I0 | 1.369532 | 7.40E-129 | 3.90E-128 |
| Rragd     | 1.965221 | 1.15E-128 | 6.05E-128 |
| Cdcp3     | 2.719351 | 4.47E-128 | 2.35E-127 |
| Oscp1     | 2.187573 | 3.82E-128 | 2.01E-127 |
| Zcchc8    | 1.187492 | 2.87E-128 | 1.51E-127 |
| Akap6     | 1.745474 | 4.08E-128 | 2.14E-127 |
| Dut       | 1.140233 | 6.90E-128 | 3.62E-127 |
| C430042M  | 3.256521 | 3.90E-127 | 2.04E-126 |
| Pgap1     | 1.856482 | 1.38E-127 | 7.21E-127 |
| Cdkl5     | 1.781875 | 1.53E-127 | 8.01E-127 |
| Slc24a5   | 1.435776 | 3.28E-127 | 1.72E-126 |
| Alg10b    | 1.145894 | 3.08E-127 | 1.61E-126 |
| Hadha     | 0.905295 | 5.67E-127 | 2.96E-126 |
| Pabpn1    | 1.008228 | 7.35E-127 | 3.84E-126 |
| Tsga10    | 1.804672 | 9.98E-127 | 5.21E-126 |
| Chst3     | 2.082554 | 1.34E-126 | 6.97E-126 |
| Gm42447   | 3.038224 | 4.63E-126 | 2.41E-125 |
| Gria2     | 1.673093 | 1.83E-126 | 9.57E-126 |
| 1700028E: | 3.10722  | 1.18E-125 | 6.13E-125 |
| Naa40     | 1.517127 | 2.98E-126 | 1.56E-125 |
| Lcmt2     | 2.11726  | 4.64E-126 | 2.41E-125 |
| Srsf6     | 0.906488 | 4.87E-126 | 2.53E-125 |
| Dek       | 0.672322 | 8.66E-126 | 4.50E-125 |
| Gm14505   | 3.235396 | 2.09E-125 | 1.08E-124 |
| Stk17b    | 1.32388  | 1.46E-125 | 7.55E-125 |
| Zmat1     | 1.446351 | 1.78E-125 | 9.23E-125 |
| Timm9     | 1.263893 | 1.80E-125 | 9.33E-125 |
| Zc3h13    | 0.847727 | 2.11E-125 | 1.09E-124 |
| Azin1     | 0.990023 | 2.75E-125 | 1.42E-124 |
| Gm45828   | 1.448293 | 4.40E-125 | 2.27E-124 |
| Gm44164   | 1.887463 | 7.12E-125 | 3.67E-124 |
| Oxct1     | 1.020758 | 5.50E-125 | 2.84E-124 |
| Akr1e1    | 1.391839 | 6.06E-125 | 3.12E-124 |
| Gm45407   | 2.52171  | 1.38E-124 | 7.11E-124 |
| Usp47     | 0.89455  | 7.60E-125 | 3.91E-124 |
| Nol4l     | 1.340144 | 9.24E-125 | 4.75E-124 |
| Eid2b     | 1.482479 | 1.26E-124 | 6.46E-124 |
| Jkamp     | 0.978251 | 1.14E-124 | 5.88E-124 |
| Zfp952    | 1.602588 | 1.96E-124 | 1.01E-123 |
| Stxbp5    | 1.219472 | 2.10E-124 | 1.08E-123 |
| Swt1      | 0.928972 | 3.31E-124 | 1.70E-123 |
| Tmem229l  | 1.52723  | 4.22E-124 | 2.16E-123 |
| Zfp563    | 1.885196 | 6.27E-124 | 3.20E-123 |
| Cdk13     | 0.916475 | 5.33E-124 | 2.73E-123 |
| Mamld1    | 1.585287 | 6.26E-124 | 3.20E-123 |



|          |          |           |           |
|----------|----------|-----------|-----------|
| Actl6a   | 1.032713 | 5.80E-124 | 2.97E-123 |
| Dph6     | 1.344454 | 6.14E-124 | 3.14E-123 |
| Ccdc96   | 3.183166 | 4.73E-123 | 2.41E-122 |
| Dmtf1    | 1.06657  | 1.96E-123 | 9.98E-123 |
| Nme5     | 2.275447 | 3.08E-123 | 1.57E-122 |
| Ythdc1   | 0.717697 | 2.78E-123 | 1.42E-122 |
| Edil3    | 1.777319 | 2.98E-123 | 1.52E-122 |
| Cyp2u1   | 2.012938 | 3.80E-123 | 1.94E-122 |
| Zfp37    | 1.508152 | 3.72E-123 | 1.90E-122 |
| Kantr    | 1.510983 | 9.76E-123 | 4.96E-122 |
| Acadm    | 0.846935 | 1.08E-122 | 5.47E-122 |
| Golga4   | 0.787362 | 1.11E-122 | 5.65E-122 |
| Orc4     | 1.164918 | 1.06E-122 | 5.37E-122 |
| Usp29    | 2.466872 | 2.60E-122 | 1.32E-121 |
| Eef1e1   | 1.468634 | 1.62E-122 | 8.21E-122 |
| Etnk1    | 0.725134 | 1.72E-122 | 8.72E-122 |
| Cbx8     | 1.979508 | 3.24E-122 | 1.64E-121 |
| Mast1    | 2.300499 | 2.68E-122 | 1.36E-121 |
| Mob1b    | 1.096501 | 2.23E-122 | 1.13E-121 |
| Spry2    | 1.223455 | 2.31E-122 | 1.17E-121 |
| Pptc7    | 1.239923 | 2.75E-122 | 1.39E-121 |
| Ube3c    | 1.125756 | 3.52E-122 | 1.78E-121 |
| Thoc5    | 1.503588 | 4.57E-122 | 2.31E-121 |
| Samd15   | 3.119746 | 2.78E-121 | 1.40E-120 |
| Ttll1    | 2.006445 | 1.10E-121 | 5.52E-121 |
| Mylip    | 1.306145 | 1.01E-121 | 5.07E-121 |
| Srsf5    | 0.579918 | 1.31E-121 | 6.59E-121 |
| Tmem60   | 1.169507 | 3.25E-121 | 1.63E-120 |
| Gm42585  | 2.68192  | 1.34E-120 | 6.73E-120 |
| Peg13    | 1.002261 | 3.92E-121 | 1.97E-120 |
| Senp7    | 1.066913 | 4.48E-121 | 2.25E-120 |
| Gm47101  | 3.195101 | 1.85E-120 | 9.23E-120 |
| Gm37891  | 3.28265  | 1.51E-120 | 7.57E-120 |
| Lcorl    | 1.137599 | 4.96E-121 | 2.48E-120 |
| Ccdc148  | 2.463863 | 1.67E-120 | 8.33E-120 |
| Rbm33    | 1.045401 | 7.93E-121 | 3.97E-120 |
| Zfp597   | 1.54226  | 1.71E-120 | 8.54E-120 |
| 4921531C | 2.601467 | 4.61E-120 | 2.30E-119 |
| L3hypdh  | 1.845664 | 2.54E-120 | 1.27E-119 |
| 2610037D | 1.377127 | 2.25E-120 | 1.12E-119 |
| Impa1    | 1.051289 | 2.19E-120 | 1.09E-119 |
| Rraga    | 0.868046 | 5.84E-120 | 2.91E-119 |
| Brd3os   | 2.262226 | 1.23E-119 | 6.11E-119 |
| Secisbp2 | 1.244573 | 8.01E-120 | 3.98E-119 |
| Uspl1    | 1.289395 | 8.39E-120 | 4.17E-119 |
| Wdr6     | 1.222233 | 9.63E-120 | 4.78E-119 |
| Stx16    | 0.985521 | 1.08E-119 | 5.35E-119 |

|          |          |           |           |
|----------|----------|-----------|-----------|
| Tmem260  | 1.315485 | 1.36E-119 | 6.74E-119 |
| Rlf      | 1.046389 | 1.54E-119 | 7.62E-119 |
| Alkbh7   | 1.295529 | 2.91E-119 | 1.44E-118 |
| 1500015A | 1.963004 | 4.03E-119 | 2.00E-118 |
| Leo1     | 1.267381 | 2.85E-119 | 1.41E-118 |
| Zfp638   | 0.756538 | 3.51E-119 | 1.74E-118 |
| Gm49154  | 3.428545 | 1.56E-118 | 7.69E-118 |
| 1700081N | 3.088583 | 1.31E-118 | 6.47E-118 |
| Gm14703  | 3.466112 | 2.48E-118 | 1.22E-117 |
| Rad9b    | 2.144772 | 1.05E-118 | 5.19E-118 |
| Cdh16    | 2.879985 | 2.54E-118 | 1.25E-117 |
| Syncrip  | 0.827974 | 1.25E-118 | 6.15E-118 |
| Rab5if   | 0.862183 | 1.23E-118 | 6.07E-118 |
| Srp54a   | 1.592288 | 1.37E-118 | 6.73E-118 |
| Mga      | 0.822531 | 1.51E-118 | 7.44E-118 |
| Psm9     | 1.228117 | 1.70E-118 | 8.38E-118 |
| 3110056K | 1.226184 | 1.75E-118 | 8.63E-118 |
| Gm49937  | 3.081156 | 5.32E-118 | 2.61E-117 |
| Ppp1r10  | 1.023288 | 3.37E-118 | 1.66E-117 |
| Fn3k     | 1.980152 | 4.54E-118 | 2.23E-117 |
| Set      | 0.646276 | 4.10E-118 | 2.01E-117 |
| Cep89    | 1.942902 | 4.89E-118 | 2.40E-117 |
| Ppm1e    | 1.684783 | 4.32E-118 | 2.12E-117 |
| Lsm12    | 0.971185 | 9.88E-118 | 4.84E-117 |
| Prpsap2  | 1.364299 | 1.82E-117 | 8.90E-117 |
| Bclaf1   | 0.660114 | 2.12E-117 | 1.03E-116 |
| Zmym2    | 0.986011 | 1.97E-117 | 9.65E-117 |
| MIh3     | 1.408619 | 2.59E-117 | 1.26E-116 |
| Iqcg     | 2.663981 | 5.77E-117 | 2.81E-116 |
| Dynlt2a2 | 1.754725 | 3.31E-117 | 1.62E-116 |
| RbmX     | 1.039768 | 3.72E-117 | 1.81E-116 |
| Cfap61   | 3.563908 | 1.77E-116 | 8.61E-116 |
| Pms1     | 1.889348 | 5.06E-117 | 2.46E-116 |
| Tnks2    | 0.778501 | 5.84E-117 | 2.85E-116 |
| Mta2     | 1.044025 | 6.21E-117 | 3.02E-116 |
| Atg4c    | 1.888246 | 8.92E-117 | 4.34E-116 |
| Stk39    | 1.117399 | 6.67E-117 | 3.25E-116 |
| Prr14    | 1.149583 | 7.23E-117 | 3.52E-116 |
| Poldip3  | 0.992411 | 7.70E-117 | 3.74E-116 |
| 2410124H | 3.55879  | 5.26E-116 | 2.55E-115 |
| Eepd1    | 1.71866  | 2.10E-116 | 1.02E-115 |
| Ift88    | 1.944144 | 3.00E-116 | 1.46E-115 |
| 1600012H | 1.385121 | 2.64E-116 | 1.28E-115 |
| Atp7b    | 3.147321 | 8.15E-116 | 3.95E-115 |
| Carmil3  | 2.575023 | 6.95E-116 | 3.37E-115 |
| Mphosph8 | 0.818853 | 5.31E-116 | 2.58E-115 |
| Gm43005  | 2.793126 | 1.81E-115 | 8.75E-115 |

|            |          |           |           |
|------------|----------|-----------|-----------|
| Rnf181     | 1.113824 | 7.85E-116 | 3.81E-115 |
| Tnrc6a     | 0.765066 | 1.04E-115 | 5.02E-115 |
| Cox5a      | 0.594059 | 1.17E-115 | 5.66E-115 |
| Osbp16     | 1.72733  | 1.24E-115 | 6.01E-115 |
| Arih1      | 0.89387  | 1.35E-115 | 6.53E-115 |
| Zfp24      | 1.015076 | 1.42E-115 | 6.85E-115 |
| Zscan18    | 2.34382  | 2.45E-115 | 1.18E-114 |
| Dcun1d2    | 1.560091 | 1.94E-115 | 9.39E-115 |
| Zfp446     | 2.027236 | 2.30E-115 | 1.11E-114 |
| Mycbp2     | 0.702397 | 2.48E-115 | 1.20E-114 |
| Tspyl4     | 1.129284 | 3.02E-115 | 1.46E-114 |
| C03003412  | 1.756278 | 4.58E-115 | 2.20E-114 |
| Dmxl1      | 0.904778 | 4.32E-115 | 2.08E-114 |
| Gspt1      | 0.827972 | 5.45E-115 | 2.62E-114 |
| Ip6k1      | 0.873075 | 6.66E-115 | 3.20E-114 |
| Tmem243    | 0.921646 | 8.90E-115 | 4.27E-114 |
| Bmt2       | 1.222856 | 1.12E-114 | 5.39E-114 |
| Chga       | 1.801399 | 1.68E-114 | 8.04E-114 |
| Ocr1       | 1.264811 | 5.77E-114 | 2.76E-113 |
| St6galnac5 | 2.933121 | 1.98E-113 | 9.45E-113 |
| 4921504A   | 2.640789 | 1.53E-113 | 7.31E-113 |
| Gm45534    | 2.875316 | 3.01E-113 | 1.43E-112 |
| 2610301B   | 1.542587 | 2.08E-113 | 9.92E-113 |
| Dhx30      | 1.024559 | 2.04E-113 | 9.74E-113 |
| Aggf1      | 0.989171 | 2.27E-113 | 1.08E-112 |
| Chchd3     | 0.992418 | 4.91E-113 | 2.34E-112 |
| Lrp11      | 2.34702  | 7.06E-113 | 3.36E-112 |
| Ybx1       | 0.497036 | 6.79E-113 | 3.23E-112 |
| Odad4      | 3.693526 | 4.56E-112 | 2.16E-111 |
| Fsbp       | 3.008463 | 2.86E-112 | 1.36E-111 |
| Kif1a      | 1.016783 | 1.51E-112 | 7.17E-112 |
| Mfap3      | 1.118504 | 1.64E-112 | 7.78E-112 |
| Dnttip2    | 0.874788 | 2.06E-112 | 9.77E-112 |
| Rpgrip1l   | 1.905925 | 4.20E-112 | 1.99E-111 |
| Elmod1     | 1.12469  | 8.34E-112 | 3.95E-111 |
| Slc25a29   | 2.124097 | 1.26E-111 | 5.96E-111 |
| Gm43010    | 2.368367 | 1.76E-111 | 8.33E-111 |
| Phospho2   | 1.399686 | 1.44E-111 | 6.80E-111 |
| lqcd       | 2.703871 | 4.12E-111 | 1.94E-110 |
| Gm42841    | 2.226004 | 3.53E-111 | 1.66E-110 |
| Eml1       | 1.199249 | 3.38E-111 | 1.59E-110 |
| Slc9a5     | 2.429411 | 5.25E-111 | 2.47E-110 |
| Rps6kb1    | 0.876536 | 4.75E-111 | 2.24E-110 |
| Hdgfl3     | 0.905101 | 5.73E-111 | 2.70E-110 |
| Ccdc186    | 0.865361 | 5.98E-111 | 2.81E-110 |
| Als2       | 1.953289 | 8.27E-111 | 3.88E-110 |
| Fam216a    | 1.320321 | 7.96E-111 | 3.74E-110 |

|          |          |           |           |
|----------|----------|-----------|-----------|
| Rnf5     | 1.026822 | 8.34E-111 | 3.92E-110 |
| Dleu7    | 3.291034 | 3.77E-110 | 1.76E-109 |
| Med31    | 1.015637 | 1.34E-110 | 6.28E-110 |
| Gm28578  | 2.386785 | 2.63E-110 | 1.23E-109 |
| Osgep    | 1.003189 | 1.81E-110 | 8.47E-110 |
| Srrm4    | 1.691001 | 2.00E-110 | 9.38E-110 |
| Fbxw9    | 1.57183  | 2.46E-110 | 1.15E-109 |
| Myef2    | 1.043605 | 2.30E-110 | 1.08E-109 |
| Smc3     | 0.689105 | 2.55E-110 | 1.19E-109 |
| Psip1    | 0.74551  | 2.75E-110 | 1.29E-109 |
| Ercc2    | 1.610702 | 3.36E-110 | 1.57E-109 |
| Poc1b    | 1.47129  | 3.66E-110 | 1.71E-109 |
| Zkscan7  | 1.966827 | 6.57E-110 | 3.07E-109 |
| Fam53c   | 1.290226 | 7.40E-110 | 3.45E-109 |
| Mttp     | 1.778308 | 9.42E-110 | 4.39E-109 |
| Aqr      | 0.99817  | 7.82E-110 | 3.65E-109 |
| Bsn      | 2.305801 | 1.26E-109 | 5.89E-109 |
| Trappc8  | 1.052341 | 8.80E-110 | 4.10E-109 |
| Hinfp    | 1.499    | 1.01E-109 | 4.71E-109 |
| Slc25a27 | 1.375949 | 1.02E-109 | 4.76E-109 |
| Arhgap39 | 1.899355 | 1.73E-109 | 8.04E-109 |
| Scg3     | 1.721549 | 1.55E-109 | 7.21E-109 |
| Svop     | 2.342031 | 4.47E-109 | 2.07E-108 |
| A130014A | 1.666891 | 4.06E-109 | 1.88E-108 |
| Paxbp1   | 1.173801 | 3.66E-109 | 1.70E-108 |
| Jag1     | 0.866155 | 5.20E-109 | 2.41E-108 |
| Gm42444  | 3.551827 | 2.09E-108 | 9.66E-108 |
| Tmem161l | 1.503801 | 5.78E-109 | 2.68E-108 |
| Pfkl     | 0.760436 | 7.80E-109 | 3.61E-108 |
| Upf2     | 0.861304 | 8.38E-109 | 3.88E-108 |
| Intu     | 2.337661 | 1.95E-108 | 9.03E-108 |
| Cfap20   | 0.9323   | 1.27E-108 | 5.89E-108 |
| Polr3a   | 1.580859 | 1.62E-108 | 7.49E-108 |
| Zfp660   | 2.050668 | 2.64E-108 | 1.22E-107 |
| Zdhhc12  | 1.513812 | 3.17E-108 | 1.46E-107 |
| Mphosph9 | 1.274818 | 3.56E-108 | 1.64E-107 |
| Gm26666  | 3.168147 | 1.50E-107 | 6.88E-107 |
| Smc4     | 1.098302 | 5.76E-108 | 2.65E-107 |
| Hspa14   | 1.082327 | 6.54E-108 | 3.01E-107 |
| Tent4b   | 1.005339 | 7.53E-108 | 3.47E-107 |
| Ccnl2    | 0.759843 | 1.16E-107 | 5.33E-107 |
| Gpatch11 | 1.088723 | 1.28E-107 | 5.86E-107 |
| 2700062C | 1.621709 | 1.52E-107 | 6.98E-107 |
| Gm45132  | 3.158771 | 4.30E-107 | 1.97E-106 |
| Dnajb14  | 0.889517 | 1.59E-107 | 7.27E-107 |
| Dld      | 0.934272 | 1.95E-107 | 8.97E-107 |
| Kdm2a    | 0.791987 | 2.31E-107 | 1.06E-106 |

|          |          |           |           |
|----------|----------|-----------|-----------|
| 27000970 | 1.652324 | 3.53E-107 | 1.62E-106 |
| Med24    | 1.591816 | 3.78E-107 | 1.73E-106 |
| Gtpbp1   | 1.353733 | 4.46E-107 | 2.04E-106 |
| Sfpq     | 0.609569 | 7.47E-107 | 3.41E-106 |
| Senp8    | 2.429078 | 1.39E-106 | 6.35E-106 |
| Fam199x  | 1.273934 | 7.75E-107 | 3.54E-106 |
| Ctsf     | 1.005986 | 8.98E-107 | 4.10E-106 |
| Rbm15    | 1.16505  | 1.30E-106 | 5.95E-106 |
| Tet2     | 1.006039 | 1.33E-106 | 6.06E-106 |
| Rprd1b   | 0.955175 | 2.72E-106 | 1.24E-105 |
| Rab10os  | 1.236867 | 3.81E-106 | 1.73E-105 |
| Cisd2    | 0.842937 | 4.09E-106 | 1.86E-105 |
| Lsm7     | 1.000368 | 4.81E-106 | 2.19E-105 |
| Opa3     | 1.290165 | 1.55E-105 | 7.05E-105 |
| 9630010A | 1.878786 | 1.79E-105 | 8.12E-105 |
| Rtn2     | 1.619732 | 2.18E-105 | 9.86E-105 |
| E4f1     | 1.334623 | 2.65E-105 | 1.20E-104 |
| Soga3    | 2.101856 | 6.31E-105 | 2.85E-104 |
| Fam204a  | 0.918551 | 5.47E-105 | 2.48E-104 |
| Mpdu1    | 1.184081 | 6.11E-105 | 2.76E-104 |
| Zbtb5    | 1.733047 | 7.31E-105 | 3.30E-104 |
| Fam161b  | 2.449023 | 1.37E-104 | 6.18E-104 |
| Lrp4     | 1.820165 | 2.46E-104 | 1.11E-103 |
| Trip11   | 0.776542 | 2.49E-104 | 1.12E-103 |
| Ivd      | 1.383981 | 2.54E-104 | 1.15E-103 |
| Cetn4    | 1.763511 | 2.67E-104 | 1.20E-103 |
| Ofd1     | 1.525457 | 2.87E-104 | 1.29E-103 |
| Zfp846   | 1.573522 | 2.98E-104 | 1.34E-103 |
| Ccdc180  | 2.618579 | 4.49E-104 | 2.02E-103 |
| Gm12346  | 2.061287 | 4.60E-104 | 2.06E-103 |
| Rogdi    | 1.134565 | 4.15E-104 | 1.87E-103 |
| Setd2    | 0.810862 | 4.91E-104 | 2.20E-103 |
| Chaserr  | 0.815173 | 9.39E-104 | 4.20E-103 |
| Gm42943  | 2.82637  | 1.83E-103 | 8.17E-103 |
| Mrpl32   | 0.995932 | 1.09E-103 | 4.86E-103 |
| Pou2f1   | 0.949965 | 1.20E-103 | 5.36E-103 |
| Riox2    | 1.658947 | 2.32E-103 | 1.03E-102 |
| Rsb1     | 0.83733  | 2.14E-103 | 9.57E-103 |
| MLlt6    | 0.751938 | 2.26E-103 | 1.01E-102 |
| Irak1bp1 | 1.164606 | 2.62E-103 | 1.17E-102 |
| Ccna2    | 2.411002 | 3.57E-103 | 1.59E-102 |
| Ate1     | 0.852926 | 4.75E-103 | 2.12E-102 |
| Cul9     | 1.449845 | 5.84E-103 | 2.60E-102 |
| Ppp2r3a  | 1.02336  | 8.21E-103 | 3.65E-102 |
| Nhlrc2   | 0.996899 | 9.43E-103 | 4.20E-102 |
| Ints6    | 1.084203 | 9.59E-103 | 4.26E-102 |
| Hypk     | 0.915909 | 1.01E-102 | 4.50E-102 |

|          |          |           |           |
|----------|----------|-----------|-----------|
| Gxylt1   | 1.104266 | 1.10E-102 | 4.90E-102 |
| Uhrf2    | 0.840916 | 1.27E-102 | 5.65E-102 |
| Fam160a2 | 1.3885   | 2.16E-102 | 9.60E-102 |
| Glo1     | 0.567169 | 2.43E-102 | 1.08E-101 |
| Irf3     | 1.012445 | 2.71E-102 | 1.20E-101 |
| Phc2     | 0.840204 | 3.39E-102 | 1.50E-101 |
| Snhg1    | 1.005507 | 3.50E-102 | 1.55E-101 |
| Ccdc117  | 1.203631 | 4.43E-102 | 1.96E-101 |
| Bcl7a    | 1.633995 | 7.85E-102 | 3.47E-101 |
| Cnot1    | 0.883575 | 8.85E-102 | 3.91E-101 |
| Rapgef5  | 0.701401 | 9.42E-102 | 4.16E-101 |
| Mrpl15   | 0.943285 | 1.62E-101 | 7.16E-101 |
| Dicer1   | 0.848192 | 1.86E-101 | 8.22E-101 |
| Gm42446  | 2.983264 | 3.34E-101 | 1.47E-100 |
| Knop1    | 0.875953 | 2.05E-101 | 9.03E-101 |
| Stag1    | 0.733867 | 2.22E-101 | 9.76E-101 |
| Chtop    | 0.791709 | 2.62E-101 | 1.15E-100 |
| Aars     | 1.221169 | 3.13E-101 | 1.37E-100 |
| Thap2    | 1.012843 | 3.12E-101 | 1.37E-100 |
| Nr6a1    | 2.171034 | 4.85E-101 | 2.13E-100 |
| Ube2j1   | 1.084196 | 3.33E-101 | 1.46E-100 |
| Iffo1    | 1.431734 | 4.10E-101 | 1.80E-100 |
| Efr3a    | 0.808099 | 4.82E-101 | 2.11E-100 |
| Rtl6     | 1.888758 | 7.04E-101 | 3.09E-100 |
| Krt10    | 1.194099 | 1.15E-100 | 5.02E-100 |
| 4930526A | 3.657863 | 4.08E-100 | 1.79E-99  |
| Gje1     | 3.069572 | 4.68E-100 | 2.05E-99  |
| Gm12689  | 2.981786 | 6.75E-100 | 2.95E-99  |
| Rrnad1   | 1.311807 | 4.86E-100 | 2.13E-99  |
| Pde7a    | 1.502242 | 5.23E-100 | 2.29E-99  |
| Mdm4     | 0.886044 | 7.28E-100 | 3.18E-99  |
| Gnptg    | 1.127361 | 1.03E-99  | 4.48E-99  |
| Hemk1    | 2.132899 | 1.48E-99  | 6.47E-99  |
| Ppil4    | 0.880601 | 1.21E-99  | 5.26E-99  |
| Pigs     | 1.327387 | 1.32E-99  | 5.76E-99  |
| Mdh2     | 0.64701  | 1.49E-99  | 6.50E-99  |
| Ptp4a2   | 0.559333 | 1.75E-99  | 7.61E-99  |
| Ddx46    | 0.778611 | 1.71E-99  | 7.45E-99  |
| Cxadr    | 1.648362 | 1.74E-99  | 7.60E-99  |
| Lgmn     | 0.935513 | 2.25E-99  | 9.78E-99  |
| Rbm48    | 1.254621 | 2.75E-99  | 1.20E-98  |
| Zfp949   | 1.52611  | 3.47E-99  | 1.51E-98  |
| 1700088E | 2.265103 | 4.57E-99  | 1.98E-98  |
| Zgrf1    | 2.121667 | 4.53E-99  | 1.97E-98  |
| Gm42448  | 3.134575 | 9.28E-99  | 4.02E-98  |
| Ccdc39   | 2.757279 | 9.99E-99  | 4.33E-98  |
| Gm45178  | 2.22679  | 7.17E-99  | 3.11E-98  |

|           |          |          |          |
|-----------|----------|----------|----------|
| Tmem135   | 1.308529 | 6.11E-99 | 2.65E-98 |
| Gm37219   | 3.021565 | 1.19E-98 | 5.14E-98 |
| Gm43287   | 4.518008 | 4.89E-98 | 2.11E-97 |
| Gm36684   | 1.958634 | 1.71E-98 | 7.38E-98 |
| Nrf1      | 1.087016 | 1.45E-98 | 6.27E-98 |
| 2610005LC | 1.303253 | 1.89E-98 | 8.18E-98 |
| Wasf1     | 2.100805 | 2.22E-98 | 9.59E-98 |
| Apbb1     | 1.108284 | 2.13E-98 | 9.21E-98 |
| Pspc1     | 1.158445 | 2.94E-98 | 1.27E-97 |
| Tmco3     | 1.134593 | 2.93E-98 | 1.26E-97 |
| Rassf8    | 1.072714 | 3.09E-98 | 1.33E-97 |
| Cfap69    | 2.448971 | 5.26E-98 | 2.26E-97 |
| Akap8     | 0.844449 | 4.70E-98 | 2.02E-97 |
| Dnal4     | 1.304214 | 5.10E-98 | 2.20E-97 |
| Gm29560   | 3.116878 | 1.41E-97 | 6.02E-97 |
| Trip12    | 0.722534 | 6.51E-98 | 2.80E-97 |
| Pdik1l    | 1.259865 | 6.77E-98 | 2.91E-97 |
| Chuk      | 1.067528 | 8.30E-98 | 3.56E-97 |
| Fubp1     | 0.638698 | 9.23E-98 | 3.96E-97 |
| Gm16124   | 1.894755 | 9.76E-98 | 4.19E-97 |
| Gm15506   | 2.191292 | 1.26E-97 | 5.42E-97 |
| Tmem67    | 1.76552  | 1.09E-97 | 4.66E-97 |
| Rfx1      | 1.525871 | 1.02E-97 | 4.36E-97 |
| Gm28959   | 3.626304 | 3.38E-97 | 1.44E-96 |
| Pi4k2a    | 1.24233  | 1.40E-97 | 6.00E-97 |
| 1500011B  | 0.991792 | 1.58E-97 | 6.75E-97 |
| Phyh      | 0.944245 | 2.09E-97 | 8.92E-97 |
| Nin       | 0.917466 | 2.41E-97 | 1.03E-96 |
| Mllt10    | 0.806416 | 2.58E-97 | 1.10E-96 |
| Zfp442    | 1.856438 | 3.78E-97 | 1.61E-96 |
| Zfp507    | 1.432356 | 3.66E-97 | 1.56E-96 |
| Spryd7    | 1.388665 | 3.62E-97 | 1.54E-96 |
| Sppl2b    | 1.595042 | 4.87E-97 | 2.07E-96 |
| Sirpa     | 1.28536  | 5.17E-97 | 2.20E-96 |
| Nt5c3     | 1.214243 | 7.35E-97 | 3.13E-96 |
| Adam9     | 1.222482 | 8.04E-97 | 3.42E-96 |
| Dtnb      | 1.4909   | 9.65E-97 | 4.10E-96 |
| Prxl2a    | 1.008387 | 1.23E-96 | 5.24E-96 |
| Tcp11     | 2.344189 | 2.19E-96 | 9.30E-96 |
| Wdr5b     | 1.903527 | 2.47E-96 | 1.05E-95 |
| Prepl     | 1.606263 | 2.14E-96 | 9.10E-96 |
| Tmem59l   | 1.870292 | 2.60E-96 | 1.10E-95 |
| Carf      | 1.502712 | 2.57E-96 | 1.09E-95 |
| Paip1     | 0.83344  | 2.71E-96 | 1.15E-95 |
| Zfp60     | 1.363891 | 2.65E-96 | 1.12E-95 |
| Zfp90     | 1.50326  | 2.75E-96 | 1.16E-95 |
| Tbc1d23   | 0.983091 | 3.33E-96 | 1.41E-95 |

|          |          |          |          |
|----------|----------|----------|----------|
| Acbd7    | 2.478051 | 5.07E-96 | 2.14E-95 |
| Vps50    | 1.404971 | 4.04E-96 | 1.71E-95 |
| Rab39b   | 2.069922 | 5.45E-96 | 2.30E-95 |
| Enox1    | 1.937682 | 6.17E-96 | 2.60E-95 |
| Ccdc92   | 1.854877 | 9.74E-96 | 4.11E-95 |
| Chrnbl   | 1.965721 | 1.85E-95 | 7.79E-95 |
| Abhd18   | 1.414222 | 1.57E-95 | 6.60E-95 |
| Nphp4    | 2.529147 | 3.16E-95 | 1.33E-94 |
| Zmym6    | 1.657215 | 2.33E-95 | 9.83E-95 |
| Zranb2   | 0.664113 | 2.51E-95 | 1.05E-94 |
| Brca1    | 3.172321 | 7.06E-95 | 2.96E-94 |
| Phf3     | 0.705359 | 3.78E-95 | 1.59E-94 |
| Arih2    | 1.150949 | 3.87E-95 | 1.63E-94 |
| Brcc3    | 1.099926 | 4.03E-95 | 1.69E-94 |
| Gm44856  | 4.363697 | 1.62E-94 | 6.80E-94 |
| Zfp354a  | 1.615552 | 7.24E-95 | 3.04E-94 |
| Ddit3    | 0.989544 | 6.59E-95 | 2.77E-94 |
| Grin2d   | 2.678051 | 1.12E-94 | 4.69E-94 |
| Rtn4     | 0.531047 | 1.83E-94 | 7.67E-94 |
| Cisd1    | 0.744175 | 1.33E-94 | 5.56E-94 |
| Tpi1     | 0.568995 | 2.05E-94 | 8.58E-94 |
| Ecsit    | 1.258517 | 2.59E-94 | 1.08E-93 |
| Zc2hc1c  | 2.853973 | 4.17E-94 | 1.74E-93 |
| Gm17259  | 2.327692 | 3.69E-94 | 1.54E-93 |
| Ubxn11   | 2.603295 | 3.98E-94 | 1.66E-93 |
| Dym      | 1.243981 | 2.71E-94 | 1.14E-93 |
| Zfp810   | 1.52456  | 3.79E-94 | 1.59E-93 |
| 4732440D | 1.573443 | 4.14E-94 | 1.73E-93 |
| Zfp738   | 1.312242 | 3.93E-94 | 1.64E-93 |
| 6430511E | 1.920525 | 5.60E-94 | 2.33E-93 |
| Taf5     | 1.419807 | 4.68E-94 | 1.95E-93 |
| Pura     | 0.519935 | 5.28E-94 | 2.20E-93 |
| Gm15983  | 3.308576 | 1.14E-93 | 4.74E-93 |
| A930033H | 1.680216 | 5.94E-94 | 2.47E-93 |
| Nemf     | 0.773991 | 6.00E-94 | 2.50E-93 |
| Rnf113a1 | 1.956576 | 7.60E-94 | 3.16E-93 |
| Erg28    | 1.051173 | 8.33E-94 | 3.47E-93 |
| Gm17491  | 1.651062 | 9.89E-94 | 4.11E-93 |
| Gm11696  | 2.118798 | 1.23E-93 | 5.13E-93 |
| Ndfip1   | 0.540264 | 1.38E-93 | 5.73E-93 |
| Zmym4    | 0.832741 | 1.56E-93 | 6.50E-93 |
| Sdhaf4   | 0.893116 | 1.59E-93 | 6.60E-93 |
| Ogdh     | 0.734806 | 1.74E-93 | 7.23E-93 |
| Polr1has | 1.664067 | 2.27E-93 | 9.41E-93 |
| Cep44    | 1.440221 | 2.21E-93 | 9.16E-93 |
| Ankrd17  | 0.707875 | 3.39E-93 | 1.40E-92 |
| Cfap410  | 1.543204 | 3.61E-93 | 1.49E-92 |



|          |          |          |          |
|----------|----------|----------|----------|
| Mafg     | 0.894342 | 4.13E-93 | 1.71E-92 |
| Top1     | 0.60414  | 5.24E-93 | 2.17E-92 |
| H2bu2    | 0.769301 | 6.22E-93 | 2.57E-92 |
| Katnal2  | 3.019035 | 1.13E-92 | 4.68E-92 |
| Prpf31   | 1.111671 | 9.25E-93 | 3.82E-92 |
| Strada   | 1.493744 | 1.33E-92 | 5.48E-92 |
| Homer1   | 1.506562 | 1.38E-92 | 5.68E-92 |
| Lrguk    | 3.107463 | 2.62E-92 | 1.08E-91 |
| Ppp4r3a  | 0.869811 | 1.44E-92 | 5.96E-92 |
| Rsb1l    | 0.654983 | 1.95E-92 | 8.03E-92 |
| Unc13a   | 2.004721 | 2.47E-92 | 1.02E-91 |
| Bub1b    | 2.303548 | 3.23E-92 | 1.33E-91 |
| Bcl2     | 1.24708  | 3.05E-92 | 1.26E-91 |
| Fam133b  | 0.802879 | 3.60E-92 | 1.48E-91 |
| Zfp692   | 1.767456 | 4.83E-92 | 1.98E-91 |
| Ube2e3   | 0.690699 | 5.51E-92 | 2.26E-91 |
| Dusp7    | 0.80664  | 5.34E-92 | 2.19E-91 |
| Phf8     | 1.194926 | 5.24E-92 | 2.15E-91 |
| Tubb3    | 2.298694 | 1.10E-91 | 4.52E-91 |
| Tmem184  | 1.308106 | 8.21E-92 | 3.37E-91 |
| Ncbp2    | 0.984834 | 8.44E-92 | 3.46E-91 |
| Gal3st3  | 2.645815 | 1.50E-91 | 6.13E-91 |
| Klc2     | 1.463148 | 1.05E-91 | 4.28E-91 |
| Gm43597  | 1.960822 | 1.18E-91 | 4.81E-91 |
| Ipo8     | 1.04508  | 1.12E-91 | 4.59E-91 |
| Gps2     | 0.886808 | 1.35E-91 | 5.52E-91 |
| Mrpl34   | 0.86205  | 2.16E-91 | 8.84E-91 |
| Gm5460   | 3.592618 | 6.69E-91 | 2.72E-90 |
| Kcnab2   | 1.455223 | 2.61E-91 | 1.06E-90 |
| Vtn      | 0.64287  | 8.17E-91 | 3.33E-90 |
| 2610306V | 1.52944  | 5.24E-91 | 2.14E-90 |
| Rpf1     | 1.047857 | 5.58E-91 | 2.28E-90 |
| Rangrf   | 1.448733 | 6.28E-91 | 2.56E-90 |
| Plp1     | 2.083477 | 7.63E-91 | 3.11E-90 |
| Per3     | 0.887692 | 7.62E-91 | 3.10E-90 |
| Gm4065   | 3.025688 | 1.84E-90 | 7.45E-90 |
| Dcaf8    | 0.724311 | 1.27E-90 | 5.15E-90 |
| Gm32031  | 1.438513 | 1.31E-90 | 5.32E-90 |
| Zfp617   | 1.324765 | 1.39E-90 | 5.66E-90 |
| Limk2    | 1.1816   | 1.39E-90 | 5.67E-90 |
| 1810059H | 2.005238 | 2.11E-90 | 8.55E-90 |
| Smim7    | 0.848693 | 1.91E-90 | 7.75E-90 |
| Cnot3    | 0.90119  | 2.01E-90 | 8.17E-90 |
| 1600014C | 2.440155 | 2.84E-90 | 1.15E-89 |
| 4930430F | 1.465278 | 3.58E-90 | 1.45E-89 |
| 1700012D | 1.864133 | 4.11E-90 | 1.66E-89 |
| Dnal1    | 1.430435 | 3.51E-90 | 1.42E-89 |

|           |          |          |          |
|-----------|----------|----------|----------|
| Mfsd8     | 1.564761 | 4.28E-90 | 1.73E-89 |
| Rabl3     | 1.702266 | 6.99E-90 | 2.83E-89 |
| Cfap298   | 1.053241 | 6.77E-90 | 2.73E-89 |
| Hnrnpf    | 0.510262 | 8.81E-90 | 3.56E-89 |
| Naa15     | 0.837372 | 1.31E-89 | 5.31E-89 |
| Gm37742   | 3.376996 | 2.46E-89 | 9.89E-89 |
| Faxc      | 2.626771 | 1.75E-89 | 7.05E-89 |
| Ccdc63    | 2.613776 | 2.14E-89 | 8.62E-89 |
| Dclk1     | 1.995741 | 1.61E-89 | 6.51E-89 |
| Gfm2      | 1.564308 | 2.01E-89 | 8.09E-89 |
| Qrich1    | 1.000151 | 1.95E-89 | 7.84E-89 |
| Dnajc18   | 1.082712 | 2.13E-89 | 8.60E-89 |
| Dhps      | 0.985151 | 2.44E-89 | 9.81E-89 |
| Prrt1     | 1.543553 | 2.71E-89 | 1.09E-88 |
| D830036C  | 4.783448 | 1.09E-88 | 4.35E-88 |
| Gpank1    | 1.309821 | 3.95E-89 | 1.59E-88 |
| Map2k7    | 1.043171 | 3.88E-89 | 1.56E-88 |
| Sap30l    | 0.77723  | 4.72E-89 | 1.90E-88 |
| 1700028Kl | 3.247849 | 1.10E-88 | 4.42E-88 |
| Nfyb      | 0.878565 | 5.31E-89 | 2.13E-88 |
| Slc25a19  | 1.410098 | 6.82E-89 | 2.74E-88 |
| Npc1      | 1.05554  | 6.90E-89 | 2.77E-88 |
| Gngt2     | 0.991666 | 8.98E-89 | 3.60E-88 |
| Mrgbp     | 1.168151 | 9.39E-89 | 3.76E-88 |
| Wbp4      | 0.670903 | 1.05E-88 | 4.20E-88 |
| Hnrnpdl   | 0.613724 | 1.14E-88 | 4.55E-88 |
| Gpsm3     | 1.157106 | 1.07E-88 | 4.29E-88 |
| Mtmr7     | 1.664975 | 1.31E-88 | 5.24E-88 |
| 9330151L1 | 1.997505 | 1.64E-88 | 6.56E-88 |
| Gm45413   | 2.055161 | 1.73E-88 | 6.90E-88 |
| Tm7sf3    | 0.87079  | 1.57E-88 | 6.28E-88 |
| Zfp318    | 0.986505 | 1.56E-88 | 6.25E-88 |
| ldh3a     | 1.013804 | 1.87E-88 | 7.47E-88 |
| Tcea3     | 1.474885 | 2.35E-88 | 9.36E-88 |
| Sec61a2   | 1.308501 | 3.05E-88 | 1.22E-87 |
| Fnip2     | 1.092534 | 3.23E-88 | 1.29E-87 |
| 1110020A  | 2.121574 | 4.44E-88 | 1.77E-87 |
| Rnf32     | 2.434691 | 7.89E-88 | 3.13E-87 |
| Unc5a     | 2.766467 | 8.69E-88 | 3.45E-87 |
| Tarbp2    | 1.268152 | 6.00E-88 | 2.39E-87 |
| A530041M  | 2.023431 | 7.98E-88 | 3.17E-87 |
| Angel2    | 0.824816 | 6.55E-88 | 2.60E-87 |
| Slc25a35  | 1.981333 | 8.47E-88 | 3.36E-87 |
| Hcls1     | 1.930963 | 1.02E-87 | 4.05E-87 |
| Cldnd1    | 0.770374 | 9.59E-88 | 3.80E-87 |
| Sirt1     | 1.084401 | 1.07E-87 | 4.24E-87 |
| Fbxo36    | 2.195063 | 2.13E-87 | 8.40E-87 |

|          |          |          |          |
|----------|----------|----------|----------|
| 6230400D | 2.225558 | 2.27E-87 | 8.98E-87 |
| Wdr33    | 0.729619 | 1.91E-87 | 7.53E-87 |
| Gm16958  | 2.913047 | 3.86E-87 | 1.52E-86 |
| BC037032 | 2.571864 | 3.81E-87 | 1.50E-86 |
| H2bc6    | 1.815135 | 3.34E-87 | 1.32E-86 |
| Itch     | 0.744502 | 3.15E-87 | 1.24E-86 |
| Zfyve27  | 1.213101 | 3.30E-87 | 1.30E-86 |
| Smg1     | 0.770996 | 3.99E-87 | 1.57E-86 |
| Atp6v0c  | 0.506798 | 4.82E-87 | 1.90E-86 |
| Med25    | 1.078862 | 4.93E-87 | 1.94E-86 |
| Slc25a42 | 1.579699 | 5.51E-87 | 2.17E-86 |
| Traf3ip1 | 1.466388 | 5.68E-87 | 2.24E-86 |
| Nopchap1 | 1.184156 | 5.48E-87 | 2.16E-86 |
| Ivns1abp | 0.8055   | 6.94E-87 | 2.73E-86 |
| Tmem208  | 0.817768 | 8.86E-87 | 3.49E-86 |
| Cstf2t   | 1.108514 | 1.04E-86 | 4.10E-86 |
| Ifrd1    | 0.848705 | 1.07E-86 | 4.20E-86 |
| Slc25a12 | 1.094963 | 1.44E-86 | 5.66E-86 |
| Nicn1    | 1.089587 | 1.45E-86 | 5.69E-86 |
| Gm26910  | 2.006354 | 1.85E-86 | 7.27E-86 |
| Ggps1    | 0.833648 | 2.25E-86 | 8.81E-86 |
| Mtf1     | 1.104607 | 2.30E-86 | 9.04E-86 |
| Ttc30b   | 1.931361 | 2.56E-86 | 1.00E-85 |
| Itgae    | 2.945331 | 4.23E-86 | 1.65E-85 |
| Acss2    | 1.573167 | 2.64E-86 | 1.04E-85 |
| Ramp3    | 1.345837 | 2.83E-86 | 1.11E-85 |
| Tial1    | 0.801632 | 3.45E-86 | 1.35E-85 |
| Prr3     | 1.607114 | 3.97E-86 | 1.55E-85 |
| Rars2    | 1.574157 | 4.02E-86 | 1.57E-85 |
| Rev1     | 1.052673 | 4.04E-86 | 1.58E-85 |
| Yae1d1   | 0.901252 | 4.05E-86 | 1.59E-85 |
| Bbln     | 0.933956 | 4.62E-86 | 1.80E-85 |
| Nop58    | 0.945312 | 5.30E-86 | 2.07E-85 |
| Siah1a   | 0.87116  | 5.44E-86 | 2.12E-85 |
| Gm37320  | 2.248229 | 9.09E-86 | 3.55E-85 |
| Ptpn4    | 1.057833 | 7.21E-86 | 2.81E-85 |
| Slc16a3  | 1.682941 | 8.83E-86 | 3.45E-85 |
| Chchd7   | 0.855758 | 8.60E-86 | 3.36E-85 |
| Ptdss2   | 1.232835 | 8.78E-86 | 3.43E-85 |
| Gm48069  | 2.452985 | 1.52E-85 | 5.92E-85 |
| Blzf1    | 1.277964 | 9.67E-86 | 3.77E-85 |
| Gm49519  | 3.349615 | 2.01E-85 | 7.80E-85 |
| Ganc     | 1.219538 | 1.14E-85 | 4.45E-85 |
| Rffl     | 1.538902 | 1.20E-85 | 4.66E-85 |
| Zfp369   | 1.464664 | 1.23E-85 | 4.78E-85 |
| Ube4a    | 0.994434 | 1.53E-85 | 5.95E-85 |
| Gm46404  | 2.088645 | 2.07E-85 | 8.05E-85 |

|           |          |          |          |
|-----------|----------|----------|----------|
| Dmac2     | 1.288182 | 1.77E-85 | 6.88E-85 |
| Aasdhpt   | 1.090172 | 2.09E-85 | 8.10E-85 |
| Gm48236   | 3.140932 | 3.46E-85 | 1.34E-84 |
| Cnot4     | 0.760969 | 2.27E-85 | 8.82E-85 |
| Cnbd2     | 2.137478 | 3.50E-85 | 1.36E-84 |
| Cpt1a     | 0.73957  | 3.47E-85 | 1.35E-84 |
| Prmt5     | 1.249296 | 5.24E-85 | 2.03E-84 |
| Gm45902   | 2.086467 | 7.29E-85 | 2.82E-84 |
| Cngb3     | 2.73602  | 1.10E-84 | 4.25E-84 |
| Nectin1   | 1.381048 | 8.06E-85 | 3.12E-84 |
| 6030443JC | 2.937779 | 1.81E-84 | 6.99E-84 |
| Cyfp2     | 1.2773   | 1.11E-84 | 4.29E-84 |
| Comtd1    | 1.356731 | 1.35E-84 | 5.22E-84 |
| Gm15850   | 3.269075 | 2.63E-84 | 1.02E-83 |
| Zc3h15    | 0.701154 | 1.67E-84 | 6.46E-84 |
| A130010J1 | 1.470803 | 1.75E-84 | 6.77E-84 |
| Klhl9     | 0.758965 | 1.79E-84 | 6.90E-84 |
| Ccdc59    | 0.68113  | 2.32E-84 | 8.97E-84 |
| Ggct      | 1.589354 | 2.40E-84 | 9.27E-84 |
| Taz       | 0.909939 | 2.96E-84 | 1.14E-83 |
| Slc25a44  | 1.289009 | 3.29E-84 | 1.26E-83 |
| Tlk2      | 0.90904  | 3.47E-84 | 1.33E-83 |
| Trpm7     | 0.745763 | 3.55E-84 | 1.37E-83 |
| Gm47472   | 3.676029 | 1.00E-83 | 3.84E-83 |
| Trmt10a   | 1.551962 | 4.63E-84 | 1.78E-83 |
| Gm48608   | 3.615422 | 9.29E-84 | 3.56E-83 |
| C87436    | 1.132988 | 5.11E-84 | 1.96E-83 |
| Rwdd4a    | 1.052859 | 5.63E-84 | 2.16E-83 |
| Cox10     | 1.443691 | 6.58E-84 | 2.52E-83 |
| Mapk15    | 3.284781 | 1.40E-83 | 5.34E-83 |
| Ndufv3    | 0.581116 | 8.89E-84 | 3.41E-83 |
| Cep135    | 1.46788  | 9.27E-84 | 3.55E-83 |
| Gm12258   | 1.792884 | 1.08E-83 | 4.13E-83 |
| Krr1      | 0.956977 | 9.57E-84 | 3.67E-83 |
| Purg      | 1.497072 | 1.13E-83 | 4.33E-83 |
| Zc3h4     | 1.037458 | 1.13E-83 | 4.33E-83 |
| Dync1i2   | 0.570122 | 1.45E-83 | 5.55E-83 |
| Gm42615   | 3.777205 | 3.16E-83 | 1.20E-82 |
| Gm43857   | 2.295325 | 2.11E-83 | 8.07E-83 |
| Srcap     | 1.285096 | 1.92E-83 | 7.35E-83 |
| Ikzf5     | 0.883492 | 2.46E-83 | 9.37E-83 |
| Dand5     | 1.324131 | 2.62E-83 | 1.00E-82 |
| Xrn1      | 0.760466 | 2.74E-83 | 1.04E-82 |
| Atg4d     | 1.266271 | 2.82E-83 | 1.07E-82 |
| Snrnp27   | 0.705533 | 2.97E-83 | 1.13E-82 |
| 2310061I0 | 1.232684 | 3.19E-83 | 1.21E-82 |
| Cct5      | 0.63853  | 4.19E-83 | 1.59E-82 |

|          |          |          |          |
|----------|----------|----------|----------|
| R3hcc1l  | 1.246448 | 4.78E-83 | 1.82E-82 |
| Esrrg    | 1.910459 | 5.94E-83 | 2.26E-82 |
| Cspg5    | 0.971232 | 8.58E-83 | 3.26E-82 |
| Rundc3a  | 1.389743 | 1.16E-82 | 4.42E-82 |
| Rasal2   | 0.67433  | 1.46E-82 | 5.55E-82 |
| Gm48566  | 3.044351 | 2.72E-82 | 1.03E-81 |
| Vps13b   | 0.996083 | 2.08E-82 | 7.88E-82 |
| G730003C | 2.284204 | 2.71E-82 | 1.03E-81 |
| Mthfsl   | 1.252987 | 3.62E-82 | 1.37E-81 |
| Mier3    | 1.011763 | 3.67E-82 | 1.39E-81 |
| Jagn1    | 1.055034 | 4.09E-82 | 1.55E-81 |
| Cep41    | 2.057086 | 5.69E-82 | 2.15E-81 |
| 9430081H | 2.326657 | 6.75E-82 | 2.55E-81 |
| Flrt3    | 2.580345 | 8.77E-82 | 3.31E-81 |
| Banp     | 1.152575 | 7.85E-82 | 2.97E-81 |
| BC003965 | 0.904821 | 7.97E-82 | 3.01E-81 |
| Tmem38a  | 1.534524 | 1.04E-81 | 3.94E-81 |
| Mrpl41   | 0.800617 | 1.14E-81 | 4.29E-81 |
| Tnip2    | 1.290109 | 1.20E-81 | 4.52E-81 |
| Dera     | 1.649917 | 1.32E-81 | 4.98E-81 |
| Gm42555  | 3.483961 | 4.78E-81 | 1.80E-80 |
| Klhl23   | 1.061699 | 2.61E-81 | 9.82E-81 |
| Naf1     | 1.128995 | 4.24E-81 | 1.60E-80 |
| Chchd4   | 1.189066 | 4.99E-81 | 1.87E-80 |
| Zbtb44   | 0.870312 | 5.33E-81 | 2.00E-80 |
| Zfp458   | 1.694682 | 8.25E-81 | 3.10E-80 |
| Dlg2     | 1.330354 | 7.95E-81 | 2.99E-80 |
| Mterf1a  | 1.637571 | 9.55E-81 | 3.58E-80 |
| Atxn2l   | 0.851506 | 9.87E-81 | 3.71E-80 |
| Tead3    | 1.891885 | 1.26E-80 | 4.74E-80 |
| Gm38032  | 3.757315 | 3.10E-80 | 1.16E-79 |
| 1700119H | 2.684974 | 2.25E-80 | 8.42E-80 |
| Med4     | 0.879283 | 1.73E-80 | 6.50E-80 |
| Gm37902  | 2.350211 | 2.66E-80 | 9.93E-80 |
| Gm48768  | 2.00368  | 2.82E-80 | 1.06E-79 |
| Casc3    | 0.883978 | 2.41E-80 | 9.01E-80 |
| Clock    | 0.698585 | 2.73E-80 | 1.02E-79 |
| Csrp3    | 3.513938 | 6.23E-80 | 2.32E-79 |
| Gm42974  | 2.893341 | 5.94E-80 | 2.22E-79 |
| BC065403 | 2.97454  | 7.06E-80 | 2.63E-79 |
| Snapc3   | 1.123321 | 7.35E-80 | 2.74E-79 |
| Actr6    | 1.130234 | 7.65E-80 | 2.85E-79 |
| Gm26559  | 3.049177 | 1.30E-79 | 4.82E-79 |
| Lym7     | 1.460483 | 8.56E-80 | 3.19E-79 |
| Kpna1    | 0.904399 | 8.67E-80 | 3.23E-79 |
| Gm26621  | 1.697421 | 9.25E-80 | 3.44E-79 |
| Taf3     | 0.878742 | 9.40E-80 | 3.50E-79 |

|           |          |          |          |
|-----------|----------|----------|----------|
| 1700003E  | 2.610724 | 1.21E-79 | 4.51E-79 |
| Gpam      | 1.324127 | 1.01E-79 | 3.74E-79 |
| Rps6ka2   | 2.073224 | 1.18E-79 | 4.38E-79 |
| Zfp873    | 1.87597  | 1.21E-79 | 4.50E-79 |
| Rnf8      | 1.047194 | 1.10E-79 | 4.08E-79 |
| Tmem251   | 1.219286 | 1.23E-79 | 4.58E-79 |
| Alg11     | 1.215475 | 1.64E-79 | 6.09E-79 |
| Wdr75     | 1.160053 | 1.96E-79 | 7.25E-79 |
| 4933406J1 | 4.318478 | 5.23E-79 | 1.93E-78 |
| Ldah      | 1.070823 | 3.10E-79 | 1.15E-78 |
| 9930021JC | 0.745353 | 3.50E-79 | 1.30E-78 |
| Pigt      | 0.947264 | 3.98E-79 | 1.47E-78 |
| Mbd6      | 0.962811 | 5.08E-79 | 1.88E-78 |
| Ccdc89    | 3.198058 | 1.02E-78 | 3.76E-78 |
| Prpf18    | 1.006734 | 6.76E-79 | 2.50E-78 |
| Eno1      | 0.523991 | 1.36E-78 | 5.04E-78 |
| Slc35e4   | 1.123643 | 1.07E-78 | 3.94E-78 |
| Fam193b   | 0.930222 | 1.37E-78 | 5.04E-78 |
| 2610044O  | 1.386301 | 1.54E-78 | 5.67E-78 |
| Pithd1    | 1.047932 | 1.54E-78 | 5.67E-78 |
| Ccdc166   | 1.902924 | 1.87E-78 | 6.90E-78 |
| Chd6      | 0.646246 | 1.72E-78 | 6.34E-78 |
| Tug1      | 0.841087 | 1.78E-78 | 6.57E-78 |
| Ttc30a1   | 2.20099  | 2.48E-78 | 9.13E-78 |
| Pgap6     | 1.833807 | 2.63E-78 | 9.69E-78 |
| Ttc26     | 2.395886 | 3.25E-78 | 1.20E-77 |
| Metap1d   | 1.332598 | 3.01E-78 | 1.11E-77 |
| Prdm1     | 1.362845 | 3.75E-78 | 1.38E-77 |
| Tfdp1     | 1.3256   | 4.25E-78 | 1.56E-77 |
| Faap100   | 1.37784  | 4.46E-78 | 1.64E-77 |
| Alyref2   | 1.564661 | 5.17E-78 | 1.90E-77 |
| Zdhhc21   | 1.106872 | 5.02E-78 | 1.84E-77 |
| Pdcd7     | 1.052238 | 5.24E-78 | 1.92E-77 |
| 4932422N  | 2.443898 | 8.60E-78 | 3.15E-77 |
| Pigm      | 1.202227 | 5.67E-78 | 2.08E-77 |
| Prkaa2    | 1.519967 | 6.47E-78 | 2.37E-77 |
| Mapk8ip2  | 1.582727 | 6.87E-78 | 2.52E-77 |
| Fbxl15    | 1.330952 | 7.70E-78 | 2.82E-77 |
| Dnajc9    | 0.96648  | 8.47E-78 | 3.10E-77 |
| Rims3     | 2.006496 | 1.11E-77 | 4.07E-77 |
| Mdc1      | 1.24726  | 1.14E-77 | 4.18E-77 |
| Tmed1     | 1.184177 | 1.20E-77 | 4.38E-77 |
| Akt3      | 0.83283  | 1.21E-77 | 4.42E-77 |
| Tbp       | 1.227352 | 1.20E-77 | 4.39E-77 |
| Wac       | 0.621636 | 1.90E-77 | 6.94E-77 |
| Epb41l4ao | 0.955264 | 2.22E-77 | 8.09E-77 |
| Ogdhl     | 2.032543 | 2.67E-77 | 9.73E-77 |

|           |          |          |          |
|-----------|----------|----------|----------|
| Gm49156   | 2.614651 | 3.40E-77 | 1.24E-76 |
| Kif18a    | 2.313191 | 3.89E-77 | 1.41E-76 |
| A430033Kl | 1.52585  | 3.88E-77 | 1.41E-76 |
| A930024Ei | 1.896181 | 4.08E-77 | 1.48E-76 |
| Helq      | 1.791563 | 4.58E-77 | 1.67E-76 |
| Apobec2   | 2.886283 | 6.34E-77 | 2.30E-76 |
| Taf15     | 0.751427 | 4.65E-77 | 1.69E-76 |
| Ptpu      | 1.330987 | 5.18E-77 | 1.88E-76 |
| Atp5l     | 0.580088 | 5.73E-77 | 2.08E-76 |
| Suv39h1   | 1.502589 | 6.00E-77 | 2.18E-76 |
| Scap      | 1.053097 | 6.65E-77 | 2.41E-76 |
| Rbm28     | 0.871769 | 6.86E-77 | 2.49E-76 |
| Sdha      | 0.577545 | 7.66E-77 | 2.78E-76 |
| Gm17529   | 3.55895  | 1.58E-76 | 5.69E-76 |
| Slc20a1   | 1.090703 | 7.66E-77 | 2.78E-76 |
| Ptar1     | 0.855959 | 8.41E-77 | 3.05E-76 |
| Lats1     | 0.918982 | 1.06E-76 | 3.82E-76 |
| Bptf      | 0.517286 | 1.13E-76 | 4.10E-76 |
| Zfp157    | 1.177765 | 1.16E-76 | 4.20E-76 |
| Ehbp1     | 1.336066 | 1.24E-76 | 4.50E-76 |
| Ins15     | 2.929339 | 1.88E-76 | 6.78E-76 |
| Trp53inp2 | 0.8636   | 1.65E-76 | 5.95E-76 |
| Klhl28    | 1.003336 | 1.89E-76 | 6.81E-76 |
| Gm42463   | 3.128435 | 3.65E-76 | 1.32E-75 |
| Hif1an    | 1.107726 | 2.90E-76 | 1.05E-75 |
| Pigf      | 1.203583 | 3.21E-76 | 1.16E-75 |
| Nek4      | 1.321588 | 3.85E-76 | 1.39E-75 |
| Sfswap    | 0.78287  | 5.07E-76 | 1.82E-75 |
| Psmc3ip   | 1.971971 | 8.03E-76 | 2.89E-75 |
| Fam120a   | 0.660766 | 7.92E-76 | 2.85E-75 |
| Zfp961    | 1.529218 | 8.71E-76 | 3.13E-75 |
| H2ac6     | 1.996942 | 9.19E-76 | 3.30E-75 |
| Rfx3      | 1.254547 | 1.02E-75 | 3.65E-75 |
| Bicd1     | 1.210807 | 1.07E-75 | 3.82E-75 |
| Pdpc1     | 0.817727 | 1.23E-75 | 4.39E-75 |
| Decr2     | 1.326088 | 1.28E-75 | 4.60E-75 |
| Uqcrc1    | 0.662151 | 1.37E-75 | 4.89E-75 |
| Hnrnpa2b1 | 0.404065 | 2.09E-75 | 7.48E-75 |
| Herc4     | 0.919071 | 2.01E-75 | 7.18E-75 |
| Cops7b    | 1.402367 | 2.07E-75 | 7.40E-75 |
| Gm44812   | 3.120618 | 4.82E-75 | 1.72E-74 |
| Heatr6    | 1.07057  | 2.67E-75 | 9.56E-75 |
| Trmt12    | 1.653467 | 3.07E-75 | 1.10E-74 |
| Otud4     | 0.809465 | 3.52E-75 | 1.26E-74 |
| Rd3l      | 1.318434 | 4.21E-75 | 1.50E-74 |
| Zfp799    | 1.531814 | 4.82E-75 | 1.72E-74 |
| Hpfl      | 0.710484 | 4.83E-75 | 1.72E-74 |

|            |          |          |          |
|------------|----------|----------|----------|
| Zfp641     | 2.220842 | 5.99E-75 | 2.13E-74 |
| Nfrkb      | 1.067685 | 5.99E-75 | 2.13E-74 |
| Tdg        | 1.166194 | 6.45E-75 | 2.30E-74 |
| Zfp763     | 1.517564 | 7.03E-75 | 2.50E-74 |
| Btbd9      | 0.924297 | 7.25E-75 | 2.58E-74 |
| Zswim1     | 1.534739 | 1.04E-74 | 3.68E-74 |
| Rps6kb2    | 1.159587 | 1.08E-74 | 3.85E-74 |
| Mmd2       | 1.124845 | 1.09E-74 | 3.87E-74 |
| Gm43528    | 3.01694  | 1.76E-74 | 6.25E-74 |
| Usp15      | 0.809682 | 1.56E-74 | 5.54E-74 |
| Lysmd3     | 0.934467 | 1.72E-74 | 6.11E-74 |
| Gm42843    | 1.934333 | 2.40E-74 | 8.51E-74 |
| Gm49706    | 2.163138 | 2.57E-74 | 9.10E-74 |
| Dlg1       | 0.87085  | 2.54E-74 | 8.99E-74 |
| Gm37258    | 2.336582 | 5.01E-74 | 1.77E-73 |
| Ccdc157    | 1.29417  | 4.19E-74 | 1.48E-73 |
| Gm15417    | 1.151871 | 4.15E-74 | 1.47E-73 |
| D630023F   | 2.650935 | 6.01E-74 | 2.13E-73 |
| Gm42942    | 2.947731 | 7.61E-74 | 2.69E-73 |
| Psm3       | 0.519683 | 5.10E-74 | 1.81E-73 |
| Zfhx2      | 1.390633 | 5.25E-74 | 1.86E-73 |
| Katnbl1    | 0.942489 | 5.69E-74 | 2.01E-73 |
| Atp5mpl    | 0.523321 | 6.86E-74 | 2.42E-73 |
| Thyn1      | 1.113854 | 7.87E-74 | 2.78E-73 |
| Esf1       | 0.689189 | 9.42E-74 | 3.33E-73 |
| Pbrm1      | 0.53096  | 1.14E-73 | 4.03E-73 |
| Gm47438    | 2.908403 | 1.74E-73 | 6.14E-73 |
| Lsm11      | 1.496027 | 1.30E-73 | 4.58E-73 |
| Gtf3c2     | 0.829765 | 1.38E-73 | 4.87E-73 |
| Tmem231    | 2.001286 | 1.92E-73 | 6.77E-73 |
| Nop56      | 1.049829 | 1.80E-73 | 6.33E-73 |
| Cwc25      | 0.941128 | 1.82E-73 | 6.41E-73 |
| Carmil1    | 1.154389 | 1.83E-73 | 6.42E-73 |
| Rbbp6      | 0.544506 | 2.35E-73 | 8.27E-73 |
| 5430405H   | 1.286604 | 2.31E-73 | 8.13E-73 |
| Mir181a-1  | 2.025153 | 2.77E-73 | 9.72E-73 |
| Snrnp48    | 0.715799 | 2.87E-73 | 1.01E-72 |
| Togaram1   | 0.958028 | 3.11E-73 | 1.09E-72 |
| Gm37706    | 1.628749 | 3.49E-73 | 1.22E-72 |
| Bola1      | 0.981854 | 3.47E-73 | 1.22E-72 |
| Cycs       | 0.676032 | 3.75E-73 | 1.31E-72 |
| Uqcc1      | 1.195829 | 4.02E-73 | 1.41E-72 |
| Ndufv1     | 0.684118 | 4.15E-73 | 1.45E-72 |
| Ptpmt1     | 0.841945 | 4.18E-73 | 1.47E-72 |
| Rce1       | 0.974933 | 4.46E-73 | 1.57E-72 |
| Csgalnact2 | 0.990557 | 5.44E-73 | 1.91E-72 |
| Umad1      | 1.607591 | 6.74E-73 | 2.36E-72 |



|          |          |          |          |
|----------|----------|----------|----------|
| Dlat     | 0.965052 | 7.10E-73 | 2.49E-72 |
| Gm37626  | 1.62419  | 7.85E-73 | 2.75E-72 |
| Mars2    | 1.735673 | 1.03E-72 | 3.62E-72 |
| AW20949  | 1.30128  | 9.96E-73 | 3.48E-72 |
| Skp2     | 1.924026 | 1.14E-72 | 3.98E-72 |
| Gkap1    | 0.690179 | 1.41E-72 | 4.93E-72 |
| Usp48    | 0.862409 | 1.37E-72 | 4.80E-72 |
| Ndufs1   | 0.880756 | 1.57E-72 | 5.47E-72 |
| Zfp830   | 1.057056 | 1.64E-72 | 5.73E-72 |
| Cdc34    | 1.03245  | 1.77E-72 | 6.17E-72 |
| Zfp719   | 1.52013  | 1.82E-72 | 6.34E-72 |
| Pigh     | 1.334046 | 2.01E-72 | 7.02E-72 |
| Snx25    | 1.275521 | 1.91E-72 | 6.65E-72 |
| Rabggtb  | 0.94679  | 2.13E-72 | 7.42E-72 |
| Kifbp    | 0.855946 | 2.39E-72 | 8.31E-72 |
| Casp8ap2 | 0.878698 | 3.21E-72 | 1.12E-71 |
| Zfp420   | 1.613962 | 5.01E-72 | 1.74E-71 |
| Gm44567  | 1.605146 | 5.18E-72 | 1.80E-71 |
| Sec24a   | 1.143911 | 5.30E-72 | 1.84E-71 |
| Gm7598   | 3.093937 | 8.14E-72 | 2.83E-71 |
| Gm33843  | 3.490689 | 1.00E-71 | 3.48E-71 |
| Shprh    | 0.907743 | 5.78E-72 | 2.01E-71 |
| Zfp1     | 1.288371 | 6.12E-72 | 2.13E-71 |
| Gm43362  | 0.966859 | 6.47E-72 | 2.25E-71 |
| Aktip    | 0.72444  | 6.89E-72 | 2.39E-71 |
| Wdr70    | 1.07518  | 9.77E-72 | 3.39E-71 |
| Smn1     | 0.978206 | 1.08E-71 | 3.76E-71 |
| Ints2    | 1.383396 | 1.19E-71 | 4.11E-71 |
| Rhbdl3   | 2.128521 | 1.36E-71 | 4.72E-71 |
| Gm9013   | 3.677092 | 2.30E-71 | 7.95E-71 |
| Gm42648  | 2.688304 | 2.06E-71 | 7.14E-71 |
| 49334210 | 1.510988 | 1.58E-71 | 5.47E-71 |
| Yeats4   | 0.848175 | 1.65E-71 | 5.70E-71 |
| BC065397 | 2.019958 | 2.36E-71 | 8.16E-71 |
| Tmem17   | 2.227959 | 2.47E-71 | 8.55E-71 |
| Zfp523   | 1.166804 | 2.05E-71 | 7.11E-71 |
| Ppwd1    | 0.980906 | 2.07E-71 | 7.18E-71 |
| Gm16196  | 2.391637 | 2.83E-71 | 9.79E-71 |
| Tacc2    | 1.072995 | 2.39E-71 | 8.26E-71 |
| Bcat1    | 0.911915 | 2.65E-71 | 9.15E-71 |
| Atr      | 1.163418 | 2.70E-71 | 9.34E-71 |
| Adcy6    | 0.927977 | 2.82E-71 | 9.73E-71 |
| Trp53bp1 | 1.038964 | 2.92E-71 | 1.01E-70 |
| Mkks     | 1.41178  | 3.70E-71 | 1.28E-70 |
| MIlf2    | 0.54763  | 3.95E-71 | 1.36E-70 |
| R3hdm2   | 0.563104 | 3.90E-71 | 1.34E-70 |
| Bdp1     | 0.758805 | 4.07E-71 | 1.40E-70 |

|          |          |          |          |
|----------|----------|----------|----------|
| Ssb      | 0.498694 | 4.44E-71 | 1.53E-70 |
| Appl1    | 0.718148 | 4.34E-71 | 1.49E-70 |
| Usp37    | 1.004696 | 4.65E-71 | 1.60E-70 |
| Nup98    | 0.849484 | 5.10E-71 | 1.76E-70 |
| Fto      | 0.729075 | 6.43E-71 | 2.21E-70 |
| Pih1d2   | 2.3699   | 7.46E-71 | 2.57E-70 |
| Gm16754  | 2.260618 | 8.63E-71 | 2.97E-70 |
| Htt      | 0.939994 | 8.14E-71 | 2.80E-70 |
| Rnf126   | 1.167175 | 9.42E-71 | 3.24E-70 |
| Usp49    | 1.787954 | 1.14E-70 | 3.91E-70 |
| Maco1    | 0.723741 | 1.07E-70 | 3.68E-70 |
| Gm37298  | 1.495862 | 1.26E-70 | 4.34E-70 |
| 0610030E | 0.915205 | 1.45E-70 | 4.97E-70 |
| Tgm4     | 3.158698 | 2.37E-70 | 8.10E-70 |
| Ice2     | 1.317816 | 1.62E-70 | 5.56E-70 |
| Sv2c     | 3.052098 | 2.42E-70 | 8.28E-70 |
| Dyrk1a   | 0.899452 | 1.81E-70 | 6.19E-70 |
| Wdr54    | 1.871689 | 1.86E-70 | 6.37E-70 |
| Ezh2     | 1.141677 | 1.84E-70 | 6.31E-70 |
| Slc25a28 | 0.89889  | 1.93E-70 | 6.62E-70 |
| Gga3     | 1.285925 | 1.99E-70 | 6.81E-70 |
| Large1   | 1.341176 | 2.02E-70 | 6.92E-70 |
| Racgap1  | 2.279529 | 2.23E-70 | 7.62E-70 |
| Ccdc127  | 0.79172  | 2.21E-70 | 7.56E-70 |
| Cep162   | 1.17072  | 2.24E-70 | 7.65E-70 |
| Gm49024  | 2.997964 | 3.52E-70 | 1.20E-69 |
| Man1a2   | 0.686311 | 2.82E-70 | 9.65E-70 |
| Pdhx     | 1.177723 | 2.85E-70 | 9.73E-70 |
| Mterf4   | 1.357197 | 3.07E-70 | 1.05E-69 |
| Thnsl1   | 1.802783 | 3.83E-70 | 1.31E-69 |
| Gm43006  | 2.430116 | 4.66E-70 | 1.59E-69 |
| Zfp61    | 1.553814 | 4.08E-70 | 1.39E-69 |
| Narf     | 0.967143 | 6.45E-70 | 2.20E-69 |
| Zfp113   | 1.379825 | 7.08E-70 | 2.41E-69 |
| Zbtb26   | 1.547974 | 9.08E-70 | 3.09E-69 |
| Pikfyve  | 1.004041 | 8.61E-70 | 2.93E-69 |
| MIst8    | 1.469011 | 8.90E-70 | 3.03E-69 |
| Polb     | 0.80415  | 8.88E-70 | 3.02E-69 |
| Dhrs3    | 0.703902 | 9.14E-70 | 3.11E-69 |
| H4c3     | 2.287131 | 1.11E-69 | 3.78E-69 |
| Pcmt1    | 0.652414 | 9.52E-70 | 3.23E-69 |
| Xpo1     | 0.778372 | 1.00E-69 | 3.41E-69 |
| Rdh8     | 3.460842 | 1.89E-69 | 6.39E-69 |
| Abcc1    | 1.288704 | 1.15E-69 | 3.91E-69 |
| Cdk20    | 1.752233 | 1.28E-69 | 4.34E-69 |
| Clk1     | 0.525502 | 1.38E-69 | 4.69E-69 |
| Nsd2     | 0.862326 | 1.34E-69 | 4.56E-69 |

|          |          |          |          |
|----------|----------|----------|----------|
| Ankrd54  | 1.208792 | 1.41E-69 | 4.77E-69 |
| Abraxas1 | 1.613595 | 1.66E-69 | 5.62E-69 |
| Ralgps1  | 1.216388 | 1.68E-69 | 5.70E-69 |
| Pdzd8    | 0.817613 | 1.75E-69 | 5.92E-69 |
| Usp21    | 1.304373 | 1.80E-69 | 6.10E-69 |
| Gm43751  | 2.576686 | 3.24E-69 | 1.09E-68 |
| Dedd2    | 1.333161 | 2.69E-69 | 9.10E-69 |
| Anapc10  | 0.995336 | 2.96E-69 | 1.00E-68 |
| Slc38a6  | 1.269684 | 3.04E-69 | 1.03E-68 |
| Gm29666  | 2.531137 | 4.04E-69 | 1.36E-68 |
| Atp5g3   | 0.508425 | 3.80E-69 | 1.28E-68 |
| Pus3     | 1.52526  | 4.15E-69 | 1.40E-68 |
| 4930509H | 1.575613 | 4.42E-69 | 1.49E-68 |
| 2610001A | 2.79783  | 6.72E-69 | 2.26E-68 |
| Ttf1     | 1.017904 | 5.42E-69 | 1.83E-68 |
| Gtpbp4   | 0.763625 | 5.51E-69 | 1.86E-68 |
| Eid2     | 0.946934 | 5.71E-69 | 1.92E-68 |
| 1700018L | 2.152892 | 6.90E-69 | 2.32E-68 |
| Wdfy2    | 1.277539 | 6.25E-69 | 2.11E-68 |
| Wdr90    | 1.840049 | 6.60E-69 | 2.22E-68 |
| Ccdc77   | 1.379885 | 7.66E-69 | 2.57E-68 |
| Trappc6b | 0.583563 | 8.53E-69 | 2.87E-68 |
| Gm42514  | 2.302571 | 1.07E-68 | 3.61E-68 |
| Ccdc163  | 1.474609 | 1.10E-68 | 3.70E-68 |
| Snhg15   | 1.692622 | 1.72E-68 | 5.77E-68 |
| Emc8     | 0.788715 | 1.73E-68 | 5.79E-68 |
| 4930595L | 3.482666 | 2.98E-68 | 9.99E-68 |
| Atrip    | 1.352532 | 1.96E-68 | 6.58E-68 |
| Gm43788  | 1.492238 | 2.65E-68 | 8.86E-68 |
| Pik3r1   | 0.621181 | 3.08E-68 | 1.03E-67 |
| Gm16262  | 3.738921 | 5.59E-68 | 1.87E-67 |
| 3110021N | 1.572551 | 3.30E-68 | 1.11E-67 |
| Ppm1h    | 1.034816 | 3.27E-68 | 1.09E-67 |
| Gm16982  | 3.631625 | 6.52E-68 | 2.18E-67 |
| Ckap5    | 0.646164 | 4.73E-68 | 1.58E-67 |
| Ngrn     | 0.868609 | 5.03E-68 | 1.68E-67 |
| Pes1     | 1.060175 | 5.81E-68 | 1.94E-67 |
| Kansl2   | 0.984257 | 8.03E-68 | 2.68E-67 |
| Zbed4    | 1.60903  | 9.15E-68 | 3.05E-67 |
| 2810402E | 1.391698 | 1.01E-67 | 3.37E-67 |
| Pyurf    | 1.149911 | 1.13E-67 | 3.77E-67 |
| Gm47572  | 3.135746 | 1.83E-67 | 6.10E-67 |
| Gm29358  | 2.415488 | 1.77E-67 | 5.88E-67 |
| Gm45159  | 1.633629 | 1.50E-67 | 5.00E-67 |
| Ttc5     | 0.870404 | 1.50E-67 | 5.00E-67 |
| Tex15    | 2.919434 | 2.04E-67 | 6.78E-67 |
| Caprin2  | 1.907013 | 1.88E-67 | 6.26E-67 |

|           |          |          |          |
|-----------|----------|----------|----------|
| F8        | 2.459854 | 2.28E-67 | 7.57E-67 |
| A930004D  | 1.724844 | 2.30E-67 | 7.64E-67 |
| Gm49705   | 2.001805 | 2.44E-67 | 8.11E-67 |
| Tob1      | 0.602372 | 2.69E-67 | 8.94E-67 |
| Rbm6      | 0.714413 | 3.58E-67 | 1.19E-66 |
| Sall2     | 1.28466  | 3.86E-67 | 1.28E-66 |
| Rcor3     | 0.85095  | 5.35E-67 | 1.77E-66 |
| Senp5     | 1.039823 | 5.95E-67 | 1.97E-66 |
| Ap3s2     | 1.088282 | 6.13E-67 | 2.03E-66 |
| Gm49640   | 4.295766 | 1.17E-66 | 3.86E-66 |
| Mns1      | 2.926305 | 9.88E-67 | 3.27E-66 |
| Actr3b    | 2.064281 | 8.57E-67 | 2.83E-66 |
| Tcf24     | 2.1124   | 1.07E-66 | 3.53E-66 |
| Tatdn1    | 1.219429 | 1.01E-66 | 3.33E-66 |
| Trub2     | 1.476064 | 1.04E-66 | 3.44E-66 |
| Gm26782   | 1.166971 | 1.19E-66 | 3.91E-66 |
| H2az2     | 0.473533 | 1.34E-66 | 4.43E-66 |
| Faf2      | 0.809382 | 1.28E-66 | 4.21E-66 |
| Fbxl16    | 1.477618 | 1.37E-66 | 4.53E-66 |
| Haus8     | 1.447897 | 1.43E-66 | 4.71E-66 |
| Stk36     | 2.266401 | 1.74E-66 | 5.74E-66 |
| Gm15489   | 3.55014  | 3.24E-66 | 1.07E-65 |
| Selenoi   | 1.14581  | 2.38E-66 | 7.85E-66 |
| Gm36371   | 2.435211 | 3.33E-66 | 1.10E-65 |
| Ttc21b    | 1.430181 | 3.09E-66 | 1.02E-65 |
| A93000711 | 2.648582 | 4.21E-66 | 1.38E-65 |
| Prkab2    | 1.308491 | 3.66E-66 | 1.20E-65 |
| Orai2     | 2.060689 | 4.04E-66 | 1.33E-65 |
| Hnrnpd    | 0.516692 | 4.57E-66 | 1.50E-65 |
| Atxn7l3b  | 0.452991 | 4.82E-66 | 1.58E-65 |
| Spast     | 0.914215 | 4.56E-66 | 1.50E-65 |
| Hagh      | 0.762997 | 4.83E-66 | 1.59E-65 |
| Zc3h3     | 1.41837  | 5.61E-66 | 1.84E-65 |
| Gm38120   | 1.778057 | 5.98E-66 | 1.96E-65 |
| Gm47512   | 2.274375 | 8.05E-66 | 2.64E-65 |
| Get1      | 1.207536 | 7.41E-66 | 2.43E-65 |
| Mktn1     | 0.786326 | 7.74E-66 | 2.54E-65 |
| Spef2     | 3.202231 | 1.16E-65 | 3.80E-65 |
| Tmem181i  | 1.15188  | 8.01E-66 | 2.62E-65 |
| Sema4b    | 1.957065 | 9.30E-66 | 3.04E-65 |
| Ccdc181   | 1.396379 | 8.77E-66 | 2.87E-65 |
| Dcc       | 2.30074  | 1.11E-65 | 3.61E-65 |
| Farp2     | 1.711794 | 1.21E-65 | 3.95E-65 |
| Thoc1     | 0.83318  | 1.26E-65 | 4.12E-65 |
| Ppp6r3    | 0.664272 | 1.36E-65 | 4.45E-65 |
| Dnm1l     | 0.726385 | 1.40E-65 | 4.58E-65 |
| Safb2     | 0.73776  | 1.49E-65 | 4.86E-65 |

|           |          |          |          |
|-----------|----------|----------|----------|
| Gm5617    | 1.100394 | 1.99E-65 | 6.47E-65 |
| Sf1       | 0.628373 | 2.17E-65 | 7.07E-65 |
| Ascc1     | 1.06104  | 2.16E-65 | 7.04E-65 |
| Mkrn3     | 2.175722 | 2.59E-65 | 8.43E-65 |
| Gba2      | 1.551268 | 2.72E-65 | 8.84E-65 |
| Zkscan8   | 1.096078 | 2.66E-65 | 8.65E-65 |
| Pibf1     | 1.02023  | 2.95E-65 | 9.60E-65 |
| Bst1      | 2.573144 | 4.10E-65 | 1.33E-64 |
| Pou6f1    | 1.19633  | 3.55E-65 | 1.16E-64 |
| Rpl29-ps2 | 3.205609 | 6.86E-65 | 2.23E-64 |
| Arsg      | 2.390813 | 5.67E-65 | 1.84E-64 |
| Kbtbd3    | 1.19054  | 5.72E-65 | 1.85E-64 |
| Flvcr1    | 1.4645   | 7.13E-65 | 2.31E-64 |
| Ermard    | 1.383227 | 7.13E-65 | 2.31E-64 |
| Gm49336   | 1.025093 | 7.03E-65 | 2.28E-64 |
| Gin1      | 1.260502 | 7.37E-65 | 2.39E-64 |
| Plxnb1    | 0.968833 | 8.20E-65 | 2.66E-64 |
| A930002C  | 4.342242 | 2.22E-64 | 7.18E-64 |
| Wdr77     | 1.270597 | 1.24E-64 | 4.00E-64 |
| Cntrob    | 2.056755 | 1.63E-64 | 5.28E-64 |
| Zfp938    | 1.070465 | 1.39E-64 | 4.48E-64 |
| Unc45a    | 0.933821 | 1.62E-64 | 5.23E-64 |
| Pold3     | 1.071317 | 1.98E-64 | 6.40E-64 |
| Mks1      | 1.934601 | 2.64E-64 | 8.51E-64 |
| Shisa4    | 0.982147 | 2.56E-64 | 8.26E-64 |
| 5730455P  | 0.987614 | 2.62E-64 | 8.47E-64 |
| Dync2li1  | 1.359471 | 2.73E-64 | 8.80E-64 |
| Gm43231   | 2.465374 | 3.71E-64 | 1.20E-63 |
| Mrps22    | 1.294993 | 3.61E-64 | 1.16E-63 |
| 2900093K  | 1.305515 | 4.33E-64 | 1.39E-63 |
| BC002059  | 1.459801 | 4.60E-64 | 1.48E-63 |
| Armc8     | 0.831478 | 4.49E-64 | 1.45E-63 |
| Map3k13   | 1.744181 | 4.63E-64 | 1.49E-63 |
| Gm43588   | 2.461635 | 7.01E-64 | 2.25E-63 |
| D130007C  | 2.452097 | 7.79E-64 | 2.51E-63 |
| Cdk19     | 0.611702 | 7.56E-64 | 2.43E-63 |
| Rictor    | 0.605893 | 8.76E-64 | 2.82E-63 |
| Slc44a1   | 0.665166 | 9.57E-64 | 3.08E-63 |
| Tyro3     | 2.13674  | 1.10E-63 | 3.55E-63 |
| Tmem199   | 1.179292 | 1.16E-63 | 3.73E-63 |
| Zfp78     | 1.999031 | 1.42E-63 | 4.56E-63 |
| Ggt7      | 1.579275 | 1.42E-63 | 4.55E-63 |
| B9d1      | 1.363512 | 1.52E-63 | 4.86E-63 |
| Gm42801   | 4.469356 | 3.28E-63 | 1.05E-62 |
| Kansl1    | 0.630276 | 1.86E-63 | 5.97E-63 |
| Cenpc1    | 1.107367 | 2.12E-63 | 6.78E-63 |
| Rpl32l    | 2.050304 | 2.82E-63 | 9.03E-63 |

|           |          |          |          |
|-----------|----------|----------|----------|
| Zfp62     | 0.876965 | 2.71E-63 | 8.68E-63 |
| Gm43760   | 4.686633 | 5.67E-63 | 1.81E-62 |
| Dennd4a   | 0.970224 | 3.29E-63 | 1.05E-62 |
| Gm9958    | 2.349512 | 4.49E-63 | 1.44E-62 |
| Pan2      | 1.053273 | 4.02E-63 | 1.28E-62 |
| B4galt2   | 1.426628 | 4.22E-63 | 1.35E-62 |
| H3f3a     | 0.316731 | 4.71E-63 | 1.51E-62 |
| Ccnh      | 0.840722 | 4.55E-63 | 1.45E-62 |
| Ist1      | 0.812525 | 4.83E-63 | 1.54E-62 |
| Gm5113    | 1.785625 | 5.60E-63 | 1.79E-62 |
| Baz1b     | 0.588892 | 5.52E-63 | 1.76E-62 |
| D130019J1 | 1.597256 | 5.96E-63 | 1.90E-62 |
| Pomt2     | 1.2883   | 6.44E-63 | 2.05E-62 |
| Cbll1     | 0.838356 | 6.49E-63 | 2.07E-62 |
| Gm16141   | 3.014134 | 1.01E-62 | 3.21E-62 |
| Safb      | 0.67653  | 7.03E-63 | 2.24E-62 |
| Zan       | 2.701818 | 9.47E-63 | 3.02E-62 |
| Ssbp1     | 0.771664 | 7.28E-63 | 2.32E-62 |
| Rmnd5b    | 0.972844 | 9.53E-63 | 3.03E-62 |
| Slx4ip    | 1.530278 | 1.18E-62 | 3.74E-62 |
| Gm48369   | 2.542532 | 1.50E-62 | 4.76E-62 |
| Tuba4a    | 1.22194  | 1.43E-62 | 4.54E-62 |
| Lclat1    | 1.190237 | 1.50E-62 | 4.78E-62 |
| Gm13112   | 4.198133 | 2.61E-62 | 8.27E-62 |
| Yipf5     | 0.754143 | 1.57E-62 | 5.00E-62 |
| Sfi1      | 1.589825 | 2.43E-62 | 7.70E-62 |
| Gm15481   | 2.414944 | 4.42E-62 | 1.40E-61 |
| Smpd1     | 0.840967 | 3.36E-62 | 1.07E-61 |
| H3c15     | 2.056327 | 3.75E-62 | 1.19E-61 |
| Camk1g    | 3.175468 | 4.62E-62 | 1.46E-61 |
| Diablo    | 0.896322 | 3.68E-62 | 1.17E-61 |
| 2700049A  | 1.221879 | 3.80E-62 | 1.20E-61 |
| Gm33195   | 2.066319 | 4.39E-62 | 1.39E-61 |
| Ccdc14    | 1.729836 | 4.32E-62 | 1.37E-61 |
| Chd2      | 0.698628 | 4.26E-62 | 1.35E-61 |
| Castor2   | 1.089014 | 4.89E-62 | 1.55E-61 |
| Kmt2e     | 0.419222 | 5.49E-62 | 1.73E-61 |
| A330074K  | 2.139523 | 5.81E-62 | 1.84E-61 |
| Naa20     | 0.699334 | 5.99E-62 | 1.89E-61 |
| 2510002D  | 0.782587 | 5.96E-62 | 1.88E-61 |
| Gstcd     | 1.55579  | 6.04E-62 | 1.91E-61 |
| Aloxe3    | 2.900764 | 8.11E-62 | 2.56E-61 |
| Tmem41b   | 0.959726 | 6.58E-62 | 2.08E-61 |
| Gtf3c3    | 1.086029 | 6.99E-62 | 2.20E-61 |
| Snx14     | 1.024366 | 9.46E-62 | 2.98E-61 |
| 4930570G  | 1.858591 | 9.75E-62 | 3.07E-61 |
| Scai      | 0.928505 | 1.00E-61 | 3.15E-61 |

|           |          |          |          |
|-----------|----------|----------|----------|
| E230001N  | 2.262091 | 1.39E-61 | 4.35E-61 |
| Tasor2    | 0.886014 | 1.09E-61 | 3.44E-61 |
| Zfp866    | 1.279957 | 1.11E-61 | 3.50E-61 |
| Tmsb15b2  | 2.193612 | 1.31E-61 | 4.10E-61 |
| Slc8a3    | 1.711922 | 1.31E-61 | 4.11E-61 |
| Brca2     | 1.512353 | 1.44E-61 | 4.52E-61 |
| Dhx8      | 0.965865 | 1.46E-61 | 4.59E-61 |
| 2900022M  | 1.952167 | 1.84E-61 | 5.76E-61 |
| Klhdc2    | 0.82696  | 1.75E-61 | 5.51E-61 |
| Marchf7   | 0.578342 | 1.87E-61 | 5.86E-61 |
| Pcm1      | 0.538965 | 2.62E-61 | 8.23E-61 |
| Prkrip1   | 0.984285 | 2.68E-61 | 8.41E-61 |
| Dyrk1b    | 1.367724 | 3.07E-61 | 9.63E-61 |
| Arv1      | 2.017613 | 3.58E-61 | 1.12E-60 |
| Fktn      | 0.938442 | 3.34E-61 | 1.05E-60 |
| 2210408I2 | 1.662979 | 3.79E-61 | 1.18E-60 |
| Letm2     | 0.976221 | 4.75E-61 | 1.49E-60 |
| Tmx2      | 0.85141  | 4.77E-61 | 1.49E-60 |
| Mzf1      | 2.430118 | 5.24E-61 | 1.64E-60 |
| Pwwp2a    | 0.76682  | 5.53E-61 | 1.73E-60 |
| Ufl1      | 0.729542 | 5.65E-61 | 1.76E-60 |
| Al463170  | 3.190046 | 8.42E-61 | 2.63E-60 |
| Rc3h2     | 0.630609 | 6.24E-61 | 1.95E-60 |
| 4930405A  | 2.512688 | 6.56E-61 | 2.05E-60 |
| Rab3ip    | 1.105046 | 6.39E-61 | 2.00E-60 |
| Agbl3     | 1.290333 | 6.46E-61 | 2.02E-60 |
| Uap1      | 0.816348 | 6.65E-61 | 2.08E-60 |
| Gm10033   | 1.072331 | 6.79E-61 | 2.12E-60 |
| Dhrs13    | 2.080349 | 7.63E-61 | 2.38E-60 |
| Kif3a     | 0.952811 | 9.17E-61 | 2.86E-60 |
| Lrrc57    | 1.072041 | 9.67E-61 | 3.01E-60 |
| Polr3f    | 0.948973 | 1.21E-60 | 3.75E-60 |
| Dido1     | 0.735179 | 1.24E-60 | 3.87E-60 |
| Mapk9     | 0.805613 | 1.28E-60 | 3.97E-60 |
| Nup155    | 1.199646 | 1.28E-60 | 3.99E-60 |
| Gm28424   | 2.983116 | 1.85E-60 | 5.74E-60 |
| Mktn2os   | 3.422367 | 2.04E-60 | 6.32E-60 |
| Pcgf1     | 1.440606 | 1.51E-60 | 4.70E-60 |
| Ccdc51    | 1.560445 | 1.63E-60 | 5.06E-60 |
| Brd8dc    | 1.998296 | 1.72E-60 | 5.34E-60 |
| Jmjd6     | 0.737759 | 1.62E-60 | 5.04E-60 |
| Ppp1r16a  | 1.278599 | 1.97E-60 | 6.12E-60 |
| Nr2c2     | 0.769129 | 1.99E-60 | 6.19E-60 |
| Mkln1     | 0.515874 | 2.06E-60 | 6.41E-60 |
| Taf7      | 0.781877 | 2.14E-60 | 6.64E-60 |
| lqce      | 1.45214  | 2.22E-60 | 6.89E-60 |
| Ttc9c     | 1.068063 | 2.36E-60 | 7.31E-60 |

|           |          |          |          |
|-----------|----------|----------|----------|
| Rnf10     | 0.530355 | 2.71E-60 | 8.41E-60 |
| 4930405J1 | 3.697218 | 3.81E-60 | 1.18E-59 |
| D330050I1 | 1.832046 | 2.98E-60 | 9.24E-60 |
| Akirin2   | 0.66219  | 2.84E-60 | 8.81E-60 |
| Gm43696   | 1.422879 | 3.59E-60 | 1.11E-59 |
| Gm49300   | 3.072667 | 4.27E-60 | 1.32E-59 |
| Cand1     | 0.828891 | 4.65E-60 | 1.44E-59 |
| Rny1      | 2.266086 | 5.19E-60 | 1.60E-59 |
| Gm45292   | 1.826146 | 5.24E-60 | 1.62E-59 |
| Tmem214   | 0.952222 | 4.78E-60 | 1.48E-59 |
| Rad51c    | 1.987999 | 5.10E-60 | 1.58E-59 |
| Pum1      | 0.54821  | 5.63E-60 | 1.74E-59 |
| Timm23    | 0.682652 | 5.55E-60 | 1.71E-59 |
| Dnmbp     | 1.175461 | 5.61E-60 | 1.73E-59 |
| Ddx39b    | 0.58529  | 6.34E-60 | 1.95E-59 |
| Amacr     | 1.412304 | 7.61E-60 | 2.35E-59 |
| Ankhd1    | 0.651255 | 8.93E-60 | 2.75E-59 |
| Gm14508   | 3.611943 | 1.54E-59 | 4.73E-59 |
| Pdcl      | 0.761297 | 1.04E-59 | 3.21E-59 |
| Al429214  | 2.349109 | 1.18E-59 | 3.63E-59 |
| Abcf1     | 0.602227 | 1.09E-59 | 3.36E-59 |
| Capn10    | 1.498745 | 1.14E-59 | 3.50E-59 |
| Zfyve26   | 1.146421 | 1.16E-59 | 3.58E-59 |
| Nphp1     | 1.465677 | 1.19E-59 | 3.67E-59 |
| Mbd4      | 1.485638 | 1.49E-59 | 4.57E-59 |
| Cxxc5     | 0.875012 | 1.51E-59 | 4.63E-59 |
| Foxo3     | 0.851335 | 1.60E-59 | 4.90E-59 |
| Zcchc9    | 0.864014 | 1.89E-59 | 5.81E-59 |
| Hsd11     | 1.014398 | 2.37E-59 | 7.28E-59 |
| Exosc2    | 1.256949 | 2.58E-59 | 7.91E-59 |
| Tarsl2    | 1.411461 | 2.75E-59 | 8.41E-59 |
| Txndc16   | 1.061604 | 2.69E-59 | 8.26E-59 |
| Tcerg1    | 0.711085 | 2.88E-59 | 8.82E-59 |
| Taf4      | 1.091758 | 2.88E-59 | 8.82E-59 |
| Rbm12b2   | 1.276826 | 2.99E-59 | 9.14E-59 |
| Gm37397   | 2.293279 | 4.32E-59 | 1.32E-58 |
| Prpf38b   | 0.583735 | 4.03E-59 | 1.23E-58 |
| Zfp120    | 1.141153 | 4.86E-59 | 1.49E-58 |
| Smchd1    | 0.595719 | 5.31E-59 | 1.62E-58 |
| Cdk12     | 0.608045 | 6.05E-59 | 1.85E-58 |
| Zdhhc7    | 1.100828 | 6.17E-59 | 1.88E-58 |
| Ttc4      | 0.966115 | 6.20E-59 | 1.89E-58 |
| Zfyve9    | 0.746886 | 7.24E-59 | 2.21E-58 |
| Cluap1    | 1.099546 | 7.13E-59 | 2.18E-58 |
| Usp16     | 0.78413  | 7.25E-59 | 2.21E-58 |
| A230051N  | 2.475345 | 8.73E-59 | 2.66E-58 |
| Pias4     | 0.946863 | 9.58E-59 | 2.92E-58 |



|           |          |          |          |
|-----------|----------|----------|----------|
| Klhdc8b   | 0.829535 | 1.01E-58 | 3.07E-58 |
| Coq7      | 0.857329 | 1.02E-58 | 3.12E-58 |
| Gm43598   | 2.661532 | 1.22E-58 | 3.71E-58 |
| Med14     | 1.047669 | 1.19E-58 | 3.63E-58 |
| Celf6     | 2.81323  | 1.54E-58 | 4.67E-58 |
| Mecr      | 1.353023 | 1.35E-58 | 4.09E-58 |
| Gm37570   | 2.16752  | 1.54E-58 | 4.68E-58 |
| Zbtb11    | 0.973108 | 1.51E-58 | 4.58E-58 |
| Ift22     | 1.123307 | 1.71E-58 | 5.18E-58 |
| Marchf9   | 1.374034 | 1.78E-58 | 5.41E-58 |
| Gm45464   | 2.109669 | 2.02E-58 | 6.12E-58 |
| Gm26801   | 2.934385 | 2.75E-58 | 8.33E-58 |
| Galnt10   | 0.876793 | 3.24E-58 | 9.82E-58 |
| Gm26981   | 2.291992 | 3.97E-58 | 1.20E-57 |
| Bbs10     | 2.090845 | 3.75E-58 | 1.14E-57 |
| Bicral    | 0.856758 | 3.48E-58 | 1.05E-57 |
| Ankrd39   | 1.224128 | 3.79E-58 | 1.15E-57 |
| Kidins220 | 0.635559 | 5.53E-58 | 1.67E-57 |
| Ckb       | 0.446168 | 7.91E-58 | 2.39E-57 |
| Zfp740    | 0.770656 | 9.48E-58 | 2.86E-57 |
| Ccdc138   | 1.812684 | 1.13E-57 | 3.41E-57 |
| Gm38037   | 3.475457 | 1.48E-57 | 4.46E-57 |
| Sms       | 0.703691 | 1.29E-57 | 3.88E-57 |
| Cry1      | 0.983426 | 1.28E-57 | 3.86E-57 |
| Ankra2    | 0.840966 | 1.87E-57 | 5.63E-57 |
| Dnajc11   | 1.075221 | 2.14E-57 | 6.46E-57 |
| Nipsnap1  | 1.130137 | 2.21E-57 | 6.67E-57 |
| Ankrd26   | 0.996632 | 2.37E-57 | 7.15E-57 |
| Gm37534   | 1.695398 | 3.87E-57 | 1.17E-56 |
| Paqr9     | 1.127691 | 4.05E-57 | 1.22E-56 |
| Parp1     | 0.906945 | 4.08E-57 | 1.23E-56 |
| Gm8251    | 3.168904 | 6.08E-57 | 1.83E-56 |
| Sh3yl1    | 1.591349 | 4.24E-57 | 1.27E-56 |
| Gm49338   | 1.164101 | 4.50E-57 | 1.35E-56 |
| Taf1d     | 0.649464 | 4.70E-57 | 1.41E-56 |
| Prnp      | 0.441538 | 5.55E-57 | 1.67E-56 |
| Wwc2      | 0.472606 | 5.68E-57 | 1.71E-56 |
| Gm37677   | 1.798473 | 6.28E-57 | 1.88E-56 |
| Trim67    | 1.971735 | 6.57E-57 | 1.97E-56 |
| Cdc123    | 0.758342 | 6.84E-57 | 2.05E-56 |
| Acad8     | 1.037954 | 7.52E-57 | 2.25E-56 |
| Zfp760    | 1.151621 | 7.63E-57 | 2.29E-56 |
| Pex1      | 1.318656 | 8.45E-57 | 2.53E-56 |
| Crls1     | 1.097481 | 8.66E-57 | 2.60E-56 |
| Pcnx4     | 1.166423 | 8.70E-57 | 2.60E-56 |
| Extl2     | 1.136579 | 9.83E-57 | 2.94E-56 |
| Fmn1      | 1.335255 | 9.97E-57 | 2.98E-56 |

|           |          |          |          |
|-----------|----------|----------|----------|
| Ska2      | 1.054673 | 1.04E-56 | 3.12E-56 |
| Fntb      | 1.305413 | 1.09E-56 | 3.26E-56 |
| D730044K  | 2.591537 | 1.46E-56 | 4.37E-56 |
| Ddit4     | 0.527503 | 1.23E-56 | 3.67E-56 |
| Vmp1      | 0.746494 | 1.20E-56 | 3.60E-56 |
| Tsc1      | 0.993477 | 1.28E-56 | 3.83E-56 |
| Cwf19l2   | 0.656285 | 1.35E-56 | 4.03E-56 |
| Gm10657   | 3.708454 | 2.04E-56 | 6.08E-56 |
| Miga1     | 0.93356  | 1.56E-56 | 4.67E-56 |
| Msl2      | 0.692001 | 1.70E-56 | 5.09E-56 |
| Trim26    | 0.789312 | 1.71E-56 | 5.11E-56 |
| Gm38365   | 1.799124 | 1.85E-56 | 5.51E-56 |
| Clp1      | 1.29476  | 2.11E-56 | 6.29E-56 |
| Lin7c     | 0.615062 | 2.23E-56 | 6.65E-56 |
| Gm43858   | 2.549351 | 3.83E-56 | 1.14E-55 |
| Snx27     | 0.718694 | 3.72E-56 | 1.11E-55 |
| Med19     | 0.679741 | 3.77E-56 | 1.12E-55 |
| Zfp691    | 1.691    | 3.90E-56 | 1.16E-55 |
| Pip5k1a   | 0.783593 | 3.98E-56 | 1.19E-55 |
| Tmem267   | 1.615171 | 4.18E-56 | 1.24E-55 |
| Coq10a    | 1.027551 | 4.34E-56 | 1.29E-55 |
| Cacna2d2  | 1.386463 | 5.29E-56 | 1.57E-55 |
| Ufsp1     | 1.369894 | 5.67E-56 | 1.69E-55 |
| Atat1     | 1.107654 | 6.26E-56 | 1.86E-55 |
| BC037704  | 2.499404 | 8.39E-56 | 2.49E-55 |
| Itsn1     | 0.849023 | 8.07E-56 | 2.40E-55 |
| E330034L1 | 1.50426  | 8.33E-56 | 2.47E-55 |
| Fgd1      | 1.264051 | 8.53E-56 | 2.53E-55 |
| Gm35256   | 4.219093 | 1.50E-55 | 4.44E-55 |
| Hibadh    | 0.656111 | 1.12E-55 | 3.31E-55 |
| Med9os    | 2.022642 | 1.19E-55 | 3.52E-55 |
| Fam241b   | 1.81174  | 1.24E-55 | 3.66E-55 |
| Gm45745   | 3.449112 | 1.66E-55 | 4.91E-55 |
| Fam13b    | 0.890581 | 1.24E-55 | 3.67E-55 |
| Zfp607b   | 1.599524 | 1.76E-55 | 5.20E-55 |
| 9330121JC | 2.830548 | 2.44E-55 | 7.20E-55 |
| Klhl29    | 1.97876  | 2.34E-55 | 6.92E-55 |
| Mis12     | 1.016297 | 2.29E-55 | 6.76E-55 |
| Ipo7      | 0.728953 | 2.33E-55 | 6.88E-55 |
| Arid4b    | 0.523389 | 2.39E-55 | 7.05E-55 |
| Trrap     | 0.677107 | 2.40E-55 | 7.10E-55 |
| Zfp882    | 1.451913 | 2.67E-55 | 7.88E-55 |
| Mmd       | 0.775976 | 2.64E-55 | 7.79E-55 |
| 6330418Kl | 1.48525  | 2.65E-55 | 7.82E-55 |
| Kbtbd4    | 1.175668 | 2.72E-55 | 8.02E-55 |
| Ubap1     | 0.962692 | 2.93E-55 | 8.64E-55 |
| Klc4      | 1.075125 | 3.19E-55 | 9.41E-55 |

|           |          |          |          |
|-----------|----------|----------|----------|
| Mettl16   | 0.860477 | 3.28E-55 | 9.68E-55 |
| 4833439L1 | 0.62762  | 3.46E-55 | 1.02E-54 |
| Ide       | 0.739803 | 3.62E-55 | 1.07E-54 |
| Gm47689   | 2.413272 | 4.60E-55 | 1.35E-54 |
| Klkb1     | 2.373029 | 4.37E-55 | 1.29E-54 |
| Mthfd2    | 1.803459 | 4.22E-55 | 1.24E-54 |
| Zfp566    | 1.685508 | 5.05E-55 | 1.49E-54 |
| Ppp1r12b  | 0.899301 | 5.17E-55 | 1.52E-54 |
| Tmem185i  | 1.068023 | 5.17E-55 | 1.52E-54 |
| Ddx24     | 0.482225 | 5.54E-55 | 1.63E-54 |
| Gm38126   | 2.436842 | 9.12E-55 | 2.68E-54 |
| Gm34220   | 1.294519 | 7.57E-55 | 2.23E-54 |
| Gpr135    | 2.17178  | 8.44E-55 | 2.48E-54 |
| Igf2bp2   | 2.522443 | 9.90E-55 | 2.91E-54 |
| Ypel3     | 0.495352 | 9.98E-55 | 2.93E-54 |
| Dis3l2    | 1.191777 | 1.16E-54 | 3.40E-54 |
| Pdk3      | 1.375697 | 1.23E-54 | 3.61E-54 |
| Gm44883   | 2.83582  | 1.47E-54 | 4.31E-54 |
| Ift57     | 0.966291 | 1.34E-54 | 3.92E-54 |
| Gm14216   | 2.984553 | 1.73E-54 | 5.08E-54 |
| Chac2     | 1.289275 | 1.55E-54 | 4.54E-54 |
| Gm42600   | 1.969997 | 1.68E-54 | 4.92E-54 |
| Zup1      | 0.856983 | 1.77E-54 | 5.19E-54 |
| Abi2      | 0.690602 | 2.28E-54 | 6.67E-54 |
| Tada2a    | 0.968926 | 2.45E-54 | 7.15E-54 |
| Arl16     | 1.291865 | 2.58E-54 | 7.56E-54 |
| Coa7      | 1.031361 | 2.76E-54 | 8.07E-54 |
| Dnajb4    | 0.768089 | 2.78E-54 | 8.11E-54 |
| Acrbp     | 1.450524 | 2.91E-54 | 8.50E-54 |
| Papolb    | 3.211752 | 3.98E-54 | 1.16E-53 |
| Mdn1      | 1.180984 | 3.44E-54 | 1.00E-53 |
| Gm28791   | 1.536165 | 3.73E-54 | 1.09E-53 |
| 6720464F2 | 1.582343 | 3.87E-54 | 1.13E-53 |
| Msh2      | 0.885045 | 4.00E-54 | 1.17E-53 |
| Spice1    | 1.165195 | 4.07E-54 | 1.19E-53 |
| Impact    | 0.765008 | 4.35E-54 | 1.27E-53 |
| Gm43582   | 2.287613 | 4.87E-54 | 1.42E-53 |
| Nucb2     | 0.934049 | 4.54E-54 | 1.32E-53 |
| Ube2t     | 2.722377 | 6.60E-54 | 1.92E-53 |
| St3gal1   | 0.773022 | 5.62E-54 | 1.64E-53 |
| Dnah9     | 3.133634 | 8.32E-54 | 2.42E-53 |
| Cplane1   | 0.897085 | 6.77E-54 | 1.97E-53 |
| Asb7      | 1.109727 | 6.79E-54 | 1.98E-53 |
| Pde12     | 1.14312  | 7.02E-54 | 2.04E-53 |
| Phf20l1   | 0.531651 | 7.22E-54 | 2.10E-53 |
| Pop7      | 0.853737 | 8.00E-54 | 2.33E-53 |
| Mrpl57    | 0.751894 | 9.50E-54 | 2.76E-53 |

|           |          |          |          |
|-----------|----------|----------|----------|
| Alpk2     | 3.139962 | 1.25E-53 | 3.63E-53 |
| Glcci1    | 1.47893  | 1.04E-53 | 3.03E-53 |
| Pigc      | 1.096605 | 1.19E-53 | 3.47E-53 |
| Chka      | 0.750494 | 1.22E-53 | 3.55E-53 |
| Kcne2     | 1.739346 | 1.58E-53 | 4.58E-53 |
| Ankzf1    | 1.203131 | 1.65E-53 | 4.79E-53 |
| Kdm7a     | 0.656771 | 1.68E-53 | 4.86E-53 |
| Rab43     | 1.722747 | 1.77E-53 | 5.12E-53 |
| Ireb2     | 0.759611 | 1.69E-53 | 4.89E-53 |
| Snhg5     | 1.142751 | 1.75E-53 | 5.07E-53 |
| Eif4e     | 0.640368 | 1.81E-53 | 5.24E-53 |
| Tmem181   | 1.217937 | 1.89E-53 | 5.47E-53 |
| Rbm45     | 1.592499 | 2.11E-53 | 6.09E-53 |
| Gm43032   | 2.540089 | 2.35E-53 | 6.81E-53 |
| Zfp687    | 1.157371 | 2.40E-53 | 6.95E-53 |
| Rbbp5     | 1.092612 | 2.51E-53 | 7.26E-53 |
| Ddx23     | 0.797339 | 2.60E-53 | 7.52E-53 |
| 2810021J2 | 2.024752 | 2.79E-53 | 8.05E-53 |
| Kctd15    | 1.676673 | 2.64E-53 | 7.63E-53 |
| Tmem80    | 0.861422 | 3.15E-53 | 9.08E-53 |
| B230354K  | 1.062881 | 3.28E-53 | 9.46E-53 |
| 1810044D  | 1.894367 | 3.47E-53 | 1.00E-52 |
| Mapk1ip1  | 0.892127 | 3.50E-53 | 1.01E-52 |
| Adnp      | 1.301766 | 3.87E-53 | 1.12E-52 |
| Map3k2    | 0.67853  | 3.88E-53 | 1.12E-52 |
| Gm43622   | 2.712432 | 4.56E-53 | 1.31E-52 |
| Cc2d1b    | 1.292118 | 4.02E-53 | 1.16E-52 |
| Prok1     | 3.813417 | 7.64E-53 | 2.19E-52 |
| Psmg3     | 0.961974 | 5.59E-53 | 1.61E-52 |
| Prkn      | 2.22142  | 6.15E-53 | 1.77E-52 |
| Acvr2a    | 1.086777 | 5.70E-53 | 1.64E-52 |
| Ank3      | 0.740957 | 6.98E-53 | 2.01E-52 |
| C2cd3     | 1.04599  | 7.14E-53 | 2.05E-52 |
| Arid2     | 0.657567 | 8.17E-53 | 2.35E-52 |
| 1700007L1 | 2.003195 | 8.75E-53 | 2.51E-52 |
| Sp6       | 1.986868 | 8.84E-53 | 2.54E-52 |
| Yju2      | 1.074235 | 9.67E-53 | 2.78E-52 |
| Pick1     | 1.211939 | 1.04E-52 | 2.98E-52 |
| Pex3      | 0.948532 | 1.08E-52 | 3.11E-52 |
| 2900018N  | 3.152554 | 1.47E-52 | 4.22E-52 |
| Prorsd1   | 0.892788 | 1.20E-52 | 3.44E-52 |
| Polr1c    | 0.894139 | 1.31E-52 | 3.76E-52 |
| Uty       | 0.929182 | 1.39E-52 | 3.97E-52 |
| Cct6a     | 0.510128 | 1.50E-52 | 4.30E-52 |
| Gm48146   | 1.739432 | 1.55E-52 | 4.45E-52 |
| Gm48677   | 3.031526 | 2.05E-52 | 5.87E-52 |
| Lonrf1    | 1.398869 | 1.58E-52 | 4.53E-52 |

|           |          |          |          |
|-----------|----------|----------|----------|
| Akap10    | 1.121707 | 1.72E-52 | 4.93E-52 |
| Tsr2      | 0.977318 | 1.78E-52 | 5.10E-52 |
| Gm44136   | 2.984834 | 2.26E-52 | 6.47E-52 |
| 9030025P  | 1.271473 | 1.84E-52 | 5.27E-52 |
| Mrpl50    | 0.815793 | 2.03E-52 | 5.79E-52 |
| Spire2    | 3.001866 | 2.94E-52 | 8.37E-52 |
| Ciapi1    | 0.876137 | 2.40E-52 | 6.85E-52 |
| Zfp451    | 0.725208 | 2.54E-52 | 7.25E-52 |
| Cep97     | 1.178318 | 2.63E-52 | 7.49E-52 |
| Gm49741   | 2.305524 | 3.19E-52 | 9.08E-52 |
| Phf12     | 0.713229 | 3.13E-52 | 8.92E-52 |
| Ppp1r7    | 0.679339 | 3.27E-52 | 9.32E-52 |
| Gm44093   | 2.589094 | 4.31E-52 | 1.23E-51 |
| Gm42614   | 3.929819 | 5.55E-52 | 1.58E-51 |
| Gspt2     | 1.558675 | 4.14E-52 | 1.18E-51 |
| Entpd7    | 1.408977 | 4.18E-52 | 1.19E-51 |
| Rab37     | 2.632779 | 4.90E-52 | 1.39E-51 |
| Peli2     | 0.921961 | 4.27E-52 | 1.21E-51 |
| Nrg4      | 3.860014 | 6.11E-52 | 1.73E-51 |
| Nbr1      | 0.610061 | 4.68E-52 | 1.33E-51 |
| Bcdin3d   | 1.258048 | 5.91E-52 | 1.68E-51 |
| Ipo9      | 0.874912 | 5.94E-52 | 1.69E-51 |
| Mettl14   | 1.096475 | 6.14E-52 | 1.74E-51 |
| Trmt11    | 1.057577 | 7.71E-52 | 2.19E-51 |
| Gm2694    | 2.949836 | 9.51E-52 | 2.69E-51 |
| 4933413LC | 3.968087 | 1.22E-51 | 3.46E-51 |
| Selenoo   | 1.055582 | 9.21E-52 | 2.61E-51 |
| Cebpzos   | 0.658551 | 1.01E-51 | 2.86E-51 |
| Gtf2a2    | 0.571282 | 1.02E-51 | 2.87E-51 |
| Gart      | 1.064788 | 1.07E-51 | 3.02E-51 |
| C920006O  | 2.153675 | 1.33E-51 | 3.77E-51 |
| Mrpl9     | 0.780531 | 1.20E-51 | 3.39E-51 |
| Zfp407    | 0.9611   | 1.33E-51 | 3.77E-51 |
| E130102H  | 0.883251 | 1.43E-51 | 4.03E-51 |
| Ppig      | 0.453896 | 1.58E-51 | 4.47E-51 |
| Anks3     | 0.97229  | 1.74E-51 | 4.93E-51 |
| Pdss1     | 1.894808 | 1.89E-51 | 5.34E-51 |
| Borcs8    | 0.867754 | 1.81E-51 | 5.11E-51 |
| A530083I2 | 2.806231 | 2.13E-51 | 6.01E-51 |
| Ankrd27   | 1.090477 | 1.97E-51 | 5.56E-51 |
| Vegfa     | 0.982177 | 2.00E-51 | 5.65E-51 |
| Snw1      | 0.517568 | 2.14E-51 | 6.04E-51 |
| Wdr7      | 1.114707 | 2.13E-51 | 6.01E-51 |
| Sema6c    | 1.538745 | 2.63E-51 | 7.41E-51 |
| Med16     | 0.938929 | 2.63E-51 | 7.39E-51 |
| Blmh      | 0.726479 | 2.66E-51 | 7.48E-51 |
| Gm21781   | 1.592615 | 2.70E-51 | 7.61E-51 |

|          |          |          |          |
|----------|----------|----------|----------|
| 1700116B | 2.891608 | 3.51E-51 | 9.88E-51 |
| Gm48581  | 3.174563 | 3.98E-51 | 1.12E-50 |
| Gm9077   | 3.329988 | 4.33E-51 | 1.22E-50 |
| Dus4l    | 1.627363 | 3.73E-51 | 1.05E-50 |
| Edrf1    | 1.13226  | 3.60E-51 | 1.01E-50 |
| Nr1d2    | 0.572522 | 3.68E-51 | 1.03E-50 |
| Gm37748  | 3.07179  | 4.79E-51 | 1.35E-50 |
| Gm49152  | 1.547431 | 4.95E-51 | 1.39E-50 |
| Ftx      | 1.487739 | 5.23E-51 | 1.47E-50 |
| Acvr1b   | 1.370642 | 6.26E-51 | 1.76E-50 |
| Papola   | 0.500027 | 6.62E-51 | 1.86E-50 |
| Gm45509  | 2.166692 | 7.75E-51 | 2.17E-50 |
| Gm43852  | 2.4419   | 7.82E-51 | 2.19E-50 |
| Mettl6   | 1.012643 | 7.76E-51 | 2.17E-50 |
| Plekhj1  | 0.633614 | 7.90E-51 | 2.21E-50 |
| Mrpl14   | 0.589868 | 8.08E-51 | 2.26E-50 |
| Zbtb4    | 0.492907 | 9.88E-51 | 2.77E-50 |
| Lrrc46   | 2.688117 | 1.13E-50 | 3.16E-50 |
| Mdm2     | 0.762788 | 9.92E-51 | 2.78E-50 |
| Brms1l   | 0.936878 | 1.01E-50 | 2.82E-50 |
| Gm4189   | 2.30389  | 1.14E-50 | 3.19E-50 |
| Msmo1    | 0.805903 | 1.15E-50 | 3.21E-50 |
| 2610021A | 1.399158 | 1.34E-50 | 3.74E-50 |
| 9430037G | 2.242887 | 1.50E-50 | 4.20E-50 |
| Lemd3    | 0.930119 | 1.57E-50 | 4.39E-50 |
| Gm49125  | 2.269957 | 1.71E-50 | 4.79E-50 |
| Wipi2    | 0.739562 | 1.64E-50 | 4.57E-50 |
| Amer1    | 1.125323 | 1.66E-50 | 4.64E-50 |
| Zfp784   | 1.775554 | 2.02E-50 | 5.63E-50 |
| Ube2d-ps | 1.07369  | 1.95E-50 | 5.44E-50 |
| Apoo     | 1.025711 | 2.10E-50 | 5.86E-50 |
| Bpgm     | 0.758776 | 2.26E-50 | 6.30E-50 |
| Dvl3     | 0.929108 | 2.27E-50 | 6.34E-50 |
| A630052C | 1.900047 | 2.60E-50 | 7.24E-50 |
| Snx30    | 1.499679 | 2.39E-50 | 6.66E-50 |
| Slc17a3  | 3.923319 | 3.91E-50 | 1.09E-49 |
| Dnaaf8   | 2.978387 | 3.75E-50 | 1.04E-49 |
| Rimbp3   | 3.605135 | 4.17E-50 | 1.16E-49 |
| Hs2st1   | 0.735927 | 3.33E-50 | 9.27E-50 |
| 4921515G | 2.384861 | 4.11E-50 | 1.14E-49 |
| Arfp2    | 0.924384 | 3.57E-50 | 9.94E-50 |
| Mms19    | 0.941275 | 5.18E-50 | 1.44E-49 |
| Fbxl20   | 0.813062 | 5.86E-50 | 1.63E-49 |
| Mfn1     | 0.825681 | 6.73E-50 | 1.87E-49 |
| Ctif     | 0.97365  | 7.07E-50 | 1.96E-49 |
| Ascc3    | 0.76343  | 7.72E-50 | 2.14E-49 |
| Kin      | 0.781659 | 8.86E-50 | 2.46E-49 |

|          |          |          |          |
|----------|----------|----------|----------|
| Tagap1   | 1.577891 | 9.18E-50 | 2.55E-49 |
| Rb1cc1   | 0.503458 | 9.51E-50 | 2.64E-49 |
| Crppa    | 1.901015 | 9.81E-50 | 2.72E-49 |
| Gpr108   | 0.810849 | 9.51E-50 | 2.64E-49 |
| Gm26793  | 2.813141 | 1.18E-49 | 3.27E-49 |
| Chrna5   | 2.638126 | 1.48E-49 | 4.11E-49 |
| Bcl2l13  | 0.990091 | 1.44E-49 | 3.99E-49 |
| Rnf25    | 1.135596 | 1.52E-49 | 4.21E-49 |
| Mre11a   | 1.191526 | 1.54E-49 | 4.26E-49 |
| Supt20   | 0.661368 | 1.71E-49 | 4.74E-49 |
| Rnf145   | 0.854486 | 1.81E-49 | 5.01E-49 |
| Patj     | 1.859082 | 1.87E-49 | 5.18E-49 |
| Xrcc2    | 1.817154 | 1.96E-49 | 5.42E-49 |
| Kansl3   | 0.660027 | 2.15E-49 | 5.94E-49 |
| Arid4a   | 0.541739 | 2.21E-49 | 6.10E-49 |
| Srebf1   | 0.838512 | 2.35E-49 | 6.50E-49 |
| Gtf2e1   | 1.402611 | 2.36E-49 | 6.53E-49 |
| Ube2h    | 0.580149 | 2.55E-49 | 7.04E-49 |
| Clasp2   | 0.604419 | 2.70E-49 | 7.44E-49 |
| 2810454H | 1.125822 | 2.91E-49 | 8.03E-49 |
| 2610528A | 2.430545 | 3.19E-49 | 8.79E-49 |
| Ube2d2a  | 0.485698 | 3.29E-49 | 9.06E-49 |
| Ntrk3    | 2.29528  | 3.66E-49 | 1.01E-48 |
| Terf2ip  | 0.776233 | 3.81E-49 | 1.05E-48 |
| Vdac2    | 0.410232 | 4.02E-49 | 1.11E-48 |
| Gm15607  | 3.18655  | 5.29E-49 | 1.45E-48 |
| Gm5915   | 2.388261 | 4.56E-49 | 1.25E-48 |
| Birc2    | 0.726538 | 4.24E-49 | 1.17E-48 |
| Znhit2   | 1.124528 | 4.79E-49 | 1.32E-48 |
| Atad5    | 1.417083 | 4.97E-49 | 1.37E-48 |
| Rprd1a   | 0.776462 | 5.32E-49 | 1.46E-48 |
| Tmem240  | 1.419119 | 5.78E-49 | 1.59E-48 |
| Donson   | 1.348682 | 6.24E-49 | 1.71E-48 |
| Txndc11  | 0.923434 | 6.48E-49 | 1.78E-48 |
| Slc22a30 | 3.448758 | 8.56E-49 | 2.35E-48 |
| Fastk    | 0.871854 | 6.97E-49 | 1.91E-48 |
| Cdk5rap2 | 1.044643 | 7.01E-49 | 1.92E-48 |
| Coq8b    | 1.499694 | 7.43E-49 | 2.04E-48 |
| Incenp   | 1.403955 | 7.35E-49 | 2.01E-48 |
| Ppm1a    | 0.494007 | 7.91E-49 | 2.17E-48 |
| Tmem116  | 2.948759 | 9.97E-49 | 2.73E-48 |
| Dgkeos   | 2.84951  | 9.54E-49 | 2.61E-48 |
| Sgpp1    | 0.852574 | 8.90E-49 | 2.44E-48 |
| Nrtn     | 1.887997 | 9.84E-49 | 2.69E-48 |
| Sv2a     | 0.98951  | 1.02E-48 | 2.79E-48 |
| Znhit3   | 0.910127 | 1.03E-48 | 2.82E-48 |
| Zcchc18  | 1.051212 | 1.08E-48 | 2.94E-48 |

|           |          |          |          |
|-----------|----------|----------|----------|
| Pphln1    | 0.954881 | 1.07E-48 | 2.94E-48 |
| Gm43527   | 2.824959 | 1.42E-48 | 3.86E-48 |
| Jpx       | 1.442105 | 1.28E-48 | 3.50E-48 |
| G3bp2     | 0.459199 | 1.30E-48 | 3.56E-48 |
| Gm47956   | 3.366163 | 1.69E-48 | 4.61E-48 |
| Rbm12     | 0.965299 | 1.60E-48 | 4.36E-48 |
| Lrp2      | 1.874338 | 1.89E-48 | 5.15E-48 |
| 2810001G  | 0.914008 | 1.83E-48 | 4.99E-48 |
| 2410004B  | 0.753854 | 1.84E-48 | 5.02E-48 |
| Kmt2b     | 0.723392 | 1.94E-48 | 5.29E-48 |
| Cnih1     | 0.631415 | 1.98E-48 | 5.41E-48 |
| Phka2     | 1.247785 | 2.09E-48 | 5.69E-48 |
| Zscan22   | 1.426557 | 2.14E-48 | 5.82E-48 |
| Raf1      | 0.683998 | 2.25E-48 | 6.14E-48 |
| Slc4a1ap  | 0.847541 | 2.31E-48 | 6.29E-48 |
| Mettl1    | 1.358014 | 2.58E-48 | 7.03E-48 |
| Paip2b    | 0.99377  | 2.60E-48 | 7.07E-48 |
| Rnmt      | 0.876884 | 2.69E-48 | 7.31E-48 |
| Ccpg1     | 0.867333 | 3.15E-48 | 8.58E-48 |
| Ppp1r18os | 2.666196 | 3.66E-48 | 9.95E-48 |
| Eed       | 0.863479 | 3.22E-48 | 8.76E-48 |
| Prps1     | 0.89371  | 3.38E-48 | 9.18E-48 |
| Gm47252   | 4.892226 | 5.32E-48 | 1.44E-47 |
| Pex10     | 1.359852 | 3.88E-48 | 1.05E-47 |
| Gm6658    | 2.508896 | 4.29E-48 | 1.17E-47 |
| Cars      | 1.082906 | 3.90E-48 | 1.06E-47 |
| Ino80d    | 0.562849 | 3.99E-48 | 1.08E-47 |
| Gm30198   | 2.790093 | 4.31E-48 | 1.17E-47 |
| Rab3gap1  | 0.678255 | 4.33E-48 | 1.18E-47 |
| Cdc73     | 0.589396 | 4.45E-48 | 1.21E-47 |
| Nsmce2    | 0.839076 | 4.57E-48 | 1.24E-47 |
| Gm15728   | 2.880391 | 5.31E-48 | 1.44E-47 |
| Paxx      | 0.764087 | 4.93E-48 | 1.34E-47 |
| Rbm27     | 0.583269 | 5.10E-48 | 1.38E-47 |
| Zfp84     | 0.996499 | 5.34E-48 | 1.45E-47 |
| Matr3     | 0.445167 | 5.62E-48 | 1.52E-47 |
| Ptprs     | 0.687051 | 5.65E-48 | 1.53E-47 |
| A930014D  | 2.950857 | 6.90E-48 | 1.87E-47 |
| Trim11    | 1.026013 | 5.98E-48 | 1.62E-47 |
| Mplkip    | 0.720573 | 6.03E-48 | 1.63E-47 |
| Mrpl2     | 0.773048 | 7.07E-48 | 1.91E-47 |
| Celf1     | 0.481886 | 9.06E-48 | 2.45E-47 |
| Cotl1     | 0.733115 | 1.03E-47 | 2.79E-47 |
| Lmn2      | 1.494787 | 1.07E-47 | 2.88E-47 |
| Gpatch2l  | 1.112675 | 1.21E-47 | 3.26E-47 |
| Ring1     | 0.847899 | 1.26E-47 | 3.41E-47 |
| Zfr       | 0.474102 | 1.31E-47 | 3.55E-47 |



|          |          |          |          |
|----------|----------|----------|----------|
| Upf3a    | 0.6401   | 1.31E-47 | 3.53E-47 |
| Mettl25  | 1.448431 | 1.33E-47 | 3.59E-47 |
| A230083N | 2.884822 | 1.58E-47 | 4.25E-47 |
| Mtr      | 0.977332 | 1.47E-47 | 3.98E-47 |
| Ugdh     | 0.975751 | 1.49E-47 | 4.01E-47 |
| Pals2    | 0.962849 | 1.53E-47 | 4.13E-47 |
| Ccdc174  | 0.691733 | 1.62E-47 | 4.37E-47 |
| Tafa3    | 1.689176 | 1.79E-47 | 4.81E-47 |
| Orc6     | 0.901342 | 1.87E-47 | 5.03E-47 |
| Zfp553   | 1.077935 | 1.94E-47 | 5.23E-47 |
| Uqcrq    | 0.373536 | 2.03E-47 | 5.46E-47 |
| Ddx42    | 0.562603 | 2.04E-47 | 5.49E-47 |
| 8030456M | 2.408831 | 2.24E-47 | 6.03E-47 |
| Zfp112   | 2.003942 | 2.82E-47 | 7.58E-47 |
| Dcaf10   | 0.910079 | 2.63E-47 | 7.08E-47 |
| B3galt6  | 1.440391 | 3.04E-47 | 8.16E-47 |
| Irs2     | 1.224938 | 3.09E-47 | 8.30E-47 |
| Rnft2    | 1.633794 | 3.22E-47 | 8.64E-47 |
| Lrrc24   | 1.685357 | 3.31E-47 | 8.88E-47 |
| Atf2     | 0.605255 | 3.71E-47 | 9.96E-47 |
| D230049E | 1.903115 | 3.91E-47 | 1.05E-46 |
| Wwp1     | 0.705548 | 3.80E-47 | 1.02E-46 |
| Cse1l    | 0.82653  | 4.07E-47 | 1.09E-46 |
| 5330438D | 1.298183 | 4.75E-47 | 1.27E-46 |
| Zfp937   | 1.553726 | 5.13E-47 | 1.38E-46 |
| Dnaja4   | 0.960215 | 5.13E-47 | 1.38E-46 |
| Dck      | 1.456026 | 5.18E-47 | 1.39E-46 |
| Gm20300  | 0.982804 | 6.33E-47 | 1.70E-46 |
| Thap4    | 1.16786  | 6.70E-47 | 1.79E-46 |
| Cdc23    | 0.820511 | 7.02E-47 | 1.88E-46 |
| Gm27200  | 4.430655 | 1.05E-46 | 2.82E-46 |
| Zfp955a  | 1.49706  | 7.87E-47 | 2.11E-46 |
| Gpn3     | 0.934032 | 8.13E-47 | 2.17E-46 |
| Cryzl1   | 0.673703 | 8.70E-47 | 2.33E-46 |
| Hint3    | 0.747061 | 9.20E-47 | 2.46E-46 |
| Cep95    | 1.587505 | 9.64E-47 | 2.58E-46 |
| Snhg10   | 1.646521 | 9.87E-47 | 2.64E-46 |
| Atad1    | 0.668326 | 1.12E-46 | 2.98E-46 |
| Gm45110  | 2.186958 | 1.22E-46 | 3.24E-46 |
| A130050O | 1.466575 | 1.22E-46 | 3.25E-46 |
| Inafm2   | 0.9317   | 1.21E-46 | 3.22E-46 |
| Ppp1r13l | 2.036092 | 1.39E-46 | 3.72E-46 |
| 4930551O | 4.123848 | 1.88E-46 | 5.00E-46 |
| Tctn3    | 1.61975  | 1.38E-46 | 3.69E-46 |
| Orc2     | 0.88196  | 1.55E-46 | 4.12E-46 |
| Zbtb22   | 0.933269 | 1.58E-46 | 4.22E-46 |
| Gm13421  | 2.69109  | 1.76E-46 | 4.69E-46 |

|          |          |          |          |
|----------|----------|----------|----------|
| Alkbh6   | 0.890702 | 1.60E-46 | 4.26E-46 |
| Zfp263   | 0.928507 | 1.61E-46 | 4.28E-46 |
| Ddx20    | 1.224683 | 1.80E-46 | 4.79E-46 |
| Gm37733  | 1.782845 | 1.93E-46 | 5.13E-46 |
| A930023M | 2.753922 | 2.18E-46 | 5.79E-46 |
| Ccnj     | 1.621933 | 2.09E-46 | 5.55E-46 |
| Rbl2     | 0.789413 | 2.10E-46 | 5.58E-46 |
| Bcor     | 0.75541  | 2.21E-46 | 5.87E-46 |
| Hnrnpul2 | 0.485368 | 2.28E-46 | 6.06E-46 |
| Gtf3c4   | 1.04815  | 2.24E-46 | 5.95E-46 |
| Gm17207  | 3.371906 | 3.34E-46 | 8.88E-46 |
| Fam98b   | 0.757245 | 2.64E-46 | 7.01E-46 |
| Snph     | 1.849106 | 3.42E-46 | 9.07E-46 |
| Cyld     | 0.724157 | 3.59E-46 | 9.53E-46 |
| Srfbp1   | 1.041513 | 4.24E-46 | 1.12E-45 |
| Smad2    | 0.835071 | 4.38E-46 | 1.16E-45 |
| Fbxo8    | 0.797793 | 4.59E-46 | 1.22E-45 |
| Trip4    | 0.832323 | 4.64E-46 | 1.23E-45 |
| Fmc1     | 0.57882  | 5.35E-46 | 1.42E-45 |
| Gm37407  | 1.594627 | 5.65E-46 | 1.50E-45 |
| Mrps33   | 0.465318 | 5.90E-46 | 1.56E-45 |
| Zfp791   | 2.197045 | 6.30E-46 | 1.67E-45 |
| B930059L | 2.547875 | 6.86E-46 | 1.81E-45 |
| Gm38380  | 1.621764 | 6.52E-46 | 1.72E-45 |
| Dstyk    | 0.664207 | 7.08E-46 | 1.87E-45 |
| Wdr19    | 1.415323 | 7.80E-46 | 2.06E-45 |
| Rbmxl1   | 0.747317 | 8.01E-46 | 2.12E-45 |
| Smyd4    | 1.176268 | 8.28E-46 | 2.19E-45 |
| Zfp688   | 1.223536 | 8.52E-46 | 2.25E-45 |
| Scnm1    | 0.90387  | 9.91E-46 | 2.62E-45 |
| Ecpas    | 0.615269 | 1.01E-45 | 2.67E-45 |
| Dnaaf4   | 2.756154 | 1.21E-45 | 3.18E-45 |
| Eif4g3   | 0.481686 | 1.05E-45 | 2.76E-45 |
| E330037G | 1.753015 | 1.12E-45 | 2.96E-45 |
| Zfp579   | 1.219964 | 1.18E-45 | 3.12E-45 |
| Gm50010  | 1.691478 | 1.38E-45 | 3.63E-45 |
| Chd8     | 0.564445 | 1.86E-45 | 4.89E-45 |
| Zdhhc16  | 0.946958 | 1.87E-45 | 4.92E-45 |
| 6330403K | 0.493984 | 2.03E-45 | 5.33E-45 |
| Zcchc17  | 0.556125 | 2.11E-45 | 5.55E-45 |
| Sdr39u1  | 0.996333 | 2.12E-45 | 5.56E-45 |
| Qtrt1    | 1.282912 | 2.12E-45 | 5.58E-45 |
| Dmac1    | 0.732039 | 2.18E-45 | 5.74E-45 |
| Slc23a2  | 0.84069  | 2.49E-45 | 6.53E-45 |
| Tmem70   | 0.868132 | 2.49E-45 | 6.53E-45 |
| Snx29    | 1.381227 | 2.86E-45 | 7.49E-45 |
| Mul1     | 0.980946 | 3.18E-45 | 8.34E-45 |

|          |          |          |          |
|----------|----------|----------|----------|
| Pigo     | 1.571607 | 3.24E-45 | 8.49E-45 |
| Mrpl23   | 1.187168 | 3.65E-45 | 9.56E-45 |
| Ddx41    | 0.911385 | 3.88E-45 | 1.02E-44 |
| C230013L | 1.938625 | 4.07E-45 | 1.07E-44 |
| Gm6169   | 2.784245 | 5.11E-45 | 1.34E-44 |
| Ppcdc    | 1.128552 | 4.32E-45 | 1.13E-44 |
| Ppil2    | 0.722757 | 4.74E-45 | 1.24E-44 |
| Fip1l1   | 0.554479 | 4.89E-45 | 1.28E-44 |
| Mosmo    | 0.607679 | 5.34E-45 | 1.40E-44 |
| Gm38021  | 1.721908 | 5.52E-45 | 1.44E-44 |
| Clcn4    | 0.590647 | 7.65E-45 | 2.00E-44 |
| Mrpl43   | 0.585003 | 8.73E-45 | 2.28E-44 |
| Wdr59    | 1.125392 | 1.13E-44 | 2.96E-44 |
| Ss18l1   | 1.363822 | 1.21E-44 | 3.17E-44 |
| Ylpm1    | 0.585489 | 1.29E-44 | 3.37E-44 |
| Ercc6l2  | 0.888703 | 1.32E-44 | 3.46E-44 |
| Dyrk3    | 3.076916 | 1.74E-44 | 4.53E-44 |
| Firre    | 0.958194 | 1.50E-44 | 3.90E-44 |
| Elp2     | 0.896503 | 1.50E-44 | 3.92E-44 |
| Rspo2    | 3.652772 | 2.15E-44 | 5.61E-44 |
| Faf1     | 0.803937 | 1.67E-44 | 4.37E-44 |
| St13     | 0.424769 | 1.79E-44 | 4.67E-44 |
| Ociad1   | 0.544726 | 1.78E-44 | 4.63E-44 |
| Dis3     | 1.04408  | 1.96E-44 | 5.10E-44 |
| Setd1b   | 0.606791 | 2.11E-44 | 5.50E-44 |
| 2810405F | 3.305277 | 2.78E-44 | 7.23E-44 |
| Vcpip1   | 0.657186 | 3.02E-44 | 7.85E-44 |
| Gm47320  | 1.99506  | 3.26E-44 | 8.47E-44 |
| Gm38387  | 1.968319 | 3.28E-44 | 8.52E-44 |
| Fdxacb1  | 1.614052 | 3.22E-44 | 8.38E-44 |
| Doc2g    | 2.167738 | 3.53E-44 | 9.18E-44 |
| Klhl33   | 2.725349 | 3.75E-44 | 9.73E-44 |
| Gm49759  | 2.044296 | 3.93E-44 | 1.02E-43 |
| Terb1    | 2.832866 | 4.11E-44 | 1.06E-43 |
| Dgcr8    | 0.947536 | 3.79E-44 | 9.82E-44 |
| Gan      | 1.049621 | 3.96E-44 | 1.03E-43 |
| Gm50431  | 1.488639 | 4.74E-44 | 1.23E-43 |
| Apeh     | 0.960342 | 4.87E-44 | 1.26E-43 |
| Dusp5    | 1.667597 | 4.93E-44 | 1.28E-43 |
| Capn15   | 0.868957 | 5.28E-44 | 1.37E-43 |
| Zfp788   | 0.982698 | 5.38E-44 | 1.39E-43 |
| Fbxo45   | 0.923203 | 5.41E-44 | 1.40E-43 |
| Prpf40a  | 0.473132 | 6.26E-44 | 1.62E-43 |
| Gm34655  | 3.077301 | 7.08E-44 | 1.83E-43 |
| Zfp786   | 2.750339 | 6.90E-44 | 1.78E-43 |
| Prss38   | 3.31249  | 8.23E-44 | 2.13E-43 |
| Dpm1     | 0.651301 | 7.06E-44 | 1.82E-43 |

|           |          |          |          |
|-----------|----------|----------|----------|
| Neurl4    | 0.958498 | 8.19E-44 | 2.12E-43 |
| Zfp983    | 1.366599 | 8.32E-44 | 2.15E-43 |
| Calcoco1  | 0.75092  | 8.58E-44 | 2.22E-43 |
| Sh2b1     | 0.856485 | 8.77E-44 | 2.26E-43 |
| Akirin1   | 0.606506 | 9.01E-44 | 2.33E-43 |
| Fam135a   | 0.833296 | 1.06E-43 | 2.72E-43 |
| Lig3      | 1.026348 | 1.08E-43 | 2.78E-43 |
| Ranbp3    | 0.839325 | 1.08E-43 | 2.80E-43 |
| Glt8d1    | 0.862806 | 1.19E-43 | 3.07E-43 |
| 2610008E: | 0.843852 | 1.22E-43 | 3.15E-43 |
| Lsm14b    | 0.897085 | 1.22E-43 | 3.15E-43 |
| Gabpb2    | 0.740588 | 1.32E-43 | 3.41E-43 |
| Acbd3     | 0.553204 | 1.38E-43 | 3.55E-43 |
| Mir17hg   | 1.78858  | 1.43E-43 | 3.69E-43 |
| Cyp51     | 0.962842 | 1.42E-43 | 3.66E-43 |
| Ankrd42   | 2.344306 | 1.53E-43 | 3.95E-43 |
| Spire1    | 0.768625 | 1.47E-43 | 3.79E-43 |
| Slc25a11  | 0.650268 | 1.79E-43 | 4.60E-43 |
| Ap2m1     | 0.438209 | 1.99E-43 | 5.13E-43 |
| Gm33497   | 4.416991 | 2.83E-43 | 7.25E-43 |
| Zfp933    | 1.165355 | 2.18E-43 | 5.59E-43 |
| 1700040D  | 2.769177 | 2.56E-43 | 6.56E-43 |
| C130071C  | 0.8986   | 2.59E-43 | 6.66E-43 |
| Rragb     | 1.764293 | 2.67E-43 | 6.84E-43 |
| Zfp3      | 1.800094 | 2.75E-43 | 7.06E-43 |
| Gm43689   | 2.760631 | 3.06E-43 | 7.86E-43 |
| 1700023H  | 3.718755 | 3.60E-43 | 9.21E-43 |
| Gm44777   | 1.445115 | 3.07E-43 | 7.86E-43 |
| Nat10     | 1.295007 | 3.28E-43 | 8.41E-43 |
| Gemin8    | 1.481299 | 3.35E-43 | 8.57E-43 |
| Snx16     | 0.990603 | 3.37E-43 | 8.63E-43 |
| Gm10353   | 2.491608 | 4.16E-43 | 1.06E-42 |
| Acbd5     | 0.518939 | 4.01E-43 | 1.03E-42 |
| Gm43484   | 1.73533  | 4.08E-43 | 1.04E-42 |
| Htatsf1   | 0.572709 | 4.13E-43 | 1.06E-42 |
| Meaf6     | 0.766095 | 4.44E-43 | 1.13E-42 |
| Fdft1     | 0.965605 | 4.53E-43 | 1.16E-42 |
| Tbpl1     | 0.796294 | 4.69E-43 | 1.20E-42 |
| Scaf8     | 0.673409 | 5.18E-43 | 1.32E-42 |
| Stox2     | 0.583409 | 5.39E-43 | 1.38E-42 |
| Tjp2      | 0.648833 | 5.64E-43 | 1.44E-42 |
| Lig4      | 1.285538 | 5.84E-43 | 1.49E-42 |
| Gm8738    | 1.861273 | 6.52E-43 | 1.66E-42 |
| Mrpl28    | 0.608049 | 6.80E-43 | 1.74E-42 |
| Fbxl19    | 1.385842 | 6.91E-43 | 1.76E-42 |
| Gm48699   | 2.5237   | 7.48E-43 | 1.91E-42 |
| Pno1      | 1.138462 | 7.50E-43 | 1.91E-42 |

|           |          |          |          |
|-----------|----------|----------|----------|
| Mtx2      | 0.762904 | 8.90E-43 | 2.27E-42 |
| Herc1     | 0.474496 | 9.29E-43 | 2.37E-42 |
| Ccdc25    | 0.71951  | 9.42E-43 | 2.40E-42 |
| Pcsk4     | 1.458252 | 1.31E-42 | 3.33E-42 |
| Vps18     | 1.141262 | 1.53E-42 | 3.89E-42 |
| Pgrmc2    | 0.560205 | 1.58E-42 | 4.02E-42 |
| Ddx6      | 0.374087 | 1.69E-42 | 4.30E-42 |
| Gm31812   | 2.931176 | 1.96E-42 | 4.99E-42 |
| Gm43288   | 3.423499 | 2.05E-42 | 5.20E-42 |
| Mrpl38    | 0.794095 | 1.73E-42 | 4.41E-42 |
| Smarca5-p | 2.314764 | 1.96E-42 | 4.97E-42 |
| Rpl21-ps1 | 3.031858 | 2.07E-42 | 5.25E-42 |
| Eri1      | 1.116834 | 1.97E-42 | 5.00E-42 |
| Eif4g2    | 0.315892 | 2.42E-42 | 6.15E-42 |
| Timm22    | 0.728321 | 2.44E-42 | 6.18E-42 |
| Ube2w     | 0.704822 | 2.62E-42 | 6.63E-42 |
| Cfap70    | 3.705185 | 3.20E-42 | 8.10E-42 |
| Gm43488   | 3.248376 | 3.10E-42 | 7.84E-42 |
| Cyrib     | 0.797584 | 2.83E-42 | 7.16E-42 |
| Ube2o     | 0.880088 | 3.01E-42 | 7.62E-42 |
| Sfmbt1    | 0.987449 | 3.22E-42 | 8.16E-42 |
| Mroh1     | 1.049202 | 3.24E-42 | 8.18E-42 |
| Golga1    | 0.772004 | 3.33E-42 | 8.41E-42 |
| Gm45179   | 1.862162 | 3.42E-42 | 8.65E-42 |
| 4930465K  | 4.162649 | 4.64E-42 | 1.17E-41 |
| Gm20163   | 3.144653 | 4.64E-42 | 1.17E-41 |
| Tctn1     | 1.493019 | 4.10E-42 | 1.04E-41 |
| Gtpbp3    | 1.291353 | 4.32E-42 | 1.09E-41 |
| Gm12996   | 2.493207 | 4.83E-42 | 1.22E-41 |
| Exo5      | 1.572437 | 4.86E-42 | 1.23E-41 |
| Gm26724   | 1.10193  | 4.84E-42 | 1.22E-41 |
| Sh2d5     | 1.781442 | 5.01E-42 | 1.26E-41 |
| Gm36839   | 1.895976 | 5.84E-42 | 1.47E-41 |
| Cul4a     | 0.6903   | 6.05E-42 | 1.53E-41 |
| Gm3854    | 2.594204 | 6.52E-42 | 1.64E-41 |
| Rbm18     | 0.70557  | 6.08E-42 | 1.53E-41 |
| Ppp6r2    | 0.797199 | 6.16E-42 | 1.55E-41 |
| Smpd3     | 2.002538 | 6.44E-42 | 1.62E-41 |
| Ankrd46   | 0.654939 | 6.20E-42 | 1.56E-41 |
| Ttll4     | 1.221437 | 6.67E-42 | 1.68E-41 |
| Atp13a3   | 0.593645 | 7.09E-42 | 1.78E-41 |
| Cops2     | 0.633302 | 7.99E-42 | 2.01E-41 |
| Dcaf1     | 0.785692 | 8.06E-42 | 2.03E-41 |
| Zbed3     | 0.827016 | 8.07E-42 | 2.03E-41 |
| 2010320V  | 0.896322 | 8.50E-42 | 2.13E-41 |
| Dffa      | 1.125857 | 8.51E-42 | 2.14E-41 |
| Gm4924    | 1.326114 | 8.66E-42 | 2.18E-41 |

|           |          |          |          |
|-----------|----------|----------|----------|
| 4930579K: | 1.987589 | 9.17E-42 | 2.30E-41 |
| Gpatch2   | 0.79208  | 8.75E-42 | 2.20E-41 |
| Gm5914    | 1.11093  | 1.03E-41 | 2.58E-41 |
| Klhdc1    | 1.189549 | 1.05E-41 | 2.63E-41 |
| Tmem62    | 1.376719 | 1.06E-41 | 2.66E-41 |
| Rab11fip2 | 0.721953 | 1.23E-41 | 3.08E-41 |
| Frat2     | 1.444071 | 1.26E-41 | 3.16E-41 |
| Gm37818   | 3.00509  | 1.42E-41 | 3.55E-41 |
| Fancm     | 1.510432 | 1.44E-41 | 3.61E-41 |
| Aste1     | 1.224846 | 1.59E-41 | 3.98E-41 |
| Tfcp2     | 0.974155 | 1.62E-41 | 4.05E-41 |
| Mtf2      | 0.650042 | 1.73E-41 | 4.33E-41 |
| Ddb2      | 1.289493 | 1.75E-41 | 4.39E-41 |
| Gm3625    | 1.676521 | 1.90E-41 | 4.77E-41 |
| Gm37215   | 1.926744 | 1.93E-41 | 4.82E-41 |
| Auh       | 0.776828 | 1.92E-41 | 4.81E-41 |
| Ccnk      | 0.797895 | 1.92E-41 | 4.80E-41 |
| Frat1     | 1.678229 | 1.97E-41 | 4.93E-41 |
| Zfp729a   | 1.018831 | 2.16E-41 | 5.39E-41 |
| Morc3     | 0.755135 | 2.17E-41 | 5.43E-41 |
| Gm43273   | 3.580108 | 2.65E-41 | 6.62E-41 |
| Gm17066   | 1.132007 | 2.31E-41 | 5.78E-41 |
| Dolk      | 1.003118 | 2.51E-41 | 6.26E-41 |
| Mbip      | 0.879397 | 2.63E-41 | 6.56E-41 |
| Gt(ROSA)2 | 0.606559 | 2.88E-41 | 7.20E-41 |
| Tdp2      | 0.872565 | 2.89E-41 | 7.21E-41 |
| Mtg2      | 0.991    | 2.96E-41 | 7.38E-41 |
| Zfp606    | 0.928936 | 3.16E-41 | 7.88E-41 |
| Pgam5     | 1.100183 | 3.44E-41 | 8.59E-41 |
| Lrrcc1    | 0.759406 | 3.61E-41 | 9.00E-41 |
| Mettl17   | 1.199026 | 3.83E-41 | 9.54E-41 |
| Mia2      | 0.619391 | 4.01E-41 | 9.98E-41 |
| Gm37931   | 2.596845 | 4.51E-41 | 1.12E-40 |
| Gm37802   | 2.753301 | 4.83E-41 | 1.20E-40 |
| Zfp869    | 0.727836 | 4.52E-41 | 1.13E-40 |
| Fbxo33    | 0.815471 | 4.55E-41 | 1.13E-40 |
| Gm36955   | 2.264701 | 5.00E-41 | 1.24E-40 |
| 5730480H  | 1.050087 | 4.71E-41 | 1.17E-40 |
| Snx32     | 1.03218  | 5.59E-41 | 1.39E-40 |
| Cbx3      | 0.393217 | 5.79E-41 | 1.44E-40 |
| Blcap     | 0.851605 | 7.48E-41 | 1.86E-40 |
| Slc7a6    | 1.632062 | 7.69E-41 | 1.91E-40 |
| Gm43980   | 1.843478 | 8.11E-41 | 2.01E-40 |
| Cacfd1    | 0.819073 | 7.72E-41 | 1.92E-40 |
| Coil      | 1.247741 | 7.96E-41 | 1.98E-40 |
| Gm33366   | 1.94493  | 8.36E-41 | 2.08E-40 |
| Tmem38b   | 0.907539 | 8.14E-41 | 2.02E-40 |

|          |          |          |          |
|----------|----------|----------|----------|
| Riok2    | 0.915974 | 8.44E-41 | 2.09E-40 |
| Fdxr     | 1.192915 | 9.63E-41 | 2.39E-40 |
| Sec14l1  | 0.459976 | 1.05E-40 | 2.61E-40 |
| Gm12940  | 1.081523 | 1.04E-40 | 2.57E-40 |
| Pigb     | 1.438592 | 1.35E-40 | 3.35E-40 |
| Sccpdh   | 0.846413 | 1.34E-40 | 3.33E-40 |
| Nbas     | 1.038644 | 1.41E-40 | 3.49E-40 |
| Zfp874b  | 1.114263 | 1.48E-40 | 3.68E-40 |
| Psmd8    | 0.462034 | 1.69E-40 | 4.17E-40 |
| Zc3h14   | 0.574435 | 1.77E-40 | 4.39E-40 |
| Nhlrc1   | 1.706754 | 1.80E-40 | 4.46E-40 |
| Zfp143   | 0.949257 | 2.18E-40 | 5.39E-40 |
| Ntng2    | 2.564061 | 2.47E-40 | 6.11E-40 |
| Gm12059  | 2.103276 | 2.51E-40 | 6.20E-40 |
| Katnal1  | 1.033345 | 2.61E-40 | 6.45E-40 |
| Gm45182  | 1.724168 | 2.72E-40 | 6.73E-40 |
| Pcyt1b   | 1.520362 | 2.76E-40 | 6.83E-40 |
| Dusp11   | 0.43019  | 2.85E-40 | 7.04E-40 |
| Nifk     | 0.800607 | 3.05E-40 | 7.52E-40 |
| Uhrf1bp1 | 1.218942 | 3.06E-40 | 7.55E-40 |
| Sf3a2    | 0.73659  | 3.33E-40 | 8.21E-40 |
| Inpp1    | 0.625969 | 3.37E-40 | 8.31E-40 |
| 8430422N | 1.638477 | 3.69E-40 | 9.11E-40 |
| Gphn     | 0.798819 | 3.75E-40 | 9.24E-40 |
| Ndufb1   | 0.381175 | 3.94E-40 | 9.71E-40 |
| Tcaim    | 1.031575 | 4.26E-40 | 1.05E-39 |
| Ap5s1    | 1.37876  | 4.32E-40 | 1.06E-39 |
| D030056L | 0.788888 | 4.53E-40 | 1.12E-39 |
| Zfp94    | 1.798724 | 5.83E-40 | 1.44E-39 |
| Itpa     | 0.782748 | 5.57E-40 | 1.37E-39 |
| Bag4     | 0.834012 | 5.62E-40 | 1.38E-39 |
| Tsr1     | 1.438953 | 5.72E-40 | 1.41E-39 |
| Rad51ap2 | 3.27899  | 6.59E-40 | 1.62E-39 |
| Marchf5  | 0.574576 | 6.02E-40 | 1.48E-39 |
| Oxld1    | 1.248685 | 6.04E-40 | 1.49E-39 |
| Chkb     | 0.997703 | 6.06E-40 | 1.49E-39 |
| Timm17a  | 0.519638 | 6.14E-40 | 1.51E-39 |
| Nfyc     | 0.848922 | 6.44E-40 | 1.58E-39 |
| Smim24   | 1.807065 | 6.72E-40 | 1.65E-39 |
| Xpo4     | 0.711877 | 6.58E-40 | 1.62E-39 |
| Ksr2     | 2.063773 | 7.08E-40 | 1.74E-39 |
| 4930453N | 0.668472 | 7.07E-40 | 1.74E-39 |
| Trappc12 | 0.883296 | 7.23E-40 | 1.78E-39 |
| Cfap53   | 2.653235 | 8.45E-40 | 2.08E-39 |
| St7l     | 0.784689 | 8.34E-40 | 2.05E-39 |
| 4930572G | 3.097247 | 1.04E-39 | 2.56E-39 |
| BC024063 | 2.32764  | 1.07E-39 | 2.63E-39 |

|           |          |          |          |
|-----------|----------|----------|----------|
| Snhg14    | 0.959564 | 1.07E-39 | 2.63E-39 |
| Zswim5    | 1.620197 | 1.12E-39 | 2.74E-39 |
| Mid1ip1   | 0.698267 | 1.12E-39 | 2.74E-39 |
| Nfx1      | 0.651302 | 1.13E-39 | 2.76E-39 |
| Gm28693   | 2.176536 | 1.23E-39 | 3.02E-39 |
| B4galt3   | 0.928151 | 1.29E-39 | 3.16E-39 |
| Golm2     | 0.797169 | 1.34E-39 | 3.28E-39 |
| Gabarapl1 | 0.450443 | 1.37E-39 | 3.36E-39 |
| AA465934  | 1.637929 | 1.42E-39 | 3.48E-39 |
| Dtymk     | 0.720826 | 1.42E-39 | 3.48E-39 |
| 2310057M  | 1.046639 | 1.44E-39 | 3.53E-39 |
| Polr1f    | 0.683754 | 1.55E-39 | 3.79E-39 |
| Slc6a9    | 1.437401 | 1.56E-39 | 3.82E-39 |
| Tkfc      | 1.689512 | 1.60E-39 | 3.92E-39 |
| Gm33056   | 3.659947 | 1.84E-39 | 4.51E-39 |
| Hexim2    | 1.657823 | 1.60E-39 | 3.90E-39 |
| Snrpa1    | 0.656172 | 1.83E-39 | 4.46E-39 |
| Thoc3     | 0.771262 | 1.83E-39 | 4.48E-39 |
| Stk11ip   | 1.482859 | 1.90E-39 | 4.65E-39 |
| Dus2      | 1.211861 | 1.89E-39 | 4.62E-39 |
| Atp5a1    | 0.332424 | 1.96E-39 | 4.78E-39 |
| Emc6      | 0.531209 | 2.14E-39 | 5.22E-39 |
| Tcp11l1   | 1.308658 | 2.40E-39 | 5.86E-39 |
| 2810405F  | 1.598075 | 2.67E-39 | 6.52E-39 |
| Bbip1     | 0.489656 | 3.05E-39 | 7.43E-39 |
| Ptcd3     | 0.879795 | 3.11E-39 | 7.59E-39 |
| Mtln      | 0.538467 | 3.20E-39 | 7.81E-39 |
| A530017D  | 1.113627 | 3.21E-39 | 7.82E-39 |
| Nudt21    | 0.629052 | 3.30E-39 | 8.04E-39 |
| Slc18b1   | 1.308971 | 3.88E-39 | 9.46E-39 |
| Adrb1     | 1.177506 | 3.92E-39 | 9.55E-39 |
| Nfil3     | 1.757369 | 4.22E-39 | 1.03E-38 |
| Tusc2     | 0.772998 | 4.11E-39 | 1.00E-38 |
| Gm42895   | 1.987966 | 4.47E-39 | 1.09E-38 |
| Thada     | 1.125285 | 4.29E-39 | 1.04E-38 |
| Ccnt2     | 0.584309 | 4.70E-39 | 1.14E-38 |
| Tbc1d7    | 1.174933 | 5.11E-39 | 1.24E-38 |
| Them4     | 1.060056 | 5.26E-39 | 1.28E-38 |
| Sar1b     | 0.508828 | 5.50E-39 | 1.34E-38 |
| Rexo1     | 0.637879 | 5.59E-39 | 1.36E-38 |
| Arhgap33  | 1.655128 | 5.81E-39 | 1.41E-38 |
| Tnks      | 0.626201 | 6.06E-39 | 1.47E-38 |
| Gm48855   | 1.87518  | 7.10E-39 | 1.72E-38 |
| Snrpd1    | 0.460035 | 7.20E-39 | 1.75E-38 |
| Bnip1     | 1.128779 | 7.15E-39 | 1.74E-38 |
| Ddx19b    | 1.275534 | 7.34E-39 | 1.78E-38 |
| Atp6ap2   | 0.526763 | 7.70E-39 | 1.87E-38 |



|          |          |          |          |
|----------|----------|----------|----------|
| Cox19    | 0.752779 | 7.82E-39 | 1.90E-38 |
| Gm13787  | 4.580282 | 1.05E-38 | 2.54E-38 |
| MIh1     | 1.247404 | 8.32E-39 | 2.02E-38 |
| Cln3     | 1.120413 | 9.21E-39 | 2.23E-38 |
| Rpp21    | 0.593907 | 9.99E-39 | 2.42E-38 |
| Mob4     | 0.492352 | 1.08E-38 | 2.62E-38 |
| Gm45871  | 1.354478 | 1.09E-38 | 2.64E-38 |
| Gm15520  | 3.066975 | 1.38E-38 | 3.34E-38 |
| Slc35e3  | 1.242171 | 1.28E-38 | 3.10E-38 |
| Tasor    | 0.453698 | 1.37E-38 | 3.30E-38 |
| 6330408N | 2.243924 | 1.47E-38 | 3.56E-38 |
| Stradb   | 1.113453 | 1.42E-38 | 3.42E-38 |
| Kpna6    | 0.723456 | 1.49E-38 | 3.59E-38 |
| Gm31166  | 1.762597 | 1.55E-38 | 3.75E-38 |
| Bod1l    | 0.425056 | 1.64E-38 | 3.96E-38 |
| Abca5    | 0.691255 | 1.71E-38 | 4.13E-38 |
| Alkbh8   | 0.812032 | 1.79E-38 | 4.32E-38 |
| Tmem186  | 1.279452 | 1.96E-38 | 4.72E-38 |
| Gm37334  | 1.39408  | 1.99E-38 | 4.79E-38 |
| Fam168a  | 0.470239 | 2.14E-38 | 5.14E-38 |
| Klhdc10  | 0.789888 | 2.29E-38 | 5.51E-38 |
| Pycl     | 1.014903 | 2.43E-38 | 5.84E-38 |
| Gm42445  | 2.710221 | 2.59E-38 | 6.24E-38 |
| Usp32    | 0.651582 | 2.75E-38 | 6.62E-38 |
| Lpin1    | 0.762883 | 2.75E-38 | 6.62E-38 |
| Eif1ad   | 0.680938 | 2.77E-38 | 6.67E-38 |
| Yrdc     | 0.802244 | 2.77E-38 | 6.66E-38 |
| Zfp426   | 0.968304 | 2.95E-38 | 7.08E-38 |
| Dnajc21  | 0.607448 | 2.96E-38 | 7.12E-38 |
| Nudt13   | 0.871652 | 2.97E-38 | 7.13E-38 |
| Abhd10   | 0.94445  | 3.05E-38 | 7.32E-38 |
| Ubac1    | 0.794131 | 3.49E-38 | 8.38E-38 |
| Gm20604  | 1.113391 | 3.59E-38 | 8.62E-38 |
| C920021L | 1.729429 | 3.71E-38 | 8.91E-38 |
| Rarb     | 1.711465 | 4.04E-38 | 9.69E-38 |
| Exosc4   | 0.69574  | 4.14E-38 | 9.91E-38 |
| Bcas2    | 0.462412 | 4.51E-38 | 1.08E-37 |
| Atf6     | 0.716487 | 4.84E-38 | 1.16E-37 |
| Kat6b    | 0.55301  | 5.07E-38 | 1.21E-37 |
| Gm48062  | 1.49962  | 5.27E-38 | 1.26E-37 |
| 2310047D | 2.610403 | 6.68E-38 | 1.60E-37 |
| Ccnc     | 0.816767 | 6.45E-38 | 1.54E-37 |
| Cep20    | 0.672726 | 6.96E-38 | 1.66E-37 |
| Iqsec1   | 0.560887 | 7.15E-38 | 1.71E-37 |
| Gdap1l1  | 1.891247 | 7.20E-38 | 1.72E-37 |
| Gm42755  | 4.233985 | 9.07E-38 | 2.16E-37 |
| Tsr3     | 0.830173 | 7.55E-38 | 1.80E-37 |

|           |          |          |          |
|-----------|----------|----------|----------|
| Zfp184    | 2.019085 | 8.11E-38 | 1.94E-37 |
| Klhl21    | 0.956396 | 8.09E-38 | 1.93E-37 |
| Naa25     | 0.873586 | 8.16E-38 | 1.95E-37 |
| Gm19466   | 4.01498  | 1.02E-37 | 2.43E-37 |
| Supt16    | 0.478594 | 8.49E-38 | 2.03E-37 |
| Lin28a    | 2.920775 | 9.66E-38 | 2.30E-37 |
| Gm37240   | 2.640137 | 8.94E-38 | 2.13E-37 |
| Satb1     | 1.354958 | 8.77E-38 | 2.09E-37 |
| Irf2bp1   | 0.687047 | 8.84E-38 | 2.11E-37 |
| Timm8b    | 0.442448 | 9.28E-38 | 2.21E-37 |
| Mbtd1     | 0.683279 | 9.19E-38 | 2.19E-37 |
| Fxn       | 1.134211 | 9.38E-38 | 2.24E-37 |
| Gm3081    | 1.794752 | 9.66E-38 | 2.30E-37 |
| Kmt5b     | 0.50809  | 1.01E-37 | 2.41E-37 |
| Gm42517   | 2.403981 | 1.10E-37 | 2.63E-37 |
| Fancg     | 1.874964 | 1.08E-37 | 2.58E-37 |
| Gm27032   | 1.81679  | 1.10E-37 | 2.63E-37 |
| Ehmt1     | 0.553149 | 1.22E-37 | 2.91E-37 |
| Tmem11    | 0.7129   | 1.26E-37 | 3.00E-37 |
| D230022Jc | 2.479512 | 1.39E-37 | 3.30E-37 |
| Hnrnpa1   | 0.401394 | 1.30E-37 | 3.10E-37 |
| Gtf3c1    | 0.65529  | 1.30E-37 | 3.09E-37 |
| Reps1     | 0.921847 | 1.41E-37 | 3.35E-37 |
| Gm37090   | 1.572827 | 1.51E-37 | 3.58E-37 |
| Dbt       | 1.148805 | 1.79E-37 | 4.25E-37 |
| Shroom2   | 0.744056 | 1.81E-37 | 4.31E-37 |
| Tceanc    | 1.530945 | 1.93E-37 | 4.58E-37 |
| Ppt2      | 0.725401 | 1.93E-37 | 4.58E-37 |
| Ccl25     | 1.013167 | 1.95E-37 | 4.62E-37 |
| Rbm34     | 0.761    | 1.98E-37 | 4.70E-37 |
| Ccp110    | 0.774755 | 2.03E-37 | 4.83E-37 |
| Pkp2      | 1.295357 | 2.35E-37 | 5.57E-37 |
| Rad17     | 0.709156 | 2.50E-37 | 5.92E-37 |
| Ino80     | 0.741281 | 2.58E-37 | 6.11E-37 |
| Alg2      | 0.861165 | 3.08E-37 | 7.30E-37 |
| Gnl2      | 0.778482 | 3.24E-37 | 7.67E-37 |
| Asl       | 0.892988 | 3.37E-37 | 7.98E-37 |
| Mrps2     | 1.173636 | 3.72E-37 | 8.81E-37 |
| Ilf3      | 0.615549 | 3.78E-37 | 8.93E-37 |
| Cfap74    | 2.254858 | 3.94E-37 | 9.32E-37 |
| Ddi2      | 0.583295 | 3.97E-37 | 9.39E-37 |
| Gm38374   | 1.775323 | 4.20E-37 | 9.93E-37 |
| Zc3h8     | 1.125786 | 4.17E-37 | 9.86E-37 |
| Kbtbd7    | 0.97128  | 4.59E-37 | 1.08E-36 |
| Epc2      | 0.58014  | 4.64E-37 | 1.10E-36 |
| Ccdc57    | 1.803547 | 4.78E-37 | 1.13E-36 |
| Camkmt    | 1.340169 | 5.20E-37 | 1.23E-36 |

|           |          |          |          |
|-----------|----------|----------|----------|
| Sde2      | 0.596779 | 5.20E-37 | 1.23E-36 |
| Zfp775    | 1.19414  | 5.19E-37 | 1.22E-36 |
| Ago4      | 1.024659 | 5.49E-37 | 1.30E-36 |
| Hnrnpab   | 0.416952 | 6.09E-37 | 1.44E-36 |
| Tnpo2     | 0.859749 | 6.27E-37 | 1.48E-36 |
| Vps37b    | 0.700464 | 6.35E-37 | 1.50E-36 |
| Otub2     | 1.677385 | 6.49E-37 | 1.53E-36 |
| Ndufb9    | 0.336521 | 6.80E-37 | 1.60E-36 |
| Iars      | 0.856476 | 6.79E-37 | 1.60E-36 |
| Rchy1     | 0.597245 | 6.82E-37 | 1.60E-36 |
| Sdf2      | 0.529314 | 7.06E-37 | 1.66E-36 |
| Npat      | 0.812937 | 7.38E-37 | 1.74E-36 |
| Dctpp1    | 0.801166 | 7.65E-37 | 1.80E-36 |
| Zfp868    | 1.136338 | 8.56E-37 | 2.01E-36 |
| Raxos1    | 1.775022 | 9.35E-37 | 2.20E-36 |
| Top1mt    | 1.331483 | 9.29E-37 | 2.18E-36 |
| Rps11-ps2 | 1.400777 | 9.80E-37 | 2.30E-36 |
| Cdc5l     | 0.500316 | 1.01E-36 | 2.38E-36 |
| Med22     | 0.848615 | 1.13E-36 | 2.64E-36 |
| Slc30a9   | 0.553396 | 1.24E-36 | 2.92E-36 |
| Mphosph1  | 0.660765 | 1.25E-36 | 2.93E-36 |
| Ipo13     | 1.026748 | 1.26E-36 | 2.95E-36 |
| Smarca5   | 0.44162  | 1.38E-36 | 3.23E-36 |
| Exoc1     | 0.771088 | 1.55E-36 | 3.63E-36 |
| Crebrf    | 0.445521 | 1.62E-36 | 3.78E-36 |
| Gm42697   | 3.389725 | 2.04E-36 | 4.78E-36 |
| Nscme3l   | 2.394746 | 1.97E-36 | 4.61E-36 |
| Gm6712    | 1.882438 | 1.96E-36 | 4.59E-36 |
| Nupr1l    | 1.271519 | 2.05E-36 | 4.80E-36 |
| Ciao3     | 1.038122 | 2.06E-36 | 4.81E-36 |
| Zfp930    | 1.193398 | 2.09E-36 | 4.88E-36 |
| Carnmt1   | 0.765606 | 2.21E-36 | 5.17E-36 |
| Slx4      | 1.265969 | 2.51E-36 | 5.86E-36 |
| Abl2      | 0.783665 | 2.51E-36 | 5.86E-36 |
| Zfp2      | 1.257846 | 2.52E-36 | 5.88E-36 |
| Anapc15   | 1.027656 | 2.56E-36 | 5.97E-36 |
| Rbm4      | 1.531895 | 2.65E-36 | 6.19E-36 |
| Mrps26    | 0.573449 | 2.84E-36 | 6.63E-36 |
| Gadd45gip | 0.593978 | 2.94E-36 | 6.86E-36 |
| Clic6     | 2.116054 | 3.15E-36 | 7.34E-36 |
| Mad2l1    | 1.276409 | 3.13E-36 | 7.29E-36 |
| Zc3h18    | 0.632371 | 3.16E-36 | 7.38E-36 |
| Gm37254   | 1.060447 | 3.42E-36 | 7.97E-36 |
| Emc4      | 0.516433 | 3.72E-36 | 8.68E-36 |
| Zfp850    | 1.911471 | 3.92E-36 | 9.13E-36 |
| Alkbh4    | 1.46256  | 3.82E-36 | 8.89E-36 |
| Gm17354   | 1.441203 | 3.84E-36 | 8.94E-36 |

|           |          |          |          |
|-----------|----------|----------|----------|
| Crcp      | 0.907541 | 4.09E-36 | 9.52E-36 |
| 9930120I1 | 1.79946  | 4.30E-36 | 1.00E-35 |
| Agbl5     | 1.298508 | 4.45E-36 | 1.04E-35 |
| Trib1     | 0.868081 | 4.57E-36 | 1.06E-35 |
| Phrf1     | 0.657664 | 4.64E-36 | 1.08E-35 |
| Atg4b     | 0.759169 | 4.78E-36 | 1.11E-35 |
| Tex30     | 1.046182 | 4.98E-36 | 1.16E-35 |
| Tank      | 0.898823 | 6.19E-36 | 1.44E-35 |
| Aars2     | 1.397552 | 6.38E-36 | 1.48E-35 |
| Thap6     | 1.817724 | 6.53E-36 | 1.52E-35 |
| Gm37268   | 3.10762  | 7.48E-36 | 1.73E-35 |
| Fam228b   | 1.909866 | 6.80E-36 | 1.58E-35 |
| Zfp653    | 1.199711 | 7.03E-36 | 1.63E-35 |
| Gnl1      | 0.680071 | 7.35E-36 | 1.71E-35 |
| Ahctf1    | 0.600302 | 7.45E-36 | 1.73E-35 |
| Zcchc4    | 1.124559 | 7.84E-36 | 1.82E-35 |
| Mrps36    | 0.587799 | 8.31E-36 | 1.92E-35 |
| Fam174c   | 1.229116 | 8.94E-36 | 2.07E-35 |
| Pfdn6     | 0.483042 | 9.20E-36 | 2.13E-35 |
| 4833421G  | 2.30899  | 9.93E-36 | 2.30E-35 |
| Ubxn2a    | 0.471862 | 9.74E-36 | 2.25E-35 |
| Zfp97     | 2.040983 | 9.96E-36 | 2.31E-35 |
| Zfp667    | 1.140945 | 1.05E-35 | 2.44E-35 |
| Rnf24     | 1.30087  | 1.05E-35 | 2.44E-35 |
| Dock7     | 0.849311 | 1.13E-35 | 2.61E-35 |
| Hfm1      | 3.355887 | 1.33E-35 | 3.08E-35 |
| Hnrnpul1  | 0.474869 | 1.19E-35 | 2.75E-35 |
| Rabif     | 0.874173 | 1.18E-35 | 2.74E-35 |
| Lactb2    | 0.852143 | 1.21E-35 | 2.80E-35 |
| 4933434E  | 0.667087 | 1.23E-35 | 2.83E-35 |
| Mrps10    | 0.740152 | 1.23E-35 | 2.85E-35 |
| Rpe       | 0.888813 | 1.34E-35 | 3.09E-35 |
| Rny3      | 1.431915 | 1.35E-35 | 3.12E-35 |
| Ndufa12   | 0.489446 | 1.38E-35 | 3.19E-35 |
| Fancf     | 1.540732 | 1.46E-35 | 3.37E-35 |
| Rrp7a     | 0.80493  | 1.50E-35 | 3.46E-35 |
| Mocs3     | 1.460432 | 1.74E-35 | 4.00E-35 |
| Eipr1     | 1.086655 | 1.80E-35 | 4.15E-35 |
| Armt1     | 1.139064 | 1.88E-35 | 4.34E-35 |
| Zbtb49    | 1.5354   | 1.96E-35 | 4.53E-35 |
| Eny2      | 0.477186 | 1.96E-35 | 4.52E-35 |
| Gm7467    | 1.581158 | 2.16E-35 | 4.97E-35 |
| Fbxl12os  | 2.286657 | 2.33E-35 | 5.36E-35 |
| Zbtb43    | 0.839626 | 2.20E-35 | 5.07E-35 |
| Tmem87a   | 0.834842 | 2.46E-35 | 5.66E-35 |
| Cherp     | 0.762956 | 2.68E-35 | 6.17E-35 |
| 5330439Kl | 2.211147 | 2.81E-35 | 6.47E-35 |

|          |          |          |          |
|----------|----------|----------|----------|
| Zfp180   | 0.816444 | 2.79E-35 | 6.42E-35 |
| Gm38359  | 2.466669 | 3.01E-35 | 6.91E-35 |
| Dleu2    | 0.598599 | 3.09E-35 | 7.11E-35 |
| Lbh      | 0.489243 | 3.20E-35 | 7.34E-35 |
| Taf1a    | 1.176317 | 3.14E-35 | 7.21E-35 |
| Ttc3     | 0.389521 | 3.26E-35 | 7.49E-35 |
| Crnkl1   | 0.701654 | 3.32E-35 | 7.62E-35 |
| 4930579G | 1.700308 | 3.46E-35 | 7.94E-35 |
| Plekhg4  | 2.511993 | 3.59E-35 | 8.24E-35 |
| Dhx9     | 0.500636 | 3.89E-35 | 8.92E-35 |
| Wdr73    | 1.16491  | 3.97E-35 | 9.12E-35 |
| Gm26672  | 1.606218 | 4.37E-35 | 1.00E-34 |
| Rngtt    | 0.919637 | 4.81E-35 | 1.10E-34 |
| Ripk4    | 2.609931 | 5.62E-35 | 1.29E-34 |
| Bmi1     | 0.618618 | 5.59E-35 | 1.28E-34 |
| Gm43200  | 1.662109 | 5.69E-35 | 1.30E-34 |
| Mak16    | 0.752429 | 5.64E-35 | 1.29E-34 |
| Gm43339  | 1.612211 | 6.56E-35 | 1.50E-34 |
| Setd4    | 1.676485 | 6.67E-35 | 1.53E-34 |
| Fam120c  | 1.253241 | 6.68E-35 | 1.53E-34 |
| Nrg2     | 1.888655 | 6.90E-35 | 1.58E-34 |
| Exd2     | 0.963113 | 7.03E-35 | 1.61E-34 |
| Tent4a   | 0.86442  | 7.16E-35 | 1.64E-34 |
| Ubiad1   | 1.61024  | 7.54E-35 | 1.72E-34 |
| Trib3    | 1.295923 | 8.31E-35 | 1.90E-34 |
| Tsfm     | 0.799758 | 8.42E-35 | 1.92E-34 |
| P2rx5    | 2.235501 | 8.79E-35 | 2.01E-34 |
| Birc6    | 0.407937 | 8.99E-35 | 2.05E-34 |
| Zfp942   | 0.961195 | 8.84E-35 | 2.02E-34 |
| Tma16    | 1.013504 | 8.89E-35 | 2.03E-34 |
| Ikkip    | 0.620137 | 9.36E-35 | 2.14E-34 |
| Atp5pb   | 0.33406  | 9.76E-35 | 2.23E-34 |
| Gla      | 1.264943 | 9.67E-35 | 2.21E-34 |
| Gm10766  | 2.152749 | 1.05E-34 | 2.39E-34 |
| Gm13216  | 4.241822 | 1.32E-34 | 3.01E-34 |
| E2f4     | 0.744236 | 1.08E-34 | 2.46E-34 |
| Inip     | 0.924678 | 1.08E-34 | 2.46E-34 |
| Fyttd1   | 0.500291 | 1.32E-34 | 3.02E-34 |
| G6pdx    | 0.92425  | 1.43E-34 | 3.25E-34 |
| Gm48298  | 2.376385 | 1.76E-34 | 4.00E-34 |
| Gm37349  | 1.894963 | 1.88E-34 | 4.28E-34 |
| 4833408A | 1.693918 | 1.90E-34 | 4.32E-34 |
| Gm48128  | 4.07698  | 2.55E-34 | 5.78E-34 |
| A730011C | 2.112811 | 2.14E-34 | 4.86E-34 |
| Scamp2   | 0.654803 | 2.09E-34 | 4.75E-34 |
| Pofut1   | 0.726312 | 2.10E-34 | 4.78E-34 |
| Borcs7   | 0.720155 | 2.16E-34 | 4.90E-34 |

|          |          |          |          |
|----------|----------|----------|----------|
| Ube3a    | 0.365128 | 2.18E-34 | 4.95E-34 |
| H4c14    | 1.763142 | 2.27E-34 | 5.15E-34 |
| Mrpl18   | 0.508093 | 2.22E-34 | 5.04E-34 |
| Mblac2   | 1.095261 | 2.32E-34 | 5.27E-34 |
| Zfp960   | 1.727528 | 2.41E-34 | 5.47E-34 |
| Huwe1    | 0.397049 | 2.45E-34 | 5.56E-34 |
| Ndufaf6  | 1.282062 | 2.43E-34 | 5.52E-34 |
| Caap1    | 0.81928  | 2.49E-34 | 5.64E-34 |
| Surf6    | 1.021357 | 2.54E-34 | 5.75E-34 |
| Sap30bp  | 0.731466 | 2.55E-34 | 5.78E-34 |
| Retreg1  | 0.933815 | 2.66E-34 | 6.02E-34 |
| Cpsf2    | 0.65189  | 2.72E-34 | 6.17E-34 |
| Tyms     | 1.149084 | 2.74E-34 | 6.20E-34 |
| Acox1    | 3.07322  | 2.91E-34 | 6.59E-34 |
| B020010K | 1.549128 | 2.86E-34 | 6.48E-34 |
| Gm38366  | 1.766562 | 2.90E-34 | 6.56E-34 |
| Eral1    | 1.191341 | 2.91E-34 | 6.58E-34 |
| Rttn     | 1.140793 | 3.15E-34 | 7.12E-34 |
| Gm14827  | 2.404512 | 3.29E-34 | 7.44E-34 |
| Ccdc103  | 2.529484 | 3.43E-34 | 7.75E-34 |
| Gm43545  | 2.163059 | 3.85E-34 | 8.70E-34 |
| Nudt5    | 0.714974 | 3.68E-34 | 8.31E-34 |
| Tomm40   | 0.679231 | 3.81E-34 | 8.60E-34 |
| Gm43605  | 3.254934 | 4.14E-34 | 9.35E-34 |
| Gm8557   | 2.029414 | 4.31E-34 | 9.74E-34 |
| Arl8b    | 0.569632 | 4.21E-34 | 9.50E-34 |
| Naa16    | 0.77008  | 4.35E-34 | 9.82E-34 |
| Mcm8     | 1.680245 | 4.38E-34 | 9.89E-34 |
| Aasdh    | 1.286151 | 4.67E-34 | 1.05E-33 |
| Foxj3    | 0.692114 | 5.10E-34 | 1.15E-33 |
| Nap1l2   | 1.947776 | 5.36E-34 | 1.21E-33 |
| Rpusd3   | 1.283414 | 5.76E-34 | 1.30E-33 |
| Fitm2    | 1.105968 | 6.18E-34 | 1.39E-33 |
| Tssc4    | 0.709967 | 6.32E-34 | 1.42E-33 |
| Cmtr2    | 1.666512 | 6.97E-34 | 1.57E-33 |
| Stau2    | 0.801883 | 6.88E-34 | 1.55E-33 |
| Brpf1    | 0.761836 | 6.89E-34 | 1.55E-33 |
| Fkbp1    | 1.288797 | 7.95E-34 | 1.79E-33 |
| Scaper   | 0.595909 | 8.25E-34 | 1.86E-33 |
| Zfp758   | 1.156058 | 8.80E-34 | 1.98E-33 |
| Ing3     | 0.689506 | 9.16E-34 | 2.06E-33 |
| Dph2     | 1.569281 | 9.74E-34 | 2.19E-33 |
| Gtf2h1   | 0.703825 | 1.00E-33 | 2.25E-33 |
| A930014E | 3.876475 | 1.17E-33 | 2.63E-33 |
| Stxbp4   | 0.999049 | 1.04E-33 | 2.34E-33 |
| Rcan3    | 0.712492 | 1.08E-33 | 2.44E-33 |
| Spata33  | 1.780634 | 1.09E-33 | 2.45E-33 |

|           |          |          |          |
|-----------|----------|----------|----------|
| Ccdc189   | 1.728875 | 1.18E-33 | 2.66E-33 |
| Utp25     | 1.031585 | 1.20E-33 | 2.69E-33 |
| Zfp236    | 0.778939 | 1.24E-33 | 2.78E-33 |
| Qrs1      | 1.216619 | 1.26E-33 | 2.84E-33 |
| Srr       | 0.922726 | 1.36E-33 | 3.05E-33 |
| Ankmy2    | 0.705544 | 1.48E-33 | 3.32E-33 |
| Gm43526   | 2.603287 | 1.60E-33 | 3.58E-33 |
| Pogz      | 0.647245 | 1.53E-33 | 3.43E-33 |
| Gulo      | 2.278194 | 1.64E-33 | 3.69E-33 |
| Zc3h6     | 0.678986 | 1.60E-33 | 3.60E-33 |
| Gm20045   | 1.18565  | 1.67E-33 | 3.73E-33 |
| Nxf1      | 0.668488 | 1.87E-33 | 4.19E-33 |
| Gm37060   | 0.753936 | 2.04E-33 | 4.57E-33 |
| Katna1    | 0.765231 | 2.11E-33 | 4.73E-33 |
| Slc17a4   | 4.163793 | 2.51E-33 | 5.60E-33 |
| 5430434F0 | 1.837541 | 2.23E-33 | 4.99E-33 |
| Gm5608    | 4.727507 | 2.79E-33 | 6.24E-33 |
| Tnpo3     | 0.567175 | 2.37E-33 | 5.31E-33 |
| Kat2b     | 0.540925 | 2.40E-33 | 5.37E-33 |
| N4bp2l1   | 1.430873 | 2.41E-33 | 5.40E-33 |
| Gm43201   | 1.643982 | 2.59E-33 | 5.78E-33 |
| Nfatc2ip  | 1.053243 | 2.62E-33 | 5.85E-33 |
| Slc45a4   | 1.135301 | 2.80E-33 | 6.26E-33 |
| Mto1      | 1.071049 | 2.90E-33 | 6.47E-33 |
| Nolc1     | 0.586952 | 3.00E-33 | 6.69E-33 |
| Hipk3     | 0.435318 | 3.09E-33 | 6.90E-33 |
| Fam120b   | 0.734196 | 3.24E-33 | 7.22E-33 |
| Snhg3     | 0.559617 | 3.54E-33 | 7.89E-33 |
| Blm       | 1.289881 | 3.68E-33 | 8.20E-33 |
| 1600020E0 | 0.80261  | 3.90E-33 | 8.68E-33 |
| Hectd4    | 0.661471 | 3.99E-33 | 8.90E-33 |
| Recql     | 1.007385 | 3.97E-33 | 8.86E-33 |
| Ncoa5     | 0.82141  | 4.04E-33 | 8.99E-33 |
| Gm37569   | 1.662523 | 4.18E-33 | 9.31E-33 |
| Plag1     | 1.303123 | 4.42E-33 | 9.84E-33 |
| Nsrp1     | 0.511321 | 4.76E-33 | 1.06E-32 |
| Gm12276   | 1.853772 | 4.79E-33 | 1.07E-32 |
| Smim26    | 0.570057 | 4.90E-33 | 1.09E-32 |
| Cep104    | 0.798155 | 5.00E-33 | 1.11E-32 |
| Gm11532   | 2.348959 | 5.47E-33 | 1.22E-32 |
| 9930104L0 | 0.987626 | 5.23E-33 | 1.16E-32 |
| Dus3l     | 0.862338 | 5.33E-33 | 1.18E-32 |
| E130304I0 | 3.42894  | 5.96E-33 | 1.32E-32 |
| Zfp27     | 1.46673  | 5.49E-33 | 1.22E-32 |
| Gm42611   | 1.351121 | 5.58E-33 | 1.24E-32 |
| Supt6     | 0.50309  | 5.64E-33 | 1.25E-32 |
| Endog     | 0.847017 | 5.61E-33 | 1.25E-32 |

|           |          |          |          |
|-----------|----------|----------|----------|
| U2af2     | 0.49892  | 5.88E-33 | 1.31E-32 |
| Enpp5     | 0.704653 | 6.27E-33 | 1.39E-32 |
| Lins1     | 1.533356 | 7.11E-33 | 1.58E-32 |
| Mterf2    | 1.082547 | 7.14E-33 | 1.58E-32 |
| Zfp637    | 0.681234 | 7.21E-33 | 1.60E-32 |
| Ubr5      | 0.429734 | 7.30E-33 | 1.62E-32 |
| Trnt1     | 0.745527 | 7.37E-33 | 1.64E-32 |
| ENSMUSG   | 4.143954 | 8.81E-33 | 1.95E-32 |
| Csf2ra    | 0.913557 | 7.95E-33 | 1.76E-32 |
| Lrrc27    | 1.956438 | 8.28E-33 | 1.84E-32 |
| 4930518I1 | 1.717853 | 8.37E-33 | 1.86E-32 |
| Atp13a2   | 0.740859 | 8.30E-33 | 1.84E-32 |
| Kdm5d     | 0.864387 | 8.61E-33 | 1.91E-32 |
| Gm42826   | 0.950458 | 9.13E-33 | 2.02E-32 |
| Hmgxb3    | 0.922665 | 1.04E-32 | 2.31E-32 |
| Hlcs      | 0.690226 | 1.05E-32 | 2.32E-32 |
| Cox6a1    | 0.316571 | 1.11E-32 | 2.46E-32 |
| Gm8865    | 2.183332 | 1.23E-32 | 2.73E-32 |
| Xpo6      | 0.729651 | 1.23E-32 | 2.72E-32 |
| Tex264    | 0.601051 | 1.25E-32 | 2.76E-32 |
| Gm48237   | 2.899102 | 1.41E-32 | 3.12E-32 |
| Gm45235   | 2.605218 | 1.45E-32 | 3.20E-32 |
| 4933417C  | 2.363878 | 1.44E-32 | 3.18E-32 |
| Rnf111    | 0.603866 | 1.39E-32 | 3.07E-32 |
| H1f4      | 0.704479 | 1.39E-32 | 3.07E-32 |
| Rmdn1     | 0.86721  | 1.40E-32 | 3.09E-32 |
| Gm43274   | 1.822721 | 1.50E-32 | 3.30E-32 |
| Piga      | 1.277678 | 1.48E-32 | 3.27E-32 |
| Enkur     | 1.815768 | 1.56E-32 | 3.45E-32 |
| Nudcd1    | 1.007711 | 1.56E-32 | 3.45E-32 |
| Kbtbd8    | 1.590189 | 1.60E-32 | 3.54E-32 |
| Tmem143   | 1.30595  | 1.61E-32 | 3.56E-32 |
| Praf2     | 0.778492 | 1.66E-32 | 3.67E-32 |
| Gm30025   | 0.956716 | 1.66E-32 | 3.67E-32 |
| Napa      | 0.505409 | 1.75E-32 | 3.86E-32 |
| Zfp7      | 1.333794 | 1.76E-32 | 3.88E-32 |
| Morn2     | 0.874849 | 1.84E-32 | 4.05E-32 |
| Gm4631    | 1.280108 | 1.85E-32 | 4.08E-32 |
| Gm13583   | 2.959389 | 1.93E-32 | 4.25E-32 |
| Mcm10     | 2.902014 | 2.20E-32 | 4.86E-32 |
| 9330160F  | 1.850151 | 2.31E-32 | 5.10E-32 |
| Spag7     | 0.480584 | 2.30E-32 | 5.07E-32 |
| Cnot10    | 0.638846 | 2.30E-32 | 5.07E-32 |
| Gm26930   | 1.407922 | 2.38E-32 | 5.24E-32 |
| Nelfa     | 0.660866 | 2.37E-32 | 5.22E-32 |
| Kyat3     | 1.318199 | 2.53E-32 | 5.56E-32 |
| Tnfrsf8   | 2.733444 | 2.94E-32 | 6.46E-32 |



|          |          |          |          |
|----------|----------|----------|----------|
| Chd1     | 0.513907 | 2.79E-32 | 6.14E-32 |
| Tmsb15b1 | 1.343896 | 2.93E-32 | 6.45E-32 |
| Srsf11   | 0.353629 | 2.98E-32 | 6.55E-32 |
| E2f5     | 0.755432 | 2.96E-32 | 6.52E-32 |
| Uimc1    | 0.633874 | 3.00E-32 | 6.60E-32 |
| Pals1    | 0.562125 | 3.03E-32 | 6.66E-32 |
| Gm43169  | 4.966911 | 3.68E-32 | 8.07E-32 |
| Sf3b2    | 0.324563 | 3.24E-32 | 7.12E-32 |
| Plekha1  | 0.489788 | 3.34E-32 | 7.35E-32 |
| Dhx29    | 0.772506 | 3.35E-32 | 7.35E-32 |
| N6amt1   | 0.828749 | 3.37E-32 | 7.40E-32 |
| Trmu     | 1.064435 | 3.43E-32 | 7.54E-32 |
| Nf1      | 0.508399 | 3.59E-32 | 7.89E-32 |
| Zcwpw2   | 2.244917 | 3.77E-32 | 8.26E-32 |
| Zyg11b   | 0.524645 | 3.64E-32 | 8.00E-32 |
| Gsdme    | 1.288485 | 3.68E-32 | 8.08E-32 |
| Cwc27    | 0.783285 | 3.96E-32 | 8.69E-32 |
| Mccc1    | 0.958224 | 4.36E-32 | 9.57E-32 |
| Ola1     | 0.604228 | 4.50E-32 | 9.88E-32 |
| Lrp12    | 1.363595 | 4.56E-32 | 9.99E-32 |
| Rpap3    | 0.737091 | 5.01E-32 | 1.10E-31 |
| Slc27a1  | 0.789362 | 5.17E-32 | 1.13E-31 |
| Hmgxb4   | 0.63333  | 5.27E-32 | 1.15E-31 |
| Gm43560  | 1.762343 | 5.38E-32 | 1.18E-31 |
| Tecr     | 0.382949 | 5.45E-32 | 1.19E-31 |
| Polr2b   | 0.591943 | 5.72E-32 | 1.25E-31 |
| Hat1     | 0.777121 | 5.83E-32 | 1.28E-31 |
| Slc7a8   | 0.895823 | 5.88E-32 | 1.29E-31 |
| Ift140   | 1.202046 | 5.95E-32 | 1.30E-31 |
| Hdac4    | 0.720035 | 6.15E-32 | 1.34E-31 |
| Setdb1   | 0.792005 | 6.16E-32 | 1.35E-31 |
| Slc22a28 | 3.442733 | 6.86E-32 | 1.50E-31 |
| 4833420G | 0.558625 | 6.41E-32 | 1.40E-31 |
| Hadhb    | 0.491456 | 6.44E-32 | 1.41E-31 |
| 4732414G | 2.290492 | 6.77E-32 | 1.48E-31 |
| Coro2b   | 0.617497 | 6.60E-32 | 1.44E-31 |
| Ciz1     | 0.698468 | 7.04E-32 | 1.54E-31 |
| Gm43765  | 2.32742  | 7.38E-32 | 1.61E-31 |
| Gm37943  | 2.420456 | 7.59E-32 | 1.66E-31 |
| Sf3a1    | 0.614105 | 7.73E-32 | 1.69E-31 |
| Mbd5     | 0.720971 | 7.75E-32 | 1.69E-31 |
| Rnps1    | 0.492199 | 7.96E-32 | 1.73E-31 |
| Ccdc34   | 0.631138 | 8.09E-32 | 1.76E-31 |
| Telo2    | 1.0938   | 8.13E-32 | 1.77E-31 |
| Lrfrn2   | 2.338003 | 8.64E-32 | 1.88E-31 |
| Map4k5   | 0.608768 | 8.56E-32 | 1.86E-31 |
| Kctd3    | 0.91314  | 8.71E-32 | 1.90E-31 |

|           |          |          |          |
|-----------|----------|----------|----------|
| Mthfsd    | 1.058327 | 9.09E-32 | 1.98E-31 |
| AV356131  | 0.843159 | 9.32E-32 | 2.03E-31 |
| Eif2b4    | 0.740946 | 9.85E-32 | 2.14E-31 |
| Gm16759   | 1.934297 | 1.06E-31 | 2.30E-31 |
| Zfp964    | 1.57205  | 1.05E-31 | 2.28E-31 |
| Nono      | 0.408549 | 1.09E-31 | 2.37E-31 |
| Wrap73    | 0.930175 | 1.11E-31 | 2.41E-31 |
| Gm42727   | 1.530769 | 1.15E-31 | 2.49E-31 |
| Nsun5     | 1.008422 | 1.20E-31 | 2.61E-31 |
| 9430031Kl | 1.714869 | 1.25E-31 | 2.71E-31 |
| Tbce      | 0.803943 | 1.23E-31 | 2.68E-31 |
| Qtrt2     | 1.169622 | 1.24E-31 | 2.70E-31 |
| 1600017P  | 2.585866 | 1.35E-31 | 2.92E-31 |
| Arfgap2   | 0.608998 | 1.31E-31 | 2.85E-31 |
| Creb1     | 0.452859 | 1.36E-31 | 2.94E-31 |
| Ankrd34a  | 1.982801 | 1.52E-31 | 3.29E-31 |
| 2310034G  | 1.507034 | 1.46E-31 | 3.17E-31 |
| Zbtb7b    | 0.981654 | 1.52E-31 | 3.29E-31 |
| Fam210a   | 0.856859 | 1.57E-31 | 3.41E-31 |
| Arglu1    | 0.318579 | 1.62E-31 | 3.50E-31 |
| Trim39    | 0.810219 | 1.63E-31 | 3.53E-31 |
| A730006G  | 3.790692 | 1.91E-31 | 4.13E-31 |
| Mysm1     | 0.49245  | 1.76E-31 | 3.82E-31 |
| Vstm2l    | 1.836106 | 1.83E-31 | 3.96E-31 |
| Fam149b   | 0.769499 | 1.81E-31 | 3.92E-31 |
| Gm44152   | 1.596164 | 1.89E-31 | 4.09E-31 |
| Taf2      | 0.732893 | 1.91E-31 | 4.13E-31 |
| Ybx2      | 2.283622 | 2.04E-31 | 4.41E-31 |
| Bend7     | 0.769576 | 1.95E-31 | 4.22E-31 |
| Zfp326    | 0.513592 | 1.98E-31 | 4.29E-31 |
| Fuom      | 0.818992 | 2.06E-31 | 4.45E-31 |
| Gm42874   | 3.031759 | 2.26E-31 | 4.88E-31 |
| Gm17249   | 1.66085  | 2.12E-31 | 4.58E-31 |
| Pgc       | 1.643665 | 2.18E-31 | 4.72E-31 |
| Srgap3    | 0.664543 | 2.43E-31 | 5.25E-31 |
| Mcrs1     | 0.585129 | 2.51E-31 | 5.42E-31 |
| Klhl15    | 1.056824 | 2.50E-31 | 5.40E-31 |
| Tango6    | 1.181406 | 2.52E-31 | 5.43E-31 |
| Rgs22     | 2.921562 | 2.68E-31 | 5.78E-31 |
| Acot8     | 0.907304 | 2.72E-31 | 5.87E-31 |
| Uqcrfs1   | 0.43063  | 2.76E-31 | 5.95E-31 |
| Magohb    | 0.855052 | 2.74E-31 | 5.90E-31 |
| Nrd1      | 0.413497 | 2.78E-31 | 6.00E-31 |
| 1700007K  | 2.899667 | 3.01E-31 | 6.50E-31 |
| 4930431P  | 1.098495 | 2.79E-31 | 6.01E-31 |
| Xpnpep3   | 0.999159 | 2.86E-31 | 6.18E-31 |
| Aacs      | 1.424604 | 3.47E-31 | 7.47E-31 |

|          |          |          |          |
|----------|----------|----------|----------|
| Uri1     | 0.518507 | 3.91E-31 | 8.41E-31 |
| Mars1    | 0.849833 | 3.92E-31 | 8.44E-31 |
| Gm47370  | 2.73858  | 4.24E-31 | 9.13E-31 |
| Frmd5    | 0.748877 | 4.17E-31 | 8.97E-31 |
| Gm9828   | 1.80883  | 4.52E-31 | 9.73E-31 |
| Rhebl1   | 1.147704 | 4.41E-31 | 9.50E-31 |
| Cmtm4    | 0.678732 | 4.56E-31 | 9.80E-31 |
| Gm43148  | 2.189889 | 4.94E-31 | 1.06E-30 |
| Trmt10c  | 0.811212 | 4.93E-31 | 1.06E-30 |
| Lym4     | 1.105562 | 4.97E-31 | 1.07E-30 |
| Ercc8    | 1.183475 | 5.04E-31 | 1.08E-30 |
| ENSMUSG  | 3.144301 | 5.93E-31 | 1.27E-30 |
| Oxa1l    | 0.636892 | 5.61E-31 | 1.21E-30 |
| Gm8234   | 3.025587 | 6.16E-31 | 1.32E-30 |
| Ptprn2   | 2.620347 | 5.84E-31 | 1.25E-30 |
| Stx19    | 2.450533 | 6.38E-31 | 1.37E-30 |
| Srp54c   | 1.917559 | 6.08E-31 | 1.30E-30 |
| Adat1    | 1.252351 | 6.11E-31 | 1.31E-30 |
| Rbm20    | 1.392827 | 6.14E-31 | 1.32E-30 |
| Nmt1     | 0.47533  | 6.31E-31 | 1.35E-30 |
| Gm43859  | 2.640156 | 6.92E-31 | 1.48E-30 |
| Mrs2     | 0.741692 | 6.56E-31 | 1.41E-30 |
| Ccdc92b  | 2.010262 | 7.15E-31 | 1.53E-30 |
| Zdhhc13  | 1.259596 | 7.12E-31 | 1.53E-30 |
| lqck     | 1.849147 | 7.30E-31 | 1.56E-30 |
| Gm11510  | 1.742169 | 7.80E-31 | 1.67E-30 |
| Fnta     | 0.500597 | 7.73E-31 | 1.66E-30 |
| Asphd2   | 1.871941 | 8.46E-31 | 1.81E-30 |
| Gm37776  | 4.215078 | 9.88E-31 | 2.11E-30 |
| Rpf2     | 1.083944 | 9.15E-31 | 1.96E-30 |
| Mettl5os | 2.148019 | 9.59E-31 | 2.05E-30 |
| Gm47484  | 1.85953  | 9.52E-31 | 2.04E-30 |
| Kctd4    | 2.28141  | 1.09E-30 | 2.34E-30 |
| Eefsec   | 1.000742 | 1.04E-30 | 2.23E-30 |
| Drc3     | 1.853424 | 1.13E-30 | 2.42E-30 |
| Mpc2     | 0.387685 | 1.16E-30 | 2.47E-30 |
| Kat5     | 0.735849 | 1.17E-30 | 2.49E-30 |
| Cep295   | 0.747319 | 1.22E-30 | 2.62E-30 |
| Ccdc62   | 1.531321 | 1.30E-30 | 2.77E-30 |
| Gatad2b  | 0.414298 | 1.34E-30 | 2.86E-30 |
| Rps6ka6  | 2.52638  | 1.36E-30 | 2.90E-30 |
| Pcna     | 0.50358  | 1.45E-30 | 3.09E-30 |
| Ovgp1    | 1.992279 | 1.47E-30 | 3.14E-30 |
| Rfc2     | 0.666634 | 1.47E-30 | 3.13E-30 |
| Tubgcp5  | 0.708787 | 1.51E-30 | 3.23E-30 |
| Gm37233  | 2.190759 | 1.59E-30 | 3.39E-30 |
| Zfp759   | 1.876692 | 1.61E-30 | 3.43E-30 |

|           |          |          |          |
|-----------|----------|----------|----------|
| Gm14302   | 3.161508 | 1.70E-30 | 3.63E-30 |
| Mrps25    | 0.58249  | 1.65E-30 | 3.51E-30 |
| Rfx7      | 0.687345 | 1.75E-30 | 3.74E-30 |
| Lysmd4    | 1.073538 | 1.84E-30 | 3.93E-30 |
| Elmod3    | 1.085763 | 1.88E-30 | 4.02E-30 |
| Aagab     | 0.904387 | 2.18E-30 | 4.64E-30 |
| Ten1      | 0.76586  | 2.30E-30 | 4.90E-30 |
| Hgh1      | 1.479796 | 2.31E-30 | 4.92E-30 |
| 5430416N  | 1.144221 | 2.40E-30 | 5.11E-30 |
| Spats2    | 0.688629 | 2.43E-30 | 5.17E-30 |
| Gm9993    | 1.266601 | 2.43E-30 | 5.17E-30 |
| Gm37788   | 1.010922 | 2.51E-30 | 5.35E-30 |
| Gpx4-ps2  | 0.611622 | 2.57E-30 | 5.46E-30 |
| Gm12992   | 1.625072 | 2.76E-30 | 5.86E-30 |
| 4921507G  | 3.526187 | 2.93E-30 | 6.23E-30 |
| Oxnad1    | 1.102765 | 2.76E-30 | 5.87E-30 |
| Tepp      | 1.792653 | 2.95E-30 | 6.27E-30 |
| Pin1      | 0.496096 | 2.95E-30 | 6.28E-30 |
| AA914427  | 1.866245 | 3.02E-30 | 6.40E-30 |
| Ndufa12-p | 1.508635 | 3.12E-30 | 6.62E-30 |
| Gm44678   | 2.232707 | 3.27E-30 | 6.95E-30 |
| lqank1    | 2.375408 | 3.40E-30 | 7.21E-30 |
| Znhit6    | 0.727286 | 3.36E-30 | 7.14E-30 |
| Gm15601   | 2.750817 | 3.75E-30 | 7.97E-30 |
| Gm15828   | 3.282715 | 4.04E-30 | 8.58E-30 |
| Mrpl45    | 0.748489 | 3.75E-30 | 7.95E-30 |
| Kifc2     | 1.081019 | 3.77E-30 | 8.00E-30 |
| Zfp932    | 0.98409  | 4.03E-30 | 8.55E-30 |
| Tex10     | 0.826621 | 4.05E-30 | 8.59E-30 |
| Tbck      | 0.710418 | 4.15E-30 | 8.80E-30 |
| Snhg16    | 1.104526 | 4.18E-30 | 8.86E-30 |
| Tgds      | 1.113584 | 4.22E-30 | 8.95E-30 |
| Gon4l     | 0.732586 | 4.55E-30 | 9.63E-30 |
| 2700046G  | 1.42318  | 4.58E-30 | 9.71E-30 |
| Clec16a   | 1.030154 | 4.78E-30 | 1.01E-29 |
| Fzd5      | 0.660578 | 4.93E-30 | 1.04E-29 |
| 4930525G  | 2.870803 | 5.36E-30 | 1.13E-29 |
| Hap1      | 0.928888 | 5.12E-30 | 1.08E-29 |
| Eif2b3    | 0.786474 | 5.21E-30 | 1.10E-29 |
| Ankrd11   | 0.332986 | 5.39E-30 | 1.14E-29 |
| Rint1     | 0.811651 | 5.38E-30 | 1.14E-29 |
| Ythdf3    | 0.545679 | 5.71E-30 | 1.21E-29 |
| Prpf3     | 0.793388 | 5.97E-30 | 1.26E-29 |
| Plpp7     | 1.514265 | 6.08E-30 | 1.29E-29 |
| 5530601H  | 0.88504  | 6.08E-30 | 1.28E-29 |
| Zfp518a   | 0.721293 | 6.21E-30 | 1.31E-29 |
| Svip      | 0.713079 | 6.30E-30 | 1.33E-29 |

|           |          |          |          |
|-----------|----------|----------|----------|
| Pcyt2     | 0.826897 | 7.18E-30 | 1.52E-29 |
| E230029C  | 1.324504 | 7.25E-30 | 1.53E-29 |
| 4933433G  | 2.095352 | 7.82E-30 | 1.65E-29 |
| Nob1      | 0.8569   | 8.15E-30 | 1.72E-29 |
| Gm13524   | 2.294632 | 8.46E-30 | 1.78E-29 |
| Ppp1r8    | 0.800779 | 8.26E-30 | 1.74E-29 |
| Mrps11    | 0.656173 | 8.50E-30 | 1.79E-29 |
| Mrps28    | 0.678946 | 8.92E-30 | 1.88E-29 |
| Stamos    | 1.914207 | 9.04E-30 | 1.90E-29 |
| Syngr3    | 1.964131 | 9.17E-30 | 1.93E-29 |
| Nsmce3    | 0.596123 | 9.26E-30 | 1.95E-29 |
| Ppan      | 0.937441 | 9.55E-30 | 2.01E-29 |
| Dhx16     | 0.749492 | 9.86E-30 | 2.08E-29 |
| AA474408  | 2.058285 | 1.07E-29 | 2.25E-29 |
| Mbtps1    | 0.569762 | 1.05E-29 | 2.21E-29 |
| Dennd1a   | 0.609898 | 1.10E-29 | 2.32E-29 |
| Cish      | 1.341965 | 1.11E-29 | 2.34E-29 |
| Glr2      | 0.474023 | 1.13E-29 | 2.39E-29 |
| Igip      | 0.606523 | 1.14E-29 | 2.40E-29 |
| Gm14443   | 2.162087 | 1.19E-29 | 2.50E-29 |
| Retreg2   | 0.498244 | 1.18E-29 | 2.49E-29 |
| Gm16973   | 1.259898 | 1.22E-29 | 2.57E-29 |
| Gm47573   | 2.313935 | 1.36E-29 | 2.85E-29 |
| Wdr43     | 0.601505 | 1.32E-29 | 2.77E-29 |
| Dcaf6     | 0.68067  | 1.38E-29 | 2.89E-29 |
| Dnai3     | 6.276956 | 1.84E-29 | 3.85E-29 |
| Gm6345    | 2.385906 | 1.62E-29 | 3.40E-29 |
| Idh3b     | 0.459725 | 1.73E-29 | 3.63E-29 |
| Ncbp1     | 0.725562 | 1.77E-29 | 3.70E-29 |
| Gm43203   | 2.122658 | 1.91E-29 | 4.00E-29 |
| Crb3      | 2.464346 | 1.91E-29 | 4.00E-29 |
| Cyc1      | 0.416225 | 1.97E-29 | 4.12E-29 |
| Fen1      | 1.0938   | 2.07E-29 | 4.34E-29 |
| Rmnd1     | 1.077807 | 2.23E-29 | 4.66E-29 |
| Selenbp1  | 0.939761 | 2.25E-29 | 4.71E-29 |
| Fus       | 0.290071 | 2.32E-29 | 4.85E-29 |
| Rrp8      | 0.81302  | 2.32E-29 | 4.86E-29 |
| Nsmce4a   | 0.436397 | 2.35E-29 | 4.93E-29 |
| Kif9      | 2.216796 | 2.70E-29 | 5.64E-29 |
| Bloc1s6os | 2.382244 | 2.79E-29 | 5.84E-29 |
| Slc35g1   | 1.98793  | 2.72E-29 | 5.70E-29 |
| Selenos   | 0.474077 | 2.77E-29 | 5.78E-29 |
| Ints7     | 0.948806 | 2.88E-29 | 6.01E-29 |
| Morn1     | 1.8948   | 2.96E-29 | 6.18E-29 |
| B130034C  | 1.79227  | 3.01E-29 | 6.29E-29 |
| Catspere2 | 1.938806 | 3.16E-29 | 6.60E-29 |
| Gm7285    | 1.712898 | 3.59E-29 | 7.50E-29 |

|          |          |          |          |
|----------|----------|----------|----------|
| Dpf2     | 0.545332 | 3.59E-29 | 7.50E-29 |
| Nxt1     | 0.678412 | 3.78E-29 | 7.88E-29 |
| Scrn3    | 0.832246 | 3.79E-29 | 7.92E-29 |
| Rassf7   | 1.45453  | 3.83E-29 | 7.99E-29 |
| Usp20    | 1.023121 | 3.95E-29 | 8.24E-29 |
| Pcgf5    | 0.58435  | 4.28E-29 | 8.91E-29 |
| Uba1     | 0.44736  | 4.41E-29 | 9.19E-29 |
| Ap4e1    | 1.013752 | 4.41E-29 | 9.19E-29 |
| Rpap2    | 0.944904 | 4.46E-29 | 9.29E-29 |
| Gm45718  | 2.046352 | 4.70E-29 | 9.78E-29 |
| Akain1   | 1.489614 | 4.93E-29 | 1.03E-28 |
| Aftph    | 0.464524 | 5.27E-29 | 1.10E-28 |
| Ift46    | 0.764361 | 5.35E-29 | 1.11E-28 |
| Rpp38    | 1.224969 | 5.48E-29 | 1.14E-28 |
| Daglb    | 0.873187 | 5.94E-29 | 1.24E-28 |
| Usp13    | 2.415345 | 6.81E-29 | 1.41E-28 |
| Rnf34    | 0.733447 | 6.67E-29 | 1.39E-28 |
| Rnf2     | 0.68147  | 6.96E-29 | 1.45E-28 |
| Supv3l1  | 1.120793 | 6.96E-29 | 1.45E-28 |
| Champ1   | 0.801139 | 7.22E-29 | 1.50E-28 |
| Xrcc6    | 1.100585 | 7.24E-29 | 1.50E-28 |
| 2810049E | 2.334071 | 7.58E-29 | 1.57E-28 |
| Arhgap35 | 0.618782 | 7.38E-29 | 1.53E-28 |
| Gm49463  | 1.963496 | 7.51E-29 | 1.56E-28 |
| Ap1g1    | 0.550803 | 7.75E-29 | 1.61E-28 |
| Yif1a    | 0.639219 | 7.89E-29 | 1.64E-28 |
| Garem1   | 0.922524 | 7.92E-29 | 1.64E-28 |
| Pfas     | 1.093682 | 8.06E-29 | 1.67E-28 |
| Zfyve19  | 1.005131 | 8.43E-29 | 1.75E-28 |
| Tmem222  | 0.650426 | 9.36E-29 | 1.94E-28 |
| Gm13570  | 1.934169 | 9.88E-29 | 2.05E-28 |
| Fbxo34   | 0.863202 | 9.84E-29 | 2.04E-28 |
| Ccnb2-ps | 2.111014 | 1.07E-28 | 2.21E-28 |
| Acp6     | 1.264838 | 1.03E-28 | 2.14E-28 |
| Foxred2  | 1.739433 | 1.07E-28 | 2.22E-28 |
| Cpeb4    | 0.447222 | 1.09E-28 | 2.27E-28 |
| Gm17021  | 2.075087 | 1.12E-28 | 2.31E-28 |
| Pard6a   | 0.919069 | 1.13E-28 | 2.34E-28 |
| Fundc2   | 0.456502 | 1.14E-28 | 2.37E-28 |
| Zfp101   | 0.872367 | 1.16E-28 | 2.40E-28 |
| Gm45148  | 3.240174 | 1.27E-28 | 2.63E-28 |
| Fam136a  | 0.748185 | 1.21E-28 | 2.51E-28 |
| Trit1    | 1.122826 | 1.22E-28 | 2.53E-28 |
| Rdh14    | 0.700111 | 1.23E-28 | 2.54E-28 |
| Ddx28    | 1.102695 | 1.30E-28 | 2.68E-28 |
| Upf1     | 0.599007 | 1.33E-28 | 2.75E-28 |
| Gm11339  | 3.234686 | 1.48E-28 | 3.05E-28 |

|          |          |          |          |
|----------|----------|----------|----------|
| Baz2a    | 0.46534  | 1.54E-28 | 3.17E-28 |
| Gm16029  | 3.557114 | 1.66E-28 | 3.42E-28 |
| Gm37755  | 2.718714 | 1.67E-28 | 3.45E-28 |
| Lysmd1   | 1.390221 | 1.59E-28 | 3.28E-28 |
| Wfdc3    | 2.884076 | 1.69E-28 | 3.48E-28 |
| Ncoa6    | 0.555922 | 1.64E-28 | 3.38E-28 |
| Ankrd16  | 0.836145 | 1.64E-28 | 3.39E-28 |
| Cfap206  | 2.501218 | 1.72E-28 | 3.54E-28 |
| Pcif1    | 0.461429 | 1.71E-28 | 3.52E-28 |
| Dhdh     | 0.851686 | 1.76E-28 | 3.63E-28 |
| A730063N | 1.227193 | 1.82E-28 | 3.75E-28 |
| Gm37292  | 2.570895 | 1.95E-28 | 4.03E-28 |
| Gm2396   | 3.596993 | 2.04E-28 | 4.21E-28 |
| Vipas39  | 0.818676 | 1.89E-28 | 3.89E-28 |
| Gm45493  | 2.336474 | 2.22E-28 | 4.57E-28 |
| Urod     | 0.601994 | 2.20E-28 | 4.53E-28 |
| Slc11a2  | 0.945991 | 2.27E-28 | 4.68E-28 |
| Lypla2   | 0.657426 | 2.32E-28 | 4.78E-28 |
| Adgrb3   | 1.1556   | 2.36E-28 | 4.86E-28 |
| Ube2v2   | 0.430191 | 2.38E-28 | 4.90E-28 |
| Zfp658   | 1.499613 | 2.50E-28 | 5.15E-28 |
| Smg5     | 0.716234 | 2.93E-28 | 6.01E-28 |
| 4930513N | 1.60913  | 2.96E-28 | 6.07E-28 |
| A930037H | 1.435509 | 3.15E-28 | 6.47E-28 |
| Mrps18b  | 0.852113 | 3.18E-28 | 6.53E-28 |
| Rer1     | 0.405626 | 3.64E-28 | 7.47E-28 |
| Ribc2    | 2.865077 | 3.85E-28 | 7.89E-28 |
| Cyp4f17  | 1.095096 | 3.71E-28 | 7.61E-28 |
| Zbtb21   | 0.819094 | 3.74E-28 | 7.67E-28 |
| Neil2    | 2.216828 | 4.03E-28 | 8.26E-28 |
| C730034F | 1.349949 | 4.03E-28 | 8.26E-28 |
| 0610040B | 1.307455 | 4.37E-28 | 8.94E-28 |
| Pola1    | 0.997682 | 4.38E-28 | 8.96E-28 |
| 2310022A | 1.103676 | 4.52E-28 | 9.25E-28 |
| Ddx19a   | 0.76539  | 4.52E-28 | 9.26E-28 |
| Pthr2    | 0.820388 | 4.53E-28 | 9.27E-28 |
| Nop16    | 0.923247 | 4.69E-28 | 9.60E-28 |
| Med7     | 0.645014 | 4.82E-28 | 9.85E-28 |
| A630089N | 1.720373 | 4.93E-28 | 1.01E-27 |
| Ccdc85c  | 0.725525 | 5.14E-28 | 1.05E-27 |
| Mtres1   | 0.777294 | 5.12E-28 | 1.05E-27 |
| 1700055D | 2.488064 | 5.46E-28 | 1.12E-27 |
| 4930563E | 1.34685  | 5.43E-28 | 1.11E-27 |
| Synv1    | 0.773909 | 5.49E-28 | 1.12E-27 |
| Wrap53   | 1.36937  | 5.87E-28 | 1.20E-27 |
| Gm47525  | 2.861417 | 6.39E-28 | 1.30E-27 |
| Zdhhc23  | 2.453154 | 6.26E-28 | 1.28E-27 |

|           |          |          |          |
|-----------|----------|----------|----------|
| Zfp146    | 1.118487 | 6.54E-28 | 1.33E-27 |
| 170010111 | 2.272424 | 6.76E-28 | 1.38E-27 |
| Gm13722   | 4.404974 | 7.57E-28 | 1.54E-27 |
| Gm16062   | 1.74474  | 7.01E-28 | 1.43E-27 |
| Abcb8     | 1.025468 | 7.05E-28 | 1.44E-27 |
| Cwf1911   | 1.17137  | 7.09E-28 | 1.45E-27 |
| Apba3     | 0.925604 | 7.49E-28 | 1.53E-27 |
| Gm42726   | 1.484741 | 7.61E-28 | 1.55E-27 |
| Ap3d1     | 0.502034 | 7.66E-28 | 1.56E-27 |
| Gm47690   | 2.265355 | 7.90E-28 | 1.61E-27 |
| Dlst      | 0.579285 | 7.74E-28 | 1.58E-27 |
| Gm11940   | 2.757848 | 8.17E-28 | 1.66E-27 |
| Taf12     | 0.646739 | 7.87E-28 | 1.60E-27 |
| Gm37124   | 1.198421 | 7.96E-28 | 1.62E-27 |
| Gnpnat1   | 0.873436 | 8.19E-28 | 1.67E-27 |
| Pex7      | 0.685784 | 8.35E-28 | 1.70E-27 |
| Fzd10     | 2.114937 | 8.59E-28 | 1.75E-27 |
| Cox11     | 0.86187  | 8.59E-28 | 1.75E-27 |
| Zfp958    | 1.018145 | 9.00E-28 | 1.83E-27 |
| Nol7      | 0.33544  | 9.38E-28 | 1.91E-27 |
| Gm48653   | 2.429178 | 1.06E-27 | 2.16E-27 |
| B230317F  | 2.922956 | 1.14E-27 | 2.32E-27 |
| Zfp418    | 1.86563  | 1.14E-27 | 2.31E-27 |
| Gm37598   | 1.157335 | 1.14E-27 | 2.32E-27 |
| Zfp213    | 1.330468 | 1.16E-27 | 2.35E-27 |
| Cdk11b    | 0.400328 | 1.16E-27 | 2.36E-27 |
| Khdc4     | 0.549521 | 1.18E-27 | 2.39E-27 |
| C630004V  | 2.145929 | 1.29E-27 | 2.63E-27 |
| Gm10501   | 1.853464 | 1.32E-27 | 2.67E-27 |
| Ankrd49   | 0.81105  | 1.34E-27 | 2.72E-27 |
| Hipk2     | 0.456098 | 1.37E-27 | 2.77E-27 |
| Zfp110    | 0.673328 | 1.36E-27 | 2.75E-27 |
| Ythdf2    | 0.534495 | 1.37E-27 | 2.78E-27 |
| Tomm70a   | 0.496574 | 1.42E-27 | 2.88E-27 |
| Dtwd1     | 1.162255 | 1.43E-27 | 2.90E-27 |
| D630036H  | 1.967878 | 1.49E-27 | 3.01E-27 |
| 1700120C  | 1.479806 | 1.58E-27 | 3.19E-27 |
| Ogt       | 0.34385  | 1.65E-27 | 3.34E-27 |
| Rfx2      | 1.546422 | 1.66E-27 | 3.36E-27 |
| Pyroxd1   | 0.819129 | 1.71E-27 | 3.45E-27 |
| Gm49159   | 3.34851  | 1.89E-27 | 3.82E-27 |
| Kctd7     | 1.210635 | 1.77E-27 | 3.59E-27 |
| Pmpca     | 0.695429 | 1.78E-27 | 3.60E-27 |
| Slc22a17  | 0.606102 | 1.88E-27 | 3.81E-27 |
| Tmem151   | 1.885434 | 1.94E-27 | 3.92E-27 |
| Hpd1      | 2.863063 | 2.05E-27 | 4.14E-27 |
| Ubr2      | 0.431422 | 2.03E-27 | 4.09E-27 |



|           |          |          |          |
|-----------|----------|----------|----------|
| Tbl2      | 1.094777 | 2.06E-27 | 4.16E-27 |
| Foxk1     | 0.690651 | 2.09E-27 | 4.22E-27 |
| Gle1      | 0.549195 | 2.18E-27 | 4.40E-27 |
| Mcu       | 0.815889 | 2.25E-27 | 4.55E-27 |
| Orc3      | 0.781701 | 2.26E-27 | 4.57E-27 |
| Gm44237   | 1.889676 | 2.31E-27 | 4.65E-27 |
| A930018P  | 2.292078 | 2.44E-27 | 4.92E-27 |
| Isca1     | 0.702524 | 2.48E-27 | 4.99E-27 |
| Wdr41     | 1.027533 | 2.67E-27 | 5.38E-27 |
| Ccsap     | 1.579156 | 2.72E-27 | 5.48E-27 |
| Taf6l     | 1.437319 | 2.78E-27 | 5.61E-27 |
| Cnst      | 0.733209 | 2.92E-27 | 5.88E-27 |
| Alox5ap   | 1.195851 | 3.12E-27 | 6.28E-27 |
| Bloc1s2   | 0.679736 | 3.17E-27 | 6.38E-27 |
| Gm43268   | 1.761225 | 3.22E-27 | 6.48E-27 |
| Api5      | 0.491496 | 3.24E-27 | 6.53E-27 |
| Slc17a2   | 3.812236 | 3.72E-27 | 7.48E-27 |
| Zfp260    | 0.505961 | 3.37E-27 | 6.79E-27 |
| 9430060I0 | 2.025783 | 3.56E-27 | 7.16E-27 |
| 5330439A  | 5.172123 | 4.07E-27 | 8.18E-27 |
| A130012E  | 1.256747 | 3.70E-27 | 7.45E-27 |
| Cep57     | 0.602172 | 3.77E-27 | 7.59E-27 |
| Zfp40     | 0.898979 | 3.90E-27 | 7.85E-27 |
| Wdr89     | 0.78459  | 3.90E-27 | 7.85E-27 |
| Gm41793   | 3.547879 | 4.32E-27 | 8.68E-27 |
| Prmt9     | 0.983327 | 4.07E-27 | 8.18E-27 |
| Thg1l     | 1.60653  | 4.15E-27 | 8.35E-27 |
| Uqcrh     | 0.248449 | 4.24E-27 | 8.51E-27 |
| Gm42462   | 2.316506 | 4.48E-27 | 8.99E-27 |
| Foxred1   | 1.172784 | 4.68E-27 | 9.40E-27 |
| Mrpl20    | 0.376863 | 4.87E-27 | 9.77E-27 |
| Lman1     | 0.345633 | 5.06E-27 | 1.01E-26 |
| Nupl2     | 1.398805 | 5.05E-27 | 1.01E-26 |
| Col26a1   | 2.84851  | 5.43E-27 | 1.09E-26 |
| Fcsk      | 1.189899 | 5.27E-27 | 1.06E-26 |
| Tmem53    | 1.36444  | 5.40E-27 | 1.08E-26 |
| Ube2j2    | 0.541855 | 5.46E-27 | 1.09E-26 |
| CamI      | 0.531999 | 5.87E-27 | 1.18E-26 |
| 2810408I1 | 2.809882 | 6.24E-27 | 1.25E-26 |
| Gm26549   | 1.843207 | 6.13E-27 | 1.23E-26 |
| Gm38260   | 1.581707 | 6.10E-27 | 1.22E-26 |
| 3110009E  | 1.358212 | 6.45E-27 | 1.29E-26 |
| Gm37204   | 0.917644 | 6.52E-27 | 1.30E-26 |
| Gm26879   | 1.630803 | 6.70E-27 | 1.34E-26 |
| Ankef1    | 2.761254 | 7.38E-27 | 1.48E-26 |
| H2ac8     | 1.500404 | 7.39E-27 | 1.48E-26 |
| Zc3h7a    | 0.46146  | 7.47E-27 | 1.49E-26 |

|          |          |          |          |
|----------|----------|----------|----------|
| A830052D | 2.618357 | 7.80E-27 | 1.56E-26 |
| Rpa3     | 0.677763 | 7.55E-27 | 1.51E-26 |
| Zfp677   | 1.854301 | 7.82E-27 | 1.56E-26 |
| Gm43866  | 4.547459 | 8.91E-27 | 1.78E-26 |
| Rabep1   | 0.461868 | 8.00E-27 | 1.60E-26 |
| Pcnp     | 0.333423 | 8.42E-27 | 1.68E-26 |
| Dipk2a   | 0.848648 | 8.47E-27 | 1.69E-26 |
| Gm15446  | 1.119982 | 8.64E-27 | 1.73E-26 |
| Ubp2l    | 0.361406 | 8.72E-27 | 1.74E-26 |
| Clec11a  | 1.828419 | 8.81E-27 | 1.76E-26 |
| Gm13269  | 3.057365 | 9.27E-27 | 1.85E-26 |
| Gm38146  | 2.076914 | 8.96E-27 | 1.79E-26 |
| A430027C | 1.203439 | 9.60E-27 | 1.92E-26 |
| Ctc1     | 0.765073 | 9.65E-27 | 1.93E-26 |
| Gemin2   | 0.91351  | 9.84E-27 | 1.96E-26 |
| Zscan20  | 1.510503 | 1.00E-26 | 2.00E-26 |
| 3000002C | 2.13119  | 1.07E-26 | 2.12E-26 |
| Mrpl51   | 0.448068 | 1.08E-26 | 2.15E-26 |
| Mnat1    | 0.595509 | 1.09E-26 | 2.17E-26 |
| Hddc3    | 0.949289 | 1.11E-26 | 2.21E-26 |
| AW04620C | 1.588846 | 1.14E-26 | 2.26E-26 |
| Mmachc   | 1.405162 | 1.14E-26 | 2.26E-26 |
| Spop     | 0.31476  | 1.25E-26 | 2.50E-26 |
| Afg3l1   | 0.665786 | 1.25E-26 | 2.48E-26 |
| Zfp974   | 1.271808 | 1.27E-26 | 2.52E-26 |
| Zim1     | 2.396675 | 1.29E-26 | 2.57E-26 |
| Stip1    | 0.506926 | 1.31E-26 | 2.61E-26 |
| A230107N | 2.348461 | 1.33E-26 | 2.64E-26 |
| Zfp335os | 2.035333 | 1.36E-26 | 2.70E-26 |
| Gm45251  | 1.494953 | 1.35E-26 | 2.69E-26 |
| Rspry1   | 0.532844 | 1.42E-26 | 2.83E-26 |
| Zfp267   | 0.740924 | 1.44E-26 | 2.87E-26 |
| Gm15687  | 2.763622 | 1.55E-26 | 3.09E-26 |
| Gnl3     | 0.600804 | 1.53E-26 | 3.04E-26 |
| Angptl6  | 1.193741 | 1.55E-26 | 3.09E-26 |
| Polr2d   | 0.658815 | 1.63E-26 | 3.24E-26 |
| Gtf2e2   | 0.647989 | 1.64E-26 | 3.25E-26 |
| B130055N | 2.065731 | 1.76E-26 | 3.50E-26 |
| Bfar     | 0.492032 | 1.74E-26 | 3.45E-26 |
| Aarsd1   | 1.352198 | 1.76E-26 | 3.49E-26 |
| Gm30191  | 2.215336 | 1.79E-26 | 3.56E-26 |
| Gm26912  | 2.544123 | 1.89E-26 | 3.75E-26 |
| Lrig2    | 0.691943 | 1.89E-26 | 3.75E-26 |
| Gm37018  | 1.995772 | 1.95E-26 | 3.87E-26 |
| Neurl1a  | 1.111113 | 2.07E-26 | 4.11E-26 |
| Gpr89    | 0.743694 | 2.28E-26 | 4.53E-26 |
| Card19   | 0.436377 | 2.42E-26 | 4.80E-26 |

|          |          |          |          |
|----------|----------|----------|----------|
| Gm15882  | 4.69209  | 2.75E-26 | 5.45E-26 |
| Gm44256  | 2.357409 | 2.56E-26 | 5.06E-26 |
| Fgfr1op2 | 0.432626 | 2.54E-26 | 5.04E-26 |
| Amd1     | 0.461978 | 2.63E-26 | 5.21E-26 |
| A930006L | 3.238233 | 2.83E-26 | 5.60E-26 |
| Exosc3   | 0.679556 | 2.72E-26 | 5.38E-26 |
| Atrx     | 0.276541 | 2.85E-26 | 5.63E-26 |
| Gm13199  | 2.533661 | 3.20E-26 | 6.34E-26 |
| Polr3e   | 0.911482 | 3.17E-26 | 6.28E-26 |
| Nup205   | 0.956609 | 3.45E-26 | 6.82E-26 |
| Tmem86b  | 1.773011 | 3.60E-26 | 7.11E-26 |
| Mterf3   | 0.656153 | 3.72E-26 | 7.36E-26 |
| Trmt5    | 1.306262 | 3.76E-26 | 7.43E-26 |
| Slc26a6  | 1.870251 | 3.93E-26 | 7.76E-26 |
| Gm44114  | 2.898953 | 4.04E-26 | 7.99E-26 |
| Gm44996  | 1.838642 | 3.98E-26 | 7.86E-26 |
| Gm7435   | 1.891267 | 4.13E-26 | 8.15E-26 |
| lkbkg    | 0.835534 | 4.12E-26 | 8.13E-26 |
| Cd276    | 1.798854 | 4.68E-26 | 9.24E-26 |
| Stk16    | 0.580839 | 5.31E-26 | 1.05E-25 |
| Bcl2l11  | 0.679746 | 5.35E-26 | 1.05E-25 |
| Col20a1  | 2.162315 | 5.59E-26 | 1.10E-25 |
| Cacybp   | 0.377723 | 5.58E-26 | 1.10E-25 |
| Slc25a10 | 1.082721 | 5.81E-26 | 1.15E-25 |
| Spsb3    | 0.748438 | 5.82E-26 | 1.15E-25 |
| Gm45358  | 1.953583 | 6.03E-26 | 1.19E-25 |
| A930030B | 3.900185 | 6.68E-26 | 1.32E-25 |
| Mettl5   | 0.701503 | 6.19E-26 | 1.22E-25 |
| Pdzd4    | 1.297695 | 6.48E-26 | 1.28E-25 |
| Galk2    | 0.992034 | 6.58E-26 | 1.30E-25 |
| Sugp1    | 0.694639 | 6.88E-26 | 1.36E-25 |
| Rpusd2   | 2.217393 | 7.60E-26 | 1.50E-25 |
| Pim2     | 1.425742 | 7.61E-26 | 1.50E-25 |
| Yme1l1   | 0.425108 | 7.87E-26 | 1.55E-25 |
| Ythdc2   | 0.751299 | 8.01E-26 | 1.57E-25 |
| Rnf122   | 1.0695   | 8.17E-26 | 1.61E-25 |
| Zfp748   | 0.96278  | 8.36E-26 | 1.64E-25 |
| Zxdc     | 0.75228  | 8.65E-26 | 1.70E-25 |
| Ddx18    | 0.483017 | 9.08E-26 | 1.78E-25 |
| Naa35    | 0.483444 | 9.33E-26 | 1.83E-25 |
| Trmt112  | 0.423035 | 9.47E-26 | 1.86E-25 |
| lws1     | 0.489964 | 1.02E-25 | 2.01E-25 |
| Gm14698  | 1.960733 | 1.07E-25 | 2.10E-25 |
| Polr2j   | 0.395359 | 1.10E-25 | 2.15E-25 |
| Cep78    | 1.106919 | 1.09E-25 | 2.15E-25 |
| Snip1    | 0.787103 | 1.11E-25 | 2.18E-25 |
| Gm45360  | 2.692082 | 1.26E-25 | 2.48E-25 |

|           |          |          |          |
|-----------|----------|----------|----------|
| Casc1     | 2.370419 | 1.25E-25 | 2.46E-25 |
| Cenpe     | 1.927989 | 1.29E-25 | 2.53E-25 |
| Rtn4ip1   | 1.553165 | 1.28E-25 | 2.51E-25 |
| Zfas1     | 0.48269  | 1.31E-25 | 2.56E-25 |
| Prpf40b   | 0.65163  | 1.32E-25 | 2.58E-25 |
| Cox20     | 0.45004  | 1.35E-25 | 2.65E-25 |
| Gm37490   | 1.700621 | 1.35E-25 | 2.64E-25 |
| Ppp4r3b   | 0.381572 | 1.36E-25 | 2.66E-25 |
| Mxd1      | 0.822307 | 1.37E-25 | 2.69E-25 |
| Gm6598    | 1.757814 | 1.50E-25 | 2.94E-25 |
| Rcc1      | 1.447723 | 1.49E-25 | 2.92E-25 |
| Slc25a38  | 1.032424 | 1.52E-25 | 2.98E-25 |
| Cnot2     | 0.539435 | 1.57E-25 | 3.07E-25 |
| Tm9sf4    | 0.509824 | 1.60E-25 | 3.12E-25 |
| Uvssa     | 0.530441 | 1.66E-25 | 3.25E-25 |
| Fabp7     | 2.322869 | 1.74E-25 | 3.40E-25 |
| Ing2      | 0.517679 | 1.79E-25 | 3.51E-25 |
| Haus1     | 0.965619 | 1.93E-25 | 3.78E-25 |
| Cul1      | 0.391549 | 1.95E-25 | 3.82E-25 |
| Gins2     | 1.402962 | 1.97E-25 | 3.86E-25 |
| Gm42853   | 1.544684 | 2.13E-25 | 4.16E-25 |
| Swsap1    | 1.169252 | 2.14E-25 | 4.18E-25 |
| Nptx1     | 1.697483 | 2.16E-25 | 4.22E-25 |
| Vkorc1l1  | 0.614593 | 2.26E-25 | 4.42E-25 |
| Gm38073   | 4.640797 | 2.54E-25 | 4.95E-25 |
| Dna2      | 1.749405 | 2.31E-25 | 4.51E-25 |
| Gm47615   | 1.151822 | 2.31E-25 | 4.50E-25 |
| Gm13349   | 1.509285 | 2.34E-25 | 4.56E-25 |
| Pgs1      | 0.743279 | 2.48E-25 | 4.85E-25 |
| Fam98a    | 0.738534 | 2.52E-25 | 4.91E-25 |
| Ubxn2b    | 0.778978 | 2.55E-25 | 4.98E-25 |
| Csnk2a2   | 0.490784 | 2.62E-25 | 5.10E-25 |
| Prkd1     | 0.761184 | 2.64E-25 | 5.16E-25 |
| Abhd13    | 0.72017  | 2.70E-25 | 5.26E-25 |
| Cdo1      | 1.798696 | 2.94E-25 | 5.74E-25 |
| Pam16     | 0.448299 | 3.01E-25 | 5.87E-25 |
| Pls1      | 1.36327  | 3.06E-25 | 5.96E-25 |
| Imp1l     | 0.489539 | 3.15E-25 | 6.13E-25 |
| Mbp       | 1.290759 | 3.19E-25 | 6.21E-25 |
| Galt      | 0.787621 | 3.70E-25 | 7.20E-25 |
| Gm49096   | 2.940569 | 3.88E-25 | 7.55E-25 |
| Rps19-ps3 | 1.504571 | 3.80E-25 | 7.39E-25 |
| Kat6a     | 0.376019 | 3.85E-25 | 7.50E-25 |
| Clpx      | 0.500615 | 4.24E-25 | 8.24E-25 |
| C130080G  | 3.986331 | 4.74E-25 | 9.21E-25 |
| Catsper2  | 1.948406 | 4.41E-25 | 8.57E-25 |
| Gtf2ird2  | 1.280492 | 4.63E-25 | 8.99E-25 |

|           |          |          |          |
|-----------|----------|----------|----------|
| Gm49864   | 1.843633 | 4.83E-25 | 9.39E-25 |
| Cbx4      | 0.739278 | 5.13E-25 | 9.97E-25 |
| Zc3h12b   | 1.286869 | 5.17E-25 | 1.00E-24 |
| Dusp22    | 0.492768 | 5.68E-25 | 1.10E-24 |
| Ak4       | 1.030379 | 5.72E-25 | 1.11E-24 |
| Mapk11    | 1.165102 | 5.81E-25 | 1.13E-24 |
| Ppip5k2   | 0.820239 | 6.03E-25 | 1.17E-24 |
| Trim23    | 0.86228  | 6.28E-25 | 1.22E-24 |
| A930007A  | 1.84654  | 6.57E-25 | 1.27E-24 |
| Smg6      | 0.478498 | 6.65E-25 | 1.29E-24 |
| Olfr46    | 3.299716 | 7.42E-25 | 1.44E-24 |
| Celf4     | 0.594803 | 7.53E-25 | 1.46E-24 |
| Zkscan5   | 1.098671 | 7.61E-25 | 1.47E-24 |
| Cyb5r4    | 0.663389 | 7.64E-25 | 1.48E-24 |
| Parp6     | 0.701396 | 7.69E-25 | 1.49E-24 |
| Taf8      | 0.839597 | 7.76E-25 | 1.50E-24 |
| Nufip1    | 0.816052 | 7.90E-25 | 1.53E-24 |
| Zfp410    | 0.701788 | 7.99E-25 | 1.55E-24 |
| Rps19bp1  | 0.584438 | 8.15E-25 | 1.58E-24 |
| Gm7072    | 0.760625 | 8.14E-25 | 1.57E-24 |
| Thumpd1   | 0.653774 | 8.18E-25 | 1.58E-24 |
| Trp53rkb  | 0.896245 | 8.29E-25 | 1.60E-24 |
| Gm10244   | 1.911837 | 8.78E-25 | 1.70E-24 |
| Gm3793    | 2.350487 | 8.90E-25 | 1.72E-24 |
| Ankrd13b  | 1.348301 | 8.95E-25 | 1.73E-24 |
| Zfp862-ps | 0.620097 | 8.97E-25 | 1.73E-24 |
| Smpd2     | 0.653765 | 9.14E-25 | 1.77E-24 |
| Gm11754   | 3.09099  | 9.57E-25 | 1.85E-24 |
| Gm37824   | 2.784057 | 9.93E-25 | 1.92E-24 |
| P4ha1     | 0.490163 | 9.90E-25 | 1.91E-24 |
| Gm15834   | 2.491793 | 1.06E-24 | 2.04E-24 |
| Gm38253   | 1.90698  | 1.03E-24 | 1.98E-24 |
| Slc6a15   | 1.404949 | 1.01E-24 | 1.96E-24 |
| Gm4707    | 1.309701 | 1.06E-24 | 2.04E-24 |
| Sdhaf3    | 0.894105 | 1.08E-24 | 2.08E-24 |
| Thumpd3   | 0.786478 | 1.16E-24 | 2.23E-24 |
| Spag1     | 1.259405 | 1.18E-24 | 2.27E-24 |
| Gm9706    | 1.773435 | 1.22E-24 | 2.35E-24 |
| Fbxo43    | 3.185994 | 1.31E-24 | 2.52E-24 |
| Cct4      | 0.347803 | 1.26E-24 | 2.43E-24 |
| Klhl11    | 0.929845 | 1.38E-24 | 2.65E-24 |
| Asb8      | 0.71724  | 1.38E-24 | 2.67E-24 |
| Rps11-ps1 | 0.816129 | 1.43E-24 | 2.75E-24 |
| Serbp1    | 0.247406 | 1.56E-24 | 3.01E-24 |
| Scrn2     | 0.853045 | 1.58E-24 | 3.03E-24 |
| Zfp383    | 1.022535 | 1.59E-24 | 3.07E-24 |
| Rnf41     | 0.721093 | 1.67E-24 | 3.21E-24 |

|           |          |          |          |
|-----------|----------|----------|----------|
| Pask      | 2.178653 | 1.76E-24 | 3.38E-24 |
| Zfp346    | 0.902109 | 1.83E-24 | 3.52E-24 |
| Ctu2      | 0.863037 | 1.84E-24 | 3.55E-24 |
| Smim8     | 0.638205 | 1.87E-24 | 3.59E-24 |
| Gm48225   | 1.097162 | 1.89E-24 | 3.63E-24 |
| Zfp174    | 1.712135 | 2.06E-24 | 3.96E-24 |
| Tsn       | 0.319387 | 2.17E-24 | 4.18E-24 |
| Mtmr14    | 0.884941 | 2.27E-24 | 4.36E-24 |
| E030022I1 | 0.983404 | 2.31E-24 | 4.44E-24 |
| Sirt6     | 0.958747 | 2.44E-24 | 4.69E-24 |
| C030006K  | 0.859955 | 2.52E-24 | 4.84E-24 |
| Zfp709    | 1.312501 | 2.56E-24 | 4.90E-24 |
| Cog1      | 0.793219 | 2.58E-24 | 4.95E-24 |
| Sars      | 0.422705 | 2.64E-24 | 5.06E-24 |
| Ints10    | 0.73305  | 2.74E-24 | 5.26E-24 |
| Zfp959    | 1.03333  | 2.81E-24 | 5.40E-24 |
| Stk11     | 0.448995 | 2.87E-24 | 5.50E-24 |
| Cops8     | 0.470692 | 3.15E-24 | 6.03E-24 |
| Dynlt1c   | 1.572346 | 3.26E-24 | 6.24E-24 |
| Ipp       | 1.150537 | 3.23E-24 | 6.18E-24 |
| Vps45     | 0.739475 | 3.25E-24 | 6.23E-24 |
| Ccdc169   | 2.476753 | 3.48E-24 | 6.66E-24 |
| Dnajb6    | 0.333902 | 3.48E-24 | 6.65E-24 |
| Slc66a1   | 1.203384 | 3.59E-24 | 6.87E-24 |
| Sap130    | 0.65415  | 3.70E-24 | 7.08E-24 |
| Uchl3     | 0.715786 | 3.75E-24 | 7.17E-24 |
| Srp19     | 0.407204 | 3.90E-24 | 7.44E-24 |
| Gca       | 0.893672 | 3.89E-24 | 7.43E-24 |
| Ppfia3    | 1.330414 | 3.97E-24 | 7.59E-24 |
| Nfxl1     | 0.847328 | 4.03E-24 | 7.70E-24 |
| Gm13620   | 1.866391 | 4.29E-24 | 8.19E-24 |
| Tmpo      | 0.34138  | 4.29E-24 | 8.19E-24 |
| Riok1     | 0.551529 | 4.37E-24 | 8.34E-24 |
| Gm11713   | 0.964075 | 4.47E-24 | 8.54E-24 |
| Gm47659   | 3.337872 | 4.80E-24 | 9.15E-24 |
| Hpcal1    | 0.457567 | 4.52E-24 | 8.63E-24 |
| 1700030KI | 1.273982 | 4.76E-24 | 9.08E-24 |
| Zfp280b   | 1.099578 | 4.94E-24 | 9.43E-24 |
| Mgarp     | 0.297358 | 5.32E-24 | 1.01E-23 |
| Ccdc137   | 0.867197 | 5.06E-24 | 9.65E-24 |
| Vps33b    | 0.987417 | 5.14E-24 | 9.80E-24 |
| Pcdhga12  | 0.865544 | 5.19E-24 | 9.90E-24 |
| Sf3b3     | 0.424097 | 5.22E-24 | 9.94E-24 |
| Gm17315   | 2.334087 | 5.98E-24 | 1.14E-23 |
| 2310043P  | 2.743541 | 6.26E-24 | 1.19E-23 |
| Sf3b4     | 0.567925 | 6.00E-24 | 1.14E-23 |
| Usb1      | 1.101117 | 6.23E-24 | 1.19E-23 |

|          |          |          |          |
|----------|----------|----------|----------|
| Timm10   | 0.722184 | 6.31E-24 | 1.20E-23 |
| Mif4gd   | 0.466266 | 6.61E-24 | 1.26E-23 |
| Uba3     | 0.541081 | 6.62E-24 | 1.26E-23 |
| Rrp9     | 0.842722 | 6.72E-24 | 1.28E-23 |
| Gorab    | 0.854688 | 6.87E-24 | 1.31E-23 |
| Dynlrb2  | 3.037347 | 7.60E-24 | 1.44E-23 |
| Pign     | 0.843118 | 7.20E-24 | 1.37E-23 |
| Pnpt1    | 0.882468 | 7.26E-24 | 1.38E-23 |
| Gm4204   | 1.184596 | 7.33E-24 | 1.39E-23 |
| Akap5    | 2.502159 | 7.79E-24 | 1.48E-23 |
| Noa1     | 1.026997 | 7.72E-24 | 1.47E-23 |
| Tmem101  | 0.722457 | 7.85E-24 | 1.49E-23 |
| Amy1     | 0.941634 | 7.88E-24 | 1.50E-23 |
| Gm20342  | 0.752981 | 7.92E-24 | 1.50E-23 |
| Efcab12  | 2.354424 | 8.06E-24 | 1.53E-23 |
| Slc39a3  | 0.709844 | 8.33E-24 | 1.58E-23 |
| AA413626 | 2.963414 | 8.67E-24 | 1.65E-23 |
| Ints12   | 0.835157 | 8.79E-24 | 1.67E-23 |
| Rfc4     | 0.942469 | 8.92E-24 | 1.69E-23 |
| Ppil1    | 0.791722 | 9.55E-24 | 1.81E-23 |
| Nckipsd  | 1.002869 | 9.57E-24 | 1.82E-23 |
| Gm37303  | 1.503899 | 9.64E-24 | 1.83E-23 |
| Ogfod2   | 0.964021 | 9.70E-24 | 1.84E-23 |
| Gm5176   | 1.957423 | 1.06E-23 | 2.01E-23 |
| Gnpat    | 0.631243 | 1.07E-23 | 2.02E-23 |
| Gm53019  | 4.143436 | 1.13E-23 | 2.14E-23 |
| Eif5b    | 0.313944 | 1.10E-23 | 2.07E-23 |
| Ndufs3   | 0.432264 | 1.11E-23 | 2.09E-23 |
| Trappc11 | 0.61032  | 1.11E-23 | 2.09E-23 |
| Phactr1  | 0.43028  | 1.18E-23 | 2.23E-23 |
| Sec23a   | 0.618071 | 1.18E-23 | 2.23E-23 |
| Zswim9   | 0.937373 | 1.19E-23 | 2.24E-23 |
| Toe1     | 0.748874 | 1.24E-23 | 2.34E-23 |
| Zfp935   | 1.114583 | 1.29E-23 | 2.43E-23 |
| Rfng     | 0.813294 | 1.37E-23 | 2.59E-23 |
| Alkbh3   | 0.767185 | 1.38E-23 | 2.60E-23 |
| Gm37366  | 1.819725 | 1.52E-23 | 2.87E-23 |
| Rpa2     | 0.812279 | 1.52E-23 | 2.86E-23 |
| Zfp354c  | 0.865082 | 1.58E-23 | 2.97E-23 |
| BC026513 | 2.117592 | 1.62E-23 | 3.05E-23 |
| Prr11    | 1.743299 | 1.61E-23 | 3.04E-23 |
| Dcaf15   | 1.101217 | 1.65E-23 | 3.11E-23 |
| Tgs1     | 0.46812  | 1.71E-23 | 3.22E-23 |
| Evi5l    | 0.894846 | 1.71E-23 | 3.22E-23 |
| Gm2531   | 1.287338 | 1.77E-23 | 3.33E-23 |
| Abitram  | 1.010682 | 1.88E-23 | 3.54E-23 |
| Gm43162  | 1.261741 | 1.91E-23 | 3.60E-23 |

|          |          |          |          |
|----------|----------|----------|----------|
| Gm42685  | 1.992698 | 1.95E-23 | 3.68E-23 |
| Hdac6    | 0.944097 | 1.93E-23 | 3.63E-23 |
| Gm10101  | 2.325254 | 2.01E-23 | 3.79E-23 |
| Cenpq    | 1.13691  | 1.98E-23 | 3.74E-23 |
| Zbtb48   | 1.022717 | 2.00E-23 | 3.77E-23 |
| Dclre1a  | 0.972442 | 2.04E-23 | 3.83E-23 |
| Ganab    | 0.47879  | 2.19E-23 | 4.13E-23 |
| Wasl     | 0.405772 | 2.20E-23 | 4.15E-23 |
| BC046251 | 2.241042 | 2.28E-23 | 4.29E-23 |
| Ccdc47   | 0.339185 | 2.29E-23 | 4.31E-23 |
| Gm37106  | 1.345249 | 2.37E-23 | 4.45E-23 |
| Med23    | 0.747449 | 2.40E-23 | 4.51E-23 |
| Cog6     | 0.707247 | 2.41E-23 | 4.53E-23 |
| Sirt2    | 0.41342  | 2.45E-23 | 4.61E-23 |
| Gm35842  | 3.283498 | 2.61E-23 | 4.89E-23 |
| Gm42840  | 1.841797 | 2.64E-23 | 4.96E-23 |
| Vps29    | 0.3663   | 2.72E-23 | 5.11E-23 |
| Gm50221  | 5.738888 | 3.05E-23 | 5.73E-23 |
| Scn4a    | 2.56149  | 2.92E-23 | 5.48E-23 |
| Fam151b  | 1.559956 | 2.88E-23 | 5.40E-23 |
| Sf3b5    | 0.378221 | 3.02E-23 | 5.67E-23 |
| Timm29   | 0.683987 | 3.03E-23 | 5.69E-23 |
| Gm42571  | 1.166815 | 3.13E-23 | 5.87E-23 |
| Tedc2    | 1.190076 | 3.36E-23 | 6.29E-23 |
| Cyp4f13  | 0.913903 | 3.36E-23 | 6.30E-23 |
| Ndufb5   | 0.312078 | 3.43E-23 | 6.43E-23 |
| Zfp13    | 1.190101 | 3.50E-23 | 6.56E-23 |
| Gm40309  | 0.832404 | 3.51E-23 | 6.58E-23 |
| Tuba1b   | 0.271799 | 3.60E-23 | 6.74E-23 |
| Vps9d1   | 0.73134  | 3.70E-23 | 6.93E-23 |
| Sart3    | 0.682112 | 3.88E-23 | 7.27E-23 |
| Tfg      | 0.488674 | 4.06E-23 | 7.59E-23 |
| Suds3    | 0.452186 | 4.20E-23 | 7.85E-23 |
| Fahd1    | 0.702625 | 4.19E-23 | 7.84E-23 |
| Gigyf1   | 0.455123 | 4.21E-23 | 7.87E-23 |
| 3830408C | 1.423056 | 4.33E-23 | 8.09E-23 |
| Opa1     | 0.548695 | 4.42E-23 | 8.26E-23 |
| Abcc10   | 1.412204 | 5.16E-23 | 9.64E-23 |
| B3galnt2 | 0.771671 | 5.31E-23 | 9.92E-23 |
| Mrpl47   | 0.795273 | 5.44E-23 | 1.02E-22 |
| Fzr1     | 0.77036  | 5.73E-23 | 1.07E-22 |
| Gatc     | 0.747856 | 5.74E-23 | 1.07E-22 |
| Zscan12  | 0.842882 | 5.81E-23 | 1.08E-22 |
| Gm36266  | 2.001979 | 5.92E-23 | 1.10E-22 |
| Ankrd44  | 0.651521 | 5.86E-23 | 1.09E-22 |
| Flad1    | 1.144618 | 6.27E-23 | 1.17E-22 |
| Cops5    | 0.453583 | 6.30E-23 | 1.18E-22 |



|           |          |          |          |
|-----------|----------|----------|----------|
| Mrps17    | 0.46508  | 6.33E-23 | 1.18E-22 |
| Gzf1      | 0.650905 | 6.35E-23 | 1.18E-22 |
| Zfp672    | 0.778146 | 6.45E-23 | 1.20E-22 |
| Gm7616    | 3.86043  | 7.05E-23 | 1.31E-22 |
| Nsg2      | 1.235601 | 6.56E-23 | 1.22E-22 |
| Stk25     | 0.425565 | 6.63E-23 | 1.23E-22 |
| Kyat1     | 1.047139 | 6.63E-23 | 1.23E-22 |
| E130317F2 | 1.497297 | 6.80E-23 | 1.27E-22 |
| Gm45483   | 1.80374  | 7.01E-23 | 1.31E-22 |
| 3110031N  | 4.102855 | 7.67E-23 | 1.43E-22 |
| Gm5141    | 1.322049 | 7.29E-23 | 1.36E-22 |
| Gm38376   | 1.391619 | 7.81E-23 | 1.45E-22 |
| Zfp944    | 0.988682 | 7.90E-23 | 1.47E-22 |
| Srpx      | 2.573052 | 8.22E-23 | 1.53E-22 |
| A930016O  | 1.928067 | 8.09E-23 | 1.51E-22 |
| Htra2     | 0.741356 | 8.19E-23 | 1.52E-22 |
| Tspan31   | 0.473559 | 9.15E-23 | 1.70E-22 |
| Cnpy3     | 0.615741 | 9.17E-23 | 1.70E-22 |
| Vps8      | 0.80164  | 9.22E-23 | 1.71E-22 |
| Pm20d2    | 3.165924 | 1.01E-22 | 1.88E-22 |
| Gm48766   | 1.738021 | 1.02E-22 | 1.89E-22 |
| Rtel1     | 1.16362  | 1.04E-22 | 1.93E-22 |
| Rpp30     | 0.605564 | 1.09E-22 | 2.02E-22 |
| Cilk1     | 0.480814 | 1.10E-22 | 2.04E-22 |
| Rxrg      | 2.467518 | 1.14E-22 | 2.11E-22 |
| Gm42572   | 0.959625 | 1.15E-22 | 2.14E-22 |
| Rsad1     | 1.170404 | 1.28E-22 | 2.38E-22 |
| Gm42690   | 2.003091 | 1.32E-22 | 2.44E-22 |
| Zfp655    | 0.634136 | 1.32E-22 | 2.45E-22 |
| Rpap1     | 0.878889 | 1.35E-22 | 2.51E-22 |
| Slc27a4   | 0.913266 | 1.38E-22 | 2.56E-22 |
| Wtap      | 0.437178 | 1.44E-22 | 2.66E-22 |
| Nol10     | 0.919633 | 1.43E-22 | 2.65E-22 |
| Gm45176   | 1.507697 | 1.50E-22 | 2.78E-22 |
| Gm44624   | 2.088427 | 1.63E-22 | 3.01E-22 |
| Zswim8    | 0.484941 | 1.65E-22 | 3.06E-22 |
| Ralgapa2  | 0.683086 | 1.68E-22 | 3.10E-22 |
| Zfp251    | 0.806548 | 1.68E-22 | 3.12E-22 |
| Cir1      | 0.498729 | 1.71E-22 | 3.16E-22 |
| Tubgcp6   | 1.001177 | 1.71E-22 | 3.16E-22 |
| Ache      | 1.278425 | 1.94E-22 | 3.59E-22 |
| Dhrs7b    | 0.726131 | 2.04E-22 | 3.76E-22 |
| Gm45501   | 0.96704  | 2.12E-22 | 3.92E-22 |
| AA986860  | 1.72485  | 2.15E-22 | 3.97E-22 |
| Ep300     | 0.367743 | 2.16E-22 | 3.99E-22 |
| Zfp623    | 0.934093 | 2.15E-22 | 3.98E-22 |
| Lrp8os3   | 2.671052 | 2.24E-22 | 4.13E-22 |

|           |          |          |          |
|-----------|----------|----------|----------|
| Airn      | 0.88086  | 2.27E-22 | 4.20E-22 |
| Gm49747   | 1.82117  | 2.34E-22 | 4.31E-22 |
| Ift43     | 0.472101 | 2.44E-22 | 4.51E-22 |
| Fbxl18    | 0.951789 | 2.47E-22 | 4.56E-22 |
| Zfp689    | 1.317693 | 2.48E-22 | 4.58E-22 |
| Snrnp200  | 0.407014 | 2.54E-22 | 4.68E-22 |
| Lss       | 0.937676 | 2.61E-22 | 4.81E-22 |
| Bpnt1     | 0.661401 | 2.74E-22 | 5.05E-22 |
| Ppp1r37   | 0.538057 | 2.75E-22 | 5.08E-22 |
| Zcchc9-ps | 3.342783 | 2.94E-22 | 5.43E-22 |
| 2810403D  | 0.997645 | 2.80E-22 | 5.17E-22 |
| Sh3bp5l   | 0.745768 | 2.86E-22 | 5.27E-22 |
| Gm17690   | 1.747788 | 2.89E-22 | 5.32E-22 |
| Wdr12     | 0.740606 | 2.89E-22 | 5.33E-22 |
| Spout1    | 0.854118 | 2.95E-22 | 5.43E-22 |
| Nup107    | 0.971519 | 3.00E-22 | 5.52E-22 |
| Fbxo28    | 0.58158  | 3.09E-22 | 5.69E-22 |
| Gm49886   | 3.664591 | 3.33E-22 | 6.13E-22 |
| Hspa9     | 0.376126 | 3.15E-22 | 5.80E-22 |
| Pggt1b    | 0.392794 | 3.17E-22 | 5.83E-22 |
| Gm46218   | 1.596636 | 3.24E-22 | 5.96E-22 |
| Usp31     | 0.724203 | 3.30E-22 | 6.08E-22 |
| Gm45472   | 4.719826 | 3.62E-22 | 6.66E-22 |
| Pias2     | 0.593788 | 3.38E-22 | 6.22E-22 |
| Rnf214    | 0.571332 | 3.41E-22 | 6.28E-22 |
| Kdm1b     | 1.089546 | 3.42E-22 | 6.28E-22 |
| Gm50462   | 1.222951 | 3.49E-22 | 6.42E-22 |
| Josd1     | 0.684083 | 3.50E-22 | 6.43E-22 |
| Elac1     | 0.736329 | 3.71E-22 | 6.83E-22 |
| Ybey      | 1.072609 | 3.80E-22 | 6.98E-22 |
| Yipf2     | 0.893287 | 3.85E-22 | 7.07E-22 |
| Gm7278    | 3.281538 | 4.32E-22 | 7.93E-22 |
| Zfp457    | 2.983483 | 4.57E-22 | 8.38E-22 |
| Poli      | 1.256113 | 4.38E-22 | 8.04E-22 |
| Gm49194   | 2.443333 | 4.46E-22 | 8.18E-22 |
| Clcn6     | 0.766731 | 4.57E-22 | 8.38E-22 |
| Ccar2     | 0.720357 | 4.73E-22 | 8.67E-22 |
| Gm45640   | 1.692607 | 4.76E-22 | 8.73E-22 |
| Rbm12b1   | 0.969669 | 4.76E-22 | 8.72E-22 |
| Yif1b     | 0.451357 | 4.88E-22 | 8.95E-22 |
| Zfp647    | 1.158928 | 4.96E-22 | 9.10E-22 |
| Nip7      | 0.574328 | 5.14E-22 | 9.42E-22 |
| A430103D  | 1.542471 | 5.31E-22 | 9.74E-22 |
| Rnaseh2b  | 0.960581 | 5.47E-22 | 1.00E-21 |
| Ube2a     | 0.506606 | 5.61E-22 | 1.03E-21 |
| Dhx15     | 0.376711 | 6.05E-22 | 1.11E-21 |
| Khdrbs1   | 0.362584 | 6.11E-22 | 1.12E-21 |

|           |          |          |          |
|-----------|----------|----------|----------|
| Dmwd      | 0.4781   | 6.51E-22 | 1.19E-21 |
| Gm37860   | 2.004442 | 6.55E-22 | 1.20E-21 |
| Rptor     | 0.682735 | 6.59E-22 | 1.21E-21 |
| Sp3os     | 0.624555 | 6.65E-22 | 1.22E-21 |
| Zfp68     | 0.50021  | 6.93E-22 | 1.27E-21 |
| Trim41    | 0.573788 | 6.98E-22 | 1.28E-21 |
| Ascl4     | 3.12001  | 7.33E-22 | 1.34E-21 |
| Trmt13    | 0.619708 | 7.18E-22 | 1.31E-21 |
| Uba6      | 0.633122 | 7.24E-22 | 1.32E-21 |
| Gm43182   | 2.80461  | 7.60E-22 | 1.39E-21 |
| Taf1      | 0.407797 | 7.46E-22 | 1.36E-21 |
| Chpf      | 0.884324 | 7.89E-22 | 1.44E-21 |
| Heatr3    | 0.788122 | 7.97E-22 | 1.46E-21 |
| Slc19a2   | 1.351948 | 8.29E-22 | 1.51E-21 |
| Gm37632   | 2.168768 | 8.70E-22 | 1.59E-21 |
| Rdh13     | 1.054154 | 8.67E-22 | 1.58E-21 |
| Gm43896   | 2.250281 | 9.28E-22 | 1.69E-21 |
| Lias      | 0.591988 | 9.34E-22 | 1.70E-21 |
| Ints4     | 0.762911 | 9.39E-22 | 1.71E-21 |
| Aco2      | 0.361355 | 9.55E-22 | 1.74E-21 |
| Get3      | 0.571258 | 9.83E-22 | 1.79E-21 |
| Gm42967   | 2.129314 | 1.05E-21 | 1.91E-21 |
| Mpv17l    | 1.051239 | 1.03E-21 | 1.88E-21 |
| Bod1      | 0.417983 | 1.10E-21 | 2.00E-21 |
| Ankrd13c  | 0.530961 | 1.20E-21 | 2.18E-21 |
| Golt1b    | 0.6808   | 1.22E-21 | 2.22E-21 |
| Dbndd2    | 0.801528 | 1.26E-21 | 2.30E-21 |
| Gm15743   | 3.052671 | 1.34E-21 | 2.44E-21 |
| U2af1     | 0.364834 | 1.30E-21 | 2.36E-21 |
| Zmym1     | 0.810424 | 1.35E-21 | 2.45E-21 |
| Ado       | 0.704844 | 1.39E-21 | 2.53E-21 |
| Grb10     | 0.448652 | 1.41E-21 | 2.56E-21 |
| Gm21926   | 0.729779 | 1.42E-21 | 2.59E-21 |
| Hars2     | 0.736859 | 1.43E-21 | 2.59E-21 |
| Prelid1   | 0.396335 | 1.44E-21 | 2.61E-21 |
| Usp3      | 0.542307 | 1.43E-21 | 2.60E-21 |
| Lsm2      | 0.488138 | 1.44E-21 | 2.62E-21 |
| Ccdc142os | 1.506254 | 1.46E-21 | 2.65E-21 |
| Etaa1     | 0.738106 | 1.48E-21 | 2.69E-21 |
| Clca1     | 2.959288 | 1.52E-21 | 2.75E-21 |
| Pomc      | 0.872934 | 1.49E-21 | 2.71E-21 |
| Nfs1      | 0.613905 | 1.50E-21 | 2.73E-21 |
| Gm36952   | 1.494635 | 1.57E-21 | 2.85E-21 |
| Fcrl5     | 3.912476 | 1.68E-21 | 3.05E-21 |
| Bud13     | 0.91995  | 1.76E-21 | 3.19E-21 |
| Elp4      | 0.703125 | 1.76E-21 | 3.20E-21 |
| Mtm1      | 0.72813  | 1.82E-21 | 3.30E-21 |

|           |          |          |          |
|-----------|----------|----------|----------|
| Aff4      | 0.316441 | 1.85E-21 | 3.35E-21 |
| Gm37181   | 3.195225 | 2.01E-21 | 3.65E-21 |
| Zfp317    | 0.772027 | 1.92E-21 | 3.48E-21 |
| Gm45406   | 2.313542 | 1.99E-21 | 3.60E-21 |
| Cnot11    | 0.618015 | 1.97E-21 | 3.56E-21 |
| Ibtk      | 0.648427 | 1.98E-21 | 3.58E-21 |
| Mrpl44    | 0.63788  | 1.98E-21 | 3.58E-21 |
| RbmX2     | 0.719403 | 1.99E-21 | 3.60E-21 |
| Rbm41     | 1.02882  | 2.12E-21 | 3.84E-21 |
| Pot1a     | 0.678614 | 2.21E-21 | 4.01E-21 |
| Gm42559   | 1.341497 | 2.28E-21 | 4.13E-21 |
| Ap1ar     | 0.551185 | 2.44E-21 | 4.41E-21 |
| Rnf220    | 0.488461 | 2.75E-21 | 4.98E-21 |
| Cdyl      | 0.625888 | 2.81E-21 | 5.09E-21 |
| Smarcad1  | 0.545899 | 2.83E-21 | 5.11E-21 |
| Det1      | 1.126496 | 2.85E-21 | 5.15E-21 |
| Fam222b   | 0.589153 | 2.96E-21 | 5.35E-21 |
| Kif20b    | 1.523876 | 3.08E-21 | 5.57E-21 |
| Nkapd1    | 0.539684 | 3.11E-21 | 5.62E-21 |
| Ctsb      | 0.304878 | 3.14E-21 | 5.68E-21 |
| 4732496C  | 1.685439 | 3.15E-21 | 5.69E-21 |
| Cbx1      | 0.305184 | 3.19E-21 | 5.77E-21 |
| Smim31    | 4.512669 | 3.77E-21 | 6.80E-21 |
| Wdr38     | 1.975699 | 3.55E-21 | 6.42E-21 |
| ENSMUSG   | 1.656208 | 3.72E-21 | 6.71E-21 |
| Pip4p1    | 0.527158 | 3.76E-21 | 6.79E-21 |
| Rfesd     | 0.811981 | 3.77E-21 | 6.81E-21 |
| 2510017J1 | 1.534553 | 3.95E-21 | 7.13E-21 |
| Ppih      | 0.819253 | 3.96E-21 | 7.15E-21 |
| Gmeb1     | 0.671258 | 4.05E-21 | 7.31E-21 |
| Usp8      | 0.439192 | 4.19E-21 | 7.55E-21 |
| Trappc10  | 0.471186 | 4.22E-21 | 7.61E-21 |
| Odad3     | 2.537496 | 4.32E-21 | 7.78E-21 |
| Ap4m1     | 0.73849  | 4.26E-21 | 7.68E-21 |
| Trappc13  | 0.492983 | 4.35E-21 | 7.84E-21 |
| Cacul1    | 0.578215 | 4.35E-21 | 7.84E-21 |
| Gm16701-  | 1.550639 | 4.39E-21 | 7.91E-21 |
| Zbtb40    | 1.00329  | 4.52E-21 | 8.15E-21 |
| Rabgap1   | 0.430446 | 4.59E-21 | 8.28E-21 |
| 4930534D  | 3.159162 | 4.81E-21 | 8.67E-21 |
| Klhdc4    | 0.809657 | 4.85E-21 | 8.74E-21 |
| Cnga3     | 2.644753 | 5.05E-21 | 9.09E-21 |
| Wbp2      | 0.33188  | 4.95E-21 | 8.91E-21 |
| Fam114a2  | 0.411692 | 5.16E-21 | 9.28E-21 |
| 4833428L1 | 3.204061 | 5.47E-21 | 9.84E-21 |
| Gm43462   | 0.993725 | 5.24E-21 | 9.43E-21 |
| Btln9     | 3.304079 | 5.53E-21 | 9.95E-21 |

|           |          |          |          |
|-----------|----------|----------|----------|
| Traf3     | 0.720937 | 5.42E-21 | 9.75E-21 |
| Gm1976    | 1.52599  | 5.53E-21 | 9.95E-21 |
| Thop1     | 1.089823 | 5.54E-21 | 9.97E-21 |
| Gm16169   | 3.891712 | 5.87E-21 | 1.06E-20 |
| Miip      | 0.825613 | 5.66E-21 | 1.02E-20 |
| Gm47158   | 3.746115 | 5.99E-21 | 1.08E-20 |
| Gm5112    | 1.291382 | 6.04E-21 | 1.08E-20 |
| Gprin1    | 1.538314 | 6.09E-21 | 1.09E-20 |
| Lamp3     | 2.558747 | 6.23E-21 | 1.12E-20 |
| Rrn3      | 0.637292 | 6.23E-21 | 1.12E-20 |
| Tmem209   | 0.788317 | 6.55E-21 | 1.18E-20 |
| Dnajc13   | 0.531995 | 6.59E-21 | 1.18E-20 |
| Gm43566   | 2.23905  | 6.81E-21 | 1.22E-20 |
| Mtif3     | 0.652818 | 6.79E-21 | 1.22E-20 |
| Reep2     | 0.991473 | 6.83E-21 | 1.23E-20 |
| Twink     | 1.033624 | 6.88E-21 | 1.23E-20 |
| Entpd5    | 0.845822 | 6.93E-21 | 1.24E-20 |
| Asf1a     | 0.523176 | 6.99E-21 | 1.25E-20 |
| Spata5    | 0.884365 | 6.99E-21 | 1.25E-20 |
| Ipo4      | 0.807185 | 7.14E-21 | 1.28E-20 |
| Dnaaf5    | 1.173655 | 7.18E-21 | 1.29E-20 |
| Gm44091   | 2.882296 | 7.57E-21 | 1.36E-20 |
| Ighmbp2   | 1.155185 | 7.63E-21 | 1.37E-20 |
| Med1      | 0.433363 | 8.07E-21 | 1.45E-20 |
| Gm53012   | 1.156448 | 8.14E-21 | 1.46E-20 |
| Mfsd2b    | 1.979612 | 8.15E-21 | 1.46E-20 |
| Taok1     | 0.280006 | 8.24E-21 | 1.48E-20 |
| Gm9750    | 4.553131 | 8.98E-21 | 1.61E-20 |
| Atp6v1h   | 0.490195 | 8.43E-21 | 1.51E-20 |
| Ppie      | 0.587274 | 8.56E-21 | 1.53E-20 |
| Gm37447   | 1.536794 | 8.74E-21 | 1.56E-20 |
| Eml6      | 0.799732 | 8.79E-21 | 1.57E-20 |
| Ston2     | 0.762733 | 9.47E-21 | 1.70E-20 |
| Dnm3os    | 1.4965   | 9.67E-21 | 1.73E-20 |
| 2500004C1 | 1.213212 | 9.82E-21 | 1.76E-20 |
| Gm41804   | 2.257426 | 1.02E-20 | 1.83E-20 |
| Slc25a47  | 1.673625 | 1.03E-20 | 1.84E-20 |
| Grk4      | 0.956519 | 1.03E-20 | 1.84E-20 |
| Tinf2     | 0.90992  | 1.05E-20 | 1.87E-20 |
| Fgf9      | 0.685361 | 1.05E-20 | 1.88E-20 |
| Tmem127   | 0.516995 | 1.08E-20 | 1.93E-20 |
| Gm42890   | 2.830793 | 1.17E-20 | 2.08E-20 |
| Rwdd3     | 1.114157 | 1.15E-20 | 2.05E-20 |
| Ndufaf3   | 0.469734 | 1.21E-20 | 2.16E-20 |
| Szt2      | 0.902474 | 1.21E-20 | 2.16E-20 |
| Gm49089   | 1.88245  | 1.23E-20 | 2.20E-20 |
| Hdx       | 1.532739 | 1.26E-20 | 2.24E-20 |

|          |          |          |          |
|----------|----------|----------|----------|
| Prdm4    | 0.783101 | 1.28E-20 | 2.28E-20 |
| Abcb10   | 0.712536 | 1.35E-20 | 2.41E-20 |
| Rps2-ps9 | 1.163287 | 1.43E-20 | 2.55E-20 |
| Pigbos1  | 0.661426 | 1.47E-20 | 2.61E-20 |
| Brat1    | 0.982882 | 1.46E-20 | 2.61E-20 |
| Dmac2l   | 0.897151 | 1.50E-20 | 2.68E-20 |
| Rhobtb2  | 0.745693 | 1.53E-20 | 2.72E-20 |
| Exog     | 1.151849 | 1.54E-20 | 2.74E-20 |
| Zbtb45   | 0.774575 | 1.55E-20 | 2.75E-20 |
| Zfp382   | 1.441813 | 1.67E-20 | 2.98E-20 |
| Gm45444  | 2.667436 | 1.74E-20 | 3.10E-20 |
| Haus6    | 0.909536 | 1.72E-20 | 3.07E-20 |
| Syndig1l | 1.821563 | 1.74E-20 | 3.09E-20 |
| Exosc8   | 0.544921 | 1.74E-20 | 3.10E-20 |
| BC005624 | 0.379882 | 1.76E-20 | 3.12E-20 |
| Jrk      | 1.446776 | 1.76E-20 | 3.14E-20 |
| Ypel1    | 1.688601 | 1.81E-20 | 3.21E-20 |
| Cct3     | 0.358959 | 1.80E-20 | 3.21E-20 |
| Tmem28   | 3.839102 | 1.91E-20 | 3.39E-20 |
| Tcta     | 0.627797 | 1.83E-20 | 3.25E-20 |
| Slc39a14 | 1.10412  | 1.84E-20 | 3.28E-20 |
| Snhg8    | 0.313138 | 1.88E-20 | 3.34E-20 |
| Smyd5    | 1.130978 | 1.87E-20 | 3.33E-20 |
| Gm41757  | 3.671276 | 1.96E-20 | 3.49E-20 |
| Atg2b    | 0.788003 | 1.94E-20 | 3.45E-20 |
| Atad3aos | 1.260683 | 2.00E-20 | 3.55E-20 |
| Pfkfb4   | 1.193039 | 2.11E-20 | 3.75E-20 |
| Cutc     | 0.748399 | 2.15E-20 | 3.82E-20 |
| Ccdc187  | 3.289293 | 2.25E-20 | 4.00E-20 |
| Sbf1     | 0.596109 | 2.24E-20 | 3.97E-20 |
| H4c9     | 0.70062  | 2.29E-20 | 4.07E-20 |
| Tspyl1   | 0.438269 | 2.35E-20 | 4.17E-20 |
| Kiz      | 0.74751  | 2.35E-20 | 4.17E-20 |
| Btbd8    | 0.79094  | 2.43E-20 | 4.31E-20 |
| 9130023H | 1.206395 | 2.45E-20 | 4.34E-20 |
| Ccdc87   | 2.909848 | 2.53E-20 | 4.49E-20 |
| Gm7180   | 1.272146 | 2.48E-20 | 4.40E-20 |
| Sdccag8  | 0.842186 | 2.58E-20 | 4.57E-20 |
| Fiz1     | 0.682487 | 2.62E-20 | 4.64E-20 |
| Cstf2    | 0.657849 | 2.64E-20 | 4.67E-20 |
| Gm31282  | 2.140009 | 2.90E-20 | 5.14E-20 |
| Nvl      | 0.542131 | 2.94E-20 | 5.20E-20 |
| Gns      | 0.444725 | 3.07E-20 | 5.45E-20 |
| Gm10644  | 1.573717 | 3.09E-20 | 5.48E-20 |
| Gm42633  | 1.416931 | 3.19E-20 | 5.66E-20 |
| Rel      | 0.972521 | 3.20E-20 | 5.66E-20 |
| Pds5a    | 0.402193 | 3.20E-20 | 5.67E-20 |

|          |          |          |          |
|----------|----------|----------|----------|
| Dhfr     | 0.886027 | 3.21E-20 | 5.68E-20 |
| Kirrel   | 0.652874 | 3.24E-20 | 5.73E-20 |
| Gm37174  | 1.482643 | 3.69E-20 | 6.52E-20 |
| Tmem198  | 1.691643 | 3.80E-20 | 6.72E-20 |
| Proser1  | 0.606528 | 4.05E-20 | 7.16E-20 |
| Cfl2     | 0.357131 | 4.34E-20 | 7.67E-20 |
| Rbx1     | 0.237389 | 4.75E-20 | 8.39E-20 |
| Zfp58    | 1.153482 | 4.76E-20 | 8.42E-20 |
| Mettl22  | 1.078228 | 4.86E-20 | 8.59E-20 |
| Tincr    | 1.828718 | 4.97E-20 | 8.77E-20 |
| Zswim3   | 1.31304  | 5.07E-20 | 8.96E-20 |
| Tars2    | 0.771526 | 5.15E-20 | 9.10E-20 |
| Cbwd1    | 0.700925 | 5.20E-20 | 9.18E-20 |
| Rpl10a   | 0.225107 | 5.27E-20 | 9.30E-20 |
| Dock3    | 1.294977 | 5.49E-20 | 9.68E-20 |
| Gm47694  | 1.993177 | 5.65E-20 | 9.96E-20 |
| Brix1    | 0.552206 | 5.67E-20 | 9.99E-20 |
| G630016G | 3.771459 | 6.09E-20 | 1.07E-19 |
| Spef1l   | 2.731991 | 5.99E-20 | 1.06E-19 |
| Rsf1     | 0.331026 | 6.18E-20 | 1.09E-19 |
| Zfp870   | 0.972566 | 6.20E-20 | 1.09E-19 |
| Tmem68   | 0.744868 | 6.46E-20 | 1.14E-19 |
| 2810039B | 1.493052 | 6.47E-20 | 1.14E-19 |
| Rita1    | 1.050825 | 6.60E-20 | 1.16E-19 |
| Gm5373   | 3.246506 | 6.93E-20 | 1.22E-19 |
| Zfp661   | 1.75931  | 7.02E-20 | 1.24E-19 |
| Fbrs     | 0.565192 | 7.06E-20 | 1.24E-19 |
| Gpr162   | 0.90642  | 7.42E-20 | 1.31E-19 |
| Wdr55    | 1.113917 | 7.58E-20 | 1.33E-19 |
| Zfp940   | 1.382867 | 7.62E-20 | 1.34E-19 |
| Pdcd2l   | 0.753504 | 7.64E-20 | 1.34E-19 |
| Gapvd1   | 0.339313 | 7.74E-20 | 1.36E-19 |
| Ccdc90b  | 0.5049   | 7.77E-20 | 1.37E-19 |
| Gm17705  | 2.110696 | 7.98E-20 | 1.40E-19 |
| Gm44430  | 3.138358 | 8.41E-20 | 1.48E-19 |
| Gm47773  | 2.164466 | 8.46E-20 | 1.49E-19 |
| Fam71e1  | 1.182493 | 8.49E-20 | 1.49E-19 |
| Repin1   | 0.766593 | 8.59E-20 | 1.51E-19 |
| Bloc1s4  | 0.549861 | 8.60E-20 | 1.51E-19 |
| Gm10827  | 1.875234 | 8.71E-20 | 1.53E-19 |
| Mettl23  | 0.469729 | 8.83E-20 | 1.55E-19 |
| Srxn1    | 0.861515 | 8.88E-20 | 1.56E-19 |
| Gm43513  | 1.781968 | 9.11E-20 | 1.60E-19 |
| Mettl4   | 0.691229 | 9.46E-20 | 1.66E-19 |
| Gm43081  | 2.43154  | 9.83E-20 | 1.72E-19 |
| Gm50394  | 2.701265 | 1.01E-19 | 1.77E-19 |
| Mad2l1bp | 0.798271 | 9.76E-20 | 1.71E-19 |

|          |          |          |          |
|----------|----------|----------|----------|
| Gm43541  | 2.314113 | 1.02E-19 | 1.78E-19 |
| Gm3052   | 2.461798 | 1.01E-19 | 1.78E-19 |
| Tomm22   | 0.365354 | 1.02E-19 | 1.78E-19 |
| Ddx52    | 0.537512 | 1.02E-19 | 1.79E-19 |
| Paf1     | 0.461045 | 1.05E-19 | 1.84E-19 |
| Col4a4   | 0.686286 | 1.06E-19 | 1.86E-19 |
| Ilvbl    | 0.635952 | 1.08E-19 | 1.90E-19 |
| Zfp768   | 0.680595 | 1.11E-19 | 1.94E-19 |
| Gm43774  | 1.456212 | 1.14E-19 | 1.99E-19 |
| Wipf2    | 0.498108 | 1.15E-19 | 2.02E-19 |
| Unk      | 0.684024 | 1.16E-19 | 2.03E-19 |
| Kif22    | 1.189682 | 1.17E-19 | 2.05E-19 |
| 5730405O | 1.6672   | 1.19E-19 | 2.09E-19 |
| Mllt3    | 0.431227 | 1.23E-19 | 2.16E-19 |
| Gm38315  | 2.518263 | 1.29E-19 | 2.26E-19 |
| Ebi3     | 1.755894 | 1.31E-19 | 2.29E-19 |
| Zfp963   | 1.675852 | 1.33E-19 | 2.32E-19 |
| Pomt1    | 1.016067 | 1.33E-19 | 2.32E-19 |
| Guf1     | 0.5629   | 1.35E-19 | 2.36E-19 |
| Drg2     | 0.661282 | 1.35E-19 | 2.36E-19 |
| Asb13    | 0.623716 | 1.40E-19 | 2.44E-19 |
| Virma    | 0.481092 | 1.44E-19 | 2.52E-19 |
| 0610012G | 0.341687 | 1.45E-19 | 2.54E-19 |
| Gm43628  | 1.252057 | 1.47E-19 | 2.56E-19 |
| Gm48230  | 1.589742 | 1.48E-19 | 2.59E-19 |
| 1700037C | 1.163042 | 1.49E-19 | 2.61E-19 |
| A330041J | 2.350416 | 1.53E-19 | 2.67E-19 |
| Ttc17    | 0.626085 | 1.53E-19 | 2.66E-19 |
| Mfap1a   | 0.425803 | 1.64E-19 | 2.85E-19 |
| Cckbr    | 2.763208 | 1.65E-19 | 2.89E-19 |
| Setmar   | 1.577422 | 1.76E-19 | 3.08E-19 |
| Cenpf    | 2.524217 | 1.79E-19 | 3.12E-19 |
| Gm43144  | 3.779624 | 1.83E-19 | 3.19E-19 |
| Mtch2    | 0.416072 | 1.78E-19 | 3.10E-19 |
| Ccr9     | 2.098052 | 1.91E-19 | 3.33E-19 |
| Dph5     | 0.978408 | 1.90E-19 | 3.32E-19 |
| Sco1     | 0.993335 | 1.92E-19 | 3.34E-19 |
| Eif2d    | 0.793166 | 2.06E-19 | 3.58E-19 |
| A430005L | 0.539029 | 2.07E-19 | 3.60E-19 |
| Dpm2     | 0.513729 | 2.09E-19 | 3.64E-19 |
| Lyst     | 0.397903 | 2.12E-19 | 3.70E-19 |
| Gulp1    | 0.458831 | 2.15E-19 | 3.75E-19 |
| Lancl2   | 0.689485 | 2.16E-19 | 3.75E-19 |
| Dhodh    | 0.870617 | 2.17E-19 | 3.77E-19 |
| Spryd4   | 1.041428 | 2.20E-19 | 3.83E-19 |
| Gm43359  | 0.926612 | 2.28E-19 | 3.96E-19 |
| Polr3gl  | 0.463046 | 2.33E-19 | 4.04E-19 |



|          |          |          |          |
|----------|----------|----------|----------|
| Actr10   | 0.323644 | 2.38E-19 | 4.14E-19 |
| Timm21   | 0.623428 | 2.40E-19 | 4.18E-19 |
| Recql5   | 1.042664 | 2.41E-19 | 4.19E-19 |
| Zcchc10  | 0.588255 | 2.42E-19 | 4.21E-19 |
| Rbm17    | 0.456704 | 2.50E-19 | 4.34E-19 |
| Cnksr1   | 1.705775 | 2.64E-19 | 4.58E-19 |
| Commd2   | 0.474661 | 2.63E-19 | 4.57E-19 |
| Pgp      | 0.34308  | 2.66E-19 | 4.61E-19 |
| Pigw     | 1.586426 | 2.69E-19 | 4.67E-19 |
| Fem1b    | 0.49448  | 2.80E-19 | 4.85E-19 |
| Asphd1   | 1.575643 | 2.84E-19 | 4.93E-19 |
| Cks2     | 1.336344 | 2.86E-19 | 4.96E-19 |
| Gm18292  | 3.969975 | 3.00E-19 | 5.20E-19 |
| Trim60   | 3.40764  | 3.01E-19 | 5.21E-19 |
| Gm47259  | 2.935026 | 3.04E-19 | 5.28E-19 |
| Pcdhga4  | 1.670786 | 3.01E-19 | 5.22E-19 |
| Trmt10b  | 0.85127  | 3.09E-19 | 5.35E-19 |
| 1600023N | 2.247392 | 3.16E-19 | 5.48E-19 |
| Mdfic2   | 3.777544 | 3.29E-19 | 5.70E-19 |
| Myg1     | 0.597155 | 3.56E-19 | 6.16E-19 |
| 4831440D | 2.166597 | 3.76E-19 | 6.51E-19 |
| Acyp1    | 0.519091 | 3.76E-19 | 6.50E-19 |
| Eif4a3   | 0.404885 | 3.78E-19 | 6.55E-19 |
| Aptx     | 0.73606  | 3.86E-19 | 6.68E-19 |
| Ppp2r3c  | 0.754329 | 3.97E-19 | 6.87E-19 |
| Tsen2    | 0.778088 | 4.09E-19 | 7.07E-19 |
| Slbp     | 0.497219 | 4.10E-19 | 7.09E-19 |
| Gm48840  | 1.933674 | 4.32E-19 | 7.46E-19 |
| Atoh7    | 2.687936 | 4.55E-19 | 7.87E-19 |
| Slc25a16 | 0.598592 | 4.58E-19 | 7.92E-19 |
| Gm39326  | 2.296874 | 4.68E-19 | 8.09E-19 |
| Gm28792  | 3.477717 | 4.78E-19 | 8.26E-19 |
| Eif2b2   | 0.564949 | 4.81E-19 | 8.30E-19 |
| Chic1    | 0.705357 | 4.84E-19 | 8.35E-19 |
| Mark2    | 0.393285 | 4.87E-19 | 8.41E-19 |
| Coq5     | 0.545155 | 5.07E-19 | 8.75E-19 |
| Gm44153  | 1.567676 | 5.14E-19 | 8.87E-19 |
| Gm9522   | 2.787299 | 5.28E-19 | 9.12E-19 |
| Gm3145   | 4.233693 | 5.45E-19 | 9.40E-19 |
| Mrpl46   | 0.531662 | 5.22E-19 | 9.02E-19 |
| Glp2r    | 3.302683 | 5.85E-19 | 1.01E-18 |
| Gm48231  | 1.485771 | 5.65E-19 | 9.75E-19 |
| Pi4ka    | 0.524285 | 5.68E-19 | 9.80E-19 |
| Gm29844  | 4.703498 | 6.08E-19 | 1.05E-18 |
| Ccdc65   | 1.15519  | 5.93E-19 | 1.02E-18 |
| Dennd4b  | 0.89626  | 5.95E-19 | 1.03E-18 |
| Gm37463  | 1.901609 | 6.34E-19 | 1.09E-18 |

|           |          |          |          |
|-----------|----------|----------|----------|
| Zfp128    | 1.470205 | 6.38E-19 | 1.10E-18 |
| Clk3      | 0.581685 | 6.53E-19 | 1.13E-18 |
| Fkbp15    | 0.525386 | 6.74E-19 | 1.16E-18 |
| Chchd6    | 0.613444 | 6.85E-19 | 1.18E-18 |
| Gm37529   | 1.51331  | 6.87E-19 | 1.18E-18 |
| Samd10    | 0.964425 | 6.89E-19 | 1.19E-18 |
| Lrrc40    | 0.815913 | 7.07E-19 | 1.22E-18 |
| Zfp182    | 0.839713 | 7.09E-19 | 1.22E-18 |
| Gm3435    | 1.328906 | 7.64E-19 | 1.31E-18 |
| D030047H  | 2.885275 | 7.81E-19 | 1.34E-18 |
| Proser3   | 1.300123 | 7.89E-19 | 1.36E-18 |
| Acd       | 0.658006 | 8.12E-19 | 1.40E-18 |
| Zfp469    | 2.435641 | 8.47E-19 | 1.46E-18 |
| 9430065F  | 1.761091 | 8.33E-19 | 1.43E-18 |
| Neu1      | 0.60976  | 8.34E-19 | 1.43E-18 |
| Ccdc15    | 1.015947 | 8.38E-19 | 1.44E-18 |
| Ebna1bp2  | 0.413961 | 8.80E-19 | 1.51E-18 |
| Gm19412   | 1.305972 | 9.16E-19 | 1.57E-18 |
| 330000210 | 1.494975 | 9.18E-19 | 1.58E-18 |
| Tyw3      | 1.015491 | 9.19E-19 | 1.58E-18 |
| Dimt1     | 0.675859 | 9.32E-19 | 1.60E-18 |
| Hyls1     | 1.374286 | 9.47E-19 | 1.63E-18 |
| AU022252  | 0.641136 | 9.49E-19 | 1.63E-18 |
| Gm42748   | 1.185683 | 9.67E-19 | 1.66E-18 |
| Dhdds     | 0.573306 | 9.84E-19 | 1.69E-18 |
| Frs3      | 1.01311  | 1.04E-18 | 1.79E-18 |
| Patz1     | 0.520085 | 1.10E-18 | 1.89E-18 |
| Phip      | 0.289456 | 1.18E-18 | 2.02E-18 |
| Dazap1    | 0.435616 | 1.18E-18 | 2.03E-18 |
| Slc9a8    | 0.719542 | 1.21E-18 | 2.07E-18 |
| Dnajc7    | 0.344153 | 1.22E-18 | 2.09E-18 |
| Gfus      | 0.587773 | 1.22E-18 | 2.09E-18 |
| Homer3    | 0.635653 | 1.22E-18 | 2.09E-18 |
| Sass6     | 0.859246 | 1.26E-18 | 2.15E-18 |
| Gm48604   | 1.509379 | 1.27E-18 | 2.17E-18 |
| Gm45344   | 3.756052 | 1.39E-18 | 2.38E-18 |
| Zkscan1   | 0.469545 | 1.35E-18 | 2.31E-18 |
| Tox4      | 0.415706 | 1.36E-18 | 2.32E-18 |
| Kcnh6     | 2.053352 | 1.37E-18 | 2.34E-18 |
| Commd3    | 0.363423 | 1.41E-18 | 2.41E-18 |
| Stag3     | 2.776035 | 1.50E-18 | 2.57E-18 |
| Ccdc130   | 0.896215 | 1.59E-18 | 2.72E-18 |
| Myo5a     | 0.617702 | 1.78E-18 | 3.04E-18 |
| Gm13622   | 1.213377 | 1.78E-18 | 3.05E-18 |
| Gm15952   | 1.476816 | 1.80E-18 | 3.07E-18 |
| 2700078F  | 1.904786 | 1.82E-18 | 3.11E-18 |
| Pate2     | 2.527208 | 1.88E-18 | 3.20E-18 |

|           |          |          |          |
|-----------|----------|----------|----------|
| Slc35a2   | 0.658557 | 1.84E-18 | 3.15E-18 |
| Cln5      | 0.995292 | 1.87E-18 | 3.20E-18 |
| Nt5m      | 0.658304 | 1.92E-18 | 3.28E-18 |
| Gm43173   | 2.945435 | 2.01E-18 | 3.43E-18 |
| Gm29257   | 1.986578 | 2.01E-18 | 3.43E-18 |
| A430010J1 | 2.626699 | 2.04E-18 | 3.49E-18 |
| Gm16523   | 1.284903 | 2.05E-18 | 3.50E-18 |
| Gm9967    | 1.907717 | 2.11E-18 | 3.60E-18 |
| Ccz1      | 0.459483 | 2.13E-18 | 3.64E-18 |
| Gm43300   | 1.224336 | 2.15E-18 | 3.66E-18 |
| Nsd3      | 0.323822 | 2.19E-18 | 3.73E-18 |
| Med20     | 0.620337 | 2.19E-18 | 3.73E-18 |
| Gcc1      | 0.77311  | 2.25E-18 | 3.84E-18 |
| Gmpr2     | 0.563023 | 2.27E-18 | 3.87E-18 |
| Gpr107    | 0.500517 | 2.31E-18 | 3.93E-18 |
| Elp1      | 0.637946 | 2.33E-18 | 3.97E-18 |
| Ndc1      | 0.970317 | 2.33E-18 | 3.97E-18 |
| Sipa1l3   | 0.577152 | 2.41E-18 | 4.10E-18 |
| Gm49628   | 1.174527 | 2.40E-18 | 4.09E-18 |
| 4732416N  | 1.499149 | 2.42E-18 | 4.12E-18 |
| Scfd1     | 0.460274 | 2.43E-18 | 4.14E-18 |
| Phf20     | 0.38949  | 2.45E-18 | 4.17E-18 |
| Nkiras1   | 0.534655 | 2.58E-18 | 4.39E-18 |
| Zfp54     | 1.570963 | 2.58E-18 | 4.40E-18 |
| Kri1      | 0.694713 | 2.60E-18 | 4.42E-18 |
| Jpt1      | 0.552259 | 2.64E-18 | 4.50E-18 |
| Secisbp2l | 0.336133 | 2.86E-18 | 4.86E-18 |
| Alg13     | 0.974581 | 3.06E-18 | 5.21E-18 |
| Tjap1     | 0.685523 | 3.28E-18 | 5.59E-18 |
| Sf3b1     | 0.244752 | 3.59E-18 | 6.10E-18 |
| Pramel12  | 0.896253 | 3.61E-18 | 6.15E-18 |
| Xrcc5     | 0.853143 | 3.64E-18 | 6.20E-18 |
| Rab27a    | 1.236296 | 3.68E-18 | 6.26E-18 |
| Spata2    | 0.642679 | 3.83E-18 | 6.50E-18 |
| Dcaf7     | 0.399039 | 3.88E-18 | 6.59E-18 |
| Tomm6os   | 1.799092 | 4.05E-18 | 6.88E-18 |
| Csrnp2    | 1.050129 | 4.03E-18 | 6.84E-18 |
| 4933411O  | 3.620197 | 4.36E-18 | 7.40E-18 |
| Gpat3     | 2.743977 | 4.48E-18 | 7.60E-18 |
| Gm16283   | 2.228728 | 4.57E-18 | 7.76E-18 |
| Ccdc134   | 1.031355 | 4.63E-18 | 7.85E-18 |
| Aplf      | 1.185675 | 4.90E-18 | 8.32E-18 |
| Thrap3    | 0.301597 | 5.25E-18 | 8.90E-18 |
| Slc25a14  | 0.833164 | 5.29E-18 | 8.98E-18 |
| Bex4      | 0.789204 | 5.36E-18 | 9.08E-18 |
| Nup188    | 0.744141 | 5.41E-18 | 9.17E-18 |
| Dtd2      | 0.574359 | 5.58E-18 | 9.46E-18 |

|          |          |          |          |
|----------|----------|----------|----------|
| Gm43667  | 1.027635 | 5.75E-18 | 9.75E-18 |
| Arl14ep  | 0.618939 | 5.83E-18 | 9.88E-18 |
| Nub1     | 0.370007 | 5.95E-18 | 1.01E-17 |
| Fam110a  | 0.588243 | 6.10E-18 | 1.03E-17 |
| BC049715 | 2.859136 | 6.56E-18 | 1.11E-17 |
| Dhcr7    | 0.872754 | 6.50E-18 | 1.10E-17 |
| Gm9028   | 2.570232 | 6.66E-18 | 1.13E-17 |
| Ecd      | 0.591101 | 6.68E-18 | 1.13E-17 |
| Rexo4    | 0.588257 | 6.68E-18 | 1.13E-17 |
| Rbm10    | 0.539606 | 6.73E-18 | 1.14E-17 |
| Gm37906  | 1.028659 | 6.76E-18 | 1.14E-17 |
| Prpf4    | 0.502461 | 7.09E-18 | 1.20E-17 |
| Vps53    | 0.51838  | 7.37E-18 | 1.25E-17 |
| Hspd1    | 0.326756 | 7.37E-18 | 1.25E-17 |
| Pde10a   | 0.764321 | 7.38E-18 | 1.25E-17 |
| Eif2b1   | 0.700535 | 7.52E-18 | 1.27E-17 |
| Gm49785  | 1.735512 | 7.88E-18 | 1.33E-17 |
| Stam     | 0.539281 | 7.89E-18 | 1.33E-17 |
| Jmjd4    | 1.211157 | 8.01E-18 | 1.35E-17 |
| Ccdc97   | 0.61021  | 8.35E-18 | 1.41E-17 |
| Mff      | 0.309684 | 8.44E-18 | 1.42E-17 |
| Ubp1     | 0.466055 | 8.62E-18 | 1.45E-17 |
| Sez6     | 1.07687  | 8.62E-18 | 1.46E-17 |
| Dbr1     | 0.741259 | 8.65E-18 | 1.46E-17 |
| Cog5     | 0.494235 | 8.72E-18 | 1.47E-17 |
| Dcaf11   | 0.464062 | 8.95E-18 | 1.51E-17 |
| Supt5    | 0.356054 | 9.03E-18 | 1.52E-17 |
| Cldn7    | 2.534519 | 9.69E-18 | 1.63E-17 |
| Gm16041  | 3.335195 | 1.06E-17 | 1.78E-17 |
| Zfp35    | 0.8003   | 1.05E-17 | 1.76E-17 |
| Ino80e   | 0.538827 | 1.06E-17 | 1.78E-17 |
| Cab39l   | 0.464522 | 1.06E-17 | 1.79E-17 |
| Galc     | 0.801461 | 1.06E-17 | 1.79E-17 |
| Cmtr1    | 0.889856 | 1.07E-17 | 1.81E-17 |
| Zfp119b  | 1.008055 | 1.08E-17 | 1.83E-17 |
| Gm35554  | 3.566879 | 1.16E-17 | 1.96E-17 |
| Mrpl58   | 0.406226 | 1.15E-17 | 1.93E-17 |
| Rnf19a   | 0.44434  | 1.21E-17 | 2.04E-17 |
| H2-Ke6   | 0.732459 | 1.25E-17 | 2.10E-17 |
| 2310015A | 0.786742 | 1.26E-17 | 2.13E-17 |
| Rnf40    | 0.636007 | 1.35E-17 | 2.26E-17 |
| Zfp330   | 0.469122 | 1.35E-17 | 2.27E-17 |
| Sdhd     | 0.424759 | 1.40E-17 | 2.35E-17 |
| Lamtor3  | 0.438523 | 1.41E-17 | 2.37E-17 |
| Heatr5b  | 0.717243 | 1.42E-17 | 2.39E-17 |
| Ltv1     | 0.739449 | 1.47E-17 | 2.47E-17 |
| Zfp11    | 1.130034 | 1.48E-17 | 2.48E-17 |

|           |          |          |          |
|-----------|----------|----------|----------|
| Ubqln4    | 0.648617 | 1.48E-17 | 2.49E-17 |
| Cdkal1    | 0.578111 | 1.49E-17 | 2.51E-17 |
| Gm13316   | 2.977647 | 1.54E-17 | 2.58E-17 |
| Rnf14     | 0.382377 | 1.53E-17 | 2.57E-17 |
| Mtcp1     | 0.940999 | 1.58E-17 | 2.65E-17 |
| Jmjd1c    | 0.275612 | 1.60E-17 | 2.68E-17 |
| Myrip     | 0.559521 | 1.61E-17 | 2.71E-17 |
| 1110065P  | 0.444106 | 1.63E-17 | 2.73E-17 |
| Gnpda1    | 0.918615 | 1.62E-17 | 2.72E-17 |
| Nat1      | 2.538553 | 1.67E-17 | 2.81E-17 |
| Gm43868   | 2.489747 | 1.70E-17 | 2.85E-17 |
| Kdm8      | 1.578969 | 1.68E-17 | 2.82E-17 |
| Rpia      | 0.641251 | 1.68E-17 | 2.81E-17 |
| Slc35e2   | 0.689171 | 1.69E-17 | 2.83E-17 |
| Atg12     | 0.368448 | 1.69E-17 | 2.84E-17 |
| Gm45555   | 1.148368 | 1.70E-17 | 2.85E-17 |
| Gpat4     | 0.517173 | 1.71E-17 | 2.86E-17 |
| Tpp2      | 0.444453 | 1.72E-17 | 2.89E-17 |
| Arfgef2   | 0.609874 | 1.74E-17 | 2.92E-17 |
| Gm37105   | 1.173219 | 1.77E-17 | 2.97E-17 |
| Prkdc     | 0.766081 | 1.78E-17 | 2.99E-17 |
| Ptpn20    | 3.937356 | 1.92E-17 | 3.21E-17 |
| 2810002D  | 0.839456 | 1.84E-17 | 3.09E-17 |
| Prpf19    | 0.414207 | 1.88E-17 | 3.15E-17 |
| Cdon      | 0.564681 | 1.91E-17 | 3.20E-17 |
| Arhgap27c | 1.778175 | 1.93E-17 | 3.22E-17 |
| Mrpl11    | 0.393784 | 1.95E-17 | 3.26E-17 |
| Ulk3      | 0.9391   | 1.94E-17 | 3.26E-17 |
| Lsg1      | 0.564048 | 1.99E-17 | 3.33E-17 |
| Zfp966    | 1.893719 | 2.01E-17 | 3.36E-17 |
| 2610017A  | 1.957691 | 2.02E-17 | 3.38E-17 |
| Mri1      | 0.744141 | 2.03E-17 | 3.39E-17 |
| Rad51     | 1.918973 | 2.07E-17 | 3.45E-17 |
| Gm14268   | 2.691558 | 2.14E-17 | 3.59E-17 |
| Frg2f1    | 1.30519  | 2.14E-17 | 3.58E-17 |
| D6Wsu163  | 0.850705 | 2.20E-17 | 3.68E-17 |
| Ncor1     | 0.21953  | 2.26E-17 | 3.78E-17 |
| Taf11     | 0.448576 | 2.30E-17 | 3.84E-17 |
| Gm37745   | 1.833143 | 2.39E-17 | 3.99E-17 |
| Brd1      | 0.329475 | 2.39E-17 | 3.99E-17 |
| Gm4247    | 3.051456 | 2.48E-17 | 4.14E-17 |
| Ndufv2    | 0.294026 | 2.49E-17 | 4.16E-17 |
| Jade1     | 0.361104 | 2.51E-17 | 4.19E-17 |
| B9d2      | 0.652574 | 2.50E-17 | 4.18E-17 |
| Gm13066   | 2.565454 | 2.56E-17 | 4.27E-17 |
| Gm43935   | 2.693572 | 2.61E-17 | 4.36E-17 |
| Ubqln2    | 0.397679 | 2.57E-17 | 4.30E-17 |

|          |          |          |          |
|----------|----------|----------|----------|
| Ak6      | 0.555745 | 2.62E-17 | 4.37E-17 |
| 5430400D | 1.945271 | 2.69E-17 | 4.49E-17 |
| Gm43138  | 1.253414 | 2.67E-17 | 4.45E-17 |
| Bclaf3   | 0.558216 | 2.68E-17 | 4.47E-17 |
| Gm45183  | 1.830568 | 2.74E-17 | 4.57E-17 |
| Rfwd3    | 0.623162 | 2.75E-17 | 4.59E-17 |
| Noc3l    | 0.74757  | 2.81E-17 | 4.68E-17 |
| Gm47258  | 1.574388 | 2.84E-17 | 4.74E-17 |
| Pts      | 0.432834 | 3.04E-17 | 5.07E-17 |
| Mmp17    | 1.732143 | 3.10E-17 | 5.17E-17 |
| Timmdc1  | 0.933784 | 3.17E-17 | 5.28E-17 |
| Smyd3    | 0.715392 | 3.18E-17 | 5.30E-17 |
| Gm42728  | 1.701917 | 3.28E-17 | 5.46E-17 |
| Phykpl   | 0.666762 | 3.31E-17 | 5.51E-17 |
| B230307C | 0.83478  | 3.33E-17 | 5.55E-17 |
| Zfp239   | 1.585384 | 3.63E-17 | 6.04E-17 |
| Gm28229  | 1.595541 | 3.83E-17 | 6.38E-17 |
| Mrnip    | 1.188508 | 3.86E-17 | 6.42E-17 |
| Gm45620  | 2.903849 | 4.13E-17 | 6.86E-17 |
| Erlin1   | 0.806055 | 4.02E-17 | 6.69E-17 |
| Arfgap1  | 0.598558 | 4.03E-17 | 6.70E-17 |
| Nup50    | 0.497746 | 4.21E-17 | 7.01E-17 |
| Zfp438   | 0.87377  | 4.35E-17 | 7.24E-17 |
| Pcid2    | 0.660769 | 4.41E-17 | 7.33E-17 |
| Atp6v1c1 | 0.442725 | 4.54E-17 | 7.55E-17 |
| Atp6v0a1 | 0.380862 | 4.57E-17 | 7.60E-17 |
| Uvrag    | 0.43929  | 4.80E-17 | 7.98E-17 |
| Ccdc84   | 0.752423 | 4.84E-17 | 8.05E-17 |
| Letmd1   | 0.88558  | 5.30E-17 | 8.80E-17 |
| Cacng7   | 0.880372 | 5.44E-17 | 9.04E-17 |
| Tbc1d9   | 0.884041 | 5.75E-17 | 9.55E-17 |
| Bcs1l    | 0.839458 | 5.89E-17 | 9.77E-17 |
| Osgin2   | 0.812438 | 5.96E-17 | 9.89E-17 |
| Cwc22    | 0.579331 | 6.07E-17 | 1.01E-16 |
| Al597479 | 0.635819 | 6.28E-17 | 1.04E-16 |
| Tm9sf1   | 0.9561   | 6.32E-17 | 1.05E-16 |
| Gm11368  | 4.290365 | 7.09E-17 | 1.18E-16 |
| Sars2    | 1.138336 | 7.16E-17 | 1.19E-16 |
| Add3     | 0.268243 | 7.32E-17 | 1.21E-16 |
| Sucla2   | 0.392319 | 7.45E-17 | 1.23E-16 |
| Aatf     | 0.686731 | 7.79E-17 | 1.29E-16 |
| Gm47122  | 1.652837 | 7.89E-17 | 1.31E-16 |
| Platr1   | 3.435308 | 8.41E-17 | 1.39E-16 |
| Tprkb    | 0.43719  | 8.26E-17 | 1.37E-16 |
| Lamtor4  | 0.312613 | 8.52E-17 | 1.41E-16 |
| Pomgnt1  | 0.527587 | 8.52E-17 | 1.41E-16 |
| Gm44679  | 1.800012 | 8.61E-17 | 1.43E-16 |

|           |          |          |          |
|-----------|----------|----------|----------|
| Gm38097   | 2.523648 | 8.70E-17 | 1.44E-16 |
| Map1s     | 0.643629 | 9.05E-17 | 1.50E-16 |
| Adam32    | 2.289179 | 9.26E-17 | 1.53E-16 |
| Amt       | 0.958735 | 9.30E-17 | 1.54E-16 |
| Hes7      | 1.883135 | 9.56E-17 | 1.58E-16 |
| Snhg17    | 0.891462 | 9.57E-17 | 1.58E-16 |
| Atp5md    | 0.237076 | 9.85E-17 | 1.63E-16 |
| Trim61    | 2.914033 | 1.01E-16 | 1.66E-16 |
| Adnp2     | 0.628163 | 9.95E-17 | 1.64E-16 |
| Ero1b     | 0.93891  | 1.01E-16 | 1.67E-16 |
| Atrn      | 0.461176 | 1.02E-16 | 1.68E-16 |
| Otop3     | 2.168384 | 1.10E-16 | 1.82E-16 |
| Gm45177   | 2.071812 | 1.11E-16 | 1.82E-16 |
| Bms1      | 0.452976 | 1.11E-16 | 1.82E-16 |
| Zfp780b   | 0.696992 | 1.13E-16 | 1.87E-16 |
| Dnaaf9    | 0.416341 | 1.14E-16 | 1.89E-16 |
| 2310068J1 | 1.803923 | 1.18E-16 | 1.95E-16 |
| Mien1     | 0.339561 | 1.24E-16 | 2.04E-16 |
| Wbp1      | 0.450122 | 1.23E-16 | 2.03E-16 |
| Dnajc19   | 0.371414 | 1.24E-16 | 2.04E-16 |
| Ncapd2    | 1.159717 | 1.23E-16 | 2.03E-16 |
| Gm43267   | 1.872076 | 1.24E-16 | 2.04E-16 |
| Eif2s1    | 0.44438  | 1.25E-16 | 2.06E-16 |
| Osbpl2    | 0.500575 | 1.28E-16 | 2.10E-16 |
| Uchl5     | 0.486427 | 1.29E-16 | 2.12E-16 |
| Atpsckmt  | 0.788022 | 1.30E-16 | 2.14E-16 |
| Pvt1      | 2.647451 | 1.36E-16 | 2.23E-16 |
| Chaf1a    | 1.210588 | 1.36E-16 | 2.24E-16 |
| BC024978  | 1.037449 | 1.37E-16 | 2.25E-16 |
| Mettl21a  | 0.854459 | 1.38E-16 | 2.27E-16 |
| Ern1      | 0.725712 | 1.39E-16 | 2.28E-16 |
| Slc25a3   | 0.212708 | 1.40E-16 | 2.30E-16 |
| Klhl41    | 2.01402  | 1.39E-16 | 2.29E-16 |
| Gm42659   | 0.952758 | 1.40E-16 | 2.30E-16 |
| 3110001I2 | 1.206752 | 1.41E-16 | 2.32E-16 |
| AA386476  | 1.307389 | 1.41E-16 | 2.32E-16 |
| Ssh2      | 0.405786 | 1.43E-16 | 2.35E-16 |
| Tulp4     | 0.300194 | 1.48E-16 | 2.43E-16 |
| Gm44434   | 1.597406 | 1.48E-16 | 2.43E-16 |
| Gm45120   | 1.282722 | 1.49E-16 | 2.44E-16 |
| Abcb7     | 0.59554  | 1.57E-16 | 2.58E-16 |
| 4930589O  | 1.829949 | 1.60E-16 | 2.64E-16 |
| Odf2      | 0.51977  | 1.64E-16 | 2.69E-16 |
| Utp6      | 0.566137 | 1.66E-16 | 2.72E-16 |
| Gm45250   | 1.365966 | 1.71E-16 | 2.81E-16 |
| Ppp1r26   | 1.297433 | 1.74E-16 | 2.85E-16 |
| Dnph1     | 1.877674 | 1.75E-16 | 2.87E-16 |

|           |          |          |          |
|-----------|----------|----------|----------|
| 17000480  | 1.195739 | 1.75E-16 | 2.87E-16 |
| Gm37717   | 4.32114  | 1.81E-16 | 2.97E-16 |
| Shq1      | 1.282395 | 1.77E-16 | 2.90E-16 |
| Dnaja3    | 0.544534 | 1.77E-16 | 2.90E-16 |
| Usp9x     | 0.283744 | 1.78E-16 | 2.92E-16 |
| H1f1      | 2.672766 | 1.86E-16 | 3.05E-16 |
| Gm44863   | 2.31634  | 1.89E-16 | 3.09E-16 |
| Gm42940   | 1.648553 | 1.89E-16 | 3.10E-16 |
| Eif5      | 0.232509 | 1.89E-16 | 3.10E-16 |
| Gm5398    | 4.183385 | 1.99E-16 | 3.26E-16 |
| Pex13     | 0.511598 | 2.03E-16 | 3.32E-16 |
| Ndufb11   | 0.215007 | 2.04E-16 | 3.34E-16 |
| Aifm1     | 0.525945 | 2.08E-16 | 3.40E-16 |
| Tbc1d19   | 0.672091 | 2.09E-16 | 3.43E-16 |
| Gm49066   | 0.902464 | 2.13E-16 | 3.48E-16 |
| Aar2      | 0.589707 | 2.15E-16 | 3.52E-16 |
| Mfsd12    | 0.88489  | 2.17E-16 | 3.55E-16 |
| Mktn2     | 0.547072 | 2.17E-16 | 3.55E-16 |
| Rnf212b   | 1.946348 | 2.19E-16 | 3.58E-16 |
| Mrps30    | 0.576113 | 2.20E-16 | 3.61E-16 |
| Slc25a23  | 0.437295 | 2.35E-16 | 3.84E-16 |
| D11Wsu47  | 1.018734 | 2.49E-16 | 4.08E-16 |
| Ero1a     | 0.464513 | 2.57E-16 | 4.19E-16 |
| Ap3m2     | 0.567007 | 2.70E-16 | 4.41E-16 |
| Pnpla3    | 3.561432 | 3.06E-16 | 5.00E-16 |
| Ube2f     | 0.529136 | 3.04E-16 | 4.97E-16 |
| Cdnf      | 2.116444 | 3.11E-16 | 5.08E-16 |
| Lrrc8d    | 0.603658 | 3.10E-16 | 5.06E-16 |
| 9430087J2 | 1.45923  | 3.13E-16 | 5.11E-16 |
| 4930458D  | 3.547458 | 3.21E-16 | 5.24E-16 |
| Rmc1      | 0.808809 | 3.16E-16 | 5.16E-16 |
| Elac2     | 0.896741 | 3.30E-16 | 5.38E-16 |
| Mynn      | 0.51517  | 3.32E-16 | 5.41E-16 |
| Rrp12     | 1.379917 | 3.39E-16 | 5.53E-16 |
| Wdr61     | 0.36219  | 3.46E-16 | 5.64E-16 |
| Ppm1j     | 1.066328 | 3.46E-16 | 5.63E-16 |
| Zfyve16   | 0.521501 | 3.51E-16 | 5.72E-16 |
| 9230116N  | 1.230693 | 3.52E-16 | 5.74E-16 |
| Ddrgk1    | 0.262938 | 3.53E-16 | 5.75E-16 |
| Gnmt      | 2.237723 | 3.61E-16 | 5.87E-16 |
| Snupn     | 0.674189 | 3.73E-16 | 6.07E-16 |
| Mfsd4b1   | 3.407802 | 3.88E-16 | 6.31E-16 |
| Gm42067   | 0.807423 | 3.81E-16 | 6.20E-16 |
| Gm37402   | 2.768337 | 4.04E-16 | 6.57E-16 |
| Gm43511   | 1.396568 | 4.05E-16 | 6.60E-16 |
| Cyhr1     | 0.312713 | 4.14E-16 | 6.74E-16 |
| Gm37436   | 1.062674 | 4.20E-16 | 6.83E-16 |



|          |          |          |          |
|----------|----------|----------|----------|
| Ranbp10  | 0.557622 | 4.26E-16 | 6.93E-16 |
| Gm37485  | 2.46531  | 4.32E-16 | 7.01E-16 |
| Shld2    | 0.734025 | 4.28E-16 | 6.95E-16 |
| Minpp1   | 0.566565 | 4.33E-16 | 7.04E-16 |
| Ghitm    | 0.28017  | 4.61E-16 | 7.48E-16 |
| B3galt4  | 1.088833 | 4.62E-16 | 7.51E-16 |
| Mast3    | 0.860205 | 4.64E-16 | 7.54E-16 |
| Cd207    | 4.081769 | 4.97E-16 | 8.07E-16 |
| Usp7     | 0.310335 | 4.90E-16 | 7.95E-16 |
| Gm43909  | 3.000979 | 5.07E-16 | 8.23E-16 |
| Pcdhga9  | 1.128145 | 4.95E-16 | 8.04E-16 |
| Nup85    | 0.663383 | 5.00E-16 | 8.11E-16 |
| Tmem168  | 0.503508 | 5.27E-16 | 8.55E-16 |
| Cep76    | 1.005574 | 5.32E-16 | 8.63E-16 |
| Egf      | 1.840025 | 5.38E-16 | 8.74E-16 |
| Adck5    | 0.818271 | 5.43E-16 | 8.81E-16 |
| Mpi      | 0.826432 | 5.48E-16 | 8.89E-16 |
| LTO1     | 0.655422 | 5.51E-16 | 8.94E-16 |
| Gm15789  | 2.390109 | 5.68E-16 | 9.22E-16 |
| Katnb1   | 0.809247 | 5.79E-16 | 9.39E-16 |
| Zfp59    | 1.401391 | 5.88E-16 | 9.54E-16 |
| Gm43748  | 2.971208 | 6.31E-16 | 1.02E-15 |
| Leng9    | 0.702092 | 6.22E-16 | 1.01E-15 |
| Tmem126i | 0.493943 | 6.29E-16 | 1.02E-15 |
| Rbm14    | 0.600766 | 6.31E-16 | 1.02E-15 |
| 6330415G | 2.271334 | 6.57E-16 | 1.06E-15 |
| Cog2     | 0.610306 | 6.50E-16 | 1.05E-15 |
| C330013E | 1.357965 | 6.64E-16 | 1.08E-15 |
| Zfp950   | 0.371235 | 6.65E-16 | 1.08E-15 |
| Scyl3    | 0.739449 | 6.74E-16 | 1.09E-15 |
| Gm6402   | 1.201695 | 6.80E-16 | 1.10E-15 |
| Olig3    | 2.520396 | 6.94E-16 | 1.12E-15 |
| Vps39    | 0.652064 | 6.92E-16 | 1.12E-15 |
| Gm47794  | 2.06522  | 7.03E-16 | 1.14E-15 |
| Gm37904  | 5.023706 | 7.36E-16 | 1.19E-15 |
| Entpd6   | 0.973543 | 7.09E-16 | 1.15E-15 |
| Nop53    | 0.261601 | 7.16E-16 | 1.16E-15 |
| Kcnn1    | 1.856949 | 7.80E-16 | 1.26E-15 |
| Gm45885  | 2.451327 | 7.91E-16 | 1.28E-15 |
| Hsf1     | 0.520893 | 8.09E-16 | 1.31E-15 |
| Pigx     | 0.475553 | 8.48E-16 | 1.37E-15 |
| Arcn1    | 0.318989 | 8.68E-16 | 1.40E-15 |
| Eri3     | 0.555934 | 8.96E-16 | 1.45E-15 |
| Car7     | 1.207696 | 9.57E-16 | 1.55E-15 |
| Otud6b   | 0.448928 | 9.60E-16 | 1.55E-15 |
| Gm31356  | 2.312057 | 9.75E-16 | 1.57E-15 |
| Gm11960  | 2.565235 | 9.85E-16 | 1.59E-15 |

|            |          |          |          |
|------------|----------|----------|----------|
| Vcpkmt     | 0.722406 | 9.72E-16 | 1.57E-15 |
| Ralgapb    | 0.437432 | 9.93E-16 | 1.60E-15 |
| Zfp273     | 0.988189 | 1.05E-15 | 1.70E-15 |
| Zfp287     | 0.727905 | 1.06E-15 | 1.71E-15 |
| Srprb      | 0.510747 | 1.13E-15 | 1.82E-15 |
| Dctn6      | 0.348862 | 1.16E-15 | 1.87E-15 |
| Dnajb12    | 0.519155 | 1.19E-15 | 1.92E-15 |
| Vta1       | 0.430766 | 1.20E-15 | 1.93E-15 |
| Morc2a     | 0.564689 | 1.20E-15 | 1.93E-15 |
| Pwp1       | 0.69019  | 1.20E-15 | 1.94E-15 |
| Tesk2      | 1.108036 | 1.20E-15 | 1.94E-15 |
| Arl6ip6    | 0.50982  | 1.24E-15 | 1.99E-15 |
| Mex3a      | 1.320043 | 1.27E-15 | 2.05E-15 |
| Gm20274    | 1.045607 | 1.30E-15 | 2.09E-15 |
| Zfp105     | 0.842825 | 1.32E-15 | 2.13E-15 |
| Trub1      | 0.778229 | 1.32E-15 | 2.13E-15 |
| 4930581F2  | 0.443711 | 1.33E-15 | 2.14E-15 |
| Myo9a      | 0.351407 | 1.42E-15 | 2.28E-15 |
| Cop1       | 0.402013 | 1.42E-15 | 2.28E-15 |
| Ccdc6      | 0.538256 | 1.43E-15 | 2.31E-15 |
| Zfp939     | 1.089192 | 1.47E-15 | 2.36E-15 |
| B930036N   | 1.651967 | 1.48E-15 | 2.38E-15 |
| Gm9484     | 1.850759 | 1.50E-15 | 2.41E-15 |
| Dvl2       | 0.732767 | 1.60E-15 | 2.57E-15 |
| Psmc2      | 0.332541 | 1.61E-15 | 2.59E-15 |
| Tmem183i   | 0.453445 | 1.62E-15 | 2.60E-15 |
| Dda1       | 0.437631 | 1.65E-15 | 2.65E-15 |
| Wdfy1      | 0.385108 | 1.66E-15 | 2.67E-15 |
| Gm42547    | 0.974584 | 1.66E-15 | 2.67E-15 |
| 3110070N   | 1.673684 | 1.67E-15 | 2.68E-15 |
| Gm10503    | 0.608533 | 1.68E-15 | 2.70E-15 |
| Klc1       | 0.294063 | 1.75E-15 | 2.81E-15 |
| Gm42669    | 2.71789  | 1.78E-15 | 2.85E-15 |
| Kcnd1      | 1.757824 | 1.76E-15 | 2.82E-15 |
| Parg       | 0.514004 | 1.76E-15 | 2.83E-15 |
| Ttc1       | 0.417329 | 1.78E-15 | 2.85E-15 |
| Brf2       | 0.738267 | 1.80E-15 | 2.88E-15 |
| Ino80c     | 0.625783 | 1.80E-15 | 2.89E-15 |
| Zfp513     | 0.652129 | 1.81E-15 | 2.91E-15 |
| Gm43653    | 2.313145 | 1.84E-15 | 2.95E-15 |
| AU040320   | 0.57902  | 1.94E-15 | 3.11E-15 |
| A930005N   | 2.859324 | 1.99E-15 | 3.19E-15 |
| Gm45145    | 3.395068 | 2.03E-15 | 3.26E-15 |
| Ppp4r1l-ps | 0.435187 | 2.16E-15 | 3.46E-15 |
| Atp5k      | 0.219452 | 2.25E-15 | 3.60E-15 |
| Cdh24      | 1.529179 | 2.27E-15 | 3.64E-15 |
| Dph7       | 0.736511 | 2.30E-15 | 3.69E-15 |

|           |          |          |          |
|-----------|----------|----------|----------|
| Rad51b    | 2.099146 | 2.35E-15 | 3.76E-15 |
| Zfp781    | 1.837931 | 2.43E-15 | 3.89E-15 |
| Hibch     | 0.629442 | 2.47E-15 | 3.95E-15 |
| Gm48701   | 2.172038 | 2.49E-15 | 3.99E-15 |
| Sirt5     | 0.665985 | 2.54E-15 | 4.06E-15 |
| Plekhg3   | 0.508024 | 2.64E-15 | 4.22E-15 |
| Pomgnt2   | 0.934426 | 2.63E-15 | 4.21E-15 |
| Samd4b    | 0.37374  | 2.65E-15 | 4.24E-15 |
| L2hgdh    | 0.924752 | 2.69E-15 | 4.30E-15 |
| Asf1b     | 2.105077 | 2.81E-15 | 4.49E-15 |
| Nrbf2     | 0.829418 | 2.81E-15 | 4.49E-15 |
| Dnai2     | 2.062444 | 2.89E-15 | 4.61E-15 |
| Pknnox1   | 0.551951 | 2.88E-15 | 4.60E-15 |
| Shld1     | 0.425377 | 2.93E-15 | 4.68E-15 |
| Psm5      | 0.481561 | 2.93E-15 | 4.69E-15 |
| Rnf20     | 0.38088  | 2.95E-15 | 4.71E-15 |
| Nle1      | 1.042926 | 2.95E-15 | 4.71E-15 |
| Rell2     | 1.166962 | 2.97E-15 | 4.75E-15 |
| Gm37277   | 3.604728 | 3.04E-15 | 4.86E-15 |
| F8a       | 0.660289 | 3.09E-15 | 4.94E-15 |
| D830024N  | 1.800199 | 3.22E-15 | 5.15E-15 |
| Nars      | 0.299262 | 3.28E-15 | 5.23E-15 |
| Zfp276    | 0.835485 | 3.35E-15 | 5.35E-15 |
| Odf2l     | 0.605242 | 3.40E-15 | 5.43E-15 |
| Crebl2    | 0.465341 | 3.45E-15 | 5.51E-15 |
| Lin7b     | 1.356752 | 3.61E-15 | 5.75E-15 |
| Rae1      | 0.494103 | 3.67E-15 | 5.85E-15 |
| Rnf139    | 0.452945 | 3.70E-15 | 5.89E-15 |
| Gm19269   | 2.171006 | 3.73E-15 | 5.94E-15 |
| Cenpa     | 1.002988 | 3.79E-15 | 6.03E-15 |
| Mrps7     | 0.400162 | 3.81E-15 | 6.06E-15 |
| 4930590JC | 1.831756 | 3.89E-15 | 6.20E-15 |
| Gm37305   | 0.977679 | 3.89E-15 | 6.20E-15 |
| Kdm4a     | 0.557449 | 3.93E-15 | 6.26E-15 |
| Ipo5      | 0.446721 | 3.96E-15 | 6.30E-15 |
| Gm48250   | 2.94832  | 4.19E-15 | 6.67E-15 |
| Taf6      | 0.523573 | 4.37E-15 | 6.95E-15 |
| Tmem74    | 2.434252 | 4.41E-15 | 7.02E-15 |
| Adam8     | 2.034808 | 4.44E-15 | 7.06E-15 |
| Cox15     | 0.863648 | 4.62E-15 | 7.34E-15 |
| Cd164     | 0.304636 | 4.70E-15 | 7.47E-15 |
| Atg9a     | 1.108481 | 4.69E-15 | 7.46E-15 |
| Copz1     | 0.384857 | 5.06E-15 | 8.05E-15 |
| Scaf4     | 0.476879 | 5.06E-15 | 8.05E-15 |
| 8030445P  | 1.327711 | 5.24E-15 | 8.32E-15 |
| 5930420M  | 2.00422  | 5.30E-15 | 8.42E-15 |
| Edc4      | 0.528099 | 5.30E-15 | 8.41E-15 |

|          |          |          |          |
|----------|----------|----------|----------|
| Rab26    | 1.271702 | 5.48E-15 | 8.70E-15 |
| Serf1    | 0.677784 | 5.79E-15 | 9.19E-15 |
| Ttll13   | 1.68578  | 5.87E-15 | 9.31E-15 |
| Gm49041  | 1.267738 | 6.30E-15 | 9.99E-15 |
| B4galt7  | 0.794567 | 6.33E-15 | 1.00E-14 |
| Shld3    | 1.304732 | 6.42E-15 | 1.02E-14 |
| Eno4     | 3.221193 | 6.56E-15 | 1.04E-14 |
| Hspbap1  | 1.094046 | 6.49E-15 | 1.03E-14 |
| Gm17092  | 1.103375 | 6.52E-15 | 1.03E-14 |
| Aup1     | 0.375354 | 6.68E-15 | 1.06E-14 |
| Gm15809  | 1.824816 | 6.73E-15 | 1.07E-14 |
| Mapkbp1  | 0.671436 | 6.76E-15 | 1.07E-14 |
| Gm37767  | 1.660776 | 6.98E-15 | 1.11E-14 |
| Zfp389   | 2.901121 | 7.08E-15 | 1.12E-14 |
| Daxx     | 0.545143 | 7.38E-15 | 1.17E-14 |
| Zfp943   | 0.666608 | 7.78E-15 | 1.23E-14 |
| Pgm1     | 0.538177 | 7.81E-15 | 1.24E-14 |
| Gm34411  | 3.437455 | 8.10E-15 | 1.28E-14 |
| Gm16042  | 2.821286 | 8.17E-15 | 1.29E-14 |
| Eapp     | 0.298364 | 8.05E-15 | 1.27E-14 |
| Stk40    | 0.42579  | 8.50E-15 | 1.35E-14 |
| Dnajc25  | 0.675725 | 8.52E-15 | 1.35E-14 |
| 4930453C | 3.041999 | 8.93E-15 | 1.41E-14 |
| Zbtb3    | 1.554012 | 8.83E-15 | 1.40E-14 |
| Gm13868  | 1.033538 | 8.98E-15 | 1.42E-14 |
| Vma21    | 0.397026 | 9.01E-15 | 1.42E-14 |
| Lrrc56   | 1.421882 | 9.08E-15 | 1.44E-14 |
| Puf60    | 0.317076 | 9.15E-15 | 1.45E-14 |
| Nek11    | 3.280279 | 9.43E-15 | 1.49E-14 |
| Xylb     | 1.961148 | 9.63E-15 | 1.52E-14 |
| Fam168b  | 0.3249   | 9.73E-15 | 1.54E-14 |
| Gm45088  | 1.76514  | 9.92E-15 | 1.57E-14 |
| Plekhh1  | 1.30661  | 1.01E-14 | 1.59E-14 |
| Cs       | 0.365979 | 1.01E-14 | 1.60E-14 |
| Gm26852  | 2.203943 | 1.03E-14 | 1.63E-14 |
| Zfp324   | 1.018221 | 1.04E-14 | 1.64E-14 |
| D430013B | 0.93085  | 1.06E-14 | 1.67E-14 |
| Gm47580  | 1.184465 | 1.06E-14 | 1.67E-14 |
| Ccdc9    | 0.52288  | 1.07E-14 | 1.68E-14 |
| Ppp2r5d  | 0.519366 | 1.10E-14 | 1.73E-14 |
| Nup54    | 0.546105 | 1.11E-14 | 1.75E-14 |
| Gm12905  | 1.915154 | 1.13E-14 | 1.78E-14 |
| Sepsecs  | 0.72951  | 1.14E-14 | 1.79E-14 |
| Dnaja2   | 0.267303 | 1.18E-14 | 1.87E-14 |
| Gm10857  | 2.879083 | 1.21E-14 | 1.90E-14 |
| Zc3h10   | 0.673219 | 1.25E-14 | 1.98E-14 |
| Haus5    | 0.903924 | 1.27E-14 | 1.99E-14 |

|          |          |          |          |
|----------|----------|----------|----------|
| 1110032A | 0.503207 | 1.29E-14 | 2.03E-14 |
| Gm43668  | 1.205402 | 1.34E-14 | 2.11E-14 |
| Gm45629  | 1.662888 | 1.43E-14 | 2.25E-14 |
| Ddx31    | 1.117015 | 1.43E-14 | 2.25E-14 |
| Zfp433   | 2.333476 | 1.49E-14 | 2.35E-14 |
| Kat7     | 0.424088 | 1.51E-14 | 2.38E-14 |
| Maz      | 0.374078 | 1.56E-14 | 2.45E-14 |
| Med8     | 0.460184 | 1.56E-14 | 2.45E-14 |
| Usp28    | 0.874614 | 1.57E-14 | 2.47E-14 |
| Gm45662  | 2.506367 | 1.58E-14 | 2.49E-14 |
| Rabggta  | 0.728814 | 1.62E-14 | 2.55E-14 |
| Dcp1a    | 0.63472  | 1.64E-14 | 2.59E-14 |
| Klhl7    | 0.53637  | 1.66E-14 | 2.61E-14 |
| Nek1     | 0.569214 | 1.83E-14 | 2.87E-14 |
| Nup43    | 0.891979 | 1.85E-14 | 2.91E-14 |
| Psme3    | 0.485492 | 1.90E-14 | 2.99E-14 |
| Mrpl40   | 0.485935 | 1.91E-14 | 3.00E-14 |
| Gm26736  | 3.106167 | 1.98E-14 | 3.11E-14 |
| Zw10     | 0.620337 | 2.02E-14 | 3.17E-14 |
| Ribc1    | 1.626547 | 2.19E-14 | 3.43E-14 |
| Gm15829  | 2.69116  | 2.32E-14 | 3.64E-14 |
| Arhgef11 | 0.529471 | 2.35E-14 | 3.68E-14 |
| Ngdn     | 0.427124 | 2.35E-14 | 3.68E-14 |
| Gm7420   | 3.860783 | 2.42E-14 | 3.79E-14 |
| Mterf1b  | 1.791295 | 2.38E-14 | 3.73E-14 |
| Gm47817  | 0.889515 | 2.38E-14 | 3.73E-14 |
| 4921534A | 2.506279 | 2.43E-14 | 3.82E-14 |
| Cul2     | 0.521192 | 2.43E-14 | 3.81E-14 |
| 4930563E | 4.033088 | 2.56E-14 | 4.01E-14 |
| Rfc5     | 1.035525 | 2.51E-14 | 3.93E-14 |
| Gm9776   | 1.247181 | 2.51E-14 | 3.94E-14 |
| Clcn1    | 2.180853 | 2.59E-14 | 4.05E-14 |
| Scly     | 0.751912 | 2.58E-14 | 4.04E-14 |
| Agps     | 0.489731 | 2.58E-14 | 4.05E-14 |
| Coq2     | 0.439319 | 2.59E-14 | 4.06E-14 |
| 2900060B | 1.046364 | 2.79E-14 | 4.37E-14 |
| Abcf3    | 0.485216 | 2.98E-14 | 4.66E-14 |
| Polr3g   | 1.197841 | 3.09E-14 | 4.83E-14 |
| Rad23b   | 0.329044 | 3.14E-14 | 4.92E-14 |
| Rundc3b  | 1.398833 | 3.17E-14 | 4.95E-14 |
| Gm10916  | 2.243604 | 3.22E-14 | 5.03E-14 |
| Gm37296  | 1.17094  | 3.19E-14 | 4.98E-14 |
| Stim1    | 0.396367 | 3.21E-14 | 5.03E-14 |
| Gm49932  | 1.89648  | 3.23E-14 | 5.06E-14 |
| Zfp202   | 1.39277  | 3.31E-14 | 5.18E-14 |
| Cramp1   | 0.45714  | 3.39E-14 | 5.30E-14 |
| Gm9042   | 2.347879 | 3.48E-14 | 5.44E-14 |

|          |          |          |          |
|----------|----------|----------|----------|
| Atp6v0d1 | 0.340859 | 3.46E-14 | 5.41E-14 |
| Gm37459  | 3.271194 | 3.54E-14 | 5.53E-14 |
| Arl5a    | 0.389631 | 3.71E-14 | 5.79E-14 |
| 4930481B | 2.233748 | 3.78E-14 | 5.90E-14 |
| Vrk3     | 0.448215 | 3.76E-14 | 5.88E-14 |
| 1500012K | 2.681763 | 3.85E-14 | 6.00E-14 |
| H2bc3    | 2.281445 | 3.83E-14 | 5.98E-14 |
| Med18    | 0.871729 | 3.88E-14 | 6.05E-14 |
| Sall3    | 1.436409 | 3.88E-14 | 6.05E-14 |
| Isg2012  | 0.607097 | 3.93E-14 | 6.13E-14 |
| Slc24a2  | 1.303521 | 3.95E-14 | 6.17E-14 |
| Zbtb33   | 0.604465 | 4.08E-14 | 6.36E-14 |
| Strn     | 0.500853 | 4.16E-14 | 6.49E-14 |
| Cntd1    | 2.005807 | 4.20E-14 | 6.56E-14 |
| Nsun3    | 0.785867 | 4.19E-14 | 6.54E-14 |
| 4632411P | 2.384014 | 4.26E-14 | 6.65E-14 |
| Gm11508  | 2.063124 | 4.27E-14 | 6.66E-14 |
| Gm38043  | 0.984195 | 4.33E-14 | 6.75E-14 |
| Gm49284  | 1.946992 | 4.51E-14 | 7.03E-14 |
| Gtf2f1   | 0.439089 | 4.68E-14 | 7.29E-14 |
| Rev3l    | 0.392085 | 4.71E-14 | 7.34E-14 |
| Gm37524  | 1.32388  | 5.00E-14 | 7.78E-14 |
| 8430429K | 0.84035  | 5.19E-14 | 8.09E-14 |
| Gm40332  | 2.402395 | 5.41E-14 | 8.43E-14 |
| Mrm3     | 0.763515 | 5.47E-14 | 8.51E-14 |
| Tepsin   | 0.851285 | 5.47E-14 | 8.52E-14 |
| Pars2    | 1.173635 | 5.57E-14 | 8.66E-14 |
| Ywhae    | 0.173056 | 6.30E-14 | 9.81E-14 |
| Snrnp40  | 0.4464   | 6.35E-14 | 9.88E-14 |
| Fer      | 0.470503 | 6.45E-14 | 1.00E-13 |
| Ensa     | 0.294755 | 6.70E-14 | 1.04E-13 |
| Gatd1    | 0.543335 | 6.77E-14 | 1.05E-13 |
| 4930404I | 4.049072 | 7.02E-14 | 1.09E-13 |
| Depdc5   | 0.612725 | 6.89E-14 | 1.07E-13 |
| Utp15    | 0.641983 | 6.92E-14 | 1.08E-13 |
| Ankrd24  | 0.645934 | 7.03E-14 | 1.09E-13 |
| Adssl1   | 0.743849 | 7.16E-14 | 1.11E-13 |
| Usp14    | 0.386504 | 7.28E-14 | 1.13E-13 |
| Gm38300  | 1.643319 | 7.32E-14 | 1.14E-13 |
| 4833445I | 2.392746 | 7.82E-14 | 1.21E-13 |
| Pogk     | 0.428588 | 7.80E-14 | 1.21E-13 |
| Zkscan3  | 0.321858 | 7.98E-14 | 1.24E-13 |
| Zfp119a  | 0.808654 | 7.97E-14 | 1.24E-13 |
| A730071L | 2.595925 | 8.12E-14 | 1.26E-13 |
| Spata48  | 2.759857 | 8.12E-14 | 1.26E-13 |
| Tsen15   | 0.455832 | 8.09E-14 | 1.26E-13 |
| Arfgef3  | 0.783898 | 8.09E-14 | 1.25E-13 |

|          |          |          |          |
|----------|----------|----------|----------|
| Tti2     | 0.673249 | 8.48E-14 | 1.31E-13 |
| Trim28   | 0.38342  | 8.65E-14 | 1.34E-13 |
| Macrocl1 | 0.852615 | 8.69E-14 | 1.35E-13 |
| Asns     | 1.028506 | 8.75E-14 | 1.36E-13 |
| Smg9     | 0.611205 | 8.77E-14 | 1.36E-13 |
| Rnf183   | 2.084804 | 9.06E-14 | 1.40E-13 |
| Arl5b    | 0.454653 | 9.33E-14 | 1.45E-13 |
| Mapk8ip3 | 0.35688  | 9.49E-14 | 1.47E-13 |
| A530058N | 3.098985 | 9.89E-14 | 1.53E-13 |
| Klhdc3   | 0.509539 | 9.87E-14 | 1.53E-13 |
| Mafb     | 0.616751 | 1.00E-13 | 1.55E-13 |
| 5730507A | 1.049103 | 1.02E-13 | 1.58E-13 |
| Gm17435  | 1.466653 | 1.09E-13 | 1.68E-13 |
| Fbxo31   | 0.596418 | 1.09E-13 | 1.69E-13 |
| Pcdhga2  | 1.277738 | 1.11E-13 | 1.72E-13 |
| Fuz      | 0.565568 | 1.14E-13 | 1.76E-13 |
| Zfp114   | 2.100954 | 1.15E-13 | 1.79E-13 |
| Nme6     | 0.745314 | 1.17E-13 | 1.81E-13 |
| Kptn     | 0.675713 | 1.17E-13 | 1.81E-13 |
| Pkmyt1   | 1.935606 | 1.18E-13 | 1.82E-13 |
| Rnf115   | 0.379336 | 1.18E-13 | 1.82E-13 |
| Utp18    | 0.553336 | 1.18E-13 | 1.83E-13 |
| Gm49422  | 2.395809 | 1.21E-13 | 1.87E-13 |
| Lipt1    | 1.363034 | 1.20E-13 | 1.85E-13 |
| Trmt61b  | 0.730251 | 1.20E-13 | 1.86E-13 |
| Gm48708  | 2.421443 | 1.23E-13 | 1.90E-13 |
| Gm15283  | 0.878635 | 1.23E-13 | 1.89E-13 |
| Gm38020  | 1.155029 | 1.23E-13 | 1.90E-13 |
| Ebag9    | 0.542082 | 1.24E-13 | 1.91E-13 |
| Gm12540  | 2.33814  | 1.25E-13 | 1.93E-13 |
| Zfp26    | 0.509507 | 1.25E-13 | 1.93E-13 |
| Gm12758  | 0.782333 | 1.26E-13 | 1.95E-13 |
| Ptcd1    | 0.778216 | 1.26E-13 | 1.95E-13 |
| Ing4     | 0.944758 | 1.26E-13 | 1.95E-13 |
| Gm37628  | 1.338502 | 1.29E-13 | 1.99E-13 |
| Erdr1    | 1.646079 | 1.31E-13 | 2.02E-13 |
| Lin37    | 0.547817 | 1.31E-13 | 2.02E-13 |
| Zfp282   | 0.603683 | 1.31E-13 | 2.02E-13 |
| Lzic     | 0.601712 | 1.33E-13 | 2.06E-13 |
| Sct      | 2.053501 | 1.35E-13 | 2.08E-13 |
| Rrs1     | 0.672362 | 1.38E-13 | 2.12E-13 |
| Prdm10   | 0.801113 | 1.45E-13 | 2.23E-13 |
| Ercc3    | 0.549687 | 1.45E-13 | 2.24E-13 |
| Gm45151  | 2.068142 | 1.47E-13 | 2.27E-13 |
| Slc4a5   | 1.249745 | 1.48E-13 | 2.29E-13 |
| Gm37383  | 2.073804 | 1.50E-13 | 2.32E-13 |
| Snrpf    | 0.274435 | 1.54E-13 | 2.37E-13 |

|          |          |          |          |
|----------|----------|----------|----------|
| A230056P | 1.692918 | 1.54E-13 | 2.37E-13 |
| Gm43379  | 0.950595 | 1.55E-13 | 2.39E-13 |
| Gpn1     | 0.541687 | 1.60E-13 | 2.46E-13 |
| Emg1     | 0.315749 | 1.63E-13 | 2.51E-13 |
| Papolg   | 0.645865 | 1.63E-13 | 2.52E-13 |
| Gm6787   | 3.229814 | 1.77E-13 | 2.72E-13 |
| Trp53rka | 0.578226 | 1.77E-13 | 2.73E-13 |
| C030037D | 0.803947 | 1.80E-13 | 2.77E-13 |
| Zscan21  | 0.617452 | 1.81E-13 | 2.78E-13 |
| 7SK-87   | 4.543405 | 1.90E-13 | 2.92E-13 |
| Poc1a    | 1.392916 | 1.91E-13 | 2.93E-13 |
| Tbccd1   | 0.722693 | 1.93E-13 | 2.97E-13 |
| Ccn6     | 3.407165 | 1.99E-13 | 3.06E-13 |
| BC051226 | 0.746546 | 1.98E-13 | 3.05E-13 |
| B130021K | 1.005593 | 2.00E-13 | 3.07E-13 |
| Sumo1    | 0.237863 | 2.01E-13 | 3.09E-13 |
| Zfand1   | 0.620774 | 2.03E-13 | 3.11E-13 |
| Thap1    | 0.726861 | 2.04E-13 | 3.14E-13 |
| Cox5b    | 0.201269 | 2.05E-13 | 3.16E-13 |
| Trp53bp2 | 0.483659 | 2.09E-13 | 3.21E-13 |
| Brd9     | 0.318213 | 2.16E-13 | 3.32E-13 |
| Gm49694  | 1.526961 | 2.19E-13 | 3.36E-13 |
| Coq3     | 0.809567 | 2.22E-13 | 3.41E-13 |
| Cenps    | 1.260322 | 2.24E-13 | 3.44E-13 |
| Bivm     | 0.737686 | 2.25E-13 | 3.45E-13 |
| Gm4925   | 2.377536 | 2.29E-13 | 3.51E-13 |
| Gm42983  | 3.377156 | 2.33E-13 | 3.57E-13 |
| Mindy4   | 0.812931 | 2.31E-13 | 3.54E-13 |
| Chchd5   | 0.54537  | 2.36E-13 | 3.62E-13 |
| Gm29427  | 2.535155 | 2.38E-13 | 3.64E-13 |
| Mvd      | 0.948299 | 2.38E-13 | 3.65E-13 |
| Wdr93    | 3.579692 | 2.49E-13 | 3.81E-13 |
| Urgcp    | 0.557043 | 2.52E-13 | 3.86E-13 |
| 6030442K | 1.401317 | 2.53E-13 | 3.88E-13 |
| Smpd4    | 0.664994 | 2.59E-13 | 3.97E-13 |
| Ube2k    | 0.264759 | 2.61E-13 | 3.99E-13 |
| Myo19    | 1.150205 | 2.64E-13 | 4.04E-13 |
| Gm13665  | 2.133769 | 2.67E-13 | 4.09E-13 |
| Nprl3    | 0.694708 | 2.68E-13 | 4.11E-13 |
| Gm37983  | 1.775729 | 2.73E-13 | 4.18E-13 |
| Epb41l3  | 0.666526 | 2.78E-13 | 4.25E-13 |
| Gprasp1  | 0.40961  | 2.83E-13 | 4.33E-13 |
| Nup88    | 0.424238 | 2.86E-13 | 4.38E-13 |
| Ndufab1  | 0.291141 | 2.88E-13 | 4.41E-13 |
| Metap1   | 0.512353 | 2.88E-13 | 4.41E-13 |
| Pcyox1l  | 0.933212 | 2.93E-13 | 4.48E-13 |
| Gm37566  | 1.089471 | 3.01E-13 | 4.59E-13 |



|          |          |          |          |
|----------|----------|----------|----------|
| Zfp511   | 0.476232 | 3.01E-13 | 4.60E-13 |
| Gm2233   | 2.496954 | 3.03E-13 | 4.64E-13 |
| Ccdc150  | 2.602979 | 3.11E-13 | 4.76E-13 |
| Thap12   | 0.31317  | 3.17E-13 | 4.85E-13 |
| Ttc13    | 0.646366 | 3.24E-13 | 4.94E-13 |
| Atad3a   | 0.627531 | 3.45E-13 | 5.27E-13 |
| Lin54    | 0.585519 | 3.48E-13 | 5.32E-13 |
| Dph3     | 0.308901 | 3.56E-13 | 5.44E-13 |
| 1700084E | 1.098836 | 3.57E-13 | 5.44E-13 |
| Tpmt     | 0.677507 | 3.74E-13 | 5.71E-13 |
| Arid1b   | 0.343924 | 3.76E-13 | 5.74E-13 |
| Ncln     | 0.511116 | 3.78E-13 | 5.77E-13 |
| Gm47583  | 1.455242 | 3.87E-13 | 5.91E-13 |
| Prpf8    | 0.273476 | 4.10E-13 | 6.26E-13 |
| Zfp319   | 0.495482 | 4.10E-13 | 6.25E-13 |
| Gm43275  | 1.390996 | 4.32E-13 | 6.58E-13 |
| Tada1    | 0.563957 | 4.33E-13 | 6.60E-13 |
| Psm11    | 0.27854  | 4.44E-13 | 6.76E-13 |
| Phf5a    | 0.320293 | 4.45E-13 | 6.79E-13 |
| Gm44702  | 1.849712 | 4.71E-13 | 7.17E-13 |
| Ube2cbp  | 1.655642 | 4.86E-13 | 7.41E-13 |
| Coa8     | 0.354018 | 4.90E-13 | 7.46E-13 |
| Tmem129  | 0.66355  | 4.99E-13 | 7.61E-13 |
| Slc26a8  | 2.053711 | 5.05E-13 | 7.68E-13 |
| Ubf1     | 0.454047 | 5.07E-13 | 7.72E-13 |
| Dzip3    | 0.562021 | 5.14E-13 | 7.82E-13 |
| Phka1    | 0.716757 | 5.19E-13 | 7.89E-13 |
| Mrpl16   | 0.516357 | 5.34E-13 | 8.13E-13 |
| E130018N | 2.248969 | 5.40E-13 | 8.21E-13 |
| Ublcp1   | 0.397743 | 5.47E-13 | 8.33E-13 |
| Xndc1    | 0.685563 | 5.55E-13 | 8.44E-13 |
| Pcnx3    | 0.44719  | 5.75E-13 | 8.75E-13 |
| Gm38230  | 3.775051 | 5.89E-13 | 8.96E-13 |
| Gm42737  | 1.236045 | 6.06E-13 | 9.22E-13 |
| Vrk1     | 0.560793 | 6.13E-13 | 9.33E-13 |
| Ep400    | 0.285893 | 6.14E-13 | 9.33E-13 |
| Tmem203  | 0.554447 | 6.37E-13 | 9.68E-13 |
| L3mbtl2  | 0.689555 | 6.73E-13 | 1.02E-12 |
| Gm16023  | 1.327414 | 6.79E-13 | 1.03E-12 |
| Sbk1     | 0.604656 | 6.87E-13 | 1.04E-12 |
| Hdhd5    | 0.876124 | 6.86E-13 | 1.04E-12 |
| Mid1     | 0.535418 | 6.95E-13 | 1.06E-12 |
| Asb1     | 0.805242 | 7.00E-13 | 1.06E-12 |
| Cox6c    | 0.169083 | 7.13E-13 | 1.08E-12 |
| Mrpl21   | 0.352039 | 7.45E-13 | 1.13E-12 |
| Zfand5   | 0.237436 | 7.47E-13 | 1.13E-12 |
| 2310039H | 0.458229 | 7.53E-13 | 1.14E-12 |

|           |          |          |          |
|-----------|----------|----------|----------|
| Gm48532   | 2.667655 | 7.76E-13 | 1.18E-12 |
| Kdm5a     | 0.291454 | 7.77E-13 | 1.18E-12 |
| Gm39214   | 1.960346 | 7.87E-13 | 1.19E-12 |
| 1700052K  | 0.866355 | 7.87E-13 | 1.19E-12 |
| Nrde2     | 0.620373 | 7.98E-13 | 1.21E-12 |
| Usp36     | 0.430786 | 8.15E-13 | 1.24E-12 |
| Gm4890    | 1.089412 | 8.21E-13 | 1.24E-12 |
| Srpkl     | 0.33027  | 8.77E-13 | 1.33E-12 |
| Gm12846   | 3.050657 | 9.66E-13 | 1.46E-12 |
| Zfp142    | 0.578696 | 9.65E-13 | 1.46E-12 |
| Chn1      | 0.450928 | 9.86E-13 | 1.49E-12 |
| Gpaa1     | 0.494791 | 1.01E-12 | 1.53E-12 |
| Gm36445   | 1.525115 | 1.03E-12 | 1.56E-12 |
| Rnaset2b  | 0.523157 | 1.07E-12 | 1.62E-12 |
| Gstp1     | 0.371033 | 1.08E-12 | 1.63E-12 |
| Gm47372   | 2.698005 | 1.11E-12 | 1.68E-12 |
| Gm42722   | 3.189202 | 1.12E-12 | 1.69E-12 |
| Gtpbp8    | 0.595093 | 1.14E-12 | 1.73E-12 |
| Arhgap19  | 1.150327 | 1.15E-12 | 1.73E-12 |
| Srrt      | 0.365274 | 1.15E-12 | 1.74E-12 |
| Top3b     | 0.468216 | 1.15E-12 | 1.74E-12 |
| Polr3d    | 0.612499 | 1.16E-12 | 1.75E-12 |
| Lrwd1     | 0.679461 | 1.16E-12 | 1.75E-12 |
| Gm28731   | 1.778321 | 1.21E-12 | 1.83E-12 |
| Gm39469   | 1.267204 | 1.21E-12 | 1.82E-12 |
| Zfp821    | 0.541646 | 1.26E-12 | 1.91E-12 |
| Fth-ps2   | 1.592989 | 1.28E-12 | 1.93E-12 |
| Bysl      | 0.611538 | 1.32E-12 | 2.00E-12 |
| Fbxo30    | 0.436525 | 1.33E-12 | 2.01E-12 |
| Pdss2     | 0.713792 | 1.33E-12 | 2.01E-12 |
| Dnaaf2    | 1.464421 | 1.39E-12 | 2.09E-12 |
| Gm12987   | 1.479054 | 1.44E-12 | 2.17E-12 |
| Nfya      | 0.516543 | 1.45E-12 | 2.19E-12 |
| Gpbp1l1   | 0.329825 | 1.48E-12 | 2.23E-12 |
| Arhgap26- | 0.419264 | 1.50E-12 | 2.27E-12 |
| Zfp867    | 0.760563 | 1.51E-12 | 2.28E-12 |
| Gabpb1    | 0.447159 | 1.52E-12 | 2.30E-12 |
| Gm2109    | 1.814643 | 1.56E-12 | 2.35E-12 |
| Tmem130   | 1.10137  | 1.59E-12 | 2.40E-12 |
| Btbd2     | 0.450242 | 1.65E-12 | 2.49E-12 |
| Rnf165    | 0.741209 | 1.68E-12 | 2.52E-12 |
| Zfp91     | 0.282833 | 1.68E-12 | 2.54E-12 |
| Afg3l2    | 0.510226 | 1.69E-12 | 2.54E-12 |
| Dhx35     | 0.819341 | 1.70E-12 | 2.56E-12 |
| Grhpr     | 0.489743 | 1.71E-12 | 2.58E-12 |
| Snapc2    | 0.601772 | 1.72E-12 | 2.59E-12 |
| Grpel1    | 0.289625 | 1.75E-12 | 2.63E-12 |

|          |          |          |          |
|----------|----------|----------|----------|
| Nek10    | 2.991299 | 1.78E-12 | 2.67E-12 |
| Mpv17l2  | 0.537135 | 1.76E-12 | 2.66E-12 |
| Dnajc17  | 0.552673 | 1.87E-12 | 2.81E-12 |
| Zfp14    | 0.988039 | 1.88E-12 | 2.82E-12 |
| Crbn     | 0.41099  | 1.93E-12 | 2.91E-12 |
| Gm37978  | 1.458033 | 1.94E-12 | 2.91E-12 |
| Helb     | 0.698977 | 1.97E-12 | 2.95E-12 |
| Asb6     | 0.666325 | 2.03E-12 | 3.05E-12 |
| Aig1     | 0.348751 | 2.04E-12 | 3.07E-12 |
| Nup153   | 0.412915 | 2.04E-12 | 3.07E-12 |
| Pfdn2    | 0.233931 | 2.11E-12 | 3.17E-12 |
| Parn     | 0.489425 | 2.13E-12 | 3.19E-12 |
| Elavl1   | 0.307875 | 2.13E-12 | 3.20E-12 |
| Ddx51    | 0.850992 | 2.15E-12 | 3.23E-12 |
| Pla2g3   | 2.513667 | 2.25E-12 | 3.38E-12 |
| Txlng    | 0.49801  | 2.30E-12 | 3.45E-12 |
| Pifo     | 2.442343 | 2.31E-12 | 3.47E-12 |
| Grip1    | 0.947731 | 2.36E-12 | 3.55E-12 |
| Zfp639   | 0.362019 | 2.38E-12 | 3.56E-12 |
| Tti1     | 0.688708 | 2.43E-12 | 3.65E-12 |
| Slc25a46 | 0.436728 | 2.48E-12 | 3.72E-12 |
| Pdzd7    | 2.159562 | 2.49E-12 | 3.73E-12 |
| Nfu1     | 0.346509 | 2.49E-12 | 3.73E-12 |
| Gm38393  | 1.017373 | 2.49E-12 | 3.74E-12 |
| Nat9     | 0.495429 | 2.50E-12 | 3.75E-12 |
| Gm10184  | 2.333275 | 2.56E-12 | 3.84E-12 |
| Dcun1d1  | 0.416638 | 2.63E-12 | 3.94E-12 |
| Sox30    | 2.835443 | 2.69E-12 | 4.04E-12 |
| Malsu1   | 0.388802 | 2.67E-12 | 4.00E-12 |
| A930029G | 1.502888 | 2.72E-12 | 4.08E-12 |
| Zfp953   | 0.994017 | 2.87E-12 | 4.30E-12 |
| Zfp971   | 0.919766 | 2.88E-12 | 4.32E-12 |
| Timm13   | 0.230308 | 2.93E-12 | 4.39E-12 |
| Gm19337  | 1.197444 | 2.94E-12 | 4.40E-12 |
| Arfrp1   | 0.374992 | 2.99E-12 | 4.48E-12 |
| Pycr2    | 0.424258 | 3.05E-12 | 4.57E-12 |
| Gm10638  | 0.790429 | 3.15E-12 | 4.71E-12 |
| Zfp169   | 1.026098 | 3.18E-12 | 4.76E-12 |
| Marchf8  | 0.431038 | 3.24E-12 | 4.84E-12 |
| Kifc5b   | 1.63493  | 3.38E-12 | 5.06E-12 |
| Ccng1    | 0.438189 | 3.41E-12 | 5.09E-12 |
| Gm38142  | 1.656938 | 3.50E-12 | 5.24E-12 |
| Zswim7   | 0.616618 | 3.51E-12 | 5.24E-12 |
| Efcab5   | 1.886932 | 3.51E-12 | 5.25E-12 |
| Sik3     | 0.344541 | 3.66E-12 | 5.46E-12 |
| Lsm1     | 0.402223 | 3.71E-12 | 5.54E-12 |
| Zfp454   | 1.373493 | 3.71E-12 | 5.55E-12 |

|           |          |          |          |
|-----------|----------|----------|----------|
| A730061H  | 2.012781 | 3.76E-12 | 5.61E-12 |
| Vps51     | 0.696807 | 3.78E-12 | 5.65E-12 |
| Qsox2     | 0.553049 | 3.83E-12 | 5.73E-12 |
| Gnasas1   | 3.01274  | 3.92E-12 | 5.86E-12 |
| Cptp      | 0.833622 | 3.90E-12 | 5.82E-12 |
| Mrps31    | 0.464353 | 3.94E-12 | 5.88E-12 |
| AW146154  | 0.791852 | 3.94E-12 | 5.88E-12 |
| Nmbr      | 2.452508 | 4.05E-12 | 6.05E-12 |
| Zfp316    | 0.681596 | 4.08E-12 | 6.09E-12 |
| Gm34961   | 1.671566 | 4.22E-12 | 6.30E-12 |
| Fam90a1b  | 3.595557 | 4.32E-12 | 6.44E-12 |
| Zbtb25    | 0.863307 | 4.41E-12 | 6.59E-12 |
| 6430550D  | 2.377138 | 4.56E-12 | 6.81E-12 |
| Gm43863   | 1.585871 | 4.54E-12 | 6.77E-12 |
| Snapc4    | 0.833871 | 4.57E-12 | 6.82E-12 |
| Chid1     | 0.661472 | 4.58E-12 | 6.83E-12 |
| Gm44037   | 1.705269 | 4.59E-12 | 6.85E-12 |
| Vipr2     | 0.73403  | 4.60E-12 | 6.86E-12 |
| Wdr74     | 0.536036 | 4.61E-12 | 6.87E-12 |
| Gm47481   | 2.128783 | 4.67E-12 | 6.96E-12 |
| Tm7sf2    | 1.100752 | 4.66E-12 | 6.94E-12 |
| Sgsm2     | 0.695046 | 4.67E-12 | 6.96E-12 |
| Ptgr2     | 0.458077 | 4.68E-12 | 6.98E-12 |
| Nkiras2   | 0.560535 | 4.84E-12 | 7.21E-12 |
| Bora      | 1.048648 | 4.87E-12 | 7.25E-12 |
| Tmem150i  | 0.666668 | 5.01E-12 | 7.46E-12 |
| Gm49307   | 1.031803 | 5.10E-12 | 7.60E-12 |
| Gm32250   | 2.095905 | 5.14E-12 | 7.65E-12 |
| Gm9996    | 2.843677 | 5.22E-12 | 7.77E-12 |
| Gm3055    | 1.55083  | 5.16E-12 | 7.68E-12 |
| Rpph1     | 2.826905 | 5.34E-12 | 7.95E-12 |
| Slc39a2   | 1.701687 | 5.34E-12 | 7.94E-12 |
| Grsf1     | 0.400595 | 5.54E-12 | 8.24E-12 |
| Cabyr     | 2.410852 | 5.69E-12 | 8.46E-12 |
| Gm49538   | 1.507447 | 5.72E-12 | 8.50E-12 |
| 1700086O  | 0.919502 | 5.93E-12 | 8.82E-12 |
| Tuft1     | 0.999947 | 6.15E-12 | 9.15E-12 |
| Gm15627   | 1.60205  | 6.40E-12 | 9.51E-12 |
| Zkscan14  | 0.677703 | 6.63E-12 | 9.85E-12 |
| Pigv      | 0.703932 | 6.66E-12 | 9.89E-12 |
| Ttc7b     | 0.362396 | 6.71E-12 | 9.97E-12 |
| C730045N  | 0.882832 | 6.76E-12 | 1.00E-11 |
| Hprt      | 0.234659 | 6.89E-12 | 1.02E-11 |
| 8430419Kl | 2.422625 | 7.37E-12 | 1.09E-11 |
| 2900045O  | 2.297563 | 7.51E-12 | 1.11E-11 |
| Rnf146    | 0.340076 | 7.56E-12 | 1.12E-11 |
| Pom121    | 0.391833 | 7.69E-12 | 1.14E-11 |

|           |          |          |          |
|-----------|----------|----------|----------|
| Gm14966   | 1.069486 | 7.72E-12 | 1.15E-11 |
| Gm48966   | 1.620423 | 7.82E-12 | 1.16E-11 |
| A730017L  | 1.079521 | 7.93E-12 | 1.18E-11 |
| Gm17891   | 2.872038 | 8.06E-12 | 1.20E-11 |
| Cox16     | 0.524119 | 8.00E-12 | 1.19E-11 |
| Slc3a1    | 2.715664 | 8.12E-12 | 1.20E-11 |
| Glb1l     | 1.18119  | 8.21E-12 | 1.22E-11 |
| Dkc1      | 0.378014 | 8.48E-12 | 1.26E-11 |
| Zfp626    | 0.593109 | 8.52E-12 | 1.26E-11 |
| Zfp148    | 0.243661 | 8.59E-12 | 1.27E-11 |
| Scamp1    | 0.289746 | 8.81E-12 | 1.31E-11 |
| Ndufaf1   | 0.631023 | 8.84E-12 | 1.31E-11 |
| Pak4      | 0.514688 | 8.99E-12 | 1.33E-11 |
| Umps      | 0.780919 | 9.10E-12 | 1.35E-11 |
| Echdc1    | 0.546845 | 9.10E-12 | 1.35E-11 |
| Tmem9b    | 0.344583 | 9.15E-12 | 1.35E-11 |
| Ccdc32    | 0.440398 | 9.15E-12 | 1.35E-11 |
| Gm7968    | 1.765608 | 9.35E-12 | 1.38E-11 |
| Gm37027   | 2.487217 | 9.62E-12 | 1.42E-11 |
| Gm27010   | 1.274001 | 9.61E-12 | 1.42E-11 |
| Terf2     | 0.411842 | 9.76E-12 | 1.44E-11 |
| Gm50107   | 1.036689 | 9.84E-12 | 1.45E-11 |
| Rtn4rl1   | 0.570143 | 9.97E-12 | 1.47E-11 |
| Gm20517   | 1.727311 | 9.97E-12 | 1.47E-11 |
| Gm10130   | 1.149125 | 1.07E-11 | 1.58E-11 |
| Wfs1      | 0.571295 | 1.07E-11 | 1.58E-11 |
| Sin3a     | 0.354735 | 1.15E-11 | 1.70E-11 |
| Cep83os   | 0.736187 | 1.18E-11 | 1.74E-11 |
| Btf3-ps18 | 1.574516 | 1.18E-11 | 1.74E-11 |
| Gm44291   | 0.849466 | 1.18E-11 | 1.74E-11 |
| Nom1      | 0.423936 | 1.21E-11 | 1.79E-11 |
| Elof1     | 0.320276 | 1.22E-11 | 1.80E-11 |
| Utp14a    | 0.438093 | 1.24E-11 | 1.84E-11 |
| Slamf1    | 1.954165 | 1.25E-11 | 1.85E-11 |
| Gm16794   | 1.084256 | 1.26E-11 | 1.86E-11 |
| Ythdf1    | 0.363836 | 1.26E-11 | 1.86E-11 |
| Cdh4      | 0.746222 | 1.27E-11 | 1.88E-11 |
| Zfp619    | 1.035715 | 1.29E-11 | 1.90E-11 |
| Wdpcp     | 0.96411  | 1.29E-11 | 1.90E-11 |
| Kdm1a     | 0.297663 | 1.29E-11 | 1.91E-11 |
| Phf1      | 0.358019 | 1.32E-11 | 1.95E-11 |
| Gm37678   | 2.137903 | 1.34E-11 | 1.98E-11 |
| Kif17     | 1.773745 | 1.34E-11 | 1.97E-11 |
| Naa30     | 0.438135 | 1.36E-11 | 2.00E-11 |
| Kn11      | 1.841175 | 1.39E-11 | 2.05E-11 |
| Gm33989   | 0.369308 | 1.41E-11 | 2.07E-11 |
| Gm49449   | 2.234549 | 1.49E-11 | 2.20E-11 |

|           |          |          |          |
|-----------|----------|----------|----------|
| Gm46350   | 1.927264 | 1.49E-11 | 2.20E-11 |
| Engase    | 0.8764   | 1.49E-11 | 2.20E-11 |
| 1110038B  | 0.53586  | 1.53E-11 | 2.25E-11 |
| Cbfa2t2   | 0.512218 | 1.53E-11 | 2.25E-11 |
| Ints1     | 0.469022 | 1.53E-11 | 2.26E-11 |
| Pclaf     | 2.144787 | 1.55E-11 | 2.28E-11 |
| Gm12971   | 1.693317 | 1.54E-11 | 2.27E-11 |
| Gm44249   | 2.349444 | 1.56E-11 | 2.30E-11 |
| Tbc1d17   | 0.373626 | 1.57E-11 | 2.32E-11 |
| Col7a1    | 1.24465  | 1.58E-11 | 2.32E-11 |
| Gm50340   | 1.572142 | 1.59E-11 | 2.35E-11 |
| Irgq      | 0.537654 | 1.60E-11 | 2.35E-11 |
| Gtf2h4    | 0.677642 | 1.64E-11 | 2.42E-11 |
| Tyw1      | 0.637022 | 1.64E-11 | 2.42E-11 |
| Gm45289   | 1.244837 | 1.67E-11 | 2.46E-11 |
| Gm48904   | 2.12859  | 1.69E-11 | 2.48E-11 |
| A230072E  | 1.673251 | 1.70E-11 | 2.50E-11 |
| Sp2       | 0.480629 | 1.75E-11 | 2.58E-11 |
| Frs2      | 0.434335 | 1.76E-11 | 2.58E-11 |
| Otud3     | 0.973983 | 1.81E-11 | 2.66E-11 |
| Topors    | 0.330272 | 1.86E-11 | 2.73E-11 |
| Mettl2    | 0.735701 | 1.86E-11 | 2.73E-11 |
| Gm9694    | 2.704815 | 1.89E-11 | 2.77E-11 |
| Men1      | 0.487865 | 1.87E-11 | 2.75E-11 |
| Gm29107   | 0.668387 | 1.89E-11 | 2.77E-11 |
| Gm37979   | 2.571322 | 1.91E-11 | 2.81E-11 |
| Gm48624   | 1.687055 | 1.98E-11 | 2.91E-11 |
| Gm50273   | 2.294928 | 2.00E-11 | 2.94E-11 |
| Mmab      | 0.926703 | 2.01E-11 | 2.95E-11 |
| Rab4a     | 0.422807 | 2.01E-11 | 2.95E-11 |
| Dynll1    | 0.159758 | 2.02E-11 | 2.97E-11 |
| Vps72     | 0.380042 | 2.03E-11 | 2.98E-11 |
| Zfp28     | 0.920917 | 2.09E-11 | 3.07E-11 |
| Kdm4b     | 0.575085 | 2.09E-11 | 3.07E-11 |
| Trmt2a    | 0.48822  | 2.15E-11 | 3.16E-11 |
| Gm36989   | 0.975227 | 2.16E-11 | 3.17E-11 |
| Brf1      | 0.464843 | 2.20E-11 | 3.23E-11 |
| Gm45551   | 2.377832 | 2.23E-11 | 3.27E-11 |
| Hyal1     | 0.59614  | 2.23E-11 | 3.26E-11 |
| Rpl19-ps6 | 1.594118 | 2.26E-11 | 3.32E-11 |
| Gm37127   | 1.820726 | 2.28E-11 | 3.35E-11 |
| 1190007I0 | 0.544799 | 2.30E-11 | 3.37E-11 |
| Sharpin   | 0.427385 | 2.38E-11 | 3.49E-11 |
| Gm8373    | 1.954944 | 2.42E-11 | 3.54E-11 |
| Hic2      | 0.675315 | 2.41E-11 | 3.53E-11 |
| Thap11    | 0.411375 | 2.43E-11 | 3.55E-11 |
| Serpinc1  | 1.683914 | 2.47E-11 | 3.62E-11 |

|           |          |          |          |
|-----------|----------|----------|----------|
| Nr2c1     | 0.59123  | 2.54E-11 | 3.72E-11 |
| Rnf43     | 2.607819 | 2.64E-11 | 3.87E-11 |
| Cdc16     | 0.421888 | 2.64E-11 | 3.87E-11 |
| Cenpn     | 1.588059 | 2.70E-11 | 3.95E-11 |
| Camsap3   | 1.181228 | 2.70E-11 | 3.95E-11 |
| Nop2      | 0.689716 | 2.71E-11 | 3.96E-11 |
| Nfat5     | 0.2075   | 2.73E-11 | 3.99E-11 |
| Nipa2     | 0.372863 | 2.81E-11 | 4.11E-11 |
| Gm38014   | 1.271719 | 2.85E-11 | 4.16E-11 |
| Gm44144   | 1.046425 | 2.89E-11 | 4.22E-11 |
| 4930565N  | 1.744322 | 2.90E-11 | 4.24E-11 |
| Gm9929    | 2.156203 | 2.91E-11 | 4.25E-11 |
| Ice1      | 0.351778 | 2.99E-11 | 4.37E-11 |
| Snapin    | 0.366686 | 3.00E-11 | 4.38E-11 |
| Knstrn    | 1.616109 | 3.04E-11 | 4.45E-11 |
| Nfatc3    | 0.356623 | 3.11E-11 | 4.54E-11 |
| Mycbp     | 0.442149 | 3.14E-11 | 4.59E-11 |
| Bcl2l15   | 2.354919 | 3.32E-11 | 4.84E-11 |
| Rab11fip3 | 0.494632 | 3.32E-11 | 4.85E-11 |
| Alg6      | 0.503628 | 3.36E-11 | 4.90E-11 |
| Haspin    | 2.059252 | 3.52E-11 | 5.13E-11 |
| Gm37850   | 2.114237 | 3.57E-11 | 5.20E-11 |
| Gm42467   | 0.931543 | 3.55E-11 | 5.17E-11 |
| Hmg20a    | 0.324495 | 3.58E-11 | 5.23E-11 |
| Lifr      | 0.263373 | 3.61E-11 | 5.26E-11 |
| Oma1      | 0.518271 | 3.66E-11 | 5.34E-11 |
| Gm45797   | 1.194719 | 3.81E-11 | 5.56E-11 |
| Ccdc120   | 1.173865 | 3.85E-11 | 5.62E-11 |
| Zscan2    | 0.867702 | 3.85E-11 | 5.62E-11 |
| Aldoc     | 0.229674 | 3.94E-11 | 5.74E-11 |
| Gm18283   | 2.739294 | 4.06E-11 | 5.92E-11 |
| Pkn2      | 0.225362 | 4.04E-11 | 5.89E-11 |
| 1700026J1 | 1.738774 | 4.09E-11 | 5.96E-11 |
| Slc37a4   | 0.624055 | 4.18E-11 | 6.09E-11 |
| 5930411N  | 2.169742 | 4.52E-11 | 6.58E-11 |
| Zmynd19   | 0.692916 | 4.52E-11 | 6.58E-11 |
| Rad1      | 0.567032 | 4.54E-11 | 6.61E-11 |
| Gemin5    | 0.675089 | 4.63E-11 | 6.73E-11 |
| Gm47652   | 1.513407 | 4.85E-11 | 7.06E-11 |
| Trmt44    | 0.813994 | 4.85E-11 | 7.06E-11 |
| Polq      | 2.373596 | 4.91E-11 | 7.15E-11 |
| Ankib1    | 0.36617  | 4.95E-11 | 7.21E-11 |
| Psme4     | 0.360812 | 5.04E-11 | 7.32E-11 |
| Gm37949   | 1.154691 | 5.06E-11 | 7.36E-11 |
| Gm29395   | 2.74117  | 5.09E-11 | 7.40E-11 |
| Gss       | 0.614301 | 5.13E-11 | 7.46E-11 |
| Mrps5     | 0.313521 | 5.27E-11 | 7.66E-11 |

|          |          |          |          |
|----------|----------|----------|----------|
| Zfp712   | 0.802028 | 5.27E-11 | 7.66E-11 |
| Cyb561a3 | 0.74402  | 5.44E-11 | 7.91E-11 |
| Cby1     | 0.430286 | 5.48E-11 | 7.97E-11 |
| Prkcsh   | 0.373137 | 5.54E-11 | 8.04E-11 |
| Eif2ak3  | 0.556311 | 5.55E-11 | 8.07E-11 |
| Taf5l    | 0.508178 | 5.68E-11 | 8.24E-11 |
| Fbrsl1   | 0.385137 | 5.96E-11 | 8.65E-11 |
| Ruvbl2   | 0.45942  | 6.00E-11 | 8.72E-11 |
| Cep170b  | 0.61256  | 6.21E-11 | 9.02E-11 |
| Ess2     | 0.505058 | 6.54E-11 | 9.49E-11 |
| Mmgt1    | 0.47877  | 6.57E-11 | 9.53E-11 |
| Gm45570  | 1.7471   | 6.70E-11 | 9.72E-11 |
| Gm41077  | 2.078094 | 6.74E-11 | 9.77E-11 |
| Gm28370  | 2.363982 | 6.78E-11 | 9.83E-11 |
| Gm44027  | 1.434193 | 6.80E-11 | 9.86E-11 |
| Bcl2l2   | 0.429943 | 6.99E-11 | 1.01E-10 |
| Zfp85    | 0.913862 | 7.05E-11 | 1.02E-10 |
| Dusp12   | 0.585686 | 7.08E-11 | 1.03E-10 |
| Fastkd3  | 0.846026 | 7.22E-11 | 1.05E-10 |
| Gm49970  | 1.283487 | 7.33E-11 | 1.06E-10 |
| Surf2    | 0.501798 | 7.34E-11 | 1.06E-10 |
| Rab2b    | 0.414574 | 7.57E-11 | 1.10E-10 |
| Mtx3     | 0.616697 | 7.69E-11 | 1.11E-10 |
| Fastkd2  | 0.911008 | 7.70E-11 | 1.11E-10 |
| Gm26935  | 1.29992  | 7.78E-11 | 1.13E-10 |
| Them6    | 0.522054 | 7.98E-11 | 1.16E-10 |
| Zfp994   | 0.569688 | 8.00E-11 | 1.16E-10 |
| Senp6    | 0.220587 | 8.15E-11 | 1.18E-10 |
| Trim33   | 0.313722 | 8.16E-11 | 1.18E-10 |
| Slc7a6os | 0.567698 | 8.28E-11 | 1.20E-10 |
| Mfsd4b4  | 1.404322 | 8.54E-11 | 1.24E-10 |
| Erich6   | 2.415702 | 8.59E-11 | 1.24E-10 |
| Psme3ip1 | 0.34934  | 8.87E-11 | 1.28E-10 |
| Atf7     | 0.319669 | 8.90E-11 | 1.29E-10 |
| Zfp493   | 1.575352 | 9.23E-11 | 1.33E-10 |
| Orc5     | 0.634492 | 9.42E-11 | 1.36E-10 |
| Sufu     | 0.529954 | 9.50E-11 | 1.37E-10 |
| Cstf1    | 0.655649 | 9.65E-11 | 1.39E-10 |
| Hace1    | 0.503277 | 9.93E-11 | 1.43E-10 |
| Wdhd1    | 1.041777 | 1.00E-10 | 1.45E-10 |
| Jmjd7    | 0.960062 | 1.02E-10 | 1.48E-10 |
| Scarna2  | 1.77668  | 1.03E-10 | 1.49E-10 |
| Dars2    | 0.797559 | 1.05E-10 | 1.51E-10 |
| Gm37639  | 1.147906 | 1.05E-10 | 1.52E-10 |
| Cd300lf  | 2.088954 | 1.06E-10 | 1.54E-10 |
| Gm37914  | 1.109055 | 1.07E-10 | 1.54E-10 |
| Gm17241  | 1.910319 | 1.08E-10 | 1.56E-10 |



|           |          |          |          |
|-----------|----------|----------|----------|
| 4930592C: | 2.240114 | 1.09E-10 | 1.57E-10 |
| Phtf2     | 0.708247 | 1.10E-10 | 1.59E-10 |
| Gm43571   | 0.974557 | 1.19E-10 | 1.72E-10 |
| Gm38077   | 1.365353 | 1.20E-10 | 1.73E-10 |
| 1700066B: | 2.114412 | 1.22E-10 | 1.76E-10 |
| C130051F: | 0.820463 | 1.23E-10 | 1.77E-10 |
| Gm7628    | 1.081441 | 1.24E-10 | 1.79E-10 |
| Polr1a    | 0.60292  | 1.25E-10 | 1.80E-10 |
| Clpp      | 0.304649 | 1.26E-10 | 1.81E-10 |
| Armc2     | 1.411359 | 1.28E-10 | 1.84E-10 |
| Apbb3     | 0.659155 | 1.28E-10 | 1.85E-10 |
| Cetn2     | 0.276833 | 1.34E-10 | 1.93E-10 |
| Spty2d1   | 0.357324 | 1.34E-10 | 1.93E-10 |
| Abcf2     | 0.402323 | 1.42E-10 | 2.05E-10 |
| Tubg1     | 0.488038 | 1.47E-10 | 2.12E-10 |
| Aven      | 0.650719 | 1.51E-10 | 2.17E-10 |
| Gm29650   | 1.152386 | 1.51E-10 | 2.18E-10 |
| Gm28112   | 2.241347 | 1.54E-10 | 2.22E-10 |
| Slc7a3    | 2.056886 | 1.56E-10 | 2.25E-10 |
| Nanp      | 0.609886 | 1.56E-10 | 2.24E-10 |
| Cnot9     | 0.534677 | 1.65E-10 | 2.37E-10 |
| Atl1      | 0.62197  | 1.65E-10 | 2.37E-10 |
| Gm47140   | 2.161197 | 1.70E-10 | 2.44E-10 |
| 1810059C: | 2.448665 | 1.72E-10 | 2.47E-10 |
| Tpo       | 2.477794 | 1.77E-10 | 2.55E-10 |
| Gm45428   | 2.71727  | 1.79E-10 | 2.58E-10 |
| Gm45185   | 2.393489 | 1.79E-10 | 2.57E-10 |
| Zbtb12    | 0.625416 | 1.79E-10 | 2.57E-10 |
| 1110003F: | 1.105025 | 1.84E-10 | 2.64E-10 |
| Gm15580   | 1.999306 | 1.85E-10 | 2.66E-10 |
| Rprd2     | 0.307325 | 1.85E-10 | 2.66E-10 |
| Gm15892   | 1.30942  | 1.87E-10 | 2.68E-10 |
| Itgb1bp2  | 2.603966 | 1.89E-10 | 2.71E-10 |
| Fam185a   | 1.065904 | 1.89E-10 | 2.72E-10 |
| Pex14     | 0.510595 | 1.90E-10 | 2.72E-10 |
| Lrrc20    | 0.664083 | 1.93E-10 | 2.78E-10 |
| Ssr1      | 0.241358 | 1.95E-10 | 2.79E-10 |
| Borcs6    | 0.368752 | 2.01E-10 | 2.89E-10 |
| Gm37967   | 1.264242 | 2.07E-10 | 2.98E-10 |
| Trappc1   | 0.327551 | 2.08E-10 | 2.98E-10 |
| Pmpcb     | 0.324265 | 2.09E-10 | 3.00E-10 |
| Mrpl19    | 0.511106 | 2.14E-10 | 3.06E-10 |
| Efl1      | 0.559751 | 2.15E-10 | 3.08E-10 |
| Ascc2     | 0.484009 | 2.16E-10 | 3.09E-10 |
| Tmub1     | 0.561181 | 2.16E-10 | 3.10E-10 |
| Ash2l     | 0.384365 | 2.19E-10 | 3.14E-10 |
| Ptpn23    | 0.49005  | 2.22E-10 | 3.19E-10 |

|           |          |          |          |
|-----------|----------|----------|----------|
| 1300014J1 | 1.362033 | 2.22E-10 | 3.19E-10 |
| H2bc9     | 1.994338 | 2.25E-10 | 3.22E-10 |
| Ndufa9    | 0.300828 | 2.29E-10 | 3.28E-10 |
| Snhg9     | 0.543275 | 2.31E-10 | 3.31E-10 |
| Mcm9      | 0.603075 | 2.32E-10 | 3.33E-10 |
| Slc9a1    | 0.504708 | 2.34E-10 | 3.35E-10 |
| Cfap46    | 1.832635 | 2.37E-10 | 3.39E-10 |
| Gm43437   | 1.316236 | 2.44E-10 | 3.49E-10 |
| Msantd1   | 1.793868 | 2.46E-10 | 3.52E-10 |
| Abce1     | 0.344005 | 2.46E-10 | 3.53E-10 |
| Smcr8     | 0.625944 | 2.46E-10 | 3.53E-10 |
| F11       | 2.979922 | 2.50E-10 | 3.58E-10 |
| Gm44704   | 1.386064 | 2.49E-10 | 3.57E-10 |
| Rundc1    | 0.590036 | 2.50E-10 | 3.57E-10 |
| Gm30531   | 1.22721  | 2.50E-10 | 3.58E-10 |
| Cyb5d2    | 0.519852 | 2.53E-10 | 3.62E-10 |
| Gm45380   | 1.002867 | 2.54E-10 | 3.63E-10 |
| Tmem74b   | 2.372114 | 2.58E-10 | 3.69E-10 |
| Exosc10   | 0.374494 | 2.58E-10 | 3.69E-10 |
| Zfp160    | 0.476107 | 2.58E-10 | 3.69E-10 |
| Trim3     | 0.437573 | 2.62E-10 | 3.75E-10 |
| Adprs     | 0.438317 | 2.71E-10 | 3.88E-10 |
| Chchd1    | 0.244173 | 2.74E-10 | 3.92E-10 |
| Gm15903   | 1.39119  | 2.99E-10 | 4.26E-10 |
| Gm37307   | 1.735246 | 2.99E-10 | 4.27E-10 |
| Msantd2   | 0.454685 | 3.00E-10 | 4.28E-10 |
| Cmc4      | 0.525281 | 3.01E-10 | 4.30E-10 |
| Gm45694   | 2.793018 | 3.05E-10 | 4.35E-10 |
| Tefm      | 0.721371 | 3.03E-10 | 4.33E-10 |
| Cux2      | 0.958499 | 3.04E-10 | 4.34E-10 |
| Gm44053   | 1.827587 | 3.06E-10 | 4.37E-10 |
| Dcaf13    | 0.386912 | 3.09E-10 | 4.41E-10 |
| Gm19710   | 2.180504 | 3.12E-10 | 4.45E-10 |
| Pfdn4     | 0.362631 | 3.11E-10 | 4.44E-10 |
| Gm37589   | 0.92828  | 3.12E-10 | 4.45E-10 |
| Zfp956    | 0.883088 | 3.15E-10 | 4.49E-10 |
| Gm9725    | 2.473317 | 3.20E-10 | 4.56E-10 |
| Prxl2b    | 0.377397 | 3.21E-10 | 4.57E-10 |
| Atpaf2    | 0.674941 | 3.30E-10 | 4.71E-10 |
| Fastkd5   | 0.867895 | 3.34E-10 | 4.75E-10 |
| Gskip     | 0.42577  | 3.37E-10 | 4.80E-10 |
| Gm46378   | 1.737744 | 3.42E-10 | 4.87E-10 |
| Smg8      | 0.574354 | 3.42E-10 | 4.87E-10 |
| Slc30a5   | 0.406844 | 3.45E-10 | 4.91E-10 |
| Aaas      | 0.678299 | 3.48E-10 | 4.95E-10 |
| Rbsn      | 0.41978  | 3.53E-10 | 5.03E-10 |
| Aldh18a1  | 1.014271 | 3.54E-10 | 5.04E-10 |

|          |          |          |          |
|----------|----------|----------|----------|
| Gm43707  | 1.312201 | 3.58E-10 | 5.10E-10 |
| Mrps34   | 0.338207 | 3.71E-10 | 5.27E-10 |
| 2010204K | 1.244179 | 3.75E-10 | 5.34E-10 |
| Scrib    | 0.469901 | 3.77E-10 | 5.36E-10 |
| Actr8    | 0.394631 | 3.78E-10 | 5.37E-10 |
| Oga      | 0.242071 | 3.85E-10 | 5.47E-10 |
| Gm15327  | 1.301355 | 3.94E-10 | 5.60E-10 |
| Gsk3a    | 0.321075 | 4.00E-10 | 5.68E-10 |
| Zfp560   | 0.378257 | 4.10E-10 | 5.83E-10 |
| Gm14212  | 1.550401 | 4.13E-10 | 5.88E-10 |
| Snx24    | 0.593914 | 4.21E-10 | 5.98E-10 |
| Epm2a    | 0.594468 | 4.21E-10 | 5.99E-10 |
| Ints8    | 0.464601 | 4.23E-10 | 6.01E-10 |
| Itpkc    | 0.884454 | 4.27E-10 | 6.06E-10 |
| Mc1r     | 1.048147 | 4.27E-10 | 6.07E-10 |
| Piwil2   | 1.913568 | 4.59E-10 | 6.53E-10 |
| Mtor     | 0.397598 | 4.67E-10 | 6.63E-10 |
| Gm48382  | 0.854094 | 4.68E-10 | 6.64E-10 |
| Gm37879  | 0.857712 | 4.75E-10 | 6.75E-10 |
| Gm37578  | 0.90404  | 4.81E-10 | 6.84E-10 |
| Gm6225   | 1.225677 | 4.86E-10 | 6.90E-10 |
| Zfp629   | 0.535413 | 4.91E-10 | 6.97E-10 |
| Cops9    | 0.199587 | 4.99E-10 | 7.08E-10 |
| Gm37710  | 2.318913 | 5.01E-10 | 7.11E-10 |
| Gm37206  | 0.897034 | 5.03E-10 | 7.14E-10 |
| Hp1bp3   | 0.202829 | 5.13E-10 | 7.28E-10 |
| Sf3b6    | 0.214401 | 5.15E-10 | 7.30E-10 |
| Mief1    | 0.582505 | 5.23E-10 | 7.42E-10 |
| Poll     | 0.810612 | 5.32E-10 | 7.54E-10 |
| Map2k3os | 1.373082 | 5.33E-10 | 7.55E-10 |
| Acp2     | 0.414231 | 5.37E-10 | 7.61E-10 |
| Gm15460  | 1.488127 | 5.43E-10 | 7.70E-10 |
| Gm43062  | 1.434323 | 5.52E-10 | 7.82E-10 |
| Osgepl1  | 0.52755  | 5.55E-10 | 7.86E-10 |
| Tfb1m    | 1.008651 | 5.56E-10 | 7.88E-10 |
| Gm37212  | 1.488746 | 5.93E-10 | 8.40E-10 |
| Ftsj1    | 0.509364 | 6.06E-10 | 8.58E-10 |
| Lrrc47   | 0.439854 | 6.09E-10 | 8.63E-10 |
| Tm2d1    | 0.282292 | 6.13E-10 | 8.68E-10 |
| Gm47322  | 1.709912 | 6.14E-10 | 8.70E-10 |
| Sh2d2a   | 2.423394 | 6.21E-10 | 8.79E-10 |
| Gm45206  | 1.973708 | 6.25E-10 | 8.84E-10 |
| Letm1    | 0.349733 | 6.39E-10 | 9.04E-10 |
| Nol9     | 0.612197 | 6.49E-10 | 9.19E-10 |
| Usp30    | 0.633129 | 6.69E-10 | 9.47E-10 |
| Wdr5     | 0.499711 | 6.79E-10 | 9.60E-10 |
| Ssbp3    | 0.275778 | 7.05E-10 | 9.97E-10 |

|           |          |          |          |
|-----------|----------|----------|----------|
| Mtmr3     | 0.313393 | 7.08E-10 | 1.00E-09 |
| Xrn2      | 0.251039 | 7.22E-10 | 1.02E-09 |
| Pcdhgb6   | 1.163676 | 7.27E-10 | 1.03E-09 |
| Gm15879   | 1.962326 | 7.37E-10 | 1.04E-09 |
| Syne4     | 1.630115 | 7.38E-10 | 1.04E-09 |
| Wdr82     | 0.325458 | 7.39E-10 | 1.04E-09 |
| Smrcb1    | 0.298179 | 7.51E-10 | 1.06E-09 |
| Spink10   | 0.98932  | 7.60E-10 | 1.07E-09 |
| Nubpl     | 0.581392 | 7.61E-10 | 1.08E-09 |
| Gm35721   | 1.971148 | 7.75E-10 | 1.09E-09 |
| Arnt      | 0.324949 | 7.92E-10 | 1.12E-09 |
| Agtrap    | 0.33883  | 7.96E-10 | 1.12E-09 |
| E430024I0 | 0.72676  | 7.98E-10 | 1.13E-09 |
| Plppr2    | 0.821763 | 8.04E-10 | 1.13E-09 |
| Gm29361   | 1.414617 | 8.08E-10 | 1.14E-09 |
| Gm10557   | 1.336194 | 8.11E-10 | 1.14E-09 |
| Rad52     | 0.650649 | 8.40E-10 | 1.19E-09 |
| Rnf185    | 0.427063 | 8.55E-10 | 1.21E-09 |
| Ttc37     | 0.408984 | 8.75E-10 | 1.23E-09 |
| Gm43413   | 1.369546 | 9.00E-10 | 1.27E-09 |
| Thoc7     | 0.210571 | 9.39E-10 | 1.32E-09 |
| Olfr1124  | 1.584874 | 9.48E-10 | 1.34E-09 |
| Lmbrd2    | 0.385073 | 9.53E-10 | 1.34E-09 |
| Gm40466   | 1.137765 | 9.54E-10 | 1.34E-09 |
| Gm43768   | 1.182635 | 9.65E-10 | 1.36E-09 |
| Pced1a    | 0.87967  | 9.73E-10 | 1.37E-09 |
| Vps4a     | 0.313531 | 9.92E-10 | 1.40E-09 |
| Tmem120I  | 1.232089 | 9.92E-10 | 1.40E-09 |
| Ephx2     | 0.542183 | 9.99E-10 | 1.41E-09 |
| Septin1   | 0.59967  | 9.99E-10 | 1.41E-09 |
| Gm43860   | 1.80471  | 1.00E-09 | 1.41E-09 |
| B230319C  | 1.503436 | 1.02E-09 | 1.43E-09 |
| Gm48562   | 0.805378 | 1.03E-09 | 1.45E-09 |
| Gm42531   | 2.301449 | 1.05E-09 | 1.47E-09 |
| Coq4      | 0.687928 | 1.08E-09 | 1.52E-09 |
| Gm32699   | 1.342548 | 1.09E-09 | 1.53E-09 |
| Zbtb24    | 0.501297 | 1.13E-09 | 1.59E-09 |
| Foxj2     | 0.392447 | 1.14E-09 | 1.61E-09 |
| Nudcd2    | 0.395286 | 1.15E-09 | 1.61E-09 |
| Ngb       | 1.618045 | 1.16E-09 | 1.64E-09 |
| Eps15I1   | 0.398267 | 1.20E-09 | 1.69E-09 |
| Mmaa      | 0.567419 | 1.23E-09 | 1.72E-09 |
| Slc39a6   | 0.477929 | 1.23E-09 | 1.73E-09 |
| Polr3b    | 0.671729 | 1.27E-09 | 1.78E-09 |
| Trdmt1    | 0.6424   | 1.28E-09 | 1.80E-09 |
| Gm50455   | 1.126336 | 1.40E-09 | 1.97E-09 |
| Oaz3      | 2.130834 | 1.43E-09 | 2.01E-09 |

|          |          |          |          |
|----------|----------|----------|----------|
| Angel1   | 0.712422 | 1.44E-09 | 2.02E-09 |
| Dnajc2   | 0.364282 | 1.46E-09 | 2.04E-09 |
| Gm47772  | 2.393615 | 1.48E-09 | 2.08E-09 |
| Dnttip1  | 0.364033 | 1.49E-09 | 2.10E-09 |
| Spen     | 0.24044  | 1.50E-09 | 2.11E-09 |
| Coa6     | 0.382694 | 1.50E-09 | 2.11E-09 |
| Cox20b   | 1.810391 | 1.54E-09 | 2.16E-09 |
| Kctd18   | 0.510226 | 1.53E-09 | 2.15E-09 |
| Particl  | 0.584397 | 1.57E-09 | 2.20E-09 |
| Gm47826  | 1.120548 | 1.63E-09 | 2.28E-09 |
| Tbrg4    | 0.7243   | 1.64E-09 | 2.30E-09 |
| Uros     | 0.771146 | 1.66E-09 | 2.32E-09 |
| Fank1    | 1.970129 | 1.67E-09 | 2.34E-09 |
| Fam214a  | 0.495512 | 1.67E-09 | 2.34E-09 |
| Acy1     | 0.836679 | 1.67E-09 | 2.34E-09 |
| Tgfbr3l  | 1.386239 | 1.68E-09 | 2.36E-09 |
| Gm45051  | 0.642577 | 1.70E-09 | 2.38E-09 |
| Rfc3     | 0.541186 | 1.71E-09 | 2.39E-09 |
| Sec16a   | 0.354393 | 1.71E-09 | 2.39E-09 |
| Efcab7   | 0.919135 | 1.72E-09 | 2.40E-09 |
| Nkapl    | 0.717721 | 1.72E-09 | 2.41E-09 |
| Xxylt1   | 0.500233 | 1.74E-09 | 2.44E-09 |
| Arhgef33 | 1.268916 | 1.75E-09 | 2.45E-09 |
| Acot13   | 0.338116 | 1.77E-09 | 2.48E-09 |
| Gm37522  | 1.022602 | 1.78E-09 | 2.49E-09 |
| Pabpn1l  | 1.634456 | 1.79E-09 | 2.51E-09 |
| Cep63    | 0.398131 | 1.82E-09 | 2.54E-09 |
| Ogfod1   | 0.528197 | 1.85E-09 | 2.59E-09 |
| Mrps35   | 0.406748 | 1.94E-09 | 2.71E-09 |
| Nit2     | 0.518881 | 1.95E-09 | 2.73E-09 |
| Dhx37    | 0.878298 | 1.98E-09 | 2.77E-09 |
| Nup160   | 0.461886 | 2.00E-09 | 2.79E-09 |
| Wdr53    | 0.583115 | 2.02E-09 | 2.82E-09 |
| Gars     | 0.319693 | 2.02E-09 | 2.82E-09 |
| Gfm1     | 0.441616 | 2.04E-09 | 2.85E-09 |
| Gm38192  | 1.929283 | 2.05E-09 | 2.86E-09 |
| Gm29609  | 1.870004 | 2.08E-09 | 2.90E-09 |
| Lgr4     | 0.523782 | 2.10E-09 | 2.94E-09 |
| Gm48880  | 1.055255 | 2.12E-09 | 2.96E-09 |
| Uck1     | 0.532906 | 2.15E-09 | 3.00E-09 |
| Snrpc    | 0.256637 | 2.17E-09 | 3.03E-09 |
| Rab40c   | 0.480575 | 2.20E-09 | 3.07E-09 |
| Gm15696  | 1.303538 | 2.20E-09 | 3.08E-09 |
| Gm30698  | 1.856832 | 2.25E-09 | 3.14E-09 |
| Mfn2     | 0.336225 | 2.31E-09 | 3.23E-09 |
| Chd1l    | 0.534008 | 2.34E-09 | 3.26E-09 |
| Mdp1     | 0.335108 | 2.36E-09 | 3.28E-09 |

|           |          |          |          |
|-----------|----------|----------|----------|
| Haus2     | 0.44211  | 2.45E-09 | 3.41E-09 |
| Gm43773   | 1.436653 | 2.53E-09 | 3.53E-09 |
| Abca1     | 0.428205 | 2.59E-09 | 3.61E-09 |
| Macroh2a  | 0.193529 | 2.61E-09 | 3.64E-09 |
| Gm25517   | 2.777246 | 2.63E-09 | 3.67E-09 |
| Gm10069   | 1.68229  | 2.63E-09 | 3.67E-09 |
| Gm44862   | 1.952042 | 2.64E-09 | 3.67E-09 |
| Gm26964   | 1.366413 | 2.65E-09 | 3.69E-09 |
| Gm45853   | 1.247118 | 2.67E-09 | 3.71E-09 |
| Mcrip2    | 0.719658 | 2.71E-09 | 3.77E-09 |
| Hs6st2    | 2.151428 | 2.72E-09 | 3.78E-09 |
| Cenpm     | 1.638113 | 2.74E-09 | 3.82E-09 |
| Gm37248   | 2.223144 | 2.76E-09 | 3.84E-09 |
| Sfxn4     | 0.696822 | 2.79E-09 | 3.89E-09 |
| Ears2     | 1.083503 | 2.83E-09 | 3.93E-09 |
| Hira      | 0.472778 | 2.85E-09 | 3.97E-09 |
| Gm14239   | 1.127621 | 2.91E-09 | 4.05E-09 |
| Pcdhga1   | 1.456776 | 3.05E-09 | 4.24E-09 |
| Gm16075   | 2.009866 | 3.09E-09 | 4.29E-09 |
| Acad9     | 0.479309 | 3.13E-09 | 4.36E-09 |
| Ube3b     | 0.380287 | 3.14E-09 | 4.36E-09 |
| Tmem69    | 0.944412 | 3.16E-09 | 4.40E-09 |
| Mavs      | 0.545525 | 3.17E-09 | 4.41E-09 |
| Gm27030   | 1.710958 | 3.18E-09 | 4.42E-09 |
| Rab24     | 0.296841 | 3.22E-09 | 4.48E-09 |
| Gm17108   | 2.307725 | 3.30E-09 | 4.58E-09 |
| Star      | 1.133155 | 3.32E-09 | 4.61E-09 |
| Siah1b    | 0.831241 | 3.41E-09 | 4.74E-09 |
| Zfp65     | 0.651108 | 3.50E-09 | 4.86E-09 |
| Gm48501   | 1.499243 | 3.69E-09 | 5.13E-09 |
| Mrpl39    | 0.463796 | 3.74E-09 | 5.18E-09 |
| Fgf11     | 0.655019 | 3.76E-09 | 5.22E-09 |
| Taf1c     | 0.693577 | 3.79E-09 | 5.26E-09 |
| Gm23119   | 2.542041 | 3.80E-09 | 5.28E-09 |
| Gm8444    | 2.070677 | 3.97E-09 | 5.51E-09 |
| Eif1b     | 0.198781 | 4.01E-09 | 5.56E-09 |
| Gm10752   | 2.012586 | 4.14E-09 | 5.74E-09 |
| Exoc5     | 0.249417 | 4.14E-09 | 5.74E-09 |
| Mrps18a   | 0.306366 | 4.17E-09 | 5.77E-09 |
| Eif4enif1 | 0.334077 | 4.22E-09 | 5.85E-09 |
| Cdca4     | 0.625519 | 4.22E-09 | 5.84E-09 |
| Wdr3      | 0.500575 | 4.24E-09 | 5.87E-09 |
| Wdyhv1    | 0.607065 | 4.25E-09 | 5.89E-09 |
| Cops4     | 0.276145 | 4.28E-09 | 5.92E-09 |
| Gm9884    | 1.947428 | 4.29E-09 | 5.94E-09 |
| 4930403P  | 1.244324 | 4.34E-09 | 6.00E-09 |
| Zfp574    | 0.484535 | 4.34E-09 | 6.01E-09 |

|          |          |          |          |
|----------|----------|----------|----------|
| Gm47234  | 1.02806  | 4.38E-09 | 6.05E-09 |
| Tfip11   | 0.482968 | 4.64E-09 | 6.42E-09 |
| Cdk5rap1 | 0.622552 | 4.69E-09 | 6.49E-09 |
| Gm19427  | 1.981788 | 4.74E-09 | 6.55E-09 |
| Lrrc8e   | 2.085939 | 4.74E-09 | 6.56E-09 |
| Gm17494  | 0.960902 | 4.75E-09 | 6.57E-09 |
| Fam228a  | 1.617843 | 4.89E-09 | 6.75E-09 |
| Miga2    | 0.518118 | 4.89E-09 | 6.75E-09 |
| Shisa2   | 1.216363 | 4.92E-09 | 6.81E-09 |
| Alg12    | 0.674415 | 4.96E-09 | 6.85E-09 |
| Zfp811   | 1.323958 | 5.08E-09 | 7.02E-09 |
| Pde8a    | 0.241371 | 5.11E-09 | 7.05E-09 |
| Prmt6    | 0.611611 | 5.13E-09 | 7.09E-09 |
| Gm6030   | 2.079183 | 5.15E-09 | 7.12E-09 |
| Mbd1     | 0.333613 | 5.28E-09 | 7.30E-09 |
| Gm21992  | 1.399068 | 5.29E-09 | 7.30E-09 |
| Mcm3ap   | 0.438085 | 5.41E-09 | 7.47E-09 |
| Gm26779  | 1.808026 | 5.44E-09 | 7.52E-09 |
| Mef2b    | 1.467648 | 5.62E-09 | 7.76E-09 |
| Gm9392   | 1.568968 | 5.64E-09 | 7.79E-09 |
| Psmd14   | 0.324137 | 5.70E-09 | 7.86E-09 |
| Setdb2   | 0.709566 | 5.73E-09 | 7.90E-09 |
| Srp72    | 0.240043 | 5.84E-09 | 8.05E-09 |
| Ldb3     | 1.372634 | 6.03E-09 | 8.31E-09 |
| Gm48027  | 0.791617 | 6.05E-09 | 8.34E-09 |
| Gm37051  | 1.393068 | 6.05E-09 | 8.35E-09 |
| Aimp2    | 0.499127 | 6.08E-09 | 8.39E-09 |
| Ptov1    | 0.228577 | 6.19E-09 | 8.54E-09 |
| Acbd4    | 0.423529 | 6.21E-09 | 8.56E-09 |
| Ier3ip1  | 0.218224 | 6.23E-09 | 8.58E-09 |
| Pdpr     | 0.543377 | 6.22E-09 | 8.58E-09 |
| Gm11196  | 2.089806 | 6.26E-09 | 8.63E-09 |
| Atp5o-1  | 0.180426 | 6.35E-09 | 8.75E-09 |
| Grik5    | 0.594066 | 6.38E-09 | 8.79E-09 |
| Gm37702  | 2.109414 | 6.48E-09 | 8.93E-09 |
| Mettl26  | 0.304199 | 6.49E-09 | 8.94E-09 |
| Tiparp   | 0.37682  | 6.49E-09 | 8.94E-09 |
| Gm13031  | 1.917374 | 6.54E-09 | 9.01E-09 |
| Gtf2b    | 0.310378 | 6.68E-09 | 9.20E-09 |
| Gnrh1    | 1.591095 | 6.74E-09 | 9.29E-09 |
| Phb2     | 0.253101 | 6.78E-09 | 9.33E-09 |
| Gm44559  | 1.652491 | 6.79E-09 | 9.34E-09 |
| Tmem170  | 0.564363 | 6.83E-09 | 9.40E-09 |
| Gm37895  | 1.211979 | 6.87E-09 | 9.45E-09 |
| Scaf1    | 0.315143 | 6.87E-09 | 9.46E-09 |
| Gm50203  | 1.969933 | 6.92E-09 | 9.52E-09 |
| 5033403F | 2.217124 | 6.95E-09 | 9.56E-09 |

|          |          |          |          |
|----------|----------|----------|----------|
| 5830454E | 0.899089 | 7.06E-09 | 9.71E-09 |
| Tmsb15l  | 1.300643 | 7.16E-09 | 9.84E-09 |
| Gm29055  | 1.32034  | 7.21E-09 | 9.91E-09 |
| Ints3    | 0.424529 | 7.28E-09 | 1.00E-08 |
| Gm33378  | 1.366952 | 7.43E-09 | 1.02E-08 |
| Lin52    | 0.498389 | 7.50E-09 | 1.03E-08 |
| Gm10785  | 1.895324 | 7.52E-09 | 1.03E-08 |
| Bmp15    | 1.659512 | 7.53E-09 | 1.03E-08 |
| Zcchc2   | 0.473719 | 7.62E-09 | 1.05E-08 |
| Gm49494  | 1.582482 | 7.68E-09 | 1.05E-08 |
| Gstz1    | 0.566966 | 7.78E-09 | 1.07E-08 |
| Ak2      | 0.356714 | 7.81E-09 | 1.07E-08 |
| Vcp      | 0.172168 | 7.92E-09 | 1.09E-08 |
| Spa17    | 0.622911 | 8.12E-09 | 1.12E-08 |
| Tsnax    | 0.248141 | 8.15E-09 | 1.12E-08 |
| Gm26631  | 1.291333 | 8.35E-09 | 1.15E-08 |
| Exoc4    | 0.316834 | 8.52E-09 | 1.17E-08 |
| Map3k4   | 0.291694 | 8.68E-09 | 1.19E-08 |
| Gm34121  | 2.171583 | 8.84E-09 | 1.21E-08 |
| Snx8     | 0.687258 | 9.00E-09 | 1.23E-08 |
| Pcdhgb4  | 0.771536 | 9.12E-09 | 1.25E-08 |
| Zfp707   | 0.544825 | 9.53E-09 | 1.31E-08 |
| Mrm2     | 0.594022 | 9.69E-09 | 1.33E-08 |
| Gid8     | 0.351684 | 9.77E-09 | 1.34E-08 |
| Sdhc     | 0.237049 | 9.81E-09 | 1.35E-08 |
| Zscan30  | 1.561961 | 9.82E-09 | 1.35E-08 |
| Trap1    | 0.435641 | 1.04E-08 | 1.43E-08 |
| Ydjc     | 1.314293 | 1.06E-08 | 1.45E-08 |
| Fbxo25   | 0.443409 | 1.07E-08 | 1.46E-08 |
| Klhl32   | 1.188252 | 1.07E-08 | 1.46E-08 |
| Qars     | 0.378564 | 1.07E-08 | 1.46E-08 |
| Elk1     | 0.585408 | 1.08E-08 | 1.48E-08 |
| Cnnm2    | 0.494094 | 1.10E-08 | 1.50E-08 |
| Hdgfl2   | 0.32889  | 1.11E-08 | 1.52E-08 |
| 4933404O | 1.355874 | 1.12E-08 | 1.53E-08 |
| Ubxn6    | 0.263573 | 1.14E-08 | 1.55E-08 |
| Tcea1    | 0.231186 | 1.14E-08 | 1.56E-08 |
| Gmps     | 0.276519 | 1.17E-08 | 1.60E-08 |
| Eri2     | 0.849367 | 1.17E-08 | 1.60E-08 |
| Gm19236  | 2.514355 | 1.19E-08 | 1.63E-08 |
| Cox7b    | 0.171486 | 1.20E-08 | 1.64E-08 |
| Abraxas2 | 0.341598 | 1.20E-08 | 1.64E-08 |
| Prdm15   | 0.664158 | 1.21E-08 | 1.65E-08 |
| Zfp334   | 0.581763 | 1.24E-08 | 1.69E-08 |
| Sesn1    | 0.246861 | 1.25E-08 | 1.71E-08 |
| Gm47088  | 1.712663 | 1.25E-08 | 1.71E-08 |
| Zfp408   | 0.737579 | 1.25E-08 | 1.71E-08 |



|           |          |          |          |
|-----------|----------|----------|----------|
| Gm45378   | 1.617579 | 1.26E-08 | 1.72E-08 |
| Hykk      | 0.652697 | 1.26E-08 | 1.72E-08 |
| Mcts1     | 0.302856 | 1.31E-08 | 1.79E-08 |
| Atpaf1    | 0.416053 | 1.35E-08 | 1.84E-08 |
| Gm44675   | 1.660344 | 1.42E-08 | 1.94E-08 |
| Eef1akmt2 | 0.390887 | 1.43E-08 | 1.95E-08 |
| Ddx59     | 0.837366 | 1.45E-08 | 1.98E-08 |
| Washc1    | 0.43289  | 1.46E-08 | 1.99E-08 |
| Fam221a   | 1.142716 | 1.48E-08 | 2.02E-08 |
| Ppox      | 0.510085 | 1.53E-08 | 2.09E-08 |
| Gm48619   | 1.940748 | 1.57E-08 | 2.14E-08 |
| Sesn2     | 0.7567   | 1.57E-08 | 2.14E-08 |
| Gm42732   | 1.543529 | 1.57E-08 | 2.15E-08 |
| Slain1    | 0.824373 | 1.60E-08 | 2.18E-08 |
| Olfm1     | 0.468643 | 1.61E-08 | 2.20E-08 |
| Apool     | 0.443815 | 1.62E-08 | 2.20E-08 |
| Tm2d2     | 0.245415 | 1.65E-08 | 2.24E-08 |
| Scube3    | 1.968755 | 1.65E-08 | 2.25E-08 |
| A930036I1 | 1.889203 | 1.66E-08 | 2.26E-08 |
| Gm37262   | 1.497561 | 1.68E-08 | 2.29E-08 |
| Ccdc86    | 0.507117 | 1.71E-08 | 2.33E-08 |
| Gale      | 0.936022 | 1.75E-08 | 2.38E-08 |
| Nme7      | 0.654338 | 1.78E-08 | 2.42E-08 |
| 3110067C1 | 2.012835 | 1.79E-08 | 2.44E-08 |
| Cebpz     | 0.239322 | 1.80E-08 | 2.44E-08 |
| Zfp109    | 1.892764 | 1.83E-08 | 2.49E-08 |
| Fbxo17    | 0.859763 | 1.89E-08 | 2.57E-08 |
| Mphosph6  | 0.325776 | 1.92E-08 | 2.62E-08 |
| Dgat1     | 0.494131 | 1.95E-08 | 2.65E-08 |
| Gtf2h3    | 0.622272 | 1.95E-08 | 2.65E-08 |
| Gm42715   | 0.820668 | 1.98E-08 | 2.69E-08 |
| Bmyc      | 0.26928  | 1.99E-08 | 2.70E-08 |
| Lamtor5   | 0.194921 | 1.99E-08 | 2.71E-08 |
| Pcdhgb5   | 0.835276 | 2.00E-08 | 2.72E-08 |
| Clcn7     | 0.446276 | 2.01E-08 | 2.73E-08 |
| Gm47439   | 2.235086 | 2.02E-08 | 2.74E-08 |
| Ctu1      | 0.849921 | 2.07E-08 | 2.81E-08 |
| Tpgs1     | 0.331089 | 2.11E-08 | 2.86E-08 |
| Tfe3      | 0.373808 | 2.12E-08 | 2.88E-08 |
| Nlgn2     | 0.438501 | 2.13E-08 | 2.90E-08 |
| Fhad1     | 1.353653 | 2.14E-08 | 2.91E-08 |
| Spata5l1  | 0.717821 | 2.20E-08 | 2.99E-08 |
| Rusf1     | 0.64656  | 2.21E-08 | 3.00E-08 |
| Tut1      | 0.614291 | 2.28E-08 | 3.10E-08 |
| Ankrd52   | 0.643535 | 2.29E-08 | 3.11E-08 |
| Rrp15     | 0.467179 | 2.30E-08 | 3.12E-08 |
| Cog4      | 0.380455 | 2.30E-08 | 3.12E-08 |

|           |          |          |          |
|-----------|----------|----------|----------|
| 6330549D  | 1.653201 | 2.30E-08 | 3.13E-08 |
| Tmem8b    | 0.57191  | 2.38E-08 | 3.22E-08 |
| Adat2     | 0.751484 | 2.38E-08 | 3.22E-08 |
| Rap1gds1  | 0.268608 | 2.39E-08 | 3.24E-08 |
| C78859    | 1.659723 | 2.41E-08 | 3.26E-08 |
| Stk19     | 0.378644 | 2.43E-08 | 3.29E-08 |
| Gm48139   | 0.487858 | 2.44E-08 | 3.31E-08 |
| Gm16552   | 1.638084 | 2.51E-08 | 3.40E-08 |
| Gm37738   | 1.233476 | 2.52E-08 | 3.41E-08 |
| Gm15559   | 1.609778 | 2.54E-08 | 3.44E-08 |
| Gm38381   | 1.124293 | 2.57E-08 | 3.49E-08 |
| Zfp395    | 0.354154 | 2.60E-08 | 3.53E-08 |
| Gm43663   | 2.2285   | 2.63E-08 | 3.56E-08 |
| Mrps27    | 0.622082 | 2.63E-08 | 3.56E-08 |
| Iqcb1     | 0.435979 | 2.63E-08 | 3.57E-08 |
| Sgcb      | 0.410435 | 2.65E-08 | 3.58E-08 |
| Pcdhgc5   | 1.040336 | 2.65E-08 | 3.59E-08 |
| Mtmr4     | 0.445762 | 2.66E-08 | 3.60E-08 |
| Sqle      | 0.483895 | 2.68E-08 | 3.62E-08 |
| Mettl18   | 0.717572 | 2.70E-08 | 3.66E-08 |
| Btbd1     | 0.227249 | 2.82E-08 | 3.81E-08 |
| 1700112J1 | 1.690002 | 2.83E-08 | 3.83E-08 |
| B230303O  | 1.093267 | 2.84E-08 | 3.84E-08 |
| Gm3791    | 0.86961  | 2.85E-08 | 3.85E-08 |
| Lemd2     | 0.350459 | 2.95E-08 | 3.99E-08 |
| Gm8013    | 1.730363 | 3.02E-08 | 4.09E-08 |
| Gm10699   | 1.01262  | 3.08E-08 | 4.16E-08 |
| Gm37077   | 1.094581 | 3.09E-08 | 4.18E-08 |
| Ndufa5    | 0.163165 | 3.17E-08 | 4.29E-08 |
| Gm17655   | 1.025467 | 3.18E-08 | 4.30E-08 |
| Rnf169    | 0.356184 | 3.25E-08 | 4.39E-08 |
| Gm16536   | 0.448985 | 3.27E-08 | 4.41E-08 |
| Pym1      | 0.482657 | 3.30E-08 | 4.45E-08 |
| 1700124L1 | 1.304647 | 3.34E-08 | 4.51E-08 |
| Arid3a    | 0.518005 | 3.38E-08 | 4.56E-08 |
| Xntrpc    | 1.494484 | 3.43E-08 | 4.63E-08 |
| 2810032G  | 1.679278 | 3.43E-08 | 4.63E-08 |
| Atp6v1a   | 0.198635 | 3.51E-08 | 4.73E-08 |
| Slirp     | 0.231327 | 3.56E-08 | 4.80E-08 |
| Gm3365    | 1.561613 | 3.63E-08 | 4.89E-08 |
| Rad23a    | 0.260054 | 3.63E-08 | 4.90E-08 |
| Plxna2    | 0.212294 | 3.75E-08 | 5.06E-08 |
| Nit1      | 0.372069 | 3.85E-08 | 5.18E-08 |
| Tmem126l  | 0.400572 | 3.85E-08 | 5.19E-08 |
| Clns1a    | 0.315475 | 3.86E-08 | 5.20E-08 |
| Gm16401   | 2.11037  | 3.98E-08 | 5.36E-08 |
| Adprm     | 0.465206 | 4.01E-08 | 5.40E-08 |

|          |          |          |          |
|----------|----------|----------|----------|
| Rnf121   | 0.413906 | 4.05E-08 | 5.45E-08 |
| Gm27003  | 1.518339 | 4.09E-08 | 5.50E-08 |
| Tmod4    | 1.575183 | 4.09E-08 | 5.51E-08 |
| Cyp46a1  | 1.294303 | 4.16E-08 | 5.60E-08 |
| Gm48420  | 1.233327 | 4.18E-08 | 5.63E-08 |
| D330023K | 0.421562 | 4.27E-08 | 5.75E-08 |
| Fkbp3    | 0.185557 | 4.30E-08 | 5.78E-08 |
| Gm42869  | 0.941658 | 4.32E-08 | 5.82E-08 |
| Hcfc2    | 0.417097 | 4.44E-08 | 5.98E-08 |
| Atp9b    | 0.373776 | 4.49E-08 | 6.04E-08 |
| Pou5f2   | 0.775893 | 4.49E-08 | 6.04E-08 |
| Gm43593  | 0.956125 | 4.76E-08 | 6.39E-08 |
| Nkrf     | 0.735247 | 4.84E-08 | 6.51E-08 |
| Iqcc     | 0.517377 | 5.06E-08 | 6.81E-08 |
| 4930547M | 2.385158 | 5.09E-08 | 6.84E-08 |
| Gm45041  | 2.110934 | 5.10E-08 | 6.85E-08 |
| Mettl15  | 0.837914 | 5.10E-08 | 6.86E-08 |
| Nsl1     | 1.846452 | 5.29E-08 | 7.11E-08 |
| Ube2m    | 0.205163 | 5.30E-08 | 7.12E-08 |
| 4930526L | 2.73882  | 5.31E-08 | 7.14E-08 |
| Cd2bp2   | 0.363977 | 5.32E-08 | 7.15E-08 |
| 1110059G | 0.298276 | 5.35E-08 | 7.19E-08 |
| Cldn34c1 | 0.511384 | 5.42E-08 | 7.28E-08 |
| 9930024M | 0.692978 | 5.48E-08 | 7.36E-08 |
| Nipsnap2 | 0.314713 | 5.49E-08 | 7.38E-08 |
| Gm47198  | 1.650002 | 5.52E-08 | 7.41E-08 |
| Polrmt   | 0.620591 | 5.54E-08 | 7.43E-08 |
| Phaf1    | 0.468297 | 5.55E-08 | 7.45E-08 |
| Qser1    | 0.270023 | 5.67E-08 | 7.61E-08 |
| Soat1    | 0.428432 | 5.72E-08 | 7.68E-08 |
| Cdk5     | 0.409943 | 5.75E-08 | 7.72E-08 |
| Gm15697  | 1.579002 | 5.77E-08 | 7.73E-08 |
| Npl      | 0.763378 | 5.79E-08 | 7.76E-08 |
| Mss51    | 0.991152 | 5.79E-08 | 7.77E-08 |
| Gm9670   | 1.612041 | 5.81E-08 | 7.79E-08 |
| Trpt1    | 0.684986 | 5.82E-08 | 7.80E-08 |
| 2810428J | 1.143959 | 5.86E-08 | 7.86E-08 |
| Gm43403  | 2.10872  | 5.97E-08 | 8.00E-08 |
| Emc1     | 0.318743 | 6.02E-08 | 8.06E-08 |
| Rnaseh1  | 0.523538 | 6.04E-08 | 8.09E-08 |
| 4933406P | 1.505991 | 6.10E-08 | 8.17E-08 |
| Lca5l    | 0.942215 | 6.12E-08 | 8.20E-08 |
| Nubp1    | 0.511057 | 6.15E-08 | 8.23E-08 |
| 4930532G | 1.48514  | 6.28E-08 | 8.41E-08 |
| Gm9645   | 0.965215 | 6.47E-08 | 8.67E-08 |
| Ddias    | 1.774643 | 6.51E-08 | 8.71E-08 |
| Fem1a    | 0.379853 | 6.55E-08 | 8.77E-08 |

|            |          |          |          |
|------------|----------|----------|----------|
| Pex26      | 0.636018 | 6.55E-08 | 8.77E-08 |
| Gen1       | 2.129186 | 6.67E-08 | 8.93E-08 |
| Atg13      | 0.384063 | 6.68E-08 | 8.94E-08 |
| Traf2      | 0.553574 | 6.71E-08 | 8.98E-08 |
| Zfp414     | 0.491346 | 6.86E-08 | 9.18E-08 |
| Ncdn       | 0.478782 | 6.99E-08 | 9.35E-08 |
| Ccnf       | 1.641562 | 7.06E-08 | 9.45E-08 |
| Gm14541    | 1.907951 | 7.08E-08 | 9.47E-08 |
| H3c6       | 1.143866 | 7.34E-08 | 9.82E-08 |
| 2210406O   | 1.615535 | 7.37E-08 | 9.86E-08 |
| Taco1      | 0.838559 | 7.64E-08 | 1.02E-07 |
| Ccdc73     | 0.876507 | 7.70E-08 | 1.03E-07 |
| Rara       | 0.361273 | 7.72E-08 | 1.03E-07 |
| Plaat1     | 1.409839 | 7.73E-08 | 1.03E-07 |
| 1810055G   | 0.665256 | 7.75E-08 | 1.04E-07 |
| Sarnp      | 0.197193 | 7.77E-08 | 1.04E-07 |
| Gm27239    | 2.439867 | 7.88E-08 | 1.05E-07 |
| Tbc1d14    | 0.320428 | 8.16E-08 | 1.09E-07 |
| Gm47870    | 2.15637  | 8.17E-08 | 1.09E-07 |
| Ncmap      | 1.676917 | 8.32E-08 | 1.11E-07 |
| Leng1      | 0.383885 | 8.51E-08 | 1.14E-07 |
| Awat2      | 2.280479 | 8.82E-08 | 1.18E-07 |
| Nefh       | 0.778486 | 8.82E-08 | 1.18E-07 |
| Abcc5      | 0.303651 | 8.91E-08 | 1.19E-07 |
| Gm49783    | 0.956735 | 8.98E-08 | 1.20E-07 |
| Paqr3      | 0.870939 | 9.01E-08 | 1.20E-07 |
| Pnrc1      | 0.155426 | 9.05E-08 | 1.21E-07 |
| Gtf3c5     | 0.553698 | 9.10E-08 | 1.22E-07 |
| Fastkd1    | 0.564309 | 9.29E-08 | 1.24E-07 |
| Gm26873    | 1.201054 | 9.40E-08 | 1.25E-07 |
| Rad51d     | 0.551237 | 9.41E-08 | 1.26E-07 |
| Ppp1r35    | 0.332709 | 9.49E-08 | 1.27E-07 |
| Zfp729b    | 0.550655 | 9.56E-08 | 1.28E-07 |
| Zfp280c    | 0.528576 | 9.61E-08 | 1.28E-07 |
| Aspm       | 1.997232 | 9.79E-08 | 1.31E-07 |
| Cadm3      | 0.545523 | 9.79E-08 | 1.31E-07 |
| Stxbp2     | 0.666731 | 9.79E-08 | 1.31E-07 |
| Gm26590    | 1.747303 | 9.87E-08 | 1.32E-07 |
| 9430015G   | 0.745562 | 9.98E-08 | 1.33E-07 |
| Gm37868    | 1.730644 | 1.00E-07 | 1.34E-07 |
| Rbks       | 0.736037 | 1.01E-07 | 1.35E-07 |
| Spns1      | 0.401443 | 1.02E-07 | 1.36E-07 |
| Ncapg2     | 0.893404 | 1.02E-07 | 1.36E-07 |
| A130077B   | 2.060759 | 1.03E-07 | 1.37E-07 |
| Rbm22      | 0.266109 | 1.03E-07 | 1.37E-07 |
| Slc10a4-ps | 2.147119 | 1.03E-07 | 1.37E-07 |
| Gm47232    | 1.286171 | 1.04E-07 | 1.38E-07 |

|          |          |          |          |
|----------|----------|----------|----------|
| Ccdc136  | 0.377353 | 1.04E-07 | 1.39E-07 |
| Gm42549  | 0.968232 | 1.06E-07 | 1.41E-07 |
| Gm42729  | 1.315311 | 1.07E-07 | 1.43E-07 |
| Gm50196  | 1.34907  | 1.09E-07 | 1.45E-07 |
| Zfp609   | 0.309998 | 1.09E-07 | 1.46E-07 |
| Pfkfb1   | 1.715868 | 1.11E-07 | 1.48E-07 |
| Nanos1   | 0.467851 | 1.13E-07 | 1.50E-07 |
| Usp38    | 0.398739 | 1.13E-07 | 1.50E-07 |
| Mark3    | 0.202384 | 1.13E-07 | 1.51E-07 |
| Gm50071  | 1.507465 | 1.15E-07 | 1.53E-07 |
| Gm19040  | 2.057505 | 1.16E-07 | 1.54E-07 |
| Nasp     | 0.313701 | 1.18E-07 | 1.57E-07 |
| Gm9517   | 1.774653 | 1.19E-07 | 1.58E-07 |
| Rab3gap2 | 0.35865  | 1.19E-07 | 1.59E-07 |
| Ormdl2   | 0.330333 | 1.22E-07 | 1.62E-07 |
| C9orf72  | 0.473236 | 1.31E-07 | 1.74E-07 |
| Cln8     | 0.437698 | 1.34E-07 | 1.78E-07 |
| Dnajc24  | 0.350507 | 1.34E-07 | 1.78E-07 |
| Gm17477  | 1.056885 | 1.35E-07 | 1.80E-07 |
| Gm14021  | 1.487181 | 1.36E-07 | 1.81E-07 |
| Arid1a   | 0.179806 | 1.36E-07 | 1.81E-07 |
| Map3k7   | 0.33226  | 1.37E-07 | 1.82E-07 |
| Tmed8    | 0.402423 | 1.38E-07 | 1.84E-07 |
| Gm42544  | 1.287581 | 1.43E-07 | 1.89E-07 |
| Dqx1     | 1.233676 | 1.44E-07 | 1.91E-07 |
| Gm17875  | 2.084893 | 1.44E-07 | 1.92E-07 |
| Smg7     | 0.263041 | 1.49E-07 | 1.97E-07 |
| Ppil6    | 0.593914 | 1.50E-07 | 1.98E-07 |
| Gdpdp1   | 0.731496 | 1.50E-07 | 1.99E-07 |
| Gm26670  | 1.413396 | 1.51E-07 | 2.00E-07 |
| Agk      | 0.415927 | 1.54E-07 | 2.05E-07 |
| Cdip1    | 0.256355 | 1.56E-07 | 2.07E-07 |
| Zc4h2    | 0.663911 | 1.60E-07 | 2.12E-07 |
| Car2     | 0.159475 | 1.64E-07 | 2.18E-07 |
| Slc39a13 | 0.384558 | 1.64E-07 | 2.17E-07 |
| Gm44571  | 2.135872 | 1.67E-07 | 2.21E-07 |
| Milr1    | 1.203901 | 1.67E-07 | 2.21E-07 |
| Brsk1    | 0.603574 | 1.67E-07 | 2.21E-07 |
| Gm10010  | 1.440085 | 1.67E-07 | 2.22E-07 |
| Hps5     | 0.428845 | 1.68E-07 | 2.23E-07 |
| 9530051G | 1.052361 | 1.69E-07 | 2.23E-07 |
| Zfp51    | 0.654274 | 1.70E-07 | 2.25E-07 |
| Cdca3    | 1.884973 | 1.71E-07 | 2.26E-07 |
| Hectd3   | 0.43851  | 1.70E-07 | 2.26E-07 |
| Gm44775  | 1.826167 | 1.75E-07 | 2.32E-07 |
| Gm48045  | 1.57241  | 1.76E-07 | 2.33E-07 |
| BC022960 | 1.364508 | 1.77E-07 | 2.35E-07 |

|           |          |          |          |
|-----------|----------|----------|----------|
| Scd3      | 1.52884  | 1.78E-07 | 2.36E-07 |
| Fn3krp    | 0.61972  | 1.79E-07 | 2.37E-07 |
| Hmbs      | 0.451851 | 1.80E-07 | 2.38E-07 |
| Coq6      | 0.543343 | 1.81E-07 | 2.40E-07 |
| Ino80dos  | 0.701391 | 1.84E-07 | 2.44E-07 |
| Nubp2     | 0.378242 | 1.86E-07 | 2.46E-07 |
| 2900035J1 | 0.770328 | 1.87E-07 | 2.48E-07 |
| Ciao2b    | 0.224485 | 1.88E-07 | 2.49E-07 |
| Sp3       | 0.190072 | 1.92E-07 | 2.54E-07 |
| Spdya     | 1.032005 | 1.92E-07 | 2.54E-07 |
| Copg2     | 0.346711 | 1.94E-07 | 2.57E-07 |
| Gm14412   | 1.436016 | 1.95E-07 | 2.58E-07 |
| Platr25   | 0.58755  | 1.98E-07 | 2.62E-07 |
| Rab6b     | 0.31583  | 1.99E-07 | 2.62E-07 |
| Gm44550   | 0.924215 | 2.01E-07 | 2.65E-07 |
| Masp2     | 1.667838 | 2.01E-07 | 2.66E-07 |
| Zfp93     | 0.928516 | 2.03E-07 | 2.67E-07 |
| Qpctl     | 0.5559   | 2.06E-07 | 2.72E-07 |
| Gabbr1    | 0.293994 | 2.08E-07 | 2.74E-07 |
| Cfap54    | 0.815779 | 2.08E-07 | 2.74E-07 |
| Cln5      | 0.357629 | 2.10E-07 | 2.78E-07 |
| Acadvl    | 0.271986 | 2.11E-07 | 2.78E-07 |
| Gm15956   | 1.552133 | 2.12E-07 | 2.80E-07 |
| A930040O  | 2.208365 | 2.16E-07 | 2.86E-07 |
| Gabpa     | 0.308875 | 2.20E-07 | 2.90E-07 |
| Gm19265   | 1.910657 | 2.20E-07 | 2.90E-07 |
| Clstn3    | 0.575875 | 2.20E-07 | 2.90E-07 |
| Pmf1      | 0.594543 | 2.21E-07 | 2.92E-07 |
| Patl1     | 0.359077 | 2.22E-07 | 2.92E-07 |
| Ap1m1     | 0.364209 | 2.22E-07 | 2.93E-07 |
| Gm38297   | 1.119415 | 2.22E-07 | 2.93E-07 |
| Zfp931    | 0.413426 | 2.24E-07 | 2.95E-07 |
| Clk2      | 0.36821  | 2.27E-07 | 2.99E-07 |
| AW554918  | 0.39056  | 2.28E-07 | 3.01E-07 |
| Gm29214   | 1.546164 | 2.30E-07 | 3.02E-07 |
| Fam124a   | 1.309412 | 2.32E-07 | 3.05E-07 |
| Zfp111    | 0.555261 | 2.36E-07 | 3.11E-07 |
| Rad54l2   | 0.335964 | 2.38E-07 | 3.13E-07 |
| 1700063JC | 1.484304 | 2.39E-07 | 3.14E-07 |
| Gm47113   | 1.602623 | 2.39E-07 | 3.15E-07 |
| Mtag2     | 1.42451  | 2.45E-07 | 3.23E-07 |
| Gm4419    | 0.915081 | 2.46E-07 | 3.23E-07 |
| Btf3l4    | 0.431005 | 2.46E-07 | 3.24E-07 |
| Prcc      | 0.403625 | 2.47E-07 | 3.25E-07 |
| Synpo2    | 0.281551 | 2.49E-07 | 3.27E-07 |
| Pbld2     | 1.71556  | 2.50E-07 | 3.29E-07 |
| Prmt8     | 1.189017 | 2.50E-07 | 3.29E-07 |

|          |          |          |          |
|----------|----------|----------|----------|
| Trmt2b   | 0.45233  | 2.50E-07 | 3.29E-07 |
| Sec23ip  | 0.324368 | 2.50E-07 | 3.29E-07 |
| Gm37331  | 1.272265 | 2.53E-07 | 3.32E-07 |
| Gm45477  | 0.757247 | 2.60E-07 | 3.41E-07 |
| 2010109A | 1.190831 | 2.62E-07 | 3.44E-07 |
| Prmt1    | 0.218111 | 2.64E-07 | 3.47E-07 |
| Jak1     | 0.187216 | 2.65E-07 | 3.48E-07 |
| Atg3     | 0.26813  | 2.66E-07 | 3.50E-07 |
| Mief2    | 0.683521 | 2.67E-07 | 3.51E-07 |
| Gm46136  | 2.151746 | 2.71E-07 | 3.56E-07 |
| Thumpd2  | 0.632507 | 2.77E-07 | 3.64E-07 |
| Fxr1     | 0.194585 | 2.86E-07 | 3.75E-07 |
| Tars     | 0.337644 | 2.86E-07 | 3.75E-07 |
| A830009L | 1.099113 | 2.91E-07 | 3.82E-07 |
| Gm47643  | 1.530579 | 2.93E-07 | 3.84E-07 |
| Zfpl1    | 0.341654 | 2.94E-07 | 3.86E-07 |
| Gm18564  | 2.224545 | 2.98E-07 | 3.91E-07 |
| Nup62    | 0.433892 | 3.00E-07 | 3.93E-07 |
| Gm15535  | 1.67786  | 3.10E-07 | 4.07E-07 |
| Riiad1   | 1.010307 | 3.12E-07 | 4.09E-07 |
| Gm15348  | 1.907621 | 3.12E-07 | 4.09E-07 |
| Gm14251  | 1.937294 | 3.14E-07 | 4.12E-07 |
| Gm45069  | 2.04437  | 3.17E-07 | 4.15E-07 |
| Gm48254  | 1.089137 | 3.20E-07 | 4.20E-07 |
| Gm44041  | 1.131837 | 3.23E-07 | 4.24E-07 |
| Dexi     | 0.3971   | 3.25E-07 | 4.25E-07 |
| Chrn2    | 1.158191 | 3.27E-07 | 4.28E-07 |
| Usf2     | 0.18748  | 3.28E-07 | 4.30E-07 |
| Prim1    | 0.614761 | 3.29E-07 | 4.30E-07 |
| Dusp26   | 0.65862  | 3.30E-07 | 4.32E-07 |
| Gm31024  | 1.362272 | 3.34E-07 | 4.37E-07 |
| Unc50    | 0.211231 | 3.37E-07 | 4.42E-07 |
| Vps26b   | 0.423553 | 3.40E-07 | 4.45E-07 |
| Dnajc16  | 0.489009 | 3.42E-07 | 4.48E-07 |
| Arm3     | 0.502194 | 3.46E-07 | 4.53E-07 |
| Urm1     | 0.343953 | 3.52E-07 | 4.61E-07 |
| Gm37510  | 0.991674 | 3.52E-07 | 4.61E-07 |
| Aebp2    | 0.241922 | 3.53E-07 | 4.61E-07 |
| Sac3d1   | 0.470097 | 3.57E-07 | 4.67E-07 |
| Gm42842  | 1.751686 | 3.60E-07 | 4.70E-07 |
| Gm15265  | 1.396459 | 3.64E-07 | 4.76E-07 |
| Gm43662  | 1.626765 | 3.68E-07 | 4.81E-07 |
| Smndc1   | 0.247141 | 3.69E-07 | 4.82E-07 |
| Actr1a   | 0.245223 | 3.76E-07 | 4.91E-07 |
| Homez    | 0.566227 | 3.76E-07 | 4.91E-07 |
| Epha10   | 1.071576 | 3.84E-07 | 5.02E-07 |
| Adpgk    | 0.543054 | 3.84E-07 | 5.02E-07 |

|          |          |          |          |
|----------|----------|----------|----------|
| Cldn12   | 0.489929 | 3.84E-07 | 5.02E-07 |
| Lrrfip2  | 0.276173 | 3.86E-07 | 5.05E-07 |
| Gm29994  | 1.514947 | 3.89E-07 | 5.08E-07 |
| Gm15965  | 1.88561  | 3.97E-07 | 5.19E-07 |
| Gm37612  | 1.258336 | 4.02E-07 | 5.25E-07 |
| Gm49915  | 1.446742 | 4.05E-07 | 5.29E-07 |
| Dok3     | 0.995475 | 4.05E-07 | 5.29E-07 |
| Prr22    | 1.82278  | 4.07E-07 | 5.32E-07 |
| Yars     | 0.411018 | 4.08E-07 | 5.33E-07 |
| Cpne9    | 1.544529 | 4.09E-07 | 5.34E-07 |
| Dennd1b  | 0.297351 | 4.18E-07 | 5.46E-07 |
| Vamp1    | 0.535945 | 4.21E-07 | 5.50E-07 |
| Arhgap12 | 0.293965 | 4.25E-07 | 5.54E-07 |
| Cc2d1a   | 0.50406  | 4.25E-07 | 5.55E-07 |
| Kctd13   | 0.49864  | 4.27E-07 | 5.57E-07 |
| Slc5a6   | 0.623827 | 4.30E-07 | 5.61E-07 |
| Edem3    | 0.342307 | 4.36E-07 | 5.69E-07 |
| Uggt1    | 0.296627 | 4.47E-07 | 5.83E-07 |
| Gm37509  | 1.0807   | 4.48E-07 | 5.85E-07 |
| Yipf3    | 0.247369 | 4.57E-07 | 5.95E-07 |
| Usp45    | 0.410523 | 4.58E-07 | 5.97E-07 |
| Dcp2     | 0.330818 | 4.65E-07 | 6.06E-07 |
| Sprtn    | 0.446446 | 4.66E-07 | 6.07E-07 |
| Exosc7   | 0.284235 | 4.67E-07 | 6.09E-07 |
| Gm37602  | 1.114625 | 4.70E-07 | 6.13E-07 |
| Vars2    | 0.628873 | 4.72E-07 | 6.15E-07 |
| Cybrd1   | 1.668858 | 4.75E-07 | 6.19E-07 |
| Lrriq3   | 1.512358 | 4.77E-07 | 6.22E-07 |
| Gm43625  | 1.393185 | 4.81E-07 | 6.26E-07 |
| Cog3     | 0.427152 | 4.81E-07 | 6.26E-07 |
| Rnls     | 1.435467 | 4.95E-07 | 6.44E-07 |
| Fam71f2  | 1.739881 | 4.96E-07 | 6.46E-07 |
| Zfp459   | 1.602093 | 4.99E-07 | 6.49E-07 |
| Fbf1     | 0.463883 | 5.02E-07 | 6.54E-07 |
| Stx5a    | 0.241507 | 5.05E-07 | 6.57E-07 |
| Gm14421  | 1.753294 | 5.06E-07 | 6.59E-07 |
| Ovca2    | 0.816706 | 5.13E-07 | 6.67E-07 |
| Polr2k   | 0.188565 | 5.15E-07 | 6.70E-07 |
| Gm42937  | 1.267124 | 5.36E-07 | 6.97E-07 |
| Atf6b    | 0.344884 | 5.37E-07 | 6.99E-07 |
| Gm42671  | 1.260497 | 5.42E-07 | 7.04E-07 |
| Kifc1    | 1.49543  | 5.56E-07 | 7.23E-07 |
| Setd6    | 0.534747 | 5.61E-07 | 7.29E-07 |
| Triap1   | 0.320689 | 5.63E-07 | 7.32E-07 |
| Cggbp1   | 0.179966 | 5.64E-07 | 7.33E-07 |
| Rwdd2b   | 0.901538 | 5.65E-07 | 7.35E-07 |
| Gm42466  | 0.957415 | 5.68E-07 | 7.39E-07 |



|           |          |          |          |
|-----------|----------|----------|----------|
| Epg5      | 0.53335  | 5.85E-07 | 7.60E-07 |
| Megf8     | 0.326181 | 5.87E-07 | 7.63E-07 |
| Fkbp4     | 0.179428 | 5.88E-07 | 7.64E-07 |
| D830035N  | 1.297799 | 5.92E-07 | 7.69E-07 |
| Gm42664   | 1.022757 | 5.94E-07 | 7.72E-07 |
| Gm37123   | 0.742924 | 5.96E-07 | 7.74E-07 |
| Gm9833    | 1.273271 | 5.96E-07 | 7.75E-07 |
| Ctdp1     | 0.483709 | 6.06E-07 | 7.87E-07 |
| 2410002F2 | 0.42411  | 6.23E-07 | 8.09E-07 |
| Slc38a7   | 0.582792 | 6.24E-07 | 8.10E-07 |
| Gm27017   | 1.846299 | 6.26E-07 | 8.13E-07 |
| Gps1      | 0.251052 | 6.30E-07 | 8.18E-07 |
| Zbtb1     | 0.337273 | 6.38E-07 | 8.28E-07 |
| Uchl4     | 1.476147 | 6.46E-07 | 8.38E-07 |
| 1700037H  | 0.503904 | 6.50E-07 | 8.43E-07 |
| Gm10037   | 1.166067 | 6.57E-07 | 8.53E-07 |
| Zfp41     | 0.70407  | 6.77E-07 | 8.77E-07 |
| C330018D  | 0.661013 | 6.79E-07 | 8.80E-07 |
| Hacd1     | 0.602128 | 6.79E-07 | 8.80E-07 |
| Edc3      | 0.438634 | 7.09E-07 | 9.18E-07 |
| D530018E  | 0.638739 | 7.45E-07 | 9.65E-07 |
| Gm4017    | 0.83047  | 7.57E-07 | 9.80E-07 |
| Kif13a    | 0.308439 | 7.63E-07 | 9.88E-07 |
| Gm19353   | 1.244051 | 7.66E-07 | 9.91E-07 |
| Abhd4     | 0.30691  | 7.78E-07 | 1.01E-06 |
| Gm42913   | 1.602256 | 7.81E-07 | 1.01E-06 |
| Gm37370   | 1.381457 | 7.82E-07 | 1.01E-06 |
| Gm49712   | 1.75948  | 7.86E-07 | 1.02E-06 |
| Gm9970    | 1.423619 | 7.90E-07 | 1.02E-06 |
| Dcps      | 0.343553 | 8.01E-07 | 1.04E-06 |
| Gm43088   | 0.73929  | 8.03E-07 | 1.04E-06 |
| Clasrp    | 0.409504 | 8.07E-07 | 1.04E-06 |
| Plk1      | 1.917743 | 8.13E-07 | 1.05E-06 |
| Pop4      | 0.3495   | 8.62E-07 | 1.11E-06 |
| Eif2s3x   | 0.261514 | 9.13E-07 | 1.18E-06 |
| E2f3      | 0.49087  | 9.25E-07 | 1.20E-06 |
| Sdhaf2    | 0.313844 | 9.28E-07 | 1.20E-06 |
| Tab1      | 0.466791 | 9.37E-07 | 1.21E-06 |
| Gm38082   | 0.7432   | 9.58E-07 | 1.24E-06 |
| Gm49309   | 1.656597 | 9.93E-07 | 1.28E-06 |
| Gm20544   | 1.504606 | 1.00E-06 | 1.29E-06 |
| Fkbp5     | 0.383835 | 1.02E-06 | 1.31E-06 |
| Hspbp1    | 0.444011 | 1.05E-06 | 1.36E-06 |
| Sbf2      | 0.199151 | 1.09E-06 | 1.41E-06 |
| Pdia4     | 0.247665 | 1.11E-06 | 1.43E-06 |
| Eef1aknm1 | 0.601115 | 1.11E-06 | 1.43E-06 |
| Krba1     | 0.395527 | 1.14E-06 | 1.47E-06 |

|          |          |          |          |
|----------|----------|----------|----------|
| Rmi1     | 0.398679 | 1.14E-06 | 1.47E-06 |
| 4930404N | 1.345073 | 1.15E-06 | 1.48E-06 |
| Gm10549  | 1.474084 | 1.16E-06 | 1.49E-06 |
| Cyb5d1   | 0.843998 | 1.16E-06 | 1.50E-06 |
| Ppp2r3d  | 0.367382 | 1.17E-06 | 1.50E-06 |
| Zfp598   | 0.300816 | 1.17E-06 | 1.50E-06 |
| 4933439C | 0.508751 | 1.19E-06 | 1.53E-06 |
| Tent2    | 0.323978 | 1.19E-06 | 1.53E-06 |
| Rxra     | 0.329028 | 1.21E-06 | 1.56E-06 |
| H3c7     | 1.5328   | 1.22E-06 | 1.58E-06 |
| Zfp235   | 0.522072 | 1.23E-06 | 1.58E-06 |
| Tnfsfm13 | 1.168387 | 1.24E-06 | 1.60E-06 |
| Gm48079  | 1.021628 | 1.25E-06 | 1.61E-06 |
| Sympk    | 0.281295 | 1.25E-06 | 1.62E-06 |
| Tmem241  | 0.617508 | 1.26E-06 | 1.62E-06 |
| Zrsr2    | 0.237197 | 1.27E-06 | 1.63E-06 |
| Slc18a2  | 1.418661 | 1.27E-06 | 1.63E-06 |
| Tmem268  | 0.815784 | 1.28E-06 | 1.65E-06 |
| Gm47155  | 1.236011 | 1.28E-06 | 1.65E-06 |
| Coa4     | 0.574493 | 1.33E-06 | 1.71E-06 |
| Gm43920  | 1.050904 | 1.33E-06 | 1.72E-06 |
| Cfp      | 0.804603 | 1.35E-06 | 1.74E-06 |
| Gm48742  | 1.527171 | 1.35E-06 | 1.74E-06 |
| Sdf2l1   | 0.534103 | 1.36E-06 | 1.75E-06 |
| Zfp954   | 0.599198 | 1.38E-06 | 1.77E-06 |
| Phf6     | 0.345925 | 1.38E-06 | 1.78E-06 |
| Ccne2    | 0.972097 | 1.39E-06 | 1.79E-06 |
| Gm25630  | 1.573201 | 1.42E-06 | 1.82E-06 |
| Cluh     | 0.399022 | 1.42E-06 | 1.83E-06 |
| Gm37986  | 1.31877  | 1.44E-06 | 1.85E-06 |
| Kdm4d    | 1.60331  | 1.46E-06 | 1.88E-06 |
| BC030343 | 1.632586 | 1.46E-06 | 1.88E-06 |
| Exosc1   | 0.306832 | 1.48E-06 | 1.90E-06 |
| Gm12094  | 1.502903 | 1.48E-06 | 1.90E-06 |
| Gm44676  | 1.437013 | 1.48E-06 | 1.91E-06 |
| Golga2   | 0.302474 | 1.51E-06 | 1.94E-06 |
| Gm37211  | 1.117614 | 1.53E-06 | 1.96E-06 |
| Gm39302  | 1.546621 | 1.58E-06 | 2.03E-06 |
| Prr14l   | 0.42952  | 1.60E-06 | 2.06E-06 |
| Gm45130  | 1.472709 | 1.62E-06 | 2.08E-06 |
| Gm13394  | 1.112439 | 1.62E-06 | 2.08E-06 |
| Dap3     | 0.315384 | 1.66E-06 | 2.14E-06 |
| Rgp1     | 0.421416 | 1.69E-06 | 2.17E-06 |
| Casp2    | 0.412879 | 1.70E-06 | 2.18E-06 |
| Ppp2r5b  | 0.399689 | 1.70E-06 | 2.18E-06 |
| Mfap1b   | 0.235799 | 1.74E-06 | 2.23E-06 |
| G6pc3    | 0.355665 | 1.75E-06 | 2.24E-06 |

|           |          |          |          |
|-----------|----------|----------|----------|
| Sytl1     | 1.763335 | 1.75E-06 | 2.25E-06 |
| Gm20463   | 1.345397 | 1.80E-06 | 2.31E-06 |
| Dusp19    | 0.585128 | 1.81E-06 | 2.33E-06 |
| Gm44647   | 1.618559 | 1.82E-06 | 2.33E-06 |
| B4galnt4  | 1.10507  | 1.85E-06 | 2.37E-06 |
| Gm48796   | 1.65275  | 1.85E-06 | 2.37E-06 |
| D630033A  | 0.573023 | 1.88E-06 | 2.41E-06 |
| Gm42725   | 1.37174  | 1.90E-06 | 2.43E-06 |
| Dhx38     | 0.308745 | 1.93E-06 | 2.48E-06 |
| C1galt1c1 | 0.318975 | 1.93E-06 | 2.48E-06 |
| Gm43681   | 0.811158 | 1.94E-06 | 2.49E-06 |
| Smarcc2   | 0.181139 | 1.97E-06 | 2.52E-06 |
| Arel1     | 0.401988 | 1.97E-06 | 2.52E-06 |
| Gm47594   | 1.407898 | 1.98E-06 | 2.54E-06 |
| Zbtb39    | 0.463455 | 1.98E-06 | 2.54E-06 |
| Rps19-ps6 | 1.179653 | 1.99E-06 | 2.55E-06 |
| Zfp568    | 0.540417 | 2.02E-06 | 2.59E-06 |
| Gm2027    | 1.512429 | 2.03E-06 | 2.59E-06 |
| B230322F  | 0.769349 | 2.08E-06 | 2.66E-06 |
| Fam83h    | 1.640998 | 2.15E-06 | 2.75E-06 |
| Sc5d      | 0.287687 | 2.16E-06 | 2.76E-06 |
| Gm48706   | 1.482782 | 2.17E-06 | 2.78E-06 |
| Srrd      | 0.442638 | 2.20E-06 | 2.81E-06 |
| Gm42735   | 0.694432 | 2.24E-06 | 2.87E-06 |
| Zpbp      | 1.647824 | 2.26E-06 | 2.89E-06 |
| Pus10     | 0.536188 | 2.29E-06 | 2.93E-06 |
| Coq8a     | 0.7128   | 2.30E-06 | 2.94E-06 |
| Gm15799   | 1.679566 | 2.30E-06 | 2.95E-06 |
| 5830444F  | 1.913843 | 2.32E-06 | 2.96E-06 |
| Ift52     | 0.355308 | 2.32E-06 | 2.97E-06 |
| Gm26803   | 1.092294 | 2.36E-06 | 3.02E-06 |
| Gm37716   | 1.358848 | 2.36E-06 | 3.02E-06 |
| D830025C  | 0.784852 | 2.36E-06 | 3.02E-06 |
| Hbs1l     | 0.319033 | 2.37E-06 | 3.03E-06 |
| Tbc1d10b  | 0.320913 | 2.42E-06 | 3.10E-06 |
| Pnpo      | 0.625144 | 2.44E-06 | 3.12E-06 |
| Gm7143    | 1.32154  | 2.45E-06 | 3.13E-06 |
| Nol12     | 0.366765 | 2.45E-06 | 3.13E-06 |
| Pms2      | 0.420295 | 2.46E-06 | 3.14E-06 |
| Erich1    | 0.320881 | 2.46E-06 | 3.14E-06 |
| Timm8a1   | 0.426991 | 2.48E-06 | 3.17E-06 |
| 4930524O  | 1.744894 | 2.52E-06 | 3.22E-06 |
| Dnase1l2  | 1.117973 | 2.53E-06 | 3.23E-06 |
| Def8      | 0.447514 | 2.54E-06 | 3.24E-06 |
| Rbm15b    | 0.339389 | 2.57E-06 | 3.28E-06 |
| Zdbf2     | 0.832927 | 2.62E-06 | 3.34E-06 |
| Drosha    | 0.298928 | 2.70E-06 | 3.44E-06 |

|           |          |          |          |
|-----------|----------|----------|----------|
| Gm10039   | 1.073837 | 2.72E-06 | 3.47E-06 |
| Lrrd1     | 1.456783 | 2.78E-06 | 3.54E-06 |
| Fv1       | 1.403012 | 2.84E-06 | 3.62E-06 |
| Adck2     | 0.578584 | 2.86E-06 | 3.65E-06 |
| C130060C1 | 1.674656 | 2.88E-06 | 3.67E-06 |
| Gm27029   | 1.253596 | 2.92E-06 | 3.72E-06 |
| 2810455O  | 1.19086  | 2.98E-06 | 3.80E-06 |
| Gm49413   | 1.075133 | 2.99E-06 | 3.81E-06 |
| Gm45137   | 0.956451 | 3.01E-06 | 3.83E-06 |
| Tarbp1    | 0.60744  | 3.04E-06 | 3.87E-06 |
| Cars2     | 0.40376  | 3.09E-06 | 3.93E-06 |
| Tada3     | 0.314862 | 3.12E-06 | 3.98E-06 |
| Gtpbp6    | 0.35188  | 3.15E-06 | 4.01E-06 |
| Zbed5     | 1.070517 | 3.16E-06 | 4.02E-06 |
| Mfsd13a   | 0.617939 | 3.17E-06 | 4.04E-06 |
| Gm6916    | 1.797728 | 3.24E-06 | 4.12E-06 |
| Cdadcl    | 0.286825 | 3.27E-06 | 4.16E-06 |
| Hs6st1    | 0.49004  | 3.32E-06 | 4.22E-06 |
| Tysnd1    | 0.416527 | 3.34E-06 | 4.25E-06 |
| Med27     | 0.414515 | 3.39E-06 | 4.32E-06 |
| Cbr4      | 0.489305 | 3.45E-06 | 4.38E-06 |
| Atm       | 0.383148 | 3.50E-06 | 4.45E-06 |
| Rnf168    | 0.260617 | 3.50E-06 | 4.46E-06 |
| Hmga1b    | 0.636977 | 3.60E-06 | 4.57E-06 |
| Rsph3a    | 0.909189 | 3.62E-06 | 4.61E-06 |
| Pcdha11   | 1.870024 | 3.69E-06 | 4.69E-06 |
| Lrrc61    | 0.553091 | 3.76E-06 | 4.77E-06 |
| Trmo      | 0.815999 | 3.76E-06 | 4.77E-06 |
| Morn4     | 0.61001  | 3.79E-06 | 4.82E-06 |
| Gm10516   | 1.166965 | 3.81E-06 | 4.84E-06 |
| Carm1     | 0.364075 | 3.87E-06 | 4.92E-06 |
| Gm44958   | 1.421645 | 3.98E-06 | 5.05E-06 |
| Ankrd31   | 1.688617 | 3.98E-06 | 5.06E-06 |
| Gpn2      | 0.498783 | 3.99E-06 | 5.06E-06 |
| U1-34     | 1.6175   | 4.01E-06 | 5.09E-06 |
| Pomk      | 0.589341 | 4.03E-06 | 5.11E-06 |
| Pcdhga11  | 1.029513 | 4.04E-06 | 5.13E-06 |
| Gm42783   | 0.704357 | 4.10E-06 | 5.20E-06 |
| Gm37588   | 1.936848 | 4.13E-06 | 5.24E-06 |
| Cnot8     | 0.271385 | 4.15E-06 | 5.26E-06 |
| Cep70     | 0.400122 | 4.15E-06 | 5.26E-06 |
| Fgfbp3    | 0.402598 | 4.15E-06 | 5.26E-06 |
| Exoc8     | 0.430468 | 4.16E-06 | 5.27E-06 |
| Stoml2    | 0.250977 | 4.20E-06 | 5.33E-06 |
| Cenpu     | 1.220076 | 4.24E-06 | 5.37E-06 |
| Tmem87b   | 0.235712 | 4.25E-06 | 5.39E-06 |
| Gm18029   | 1.268178 | 4.28E-06 | 5.42E-06 |

|          |          |          |          |
|----------|----------|----------|----------|
| Gm48442  | 1.341461 | 4.35E-06 | 5.52E-06 |
| Nhp2     | 0.300338 | 4.37E-06 | 5.53E-06 |
| Gm44646  | 1.113267 | 4.40E-06 | 5.57E-06 |
| Cblb     | 0.424692 | 4.40E-06 | 5.58E-06 |
| Gm38344  | 1.334556 | 4.47E-06 | 5.66E-06 |
| Jmjd8    | 0.369473 | 4.52E-06 | 5.72E-06 |
| Dnajc30  | 0.312459 | 4.54E-06 | 5.75E-06 |
| Gm17227  | 1.533672 | 4.61E-06 | 5.84E-06 |
| Polr2c   | 0.194312 | 4.66E-06 | 5.90E-06 |
| Gm20627  | 1.300453 | 4.72E-06 | 5.97E-06 |
| Isca2    | 0.254406 | 4.75E-06 | 6.02E-06 |
| Gm42798  | 0.790194 | 4.77E-06 | 6.03E-06 |
| Gm9727   | 1.439335 | 4.77E-06 | 6.04E-06 |
| Zbtb17   | 0.440301 | 4.78E-06 | 6.04E-06 |
| Zfp777   | 0.380794 | 4.78E-06 | 6.05E-06 |
| 1700109H | 0.797503 | 4.84E-06 | 6.13E-06 |
| Gm42876  | 1.349696 | 4.87E-06 | 6.16E-06 |
| Gm43547  | 1.273444 | 4.90E-06 | 6.20E-06 |
| Ubxn8    | 0.403566 | 4.95E-06 | 6.26E-06 |
| Gm43679  | 0.891941 | 4.98E-06 | 6.29E-06 |
| Gtpbp10  | 0.451641 | 5.01E-06 | 6.33E-06 |
| Cinp     | 0.357746 | 5.11E-06 | 6.46E-06 |
| Pcdhgb8  | 1.532082 | 5.13E-06 | 6.49E-06 |
| Dctn3    | 0.173293 | 5.15E-06 | 6.51E-06 |
| Ap4b1    | 0.551729 | 5.16E-06 | 6.52E-06 |
| Esrra    | 0.384567 | 5.16E-06 | 6.52E-06 |
| Pfdn1    | 0.165483 | 5.21E-06 | 6.58E-06 |
| Rbx1-ps  | 1.709478 | 5.23E-06 | 6.61E-06 |
| 4930578N | 1.558537 | 5.26E-06 | 6.65E-06 |
| Kctd5    | 0.393972 | 5.34E-06 | 6.74E-06 |
| E030042O | 1.665447 | 5.36E-06 | 6.77E-06 |
| 8430432A | 1.183122 | 5.40E-06 | 6.82E-06 |
| Zgpat    | 0.431904 | 5.42E-06 | 6.84E-06 |
| Zfp74    | 0.369514 | 5.46E-06 | 6.89E-06 |
| Dync1h1  | 0.143223 | 5.48E-06 | 6.91E-06 |
| Gm10800  | 1.617502 | 5.49E-06 | 6.93E-06 |
| Psmf1    | 0.33976  | 5.57E-06 | 7.03E-06 |
| Dtwd2    | 0.6692   | 5.57E-06 | 7.03E-06 |
| Fbxo22   | 0.246414 | 5.66E-06 | 7.14E-06 |
| Gm48314  | 1.049272 | 5.72E-06 | 7.22E-06 |
| Cdc42bpg | 0.600671 | 5.75E-06 | 7.25E-06 |
| BC055324 | 1.119551 | 5.79E-06 | 7.30E-06 |
| Gm48887  | 0.700015 | 5.82E-06 | 7.34E-06 |
| Anapc1   | 0.225534 | 5.90E-06 | 7.44E-06 |
| Gm38223  | 1.48444  | 6.01E-06 | 7.58E-06 |
| 9330102E | 1.240211 | 6.01E-06 | 7.58E-06 |
| Gm14023  | 1.261813 | 6.06E-06 | 7.64E-06 |

|          |          |          |          |
|----------|----------|----------|----------|
| Malt1    | 0.293088 | 6.07E-06 | 7.65E-06 |
| Tsen54   | 0.522794 | 6.14E-06 | 7.73E-06 |
| Gm47496  | 1.363109 | 6.16E-06 | 7.76E-06 |
| Gm5844   | 1.422638 | 6.18E-06 | 7.79E-06 |
| Gm37621  | 0.650773 | 6.18E-06 | 7.79E-06 |
| 4931414P | 0.789953 | 6.30E-06 | 7.94E-06 |
| Cited4   | 0.503619 | 6.34E-06 | 7.98E-06 |
| Zpr1     | 0.31969  | 6.40E-06 | 8.06E-06 |
| Larp4b   | 0.16796  | 6.51E-06 | 8.19E-06 |
| Syne1    | 0.145935 | 6.70E-06 | 8.43E-06 |
| Tmem234  | 0.147039 | 6.77E-06 | 8.52E-06 |
| Mthfr    | 0.449242 | 6.84E-06 | 8.61E-06 |
| Trmt61a  | 0.748273 | 6.89E-06 | 8.68E-06 |
| Med26    | 0.494531 | 6.90E-06 | 8.69E-06 |
| Mrpl22   | 0.336113 | 7.03E-06 | 8.85E-06 |
| B230362B | 1.04173  | 7.04E-06 | 8.85E-06 |
| Golph3l  | 0.341333 | 7.10E-06 | 8.92E-06 |
| Senp1    | 0.269539 | 7.23E-06 | 9.10E-06 |
| Gm37519  | 0.941535 | 7.31E-06 | 9.20E-06 |
| Ccdc12   | 0.161902 | 7.42E-06 | 9.34E-06 |
| Trim37   | 0.250339 | 7.62E-06 | 9.58E-06 |
| Thoc6    | 0.443441 | 7.71E-06 | 9.69E-06 |
| Gm10461  | 0.949844 | 7.76E-06 | 9.75E-06 |
| Dynlt1b  | 1.008691 | 7.91E-06 | 9.93E-06 |
| Etfdh    | 0.301473 | 7.92E-06 | 9.94E-06 |
| Psm12    | 0.184233 | 7.92E-06 | 9.95E-06 |
| Rab23    | 0.353457 | 7.96E-06 | 9.99E-06 |
| Prps1l3  | 0.480313 | 8.00E-06 | 1.01E-05 |
| Rps6k1   | 0.476771 | 8.02E-06 | 1.01E-05 |
| Bet1l    | 0.270107 | 8.05E-06 | 1.01E-05 |
| Gas2     | 0.666648 | 8.12E-06 | 1.02E-05 |
| Rnft1    | 0.342105 | 8.15E-06 | 1.02E-05 |
| Gpr19    | 0.586485 | 8.18E-06 | 1.03E-05 |
| Gm43750  | 1.433355 | 8.26E-06 | 1.04E-05 |
| Ahsa1    | 0.219105 | 8.34E-06 | 1.05E-05 |
| A630072N | 0.359864 | 8.34E-06 | 1.05E-05 |
| Eloc     | 0.153671 | 8.37E-06 | 1.05E-05 |
| Ube2n    | 0.166273 | 8.41E-06 | 1.05E-05 |
| 9630013D | 1.64583  | 8.54E-06 | 1.07E-05 |
| Celf5    | 0.681919 | 8.56E-06 | 1.07E-05 |
| Kiss1r   | 1.163929 | 8.76E-06 | 1.10E-05 |
| Dedd     | 0.31263  | 8.85E-06 | 1.11E-05 |
| Ubr4     | 0.193119 | 8.89E-06 | 1.11E-05 |
| Dhrs13os | 1.109098 | 9.06E-06 | 1.13E-05 |
| Nudt3    | 0.2073   | 9.09E-06 | 1.14E-05 |
| Gm14418  | 0.69841  | 9.17E-06 | 1.15E-05 |
| Med17    | 0.316408 | 9.27E-06 | 1.16E-05 |

|          |          |          |          |
|----------|----------|----------|----------|
| Uqcrb    | 0.107535 | 9.41E-06 | 1.18E-05 |
| Coq9     | 0.360348 | 9.41E-06 | 1.18E-05 |
| Gcn1     | 0.243585 | 9.42E-06 | 1.18E-05 |
| Gnl3l    | 0.239136 | 9.43E-06 | 1.18E-05 |
| Klhl8    | 0.458712 | 9.53E-06 | 1.19E-05 |
| Gm49683  | 1.293451 | 9.63E-06 | 1.20E-05 |
| AW011738 | 0.317681 | 9.63E-06 | 1.21E-05 |
| Cdk5r1   | 0.442979 | 9.68E-06 | 1.21E-05 |
| Gm37488  | 1.251962 | 9.74E-06 | 1.22E-05 |
| Pabpc1   | 0.131002 | 9.89E-06 | 1.24E-05 |
| Gm10767  | 1.161441 | 1.04E-05 | 1.30E-05 |
| Gm47802  | 1.087331 | 1.08E-05 | 1.35E-05 |
| Usp4     | 0.224958 | 1.08E-05 | 1.35E-05 |
| Suc1g1   | 0.182679 | 1.08E-05 | 1.35E-05 |
| Scyl2    | 0.349934 | 1.08E-05 | 1.36E-05 |
| Plxna3   | 0.94341  | 1.10E-05 | 1.37E-05 |
| Al413582 | 0.352021 | 1.12E-05 | 1.40E-05 |
| Pisd-ps2 | 1.067949 | 1.13E-05 | 1.41E-05 |
| Hdac5    | 0.213699 | 1.15E-05 | 1.44E-05 |
| Tatdn3   | 0.495433 | 1.18E-05 | 1.47E-05 |
| Siah2    | 0.430839 | 1.19E-05 | 1.48E-05 |
| Gm36930  | 1.291676 | 1.19E-05 | 1.48E-05 |
| Trmt1l   | 0.281363 | 1.19E-05 | 1.49E-05 |
| Nptn     | 0.155275 | 1.21E-05 | 1.51E-05 |
| Seh1l    | 0.276011 | 1.22E-05 | 1.52E-05 |
| Fam177a  | 0.847911 | 1.24E-05 | 1.54E-05 |
| Cox7a1   | 0.500099 | 1.26E-05 | 1.57E-05 |
| Zcwpw1   | 0.772216 | 1.26E-05 | 1.57E-05 |
| Chtf8    | 0.697194 | 1.26E-05 | 1.57E-05 |
| Nmd3     | 0.305967 | 1.27E-05 | 1.59E-05 |
| Paxip1   | 0.338462 | 1.30E-05 | 1.63E-05 |
| Map3k10  | 0.328713 | 1.32E-05 | 1.64E-05 |
| Appbp2   | 0.187412 | 1.34E-05 | 1.66E-05 |
| Smim10l2 | 1.430493 | 1.35E-05 | 1.69E-05 |
| Rabepk   | 0.350052 | 1.38E-05 | 1.72E-05 |
| Fam207a  | 0.336672 | 1.38E-05 | 1.72E-05 |
| Gm9442   | 1.078238 | 1.41E-05 | 1.76E-05 |
| Ccdc171  | 0.695849 | 1.49E-05 | 1.86E-05 |
| Abcb4    | 1.077283 | 1.50E-05 | 1.86E-05 |
| Pgm3     | 0.409822 | 1.51E-05 | 1.88E-05 |
| Gm12902  | 1.426108 | 1.54E-05 | 1.92E-05 |
| Foxk2    | 0.30625  | 1.57E-05 | 1.96E-05 |
| Gm38329  | 1.157129 | 1.57E-05 | 1.96E-05 |
| 9130002K | 0.803022 | 1.57E-05 | 1.96E-05 |
| Mapkapk5 | 0.633031 | 1.58E-05 | 1.96E-05 |
| Bet1     | 0.221617 | 1.60E-05 | 1.99E-05 |
| Ppp1ccb  | 1.520539 | 1.61E-05 | 2.00E-05 |

|          |          |          |          |
|----------|----------|----------|----------|
| Gm37080  | 0.73094  | 1.62E-05 | 2.02E-05 |
| Ell      | 0.353377 | 1.64E-05 | 2.04E-05 |
| Wdr18    | 0.324852 | 1.66E-05 | 2.06E-05 |
| Luc7l2   | 0.115215 | 1.69E-05 | 2.10E-05 |
| Gm44677  | 1.263091 | 1.71E-05 | 2.12E-05 |
| 4833412K | 0.595418 | 1.72E-05 | 2.13E-05 |
| Sf3a3    | 0.224734 | 1.74E-05 | 2.16E-05 |
| Gm43289  | 1.531419 | 1.74E-05 | 2.16E-05 |
| 1700102P | 1.146661 | 1.74E-05 | 2.17E-05 |
| Pigg     | 0.416331 | 1.76E-05 | 2.19E-05 |
| Coa5     | 0.30392  | 1.76E-05 | 2.19E-05 |
| Capza1   | 0.307478 | 1.76E-05 | 2.19E-05 |
| E130309D | 0.41391  | 1.76E-05 | 2.19E-05 |
| Atf1     | 0.245181 | 1.77E-05 | 2.19E-05 |
| Gm43061  | 0.902703 | 1.79E-05 | 2.23E-05 |
| Adra2a   | 1.067859 | 1.81E-05 | 2.25E-05 |
| Fndc3a   | 0.20715  | 1.82E-05 | 2.26E-05 |
| Zfat     | 0.592685 | 1.85E-05 | 2.29E-05 |
| Eif3e    | 0.137424 | 1.88E-05 | 2.33E-05 |
| Parp11   | 0.455954 | 1.88E-05 | 2.33E-05 |
| Larp1    | 0.207026 | 1.88E-05 | 2.33E-05 |
| Map2k6   | 0.484319 | 1.90E-05 | 2.36E-05 |
| Gm15859  | 1.232294 | 1.91E-05 | 2.36E-05 |
| Lipt2    | 0.63666  | 1.98E-05 | 2.45E-05 |
| Gm14399  | 0.757401 | 2.00E-05 | 2.47E-05 |
| Mybl2    | 1.675849 | 2.00E-05 | 2.48E-05 |
| Itpk1    | 0.361917 | 2.01E-05 | 2.49E-05 |
| Ptpdc1   | 0.463704 | 2.06E-05 | 2.55E-05 |
| Zfp772   | 0.695669 | 2.07E-05 | 2.56E-05 |
| Gcat     | 0.543326 | 2.08E-05 | 2.57E-05 |
| Mrpl10   | 0.329926 | 2.13E-05 | 2.64E-05 |
| Gm38250  | 1.432401 | 2.16E-05 | 2.68E-05 |
| Gm26533  | 0.997685 | 2.17E-05 | 2.69E-05 |
| Msh5     | 0.895929 | 2.19E-05 | 2.71E-05 |
| Oser1    | 0.26829  | 2.21E-05 | 2.74E-05 |
| Csnk2a1  | 0.16797  | 2.21E-05 | 2.74E-05 |
| Sowahc   | 0.41723  | 2.26E-05 | 2.79E-05 |
| Plekhn1  | 0.585615 | 2.28E-05 | 2.82E-05 |
| Spcs2    | 0.128182 | 2.30E-05 | 2.85E-05 |
| Pabpc4   | 0.48845  | 2.36E-05 | 2.92E-05 |
| Dcaf4    | 0.497854 | 2.39E-05 | 2.96E-05 |
| Harbi1   | 0.516837 | 2.42E-05 | 2.99E-05 |
| Ubox5    | 0.664399 | 2.50E-05 | 3.09E-05 |
| Prelid3b | 0.270934 | 2.52E-05 | 3.12E-05 |
| Wars2    | 0.522901 | 2.53E-05 | 3.12E-05 |
| MLx      | 0.290418 | 2.53E-05 | 3.13E-05 |
| Smarca4  | 0.164505 | 2.54E-05 | 3.13E-05 |



|           |          |          |          |
|-----------|----------|----------|----------|
| Gm10702   | 1.264598 | 2.56E-05 | 3.16E-05 |
| Rab26os   | 0.40745  | 2.59E-05 | 3.21E-05 |
| Coro7     | 0.364111 | 2.59E-05 | 3.21E-05 |
| Ccdc58    | 0.36432  | 2.59E-05 | 3.21E-05 |
| Dynll2    | 0.154891 | 2.63E-05 | 3.24E-05 |
| Gm47840   | 1.227998 | 2.64E-05 | 3.26E-05 |
| Pou5f1    | 1.017828 | 2.65E-05 | 3.27E-05 |
| Heatr1    | 0.51021  | 2.66E-05 | 3.28E-05 |
| Wdr92     | 0.420703 | 2.66E-05 | 3.29E-05 |
| Cdh18     | 1.481394 | 2.70E-05 | 3.33E-05 |
| Ndel1     | 0.237916 | 2.75E-05 | 3.40E-05 |
| Gm47112   | 1.40573  | 2.76E-05 | 3.41E-05 |
| Inpp5e    | 0.438857 | 2.79E-05 | 3.44E-05 |
| Gm38273   | 1.510852 | 2.85E-05 | 3.51E-05 |
| Cog8      | 0.275642 | 2.87E-05 | 3.54E-05 |
| H1f3      | 0.929078 | 2.89E-05 | 3.57E-05 |
| Nav3      | 0.583925 | 2.93E-05 | 3.61E-05 |
| Tex2      | 0.385894 | 2.94E-05 | 3.63E-05 |
| Cdkn2aip  | 0.236472 | 2.96E-05 | 3.65E-05 |
| Micu1     | 0.24163  | 2.99E-05 | 3.69E-05 |
| C030017G  | 1.578517 | 3.02E-05 | 3.72E-05 |
| Cd3eap    | 0.343063 | 3.03E-05 | 3.74E-05 |
| Uggt2     | 0.429386 | 3.04E-05 | 3.74E-05 |
| Mthfs     | 0.443661 | 3.04E-05 | 3.74E-05 |
| Nsun6     | 0.347356 | 3.09E-05 | 3.81E-05 |
| Stoml1    | 0.376892 | 3.24E-05 | 3.99E-05 |
| Aard      | 1.428155 | 3.24E-05 | 3.99E-05 |
| E130307A  | 0.459005 | 3.27E-05 | 4.03E-05 |
| 4930481A  | 0.496388 | 3.29E-05 | 4.05E-05 |
| Rnf26     | 0.428104 | 3.30E-05 | 4.07E-05 |
| Ubl5      | 0.10623  | 3.31E-05 | 4.07E-05 |
| Gm42595   | 0.665121 | 3.31E-05 | 4.08E-05 |
| Arrdc4    | 0.761543 | 3.31E-05 | 4.08E-05 |
| Gm33373   | 1.458198 | 3.39E-05 | 4.17E-05 |
| Dnai1     | 1.160319 | 3.39E-05 | 4.17E-05 |
| Gm15634   | 1.528082 | 3.41E-05 | 4.19E-05 |
| Tbc1d31   | 0.654242 | 3.46E-05 | 4.25E-05 |
| Gm47508   | 0.99373  | 3.46E-05 | 4.26E-05 |
| Hmgb1-rs1 | 0.946273 | 3.47E-05 | 4.27E-05 |
| Gm43480   | 1.420021 | 3.48E-05 | 4.28E-05 |
| Map3k14   | 0.527264 | 3.50E-05 | 4.30E-05 |
| Polr2i    | 0.174162 | 3.52E-05 | 4.33E-05 |
| Sgta      | 0.206931 | 3.59E-05 | 4.42E-05 |
| 2810004N  | 0.251894 | 3.60E-05 | 4.43E-05 |
| Gm15545   | 0.901174 | 3.62E-05 | 4.45E-05 |
| Yars2     | 0.478838 | 3.70E-05 | 4.55E-05 |
| Mknk1     | 0.412991 | 3.76E-05 | 4.62E-05 |

|           |          |          |          |
|-----------|----------|----------|----------|
| Megf9     | 0.254544 | 3.77E-05 | 4.64E-05 |
| Gm48735   | 1.154724 | 3.80E-05 | 4.67E-05 |
| Creb3     | 0.255345 | 3.84E-05 | 4.72E-05 |
| Zswim4    | 0.521115 | 3.90E-05 | 4.79E-05 |
| As3mt     | 0.235688 | 3.91E-05 | 4.80E-05 |
| Chordc1   | 0.196569 | 3.92E-05 | 4.81E-05 |
| Aurka     | 1.375044 | 3.92E-05 | 4.82E-05 |
| Gm46440   | 1.374921 | 4.07E-05 | 5.00E-05 |
| Unkl      | 0.320691 | 4.10E-05 | 5.04E-05 |
| Dxo       | 0.332927 | 4.11E-05 | 5.05E-05 |
| Gm37019   | 1.28446  | 4.30E-05 | 5.27E-05 |
| Tmem19    | 0.348371 | 4.31E-05 | 5.29E-05 |
| Gm49376   | 1.206464 | 4.33E-05 | 5.31E-05 |
| Ercc6     | 0.372006 | 4.36E-05 | 5.34E-05 |
| Fbxo5     | 0.582611 | 4.39E-05 | 5.38E-05 |
| Gm37017   | 1.414456 | 4.40E-05 | 5.40E-05 |
| Gm19967   | 0.687011 | 4.43E-05 | 5.43E-05 |
| Gm14286   | 1.055698 | 4.51E-05 | 5.53E-05 |
| Smarcd2   | 0.277522 | 4.52E-05 | 5.54E-05 |
| Mogat1    | 0.91049  | 4.55E-05 | 5.57E-05 |
| H4f16     | 0.835525 | 4.57E-05 | 5.60E-05 |
| Gm49077   | 1.28237  | 4.59E-05 | 5.63E-05 |
| Gm43766   | 0.821393 | 4.62E-05 | 5.66E-05 |
| Mtss1     | 0.169021 | 4.64E-05 | 5.68E-05 |
| 1110013H  | 0.914686 | 4.65E-05 | 5.70E-05 |
| Gm45447   | 1.126318 | 4.65E-05 | 5.70E-05 |
| Gm37409   | 1.309566 | 4.69E-05 | 5.75E-05 |
| 1700104B  | 1.726073 | 4.71E-05 | 5.77E-05 |
| Nup37     | 0.48446  | 4.75E-05 | 5.82E-05 |
| Chrna7    | 1.756875 | 4.78E-05 | 5.86E-05 |
| Mpzl3     | 1.166217 | 4.87E-05 | 5.97E-05 |
| Gm44835   | 0.92547  | 4.88E-05 | 5.97E-05 |
| D930030IC | 1.295057 | 4.92E-05 | 6.02E-05 |
| Gm11969   | 1.154748 | 4.94E-05 | 6.04E-05 |
| Gm43389   | 0.998571 | 4.94E-05 | 6.04E-05 |
| Fgf2      | 0.410622 | 5.00E-05 | 6.12E-05 |
| Gm26749   | 1.212669 | 5.01E-05 | 6.13E-05 |
| Glo1-ps   | 0.850104 | 5.04E-05 | 6.16E-05 |
| C1d       | 0.18886  | 5.10E-05 | 6.24E-05 |
| Pi4kb     | 0.340825 | 5.23E-05 | 6.40E-05 |
| Gm14325   | 0.727389 | 5.42E-05 | 6.63E-05 |
| Nphs1     | 1.59913  | 5.43E-05 | 6.64E-05 |
| Gm47588   | 1.53481  | 5.56E-05 | 6.79E-05 |
| Gm42548   | 0.679684 | 5.68E-05 | 6.94E-05 |
| Mrpl37    | 0.340897 | 5.71E-05 | 6.97E-05 |
| Pdpx      | 0.400791 | 5.71E-05 | 6.98E-05 |
| Cdk7      | 0.31091  | 5.72E-05 | 6.99E-05 |

|          |          |          |          |
|----------|----------|----------|----------|
| Prtg     | 0.744679 | 5.74E-05 | 7.02E-05 |
| Mfap3l   | 0.242226 | 5.84E-05 | 7.13E-05 |
| Max      | 0.153417 | 5.91E-05 | 7.21E-05 |
| Plgrkt   | 0.211503 | 5.92E-05 | 7.23E-05 |
| Slc6a20b | 1.00875  | 5.93E-05 | 7.24E-05 |
| Ptprcap  | 1.163649 | 5.94E-05 | 7.26E-05 |
| Cenpo    | 0.707886 | 5.95E-05 | 7.26E-05 |
| C530005A | 1.00069  | 6.02E-05 | 7.34E-05 |
| Dnajc27  | 0.367311 | 6.05E-05 | 7.38E-05 |
| Nudt15   | 0.854374 | 6.10E-05 | 7.45E-05 |
| Shmt2    | 0.37452  | 6.14E-05 | 7.49E-05 |
| Gm45890  | 1.11174  | 6.15E-05 | 7.50E-05 |
| Fbxl3    | 0.163362 | 6.26E-05 | 7.64E-05 |
| Gm37314  | 0.99884  | 6.30E-05 | 7.68E-05 |
| Phc3     | 0.169261 | 6.40E-05 | 7.80E-05 |
| Pik3r2   | 0.303514 | 6.45E-05 | 7.87E-05 |
| AA414768 | 1.039394 | 6.47E-05 | 7.88E-05 |
| Dctn5    | 0.260415 | 6.52E-05 | 7.95E-05 |
| Cdc40    | 0.185921 | 6.68E-05 | 8.15E-05 |
| Gm6483   | 1.249991 | 6.69E-05 | 8.16E-05 |
| Svil     | 0.176651 | 6.89E-05 | 8.39E-05 |
| Gm43737  | 0.731706 | 7.01E-05 | 8.54E-05 |
| Gm29093  | 0.851194 | 7.02E-05 | 8.55E-05 |
| Cdk10    | 0.329469 | 7.11E-05 | 8.66E-05 |
| Psmc5    | 0.150076 | 7.23E-05 | 8.81E-05 |
| Socs4    | 0.208379 | 7.31E-05 | 8.91E-05 |
| 3110083C | 1.072337 | 7.53E-05 | 9.16E-05 |
| Ift20    | 0.142606 | 7.56E-05 | 9.21E-05 |
| Dync1li2 | 0.170697 | 7.60E-05 | 9.24E-05 |
| Gm43340  | 1.073292 | 7.61E-05 | 9.26E-05 |
| Zkscan4  | 0.659361 | 7.61E-05 | 9.26E-05 |
| Prss36   | 0.67431  | 7.62E-05 | 9.26E-05 |
| Zmat2    | 0.157675 | 7.67E-05 | 9.33E-05 |
| Zbed6    | 0.211459 | 7.67E-05 | 9.33E-05 |
| Tmem120i | 0.428626 | 7.73E-05 | 9.40E-05 |
| Fam3a    | 0.257996 | 7.79E-05 | 9.47E-05 |
| Tomm6    | 0.351597 | 7.81E-05 | 9.50E-05 |
| Dnase2a  | 0.375408 | 7.85E-05 | 9.54E-05 |
| Fbxw5    | 0.294961 | 7.87E-05 | 9.57E-05 |
| Ddx47    | 0.258645 | 7.93E-05 | 9.63E-05 |
| Gm48334  | 0.826601 | 7.93E-05 | 9.64E-05 |
| Wdr46-ps | 1.336413 | 8.05E-05 | 9.78E-05 |
| 2510046G | 0.360214 | 8.27E-05 | 0.0001   |
| Acly     | 0.178323 | 8.37E-05 | 0.000102 |
| Gm30238  | 1.045269 | 8.40E-05 | 0.000102 |
| Gm12743  | 1.14985  | 8.66E-05 | 0.000105 |
| Cenpj    | 0.455039 | 8.69E-05 | 0.000106 |

|           |          |          |          |
|-----------|----------|----------|----------|
| Eloa      | 0.227853 | 8.71E-05 | 0.000106 |
| Slc35b4   | 0.375788 | 8.78E-05 | 0.000107 |
| Pank2     | 0.242539 | 8.99E-05 | 0.000109 |
| Gm20337   | 1.318562 | 9.06E-05 | 0.00011  |
| Saal1     | 0.402564 | 9.14E-05 | 0.000111 |
| Gpr35     | 1.501578 | 9.31E-05 | 0.000113 |
| Mrps23    | 0.261455 | 9.34E-05 | 0.000113 |
| Gm49442   | 1.293487 | 9.61E-05 | 0.000117 |
| Cpsf1     | 0.304668 | 9.61E-05 | 0.000117 |
| Gm44597   | 1.314777 | 9.62E-05 | 0.000117 |
| Gm49204   | 0.489358 | 9.65E-05 | 0.000117 |
| Eme2      | 0.747993 | 9.79E-05 | 0.000119 |
| Polr2g    | 0.169669 | 9.82E-05 | 0.000119 |
| Dnmt1     | 0.240678 | 9.95E-05 | 0.000121 |
| Gm16793   | 1.28868  | 0.0001   | 0.000121 |
| Xpo7      | 0.217505 | 0.000101 | 0.000122 |
| Dpp7      | 0.48088  | 0.000101 | 0.000123 |
| Phf2os1   | 1.180664 | 0.000102 | 0.000124 |
| BC055308  | 0.645577 | 0.000102 | 0.000124 |
| Mtrr      | 0.470749 | 0.000103 | 0.000125 |
| Cables2   | 0.258024 | 0.000105 | 0.000127 |
| 7SK-298   | 1.291055 | 0.000105 | 0.000127 |
| D630030B  | 0.737339 | 0.000106 | 0.000128 |
| Gm14853   | 0.801301 | 0.000106 | 0.000128 |
| Dhx34     | 0.525659 | 0.000106 | 0.000128 |
| Parp2     | 0.265917 | 0.000107 | 0.00013  |
| Naa50     | 0.182097 | 0.000111 | 0.000134 |
| Rubcn     | 0.29187  | 0.000114 | 0.000138 |
| Zfp133-ps | 1.179964 | 0.000115 | 0.000139 |
| Zfp219    | 0.271627 | 0.000116 | 0.00014  |
| Lrsam1    | 0.461753 | 0.000118 | 0.000143 |
| Zfp12     | 0.379527 | 0.000119 | 0.000144 |
| Psmd4     | 0.128952 | 0.000119 | 0.000144 |
| Crkl      | 0.224675 | 0.000122 | 0.000147 |
| Eef1akmt1 | 0.320344 | 0.000122 | 0.000147 |
| Pbdc1     | 0.243979 | 0.000122 | 0.000147 |
| Osbp      | 0.216508 | 0.000122 | 0.000147 |
| Fh1       | 0.244102 | 0.000123 | 0.000149 |
| 1700016J1 | 1.359563 | 0.000123 | 0.000149 |
| Ddx11     | 0.697557 | 0.000125 | 0.000151 |
| Cbx7      | 0.229105 | 0.000125 | 0.000152 |
| Lrrc23    | 0.862212 | 0.000129 | 0.000156 |
| Sh3gl1    | 0.202163 | 0.000131 | 0.000158 |
| Pwwp2b    | 0.256143 | 0.000136 | 0.000164 |
| Kdm3a     | 0.224365 | 0.000139 | 0.000168 |
| Gcfc2     | 0.393538 | 0.00014  | 0.000169 |
| Hells     | 0.554816 | 0.000141 | 0.00017  |

|          |          |          |          |
|----------|----------|----------|----------|
| Xab2     | 0.27581  | 0.000144 | 0.000173 |
| lfrd2    | 0.420802 | 0.000145 | 0.000175 |
| Zfp790   | 0.474197 | 0.000149 | 0.00018  |
| Zfp341   | 0.72984  | 0.000151 | 0.000182 |
| Tada2b   | 0.285884 | 0.000154 | 0.000185 |
| Gm42986  | 0.584683 | 0.000154 | 0.000185 |
| Mogs     | 0.369945 | 0.000154 | 0.000185 |
| Kctd9    | 0.386243 | 0.000157 | 0.00019  |
| Pan3     | 0.152037 | 0.000158 | 0.00019  |
| Gm10125  | 0.49948  | 0.000159 | 0.000192 |
| C430019N | 1.548511 | 0.00016  | 0.000192 |
| Gm43658  | 0.835058 | 0.000161 | 0.000193 |
| Vmn1r4   | 1.263071 | 0.000161 | 0.000193 |
| Dffb     | 0.467014 | 0.000162 | 0.000195 |
| Snrnp25  | 0.314378 | 0.000163 | 0.000196 |
| Gcsh     | 0.216237 | 0.000166 | 0.000199 |
| C1qbp    | 0.186897 | 0.000167 | 0.000202 |
| Xpo5     | 0.298305 | 0.000169 | 0.000203 |
| HnrnpII  | 0.205584 | 0.00017  | 0.000204 |
| Gm14227  | 0.911892 | 0.000172 | 0.000207 |
| Ptcd2    | 0.234556 | 0.000174 | 0.00021  |
| Wdr44    | 0.273208 | 0.000175 | 0.00021  |
| Tk2      | 0.331547 | 0.000183 | 0.00022  |
| Hectd2   | 0.639958 | 0.000183 | 0.000221 |
| Fig4     | 0.389382 | 0.000185 | 0.000222 |
| Catsper4 | 1.198226 | 0.000186 | 0.000224 |
| Tufm     | 0.287791 | 0.000188 | 0.000226 |
| D330041H | 0.499338 | 0.000188 | 0.000226 |
| Ssna1    | 0.189167 | 0.000191 | 0.000229 |
| Urb1     | 0.46057  | 0.000191 | 0.00023  |
| Gm21092  | 0.958289 | 0.000192 | 0.00023  |
| Dcbld1   | 0.379044 | 0.000192 | 0.000231 |
| Gosr1    | 0.255237 | 0.000193 | 0.000231 |
| Ect2     | 1.382307 | 0.000198 | 0.000238 |
| Uck2     | 0.483354 | 0.0002   | 0.00024  |
| Cdk19os  | 1.400223 | 0.000203 | 0.000244 |
| Zfr2     | 0.477003 | 0.000204 | 0.000245 |
| Tmem29   | 0.360332 | 0.000205 | 0.000247 |
| Pla2g6   | 0.441898 | 0.000211 | 0.000253 |
| Gm38220  | 0.929595 | 0.000213 | 0.000256 |
| Gm44321  | 0.66632  | 0.000215 | 0.000258 |
| Mettl8   | 0.492467 | 0.000215 | 0.000258 |
| Gm38286  | 1.157175 | 0.000218 | 0.000262 |
| Oat      | 0.153505 | 0.000221 | 0.000265 |
| 9130221H | 0.473705 | 0.000221 | 0.000265 |
| Nrip3    | 1.11805  | 0.000222 | 0.000266 |
| Dzank1   | 0.574925 | 0.000225 | 0.00027  |

|           |          |          |          |
|-----------|----------|----------|----------|
| Nup210    | 1.021159 | 0.000229 | 0.000274 |
| Lancl1    | 0.317141 | 0.000229 | 0.000275 |
| Ulk4      | 0.345863 | 0.000232 | 0.000278 |
| Phyhd1    | 1.058796 | 0.000235 | 0.000282 |
| Gm14335   | 0.95289  | 0.000239 | 0.000286 |
| Pin4      | 0.193098 | 0.000239 | 0.000287 |
| Ssh1      | 0.19503  | 0.000242 | 0.000289 |
| Acer3     | 0.330974 | 0.000243 | 0.000292 |
| Dvl1      | 0.23822  | 0.000247 | 0.000295 |
| Clcn2     | 0.657466 | 0.000247 | 0.000296 |
| Gm45719   | 0.99839  | 0.000252 | 0.000301 |
| Igsf3     | 0.617464 | 0.000252 | 0.000302 |
| C130036L2 | 0.481594 | 0.000252 | 0.000302 |
| Sgf29     | 0.299834 | 0.000254 | 0.000305 |
| Xrcc3     | 0.968896 | 0.000257 | 0.000307 |
| Zc3h11a   | 0.46394  | 0.000257 | 0.000308 |
| Mapk6     | 0.216373 | 0.000259 | 0.00031  |
| Slc37a2   | 1.197695 | 0.00026  | 0.000311 |
| Ankle2    | 0.225837 | 0.000262 | 0.000313 |
| Gm38355   | 1.26277  | 0.000263 | 0.000315 |
| Gorasp1   | 0.452115 | 0.000267 | 0.00032  |
| Lin9      | 0.51309  | 0.00027  | 0.000323 |
| Cutal     | 0.489283 | 0.000271 | 0.000324 |
| Abcd4     | 0.286167 | 0.000271 | 0.000324 |
| Nudt22    | 0.323649 | 0.000272 | 0.000325 |
| Gm43813   | 0.934604 | 0.000273 | 0.000326 |
| Tcp1      | 0.143053 | 0.000273 | 0.000327 |
| Cip2a     | 1.268142 | 0.000273 | 0.000327 |
| 5430431A  | 0.67235  | 0.000278 | 0.000332 |
| Tor1a     | 0.230626 | 0.000279 | 0.000333 |
| Rccd1     | 0.455644 | 0.000279 | 0.000334 |
| Gm48586   | 0.675136 | 0.000282 | 0.000337 |
| AV039307  | 1.102083 | 0.000284 | 0.000339 |
| Atp6v1d   | 0.153996 | 0.000286 | 0.000342 |
| Gpi-ps    | 1.15501  | 0.000287 | 0.000343 |
| Ccdc71    | 0.28504  | 0.000289 | 0.000345 |
| Gm44423   | 0.787422 | 0.00029  | 0.000347 |
| Pcdhga7   | 0.614098 | 0.000292 | 0.000349 |
| Gm44834   | 1.03766  | 0.000295 | 0.000352 |
| Golga5    | 0.252725 | 0.0003   | 0.000358 |
| Zfp809    | 0.350639 | 0.000302 | 0.00036  |
| Gm45762   | 0.610831 | 0.000305 | 0.000364 |
| Gm15760   | 0.775214 | 0.000309 | 0.000368 |
| Gm20501   | 1.255084 | 0.000311 | 0.000371 |
| Ubn1      | 0.143545 | 0.000311 | 0.000371 |
| Gm49064   | 1.127867 | 0.000312 | 0.000372 |
| Faap24    | 0.582155 | 0.000313 | 0.000374 |

|          |          |          |          |
|----------|----------|----------|----------|
| 4930447C | 0.361896 | 0.000317 | 0.000378 |
| 9330159F | 0.741018 | 0.00032  | 0.000382 |
| Zfp512   | 0.232329 | 0.000321 | 0.000382 |
| Zfp108   | 0.915981 | 0.000321 | 0.000383 |
| Perm1    | 1.440421 | 0.000323 | 0.000385 |
| Gfer     | 0.298547 | 0.000335 | 0.000399 |
| Agap3    | 0.225505 | 0.000336 | 0.0004   |
| Lrrc59   | 0.211979 | 0.00034  | 0.000405 |
| Gm4673   | 0.438968 | 0.000343 | 0.000409 |
| Gm37953  | 0.958981 | 0.000348 | 0.000414 |
| Alyref   | 0.15769  | 0.000353 | 0.00042  |
| Pinx1    | 0.351052 | 0.000353 | 0.000421 |
| Exosc9   | 0.263508 | 0.000362 | 0.000432 |
| Pum2     | 0.111119 | 0.000366 | 0.000436 |
| Ttc41    | 1.227857 | 0.00037  | 0.00044  |
| Mcm7     | 0.350124 | 0.00037  | 0.00044  |
| Nat8f4   | 1.077104 | 0.000371 | 0.000441 |
| Mrto4    | 0.25798  | 0.000381 | 0.000453 |
| Mcat     | 0.432744 | 0.000384 | 0.000457 |
| A930009A | 0.840754 | 0.000387 | 0.000461 |
| Gm38302  | 1.117147 | 0.00039  | 0.000464 |
| Ggcx     | 0.393997 | 0.000391 | 0.000465 |
| D930048N | 0.541864 | 0.000393 | 0.000468 |
| Pten     | 0.103936 | 0.000398 | 0.000473 |
| Nup214   | 0.222379 | 0.000409 | 0.000486 |
| Gpt      | 0.80761  | 0.00041  | 0.000488 |
| Tor2a    | 0.248833 | 0.000414 | 0.000492 |
| Unc79    | 0.725378 | 0.000415 | 0.000494 |
| Gm10524  | 0.464125 | 0.000416 | 0.000494 |
| Nars2    | 0.470089 | 0.000416 | 0.000494 |
| Stac3    | 0.904306 | 0.000419 | 0.000497 |
| 2010001A | 0.300539 | 0.000424 | 0.000504 |
| Eif4e2   | 0.203394 | 0.000426 | 0.000506 |
| 2510009E | 0.169894 | 0.000428 | 0.000509 |
| Twsg1    | 0.205451 | 0.00043  | 0.00051  |
| Mex3c    | 0.21856  | 0.000431 | 0.000512 |
| Zfp354b  | 0.637489 | 0.000431 | 0.000512 |
| Trappc14 | 0.437888 | 0.000435 | 0.000517 |
| Gm14295  | 0.472844 | 0.000436 | 0.000518 |
| Gm48914  | 1.145089 | 0.000438 | 0.00052  |
| Gm37011  | 1.06855  | 0.000439 | 0.000521 |
| Gm42576  | 0.451076 | 0.000441 | 0.000524 |
| Gm17530  | 1.132897 | 0.000446 | 0.000529 |
| Gm38336  | 0.906963 | 0.000448 | 0.000531 |
| Noc2l    | 0.26658  | 0.00045  | 0.000534 |
| Tgfbrap1 | 0.233349 | 0.000452 | 0.000536 |
| Gemin6   | 0.487002 | 0.000455 | 0.00054  |

|            |          |          |          |
|------------|----------|----------|----------|
| Setd1a     | 0.274805 | 0.000455 | 0.00054  |
| Zbtb34     | 0.339619 | 0.00046  | 0.000546 |
| Rmnd5a     | 0.152489 | 0.000463 | 0.000549 |
| Ptrh1      | 1.104945 | 0.000465 | 0.000551 |
| Gm45873    | 0.824013 | 0.000473 | 0.000561 |
| Pmm2       | 0.29867  | 0.000474 | 0.000562 |
| Rpl17-ps10 | 1.023819 | 0.00048  | 0.00057  |
| Gm527      | 0.596498 | 0.000482 | 0.000571 |
| Mipep      | 0.401652 | 0.000492 | 0.000583 |
| Pafah2     | 0.550422 | 0.000495 | 0.000587 |
| Ak1        | 0.405722 | 0.0005   | 0.000593 |
| Ppid       | 0.170264 | 0.0005   | 0.000593 |
| 1700113A   | 0.625591 | 0.000501 | 0.000593 |
| Gm12934    | 1.186327 | 0.000502 | 0.000595 |
| Clpb       | 0.266153 | 0.000505 | 0.000599 |
| Pex11g     | 0.577    | 0.000511 | 0.000605 |
| Gm37255    | 0.604864 | 0.000513 | 0.000607 |
| Zfp839     | 0.319262 | 0.000514 | 0.000609 |
| Cep152     | 0.521547 | 0.000516 | 0.00061  |
| Gm10136    | 0.608287 | 0.000534 | 0.000632 |
| Gm48986    | 1.057591 | 0.00055  | 0.000651 |
| Fut10      | 0.41902  | 0.000557 | 0.00066  |
| Xkrx       | 1.296215 | 0.000561 | 0.000663 |
| Tmem128    | 0.171728 | 0.000565 | 0.000668 |
| Figl1      | 1.111291 | 0.000567 | 0.000671 |
| Gm45809    | 0.590094 | 0.000568 | 0.000672 |
| Sec23b     | 0.22401  | 0.000569 | 0.000673 |
| Gm47558    | 0.979025 | 0.00057  | 0.000674 |
| Gm49201    | 0.956859 | 0.000574 | 0.000679 |
| 9530062Kl  | 1.007548 | 0.000578 | 0.000683 |
| 8430406P   | 1.052326 | 0.000578 | 0.000683 |
| Gm38198    | 1.017304 | 0.000592 | 0.0007   |
| Rpl10-ps6  | 0.866364 | 0.000609 | 0.00072  |
| Adam4      | 1.166308 | 0.000612 | 0.000722 |
| Gm20498    | 0.782753 | 0.000614 | 0.000725 |
| Kif4       | 0.881508 | 0.000619 | 0.000731 |
| Tmem177    | 0.58308  | 0.000619 | 0.000731 |
| Commd6     | 0.163136 | 0.000622 | 0.000735 |
| Gm12322    | 1.074634 | 0.000626 | 0.00074  |
| Gm43633    | 1.112111 | 0.000627 | 0.000741 |
| Pcdhgb7    | 0.813429 | 0.00063  | 0.000743 |
| Atl2       | 0.198875 | 0.000654 | 0.000772 |
| Tmem147    | 1.155121 | 0.000655 | 0.000773 |
| Tomm5      | 0.153695 | 0.00066  | 0.000778 |
| Ndufs8     | 0.14487  | 0.000668 | 0.000788 |
| Ssr2       | 0.148108 | 0.000681 | 0.000803 |
| Tbl3       | 0.319606 | 0.000681 | 0.000803 |



|          |          |          |          |
|----------|----------|----------|----------|
| 9530078K | 0.822168 | 0.000694 | 0.000819 |
| Ano8     | 0.46259  | 0.000704 | 0.000829 |
| Afg1l    | 0.409343 | 0.000709 | 0.000836 |
| Srd5a1   | 0.543605 | 0.000712 | 0.000838 |
| Gm44090  | 1.223621 | 0.000712 | 0.000838 |
| A330084C | 0.952064 | 0.000712 | 0.000839 |
| Mvb12a   | 0.19572  | 0.000715 | 0.000843 |
| Gm50013  | 0.952284 | 0.000719 | 0.000846 |
| Fbxo21   | 0.226228 | 0.000722 | 0.00085  |
| Polr1b   | 0.47795  | 0.000725 | 0.000853 |
| Ercc5    | 0.19465  | 0.00073  | 0.000859 |
| Psrc1    | 1.266725 | 0.000747 | 0.000879 |
| Zranb3   | 0.56449  | 0.000747 | 0.00088  |
| BC031181 | 0.11404  | 0.000749 | 0.000882 |
| Gm43799  | 0.899221 | 0.00076  | 0.000894 |
| Gm37297  | 0.470425 | 0.000768 | 0.000904 |
| Ran      | 0.104077 | 0.000769 | 0.000904 |
| Nhlrc3   | 0.315627 | 0.000769 | 0.000905 |
| Rcan1    | 0.248828 | 0.000773 | 0.000909 |
| Dus1l    | 0.283273 | 0.00078  | 0.000917 |
| Hax1     | 0.211153 | 0.000781 | 0.000918 |
| Pcsk7    | 0.242303 | 0.000783 | 0.000921 |
| Xrcc4    | 0.254343 | 0.000783 | 0.000921 |
| Cct2     | 0.123819 | 0.0008   | 0.00094  |
| Ctnnal1  | 0.351302 | 0.000804 | 0.000945 |
| Phtf1    | 0.27925  | 0.000809 | 0.000951 |
| S100pbp  | 0.238781 | 0.000815 | 0.000958 |
| Pex12    | 0.44239  | 0.000833 | 0.000979 |
| Wdr36    | 0.286857 | 0.00086  | 0.00101  |
| Aldh7a1  | 0.214095 | 0.00086  | 0.001011 |
| Txn14b   | 0.617712 | 0.000864 | 0.001015 |
| BC051142 | 0.759709 | 0.000865 | 0.001016 |
| ENSMUSG  | 1.10335  | 0.000866 | 0.001017 |
| Abtb1    | 0.280333 | 0.000887 | 0.001042 |
| Gm38248  | 0.851024 | 0.000919 | 0.001079 |
| Vhl      | 0.25597  | 0.000924 | 0.001084 |
| C230085N | 1.051718 | 0.00093  | 0.001091 |
| Gm43178  | 0.744388 | 0.000956 | 0.001122 |
| Pprc1    | 0.398132 | 0.000971 | 0.001139 |
| Utp20    | 0.353259 | 0.000977 | 0.001145 |
| Gm12251  | 0.944302 | 0.000986 | 0.001156 |
| Shpk     | 0.61494  | 0.000997 | 0.00117  |
| Stk38l   | 0.221306 | 0.001003 | 0.001176 |
| Pcdh19   | 0.463174 | 0.001009 | 0.001183 |
| Fzd10os  | 1.010982 | 0.001019 | 0.001194 |
| 1810009A | 0.460669 | 0.001029 | 0.001206 |
| Gm37880  | 0.838645 | 0.00103  | 0.001207 |

|          |          |          |          |
|----------|----------|----------|----------|
| Gm37864  | 1.026275 | 0.001042 | 0.001221 |
| Gdi1     | 0.144545 | 0.001043 | 0.001222 |
| Zfp592   | 0.200913 | 0.001043 | 0.001223 |
| Gm43263  | 1.175321 | 0.001056 | 0.001238 |
| Gm4356   | 0.533514 | 0.001063 | 0.001246 |
| Gm37960  | 0.554853 | 0.001078 | 0.001263 |
| Gm45328  | 1.209963 | 0.001083 | 0.001269 |
| Magoh    | 0.129017 | 0.001085 | 0.001271 |
| Ddx21    | 0.176083 | 0.001089 | 0.001276 |
| Ruvbl1   | 0.207334 | 0.001098 | 0.001286 |
| Actr5    | 0.3353   | 0.001118 | 0.001309 |
| Fuca2    | 0.251044 | 0.001128 | 0.00132  |
| Gm17344  | 1.063021 | 0.001139 | 0.001333 |
| Myo1g    | 1.102773 | 0.001141 | 0.001336 |
| Gm37289  | 0.777431 | 0.001158 | 0.001355 |
| Gm43665  | 0.903227 | 0.001181 | 0.001382 |
| Ints14   | 0.307786 | 0.001193 | 0.001395 |
| Maip1    | 0.225728 | 0.001196 | 0.001399 |
| Dolpp1   | 0.344292 | 0.001201 | 0.001405 |
| Asnsd1   | 0.264465 | 0.00121  | 0.001415 |
| Gm36262  | 0.895123 | 0.001213 | 0.001419 |
| Pdcd2    | 0.256606 | 0.001218 | 0.001424 |
| Zfp607a  | 0.477789 | 0.001232 | 0.001441 |
| Yeats2   | 0.221053 | 0.001253 | 0.001465 |
| Gm48673  | 0.743313 | 0.001276 | 0.001491 |
| A830082N | 0.373111 | 0.001288 | 0.001505 |
| Hdac2    | 0.158968 | 0.001304 | 0.001524 |
| Ndufb3   | 0.098264 | 0.001311 | 0.001532 |
| Fxr2     | 0.180323 | 0.001319 | 0.001541 |
| Crtc1    | 0.339171 | 0.001342 | 0.001568 |
| Ftsj3    | 0.289335 | 0.001369 | 0.001599 |
| Pradc1   | 0.228658 | 0.001377 | 0.001608 |
| Trappc2  | 0.214679 | 0.001423 | 0.001661 |
| Zcrb1    | 0.114424 | 0.001428 | 0.001667 |
| Gm15587  | 0.660298 | 0.001431 | 0.00167  |
| Gm43457  | 0.492356 | 0.001439 | 0.001679 |
| Gm16310  | 0.760492 | 0.001442 | 0.001683 |
| Bcl9     | 0.24356  | 0.00145  | 0.001692 |
| Hmces    | 0.301266 | 0.001465 | 0.001709 |
| Tmem192  | 0.228625 | 0.001478 | 0.001725 |
| Zfp384   | 0.287163 | 0.001482 | 0.001729 |
| Pcdhga6  | 0.482468 | 0.001484 | 0.001731 |
| Msh6     | 0.341212 | 0.001509 | 0.001759 |
| Tmem91   | 0.853896 | 0.00152  | 0.001772 |
| Gm9768   | 1.176984 | 0.001527 | 0.001781 |
| Ambra1   | 0.270989 | 0.001549 | 0.001806 |
| Eif4a1   | 0.100349 | 0.001563 | 0.001822 |

|          |          |          |          |
|----------|----------|----------|----------|
| Gm6612   | 0.610394 | 0.001571 | 0.001831 |
| Hnrnpa3  | 0.081007 | 0.001621 | 0.001889 |
| Pcdhga3  | 0.700202 | 0.001628 | 0.001897 |
| Ostm1    | 0.263573 | 0.001641 | 0.001911 |
| Setd5    | 0.115667 | 0.001651 | 0.001923 |
| Ttc33    | 0.184214 | 0.001662 | 0.001936 |
| Epn1     | 0.139448 | 0.001679 | 0.001956 |
| Ubac2    | 0.220074 | 0.001691 | 0.001968 |
| Slc1a5   | 0.387942 | 0.001693 | 0.00197  |
| 4933431K | 0.583731 | 0.001695 | 0.001973 |
| Adsl     | 0.260543 | 0.0017   | 0.001979 |
| Shc4     | 0.79586  | 0.001701 | 0.00198  |
| Ficd     | 0.334787 | 0.00175  | 0.002036 |
| Acaa1a   | 0.225438 | 0.00176  | 0.002048 |
| 4930466K | 0.460467 | 0.001791 | 0.002082 |
| Gm46447  | 1.164166 | 0.001799 | 0.002092 |
| 1810014B | 0.378773 | 0.0018   | 0.002092 |
| 1110035H | 0.405228 | 0.001804 | 0.002097 |
| Gm14634  | 0.956169 | 0.00182  | 0.002115 |
| Ppp6c    | 0.154878 | 0.001849 | 0.002149 |
| Prox2    | 0.63704  | 0.00186  | 0.002162 |
| Pex16    | 0.274411 | 0.00187  | 0.002173 |
| 2900002M | 0.953    | 0.001881 | 0.002185 |
| Gm44953  | 1.039161 | 0.001891 | 0.002197 |
| Fubp3    | 0.189795 | 0.001909 | 0.002217 |
| Bbx      | 0.136228 | 0.001922 | 0.002233 |
| Habp4    | 0.227588 | 0.001926 | 0.002237 |
| Gm43378  | 0.66677  | 0.001927 | 0.002237 |
| Rad9a    | 0.343576 | 0.001935 | 0.002247 |
| Lrrc28   | 0.381772 | 0.001956 | 0.002271 |
| Kif16b   | 0.270706 | 0.001962 | 0.002278 |
| Gm2238   | 0.568912 | 0.00199  | 0.00231  |
| Josd2    | 0.22429  | 0.001996 | 0.002316 |
| Mypop    | 0.321425 | 0.002028 | 0.002354 |
| 1500026H | 0.436812 | 0.00204  | 0.002367 |
| AY036118 | 0.510009 | 0.002041 | 0.002367 |
| Gm5129   | 1.103186 | 0.002085 | 0.002419 |
| Pcdhga10 | 0.500301 | 0.002102 | 0.002438 |
| Cdk16    | 0.165814 | 0.002109 | 0.002446 |
| Wdr48    | 0.178276 | 0.002111 | 0.002448 |
| Gm38036  | 0.448024 | 0.002119 | 0.002457 |
| Gm48889  | 0.560679 | 0.002123 | 0.002462 |
| Msantd4  | 0.16927  | 0.002148 | 0.00249  |
| Fbxo44   | 0.430388 | 0.002149 | 0.002491 |
| Mtg1     | 0.326675 | 0.00215  | 0.002492 |
| Nacad    | 0.552791 | 0.002181 | 0.002528 |
| 1700105P | 0.989453 | 0.002223 | 0.002576 |

|          |          |          |          |
|----------|----------|----------|----------|
| Itgb3bp  | 0.253037 | 0.002231 | 0.002585 |
| Nudt1    | 0.380706 | 0.002251 | 0.002607 |
| Gm49085  | 0.799338 | 0.002251 | 0.002607 |
| Kif27    | 1.201095 | 0.002258 | 0.002616 |
| Tmem18   | 0.281942 | 0.00226  | 0.002617 |
| Hars     | 0.187464 | 0.002275 | 0.002634 |
| Nprl2    | 0.277545 | 0.002277 | 0.002637 |
| Eya3     | 0.269613 | 0.002301 | 0.002664 |
| Pigl     | 0.457967 | 0.002303 | 0.002667 |
| H3c4     | 0.901606 | 0.002333 | 0.002701 |
| Uppt     | 0.830055 | 0.002353 | 0.002724 |
| Osbpl7   | 0.293625 | 0.002356 | 0.002728 |
| Sanbr    | 0.267695 | 0.002377 | 0.002751 |
| Cdipt    | 0.154268 | 0.00249  | 0.002881 |
| Tmub2    | 0.229639 | 0.002511 | 0.002905 |
| C430014B | 0.85269  | 0.002515 | 0.00291  |
| Porcn    | 0.276027 | 0.002562 | 0.002963 |
| Pgbd5    | 0.443622 | 0.002578 | 0.002981 |
| 1700123O | 0.188751 | 0.002603 | 0.003009 |
| Podxl2   | 0.280178 | 0.002623 | 0.003032 |
| Gm48138  | 0.343574 | 0.002627 | 0.003036 |
| Nup133   | 0.258207 | 0.002632 | 0.003041 |
| Snrpd3   | 0.116759 | 0.002641 | 0.003052 |
| Fbxo4    | 0.288819 | 0.002652 | 0.003064 |
| D2hgdh   | 0.373938 | 0.002656 | 0.003069 |
| Pigz     | 0.465443 | 0.00267  | 0.003084 |
| Pdrg1    | 0.146731 | 0.002684 | 0.0031   |
| Mlycd    | 0.217599 | 0.002747 | 0.003172 |
| Grcc10   | 0.16355  | 0.002805 | 0.003238 |
| Gm11491  | 0.91546  | 0.002807 | 0.00324  |
| Gpr158   | 0.918879 | 0.002813 | 0.003247 |
| Antkmt   | 0.381392 | 0.002826 | 0.003261 |
| Lars     | 0.160634 | 0.002855 | 0.003295 |
| Dmap1    | 0.266487 | 0.002858 | 0.003298 |
| Gm45354  | 0.952182 | 0.002862 | 0.003302 |
| Lipo3    | 0.364691 | 0.002894 | 0.003339 |
| Gm28941  | 0.836719 | 0.002926 | 0.003374 |
| Chm      | 0.17444  | 0.00293  | 0.003379 |
| Trnau1ap | 0.142308 | 0.002981 | 0.003437 |
| Zhx1     | 0.133335 | 0.003005 | 0.003464 |
| Gm42782  | 1.014721 | 0.003006 | 0.003465 |
| Gm42872  | 1.101003 | 0.003009 | 0.003469 |
| Palb2    | 0.551922 | 0.003031 | 0.003493 |
| Atp5c1   | 0.083857 | 0.00305  | 0.003515 |
| Selenot  | 0.104772 | 0.003055 | 0.00352  |
| Sgsm1    | 0.681013 | 0.003135 | 0.003611 |
| Zfp622   | 0.183366 | 0.003135 | 0.003611 |

|         |          |          |          |
|---------|----------|----------|----------|
| Gm13625 | 0.71776  | 0.003196 | 0.003681 |
| Sirt7   | 0.185735 | 0.003214 | 0.0037   |
| Nptx2   | 0.838177 | 0.003214 | 0.0037   |
| Gm4540  | 0.857722 | 0.003223 | 0.00371  |
| Trim45  | 0.470994 | 0.003271 | 0.003766 |
| Bap1    | 0.211577 | 0.003327 | 0.00383  |
| Mindy3  | 0.197508 | 0.003331 | 0.003834 |
| Zfp39   | 0.355599 | 0.003336 | 0.003839 |
| Nceh1   | 0.169885 | 0.003344 | 0.003849 |
| Gm42979 | 0.422573 | 0.003391 | 0.003901 |
| Dr1     | 0.195888 | 0.003406 | 0.003918 |
| Zdhhc24 | 0.355162 | 0.003435 | 0.003951 |
| Ube2i   | 0.10732  | 0.003443 | 0.00396  |
| Coa3    | 0.114527 | 0.003454 | 0.003972 |
| Gm10933 | 0.704513 | 0.003464 | 0.003984 |
| Mrpl42  | 0.126531 | 0.003496 | 0.004019 |
| Aldh1l2 | 0.9394   | 0.003612 | 0.004152 |
| Rrp36   | 0.247416 | 0.003636 | 0.004179 |
| Jmy     | 0.124892 | 0.00368  | 0.00423  |
| Zfp286  | 0.477953 | 0.003693 | 0.004244 |
| Gm16845 | 0.661923 | 0.003705 | 0.004258 |
| Rpp14   | 0.217246 | 0.003811 | 0.004379 |
| Tmem25  | 0.679145 | 0.003813 | 0.00438  |
| Armc5   | 0.262579 | 0.003818 | 0.004386 |
| Gm26691 | 0.913231 | 0.003822 | 0.00439  |
| Naga    | 0.253892 | 0.003833 | 0.004403 |
| Gm47503 | 0.854506 | 0.003835 | 0.004404 |
| Nol3    | 0.55992  | 0.00388  | 0.004455 |
| Gm25541 | 1.05918  | 0.003894 | 0.00447  |
| Stmn3   | 0.236983 | 0.003914 | 0.004493 |
| Dcun1d5 | 0.141053 | 0.003941 | 0.004523 |
| Klhl20  | 0.212181 | 0.003954 | 0.004538 |
| Bmf     | 0.332056 | 0.003995 | 0.004584 |
| Nmral1  | 0.474666 | 0.004009 | 0.0046   |
| Zfp30   | 0.231192 | 0.004037 | 0.004631 |
| Gm5857  | 0.723424 | 0.004061 | 0.004658 |
| Ccdc22  | 0.341043 | 0.004112 | 0.004716 |
| Prkag1  | 0.157537 | 0.004147 | 0.004755 |
| Gm45399 | 0.915914 | 0.004172 | 0.004784 |
| Igfbp1  | 0.147623 | 0.0042   | 0.004815 |
| Prep    | 0.262575 | 0.004205 | 0.004821 |
| Mrps9   | 0.186635 | 0.00421  | 0.004826 |
| Elp6    | 0.385674 | 0.004291 | 0.004918 |
| Nlr1    | 0.482704 | 0.004308 | 0.004938 |
| Slc30a6 | 0.300294 | 0.004323 | 0.004955 |
| Gm29562 | 1.050985 | 0.004329 | 0.004961 |
| Dtx2    | 0.304218 | 0.004367 | 0.005004 |

|          |          |          |          |
|----------|----------|----------|----------|
| Krtcap3  | 0.71479  | 0.004534 | 0.005193 |
| ENSMUSG  | 0.600932 | 0.004565 | 0.005229 |
| Gm10297  | 0.905356 | 0.004569 | 0.005233 |
| Gm44270  | 0.50902  | 0.004594 | 0.005261 |
| Leprotl1 | 0.141653 | 0.004615 | 0.005283 |
| Gm20172  | 0.766815 | 0.004668 | 0.005344 |
| H4c4     | 0.179132 | 0.004799 | 0.005494 |
| Top3a    | 0.438311 | 0.004854 | 0.005556 |
| Grem2    | 1.012871 | 0.004913 | 0.005622 |
| Gm45084  | 0.681958 | 0.004938 | 0.005651 |
| Amd2     | 0.495205 | 0.004951 | 0.005665 |
| Pex19    | 0.177471 | 0.004982 | 0.0057   |
| Ube4b    | 0.155171 | 0.005008 | 0.005729 |
| Ppp5c    | 0.175266 | 0.005025 | 0.005748 |
| Sec24c   | 0.172311 | 0.005147 | 0.005886 |
| Ccdc17   | 0.573212 | 0.005215 | 0.005962 |
| Fpgt     | 0.278185 | 0.005247 | 0.005998 |
| Skiv2l   | 0.206801 | 0.005256 | 0.006009 |
| Ggnbp2   | 0.107151 | 0.005262 | 0.006015 |
| Zfp532   | 0.174293 | 0.005275 | 0.006029 |
| Gm3695   | 0.979983 | 0.005335 | 0.006096 |
| Ddx39a   | 0.205283 | 0.005446 | 0.00622  |
| Usf3     | 0.169079 | 0.005453 | 0.006228 |
| Mrpl12   | 0.142    | 0.005514 | 0.006298 |
| Hmga1    | 0.518448 | 0.005563 | 0.006352 |
| Pkd2l2   | 0.868017 | 0.005644 | 0.006443 |
| Serac1   | 0.675462 | 0.005669 | 0.006471 |
| Ppat     | 0.288561 | 0.005701 | 0.006507 |
| G2e3     | 0.21465  | 0.005711 | 0.006518 |
| Strap    | 0.121065 | 0.005734 | 0.006544 |
| Lat      | 1.15349  | 0.00574  | 0.00655  |
| Brd2     | 0.088326 | 0.005783 | 0.006598 |
| Zfp580   | 0.209253 | 0.005828 | 0.006649 |
| Ik       | 0.100977 | 0.005852 | 0.006675 |
| Naa12    | 0.130181 | 0.005858 | 0.006682 |
| 4930470G | 0.848641 | 0.006044 | 0.006892 |
| Tiam2    | 1.106099 | 0.006083 | 0.006936 |
| Inca1    | 0.514796 | 0.006136 | 0.006996 |
| Foxj1    | 0.808598 | 0.006144 | 0.007004 |
| Gm37101  | 0.407321 | 0.006197 | 0.007063 |
| Parl     | 0.162448 | 0.006361 | 0.007249 |
| Zfp473   | 0.823087 | 0.006694 | 0.007626 |
| Klhl22   | 0.253521 | 0.006698 | 0.00763  |
| Siva1    | 0.143745 | 0.006752 | 0.007691 |
| Camk2b   | 0.278078 | 0.006764 | 0.007704 |
| Tomm40l  | 0.230564 | 0.006779 | 0.00772  |
| Gm44283  | 0.372742 | 0.006782 | 0.007723 |

|           |          |          |          |
|-----------|----------|----------|----------|
| Acad11    | 0.273347 | 0.006789 | 0.00773  |
| Smc6      | 0.106855 | 0.006806 | 0.007748 |
| 9130401N  | 0.216051 | 0.006814 | 0.007758 |
| Smarce1   | 0.130486 | 0.006833 | 0.007779 |
| Gm44901   | 0.652367 | 0.006873 | 0.007824 |
| Unc13d    | 0.730672 | 0.006943 | 0.007902 |
| Gm26575   | 0.945041 | 0.007003 | 0.007968 |
| Vdac1     | 0.08613  | 0.00705  | 0.008022 |
| Gm10571   | 0.992518 | 0.007117 | 0.008097 |
| Dnd1      | 0.900586 | 0.007138 | 0.00812  |
| Gm48627   | 0.87387  | 0.007282 | 0.008282 |
| Pgpep1    | 0.231186 | 0.007295 | 0.008296 |
| Cdt1      | 0.669232 | 0.007503 | 0.008529 |
| Nfkbie    | 0.636861 | 0.007518 | 0.008546 |
| Gm14391   | 0.69085  | 0.00754  | 0.00857  |
| Fcho1     | 0.610754 | 0.007542 | 0.008572 |
| Gm43029   | 0.781811 | 0.007589 | 0.008625 |
| Phtf1os   | 0.613164 | 0.007615 | 0.008653 |
| Mrps14    | 0.095277 | 0.007668 | 0.008712 |
| Snrnp35   | 0.258657 | 0.007674 | 0.008719 |
| B3gat2    | 0.375286 | 0.007724 | 0.008774 |
| Retreg3   | 0.143944 | 0.007743 | 0.008796 |
| Coprs     | 0.2217   | 0.007812 | 0.008874 |
| Map2k2    | 0.106819 | 0.00802  | 0.009106 |
| Gm47963   | 0.56329  | 0.008029 | 0.009115 |
| Rps13-ps4 | 0.899421 | 0.008032 | 0.009117 |
| Pex11b    | 0.189136 | 0.008044 | 0.009131 |
| Mtrf1     | 0.398452 | 0.008061 | 0.009149 |
| Zbtb38    | 0.100085 | 0.008095 | 0.009186 |
| Commd10   | 0.185214 | 0.008246 | 0.009356 |
| Gm30340   | 0.604759 | 0.008381 | 0.009506 |
| Kat8      | 0.214831 | 0.008574 | 0.009721 |
| Ankmy1    | 0.968234 | 0.008632 | 0.009784 |
| Etaa1os   | 0.462278 | 0.008648 | 0.009802 |
| Siglece   | 0.986178 | 0.008743 | 0.009907 |
| 2410022N  | 0.274968 | 0.008866 | 0.010045 |
| Xrcc1     | 0.211554 | 0.008885 | 0.010066 |
| Atxn7     | 0.125845 | 0.009143 | 0.010355 |
| Sft2d1    | 0.259898 | 0.009169 | 0.010383 |
| Gins1     | 0.793395 | 0.009184 | 0.0104   |
| Oxsm      | 0.389555 | 0.009191 | 0.010407 |
| D130020Li | 0.354921 | 0.009231 | 0.01045  |
| H2-K2     | 0.292708 | 0.009231 | 0.01045  |
| Gm43167   | 0.875016 | 0.009283 | 0.010508 |
| Polh      | 0.338927 | 0.009296 | 0.010522 |
| Ppp6r1    | 0.164048 | 0.009359 | 0.010592 |
| Jade3     | 0.375584 | 0.009366 | 0.010599 |

|            |          |          |          |
|------------|----------|----------|----------|
| Marf1      | 0.111826 | 0.009558 | 0.010814 |
| Ufm1       | 0.125171 | 0.009623 | 0.010886 |
| Gm34294    | 0.894064 | 0.009724 | 0.010998 |
| Gm45342    | 0.455514 | 0.009778 | 0.011059 |
| Rbis       | 0.146394 | 0.009813 | 0.011098 |
| Disp2      | 0.534499 | 0.009825 | 0.01111  |
| Tmem79     | 0.763971 | 0.00986  | 0.011149 |
| Gm47483    | 0.298575 | 0.010045 | 0.011355 |
| Fars2      | 0.244636 | 0.010088 | 0.011404 |
| Arl6ip1    | 0.078368 | 0.01015  | 0.011469 |
| Tfpt       | 0.224345 | 0.010485 | 0.011845 |
| Noc4l      | 0.309394 | 0.010489 | 0.011848 |
| Pmvk       | 0.148165 | 0.010665 | 0.012045 |
| Preb       | 0.150178 | 0.010927 | 0.012337 |
| Slc2a4rg-p | 0.38984  | 0.011004 | 0.012423 |
| Gm38309    | 0.746335 | 0.011035 | 0.012457 |
| Fbxo46     | 0.291148 | 0.01112  | 0.012552 |
| Gabra2     | 0.795952 | 0.011144 | 0.012578 |
| Wrnip1     | 0.159604 | 0.011152 | 0.012586 |
| Cpsf4      | 0.25623  | 0.011205 | 0.012645 |
| Pelp1      | 0.193038 | 0.011219 | 0.01266  |
| Abhd14b    | 0.147459 | 0.011334 | 0.012785 |
| Eno3       | 0.461467 | 0.011634 | 0.01312  |
| Nabp2      | 0.133182 | 0.011658 | 0.013146 |
| Zc3hc1     | 0.231054 | 0.011678 | 0.013167 |
| Ndufaf7    | 0.153069 | 0.011762 | 0.013262 |
| Tmem165    | 0.116555 | 0.011878 | 0.01339  |
| 4930426l2  | 0.457818 | 0.011954 | 0.013474 |
| Fam189b    | 0.336679 | 0.011961 | 0.01348  |
| Gm47218    | 0.680171 | 0.012007 | 0.013531 |
| Gm10209    | 0.741453 | 0.012123 | 0.01366  |
| Gm17951    | 0.673905 | 0.01214  | 0.013678 |
| 4930534H   | 0.879164 | 0.012181 | 0.013723 |
| Prob1      | 0.484511 | 0.012257 | 0.013807 |
| Farsb      | 0.163849 | 0.012531 | 0.014111 |
| Ank        | 0.176062 | 0.012551 | 0.014133 |
| ENSMUSG    | 0.838881 | 0.012617 | 0.014206 |
| Tollip     | 0.151361 | 0.012667 | 0.014262 |
| Zmym3      | 0.201431 | 0.012678 | 0.014273 |
| Cdc14b     | 0.242556 | 0.01269  | 0.014285 |
| Grhl1      | 0.607458 | 0.012691 | 0.014286 |
| Gm45266    | 0.509052 | 0.012984 | 0.014612 |
| Hacd2      | 0.172946 | 0.013008 | 0.014638 |
| Zzef1      | 0.156989 | 0.013053 | 0.014687 |
| Nemp2      | 0.345606 | 0.013109 | 0.014746 |
| Cnpy2      | 0.104948 | 0.013153 | 0.014795 |
| Syap1      | 0.139158 | 0.013274 | 0.014929 |



|          |          |          |          |
|----------|----------|----------|----------|
| Ndst2    | 0.239576 | 0.013322 | 0.014982 |
| Tsacc    | 0.491408 | 0.013386 | 0.015052 |
| Gm14049  | 0.57845  | 0.013416 | 0.015085 |
| Clta     | 0.068358 | 0.013434 | 0.015104 |
| Pole4    | 0.12759  | 0.013788 | 0.015499 |
| Fam76b   | 0.124351 | 0.013825 | 0.015538 |
| Gas6     | 0.088776 | 0.014049 | 0.015786 |
| Klhl25   | 0.274853 | 0.014064 | 0.015803 |
| Ccdc124  | 0.113274 | 0.014157 | 0.015903 |
| Slc9a6   | 0.199032 | 0.014387 | 0.016157 |
| Mettl9   | 0.103436 | 0.014397 | 0.016167 |
| Cyb561d1 | 0.335442 | 0.014532 | 0.016316 |
| Cyb5rl   | 0.508466 | 0.014588 | 0.016378 |
| Gm7265   | 0.380362 | 0.014679 | 0.016479 |
| 9530056E | 0.276778 | 0.014687 | 0.016486 |
| Wnk1     | 0.066193 | 0.014689 | 0.016487 |
| C77080   | 0.467502 | 0.014962 | 0.016789 |
| Tbk1     | 0.147664 | 0.015194 | 0.017043 |
| Arrb2    | 0.235031 | 0.015226 | 0.017079 |
| Ahcy     | 0.56652  | 0.01541  | 0.017284 |
| Zfp64    | 0.251904 | 0.015419 | 0.017292 |
| Apaf1    | 0.241263 | 0.015474 | 0.017353 |
| Gm16259  | 0.729648 | 0.015578 | 0.017467 |
| B330016D | 0.181098 | 0.015579 | 0.017467 |
| Mfsd11   | 0.225259 | 0.015619 | 0.017511 |
| Suco     | 0.119429 | 0.015633 | 0.017523 |
| Agap1    | 0.104048 | 0.015659 | 0.017551 |
| Hk1os    | 0.59974  | 0.016076 | 0.018011 |
| Gm48961  | 0.69506  | 0.016126 | 0.018066 |
| Rbbp4    | 0.089193 | 0.016134 | 0.018074 |
| Gm38115  | 0.365406 | 0.016203 | 0.018148 |
| Phkg2    | 0.180617 | 0.016475 | 0.018449 |
| Poldip2  | 0.141999 | 0.01656  | 0.018543 |
| Jazf1    | 0.652906 | 0.016929 | 0.018954 |
| Gm45632  | 0.740976 | 0.016971 | 0.018999 |
| Eprs     | 0.090413 | 0.017074 | 0.019112 |
| Eps8l1   | 0.399412 | 0.01732  | 0.019384 |
| Glyr1    | 0.105774 | 0.017355 | 0.019422 |
| Gm37399  | 0.28267  | 0.017366 | 0.019433 |
| Arl6ip4  | 0.11307  | 0.017393 | 0.019462 |
| Socs6    | 0.167579 | 0.017555 | 0.019641 |
| Nsun2    | 0.160709 | 0.017724 | 0.019827 |
| Gm49839  | 0.365485 | 0.01787  | 0.019988 |
| Plrg1    | 0.174166 | 0.018073 | 0.020213 |
| 9530056K | 0.867392 | 0.018215 | 0.020369 |
| Mrpl53   | 0.667626 | 0.018348 | 0.020514 |
| Gm20633  | 0.770708 | 0.01835  | 0.020515 |

|           |          |          |          |
|-----------|----------|----------|----------|
| Lig1      | 0.192413 | 0.018397 | 0.020566 |
| 54304020  | 0.606827 | 0.018511 | 0.02069  |
| Gm42508   | 0.672103 | 0.018562 | 0.020745 |
| Usp51     | 0.668926 | 0.018708 | 0.020905 |
| Vmac      | 0.195678 | 0.018791 | 0.020996 |
| Selenoh   | 0.116993 | 0.018838 | 0.021045 |
| Arhgef10l | 0.245542 | 0.01893  | 0.021146 |
| Gm12898   | 0.770718 | 0.018959 | 0.021177 |
| C230035l1 | 0.607572 | 0.018971 | 0.021189 |
| Gpkow     | 0.179413 | 0.019142 | 0.021379 |
| Fbl       | 0.157014 | 0.019299 | 0.021552 |
| Mthfd1    | 0.269127 | 0.019537 | 0.021815 |
| Plk4      | 0.349573 | 0.019823 | 0.022128 |
| Gm49260   | 0.735217 | 0.020006 | 0.022329 |
| Slc26a11  | 0.3281   | 0.0203   | 0.022654 |
| Gm45484   | 0.785173 | 0.020425 | 0.022792 |
| Rnf208    | 0.311776 | 0.020834 | 0.023247 |
| Hsd17b12  | 0.122161 | 0.021201 | 0.023651 |
| Rpl21-ps3 | 0.706744 | 0.021333 | 0.023797 |
| Gm36527   | 0.684476 | 0.021514 | 0.023994 |
| Gm13408   | 0.71227  | 0.02163  | 0.024123 |
| Armxc3    | 0.123782 | 0.021941 | 0.024467 |
| Mtbp      | 0.317702 | 0.021983 | 0.024513 |
| Pcdhgc4   | 0.313599 | 0.02202  | 0.024552 |
| Gm42941   | 0.673604 | 0.022081 | 0.024618 |
| Glyctk    | 0.683192 | 0.022104 | 0.024642 |
| Gm44636   | 0.680549 | 0.022249 | 0.024801 |
| Cisd3     | 0.171701 | 0.022281 | 0.024834 |
| Gm24362   | 0.709384 | 0.022297 | 0.02485  |
| Pafah1b3  | 0.163626 | 0.022402 | 0.024965 |
| Slc12a9   | 0.232095 | 0.022459 | 0.025027 |
| Etfrf1    | 0.170497 | 0.022692 | 0.025285 |
| Myo7a     | 0.427962 | 0.022737 | 0.025332 |
| Pik3r4    | 0.177111 | 0.022785 | 0.025382 |
| Uso1      | 0.124708 | 0.022913 | 0.025519 |
| Zfp599    | 0.713538 | 0.022919 | 0.025524 |
| Lsm3      | 0.141683 | 0.02294  | 0.025545 |
| Vmn2r57   | 0.736828 | 0.022993 | 0.0256   |
| Ciao1     | 0.14951  | 0.023027 | 0.025636 |
| Txndc9    | 0.104463 | 0.023072 | 0.025685 |
| Pus7l     | 0.455743 | 0.023148 | 0.025768 |
| Akap7     | 0.128328 | 0.023227 | 0.025853 |
| Ppp2ca    | 0.074045 | 0.023333 | 0.025968 |
| Dapk3     | 0.166933 | 0.023737 | 0.026412 |
| Gm43133   | 0.546484 | 0.023779 | 0.026456 |
| Elp3      | 0.178398 | 0.023819 | 0.026496 |
| Gm50094   | 0.472947 | 0.02413  | 0.026834 |

|           |          |          |          |
|-----------|----------|----------|----------|
| Rxrb      | 0.13469  | 0.024146 | 0.026851 |
| Slc5a5    | 0.558287 | 0.024185 | 0.026892 |
| Slc7a4    | 0.570772 | 0.024272 | 0.026986 |
| Cradd     | 0.206916 | 0.024512 | 0.027249 |
| 4833418N  | 0.385818 | 0.024563 | 0.027303 |
| Rap2a     | 0.143084 | 0.024985 | 0.027767 |
| Prrc2a    | 0.085863 | 0.025063 | 0.027852 |
| Ddx56     | 0.203889 | 0.025134 | 0.027928 |
| H4c1      | 0.66327  | 0.025409 | 0.028228 |
| Gm15420   | 0.656296 | 0.025614 | 0.028454 |
| Prickle1  | 0.118714 | 0.025619 | 0.028456 |
| Armc6     | 0.291809 | 0.025623 | 0.028459 |
| Mia3      | 0.084043 | 0.025773 | 0.028623 |
| Mrpl1     | 0.177742 | 0.025866 | 0.028725 |
| Gstp-ps   | 0.33004  | 0.026238 | 0.029127 |
| Gm9803    | 0.498583 | 0.026242 | 0.02913  |
| Gm22146   | 0.564949 | 0.0263   | 0.029192 |
| Endov     | 0.227959 | 0.02662  | 0.029542 |
| Rtf1      | 0.076379 | 0.026764 | 0.029698 |
| Hdac8     | 0.254648 | 0.026881 | 0.029823 |
| Gm5628    | 0.623063 | 0.026993 | 0.029943 |
| Pdcd11    | 0.146553 | 0.027083 | 0.03004  |
| Gm49797   | 0.207135 | 0.027423 | 0.030413 |
| Trim46    | 0.576118 | 0.027516 | 0.03051  |
| Gm12183   | 0.600133 | 0.027744 | 0.03076  |
| Mastl     | 0.591257 | 0.027926 | 0.030957 |
| Slc22a13b | 0.780461 | 0.02794  | 0.030971 |
| Imp4      | 0.140809 | 0.028057 | 0.031098 |
| Zkscan17  | 0.176587 | 0.028243 | 0.031294 |
| Trappc5   | 0.118639 | 0.028243 | 0.031294 |
| Actr1b    | 0.117329 | 0.028336 | 0.031395 |
| Bri3bp    | 0.227828 | 0.028636 | 0.031725 |
| Sike1     | 0.103667 | 0.028767 | 0.031864 |
| Rps15a-ps | 0.485229 | 0.028767 | 0.031864 |
| 2310033P  | 0.132201 | 0.02882  | 0.031919 |
| Bud23     | 0.168518 | 0.029664 | 0.032844 |
| Gm14410   | 0.665973 | 0.02977  | 0.032955 |
| Sdr42e1   | 0.537395 | 0.029838 | 0.033026 |
| Snx15     | 0.146064 | 0.030025 | 0.033228 |
| Slc35c2   | 0.219061 | 0.030278 | 0.033502 |
| Cgrrf1    | 0.128297 | 0.030364 | 0.033592 |
| Cic       | 0.109066 | 0.030458 | 0.033691 |
| Elapor2   | 0.640124 | 0.030538 | 0.033778 |
| Mrpl55    | 0.141167 | 0.030761 | 0.034017 |
| Gm37023   | 0.559697 | 0.03078  | 0.034035 |
| Gm11737   | 0.597249 | 0.030839 | 0.034098 |
| D430019H  | 0.679353 | 0.03086  | 0.034119 |

|           |          |          |          |
|-----------|----------|----------|----------|
| Zmat3     | 0.201793 | 0.031029 | 0.034303 |
| Rufy1     | 0.13842  | 0.031291 | 0.034582 |
| Slc33a1   | 0.182328 | 0.031406 | 0.034707 |
| Med15     | 0.122242 | 0.031679 | 0.035006 |
| Kdm2b     | 0.176939 | 0.031732 | 0.03506  |
| Syngap1   | 0.431049 | 0.03202  | 0.035375 |
| Zfp628    | 0.255408 | 0.03204  | 0.035394 |
| Tbc1d20   | 0.10692  | 0.032315 | 0.035696 |
| Gm30015   | 0.513288 | 0.032578 | 0.035981 |
| Gpatch1   | 0.164255 | 0.032727 | 0.036143 |
| Abca7     | 0.164287 | 0.032816 | 0.036238 |
| Gm35315   | 0.676279 | 0.032828 | 0.036246 |
| Mpv17     | 0.127744 | 0.033013 | 0.036448 |
| Ttll12    | 0.264548 | 0.033167 | 0.03661  |
| Hdac10    | 0.266178 | 0.033194 | 0.036637 |
| Ddx25     | 0.47662  | 0.033198 | 0.036639 |
| Spsb4     | 0.835551 | 0.033306 | 0.036753 |
| Med11     | 0.220298 | 0.033389 | 0.036842 |
| Mcf2      | 0.632143 | 0.033419 | 0.036872 |
| Gm26982   | 0.384139 | 0.033572 | 0.037038 |
| Szrd1     | 0.10955  | 0.033812 | 0.0373   |
| Pcyt1a    | 0.118978 | 0.033854 | 0.037343 |
| 4732491K  | 0.37799  | 0.03408  | 0.03759  |
| 1700094D  | 0.532934 | 0.034083 | 0.03759  |
| Gm41760   | 0.534703 | 0.034367 | 0.037898 |
| Cfap126   | 0.596859 | 0.034572 | 0.038116 |
| Dcakd     | 0.186013 | 0.034631 | 0.038178 |
| 5033417F  | 0.547927 | 0.035215 | 0.038814 |
| Gm12655   | 0.552757 | 0.035263 | 0.038863 |
| 1700087I2 | 0.766197 | 0.035427 | 0.039039 |
| 7SK-110   | 0.654994 | 0.035519 | 0.039134 |
| Gm42672   | 0.739169 | 0.035554 | 0.03917  |
| 2410006H  | 0.084954 | 0.035905 | 0.039544 |
| Creld2    | 0.15925  | 0.036125 | 0.039784 |
| Gm48161   | 0.674685 | 0.03649  | 0.04018  |
| Gm48890   | 0.324659 | 0.036948 | 0.040678 |
| Gpc1      | 0.336166 | 0.037007 | 0.04074  |
| Prpf6     | 0.102531 | 0.037191 | 0.040937 |
| Mepce     | 0.128827 | 0.037429 | 0.041196 |
| Gm43482   | 0.438089 | 0.037742 | 0.041531 |
| Dclre1c   | 0.305931 | 0.03783  | 0.041625 |
| Gm37676   | 0.634346 | 0.038167 | 0.041989 |
| Pgbd1     | 0.57726  | 0.038421 | 0.042266 |
| Adck1     | 0.246714 | 0.038646 | 0.042507 |
| Cand2     | 0.340301 | 0.038699 | 0.042562 |
| Gm42856   | 0.446874 | 0.0389   | 0.042777 |
| Dhx33     | 0.242481 | 0.039016 | 0.042902 |

|           |          |          |          |
|-----------|----------|----------|----------|
| Zfp551    | 0.432042 | 0.039532 | 0.043462 |
| Gm10643   | 0.613944 | 0.039687 | 0.043626 |
| Smu1      | 0.102953 | 0.040052 | 0.044021 |
| Pea15a    | 0.0599   | 0.040136 | 0.04411  |
| Gm43544   | 0.43186  | 0.040207 | 0.044186 |
| Slc2a8    | 0.223453 | 0.040228 | 0.044202 |
| Acsf3     | 0.27104  | 0.040256 | 0.04423  |
| Gm13423   | 0.438223 | 0.040559 | 0.044559 |
| Gm16835   | 0.661979 | 0.040572 | 0.04457  |
| Timm17b   | 0.116937 | 0.040788 | 0.044801 |
| Ubb-ps    | 0.148244 | 0.041167 | 0.045213 |
| Nfkb2     | 0.227461 | 0.041546 | 0.045619 |
| Ccdc28a   | 0.223668 | 0.041606 | 0.04568  |
| Cct8      | 0.077796 | 0.042337 | 0.046464 |
| Asxl1     | 0.128602 | 0.043408 | 0.047622 |
| Eftud2    | 0.107736 | 0.04354  | 0.04776  |
| Rps2-ps10 | 0.292118 | 0.043786 | 0.048024 |
| Gm6542    | 0.402935 | 0.044086 | 0.048342 |
| Dnmt3b    | 0.303554 | 0.044189 | 0.048448 |
| Mtrfr     | 0.177432 | 0.044289 | 0.048553 |
| Dtnbp1    | 0.120691 | 0.044323 | 0.048587 |
| Sbsn      | 0.76785  | 0.044432 | 0.048692 |
| Gm36638   | 0.4431   | 0.044481 | 0.048743 |
| Gm44830   | 0.628072 | 0.044589 | 0.048857 |
| Tmem147   | 0.093154 | 0.044756 | 0.049037 |
| Ubal1     | 0.135812 | 0.044849 | 0.049135 |
| Acat1     | 0.102074 | 0.044943 | 0.049231 |
| Hdac3     | 0.139064 | 0.044963 | 0.04925  |
| Slc35b1   | 0.105298 | 0.045177 | 0.049473 |
| Phc1      | 0.117602 | 0.045208 | 0.049503 |
| Zfp646    | 0.129618 | 0.045395 | 0.049704 |
| Gm6710    | 0.284439 | 0.045449 | 0.049759 |
| Gm44623   | 0.484686 | 0.045487 | 0.049797 |
| Gm38375   | 0.50815  | 0.045555 | 0.049868 |
| Zfand4    | 0.474108 | 0.045748 | 0.050073 |
| Tmem33    | 0.094791 | 0.045849 | 0.050179 |
| Gpr173    | 0.421445 | 0.046363 | 0.050734 |
| Fem1a     | 0.53219  | 0.046913 | 0.051329 |
| Gm11423   | 0.438752 | 0.047578 | 0.052045 |
| Pcdhgb2   | 0.39184  | 0.047869 | 0.052352 |
| Ndor1-1   | 0.41106  | 0.048695 | 0.053236 |
| Nudt2     | 0.132318 | 0.049279 | 0.05387  |
| 1500002C  | 0.476145 | 0.049548 | 0.054152 |
| Gtf2h2    | 0.177529 | 0.050795 | 0.055499 |
| Elovl6    | 0.224208 | 0.051644 | 0.056418 |
| A730081D  | 0.570066 | 0.051727 | 0.056505 |
| Proser2   | 0.121693 | 0.052155 | 0.056968 |

|          |          |          |          |
|----------|----------|----------|----------|
| Ccdc159  | 0.668702 | 0.05292  | 0.057791 |
| Mfsd3    | 0.41843  | 0.053102 | 0.057977 |
| Dip2c    | 0.126471 | 0.053186 | 0.05806  |
| Gm7972   | 0.608727 | 0.053507 | 0.058403 |
| Ppp4r2   | 0.083691 | 0.053533 | 0.058425 |
| Ccdc167  | 0.151324 | 0.053535 | 0.058425 |
| Gm37144  | 0.457789 | 0.053789 | 0.058697 |
| Vac14    | 0.198139 | 0.053883 | 0.058796 |
| Ltn1     | 0.119709 | 0.054253 | 0.059195 |
| D930036K | 0.648779 | 0.054473 | 0.059431 |
| Por      | 0.099897 | 0.054658 | 0.059625 |
| Gm9869   | 0.574362 | 0.055251 | 0.060262 |
| Dnhd1    | 0.505993 | 0.055482 | 0.060509 |
| Gm49327  | 0.255522 | 0.055625 | 0.060661 |
| Gm37663  | 0.266665 | 0.055909 | 0.060967 |
| Tmem259  | 0.095024 | 0.05612  | 0.061192 |
| Hgs      | 0.120923 | 0.056291 | 0.061374 |
| Commd9   | 0.158229 | 0.056395 | 0.061483 |
| Gm16060  | 0.371926 | 0.056718 | 0.061826 |
| Fbxl2    | 0.189625 | 0.056736 | 0.061841 |
| Nop9     | 0.178731 | 0.056961 | 0.062082 |
| Rsrc1    | 0.094083 | 0.057561 | 0.062731 |
| Dhx57    | 0.170827 | 0.057883 | 0.063074 |
| Efna2    | 0.42954  | 0.058173 | 0.06338  |
| Gm15421  | 0.57929  | 0.058387 | 0.063608 |
| Gm45343  | 0.281343 | 0.058521 | 0.063745 |
| Jtb      | 0.087939 | 0.058546 | 0.063767 |
| Gm15186  | 0.387115 | 0.058841 | 0.064085 |
| Nsfl1c   | 0.09433  | 0.059567 | 0.064866 |
| A230072C | 0.486473 | 0.059636 | 0.064936 |
| Gm37052  | 0.266554 | 0.05993  | 0.065252 |
| Gm15860  | 0.360877 | 0.060183 | 0.065522 |
| Fpgs     | 0.233214 | 0.060364 | 0.065714 |
| Gabrb3   | 0.198505 | 0.060438 | 0.06579  |
| Mad1l1   | 0.191357 | 0.060786 | 0.066164 |
| Ephb2    | 0.357461 | 0.061156 | 0.066557 |
| Mrpl17   | 0.087153 | 0.061863 | 0.067322 |
| Hmgb3    | 0.171184 | 0.06191  | 0.067368 |
| Alg1     | 0.149375 | 0.062585 | 0.068098 |
| Daam1    | 0.086724 | 0.062797 | 0.068323 |
| Rcc1l    | 0.255241 | 0.063345 | 0.068904 |
| Ppp1r11  | 0.072088 | 0.063372 | 0.068928 |
| Actl6b   | 0.467138 | 0.063389 | 0.068943 |
| Gm20492  | 0.437993 | 0.063528 | 0.069084 |
| Chst12   | 0.221371 | 0.063744 | 0.069314 |
| Pacc1    | 0.375901 | 0.063753 | 0.069318 |
| Slc35f6  | 0.187157 | 0.064213 | 0.069809 |

|            |          |          |          |
|------------|----------|----------|----------|
| Ergic3     | 0.071834 | 0.065589 | 0.071298 |
| Lrig1      | 0.153943 | 0.06567  | 0.071382 |
| Casp3      | 0.194443 | 0.066295 | 0.072041 |
| Nr3c2      | 0.1497   | 0.068188 | 0.07407  |
| Trmt6      | 0.143612 | 0.068947 | 0.074884 |
| Senp3      | 0.125955 | 0.069    | 0.074936 |
| Smarcal1   | 0.166628 | 0.069417 | 0.075384 |
| Ykt6       | 0.113462 | 0.071954 | 0.078104 |
| 4930412F   | 0.444977 | 0.072249 | 0.078419 |
| Aifm2      | 0.212695 | 0.072461 | 0.078643 |
| Rpn1       | 0.075872 | 0.074775 | 0.081149 |
| Tpr        | 0.051963 | 0.076762 | 0.083287 |
| Gm43360    | 0.364339 | 0.076987 | 0.083525 |
| Cklf       | 0.180591 | 0.076997 | 0.083531 |
| Elmo3      | 0.393864 | 0.077151 | 0.083692 |
| Tmem263    | 0.108536 | 0.0772   | 0.083738 |
| Psma1      | 0.06654  | 0.077949 | 0.084527 |
| Inpp5b     | 0.132737 | 0.078211 | 0.084804 |
| Gm13483    | 0.465605 | 0.078446 | 0.085053 |
| Gatb       | 0.273921 | 0.078732 | 0.08535  |
| Cenpl      | 0.263582 | 0.079588 | 0.08626  |
| Wwc1       | 0.434114 | 0.079633 | 0.086302 |
| Pfn4       | 0.446719 | 0.079691 | 0.086358 |
| Gm29394    | 0.553761 | 0.08088  | 0.087622 |
| Arl8a      | 0.09019  | 0.081448 | 0.088218 |
| 1110006O   | 0.513673 | 0.081856 | 0.088654 |
| Stk4       | 0.116486 | 0.082408 | 0.089238 |
| Cep192     | 0.144284 | 0.082574 | 0.089406 |
| Ccdc28b    | 0.090025 | 0.082877 | 0.08972  |
| Zkscan6    | 0.22832  | 0.082904 | 0.089743 |
| Lhpp       | 0.229205 | 0.083003 | 0.08984  |
| C130083A   | 0.486189 | 0.084626 | 0.091581 |
| Rpl10a-ps1 | 0.141047 | 0.08574  | 0.092766 |
| Tdrd9      | 0.656366 | 0.085976 | 0.093015 |
| Rfc1       | 0.075563 | 0.086265 | 0.093314 |
| Gm32282    | 0.352791 | 0.086976 | 0.09407  |
| Zfp229     | 0.19319  | 0.08782  | 0.094968 |
| Gm50232    | 0.358548 | 0.088331 | 0.095508 |
| Psm6       | 0.05849  | 0.088475 | 0.095656 |
| Tmod1      | 0.259102 | 0.088874 | 0.09608  |
| Slc36a1    | 0.250133 | 0.089101 | 0.096312 |
| Gm42658    | 0.509731 | 0.089304 | 0.096524 |
| Efcab2     | 0.189053 | 0.089362 | 0.09658  |
| Gm48335    | 0.560586 | 0.089471 | 0.096691 |
| Phf21a     | 0.088432 | 0.089569 | 0.09679  |
| Pitpnm2    | 0.091947 | 0.089588 | 0.096804 |
| Gys1       | 0.239222 | 0.090335 | 0.097603 |

|           |          |          |          |
|-----------|----------|----------|----------|
| Gm15712   | 0.309167 | 0.090745 | 0.098033 |
| Tstd2     | 0.159169 | 0.092682 | 0.100075 |
| Gm37583   | 0.146538 | 0.092721 | 0.100109 |
| Gm10762   | 0.229025 | 0.093138 | 0.100553 |
| Gm42822   | 0.386139 | 0.093588 | 0.101017 |
| Gm4430-1  | 0.538569 | 0.095111 | 0.102646 |
| Mios      | 0.155594 | 0.096522 | 0.104161 |
| Cdc45     | 0.439683 | 0.096728 | 0.104368 |
| Yjefn3    | 0.365378 | 0.096937 | 0.104586 |
| Gnal      | 0.337175 | 0.097833 | 0.105538 |
| Gm48949   | 0.507598 | 0.098764 | 0.106527 |
| Gm42878   | 0.599043 | 0.09935  | 0.107151 |
| MLlt1     | 0.14216  | 0.099686 | 0.107498 |
| Tcf12     | 0.060581 | 0.099946 | 0.10777  |
| Mapkap1   | 0.08979  | 0.100117 | 0.107947 |
| Gm37726   | 0.405598 | 0.101453 | 0.109356 |
| Usp50     | 0.307533 | 0.10157  | 0.109466 |
| Cnm3      | 0.11167  | 0.101666 | 0.109561 |
| Add2      | 0.330453 | 0.102586 | 0.110529 |
| Gpt2      | 0.352598 | 0.103127 | 0.111096 |
| Gm44616   | 0.487125 | 0.103258 | 0.11123  |
| Srcin1    | 0.286876 | 0.103554 | 0.11154  |
| Hspe1-rs1 | 0.406498 | 0.103566 | 0.111545 |
| 1700008JC | 0.201706 | 0.103613 | 0.111588 |
| Gmppa     | 0.167334 | 0.104323 | 0.112337 |
| Ccdc43    | 0.124558 | 0.104854 | 0.1129   |
| Cep131    | 0.24164  | 0.105096 | 0.113152 |
| Ypel5     | 0.088711 | 0.105338 | 0.113405 |
| Rnf114    | 0.098324 | 0.105477 | 0.113546 |
| Chpf2     | 0.146844 | 0.105553 | 0.113619 |
| Mib2      | 0.161568 | 0.106536 | 0.114661 |
| Atg5      | 0.093166 | 0.106893 | 0.115037 |
| Ap5z1     | 0.248908 | 0.106946 | 0.115087 |
| Cnot6l    | 0.05352  | 0.107483 | 0.115639 |
| Vps52     | 0.111777 | 0.107808 | 0.115972 |
| C230053D  | 0.2408   | 0.107858 | 0.116017 |
| Hus1      | 0.131455 | 0.108407 | 0.116592 |
| Gm2810    | 0.37619  | 0.108665 | 0.11686  |
| Tmem115   | 0.115648 | 0.108845 | 0.117045 |
| Gm43692   | 0.460625 | 0.109497 | 0.117738 |
| Ndufb10   | 0.049504 | 0.109873 | 0.118119 |
| Cpsf3     | 0.116055 | 0.110304 | 0.118564 |
| Gm49164   | 0.484    | 0.110914 | 0.119203 |
| Gm43294   | 0.49885  | 0.111192 | 0.119492 |
| Dll1      | 0.305416 | 0.111557 | 0.119876 |
| Gm44187   | 0.542633 | 0.111823 | 0.120153 |
| Tecpr1    | 0.072344 | 0.111832 | 0.120154 |



|          |          |          |          |
|----------|----------|----------|----------|
| Polr2l   | 0.10957  | 0.113163 | 0.121575 |
| Ccdc30   | 0.450062 | 0.114172 | 0.122624 |
| Gm36608  | 0.434642 | 0.115427 | 0.123954 |
| Zfp449   | 0.213144 | 0.116849 | 0.125455 |
| Gm28557  | 0.341672 | 0.116982 | 0.12558  |
| Zfp973   | 0.381373 | 0.117446 | 0.126068 |
| Lmbr1    | 0.126509 | 0.118354 | 0.127034 |
| Tmem97   | 0.165417 | 0.118432 | 0.127108 |
| Rilpl2   | 0.140711 | 0.11882  | 0.127516 |
| Gk       | 0.147673 | 0.119109 | 0.127807 |
| Trmt1    | 0.120288 | 0.120021 | 0.128768 |
| A430019L | 0.182911 | 0.121874 | 0.130718 |
| Ahsa2    | 0.099458 | 0.123194 | 0.132106 |
| Steep1   | 0.086688 | 0.123233 | 0.132138 |
| Rcl1     | 0.168949 | 0.123381 | 0.132288 |
| Vsig10l  | 0.388289 | 0.124094 | 0.133033 |
| Pitpnb   | 0.069388 | 0.124815 | 0.133796 |
| Gm43581  | 0.122165 | 0.12543  | 0.134417 |
| Cfap300  | 0.488474 | 0.12598  | 0.134987 |
| 58304620 | 0.465051 | 0.127111 | 0.136189 |
| Ndufc1   | 0.046013 | 0.127258 | 0.136334 |
| Gm48529  | 0.395888 | 0.127265 | 0.136334 |
| Gins3    | 0.305367 | 0.128811 | 0.137951 |
| Gm13375  | 0.402204 | 0.12937  | 0.13854  |
| Lzts3    | 0.271997 | 0.130324 | 0.139552 |
| Tmem39b  | 0.156472 | 0.130353 | 0.139573 |
| Gm42918  | 0.467037 | 0.130559 | 0.139779 |
| Aldh3a2  | 0.100187 | 0.130564 | 0.139779 |
| Niban3   | 0.445517 | 0.133021 | 0.142358 |
| Stard3   | 0.12537  | 0.133211 | 0.142552 |
| Ltb      | 0.71719  | 0.136403 | 0.145925 |
| Polr1h   | 0.067745 | 0.136418 | 0.145931 |
| Rpusd4   | 0.175554 | 0.137128 | 0.14668  |
| Tango2   | 0.137334 | 0.13723  | 0.146779 |
| Gm47246  | 0.398646 | 0.137445 | 0.146987 |
| Snapc1   | 0.080274 | 0.138139 | 0.14772  |
| Mon1a    | 0.162442 | 0.139432 | 0.149069 |
| Dubr     | 0.107817 | 0.139635 | 0.149276 |
| Gm38190  | 0.208387 | 0.141006 | 0.15071  |
| Abt1     | 0.110402 | 0.141583 | 0.151316 |
| Psmg1    | 0.117957 | 0.145457 | 0.155434 |
| Tiprl    | 0.072943 | 0.146025 | 0.156007 |
| Ndufs6   | 0.046232 | 0.146056 | 0.156029 |
| Ip6k3    | 0.357161 | 0.148185 | 0.158292 |
| Naa60    | 0.097378 | 0.148195 | 0.158292 |
| Ppif     | 0.203342 | 0.148464 | 0.158568 |
| Dnajc4   | 0.098711 | 0.149215 | 0.159335 |

|          |          |          |          |
|----------|----------|----------|----------|
| Sphkap   | 0.134147 | 0.150724 | 0.160889 |
| Acox3    | 0.120239 | 0.151487 | 0.161693 |
| Gm47797  | 0.340004 | 0.151922 | 0.162146 |
| Srf      | 0.162344 | 0.15244  | 0.162675 |
| 4930577N | 0.465341 | 0.153726 | 0.164024 |
| 9230112E | 0.367641 | 0.154148 | 0.16445  |
| Anapc7   | 0.092885 | 0.155318 | 0.165688 |
| Mrpl24   | 0.0697   | 0.155821 | 0.166212 |
| Xpa      | 0.093163 | 0.156161 | 0.166557 |
| Pwp2     | 0.192834 | 0.156167 | 0.166557 |
| Gm44130  | 0.457365 | 0.156379 | 0.166772 |
| Gm48585  | 0.157387 | 0.156527 | 0.166918 |
| Pygo2    | 0.114755 | 0.156697 | 0.167086 |
| Riox1    | 0.165798 | 0.157243 | 0.167657 |
| Brd7     | 0.070261 | 0.157343 | 0.167752 |
| Gm47260  | 0.327944 | 0.157719 | 0.16814  |
| Chd4     | 0.042366 | 0.158585 | 0.16904  |
| Snx21    | 0.087166 | 0.158936 | 0.16939  |
| Eif3g    | 0.055527 | 0.160959 | 0.171522 |
| Lonp2    | 0.073899 | 0.161492 | 0.172053 |
| Nfkbil1  | 0.113729 | 0.162912 | 0.173541 |
| Zfp53    | 0.175956 | 0.164021 | 0.174685 |
| 4933440N | 0.293536 | 0.165123 | 0.175846 |
| Gnb1l    | 0.29014  | 0.165267 | 0.175987 |
| Tbc1d5   | 0.108076 | 0.165682 | 0.176406 |
| Alg8     | 0.331994 | 0.169362 | 0.180233 |
| Gm26709  | 0.418863 | 0.169906 | 0.180773 |
| Mybbp1a  | 0.077203 | 0.170703 | 0.181582 |
| Prkce    | 0.08258  | 0.171069 | 0.181959 |
| Fbxo38   | 0.100228 | 0.172147 | 0.183053 |
| Gm14305  | 0.160126 | 0.172932 | 0.183875 |
| 9130604C | 0.296278 | 0.176558 | 0.18769  |
| Aip      | 0.064586 | 0.177582 | 0.188738 |
| Ubp2     | 0.070398 | 0.179631 | 0.190875 |
| Pef1     | 0.099954 | 0.179732 | 0.19097  |
| Gm38111  | 0.24754  | 0.179773 | 0.190999 |
| Atg14    | 0.101444 | 0.180493 | 0.191737 |
| Timm50   | 0.093699 | 0.184135 | 0.195564 |
| Fam8a1   | 0.075289 | 0.185587 | 0.19705  |
| Gm12328  | 0.303117 | 0.18594  | 0.197411 |
| Casp9    | 0.134523 | 0.186457 | 0.197946 |
| Olfm2    | 0.127657 | 0.187644 | 0.199192 |
| Tfb2m    | 0.10366  | 0.190883 | 0.202587 |
| Supt3    | 0.142184 | 0.193159 | 0.204945 |
| Gm43024  | 0.36059  | 0.193863 | 0.205648 |
| Gtf2h5   | 0.049196 | 0.194292 | 0.206089 |
| Tmem39a  | 0.128395 | 0.194911 | 0.206731 |

|           |          |          |          |
|-----------|----------|----------|----------|
| Smarcd1   | 0.069846 | 0.195001 | 0.206811 |
| Cript     | 0.055017 | 0.19542  | 0.207241 |
| Dock8     | 0.251953 | 0.195541 | 0.207354 |
| Nudt6     | 0.198701 | 0.195809 | 0.207609 |
| Lgr5      | 0.327565 | 0.196304 | 0.20809  |
| Mmadhc    | 0.077034 | 0.196607 | 0.208396 |
| Plpbbp    | 0.07797  | 0.196948 | 0.208743 |
| Polr1e    | 0.216998 | 0.19939  | 0.211271 |
| Ndrg1     | 0.038174 | 0.201071 | 0.213023 |
| Tatdn2    | 0.107457 | 0.20253  | 0.214553 |
| Vps25     | 0.379854 | 0.203409 | 0.215454 |
| Pnrc2     | 0.057704 | 0.203689 | 0.215735 |
| 2500002B  | 0.155695 | 0.204144 | 0.216202 |
| Ranbp1    | 0.046774 | 0.205462 | 0.217551 |
| Gm48872   | 0.43573  | 0.207003 | 0.219152 |
| 1110004F  | 0.044878 | 0.210839 | 0.223166 |
| Gm4468    | 0.21919  | 0.211177 | 0.223508 |
| Natd1     | 0.142168 | 0.212134 | 0.224505 |
| Arpc5l    | 0.053408 | 0.212539 | 0.224901 |
| Gm44560   | 0.365215 | 0.212689 | 0.225045 |
| Cbx2      | 0.255663 | 0.212936 | 0.22529  |
| F420014N  | 0.37412  | 0.213271 | 0.225597 |
| Asic3     | 0.237427 | 0.213491 | 0.225814 |
| Kctd21    | 0.252358 | 0.213748 | 0.226069 |
| Slc2a12   | 0.260848 | 0.215842 | 0.228252 |
| Abhd12    | 0.077765 | 0.215862 | 0.228256 |
| Gm44552   | 0.42512  | 0.217201 | 0.229656 |
| Rnps1-ps  | 0.120868 | 0.218268 | 0.230752 |
| Gm44292   | 0.244549 | 0.220654 | 0.233241 |
| Dcun1d4   | 0.118177 | 0.220884 | 0.233468 |
| Cdkn2aipn | 0.087206 | 0.22156  | 0.234166 |
| Gm38257   | 0.231427 | 0.222858 | 0.235505 |
| Ciao2a    | 0.067143 | 0.224691 | 0.237425 |
| Aimp1     | 0.046879 | 0.225223 | 0.23797  |
| Nemp1     | 0.128794 | 0.228263 | 0.241148 |
| Gm47816   | 0.190452 | 0.228654 | 0.241528 |
| Setx      | 0.058888 | 0.229011 | 0.241871 |
| A130048G  | 0.327865 | 0.229325 | 0.242184 |
| Med9      | 0.074703 | 0.231575 | 0.244527 |
| Herc2     | 0.050497 | 0.234037 | 0.247074 |
| Gm44673   | 0.343427 | 0.234385 | 0.247423 |
| Marveld2  | 0.16903  | 0.234691 | 0.247712 |
| Nelfcd    | 0.085525 | 0.235305 | 0.248325 |
| Golga3    | 0.074486 | 0.235391 | 0.248398 |
| Rft1      | 0.131174 | 0.235518 | 0.248514 |
| Ndufa1    | 0.03911  | 0.235705 | 0.248695 |
| Zfp455    | 0.301146 | 0.236799 | 0.249796 |

|           |          |          |          |
|-----------|----------|----------|----------|
| Gm13778   | 0.420969 | 0.236974 | 0.249945 |
| Gm42717   | 0.345986 | 0.237471 | 0.250448 |
| Fam221b   | 0.382651 | 0.237484 | 0.250448 |
| Ubb       | 0.024354 | 0.238112 | 0.251092 |
| Lsm8      | 0.056822 | 0.238384 | 0.251362 |
| Gm38067   | 0.322298 | 0.238404 | 0.251365 |
| Atp6v1e1  | 0.042588 | 0.238727 | 0.251688 |
| Ddx10     | 0.08603  | 0.240504 | 0.253526 |
| Cask      | 0.07913  | 0.241066 | 0.2541   |
| Alkbh2    | 0.122858 | 0.241089 | 0.254106 |
| Ajm1      | 0.284982 | 0.241268 | 0.254278 |
| Gm43460   | 0.277765 | 0.242405 | 0.255422 |
| Zfand2b   | 0.082262 | 0.242465 | 0.255467 |
| 9030407P  | 0.296437 | 0.244741 | 0.257829 |
| Gm43466   | 0.264327 | 0.245381 | 0.258466 |
| Polr3c    | 0.108403 | 0.246663 | 0.25978  |
| D17H6S53  | 0.130025 | 0.246979 | 0.260095 |
| Trim59    | 0.294095 | 0.247445 | 0.260567 |
| Hapln3    | 0.190882 | 0.250435 | 0.263605 |
| Gm45286   | 0.355466 | 0.254842 | 0.268149 |
| Tspxl2    | 0.099023 | 0.25507  | 0.26837  |
| Gm44695   | 0.338681 | 0.255314 | 0.268609 |
| Gm14326   | 0.191869 | 0.25811  | 0.271493 |
| Sec63     | 0.041753 | 0.260152 | 0.273602 |
| Teddm2    | 0.237546 | 0.261959 | 0.275464 |
| 4933412E  | 0.28619  | 0.262614 | 0.276133 |
| Gm37084   | 0.21677  | 0.263972 | 0.277542 |
| Bspry     | 0.426105 | 0.264646 | 0.278231 |
| Slc39a7   | 0.289358 | 0.269025 | 0.282774 |
| Mrtfa     | 0.130815 | 0.272971 | 0.286842 |
| Rdh10     | 0.080573 | 0.273802 | 0.287694 |
| Sumo3     | 0.041868 | 0.274955 | 0.288866 |
| Msra      | 0.104623 | 0.276445 | 0.29039  |
| Arhgap11a | 0.352322 | 0.276556 | 0.290487 |
| Zfhx4     | 0.13082  | 0.278016 | 0.29198  |
| Gm17203   | 0.332065 | 0.279548 | 0.293547 |
| Zbtb8os   | 0.086434 | 0.279677 | 0.293662 |
| Gdap2     | 0.094977 | 0.282242 | 0.296314 |
| Plekha4   | 0.259358 | 0.286087 | 0.300309 |
| Gm43290   | 0.261041 | 0.286811 | 0.301047 |
| Rrm1      | 0.081565 | 0.286976 | 0.301199 |
| Gmeb2     | 0.093426 | 0.288699 | 0.302965 |
| Zfp746    | 0.081803 | 0.290344 | 0.30467  |
| Gm45537   | 0.14645  | 0.291406 | 0.305763 |
| Gm38057   | 0.248478 | 0.291597 | 0.305942 |
| Gm37893   | 0.167156 | 0.29439  | 0.308851 |
| Rnf31     | 0.09088  | 0.294468 | 0.308911 |

|            |          |          |          |
|------------|----------|----------|----------|
| Gm44116    | 0.316985 | 0.29529  | 0.309752 |
| Med30      | 0.057358 | 0.296059 | 0.310515 |
| Mnt        | 0.086042 | 0.297428 | 0.311929 |
| Hfe        | 0.075301 | 0.298396 | 0.3129   |
| Vps33a     | 0.089346 | 0.301114 | 0.315684 |
| Gm7324     | 0.332405 | 0.302271 | 0.316874 |
| Stimate    | 0.095901 | 0.303011 | 0.317584 |
| Acp1       | 0.042284 | 0.30351  | 0.318084 |
| Apex1      | 0.111471 | 0.303755 | 0.318319 |
| Hectd2os   | 0.256135 | 0.304535 | 0.319113 |
| Ccl9       | 0.252524 | 0.30544  | 0.320017 |
| Map6       | 0.122185 | 0.307396 | 0.322022 |
| A430110C   | 0.222909 | 0.307591 | 0.322203 |
| Sephs1     | 0.082481 | 0.307695 | 0.322289 |
| Gm32856    | 0.251679 | 0.308077 | 0.322667 |
| Pop1       | 0.127375 | 0.310774 | 0.325469 |
| Lrrc14     | 0.097413 | 0.31169  | 0.326406 |
| Kcnj13     | 0.207696 | 0.311844 | 0.326544 |
| Gpr22      | 0.283108 | 0.313215 | 0.327911 |
| Ube2g2     | 0.06974  | 0.315707 | 0.330474 |
| Dcdc2b     | 0.2384   | 0.317448 | 0.33225  |
| Gm7908     | 0.279784 | 0.317757 | 0.332515 |
| Mtfr1l     | 0.049205 | 0.317769 | 0.332515 |
| Snx11      | 0.079812 | 0.31843  | 0.333184 |
| Fam53a     | 0.070335 | 0.320604 | 0.335435 |
| Pot1b      | 0.094505 | 0.320982 | 0.335807 |
| 2600002D   | 0.374392 | 0.321236 | 0.33605  |
| Fam172a    | 0.060894 | 0.321589 | 0.336375 |
| Fancc      | 0.123273 | 0.321794 | 0.336563 |
| Dscam      | 0.197046 | 0.325134 | 0.339961 |
| Gm53055    | 0.150897 | 0.326202 | 0.341055 |
| Txndc15    | 0.043516 | 0.326402 | 0.34124  |
| Tacc3      | 0.214185 | 0.327874 | 0.34273  |
| Gm16201    | 0.23576  | 0.331097 | 0.346027 |
| Fam220a    | 0.272687 | 0.331133 | 0.34604  |
| Gm10602    | 0.190481 | 0.334467 | 0.3495   |
| Gm9905     | 0.294081 | 0.337075 | 0.352128 |
| Appl2      | 0.0657   | 0.337925 | 0.35299  |
| Yes1       | 0.047406 | 0.338055 | 0.353102 |
| Gm13092    | 0.250863 | 0.33819  | 0.353218 |
| Tex14      | 0.259639 | 0.33859  | 0.353611 |
| Gm44432    | 0.129829 | 0.338822 | 0.353829 |
| Gm37553    | 0.346194 | 0.33921  | 0.354185 |
| Gm10062    | 0.19516  | 0.339712 | 0.354684 |
| Selenok-ps | 0.254239 | 0.339896 | 0.354851 |
| Ppp3ca     | 0.028469 | 0.340165 | 0.355107 |
| Fbxl21     | 0.297919 | 0.34089  | 0.355814 |

|           |          |          |          |
|-----------|----------|----------|----------|
| Antxr2    | 0.154366 | 0.34224  | 0.357199 |
| Numb      | 0.057467 | 0.34547  | 0.360545 |
| Fkrp      | 0.06832  | 0.346438 | 0.36153  |
| Zfp879    | 0.205065 | 0.347546 | 0.362661 |
| Gm43034   | 0.261684 | 0.347729 | 0.362827 |
| Pskh1     | 0.090575 | 0.34832  | 0.363418 |
| Uevld     | 0.132589 | 0.348581 | 0.363665 |
| Gid4      | 0.053977 | 0.349775 | 0.364885 |
| Nploc4    | 0.071592 | 0.352827 | 0.368007 |
| 4930515G  | 0.312415 | 0.352841 | 0.368007 |
| 1810021B  | 0.229747 | 0.354024 | 0.369189 |
| Pcdhga8   | 0.219833 | 0.354055 | 0.369196 |
| Aco1      | 0.074839 | 0.355693 | 0.370852 |
| Atmin     | 0.07764  | 0.358315 | 0.373534 |
| Nadsyn1   | 0.172849 | 0.358957 | 0.374177 |
| Syce2     | 0.107732 | 0.361582 | 0.376834 |
| Otud5     | 0.056978 | 0.361827 | 0.377063 |
| Tpp1      | 0.038366 | 0.364208 | 0.379492 |
| Wdr26     | 0.035014 | 0.364542 | 0.379814 |
| Calr3     | 0.174864 | 0.366976 | 0.382323 |
| Etohd2    | 0.172769 | 0.368654 | 0.384045 |
| Zc3h12c   | 0.084433 | 0.370961 | 0.386341 |
| Gm4742    | 0.141861 | 0.371364 | 0.386733 |
| Celf3     | 0.099195 | 0.371755 | 0.387113 |
| Prmt3     | 0.102773 | 0.374763 | 0.390191 |
| Plch1     | 0.085201 | 0.376268 | 0.391731 |
| Csnk1d    | 0.04673  | 0.37802  | 0.393501 |
| Carmil2   | 0.283759 | 0.378619 | 0.394096 |
| Mon1b     | 0.102488 | 0.381708 | 0.397229 |
| Nabp1     | 0.136048 | 0.383401 | 0.398963 |
| Surf1     | 0.04904  | 0.384684 | 0.40027  |
| C130013H  | 0.219022 | 0.386043 | 0.401657 |
| 2310010J1 | 0.064805 | 0.386523 | 0.4021   |
| E430018J2 | 0.157855 | 0.388152 | 0.403752 |
| Arhgef18  | 0.069826 | 0.388165 | 0.403752 |
| Gm33370   | 0.210629 | 0.388637 | 0.404214 |
| Tvp23a    | 0.154517 | 0.391442 | 0.407076 |
| Zfp518b   | 0.099559 | 0.394808 | 0.410491 |
| Zdhhc3    | 0.047662 | 0.39524  | 0.410883 |
| Epha7     | 0.101609 | 0.395299 | 0.410916 |
| Kpna4     | 0.037342 | 0.396488 | 0.412123 |
| Grwd1     | 0.114879 | 0.39838  | 0.414061 |
| H2ac18    | 0.132805 | 0.400136 | 0.415799 |
| Gm16192   | 0.290322 | 0.401174 | 0.416849 |
| Psmc4     | 0.036976 | 0.404681 | 0.420464 |
| Morn5     | 0.278831 | 0.40686  | 0.42264  |
| Noxo1     | 0.170849 | 0.406983 | 0.422738 |

|           |          |          |          |
|-----------|----------|----------|----------|
| Gm43652   | 0.258563 | 0.40834  | 0.424119 |
| Rars      | 0.055016 | 0.408844 | 0.424583 |
| Tmcc2     | 0.056813 | 0.411219 | 0.42699  |
| Wdr83     | 0.065496 | 0.412301 | 0.428084 |
| Gm43420   | 0.225816 | 0.415023 | 0.43088  |
| Phf11c    | 0.230945 | 0.415218 | 0.431053 |
| Vps26c    | 0.080247 | 0.415314 | 0.431123 |
| D730045B  | 0.199312 | 0.416035 | 0.431811 |
| Cfdp1     | 0.03184  | 0.418448 | 0.434286 |
| Dpp3      | 0.067867 | 0.420921 | 0.436731 |
| Csrnp3    | 0.114056 | 0.42241  | 0.438185 |
| Gm35339   | 0.219512 | 0.423322 | 0.43907  |
| Fabp5     | 0.085277 | 0.424184 | 0.439934 |
| Mrpl23-ps | 0.126596 | 0.424397 | 0.440124 |
| Mzt1      | 0.046366 | 0.42605  | 0.441777 |
| Zfp429    | 0.134408 | 0.426285 | 0.44199  |
| Pcca      | 0.056029 | 0.42686  | 0.442525 |
| Gm10250   | 0.244665 | 0.428546 | 0.444211 |
| Lym2      | 0.054816 | 0.432397 | 0.44811  |
| Rpp40     | 0.168655 | 0.432931 | 0.448632 |
| Nr2c2ap   | 0.073667 | 0.435446 | 0.451207 |
| Sgsm3     | 0.087281 | 0.435674 | 0.451412 |
| Sart1     | 0.044971 | 0.435856 | 0.45157  |
| Ubl7      | 0.052246 | 0.436026 | 0.451715 |
| Smad4     | 0.0304   | 0.436908 | 0.452566 |
| Gm12166   | 0.06687  | 0.440068 | 0.455744 |
| Ddt       | 0.0319   | 0.440136 | 0.455783 |
| Slc25a53  | 0.110867 | 0.442084 | 0.457738 |
| Chd5      | 0.087418 | 0.445399 | 0.461074 |
| Gm48838   | 0.11385  | 0.445743 | 0.461398 |
| Zfp583    | 0.170169 | 0.445806 | 0.461432 |
| Klhdc8a   | 0.103741 | 0.446932 | 0.462565 |
| Gm26826   | 0.251458 | 0.447056 | 0.462661 |
| Gde1      | 0.031747 | 0.447391 | 0.462976 |
| Klf12     | 0.040525 | 0.448637 | 0.464234 |
| Plek      | 0.122574 | 0.449953 | 0.465563 |
| Gm38235   | 0.135114 | 0.456851 | 0.472603 |
| 6720489N  | 0.231579 | 0.458457 | 0.474231 |
| Mcoln1    | 0.071919 | 0.463037 | 0.478803 |
| Kat14     | 0.064018 | 0.463459 | 0.479206 |
| Ergic2    | 0.033221 | 0.465694 | 0.481417 |
| Gm49768   | 0.223793 | 0.465905 | 0.481603 |
| Ankrd40   | 0.028959 | 0.467879 | 0.483577 |
| Ndufaf8   | 0.033423 | 0.468213 | 0.483888 |
| Socs5     | 0.039676 | 0.468621 | 0.484276 |
| Fbxl4     | 0.074725 | 0.474734 | 0.490525 |
| Gpalpp1   | 0.043895 | 0.474807 | 0.490567 |

|           |          |          |          |
|-----------|----------|----------|----------|
| Gm14419   | 0.166947 | 0.478037 | 0.493768 |
| Gm45698   | 0.18255  | 0.482116 | 0.497879 |
| Cyren     | 0.062355 | 0.482774 | 0.498523 |
| Lrp6      | 0.026289 | 0.485725 | 0.501536 |
| Serhl     | 0.051536 | 0.490499 | 0.506326 |
| Hdhd3     | 0.131626 | 0.491197 | 0.507011 |
| Acadsb    | 0.038419 | 0.494764 | 0.510588 |
| Slc25a4   | 0.016251 | 0.503863 | 0.519798 |
| Erh       | 0.033732 | 0.507273 | 0.523281 |
| Etf1      | 0.032946 | 0.509796 | 0.525811 |
| Mrps16    | 0.030827 | 0.51349  | 0.529511 |
| Tcea1-ps1 | 0.165107 | 0.51545  | 0.531423 |
| Tmco6     | 0.080356 | 0.518762 | 0.534726 |
| Nt5dc3    | 0.079052 | 0.520296 | 0.536234 |
| Sebox     | 0.071584 | 0.522891 | 0.538872 |
| Shd       | 0.140752 | 0.523425 | 0.539385 |
| Ddx49     | 0.057859 | 0.524026 | 0.539967 |
| Hbb-bs    | 0.047061 | 0.526153 | 0.542009 |
| Prpf38a   | 0.035275 | 0.528599 | 0.544491 |
| Nmnat1    | 0.080355 | 0.530719 | 0.546525 |
| Nutf2     | 0.182809 | 0.532805 | 0.548597 |
| Phpt1     | 0.035579 | 0.533407 | 0.54918  |
| Acad10    | 0.113852 | 0.533565 | 0.549305 |
| Gm38169   | 0.22178  | 0.536235 | 0.551901 |
| Crk       | 0.022551 | 0.538144 | 0.553791 |
| Rbm8a     | 0.02069  | 0.538145 | 0.553791 |
| Ndufb2    | 0.021199 | 0.539799 | 0.555455 |
| B230312C  | 0.20946  | 0.540492 | 0.55613  |
| Moxd1     | 0.204785 | 0.541064 | 0.55668  |
| Rsl24d1   | 0.038625 | 0.543581 | 0.559231 |
| Ift27     | 0.03889  | 0.545145 | 0.560763 |
| Klhl17    | 0.144435 | 0.545407 | 0.560994 |
| Gm8451    | 0.18836  | 0.545847 | 0.561408 |
| Tubgcp2   | 0.048755 | 0.546837 | 0.562311 |
| Bag6      | 0.029053 | 0.547564 | 0.563019 |
| Pum3      | 0.047713 | 0.550978 | 0.566375 |
| Col11a2   | 0.166515 | 0.551155 | 0.566518 |
| Tmem161   | 0.042312 | 0.551479 | 0.566811 |
| Vps37d    | 0.104146 | 0.55207  | 0.56738  |
| Egln1     | 0.022347 | 0.552757 | 0.568047 |
| Iba57     | 0.145651 | 0.552923 | 0.568179 |
| Ppp4r4    | 0.180871 | 0.553455 | 0.568686 |
| Gpatch3   | 0.125582 | 0.554308 | 0.569504 |
| Ostc      | 0.024523 | 0.554327 | 0.569504 |
| Mtfmt     | 0.072432 | 0.556432 | 0.571549 |
| Zbtb41    | 0.038093 | 0.558317 | 0.573446 |
| D130040H  | 0.103118 | 0.561117 | 0.576203 |



|           |          |          |          |
|-----------|----------|----------|----------|
| Mex3d     | 0.051985 | 0.562325 | 0.577405 |
| Mib1      | 0.023232 | 0.562596 | 0.577603 |
| Tdrd3     | 0.047263 | 0.5642   | 0.579131 |
| Gm44950   | 0.068974 | 0.564582 | 0.579483 |
| Cds2      | 0.022449 | 0.565334 | 0.580135 |
| Nop14     | 0.035567 | 0.56616  | 0.580944 |
| Bloc1s5   | 0.048373 | 0.568376 | 0.583177 |
| Efnb3     | 0.12286  | 0.569237 | 0.584021 |
| Itga4     | 0.045763 | 0.57324  | 0.587966 |
| Slc25a20  | 0.045562 | 0.573404 | 0.588095 |
| Slu7      | 0.026189 | 0.576743 | 0.591479 |
| Zfx       | 0.030606 | 0.579379 | 0.59406  |
| Copa      | 0.02132  | 0.580232 | 0.594812 |
| Commd7    | 0.030183 | 0.580426 | 0.59497  |
| Snrpd2    | 0.019444 | 0.582035 | 0.596497 |
| Abca2     | 0.046991 | 0.582108 | 0.596532 |
| Pcdhb20   | 0.073348 | 0.582776 | 0.597134 |
| Tom1      | 0.058129 | 0.591192 | 0.605633 |
| Srp68     | 0.032173 | 0.592729 | 0.607166 |
| Gm37115   | 0.151447 | 0.598249 | 0.612694 |
| Spindoc   | 0.055394 | 0.598422 | 0.61283  |
| Ndufa11   | 0.016693 | 0.598745 | 0.613119 |
| Axin1     | 0.042963 | 0.59964  | 0.613993 |
| Adamts13  | 0.168901 | 0.599913 | 0.614231 |
| Gm4459    | 0.151835 | 0.602303 | 0.616636 |
| Fam220a   | 0.064566 | 0.603298 | 0.617612 |
| Lactbl1   | 0.163028 | 0.604304 | 0.6186   |
| Fstl3     | 0.066713 | 0.60464  | 0.618901 |
| Anapc4    | 0.031615 | 0.606547 | 0.620811 |
| Aoc2      | 0.131963 | 0.611377 | 0.625669 |
| Rbm38     | 0.105846 | 0.61243  | 0.626704 |
| Cnep1r1   | 0.026876 | 0.61251  | 0.626743 |
| Syt3      | 0.153789 | 0.612723 | 0.626918 |
| Csnk1a1   | 0.013555 | 0.613685 | 0.627859 |
| Man2c1os  | 0.160109 | 0.614014 | 0.628153 |
| Zfp874a   | 0.064635 | 0.614513 | 0.628621 |
| Vcp-rs    | 0.133276 | 0.614729 | 0.628799 |
| Slk       | 0.018921 | 0.614831 | 0.62886  |
| 5830416l1 | 0.097942 | 0.617595 | 0.631601 |
| Gm6563    | 0.069003 | 0.618947 | 0.63294  |
| Zfp595    | 0.063028 | 0.61928  | 0.633238 |
| Nme3      | 0.116791 | 0.62023  | 0.634165 |
| Zfp521    | 0.041525 | 0.621316 | 0.635189 |
| Galnt11   | 0.03282  | 0.623535 | 0.637371 |
| Tmem258   | 0.019628 | 0.62673  | 0.640506 |
| Gm19531   | 0.153416 | 0.62928  | 0.64298  |
| Tceanc2   | 0.065692 | 0.633651 | 0.647401 |

|            |          |          |          |
|------------|----------|----------|----------|
| Slc25a17   | 0.033281 | 0.635269 | 0.648966 |
| Asap1      | 0.021086 | 0.636279 | 0.64991  |
| Enoph1     | 0.034893 | 0.636823 | 0.65042  |
| Rgmb       | 0.03653  | 0.637108 | 0.650667 |
| Cenpt      | 0.059521 | 0.64228  | 0.655771 |
| Zfp970     | 0.116402 | 0.644627 | 0.658032 |
| Otulin     | 0.031893 | 0.646647 | 0.660049 |
| Rbm19      | 0.05376  | 0.649671 | 0.663    |
| Myo9b      | 0.037292 | 0.65104  | 0.664262 |
| Tgfbr1     | 0.032744 | 0.65175  | 0.664941 |
| Slc39a9    | 0.034435 | 0.652206 | 0.665315 |
| Sfxn3      | 0.026753 | 0.653913 | 0.667011 |
| Vps11      | 0.030344 | 0.654256 | 0.667315 |
| Eif2s2     | 0.013537 | 0.656588 | 0.669648 |
| Nmnat3     | 0.077325 | 0.658088 | 0.671087 |
| Al506816   | 0.092357 | 0.662281 | 0.675225 |
| St6galnac2 | 0.129615 | 0.664904 | 0.67776  |
| Cxxc1      | 0.026283 | 0.666471 | 0.679172 |
| Atg2a      | 0.038423 | 0.668749 | 0.681447 |
| Rtca       | 0.029949 | 0.67186  | 0.684525 |
| Atxn7l2    | 0.077148 | 0.672511 | 0.685141 |
| Fdps       | 0.028564 | 0.674799 | 0.687425 |
| Ago1       | 0.026484 | 0.675184 | 0.687724 |
| Aen        | 0.040135 | 0.678581 | 0.691043 |
| Gm3604     | 0.141191 | 0.680047 | 0.692444 |
| Gm10120    | 0.087402 | 0.683803 | 0.696124 |
| Fadd       | 0.052541 | 0.685781 | 0.698043 |
| 4930539JC  | 0.0774   | 0.68981  | 0.702001 |
| Dgat2      | 0.136512 | 0.691732 | 0.703861 |
| Ttyh1      | 0.018918 | 0.693426 | 0.705441 |
| Gm37423    | 0.053297 | 0.695318 | 0.707317 |
| Gm43585    | 0.122122 | 0.695453 | 0.707406 |
| Znhit1     | 0.02111  | 0.696069 | 0.707937 |
| 1700102H   | 0.101208 | 0.699396 | 0.711224 |
| Txndc5     | 0.02944  | 0.701433 | 0.713247 |
| Gm47000    | 0.134823 | 0.701983 | 0.71371  |
| Ndufs5-ps  | 0.023494 | 0.704172 | 0.715886 |
| Neil1      | 0.070905 | 0.704698 | 0.716373 |
| Snrpert    | 0.103126 | 0.704985 | 0.716616 |
| Alg3       | 0.045379 | 0.707959 | 0.719591 |
| Gm20522    | 0.107266 | 0.711197 | 0.722685 |
| Ppfia1     | 0.019044 | 0.712219 | 0.723675 |
| Maf1       | 0.016982 | 0.712448 | 0.723812 |
| Gm43960    | 0.066516 | 0.712451 | 0.723812 |
| Btbd7      | 0.011858 | 0.713344 | 0.724578 |
| Slc35a3    | 0.025836 | 0.717686 | 0.728932 |
| Gm46436    | 0.111268 | 0.717967 | 0.729168 |

|           |          |          |          |
|-----------|----------|----------|----------|
| Tha1      | 0.100003 | 0.7188   | 0.729965 |
| Ttc27     | 0.051505 | 0.719676 | 0.730755 |
| Gm37558   | 0.046648 | 0.720609 | 0.731653 |
| Slc25a36  | 0.021345 | 0.720784 | 0.731781 |
| Tigd5     | 0.060559 | 0.72504  | 0.735903 |
| Snrpa     | 0.020063 | 0.736723 | 0.747508 |
| Snx19     | 0.023561 | 0.74116  | 0.751907 |
| Map2k1    | 0.021072 | 0.742535 | 0.753243 |
| Asic4     | 0.054898 | 0.74402  | 0.754604 |
| Ppp4c     | 0.017505 | 0.744154 | 0.754689 |
| Map2k4    | 0.020467 | 0.749592 | 0.760101 |
| Gm43609   | 0.059053 | 0.753463 | 0.763975 |
| MLxip     | 0.064519 | 0.753613 | 0.764075 |
| Kcnh7     | 0.077907 | 0.755217 | 0.765597 |
| Gm8797    | 0.044081 | 0.755332 | 0.765662 |
| 9430064I2 | 0.095368 | 0.757058 | 0.76736  |
| Gm43329   | 0.049123 | 0.758371 | 0.768639 |
| Btbd19    | 0.05548  | 0.758431 | 0.768647 |
| Wnk3      | 0.053814 | 0.764531 | 0.774777 |
| Ncaph2    | 0.019282 | 0.767785 | 0.777949 |
| Mapk1     | 0.01202  | 0.767817 | 0.777949 |
| Mcm2      | 0.04142  | 0.767968 | 0.77805  |
| Gm48870   | 0.05561  | 0.768159 | 0.77819  |
| Jpt2      | 0.051632 | 0.769194 | 0.779186 |
| C330011N  | 0.090444 | 0.769515 | 0.779458 |
| Rps4l     | 0.014715 | 0.774231 | 0.784024 |
| Fam102a   | 0.01986  | 0.775696 | 0.785454 |
| Syt9      | 0.041714 | 0.778948 | 0.78848  |
| Gm37470   | 0.044984 | 0.785169 | 0.79467  |
| Deaf1     | 0.023751 | 0.787473 | 0.79684  |
| Gm10941   | 0.056331 | 0.787547 | 0.796861 |
| Prpsap1   | 0.013832 | 0.790058 | 0.799348 |
| Gm49971   | 0.042701 | 0.79201  | 0.801214 |
| Tbc1d22b  | 0.028078 | 0.793762 | 0.802932 |
| S100a9    | 0.03427  | 0.797805 | 0.806968 |
| Hyal3     | 0.075623 | 0.798084 | 0.807196 |
| Gm20186   | 0.036646 | 0.802595 | 0.811703 |
| Gm13689   | 0.057365 | 0.804811 | 0.813834 |
| 6720475N  | 0.07546  | 0.807688 | 0.816688 |
| Gm45033   | 0.064284 | 0.808766 | 0.817724 |
| Edem2     | 0.019443 | 0.809891 | 0.818695 |
| Ippk      | 0.023193 | 0.810009 | 0.818759 |
| Ddx27     | 0.015012 | 0.813097 | 0.821825 |
| Gm14322   | 0.074483 | 0.814504 | 0.823192 |
| Zfp526    | 0.05187  | 0.816963 | 0.82562  |
| Emc2      | 0.010095 | 0.820646 | 0.829287 |
| Ppcs      | 0.023399 | 0.833374 | 0.841807 |

|          |          |          |          |
|----------|----------|----------|----------|
| Derl2    | 0.012244 | 0.834563 | 0.842952 |
| Entr1    | 0.013149 | 0.834819 | 0.843154 |
| Arf2     | 0.01173  | 0.834887 | 0.843166 |
| Usp40    | 0.015393 | 0.835671 | 0.8439   |
| Gm43778  | 0.076233 | 0.837906 | 0.846043 |
| Cyth1    | 0.012706 | 0.838867 | 0.846956 |
| Hyou1    | 0.016837 | 0.839767 | 0.847808 |
| Gm49972  | 0.026519 | 0.843833 | 0.85174  |
| Slc25a26 | 0.032961 | 0.844691 | 0.85255  |
| Hccs     | 0.014901 | 0.84669  | 0.854509 |
| Lonp1    | 0.013766 | 0.847007 | 0.854772 |
| Bcl7b    | 0.009535 | 0.8478   | 0.855514 |
| Gm30541  | 0.049486 | 0.84815  | 0.855809 |
| Ube2b    | 0.005992 | 0.852265 | 0.859788 |
| Pemt     | 0.060114 | 0.853891 | 0.86137  |
| Gm4045   | 0.040895 | 0.855749 | 0.863187 |
| Gnptab   | 0.016803 | 0.856608 | 0.863995 |
| 1700034H | 0.047333 | 0.859539 | 0.866834 |
| Asb3     | 0.016321 | 0.860185 | 0.867427 |
| Ubqln1   | 0.008778 | 0.861317 | 0.868452 |
| Rxylt1   | 0.009656 | 0.86422  | 0.871261 |
| Romo1    | 0.005336 | 0.86576  | 0.872637 |
| Mob3c    | 0.02031  | 0.866022 | 0.872843 |
| Gm5436   | 0.056578 | 0.866261 | 0.873025 |
| Pold2    | 0.016399 | 0.87338  | 0.879844 |
| 1700123M | 0.034272 | 0.873631 | 0.880038 |
| Slc35b2  | 0.012207 | 0.880749 | 0.88679  |
| Nfkbib   | 0.012628 | 0.882859 | 0.888855 |
| Lcmt1    | 0.009255 | 0.887948 | 0.893798 |
| Primpol  | 0.022521 | 0.888611 | 0.894345 |
| Gm37137  | 0.028805 | 0.888932 | 0.894608 |
| Gm9403   | 0.042899 | 0.890256 | 0.895821 |
| Zmat5    | 0.007737 | 0.894645 | 0.899935 |
| Elp5     | 0.008254 | 0.901625 | 0.906651 |
| Gm47324  | 0.036494 | 0.903914 | 0.90883  |
| Arhgap28 | 0.015632 | 0.907301 | 0.912175 |
| Prkag2   | 0.012671 | 0.907642 | 0.912396 |
| Psen1    | 0.008855 | 0.91035  | 0.915056 |
| Utp11    | 0.005153 | 0.912579 | 0.917174 |
| Cnih2    | 0.023659 | 0.913129 | 0.917665 |
| Thap7    | 0.008275 | 0.913546 | 0.917961 |
| Zfp189   | 0.014952 | 0.916427 | 0.92067  |
| Zfp934   | 0.014928 | 0.917849 | 0.921975 |
| Vps54    | 0.00583  | 0.919111 | 0.923181 |
| Slc30a4  | 0.0075   | 0.921908 | 0.925866 |
| Abhd11   | 0.009181 | 0.923085 | 0.926985 |
| S100a8   | 0.014806 | 0.924581 | 0.928301 |

|          |           |          |          |
|----------|-----------|----------|----------|
| Nol6     | 0.00957   | 0.926418 | 0.93002  |
| Mrpl3    | 0.006229  | 0.929016 | 0.932504 |
| Gpr21    | 0.020696  | 0.930931 | 0.934238 |
| Haghl    | 0.005922  | 0.934349 | 0.937543 |
| Vash1    | 0.014563  | 0.935792 | 0.938928 |
| Atp9a    | 0.00561   | 0.94075  | 0.943776 |
| Wdr24    | 0.009497  | 0.944165 | 0.947075 |
| Ndufs4   | 0.002651  | 0.945942 | 0.94873  |
| Fbxo3    | 0.002858  | 0.950771 | 0.953486 |
| Slc35e1  | 0.004947  | 0.953083 | 0.9557   |
| Susd4    | 0.008298  | 0.956686 | 0.959185 |
| Svet1    | 0.017208  | 0.957211 | 0.959646 |
| 9430034N | 0.007685  | 0.957648 | 0.960021 |
| Kcnc1    | 0.008144  | 0.958    | 0.960309 |
| Gm37674  | 0.01126   | 0.964166 | 0.966296 |
| Mitf     | 0.006761  | 0.967848 | 0.969726 |
| Crtc2    | 0.002964  | 0.968859 | 0.970674 |
| Rinl     | 0.008638  | 0.969783 | 0.971525 |
| Naxd     | 0.001425  | 0.976903 | 0.978341 |
| Gm32151  | 0.006514  | 0.97963  | 0.98094  |
| Dnajc15  | 0.001465  | 0.981747 | 0.982863 |
| Glrx5    | 0.001004  | 0.982786 | 0.983772 |
| Taf10    | 0.000865  | 0.983012 | 0.983932 |
| Gm45221  | 0.001949  | 0.984506 | 0.985361 |
| Hspb11   | 0.001076  | 0.986453 | 0.987244 |
| Ube2d1   | 0.001017  | 0.987342 | 0.988002 |
| Tep1     | 0.001155  | 0.99244  | 0.992971 |
| Gm13785  | 0.001696  | 0.995664 | 0.996063 |
| Gm44044  | 0.00065   | 0.996136 | 0.996402 |
| Oxsr1    | 8.11E-05  | 0.998961 | 0.999095 |
| Gm38170  | 0.000256  | 0.999154 | 0.999221 |
| Prr12    | 2.26E-05  | 0.999713 | 0.999713 |
| Pkd1     | -9.68E-05 | 0.998296 | 0.998496 |
| Rad18    | -0.00078  | 0.996055 | 0.996388 |
| Wdr46    | -0.00073  | 0.995031 | 0.995496 |
| Gpr84    | -0.00415  | 0.989379 | 0.989975 |
| Gm37521  | -0.0057   | 0.986875 | 0.987601 |
| Wdr4     | -0.00319  | 0.982059 | 0.983109 |
| Trip10   | -0.00141  | 0.981198 | 0.982379 |
| BC037039 | -0.00689  | 0.980176 | 0.981421 |
| Kif13b   | -0.0017   | 0.977791 | 0.979165 |
| Rnd1     | -0.00347  | 0.976537 | 0.978039 |
| Fasn     | -0.00301  | 0.974095 | 0.975659 |
| Rpain    | -0.00263  | 0.97162  | 0.973245 |
| Gm20075  | -0.00789  | 0.969838 | 0.971525 |
| Tfam     | -0.00272  | 0.966152 | 0.968092 |
| Tor1aip2 | -0.00239  | 0.966127 | 0.968092 |

|           |          |          |          |
|-----------|----------|----------|----------|
| C430039JC | -0.00837 | 0.965553 | 0.967621 |
| Atxn3     | -0.00325 | 0.963839 | 0.966033 |
| Gm2296    | -0.01428 | 0.959936 | 0.962185 |
| Izumo4    | -0.005   | 0.953744 | 0.956298 |
| Taco1os   | -0.01215 | 0.950811 | 0.953486 |
| Kcnab1    | -0.01155 | 0.945658 | 0.948509 |
| Bicd2     | -0.00358 | 0.941666 | 0.944632 |
| Cpt2      | -0.00665 | 0.938452 | 0.941533 |
| Ggnbp1    | -0.01767 | 0.933774 | 0.937028 |
| Nfkbid    | -0.02447 | 0.929509 | 0.932874 |
| Gm37718   | -0.0181  | 0.929113 | 0.932539 |
| Spg11     | -0.01282 | 0.927201 | 0.930745 |
| Wbp11     | -0.00386 | 0.925634 | 0.929296 |
| Chp1      | -0.00496 | 0.924356 | 0.928137 |
| Pink1     | -0.00352 | 0.923882 | 0.927723 |
| Otub1     | -0.00501 | 0.920833 | 0.924848 |
| Zfp652    | -0.00417 | 0.917568 | 0.921754 |
| Tnfsf13b  | -0.03541 | 0.914507 | 0.918803 |
| Bckdk     | -0.00774 | 0.914384 | 0.918741 |
| Spata2l   | -0.02611 | 0.913488 | 0.917961 |
| Retnlg    | -0.03273 | 0.912497 | 0.917152 |
| Gm45769   | -0.03279 | 0.907617 | 0.912396 |
| Tbcd      | -0.01279 | 0.902573 | 0.907543 |
| Lrrc45    | -0.01308 | 0.900808 | 0.90589  |
| U2af1l4   | -0.03273 | 0.899001 | 0.904134 |
| Fbxo42    | -0.01083 | 0.896964 | 0.902146 |
| Cbr1      | -0.00739 | 0.89631  | 0.901549 |
| Ppp4r1    | -0.00985 | 0.89333  | 0.898673 |
| Gm19605   | -0.03766 | 0.89321  | 0.898612 |
| Wdr25     | -0.02996 | 0.891182 | 0.896632 |
| Ergic1    | -0.01017 | 0.891034 | 0.896543 |
| Ncoa7     | -0.00806 | 0.889347 | 0.894966 |
| Gm44708   | -0.04478 | 0.888599 | 0.894345 |
| Scd1      | -0.04676 | 0.887918 | 0.893798 |
| 3110040N  | -0.01806 | 0.885122 | 0.891073 |
| Nap1l4    | -0.00593 | 0.880715 | 0.88679  |
| Cad       | -0.01867 | 0.877677 | 0.883816 |
| Ndufs7    | -0.00521 | 0.876214 | 0.882403 |
| Dcaf5     | -0.01091 | 0.874232 | 0.880465 |
| Cbl       | -0.00698 | 0.874072 | 0.880364 |
| Zfp87     | -0.01493 | 0.873983 | 0.880333 |
| Psmc1     | -0.00653 | 0.872061 | 0.878574 |
| Mboat7    | -0.01386 | 0.868884 | 0.875433 |
| Sphk2     | -0.01808 | 0.868679 | 0.875285 |
| Ssc5d     | -0.05469 | 0.868509 | 0.875173 |
| Ing1      | -0.00725 | 0.866797 | 0.873506 |
| Nsd1      | -0.0059  | 0.864536 | 0.871462 |

|           |          |          |          |
|-----------|----------|----------|----------|
| Gtf3c6    | -0.01059 | 0.864337 | 0.871321 |
| Kctd1     | -0.01349 | 0.861525 | 0.868603 |
| Chtf18    | -0.03908 | 0.860904 | 0.868094 |
| Cox7c-ps1 | -0.03678 | 0.858173 | 0.865515 |
| Fbxw7     | -0.00998 | 0.851683 | 0.859258 |
| Fam78a    | -0.044   | 0.849731 | 0.857347 |
| Hsd17b7   | -0.02447 | 0.843506 | 0.851468 |
| Gsto2     | -0.05524 | 0.843293 | 0.85131  |
| Cep128    | -0.03652 | 0.836023 | 0.844198 |
| Gm38104   | -0.03907 | 0.829998 | 0.838454 |
| Slc15a4   | -0.02133 | 0.82704  | 0.835523 |
| Fam160b2  | -0.01953 | 0.825512 | 0.834035 |
| Gm44045   | -0.04529 | 0.821522 | 0.83006  |
| Mcfd2     | -0.01194 | 0.821296 | 0.829888 |
| Pip4p2    | -0.02104 | 0.809665 | 0.818522 |
| Dnajb1    | -0.01184 | 0.809258 | 0.818165 |
| Cyb561d2  | -0.02857 | 0.803815 | 0.812882 |
| Smarcc1   | -0.0148  | 0.790872 | 0.800118 |
| Yy1       | -0.01029 | 0.785891 | 0.795293 |
| Txn2      | -0.01096 | 0.785403 | 0.794853 |
| Csde1     | -0.00723 | 0.78295  | 0.792478 |
| Cth       | -0.05079 | 0.778043 | 0.787617 |
| Sec31a    | -0.01326 | 0.778019 | 0.787617 |
| D73000311 | -0.02253 | 0.777204 | 0.786875 |
| Bola3     | -0.01319 | 0.776177 | 0.785888 |
| Taf1b     | -0.02493 | 0.773818 | 0.783658 |
| Rtraf     | -0.01065 | 0.772812 | 0.782692 |
| Plac8     | -0.13476 | 0.771653 | 0.781571 |
| Nudt17    | -0.05873 | 0.766387 | 0.776606 |
| Nepro     | -0.05353 | 0.754372 | 0.764793 |
| Spryd3    | -0.02396 | 0.744566 | 0.755056 |
| Pheta1    | -0.04325 | 0.743542 | 0.754171 |
| Trim13    | -0.04724 | 0.742577 | 0.753243 |
| Ints11    | -0.02698 | 0.738409 | 0.749167 |
| Hbb-bt    | -0.05776 | 0.733039 | 0.74382  |
| 2700029LC | -0.11421 | 0.730483 | 0.741276 |
| Gm4366    | -0.08451 | 0.72831  | 0.739122 |
| Slc24a4   | -0.06056 | 0.728077 | 0.738935 |
| Dcp1b     | -0.03501 | 0.723513 | 0.734403 |
| Nf2       | -0.02201 | 0.722148 | 0.733067 |
| Gm49774   | -0.10215 | 0.721287 | 0.732242 |
| Mgme1     | -0.03798 | 0.71948  | 0.730606 |
| Bcar3     | -0.02768 | 0.71335  | 0.724578 |
| Rad51ap1  | -0.07688 | 0.713088 | 0.72441  |
| Hdhd2     | -0.05813 | 0.711027 | 0.722562 |
| B230206LC | -0.05854 | 0.710649 | 0.722227 |
| Bud31     | -0.01914 | 0.710172 | 0.72179  |

|          |          |          |          |
|----------|----------|----------|----------|
| Kpnb1    | -0.01794 | 0.70149  | 0.713257 |
| Copb1    | -0.01671 | 0.699174 | 0.711047 |
| Commmd5  | -0.11665 | 0.695518 | 0.707425 |
| Npm3     | -0.02996 | 0.693106 | 0.705163 |
| Cyp4v3   | -0.04609 | 0.692937 | 0.705039 |
| Gm47092  | -0.12731 | 0.691404 | 0.703575 |
| Stn1     | -0.05104 | 0.687247 | 0.69944  |
| 4930578M | -0.04912 | 0.686188 | 0.698409 |
| Abhd17c  | -0.03867 | 0.68392  | 0.696195 |
| Zfp747   | -0.06161 | 0.682896 | 0.695248 |
| Eif2a    | -0.02399 | 0.682843 | 0.695241 |
| Hes6     | -0.03726 | 0.680049 | 0.692444 |
| Trpc4ap  | -0.02062 | 0.678297 | 0.6908   |
| Slc17a5  | -0.03806 | 0.675932 | 0.688439 |
| Tmem147  | -0.10017 | 0.674855 | 0.687435 |
| Usp5     | -0.03199 | 0.669016 | 0.681673 |
| Zfp212   | -0.03522 | 0.665613 | 0.678345 |
| Cops7a   | -0.02282 | 0.665368 | 0.67814  |
| Ammecr1l | -0.034   | 0.664987 | 0.677799 |
| Xpot     | -0.02876 | 0.663704 | 0.676583 |
| Pnpla7   | -0.07839 | 0.663373 | 0.676292 |
| Gm16386  | -0.12313 | 0.661681 | 0.674659 |
| Tm6sf2   | -0.08617 | 0.660582 | 0.673584 |
| 1700041G | -0.10793 | 0.656766 | 0.669784 |
| Armc7    | -0.07873 | 0.652165 | 0.665315 |
| Zbtb2    | -0.04258 | 0.651021 | 0.664262 |
| Smurf2   | -0.0214  | 0.650823 | 0.664131 |
| Yipf6    | -0.02945 | 0.648621 | 0.661974 |
| Spata24  | -0.08188 | 0.646857 | 0.660219 |
| Mturn    | -0.03402 | 0.644316 | 0.657759 |
| 1110025M | -0.07972 | 0.642804 | 0.656261 |
| Txn14a   | -0.02899 | 0.642112 | 0.655643 |
| Hectd1   | -0.01484 | 0.639748 | 0.653274 |
| Isy1     | -0.03893 | 0.638876 | 0.652428 |
| Rap2c    | -0.04027 | 0.635957 | 0.649625 |
| Rc3h1    | -0.0213  | 0.633816 | 0.647526 |
| Mapk4    | -0.07198 | 0.628926 | 0.642662 |
| Ints5    | -0.05303 | 0.627973 | 0.641732 |
| Gm18829  | -0.12931 | 0.624167 | 0.63793  |
| Ndufb4   | -0.02295 | 0.623755 | 0.637552 |
| Scrt1    | -0.083   | 0.623236 | 0.637108 |
| Rbfox1   | -0.15563 | 0.620515 | 0.634414 |
| 5430420F | -0.1406  | 0.615688 | 0.629694 |
| Gpatch4  | -0.05801 | 0.607721 | 0.62197  |
| Gm21988  | -0.10137 | 0.597521 | 0.61199  |
| Obi1     | -0.05929 | 0.596605 | 0.611095 |
| Tmem144  | -0.14118 | 0.590131 | 0.604587 |



|           |          |          |          |
|-----------|----------|----------|----------|
| Higd1a    | -0.01952 | 0.589388 | 0.603868 |
| 4931440P: | -0.08298 | 0.582329 | 0.596717 |
| Zfp503    | -0.04979 | 0.580745 | 0.595215 |
| 9130019O  | -0.11167 | 0.580595 | 0.595102 |
| Pofut2    | -0.03425 | 0.57992  | 0.594533 |
| Pcdhb18   | -0.10457 | 0.579678 | 0.594326 |
| Mbtps2    | -0.04676 | 0.578732 | 0.593437 |
| Prim2     | -0.0805  | 0.578718 | 0.593437 |
| Phf7      | -0.06658 | 0.57323  | 0.587966 |
| Gm37238   | -0.05365 | 0.573158 | 0.587963 |
| Ift172    | -0.0465  | 0.569641 | 0.584395 |
| 4933407K: | -0.07998 | 0.565053 | 0.579887 |
| Cactin    | -0.0483  | 0.564846 | 0.579714 |
| Zfp335    | -0.06467 | 0.563855 | 0.578816 |
| Gm43811   | -0.18783 | 0.562844 | 0.577818 |
| Lztr1     | -0.04908 | 0.562426 | 0.577469 |
| Ptrhd1    | -0.04655 | 0.560316 | 0.575421 |
| Prdm2     | -0.02673 | 0.559054 | 0.574164 |
| Nutf2-ps1 | -0.12088 | 0.55473  | 0.56984  |
| Pigu      | -0.06245 | 0.554641 | 0.569787 |
| Pja1      | -0.03254 | 0.549236 | 0.564622 |
| B130024G  | -0.07789 | 0.548972 | 0.56439  |
| Gm15937   | -0.17704 | 0.54848  | 0.563922 |
| 1110019D  | -0.13078 | 0.546545 | 0.562049 |
| Trabd     | -0.03996 | 0.546038 | 0.561566 |
| Hmgcl     | -0.04243 | 0.544809 | 0.560456 |
| Cltrn     | -0.17091 | 0.536038 | 0.551737 |
| Stambp    | -0.0442  | 0.535426 | 0.551145 |
| Lrfn3     | -0.11536 | 0.534505 | 0.550234 |
| Tamm41    | -0.08923 | 0.531209 | 0.546992 |
| Prkci     | -0.04902 | 0.530474 | 0.54631  |
| Sacs      | -0.05661 | 0.528847 | 0.544672 |
| Eola1     | -0.05274 | 0.52866  | 0.544516 |
| Rere      | -0.02681 | 0.525215 | 0.541081 |
| Mkln1os   | -0.16512 | 0.52467  | 0.540555 |
| 2310009B: | -0.04157 | 0.524526 | 0.540445 |
| Nup93     | -0.06731 | 0.52012  | 0.536089 |
| Ezh1      | -0.02942 | 0.516889 | 0.532832 |
| Pgd       | -0.04554 | 0.516004 | 0.531957 |
| Cdin1     | -0.14718 | 0.51411  | 0.530077 |
| Nhej1     | -0.15051 | 0.513726 | 0.529718 |
| 1810030O  | -0.04909 | 0.512841 | 0.528878 |
| Zfp968    | -0.18178 | 0.511933 | 0.527979 |
| A030005L: | -0.24313 | 0.50939  | 0.525428 |
| Lmtk3     | -0.13911 | 0.502009 | 0.517922 |
| Brpf3     | -0.07722 | 0.501442 | 0.517372 |
| Maml1     | -0.05387 | 0.497822 | 0.513672 |

|           |          |          |          |
|-----------|----------|----------|----------|
| Sigmar1   | -0.05924 | 0.494975 | 0.51077  |
| Gm48226   | -0.04736 | 0.494102 | 0.50994  |
| Gm45133   | -0.19727 | 0.492399 | 0.508217 |
| Pold1     | -0.07864 | 0.489315 | 0.505138 |
| Utp4      | -0.0658  | 0.488982 | 0.50483  |
| Mutyh     | -0.14769 | 0.488445 | 0.50431  |
| Arl10     | -0.09251 | 0.478436 | 0.494112 |
| Atp13a1   | -0.05996 | 0.478115 | 0.493815 |
| Gm17597   | -0.26328 | 0.477807 | 0.493565 |
| Ing5      | -0.05094 | 0.475704 | 0.491427 |
| Txlna     | -0.04444 | 0.475343 | 0.491088 |
| Dpysl5    | -0.11657 | 0.472755 | 0.488514 |
| Mapkapk2  | -0.05037 | 0.466513 | 0.482197 |
| 1700029I1 | -0.22425 | 0.464949 | 0.480681 |
| Usp42     | -0.05551 | 0.464542 | 0.480293 |
| Acaa1b    | -0.13185 | 0.462523 | 0.478305 |
| Rad50     | -0.0486  | 0.462335 | 0.478143 |
| Washc5    | -0.06357 | 0.46202  | 0.477851 |
| Arhgap4   | -0.25878 | 0.458614 | 0.47436  |
| Tmem141   | -0.07343 | 0.456511 | 0.472284 |
| Cmss1     | -0.06868 | 0.454081 | 0.469802 |
| Acat2     | -0.08859 | 0.445335 | 0.46104  |
| Hba-a2    | -0.11664 | 0.443382 | 0.45905  |
| Prcp      | -0.05662 | 0.44188  | 0.457558 |
| Tesk1     | -0.05537 | 0.438807 | 0.45447  |
| Acad12    | -0.1235  | 0.437136 | 0.452771 |
| Msto1     | -0.09289 | 0.436127 | 0.451788 |
| Ndufb4c   | -0.18201 | 0.429985 | 0.445641 |
| Gm20632   | -0.19113 | 0.429127 | 0.444783 |
| Pafah1b2  | -0.03248 | 0.426892 | 0.442528 |
| Mblac1    | -0.16796 | 0.426791 | 0.442485 |
| Naif1     | -0.14486 | 0.424448 | 0.440147 |
| Stxbp3    | -0.04322 | 0.423225 | 0.439    |
| 4833417C  | -0.16982 | 0.421495 | 0.437266 |
| Kti12     | -0.06522 | 0.421093 | 0.43688  |
| 6430573P  | -0.1988  | 0.420804 | 0.43664  |
| Ogfr      | -0.05582 | 0.420506 | 0.436361 |
| Erlin2    | -0.05051 | 0.418481 | 0.43429  |
| Nol8      | -0.06169 | 0.415826 | 0.431624 |
| 1500004A  | -0.18249 | 0.41085  | 0.426637 |
| Gm16378   | -0.22193 | 0.408386 | 0.424137 |
| Ccdc18    | -0.20236 | 0.406712 | 0.422516 |
| Slc25a51  | -0.04847 | 0.406393 | 0.422214 |
| Pygm      | -0.06691 | 0.399852 | 0.415533 |
| Cox18     | -0.08415 | 0.399481 | 0.415177 |
| Pigq      | -0.06112 | 0.395136 | 0.410803 |
| 5730414N  | -0.16321 | 0.393042 | 0.408682 |

|           |          |          |          |
|-----------|----------|----------|----------|
| Eno1b     | -0.10312 | 0.392635 | 0.408288 |
| Pus7      | -0.10058 | 0.390672 | 0.406303 |
| Elfn2     | -0.14647 | 0.386304 | 0.4019   |
| Bcap29    | -0.0609  | 0.380468 | 0.395966 |
| Klhl26    | -0.09259 | 0.379243 | 0.394718 |
| Abtb2     | -0.29189 | 0.377791 | 0.393289 |
| Ngly1     | -0.05527 | 0.373395 | 0.388794 |
| Arhgap44  | -0.17439 | 0.370691 | 0.386086 |
| Ube2z     | -0.04927 | 0.369346 | 0.384712 |
| Ankrd35   | -0.28696 | 0.36889  | 0.384264 |
| Gm37499   | -0.27479 | 0.364132 | 0.37944  |
| Psm6      | -0.04438 | 0.360229 | 0.375451 |
| Cox8a     | -0.02046 | 0.359293 | 0.374501 |
| Mospd3    | -0.08186 | 0.356127 | 0.371278 |
| Cdc42ep3  | -0.03923 | 0.354579 | 0.369716 |
| Uxt       | -0.08714 | 0.353579 | 0.368751 |
| Mcph1     | -0.18718 | 0.352484 | 0.367685 |
| Ndufa2    | -0.02503 | 0.340762 | 0.355706 |
| Gm12840   | -0.2714  | 0.338887 | 0.353872 |
| Gm50069   | -0.21118 | 0.335871 | 0.350894 |
| Zfp715    | -0.08195 | 0.334795 | 0.349795 |
| Pdap1     | -0.03336 | 0.334552 | 0.349564 |
| Gm13835   | -0.28913 | 0.330551 | 0.34548  |
| Mtx1      | -0.07339 | 0.330226 | 0.345165 |
| Gm37900   | -0.26434 | 0.326894 | 0.34173  |
| Rtraf-ps  | -0.28473 | 0.324964 | 0.339807 |
| Eif3d     | -0.04309 | 0.323376 | 0.338171 |
| Fancb     | -0.24102 | 0.322875 | 0.33767  |
| Gm43421   | -0.32517 | 0.321591 | 0.336375 |
| 241008010 | -0.128   | 0.317524 | 0.332306 |
| Slc35c1   | -0.16781 | 0.317358 | 0.332179 |
| Ctns      | -0.11205 | 0.315018 | 0.329775 |
| Gm36936   | -0.15655 | 0.313109 | 0.327823 |
| 2310011JC | -0.06598 | 0.312107 | 0.326797 |
| Hspa4     | -0.04052 | 0.307122 | 0.321757 |
| Zadh2     | -0.06955 | 0.304875 | 0.319448 |
| Ulk1      | -0.06807 | 0.302678 | 0.317257 |
| Gm37186   | -0.20727 | 0.302647 | 0.317246 |
| Prr13     | -0.04751 | 0.300869 | 0.315449 |
| Ints9     | -0.08351 | 0.298653 | 0.313147 |
| Pik3ap1   | -0.33719 | 0.297987 | 0.312493 |
| Gm28151   | -0.15697 | 0.296007 | 0.310481 |
| Pik3cb    | -0.09978 | 0.287943 | 0.302193 |
| Ubl4a     | -0.07598 | 0.285292 | 0.299495 |
| Cd27      | -0.28867 | 0.282207 | 0.296297 |
| Ptges3    | -0.03277 | 0.278573 | 0.292544 |
| Gm44699   | -0.2408  | 0.277351 | 0.291302 |

|           |          |          |          |
|-----------|----------|----------|----------|
| C79130    | -0.28888 | 0.276159 | 0.290111 |
| Ptpn3     | -0.36105 | 0.273968 | 0.287849 |
| Igf2      | -0.3618  | 0.27282  | 0.286704 |
| Prr7      | -0.16307 | 0.272338 | 0.286217 |
| Ppp2cb    | -0.08066 | 0.271762 | 0.285632 |
| Ier3      | -0.03764 | 0.267738 | 0.281441 |
| Zfp804a   | -0.30861 | 0.265942 | 0.279573 |
| Tbc1d25   | -0.22625 | 0.261787 | 0.275302 |
| Gm20634   | -0.29788 | 0.259804 | 0.273255 |
| Rps2      | -0.02929 | 0.257214 | 0.270569 |
| Clptm1    | -0.05535 | 0.255841 | 0.269144 |
| Neu3      | -0.23207 | 0.254067 | 0.267352 |
| Hmox2     | -0.06573 | 0.253543 | 0.26682  |
| Sar1a     | -0.05107 | 0.252429 | 0.265666 |
| Timm10b   | -0.05147 | 0.250809 | 0.263979 |
| Gm43330   | -0.32447 | 0.250431 | 0.263605 |
| Gne       | -0.10159 | 0.249541 | 0.262701 |
| Golga7    | -0.05344 | 0.249368 | 0.262537 |
| Pnkp      | -0.09562 | 0.248597 | 0.261744 |
| Gm48375   | -0.19989 | 0.248152 | 0.261294 |
| Spopl     | -0.07546 | 0.245742 | 0.258829 |
| Traip     | -0.33124 | 0.245262 | 0.25836  |
| Trappc4   | -0.04569 | 0.242671 | 0.255666 |
| Pak1      | -0.22103 | 0.241881 | 0.254888 |
| Dguok     | -0.05795 | 0.241351 | 0.254347 |
| 4921524J1 | -0.05955 | 0.239646 | 0.252639 |
| Ndufb6    | -0.04787 | 0.236965 | 0.249945 |
| Tubgcp3   | -0.09498 | 0.23635  | 0.24934  |
| Ccdc160   | -0.23042 | 0.235948 | 0.248934 |
| Amigo1    | -0.15591 | 0.234949 | 0.247967 |
| Snrpb     | -0.03616 | 0.23448  | 0.247506 |
| Stom      | -0.05414 | 0.233909 | 0.246956 |
| A530064N  | -0.4239  | 0.231893 | 0.244845 |
| Usp39     | -0.09798 | 0.231522 | 0.244488 |
| Gm43848   | -0.21445 | 0.228894 | 0.241764 |
| Poglut2   | -0.16053 | 0.228539 | 0.241423 |
| Ankfy1    | -0.07749 | 0.225514 | 0.238261 |
| 1810024B1 | -0.19168 | 0.222061 | 0.234679 |
| B4galnt1  | -0.41712 | 0.220316 | 0.232901 |
| Mon2      | -0.06527 | 0.217766 | 0.230237 |
| Ddx3y     | -0.04934 | 0.215666 | 0.228081 |
| Mccc2     | -0.14941 | 0.213018 | 0.225345 |
| Tmem167l  | -0.08928 | 0.212995 | 0.225337 |
| Smim19    | -0.07996 | 0.212494 | 0.22487  |
| Galns     | -0.29034 | 0.210394 | 0.22271  |
| Gm48086   | -0.37075 | 0.20744  | 0.219599 |
| Unc5d     | -0.32779 | 0.206085 | 0.218196 |

|           |          |          |          |
|-----------|----------|----------|----------|
| Vti1a     | -0.09203 | 0.2047   | 0.21676  |
| B3gnt1l   | -0.26978 | 0.204418 | 0.216477 |
| Ilkap     | -0.0598  | 0.20256  | 0.21457  |
| Armcs5    | -0.10797 | 0.20083  | 0.212782 |
| Cdc42bpa  | -0.04556 | 0.199279 | 0.211169 |
| Sel1l     | -0.05621 | 0.198645 | 0.210512 |
| Mapk1ip1l | -0.06937 | 0.197457 | 0.209267 |
| 5730409E  | -0.11128 | 0.196026 | 0.20781  |
| Ube2v1    | -0.19526 | 0.195879 | 0.207669 |
| Tmem50b   | -0.08416 | 0.195625 | 0.207429 |
| Grk6      | -0.11423 | 0.193436 | 0.205209 |
| Dynlt1f   | -0.14346 | 0.193331 | 0.205113 |
| Mcrip1    | -0.05716 | 0.192924 | 0.20471  |
| Rab3il1   | -0.22531 | 0.191782 | 0.203512 |
| Fndc10    | -0.17745 | 0.191018 | 0.202716 |
| Wdr81     | -0.19445 | 0.189424 | 0.201053 |
| Scmh1     | -0.07057 | 0.188278 | 0.199851 |
| Gm42551   | -0.27218 | 0.184491 | 0.195901 |
| Rnf216    | -0.06891 | 0.184446 | 0.195867 |
| Dclre1b   | -0.19691 | 0.184298 | 0.195723 |
| Csnk2a1-p | -0.2216  | 0.182679 | 0.194031 |
| Ninl      | -0.32695 | 0.182239 | 0.193579 |
| Polr2h    | -0.10609 | 0.180277 | 0.191522 |
| Tbc1d13   | -0.12688 | 0.178849 | 0.190058 |
| Polm      | -0.28644 | 0.178057 | 0.189229 |
| Pitrm1    | -0.13914 | 0.177384 | 0.188542 |
| Polr3h    | -0.12225 | 0.176755 | 0.187887 |
| Sae1      | -0.07718 | 0.176199 | 0.187322 |
| Dennd6a   | -0.07287 | 0.175024 | 0.186085 |
| Tipin     | -0.08692 | 0.171623 | 0.182509 |
| Rp2       | -0.13664 | 0.171295 | 0.182173 |
| Pacs2     | -0.09851 | 0.171133 | 0.182013 |
| Gm43254   | -0.32055 | 0.170576 | 0.181459 |
| Slc25a40  | -0.13631 | 0.170531 | 0.181424 |
| Gsr       | -0.1013  | 0.169816 | 0.18069  |
| Gatad2a   | -0.06357 | 0.169487 | 0.180353 |
| Vps35     | -0.05834 | 0.168969 | 0.179827 |
| Dancr     | -0.16183 | 0.168906 | 0.179772 |
| Bag5      | -0.06324 | 0.168815 | 0.179689 |
| Dnlz      | -0.09037 | 0.167314 | 0.178103 |
| Tmem248   | -0.09226 | 0.16687  | 0.177644 |
| Trp53inp1 | -0.09038 | 0.166153 | 0.176892 |
| Ap5b1     | -0.42122 | 0.165684 | 0.176406 |
| Gm43331   | -0.29757 | 0.163204 | 0.173827 |
| Usf1      | -0.10113 | 0.16317  | 0.173803 |
| Rpa1      | -0.10667 | 0.162437 | 0.173047 |
| Phb       | -0.1132  | 0.161258 | 0.171816 |

|          |          |          |          |
|----------|----------|----------|----------|
| AV099323 | -0.39257 | 0.161097 | 0.171657 |
| 4633401B | -0.28419 | 0.160516 | 0.171062 |
| Ubr7     | -0.09235 | 0.158898 | 0.169361 |
| Mocs2    | -0.07162 | 0.158247 | 0.168691 |
| Rnf149   | -0.16081 | 0.154008 | 0.164313 |
| Zfp951   | -0.32198 | 0.152818 | 0.163067 |
| Cmas     | -0.09474 | 0.151988 | 0.162204 |
| Snap47   | -0.09128 | 0.150591 | 0.160759 |
| Ankrd9   | -0.21397 | 0.150035 | 0.160178 |
| Fan1     | -0.25583 | 0.149845 | 0.159986 |
| Gm38357  | -0.3271  | 0.149334 | 0.159452 |
| Gins4    | -0.11026 | 0.149147 | 0.159275 |
| Psmb2    | -0.05228 | 0.148744 | 0.158855 |
| Rbak     | -0.1584  | 0.145782 | 0.155759 |
| Larp7    | -0.08686 | 0.14554  | 0.155511 |
| Sdad1    | -0.14144 | 0.144946 | 0.154899 |
| Traf4    | -0.27462 | 0.140205 | 0.149865 |
| Washc4   | -0.08901 | 0.139859 | 0.149505 |
| R74862   | -0.22908 | 0.138549 | 0.148136 |
| Gm4792   | -0.12315 | 0.138237 | 0.147813 |
| Gm37653  | -0.33077 | 0.137276 | 0.146817 |
| Gm37274  | -0.21125 | 0.135524 | 0.144995 |
| Rsl1     | -0.26011 | 0.134803 | 0.144235 |
| Pgap2    | -0.1121  | 0.13453  | 0.143953 |
| Lmtk2    | -0.13558 | 0.132919 | 0.142259 |
| Tdp1     | -0.19087 | 0.13189  | 0.141168 |
| Bub3     | -0.06427 | 0.131245 | 0.140488 |
| Micos10  | -0.04452 | 0.130666 | 0.139878 |
| Nudt16l1 | -0.10961 | 0.128307 | 0.137421 |
| C030015A | -0.42981 | 0.127844 | 0.136935 |
| Inha     | -0.44176 | 0.127555 | 0.136635 |
| Amdhd2   | -0.18185 | 0.125668 | 0.134662 |
| Ln timer | -0.33048 | 0.125262 | 0.134246 |
| Ptma-ps2 | -0.41445 | 0.125224 | 0.134215 |
| Coasy    | -0.15249 | 0.124858 | 0.133833 |
| Mrpl13   | -0.07762 | 0.123512 | 0.132418 |
| Sun1     | -0.0803  | 0.122893 | 0.131793 |
| Use1     | -0.05206 | 0.122301 | 0.131167 |
| Gm10030  | -0.26621 | 0.12124  | 0.130047 |
| Zfyve1   | -0.15117 | 0.120745 | 0.129525 |
| Tubb5    | -0.04186 | 0.120292 | 0.129049 |
| Rragc    | -0.08909 | 0.119834 | 0.128577 |
| Srbd1    | -0.14216 | 0.119071 | 0.127776 |
| Naa80    | -0.11899 | 0.116914 | 0.125515 |
| Nucks1   | -0.04435 | 0.116848 | 0.125455 |
| Tmem198l | -0.17014 | 0.115778 | 0.124323 |
| Ralyl    | -0.38471 | 0.115201 | 0.12372  |

|           |          |          |          |
|-----------|----------|----------|----------|
| BC004004  | -0.0874  | 0.11408  | 0.122535 |
| Gm43313   | -0.27445 | 0.114003 | 0.12246  |
| Nsdhl     | -0.18337 | 0.113969 | 0.122433 |
| Wdr45b    | -0.0894  | 0.110915 | 0.119203 |
| Trim7     | -0.40466 | 0.110164 | 0.118421 |
| Hmgcs1    | -0.08227 | 0.109875 | 0.118119 |
| Tstd3     | -0.26928 | 0.109515 | 0.117749 |
| Arap1     | -0.18016 | 0.108154 | 0.116327 |
| Padi2     | -0.22607 | 0.10751  | 0.11566  |
| Atp5g2    | -0.15573 | 0.107417 | 0.115576 |
| Bloc1s6   | -0.12168 | 0.107288 | 0.115446 |
| Med12     | -0.2144  | 0.106527 | 0.11466  |
| Gm8692    | -0.41041 | 0.104054 | 0.112055 |
| Lima1     | -0.05827 | 0.102649 | 0.110589 |
| Gm15672   | -0.36277 | 0.102473 | 0.110416 |
| Paox      | -0.29144 | 0.1019   | 0.109806 |
| C230062I1 | -0.36858 | 0.101565 | 0.109466 |
| Gm43817   | -0.36016 | 0.100923 | 0.108793 |
| Strip1    | -0.11407 | 0.100536 | 0.108383 |
| Haus7     | -0.15326 | 0.100435 | 0.108282 |
| Gm30124   | -0.50599 | 0.099595 | 0.107408 |
| Tmem81    | -0.35102 | 0.098548 | 0.106301 |
| Nlrc3     | -0.43697 | 0.097214 | 0.104878 |
| Lamtor1   | -0.07133 | 0.096704 | 0.10435  |
| Rbpj      | -0.09003 | 0.093694 | 0.101123 |
| Ube2q2    | -0.11412 | 0.093258 | 0.100668 |
| Samm50    | -0.09022 | 0.093185 | 0.100597 |
| Tsc22d2   | -0.07555 | 0.092644 | 0.100041 |
| Gm43328   | -0.33422 | 0.092435 | 0.099822 |
| Gramd1a   | -0.13592 | 0.092109 | 0.099477 |
| Znrf1     | -0.07227 | 0.091804 | 0.099155 |
| Eif3j1    | -0.08087 | 0.090939 | 0.098228 |
| Atg101    | -0.1019  | 0.090848 | 0.098137 |
| Gm7160    | -0.34617 | 0.090485 | 0.097758 |
| 6330562C  | -0.52672 | 0.088971 | 0.096179 |
| Gm7868    | -0.44354 | 0.087844 | 0.094988 |
| Rab8a     | -0.09371 | 0.087024 | 0.094114 |
| Exoc3l    | -0.36638 | 0.086307 | 0.093352 |
| Slc37a3   | -0.15871 | 0.08623  | 0.093283 |
| Cbfb      | -0.11843 | 0.085309 | 0.092307 |
| Dusp28    | -0.15612 | 0.084978 | 0.091955 |
| Kif3c     | -0.16963 | 0.084131 | 0.091052 |
| Noct      | -0.17218 | 0.083006 | 0.08984  |
| Gm37783   | -0.2173  | 0.08266  | 0.089492 |
| Gm48682   | -0.48312 | 0.08251  | 0.089342 |
| 4833413G  | -0.4407  | 0.081988 | 0.088791 |
| Fam122b   | -0.3266  | 0.081432 | 0.088207 |

|          |          |          |          |
|----------|----------|----------|----------|
| Pcbp1    | -0.0528  | 0.081205 | 0.087967 |
| Nfic     | -0.05212 | 0.080491 | 0.087207 |
| Ehmt2    | -0.10141 | 0.080241 | 0.086942 |
| Zfp512b  | -0.15925 | 0.079858 | 0.086534 |
| Gm5644   | -0.4207  | 0.079386 | 0.086047 |
| Gopc     | -0.13028 | 0.078805 | 0.085423 |
| Mif-ps4  | -0.44074 | 0.078587 | 0.0852   |
| Tubd1    | -0.31573 | 0.077798 | 0.084369 |
| Ldhd     | -0.43821 | 0.077678 | 0.084245 |
| Slc35a5  | -0.13576 | 0.077334 | 0.083878 |
| Smc1a    | -0.06091 | 0.076651 | 0.083173 |
| Srek1ip1 | -0.10563 | 0.074873 | 0.08125  |
| Sap18b   | -0.37875 | 0.071797 | 0.07794  |
| Gm37420  | -0.26933 | 0.071482 | 0.077603 |
| Gm43677  | -0.54914 | 0.071    | 0.077086 |
| Rexo5    | -0.49392 | 0.069798 | 0.075787 |
| Cacna1s  | -0.52072 | 0.069643 | 0.075624 |
| Frg1     | -0.09762 | 0.068597 | 0.074509 |
| Gm9887   | -0.31905 | 0.067389 | 0.073208 |
| Rnf138   | -0.11363 | 0.067041 | 0.072835 |
| Ppme1    | -0.09665 | 0.06699  | 0.072785 |
| Hsph1    | -0.13069 | 0.066978 | 0.072777 |
| Osbp11   | -0.13805 | 0.066283 | 0.072033 |
| Mcm4     | -0.19884 | 0.066226 | 0.071976 |
| Tbx6     | -0.57549 | 0.065738 | 0.07145  |
| Mir22hg  | -0.22311 | 0.063998 | 0.069579 |
| Dmpk     | -0.22064 | 0.063397 | 0.068946 |
| Gm44667  | -0.20029 | 0.063213 | 0.068766 |
| Tpk1     | -0.32668 | 0.063205 | 0.068762 |
| Gm11914  | -0.44176 | 0.060848 | 0.066227 |
| Slc2a13  | -0.61325 | 0.058904 | 0.064148 |
| Eif2ak1  | -0.16317 | 0.058391 | 0.063609 |
| Gm20536  | -0.39216 | 0.058088 | 0.063292 |
| Kdm6a    | -0.10501 | 0.057627 | 0.062798 |
| Lag3     | -0.39242 | 0.056709 | 0.061821 |
| Tbc1d2   | -0.35053 | 0.054737 | 0.059705 |
| Pdcd5-ps | -0.53301 | 0.054512 | 0.05947  |
| Tmem86a  | -0.22231 | 0.053197 | 0.058068 |
| Stx18    | -0.16879 | 0.053119 | 0.057992 |
| Kcnab3   | -0.61394 | 0.05308  | 0.057958 |
| Vwa8     | -0.17173 | 0.053035 | 0.057913 |
| Abcd2    | -0.21924 | 0.052424 | 0.057253 |
| Creld1   | -0.15472 | 0.052249 | 0.057067 |
| Rnf141   | -0.14874 | 0.051503 | 0.056268 |
| Oxr1     | -0.09032 | 0.050227 | 0.054883 |
| Vps13a   | -0.11308 | 0.049817 | 0.054439 |
| Fchsd2   | -0.11787 | 0.049638 | 0.054247 |



|          |          |          |          |
|----------|----------|----------|----------|
| Adcy2    | -0.48451 | 0.049436 | 0.054034 |
| Naa38    | -0.08746 | 0.04938  | 0.053977 |
| Ugcg     | -0.13332 | 0.048613 | 0.053149 |
| Rlim     | -0.10984 | 0.048569 | 0.053105 |
| Myo18a   | -0.10302 | 0.048336 | 0.052855 |
| Cdc27    | -0.14483 | 0.048187 | 0.052696 |
| Gm12350  | -0.2746  | 0.047812 | 0.052293 |
| Gm15510  | -0.49341 | 0.047795 | 0.052278 |
| Rnaseh2a | -0.19565 | 0.047451 | 0.05191  |
| 2610035D | -0.28828 | 0.047122 | 0.051553 |
| Gm37465  | -0.46423 | 0.046404 | 0.050776 |
| Cux1     | -0.08461 | 0.046318 | 0.050689 |
| Hacl1    | -0.2597  | 0.045741 | 0.050068 |
| Acot7    | -0.1925  | 0.045165 | 0.049464 |
| Bex1     | -0.20044 | 0.045006 | 0.049292 |
| Man2c1   | -0.18763 | 0.044922 | 0.049211 |
| Akr7a5   | -0.15473 | 0.04439  | 0.04865  |
| Gm43481  | -0.27418 | 0.044384 | 0.048647 |
| Parp16   | -0.31282 | 0.044343 | 0.048606 |
| Gm38034  | -0.46578 | 0.044136 | 0.048393 |
| Pdzd11   | -0.1226  | 0.044065 | 0.048322 |
| Isoc2b   | -0.42629 | 0.043817 | 0.048054 |
| Zfp703   | -0.13828 | 0.043691 | 0.047922 |
| Ramac    | -0.09308 | 0.043507 | 0.047728 |
| Iars2    | -0.12673 | 0.043259 | 0.047462 |
| Pola2    | -0.22487 | 0.042943 | 0.047119 |
| Gm4285   | -0.41607 | 0.042888 | 0.047062 |
| Rab34    | -0.18811 | 0.042357 | 0.046483 |
| Atp6v1g2 | -0.26343 | 0.042208 | 0.046326 |
| Ntmt1    | -0.19672 | 0.041948 | 0.046045 |
| Simc1    | -0.32588 | 0.04187  | 0.045962 |
| Hnrnpa0  | -0.06518 | 0.041745 | 0.045828 |
| Phf23    | -0.12814 | 0.041607 | 0.04568  |
| Atrnl1   | -0.17199 | 0.041426 | 0.045492 |
| Gm49980  | -0.31118 | 0.041397 | 0.045462 |
| Lrch2    | -0.29753 | 0.040727 | 0.044736 |
| Tmem185l | -0.22702 | 0.040213 | 0.044188 |
| Tcte2    | -0.41004 | 0.039882 | 0.043837 |
| Pisd-ps1 | -0.50744 | 0.039552 | 0.043481 |
| Mrrf     | -0.20514 | 0.039505 | 0.043436 |
| Rai1     | -0.1421  | 0.038863 | 0.04274  |
| Trim32   | -0.19946 | 0.038525 | 0.042378 |
| Spg20    | -0.14238 | 0.038045 | 0.041858 |
| Adamtsl5 | -0.24982 | 0.037739 | 0.041531 |
| Lsm5     | -0.10526 | 0.037482 | 0.041251 |
| Tmem178  | -0.65418 | 0.037045 | 0.040779 |
| Yipf4    | -0.08279 | 0.036541 | 0.040233 |

|          |          |          |          |
|----------|----------|----------|----------|
| Gm37660  | -0.5189  | 0.036244 | 0.039912 |
| Gls2     | -0.70661 | 0.035854 | 0.039491 |
| Pet100   | -0.10574 | 0.035785 | 0.039419 |
| Ccl27a   | -0.17251 | 0.035712 | 0.039341 |
| Eif3j2   | -0.56633 | 0.035511 | 0.039128 |
| Commd4   | -0.12718 | 0.035325 | 0.038929 |
| Myo5b    | -0.39938 | 0.035192 | 0.03879  |
| Gm45495  | -0.41214 | 0.034826 | 0.03839  |
| Trak1    | -0.09911 | 0.034564 | 0.038109 |
| Slc38a1  | -0.16173 | 0.034551 | 0.038099 |
| H4c8     | -0.24046 | 0.034177 | 0.037691 |
| Zmynd11  | -0.07015 | 0.033217 | 0.036657 |
| Klf9     | -0.0608  | 0.033099 | 0.036538 |
| Arpin    | -0.23801 | 0.033054 | 0.036491 |
| Bloc1s3  | -0.3164  | 0.032827 | 0.036246 |
| Tef      | -0.10056 | 0.032545 | 0.035947 |
| Mocs1    | -0.56827 | 0.031711 | 0.035039 |
| Rnf7     | -0.07194 | 0.031243 | 0.034532 |
| Rab4b    | -0.48788 | 0.031194 | 0.034481 |
| Dpy19l4  | -0.13561 | 0.031187 | 0.034475 |
| Sec11a   | -0.10234 | 0.030657 | 0.033905 |
| Tmed4    | -0.10971 | 0.030631 | 0.033878 |
| Mzt2     | -0.18439 | 0.030383 | 0.033611 |
| Isoc2a   | -0.34517 | 0.030351 | 0.03358  |
| Fam118b  | -0.1574  | 0.030135 | 0.033346 |
| Gm37183  | -0.35206 | 0.029864 | 0.033052 |
| Syn1     | -0.47864 | 0.029775 | 0.032958 |
| Lrrtm2   | -0.62983 | 0.029761 | 0.032947 |
| Gm19327  | -0.72042 | 0.029682 | 0.032862 |
| mt-Tw    | -0.36836 | 0.029477 | 0.03264  |
| Arntl2   | -0.42293 | 0.02943  | 0.03259  |
| Peg10    | -0.77321 | 0.029216 | 0.032356 |
| Usp1     | -0.12188 | 0.028656 | 0.031745 |
| Ube2q1   | -0.10355 | 0.028224 | 0.031278 |
| Jph1     | -0.62429 | 0.028132 | 0.031179 |
| Mipol1   | -0.25261 | 0.027917 | 0.03095  |
| Prkaca   | -0.13865 | 0.027501 | 0.030496 |
| Ctdnep1  | -0.12043 | 0.027501 | 0.030496 |
| Nek3     | -0.45436 | 0.027189 | 0.030156 |
| 6030400A | -0.49417 | 0.026971 | 0.02992  |
| Dlg3     | -0.25873 | 0.026789 | 0.029723 |
| Gm16751  | -0.55497 | 0.026646 | 0.029569 |
| AI987944 | -0.20209 | 0.026378 | 0.029276 |
| Gm4013   | -0.41793 | 0.026131 | 0.029011 |
| Pigp     | -0.11802 | 0.026117 | 0.028997 |
| Smim12   | -0.12327 | 0.025924 | 0.028785 |
| AI837181 | -0.13776 | 0.025869 | 0.028726 |

|           |          |          |          |
|-----------|----------|----------|----------|
| Dele1     | -0.14815 | 0.025288 | 0.028095 |
| Avl9      | -0.11375 | 0.025207 | 0.028008 |
| Ubr1      | -0.10815 | 0.02494  | 0.027719 |
| B430203G  | -0.68123 | 0.02487  | 0.027643 |
| Msrb1     | -0.14285 | 0.024508 | 0.027246 |
| Tyw5      | -0.18799 | 0.023939 | 0.026624 |
| Fam98c    | -0.14215 | 0.023881 | 0.026562 |
| Wdr11     | -0.17161 | 0.023842 | 0.02652  |
| Pex5      | -0.21104 | 0.023805 | 0.026483 |
| Gm6222    | -0.58872 | 0.023735 | 0.02641  |
| Slc30a7   | -0.19125 | 0.023354 | 0.025989 |
| Bop1      | -0.24646 | 0.02324  | 0.025866 |
| 1300002E: | -0.14656 | 0.022986 | 0.025595 |
| Atp5d     | -0.06365 | 0.022898 | 0.025504 |
| Slc35b3   | -0.20823 | 0.022836 | 0.025437 |
| Fhod1     | -0.21766 | 0.022776 | 0.025374 |
| Spag5     | -0.69372 | 0.022251 | 0.024802 |
| Fhit      | -0.61475 | 0.021428 | 0.023901 |
| 9430041J1 | -0.56495 | 0.021188 | 0.023639 |
| mt-Tk     | -0.63017 | 0.020875 | 0.023291 |
| Inpp5k    | -0.13898 | 0.020034 | 0.022359 |
| Tcof1     | -0.15768 | 0.019831 | 0.022136 |
| Ttc7      | -0.41824 | 0.019676 | 0.021967 |
| 9530068E: | -0.12891 | 0.019657 | 0.021947 |
| Invs      | -0.25877 | 0.01933  | 0.021585 |
| Rpl7l1    | -0.12081 | 0.018826 | 0.021033 |
| 7SK-197   | -0.39326 | 0.018688 | 0.020884 |
| Gm44829   | -0.37372 | 0.018612 | 0.0208   |
| Gprin2    | -0.65325 | 0.018472 | 0.020649 |
| B230206I0 | -0.63666 | 0.01829  | 0.020451 |
| Prelid3a  | -0.59879 | 0.018185 | 0.020337 |
| Dpysl4    | -0.18576 | 0.01785  | 0.019966 |
| Dcaf12    | -0.16426 | 0.017654 | 0.01975  |
| Prr36     | -0.81922 | 0.017287 | 0.019348 |
| Setbp1    | -0.21636 | 0.017112 | 0.019154 |
| Tsc2      | -0.17205 | 0.016563 | 0.018544 |
| Phf13     | -0.2744  | 0.016474 | 0.018449 |
| Snhg4     | -0.26121 | 0.01621  | 0.018155 |
| Manf      | -0.09956 | 0.016139 | 0.018078 |
| Plcxd1    | -0.82035 | 0.015923 | 0.017841 |
| Gm45767   | -0.39131 | 0.015904 | 0.017821 |
| Epha8     | -0.80954 | 0.015789 | 0.017694 |
| Nans      | -0.21784 | 0.015712 | 0.017609 |
| Psmb5     | -0.09481 | 0.01563  | 0.017522 |
| Hcfc1     | -0.13977 | 0.01551  | 0.017392 |
| Eaf2      | -0.50785 | 0.015183 | 0.017032 |
| Uqcrc2    | -0.09011 | 0.015179 | 0.01703  |

|           |          |          |          |
|-----------|----------|----------|----------|
| Rasa1     | -0.1111  | 0.015179 | 0.01703  |
| Eif2b5    | -0.15274 | 0.014883 | 0.016702 |
| 5430403G  | -0.42087 | 0.014859 | 0.016676 |
| Dpp9      | -0.18957 | 0.0147   | 0.016498 |
| Wdr45     | -0.22395 | 0.014455 | 0.016231 |
| Uba5      | -0.14846 | 0.014338 | 0.016103 |
| Zbtb10    | -0.17532 | 0.014296 | 0.016057 |
| Dusp10    | -0.54024 | 0.014274 | 0.016034 |
| Pa2g4     | -0.11245 | 0.014101 | 0.015841 |
| Rab14     | -0.06611 | 0.014069 | 0.015807 |
| Flywch1   | -0.14047 | 0.013877 | 0.015594 |
| Zfp995    | -0.56826 | 0.01387  | 0.015588 |
| Mea1      | -0.13377 | 0.013802 | 0.015513 |
| Rad21     | -0.09109 | 0.013547 | 0.015229 |
| Gpr62     | -0.79786 | 0.013357 | 0.015021 |
| GlrX      | -0.23991 | 0.013096 | 0.014733 |
| Lat2      | -0.654   | 0.013081 | 0.014716 |
| Lix1      | -0.80388 | 0.013068 | 0.014703 |
| B930086LC | -0.27443 | 0.012834 | 0.014444 |
| Brap      | -0.17508 | 0.0128   | 0.014407 |
| Dctn4     | -0.10564 | 0.012524 | 0.014105 |
| Pcdhga5   | -0.46315 | 0.012342 | 0.013901 |
| Sin3b     | -0.11216 | 0.012297 | 0.013851 |
| Six1      | -0.34292 | 0.012216 | 0.013762 |
| Mtpap     | -0.15701 | 0.01202  | 0.013545 |
| Lgals8    | -0.14807 | 0.011887 | 0.0134   |
| Tle5      | -0.06518 | 0.011783 | 0.013284 |
| Calr      | -0.07527 | 0.011596 | 0.013078 |
| Ankrd10   | -0.14135 | 0.0115   | 0.012971 |
| Cmpk1     | -0.11188 | 0.011353 | 0.012806 |
| Shisal1   | -0.31041 | 0.011328 | 0.01278  |
| Hspa12a   | -0.20067 | 0.011255 | 0.012699 |
| Gm15708   | -0.75102 | 0.01125  | 0.012694 |
| Gm49417   | -0.36713 | 0.011073 | 0.0125   |
| Lmbrd1    | -0.1004  | 0.010751 | 0.01214  |
| Dnajc14   | -0.16464 | 0.010722 | 0.012109 |
| Rtcb      | -0.12389 | 0.010498 | 0.011857 |
| Ksr1      | -0.22128 | 0.010391 | 0.011738 |
| Gm19196   | -0.67735 | 0.010314 | 0.011652 |
| Cep72     | -0.70473 | 0.010199 | 0.011524 |
| Pdk1      | -0.22823 | 0.010173 | 0.011495 |
| Dnpep     | -0.13229 | 0.010145 | 0.011466 |
| Ung       | -0.71971 | 0.010096 | 0.01141  |
| Gabrr3    | -0.68844 | 0.01009  | 0.011405 |
| Cpeb2     | -0.24015 | 0.00997  | 0.011272 |
| Gstm4     | -0.58145 | 0.009953 | 0.011253 |
| Brdt      | -0.45155 | 0.009667 | 0.010935 |

|           |          |          |          |
|-----------|----------|----------|----------|
| 1110059E: | -0.1697  | 0.009521 | 0.010772 |
| Tyk2      | -0.29705 | 0.009477 | 0.010723 |
| Rbm11     | -0.71133 | 0.009474 | 0.010721 |
| Ebp       | -0.15981 | 0.009193 | 0.010408 |
| Tmc4      | -0.63233 | 0.009    | 0.010194 |
| Stau1     | -0.14756 | 0.008979 | 0.01017  |
| Sumo2     | -0.06332 | 0.00894  | 0.010127 |
| Plekha5   | -0.19967 | 0.008798 | 0.009969 |
| Ccdc93    | -0.29903 | 0.00869  | 0.009847 |
| Mtmr6     | -0.12992 | 0.008669 | 0.009824 |
| Cdc14a    | -0.14543 | 0.008595 | 0.009743 |
| Gna13     | -0.11651 | 0.008586 | 0.009733 |
| Ackr1     | -0.29809 | 0.008571 | 0.009717 |
| Gm10275   | -0.87846 | 0.008564 | 0.00971  |
| Rps7-ps3  | -0.55715 | 0.008445 | 0.009576 |
| Tro       | -0.66309 | 0.008417 | 0.009545 |
| Gm4734    | -0.76566 | 0.008402 | 0.009529 |
| Zfp865    | -0.21281 | 0.008326 | 0.009444 |
| Glce      | -0.23915 | 0.008294 | 0.009409 |
| Zfp652os  | -0.90106 | 0.008279 | 0.009393 |
| Gm17251   | -0.40266 | 0.008218 | 0.009325 |
| Iftap     | -0.13933 | 0.008136 | 0.009232 |
| 31100800  | -0.63555 | 0.008087 | 0.009178 |
| Ptpn1     | -0.12876 | 0.008016 | 0.009102 |
| Fbxw2     | -0.1168  | 0.007966 | 0.009046 |
| Dip2b     | -0.12521 | 0.007883 | 0.008952 |
| Avpi1     | -0.17539 | 0.007874 | 0.008942 |
| Kat2a     | -0.30659 | 0.007814 | 0.008875 |
| Tmem242   | -0.19841 | 0.007566 | 0.008598 |
| C130089Kl | -0.32747 | 0.007475 | 0.008498 |
| Arhgap21  | -0.16254 | 0.00744  | 0.00846  |
| Lsm6      | -0.11577 | 0.007341 | 0.008347 |
| Gm14586   | -0.51006 | 0.007326 | 0.00833  |
| Evl       | -0.15969 | 0.007155 | 0.008139 |
| Mrpl36    | -0.15766 | 0.007129 | 0.00811  |
| Rabep2    | -0.26614 | 0.006973 | 0.007935 |
| Pgm2l1    | -0.14823 | 0.006948 | 0.007907 |
| Fam50a    | -0.16117 | 0.006919 | 0.007875 |
| Gm37472   | -0.51151 | 0.006756 | 0.007695 |
| Pigyl     | -0.1611  | 0.006555 | 0.007469 |
| Nmb       | -0.49727 | 0.006555 | 0.007469 |
| Nmrk1     | -0.3979  | 0.006534 | 0.007446 |
| Mrpl27    | -0.13846 | 0.006231 | 0.007102 |
| Coro1b    | -0.42504 | 0.006196 | 0.007063 |
| Atxn1l    | -0.20105 | 0.006168 | 0.007031 |
| Ripk2     | -0.32511 | 0.006138 | 0.006998 |
| Tmf1      | -0.11666 | 0.005919 | 0.006751 |

|           |          |          |          |
|-----------|----------|----------|----------|
| Uxs1      | -0.24626 | 0.00584  | 0.006661 |
| Tm2d3     | -0.13529 | 0.005804 | 0.006621 |
| Drg1      | -0.15349 | 0.005729 | 0.006538 |
| Naxe      | -0.13185 | 0.005641 | 0.00644  |
| Fchsd1    | -0.71074 | 0.005638 | 0.006437 |
| Sergef    | -0.49499 | 0.00553  | 0.006315 |
| Cmc2      | -0.19191 | 0.005436 | 0.006209 |
| Ctnna2    | -0.85722 | 0.005414 | 0.006185 |
| Nudc      | -0.10005 | 0.005379 | 0.006146 |
| Zfand2a   | -0.28286 | 0.005366 | 0.006131 |
| Gm16638   | -0.5938  | 0.005349 | 0.006113 |
| Ypel4     | -0.7851  | 0.005328 | 0.006089 |
| Psmd7     | -0.09652 | 0.005219 | 0.005967 |
| Dlgap4    | -0.13431 | 0.005198 | 0.005943 |
| Hmox1     | -0.46069 | 0.005149 | 0.005888 |
| Adrm1     | -0.1559  | 0.005118 | 0.005854 |
| Eif2ak4   | -0.27501 | 0.005057 | 0.005784 |
| Ube2d3    | -0.07778 | 0.005033 | 0.005757 |
| Gm44668   | -0.54483 | 0.004925 | 0.005637 |
| Mtmr9     | -0.27042 | 0.004892 | 0.0056   |
| Hexim1    | -0.15945 | 0.004612 | 0.00528  |
| Zfp668    | -0.45391 | 0.004598 | 0.005265 |
| Nme4      | -0.67565 | 0.004572 | 0.005236 |
| Adgrb2    | -0.54524 | 0.00447  | 0.005121 |
| Rpl15-ps2 | -0.73621 | 0.004466 | 0.005117 |
| Rimk1a    | -0.88862 | 0.004406 | 0.005048 |
| Strn4     | -0.16658 | 0.004212 | 0.004829 |
| Brd4      | -0.10998 | 0.004152 | 0.004761 |
| E2f6      | -0.25812 | 0.004101 | 0.004704 |
| Mthfd1l   | -0.6627  | 0.003965 | 0.004549 |
| Gm43984   | -0.6797  | 0.003939 | 0.004521 |
| Cox7a2    | -0.07176 | 0.003932 | 0.004513 |
| Phf24     | -0.97987 | 0.003906 | 0.004484 |
| Hscb      | -0.28735 | 0.003861 | 0.004433 |
| Llgl1     | -0.23881 | 0.003846 | 0.004417 |
| Utp23     | -0.28366 | 0.003767 | 0.004328 |
| Pole2     | -0.717   | 0.003729 | 0.004285 |
| Pctp      | -0.53435 | 0.003656 | 0.004202 |
| Snx20     | -0.93571 | 0.003591 | 0.004129 |
| Dis3l     | -0.36868 | 0.003495 | 0.004019 |
| Ddx50     | -0.10413 | 0.003431 | 0.003947 |
| Pcdhb21   | -0.64484 | 0.003425 | 0.00394  |
| Rps15a-ps | -0.51213 | 0.003367 | 0.003874 |
| Idh3g     | -0.14136 | 0.003364 | 0.003871 |
| Zfp984    | -0.48485 | 0.003331 | 0.003834 |
| Gm21955   | -0.847   | 0.003185 | 0.003668 |
| Crif1     | -0.59667 | 0.003105 | 0.003577 |

|           |          |          |          |
|-----------|----------|----------|----------|
| Psen2     | -0.20969 | 0.003051 | 0.003515 |
| Trappc3   | -0.14826 | 0.003044 | 0.003508 |
| Gm43149   | -0.64399 | 0.003034 | 0.003497 |
| Insig2    | -0.16873 | 0.003005 | 0.003464 |
| Psmc10    | -0.22591 | 0.00299  | 0.003447 |
| Pcgf2     | -0.28293 | 0.002977 | 0.003433 |
| Exoc7     | -0.21509 | 0.002918 | 0.003365 |
| Vapa      | -0.10019 | 0.002914 | 0.003362 |
| Mrps6     | -0.20889 | 0.002901 | 0.003346 |
| Zfp825    | -0.45932 | 0.002871 | 0.003313 |
| Ndufaf2   | -0.18757 | 0.002837 | 0.003275 |
| Ei24      | -0.13671 | 0.002813 | 0.003247 |
| Inpp4a    | -0.28443 | 0.002784 | 0.003214 |
| Lratd2    | -0.35032 | 0.002729 | 0.003152 |
| Rps15a-ps | -0.46582 | 0.002693 | 0.00311  |
| Rpl7-ps9  | -0.42114 | 0.002673 | 0.003087 |
| Gm49502   | -0.64215 | 0.002616 | 0.003024 |
| Gm43336   | -0.4062  | 0.002604 | 0.00301  |
| Mcmdbp    | -0.17274 | 0.002594 | 0.002999 |
| Sgsh      | -0.4878  | 0.002588 | 0.002993 |
| A430018G  | -0.39182 | 0.002588 | 0.002992 |
| Gm6477    | -0.83459 | 0.002583 | 0.002987 |
| Ms4a6c    | -1.01575 | 0.002563 | 0.002964 |
| Nqo2      | -0.3113  | 0.002539 | 0.002937 |
| Rpusd1    | -0.39214 | 0.002533 | 0.00293  |
| Gm43445   | -0.95948 | 0.002502 | 0.002895 |
| Gm5854    | -0.83192 | 0.002415 | 0.002795 |
| Pqbp1     | -0.17462 | 0.0024   | 0.002777 |
| Gm43281   | -0.60429 | 0.002313 | 0.002678 |
| Gm12254   | -0.60241 | 0.002231 | 0.002585 |
| 6430548N  | -0.23389 | 0.002203 | 0.002553 |
| Pcsk2     | -0.87293 | 0.002138 | 0.002478 |
| Ctnnbl1   | -0.22035 | 0.002127 | 0.002466 |
| Plekhn2   | -0.24404 | 0.002111 | 0.002448 |
| Rps13-ps2 | -1.1004  | 0.002084 | 0.002418 |
| Nudt18    | -0.31582 | 0.001995 | 0.002315 |
| Abcb9     | -0.37679 | 0.001976 | 0.002294 |
| Prune1    | -0.29753 | 0.001931 | 0.002242 |
| Txn11     | -0.11772 | 0.001924 | 0.002235 |
| Ncoa4     | -0.1764  | 0.001885 | 0.00219  |
| Fabp3     | -0.84628 | 0.001837 | 0.002135 |
| Urb2      | -0.48004 | 0.001811 | 0.002105 |
| C2cd2     | -0.21205 | 0.001799 | 0.002091 |
| 6030460B  | -0.92069 | 0.001784 | 0.002075 |
| Ttc38     | -0.50503 | 0.001784 | 0.002074 |
| Clip2     | -0.35754 | 0.001783 | 0.002074 |
| Tspan33   | -0.54088 | 0.001773 | 0.002062 |

|           |          |          |          |
|-----------|----------|----------|----------|
| Mfsd14b   | -0.19309 | 0.001772 | 0.002061 |
| Gm43071   | -0.59836 | 0.00176  | 0.002048 |
| Hba-a1    | -0.43857 | 0.001745 | 0.002031 |
| Man1b1    | -0.23423 | 0.001736 | 0.00202  |
| Gak       | -0.2061  | 0.001715 | 0.001996 |
| Eif4b     | -0.1187  | 0.001692 | 0.00197  |
| Gm42670   | -0.88    | 0.001687 | 0.001964 |
| Man2b1    | -0.19937 | 0.00166  | 0.001933 |
| Ercc4     | -0.33142 | 0.00165  | 0.001922 |
| Cda       | -1.06316 | 0.001646 | 0.001918 |
| Akt1s1    | -0.23749 | 0.001624 | 0.001892 |
| Zfp706    | -0.11828 | 0.001571 | 0.001831 |
| D130017N  | -0.98327 | 0.001571 | 0.001831 |
| Irf6      | -0.68408 | 0.001553 | 0.00181  |
| Aplp1     | -0.26918 | 0.001544 | 0.001801 |
| Whamm     | -0.23616 | 0.001485 | 0.001732 |
| Gm43361   | -0.50621 | 0.001471 | 0.001717 |
| Foxn2     | -0.20646 | 0.001433 | 0.001672 |
| Nap1l3    | -0.45892 | 0.001432 | 0.001672 |
| 1700066M  | -0.38303 | 0.001404 | 0.001639 |
| Csnk2b    | -0.12708 | 0.001382 | 0.001614 |
| Ogg1      | -0.56052 | 0.001374 | 0.001604 |
| Imp3      | -0.13278 | 0.001366 | 0.001596 |
| Hpcal4    | -0.56454 | 0.001351 | 0.001578 |
| Nrn1      | -1.06461 | 0.001331 | 0.001555 |
| Pdha1     | -0.17275 | 0.001273 | 0.001488 |
| Stx6      | -0.18415 | 0.001245 | 0.001455 |
| Hr        | -0.60202 | 0.001233 | 0.001442 |
| Lypd1     | -0.61408 | 0.001172 | 0.001371 |
| Plekhm1   | -0.2463  | 0.001167 | 0.001365 |
| Mob2      | -0.17237 | 0.001164 | 0.001362 |
| Traf6     | -0.28439 | 0.001162 | 0.001359 |
| Usp35     | -0.92386 | 0.001161 | 0.001359 |
| Gm48600   | -0.76381 | 0.001119 | 0.00131  |
| Otud1     | -0.26643 | 0.001117 | 0.001308 |
| Abi1      | -0.14249 | 0.001073 | 0.001257 |
| Vps41     | -0.2022  | 0.001066 | 0.001249 |
| Gm43387   | -0.81099 | 0.001011 | 0.001185 |
| Uba2      | -0.13464 | 0.000997 | 0.001169 |
| Gem       | -0.46461 | 0.000964 | 0.001131 |
| Adprh     | -0.16885 | 0.000955 | 0.001121 |
| Caprin1   | -0.12834 | 0.000936 | 0.001098 |
| Chmp1b    | -0.23132 | 0.000932 | 0.001093 |
| Rps26-ps1 | -0.52793 | 0.000926 | 0.001087 |
| Zbtb8a    | -0.52591 | 0.000926 | 0.001087 |
| Mrpl48    | -0.15815 | 0.000917 | 0.001077 |
| Vps16     | -0.29742 | 0.000916 | 0.001075 |



|           |          |          |          |
|-----------|----------|----------|----------|
| Slc27a3   | -0.90851 | 0.000878 | 0.001031 |
| Sema4d    | -0.5502  | 0.000863 | 0.001014 |
| Cab39     | -0.13427 | 0.00086  | 0.00101  |
| 0610009L1 | -0.46053 | 0.000857 | 0.001007 |
| Tle6      | -1.07139 | 0.000829 | 0.000974 |
| Vps36     | -0.13256 | 0.000787 | 0.000925 |
| Fanc1     | -0.51927 | 0.000782 | 0.000919 |
| Gclc      | -0.23935 | 0.000762 | 0.000897 |
| Kcmf1     | -0.14783 | 0.000747 | 0.000879 |
| Atp23     | -0.5727  | 0.000717 | 0.000844 |
| Gmppb     | -0.43519 | 0.000717 | 0.000844 |
| Mybl1     | -0.55929 | 0.00071  | 0.000836 |
| Plvap     | -1.08006 | 0.000706 | 0.000832 |
| Pecr      | -0.59946 | 0.000705 | 0.000831 |
| Cd46      | -0.60057 | 0.000704 | 0.000829 |
| Scoc      | -0.14758 | 0.000702 | 0.000828 |
| Fbxl6     | -0.28588 | 0.000701 | 0.000827 |
| Pccb      | -0.3546  | 0.00068  | 0.000802 |
| Cln6      | -0.39165 | 0.000675 | 0.000796 |
| Fut11     | -0.2513  | 0.000661 | 0.00078  |
| A430110L1 | -1.1942  | 0.000649 | 0.000766 |
| Gm46430   | -0.44131 | 0.000649 | 0.000766 |
| Dlgap3    | -0.85131 | 0.000644 | 0.00076  |
| D130062J1 | -0.53263 | 0.000643 | 0.000758 |
| Cplx3     | -0.25278 | 0.000637 | 0.000752 |
| Ablim2    | -0.63064 | 0.000624 | 0.000737 |
| Nrep      | -0.20096 | 0.000619 | 0.000731 |
| Scx       | -1.1973  | 0.000617 | 0.000729 |
| Sel1l3    | -1.04813 | 0.000614 | 0.000725 |
| Usp11     | -0.45395 | 0.00061  | 0.000721 |
| Spef1     | -0.36926 | 0.000608 | 0.000719 |
| C030014I2 | -0.50305 | 0.000608 | 0.000718 |
| Gm6863    | -0.64919 | 0.000587 | 0.000693 |
| Gm13340   | -0.99212 | 0.00058  | 0.000685 |
| Btbd6     | -0.38923 | 0.000575 | 0.00068  |
| Lrtm1     | -0.33264 | 0.00057  | 0.000674 |
| Elavl3    | -0.77373 | 0.000559 | 0.000661 |
| Rskr      | -0.38485 | 0.000553 | 0.000654 |
| Srd5a3    | -0.41648 | 0.000548 | 0.000648 |
| Maea      | -0.20535 | 0.000541 | 0.000641 |
| Lrrc42    | -0.23758 | 0.000533 | 0.00063  |
| Vps13c    | -0.21551 | 0.000531 | 0.000629 |
| Fbxo11    | -0.15575 | 0.000529 | 0.000627 |
| Ube2g1    | -0.20304 | 0.000526 | 0.000623 |
| 4933429O  | -0.83806 | 0.000521 | 0.000617 |
| Txnrd2    | -0.45149 | 0.000504 | 0.000597 |
| Msantd3   | -0.33449 | 0.000493 | 0.000585 |

|          |          |          |          |
|----------|----------|----------|----------|
| Ephb3    | -0.79967 | 0.000491 | 0.000582 |
| Sugt1    | -0.13464 | 0.000483 | 0.000573 |
| Ptger1   | -0.88348 | 0.000471 | 0.000559 |
| Rcor1    | -0.19497 | 0.000467 | 0.000554 |
| Gm45203  | -1.16895 | 0.000443 | 0.000525 |
| Abl1     | -0.24819 | 0.000436 | 0.000518 |
| 2610507B | -0.17463 | 0.000432 | 0.000513 |
| Ppm1g    | -0.17787 | 0.00043  | 0.00051  |
| Ttbk1    | -1.21053 | 0.000423 | 0.000503 |
| Fam187b  | -0.952   | 0.000416 | 0.000495 |
| Crabp1   | -1.05066 | 0.000411 | 0.000488 |
| Il18bp   | -0.60346 | 0.000403 | 0.000479 |
| Colgalt1 | -0.1989  | 0.000381 | 0.000453 |
| 4833438C | -0.62043 | 0.000379 | 0.000451 |
| Psm5     | -0.15779 | 0.000374 | 0.000445 |
| Bc1      | -0.94033 | 0.000365 | 0.000435 |
| N4bp2os  | -0.4964  | 0.000352 | 0.000419 |
| Ppp1r21  | -0.26481 | 0.000338 | 0.000403 |
| Ndufs5   | -0.12392 | 0.000335 | 0.000399 |
| Nsmf     | -0.26103 | 0.000332 | 0.000396 |
| Chrna1os | -1.16033 | 0.000325 | 0.000387 |
| Igf2r    | -0.27479 | 0.000319 | 0.00038  |
| Atp5j2   | -0.09038 | 0.000312 | 0.000372 |
| Gar1     | -0.26933 | 0.000306 | 0.000365 |
| Cdpf1    | -0.44778 | 0.000305 | 0.000365 |
| Gm8186   | -0.49486 | 0.000302 | 0.00036  |
| Gm42829  | -1.07176 | 0.000293 | 0.00035  |
| Wiz      | -0.26601 | 0.000278 | 0.000332 |
| Gm4149   | -1.12961 | 0.000276 | 0.00033  |
| Ubt      | -0.15398 | 0.000275 | 0.000329 |
| Fbxl14   | -0.22242 | 0.000271 | 0.000324 |
| Tbcel    | -0.23752 | 0.000269 | 0.000322 |
| Atn1     | -0.19874 | 0.000266 | 0.000319 |
| Panx2    | -1.02694 | 0.000266 | 0.000318 |
| Mvk      | -0.36711 | 0.000266 | 0.000318 |
| Blvra    | -0.27506 | 0.000258 | 0.000308 |
| Rab5a    | -0.14854 | 0.000252 | 0.000302 |
| Mrps12   | -0.18734 | 0.000249 | 0.000298 |
| Cul4b    | -0.32679 | 0.000246 | 0.000295 |
| R3hcc1   | -0.34122 | 0.000246 | 0.000294 |
| BC060293 | -0.76394 | 0.00024  | 0.000287 |
| Slc39a11 | -1.01485 | 0.000235 | 0.000282 |
| Wdr91    | -0.40259 | 0.000228 | 0.000274 |
| Prdx3    | -0.21171 | 0.000228 | 0.000273 |
| Baiap2l1 | -1.14226 | 0.00022  | 0.000264 |
| Gm50055  | -1.18865 | 0.000212 | 0.000255 |
| Srp9     | -0.12391 | 0.00021  | 0.000252 |

|          |          |          |          |
|----------|----------|----------|----------|
| Ino80b   | -0.28503 | 0.000202 | 0.000242 |
| Ctps     | -0.37493 | 0.000195 | 0.000234 |
| Prkaa1   | -0.28105 | 0.000193 | 0.000232 |
| 1810013L | -0.23349 | 0.000192 | 0.000231 |
| Snrk     | -0.10862 | 0.000192 | 0.000231 |
| Cpm      | -0.29487 | 0.000191 | 0.00023  |
| Smim27   | -0.22316 | 0.000189 | 0.000227 |
| Fgd6     | -0.275   | 0.000188 | 0.000226 |
| Rpl3-ps1 | -0.42901 | 0.000175 | 0.00021  |
| Scfd2    | -0.72365 | 0.000175 | 0.00021  |
| Rpl9-ps6 | -0.3501  | 0.000174 | 0.00021  |
| Gm9294   | -0.94214 | 0.000171 | 0.000205 |
| Spx      | -1.00158 | 0.000168 | 0.000202 |
| Haus4    | -0.45871 | 0.000166 | 0.000199 |
| Stt3a    | -0.20573 | 0.000159 | 0.000191 |
| mt-Tr    | -0.68296 | 0.000152 | 0.000183 |
| Akr1b8   | -1.1567  | 0.000152 | 0.000183 |
| Cacnb4   | -1.17509 | 0.00015  | 0.00018  |
| Ssr3     | -0.15077 | 0.000147 | 0.000177 |
| Zfp367   | -0.35707 | 0.000146 | 0.000176 |
| Hspa13   | -0.25583 | 0.000144 | 0.000173 |
| Gm14403  | -0.71581 | 0.000143 | 0.000173 |
| Cybc1    | -0.39189 | 0.00014  | 0.000169 |
| Cnbp     | -0.09621 | 0.000139 | 0.000168 |
| Idnk     | -0.21042 | 0.000138 | 0.000167 |
| Lyrn1    | -0.32116 | 0.000137 | 0.000166 |
| Dpp8     | -0.1916  | 0.000137 | 0.000165 |
| Ogfod3   | -0.34136 | 0.000136 | 0.000165 |
| Trim24   | -0.19913 | 0.000136 | 0.000164 |
| Ercc1    | -0.30329 | 0.000134 | 0.000162 |
| Ghdc     | -0.45552 | 0.000134 | 0.000161 |
| Diras1   | -1.31099 | 0.000133 | 0.000161 |
| Nrn1l    | -0.63629 | 0.000133 | 0.000161 |
| Snx13    | -0.22601 | 0.000132 | 0.00016  |
| Nr1h2    | -0.20611 | 0.000131 | 0.000158 |
| Slc10a7  | -0.34193 | 0.000126 | 0.000152 |
| Gm47121  | -0.80855 | 0.000125 | 0.000151 |
| Sumf2    | -0.44441 | 0.000122 | 0.000148 |
| Itfg1    | -0.22108 | 0.000121 | 0.000146 |
| Lgals4   | -0.50834 | 0.00012  | 0.000145 |
| Rex1bd   | -0.14832 | 0.000119 | 0.000144 |
| Gm45345  | -1.09617 | 0.000117 | 0.000142 |
| Rnf167   | -0.18636 | 0.000115 | 0.00014  |
| Cry2     | -0.26988 | 0.000115 | 0.000139 |
| Triqk    | -0.36979 | 0.000112 | 0.000135 |
| Pawr     | -0.35991 | 0.00011  | 0.000134 |
| Rab36    | -1.07025 | 0.00011  | 0.000133 |

|          |          |          |          |
|----------|----------|----------|----------|
| Nnt-1    | -1.00364 | 0.000108 | 0.00013  |
| Cdk5rap3 | -0.30203 | 0.000101 | 0.000122 |
| Tor1b    | -0.22199 | 0.0001   | 0.000122 |
| Aph1c    | -1.30449 | 9.93E-05 | 0.00012  |
| Mical3   | -0.31653 | 9.83E-05 | 0.000119 |
| Pcdhb22  | -0.76201 | 9.74E-05 | 0.000118 |
| Tmem106i | -0.79433 | 9.58E-05 | 0.000116 |
| Cops6    | -0.17141 | 9.55E-05 | 0.000116 |
| Trim27   | -0.32432 | 9.28E-05 | 0.000113 |
| Numbl    | -0.57539 | 9.18E-05 | 0.000111 |
| Lrrc51   | -0.72745 | 9.07E-05 | 0.00011  |
| mt-Th    | -1.01758 | 8.84E-05 | 0.000107 |
| Anapc13  | -0.15036 | 8.78E-05 | 0.000107 |
| Plaa     | -0.26723 | 8.75E-05 | 0.000106 |
| Slc7a14  | -1.20073 | 8.55E-05 | 0.000104 |
| Llph     | -0.19431 | 8.39E-05 | 0.000102 |
| Nudt16   | -0.457   | 7.72E-05 | 9.38E-05 |
| Hspe1    | -0.14854 | 7.63E-05 | 9.28E-05 |
| Pla2g15  | -0.57089 | 7.59E-05 | 9.24E-05 |
| Pdk2     | -0.34681 | 7.58E-05 | 9.22E-05 |
| Stub1    | -0.14799 | 7.49E-05 | 9.12E-05 |
| Gad1     | -1.21597 | 7.44E-05 | 9.06E-05 |
| Emb      | -1.50032 | 7.42E-05 | 9.04E-05 |
| Sh3kbp1  | -0.30911 | 7.38E-05 | 8.99E-05 |
| Azin2    | -0.53936 | 7.36E-05 | 8.96E-05 |
| Gm45844  | -1.00524 | 7.19E-05 | 8.75E-05 |
| Spred3   | -0.64608 | 7.01E-05 | 8.54E-05 |
| Gm43256  | -1.14077 | 6.91E-05 | 8.42E-05 |
| Tbl1xr1  | -0.24326 | 6.72E-05 | 8.19E-05 |
| Gatd3a   | -0.32232 | 6.67E-05 | 8.13E-05 |
| Mthfd2l  | -0.23617 | 6.33E-05 | 7.72E-05 |
| Rfx5     | -0.50285 | 6.14E-05 | 7.50E-05 |
| Gm43672  | -1.23046 | 6.12E-05 | 7.46E-05 |
| Gm42636  | -1.22151 | 5.85E-05 | 7.14E-05 |
| Slc19a1  | -0.28631 | 5.76E-05 | 7.03E-05 |
| Sacm1l   | -0.2476  | 5.69E-05 | 6.95E-05 |
| Tmed9    | -0.13583 | 5.64E-05 | 6.90E-05 |
| Ap3m1    | -0.25774 | 5.40E-05 | 6.60E-05 |
| Pcdhgc3  | -0.79282 | 5.38E-05 | 6.58E-05 |
| Ethe1    | -0.34866 | 5.34E-05 | 6.53E-05 |
| Abhd1    | -1.03801 | 5.34E-05 | 6.53E-05 |
| Nmt2     | -0.27825 | 5.29E-05 | 6.47E-05 |
| Pus1     | -0.53692 | 5.22E-05 | 6.39E-05 |
| Mtrf1l   | -0.4149  | 5.13E-05 | 6.28E-05 |
| Sptb     | -0.51732 | 5.10E-05 | 6.24E-05 |
| Itga10   | -0.9093  | 4.98E-05 | 6.10E-05 |
| Nedd1    | -0.44592 | 4.88E-05 | 5.98E-05 |

|           |          |          |          |
|-----------|----------|----------|----------|
| A930027H  | -1.38952 | 4.81E-05 | 5.89E-05 |
| Eml4      | -0.2417  | 4.79E-05 | 5.86E-05 |
| Grin1     | -1.32759 | 4.69E-05 | 5.74E-05 |
| Ndrg4     | -0.64506 | 4.62E-05 | 5.66E-05 |
| Gabrr2    | -0.59088 | 4.59E-05 | 5.62E-05 |
| Neto2     | -0.94301 | 4.56E-05 | 5.59E-05 |
| Iqgap2    | -1.32894 | 4.55E-05 | 5.57E-05 |
| Rwdd1     | -0.14792 | 4.36E-05 | 5.35E-05 |
| mt-Nd3    | -0.96184 | 4.34E-05 | 5.33E-05 |
| Zfp783    | -0.60691 | 4.26E-05 | 5.22E-05 |
| Gm15427   | -0.48458 | 4.21E-05 | 5.17E-05 |
| Pik3c3    | -0.34748 | 4.19E-05 | 5.14E-05 |
| Pcdhb11   | -0.96933 | 4.11E-05 | 5.05E-05 |
| Cep83     | -0.32667 | 3.99E-05 | 4.89E-05 |
| Rgl3      | -0.99061 | 3.94E-05 | 4.84E-05 |
| Gm12184   | -1.11625 | 3.91E-05 | 4.80E-05 |
| Rpl19-ps1 | -0.92854 | 3.71E-05 | 4.56E-05 |
| Cplx1     | -1.04097 | 3.68E-05 | 4.53E-05 |
| Prodh     | -0.4289  | 3.56E-05 | 4.38E-05 |
| Etv3      | -0.28626 | 3.50E-05 | 4.31E-05 |
| Sec24b    | -0.25313 | 3.35E-05 | 4.12E-05 |
| Slc20a2   | -0.35355 | 3.25E-05 | 4.00E-05 |
| Epb41l4b  | -1.03159 | 3.25E-05 | 4.00E-05 |
| Nat2      | -1.13198 | 3.14E-05 | 3.87E-05 |
| Gm9385    | -0.5982  | 3.12E-05 | 3.84E-05 |
| Rbbp9     | -0.3006  | 3.11E-05 | 3.83E-05 |
| Ccdc112   | -0.43546 | 3.02E-05 | 3.72E-05 |
| Morf4l1-p | -1.26956 | 3.02E-05 | 3.72E-05 |
| Vps26a    | -0.273   | 3.01E-05 | 3.71E-05 |
| Rab1a     | -0.14219 | 2.97E-05 | 3.66E-05 |
| Vps35l    | -0.31469 | 2.96E-05 | 3.65E-05 |
| Chl1      | -1.07243 | 2.84E-05 | 3.51E-05 |
| Ryk       | -0.18671 | 2.80E-05 | 3.45E-05 |
| Babam2    | -0.24733 | 2.75E-05 | 3.40E-05 |
| Cyb561    | -0.82055 | 2.74E-05 | 3.39E-05 |
| Cdc26     | -0.19312 | 2.72E-05 | 3.36E-05 |
| D830050J1 | -0.82106 | 2.65E-05 | 3.27E-05 |
| Fads6     | -1.15725 | 2.64E-05 | 3.26E-05 |
| Naa10     | -0.30392 | 2.59E-05 | 3.20E-05 |
| Sec13     | -0.23412 | 2.57E-05 | 3.18E-05 |
| Gm13436   | -1.10198 | 2.49E-05 | 3.08E-05 |
| Rbpms2    | -0.44398 | 2.48E-05 | 3.06E-05 |
| Mdga1     | -1.05704 | 2.46E-05 | 3.05E-05 |
| Copb2     | -0.18556 | 2.30E-05 | 2.85E-05 |
| Ntan1     | -0.18627 | 2.26E-05 | 2.80E-05 |
| Tab2      | -0.1795  | 2.26E-05 | 2.79E-05 |
| Fam234b   | -0.71295 | 2.25E-05 | 2.79E-05 |

|           |          |          |          |
|-----------|----------|----------|----------|
| Gm973     | -1.31775 | 2.16E-05 | 2.68E-05 |
| Cuedc2    | -0.16843 | 2.15E-05 | 2.66E-05 |
| Snap29    | -0.36474 | 2.14E-05 | 2.65E-05 |
| Phf10     | -0.28029 | 2.12E-05 | 2.63E-05 |
| Dbf4      | -1.06174 | 2.12E-05 | 2.62E-05 |
| Nmnat2    | -1.05058 | 2.04E-05 | 2.53E-05 |
| Tom1l1    | -1.07197 | 2.02E-05 | 2.51E-05 |
| Fmn2      | -1.01617 | 2.02E-05 | 2.50E-05 |
| Igdcc4    | -1.38587 | 1.98E-05 | 2.45E-05 |
| Rpp25l    | -0.25736 | 1.87E-05 | 2.32E-05 |
| Morf4l2   | -0.18266 | 1.86E-05 | 2.31E-05 |
| Banf1     | -0.17616 | 1.86E-05 | 2.30E-05 |
| Rpl36-ps2 | -0.94676 | 1.85E-05 | 2.29E-05 |
| Yipf1     | -0.25192 | 1.82E-05 | 2.26E-05 |
| Copg1     | -0.25311 | 1.75E-05 | 2.17E-05 |
| Vapb      | -0.19729 | 1.73E-05 | 2.14E-05 |
| Atg10     | -0.42366 | 1.62E-05 | 2.01E-05 |
| Cant1     | -0.31743 | 1.61E-05 | 2.00E-05 |
| Wdr13     | -0.33762 | 1.58E-05 | 1.97E-05 |
| Tec       | -0.60938 | 1.56E-05 | 1.94E-05 |
| 4921516A  | -1.30472 | 1.50E-05 | 1.87E-05 |
| Gm49703   | -0.9156  | 1.50E-05 | 1.87E-05 |
| Csk       | -0.24969 | 1.50E-05 | 1.86E-05 |
| Ube2s     | -0.71129 | 1.50E-05 | 1.86E-05 |
| 2210016L2 | -0.20727 | 1.48E-05 | 1.84E-05 |
| Hnrnpk    | -0.10459 | 1.47E-05 | 1.84E-05 |
| Aldh16a1  | -0.48892 | 1.44E-05 | 1.80E-05 |
| Emc9      | -0.3853  | 1.38E-05 | 1.72E-05 |
| Rab3b     | -0.91678 | 1.36E-05 | 1.70E-05 |
| H2bc21    | -0.55708 | 1.35E-05 | 1.68E-05 |
| Apc2      | -0.61535 | 1.34E-05 | 1.67E-05 |
| Cnih4     | -0.1733  | 1.30E-05 | 1.62E-05 |
| Pdp1      | -0.44812 | 1.24E-05 | 1.54E-05 |
| Gm11808   | -0.58601 | 1.23E-05 | 1.53E-05 |
| Bik       | -1.22641 | 1.21E-05 | 1.52E-05 |
| Tmem104   | -0.64034 | 1.21E-05 | 1.51E-05 |
| Rpl6l     | -1.00452 | 1.20E-05 | 1.50E-05 |
| Mgat5     | -0.36174 | 1.16E-05 | 1.45E-05 |
| P3h3      | -0.44956 | 1.16E-05 | 1.45E-05 |
| Gabrg2    | -0.68261 | 1.14E-05 | 1.42E-05 |
| Pla2g12a  | -0.31667 | 1.12E-05 | 1.40E-05 |
| Gm20008   | -1.15081 | 1.08E-05 | 1.35E-05 |
| Gmfb      | -0.23889 | 1.07E-05 | 1.34E-05 |
| Gm47204   | -1.26183 | 1.06E-05 | 1.33E-05 |
| Gm43312   | -1.03001 | 1.02E-05 | 1.27E-05 |
| Gm44509   | -0.80792 | 1.01E-05 | 1.26E-05 |
| Rcbtb1    | -0.27057 | 9.85E-06 | 1.23E-05 |

|           |          |          |          |
|-----------|----------|----------|----------|
| Ccnyl1    | -0.3822  | 9.75E-06 | 1.22E-05 |
| Vps13d    | -0.238   | 9.75E-06 | 1.22E-05 |
| Hgsnat    | -0.33312 | 9.32E-06 | 1.17E-05 |
| Gm28437   | -1.07161 | 9.29E-06 | 1.16E-05 |
| Rps25-ps1 | -0.74835 | 9.21E-06 | 1.15E-05 |
| Irs1      | -0.70068 | 9.00E-06 | 1.13E-05 |
| Otud7a    | -1.29571 | 8.97E-06 | 1.12E-05 |
| Tmtc4     | -0.48221 | 8.84E-06 | 1.11E-05 |
| 4632418H  | -0.46627 | 8.71E-06 | 1.09E-05 |
| Gm49486   | -1.56087 | 8.67E-06 | 1.09E-05 |
| Lockd     | -0.9688  | 8.65E-06 | 1.08E-05 |
| Thap3     | -0.23697 | 8.60E-06 | 1.08E-05 |
| Sco2      | -0.47715 | 8.42E-06 | 1.06E-05 |
| Ccdc106   | -1.037   | 8.43E-06 | 1.06E-05 |
| Brox      | -0.28667 | 8.38E-06 | 1.05E-05 |
| Ifitm10   | -0.91868 | 8.30E-06 | 1.04E-05 |
| Cpne7     | -1.52104 | 8.18E-06 | 1.03E-05 |
| Gm47585   | -0.92757 | 8.04E-06 | 1.01E-05 |
| Lrp2bp    | -1.08355 | 8.04E-06 | 1.01E-05 |
| Fxyd2     | -1.48166 | 8.01E-06 | 1.01E-05 |
| Rab42     | -1.23282 | 7.92E-06 | 9.95E-06 |
| Fth1-ps   | -1.00132 | 7.90E-06 | 9.93E-06 |
| Gm3728    | -0.96096 | 7.88E-06 | 9.89E-06 |
| 2510039O  | -0.3189  | 7.78E-06 | 9.78E-06 |
| Arhgef4   | -1.14786 | 7.71E-06 | 9.69E-06 |
| Gga1      | -0.31061 | 7.57E-06 | 9.52E-06 |
| Ranbp9    | -0.24197 | 7.56E-06 | 9.50E-06 |
| Med29     | -0.28215 | 7.52E-06 | 9.45E-06 |
| Gm29216   | -1.26167 | 7.50E-06 | 9.43E-06 |
| Pgls      | -0.20341 | 7.23E-06 | 9.10E-06 |
| Bphl      | -0.39086 | 7.09E-06 | 8.92E-06 |
| Fbxw4     | -0.40157 | 7.07E-06 | 8.90E-06 |
| Fcor      | -1.20009 | 7.08E-06 | 8.91E-06 |
| Gas5      | -0.12286 | 6.92E-06 | 8.71E-06 |
| Crispld2  | -0.95525 | 6.65E-06 | 8.37E-06 |
| Bcl6      | -0.43919 | 6.50E-06 | 8.19E-06 |
| Fbln1     | -1.67951 | 6.30E-06 | 7.93E-06 |
| Slc41a1   | -0.32772 | 6.18E-06 | 7.78E-06 |
| Sptbn2    | -1.42424 | 6.11E-06 | 7.70E-06 |
| Med10     | -0.25109 | 5.92E-06 | 7.47E-06 |
| Ticam1    | -0.86894 | 5.90E-06 | 7.44E-06 |
| 3110082I1 | -0.61494 | 5.74E-06 | 7.24E-06 |
| Ufd1      | -0.27042 | 5.66E-06 | 7.14E-06 |
| Iglon5    | -1.61493 | 5.48E-06 | 6.92E-06 |
| Gm42432   | -0.61723 | 5.44E-06 | 6.87E-06 |
| Tspan3    | -0.15787 | 5.35E-06 | 6.75E-06 |
| Lyp1a1    | -1.12305 | 5.30E-06 | 6.69E-06 |

|          |          |          |          |
|----------|----------|----------|----------|
| Ppfia4   | -1.09064 | 5.04E-06 | 6.37E-06 |
| Nln      | -0.75241 | 4.95E-06 | 6.26E-06 |
| Ywhag    | -0.22279 | 4.93E-06 | 6.23E-06 |
| Fech     | -0.34893 | 4.78E-06 | 6.04E-06 |
| Adgrb1   | -1.4217  | 4.77E-06 | 6.04E-06 |
| Nudcd3   | -0.19083 | 4.67E-06 | 5.91E-06 |
| Hmgcll1  | -1.29481 | 4.53E-06 | 5.73E-06 |
| Pxk      | -0.24761 | 4.41E-06 | 5.58E-06 |
| Gab3     | -1.1668  | 4.32E-06 | 5.47E-06 |
| Rbfa     | -0.37406 | 4.27E-06 | 5.42E-06 |
| Dact3    | -0.46481 | 4.27E-06 | 5.41E-06 |
| Mitd1    | -0.32498 | 4.18E-06 | 5.30E-06 |
| mt-Tq    | -1.34216 | 4.17E-06 | 5.28E-06 |
| Spidr    | -0.50593 | 4.09E-06 | 5.19E-06 |
| Gm37132  | -1.30123 | 4.10E-06 | 5.20E-06 |
| Tmem106l | -0.22519 | 3.94E-06 | 5.00E-06 |
| Gm44510  | -1.01214 | 3.82E-06 | 4.86E-06 |
| Pip4k2b  | -0.39201 | 3.81E-06 | 4.84E-06 |
| Gm4221   | -1.60572 | 3.79E-06 | 4.81E-06 |
| Gba      | -0.50623 | 3.76E-06 | 4.78E-06 |
| Ndn      | -0.30118 | 3.70E-06 | 4.70E-06 |
| Efcab15  | -1.05789 | 3.69E-06 | 4.69E-06 |
| Camkv    | -1.27541 | 3.66E-06 | 4.65E-06 |
| Sult4a1  | -1.41022 | 3.50E-06 | 4.45E-06 |
| Hsbp1    | -0.14895 | 3.43E-06 | 4.36E-06 |
| Snf8     | -0.2351  | 3.36E-06 | 4.28E-06 |
| Slc31a1  | -0.2363  | 3.36E-06 | 4.27E-06 |
| Ctsk     | -1.35456 | 3.34E-06 | 4.25E-06 |
| Echs1    | -0.26682 | 3.33E-06 | 4.23E-06 |
| Gm21596  | -0.63415 | 3.28E-06 | 4.17E-06 |
| Gm38009  | -0.97381 | 3.18E-06 | 4.05E-06 |
| Gabbr2   | -1.48568 | 3.11E-06 | 3.96E-06 |
| Dars     | -0.28191 | 2.94E-06 | 3.75E-06 |
| Cpped1   | -0.44001 | 2.83E-06 | 3.60E-06 |
| Cwc15    | -0.1655  | 2.81E-06 | 3.58E-06 |
| Nipa1    | -0.54693 | 2.78E-06 | 3.55E-06 |
| Cracd    | -1.42677 | 2.74E-06 | 3.49E-06 |
| Trim9    | -0.36298 | 2.67E-06 | 3.41E-06 |
| Gm11772  | -1.16643 | 2.64E-06 | 3.37E-06 |
| Cdv3     | -0.19922 | 2.51E-06 | 3.20E-06 |
| Smad5    | -0.22902 | 2.43E-06 | 3.11E-06 |
| Chst10   | -1.57927 | 2.34E-06 | 2.99E-06 |
| C1ql1    | -1.27639 | 2.30E-06 | 2.94E-06 |
| Sipa1l2  | -0.28493 | 2.29E-06 | 2.93E-06 |
| Wrn      | -0.38593 | 2.13E-06 | 2.72E-06 |
| Zfyve21  | -0.39998 | 2.12E-06 | 2.71E-06 |
| Mrm1     | -1.24237 | 2.10E-06 | 2.69E-06 |



|          |          |          |          |
|----------|----------|----------|----------|
| Btg1     | -0.15194 | 1.97E-06 | 2.52E-06 |
| Tmem223  | -0.25102 | 1.95E-06 | 2.49E-06 |
| Gpm6b    | -0.20049 | 1.95E-06 | 2.49E-06 |
| Galnt1   | -0.22715 | 1.92E-06 | 2.46E-06 |
| Mfsd5    | -0.50802 | 1.91E-06 | 2.45E-06 |
| Gm28661  | -1.12351 | 1.84E-06 | 2.36E-06 |
| Nt5dc1   | -0.56707 | 1.83E-06 | 2.35E-06 |
| mt-Ts1   | -1.09391 | 1.83E-06 | 2.35E-06 |
| Ppp2r2c  | -1.56813 | 1.82E-06 | 2.34E-06 |
| Wnk2     | -0.50702 | 1.75E-06 | 2.24E-06 |
| Mrps21   | -0.17962 | 1.69E-06 | 2.17E-06 |
| Tceal1   | -0.33955 | 1.66E-06 | 2.13E-06 |
| Acap2    | -0.24782 | 1.65E-06 | 2.12E-06 |
| Gm38056  | -1.66134 | 1.59E-06 | 2.04E-06 |
| Atg16l2  | -0.74815 | 1.54E-06 | 1.98E-06 |
| Clptm1l  | -0.31404 | 1.52E-06 | 1.95E-06 |
| Impdh2   | -0.34235 | 1.41E-06 | 1.82E-06 |
| Anks6    | -1.55156 | 1.42E-06 | 1.82E-06 |
| Chmp7    | -0.39149 | 1.40E-06 | 1.80E-06 |
| Tenm3    | -1.09399 | 1.40E-06 | 1.80E-06 |
| Phkb     | -0.41192 | 1.35E-06 | 1.74E-06 |
| Gpr137   | -0.52029 | 1.34E-06 | 1.72E-06 |
| Marchf2  | -0.21267 | 1.33E-06 | 1.71E-06 |
| Rnf166   | -0.36912 | 1.32E-06 | 1.70E-06 |
| Mrln     | -1.22164 | 1.30E-06 | 1.68E-06 |
| Ftl1-ps1 | -0.8659  | 1.29E-06 | 1.66E-06 |
| D630024D | -1.64359 | 1.22E-06 | 1.57E-06 |
| Ddx3x    | -0.14626 | 1.19E-06 | 1.53E-06 |
| Slc43a2  | -0.50042 | 1.19E-06 | 1.53E-06 |
| Gm6937   | -0.66214 | 1.18E-06 | 1.52E-06 |
| Gm17823  | -1.40866 | 1.18E-06 | 1.52E-06 |
| Reep4    | -0.77625 | 1.17E-06 | 1.51E-06 |
| B3gat1   | -1.09532 | 1.14E-06 | 1.48E-06 |
| Gm42651  | -1.45733 | 1.08E-06 | 1.39E-06 |
| Gm10177  | -0.70437 | 1.07E-06 | 1.38E-06 |
| Snrpb2   | -0.27363 | 1.05E-06 | 1.36E-06 |
| Dnajb11  | -0.24443 | 1.05E-06 | 1.36E-06 |
| Nr1h3    | -0.84773 | 1.04E-06 | 1.35E-06 |
| Gm7536   | -1.27077 | 1.03E-06 | 1.33E-06 |
| Kxd1     | -0.31162 | 9.92E-07 | 1.28E-06 |
| Pou2f2   | -0.83171 | 9.44E-07 | 1.22E-06 |
| Itgb1bp1 | -0.36868 | 9.07E-07 | 1.17E-06 |
| Epb41l1  | -0.48897 | 8.52E-07 | 1.10E-06 |
| Gm13611  | -0.7238  | 8.45E-07 | 1.09E-06 |
| Flot2    | -0.43196 | 8.28E-07 | 1.07E-06 |
| Hdgf     | -0.17341 | 8.03E-07 | 1.04E-06 |
| Mllt11   | -0.62616 | 7.55E-07 | 9.78E-07 |

|           |          |          |          |
|-----------|----------|----------|----------|
| Ppp1r15b  | -0.31311 | 7.51E-07 | 9.73E-07 |
| Psmc13    | -0.23866 | 7.49E-07 | 9.71E-07 |
| Chmp6     | -0.36399 | 7.43E-07 | 9.62E-07 |
| 2210016F  | -0.49146 | 7.28E-07 | 9.43E-07 |
| Sptlc1    | -0.39072 | 7.19E-07 | 9.32E-07 |
| Rai2      | -1.24068 | 7.06E-07 | 9.14E-07 |
| Cst6      | -1.26271 | 7.04E-07 | 9.13E-07 |
| Gm15542   | -0.99119 | 7.02E-07 | 9.09E-07 |
| Pcbd1     | -1.58137 | 7.01E-07 | 9.09E-07 |
| Crygc     | -0.95557 | 6.98E-07 | 9.05E-07 |
| Nudt12    | -0.76187 | 6.88E-07 | 8.92E-07 |
| Spcs1     | -0.18502 | 6.75E-07 | 8.75E-07 |
| Gm38372   | -1.06871 | 6.74E-07 | 8.75E-07 |
| mt-Tg     | -0.74465 | 6.71E-07 | 8.70E-07 |
| Ttyh2     | -0.4288  | 6.64E-07 | 8.61E-07 |
| Kcna6     | -1.44914 | 6.65E-07 | 8.62E-07 |
| Gm45220   | -0.69228 | 6.44E-07 | 8.36E-07 |
| Zfp248    | -0.63213 | 6.25E-07 | 8.11E-07 |
| Gm42699   | -1.07539 | 6.03E-07 | 7.83E-07 |
| Rps27a-ps | -0.55059 | 5.86E-07 | 7.62E-07 |
| Poglut1   | -0.38359 | 5.85E-07 | 7.61E-07 |
| Ager      | -1.28192 | 5.85E-07 | 7.60E-07 |
| Washc2    | -0.283   | 5.81E-07 | 7.55E-07 |
| Mcm5      | -1.37067 | 5.62E-07 | 7.31E-07 |
| Pigk      | -0.33919 | 5.37E-07 | 6.98E-07 |
| Crygd     | -1.26951 | 5.33E-07 | 6.94E-07 |
| Gm36298   | -1.26452 | 5.11E-07 | 6.65E-07 |
| mt-Te     | -1.24753 | 4.98E-07 | 6.48E-07 |
| Fahd2a    | -0.47293 | 4.92E-07 | 6.41E-07 |
| Zbtb14    | -0.39704 | 4.89E-07 | 6.37E-07 |
| Snca      | -1.38148 | 4.79E-07 | 6.23E-07 |
| Ptpn18    | -0.37006 | 4.70E-07 | 6.13E-07 |
| Gcdh      | -0.678   | 4.65E-07 | 6.06E-07 |
| Gm29237   | -1.30517 | 4.61E-07 | 6.01E-07 |
| Igsf9b    | -1.13484 | 4.54E-07 | 5.92E-07 |
| mt-Tt     | -1.47349 | 4.50E-07 | 5.87E-07 |
| Vav3      | -1.67028 | 4.31E-07 | 5.62E-07 |
| Hnrnp2    | -0.21521 | 4.27E-07 | 5.58E-07 |
| Sgpl1     | -0.56145 | 4.22E-07 | 5.51E-07 |
| Cd37      | -1.30311 | 4.24E-07 | 5.54E-07 |
| Idi1      | -0.40097 | 3.51E-07 | 4.59E-07 |
| Gga2      | -0.68983 | 3.49E-07 | 4.57E-07 |
| Creg1     | -0.29053 | 3.48E-07 | 4.55E-07 |
| Cadps2    | -1.42876 | 3.35E-07 | 4.39E-07 |
| Pitpnc1   | -0.17388 | 3.33E-07 | 4.37E-07 |
| Adar      | -0.35551 | 3.32E-07 | 4.34E-07 |
| Csnk1g3   | -0.28393 | 3.31E-07 | 4.33E-07 |

|           |          |          |          |
|-----------|----------|----------|----------|
| Per2      | -0.6962  | 3.30E-07 | 4.32E-07 |
| Rsph10b   | -1.20443 | 3.30E-07 | 4.32E-07 |
| Sptbn4    | -1.5558  | 3.24E-07 | 4.25E-07 |
| Wdr37     | -0.27257 | 3.21E-07 | 4.20E-07 |
| Ccni      | -0.19007 | 3.16E-07 | 4.14E-07 |
| Jph4      | -1.74088 | 2.89E-07 | 3.79E-07 |
| Tram1     | -0.22907 | 2.81E-07 | 3.69E-07 |
| Arl1      | -0.20106 | 2.77E-07 | 3.64E-07 |
| Abcb1b    | -1.74793 | 2.76E-07 | 3.63E-07 |
| Enox2     | -0.59976 | 2.73E-07 | 3.59E-07 |
| Eif4e3    | -0.39965 | 2.72E-07 | 3.57E-07 |
| Rwdd2a    | -1.30314 | 2.69E-07 | 3.53E-07 |
| Parp3     | -0.58123 | 2.67E-07 | 3.50E-07 |
| Cybb      | -2.6987  | 2.65E-07 | 3.48E-07 |
| H2-DMa    | -1.01859 | 2.60E-07 | 3.42E-07 |
| Rgs7      | -1.04937 | 2.59E-07 | 3.41E-07 |
| Psmc1     | -0.23527 | 2.55E-07 | 3.36E-07 |
| Rnf4      | -0.28526 | 2.55E-07 | 3.36E-07 |
| Rab9      | -0.27268 | 2.54E-07 | 3.34E-07 |
| Cela1     | -1.6574  | 2.48E-07 | 3.26E-07 |
| Gria1     | -1.76126 | 2.42E-07 | 3.18E-07 |
| Tmbim6    | -0.13077 | 2.36E-07 | 3.11E-07 |
| Nbn       | -0.47039 | 2.30E-07 | 3.03E-07 |
| Ermp1     | -0.52347 | 2.22E-07 | 2.93E-07 |
| Pepd      | -0.55523 | 2.22E-07 | 2.93E-07 |
| Arhgap45  | -2.33382 | 2.22E-07 | 2.92E-07 |
| Aurkaip1  | -0.21124 | 2.20E-07 | 2.90E-07 |
| Pfkfb3    | -0.69432 | 2.18E-07 | 2.87E-07 |
| Ankrd28   | -0.33229 | 2.17E-07 | 2.87E-07 |
| Slc22a23  | -1.94472 | 2.18E-07 | 2.87E-07 |
| Slc35g2   | -0.88414 | 2.14E-07 | 2.82E-07 |
| Hcn2      | -0.57303 | 2.12E-07 | 2.79E-07 |
| Babam1    | -0.3207  | 2.11E-07 | 2.79E-07 |
| Zfp651    | -0.4621  | 2.05E-07 | 2.70E-07 |
| Tph2      | -1.86933 | 2.02E-07 | 2.67E-07 |
| Ulk2      | -0.32384 | 1.92E-07 | 2.54E-07 |
| Gm11837   | -1.78984 | 1.89E-07 | 2.50E-07 |
| Gm48700   | -1.39711 | 1.86E-07 | 2.46E-07 |
| Rps16-ps2 | -1.23085 | 1.81E-07 | 2.39E-07 |
| Ampd2     | -0.62782 | 1.79E-07 | 2.37E-07 |
| Cnppd1    | -0.38137 | 1.78E-07 | 2.36E-07 |
| Ube2ql1   | -1.48619 | 1.79E-07 | 2.36E-07 |
| Armc10    | -0.46415 | 1.75E-07 | 2.32E-07 |
| 2010315B  | -0.44946 | 1.75E-07 | 2.32E-07 |
| Etv5      | -0.65108 | 1.63E-07 | 2.16E-07 |
| Kars      | -0.3339  | 1.63E-07 | 2.16E-07 |
| Dner      | -1.58328 | 1.61E-07 | 2.13E-07 |

|          |          |          |          |
|----------|----------|----------|----------|
| Lrrc70   | -1.24971 | 1.58E-07 | 2.09E-07 |
| Zfp764   | -0.81211 | 1.53E-07 | 2.03E-07 |
| Alg9     | -0.69664 | 1.48E-07 | 1.97E-07 |
| Pdxdc1   | -0.27731 | 1.45E-07 | 1.92E-07 |
| Ptges3l  | -1.74077 | 1.39E-07 | 1.85E-07 |
| Zbtb7a   | -0.19057 | 1.37E-07 | 1.82E-07 |
| Khnyln   | -0.37618 | 1.36E-07 | 1.80E-07 |
| Cd14     | -0.91843 | 1.33E-07 | 1.76E-07 |
| Vsnl1    | -1.89876 | 1.32E-07 | 1.75E-07 |
| Rfxank   | -0.61941 | 1.29E-07 | 1.72E-07 |
| Edem1    | -0.47178 | 1.27E-07 | 1.69E-07 |
| Gtdc1    | -0.49597 | 1.26E-07 | 1.67E-07 |
| Vegfb    | -0.31718 | 1.25E-07 | 1.66E-07 |
| Rph3al   | -0.86473 | 1.19E-07 | 1.59E-07 |
| Sertad3  | -0.52555 | 1.18E-07 | 1.57E-07 |
| Trir     | -0.17821 | 1.15E-07 | 1.53E-07 |
| Mydgf    | -0.26579 | 1.10E-07 | 1.47E-07 |
| Chek2    | -1.15101 | 1.10E-07 | 1.46E-07 |
| Sdhb     | -0.23313 | 1.02E-07 | 1.37E-07 |
| Zik1     | -1.90196 | 1.02E-07 | 1.36E-07 |
| Dok6     | -1.71004 | 1.02E-07 | 1.36E-07 |
| Bag2     | -0.70905 | 9.52E-08 | 1.27E-07 |
| Shank2   | -0.94312 | 9.24E-08 | 1.23E-07 |
| Stk3     | -0.36369 | 9.11E-08 | 1.22E-07 |
| B3gnt9   | -1.42673 | 8.61E-08 | 1.15E-07 |
| Gm43260  | -0.90006 | 8.51E-08 | 1.14E-07 |
| Nfam1    | -2.39596 | 8.41E-08 | 1.12E-07 |
| Mcf2l    | -0.19685 | 8.03E-08 | 1.07E-07 |
| Atcay    | -1.73883 | 7.38E-08 | 9.87E-08 |
| Apmmap   | -0.46147 | 6.91E-08 | 9.24E-08 |
| St3gal4  | -0.58256 | 6.87E-08 | 9.19E-08 |
| Ap4s1    | -0.24693 | 6.71E-08 | 8.98E-08 |
| Traf7    | -0.35492 | 6.05E-08 | 8.11E-08 |
| Mrpl30   | -0.23825 | 6.04E-08 | 8.09E-08 |
| Map2k5   | -0.52357 | 6.03E-08 | 8.09E-08 |
| Slc1a4   | -1.14475 | 5.95E-08 | 7.98E-08 |
| Traf3ip2 | -1.6729  | 5.75E-08 | 7.72E-08 |
| Fam32a   | -0.24029 | 5.22E-08 | 7.01E-08 |
| Gm2115   | -1.71194 | 5.18E-08 | 6.96E-08 |
| Ranbp17  | -1.84517 | 5.14E-08 | 6.91E-08 |
| Sra1     | -0.30714 | 4.86E-08 | 6.53E-08 |
| Fgf12    | -1.58205 | 4.86E-08 | 6.54E-08 |
| Rnpep    | -0.38609 | 4.74E-08 | 6.37E-08 |
| Ppp2r1b  | -1.02127 | 4.68E-08 | 6.29E-08 |
| Usp24    | -0.34994 | 4.67E-08 | 6.28E-08 |
| Phf2     | -0.29554 | 4.66E-08 | 6.26E-08 |
| Rab27b   | -0.74055 | 4.55E-08 | 6.12E-08 |

|           |          |          |          |
|-----------|----------|----------|----------|
| Echdc3    | -2.03881 | 4.48E-08 | 6.03E-08 |
| Smarca1   | -0.98305 | 4.40E-08 | 5.93E-08 |
| 3830406C  | -0.32286 | 4.06E-08 | 5.47E-08 |
| 9530097N  | -1.44052 | 4.07E-08 | 5.48E-08 |
| Acsl4     | -0.48141 | 4.04E-08 | 5.44E-08 |
| D430040D  | -1.27866 | 3.99E-08 | 5.38E-08 |
| Mindy2    | -0.17775 | 3.93E-08 | 5.30E-08 |
| Gm43843   | -1.29032 | 3.93E-08 | 5.30E-08 |
| Cope      | -0.21862 | 3.60E-08 | 4.86E-08 |
| Garnl3    | -1.30354 | 3.61E-08 | 4.86E-08 |
| Cdk15     | -1.85643 | 3.58E-08 | 4.83E-08 |
| Manbal    | -0.35744 | 3.54E-08 | 4.78E-08 |
| 1010001B  | -1.13034 | 3.47E-08 | 4.69E-08 |
| Gm10925   | -1.28658 | 3.44E-08 | 4.65E-08 |
| Zmiz2     | -0.35334 | 3.40E-08 | 4.58E-08 |
| Tfap2b    | -1.29993 | 3.40E-08 | 4.59E-08 |
| Pvalb     | -2.02842 | 3.37E-08 | 4.55E-08 |
| Tmem35b   | -0.87627 | 3.27E-08 | 4.42E-08 |
| Cenpx     | -0.26795 | 3.11E-08 | 4.20E-08 |
| Ppt1      | -0.29058 | 3.05E-08 | 4.12E-08 |
| Dusp4     | -1.95768 | 3.01E-08 | 4.07E-08 |
| Abca3     | -0.33469 | 2.97E-08 | 4.01E-08 |
| Mageh1    | -0.30792 | 2.93E-08 | 3.97E-08 |
| Armxc6    | -0.90018 | 2.88E-08 | 3.90E-08 |
| Nxph4     | -1.3648  | 2.83E-08 | 3.82E-08 |
| Ryr2      | -1.13254 | 2.82E-08 | 3.81E-08 |
| Nudt19    | -0.51669 | 2.79E-08 | 3.78E-08 |
| Anks1b    | -1.90747 | 2.74E-08 | 3.70E-08 |
| Rac3      | -1.15281 | 2.68E-08 | 3.62E-08 |
| Fam72a    | -1.15909 | 2.65E-08 | 3.59E-08 |
| Ccs       | -0.34293 | 2.55E-08 | 3.46E-08 |
| Ppard     | -0.31141 | 2.54E-08 | 3.44E-08 |
| Dhx32     | -0.45877 | 2.38E-08 | 3.22E-08 |
| Lhx4      | -0.92402 | 2.31E-08 | 3.14E-08 |
| Gm42696   | -1.67601 | 2.31E-08 | 3.13E-08 |
| 4933415A  | -1.84918 | 2.25E-08 | 3.05E-08 |
| Gmip      | -1.03979 | 2.19E-08 | 2.98E-08 |
| Ctf1      | -0.9949  | 2.16E-08 | 2.93E-08 |
| Gosr2     | -0.36737 | 2.13E-08 | 2.89E-08 |
| Nelfb     | -0.33603 | 2.01E-08 | 2.73E-08 |
| Cnksr3    | -0.58207 | 1.98E-08 | 2.69E-08 |
| Snrpn     | -0.41515 | 1.96E-08 | 2.67E-08 |
| Mypopos   | -1.76089 | 1.85E-08 | 2.52E-08 |
| Tmem219   | -0.41401 | 1.80E-08 | 2.45E-08 |
| Tcf25     | -0.16474 | 1.78E-08 | 2.42E-08 |
| Zfp948    | -0.63029 | 1.78E-08 | 2.42E-08 |
| Gabarapl2 | -0.16342 | 1.76E-08 | 2.40E-08 |

|           |          |          |          |
|-----------|----------|----------|----------|
| H13       | -0.28514 | 1.75E-08 | 2.38E-08 |
| Krt222    | -1.28447 | 1.66E-08 | 2.26E-08 |
| Pxmp2     | -0.74353 | 1.65E-08 | 2.24E-08 |
| Zdhhc14   | -0.76228 | 1.62E-08 | 2.21E-08 |
| Calb1     | -1.86214 | 1.61E-08 | 2.20E-08 |
| Nacc1     | -0.39604 | 1.60E-08 | 2.18E-08 |
| Fermt3    | -1.44821 | 1.59E-08 | 2.17E-08 |
| Hs3st4    | -2.06167 | 1.59E-08 | 2.16E-08 |
| Sapcd1    | -0.87573 | 1.52E-08 | 2.08E-08 |
| Rhbdd1    | -0.56987 | 1.49E-08 | 2.04E-08 |
| Hpca      | -1.85119 | 1.50E-08 | 2.04E-08 |
| Ipo11     | -0.48628 | 1.42E-08 | 1.94E-08 |
| Gm16740   | -1.12967 | 1.41E-08 | 1.92E-08 |
| Grip2     | -1.57872 | 1.40E-08 | 1.91E-08 |
| O610009E1 | -0.76748 | 1.38E-08 | 1.88E-08 |
| Map3k1    | -0.25068 | 1.36E-08 | 1.86E-08 |
| Cox14     | -0.21532 | 1.35E-08 | 1.84E-08 |
| Echdc2    | -1.68699 | 1.36E-08 | 1.85E-08 |
| Prkag3    | -2.12404 | 1.35E-08 | 1.85E-08 |
| Washc3    | -0.41968 | 1.32E-08 | 1.80E-08 |
| mt-Td     | -0.98619 | 1.32E-08 | 1.80E-08 |
| Lta4h     | -0.34569 | 1.31E-08 | 1.80E-08 |
| Ttc39b    | -0.41574 | 1.31E-08 | 1.80E-08 |
| Rimbp2    | -2.02408 | 1.32E-08 | 1.80E-08 |
| Gm4332    | -0.80249 | 1.28E-08 | 1.74E-08 |
| Sppl3     | -0.34273 | 1.25E-08 | 1.71E-08 |
| Slc5a3    | -0.54475 | 1.22E-08 | 1.68E-08 |
| Rreb1     | -0.35344 | 1.13E-08 | 1.55E-08 |
| Psmc3     | -0.30378 | 1.11E-08 | 1.52E-08 |
| B930095G  | -0.64074 | 1.10E-08 | 1.51E-08 |
| Tmem94    | -0.48744 | 1.07E-08 | 1.47E-08 |
| Mfsd14a   | -0.33884 | 1.07E-08 | 1.46E-08 |
| Ggact     | -0.44295 | 1.07E-08 | 1.46E-08 |
| Gdpd3     | -1.54294 | 1.07E-08 | 1.47E-08 |
| Pex6      | -0.47558 | 1.06E-08 | 1.45E-08 |
| Bicra     | -0.63588 | 1.02E-08 | 1.40E-08 |
| H2ac24    | -1.2995  | 9.63E-09 | 1.32E-08 |
| Pag1      | -0.71498 | 9.07E-09 | 1.24E-08 |
| Smoc1     | -2.03849 | 9.00E-09 | 1.24E-08 |
| Clec2l    | -1.94758 | 9.00E-09 | 1.24E-08 |
| Gm41517   | -1.67578 | 8.90E-09 | 1.22E-08 |
| Gsto1     | -1.01784 | 8.75E-09 | 1.20E-08 |
| 93301620  | -1.65214 | 8.61E-09 | 1.18E-08 |
| Atp6v1g1  | -0.16629 | 8.25E-09 | 1.13E-08 |
| Rab40b    | -1.69769 | 7.92E-09 | 1.09E-08 |
| Txnrd1    | -0.3401  | 7.50E-09 | 1.03E-08 |
| Ncf4      | -3.57029 | 7.37E-09 | 1.01E-08 |

|          |          |          |          |
|----------|----------|----------|----------|
| Hpgds    | -1.48711 | 7.11E-09 | 9.78E-09 |
| Gm42701  | -1.10714 | 6.75E-09 | 9.30E-09 |
| Gm49058  | -1.80999 | 6.71E-09 | 9.24E-09 |
| Apba1    | -0.7986  | 6.64E-09 | 9.15E-09 |
| Wwp2     | -0.46254 | 6.38E-09 | 8.80E-09 |
| Retsat   | -0.82614 | 6.04E-09 | 8.33E-09 |
| Sema5b   | -1.51457 | 6.05E-09 | 8.35E-09 |
| Rorc     | -1.67731 | 5.72E-09 | 7.90E-09 |
| Gm12097  | -1.99251 | 5.68E-09 | 7.84E-09 |
| Ly6g6d   | -1.98665 | 5.29E-09 | 7.30E-09 |
| Spaca6   | -0.50126 | 5.22E-09 | 7.20E-09 |
| Kcnn2    | -2.12412 | 5.19E-09 | 7.17E-09 |
| Proca1   | -1.87442 | 4.96E-09 | 6.85E-09 |
| Cdr1os   | -0.50474 | 4.88E-09 | 6.74E-09 |
| Gm42702  | -0.78041 | 4.80E-09 | 6.63E-09 |
| A930005H | -0.41317 | 4.63E-09 | 6.41E-09 |
| Gm17971  | -1.96486 | 4.60E-09 | 6.37E-09 |
| Nova1    | -1.44481 | 4.43E-09 | 6.13E-09 |
| Tmem178l | -1.17539 | 4.32E-09 | 5.98E-09 |
| Pacs1    | -0.3884  | 4.28E-09 | 5.93E-09 |
| Strip2   | -1.10377 | 4.29E-09 | 5.94E-09 |
| Ssrp1    | -0.26484 | 4.21E-09 | 5.83E-09 |
| Fbxw8    | -0.501   | 4.16E-09 | 5.76E-09 |
| Rap1gap2 | -1.77227 | 4.06E-09 | 5.63E-09 |
| Ahdcd1   | -0.45935 | 4.03E-09 | 5.58E-09 |
| Crygb    | -1.00089 | 4.01E-09 | 5.56E-09 |
| Cibar1   | -0.366   | 3.94E-09 | 5.46E-09 |
| Herpud2  | -0.31265 | 3.64E-09 | 5.05E-09 |
| Fbxw11   | -0.34575 | 3.51E-09 | 4.87E-09 |
| Galnt13  | -0.59662 | 3.51E-09 | 4.86E-09 |
| Smc2     | -0.71085 | 3.37E-09 | 4.67E-09 |
| Fam20b   | -0.45009 | 3.36E-09 | 4.67E-09 |
| Tmem30a  | -0.18637 | 3.35E-09 | 4.66E-09 |
| Tenm4    | -0.95652 | 3.31E-09 | 4.60E-09 |
| Bckdhd1  | -1.1465  | 3.18E-09 | 4.41E-09 |
| Odad1    | -1.82124 | 3.17E-09 | 4.41E-09 |
| Psmb7    | -0.24695 | 3.13E-09 | 4.36E-09 |
| Cited1   | -1.52437 | 3.14E-09 | 4.36E-09 |
| Arhgef1  | -0.27981 | 3.06E-09 | 4.25E-09 |
| Cryaa    | -0.87272 | 2.97E-09 | 4.13E-09 |
| Six4     | -1.50856 | 2.96E-09 | 4.11E-09 |
| Crybb2   | -0.67848 | 2.86E-09 | 3.97E-09 |
| Fam155a  | -2.01356 | 2.85E-09 | 3.96E-09 |
| Fmnl1    | -2.75209 | 2.78E-09 | 3.87E-09 |
| Etfa     | -0.32524 | 2.69E-09 | 3.75E-09 |
| Chmp4b   | -0.21125 | 2.69E-09 | 3.75E-09 |
| Mif      | -0.17531 | 2.64E-09 | 3.68E-09 |

|           |          |          |          |
|-----------|----------|----------|----------|
| FblI1     | -1.99057 | 2.64E-09 | 3.68E-09 |
| Exosc5    | -0.45925 | 2.56E-09 | 3.57E-09 |
| Vsx1      | -2.09881 | 2.53E-09 | 3.53E-09 |
| 2610012C  | -2.07901 | 2.51E-09 | 3.49E-09 |
| Uqcr10    | -0.16468 | 2.44E-09 | 3.40E-09 |
| Arhgef16  | -1.91923 | 2.38E-09 | 3.32E-09 |
| mt-Tn     | -0.94904 | 2.35E-09 | 3.28E-09 |
| Rep15     | -1.36567 | 2.24E-09 | 3.13E-09 |
| Gm9812    | -1.80366 | 2.22E-09 | 3.10E-09 |
| Ptpn6     | -2.58094 | 2.21E-09 | 3.09E-09 |
| Ociad2    | -1.62272 | 2.19E-09 | 3.06E-09 |
| Gm47479   | -1.22619 | 2.15E-09 | 3.01E-09 |
| Nus1      | -0.32976 | 1.97E-09 | 2.75E-09 |
| Atp8a1    | -0.27266 | 1.90E-09 | 2.66E-09 |
| Eif3m     | -0.2361  | 1.87E-09 | 2.62E-09 |
| Mark4     | -0.45611 | 1.84E-09 | 2.57E-09 |
| A230057D  | -1.15561 | 1.83E-09 | 2.56E-09 |
| Ttr       | -1.7355  | 1.82E-09 | 2.54E-09 |
| Gm43259   | -1.01681 | 1.79E-09 | 2.51E-09 |
| Usp22     | -0.34884 | 1.78E-09 | 2.48E-09 |
| Psd2      | -2.37215 | 1.79E-09 | 2.50E-09 |
| Mylk      | -0.27337 | 1.74E-09 | 2.44E-09 |
| Etfbkmt   | -1.662   | 1.70E-09 | 2.39E-09 |
| Abhd11os  | -1.72999 | 1.63E-09 | 2.28E-09 |
| Aamp      | -0.25366 | 1.57E-09 | 2.20E-09 |
| Lrch3     | -0.31905 | 1.50E-09 | 2.11E-09 |
| H2-Eb1    | -2.90866 | 1.49E-09 | 2.09E-09 |
| Zxdb      | -0.59158 | 1.38E-09 | 1.94E-09 |
| Hps1      | -1.36236 | 1.36E-09 | 1.91E-09 |
| Cartpt    | -1.73526 | 1.35E-09 | 1.90E-09 |
| Foxp4     | -1.04789 | 1.33E-09 | 1.86E-09 |
| Suox      | -0.987   | 1.30E-09 | 1.82E-09 |
| Prkcq     | -1.88887 | 1.27E-09 | 1.78E-09 |
| Rhno1     | -0.75878 | 1.23E-09 | 1.73E-09 |
| Taldo1    | -0.20656 | 1.22E-09 | 1.72E-09 |
| Nipal3    | -0.43779 | 1.17E-09 | 1.65E-09 |
| Cacnb1    | -2.33718 | 1.17E-09 | 1.64E-09 |
| Foxo4     | -0.67984 | 1.15E-09 | 1.62E-09 |
| Stk38     | -0.24097 | 1.14E-09 | 1.61E-09 |
| Chic2     | -0.29955 | 1.13E-09 | 1.59E-09 |
| Ap3s1     | -0.24958 | 1.07E-09 | 1.50E-09 |
| Slc35a4   | -0.4288  | 1.06E-09 | 1.49E-09 |
| Ppp1r18   | -0.4014  | 1.03E-09 | 1.45E-09 |
| Reps2     | -2.03493 | 1.03E-09 | 1.45E-09 |
| Park7     | -0.17122 | 1.01E-09 | 1.43E-09 |
| Larp1b    | -0.52743 | 9.93E-10 | 1.40E-09 |
| 6330403LC | -1.36277 | 9.73E-10 | 1.37E-09 |



|            |          |          |          |
|------------|----------|----------|----------|
| Zfp358     | -0.46144 | 9.35E-10 | 1.32E-09 |
| Clint1     | -0.32928 | 9.01E-10 | 1.27E-09 |
| Shkbp1     | -0.69997 | 8.93E-10 | 1.26E-09 |
| Fscn1      | -0.76799 | 8.92E-10 | 1.26E-09 |
| Hunk       | -1.31156 | 8.90E-10 | 1.26E-09 |
| Cbarp      | -1.07136 | 8.79E-10 | 1.24E-09 |
| Septin2-1  | -0.73967 | 8.64E-10 | 1.22E-09 |
| Kcnd3      | -2.24752 | 8.23E-10 | 1.16E-09 |
| Rin1       | -1.53193 | 8.10E-10 | 1.14E-09 |
| Prdm11     | -1.9564  | 7.94E-10 | 1.12E-09 |
| Cox17      | -0.23461 | 7.73E-10 | 1.09E-09 |
| Dohh       | -0.42727 | 7.67E-10 | 1.08E-09 |
| Focad      | -0.90161 | 7.47E-10 | 1.06E-09 |
| Dlg5       | -0.65525 | 7.25E-10 | 1.03E-09 |
| Crygs      | -1.23486 | 7.25E-10 | 1.03E-09 |
| Slc35d1    | -0.65681 | 7.14E-10 | 1.01E-09 |
| Tcea2      | -1.57612 | 7.12E-10 | 1.01E-09 |
| Wdr83os    | -0.27633 | 6.92E-10 | 9.79E-10 |
| Pebp1      | -0.17633 | 6.31E-10 | 8.93E-10 |
| Zfp277     | -0.56502 | 6.23E-10 | 8.82E-10 |
| Gm43305    | -1.12507 | 5.95E-10 | 8.43E-10 |
| Rtl5       | -1.9188  | 5.88E-10 | 8.32E-10 |
| Lmf1       | -0.84854 | 5.76E-10 | 8.17E-10 |
| 1500009C1  | -2.22168 | 5.79E-10 | 8.20E-10 |
| Xylt2      | -0.78976 | 5.40E-10 | 7.65E-10 |
| Rbl1       | -0.75717 | 5.20E-10 | 7.37E-10 |
| Mus81      | -0.80944 | 5.17E-10 | 7.33E-10 |
| Srm        | -0.70865 | 5.07E-10 | 7.19E-10 |
| Lage3      | -0.36028 | 5.01E-10 | 7.10E-10 |
| Kctd20     | -0.38534 | 4.86E-10 | 6.90E-10 |
| Scyl1      | -0.44622 | 4.85E-10 | 6.88E-10 |
| Rpl36a-ps2 | -1.43604 | 4.82E-10 | 6.84E-10 |
| Rps6-ps4   | -0.72247 | 4.69E-10 | 6.67E-10 |
| Hsd12      | -0.43093 | 4.66E-10 | 6.62E-10 |
| Ptpn13     | -0.80929 | 4.36E-10 | 6.20E-10 |
| Mfsd4a     | -0.5275  | 3.99E-10 | 5.67E-10 |
| Fam219a    | -0.55926 | 3.80E-10 | 5.40E-10 |
| 4930594V   | -1.35613 | 3.63E-10 | 5.17E-10 |
| Fam126a    | -0.50227 | 3.49E-10 | 4.98E-10 |
| Wscd2      | -1.61052 | 3.39E-10 | 4.83E-10 |
| Dnajc1     | -0.27921 | 3.31E-10 | 4.71E-10 |
| Sort1      | -0.34301 | 3.22E-10 | 4.59E-10 |
| Gm43258    | -1.64406 | 3.16E-10 | 4.50E-10 |
| Atg4a      | -0.71045 | 2.96E-10 | 4.23E-10 |
| Disp1      | -1.38485 | 2.96E-10 | 4.22E-10 |
| Lactb      | -0.41913 | 2.90E-10 | 4.14E-10 |
| Cog7       | -0.39132 | 2.88E-10 | 4.12E-10 |

|          |          |          |          |
|----------|----------|----------|----------|
| Rabl6    | -0.37281 | 2.85E-10 | 4.08E-10 |
| Paics    | -0.32461 | 2.74E-10 | 3.92E-10 |
| C4b      | -2.17039 | 2.78E-10 | 3.96E-10 |
| Lamtor2  | -0.22709 | 2.66E-10 | 3.81E-10 |
| 9630001P | -2.2283  | 2.70E-10 | 3.86E-10 |
| Saraf    | -0.23806 | 2.64E-10 | 3.77E-10 |
| Atp6v0a2 | -0.40621 | 2.61E-10 | 3.74E-10 |
| Smim15   | -0.32358 | 2.59E-10 | 3.70E-10 |
| Nexn     | -1.38793 | 2.55E-10 | 3.64E-10 |
| Metap2   | -0.20743 | 2.38E-10 | 3.41E-10 |
| Trhde    | -1.47458 | 2.38E-10 | 3.41E-10 |
| Xk       | -1.90137 | 2.34E-10 | 3.35E-10 |
| Mfsd6    | -0.43753 | 2.27E-10 | 3.25E-10 |
| Arhgap15 | -2.70796 | 2.15E-10 | 3.08E-10 |
| Cryba1   | -1.4422  | 2.03E-10 | 2.92E-10 |
| Dpp6     | -1.65599 | 1.89E-10 | 2.71E-10 |
| Dad1     | -0.18803 | 1.79E-10 | 2.57E-10 |
| Sh3rf3   | -2.60026 | 1.81E-10 | 2.60E-10 |
| Gm9800   | -0.94061 | 1.78E-10 | 2.55E-10 |
| Tfrc     | -0.25791 | 1.77E-10 | 2.54E-10 |
| Pipox    | -2.43    | 1.77E-10 | 2.54E-10 |
| Ndp      | -2.19861 | 1.76E-10 | 2.53E-10 |
| Mrpl35   | -0.43114 | 1.71E-10 | 2.46E-10 |
| Samsn1   | -0.81659 | 1.63E-10 | 2.34E-10 |
| Sugct    | -1.46321 | 1.57E-10 | 2.26E-10 |
| Gm19195  | -1.39479 | 1.55E-10 | 2.22E-10 |
| Pax6os1  | -1.42614 | 1.46E-10 | 2.10E-10 |
| Socs1    | -1.28336 | 1.43E-10 | 2.06E-10 |
| BC029722 | -0.44967 | 1.43E-10 | 2.05E-10 |
| Tmem175  | -0.83763 | 1.43E-10 | 2.06E-10 |
| F730043M | -2.03461 | 1.40E-10 | 2.01E-10 |
| Nat8f1   | -0.5605  | 1.36E-10 | 1.96E-10 |
| Pygo1    | -1.10404 | 1.28E-10 | 1.84E-10 |
| Meis3    | -1.31955 | 1.26E-10 | 1.81E-10 |
| Gpr157   | -1.50548 | 1.23E-10 | 1.78E-10 |
| Zfp69    | -1.14557 | 1.23E-10 | 1.77E-10 |
| Id4      | -1.52867 | 1.22E-10 | 1.77E-10 |
| Acot6    | -2.00802 | 1.20E-10 | 1.73E-10 |
| Rtn3     | -0.18868 | 1.13E-10 | 1.63E-10 |
| Tomm34   | -0.48781 | 1.11E-10 | 1.61E-10 |
| Gm43430  | -1.64086 | 1.02E-10 | 1.47E-10 |
| Kcnip4   | -1.89185 | 1.02E-10 | 1.48E-10 |
| Ttf2     | -1.62849 | 1.01E-10 | 1.45E-10 |
| Zfp664   | -0.27797 | 9.56E-11 | 1.38E-10 |
| Pcdhb9   | -2.58986 | 9.50E-11 | 1.37E-10 |
| Gnpda2   | -0.37054 | 9.27E-11 | 1.34E-10 |
| Bin3     | -0.65642 | 9.20E-11 | 1.33E-10 |

|           |          |          |          |
|-----------|----------|----------|----------|
| Met       | -2.51344 | 8.77E-11 | 1.27E-10 |
| Otulinl   | -1.82967 | 8.65E-11 | 1.25E-10 |
| Snu13     | -0.2393  | 8.48E-11 | 1.23E-10 |
| Nrxn1     | -1.76403 | 7.99E-11 | 1.16E-10 |
| Arvcf     | -0.62853 | 7.83E-11 | 1.13E-10 |
| Faap20    | -0.50859 | 7.62E-11 | 1.10E-10 |
| Gm17634   | -2.25158 | 7.61E-11 | 1.10E-10 |
| Cdh20     | -1.726   | 7.04E-11 | 1.02E-10 |
| Asap3     | -1.02567 | 6.82E-11 | 9.89E-11 |
| Tnfrsf12a | -0.53912 | 6.54E-11 | 9.49E-11 |
| Dennd4c   | -0.39446 | 6.36E-11 | 9.23E-11 |
| Kctd11    | -1.05362 | 6.29E-11 | 9.13E-11 |
| Mir670hg  | -1.53968 | 6.21E-11 | 9.01E-11 |
| Nhs       | -0.78067 | 6.15E-11 | 8.93E-11 |
| Nr1h4     | -2.55467 | 6.15E-11 | 8.93E-11 |
| Mgat2     | -0.37297 | 5.99E-11 | 8.69E-11 |
| Hif3a     | -2.32006 | 5.86E-11 | 8.52E-11 |
| Prss56    | -2.18072 | 5.80E-11 | 8.43E-11 |
| Gm43712   | -1.75405 | 5.71E-11 | 8.30E-11 |
| Mrps18c   | -0.32372 | 5.61E-11 | 8.16E-11 |
| Ptprc     | -2.57013 | 5.49E-11 | 7.97E-11 |
| Rps6ka5   | -0.51213 | 4.92E-11 | 7.16E-11 |
| Serp1     | -0.35053 | 4.90E-11 | 7.14E-11 |
| Psma2     | -0.21948 | 4.69E-11 | 6.82E-11 |
| Nkap      | -0.37918 | 4.54E-11 | 6.61E-11 |
| Slc17a8   | -2.29926 | 4.56E-11 | 6.64E-11 |
| Nipal2    | -1.28088 | 4.47E-11 | 6.52E-11 |
| Pdyn      | -2.43455 | 4.49E-11 | 6.53E-11 |
| Dennd11   | -0.80935 | 4.41E-11 | 6.42E-11 |
| Prxl2c    | -0.31755 | 4.36E-11 | 6.35E-11 |
| Il18      | -1.05375 | 4.38E-11 | 6.38E-11 |
| Mrfap1    | -0.18729 | 4.22E-11 | 6.15E-11 |
| Fbxo10    | -1.03605 | 3.87E-11 | 5.64E-11 |
| Nagk      | -0.55748 | 3.54E-11 | 5.17E-11 |
| Psph      | -0.48884 | 3.50E-11 | 5.11E-11 |
| Vars      | -0.65151 | 3.47E-11 | 5.06E-11 |
| Tff2      | -2.45628 | 3.32E-11 | 4.84E-11 |
| Gm26759   | -1.31709 | 3.19E-11 | 4.66E-11 |
| Rybp      | -0.34111 | 3.16E-11 | 4.62E-11 |
| Hps6      | -1.22189 | 3.18E-11 | 4.64E-11 |
| Slc47a2   | -1.89729 | 3.14E-11 | 4.59E-11 |
| Rac2      | -3.42289 | 3.07E-11 | 4.49E-11 |
| Stt3b     | -0.3145  | 2.97E-11 | 4.34E-11 |
| Actr3     | -0.26179 | 2.84E-11 | 4.16E-11 |
| Grin2b    | -2.31065 | 2.83E-11 | 4.14E-11 |
| Clca3a1   | -2.33903 | 2.66E-11 | 3.89E-11 |
| Xpnpep1   | -0.52185 | 2.53E-11 | 3.70E-11 |

|            |          |          |          |
|------------|----------|----------|----------|
| Chst1      | -2.10995 | 2.46E-11 | 3.60E-11 |
| Taok2      | -0.36612 | 2.38E-11 | 3.49E-11 |
| Fxyd3      | -2.39167 | 2.40E-11 | 3.51E-11 |
| Adi1       | -0.65046 | 2.32E-11 | 3.40E-11 |
| Pja2       | -0.25445 | 2.30E-11 | 3.37E-11 |
| Klf16      | -0.79316 | 2.19E-11 | 3.21E-11 |
| Hes5       | -0.7693  | 2.20E-11 | 3.23E-11 |
| 1700003F   | -2.69049 | 2.23E-11 | 3.27E-11 |
| Flot1      | -0.41289 | 2.18E-11 | 3.20E-11 |
| Jade2      | -0.50124 | 2.10E-11 | 3.09E-11 |
| St6galnac6 | -0.58748 | 2.09E-11 | 3.06E-11 |
| Tubg2      | -1.91143 | 2.07E-11 | 3.03E-11 |
| Lingo1     | -2.46408 | 2.02E-11 | 2.97E-11 |
| Sowaha     | -1.34737 | 1.99E-11 | 2.92E-11 |
| Ccl6       | -2.95236 | 1.98E-11 | 2.91E-11 |
| Znrf2      | -0.44192 | 1.71E-11 | 2.51E-11 |
| Gm31105    | -1.81006 | 1.69E-11 | 2.49E-11 |
| Gm45605    | -1.67876 | 1.61E-11 | 2.37E-11 |
| Gm37780    | -1.82234 | 1.54E-11 | 2.26E-11 |
| St3gal3    | -1.18901 | 1.50E-11 | 2.20E-11 |
| Slc35a1    | -0.46985 | 1.46E-11 | 2.15E-11 |
| Cntnap1    | -1.80874 | 1.46E-11 | 2.16E-11 |
| Fkbp14     | -0.83084 | 1.44E-11 | 2.12E-11 |
| Jakmip1    | -1.78249 | 1.44E-11 | 2.12E-11 |
| Pcdhb17    | -0.9206  | 1.37E-11 | 2.02E-11 |
| Hs1bp3     | -0.97399 | 1.33E-11 | 1.96E-11 |
| Reln       | -1.79297 | 1.22E-11 | 1.80E-11 |
| Cacnb3     | -1.32053 | 1.19E-11 | 1.75E-11 |
| Erp29      | -0.28092 | 1.18E-11 | 1.74E-11 |
| Scpep1     | -0.68975 | 1.14E-11 | 1.68E-11 |
| Gm8624     | -0.9124  | 9.22E-12 | 1.36E-11 |
| Mapk14     | -0.44804 | 8.94E-12 | 1.32E-11 |
| Arfip1     | -0.52093 | 8.95E-12 | 1.33E-11 |
| Drd2       | -1.97281 | 8.79E-12 | 1.30E-11 |
| Kirrel3    | -2.55036 | 8.75E-12 | 1.30E-11 |
| Snd1       | -0.61181 | 8.43E-12 | 1.25E-11 |
| Pak1ip1    | -0.31197 | 8.18E-12 | 1.21E-11 |
| Hddc2      | -0.61518 | 8.19E-12 | 1.21E-11 |
| Sphk1      | -2.33451 | 8.25E-12 | 1.22E-11 |
| Ap2s1      | -0.29581 | 7.88E-12 | 1.17E-11 |
| Nek8       | -1.77716 | 7.57E-12 | 1.12E-11 |
| Ina        | -1.32727 | 7.40E-12 | 1.10E-11 |
| Tagln3     | -0.86808 | 7.34E-12 | 1.09E-11 |
| Mmp16      | -2.40755 | 7.31E-12 | 1.09E-11 |
| Gm12607    | -2.20738 | 7.07E-12 | 1.05E-11 |
| Ttpal      | -0.77366 | 6.56E-12 | 9.74E-12 |
| Dock2      | -5.05053 | 6.30E-12 | 9.37E-12 |

|           |          |          |          |
|-----------|----------|----------|----------|
| Slc25a15  | -1.46093 | 6.18E-12 | 9.18E-12 |
| Nnat      | -1.06352 | 6.10E-12 | 9.07E-12 |
| Bend4     | -1.89825 | 6.01E-12 | 8.94E-12 |
| Pknx2     | -2.16253 | 5.82E-12 | 8.65E-12 |
| Stx8      | -0.41804 | 5.70E-12 | 8.48E-12 |
| Ubash3b   | -2.07316 | 5.76E-12 | 8.56E-12 |
| Mgrn1     | -0.46436 | 5.07E-12 | 7.55E-12 |
| Aph1b     | -0.76772 | 5.06E-12 | 7.53E-12 |
| Hdac11    | -0.88921 | 5.06E-12 | 7.53E-12 |
| Cmc1      | -0.50638 | 4.91E-12 | 7.31E-12 |
| Tcn2      | -0.37319 | 4.67E-12 | 6.95E-12 |
| Dnajb5    | -0.97584 | 4.64E-12 | 6.91E-12 |
| Parp4     | -0.42833 | 4.45E-12 | 6.63E-12 |
| Btbd11    | -2.40094 | 4.19E-12 | 6.25E-12 |
| Rasl10a   | -2.27836 | 4.05E-12 | 6.04E-12 |
| Sptssb    | -1.67356 | 4.02E-12 | 6.00E-12 |
| Plxnc1    | -1.22381 | 3.85E-12 | 5.75E-12 |
| Gm5292    | -0.90419 | 3.75E-12 | 5.60E-12 |
| Fndc5     | -1.68997 | 3.65E-12 | 5.45E-12 |
| Psmc2     | -0.30269 | 3.58E-12 | 5.35E-12 |
| mt-Ts2    | -1.18568 | 3.58E-12 | 5.35E-12 |
| Fbh1      | -0.57809 | 3.50E-12 | 5.23E-12 |
| Czib      | -0.41429 | 3.27E-12 | 4.90E-12 |
| Cntrl     | -0.56938 | 3.24E-12 | 4.85E-12 |
| Tlcd1     | -1.67555 | 3.27E-12 | 4.89E-12 |
| Eif5a2    | -0.89357 | 3.17E-12 | 4.74E-12 |
| Cd68      | -2.25487 | 3.07E-12 | 4.60E-12 |
| Ndufb7    | -0.19825 | 2.77E-12 | 4.15E-12 |
| Tceal3    | -0.63491 | 2.77E-12 | 4.15E-12 |
| Ndufc2    | -0.20573 | 2.48E-12 | 3.72E-12 |
| Lrfr4     | -1.5062  | 2.46E-12 | 3.69E-12 |
| Aass      | -1.83385 | 2.22E-12 | 3.33E-12 |
| Gm34455   | -1.30939 | 2.19E-12 | 3.29E-12 |
| Fat3      | -1.79133 | 2.13E-12 | 3.20E-12 |
| Obsl1     | -2.01122 | 2.14E-12 | 3.22E-12 |
| Ssh3      | -1.96913 | 2.12E-12 | 3.19E-12 |
| Gpr137b-p | -0.89429 | 2.10E-12 | 3.15E-12 |
| Bmp2k     | -0.52102 | 2.00E-12 | 3.01E-12 |
| Slc6a17   | -2.3898  | 1.88E-12 | 2.83E-12 |
| Ndst1     | -0.33405 | 1.81E-12 | 2.73E-12 |
| Loxl1     | -2.8477  | 1.82E-12 | 2.73E-12 |
| Fbn1      | -2.33165 | 1.73E-12 | 2.61E-12 |
| Cryz      | -0.88127 | 1.69E-12 | 2.55E-12 |
| Gfod2     | -0.77195 | 1.68E-12 | 2.52E-12 |
| Calb2     | -1.50561 | 1.67E-12 | 2.51E-12 |
| Rpl38-ps2 | -1.2523  | 1.64E-12 | 2.47E-12 |
| Frrs1l    | -1.9074  | 1.64E-12 | 2.47E-12 |

|           |          |          |          |
|-----------|----------|----------|----------|
| Ehhadh    | -2.59815 | 1.64E-12 | 2.47E-12 |
| Dpyd      | -1.90962 | 1.61E-12 | 2.43E-12 |
| Snapc5    | -0.36746 | 1.58E-12 | 2.37E-12 |
| Cks1b     | -1.42858 | 1.59E-12 | 2.39E-12 |
| Hepacam   | -2.16836 | 1.57E-12 | 2.37E-12 |
| Odr4      | -0.40842 | 1.51E-12 | 2.27E-12 |
| Gpd1l     | -0.66126 | 1.48E-12 | 2.24E-12 |
| Txndc12   | -0.48513 | 1.36E-12 | 2.06E-12 |
| Apba2     | -1.67385 | 1.30E-12 | 1.97E-12 |
| Eef1g     | -0.21165 | 1.27E-12 | 1.92E-12 |
| Dmtn      | -2.10682 | 1.26E-12 | 1.90E-12 |
| Chmp2a    | -0.21693 | 1.15E-12 | 1.74E-12 |
| Arhgef19  | -2.01131 | 1.09E-12 | 1.65E-12 |
| Gm19426   | -2.03482 | 1.07E-12 | 1.62E-12 |
| Rb1       | -0.39205 | 1.04E-12 | 1.58E-12 |
| Anks1     | -0.40393 | 1.04E-12 | 1.57E-12 |
| Tenm2     | -2.32357 | 1.05E-12 | 1.59E-12 |
| Brip1os   | -0.77835 | 1.02E-12 | 1.55E-12 |
| Bfsp2     | -2.83661 | 1.05E-12 | 1.59E-12 |
| Irf5      | -2.72229 | 9.64E-13 | 1.46E-12 |
| Kdelr3    | -2.18383 | 9.01E-13 | 1.36E-12 |
| Etv6      | -0.56372 | 8.48E-13 | 1.28E-12 |
| Eci1      | -0.38892 | 8.33E-13 | 1.26E-12 |
| Wars      | -0.49685 | 8.27E-13 | 1.25E-12 |
| Ap2a1     | -0.40327 | 7.72E-13 | 1.17E-12 |
| Zfp827    | -1.43105 | 7.72E-13 | 1.17E-12 |
| Mob3a     | -0.92564 | 7.54E-13 | 1.14E-12 |
| Calm2     | -0.18798 | 7.33E-13 | 1.11E-12 |
| Stat2     | -0.47512 | 7.25E-13 | 1.10E-12 |
| Nwd1      | -2.07203 | 7.37E-13 | 1.12E-12 |
| Polr2f    | -0.28998 | 7.17E-13 | 1.09E-12 |
| Spg21     | -0.48041 | 7.16E-13 | 1.09E-12 |
| Tvp23b    | -0.38778 | 7.09E-13 | 1.08E-12 |
| Ppp1cb    | -0.25104 | 6.93E-13 | 1.05E-12 |
| Pdgfc     | -2.32713 | 6.82E-13 | 1.04E-12 |
| Slit2     | -1.89793 | 6.66E-13 | 1.01E-12 |
| Ubtd2     | -1.74127 | 6.56E-13 | 9.97E-13 |
| Atg7      | -0.87663 | 6.27E-13 | 9.53E-13 |
| Atxn7l3   | -0.50802 | 6.13E-13 | 9.32E-13 |
| Slc2a3    | -1.54491 | 5.54E-13 | 8.43E-13 |
| Mpp3      | -2.30227 | 5.45E-13 | 8.29E-13 |
| 1110046JC | -1.59876 | 5.38E-13 | 8.19E-13 |
| mt-Tm     | -1.09594 | 4.86E-13 | 7.41E-13 |
| Elmo2     | -0.51181 | 4.27E-13 | 6.50E-13 |
| Sema4a    | -2.47707 | 4.28E-13 | 6.52E-13 |
| 2610001JC | -0.38024 | 4.15E-13 | 6.33E-13 |
| Ell2      | -0.75233 | 4.12E-13 | 6.28E-13 |

|           |          |          |          |
|-----------|----------|----------|----------|
| Ccl3      | -3.19419 | 4.13E-13 | 6.30E-13 |
| Sdsl      | -1.87059 | 4.06E-13 | 6.19E-13 |
| Pusl1     | -1.30299 | 3.94E-13 | 6.01E-13 |
| Tmem179l  | -0.5973  | 3.88E-13 | 5.92E-13 |
| Tspyl3    | -2.87063 | 3.52E-13 | 5.38E-13 |
| Ints6l    | -0.57093 | 3.38E-13 | 5.16E-13 |
| Tle2      | -0.9766  | 3.37E-13 | 5.16E-13 |
| Rad54b    | -0.77198 | 3.37E-13 | 5.15E-13 |
| Pde9a     | -2.60561 | 3.36E-13 | 5.14E-13 |
| Casp7     | -0.65356 | 3.21E-13 | 4.90E-13 |
| Card6     | -1.48234 | 2.99E-13 | 4.57E-13 |
| Npas3     | -1.79936 | 2.90E-13 | 4.44E-13 |
| Twf1      | -0.40389 | 2.74E-13 | 4.19E-13 |
| Derl1     | -0.41481 | 2.72E-13 | 4.16E-13 |
| Nol4      | -2.16915 | 2.75E-13 | 4.20E-13 |
| mt-Tp     | -1.38668 | 2.63E-13 | 4.02E-13 |
| Crmp1     | -1.47611 | 2.42E-13 | 3.70E-13 |
| Ggh       | -0.43679 | 2.29E-13 | 3.51E-13 |
| Marchf3   | -2.45524 | 2.34E-13 | 3.59E-13 |
| Vit       | -2.24523 | 2.25E-13 | 3.46E-13 |
| Fbxo7     | -0.55834 | 2.20E-13 | 3.37E-13 |
| E030030I0 | -1.50796 | 2.20E-13 | 3.38E-13 |
| Cct7      | -0.26016 | 2.15E-13 | 3.30E-13 |
| Unc119b   | -0.44257 | 2.14E-13 | 3.29E-13 |
| Agpat1    | -0.59531 | 2.13E-13 | 3.26E-13 |
| Agap2     | -2.19162 | 2.06E-13 | 3.16E-13 |
| Slc48a1   | -0.42907 | 1.90E-13 | 2.91E-13 |
| Tnik      | -1.0834  | 1.88E-13 | 2.89E-13 |
| Ttc12     | -1.19113 | 1.86E-13 | 2.86E-13 |
| Cd59b     | -2.61627 | 1.80E-13 | 2.78E-13 |
| Scube2    | -1.0861  | 1.75E-13 | 2.69E-13 |
| Atxn10    | -0.41359 | 1.69E-13 | 2.60E-13 |
| Eaf1      | -0.63549 | 1.62E-13 | 2.49E-13 |
| Macroh2a1 | -1.34458 | 1.62E-13 | 2.50E-13 |
| Ube2l3    | -0.29041 | 1.59E-13 | 2.44E-13 |
| Deptor    | -0.83999 | 1.60E-13 | 2.46E-13 |
| Nlgn3     | -1.50593 | 1.57E-13 | 2.42E-13 |
| Diaph1    | -0.35288 | 1.46E-13 | 2.25E-13 |
| Pou3f2    | -2.59443 | 1.50E-13 | 2.31E-13 |
| Cryba2    | -1.67037 | 1.49E-13 | 2.30E-13 |
| Gm10605   | -2.71451 | 1.43E-13 | 2.20E-13 |
| Mrps24    | -0.29175 | 1.33E-13 | 2.05E-13 |
| A730046J1 | -2.76604 | 1.29E-13 | 1.99E-13 |
| Kcnh2     | -1.88884 | 1.26E-13 | 1.95E-13 |
| Rgr       | -2.53672 | 1.26E-13 | 1.95E-13 |
| Hikeshi   | -0.44397 | 1.16E-13 | 1.79E-13 |
| Fah       | -1.52863 | 1.17E-13 | 1.81E-13 |

|           |          |          |          |
|-----------|----------|----------|----------|
| Aldh3b1   | -1.53767 | 1.09E-13 | 1.69E-13 |
| Lrrc66    | -1.99778 | 1.02E-13 | 1.58E-13 |
| Ikbkb     | -0.3795  | 9.95E-14 | 1.54E-13 |
| Lsm10     | -0.6941  | 9.85E-14 | 1.53E-13 |
| Pcgf3     | -0.59022 | 9.23E-14 | 1.43E-13 |
| Ccdc122   | -1.9365  | 9.41E-14 | 1.46E-13 |
| Rpl10-ps3 | -1.46782 | 9.34E-14 | 1.45E-13 |
| Eif1      | -0.13789 | 8.97E-14 | 1.39E-13 |
| 2610027Kl | -2.59092 | 9.29E-14 | 1.44E-13 |
| Gm9925    | -2.19797 | 9.08E-14 | 1.41E-13 |
| Dip2a     | -0.66255 | 8.21E-14 | 1.27E-13 |
| Sema3b    | -2.38733 | 8.40E-14 | 1.30E-13 |
| Tlcd3a    | -0.8826  | 7.93E-14 | 1.23E-13 |
| Csdc2     | -1.48491 | 7.90E-14 | 1.23E-13 |
| Ankrd13d  | -2.05962 | 7.76E-14 | 1.21E-13 |
| Pnmal1    | -1.82665 | 7.48E-14 | 1.16E-13 |
| Nradd     | -1.74225 | 7.39E-14 | 1.15E-13 |
| Chmp1a    | -0.50437 | 7.04E-14 | 1.09E-13 |
| Tnr       | -2.08413 | 7.02E-14 | 1.09E-13 |
| Capn12    | -2.43561 | 6.49E-14 | 1.01E-13 |
| Gm43794   | -1.03368 | 6.10E-14 | 9.49E-14 |
| Dach2     | -2.45161 | 5.47E-14 | 8.51E-14 |
| Tceal6    | -2.13457 | 4.95E-14 | 7.71E-14 |
| Smarca2   | -0.25937 | 4.77E-14 | 7.43E-14 |
| Itgb2     | -3.37059 | 4.93E-14 | 7.68E-14 |
| Ncs1      | -1.71517 | 4.65E-14 | 7.25E-14 |
| Kctd8     | -2.65431 | 4.70E-14 | 7.33E-14 |
| Sema4g    | -2.24847 | 4.39E-14 | 6.84E-14 |
| Zc3h12a   | -1.73968 | 4.03E-14 | 6.28E-14 |
| A830019Pi | -1.56564 | 3.95E-14 | 6.16E-14 |
| mt-Nd4l   | -1.00647 | 3.89E-14 | 6.07E-14 |
| Zdhhc8    | -0.62088 | 3.65E-14 | 5.70E-14 |
| Sec62     | -0.185   | 3.29E-14 | 5.14E-14 |
| Spi1      | -3.60373 | 3.40E-14 | 5.32E-14 |
| Ric8a     | -0.54431 | 2.86E-14 | 4.47E-14 |
| Hras      | -0.3692  | 2.79E-14 | 4.37E-14 |
| Rps10-ps2 | -1.03117 | 2.81E-14 | 4.39E-14 |
| Numa1     | -0.325   | 2.69E-14 | 4.22E-14 |
| Znrf3     | -0.71712 | 2.70E-14 | 4.22E-14 |
| Gmfg      | -3.33588 | 2.70E-14 | 4.22E-14 |
| Grik1     | -2.0726  | 2.64E-14 | 4.13E-14 |
| Dnajc8    | -0.2524  | 2.54E-14 | 3.98E-14 |
| Becn1     | -0.41208 | 2.36E-14 | 3.70E-14 |
| Kcnj9     | -1.98675 | 2.39E-14 | 3.74E-14 |
| Ebf4      | -2.4895  | 2.31E-14 | 3.63E-14 |
| Rasa3     | -1.41641 | 2.11E-14 | 3.31E-14 |
| Sgce      | -0.62911 | 2.00E-14 | 3.13E-14 |



|           |          |          |          |
|-----------|----------|----------|----------|
| Ncf1      | -3.87867 | 2.00E-14 | 3.13E-14 |
| Rnf180    | -2.57339 | 1.91E-14 | 3.00E-14 |
| Pcdhb7    | -2.28715 | 1.86E-14 | 2.92E-14 |
| Fkbp8     | -0.29401 | 1.78E-14 | 2.79E-14 |
| Thy1      | -2.04055 | 1.80E-14 | 2.83E-14 |
| Amfr      | -0.34664 | 1.68E-14 | 2.64E-14 |
| Astn1     | -2.03468 | 1.67E-14 | 2.63E-14 |
| Septin3   | -1.39263 | 1.64E-14 | 2.59E-14 |
| Tsen34    | -0.35069 | 1.62E-14 | 2.55E-14 |
| Lonrf2    | -1.78538 | 1.51E-14 | 2.38E-14 |
| 0610010K  | -0.52677 | 1.45E-14 | 2.28E-14 |
| Akt2      | -0.59034 | 1.41E-14 | 2.21E-14 |
| Rnf13     | -0.37221 | 1.39E-14 | 2.19E-14 |
| Gm42597   | -2.56122 | 1.38E-14 | 2.17E-14 |
| Plekha3   | -0.47172 | 1.34E-14 | 2.11E-14 |
| 1810058I2 | -0.35956 | 1.25E-14 | 1.97E-14 |
| Slc7a11   | -2.29715 | 1.25E-14 | 1.97E-14 |
| Tbl1x     | -0.31095 | 1.21E-14 | 1.91E-14 |
| Slc13a5   | -2.99827 | 1.25E-14 | 1.97E-14 |
| Pcx       | -1.36305 | 1.22E-14 | 1.92E-14 |
| Wbp1l     | -0.49144 | 1.16E-14 | 1.82E-14 |
| Tnnt1     | -1.62974 | 1.13E-14 | 1.79E-14 |
| Celsr2    | -0.86755 | 1.08E-14 | 1.71E-14 |
| Kctd2     | -0.43205 | 1.06E-14 | 1.67E-14 |
| Anapc11   | -0.31828 | 1.05E-14 | 1.66E-14 |
| Camk2n1   | -0.26697 | 9.95E-15 | 1.57E-14 |
| Abca6     | -1.94778 | 1.01E-14 | 1.59E-14 |
| Rgs13     | -1.97882 | 9.72E-15 | 1.54E-14 |
| Nxt2      | -0.72654 | 8.56E-15 | 1.35E-14 |
| Naglu     | -1.068   | 8.29E-15 | 1.31E-14 |
| Rph3a     | -1.28493 | 7.98E-15 | 1.26E-14 |
| Nptxr     | -2.01732 | 8.02E-15 | 1.27E-14 |
| Hspa1b    | -0.37739 | 7.73E-15 | 1.22E-14 |
| Cxcr4     | -3.35801 | 7.57E-15 | 1.20E-14 |
| Arrdc2    | -1.03737 | 7.29E-15 | 1.15E-14 |
| Zfpm2     | -2.16527 | 7.15E-15 | 1.13E-14 |
| Trp53i13  | -0.77965 | 6.79E-15 | 1.08E-14 |
| Zdhhc4    | -0.64484 | 6.74E-15 | 1.07E-14 |
| Bhlhe23   | -2.40251 | 6.61E-15 | 1.05E-14 |
| mt-Tv     | -1.11831 | 6.27E-15 | 9.95E-15 |
| Rnf182    | -2.36961 | 6.28E-15 | 9.96E-15 |
| Tspan5    | -0.263   | 6.09E-15 | 9.67E-15 |
| Cebpg     | -0.34646 | 5.94E-15 | 9.42E-15 |
| Caly      | -1.58235 | 5.93E-15 | 9.41E-15 |
| Mettl27   | -1.73295 | 5.68E-15 | 9.02E-15 |
| C230037L  | -2.40018 | 5.68E-15 | 9.02E-15 |
| Spcs3     | -0.56459 | 5.21E-15 | 8.27E-15 |

|           |          |          |          |
|-----------|----------|----------|----------|
| Scg2      | -0.99924 | 5.10E-15 | 8.10E-15 |
| C230086JC | -2.82033 | 5.14E-15 | 8.16E-15 |
| Eif4h     | -0.27147 | 4.53E-15 | 7.21E-15 |
| Scn2a     | -2.50277 | 4.29E-15 | 6.83E-15 |
| Eif1ax    | -0.35201 | 4.08E-15 | 6.50E-15 |
| Il17d     | -2.37718 | 4.21E-15 | 6.70E-15 |
| Aldh5a1   | -1.07639 | 4.09E-15 | 6.50E-15 |
| C1qtnf12  | -0.77039 | 4.06E-15 | 6.46E-15 |
| Hnmt      | -2.31223 | 4.15E-15 | 6.60E-15 |
| Cept1     | -0.47535 | 3.96E-15 | 6.31E-15 |
| Slc4a2    | -0.65495 | 3.95E-15 | 6.29E-15 |
| Dpy19l1   | -0.50128 | 3.85E-15 | 6.13E-15 |
| Slc43a3   | -2.73173 | 3.82E-15 | 6.08E-15 |
| Gatad1    | -0.3661  | 3.70E-15 | 5.90E-15 |
| Polr2e    | -0.29197 | 3.54E-15 | 5.64E-15 |
| Myt1l     | -2.3042  | 3.54E-15 | 5.64E-15 |
| Stac2     | -1.6253  | 3.48E-15 | 5.56E-15 |
| Fam219b   | -0.56501 | 3.30E-15 | 5.27E-15 |
| Nrbp1     | -0.3445  | 3.28E-15 | 5.24E-15 |
| Crybb1    | -2.25456 | 3.40E-15 | 5.42E-15 |
| Syn2      | -2.81285 | 3.27E-15 | 5.22E-15 |
| Tprn      | -1.36843 | 3.19E-15 | 5.09E-15 |
| Dhrs7     | -0.3674  | 2.99E-15 | 4.77E-15 |
| Tmem220   | -2.11957 | 3.01E-15 | 4.80E-15 |
| Rab5b     | -0.38635 | 2.85E-15 | 4.56E-15 |
| Nxpe3     | -2.66586 | 2.62E-15 | 4.19E-15 |
| Erich5    | -2.55367 | 2.64E-15 | 4.22E-15 |
| Gm43795   | -1.20306 | 2.57E-15 | 4.11E-15 |
| Tent5c    | -3.92498 | 2.58E-15 | 4.13E-15 |
| Col9a2    | -2.95611 | 2.52E-15 | 4.04E-15 |
| Slc6a8    | -0.72822 | 2.43E-15 | 3.89E-15 |
| Fcf1      | -0.55974 | 2.42E-15 | 3.87E-15 |
| Ctbs      | -0.82999 | 2.26E-15 | 3.62E-15 |
| Med12l    | -1.65208 | 2.12E-15 | 3.39E-15 |
| Apbb1ip   | -4.1091  | 2.13E-15 | 3.42E-15 |
| Trerf1    | -1.03009 | 1.80E-15 | 2.89E-15 |
| Pnck      | -2.35826 | 1.82E-15 | 2.91E-15 |
| Gm9794    | -0.77609 | 1.65E-15 | 2.65E-15 |
| Nme1      | -0.34783 | 1.61E-15 | 2.59E-15 |
| Snx18     | -0.4578  | 1.57E-15 | 2.53E-15 |
| Krt1      | -1.32747 | 1.58E-15 | 2.54E-15 |
| Nrcam     | -0.72728 | 1.53E-15 | 2.45E-15 |
| Klf15     | -1.46181 | 1.43E-15 | 2.30E-15 |
| Tfap4     | -1.43441 | 1.28E-15 | 2.06E-15 |
| Rsph9     | -2.05096 | 1.29E-15 | 2.08E-15 |
| Cpxm1     | -1.67438 | 1.28E-15 | 2.06E-15 |
| Tmem41a   | -1.24141 | 1.21E-15 | 1.95E-15 |

|          |          |          |          |
|----------|----------|----------|----------|
| Snx5     | -0.4177  | 1.18E-15 | 1.90E-15 |
| Rtkn     | -3.19685 | 1.21E-15 | 1.95E-15 |
| Gemin7   | -0.38594 | 1.15E-15 | 1.85E-15 |
| Gm32618  | -1.26644 | 1.13E-15 | 1.83E-15 |
| Col5a1   | -3.04369 | 1.14E-15 | 1.83E-15 |
| Tirap    | -0.6695  | 1.07E-15 | 1.72E-15 |
| Fam117a  | -1.96015 | 1.07E-15 | 1.73E-15 |
| Adamts18 | -1.89697 | 1.01E-15 | 1.63E-15 |
| Bola2    | -0.38953 | 9.73E-16 | 1.57E-15 |
| Aldh6a1  | -0.62522 | 9.68E-16 | 1.56E-15 |
| Gm43792  | -1.31201 | 9.68E-16 | 1.56E-15 |
| Arhgef25 | -0.65282 | 8.60E-16 | 1.39E-15 |
| Cox7c    | -0.20147 | 8.46E-16 | 1.37E-15 |
| Cryl1    | -1.73325 | 8.43E-16 | 1.36E-15 |
| Mboat1   | -2.24312 | 8.30E-16 | 1.34E-15 |
| Lsp1     | -3.0009  | 8.42E-16 | 1.36E-15 |
| Pisd     | -0.59973 | 7.82E-16 | 1.26E-15 |
| Mmp11    | -1.83018 | 7.96E-16 | 1.29E-15 |
| Atxn7l1  | -0.94369 | 7.47E-16 | 1.21E-15 |
| Nop10    | -0.301   | 7.33E-16 | 1.19E-15 |
| Emc3     | -0.39187 | 7.12E-16 | 1.15E-15 |
| Aspscr1  | -0.59891 | 6.58E-16 | 1.06E-15 |
| Lrrc49   | -0.44328 | 6.33E-16 | 1.03E-15 |
| Insyn2a  | -2.43244 | 5.61E-16 | 9.09E-16 |
| mt-Ta    | -1.1439  | 5.52E-16 | 8.95E-16 |
| Immp2l   | -0.87719 | 5.08E-16 | 8.24E-16 |
| Smapi    | -0.29113 | 4.38E-16 | 7.11E-16 |
| Gm42440  | -3.53614 | 4.49E-16 | 7.29E-16 |
| Bahd1    | -0.97314 | 4.30E-16 | 6.98E-16 |
| Tbc1d15  | -0.47401 | 4.21E-16 | 6.85E-16 |
| Rbbp8    | -0.92131 | 4.14E-16 | 6.73E-16 |
| Ap1g2    | -2.79685 | 4.18E-16 | 6.80E-16 |
| Bcorl1   | -0.81318 | 3.96E-16 | 6.44E-16 |
| Tmem250  | -0.66484 | 3.83E-16 | 6.24E-16 |
| Zc3hav1l | -2.64668 | 3.82E-16 | 6.22E-16 |
| Ndufa8   | -0.28609 | 3.56E-16 | 5.80E-16 |
| H2-Aa    | -3.16511 | 3.75E-16 | 6.10E-16 |
| Slc29a4  | -1.88489 | 3.55E-16 | 5.78E-16 |
| Gm45222  | -1.37757 | 3.46E-16 | 5.63E-16 |
| Itga2b   | -1.8727  | 3.38E-16 | 5.51E-16 |
| Cd53     | -4.02087 | 3.47E-16 | 5.66E-16 |
| Rab3c    | -1.82376 | 3.36E-16 | 5.48E-16 |
| St18     | -2.34244 | 3.35E-16 | 5.46E-16 |
| Smapi2   | -0.54148 | 3.19E-16 | 5.20E-16 |
| Omg      | -1.85503 | 3.19E-16 | 5.20E-16 |
| Cd300c2  | -3.88013 | 3.24E-16 | 5.29E-16 |
| Ctps2    | -0.93323 | 3.03E-16 | 4.95E-16 |

|          |          |          |          |
|----------|----------|----------|----------|
| Gfap     | -2.89047 | 3.04E-16 | 4.97E-16 |
| Anapc2   | -0.51932 | 2.86E-16 | 4.68E-16 |
| Rtf2     | -0.45184 | 2.79E-16 | 4.57E-16 |
| Haus3    | -0.75793 | 2.79E-16 | 4.55E-16 |
| Grm7     | -2.37976 | 2.83E-16 | 4.62E-16 |
| Agfg2    | -1.14212 | 2.67E-16 | 4.36E-16 |
| Bcat2    | -1.16151 | 2.59E-16 | 4.22E-16 |
| Arl2     | -0.45886 | 2.53E-16 | 4.14E-16 |
| Car8     | -1.62541 | 2.52E-16 | 4.12E-16 |
| Psmc3    | -0.30471 | 2.25E-16 | 3.69E-16 |
| Adamts4  | -3.48752 | 2.33E-16 | 3.81E-16 |
| Lgi4     | -2.61775 | 2.31E-16 | 3.77E-16 |
| Shisa8   | -2.44303 | 2.25E-16 | 3.68E-16 |
| Polr1d   | -0.30184 | 2.10E-16 | 3.45E-16 |
| Cryba4   | -2.16921 | 2.20E-16 | 3.60E-16 |
| 1600014C | -1.45883 | 2.12E-16 | 3.47E-16 |
| Eea1     | -0.3819  | 2.06E-16 | 3.38E-16 |
| Eif3b    | -0.43358 | 1.98E-16 | 3.24E-16 |
| Tmem131l | -2.03582 | 2.00E-16 | 3.28E-16 |
| Zfp300   | -3.37068 | 2.01E-16 | 3.29E-16 |
| Casd1    | -0.51883 | 1.76E-16 | 2.89E-16 |
| Pik3r5   | -3.67073 | 1.72E-16 | 2.82E-16 |
| Ccdc82   | -0.39512 | 1.55E-16 | 2.55E-16 |
| Ppp1r1b  | -1.60448 | 1.55E-16 | 2.55E-16 |
| Gna14    | -2.28154 | 1.53E-16 | 2.51E-16 |
| Dusp18   | -2.43917 | 1.49E-16 | 2.45E-16 |
| Camsap2  | -0.421   | 1.41E-16 | 2.32E-16 |
| Dbnl     | -0.53716 | 1.40E-16 | 2.30E-16 |
| Galm     | -1.98381 | 1.39E-16 | 2.29E-16 |
| Acss3    | -2.30248 | 1.36E-16 | 2.23E-16 |
| Nt5c     | -0.62297 | 1.28E-16 | 2.11E-16 |
| Zfp975   | -2.41063 | 1.26E-16 | 2.07E-16 |
| Mpg      | -0.7473  | 1.22E-16 | 2.01E-16 |
| Sema3e   | -1.77364 | 1.23E-16 | 2.03E-16 |
| Smim1    | -0.8446  | 1.19E-16 | 1.96E-16 |
| Cyp1b1   | -2.75564 | 1.21E-16 | 2.00E-16 |
| Lyz2     | -2.17725 | 1.18E-16 | 1.95E-16 |
| Tgif2    | -3.27291 | 1.17E-16 | 1.94E-16 |
| Mtus2    | -1.44172 | 1.12E-16 | 1.85E-16 |
| Gm20033  | -2.54015 | 1.10E-16 | 1.81E-16 |
| Gm8420   | -0.6439  | 1.02E-16 | 1.68E-16 |
| 9630050E | -1.01116 | 1.01E-16 | 1.67E-16 |
| Prdx5    | -0.29812 | 9.88E-17 | 1.63E-16 |
| Pcsk5    | -2.11858 | 1.01E-16 | 1.67E-16 |
| Tgfb3    | -2.02357 | 9.73E-17 | 1.61E-16 |
| Pank3    | -0.4682  | 9.21E-17 | 1.52E-16 |
| Flrt1    | -2.35579 | 9.41E-17 | 1.56E-16 |

|          |          |          |          |
|----------|----------|----------|----------|
| Cmb1     | -1.86838 | 9.27E-17 | 1.53E-16 |
| 4833422C | -1.42866 | 8.86E-17 | 1.47E-16 |
| Magi1    | -0.63747 | 8.70E-17 | 1.44E-16 |
| Pih1d1   | -0.64682 | 8.55E-17 | 1.42E-16 |
| Zfp46    | -0.85735 | 7.96E-17 | 1.32E-16 |
| Hivep3   | -1.01127 | 7.72E-17 | 1.28E-16 |
| 5330434G | -1.40484 | 7.61E-17 | 1.26E-16 |
| Ccdc149  | -2.32182 | 7.41E-17 | 1.23E-16 |
| Ptch1    | -0.45783 | 7.08E-17 | 1.17E-16 |
| Cgn      | -2.28036 | 6.88E-17 | 1.14E-16 |
| Vps4b    | -0.41364 | 6.56E-17 | 1.09E-16 |
| Inpp1    | -0.63166 | 6.44E-17 | 1.07E-16 |
| Gm4876   | -1.96456 | 6.44E-17 | 1.07E-16 |
| Lrrc4b   | -2.46532 | 6.14E-17 | 1.02E-16 |
| 2310040G | -3.31068 | 5.61E-17 | 9.31E-17 |
| Csf2rb   | -3.39313 | 5.51E-17 | 9.15E-17 |
| Ppp1r3d  | -3.51362 | 5.40E-17 | 8.97E-17 |
| Lipg     | -2.79272 | 5.32E-17 | 8.84E-17 |
| Cyp4f16  | -1.89159 | 5.09E-17 | 8.45E-17 |
| Sfn      | -3.16049 | 4.90E-17 | 8.14E-17 |
| Plpp5    | -0.75826 | 4.31E-17 | 7.17E-17 |
| Gm16499- | -3.08551 | 4.45E-17 | 7.39E-17 |
| BC051408 | -1.90331 | 4.37E-17 | 7.27E-17 |
| Acox1    | -0.39875 | 4.14E-17 | 6.89E-17 |
| Rasl10b  | -0.89472 | 3.67E-17 | 6.11E-17 |
| Nisch    | -0.28788 | 3.60E-17 | 5.99E-17 |
| Golph3   | -0.44369 | 3.53E-17 | 5.87E-17 |
| Atp5h    | -0.19912 | 3.50E-17 | 5.82E-17 |
| Evc2     | -2.84405 | 3.48E-17 | 5.79E-17 |
| Ptk7     | -2.6673  | 3.18E-17 | 5.30E-17 |
| Gsg1     | -2.61055 | 3.03E-17 | 5.05E-17 |
| Zwint    | -0.51413 | 2.84E-17 | 4.74E-17 |
| Asph     | -0.47054 | 2.80E-17 | 4.67E-17 |
| Fads2    | -0.88135 | 2.63E-17 | 4.39E-17 |
| Cbx6     | -0.41505 | 2.55E-17 | 4.26E-17 |
| Gm47586  | -1.21678 | 2.33E-17 | 3.89E-17 |
| Nek6     | -1.26591 | 2.14E-17 | 3.57E-17 |
| Gpr85    | -3.33882 | 2.18E-17 | 3.64E-17 |
| Tut7     | -0.32411 | 1.90E-17 | 3.18E-17 |
| Coro1a   | -3.02275 | 1.95E-17 | 3.27E-17 |
| Lcp2     | -4.216   | 1.87E-17 | 3.14E-17 |
| Gm20712  | -3.45307 | 1.87E-17 | 3.13E-17 |
| Bccip    | -0.47253 | 1.69E-17 | 2.83E-17 |
| Efhc2    | -3.29324 | 1.65E-17 | 2.78E-17 |
| Fibp     | -0.45252 | 1.56E-17 | 2.61E-17 |
| L1cam    | -2.51975 | 1.62E-17 | 2.72E-17 |
| Kctd6    | -0.73691 | 1.53E-17 | 2.57E-17 |

|          |          |          |          |
|----------|----------|----------|----------|
| Tpd52l2  | -0.43841 | 1.47E-17 | 2.48E-17 |
| Tbc1d10a | -0.8273  | 1.38E-17 | 2.32E-17 |
| Ahcyl2   | -0.57136 | 1.36E-17 | 2.29E-17 |
| Thnsl2   | -2.53142 | 1.41E-17 | 2.37E-17 |
| Pcdhb16  | -1.47127 | 1.23E-17 | 2.07E-17 |
| Pak2     | -0.26939 | 1.17E-17 | 1.98E-17 |
| Mpeg1    | -4.47184 | 1.24E-17 | 2.09E-17 |
| Slc4a10  | -1.47609 | 1.17E-17 | 1.97E-17 |
| Srsf9    | -0.34911 | 1.11E-17 | 1.87E-17 |
| Hkdc1    | -2.24424 | 1.15E-17 | 1.94E-17 |
| Surf4    | -0.44353 | 1.04E-17 | 1.76E-17 |
| Pi4k2b   | -1.85092 | 1.04E-17 | 1.75E-17 |
| Syt13    | -2.66654 | 1.01E-17 | 1.70E-17 |
| Gm9844   | -2.27843 | 9.51E-18 | 1.60E-17 |
| Plagl1   | -1.22172 | 8.88E-18 | 1.50E-17 |
| Pcnt     | -0.60547 | 8.20E-18 | 1.38E-17 |
| Pole3    | -0.66718 | 8.11E-18 | 1.37E-17 |
| Fam160b1 | -0.45235 | 7.98E-18 | 1.35E-17 |
| Gm38125  | -1.26273 | 7.63E-18 | 1.29E-17 |
| Ap3b1    | -0.53816 | 7.40E-18 | 1.25E-17 |
| Zfp593   | -1.27114 | 7.26E-18 | 1.23E-17 |
| Fbxl17   | -0.71307 | 7.07E-18 | 1.20E-17 |
| Psmb4    | -0.2774  | 6.92E-18 | 1.17E-17 |
| Pwwp3b   | -2.52439 | 7.25E-18 | 1.23E-17 |
| Dgcr2    | -0.55225 | 5.88E-18 | 9.96E-18 |
| Pim1     | -0.60108 | 5.82E-18 | 9.86E-18 |
| Efna5    | -2.54163 | 6.11E-18 | 1.03E-17 |
| Gm5069   | -2.49854 | 6.05E-18 | 1.02E-17 |
| Rcc2     | -0.75788 | 5.77E-18 | 9.77E-18 |
| Accs     | -2.41172 | 5.81E-18 | 9.84E-18 |
| Kdm6b    | -0.44398 | 5.32E-18 | 9.03E-18 |
| H2ac20   | -3.30986 | 5.04E-18 | 8.55E-18 |
| Bmp2     | -3.00652 | 4.99E-18 | 8.46E-18 |
| B3galt2  | -1.14034 | 4.67E-18 | 7.93E-18 |
| Sostdc1  | -3.72726 | 4.91E-18 | 8.32E-18 |
| Gm20696  | -1.50459 | 4.61E-18 | 7.82E-18 |
| Figl2    | -1.46582 | 4.57E-18 | 7.75E-18 |
| Mxi1     | -0.42112 | 3.99E-18 | 6.77E-18 |
| Cndp2    | -0.73593 | 3.91E-18 | 6.64E-18 |
| Frrs1    | -1.48906 | 3.95E-18 | 6.72E-18 |
| Kif5a    | -1.21584 | 3.88E-18 | 6.60E-18 |
| Fyb      | -5.50468 | 3.95E-18 | 6.71E-18 |
| Plcd4    | -2.10148 | 3.68E-18 | 6.25E-18 |
| Sidt2    | -0.64627 | 3.18E-18 | 5.42E-18 |
| Rpl37rt  | -0.91277 | 3.20E-18 | 5.44E-18 |
| Alg5     | -0.64723 | 3.17E-18 | 5.39E-18 |
| Nek9     | -0.48199 | 2.79E-18 | 4.76E-18 |

|          |          |          |          |
|----------|----------|----------|----------|
| Ndfip2   | -0.39005 | 2.67E-18 | 4.55E-18 |
| Degs1    | -0.51734 | 2.30E-18 | 3.92E-18 |
| Rbck1    | -0.5167  | 2.30E-18 | 3.92E-18 |
| Homer2   | -2.32508 | 2.37E-18 | 4.03E-18 |
| Rims1    | -1.72901 | 2.19E-18 | 3.73E-18 |
| Gm15530  | -1.67575 | 2.11E-18 | 3.61E-18 |
| Scn2b    | -3.4521  | 1.99E-18 | 3.40E-18 |
| Tppp     | -2.53234 | 1.90E-18 | 3.25E-18 |
| Ngfr     | -1.63055 | 1.86E-18 | 3.17E-18 |
| Tafa4    | -2.12995 | 1.74E-18 | 2.97E-18 |
| Mad2l2   | -0.99629 | 1.29E-18 | 2.21E-18 |
| Capn5    | -3.30081 | 1.33E-18 | 2.28E-18 |
| Cib2     | -1.53831 | 1.27E-18 | 2.17E-18 |
| Pld4     | -4.32254 | 1.31E-18 | 2.25E-18 |
| Myb      | -2.48632 | 1.28E-18 | 2.19E-18 |
| Slc35f1  | -2.41171 | 1.26E-18 | 2.15E-18 |
| Nsmf     | -0.86724 | 1.20E-18 | 2.06E-18 |
| Usp54    | -0.58162 | 1.15E-18 | 1.96E-18 |
| Rasd2    | -3.37734 | 1.21E-18 | 2.08E-18 |
| Atad2    | -1.00274 | 1.14E-18 | 1.95E-18 |
| Pkig     | -0.30496 | 1.12E-18 | 1.92E-18 |
| Keap1    | -0.49489 | 1.11E-18 | 1.91E-18 |
| S1pr2    | -3.58185 | 1.14E-18 | 1.95E-18 |
| Asb2     | -3.18121 | 1.10E-18 | 1.88E-18 |
| Sardh    | -2.58507 | 1.03E-18 | 1.77E-18 |
| Adamtsl4 | -2.27963 | 9.50E-19 | 1.63E-18 |
| Fzd7     | -2.93307 | 9.25E-19 | 1.59E-18 |
| Entpd2   | -2.9549  | 8.26E-19 | 1.42E-18 |
| Rassf10  | -2.81686 | 8.18E-19 | 1.41E-18 |
| Dagla    | -3.62204 | 8.08E-19 | 1.39E-18 |
| Bend6    | -1.99412 | 7.59E-19 | 1.31E-18 |
| Lgals3   | -2.02618 | 7.23E-19 | 1.24E-18 |
| Gli3     | -2.46021 | 6.98E-19 | 1.20E-18 |
| Camk2n2  | -1.15446 | 6.66E-19 | 1.15E-18 |
| Sap18    | -0.41923 | 6.32E-19 | 1.09E-18 |
| Lacc1    | -3.98993 | 6.25E-19 | 1.08E-18 |
| N4bp1    | -0.40724 | 5.59E-19 | 9.64E-19 |
| Gm49492  | -1.09481 | 5.63E-19 | 9.71E-19 |
| Ralgapa1 | -0.32616 | 4.91E-19 | 8.48E-19 |
| Zfp804b  | -2.49158 | 5.03E-19 | 8.69E-19 |
| Col9a3   | -1.91544 | 4.89E-19 | 8.44E-19 |
| Rnf215   | -0.55061 | 4.37E-19 | 7.56E-19 |
| Ttc9     | -2.2696  | 4.37E-19 | 7.56E-19 |
| Gm48885  | -3.01028 | 4.29E-19 | 7.42E-19 |
| Rab22a   | -0.49985 | 3.85E-19 | 6.67E-19 |
| Gm47863  | -2.85376 | 4.06E-19 | 7.02E-19 |
| St3gal5  | -0.81632 | 3.60E-19 | 6.23E-19 |

|          |          |          |          |
|----------|----------|----------|----------|
| Zeb2os   | -3.11051 | 3.61E-19 | 6.24E-19 |
| Rgs8     | -2.39603 | 3.53E-19 | 6.11E-19 |
| Slc25a32 | -0.6186  | 3.37E-19 | 5.83E-19 |
| Chml     | -1.39128 | 3.40E-19 | 5.89E-19 |
| Rapgef6  | -0.45202 | 3.30E-19 | 5.71E-19 |
| H2az1    | -0.24113 | 3.03E-19 | 5.26E-19 |
| 2700046A | -3.30151 | 3.08E-19 | 5.34E-19 |
| Nif3l1   | -2.05926 | 2.81E-19 | 4.87E-19 |
| Gm42443  | -3.34439 | 2.77E-19 | 4.81E-19 |
| Ccdc69   | -3.04366 | 2.84E-19 | 4.92E-19 |
| Gm9616   | -1.07695 | 2.61E-19 | 4.53E-19 |
| Phgdh    | -2.25529 | 2.64E-19 | 4.58E-19 |
| Dennd2a  | -1.13368 | 2.55E-19 | 4.43E-19 |
| Dhx58    | -3.41939 | 2.58E-19 | 4.47E-19 |
| Gm38340  | -3.29363 | 2.57E-19 | 4.47E-19 |
| Clrn1    | -2.8138  | 2.54E-19 | 4.41E-19 |
| Traf5    | -0.76518 | 2.09E-19 | 3.64E-19 |
| Pf4      | -4.36501 | 2.21E-19 | 3.84E-19 |
| Gm37333  | -1.51182 | 2.04E-19 | 3.54E-19 |
| Hbp1     | -0.47499 | 1.95E-19 | 3.40E-19 |
| Thsd7a   | -1.02672 | 2.00E-19 | 3.48E-19 |
| Tpbgl    | -3.20108 | 2.05E-19 | 3.57E-19 |
| F830115B | -2.41745 | 2.01E-19 | 3.51E-19 |
| Wsb1     | -0.50476 | 1.86E-19 | 3.25E-19 |
| Skap2    | -1.04662 | 1.73E-19 | 3.01E-19 |
| Zfp941   | -2.86577 | 1.72E-19 | 3.00E-19 |
| Neo1     | -0.57743 | 1.55E-19 | 2.71E-19 |
| Mat2b    | -0.41508 | 1.50E-19 | 2.63E-19 |
| Fign     | -2.57275 | 1.51E-19 | 2.63E-19 |
| 2610002N | -0.85515 | 1.41E-19 | 2.46E-19 |
| Magee1   | -0.94632 | 1.41E-19 | 2.47E-19 |
| Gm37694  | -4.39679 | 1.50E-19 | 2.62E-19 |
| Osbpl3   | -1.01467 | 1.33E-19 | 2.33E-19 |
| Rmdn2    | -1.78002 | 1.36E-19 | 2.38E-19 |
| Fam118a  | -0.72242 | 1.31E-19 | 2.29E-19 |
| Cpeb1    | -1.75532 | 1.21E-19 | 2.12E-19 |
| Pcdh7    | -2.58193 | 1.21E-19 | 2.11E-19 |
| Gm43187  | -3.96024 | 1.16E-19 | 2.03E-19 |
| Cacna1g  | -2.94275 | 1.16E-19 | 2.03E-19 |
| Rab20    | -3.52896 | 1.13E-19 | 1.97E-19 |
| Larp6    | -3.18408 | 1.12E-19 | 1.96E-19 |
| Mmut     | -0.68041 | 9.90E-20 | 1.74E-19 |
| Cdh6     | -3.57452 | 1.01E-19 | 1.77E-19 |
| Gtf3a    | -0.74101 | 9.22E-20 | 1.62E-19 |
| Bmpr1b   | -2.40296 | 9.26E-20 | 1.63E-19 |
| Aqp5     | -2.44573 | 8.84E-20 | 1.55E-19 |
| Tmem132l | -2.35717 | 8.58E-20 | 1.51E-19 |



|          |          |          |          |
|----------|----------|----------|----------|
| Abhd6    | -0.66132 | 7.67E-20 | 1.35E-19 |
| A330076H | -1.52593 | 7.75E-20 | 1.36E-19 |
| Snap23   | -0.62814 | 7.35E-20 | 1.29E-19 |
| Map1a    | -0.99197 | 7.10E-20 | 1.25E-19 |
| Bdh2     | -2.17979 | 7.22E-20 | 1.27E-19 |
| Arf3     | -0.47266 | 6.46E-20 | 1.14E-19 |
| Kcnk3    | -1.85055 | 6.53E-20 | 1.15E-19 |
| Itga9    | -2.1963  | 6.62E-20 | 1.17E-19 |
| Pml      | -0.93944 | 6.25E-20 | 1.10E-19 |
| Eif5a    | -0.29288 | 6.11E-20 | 1.08E-19 |
| Snhg11   | -1.41789 | 6.27E-20 | 1.11E-19 |
| Mrpl4    | -0.5182  | 5.64E-20 | 9.95E-20 |
| Gpr27    | -2.74748 | 5.77E-20 | 1.02E-19 |
| Kbtbd2   | -0.53345 | 5.33E-20 | 9.41E-20 |
| Ifngr2   | -0.84062 | 5.28E-20 | 9.32E-20 |
| Epha3    | -3.11293 | 5.48E-20 | 9.66E-20 |
| Oas1b    | -4.11039 | 5.41E-20 | 9.55E-20 |
| Wsb2     | -0.5372  | 4.96E-20 | 8.77E-20 |
| Dglucy   | -3.57383 | 4.85E-20 | 8.56E-20 |
| Taf13    | -0.59589 | 4.32E-20 | 7.64E-20 |
| Gpr155   | -1.05294 | 3.88E-20 | 6.86E-20 |
| Susd2    | -3.05865 | 3.85E-20 | 6.81E-20 |
| Setd3    | -0.44608 | 3.54E-20 | 6.26E-20 |
| Mir1931  | -3.35016 | 3.76E-20 | 6.64E-20 |
| Sulf2    | -2.52491 | 3.64E-20 | 6.44E-20 |
| Rian     | -1.97941 | 3.46E-20 | 6.12E-20 |
| Septin6  | -1.97529 | 3.43E-20 | 6.08E-20 |
| Mcee     | -0.53864 | 3.34E-20 | 5.91E-20 |
| Metrn1   | -3.71064 | 3.54E-20 | 6.26E-20 |
| Gm49542  | -3.68283 | 3.53E-20 | 6.25E-20 |
| Cnksr2   | -1.61641 | 3.27E-20 | 5.80E-20 |
| Slc22a5  | -1.95177 | 3.17E-20 | 5.62E-20 |
| Dcun1d3  | -0.53187 | 2.68E-20 | 4.74E-20 |
| Clybl    | -1.24831 | 2.74E-20 | 4.85E-20 |
| Arsk     | -1.03931 | 2.46E-20 | 4.36E-20 |
| Nod2     | -3.20987 | 2.57E-20 | 4.55E-20 |
| Bak1     | -0.95958 | 2.32E-20 | 4.11E-20 |
| Prrg3    | -3.37464 | 2.36E-20 | 4.19E-20 |
| Cdk9     | -0.48304 | 2.09E-20 | 3.71E-20 |
| Gpx3     | -1.50593 | 2.07E-20 | 3.68E-20 |
| Slco5a1  | -3.09906 | 1.94E-20 | 3.44E-20 |
| Bmerb1   | -2.43237 | 1.88E-20 | 3.34E-20 |
| Fcgr3    | -4.46904 | 1.86E-20 | 3.31E-20 |
| Acap3    | -1.17616 | 1.62E-20 | 2.89E-20 |
| Maml3    | -0.84332 | 1.48E-20 | 2.64E-20 |
| Mier1    | -0.29055 | 1.28E-20 | 2.28E-20 |
| C630043F | -1.49307 | 1.33E-20 | 2.37E-20 |

|            |          |          |          |
|------------|----------|----------|----------|
| Dcbld2     | -0.76465 | 1.23E-20 | 2.19E-20 |
| Slc41a3    | -2.80696 | 1.25E-20 | 2.23E-20 |
| Gm38157    | -3.00833 | 1.23E-20 | 2.20E-20 |
| Aldh4a1    | -0.81806 | 1.15E-20 | 2.05E-20 |
| Pds5b      | -0.45682 | 1.12E-20 | 2.00E-20 |
| Stx2       | -0.94469 | 1.13E-20 | 2.03E-20 |
| Frem2      | -3.60092 | 1.07E-20 | 1.91E-20 |
| Tspyl5     | -2.88537 | 9.75E-21 | 1.74E-20 |
| Nat8l      | -2.25038 | 9.30E-21 | 1.66E-20 |
| Gm10134    | -4.13277 | 9.48E-21 | 1.70E-20 |
| Ube2r2     | -0.36805 | 8.24E-21 | 1.48E-20 |
| Mef2a      | -0.30382 | 7.97E-21 | 1.43E-20 |
| Bbc3       | -1.42891 | 8.00E-21 | 1.43E-20 |
| Ret        | -3.08822 | 8.27E-21 | 1.48E-20 |
| Ifngr1     | -0.4665  | 7.38E-21 | 1.32E-20 |
| Spon2      | -2.94692 | 7.77E-21 | 1.39E-20 |
| Slc10a3    | -1.67699 | 6.72E-21 | 1.21E-20 |
| Rap1gap    | -1.73336 | 6.81E-21 | 1.22E-20 |
| Mctp1      | -5.64496 | 7.05E-21 | 1.27E-20 |
| Fstl5      | -2.23542 | 6.50E-21 | 1.17E-20 |
| Gprasp2    | -1.35185 | 6.25E-21 | 1.12E-20 |
| Mlec       | -0.6552  | 6.03E-21 | 1.08E-20 |
| Vamp4      | -0.51831 | 5.88E-21 | 1.06E-20 |
| Zfp976     | -2.81567 | 6.27E-21 | 1.13E-20 |
| Gm5148     | -2.38053 | 6.17E-21 | 1.11E-20 |
| Fam174b    | -2.75727 | 5.72E-21 | 1.03E-20 |
| Ilrun      | -0.48243 | 4.99E-21 | 9.00E-21 |
| Igf1       | -2.48866 | 5.02E-21 | 9.04E-21 |
| Prox1os    | -2.05631 | 4.86E-21 | 8.75E-21 |
| Abcd3      | -0.61494 | 4.09E-21 | 7.38E-21 |
| Nrxn2      | -1.40615 | 4.09E-21 | 7.38E-21 |
| Cib1       | -0.75888 | 3.69E-21 | 6.66E-21 |
| Fam102b    | -1.17288 | 3.63E-21 | 6.57E-21 |
| Gm20721    | -2.64891 | 3.65E-21 | 6.59E-21 |
| St6galnac2 | -0.43588 | 3.19E-21 | 5.77E-21 |
| Loxl3      | -3.04965 | 3.22E-21 | 5.82E-21 |
| Gm26881    | -1.66803 | 2.65E-21 | 4.80E-21 |
| Shtn1      | -2.63464 | 2.65E-21 | 4.79E-21 |
| Tmed2      | -0.35851 | 2.19E-21 | 3.97E-21 |
| Raver2     | -1.43306 | 2.13E-21 | 3.85E-21 |
| Gm38071    | -4.26538 | 2.19E-21 | 3.97E-21 |
| Phlpp1     | -0.55113 | 2.00E-21 | 3.62E-21 |
| Plekhd1    | -2.36426 | 1.97E-21 | 3.57E-21 |
| Sat2       | -2.48188 | 1.87E-21 | 3.39E-21 |
| Bcl10      | -0.54097 | 1.52E-21 | 2.75E-21 |
| Ntpcr      | -1.28759 | 1.57E-21 | 2.85E-21 |
| Rilp       | -2.69642 | 1.59E-21 | 2.89E-21 |

|           |          |          |          |
|-----------|----------|----------|----------|
| E130311K: | -1.92564 | 1.55E-21 | 2.81E-21 |
| Gk5       | -1.44286 | 1.54E-21 | 2.79E-21 |
| Trim68    | -2.88864 | 1.47E-21 | 2.67E-21 |
| Gcnt4     | -3.03527 | 1.49E-21 | 2.71E-21 |
| 1700017B: | -1.59371 | 1.37E-21 | 2.50E-21 |
| Snrpe     | -0.32693 | 1.18E-21 | 2.15E-21 |
| Fam91a1   | -0.70583 | 1.16E-21 | 2.12E-21 |
| Smurf1    | -0.79914 | 1.11E-21 | 2.02E-21 |
| Adamtsl2  | -3.22474 | 1.14E-21 | 2.08E-21 |
| Adra2c    | -3.73327 | 1.13E-21 | 2.06E-21 |
| Cdkn1b    | -0.38006 | 1.01E-21 | 1.84E-21 |
| Fam184b   | -2.02514 | 1.06E-21 | 1.93E-21 |
| Gm11266   | -2.35381 | 1.04E-21 | 1.90E-21 |
| Gng3      | -1.19448 | 9.89E-22 | 1.80E-21 |
| Enpp1     | -3.72772 | 1.03E-21 | 1.88E-21 |
| Fam210b   | -0.864   | 8.84E-22 | 1.61E-21 |
| Acot11    | -1.72598 | 8.78E-22 | 1.60E-21 |
| Atp7a     | -0.7131  | 8.32E-22 | 1.52E-21 |
| B230219D  | -0.29787 | 8.05E-22 | 1.47E-21 |
| Car11     | -2.14497 | 8.20E-22 | 1.50E-21 |
| Fam81a    | -3.65978 | 8.10E-22 | 1.48E-21 |
| Lrp3      | -2.4165  | 8.00E-22 | 1.46E-21 |
| Wipf3     | -3.83166 | 7.85E-22 | 1.43E-21 |
| Nexmif    | -2.15177 | 7.54E-22 | 1.38E-21 |
| C030013C: | -4.62747 | 7.88E-22 | 1.44E-21 |
| Nrsn1     | -1.22138 | 7.07E-22 | 1.29E-21 |
| Ripply3   | -1.92887 | 6.22E-22 | 1.14E-21 |
| P3h1      | -1.86876 | 6.24E-22 | 1.14E-21 |
| Itga3     | -1.81033 | 6.09E-22 | 1.12E-21 |
| Neurl1b   | -3.24528 | 6.02E-22 | 1.10E-21 |
| Lcn2      | -1.3911  | 5.93E-22 | 1.09E-21 |
| Apoc1     | -1.8876  | 5.57E-22 | 1.02E-21 |
| Dzip1     | -1.94937 | 4.64E-22 | 8.51E-22 |
| Jak2      | -0.5797  | 4.40E-22 | 8.08E-22 |
| Bcl9l     | -0.60289 | 3.92E-22 | 7.20E-22 |
| Eif3l     | -0.56839 | 3.82E-22 | 7.02E-22 |
| Tnfrsf22  | -3.98611 | 4.09E-22 | 7.51E-22 |
| Ptgs2     | -3.87003 | 4.01E-22 | 7.36E-22 |
| Abhd16a   | -0.58529 | 3.36E-22 | 6.18E-22 |
| Gipc1     | -0.71212 | 3.31E-22 | 6.09E-22 |
| Gda       | -3.50724 | 3.55E-22 | 6.53E-22 |
| Acsl3     | -0.40406 | 3.35E-22 | 6.17E-22 |
| Sh3glb2   | -0.61053 | 3.18E-22 | 5.86E-22 |
| Gm20257   | -3.38966 | 2.97E-22 | 5.47E-22 |
| Gm49329   | -3.01996 | 2.92E-22 | 5.39E-22 |
| Zfp141    | -2.86887 | 2.79E-22 | 5.14E-22 |
| Dapk2     | -4.22272 | 2.34E-22 | 4.32E-22 |

|          |          |          |          |
|----------|----------|----------|----------|
| Gm47644  | -2.07671 | 2.25E-22 | 4.16E-22 |
| Fzd2     | -4.01775 | 2.31E-22 | 4.26E-22 |
| Cep68    | -0.8075  | 1.99E-22 | 3.68E-22 |
| Abhd5    | -0.76016 | 1.88E-22 | 3.47E-22 |
| Selplg   | -5.32461 | 2.00E-22 | 3.69E-22 |
| Galnt2   | -0.70227 | 1.71E-22 | 3.15E-22 |
| Ppp1r3c  | -1.66049 | 1.64E-22 | 3.04E-22 |
| Mink1    | -0.57472 | 1.52E-22 | 2.81E-22 |
| Sh3glb1  | -0.25596 | 1.46E-22 | 2.70E-22 |
| Dtx1     | -2.41952 | 1.56E-22 | 2.88E-22 |
| Cx3cr1   | -4.34516 | 1.56E-22 | 2.88E-22 |
| Msl3     | -0.81268 | 1.35E-22 | 2.50E-22 |
| Pnkd     | -0.38338 | 1.32E-22 | 2.45E-22 |
| Fam234a  | -1.01507 | 1.35E-22 | 2.51E-22 |
| Inhba    | -2.21437 | 1.31E-22 | 2.43E-22 |
| Sumf1    | -1.17576 | 1.24E-22 | 2.30E-22 |
| Gm36963  | -3.81918 | 1.32E-22 | 2.45E-22 |
| Adcy3    | -2.14785 | 1.24E-22 | 2.30E-22 |
| Rgl2     | -0.71236 | 1.16E-22 | 2.16E-22 |
| Zdhhc20  | -0.50481 | 1.09E-22 | 2.02E-22 |
| Nbeal1   | -0.32106 | 9.86E-23 | 1.83E-22 |
| Lurap1   | -1.25917 | 1.02E-22 | 1.90E-22 |
| Zc3h7b   | -0.52602 | 9.37E-23 | 1.74E-22 |
| Eif3c    | -0.30406 | 8.70E-23 | 1.62E-22 |
| Cit      | -1.06087 | 8.77E-23 | 1.63E-22 |
| Serf2    | -0.26833 | 8.53E-23 | 1.59E-22 |
| Sh3bp1   | -4.62586 | 9.44E-23 | 1.75E-22 |
| Gm15663  | -3.33175 | 8.10E-23 | 1.51E-22 |
| H1f10    | -2.9616  | 7.43E-23 | 1.38E-22 |
| C530043K | -1.02741 | 6.96E-23 | 1.30E-22 |
| Nqo1     | -2.80612 | 7.44E-23 | 1.39E-22 |
| 1810010H | -1.23664 | 6.88E-23 | 1.28E-22 |
| Megf10   | -1.69005 | 6.96E-23 | 1.30E-22 |
| Ace      | -3.89292 | 7.17E-23 | 1.33E-22 |
| Hecw1    | -2.76542 | 6.66E-23 | 1.24E-22 |
| Bcar1    | -0.66889 | 5.86E-23 | 1.09E-22 |
| Plpp6    | -0.62304 | 5.54E-23 | 1.03E-22 |
| Gm9843   | -0.92057 | 5.27E-23 | 9.83E-23 |
| Cetn3    | -0.37577 | 4.65E-23 | 8.69E-23 |
| Slc9a2   | -4.72658 | 5.21E-23 | 9.73E-23 |
| Olfml3   | -3.98444 | 5.07E-23 | 9.48E-23 |
| Zfp710   | -1.96556 | 4.75E-23 | 8.87E-23 |
| Lman2    | -0.49739 | 4.41E-23 | 8.25E-23 |
| Nudt9    | -0.65543 | 3.79E-23 | 7.09E-23 |
| Rp9      | -0.40025 | 3.58E-23 | 6.71E-23 |
| Atpif1   | -0.32173 | 3.51E-23 | 6.58E-23 |
| Gm42991  | -3.4107  | 3.77E-23 | 7.06E-23 |

|           |          |          |          |
|-----------|----------|----------|----------|
| Spp1      | -4.73964 | 3.81E-23 | 7.13E-23 |
| Crybb3    | -2.3076  | 3.62E-23 | 6.77E-23 |
| Adarb1    | -0.83257 | 3.32E-23 | 6.23E-23 |
| Armccx2   | -0.88663 | 3.32E-23 | 6.23E-23 |
| M6pr      | -0.48487 | 3.24E-23 | 6.07E-23 |
| Gm26660   | -3.41123 | 3.58E-23 | 6.70E-23 |
| Elf4      | -4.91838 | 3.33E-23 | 6.24E-23 |
| Kctd14    | -2.44993 | 3.07E-23 | 5.77E-23 |
| Atp6ap1   | -0.42854 | 2.69E-23 | 5.06E-23 |
| Cacna2d3  | -1.88325 | 2.80E-23 | 5.26E-23 |
| Gm29488   | -1.94007 | 2.77E-23 | 5.19E-23 |
| Slc46a3   | -0.8159  | 2.45E-23 | 4.61E-23 |
| Ikzf4     | -1.97445 | 2.55E-23 | 4.78E-23 |
| mt-Tc     | -1.90919 | 2.40E-23 | 4.50E-23 |
| Stx17     | -0.79937 | 2.17E-23 | 4.08E-23 |
| Cerox1    | -2.39089 | 2.32E-23 | 4.35E-23 |
| Acp5      | -4.45109 | 2.32E-23 | 4.37E-23 |
| Loxl2     | -2.35839 | 2.20E-23 | 4.15E-23 |
| Tead1     | -0.5499  | 2.00E-23 | 3.77E-23 |
| P2ry1     | -4.77738 | 2.24E-23 | 4.22E-23 |
| Trim6     | -4.76784 | 2.23E-23 | 4.20E-23 |
| Pafah1b1  | -0.28379 | 1.93E-23 | 3.63E-23 |
| Map3k3    | -0.64391 | 1.92E-23 | 3.62E-23 |
| Dock11    | -3.30414 | 1.97E-23 | 3.72E-23 |
| Vstm2b    | -2.53571 | 1.99E-23 | 3.75E-23 |
| Grm5      | -2.63965 | 1.91E-23 | 3.60E-23 |
| Creg2     | -2.03016 | 1.74E-23 | 3.29E-23 |
| Gm49708   | -1.64193 | 1.56E-23 | 2.94E-23 |
| Zfp72     | -3.96957 | 1.65E-23 | 3.11E-23 |
| Arhgap27c | -3.33096 | 1.55E-23 | 2.92E-23 |
| Grm6      | -1.94382 | 1.49E-23 | 2.82E-23 |
| Frmd3     | -2.00211 | 1.43E-23 | 2.69E-23 |
| Kif23     | -2.06098 | 1.44E-23 | 2.72E-23 |
| Fbln5     | -3.56984 | 1.50E-23 | 2.84E-23 |
| Npnt      | -3.51116 | 1.49E-23 | 2.81E-23 |
| Scrn1     | -1.18525 | 1.37E-23 | 2.59E-23 |
| Glr3      | -0.48258 | 1.17E-23 | 2.21E-23 |
| B3galt1   | -1.79074 | 1.24E-23 | 2.35E-23 |
| Ust       | -2.2784  | 1.23E-23 | 2.32E-23 |
| Pqlc3     | -3.77639 | 1.24E-23 | 2.34E-23 |
| Arl5c     | -2.96943 | 1.19E-23 | 2.26E-23 |
| Traf1     | -4.79651 | 1.19E-23 | 2.25E-23 |
| Nthl1     | -1.29895 | 1.07E-23 | 2.03E-23 |
| C230071H  | -4.78438 | 1.14E-23 | 2.16E-23 |
| Cobl      | -1.71341 | 1.02E-23 | 1.93E-23 |
| Gm15500   | -1.05841 | 9.96E-24 | 1.89E-23 |
| Os9       | -0.52827 | 8.85E-24 | 1.68E-23 |

|           |          |          |          |
|-----------|----------|----------|----------|
| Lair1     | -2.56726 | 9.70E-24 | 1.84E-23 |
| Syt10     | -3.32523 | 9.32E-24 | 1.77E-23 |
| Ppp2r2d   | -0.43811 | 7.94E-24 | 1.51E-23 |
| Scgn      | -2.49808 | 8.02E-24 | 1.52E-23 |
| Cdk4      | -0.60337 | 7.04E-24 | 1.34E-23 |
| Igsf8     | -0.8615  | 7.00E-24 | 1.33E-23 |
| Rab10     | -0.37914 | 6.66E-24 | 1.27E-23 |
| Gm7694    | -3.18047 | 7.31E-24 | 1.39E-23 |
| Supt4a    | -0.44638 | 6.13E-24 | 1.17E-23 |
| Pop5      | -0.39385 | 6.09E-24 | 1.16E-23 |
| Atic      | -1.23829 | 6.09E-24 | 1.16E-23 |
| Kcnmb4    | -1.55864 | 5.86E-24 | 1.12E-23 |
| Ablim3    | -3.25712 | 5.61E-24 | 1.07E-23 |
| B430319G  | -3.00486 | 5.58E-24 | 1.06E-23 |
| Lrrc41    | -0.82233 | 4.72E-24 | 9.01E-24 |
| Tram1l1   | -2.527   | 4.67E-24 | 8.91E-24 |
| Dcdc2a    | -1.74946 | 4.49E-24 | 8.58E-24 |
| Rgs11     | -1.78886 | 4.35E-24 | 8.30E-24 |
| Osbpl10   | -3.95167 | 4.50E-24 | 8.59E-24 |
| Faim2     | -2.09752 | 4.22E-24 | 8.06E-24 |
| Il17ra    | -1.5497  | 4.08E-24 | 7.80E-24 |
| Mapk8ip1  | -1.11978 | 3.89E-24 | 7.43E-24 |
| Cpt1c     | -2.21847 | 3.80E-24 | 7.27E-24 |
| Slc14a1   | -2.13762 | 3.72E-24 | 7.11E-24 |
| Vdac3     | -0.38227 | 3.41E-24 | 6.53E-24 |
| Cd52      | -2.71533 | 3.81E-24 | 7.28E-24 |
| Glipr2    | -3.845   | 3.62E-24 | 6.92E-24 |
| Gnao1     | -0.67728 | 3.29E-24 | 6.31E-24 |
| Stat5a    | -4.20786 | 3.61E-24 | 6.91E-24 |
| Gm14303   | -0.81168 | 3.20E-24 | 6.13E-24 |
| Zdhhc1    | -1.10147 | 3.13E-24 | 6.00E-24 |
| Nrros     | -1.87272 | 3.02E-24 | 5.79E-24 |
| Caskin1   | -1.4896  | 2.93E-24 | 5.62E-24 |
| Gm10399   | -4.03472 | 3.11E-24 | 5.96E-24 |
| Vasn      | -0.88485 | 2.65E-24 | 5.09E-24 |
| Ly96      | -3.63828 | 2.90E-24 | 5.56E-24 |
| Pcdhb14   | -1.56323 | 2.60E-24 | 4.99E-24 |
| Dok1      | -3.94367 | 2.66E-24 | 5.10E-24 |
| Xkr8      | -2.75834 | 2.51E-24 | 4.81E-24 |
| Mycn      | -2.85459 | 2.42E-24 | 4.64E-24 |
| Fdx1      | -0.61295 | 2.05E-24 | 3.93E-24 |
| Hexa      | -0.76927 | 2.01E-24 | 3.87E-24 |
| E230020A1 | -2.90654 | 2.13E-24 | 4.09E-24 |
| Aox1      | -3.8381  | 2.10E-24 | 4.03E-24 |
| Topbp1    | -1.00194 | 1.91E-24 | 3.68E-24 |
| Alad      | -0.76415 | 1.87E-24 | 3.60E-24 |
| Bhlhb9    | -0.9761  | 1.83E-24 | 3.52E-24 |

|           |          |          |          |
|-----------|----------|----------|----------|
| Ccnjl     | -1.91859 | 1.88E-24 | 3.62E-24 |
| Abcg3     | -4.70622 | 1.69E-24 | 3.25E-24 |
| Vwa3a     | -4.5349  | 1.66E-24 | 3.20E-24 |
| Pycard    | -2.00135 | 1.50E-24 | 2.89E-24 |
| Eva1c     | -1.99766 | 1.50E-24 | 2.90E-24 |
| Rdm1      | -0.60722 | 1.31E-24 | 2.53E-24 |
| Apip      | -0.72846 | 1.20E-24 | 2.32E-24 |
| Dpp4      | -3.53181 | 1.19E-24 | 2.29E-24 |
| Clcc1     | -0.70776 | 1.02E-24 | 1.96E-24 |
| Gria4     | -2.26536 | 1.07E-24 | 2.06E-24 |
| Cyp39a1   | -2.24679 | 1.04E-24 | 2.01E-24 |
| Npy1r     | -3.63829 | 8.93E-25 | 1.73E-24 |
| Mov10     | -2.36692 | 8.22E-25 | 1.59E-24 |
| 1700019D  | -1.81956 | 8.10E-25 | 1.57E-24 |
| Morc4     | -4.23694 | 8.57E-25 | 1.66E-24 |
| Idua      | -3.23433 | 7.99E-25 | 1.55E-24 |
| Creb5     | -2.28928 | 7.96E-25 | 1.54E-24 |
| Cd74      | -3.07251 | 7.97E-25 | 1.54E-24 |
| Tmem164   | -1.70074 | 7.14E-25 | 1.38E-24 |
| Exoc6b    | -0.60409 | 6.54E-25 | 1.27E-24 |
| Bmp1      | -2.01871 | 6.58E-25 | 1.28E-24 |
| Arhgef7   | -0.64193 | 5.90E-25 | 1.15E-24 |
| Hey2      | -0.88919 | 5.96E-25 | 1.16E-24 |
| Rab11fip1 | -0.93929 | 5.66E-25 | 1.10E-24 |
| 4833412C  | -6.2576  | 6.43E-25 | 1.25E-24 |
| Adora2b   | -4.70004 | 6.37E-25 | 1.24E-24 |
| Tbc1d12   | -0.65481 | 5.12E-25 | 9.94E-25 |
| Glrb      | -1.69812 | 5.39E-25 | 1.05E-24 |
| Angpt1    | -3.60848 | 5.61E-25 | 1.09E-24 |
| Evc       | -3.61351 | 5.43E-25 | 1.05E-24 |
| Tafa5     | -1.26634 | 4.34E-25 | 8.43E-25 |
| Nefl      | -1.01891 | 4.27E-25 | 8.31E-25 |
| Polg      | -0.71259 | 3.87E-25 | 7.52E-25 |
| Swi5      | -0.33019 | 3.64E-25 | 7.08E-25 |
| 9530018F  | -4.89891 | 3.93E-25 | 7.64E-25 |
| Fez1      | -1.43313 | 3.52E-25 | 6.86E-25 |
| B230216N  | -5.23169 | 3.75E-25 | 7.29E-25 |
| Lpar1     | -3.78987 | 3.32E-25 | 6.46E-25 |
| Rab11fip4 | -1.48712 | 3.06E-25 | 5.96E-25 |
| Tnk2      | -0.68367 | 2.70E-25 | 5.27E-25 |
| Adh5      | -0.47828 | 2.53E-25 | 4.94E-25 |
| Abi3bp    | -2.59874 | 2.83E-25 | 5.51E-25 |
| Emid1     | -3.36973 | 2.82E-25 | 5.50E-25 |
| C1galt1   | -0.84843 | 2.50E-25 | 4.87E-25 |
| Serpina3g | -5.31504 | 2.84E-25 | 5.54E-25 |
| Ppm1l     | -0.96964 | 2.41E-25 | 4.71E-25 |
| Cdkn2d    | -0.64605 | 2.34E-25 | 4.56E-25 |

|           |          |          |          |
|-----------|----------|----------|----------|
| Cox6b2    | -0.88062 | 2.25E-25 | 4.40E-25 |
| Nyap2     | -2.56537 | 2.30E-25 | 4.49E-25 |
| Nt5c3b    | -1.04525 | 2.14E-25 | 4.18E-25 |
| Rab21     | -0.44465 | 2.03E-25 | 3.97E-25 |
| Pld3      | -0.85293 | 2.02E-25 | 3.95E-25 |
| Slc15a2   | -0.91612 | 1.86E-25 | 3.64E-25 |
| Sec61a1   | -0.54164 | 1.74E-25 | 3.41E-25 |
| Crif2     | -0.83631 | 1.46E-25 | 2.86E-25 |
| Ccdc68    | -4.3369  | 1.55E-25 | 3.03E-25 |
| Elf2      | -0.45314 | 1.16E-25 | 2.28E-25 |
| Stx1b     | -2.13514 | 1.22E-25 | 2.39E-25 |
| Cox6b1    | -0.27002 | 1.00E-25 | 1.97E-25 |
| Aif1      | -5.74288 | 1.03E-25 | 2.02E-25 |
| Kcna2     | -2.11202 | 8.92E-26 | 1.75E-25 |
| Mb21d2    | -2.19403 | 8.32E-26 | 1.64E-25 |
| Nomo1     | -0.5916  | 6.97E-26 | 1.37E-25 |
| Col5a3    | -2.12567 | 7.35E-26 | 1.45E-25 |
| 2610011E  | -4.54205 | 7.67E-26 | 1.51E-25 |
| Cgas      | -5.25717 | 7.32E-26 | 1.44E-25 |
| Gramd3    | -2.81213 | 6.74E-26 | 1.33E-25 |
| Zc2hc1a   | -0.70941 | 5.95E-26 | 1.17E-25 |
| Cmtm5     | -2.62853 | 6.00E-26 | 1.18E-25 |
| Inafm1    | -0.6924  | 5.16E-26 | 1.02E-25 |
| Irf8      | -3.17192 | 5.22E-26 | 1.03E-25 |
| Flywch2   | -1.47648 | 4.84E-26 | 9.55E-26 |
| Dapp1     | -2.54008 | 4.75E-26 | 9.37E-26 |
| Bscl2     | -0.80306 | 4.25E-26 | 8.40E-26 |
| Grm3      | -4.67072 | 4.53E-26 | 8.94E-26 |
| Dipk1c    | -2.46288 | 4.04E-26 | 7.98E-26 |
| Tbc1d22a  | -1.28707 | 3.79E-26 | 7.49E-26 |
| Itgb4     | -3.30339 | 3.82E-26 | 7.54E-26 |
| Vti1b     | -0.5083  | 3.28E-26 | 6.48E-26 |
| Hint2     | -0.54318 | 3.26E-26 | 6.45E-26 |
| Abcc6     | -5.01965 | 3.25E-26 | 6.43E-26 |
| Mamdc2    | -4.28427 | 3.10E-26 | 6.14E-26 |
| Snai1     | -4.20191 | 3.01E-26 | 5.95E-26 |
| Mtmr10    | -0.90784 | 2.42E-26 | 4.80E-26 |
| Bche      | -3.95398 | 2.73E-26 | 5.41E-26 |
| Serpina3n | -3.91361 | 2.71E-26 | 5.38E-26 |
| Unc5c     | -1.89399 | 2.45E-26 | 4.86E-26 |
| Cxcl14    | -2.32985 | 2.42E-26 | 4.79E-26 |
| Khk       | -0.92039 | 2.13E-26 | 4.23E-26 |
| Dipk1b    | -2.4445  | 2.26E-26 | 4.48E-26 |
| Gm42731   | -1.9815  | 2.17E-26 | 4.31E-26 |
| Nelfe     | -0.91574 | 2.06E-26 | 4.09E-26 |
| Mrpl33    | -0.44529 | 1.87E-26 | 3.71E-26 |
| Nos2      | -4.31942 | 1.90E-26 | 3.78E-26 |



|           |          |          |          |
|-----------|----------|----------|----------|
| Tbc1d2b   | -1.45915 | 1.73E-26 | 3.44E-26 |
| Bsdc1     | -0.68884 | 1.63E-26 | 3.24E-26 |
| Kdelr2    | -0.58613 | 1.46E-26 | 2.90E-26 |
| Popdc3    | -2.51912 | 1.61E-26 | 3.20E-26 |
| Gm17229   | -4.28368 | 1.39E-26 | 2.77E-26 |
| Rpsa-ps10 | -0.32961 | 9.79E-27 | 1.95E-26 |
| Slc35f5   | -0.96542 | 1.00E-26 | 2.00E-26 |
| Gm12250   | -4.42998 | 1.04E-26 | 2.08E-26 |
| Efcab14   | -0.5188  | 8.79E-27 | 1.75E-26 |
| Vstm2a    | -2.1982  | 9.29E-27 | 1.85E-26 |
| Tnfrsf9   | -4.27877 | 9.36E-27 | 1.87E-26 |
| Ppp2r1a   | -0.47927 | 7.69E-27 | 1.54E-26 |
| Pdzrn3    | -2.95293 | 8.63E-27 | 1.72E-26 |
| Ephx3     | -4.93529 | 8.74E-27 | 1.74E-26 |
| Trem2     | -4.56084 | 7.91E-27 | 1.58E-26 |
| Cyp27a1   | -2.79029 | 7.20E-27 | 1.44E-26 |
| Bves      | -2.08907 | 7.02E-27 | 1.40E-26 |
| Mpp1      | -0.89605 | 5.73E-27 | 1.15E-26 |
| Pced1b    | -3.97896 | 6.39E-27 | 1.28E-26 |
| 9130230N  | -6.11693 | 6.37E-27 | 1.28E-26 |
| Cntn4     | -2.53616 | 5.10E-27 | 1.02E-26 |
| Gm49767   | -3.50615 | 5.06E-27 | 1.02E-26 |
| Tnxb      | -3.72739 | 5.15E-27 | 1.03E-26 |
| Cd59a     | -0.37361 | 4.36E-27 | 8.76E-27 |
| Rapgef1   | -0.62209 | 4.37E-27 | 8.78E-27 |
| C1ra      | -4.53914 | 4.98E-27 | 9.99E-27 |
| Shank1    | -1.62577 | 4.32E-27 | 8.67E-27 |
| Scd2      | -0.48104 | 3.90E-27 | 7.85E-27 |
| Gm44095   | -4.7605  | 4.36E-27 | 8.76E-27 |
| Cadm4     | -2.34106 | 4.05E-27 | 8.15E-27 |
| Frem1     | -2.80089 | 4.18E-27 | 8.40E-27 |
| Gng7      | -1.70966 | 3.86E-27 | 7.77E-27 |
| Mocos     | -4.41791 | 4.14E-27 | 8.33E-27 |
| Ctnnd2    | -1.84531 | 3.00E-27 | 6.05E-27 |
| Sord      | -2.31743 | 2.94E-27 | 5.92E-27 |
| Ptgds     | -1.5561  | 2.88E-27 | 5.81E-27 |
| Myom1     | -2.12585 | 2.78E-27 | 5.60E-27 |
| Pnpla8    | -0.4775  | 2.37E-27 | 4.78E-27 |
| Dse       | -4.02576 | 2.58E-27 | 5.21E-27 |
| Mylpf     | -1.27116 | 2.23E-27 | 4.50E-27 |
| Lama3     | -4.45245 | 2.39E-27 | 4.82E-27 |
| Tmem191   | -1.36645 | 1.89E-27 | 3.81E-27 |
| Pdcd5     | -0.43057 | 1.74E-27 | 3.52E-27 |
| Slc4a3    | -2.11777 | 1.80E-27 | 3.63E-27 |
| Atp2b2    | -1.90767 | 1.71E-27 | 3.45E-27 |
| Cryzl2    | -2.49    | 1.77E-27 | 3.59E-27 |
| Gmn       | -1.32608 | 1.58E-27 | 3.19E-27 |

|           |          |          |          |
|-----------|----------|----------|----------|
| Gsap      | -2.28154 | 1.68E-27 | 3.40E-27 |
| Sil1      | -0.91158 | 1.52E-27 | 3.08E-27 |
| Rps10-ps1 | -1.04896 | 1.50E-27 | 3.05E-27 |
| Kazn      | -1.75606 | 1.32E-27 | 2.68E-27 |
| Mical2    | -4.17394 | 1.41E-27 | 2.85E-27 |
| Cuta      | -0.44304 | 1.05E-27 | 2.14E-27 |
| Nfkbiz    | -0.91209 | 1.08E-27 | 2.19E-27 |
| Mtmr2     | -0.82584 | 1.06E-27 | 2.16E-27 |
| Dlgap1    | -1.76896 | 1.10E-27 | 2.24E-27 |
| Agt       | -3.55529 | 1.09E-27 | 2.22E-27 |
| Ly86      | -5.41702 | 1.08E-27 | 2.19E-27 |
| Nrip2     | -2.83449 | 9.15E-28 | 1.86E-27 |
| Tnfrsf25  | -3.61344 | 9.14E-28 | 1.86E-27 |
| Nipsnap3b | -0.94594 | 7.65E-28 | 1.56E-27 |
| Eef1a2    | -1.75075 | 7.93E-28 | 1.61E-27 |
| Ncaph     | -4.5788  | 8.71E-28 | 1.77E-27 |
| C130073E1 | -2.9259  | 7.51E-28 | 1.53E-27 |
| Psma8     | -5.1683  | 7.32E-28 | 1.49E-27 |
| Ubal2     | -0.50618 | 6.07E-28 | 1.24E-27 |
| Gm48206   | -6.15384 | 7.28E-28 | 1.48E-27 |
| Ptges     | -3.12856 | 6.95E-28 | 1.42E-27 |
| Sp1       | -0.5019  | 5.74E-28 | 1.17E-27 |
| Kcp       | -4.32487 | 6.71E-28 | 1.37E-27 |
| Csf1r     | -3.7382  | 6.57E-28 | 1.34E-27 |
| Ccdc88a   | -0.46617 | 5.33E-28 | 1.09E-27 |
| Rdh5      | -2.55886 | 6.12E-28 | 1.25E-27 |
| Exoc6     | -0.84472 | 5.03E-28 | 1.03E-27 |
| Tubb4a    | -2.33715 | 5.11E-28 | 1.04E-27 |
| Cdc25b    | -2.89644 | 5.35E-28 | 1.09E-27 |
| Fam214b   | -1.18341 | 4.52E-28 | 9.25E-28 |
| Hsp90b1   | -0.2891  | 4.13E-28 | 8.45E-28 |
| Gm19705   | -4.06031 | 5.02E-28 | 1.03E-27 |
| Sox2ot    | -2.48992 | 4.09E-28 | 8.37E-28 |
| E030026E1 | -4.47376 | 4.17E-28 | 8.54E-28 |
| Fcer1g    | -2.37869 | 4.16E-28 | 8.52E-28 |
| Pdgfrl    | -3.22078 | 3.95E-28 | 8.10E-28 |
| Usp43     | -3.78553 | 3.83E-28 | 7.86E-28 |
| Snx1      | -0.68745 | 3.17E-28 | 6.50E-28 |
| Gm43793   | -1.71728 | 3.35E-28 | 6.86E-28 |
| Prkra     | -0.86691 | 3.05E-28 | 6.26E-28 |
| Sncaip    | -5.31914 | 3.51E-28 | 7.20E-28 |
| P2rx7     | -7.32887 | 3.56E-28 | 7.30E-28 |
| Mx2       | -3.84231 | 3.35E-28 | 6.87E-28 |
| Sesn3     | -0.48688 | 2.81E-28 | 5.78E-28 |
| A030001D  | -1.31643 | 2.86E-28 | 5.88E-28 |
| Pfkm      | -1.17954 | 2.84E-28 | 5.84E-28 |
| Rps27rt   | -0.84724 | 2.64E-28 | 5.43E-28 |

|           |          |          |          |
|-----------|----------|----------|----------|
| 1700019L1 | -7.03018 | 3.16E-28 | 6.49E-28 |
| Scp2      | -0.43114 | 2.39E-28 | 4.91E-28 |
| Chadl     | -2.20049 | 2.60E-28 | 5.34E-28 |
| Tent5a    | -4.75785 | 2.82E-28 | 5.80E-28 |
| Rimklb    | -2.33137 | 2.61E-28 | 5.37E-28 |
| Gadd45b   | -0.82554 | 2.17E-28 | 4.47E-28 |
| Tmem215   | -2.95277 | 2.42E-28 | 4.98E-28 |
| Gvin1     | -5.95976 | 2.53E-28 | 5.21E-28 |
| Slc26a10  | -4.44075 | 2.51E-28 | 5.16E-28 |
| Lst1      | -2.90117 | 2.30E-28 | 4.73E-28 |
| Plxna4    | -3.38616 | 2.20E-28 | 4.53E-28 |
| Pcolce2   | -2.27013 | 2.11E-28 | 4.35E-28 |
| Hspb7     | -4.05011 | 2.11E-28 | 4.34E-28 |
| Dhx58os   | -4.9468  | 2.16E-28 | 4.44E-28 |
| Lynx1     | -1.27973 | 1.62E-28 | 3.35E-28 |
| Gm38042   | -3.66089 | 1.75E-28 | 3.60E-28 |
| B230217C  | -2.37893 | 1.68E-28 | 3.47E-28 |
| Dock5     | -2.72688 | 1.53E-28 | 3.15E-28 |
| Speg      | -1.46207 | 1.24E-28 | 2.57E-28 |
| Heph      | -2.36617 | 1.23E-28 | 2.54E-28 |
| Oasl1     | -7.21506 | 1.33E-28 | 2.75E-28 |
| Gm37352   | -7.52901 | 1.27E-28 | 2.62E-28 |
| Necab2    | -1.81414 | 1.14E-28 | 2.35E-28 |
| Sox6      | -1.88737 | 1.09E-28 | 2.25E-28 |
| Zfp982    | -2.37498 | 1.06E-28 | 2.20E-28 |
| Mir703    | -1.21476 | 9.35E-29 | 1.94E-28 |
| Ntng1     | -2.33708 | 9.94E-29 | 2.06E-28 |
| Cacna1e   | -4.36053 | 1.00E-28 | 2.07E-28 |
| Denr      | -0.48543 | 8.18E-29 | 1.70E-28 |
| Kcnt2     | -4.61722 | 8.95E-29 | 1.86E-28 |
| Armcx1    | -0.8587  | 6.99E-29 | 1.45E-28 |
| Arf5      | -0.35426 | 5.79E-29 | 1.20E-28 |
| Pde3b     | -3.00133 | 6.33E-29 | 1.32E-28 |
| Dnajc10   | -0.54802 | 5.19E-29 | 1.08E-28 |
| Sorcs2    | -2.5792  | 5.81E-29 | 1.21E-28 |
| Higd2a    | -0.38283 | 4.96E-29 | 1.03E-28 |
| Lef1os1   | -4.69721 | 5.87E-29 | 1.22E-28 |
| Htr2a     | -4.23614 | 5.59E-29 | 1.16E-28 |
| Zeb1      | -0.43439 | 4.53E-29 | 9.43E-29 |
| Amigo2    | -2.86721 | 5.13E-29 | 1.07E-28 |
| Nlrc5     | -5.94394 | 5.07E-29 | 1.05E-28 |
| Zcchc14   | -0.5802  | 3.95E-29 | 8.23E-29 |
| Mdga2     | -2.14493 | 3.71E-29 | 7.75E-29 |
| Tpra1     | -0.9712  | 3.37E-29 | 7.04E-29 |
| Endou     | -4.80856 | 3.74E-29 | 7.80E-29 |
| Npdc1     | -0.64442 | 3.12E-29 | 6.51E-29 |
| Gabra1    | -2.50516 | 3.51E-29 | 7.34E-29 |

|           |          |          |          |
|-----------|----------|----------|----------|
| Esd       | -0.44432 | 2.93E-29 | 6.13E-29 |
| Abcd1     | -1.44032 | 2.89E-29 | 6.05E-29 |
| Irak4     | -2.15963 | 3.04E-29 | 6.34E-29 |
| Gm2415    | -3.35204 | 3.13E-29 | 6.54E-29 |
| Csad      | -0.84107 | 2.53E-29 | 5.29E-29 |
| Fam135b   | -2.47887 | 2.71E-29 | 5.67E-29 |
| Ankrd29   | -2.56958 | 2.61E-29 | 5.46E-29 |
| Ss18      | -0.72408 | 1.70E-29 | 3.56E-29 |
| Gm44936   | -9.15849 | 1.95E-29 | 4.09E-29 |
| Gm8730    | -1.35946 | 1.63E-29 | 3.41E-29 |
| Rnf44     | -0.71808 | 1.51E-29 | 3.16E-29 |
| Kcnma1    | -1.42733 | 1.65E-29 | 3.46E-29 |
| 2010007H  | -5.11736 | 1.78E-29 | 3.73E-29 |
| Adam22    | -2.15839 | 1.61E-29 | 3.38E-29 |
| Rps23-ps1 | -1.03069 | 1.41E-29 | 2.96E-29 |
| Ids       | -0.69543 | 1.35E-29 | 2.83E-29 |
| Nap1l5    | -1.39933 | 1.33E-29 | 2.79E-29 |
| AW04773C  | -1.41846 | 1.31E-29 | 2.75E-29 |
| Gm3764    | -2.60089 | 1.31E-29 | 2.75E-29 |
| 3010003L2 | -4.21624 | 1.35E-29 | 2.83E-29 |
| Gm20655   | -3.6854  | 1.24E-29 | 2.60E-29 |
| Gm48582   | -3.67052 | 1.16E-29 | 2.44E-29 |
| Tlk1      | -0.58405 | 9.78E-30 | 2.06E-29 |
| Fundc1    | -0.79099 | 9.55E-30 | 2.01E-29 |
| Gm30382   | -4.38911 | 1.06E-29 | 2.24E-29 |
| Xbp1      | -0.53199 | 8.43E-30 | 1.78E-29 |
| Gm37642   | -5.20042 | 9.84E-30 | 2.07E-29 |
| Paqr6     | -2.8376  | 9.11E-30 | 1.92E-29 |
| Bach2     | -2.05315 | 8.07E-30 | 1.70E-29 |
| Tmbim4    | -0.48821 | 7.12E-30 | 1.50E-29 |
| Gask1b    | -4.82257 | 8.05E-30 | 1.70E-29 |
| Adgrl1    | -0.83464 | 6.50E-30 | 1.37E-29 |
| P2ry10b   | -6.05821 | 7.08E-30 | 1.49E-29 |
| Rnf135    | -2.32392 | 6.61E-30 | 1.40E-29 |
| Papss2    | -2.47458 | 6.36E-30 | 1.34E-29 |
| Schip1    | -4.29476 | 6.60E-30 | 1.39E-29 |
| Tpbp      | -2.85122 | 6.21E-30 | 1.31E-29 |
| Armcx4    | -1.52041 | 5.76E-30 | 1.22E-29 |
| Prr5      | -2.86453 | 5.79E-30 | 1.22E-29 |
| Eif4g1    | -0.45038 | 4.74E-30 | 1.00E-29 |
| Psmb1     | -0.36425 | 4.22E-30 | 8.94E-30 |
| S100b     | -2.13164 | 4.56E-30 | 9.66E-30 |
| Hmgn5     | -0.66564 | 3.93E-30 | 8.34E-30 |
| Kcne1l    | -2.43897 | 4.39E-30 | 9.30E-30 |
| Scn7a     | -2.19396 | 4.24E-30 | 8.99E-30 |
| Cebpa     | -4.73605 | 4.14E-30 | 8.78E-30 |
| Arl4c     | -2.68998 | 3.16E-30 | 6.71E-30 |

|           |          |          |          |
|-----------|----------|----------|----------|
| Cnpy4     | -1.43174 | 2.58E-30 | 5.49E-30 |
| A930006Kl | -2.26446 | 2.58E-30 | 5.49E-30 |
| Kcnk6     | -5.28003 | 2.77E-30 | 5.89E-30 |
| Micos13   | -0.42641 | 2.20E-30 | 4.69E-30 |
| Cltc      | -0.36213 | 1.86E-30 | 3.97E-30 |
| Runx1     | -4.22459 | 2.13E-30 | 4.53E-30 |
| Hjurp     | -2.17183 | 1.99E-30 | 4.24E-30 |
| Ccng2     | -0.99486 | 1.79E-30 | 3.81E-30 |
| Hebp2     | -1.61116 | 1.65E-30 | 3.52E-30 |
| Ptpfr     | -1.64041 | 1.61E-30 | 3.44E-30 |
| Gpr161    | -4.62968 | 1.71E-30 | 3.64E-30 |
| Uhrf1bp1l | -1.60277 | 1.38E-30 | 2.94E-30 |
| Tmem158   | -2.62737 | 1.45E-30 | 3.09E-30 |
| Aldh1l1   | -2.34329 | 1.30E-30 | 2.78E-30 |
| B3gat3    | -0.7337  | 9.34E-31 | 2.00E-30 |
| Plcd1     | -2.96928 | 9.65E-31 | 2.06E-30 |
| Cdca7     | -2.43592 | 9.31E-31 | 1.99E-30 |
| Saysd1    | -0.84084 | 8.37E-31 | 1.79E-30 |
| Tmem14a   | -1.67885 | 8.11E-31 | 1.74E-30 |
| Rida      | -0.84597 | 6.75E-31 | 1.45E-30 |
| Kcnq4     | -4.19272 | 7.54E-31 | 1.62E-30 |
| Glod4     | -0.8136  | 5.87E-31 | 1.26E-30 |
| Nosip     | -0.74701 | 5.82E-31 | 1.25E-30 |
| Epdr1     | -3.03844 | 6.33E-31 | 1.36E-30 |
| Dpm3      | -0.39809 | 4.86E-31 | 1.04E-30 |
| Zfp52     | -2.43044 | 5.19E-31 | 1.12E-30 |
| Gm36933   | -6.70699 | 5.66E-31 | 1.21E-30 |
| Pvr       | -1.07318 | 4.56E-31 | 9.82E-31 |
| Mapk7     | -1.95205 | 4.85E-31 | 1.04E-30 |
| Robo2     | -2.02698 | 4.18E-31 | 9.00E-31 |
| Pip4k2a   | -1.24968 | 3.85E-31 | 8.28E-31 |
| Vegfd     | -6.26642 | 4.49E-31 | 9.67E-31 |
| Smim20    | -1.08316 | 3.57E-31 | 7.70E-31 |
| Gldc      | -1.58026 | 3.52E-31 | 7.60E-31 |
| Frmd8     | -1.47754 | 3.23E-31 | 6.95E-31 |
| Micall2   | -4.84969 | 3.66E-31 | 7.88E-31 |
| Zbp1      | -6.29161 | 3.45E-31 | 7.43E-31 |
| Muc3a     | -3.28779 | 3.20E-31 | 6.89E-31 |
| Prps2     | -3.97369 | 3.00E-31 | 6.47E-31 |
| Snx2      | -0.68447 | 2.44E-31 | 5.27E-31 |
| Trappc2l  | -0.58531 | 2.36E-31 | 5.11E-31 |
| D630033O  | -1.20197 | 2.51E-31 | 5.42E-31 |
| Gabrr1    | -2.64503 | 2.53E-31 | 5.46E-31 |
| Trappc6a  | -0.7714  | 2.20E-31 | 4.76E-31 |
| Psma7     | -0.3432  | 2.02E-31 | 4.36E-31 |
| Psma4     | -0.42962 | 1.58E-31 | 3.44E-31 |
| Tspan17   | -0.74906 | 1.49E-31 | 3.23E-31 |

|           |          |          |          |
|-----------|----------|----------|----------|
| Vav2      | -3.33396 | 1.76E-31 | 3.81E-31 |
| 2900052L1 | -1.82469 | 1.61E-31 | 3.50E-31 |
| Cap2      | -2.81202 | 1.63E-31 | 3.52E-31 |
| Gm37760   | -3.2151  | 1.65E-31 | 3.57E-31 |
| Commd8    | -0.82248 | 1.35E-31 | 2.92E-31 |
| Norad     | -0.45491 | 1.30E-31 | 2.83E-31 |
| Rhou      | -2.07929 | 1.41E-31 | 3.06E-31 |
| Clip1     | -0.42751 | 1.14E-31 | 2.47E-31 |
| Acot1     | -2.62296 | 1.31E-31 | 2.84E-31 |
| Heca      | -0.77242 | 1.16E-31 | 2.51E-31 |
| Aamdc     | -0.63276 | 8.85E-32 | 1.93E-31 |
| Slc8a1    | -2.64968 | 8.82E-32 | 1.92E-31 |
| Spin1     | -0.6637  | 7.61E-32 | 1.66E-31 |
| Zfp524    | -1.38444 | 8.16E-32 | 1.78E-31 |
| Iah1      | -1.16038 | 7.80E-32 | 1.70E-31 |
| Adam11    | -2.70347 | 8.34E-32 | 1.82E-31 |
| Rasa4     | -1.91547 | 7.90E-32 | 1.72E-31 |
| Tet1      | -1.39504 | 6.99E-32 | 1.53E-31 |
| Oplah     | -1.88896 | 6.98E-32 | 1.52E-31 |
| Tbx15     | -5.68362 | 7.96E-32 | 1.73E-31 |
| Al661453  | -5.13687 | 7.96E-32 | 1.73E-31 |
| Phlda3    | -2.89417 | 6.97E-32 | 1.52E-31 |
| Adam17    | -0.78889 | 5.99E-32 | 1.31E-31 |
| Rfxap     | -0.81322 | 5.82E-32 | 1.27E-31 |
| Syt4      | -2.09255 | 6.45E-32 | 1.41E-31 |
| Per1      | -0.74604 | 5.90E-32 | 1.29E-31 |
| Fam171a2  | -2.30685 | 6.02E-32 | 1.32E-31 |
| Gm37954   | -1.87484 | 5.91E-32 | 1.29E-31 |
| Rras2     | -1.09536 | 4.92E-32 | 1.08E-31 |
| Rrm2b     | -0.72014 | 4.47E-32 | 9.80E-32 |
| Tcp11l2   | -0.83553 | 4.41E-32 | 9.68E-32 |
| Pcp2      | -1.00159 | 4.73E-32 | 1.04E-31 |
| Tnfrsf10b | -3.91618 | 4.78E-32 | 1.05E-31 |
| Ndufa3    | -0.39733 | 3.66E-32 | 8.04E-32 |
| Casp4     | -6.15326 | 3.75E-32 | 8.23E-32 |
| Ube2e1    | -0.626   | 2.91E-32 | 6.40E-32 |
| Trarg1    | -3.86096 | 2.90E-32 | 6.38E-32 |
| Ptdss1    | -1.15523 | 2.45E-32 | 5.38E-32 |
| Gm17745   | -3.38255 | 2.46E-32 | 5.41E-32 |
| Ctss      | -3.72281 | 2.60E-32 | 5.72E-32 |
| Egfr      | -2.43561 | 2.34E-32 | 5.14E-32 |
| 4930522L1 | -2.13121 | 2.26E-32 | 4.99E-32 |
| Mlkl      | -7.69589 | 2.08E-32 | 4.58E-32 |
| Fam110b   | -3.10862 | 1.78E-32 | 3.92E-32 |
| Myh14     | -1.73122 | 1.75E-32 | 3.86E-32 |
| Xpc       | -0.86045 | 1.47E-32 | 3.24E-32 |
| Tmie      | -5.19296 | 1.71E-32 | 3.78E-32 |

|          |          |          |          |
|----------|----------|----------|----------|
| Tmem132i | -1.69128 | 1.38E-32 | 3.06E-32 |
| Marchf6  | -0.59285 | 1.23E-32 | 2.72E-32 |
| Fzd1     | -4.10546 | 1.02E-32 | 2.25E-32 |
| Myh10    | -0.74372 | 7.73E-33 | 1.72E-32 |
| Samd1    | -1.54448 | 7.70E-33 | 1.71E-32 |
| Tusc1    | -3.04645 | 7.94E-33 | 1.76E-32 |
| Rit2     | -2.01534 | 6.26E-33 | 1.39E-32 |
| Eif3h    | -0.37115 | 5.44E-33 | 1.21E-32 |
| Paip2    | -0.39151 | 5.03E-33 | 1.12E-32 |
| Nr3c1    | -0.39852 | 4.71E-33 | 1.05E-32 |
| Cacna1h  | -1.93301 | 3.93E-33 | 8.76E-33 |
| Gm26510  | -5.39319 | 4.09E-33 | 9.12E-33 |
| Dennd2c  | -2.44599 | 3.47E-33 | 7.75E-33 |
| Prrc1    | -0.76545 | 2.86E-33 | 6.38E-33 |
| Tst      | -2.56116 | 3.26E-33 | 7.27E-33 |
| Nckap5   | -1.95455 | 2.99E-33 | 6.66E-33 |
| Psmg4    | -0.69644 | 2.63E-33 | 5.87E-33 |
| Nuak2    | -3.52414 | 2.91E-33 | 6.49E-33 |
| Ncstn    | -0.83295 | 2.40E-33 | 5.36E-33 |
| Kazald1  | -1.47086 | 2.48E-33 | 5.53E-33 |
| Gypc     | -6.21832 | 2.93E-33 | 6.53E-33 |
| Sav1     | -0.67692 | 1.80E-33 | 4.04E-33 |
| Ciart    | -2.24139 | 2.09E-33 | 4.67E-33 |
| Anp32b   | -0.42763 | 1.73E-33 | 3.89E-33 |
| Gm37452  | -3.70358 | 2.19E-33 | 4.89E-33 |
| Gm48601  | -5.5495  | 2.16E-33 | 4.84E-33 |
| Thbs2    | -5.76397 | 2.25E-33 | 5.04E-33 |
| Kifc3    | -0.7868  | 1.61E-33 | 3.62E-33 |
| Gm37652  | -6.98223 | 2.08E-33 | 4.66E-33 |
| Col4a6   | -4.26673 | 1.89E-33 | 4.23E-33 |
| Tlcd2    | -4.24318 | 1.61E-33 | 3.60E-33 |
| Samd14   | -1.48354 | 1.35E-33 | 3.04E-33 |
| Plxnb2   | -1.00814 | 1.23E-33 | 2.77E-33 |
| Drd1     | -3.4833  | 1.20E-33 | 2.68E-33 |
| Ptpa     | -0.73323 | 8.98E-34 | 2.02E-33 |
| Npw      | -5.28761 | 1.11E-33 | 2.50E-33 |
| Scamp3   | -0.90976 | 8.21E-34 | 1.85E-33 |
| Baiap3   | -3.45589 | 9.09E-34 | 2.04E-33 |
| Plod3    | -1.0009  | 7.54E-34 | 1.70E-33 |
| Slc29a3  | -2.28639 | 8.60E-34 | 1.93E-33 |
| Tcf23    | -4.97636 | 7.52E-34 | 1.69E-33 |
| Sec11c   | -0.58218 | 5.71E-34 | 1.29E-33 |
| Dynlrb1  | -0.39375 | 5.48E-34 | 1.23E-33 |
| Msl1     | -0.54035 | 4.74E-34 | 1.07E-33 |
| Xpr1     | -0.51847 | 4.73E-34 | 1.07E-33 |
| Mfhas1   | -0.51947 | 4.60E-34 | 1.04E-33 |
| Eif3i    | -0.54402 | 4.36E-34 | 9.83E-34 |

|          |          |          |          |
|----------|----------|----------|----------|
| Pwwp3a   | -0.89958 | 4.42E-34 | 9.99E-34 |
| C1qc     | -4.06931 | 5.18E-34 | 1.17E-33 |
| Mmgt2    | -1.06139 | 3.46E-34 | 7.82E-34 |
| Hmbox1   | -0.63164 | 3.18E-34 | 7.19E-34 |
| Chpt1    | -0.77378 | 3.17E-34 | 7.17E-34 |
| Cyth4    | -5.22217 | 3.31E-34 | 7.48E-34 |
| Bmp4     | -4.80757 | 3.12E-34 | 7.06E-34 |
| Adora1   | -2.10046 | 2.71E-34 | 6.13E-34 |
| Gstk1    | -1.67575 | 2.54E-34 | 5.76E-34 |
| Zdhhc9   | -1.30857 | 2.42E-34 | 5.50E-34 |
| Shf      | -2.14339 | 2.46E-34 | 5.58E-34 |
| Map7d2   | -1.51391 | 2.29E-34 | 5.19E-34 |
| Gm48203  | -5.89145 | 2.75E-34 | 6.24E-34 |
| Adcy9    | -1.2416  | 2.09E-34 | 4.75E-34 |
| Galnt17  | -2.78054 | 2.25E-34 | 5.10E-34 |
| Pdk4     | -4.45838 | 2.37E-34 | 5.39E-34 |
| Gm10575  | -4.21315 | 2.34E-34 | 5.31E-34 |
| C1qtnf6  | -3.69525 | 2.31E-34 | 5.25E-34 |
| Tmed7    | -0.60954 | 1.74E-34 | 3.95E-34 |
| Mab21l2  | -2.03184 | 1.96E-34 | 4.47E-34 |
| Fkbp11   | -2.45945 | 1.95E-34 | 4.43E-34 |
| Eif6     | -0.61173 | 1.50E-34 | 3.42E-34 |
| Rhbdf2   | -1.12453 | 1.60E-34 | 3.64E-34 |
| Chst7    | -5.67701 | 1.86E-34 | 4.22E-34 |
| Cchcr1   | -4.18493 | 1.72E-34 | 3.91E-34 |
| Pxdn     | -2.93108 | 1.42E-34 | 3.24E-34 |
| Mfap2    | -3.64787 | 1.38E-34 | 3.13E-34 |
| Gstt3    | -2.46788 | 1.27E-34 | 2.90E-34 |
| Wnt5a    | -3.3568  | 1.27E-34 | 2.90E-34 |
| Laptm5   | -4.84954 | 1.21E-34 | 2.76E-34 |
| Dctn2    | -0.51253 | 8.35E-35 | 1.91E-34 |
| Zfp9     | -2.97182 | 1.03E-34 | 2.36E-34 |
| Mapk10   | -2.20496 | 8.42E-35 | 1.92E-34 |
| Fam217a  | -6.40149 | 9.01E-35 | 2.06E-34 |
| Tceal8   | -0.73491 | 6.62E-35 | 1.52E-34 |
| Tceal5   | -2.17047 | 6.56E-35 | 1.50E-34 |
| Fam162a  | -0.50167 | 5.44E-35 | 1.25E-34 |
| 4931406C | -1.08042 | 5.28E-35 | 1.21E-34 |
| Gm10687  | -3.7281  | 5.72E-35 | 1.31E-34 |
| Sh3d21   | -3.94183 | 5.73E-35 | 1.31E-34 |
| Mcur1    | -0.824   | 4.46E-35 | 1.02E-34 |
| Gm18068  | -7.03525 | 5.76E-35 | 1.32E-34 |
| Rab35    | -0.86112 | 4.06E-35 | 9.31E-35 |
| Frk      | -4.07559 | 4.53E-35 | 1.04E-34 |
| Chil1    | -2.55842 | 4.06E-35 | 9.31E-35 |
| Olfm4    | -2.41291 | 3.91E-35 | 8.97E-35 |
| Psenen   | -0.49419 | 3.07E-35 | 7.06E-35 |



|           |          |          |          |
|-----------|----------|----------|----------|
| Zap70     | -4.39117 | 3.62E-35 | 8.31E-35 |
| Cabp5     | -2.04188 | 3.32E-35 | 7.62E-35 |
| Fbxo6     | -1.09667 | 2.68E-35 | 6.16E-35 |
| St3gal2   | -0.9827  | 2.52E-35 | 5.80E-35 |
| Plaur     | -4.79998 | 3.22E-35 | 7.39E-35 |
| Eif3f     | -0.34198 | 2.18E-35 | 5.03E-35 |
| Tor4a     | -4.54239 | 2.60E-35 | 5.98E-35 |
| Aim2      | -4.34133 | 2.36E-35 | 5.44E-35 |
| Fam124b   | -5.43518 | 2.36E-35 | 5.44E-35 |
| Psmb3     | -0.4345  | 1.45E-35 | 3.34E-35 |
| B630019Kl | -3.63475 | 1.79E-35 | 4.13E-35 |
| Dgkg      | -4.76718 | 1.85E-35 | 4.27E-35 |
| Pdlim7    | -0.91003 | 1.36E-35 | 3.13E-35 |
| Lmod1     | -2.46117 | 1.38E-35 | 3.19E-35 |
| Gm15261   | -4.17343 | 1.42E-35 | 3.27E-35 |
| Fgf13     | -1.93984 | 1.28E-35 | 2.96E-35 |
| Myzap     | -5.52557 | 1.35E-35 | 3.12E-35 |
| Aldh9a1   | -0.80499 | 9.99E-36 | 2.31E-35 |
| Myd88     | -1.87878 | 9.98E-36 | 2.31E-35 |
| Cox7a2l   | -0.3382  | 7.47E-36 | 1.73E-35 |
| Glg1      | -0.48375 | 7.46E-36 | 1.73E-35 |
| Lpcat4    | -4.05275 | 9.05E-36 | 2.10E-35 |
| Mrgpre    | -3.84189 | 8.12E-36 | 1.88E-35 |
| Aopep     | -0.61685 | 6.01E-36 | 1.40E-35 |
| Grb7      | -5.47366 | 7.35E-36 | 1.71E-35 |
| C1qb      | -3.70831 | 6.97E-36 | 1.62E-35 |
| Ramp1     | -3.01082 | 5.67E-36 | 1.32E-35 |
| Vrk2      | -3.80158 | 5.36E-36 | 1.25E-35 |
| Pde1b     | -2.47992 | 5.21E-36 | 1.21E-35 |
| Rpl3l     | -4.78614 | 5.58E-36 | 1.30E-35 |
| Hacd4     | -5.516   | 5.66E-36 | 1.32E-35 |
| Lypd6     | -1.92491 | 4.93E-36 | 1.15E-35 |
| Ntrk2     | -2.75936 | 4.84E-36 | 1.13E-35 |
| Spred1    | -0.64985 | 3.92E-36 | 9.12E-36 |
| Zfp217    | -1.86434 | 4.12E-36 | 9.58E-36 |
| Cdr2l     | -1.84113 | 3.83E-36 | 8.93E-36 |
| Qpct      | -2.65945 | 3.76E-36 | 8.75E-36 |
| Nr5a2     | -5.13425 | 4.06E-36 | 9.46E-36 |
| Prune2    | -1.40595 | 3.00E-36 | 6.99E-36 |
| C1qa      | -4.08243 | 3.22E-36 | 7.50E-36 |
| Synj2     | -4.36392 | 2.88E-36 | 6.72E-36 |
| Cacna1a   | -1.6754  | 2.16E-36 | 5.05E-36 |
| Zbtb42    | -3.49053 | 2.56E-36 | 5.98E-36 |
| Colca2    | -3.85935 | 2.39E-36 | 5.58E-36 |
| Prrg2     | -1.35049 | 1.86E-36 | 4.36E-36 |
| Gm43820   | -6.5455  | 2.33E-36 | 5.45E-36 |
| Zbtb11os1 | -2.45588 | 1.90E-36 | 4.45E-36 |

|           |          |          |          |
|-----------|----------|----------|----------|
| Akr1b3    | -0.85756 | 1.58E-36 | 3.70E-36 |
| Nsg1      | -3.06712 | 1.79E-36 | 4.19E-36 |
| Zfp697    | -5.06081 | 1.93E-36 | 4.53E-36 |
| Ppil3     | -2.32472 | 1.58E-36 | 3.70E-36 |
| Lnpep     | -0.57172 | 1.37E-36 | 3.21E-36 |
| Gm4951    | -9.0451  | 1.81E-36 | 4.23E-36 |
| Rbm24     | -4.0977  | 1.45E-36 | 3.39E-36 |
| 5033404E: | -7.15693 | 1.40E-36 | 3.27E-36 |
| Ehd4      | -0.62516 | 9.58E-37 | 2.25E-36 |
| Sh2d3c    | -0.96989 | 9.19E-37 | 2.16E-36 |
| Col2a1    | -1.95185 | 9.14E-37 | 2.15E-36 |
| Fbxl8     | -3.71658 | 9.65E-37 | 2.26E-36 |
| Cyp7b1    | -4.09817 | 9.73E-37 | 2.28E-36 |
| Bpnt2     | -0.68834 | 7.39E-37 | 1.74E-36 |
| Rab29     | -3.10278 | 8.88E-37 | 2.09E-36 |
| Pdcl3     | -0.59844 | 6.86E-37 | 1.61E-36 |
| Mycl      | -5.57152 | 8.20E-37 | 1.93E-36 |
| lqsec3    | -1.83966 | 6.35E-37 | 1.50E-36 |
| Mrps15    | -0.91788 | 5.54E-37 | 1.31E-36 |
| Dbn1      | -2.59911 | 6.31E-37 | 1.49E-36 |
| Spsb2     | -1.51594 | 5.24E-37 | 1.24E-36 |
| Map4      | -0.3907  | 4.65E-37 | 1.10E-36 |
| Trim62    | -4.16629 | 6.15E-37 | 1.45E-36 |
| Clmn      | -2.71141 | 6.01E-37 | 1.42E-36 |
| Dpy19l3   | -2.81068 | 5.84E-37 | 1.38E-36 |
| Srms      | -5.83111 | 6.46E-37 | 1.52E-36 |
| Tpst1     | -1.15765 | 4.26E-37 | 1.01E-36 |
| S100a4    | -1.61445 | 4.74E-37 | 1.12E-36 |
| Dclk2     | -2.80247 | 4.48E-37 | 1.06E-36 |
| Nkd2      | -4.64312 | 4.72E-37 | 1.11E-36 |
| Gm50008   | -1.2151  | 3.76E-37 | 8.90E-37 |
| Bhlhe22   | -3.51288 | 4.10E-37 | 9.70E-37 |
| Dhx40     | -0.91264 | 3.19E-37 | 7.56E-37 |
| F3        | -3.08871 | 3.98E-37 | 9.41E-37 |
| Alox12    | -5.79731 | 4.06E-37 | 9.60E-37 |
| Cacna1d   | -2.38485 | 3.37E-37 | 7.97E-37 |
| Diaph2    | -0.98806 | 2.86E-37 | 6.77E-37 |
| Uap1l1    | -4.02539 | 3.56E-37 | 8.43E-37 |
| Taf9b     | -1.48573 | 2.87E-37 | 6.80E-37 |
| Dtx4      | -2.14402 | 2.83E-37 | 6.72E-37 |
| Tcaf2     | -3.73789 | 2.99E-37 | 7.07E-37 |
| Ccdc125   | -3.46491 | 2.96E-37 | 7.02E-37 |
| Cend1     | -2.62879 | 2.69E-37 | 6.38E-37 |
| Gm44694   | -1.86192 | 2.53E-37 | 6.01E-37 |
| Man2b2    | -1.84343 | 1.83E-37 | 4.34E-37 |
| Jak3      | -4.01931 | 1.99E-37 | 4.73E-37 |
| Tyrobp    | -3.73945 | 1.88E-37 | 4.47E-37 |

|          |          |          |          |
|----------|----------|----------|----------|
| Ttc23    | -2.14216 | 1.48E-37 | 3.52E-37 |
| Omd      | -5.21934 | 1.74E-37 | 4.13E-37 |
| Nr2e1    | -2.25926 | 1.52E-37 | 3.62E-37 |
| Fkbp2    | -0.56106 | 1.06E-37 | 2.52E-37 |
| Pi16     | -3.82657 | 1.43E-37 | 3.41E-37 |
| Actn1    | -0.5877  | 9.85E-38 | 2.35E-37 |
| Car10    | -2.50129 | 1.15E-37 | 2.73E-37 |
| Zfp618   | -3.66603 | 1.17E-37 | 2.79E-37 |
| Lrrc75a  | -2.59505 | 9.99E-38 | 2.38E-37 |
| Snx6     | -0.63349 | 7.84E-38 | 1.87E-37 |
| Mgmt     | -3.0953  | 9.09E-38 | 2.17E-37 |
| Ica1l    | -2.78481 | 6.84E-38 | 1.64E-37 |
| Sp140    | -2.44794 | 6.19E-38 | 1.48E-37 |
| Sema4c   | -1.07603 | 5.68E-38 | 1.36E-37 |
| Itprp    | -6.62523 | 6.95E-38 | 1.66E-37 |
| Trim5    | -4.83739 | 6.34E-38 | 1.52E-37 |
| Ppp1r13b | -0.64424 | 4.38E-38 | 1.05E-37 |
| Tubb2b   | -2.97023 | 5.41E-38 | 1.30E-37 |
| Greb1    | -2.18348 | 4.56E-38 | 1.09E-37 |
| Plekho1  | -1.60826 | 3.82E-38 | 9.18E-38 |
| Hid1     | -2.42418 | 3.85E-38 | 9.24E-38 |
| Rmst     | -3.44063 | 4.28E-38 | 1.03E-37 |
| Limk1    | -2.20649 | 3.75E-38 | 8.99E-38 |
| Lepr     | -5.69136 | 4.49E-38 | 1.08E-37 |
| Itgb8    | -2.15149 | 3.88E-38 | 9.31E-38 |
| Atp1b1   | -2.38794 | 3.11E-38 | 7.48E-38 |
| Cystm1   | -0.61719 | 2.60E-38 | 6.25E-38 |
| Arhgef9  | -1.51576 | 2.59E-38 | 6.23E-38 |
| Egln2    | -0.76782 | 2.22E-38 | 5.35E-38 |
| Sh3tc2   | -5.01095 | 3.08E-38 | 7.40E-38 |
| Bzw1     | -0.50095 | 2.04E-38 | 4.90E-38 |
| Rasl11a  | -1.10109 | 1.98E-38 | 4.76E-38 |
| Gm14636  | -7.153   | 2.65E-38 | 6.38E-38 |
| Cep170   | -0.99976 | 1.85E-38 | 4.47E-38 |
| Gm43343  | -1.36077 | 1.95E-38 | 4.70E-38 |
| Tbcb     | -0.57975 | 1.70E-38 | 4.10E-38 |
| Enpp4    | -0.83036 | 1.69E-38 | 4.09E-38 |
| Neurod4  | -2.32212 | 1.89E-38 | 4.57E-38 |
| Gm12002  | -4.80251 | 1.73E-38 | 4.18E-38 |
| Strn3    | -0.44272 | 1.23E-38 | 2.97E-38 |
| Wdsub1   | -1.38824 | 1.27E-38 | 3.06E-38 |
| Gnai1    | -3.42157 | 1.51E-38 | 3.64E-38 |
| Gm17750  | -1.34117 | 1.23E-38 | 2.98E-38 |
| Naprt    | -3.85204 | 1.52E-38 | 3.67E-38 |
| Lrig3    | -3.03856 | 1.25E-38 | 3.01E-38 |
| Tmed3    | -0.78741 | 9.71E-39 | 2.35E-38 |
| Col3a1   | -4.39293 | 1.29E-38 | 3.12E-38 |

|          |          |          |          |
|----------|----------|----------|----------|
| Fam131a  | -3.22368 | 1.18E-38 | 2.86E-38 |
| Rbm43    | -3.32803 | 1.13E-38 | 2.74E-38 |
| Tox      | -1.5177  | 9.97E-39 | 2.41E-38 |
| Trpc3    | -1.1627  | 8.82E-39 | 2.14E-38 |
| Sptssa   | -0.44586 | 7.65E-39 | 1.85E-38 |
| Pik3cd   | -3.96223 | 1.02E-38 | 2.47E-38 |
| Hspa1a   | -0.53143 | 7.55E-39 | 1.83E-38 |
| Tmem43   | -1.48216 | 7.29E-39 | 1.77E-38 |
| Fendrr   | -4.41955 | 9.05E-39 | 2.19E-38 |
| Adk      | -1.11967 | 6.79E-39 | 1.65E-38 |
| Gap43    | -1.81795 | 6.64E-39 | 1.61E-38 |
| Vps28    | -0.50427 | 5.46E-39 | 1.33E-38 |
| Renbp    | -3.39103 | 6.72E-39 | 1.63E-38 |
| Trmt9b   | -3.33977 | 6.24E-39 | 1.51E-38 |
| Gm37531  | -1.266   | 4.93E-39 | 1.20E-38 |
| Zfp422   | -0.86637 | 3.80E-39 | 9.27E-39 |
| Nphp3    | -3.04001 | 5.05E-39 | 1.23E-38 |
| Pygl     | -2.53871 | 4.74E-39 | 1.15E-38 |
| Cabp1    | -2.30985 | 4.19E-39 | 1.02E-38 |
| Ext2     | -0.86148 | 3.33E-39 | 8.11E-39 |
| Cd44     | -2.5514  | 4.22E-39 | 1.03E-38 |
| Canx     | -0.41958 | 2.62E-39 | 6.38E-39 |
| Rpsa     | -0.3313  | 2.26E-39 | 5.51E-39 |
| Churc1   | -0.71106 | 2.29E-39 | 5.60E-39 |
| Slfn3    | -5.89476 | 2.75E-39 | 6.71E-39 |
| Ctnn     | -0.87105 | 1.62E-39 | 3.96E-39 |
| Fbxw17   | -4.63811 | 2.12E-39 | 5.17E-39 |
| Neur12   | -3.24396 | 1.87E-39 | 4.57E-39 |
| Smim4    | -1.10459 | 1.44E-39 | 3.53E-39 |
| Stard5   | -2.64394 | 1.58E-39 | 3.85E-39 |
| C1qtnf7  | -5.2137  | 1.80E-39 | 4.41E-39 |
| Klk8     | -5.11568 | 1.73E-39 | 4.24E-39 |
| B3galnt1 | -3.35041 | 1.42E-39 | 3.47E-39 |
| Parp10   | -2.01722 | 1.23E-39 | 3.03E-39 |
| Smarcd3  | -2.55723 | 9.19E-40 | 2.26E-39 |
| Gm11478  | -0.87274 | 6.28E-40 | 1.54E-39 |
| Il1rap   | -3.04561 | 7.59E-40 | 1.86E-39 |
| Rab1b    | -0.68791 | 5.27E-40 | 1.30E-39 |
| Isl1     | -2.45198 | 6.34E-40 | 1.56E-39 |
| 1810073O | -5.38571 | 6.60E-40 | 1.62E-39 |
| Lrrc75b  | -2.06505 | 5.33E-40 | 1.31E-39 |
| Lrrc4    | -2.2312  | 4.80E-40 | 1.18E-39 |
| Aprt     | -0.87162 | 3.89E-40 | 9.59E-40 |
| Abi3     | -2.8314  | 4.89E-40 | 1.21E-39 |
| MIph     | -5.80282 | 4.69E-40 | 1.16E-39 |
| Emd      | -0.82538 | 2.82E-40 | 6.98E-40 |
| Tmx4     | -0.66308 | 2.06E-40 | 5.09E-40 |

|            |          |          |          |
|------------|----------|----------|----------|
| Adcy5      | -2.59811 | 2.39E-40 | 5.91E-40 |
| Stat1      | -0.83314 | 1.94E-40 | 4.79E-40 |
| Vil1       | -2.97972 | 2.29E-40 | 5.65E-40 |
| 4930503L1  | -1.17752 | 1.33E-40 | 3.31E-40 |
| Scara3     | -2.80263 | 1.51E-40 | 3.73E-40 |
| Chst14     | -2.93651 | 1.45E-40 | 3.58E-40 |
| Micall1    | -1.47821 | 1.05E-40 | 2.59E-40 |
| Osbp15     | -2.4388  | 1.06E-40 | 2.64E-40 |
| Gm42993    | -3.39009 | 8.90E-41 | 2.21E-40 |
| Hivep1     | -0.72115 | 6.11E-41 | 1.52E-40 |
| St8sia2    | -2.37739 | 7.86E-41 | 1.95E-40 |
| Col5a2     | -5.13118 | 8.80E-41 | 2.18E-40 |
| Ap2b1      | -0.65651 | 5.68E-41 | 1.41E-40 |
| Fam76a     | -0.58842 | 5.38E-41 | 1.34E-40 |
| Ptgis      | -3.58193 | 5.35E-41 | 1.33E-40 |
| Dtd1       | -1.0067  | 3.70E-41 | 9.21E-41 |
| Adgrg6     | -2.84677 | 4.34E-41 | 1.08E-40 |
| Ccdc8      | -3.48554 | 3.46E-41 | 8.63E-41 |
| Grid2      | -2.77776 | 2.99E-41 | 7.46E-41 |
| Dok4       | -1.64933 | 2.56E-41 | 6.39E-41 |
| 4933431E1  | -2.32934 | 2.40E-41 | 6.00E-41 |
| Acy3       | -4.31041 | 2.57E-41 | 6.41E-41 |
| Enpp3      | -6.79044 | 2.70E-41 | 6.74E-41 |
| Tlcd4      | -2.83255 | 2.31E-41 | 5.76E-41 |
| Nme2       | -3.67803 | 2.08E-41 | 5.20E-41 |
| Aatk       | -2.57071 | 1.84E-41 | 4.60E-41 |
| Pcp4       | -1.20447 | 1.52E-41 | 3.81E-41 |
| Sybu       | -2.70992 | 1.52E-41 | 3.82E-41 |
| Gng13      | -1.15479 | 1.17E-41 | 2.93E-41 |
| Mvb12b     | -1.29948 | 9.66E-42 | 2.42E-41 |
| Il15       | -3.11406 | 1.11E-41 | 2.79E-41 |
| Boc        | -4.27027 | 1.23E-41 | 3.09E-41 |
| Bnip3      | -0.60975 | 7.67E-42 | 1.93E-41 |
| Slc52a2    | -1.11632 | 7.93E-42 | 1.99E-41 |
| Furin      | -0.78519 | 7.03E-42 | 1.77E-41 |
| Rps15a-ps1 | -0.70817 | 6.88E-42 | 1.73E-41 |
| Resf1      | -0.74349 | 6.61E-42 | 1.66E-41 |
| Ngf        | -4.88202 | 9.74E-42 | 2.44E-41 |
| Ccdc3      | -4.85406 | 9.80E-42 | 2.46E-41 |
| Limd2      | -2.46649 | 8.19E-42 | 2.06E-41 |
| Rab8b      | -1.04042 | 6.43E-42 | 1.62E-41 |
| Selenok    | -0.36778 | 5.74E-42 | 1.45E-41 |
| Nudt14     | -0.99915 | 5.84E-42 | 1.47E-41 |
| Adam23     | -2.67707 | 7.34E-42 | 1.85E-41 |
| Spag9      | -0.42168 | 4.57E-42 | 1.15E-41 |
| C130023A   | -4.16315 | 6.30E-42 | 1.59E-41 |
| Gm39822    | -5.10211 | 6.36E-42 | 1.60E-41 |

|           |          |          |          |
|-----------|----------|----------|----------|
| Tuba1c    | -4.61159 | 5.97E-42 | 1.51E-41 |
| Fgf1      | -3.408   | 5.10E-42 | 1.29E-41 |
| Colgalt2  | -3.268   | 4.81E-42 | 1.22E-41 |
| Mansc1    | -4.53829 | 4.62E-42 | 1.17E-41 |
| Mesd      | -0.88166 | 3.11E-42 | 7.87E-42 |
| Snrpg     | -0.4637  | 2.78E-42 | 7.05E-42 |
| Snx33     | -3.73094 | 4.23E-42 | 1.07E-41 |
| Sdk2      | -2.35693 | 2.86E-42 | 7.24E-42 |
| Mfsd1     | -1.13065 | 2.04E-42 | 5.18E-42 |
| Dcxr      | -2.64895 | 2.47E-42 | 6.25E-42 |
| 9430038I0 | -1.76632 | 2.08E-42 | 5.27E-42 |
| Tmem510   | -4.83738 | 2.44E-42 | 6.18E-42 |
| Peli1     | -0.56238 | 1.55E-42 | 3.95E-42 |
| Prickle2  | -2.04285 | 1.88E-42 | 4.77E-42 |
| Cdc37     | -0.52838 | 1.29E-42 | 3.29E-42 |
| Ccdc61    | -2.44138 | 1.53E-42 | 3.90E-42 |
| A330009N  | -4.30205 | 1.70E-42 | 4.32E-42 |
| Cdyl2     | -6.80438 | 1.80E-42 | 4.56E-42 |
| Tmem189   | -1.10403 | 9.39E-43 | 2.39E-42 |
| Nedd8     | -0.39817 | 7.97E-43 | 2.03E-42 |
| Tesc      | -3.76265 | 1.10E-42 | 2.80E-42 |
| Crat      | -1.70526 | 8.61E-43 | 2.19E-42 |
| Apobec1   | -4.79627 | 1.09E-42 | 2.76E-42 |
| Cdc25a    | -2.58787 | 8.42E-43 | 2.14E-42 |
| Siae      | -2.77396 | 7.81E-43 | 1.99E-42 |
| Ccdc71l   | -1.34592 | 6.41E-43 | 1.64E-42 |
| Trpm1     | -1.92408 | 7.60E-43 | 1.94E-42 |
| Gm38292   | -7.87517 | 8.99E-43 | 2.29E-42 |
| Mob1a     | -0.67973 | 5.40E-43 | 1.38E-42 |
| Ptprz1    | -2.42108 | 7.29E-43 | 1.86E-42 |
| C430049B1 | -5.75283 | 8.42E-43 | 2.14E-42 |
| H2-T24    | -2.17387 | 5.29E-43 | 1.35E-42 |
| Odf3b     | -5.05767 | 7.13E-43 | 1.82E-42 |
| Kdelr1    | -0.63206 | 4.28E-43 | 1.09E-42 |
| Gaa       | -1.11997 | 4.20E-43 | 1.07E-42 |
| Rusc2     | -1.10318 | 3.86E-43 | 9.88E-43 |
| Ln timer  | -0.97403 | 3.77E-43 | 9.65E-43 |
| A830082K  | -2.65404 | 4.63E-43 | 1.18E-42 |
| Mcm3      | -2.79688 | 4.05E-43 | 1.04E-42 |
| Gpld1     | -2.09368 | 3.67E-43 | 9.40E-43 |
| Hyl       | -1.9233  | 2.85E-43 | 7.31E-43 |
| Crem      | -1.21426 | 2.64E-43 | 6.77E-43 |
| Slain2    | -0.75515 | 2.23E-43 | 5.72E-43 |
| Cdk2ap1   | -0.96987 | 1.93E-43 | 4.97E-43 |
| Fxyd7     | -2.66049 | 2.39E-43 | 6.13E-43 |
| Gpr179    | -2.46955 | 2.47E-43 | 6.33E-43 |
| Nagpa     | -2.1373  | 2.07E-43 | 5.33E-43 |

|          |          |          |          |
|----------|----------|----------|----------|
| Akr1b10  | -3.17912 | 2.29E-43 | 5.88E-43 |
| Pde4c    | -4.50143 | 2.59E-43 | 6.66E-43 |
| Pgghg    | -3.13074 | 2.00E-43 | 5.13E-43 |
| Mt2      | -1.62803 | 1.72E-43 | 4.44E-43 |
| Phactr2  | -0.66023 | 1.35E-43 | 3.49E-43 |
| Isg20    | -3.48545 | 1.81E-43 | 4.66E-43 |
| Ppp1ca   | -0.50197 | 1.19E-43 | 3.06E-43 |
| Arrdc1   | -1.63551 | 1.38E-43 | 3.55E-43 |
| Arpc4    | -0.74253 | 9.76E-44 | 2.52E-43 |
| Ptbp1    | -0.69141 | 7.77E-44 | 2.01E-43 |
| Mapk12   | -1.19451 | 8.14E-44 | 2.10E-43 |
| Map3k7cl | -5.27059 | 9.35E-44 | 2.41E-43 |
| Ubl3     | -0.42652 | 5.10E-44 | 1.32E-43 |
| Zmat4    | -5.0307  | 8.21E-44 | 2.12E-43 |
| Zhx3     | -0.90786 | 5.00E-44 | 1.29E-43 |
| Il2rg    | -4.64485 | 6.54E-44 | 1.69E-43 |
| Edf1     | -0.44868 | 3.85E-44 | 9.99E-44 |
| Etnppl   | -2.45258 | 5.28E-44 | 1.37E-43 |
| Serinc5  | -1.23501 | 3.73E-44 | 9.67E-44 |
| Maged1   | -0.60081 | 3.52E-44 | 9.13E-44 |
| Ifi27l2a | -4.45897 | 5.06E-44 | 1.31E-43 |
| Ror1     | -3.88525 | 4.61E-44 | 1.19E-43 |
| Lpl      | -3.63768 | 4.42E-44 | 1.15E-43 |
| Zfta     | -1.75793 | 3.54E-44 | 9.20E-44 |
| Trpc4    | -4.29363 | 3.58E-44 | 9.30E-44 |
| Bad      | -0.9314  | 2.26E-44 | 5.89E-44 |
| Bmp3     | -2.59142 | 2.99E-44 | 7.77E-44 |
| Tradd    | -3.25514 | 2.76E-44 | 7.18E-44 |
| Ednrb    | -3.46683 | 2.74E-44 | 7.12E-44 |
| Tgfb1    | -4.91718 | 2.89E-44 | 7.51E-44 |
| 5031439G | -1.06502 | 1.92E-44 | 5.00E-44 |
| Tbc1d16  | -2.70486 | 2.25E-44 | 5.85E-44 |
| Necap2   | -0.98271 | 1.73E-44 | 4.50E-44 |
| Fis1     | -0.45809 | 1.58E-44 | 4.13E-44 |
| H2-Ab1   | -3.38899 | 2.30E-44 | 5.99E-44 |
| Cdk6     | -1.5624  | 1.77E-44 | 4.62E-44 |
| P3h2     | -3.99151 | 1.91E-44 | 4.99E-44 |
| Atp8b2   | -2.50545 | 1.65E-44 | 4.31E-44 |
| Marcks1  | -2.37988 | 1.17E-44 | 3.05E-44 |
| Aida     | -0.84356 | 7.85E-45 | 2.05E-44 |
| Dgkq     | -3.90296 | 1.13E-44 | 2.95E-44 |
| Krcc1    | -0.64465 | 6.28E-45 | 1.64E-44 |
| Irf7     | -0.91361 | 6.24E-45 | 1.63E-44 |
| Lmf2     | -1.42935 | 6.54E-45 | 1.71E-44 |
| Galk1    | -1.125   | 6.06E-45 | 1.59E-44 |
| 2210408F | -3.02681 | 7.69E-45 | 2.01E-44 |
| Adrb2    | -2.25072 | 5.57E-45 | 1.46E-44 |

|          |          |          |          |
|----------|----------|----------|----------|
| Pnpla6   | -1.04657 | 4.36E-45 | 1.14E-44 |
| Pnmal2   | -1.79802 | 4.46E-45 | 1.17E-44 |
| Eif4ebp2 | -0.64935 | 3.30E-45 | 8.65E-45 |
| Stox1    | -4.96385 | 4.08E-45 | 1.07E-44 |
| Tpt1-ps3 | -1.156   | 2.85E-45 | 7.47E-45 |
| Prag1    | -4.67095 | 3.80E-45 | 9.95E-45 |
| Nadk     | -1.13168 | 2.47E-45 | 6.48E-45 |
| Ctbp1    | -0.62478 | 2.22E-45 | 5.84E-45 |
| Cbx5     | -0.57061 | 2.17E-45 | 5.70E-45 |
| Dgcr6    | -0.759   | 2.26E-45 | 5.93E-45 |
| Errfi1   | -1.18162 | 2.33E-45 | 6.11E-45 |
| Alg14    | -1.06957 | 1.90E-45 | 5.01E-45 |
| Fgfr1    | -3.70967 | 2.79E-45 | 7.31E-45 |
| St7      | -3.95733 | 2.44E-45 | 6.40E-45 |
| Gm14207  | -4.85266 | 2.31E-45 | 6.08E-45 |
| Nos1ap   | -3.51096 | 1.93E-45 | 5.07E-45 |
| Cttnbp2  | -1.60191 | 1.49E-45 | 3.92E-45 |
| Dhrs4    | -1.53756 | 1.37E-45 | 3.60E-45 |
| Cables1  | -3.48279 | 1.74E-45 | 4.57E-45 |
| Cplx2    | -2.06406 | 1.43E-45 | 3.78E-45 |
| Mamstr   | -2.80224 | 1.48E-45 | 3.90E-45 |
| Snx17    | -0.75523 | 9.23E-46 | 2.44E-45 |
| Sec61g   | -0.72803 | 8.27E-46 | 2.19E-45 |
| Twist1   | -5.45177 | 1.12E-45 | 2.94E-45 |
| Pcyox1   | -1.1111  | 7.10E-46 | 1.88E-45 |
| Gm44022  | -5.24247 | 1.04E-45 | 2.74E-45 |
| Pkdcc    | -4.00107 | 9.94E-46 | 2.62E-45 |
| Dusp23   | -1.48504 | 6.20E-46 | 1.64E-45 |
| Plcg2    | -5.07634 | 7.64E-46 | 2.02E-45 |
| Apol10b  | -5.39741 | 6.75E-46 | 1.79E-45 |
| Fads1    | -1.34575 | 4.51E-46 | 1.19E-45 |
| Lrrc4c   | -2.50794 | 4.72E-46 | 1.25E-45 |
| Dpagt1   | -1.54714 | 3.96E-46 | 1.05E-45 |
| Mppe1    | -3.9793  | 5.18E-46 | 1.37E-45 |
| Wnt5b    | -5.63478 | 5.64E-46 | 1.49E-45 |
| Gm38066  | -8.09273 | 5.38E-46 | 1.42E-45 |
| Gm43508  | -5.39111 | 4.96E-46 | 1.31E-45 |
| Mid2     | -2.58765 | 3.67E-46 | 9.73E-46 |
| Ufc1     | -0.69663 | 2.61E-46 | 6.93E-46 |
| Eif4a2   | -0.39442 | 2.36E-46 | 6.27E-46 |
| Snx4     | -1.10441 | 2.23E-46 | 5.93E-46 |
| Folh1    | -2.60842 | 2.83E-46 | 7.52E-46 |
| Napepld  | -2.02012 | 2.45E-46 | 6.51E-46 |
| Pdcd4    | -0.67196 | 1.96E-46 | 5.21E-46 |
| Cyria    | -2.95211 | 2.86E-46 | 7.58E-46 |
| Il11ra1  | -1.09996 | 2.00E-46 | 5.32E-46 |
| Msl3l2   | -3.50116 | 2.15E-46 | 5.73E-46 |



|           |          |          |          |
|-----------|----------|----------|----------|
| C1qtnf2   | -6.06216 | 2.23E-46 | 5.94E-46 |
| Pbx2      | -1.036   | 1.33E-46 | 3.56E-46 |
| Tulp3     | -1.69145 | 1.18E-46 | 3.16E-46 |
| Acsf2     | -3.68151 | 1.23E-46 | 3.27E-46 |
| Bcas3     | -1.35652 | 9.41E-47 | 2.51E-46 |
| Qrfpr     | -2.97765 | 1.07E-46 | 2.86E-46 |
| Ppp1r12a  | -0.51909 | 6.62E-47 | 1.77E-46 |
| Ctsw      | -4.69166 | 1.14E-46 | 3.04E-46 |
| Zfp771    | -0.94588 | 6.68E-47 | 1.79E-46 |
| Nr1d1     | -0.65689 | 6.33E-47 | 1.70E-46 |
| Notch2    | -1.78955 | 7.39E-47 | 1.98E-46 |
| G3bp1     | -0.60293 | 3.54E-47 | 9.51E-47 |
| Gpc4      | -3.78624 | 5.30E-47 | 1.42E-46 |
| Rrad      | -4.29141 | 5.56E-47 | 1.49E-46 |
| Mtmr12    | -1.64035 | 2.82E-47 | 7.57E-47 |
| Lix1l     | -1.03948 | 2.54E-47 | 6.82E-47 |
| Axin2     | -0.9618  | 2.16E-47 | 5.81E-47 |
| Hmx1      | -2.34488 | 2.77E-47 | 7.43E-47 |
| Nrxn3     | -1.59404 | 2.29E-47 | 6.16E-47 |
| Ap1s2     | -0.79521 | 1.81E-47 | 4.87E-47 |
| Kcnq1     | -5.61985 | 2.89E-47 | 7.76E-47 |
| Ebf2      | -3.71859 | 2.52E-47 | 6.77E-47 |
| Sting1    | -4.83866 | 2.20E-47 | 5.93E-47 |
| Samd5     | -3.53155 | 1.98E-47 | 5.32E-47 |
| Ltc4s     | -4.67408 | 1.57E-47 | 4.24E-47 |
| E230020D  | -6.14393 | 1.09E-47 | 2.94E-47 |
| Me3       | -3.00591 | 8.71E-48 | 2.36E-47 |
| Grb2      | -0.73119 | 6.08E-48 | 1.65E-47 |
| Ccm2      | -1.5359  | 6.62E-48 | 1.79E-47 |
| Tmem45a   | -5.72521 | 9.89E-48 | 2.67E-47 |
| Rgs10     | -4.75577 | 9.29E-48 | 2.51E-47 |
| Arhgef2   | -0.6571  | 5.20E-48 | 1.41E-47 |
| Ifi203-ps | -6.18134 | 9.15E-48 | 2.47E-47 |
| Ctsa      | -0.90981 | 4.45E-48 | 1.21E-47 |
| Ctla2b    | -7.16358 | 7.48E-48 | 2.02E-47 |
| Sspn      | -5.13285 | 6.30E-48 | 1.71E-47 |
| Htatip2   | -4.73755 | 5.40E-48 | 1.46E-47 |
| Sorcs1    | -2.04293 | 4.61E-48 | 1.25E-47 |
| Emilin1   | -4.14057 | 3.56E-48 | 9.67E-48 |
| Gramd4    | -3.24541 | 3.17E-48 | 8.62E-48 |
| Tbx18     | -7.02469 | 3.79E-48 | 1.03E-47 |
| Ifi30     | -1.50516 | 2.54E-48 | 6.92E-48 |
| Hs3st1    | -4.91398 | 3.41E-48 | 9.27E-48 |
| Glis2     | -1.53957 | 1.64E-48 | 4.47E-48 |
| Mtpn      | -0.58164 | 1.28E-48 | 3.50E-48 |
| Pdia6     | -0.67897 | 1.28E-48 | 3.50E-48 |
| Gm37728   | -4.43959 | 1.94E-48 | 5.30E-48 |

|          |          |          |          |
|----------|----------|----------|----------|
| Col27a1  | -3.28058 | 1.39E-48 | 3.78E-48 |
| Bend5    | -2.37132 | 1.10E-48 | 3.01E-48 |
| Slc25a45 | -5.22455 | 1.39E-48 | 3.80E-48 |
| Pank1    | -2.82928 | 1.16E-48 | 3.16E-48 |
| Cmtm3    | -4.18895 | 1.15E-48 | 3.14E-48 |
| Pde4a    | -2.82568 | 9.14E-49 | 2.50E-48 |
| Xlr      | -5.07112 | 9.25E-49 | 2.53E-48 |
| 5330406M | -3.78499 | 8.06E-49 | 2.21E-48 |
| Begain   | -2.26048 | 5.47E-49 | 1.50E-48 |
| Actr2    | -0.60561 | 3.58E-49 | 9.86E-49 |
| Irf2     | -0.64396 | 3.46E-49 | 9.54E-49 |
| Fam111a  | -5.27959 | 6.01E-49 | 1.65E-48 |
| B3gnt2   | -7.24699 | 6.44E-49 | 1.77E-48 |
| Mtmr11   | -2.59518 | 4.24E-49 | 1.17E-48 |
| Tmem131  | -0.84369 | 3.18E-49 | 8.76E-49 |
| Zfpm1    | -1.136   | 3.18E-49 | 8.77E-49 |
| Tnip1    | -1.37423 | 3.56E-49 | 9.79E-49 |
| Slc24a3  | -2.58243 | 3.85E-49 | 1.06E-48 |
| Foxd1    | -4.36715 | 4.12E-49 | 1.13E-48 |
| Cdk2     | -2.78044 | 3.17E-49 | 8.75E-49 |
| Erp44    | -1.02321 | 2.34E-49 | 6.45E-49 |
| Hdac1    | -0.76249 | 2.11E-49 | 5.83E-49 |
| Zhx2     | -2.69764 | 3.02E-49 | 8.33E-49 |
| Exoc2    | -1.06537 | 2.22E-49 | 6.14E-49 |
| Chrdl1   | -2.45857 | 3.03E-49 | 8.37E-49 |
| Sestd1   | -1.88762 | 2.30E-49 | 6.36E-49 |
| Cacng4   | -2.03144 | 2.53E-49 | 6.99E-49 |
| Nck1     | -0.70306 | 1.76E-49 | 4.86E-49 |
| Hopx     | -1.24396 | 1.91E-49 | 5.29E-49 |
| Ampd3    | -4.26201 | 2.38E-49 | 6.58E-49 |
| Jam3     | -1.30842 | 1.47E-49 | 4.07E-49 |
| Arf1     | -0.43967 | 1.26E-49 | 3.50E-49 |
| Atp2a2   | -0.53051 | 1.31E-49 | 3.64E-49 |
| Erbin    | -0.6452  | 1.23E-49 | 3.42E-49 |
| Six5     | -3.9589  | 1.70E-49 | 4.71E-49 |
| Rassf1   | -0.74636 | 9.67E-50 | 2.68E-49 |
| Glb1     | -3.96413 | 1.57E-49 | 4.33E-49 |
| Il3ra    | -2.89936 | 1.49E-49 | 4.14E-49 |
| Cdc42ep2 | -1.504   | 8.93E-50 | 2.48E-49 |
| Ptk2     | -0.7366  | 7.51E-50 | 2.09E-49 |
| Tbc1d8b  | -3.22399 | 5.55E-50 | 1.54E-49 |
| Trp53i11 | -3.90136 | 4.20E-50 | 1.17E-49 |
| Med28    | -0.63186 | 2.35E-50 | 6.54E-50 |
| Magix    | -7.14803 | 3.79E-50 | 1.05E-49 |
| Sned1    | -2.59651 | 2.55E-50 | 7.10E-50 |
| Hrc      | -5.12714 | 3.22E-50 | 8.97E-50 |
| Isoc1    | -0.97816 | 1.82E-50 | 5.07E-50 |

|           |          |          |          |
|-----------|----------|----------|----------|
| Dzip1l    | -4.86574 | 2.05E-50 | 5.72E-50 |
| Fblim1    | -4.39831 | 1.56E-50 | 4.37E-50 |
| Spats2l   | -4.32567 | 1.57E-50 | 4.38E-50 |
| Pdlim4    | -2.12765 | 1.16E-50 | 3.25E-50 |
| Ephb1     | -2.20232 | 1.05E-50 | 2.95E-50 |
| Mfsd10    | -1.46257 | 8.30E-51 | 2.33E-50 |
| 9530082P  | -1.4872  | 8.31E-51 | 2.33E-50 |
| 1500009L1 | -3.99277 | 1.22E-50 | 3.41E-50 |
| Cep112    | -2.10056 | 7.89E-51 | 2.21E-50 |
| Ptpn11    | -0.67409 | 5.14E-51 | 1.44E-50 |
| Epn2      | -0.61338 | 4.67E-51 | 1.31E-50 |
| Dio2      | -2.67817 | 7.26E-51 | 2.04E-50 |
| Shb       | -4.70435 | 6.42E-51 | 1.80E-50 |
| Shisa9    | -2.86478 | 4.79E-51 | 1.35E-50 |
| Smyd2     | -2.09093 | 3.44E-51 | 9.69E-51 |
| Cul7      | -2.2621  | 2.92E-51 | 8.22E-51 |
| Gm9889    | -4.83915 | 3.70E-51 | 1.04E-50 |
| Trim21    | -4.64821 | 3.52E-51 | 9.91E-51 |
| Hspa2     | -1.22583 | 2.03E-51 | 5.73E-51 |
| Tcf3      | -1.06417 | 1.79E-51 | 5.05E-51 |
| Samhd1    | -0.79478 | 1.46E-51 | 4.13E-51 |
| Trnp1     | -1.52817 | 1.82E-51 | 5.14E-51 |
| Klhl13    | -3.1467  | 2.15E-51 | 6.05E-51 |
| Scarf2    | -3.59034 | 2.05E-51 | 5.77E-51 |
| Lrrk2     | -2.70444 | 1.89E-51 | 5.33E-51 |
| Gas2l1    | -1.47106 | 1.09E-51 | 3.07E-51 |
| Ndufa13   | -0.42512 | 8.36E-52 | 2.37E-51 |
| Gm15270   | -3.66675 | 1.41E-51 | 3.98E-51 |
| Gm9917    | -2.08001 | 8.00E-52 | 2.27E-51 |
| Bahcc1    | -2.55453 | 8.08E-52 | 2.29E-51 |
| Rap2b     | -1.78398 | 7.26E-52 | 2.06E-51 |
| Atraid    | -0.62643 | 5.55E-52 | 1.58E-51 |
| 1700025G  | -2.06115 | 6.56E-52 | 1.86E-51 |
| Manea     | -1.89583 | 5.93E-52 | 1.68E-51 |
| Stc1      | -4.71892 | 8.29E-52 | 2.35E-51 |
| Tfeb      | -1.76703 | 5.66E-52 | 1.61E-51 |
| Ppp1r1a   | -1.5265  | 5.78E-52 | 1.64E-51 |
| Gm26802   | -4.81966 | 8.19E-52 | 2.32E-51 |
| Rnf217    | -2.58592 | 6.59E-52 | 1.87E-51 |
| Zmpste24  | -0.97425 | 3.91E-52 | 1.11E-51 |
| Rab11b    | -0.58858 | 3.57E-52 | 1.02E-51 |
| Bckdha    | -1.35803 | 4.06E-52 | 1.15E-51 |
| Rnf144a   | -2.0642  | 3.85E-52 | 1.10E-51 |
| Agpat2    | -3.61465 | 4.68E-52 | 1.33E-51 |
| Myof      | -1.95509 | 3.32E-52 | 9.47E-52 |
| Plk3      | -4.80509 | 4.19E-52 | 1.19E-51 |
| Rnf38     | -1.08653 | 2.48E-52 | 7.07E-52 |

|          |          |          |          |
|----------|----------|----------|----------|
| Fzd8     | -4.23854 | 3.98E-52 | 1.13E-51 |
| Ankrd37  | -0.90002 | 2.07E-52 | 5.93E-52 |
| Lancl3   | -5.37855 | 3.53E-52 | 1.01E-51 |
| Nbeal2   | -2.78477 | 2.84E-52 | 8.10E-52 |
| Ehd1     | -1.15725 | 2.01E-52 | 5.74E-52 |
| Efh1     | -2.15942 | 2.55E-52 | 7.29E-52 |
| Trim25   | -0.98882 | 1.84E-52 | 5.27E-52 |
| Gm12216  | -4.2792  | 2.77E-52 | 7.89E-52 |
| Paqr8    | -4.50019 | 2.61E-52 | 7.44E-52 |
| Irak3    | -4.30845 | 2.40E-52 | 6.85E-52 |
| Slc38a10 | -1.29261 | 1.41E-52 | 4.03E-52 |
| Pgrmc1   | -0.59386 | 1.15E-52 | 3.29E-52 |
| lqsec2   | -3.61782 | 1.90E-52 | 5.44E-52 |
| Nras     | -0.79148 | 1.06E-52 | 3.05E-52 |
| Mob3b    | -3.08747 | 1.76E-52 | 5.02E-52 |
| Sos2     | -0.84583 | 1.07E-52 | 3.07E-52 |
| Rnf19b   | -3.46357 | 1.57E-52 | 4.48E-52 |
| Crnde    | -3.95827 | 1.71E-52 | 4.89E-52 |
| Bag1     | -0.64166 | 6.37E-53 | 1.83E-52 |
| Tmem245  | -0.66193 | 5.87E-53 | 1.69E-52 |
| Rnf187   | -0.58634 | 4.93E-53 | 1.42E-52 |
| Cadps    | -1.98121 | 7.05E-53 | 2.03E-52 |
| Slc7a2   | -2.36686 | 6.47E-53 | 1.86E-52 |
| Selenow  | -0.37942 | 3.79E-53 | 1.09E-52 |
| Fzd3     | -1.60767 | 4.81E-53 | 1.38E-52 |
| Pik3c2b  | -4.26124 | 5.82E-53 | 1.68E-52 |
| Grk5     | -1.39253 | 2.89E-53 | 8.34E-53 |
| Myl4     | -4.72306 | 4.32E-53 | 1.25E-52 |
| Mpc1     | -0.63441 | 2.23E-53 | 6.46E-53 |
| Pik3c2a  | -0.69804 | 2.23E-53 | 6.44E-53 |
| Slc7a7   | -5.16836 | 4.48E-53 | 1.29E-52 |
| Kremen1  | -1.51273 | 2.58E-53 | 7.45E-53 |
| Stxbp6   | -3.71558 | 3.19E-53 | 9.20E-53 |
| Rgs19    | -4.28416 | 2.90E-53 | 8.37E-53 |
| Arhgap1  | -1.20543 | 1.57E-53 | 4.56E-53 |
| Pcnx     | -0.70037 | 1.41E-53 | 4.09E-53 |
| Ldlrad4  | -2.18987 | 1.76E-53 | 5.08E-53 |
| Zic4     | -4.3823  | 2.30E-53 | 6.67E-53 |
| Polr2m   | -0.61949 | 1.05E-53 | 3.04E-53 |
| Rbbp7    | -0.66451 | 9.58E-54 | 2.78E-53 |
| Dnah8    | -5.11154 | 1.65E-53 | 4.77E-53 |
| Tmem71   | -4.49673 | 1.55E-53 | 4.50E-53 |
| Rpl22l1  | -0.46386 | 7.13E-54 | 2.07E-53 |
| Pacsin3  | -2.04821 | 1.03E-53 | 2.98E-53 |
| Tlnrd1   | -1.19069 | 7.55E-54 | 2.20E-53 |
| Frzb     | -2.03583 | 6.39E-54 | 1.86E-53 |
| Cflar    | -0.73108 | 3.59E-54 | 1.05E-53 |

|           |          |          |          |
|-----------|----------|----------|----------|
| Pgf       | -4.6115  | 7.13E-54 | 2.07E-53 |
| Gm26632   | -5.9407  | 4.18E-54 | 1.22E-53 |
| Tom1l2    | -0.88292 | 2.22E-54 | 6.50E-54 |
| C1s1      | -4.87241 | 3.89E-54 | 1.14E-53 |
| Gm44639   | -5.69584 | 4.13E-54 | 1.20E-53 |
| Plp2      | -4.3044  | 3.37E-54 | 9.84E-54 |
| Rala      | -0.65951 | 1.81E-54 | 5.30E-54 |
| Rexo2     | -0.68245 | 1.62E-54 | 4.75E-54 |
| Elk4      | -0.82668 | 1.50E-54 | 4.40E-54 |
| Mrc2      | -4.89154 | 2.60E-54 | 7.60E-54 |
| Gm17501   | -5.24656 | 2.57E-54 | 7.51E-54 |
| Prrc2b    | -0.53688 | 1.15E-54 | 3.39E-54 |
| Tubb6     | -6.02095 | 2.50E-54 | 7.32E-54 |
| Tmem205   | -0.97984 | 1.08E-54 | 3.18E-54 |
| Cygb      | -0.95174 | 1.07E-54 | 3.16E-54 |
| Adcyap1r1 | -4.81179 | 1.68E-54 | 4.91E-54 |
| Fam241a   | -1.39537 | 8.44E-55 | 2.48E-54 |
| Islr      | -5.20011 | 1.45E-54 | 4.25E-54 |
| Cd83      | -5.49694 | 1.23E-54 | 3.62E-54 |
| Bcl7c     | -1.01415 | 5.01E-55 | 1.47E-54 |
| Trpv4     | -4.32142 | 7.61E-55 | 2.24E-54 |
| Specc1l   | -0.7755  | 2.44E-55 | 7.20E-55 |
| Ripor2    | -4.29136 | 4.44E-55 | 1.31E-54 |
| Polk      | -0.80388 | 2.35E-55 | 6.94E-55 |
| Cenpv     | -2.16871 | 3.31E-55 | 9.75E-55 |
| Mgat3     | -3.86119 | 3.36E-55 | 9.90E-55 |
| Gm37606   | -4.56574 | 3.20E-55 | 9.43E-55 |
| Flt3l     | -2.68599 | 2.40E-55 | 7.10E-55 |
| Rps6ka3   | -0.81844 | 1.62E-55 | 4.80E-55 |
| Fbxo32    | -2.09747 | 1.94E-55 | 5.73E-55 |
| Asah1     | -0.96481 | 1.22E-55 | 3.60E-55 |
| Nudt7     | -2.43076 | 1.68E-55 | 4.98E-55 |
| Prkar1b   | -2.91393 | 1.63E-55 | 4.82E-55 |
| Slc8b1    | -3.40095 | 1.79E-55 | 5.30E-55 |
| Npr2      | -3.10009 | 1.60E-55 | 4.73E-55 |
| Soga1     | -4.25164 | 1.42E-55 | 4.22E-55 |
| Gm47664   | -5.4396  | 1.59E-55 | 4.70E-55 |
| Smdt1     | -0.44533 | 6.55E-56 | 1.95E-55 |
| B3glct    | -2.25304 | 8.74E-56 | 2.59E-55 |
| Ttyh3     | -1.7685  | 7.16E-56 | 2.13E-55 |
| Htr1b     | -4.86586 | 9.24E-56 | 2.74E-55 |
| Psat1     | -1.65472 | 5.87E-56 | 1.74E-55 |
| Pip5k1c   | -0.95542 | 3.81E-56 | 1.13E-55 |
| Col8a1    | -4.4462  | 6.86E-56 | 2.04E-55 |
| Hecw2     | -4.88408 | 5.86E-56 | 1.74E-55 |
| Ppp1r12c  | -0.81574 | 2.75E-56 | 8.20E-56 |
| Six6      | -1.38166 | 3.73E-56 | 1.11E-55 |

|         |          |          |          |
|---------|----------|----------|----------|
| Npr1    | -3.31313 | 4.40E-56 | 1.31E-55 |
| Abca8b  | -2.19279 | 2.71E-56 | 8.10E-56 |
| Sos1    | -0.84885 | 1.66E-56 | 4.97E-56 |
| Fam217b | -3.43921 | 2.47E-56 | 7.35E-56 |
| Sinhcaf | -2.4499  | 2.02E-56 | 6.02E-56 |
| Dhcr24  | -2.25023 | 1.88E-56 | 5.61E-56 |
| Gm42449 | -6.11907 | 2.25E-56 | 6.73E-56 |
| Rab6a   | -0.59975 | 9.05E-57 | 2.71E-56 |
| Lrpap1  | -0.75572 | 5.11E-57 | 1.54E-56 |
| Gm45457 | -1.94308 | 5.96E-57 | 1.79E-56 |
| Prkx    | -1.30529 | 4.31E-57 | 1.30E-56 |
| Rtl8b   | -1.10099 | 3.57E-57 | 1.07E-56 |
| Ptpre   | -4.58191 | 5.59E-57 | 1.68E-56 |
| Ccdc184 | -4.63832 | 5.27E-57 | 1.58E-56 |
| Zfp820  | -5.97029 | 4.24E-57 | 1.28E-56 |
| Cdh2    | -0.83735 | 2.02E-57 | 6.08E-57 |
| Diras2  | -1.87259 | 2.45E-57 | 7.39E-57 |
| Lyl1    | -4.9488  | 3.45E-57 | 1.04E-56 |
| Igfbp5  | -3.49096 | 3.01E-57 | 9.06E-57 |
| Cys1    | -2.6512  | 2.38E-57 | 7.17E-57 |
| Akr1c14 | -5.86498 | 2.53E-57 | 7.62E-57 |
| Gm45223 | -1.3674  | 1.03E-57 | 3.11E-57 |
| Arpp19  | -0.57142 | 6.79E-58 | 2.05E-57 |
| Prkcd   | -3.46277 | 1.31E-57 | 3.96E-57 |
| Crebbp  | -0.58605 | 6.39E-58 | 1.93E-57 |
| Sfr1    | -0.55927 | 5.67E-58 | 1.72E-57 |
| Stard9  | -1.25343 | 6.76E-58 | 2.05E-57 |
| Utp14b  | -1.13977 | 5.59E-58 | 1.69E-57 |
| Cntfr   | -2.14404 | 6.88E-58 | 2.08E-57 |
| Rgs6    | -1.70373 | 6.05E-58 | 1.83E-57 |
| Cacna1c | -4.98969 | 9.36E-58 | 2.83E-57 |
| Gm42684 | -8.11811 | 9.36E-58 | 2.83E-57 |
| Nectin2 | -1.62725 | 4.02E-58 | 1.22E-57 |
| Pygb    | -1.40581 | 4.19E-58 | 1.27E-57 |
| Egr3    | -5.43866 | 4.79E-58 | 1.45E-57 |
| Jam2    | -0.57428 | 1.98E-58 | 6.02E-58 |
| Nid2    | -5.05793 | 3.94E-58 | 1.19E-57 |
| Gkn3    | -4.31603 | 3.99E-58 | 1.21E-57 |
| Mnd1    | -4.43693 | 3.51E-58 | 1.06E-57 |
| Micu2   | -1.29891 | 1.80E-58 | 5.46E-58 |
| Syf2    | -0.58089 | 1.45E-58 | 4.40E-58 |
| Cd274   | -3.73245 | 2.71E-58 | 8.22E-58 |
| Tmem134 | -0.82005 | 1.32E-58 | 4.02E-58 |
| Bcap31  | -0.6816  | 1.26E-58 | 3.83E-58 |
| Txnrd3  | -2.9688  | 2.21E-58 | 6.70E-58 |
| Aldh1a1 | -1.85688 | 1.66E-58 | 5.05E-58 |
| Scarb2  | -0.93484 | 1.01E-58 | 3.08E-58 |

|          |          |          |          |
|----------|----------|----------|----------|
| Arhgap17 | -0.86437 | 8.59E-59 | 2.62E-58 |
| Fam20a   | -4.95109 | 1.67E-58 | 5.07E-58 |
| Cyp2j6   | -2.93524 | 1.28E-58 | 3.90E-58 |
| Mras     | -1.44437 | 9.19E-59 | 2.80E-58 |
| Folr1    | -3.06562 | 1.24E-58 | 3.76E-58 |
| Gvin2    | -6.64792 | 1.09E-58 | 3.31E-58 |
| 4930556N | -4.45623 | 8.51E-59 | 2.60E-58 |
| Mettl7a1 | -1.94601 | 4.30E-59 | 1.31E-58 |
| Tspan18  | -3.95805 | 6.08E-59 | 1.86E-58 |
| Pkia     | -1.56471 | 3.64E-59 | 1.11E-58 |
| Zfp275   | -2.89387 | 4.67E-59 | 1.43E-58 |
| Dtna     | -2.16821 | 3.93E-59 | 1.20E-58 |
| Anpep    | -6.17355 | 5.33E-59 | 1.63E-58 |
| Mideas   | -1.84123 | 2.12E-59 | 6.49E-59 |
| Dhrs1    | -1.29629 | 1.61E-59 | 4.93E-59 |
| Steap4   | -4.64051 | 2.37E-59 | 7.27E-59 |
| Rnaset2a | -1.23446 | 1.25E-59 | 3.84E-59 |
| Sulf1    | -2.17544 | 1.73E-59 | 5.31E-59 |
| Gprc5b   | -2.65976 | 1.67E-59 | 5.11E-59 |
| Il17rc   | -3.97382 | 1.82E-59 | 5.58E-59 |
| Fat1     | -2.82428 | 1.49E-59 | 4.58E-59 |
| Shc1     | -1.56835 | 9.62E-60 | 2.96E-59 |
| Ilk      | -0.882   | 7.22E-60 | 2.22E-59 |
| Slc35d2  | -5.12233 | 1.50E-59 | 4.60E-59 |
| Gm42992  | -4.05797 | 1.14E-59 | 3.50E-59 |
| Tor1aip1 | -0.66751 | 4.72E-60 | 1.46E-59 |
| 2200002D | -3.28562 | 7.55E-60 | 2.33E-59 |
| Upp2     | -2.4003  | 6.46E-60 | 1.99E-59 |
| mt-Co2   | -1.14047 | 4.59E-60 | 1.42E-59 |
| Mbd3     | -0.79848 | 3.67E-60 | 1.14E-59 |
| Tshz1    | -0.87647 | 3.63E-60 | 1.12E-59 |
| Jdp2     | -3.14306 | 5.84E-60 | 1.80E-59 |
| Sox8     | -2.98767 | 6.09E-60 | 1.88E-59 |
| Map2k3   | -1.31077 | 3.24E-60 | 1.00E-59 |
| 1700018A | -7.17627 | 6.28E-60 | 1.94E-59 |
| Kcne4    | -4.99731 | 5.40E-60 | 1.67E-59 |
| Snn      | -1.52453 | 2.82E-60 | 8.74E-60 |
| Gm12866  | -4.52307 | 4.65E-60 | 1.44E-59 |
| Adap2os  | -5.82995 | 4.47E-60 | 1.38E-59 |
| Tmed10   | -0.48515 | 1.39E-60 | 4.31E-60 |
| Srebf2   | -0.95491 | 1.51E-60 | 4.70E-60 |
| Specc1   | -1.63321 | 1.70E-60 | 5.28E-60 |
| Prickle3 | -4.24133 | 2.75E-60 | 8.53E-60 |
| Gm9946   | -6.93859 | 2.07E-60 | 6.44E-60 |
| Gm48996  | -4.89147 | 1.16E-60 | 3.62E-60 |
| Arsa     | -3.18408 | 6.44E-61 | 2.01E-60 |
| Tspan15  | -1.85319 | 5.54E-61 | 1.73E-60 |

|          |          |          |          |
|----------|----------|----------|----------|
| Plxna1   | -3.99913 | 7.94E-61 | 2.47E-60 |
| Tgif1    | -4.2765  | 7.46E-61 | 2.33E-60 |
| Htra1    | -1.11471 | 3.78E-61 | 1.18E-60 |
| Ankrd6   | -2.61221 | 5.11E-61 | 1.60E-60 |
| Nrbp2    | -2.54885 | 4.58E-61 | 1.43E-60 |
| Cmtm7    | -3.49216 | 3.47E-61 | 1.09E-60 |
| Mta3     | -3.67771 | 2.83E-61 | 8.87E-61 |
| Hmg20b   | -0.75618 | 1.22E-61 | 3.85E-61 |
| Prelid2  | -4.31251 | 2.70E-61 | 8.46E-61 |
| Arhgap25 | -6.59123 | 3.13E-61 | 9.79E-61 |
| Gpr137b  | -3.75218 | 2.77E-61 | 8.67E-61 |
| Cert1    | -0.58335 | 1.14E-61 | 3.57E-61 |
| Slc22a15 | -3.82038 | 1.79E-61 | 5.61E-61 |
| Fhl1     | -2.03214 | 1.26E-61 | 3.95E-61 |
| Erbp2    | -4.57693 | 1.92E-61 | 6.02E-61 |
| Tmem50a  | -0.51874 | 6.81E-62 | 2.15E-61 |
| Msx1     | -6.06117 | 1.27E-61 | 4.00E-61 |
| Dapk1    | -2.81203 | 9.26E-62 | 2.92E-61 |
| Ston1    | -4.24242 | 1.01E-61 | 3.16E-61 |
| Hdlbp    | -0.70426 | 4.43E-62 | 1.40E-61 |
| Serpini1 | -1.51317 | 6.26E-62 | 1.98E-61 |
| Lims1    | -0.69068 | 4.20E-62 | 1.33E-61 |
| Srpr     | -0.67912 | 3.82E-62 | 1.21E-61 |
| Rrh      | -2.32977 | 7.28E-62 | 2.30E-61 |
| Prdx2    | -0.50856 | 3.47E-62 | 1.10E-61 |
| Kcnmb1   | -5.27226 | 8.30E-62 | 2.62E-61 |
| Kctd17   | -1.58591 | 3.91E-62 | 1.24E-61 |
| Mrpl52   | -0.67261 | 2.86E-62 | 9.07E-62 |
| Col1a2   | -4.90741 | 6.99E-62 | 2.20E-61 |
| Nck2     | -4.12192 | 5.88E-62 | 1.86E-61 |
| Ndst3    | -4.84482 | 4.47E-62 | 1.41E-61 |
| Pxmp4    | -1.94095 | 2.18E-62 | 6.92E-62 |
| Fuca1    | -1.02066 | 1.55E-62 | 4.91E-62 |
| Adamts9  | -4.94402 | 3.00E-62 | 9.50E-62 |
| Cyp20a1  | -1.70522 | 1.57E-62 | 5.00E-62 |
| Pde1c    | -2.36184 | 2.07E-62 | 6.57E-62 |
| mt-Nd6   | -1.03107 | 1.17E-62 | 3.71E-62 |
| Gm49266  | -6.49166 | 1.78E-62 | 5.66E-62 |
| Kcnk1    | -2.6741  | 1.19E-62 | 3.78E-62 |
| Cysltr2  | -5.34075 | 1.46E-62 | 4.64E-62 |
| Adamts5  | -2.20559 | 9.49E-63 | 3.02E-62 |
| Plekhh2  | -1.59241 | 6.77E-63 | 2.16E-62 |
| Lmo4     | -1.03111 | 5.23E-63 | 1.67E-62 |
| Olfml2a  | -4.29844 | 9.77E-63 | 3.11E-62 |
| Col9a1   | -2.37229 | 6.54E-63 | 2.08E-62 |
| Sbds     | -0.70409 | 3.20E-63 | 1.02E-62 |
| Manba    | -4.45024 | 5.97E-63 | 1.90E-62 |



|          |          |          |          |
|----------|----------|----------|----------|
| Tmem37   | -5.04933 | 5.92E-63 | 1.89E-62 |
| Tcirg1   | -2.61633 | 3.11E-63 | 9.94E-63 |
| Rftn2    | -2.61166 | 2.90E-63 | 9.27E-63 |
| Ppfibp2  | -5.01672 | 3.99E-63 | 1.28E-62 |
| Nek7     | -0.70101 | 1.51E-63 | 4.83E-63 |
| Pcdh9    | -2.40558 | 2.29E-63 | 7.34E-63 |
| Abca9    | -6.38264 | 3.16E-63 | 1.01E-62 |
| Kcnj2    | -5.68588 | 2.68E-63 | 8.60E-63 |
| Mpst     | -2.5315  | 1.30E-63 | 4.18E-63 |
| Ano10    | -2.40932 | 1.21E-63 | 3.87E-63 |
| Snx7     | -4.99654 | 1.54E-63 | 4.95E-63 |
| Lamb1    | -4.38723 | 1.32E-63 | 4.24E-63 |
| Map4k2   | -1.00759 | 5.89E-64 | 1.89E-63 |
| Fam174a  | -0.82879 | 4.76E-64 | 1.53E-63 |
| Wdr1     | -0.8386  | 4.29E-64 | 1.38E-63 |
| Gpr153   | -2.58689 | 4.30E-64 | 1.38E-63 |
| Trpm4    | -3.20779 | 3.35E-64 | 1.08E-63 |
| Rpl24    | -0.5243  | 1.27E-64 | 4.12E-64 |
| Slitrk2  | -2.56467 | 2.79E-64 | 9.00E-64 |
| Slc6a1   | -2.01492 | 2.14E-64 | 6.92E-64 |
| Arpc1a   | -0.75808 | 1.16E-64 | 3.75E-64 |
| Sh3pxd2b | -2.78727 | 2.03E-64 | 6.55E-64 |
| Gm37390  | -6.63255 | 2.68E-64 | 8.66E-64 |
| Atp11c   | -1.23486 | 1.03E-64 | 3.34E-64 |
| Cntnap2  | -2.15852 | 1.49E-64 | 4.82E-64 |
| Dab1     | -1.89109 | 1.19E-64 | 3.84E-64 |
| F2r      | -4.53704 | 1.72E-64 | 5.56E-64 |
| Acot2    | -2.44133 | 7.10E-65 | 2.30E-64 |
| Gm1673   | -1.65751 | 6.81E-65 | 2.21E-64 |
| Tbca     | -0.61125 | 4.06E-65 | 1.32E-64 |
| Ehd3     | -1.34988 | 5.08E-65 | 1.65E-64 |
| Srp14    | -0.53998 | 2.57E-65 | 8.37E-65 |
| Akip1    | -2.29274 | 4.83E-65 | 1.57E-64 |
| Rab3d    | -2.45618 | 4.25E-65 | 1.38E-64 |
| Med21    | -0.86968 | 2.34E-65 | 7.62E-65 |
| Ccdc80   | -5.32992 | 6.34E-65 | 2.06E-64 |
| Reep1    | -3.84048 | 4.50E-65 | 1.46E-64 |
| Dnajb9   | -1.02257 | 1.75E-65 | 5.69E-65 |
| Ost4     | -0.56905 | 1.38E-65 | 4.52E-65 |
| Pld2     | -3.40662 | 3.03E-65 | 9.85E-65 |
| Grk2     | -1.10309 | 1.23E-65 | 4.02E-65 |
| Tmx3     | -0.86007 | 8.63E-66 | 2.83E-65 |
| Map3k5   | -2.15359 | 1.45E-65 | 4.74E-65 |
| H6pd     | -4.68112 | 2.29E-65 | 7.47E-65 |
| Ppp2r2a  | -0.86518 | 7.97E-66 | 2.61E-65 |
| Angptl2  | -4.6722  | 1.66E-65 | 5.42E-65 |
| Rit1     | -1.26139 | 6.67E-66 | 2.19E-65 |

|           |          |          |          |
|-----------|----------|----------|----------|
| Ltbp3     | -2.69973 | 1.01E-65 | 3.30E-65 |
| Oaf       | -3.38249 | 1.17E-65 | 3.82E-65 |
| Asb4      | -5.14462 | 1.26E-65 | 4.13E-65 |
| H2aj      | -0.77561 | 4.37E-66 | 1.44E-65 |
| Scn1b     | -3.27229 | 7.73E-66 | 2.53E-65 |
| Hexb      | -2.04377 | 9.21E-66 | 3.01E-65 |
| Stx1a     | -4.05856 | 8.53E-66 | 2.79E-65 |
| Nr2f6     | -1.32596 | 4.04E-66 | 1.33E-65 |
| Gm30571   | -6.58576 | 9.06E-66 | 2.96E-65 |
| Cxcl16    | -2.21099 | 4.98E-66 | 1.63E-65 |
| Pdlim3    | -2.14162 | 4.17E-66 | 1.37E-65 |
| Capn1     | -4.92596 | 6.17E-66 | 2.02E-65 |
| Olfr558   | -5.18584 | 6.31E-66 | 2.07E-65 |
| Bach1     | -1.1101  | 2.44E-66 | 8.05E-66 |
| Tagln     | -3.66399 | 3.78E-66 | 1.24E-65 |
| Ism1      | -5.59647 | 3.70E-66 | 1.22E-65 |
| Pttg1     | -0.78452 | 1.25E-66 | 4.14E-66 |
| Pard6g    | -3.09483 | 2.32E-66 | 7.65E-66 |
| Gm14964   | -4.59484 | 2.10E-66 | 6.93E-66 |
| Tox2      | -1.92465 | 1.25E-66 | 4.13E-66 |
| Rpl36al   | -0.76984 | 5.25E-67 | 1.74E-66 |
| Kcna5     | -3.46864 | 1.07E-66 | 3.54E-66 |
| Rpl14-ps1 | -0.72692 | 4.83E-67 | 1.60E-66 |
| Sorl1     | -1.64459 | 7.03E-67 | 2.32E-66 |
| Eef2k     | -2.51215 | 5.37E-67 | 1.78E-66 |
| Minar2    | -1.47427 | 4.23E-67 | 1.40E-66 |
| Bicc1     | -4.24166 | 6.54E-67 | 2.16E-66 |
| Prorp     | -2.96465 | 3.76E-67 | 1.25E-66 |
| Ddx54     | -1.25318 | 2.14E-67 | 7.10E-67 |
| Dipk2b    | -7.08133 | 5.43E-67 | 1.80E-66 |
| Enho      | -1.30655 | 2.28E-67 | 7.58E-67 |
| Plekhh3   | -1.65427 | 2.47E-67 | 8.19E-67 |
| Denn2b    | -1.4445  | 1.70E-67 | 5.66E-67 |
| Rap1a     | -0.63472 | 1.26E-67 | 4.21E-67 |
| Pde1a     | -4.54075 | 3.17E-67 | 1.05E-66 |
| Ccdc152   | -4.90751 | 3.05E-67 | 1.01E-66 |
| Cd320     | -1.02218 | 9.35E-68 | 3.12E-67 |
| Csnk1g2   | -0.85882 | 8.37E-68 | 2.79E-67 |
| Hip1r     | -1.27026 | 1.02E-67 | 3.41E-67 |
| B4galt6   | -2.43421 | 1.36E-67 | 4.51E-67 |
| Tshz3     | -3.80714 | 1.63E-67 | 5.42E-67 |
| Rpl9      | -0.34506 | 3.64E-68 | 1.22E-67 |
| Nlgn1     | -2.66199 | 7.00E-68 | 2.34E-67 |
| Chchd2    | -0.38097 | 2.37E-68 | 7.94E-68 |
| Pxn       | -1.04136 | 2.64E-68 | 8.85E-68 |
| Gm48207   | -4.18754 | 5.81E-68 | 1.94E-67 |
| Gas1      | -3.02301 | 5.06E-68 | 1.69E-67 |

|           |          |          |          |
|-----------|----------|----------|----------|
| BC064078  | -2.02889 | 3.63E-68 | 1.21E-67 |
| 2900052N  | -2.32759 | 3.64E-68 | 1.22E-67 |
| Antxr1    | -3.06269 | 3.14E-68 | 1.05E-67 |
| Fgfr3     | -4.48161 | 3.90E-68 | 1.30E-67 |
| Hsd17b4   | -1.22709 | 1.40E-68 | 4.71E-68 |
| Tnfrsf11a | -4.92452 | 2.60E-68 | 8.70E-68 |
| Dchs1     | -3.7392  | 2.07E-68 | 6.96E-68 |
| Tmc6      | -5.15134 | 2.17E-68 | 7.27E-68 |
| E130114P: | -1.64769 | 1.08E-68 | 3.64E-68 |
| Ddr1      | -2.2582  | 1.18E-68 | 3.97E-68 |
| Gpx7      | -3.50054 | 1.46E-68 | 4.91E-68 |
| Aga       | -3.4973  | 1.12E-68 | 3.76E-68 |
| Vsig2     | -5.43587 | 1.29E-68 | 4.32E-68 |
| Trpv2     | -4.55538 | 1.05E-68 | 3.52E-68 |
| Palld     | -2.89239 | 6.78E-69 | 2.28E-68 |
| Fam117b   | -0.91572 | 3.00E-69 | 1.01E-68 |
| Tanc2     | -2.57445 | 5.79E-69 | 1.95E-68 |
| Gmpr      | -2.92995 | 4.93E-69 | 1.66E-68 |
| Gimap4    | -5.96505 | 6.96E-69 | 2.34E-68 |
| Rest      | -1.03289 | 2.28E-69 | 7.69E-69 |
| Ezr       | -1.62919 | 1.91E-69 | 6.45E-69 |
| Prrx1     | -4.81096 | 3.44E-69 | 1.16E-68 |
| Shisal2b  | -1.59356 | 2.11E-69 | 7.14E-69 |
| Plekho2   | -2.54071 | 1.85E-69 | 6.26E-69 |
| Sbno2     | -1.33821 | 9.32E-70 | 3.17E-69 |
| Pck2      | -1.89477 | 9.49E-70 | 3.22E-69 |
| Rhod      | -3.62984 | 1.46E-69 | 4.94E-69 |
| Dock10    | -3.5181  | 1.11E-69 | 3.76E-69 |
| Sertad2   | -0.91301 | 4.91E-70 | 1.67E-69 |
| Fam13a    | -3.54255 | 1.12E-69 | 3.82E-69 |
| Smim11    | -0.77759 | 4.47E-70 | 1.52E-69 |
| Il15ra    | -5.39065 | 1.26E-69 | 4.29E-69 |
| Rhobtb3   | -2.2005  | 6.85E-70 | 2.33E-69 |
| Erf       | -1.48548 | 5.01E-70 | 1.71E-69 |
| Cd38      | -5.27596 | 1.15E-69 | 3.89E-69 |
| Tmem64    | -1.98248 | 4.38E-70 | 1.49E-69 |
| Samd4     | -3.17069 | 5.95E-70 | 2.03E-69 |
| Ddost     | -0.98198 | 2.73E-70 | 9.34E-70 |
| Hspb2     | -4.42023 | 6.63E-70 | 2.26E-69 |
| Ccdc88c   | -2.40213 | 3.33E-70 | 1.14E-69 |
| Tomm7     | -0.52871 | 1.18E-70 | 4.05E-70 |
| Mis18a    | -4.22521 | 3.62E-70 | 1.24E-69 |
| Src       | -2.64412 | 2.37E-70 | 8.10E-70 |
| Ntn1      | -5.00215 | 3.04E-70 | 1.04E-69 |
| Clip3     | -1.83394 | 1.56E-70 | 5.33E-70 |
| Rheb      | -0.64694 | 6.09E-71 | 2.10E-70 |
| Pcbd2     | -1.19464 | 7.86E-71 | 2.70E-70 |

|           |          |          |          |
|-----------|----------|----------|----------|
| Ly75      | -2.71663 | 1.21E-70 | 4.17E-70 |
| Cers6     | -3.34939 | 1.15E-70 | 3.93E-70 |
| Fkbp10    | -4.46221 | 1.26E-70 | 4.34E-70 |
| Arrb1     | -2.65265 | 6.49E-71 | 2.23E-70 |
| Gna12     | -1.39872 | 3.78E-71 | 1.31E-70 |
| Plpp1     | -1.44    | 3.55E-71 | 1.23E-70 |
| Col4a5    | -3.30697 | 6.21E-71 | 2.14E-70 |
| Gusb      | -2.10609 | 3.98E-71 | 1.37E-70 |
| Ndufa6    | -0.54346 | 1.61E-71 | 5.56E-71 |
| Bcl3      | -4.39839 | 3.84E-71 | 1.32E-70 |
| Epha5     | -1.46482 | 2.77E-71 | 9.57E-71 |
| Tmem59    | -0.48253 | 1.19E-71 | 4.11E-71 |
| B4galt5   | -4.16852 | 1.38E-71 | 4.79E-71 |
| Dusp2     | -3.83163 | 1.26E-71 | 4.38E-71 |
| Luzp2     | -2.21441 | 5.59E-72 | 1.94E-71 |
| Decr1     | -1.81522 | 3.72E-72 | 1.29E-71 |
| BC055402  | -1.89208 | 4.60E-72 | 1.60E-71 |
| Arf6      | -1.05912 | 2.46E-72 | 8.58E-72 |
| Pik3r3    | -1.22362 | 1.74E-72 | 6.08E-72 |
| Orai3     | -2.16536 | 2.06E-72 | 7.17E-72 |
| Asah2     | -4.0211  | 2.56E-72 | 8.92E-72 |
| Prmt2     | -2.3888  | 1.92E-72 | 6.71E-72 |
| Usp53     | -0.91115 | 9.56E-73 | 3.35E-72 |
| Lin7a     | -2.74143 | 1.71E-72 | 5.97E-72 |
| Slc16a12  | -4.36051 | 2.04E-72 | 7.12E-72 |
| Pkn3      | -5.09559 | 2.42E-72 | 8.44E-72 |
| Pde7b     | -5.52602 | 2.61E-72 | 9.08E-72 |
| Rab18     | -0.67298 | 5.12E-73 | 1.79E-72 |
| Rab33b    | -2.15832 | 6.45E-73 | 2.26E-72 |
| Erap1     | -1.60797 | 3.99E-73 | 1.40E-72 |
| Mmp14     | -3.79008 | 8.34E-73 | 2.92E-72 |
| P4hb      | -0.79125 | 1.75E-73 | 6.16E-73 |
| Cbr3      | -3.07886 | 2.30E-73 | 8.10E-73 |
| Insig1    | -1.88006 | 1.36E-73 | 4.80E-73 |
| Slc66a2   | -1.25083 | 1.04E-73 | 3.67E-73 |
| Tifa      | -3.03871 | 1.77E-73 | 6.24E-73 |
| Mt3       | -1.36131 | 1.19E-73 | 4.18E-73 |
| Sec24d    | -3.20966 | 1.14E-73 | 4.03E-73 |
| Klhl42    | -4.06548 | 1.19E-73 | 4.20E-73 |
| Wipi1     | -0.96512 | 3.93E-74 | 1.39E-73 |
| Cd40      | -4.85737 | 9.05E-74 | 3.20E-73 |
| Gucy1a2   | -5.11411 | 7.98E-74 | 2.82E-73 |
| Mdk       | -2.80348 | 5.13E-74 | 1.81E-73 |
| Scgb3a1   | -5.21612 | 6.45E-74 | 2.28E-73 |
| Birc3     | -4.558   | 4.36E-74 | 1.54E-73 |
| Rps18-ps6 | -0.72065 | 1.41E-74 | 5.02E-74 |
| Nsa2      | -0.8081  | 1.35E-74 | 4.81E-74 |

|           |          |          |          |
|-----------|----------|----------|----------|
| Bax       | -0.91368 | 1.25E-74 | 4.45E-74 |
| Rem1      | -5.93759 | 4.84E-74 | 1.71E-73 |
| Bmp5      | -3.48445 | 2.87E-74 | 1.02E-73 |
| mt-Co3    | -0.93257 | 9.36E-75 | 3.33E-74 |
| Qsox1     | -1.44499 | 8.91E-75 | 3.17E-74 |
| Rnd3      | -3.58132 | 1.66E-74 | 5.88E-74 |
| Mgst3     | -1.19495 | 5.88E-75 | 2.10E-74 |
| Tmem159   | -1.45708 | 5.56E-75 | 1.98E-74 |
| Atf3      | -1.39177 | 7.23E-75 | 2.57E-74 |
| Mpnd      | -1.78889 | 4.12E-75 | 1.47E-74 |
| Ghr       | -4.37447 | 6.95E-75 | 2.47E-74 |
| Rgma      | -3.78489 | 5.86E-75 | 2.09E-74 |
| Tppp3     | -2.3437  | 3.96E-75 | 1.42E-74 |
| S1pr4     | -4.53495 | 4.18E-75 | 1.49E-74 |
| Prkcb     | -2.70954 | 2.38E-75 | 8.52E-75 |
| Zbtb16    | -4.33418 | 3.06E-75 | 1.09E-74 |
| Car5b     | -2.71112 | 1.54E-75 | 5.53E-75 |
| Nectin3   | -1.67408 | 1.11E-75 | 3.97E-75 |
| Gfod1     | -4.04041 | 1.80E-75 | 6.46E-75 |
| Atoh8     | -5.03341 | 1.76E-75 | 6.32E-75 |
| Pla2g4a   | -4.13614 | 1.78E-75 | 6.37E-75 |
| Bex3      | -0.8806  | 4.87E-76 | 1.75E-75 |
| Gcnt1     | -4.9443  | 1.66E-75 | 5.94E-75 |
| Snai2     | -5.60411 | 1.64E-75 | 5.86E-75 |
| Wscd1     | -2.67548 | 8.91E-76 | 3.20E-75 |
| Tpd52l1   | -5.07363 | 1.19E-75 | 4.27E-75 |
| Kif5c     | -1.8261  | 4.27E-76 | 1.54E-75 |
| Efemp1    | -2.55537 | 6.58E-76 | 2.37E-75 |
| Hsd17b10  | -1.29909 | 3.05E-76 | 1.10E-75 |
| Rrp1      | -0.72482 | 2.25E-76 | 8.12E-76 |
| Btd       | -2.1928  | 4.85E-76 | 1.75E-75 |
| Adamts1   | -2.76286 | 4.70E-76 | 1.69E-75 |
| Atp5e     | -0.46198 | 1.26E-76 | 4.54E-76 |
| Calhm2    | -5.94034 | 6.36E-76 | 2.29E-75 |
| Trim8     | -1.08029 | 1.54E-76 | 5.56E-76 |
| Stim2     | -1.21416 | 1.62E-76 | 5.84E-76 |
| Procr     | -5.36922 | 4.57E-76 | 1.65E-75 |
| Adss      | -1.29496 | 1.45E-76 | 5.23E-76 |
| Zfp979    | -4.13881 | 3.72E-76 | 1.34E-75 |
| Eif4ebp1  | -2.34915 | 1.65E-76 | 5.95E-76 |
| Serpinb1a | -4.66386 | 2.81E-76 | 1.01E-75 |
| Baz1a     | -4.69851 | 2.59E-76 | 9.33E-76 |
| Fhl2      | -5.7454  | 2.93E-76 | 1.06E-75 |
| Ccdc91    | -1.8696  | 7.28E-77 | 2.64E-76 |
| Klhl24    | -0.78259 | 3.51E-77 | 1.28E-76 |
| Gdf11     | -3.49193 | 9.90E-77 | 3.59E-76 |
| Ddx60     | -4.45749 | 1.07E-76 | 3.88E-76 |

|           |          |          |          |
|-----------|----------|----------|----------|
| Hspa5     | -0.58689 | 2.45E-77 | 8.92E-77 |
| Prox1     | -2.18243 | 5.98E-77 | 2.17E-76 |
| Ptpa      | -0.78519 | 2.46E-77 | 8.98E-77 |
| Spon1     | -2.05927 | 5.82E-77 | 2.11E-76 |
| Smad3     | -3.61044 | 5.17E-77 | 1.88E-76 |
| Tmem100   | -5.71461 | 5.48E-77 | 1.99E-76 |
| Arsb      | -2.78473 | 3.15E-77 | 1.15E-76 |
| Iffo2     | -2.85687 | 3.11E-77 | 1.13E-76 |
| Rnaseh2c  | -0.87486 | 1.08E-77 | 3.97E-77 |
| Notum     | -5.3534  | 4.30E-77 | 1.56E-76 |
| 2310001H  | -3.42723 | 2.93E-77 | 1.07E-76 |
| Cstb      | -0.92133 | 8.39E-78 | 3.07E-77 |
| Nab2      | -3.77273 | 2.72E-77 | 9.91E-77 |
| Vat1l     | -1.9839  | 1.62E-77 | 5.91E-77 |
| Ralgds    | -2.25534 | 9.80E-78 | 3.59E-77 |
| Ltbp1     | -3.81542 | 1.79E-77 | 6.54E-77 |
| Sptlc2    | -1.19747 | 5.00E-78 | 1.83E-77 |
| Hlf       | -0.88436 | 4.81E-78 | 1.77E-77 |
| Ang       | -5.87355 | 1.46E-77 | 5.32E-77 |
| Nupr1     | -1.55532 | 3.94E-78 | 1.45E-77 |
| Heg1      | -0.6631  | 2.34E-78 | 8.62E-78 |
| Cep85l    | -1.90314 | 3.86E-78 | 1.42E-77 |
| Rftn1     | -4.67299 | 7.94E-78 | 2.91E-77 |
| P3h4      | -3.0951  | 4.77E-78 | 1.75E-77 |
| Coro1c    | -1.30146 | 1.79E-78 | 6.58E-78 |
| Znfx1     | -1.31365 | 1.91E-78 | 7.04E-78 |
| 4833403J1 | -5.0876  | 4.12E-78 | 1.51E-77 |
| Rcbtb2    | -2.39977 | 2.18E-78 | 8.03E-78 |
| Ncoa3     | -1.41757 | 1.02E-78 | 3.78E-78 |
| Rgs2      | -1.94816 | 1.39E-78 | 5.14E-78 |
| Man1c1    | -3.59431 | 1.55E-78 | 5.72E-78 |
| Sox5      | -3.08685 | 1.38E-78 | 5.10E-78 |
| Il6ra     | -4.9735  | 9.03E-79 | 3.34E-78 |
| Ifit3b    | -4.36943 | 8.10E-79 | 2.99E-78 |
| Sdc3      | -0.76251 | 1.85E-79 | 6.84E-79 |
| Mboat2    | -2.83198 | 3.74E-79 | 1.38E-78 |
| Lbr       | -1.08171 | 1.45E-79 | 5.38E-79 |
| Nxpe2     | -6.15818 | 5.68E-79 | 2.10E-78 |
| Fes       | -3.61569 | 2.93E-79 | 1.09E-78 |
| Ube2l6    | -3.75437 | 2.48E-79 | 9.21E-79 |
| Inpp5a    | -1.72073 | 9.08E-80 | 3.38E-79 |
| Tmed5     | -0.94261 | 5.49E-80 | 2.05E-79 |
| Vamp3     | -1.00064 | 4.72E-80 | 1.76E-79 |
| Galnt18   | -4.0912  | 1.68E-79 | 6.22E-79 |
| Tnfaip8l1 | -5.41604 | 1.61E-79 | 5.98E-79 |
| Slc9a3r1  | -1.58874 | 5.55E-80 | 2.07E-79 |
| Wee1      | -3.46679 | 7.80E-80 | 2.91E-79 |

|          |          |          |          |
|----------|----------|----------|----------|
| Dsel     | -4.62957 | 7.92E-80 | 2.95E-79 |
| Inpp5d   | -3.11078 | 4.11E-80 | 1.54E-79 |
| Pitpna   | -0.75975 | 1.32E-80 | 4.96E-80 |
| Papss1   | -1.27423 | 1.64E-80 | 6.16E-80 |
| Slc25a39 | -1.55644 | 2.10E-80 | 7.87E-80 |
| Frmd6    | -1.87244 | 2.10E-80 | 7.86E-80 |
| Col18a1  | -3.19983 | 2.62E-80 | 9.81E-80 |
| Klhl4    | -2.31837 | 1.73E-80 | 6.49E-80 |
| Slfn2    | -5.4843  | 3.40E-80 | 1.27E-79 |
| Tram2    | -4.49134 | 1.86E-80 | 6.95E-80 |
| Parm1    | -3.83696 | 1.76E-80 | 6.59E-80 |
| Sema6b   | -4.4075  | 1.83E-80 | 6.86E-80 |
| Col23a1  | -2.3919  | 1.06E-80 | 3.97E-80 |
| Trip6    | -2.73201 | 8.67E-81 | 3.26E-80 |
| Tm9sf3   | -0.62716 | 2.07E-81 | 7.80E-81 |
| Rnpepl1  | -1.22046 | 2.65E-81 | 9.97E-81 |
| Smim3    | -4.77182 | 9.33E-81 | 3.50E-80 |
| Timeless | -3.62923 | 7.35E-81 | 2.76E-80 |
| Abhd17a  | -0.83352 | 1.51E-81 | 5.70E-81 |
| Cox4i1   | -0.42274 | 1.05E-81 | 3.96E-81 |
| Slc36a4  | -2.45766 | 3.09E-81 | 1.17E-80 |
| Ncf2     | -4.61836 | 5.77E-81 | 2.17E-80 |
| Zfp423   | -3.0198  | 3.30E-81 | 1.24E-80 |
| Eps15    | -1.07903 | 1.20E-81 | 4.51E-81 |
| Cnp      | -2.69305 | 1.99E-81 | 7.51E-81 |
| Maf      | -3.11719 | 1.43E-81 | 5.41E-81 |
| Lpcat3   | -1.50205 | 3.47E-82 | 1.31E-81 |
| Gm48602  | -5.67915 | 1.15E-81 | 4.35E-81 |
| P4ha2    | -3.97752 | 9.08E-82 | 3.43E-81 |
| Pdcd10   | -0.79771 | 1.76E-82 | 6.67E-82 |
| Zfp362   | -2.13954 | 2.54E-82 | 9.63E-82 |
| Kalrn    | -2.70742 | 2.63E-82 | 9.96E-82 |
| Relb     | -3.727   | 3.38E-82 | 1.28E-81 |
| Acta2    | -3.26315 | 3.17E-82 | 1.20E-81 |
| Uqcc2    | -0.66017 | 7.25E-83 | 2.76E-82 |
| Foxf1    | -5.10855 | 3.21E-82 | 1.22E-81 |
| Ctsd     | -0.84541 | 5.75E-83 | 2.19E-82 |
| Pgm2     | -3.19097 | 1.07E-82 | 4.07E-82 |
| Fam43a   | -2.01482 | 4.72E-83 | 1.80E-82 |
| Serp2    | -3.05146 | 7.90E-83 | 3.00E-82 |
| Dgka     | -3.98013 | 9.80E-83 | 3.72E-82 |
| Ttc32    | -3.24872 | 4.87E-83 | 1.85E-82 |
| Sntb1    | -2.347   | 3.84E-83 | 1.46E-82 |
| Cdh11    | -2.49094 | 3.13E-83 | 1.19E-82 |
| Mospd2   | -1.58022 | 1.51E-83 | 5.76E-83 |
| Eps8l2   | -4.68274 | 3.71E-83 | 1.41E-82 |
| Tmem109  | -1.03493 | 7.67E-84 | 2.94E-83 |

|          |          |          |          |
|----------|----------|----------|----------|
| Mcm6     | -3.23699 | 2.43E-83 | 9.29E-83 |
| Gnai3    | -1.13123 | 5.52E-84 | 2.12E-83 |
| Eif3a    | -0.59556 | 3.47E-84 | 1.33E-83 |
| Mbd2     | -0.81822 | 4.10E-84 | 1.58E-83 |
| Crybg1   | -5.48907 | 1.88E-83 | 7.20E-83 |
| Atp8b1   | -5.58876 | 1.83E-83 | 7.01E-83 |
| Nsmce1   | -1.29361 | 3.03E-84 | 1.17E-83 |
| Prkacb   | -0.88059 | 2.38E-84 | 9.17E-84 |
| Rps6ka1  | -3.54634 | 8.01E-84 | 3.07E-83 |
| Gm44937  | -7.09168 | 1.17E-83 | 4.47E-83 |
| Trim65   | -2.90092 | 3.73E-84 | 1.43E-83 |
| Dop1b    | -2.82485 | 2.57E-84 | 9.89E-84 |
| Ppm1m    | -4.36983 | 3.75E-84 | 1.44E-83 |
| Arhgef6  | -4.41076 | 3.07E-84 | 1.18E-83 |
| Impa2    | -4.57669 | 3.09E-84 | 1.19E-83 |
| Tmem63a  | -4.39419 | 2.70E-84 | 1.04E-83 |
| Gm43923  | -6.69517 | 2.90E-84 | 1.12E-83 |
| Shfl     | -3.23572 | 1.59E-84 | 6.13E-84 |
| Cdc42se2 | -1.34309 | 5.64E-85 | 2.19E-84 |
| Ube2e2   | -2.36117 | 1.12E-84 | 4.34E-84 |
| Chmp5    | -0.73897 | 3.66E-85 | 1.42E-84 |
| Nckap5l  | -4.24972 | 1.91E-84 | 7.38E-84 |
| P2rx4    | -3.17448 | 9.56E-85 | 3.70E-84 |
| Tap1     | -2.79198 | 5.73E-85 | 2.22E-84 |
| Trf      | -2.70148 | 7.45E-85 | 2.88E-84 |
| Plbd2    | -2.08656 | 2.85E-85 | 1.11E-84 |
| Sgk3     | -2.4587  | 2.65E-85 | 1.03E-84 |
| Cd82     | -3.78026 | 4.53E-85 | 1.76E-84 |
| Ddhd2    | -2.06646 | 1.56E-85 | 6.06E-85 |
| Mark1    | -2.93616 | 1.82E-85 | 7.07E-85 |
| Mpp2     | -2.78984 | 1.52E-85 | 5.91E-85 |
| Slc6a11  | -2.25364 | 1.40E-85 | 5.45E-85 |
| Ddc      | -5.27137 | 2.39E-85 | 9.28E-85 |
| Gm37082  | -5.60914 | 1.33E-85 | 5.17E-85 |
| Phlda1   | -3.04456 | 3.76E-86 | 1.47E-85 |
| Lrg1     | -3.84986 | 4.19E-86 | 1.64E-85 |
| Nampt    | -1.19123 | 9.26E-87 | 3.64E-86 |
| Grk3     | -3.19994 | 1.48E-86 | 5.81E-86 |
| Klhl2    | -1.18657 | 5.02E-87 | 1.98E-86 |
| Plscr2   | -4.26615 | 1.48E-86 | 5.82E-86 |
| Angpt2   | -4.13874 | 1.50E-86 | 5.88E-86 |
| Sdf4     | -0.76972 | 2.72E-87 | 1.07E-86 |
| Rgs16    | -3.45355 | 8.81E-87 | 3.46E-86 |
| Fads3    | -3.87254 | 9.13E-87 | 3.59E-86 |
| Prdm5    | -3.17242 | 4.65E-87 | 1.83E-86 |
| Tbc1d9b  | -1.63125 | 1.72E-87 | 6.80E-87 |
| Phactr4  | -1.0374  | 7.00E-88 | 2.78E-87 |



|           |          |          |          |
|-----------|----------|----------|----------|
| Sun2      | -2.04752 | 1.30E-87 | 5.16E-87 |
| Fbln2     | -5.34729 | 3.33E-87 | 1.32E-86 |
| Fth1      | -0.40431 | 4.64E-88 | 1.84E-87 |
| Rpn2      | -0.81933 | 4.02E-88 | 1.60E-87 |
| Epha2     | -3.81591 | 1.23E-87 | 4.86E-87 |
| Selenon   | -2.62145 | 9.45E-88 | 3.75E-87 |
| Ptpn12    | -1.20839 | 3.78E-88 | 1.51E-87 |
| 5330432J1 | -3.35177 | 8.98E-88 | 3.56E-87 |
| Pdcd6ip   | -0.99719 | 2.94E-88 | 1.17E-87 |
| Syn3      | -3.86571 | 1.13E-87 | 4.49E-87 |
| Kank4     | -5.90004 | 1.45E-87 | 5.73E-87 |
| Nt5c2     | -1.22895 | 2.39E-88 | 9.54E-88 |
| Syt15     | -3.77133 | 9.70E-88 | 3.84E-87 |
| Mtss2     | -2.22739 | 4.80E-88 | 1.91E-87 |
| Synpo     | -4.59301 | 9.41E-88 | 3.73E-87 |
| Spata6    | -1.75495 | 2.60E-88 | 1.04E-87 |
| Nfatc4    | -4.15002 | 6.70E-88 | 2.66E-87 |
| Apobec3   | -4.58195 | 7.09E-88 | 2.82E-87 |
| Far2      | -3.86325 | 4.11E-88 | 1.64E-87 |
| Ccdc9b    | -4.42181 | 4.11E-88 | 1.64E-87 |
| Ppp1r15a  | -1.44922 | 1.03E-88 | 4.11E-88 |
| Sh3d19    | -4.76465 | 2.80E-88 | 1.12E-87 |
| mt-Atp8   | -0.68725 | 4.58E-89 | 1.84E-88 |
| Ttl       | -3.83886 | 2.28E-88 | 9.09E-88 |
| Dnase1l1  | -2.51488 | 1.29E-88 | 5.15E-88 |
| Cmip      | -1.47719 | 7.15E-89 | 2.87E-88 |
| Slc30a10  | -4.13567 | 1.65E-88 | 6.60E-88 |
| Gamt      | -1.95192 | 5.02E-89 | 2.01E-88 |
| Stx12     | -0.96672 | 1.19E-89 | 4.81E-89 |
| Stard3nl  | -1.35055 | 1.33E-89 | 5.38E-89 |
| Pld1      | -4.81436 | 4.81E-89 | 1.93E-88 |
| Bcl2l12   | -4.57688 | 4.34E-89 | 1.74E-88 |
| Rnf144b   | -1.13648 | 7.56E-90 | 3.06E-89 |
| Tgoln1    | -0.83756 | 5.84E-90 | 2.36E-89 |
| Bcl6b     | -5.17348 | 4.06E-89 | 1.63E-88 |
| Comt      | -1.20646 | 7.25E-90 | 2.93E-89 |
| Gm48204   | -4.72026 | 2.94E-89 | 1.18E-88 |
| Ldb1      | -1.40873 | 5.87E-90 | 2.37E-89 |
| Rpl7a     | -0.50998 | 1.70E-90 | 6.92E-90 |
| Ginm1     | -1.06395 | 2.15E-90 | 8.71E-90 |
| Herc6     | -4.00531 | 9.58E-90 | 3.87E-89 |
| Tapbp1    | -3.30733 | 6.07E-90 | 2.45E-89 |
| Sobp      | -2.72015 | 4.98E-90 | 2.01E-89 |
| Ptpn9     | -2.02897 | 1.84E-90 | 7.45E-90 |
| Cpne3     | -0.9185  | 6.84E-91 | 2.79E-90 |
| Tead4     | -6.52913 | 3.33E-90 | 1.35E-89 |
| Pip5k1b   | -2.85929 | 1.63E-90 | 6.63E-90 |

|          |          |          |          |
|----------|----------|----------|----------|
| Rpl13a   | -0.7771  | 2.85E-91 | 1.16E-90 |
| Fmo5     | -5.26421 | 1.53E-90 | 6.22E-90 |
| Ralbp1   | -0.69581 | 1.39E-91 | 5.70E-91 |
| Chmp2b   | -1.26147 | 1.97E-91 | 8.05E-91 |
| Ugp2     | -1.34352 | 1.53E-91 | 6.27E-91 |
| Pla1a    | -6.00754 | 7.85E-91 | 3.20E-90 |
| Npm1     | -0.60404 | 5.99E-92 | 2.46E-91 |
| Gm32688  | -5.40516 | 4.65E-91 | 1.90E-90 |
| Map3k8   | -3.63643 | 2.34E-91 | 9.57E-91 |
| Gsn      | -3.78153 | 2.47E-91 | 1.01E-90 |
| Rhpn2    | -2.50854 | 1.49E-91 | 6.11E-91 |
| Rab31    | -3.95254 | 2.23E-91 | 9.09E-91 |
| Svbp     | -1.44384 | 5.94E-92 | 2.44E-91 |
| Ndufa7   | -0.55646 | 2.25E-92 | 9.27E-92 |
| Rhog     | -2.09997 | 6.80E-92 | 2.79E-91 |
| Nos3     | -0.95245 | 2.52E-92 | 1.04E-91 |
| Cemip2   | -2.06398 | 3.49E-92 | 1.44E-91 |
| Eif3k    | -0.69141 | 8.76E-93 | 3.62E-92 |
| Ubxn1    | -0.71444 | 6.20E-93 | 2.56E-92 |
| Mr1      | -4.02726 | 4.17E-92 | 1.71E-91 |
| Meox1    | -5.6884  | 4.82E-92 | 1.98E-91 |
| Hspb8    | -5.13331 | 2.49E-92 | 1.03E-91 |
| Mgst1    | -3.63868 | 1.62E-92 | 6.67E-92 |
| Nfatc1   | -6.09509 | 2.06E-92 | 8.47E-92 |
| Btg2     | -0.67574 | 2.67E-93 | 1.11E-92 |
| Skp1     | -0.76979 | 1.56E-93 | 6.47E-93 |
| Gng2     | -3.74464 | 7.35E-93 | 3.04E-92 |
| Msrb2    | -3.58678 | 5.50E-93 | 2.27E-92 |
| Rack1    | -0.49153 | 6.51E-94 | 2.71E-93 |
| Tmem254i | -3.0407  | 3.01E-93 | 1.25E-92 |
| Gab2     | -3.52394 | 2.23E-93 | 9.25E-93 |
| Trp53    | -1.91135 | 1.14E-93 | 4.74E-93 |
| Nynrin   | -3.21438 | 1.69E-93 | 7.01E-93 |
| Thrsp    | -2.61687 | 1.33E-93 | 5.52E-93 |
| Pcolce   | -3.52787 | 2.30E-93 | 9.52E-93 |
| Psme2b   | -6.1288  | 3.41E-93 | 1.41E-92 |
| Usp18    | -4.93746 | 2.45E-93 | 1.02E-92 |
| Tmem160  | -0.97353 | 2.18E-94 | 9.14E-94 |
| Tspan6   | -5.18721 | 9.99E-94 | 4.16E-93 |
| L3mbtl3  | -4.02245 | 4.85E-94 | 2.02E-93 |
| Abat     | -2.15023 | 2.37E-94 | 9.90E-94 |
| Pdpf     | -0.98756 | 7.86E-95 | 3.30E-94 |
| Vegfc    | -5.15042 | 4.07E-94 | 1.70E-93 |
| Ifit2    | -4.9188  | 3.72E-94 | 1.55E-93 |
| AU020206 | -5.10769 | 2.61E-94 | 1.09E-93 |
| Morrbid  | -4.5871  | 1.94E-94 | 8.13E-94 |
| Gbe1     | -1.34526 | 3.87E-95 | 1.63E-94 |

|           |          |          |          |
|-----------|----------|----------|----------|
| Smim10l1  | -0.83414 | 2.06E-95 | 8.68E-95 |
| Igfbp4    | -3.24703 | 4.92E-95 | 2.07E-94 |
| Meg3      | -2.11351 | 2.95E-95 | 1.24E-94 |
| Evi5      | -0.96376 | 1.02E-95 | 4.30E-95 |
| Bloc1s1   | -1.49971 | 1.43E-95 | 6.04E-95 |
| Tmem238   | -2.90942 | 2.75E-95 | 1.16E-94 |
| Casp12    | -5.503   | 4.23E-95 | 1.78E-94 |
| Rhobtb1   | -1.56074 | 7.13E-96 | 3.01E-95 |
| Rps17     | -0.46592 | 1.03E-96 | 4.36E-96 |
| Map1lc3b  | -0.66763 | 1.06E-96 | 4.49E-96 |
| Adgra3    | -3.78646 | 8.66E-96 | 3.66E-95 |
| Farp1     | -2.74016 | 3.69E-96 | 1.56E-95 |
| 9530026P1 | -6.83997 | 7.46E-96 | 3.15E-95 |
| Tfdp2     | -1.47012 | 9.83E-97 | 4.18E-96 |
| Mn1       | -4.81396 | 4.31E-96 | 1.82E-95 |
| Tmem47    | -3.27515 | 2.63E-96 | 1.12E-95 |
| Spsb1     | -5.07644 | 4.02E-96 | 1.70E-95 |
| Nrgn      | -4.44613 | 2.63E-96 | 1.12E-95 |
| Nde1      | -1.67805 | 8.03E-97 | 3.42E-96 |
| Cdkn2b    | -5.4147  | 2.94E-96 | 1.25E-95 |
| Metrn     | -1.63021 | 4.39E-97 | 1.87E-96 |
| Pard3     | -1.28767 | 2.16E-97 | 9.23E-97 |
| Cd99l2    | -2.29061 | 4.03E-97 | 1.72E-96 |
| Mtch1     | -0.91498 | 1.05E-97 | 4.50E-97 |
| Pfn2      | -0.94882 | 1.49E-97 | 6.39E-97 |
| Isyna1    | -1.16846 | 1.08E-97 | 4.63E-97 |
| Sub1      | -0.65599 | 5.96E-98 | 2.56E-97 |
| Tnfrsf1b  | -4.87338 | 4.89E-97 | 2.08E-96 |
| Iscu      | -1.01714 | 4.28E-98 | 1.84E-97 |
| Ywhaq     | -0.63553 | 2.89E-98 | 1.25E-97 |
| Tlr3      | -4.37965 | 2.13E-97 | 9.08E-97 |
| Prex1     | -3.03312 | 1.28E-97 | 5.50E-97 |
| Stk10     | -3.84583 | 2.25E-97 | 9.59E-97 |
| Slmap     | -0.92784 | 3.47E-98 | 1.50E-97 |
| Ncor2     | -1.24787 | 2.66E-98 | 1.15E-97 |
| Tbxa2r    | -5.49638 | 1.83E-97 | 7.82E-97 |
| Map3k6    | -5.21697 | 1.46E-97 | 6.23E-97 |
| Foxs1     | -4.65272 | 1.24E-97 | 5.34E-97 |
| Carmn     | -6.01801 | 1.50E-97 | 6.40E-97 |
| Gimap9    | -6.0789  | 1.44E-97 | 6.16E-97 |
| Cacna2d1  | -3.49105 | 6.30E-98 | 2.71E-97 |
| Rasl12    | -4.76092 | 6.13E-98 | 2.63E-97 |
| Tmod2     | -2.00597 | 1.57E-98 | 6.80E-98 |
| Ddr2      | -4.85329 | 4.87E-98 | 2.10E-97 |
| Cers2     | -1.31871 | 7.18E-99 | 3.11E-98 |
| Carhsp1   | -2.87146 | 1.64E-98 | 7.11E-98 |
| Cyp26b1   | -5.39179 | 3.85E-98 | 1.66E-97 |

|            |          |           |           |
|------------|----------|-----------|-----------|
| Anapc5     | -0.99686 | 3.51E-99  | 1.52E-98  |
| Rock1      | -0.67751 | 2.21E-99  | 9.61E-99  |
| Mcub       | -5.25629 | 1.92E-98  | 8.30E-98  |
| Drap1      | -0.73774 | 1.42E-99  | 6.21E-99  |
| Ajap1      | -5.4249  | 1.69E-98  | 7.31E-98  |
| Sh3tc1     | -5.33881 | 1.70E-98  | 7.37E-98  |
| Fnbp1      | -2.0941  | 1.92E-99  | 8.34E-99  |
| Csf1       | -4.46592 | 4.60E-99  | 2.00E-98  |
| G0s2       | -4.78969 | 4.72E-99  | 2.05E-98  |
| Dram2      | -1.23847 | 6.52E-100 | 2.85E-99  |
| Ptgfrn     | -4.36607 | 3.07E-99  | 1.34E-98  |
| Hcfc1r1    | -0.92442 | 4.20E-100 | 1.84E-99  |
| Sec61b     | -0.78627 | 3.54E-100 | 1.55E-99  |
| Ppm1k      | -3.68127 | 1.18E-99  | 5.15E-99  |
| Maff       | -5.00992 | 1.62E-99  | 7.05E-99  |
| Fndc3b     | -1.48295 | 1.94E-100 | 8.51E-100 |
| Gdi2       | -0.73325 | 4.02E-101 | 1.76E-100 |
| Vsx2       | -2.12352 | 1.55E-100 | 6.77E-100 |
| Serinc1    | -0.74541 | 2.75E-101 | 1.21E-100 |
| St6galnac4 | -3.90877 | 2.20E-100 | 9.64E-100 |
| Rab11fip5  | -2.20521 | 9.32E-101 | 4.08E-100 |
| Tbx3os1    | -4.68582 | 9.75E-101 | 4.27E-100 |
| Psma6      | -0.79624 | 8.31E-102 | 3.67E-101 |
| Uba7       | -3.17752 | 4.49E-101 | 1.97E-100 |
| Ripk1      | -2.22056 | 1.99E-101 | 8.78E-101 |
| Plscr1     | -3.48933 | 3.12E-101 | 1.37E-100 |
| Osbp1a     | -0.94732 | 4.08E-102 | 1.81E-101 |
| Enpp2      | -2.17311 | 1.71E-101 | 7.55E-101 |
| Cyb5b      | -1.3239  | 3.72E-102 | 1.65E-101 |
| Mmp15      | -2.47723 | 1.10E-101 | 4.86E-101 |
| Rnd2       | -1.45584 | 4.24E-102 | 1.87E-101 |
| Rps15      | -0.43964 | 9.50E-103 | 4.23E-102 |
| Hlx        | -6.20108 | 2.31E-101 | 1.02E-100 |
| Unc93b1    | -4.72416 | 1.61E-101 | 7.08E-101 |
| Lamp2      | -0.96298 | 1.69E-102 | 7.52E-102 |
| Parp8      | -3.11344 | 5.73E-102 | 2.53E-101 |
| Htra3      | -4.35166 | 9.27E-102 | 4.09E-101 |
| Lap3       | -1.79342 | 2.39E-102 | 1.06E-101 |
| Phxr4      | -4.17183 | 7.62E-102 | 3.37E-101 |
| Gm15998    | -5.94888 | 8.66E-102 | 3.83E-101 |
| Plcl1      | -2.79118 | 2.71E-102 | 1.20E-101 |
| Tmbim1     | -1.54181 | 7.76E-103 | 3.45E-102 |
| Sox2       | -2.4771  | 1.64E-102 | 7.27E-102 |
| 2810025M   | -1.17072 | 2.76E-103 | 1.23E-102 |
| Six3os1    | -2.15102 | 7.13E-103 | 3.17E-102 |
| Pgap4      | -3.85139 | 1.14E-102 | 5.07E-102 |
| Mdfic      | -4.32566 | 1.32E-102 | 5.85E-102 |

|          |          |           |           |
|----------|----------|-----------|-----------|
| Atp13a5  | -4.49218 | 9.95E-103 | 4.43E-102 |
| Atp5j    | -0.53977 | 5.94E-104 | 2.66E-103 |
| Susd6    | -1.39159 | 1.20E-103 | 5.35E-103 |
| GImp     | -1.44724 | 1.08E-103 | 4.85E-103 |
| Gstm7    | -4.44673 | 4.99E-103 | 2.22E-102 |
| Vangl2   | -2.72826 | 1.74E-103 | 7.77E-103 |
| Sdc2     | -1.28922 | 7.99E-104 | 3.58E-103 |
| Emc10    | -1.14436 | 3.40E-104 | 1.53E-103 |
| Acbd6    | -1.47495 | 3.24E-104 | 1.46E-103 |
| Spata6l  | -2.94405 | 7.14E-104 | 3.20E-103 |
| Hadh     | -1.26051 | 1.65E-104 | 7.46E-104 |
| Adora2a  | -5.70391 | 9.73E-104 | 4.36E-103 |
| Pth1r    | -3.46334 | 4.43E-104 | 1.99E-103 |
| Ch25h    | -5.25288 | 9.05E-104 | 4.06E-103 |
| Lpar4    | -6.33994 | 9.89E-104 | 4.43E-103 |
| Ldhb     | -1.0414  | 7.78E-105 | 3.51E-104 |
| Gfra2    | -3.50197 | 3.76E-104 | 1.69E-103 |
| Itgav    | -1.79917 | 9.83E-105 | 4.44E-104 |
| Pnp      | -1.31243 | 4.47E-105 | 2.02E-104 |
| Shroom1  | -5.13041 | 2.01E-104 | 9.04E-104 |
| Ptprd    | -1.83515 | 6.19E-105 | 2.80E-104 |
| Rhbdf1   | -3.92915 | 1.03E-104 | 4.66E-104 |
| Crispld1 | -5.08853 | 1.32E-104 | 5.95E-104 |
| Elob     | -0.57608 | 6.16E-106 | 2.80E-105 |
| Ccdc102a | -4.79595 | 1.17E-104 | 5.28E-104 |
| Mvp      | -2.37692 | 3.42E-105 | 1.55E-104 |
| Arf4     | -0.89064 | 8.57E-106 | 3.89E-105 |
| Gipc3    | -5.07395 | 6.76E-105 | 3.05E-104 |
| Synpr    | -2.30626 | 1.40E-105 | 6.37E-105 |
| Ajuba    | -3.84479 | 1.61E-105 | 7.30E-105 |
| Als2cl   | -5.30104 | 1.97E-105 | 8.94E-105 |
| Slc25a30 | -3.14886 | 7.76E-106 | 3.52E-105 |
| Six3     | -1.77388 | 3.77E-106 | 1.71E-105 |
| Zic5     | -4.30198 | 1.00E-105 | 4.54E-105 |
| Mfge8    | -0.74523 | 1.04E-106 | 4.77E-106 |
| Zfp608   | -2.22205 | 2.42E-106 | 1.10E-105 |
| Mospd1   | -1.54189 | 1.03E-106 | 4.69E-106 |
| Cpq      | -3.75106 | 4.76E-106 | 2.16E-105 |
| Rela     | -1.45695 | 8.08E-107 | 3.69E-106 |
| Rgs7bp   | -4.04916 | 4.13E-106 | 1.88E-105 |
| Smo      | -3.48442 | 2.90E-106 | 1.32E-105 |
| Rpl4     | -0.54983 | 1.87E-107 | 8.59E-107 |
| Coq10b   | -1.53365 | 3.93E-107 | 1.80E-106 |
| Pde2a    | -5.4435  | 2.50E-106 | 1.14E-105 |
| Mir100hg | -3.62164 | 1.49E-106 | 6.79E-106 |
| Pkn1     | -1.37732 | 2.60E-107 | 1.19E-106 |
| Rab7     | -0.87431 | 1.13E-107 | 5.19E-107 |

|            |          |           |           |
|------------|----------|-----------|-----------|
| Herpud1    | -1.15396 | 9.17E-108 | 4.22E-107 |
| Mapt       | -2.51944 | 3.54E-107 | 1.62E-106 |
| Csrnp1     | -4.03638 | 6.67E-107 | 3.05E-106 |
| Btbd3      | -1.85797 | 1.58E-107 | 7.27E-107 |
| Mxra8      | -4.20666 | 6.16E-107 | 2.82E-106 |
| Pold4      | -1.76388 | 8.86E-108 | 4.08E-107 |
| Pdlim1     | -4.0428  | 3.70E-107 | 1.69E-106 |
| Tox3       | -2.32289 | 1.37E-107 | 6.28E-107 |
| Syt11      | -2.11786 | 8.03E-108 | 3.70E-107 |
| Rpl3       | -0.52064 | 1.26E-108 | 5.82E-108 |
| Ywhaz      | -0.61067 | 1.25E-108 | 5.76E-108 |
| Icam1      | -4.92905 | 2.15E-107 | 9.85E-107 |
| Casp6      | -2.69929 | 5.12E-108 | 2.36E-107 |
| Hmgn3      | -1.24436 | 1.25E-108 | 5.80E-108 |
| Tceal9     | -0.85226 | 6.13E-109 | 2.84E-108 |
| Lats2      | -1.09623 | 7.08E-109 | 3.28E-108 |
| Phf11d     | -5.15677 | 6.63E-108 | 3.06E-107 |
| Lrrc8a     | -1.30243 | 5.27E-109 | 2.44E-108 |
| Oaz2       | -1.01427 | 2.61E-109 | 1.21E-108 |
| Plod2      | -3.48415 | 1.53E-108 | 7.06E-108 |
| Shank3     | -5.21669 | 1.61E-108 | 7.42E-108 |
| Stx7       | -1.23952 | 6.80E-110 | 3.17E-109 |
| D8Erttd738 | -0.75106 | 3.04E-110 | 1.42E-109 |
| Gmds       | -3.12358 | 1.92E-109 | 8.92E-109 |
| Zfp945     | -3.11473 | 2.70E-109 | 1.26E-108 |
| Tspan2     | -5.22598 | 4.93E-109 | 2.29E-108 |
| Rcan2      | -3.53119 | 1.83E-109 | 8.49E-109 |
| Gsdmd      | -5.38711 | 1.32E-109 | 6.13E-109 |
| Gm44220    | -5.56103 | 1.25E-109 | 5.84E-109 |
| Sbspon     | -2.94038 | 6.24E-110 | 2.92E-109 |
| Stk24      | -1.6704  | 1.28E-110 | 6.02E-110 |
| Pdpn       | -2.9608  | 6.28E-110 | 2.93E-109 |
| Mafk       | -2.75194 | 2.16E-110 | 1.01E-109 |
| Tmem14c    | -1.1164  | 3.91E-111 | 1.84E-110 |
| Ssr4       | -0.96027 | 3.32E-111 | 1.57E-110 |
| Cdc42se1   | -1.79388 | 7.56E-111 | 3.56E-110 |
| Vsig10     | -4.86104 | 4.44E-110 | 2.07E-109 |
| Dach1      | -1.47168 | 5.93E-111 | 2.79E-110 |
| Aph1a      | -1.25102 | 2.77E-111 | 1.31E-110 |
| Rab5c      | -1.00253 | 1.39E-111 | 6.59E-111 |
| Fbxo2      | -1.77768 | 4.90E-111 | 2.31E-110 |
| Tpcn1      | -1.70967 | 3.27E-111 | 1.55E-110 |
| Pfdn5      | -0.54193 | 6.51E-112 | 3.08E-111 |
| Nuak1      | -4.67041 | 1.49E-110 | 6.97E-110 |
| Acads      | -3.40507 | 7.70E-111 | 3.62E-110 |
| Ak3        | -1.20779 | 4.50E-112 | 2.13E-111 |
| Runx1t1    | -3.16437 | 1.93E-111 | 9.10E-111 |

|            |          |           |           |
|------------|----------|-----------|-----------|
| Il33       | -2.07101 | 1.51E-111 | 7.14E-111 |
| Atf5       | -2.18966 | 1.18E-111 | 5.57E-111 |
| Unc13c     | -1.86347 | 5.82E-112 | 2.76E-111 |
| Paqr7      | -2.56473 | 7.82E-112 | 3.70E-111 |
| Kcnj10     | -2.86738 | 8.27E-112 | 3.91E-111 |
| Tead2      | -3.12182 | 4.22E-112 | 2.00E-111 |
| Rbms3      | -4.70643 | 5.98E-112 | 2.83E-111 |
| Sh3rf1     | -3.46015 | 2.35E-112 | 1.12E-111 |
| Rab13      | -1.64921 | 2.16E-113 | 1.03E-112 |
| Pdcd6      | -1.13305 | 8.40E-114 | 4.01E-113 |
| Arhgef12   | -0.69105 | 4.64E-114 | 2.22E-113 |
| Kif5b      | -0.60257 | 3.46E-114 | 1.66E-113 |
| Layn       | -5.95901 | 9.78E-113 | 4.65E-112 |
| Dusp16     | -3.03394 | 2.66E-113 | 1.27E-112 |
| Prkd3      | -1.22838 | 4.21E-114 | 2.02E-113 |
| Rnf130     | -1.30762 | 3.51E-114 | 1.68E-113 |
| Vkorc1     | -2.16694 | 3.56E-114 | 1.70E-113 |
| Csgalnact1 | -5.43284 | 1.46E-113 | 6.97E-113 |
| Lncpint    | -4.35262 | 4.94E-114 | 2.36E-113 |
| Arfgap3    | -3.12099 | 3.38E-114 | 1.62E-113 |
| Spns2      | -4.71292 | 6.11E-114 | 2.92E-113 |
| Dact1      | -4.79415 | 6.21E-114 | 2.96E-113 |
| Hipk1      | -0.97623 | 2.96E-115 | 1.43E-114 |
| Spry4      | -4.10287 | 2.92E-114 | 1.40E-113 |
| Map3k11    | -1.91158 | 4.92E-115 | 2.37E-114 |
| Itprid2    | -1.05574 | 2.30E-115 | 1.11E-114 |
| Pak3       | -1.77458 | 4.85E-115 | 2.33E-114 |
| Snx9       | -2.12314 | 2.78E-115 | 1.34E-114 |
| Smad6      | -4.88492 | 1.25E-114 | 6.00E-114 |
| Arhgef40   | -3.70043 | 8.43E-115 | 4.05E-114 |
| Mical1     | -4.2807  | 4.30E-115 | 2.07E-114 |
| Flrt2      | -3.53077 | 4.45E-115 | 2.14E-114 |
| Mustn1     | -4.73547 | 5.73E-115 | 2.75E-114 |
| Efnb1      | -2.30768 | 1.27E-115 | 6.13E-115 |
| Slc12a7    | -4.30315 | 3.12E-115 | 1.50E-114 |
| Mlc1       | -2.40795 | 2.14E-115 | 1.03E-114 |
| Lfng       | -4.77947 | 3.12E-115 | 1.50E-114 |
| Sp110      | -5.71882 | 1.23E-115 | 5.93E-115 |
| mt-Nd5     | -0.59999 | 2.51E-117 | 1.22E-116 |
| Vamp8      | -0.95291 | 3.50E-117 | 1.71E-116 |
| Slc49a4    | -2.7278  | 9.98E-117 | 4.85E-116 |
| Zdhhc18    | -2.01429 | 2.75E-117 | 1.34E-116 |
| Bnip2      | -0.778   | 5.59E-118 | 2.74E-117 |
| Maged2     | -2.06962 | 2.36E-117 | 1.15E-116 |
| Cdc42ep5   | -5.13677 | 1.14E-116 | 5.53E-116 |
| Cdc42bpb   | -1.19356 | 7.49E-118 | 3.67E-117 |
| Tgfa       | -4.02513 | 5.67E-117 | 2.77E-116 |

|          |          |           |           |
|----------|----------|-----------|-----------|
| Sft2d2   | -1.89165 | 1.11E-117 | 5.43E-117 |
| Itga7    | -4.42069 | 3.73E-117 | 1.82E-116 |
| Tfpi     | -4.62692 | 2.06E-117 | 1.01E-116 |
| Bri3     | -0.77098 | 5.66E-119 | 2.80E-118 |
| Git1     | -1.56059 | 1.43E-118 | 7.03E-118 |
| Adm      | -5.32173 | 1.08E-117 | 5.27E-117 |
| Pianp    | -3.92737 | 1.86E-118 | 9.14E-118 |
| Gstt1    | -2.35404 | 8.44E-119 | 4.16E-118 |
| Nab1     | -1.42616 | 2.19E-119 | 1.08E-118 |
| Inpp5f   | -2.37086 | 4.48E-119 | 2.21E-118 |
| Pax6     | -1.99487 | 4.32E-119 | 2.14E-118 |
| Steap3   | -5.17705 | 1.67E-118 | 8.23E-118 |
| Tmem256  | -0.89606 | 5.46E-120 | 2.72E-119 |
| Dnm2     | -1.14412 | 6.35E-120 | 3.16E-119 |
| Rabac1   | -0.60847 | 3.36E-120 | 1.67E-119 |
| Akt1     | -1.35328 | 8.05E-120 | 4.00E-119 |
| Afap1    | -2.77333 | 2.13E-119 | 1.05E-118 |
| Ogn      | -5.36248 | 6.85E-119 | 3.38E-118 |
| Enpep    | -5.23567 | 4.34E-119 | 2.15E-118 |
| Skil     | -1.26931 | 2.57E-120 | 1.28E-119 |
| St6gal1  | -4.53247 | 2.01E-119 | 9.99E-119 |
| Nrarp    | -3.13028 | 7.53E-120 | 3.75E-119 |
| Pik3r6   | -6.11117 | 2.81E-119 | 1.39E-118 |
| Ccnd3    | -1.17425 | 7.36E-121 | 3.69E-120 |
| Gtf2i    | -0.94966 | 4.92E-121 | 2.47E-120 |
| Irf9     | -1.8156  | 1.19E-120 | 5.98E-120 |
| Plcb3    | -3.53342 | 6.17E-120 | 3.07E-119 |
| Mta1     | -1.89598 | 8.53E-121 | 4.27E-120 |
| Egfl8    | -3.56063 | 3.67E-120 | 1.83E-119 |
| Rfk      | -1.47036 | 2.48E-121 | 1.24E-120 |
| Tal1     | -5.11319 | 2.62E-120 | 1.30E-119 |
| Il4ra    | -4.92697 | 1.99E-120 | 9.92E-120 |
| Selenof  | -0.65232 | 3.18E-122 | 1.61E-121 |
| Dennd5a  | -0.94078 | 5.20E-122 | 2.62E-121 |
| Slc12a2  | -1.38507 | 1.24E-121 | 6.24E-121 |
| Stat5b   | -2.79155 | 1.77E-121 | 8.87E-121 |
| Slc12a4  | -4.15422 | 4.98E-121 | 2.49E-120 |
| Arhgap6  | -3.39871 | 3.01E-121 | 1.51E-120 |
| Gltp     | -1.95594 | 4.98E-122 | 2.51E-121 |
| Zbtb46   | -2.71106 | 9.99E-122 | 5.04E-121 |
| Cdk14    | -2.74016 | 1.08E-121 | 5.46E-121 |
| Gm609    | -6.41161 | 3.64E-121 | 1.83E-120 |
| Cntn1    | -2.2552  | 6.59E-122 | 3.33E-121 |
| Maob     | -4.39441 | 1.35E-121 | 6.79E-121 |
| Il34     | -5.11483 | 1.35E-121 | 6.77E-121 |
| Cdh13    | -5.58387 | 1.05E-121 | 5.30E-121 |
| Septin10 | -2.25532 | 9.65E-123 | 4.91E-122 |



|          |          |           |           |
|----------|----------|-----------|-----------|
| Irag1    | -5.26849 | 5.59E-122 | 2.82E-121 |
| Stap2    | -5.02148 | 3.79E-122 | 1.92E-121 |
| Trim34a  | -4.99318 | 3.40E-122 | 1.72E-121 |
| Spred2   | -2.52063 | 5.32E-123 | 2.70E-122 |
| Tcf7l1   | -3.31187 | 7.56E-123 | 3.84E-122 |
| Fkbp7    | -2.56419 | 3.12E-123 | 1.59E-122 |
| Heyl     | -5.07096 | 1.18E-122 | 5.99E-122 |
| Gbp5     | -5.35053 | 1.32E-122 | 6.70E-122 |
| Tm9sf2   | -1.01049 | 3.67E-124 | 1.89E-123 |
| Gyg      | -2.48986 | 1.83E-123 | 9.35E-123 |
| Anxa4    | -3.82342 | 2.20E-123 | 1.12E-122 |
| Slc1a3   | -1.97863 | 1.08E-123 | 5.52E-123 |
| Irgm2    | -5.20557 | 2.25E-123 | 1.15E-122 |
| Mgat4b   | -2.77718 | 4.59E-124 | 2.35E-123 |
| Arpc5    | -1.07372 | 4.24E-125 | 2.19E-124 |
| Cd302    | -3.47151 | 4.45E-124 | 2.28E-123 |
| Itpril1  | -5.82035 | 1.17E-123 | 5.96E-123 |
| Lipe     | -2.29194 | 7.43E-125 | 3.83E-124 |
| Gpr160   | -4.83096 | 4.55E-124 | 2.33E-123 |
| Rin3     | -5.34751 | 5.14E-124 | 2.63E-123 |
| Chst15   | -5.34961 | 4.13E-124 | 2.12E-123 |
| Apod     | -4.43577 | 2.86E-124 | 1.47E-123 |
| Mall     | -5.12731 | 1.83E-124 | 9.39E-124 |
| Tle1     | -1.86091 | 1.67E-125 | 8.64E-125 |
| Smad1    | -1.27085 | 5.01E-126 | 2.60E-125 |
| Mtap     | -3.52738 | 2.30E-125 | 1.19E-124 |
| Cped1    | -4.42408 | 4.50E-125 | 2.32E-124 |
| Ldb2     | -3.78155 | 2.70E-125 | 1.40E-124 |
| Tmem88   | -5.33137 | 4.40E-125 | 2.27E-124 |
| Etv1     | -3.18891 | 1.62E-125 | 8.38E-125 |
| Nav2     | -3.10712 | 1.29E-125 | 6.67E-125 |
| Cpne2    | -4.74138 | 2.64E-125 | 1.36E-124 |
| Sox9     | -2.66403 | 1.44E-125 | 7.49E-125 |
| Abca8a   | -1.75287 | 3.06E-126 | 1.59E-125 |
| Ddit4l   | -3.86012 | 7.55E-126 | 3.92E-125 |
| Itga5    | -4.51898 | 4.04E-126 | 2.10E-125 |
| Gm15666  | -4.9745  | 4.51E-126 | 2.35E-125 |
| Plxdc1   | -4.76667 | 4.06E-126 | 2.11E-125 |
| Poglut3  | -5.23251 | 4.96E-126 | 2.58E-125 |
| Ocel1    | -1.92992 | 3.04E-127 | 1.59E-126 |
| Pald1    | -5.29213 | 3.66E-126 | 1.91E-125 |
| Atl3     | -1.35894 | 1.42E-127 | 7.44E-127 |
| Edn3     | -5.2769  | 2.71E-126 | 1.41E-125 |
| Tnks1bp1 | -1.96639 | 3.07E-127 | 1.61E-126 |
| Ctnnd1   | -1.26788 | 6.28E-128 | 3.30E-127 |
| H2-Q6    | -4.84497 | 1.13E-126 | 5.91E-126 |
| Uba52    | -0.73698 | 1.64E-128 | 8.64E-128 |

|           |          |           |           |
|-----------|----------|-----------|-----------|
| Anxa7     | -1.19223 | 7.94E-129 | 4.18E-128 |
| Arhgef28  | -3.86489 | 1.72E-127 | 9.00E-127 |
| Dynlt3    | -1.11674 | 5.87E-129 | 3.10E-128 |
| Acot9     | -3.53722 | 6.55E-128 | 3.44E-127 |
| Fam114a1  | -4.46908 | 9.54E-128 | 5.00E-127 |
| Calm3     | -0.83813 | 1.78E-129 | 9.45E-129 |
| Ifi44     | -6.42605 | 8.41E-128 | 4.41E-127 |
| Psd3      | -2.36899 | 7.79E-129 | 4.11E-128 |
| Slc44a2   | -2.13581 | 6.28E-129 | 3.31E-128 |
| Sncg      | -3.4456  | 1.88E-128 | 9.90E-128 |
| C230096K  | -4.2137  | 2.06E-128 | 1.08E-127 |
| Bcr       | -1.64048 | 1.90E-129 | 1.01E-128 |
| Rbms2     | -3.07797 | 6.80E-129 | 3.59E-128 |
| Amot      | -4.49248 | 1.04E-128 | 5.48E-128 |
| Nr4a2     | -4.16946 | 1.05E-128 | 5.53E-128 |
| Snhg18    | -1.8269  | 1.27E-129 | 6.74E-129 |
| Syt7      | -3.98691 | 4.36E-129 | 2.30E-128 |
| Gpr37     | -2.39708 | 2.24E-129 | 1.19E-128 |
| Srgap1    | -4.21684 | 4.56E-129 | 2.41E-128 |
| Btf3      | -0.62697 | 5.02E-131 | 2.69E-130 |
| Tor3a     | -4.57202 | 3.24E-129 | 1.71E-128 |
| Idh2      | -2.15248 | 1.74E-130 | 9.29E-130 |
| Rbp1      | -2.15975 | 4.08E-130 | 2.17E-129 |
| Slc29a1   | -2.95411 | 3.48E-130 | 1.85E-129 |
| Serpinb6b | -5.50344 | 1.03E-129 | 5.48E-129 |
| Nt5dc2    | -2.09859 | 1.44E-130 | 7.73E-130 |
| Rpl27     | -0.67285 | 9.46E-132 | 5.09E-131 |
| Irak2     | -3.33794 | 2.88E-130 | 1.54E-129 |
| Gimap8    | -5.01528 | 3.53E-130 | 1.88E-129 |
| Ica1      | -5.50935 | 4.34E-130 | 2.31E-129 |
| Helz2     | -4.69432 | 2.16E-130 | 1.15E-129 |
| Eml2      | -2.77337 | 2.48E-131 | 1.33E-130 |
| Triobp    | -2.37763 | 1.30E-131 | 6.96E-131 |
| Man1a     | -5.58458 | 1.01E-130 | 5.42E-130 |
| Mgat4a    | -4.33056 | 5.74E-131 | 3.07E-130 |
| Tmc7      | -5.46    | 5.44E-131 | 2.91E-130 |
| Pde3a     | -3.75952 | 2.37E-131 | 1.27E-130 |
| Rhoq      | -2.48594 | 5.03E-132 | 2.71E-131 |
| Il13ra1   | -5.29954 | 3.04E-131 | 1.63E-130 |
| Acsf5     | -2.0141  | 1.60E-132 | 8.64E-132 |
| Ap1s1     | -2.94962 | 4.25E-132 | 2.29E-131 |
| Ogfrl1    | -1.25296 | 3.24E-133 | 1.76E-132 |
| Plod1     | -2.03025 | 4.69E-133 | 2.54E-132 |
| Dgkz      | -2.32146 | 5.30E-133 | 2.87E-132 |
| Fam189a2  | -3.65944 | 1.55E-132 | 8.38E-132 |
| Rplp1     | -0.47524 | 2.20E-134 | 1.20E-133 |
| Sh3pxd2a  | -4.24493 | 1.48E-132 | 8.01E-132 |

|         |          |           |           |
|---------|----------|-----------|-----------|
| Pde4b   | -2.49716 | 3.46E-133 | 1.87E-132 |
| Acyp2   | -1.98192 | 2.26E-133 | 1.22E-132 |
| Brk1    | -0.93503 | 2.07E-134 | 1.13E-133 |
| Itpr2   | -1.62264 | 4.07E-134 | 2.22E-133 |
| Ace2    | -5.38457 | 3.32E-133 | 1.80E-132 |
| Prkar2b | -3.93098 | 9.33E-134 | 5.07E-133 |
| Slc38a5 | -5.75044 | 2.33E-133 | 1.26E-132 |
| Dysf    | -5.27008 | 1.76E-133 | 9.52E-133 |
| Il1r1   | -4.62117 | 1.01E-133 | 5.47E-133 |
| Agpat4  | -4.74257 | 8.06E-134 | 4.38E-133 |
| Pdlim2  | -5.22144 | 9.26E-134 | 5.03E-133 |
| Sqor    | -5.79384 | 1.01E-133 | 5.49E-133 |
| Ifi47   | -5.22165 | 5.33E-134 | 2.90E-133 |
| Sema5a  | -2.75793 | 1.39E-134 | 7.60E-134 |
| Bambi   | -2.75983 | 6.60E-135 | 3.61E-134 |
| Thra    | -0.87987 | 2.22E-136 | 1.22E-135 |
| Pdgfd   | -5.97289 | 2.11E-134 | 1.15E-133 |
| Vcam1   | -4.05386 | 7.61E-135 | 4.15E-134 |
| Ctdsp1  | -1.62805 | 2.66E-136 | 1.46E-135 |
| Pard3b  | -3.66926 | 2.11E-135 | 1.16E-134 |
| Litaf   | -3.91594 | 2.14E-135 | 1.17E-134 |
| Arid5a  | -3.93982 | 2.49E-135 | 1.36E-134 |
| Ctsc    | -4.22122 | 2.29E-135 | 1.25E-134 |
| Zyx     | -3.99538 | 1.02E-135 | 5.61E-135 |
| Rab2a   | -0.83977 | 1.92E-137 | 1.06E-136 |
| Prkd2   | -2.80007 | 3.38E-136 | 1.86E-135 |
| Zfp467  | -2.01888 | 6.81E-137 | 3.76E-136 |
| Trim12c | -4.45976 | 1.64E-136 | 9.06E-136 |
| Stx4a   | -1.58259 | 5.41E-138 | 3.00E-137 |
| Git2    | -1.0297  | 1.74E-138 | 9.66E-138 |
| Klhl6   | -5.90143 | 1.39E-136 | 7.67E-136 |
| Plcb4   | -1.12257 | 8.53E-139 | 4.75E-138 |
| Ppp2r5a | -1.08795 | 8.87E-139 | 4.94E-138 |
| Cachd1  | -4.59381 | 2.46E-137 | 1.36E-136 |
| Ggt5    | -5.33475 | 2.77E-137 | 1.53E-136 |
| Acacb   | -4.27837 | 1.40E-137 | 7.76E-137 |
| Rnf152  | -3.15172 | 5.60E-138 | 3.11E-137 |
| Gm13861 | -4.48242 | 9.95E-138 | 5.52E-137 |
| Gnaq    | -1.01824 | 2.06E-139 | 1.15E-138 |
| H2-M3   | -5.28904 | 1.11E-137 | 6.13E-137 |
| Rarg    | -3.09491 | 1.63E-138 | 9.08E-138 |
| Nod1    | -4.46933 | 3.89E-138 | 2.16E-137 |
| Syde1   | -4.25205 | 3.32E-138 | 1.84E-137 |
| Wipf1   | -4.1982  | 1.03E-138 | 5.76E-138 |
| Gprc5c  | -4.29582 | 6.59E-139 | 3.67E-138 |
| Eef2    | -0.6263  | 4.22E-141 | 2.38E-140 |
| Myh11   | -4.36166 | 6.89E-139 | 3.84E-138 |

|          |          |           |           |
|----------|----------|-----------|-----------|
| Dgkb     | -2.80144 | 1.78E-139 | 9.93E-139 |
| Sfxn5    | -1.9977  | 7.11E-140 | 3.98E-139 |
| Vstm4    | -4.65967 | 4.06E-139 | 2.27E-138 |
| Npepl1   | -2.56133 | 4.55E-140 | 2.55E-139 |
| Car14    | -2.20125 | 7.28E-140 | 4.08E-139 |
| Lrrc32   | -4.91016 | 2.52E-139 | 1.40E-138 |
| Spr      | -1.31022 | 2.62E-141 | 1.48E-140 |
| Lhx2     | -2.08949 | 1.83E-140 | 1.03E-139 |
| Cdkn1c   | -1.45632 | 1.51E-141 | 8.55E-141 |
| Rasd1    | -4.71957 | 2.62E-140 | 1.47E-139 |
| Ccrl2    | -4.8596  | 1.99E-140 | 1.12E-139 |
| Fat4     | -4.8058  | 1.55E-140 | 8.72E-140 |
| Sod3     | -5.02267 | 1.38E-140 | 7.75E-140 |
| Tes      | -3.75413 | 5.73E-141 | 3.23E-140 |
| Rgl1     | -1.74196 | 4.69E-142 | 2.66E-141 |
| Cd24a    | -3.8287  | 9.34E-142 | 5.29E-141 |
| Ppm1f    | -2.74064 | 2.93E-142 | 1.66E-141 |
| Rap1b    | -0.96825 | 1.11E-143 | 6.33E-143 |
| Pid1     | -2.03049 | 1.06E-142 | 6.03E-142 |
| Naca     | -0.60702 | 4.32E-144 | 2.47E-143 |
| N4bp3    | -1.9657  | 4.03E-143 | 2.29E-142 |
| Serpine2 | -5.17705 | 8.50E-142 | 4.81E-141 |
| Rps7     | -0.61145 | 1.93E-144 | 1.11E-143 |
| Npc2     | -1.18691 | 6.21E-144 | 3.55E-143 |
| Lcp1     | -5.26569 | 3.62E-142 | 2.05E-141 |
| Prelp    | -3.44643 | 7.07E-143 | 4.02E-142 |
| Gm13889  | -2.7417  | 1.70E-143 | 9.67E-143 |
| Stat3    | -1.29339 | 1.13E-144 | 6.52E-144 |
| Insr     | -1.11613 | 9.52E-145 | 5.46E-144 |
| Hyal2    | -3.14069 | 1.01E-143 | 5.75E-143 |
| Rusc1    | -4.49456 | 2.28E-143 | 1.30E-142 |
| Magt1    | -1.72403 | 1.15E-144 | 6.60E-144 |
| Rps27l   | -0.94268 | 1.94E-145 | 1.12E-144 |
| Flii     | -1.56174 | 4.57E-145 | 2.63E-144 |
| Slc25a24 | -5.63883 | 1.44E-143 | 8.21E-143 |
| Ldlr     | -4.28299 | 6.00E-144 | 3.43E-143 |
| Qdpr     | -1.65913 | 4.08E-145 | 2.35E-144 |
| Agfg1    | -1.13402 | 9.67E-146 | 5.59E-145 |
| Uqcr11   | -0.71688 | 4.10E-146 | 2.37E-145 |
| Dennd3   | -4.52933 | 5.08E-144 | 2.91E-143 |
| Aoc3     | -5.10096 | 6.88E-144 | 3.92E-143 |
| Parp9    | -4.29606 | 2.00E-144 | 1.15E-143 |
| Cat      | -2.29138 | 2.07E-145 | 1.19E-144 |
| Dnaja1   | -0.94634 | 1.44E-146 | 8.35E-146 |
| Phldb1   | -4.23497 | 8.76E-145 | 5.03E-144 |
| Pxdc1    | -5.0873  | 3.68E-145 | 2.12E-144 |
| Dtx3l    | -4.57689 | 2.75E-145 | 1.59E-144 |

|          |          |           |           |
|----------|----------|-----------|-----------|
| Capza2   | -0.88814 | 1.80E-147 | 1.05E-146 |
| Mt1      | -1.45866 | 6.85E-147 | 3.99E-146 |
| Rnh1     | -1.47148 | 2.34E-147 | 1.37E-146 |
| Cmpk2    | -4.23076 | 7.72E-146 | 4.46E-145 |
| Rab12    | -1.18263 | 4.72E-148 | 2.76E-147 |
| Bok      | -2.52703 | 3.62E-147 | 2.11E-146 |
| Espn     | -1.84073 | 3.44E-147 | 2.00E-146 |
| mt-Atp6  | -0.92616 | 2.24E-148 | 1.31E-147 |
| Caskin2  | -1.84816 | 1.09E-147 | 6.36E-147 |
| Gm38197  | -7.39193 | 3.17E-146 | 1.84E-145 |
| Atp2a3   | -4.29363 | 1.04E-146 | 6.04E-146 |
| Magi3    | -1.62379 | 5.24E-148 | 3.06E-147 |
| Ifit3    | -4.39093 | 8.79E-147 | 5.12E-146 |
| Tbrg1    | -1.43663 | 1.97E-149 | 1.16E-148 |
| Asap2    | -2.48454 | 9.08E-149 | 5.33E-148 |
| Ankrd50  | -2.45537 | 1.00E-148 | 5.87E-148 |
| Ccdc85a  | -3.40661 | 1.25E-148 | 7.35E-148 |
| Ildr2    | -2.85369 | 5.78E-149 | 3.40E-148 |
| Gm37393  | -7.59979 | 2.96E-148 | 1.73E-147 |
| Ptprj    | -4.8226  | 1.15E-148 | 6.73E-148 |
| Tbkbp1   | -4.18659 | 5.74E-149 | 3.37E-148 |
| Krtcap2  | -0.92485 | 3.05E-151 | 1.81E-150 |
| Slc38a2  | -1.0341  | 2.56E-151 | 1.52E-150 |
| Fgfr1    | -3.37493 | 8.73E-150 | 5.16E-149 |
| Car4     | -4.53905 | 1.29E-149 | 7.58E-149 |
| Tkt      | -1.64928 | 1.80E-151 | 1.07E-150 |
| Cers5    | -2.15206 | 2.05E-151 | 1.22E-150 |
| Ddx58    | -3.00018 | 3.29E-151 | 1.95E-150 |
| Lamc3    | -5.62915 | 2.26E-150 | 1.34E-149 |
| H1f0     | -1.37024 | 1.66E-152 | 9.95E-152 |
| Ankrd13a | -1.7761  | 3.15E-152 | 1.89E-151 |
| Tpst2    | -2.17108 | 5.27E-152 | 3.15E-151 |
| Sertad1  | -2.53761 | 4.80E-152 | 2.87E-151 |
| Gm2a     | -3.43099 | 1.89E-151 | 1.12E-150 |
| H2-Q7    | -4.02223 | 1.06E-151 | 6.34E-151 |
| Ophn1    | -3.34515 | 7.22E-152 | 4.31E-151 |
| Tuba1a   | -0.77263 | 4.86E-154 | 2.93E-153 |
| H2-T22   | -4.22351 | 5.19E-152 | 3.10E-151 |
| Aqp4     | -2.20624 | 2.66E-152 | 1.60E-151 |
| Serping1 | -4.32484 | 5.77E-152 | 3.44E-151 |
| Mill2    | -5.75808 | 4.46E-152 | 2.67E-151 |
| Lama2    | -5.40796 | 4.68E-152 | 2.80E-151 |
| Chst11   | -5.96221 | 4.72E-152 | 2.82E-151 |
| Tubb4b   | -1.05429 | 1.34E-154 | 8.12E-154 |
| Chst2    | -2.3531  | 9.97E-154 | 6.01E-153 |
| S100a6   | -2.09367 | 1.71E-154 | 1.03E-153 |
| Igtp     | -4.51973 | 4.65E-154 | 2.81E-153 |

|          |          |           |           |
|----------|----------|-----------|-----------|
| Rpl29    | -0.65134 | 1.28E-156 | 7.83E-156 |
| Fxyd6    | -1.81291 | 2.98E-155 | 1.81E-154 |
| Al467606 | -5.17963 | 3.54E-154 | 2.14E-153 |
| Rnf103   | -1.52264 | 4.06E-156 | 2.47E-155 |
| Trim16   | -5.4615  | 2.09E-154 | 1.26E-153 |
| Tspan4   | -1.96694 | 4.49E-156 | 2.73E-155 |
| Rtl8a    | -1.61182 | 1.57E-156 | 9.61E-156 |
| Samd12   | -4.49381 | 3.96E-155 | 2.40E-154 |
| Tnfrsf21 | -4.28496 | 2.89E-155 | 1.76E-154 |
| Nedd4    | -0.73097 | 5.48E-158 | 3.37E-157 |
| Plekhg2  | -3.562   | 7.89E-156 | 4.80E-155 |
| Itih5    | -5.38577 | 2.56E-155 | 1.56E-154 |
| Rps6     | -0.73562 | 4.00E-158 | 2.46E-157 |
| Perp     | -4.95313 | 5.17E-156 | 3.15E-155 |
| Gstt2    | -2.78604 | 3.86E-157 | 2.36E-156 |
| Rcn1     | -3.40805 | 5.79E-157 | 3.54E-156 |
| Tmem51   | -5.15622 | 1.64E-156 | 1.00E-155 |
| Atp6v1f  | -0.92382 | 2.42E-159 | 1.50E-158 |
| Ltbr     | -4.58879 | 3.93E-157 | 2.40E-156 |
| Gpc3     | -4.04324 | 2.00E-157 | 1.23E-156 |
| Ldlrap1  | -4.56908 | 7.61E-158 | 4.68E-157 |
| Suc1g2   | -3.62733 | 5.11E-158 | 3.14E-157 |
| Frmd4a   | -3.86096 | 4.01E-158 | 2.47E-157 |
| Nfe2l2   | -1.45297 | 9.27E-160 | 5.77E-159 |
| Rel1     | -2.5427  | 6.37E-159 | 3.94E-158 |
| Stab1    | -5.10962 | 1.05E-157 | 6.47E-157 |
| Def6     | -5.59002 | 1.00E-157 | 6.17E-157 |
| Hic1     | -5.03444 | 8.33E-158 | 5.11E-157 |
| Spata13  | -3.68717 | 1.65E-158 | 1.02E-157 |
| Slc38a11 | -5.44857 | 2.31E-158 | 1.43E-157 |
| Ggta1    | -5.23812 | 2.89E-158 | 1.78E-157 |
| Cebpb    | -3.1227  | 4.29E-159 | 2.66E-158 |
| Lxn      | -5.02259 | 1.46E-158 | 8.99E-158 |
| Dapl1    | -1.52805 | 2.59E-160 | 1.62E-159 |
| Tax1bp3  | -2.58759 | 6.10E-160 | 3.80E-159 |
| Basp1    | -2.14692 | 5.29E-160 | 3.30E-159 |
| Daam2    | -4.91782 | 3.34E-159 | 2.07E-158 |
| Rilpl1   | -2.67346 | 5.35E-160 | 3.33E-159 |
| Anxa1    | -3.63662 | 1.36E-159 | 8.44E-159 |
| Etl4     | -4.65592 | 2.41E-159 | 1.49E-158 |
| Irgm1    | -4.47787 | 1.43E-159 | 8.88E-159 |
| Niban1   | -5.71006 | 3.71E-159 | 2.30E-158 |
| Fmnl2    | -3.16686 | 5.53E-160 | 3.44E-159 |
| Lmcd1    | -4.90191 | 8.78E-160 | 5.47E-159 |
| Ass1     | -2.73286 | 2.02E-160 | 1.26E-159 |
| Gimap5   | -5.9528  | 1.18E-159 | 7.35E-159 |
| Atp2b4   | -3.0909  | 7.55E-161 | 4.73E-160 |

|          |          |           |           |
|----------|----------|-----------|-----------|
| Prrg1    | -5.10205 | 1.03E-160 | 6.43E-160 |
| Prrt4    | -4.84267 | 8.19E-161 | 5.14E-160 |
| Syngn2   | -2.62288 | 5.48E-162 | 3.45E-161 |
| Slc39a1  | -2.36879 | 2.41E-162 | 1.53E-161 |
| Elovl1   | -3.85083 | 7.52E-162 | 4.73E-161 |
| Gpc6     | -4.49077 | 1.30E-161 | 8.20E-161 |
| Rpl8     | -0.56933 | 1.03E-164 | 6.56E-164 |
| Stat6    | -4.87703 | 1.07E-161 | 6.75E-161 |
| Efemp2   | -3.37909 | 3.39E-162 | 2.14E-161 |
| Tap2     | -2.27126 | 4.09E-163 | 2.59E-162 |
| Crot     | -2.05634 | 7.75E-163 | 4.90E-162 |
| Map4k4   | -1.21035 | 2.60E-164 | 1.66E-163 |
| Vangl1   | -5.35922 | 2.63E-162 | 1.66E-161 |
| Garre1   | -0.90836 | 2.71E-165 | 1.73E-164 |
| Fstl1    | -4.07608 | 5.28E-163 | 3.34E-162 |
| Dap      | -2.79577 | 5.87E-164 | 3.74E-163 |
| Rpl15    | -0.83779 | 6.57E-166 | 4.22E-165 |
| Sptan1   | -0.89703 | 3.95E-166 | 2.54E-165 |
| Fam181b  | -4.9628  | 1.61E-163 | 1.02E-162 |
| Adamts10 | -4.49377 | 6.81E-164 | 4.33E-163 |
| Acvr1    | -4.1471  | 6.46E-164 | 4.11E-163 |
| Parp12   | -4.05241 | 4.25E-164 | 2.71E-163 |
| Klf10    | -2.58795 | 8.43E-166 | 5.40E-165 |
| Vwa5a    | -3.95771 | 5.38E-165 | 3.43E-164 |
| Ednra    | -4.94375 | 5.22E-165 | 3.33E-164 |
| Ctso     | -2.16682 | 2.33E-166 | 1.50E-165 |
| Lrrn3    | -4.58489 | 3.84E-165 | 2.45E-164 |
| Adgrl3   | -3.39078 | 6.06E-166 | 3.89E-165 |
| Baiap2   | -3.15507 | 3.33E-166 | 2.15E-165 |
| Emp3     | -4.82723 | 1.78E-165 | 1.14E-164 |
| Eln      | -4.76957 | 1.61E-165 | 1.03E-164 |
| Pde4d    | -4.83086 | 6.55E-166 | 4.21E-165 |
| Adipor2  | -1.24745 | 7.49E-169 | 4.87E-168 |
| Castor1  | -4.23034 | 8.27E-167 | 5.34E-166 |
| Klf11    | -5.01373 | 1.39E-166 | 8.99E-166 |
| Megf6    | -5.21493 | 9.20E-167 | 5.94E-166 |
| Osbp19   | -1.33661 | 2.40E-169 | 1.57E-168 |
| Ppp1r14b | -2.5293  | 2.52E-168 | 1.64E-167 |
| Naalad2  | -4.63458 | 1.91E-167 | 1.24E-166 |
| Dennd5b  | -1.50283 | 1.01E-169 | 6.60E-169 |
| Lrp10    | -1.82999 | 5.06E-170 | 3.31E-169 |
| Arhgap27 | -4.22172 | 6.44E-169 | 4.19E-168 |
| Flvcr2   | -5.84824 | 1.44E-168 | 9.33E-168 |
| Cx3cl1   | -4.35528 | 3.06E-169 | 1.99E-168 |
| Tspan9   | -2.59933 | 5.54E-170 | 3.63E-169 |
| Ehbp11   | -3.63605 | 1.57E-169 | 1.02E-168 |
| Rpl22    | -0.66233 | 3.72E-172 | 2.46E-171 |

|           |          |           |           |
|-----------|----------|-----------|-----------|
| Chn2      | -3.14493 | 8.82E-170 | 5.76E-169 |
| Arl2bp    | -1.13554 | 1.27E-171 | 8.38E-171 |
| Gbp4      | -5.19387 | 5.25E-169 | 3.42E-168 |
| Usp25     | -1.50015 | 2.78E-171 | 1.83E-170 |
| Sgms2     | -4.8742  | 2.97E-169 | 1.93E-168 |
| Gm20559   | -4.93046 | 1.85E-169 | 1.21E-168 |
| Trpm3     | -2.16507 | 1.53E-170 | 1.01E-169 |
| Ntn4      | -4.08149 | 6.47E-170 | 4.24E-169 |
| Aplp2     | -0.70016 | 3.96E-173 | 2.63E-172 |
| Arhgef5   | -5.14012 | 4.72E-170 | 3.09E-169 |
| Adcy4     | -5.05904 | 1.55E-171 | 1.02E-170 |
| Tnfaip8   | -2.87142 | 1.33E-172 | 8.83E-172 |
| Rps8      | -0.559   | 5.50E-176 | 3.71E-175 |
| Mknk2     | -2.6109  | 5.54E-174 | 3.69E-173 |
| Gpx8      | -3.53575 | 2.69E-173 | 1.79E-172 |
| Ninj1     | -3.05953 | 1.33E-173 | 8.88E-173 |
| Arhgap23  | -4.03146 | 1.77E-173 | 1.18E-172 |
| Twf2      | -3.27157 | 1.71E-174 | 1.14E-173 |
| Tbx2      | -3.45443 | 2.30E-174 | 1.53E-173 |
| Gadd45g   | -2.5233  | 5.70E-175 | 3.82E-174 |
| Rapgef3   | -4.61235 | 1.53E-174 | 1.02E-173 |
| Zic1      | -4.35502 | 9.07E-175 | 6.08E-174 |
| Arl15     | -1.87048 | 1.13E-176 | 7.64E-176 |
| Tprgl     | -1.16388 | 1.03E-177 | 7.03E-177 |
| Rpl7      | -0.67578 | 1.16E-178 | 7.89E-178 |
| Rpl5      | -0.76314 | 1.23E-178 | 8.36E-178 |
| Rsad2     | -6.04851 | 3.53E-175 | 2.37E-174 |
| Cap1      | -1.58244 | 6.46E-178 | 4.39E-177 |
| Il17rd    | -5.46876 | 2.10E-175 | 1.41E-174 |
| Nmi       | -4.274   | 5.77E-176 | 3.89E-175 |
| Sox7      | -5.32251 | 5.67E-176 | 3.82E-175 |
| Usp46     | -2.34555 | 1.37E-177 | 9.32E-177 |
| Prkg1     | -2.83137 | 4.52E-177 | 3.06E-176 |
| Rbm3      | -0.91844 | 1.04E-179 | 7.15E-179 |
| Foxo1     | -1.67397 | 1.32E-178 | 8.97E-178 |
| Lyn       | -4.72549 | 1.49E-176 | 1.01E-175 |
| B430010I2 | -3.71867 | 4.99E-177 | 3.38E-176 |
| Abrac1    | -4.11328 | 8.24E-178 | 5.60E-177 |
| Bag3      | -4.69757 | 1.94E-177 | 1.32E-176 |
| Arhgap18  | -4.6457  | 1.05E-177 | 7.10E-177 |
| A530083IV | -6.90051 | 2.31E-177 | 1.57E-176 |
| Trio      | -2.67273 | 4.26E-179 | 2.91E-178 |
| Gbp2      | -5.16017 | 7.68E-178 | 5.22E-177 |
| Arhgap20  | -5.7159  | 7.11E-178 | 4.83E-177 |
| Lsamp     | -3.093   | 3.76E-179 | 2.58E-178 |
| Cdc42ep1  | -4.1054  | 1.30E-178 | 8.87E-178 |
| Smtn      | -4.12927 | 4.13E-179 | 2.82E-178 |



|          |          |           |           |
|----------|----------|-----------|-----------|
| 2310022B | -2.40119 | 3.44E-180 | 2.36E-179 |
| Vcl      | -1.52838 | 1.07E-181 | 7.38E-181 |
| Cd248    | -5.40437 | 2.96E-179 | 2.02E-178 |
| Bnip3l   | -0.94901 | 7.07E-183 | 4.90E-182 |
| Nckap1   | -1.28042 | 3.03E-182 | 2.09E-181 |
| Rapgef2  | -1.50751 | 4.08E-182 | 2.82E-181 |
| Fam171a1 | -4.54433 | 7.45E-181 | 5.12E-180 |
| Sorbs1   | -1.72733 | 3.91E-183 | 2.71E-182 |
| Lrrk1    | -5.05754 | 1.37E-181 | 9.46E-181 |
| Tspan14  | -3.54851 | 3.23E-182 | 2.23E-181 |
| Slc52a3  | -5.07336 | 6.48E-182 | 4.46E-181 |
| Mir99ahg | -3.71076 | 1.30E-182 | 8.98E-182 |
| Il6st    | -1.55042 | 1.93E-184 | 1.35E-183 |
| Csnk1e   | -1.57409 | 3.28E-185 | 2.30E-184 |
| Cenpb    | -1.40124 | 1.40E-185 | 9.82E-185 |
| Slc25a1  | -3.93589 | 2.37E-183 | 1.65E-182 |
| Amotl2   | -1.77926 | 3.25E-185 | 2.28E-184 |
| Map7d1   | -1.56852 | 5.98E-186 | 4.21E-185 |
| Ano1     | -5.07746 | 2.43E-183 | 1.69E-182 |
| Pttg1ip  | -1.2654  | 1.21E-186 | 8.57E-186 |
| Tnfaip1  | -1.42898 | 1.67E-186 | 1.18E-185 |
| Sult1a1  | -3.30694 | 9.29E-185 | 6.49E-184 |
| Tcim     | -4.86255 | 2.37E-184 | 1.65E-183 |
| Casp8    | -4.91765 | 2.14E-184 | 1.49E-183 |
| Tmem176i | -4.15736 | 4.30E-185 | 3.01E-184 |
| Cd47     | -1.05001 | 2.75E-188 | 1.96E-187 |
| Smim14   | -1.15275 | 2.54E-188 | 1.81E-187 |
| Man2a1   | -4.92499 | 3.08E-185 | 2.16E-184 |
| Rps25    | -0.67279 | 1.72E-189 | 1.23E-188 |
| Trim30a  | -5.79441 | 1.83E-185 | 1.29E-184 |
| Socs2    | -4.80467 | 6.53E-186 | 4.59E-185 |
| Tmem44   | -4.57529 | 7.15E-186 | 5.03E-185 |
| Rcsd1    | -4.73867 | 6.86E-186 | 4.82E-185 |
| Fez2     | -2.09945 | 7.77E-188 | 5.52E-187 |
| Nkd1     | -3.21652 | 2.73E-187 | 1.93E-186 |
| Foxl2    | -5.27603 | 1.44E-186 | 1.01E-185 |
| Slco3a1  | -4.36482 | 5.13E-187 | 3.63E-186 |
| Sfxn1    | -3.90272 | 2.78E-187 | 1.97E-186 |
| Vsir     | -5.76748 | 1.25E-186 | 8.83E-186 |
| Tle3     | -3.56104 | 6.89E-188 | 4.90E-187 |
| Arhgef10 | -3.74982 | 1.06E-187 | 7.54E-187 |
| Actg1    | -0.70934 | 2.85E-191 | 2.05E-190 |
| Zfand3   | -2.19035 | 2.11E-189 | 1.51E-188 |
| Gper1    | -4.9566  | 1.11E-187 | 7.88E-187 |
| Ecm2     | -5.27592 | 3.48E-188 | 2.48E-187 |
| Slc35f2  | -5.89047 | 2.68E-188 | 1.91E-187 |
| Fbxl7    | -6.59066 | 8.39E-189 | 5.99E-188 |

|          |          |           |           |
|----------|----------|-----------|-----------|
| Art3     | -5.54662 | 5.12E-189 | 3.66E-188 |
| Gpm6a    | -2.58054 | 2.05E-190 | 1.47E-189 |
| Pdgfa    | -2.88507 | 7.70E-191 | 5.54E-190 |
| Uchl1    | -3.20331 | 1.10E-191 | 7.93E-191 |
| Stard4   | -3.39383 | 7.22E-192 | 5.21E-191 |
| Itgb5    | -2.68025 | 3.53E-192 | 2.55E-191 |
| Trim12a  | -4.69655 | 1.33E-191 | 9.62E-191 |
| Hey1     | -3.29077 | 2.27E-192 | 1.65E-191 |
| Gm42892  | -6.20728 | 1.82E-191 | 1.31E-190 |
| Colec12  | -4.38729 | 2.39E-192 | 1.73E-191 |
| Tpm2     | -4.1797  | 1.93E-192 | 1.40E-191 |
| St8sia6  | -5.70562 | 3.20E-192 | 2.32E-191 |
| Adap2    | -5.61969 | 2.45E-192 | 1.77E-191 |
| Rps13    | -0.69617 | 2.71E-197 | 2.00E-196 |
| Chd3     | -1.70109 | 5.09E-196 | 3.73E-195 |
| Zcchc24  | -4.16606 | 1.34E-193 | 9.76E-193 |
| Maml2    | -4.10461 | 8.22E-194 | 5.98E-193 |
| Gab1     | -2.65933 | 5.85E-195 | 4.27E-194 |
| Endod1   | -2.27531 | 1.44E-195 | 1.05E-194 |
| Tmem65   | -3.39767 | 4.77E-195 | 3.48E-194 |
| Mertk    | -4.49546 | 4.72E-194 | 3.44E-193 |
| Angptl4  | -4.9073  | 2.46E-194 | 1.79E-193 |
| Mindy1   | -1.84547 | 6.45E-197 | 4.74E-196 |
| Nacc2    | -3.12798 | 1.50E-195 | 1.10E-194 |
| Ppp1r14a | -5.03796 | 8.53E-195 | 6.22E-194 |
| Irx5     | -4.20306 | 1.48E-195 | 1.08E-194 |
| Snx3     | -0.98418 | 1.92E-199 | 1.43E-198 |
| Rps18    | -0.73519 | 4.98E-200 | 3.71E-199 |
| Hhex     | -5.60761 | 5.44E-196 | 3.98E-195 |
| Tgfb1i1  | -4.48362 | 1.55E-196 | 1.14E-195 |
| Elovl5   | -3.4523  | 6.27E-197 | 4.60E-196 |
| Lgals3bp | -4.24391 | 9.36E-197 | 6.86E-196 |
| Sem1     | -0.89864 | 9.09E-201 | 6.82E-200 |
| Pbxip1   | -2.18031 | 2.44E-198 | 1.81E-197 |
| Etfb     | -1.66425 | 2.24E-199 | 1.67E-198 |
| Elmo1    | -4.35029 | 3.08E-197 | 2.26E-196 |
| Elf1     | -2.14645 | 3.49E-199 | 2.59E-198 |
| Itpr3    | -4.84191 | 3.94E-197 | 2.90E-196 |
| Gsta4    | -2.35454 | 1.39E-198 | 1.03E-197 |
| Tcf7l2   | -2.58902 | 1.07E-198 | 7.95E-198 |
| Ifih1    | -4.44278 | 1.23E-197 | 9.09E-197 |
| Rpl14    | -0.75096 | 3.66E-202 | 2.77E-201 |
| Calu     | -1.6242  | 9.63E-201 | 7.23E-200 |
| Axl      | -4.36492 | 3.18E-198 | 2.35E-197 |
| Zc3hav1  | -4.18602 | 1.15E-198 | 8.52E-198 |
| Tapbp    | -1.47836 | 3.97E-201 | 2.99E-200 |
| Tmem98   | -3.65709 | 3.77E-199 | 2.81E-198 |

|          |          |           |           |
|----------|----------|-----------|-----------|
| Capzb    | -1.20207 | 7.06E-202 | 5.34E-201 |
| Slc16a4  | -4.31499 | 1.03E-198 | 7.68E-198 |
| Plscr3   | -3.89956 | 4.58E-199 | 3.41E-198 |
| Sipa1l1  | -2.7678  | 8.89E-200 | 6.63E-199 |
| Pdxk     | -1.83207 | 5.16E-202 | 3.90E-201 |
| Ncald    | -2.64211 | 1.73E-200 | 1.29E-199 |
| Sorbs3   | -3.7023  | 4.30E-200 | 3.21E-199 |
| Ppp1r9b  | -2.56367 | 6.25E-201 | 4.70E-200 |
| Lzts2    | -3.03795 | 3.89E-201 | 2.93E-200 |
| Rassf4   | -3.4879  | 4.60E-201 | 3.46E-200 |
| Galnt15  | -5.67547 | 1.51E-200 | 1.13E-199 |
| Myct1    | -5.77992 | 9.78E-201 | 7.34E-200 |
| Golm1    | -4.28454 | 3.17E-201 | 2.39E-200 |
| Pgm5     | -4.92796 | 1.56E-201 | 1.18E-200 |
| Rpl30    | -0.67773 | 9.76E-207 | 7.52E-206 |
| Inka1    | -5.64863 | 1.08E-201 | 8.14E-201 |
| Stmn2    | -3.91037 | 1.54E-202 | 1.17E-201 |
| Ccnd1    | -2.32105 | 2.77E-204 | 2.12E-203 |
| Ccser2   | -1.40476 | 1.15E-206 | 8.88E-206 |
| Tmtc1    | -4.59247 | 9.72E-204 | 7.41E-203 |
| Prr5l    | -4.88818 | 5.78E-204 | 4.41E-203 |
| Net1     | -2.44314 | 8.32E-206 | 6.39E-205 |
| Pcdh18   | -5.06185 | 2.80E-204 | 2.14E-203 |
| Rpl23a   | -0.84544 | 5.45E-209 | 4.24E-208 |
| Nxn      | -2.96155 | 6.00E-206 | 4.61E-205 |
| Plin3    | -3.62347 | 1.58E-205 | 1.21E-204 |
| Orai1    | -2.51579 | 4.73E-207 | 3.65E-206 |
| Lgals1   | -2.64252 | 8.89E-207 | 6.86E-206 |
| Clec1a   | -6.4101  | 5.24E-205 | 4.01E-204 |
| Pakap-2  | -7.51637 | 5.62E-205 | 4.30E-204 |
| Lrch1    | -4.77744 | 5.45E-206 | 4.19E-205 |
| Fosl2    | -5.19865 | 9.93E-206 | 7.62E-205 |
| Sppl2a   | -1.40538 | 9.41E-210 | 7.34E-209 |
| Ilgp1    | -6.36565 | 9.47E-206 | 7.27E-205 |
| Marveld1 | -4.98778 | 3.22E-206 | 2.48E-205 |
| Nr4a1    | -2.75297 | 2.79E-207 | 2.16E-206 |
| Mfng     | -4.37195 | 6.07E-207 | 4.68E-206 |
| Plekhg5  | -3.35271 | 3.39E-208 | 2.63E-207 |
| Glud1    | -1.55497 | 1.21E-210 | 9.46E-210 |
| Septin8  | -1.98253 | 5.81E-210 | 4.54E-209 |
| Ccny     | -1.41436 | 4.53E-211 | 3.57E-210 |
| Myo1d    | -4.37914 | 7.59E-208 | 5.88E-207 |
| Eci2     | -2.00927 | 1.13E-210 | 8.88E-210 |
| Hivep2   | -3.66267 | 1.39E-209 | 1.08E-208 |
| Lamp1    | -1.05484 | 3.19E-213 | 2.53E-212 |
| Ccdc50   | -1.72382 | 2.47E-212 | 1.96E-211 |
| Scarf1   | -4.66121 | 2.25E-209 | 1.75E-208 |

|         |          |           |           |
|---------|----------|-----------|-----------|
| Erc1    | -3.93723 | 1.25E-209 | 9.75E-209 |
| Ifitm1  | -4.32452 | 2.73E-210 | 2.14E-209 |
| Pkd2    | -2.26223 | 2.73E-212 | 2.16E-211 |
| Ctdspl  | -4.56654 | 1.10E-210 | 8.63E-210 |
| Lrp5    | -4.54464 | 7.46E-211 | 5.86E-210 |
| Sod1    | -1.09811 | 4.07E-215 | 3.26E-214 |
| Unc45b  | -5.40496 | 8.42E-211 | 6.62E-210 |
| Eif2ak2 | -4.8651  | 5.19E-211 | 4.09E-210 |
| Rnf213  | -4.08175 | 7.88E-212 | 6.22E-211 |
| Dbp     | -1.85345 | 4.35E-214 | 3.47E-213 |
| Gbp9    | -5.86817 | 2.36E-211 | 1.86E-210 |
| Rps15a  | -0.7187  | 5.88E-217 | 4.73E-216 |
| Sgpp2   | -3.92824 | 3.88E-212 | 3.06E-211 |
| Yap1    | -3.43742 | 6.16E-213 | 4.89E-212 |
| Ndnf    | -3.27538 | 8.29E-213 | 6.57E-212 |
| Prdx4   | -2.53267 | 1.15E-214 | 9.17E-214 |
| Ckap4   | -3.34854 | 3.26E-215 | 2.62E-214 |
| Sema3g  | -4.94159 | 1.54E-214 | 1.23E-213 |
| Arl6ip5 | -1.38403 | 6.17E-219 | 5.00E-218 |
| Rps3    | -0.7094  | 4.49E-221 | 3.66E-220 |
| Myadm   | -5.25239 | 1.94E-216 | 1.56E-215 |
| Prdm16  | -4.98283 | 1.28E-216 | 1.03E-215 |
| Aif1l   | -3.84267 | 2.40E-217 | 1.94E-216 |
| Limd1   | -2.08139 | 7.94E-219 | 6.43E-218 |
| Ddah1   | -2.62966 | 1.52E-218 | 1.23E-217 |
| Des     | -4.92971 | 3.14E-217 | 2.53E-216 |
| Stard13 | -5.2697  | 5.32E-218 | 4.30E-217 |
| Dnajc3  | -1.48354 | 8.71E-222 | 7.10E-221 |
| Rps11   | -0.7215  | 3.67E-225 | 3.04E-224 |
| Nfkb1   | -2.87653 | 1.20E-221 | 9.78E-221 |
| Btg3    | -2.47663 | 2.76E-222 | 2.26E-221 |
| Crym    | -2.27575 | 4.26E-222 | 3.48E-221 |
| A4galt  | -5.46931 | 3.41E-220 | 2.77E-219 |
| Grap    | -4.94886 | 6.28E-221 | 5.11E-220 |
| Nfe2l1  | -1.32142 | 4.79E-225 | 3.96E-224 |
| Myo1e   | -4.21068 | 3.76E-222 | 3.07E-221 |
| Timp2   | -3.37161 | 6.85E-223 | 5.61E-222 |
| Wtip    | -2.81304 | 1.33E-223 | 1.09E-222 |
| Rock2   | -1.07235 | 3.96E-227 | 3.30E-226 |
| Lars2   | -1.10095 | 1.46E-227 | 1.22E-226 |
| Trim35  | -2.71487 | 3.39E-224 | 2.79E-223 |
| Sh3bp5  | -4.05417 | 5.99E-224 | 4.92E-223 |
| Fcho2   | -1.26243 | 2.09E-228 | 1.75E-227 |
| Nhs1l   | -5.03968 | 5.83E-224 | 4.80E-223 |
| Blvrb   | -2.7398  | 6.89E-226 | 5.72E-225 |
| Hbegf   | -4.469   | 2.16E-224 | 1.78E-223 |
| Macf1   | -0.87163 | 2.22E-229 | 1.87E-228 |

|           |          |           |           |
|-----------|----------|-----------|-----------|
| Card10    | -4.19915 | 9.21E-225 | 7.61E-224 |
| Pcdh17    | -4.2518  | 2.96E-225 | 2.45E-224 |
| Parva     | -3.03054 | 4.71E-226 | 3.91E-225 |
| Arhgap42  | -4.22388 | 1.15E-224 | 9.51E-224 |
| Efna1     | -5.08854 | 1.33E-224 | 1.10E-223 |
| Serpinb9  | -4.65195 | 3.78E-225 | 3.13E-224 |
| Nucb1     | -2.04346 | 7.95E-228 | 6.64E-227 |
| Tgfb1     | -5.31311 | 1.49E-225 | 1.24E-224 |
| Lhfp12    | -4.25779 | 1.42E-226 | 1.18E-225 |
| Atp1a1    | -1.30892 | 4.25E-230 | 3.60E-229 |
| Cmtm6     | -2.43837 | 8.55E-229 | 7.18E-228 |
| Hspa8     | -0.83497 | 5.42E-232 | 4.63E-231 |
| Olf1372-p | -3.58776 | 7.24E-227 | 6.03E-226 |
| Ier5l     | -5.5912  | 8.83E-227 | 7.34E-226 |
| Setd7     | -3.49638 | 1.85E-228 | 1.55E-227 |
| Ywhab     | -1.04684 | 3.32E-234 | 2.87E-233 |
| Irf1      | -4.77021 | 4.57E-229 | 3.85E-228 |
| Emp1      | -4.49636 | 5.09E-230 | 4.30E-229 |
| Flna      | -2.26171 | 1.96E-232 | 1.68E-231 |
| Esyt1     | -2.73917 | 2.62E-232 | 2.25E-231 |
| Nr2f1     | -3.79586 | 4.46E-231 | 3.79E-230 |
| Piezo1    | -5.06331 | 1.68E-230 | 1.42E-229 |
| Sigirr    | -5.04549 | 4.75E-231 | 4.03E-230 |
| Ctdsp2    | -1.68816 | 5.39E-235 | 4.66E-234 |
| Psme2     | -2.13194 | 1.56E-234 | 1.35E-233 |
| Gja4      | -5.13692 | 3.96E-231 | 3.37E-230 |
| Lhfp      | -4.90982 | 1.29E-231 | 1.10E-230 |
| Dipk1a    | -3.89941 | 1.10E-232 | 9.41E-232 |
| Rtp4      | -5.31834 | 4.21E-232 | 3.60E-231 |
| Zfp704    | -3.22837 | 3.70E-234 | 3.19E-233 |
| Sox4      | -3.61407 | 2.12E-233 | 1.82E-232 |
| Sema6d    | -5.47308 | 2.21E-232 | 1.90E-231 |
| Dazap2    | -1.37663 | 3.10E-237 | 2.71E-236 |
| Septin9   | -4.13258 | 2.25E-233 | 1.93E-232 |
| Parp14    | -4.65727 | 1.98E-233 | 1.70E-232 |
| Slc19a3   | -5.69831 | 2.47E-233 | 2.12E-232 |
| Clu       | -1.83709 | 5.15E-236 | 4.47E-235 |
| Tmem140   | -4.96981 | 9.26E-235 | 8.00E-234 |
| Gpr4      | -5.68563 | 2.47E-234 | 2.13E-233 |
| Rps26     | -0.83754 | 6.29E-241 | 5.55E-240 |
| Pnpla2    | -2.67855 | 2.04E-237 | 1.79E-236 |
| Dll4      | -5.41343 | 5.92E-235 | 5.12E-234 |
| Creb3l2   | -2.58659 | 7.84E-238 | 6.87E-237 |
| Ephb4     | -5.28316 | 6.29E-236 | 5.45E-235 |
| Shroom4   | -5.22642 | 1.59E-236 | 1.38E-235 |
| Kif1c     | -2.33347 | 4.61E-239 | 4.05E-238 |
| Chmp3     | -1.5396  | 2.64E-241 | 2.34E-240 |

|         |          |           |           |
|---------|----------|-----------|-----------|
| Ppic    | -5.62785 | 4.80E-237 | 4.19E-236 |
| Mxra7   | -1.47293 | 9.69E-242 | 8.60E-241 |
| Nbdy    | -2.69073 | 5.20E-240 | 4.59E-239 |
| Gm37474 | -7.7151  | 2.65E-237 | 2.31E-236 |
| Myo6    | -1.42637 | 8.72E-243 | 7.78E-242 |
| Plekhg1 | -4.22198 | 9.41E-239 | 8.27E-238 |
| Tsc22d4 | -2.20424 | 2.44E-241 | 2.16E-240 |
| Ifit1   | -5.31247 | 1.01E-238 | 8.86E-238 |
| Bmx     | -5.6596  | 3.57E-239 | 3.14E-238 |
| Tm6sf1  | -3.44466 | 2.15E-241 | 1.91E-240 |
| Mir6236 | -1.1813  | 1.01E-245 | 9.15E-245 |
| Pdia3   | -1.2077  | 1.85E-245 | 1.67E-244 |
| Dkk3    | -2.30906 | 4.42E-242 | 3.93E-241 |
| Sik1    | -3.49084 | 6.56E-242 | 5.83E-241 |
| Dag1    | -1.69605 | 4.72E-245 | 4.24E-244 |
| Pmp22   | -4.03831 | 2.62E-242 | 2.33E-241 |
| Lpar6   | -4.5277  | 2.21E-242 | 1.97E-241 |
| Afdn    | -1.26621 | 1.34E-247 | 1.21E-246 |
| Copz2   | -3.72571 | 3.91E-243 | 3.49E-242 |
| Gclm    | -1.85177 | 4.70E-247 | 4.27E-246 |
| Pik3ip1 | -3.70662 | 1.30E-244 | 1.17E-243 |
| Gstm5   | -1.97855 | 1.47E-246 | 1.33E-245 |
| Fyn     | -3.02633 | 4.16E-246 | 3.76E-245 |
| Msrb3   | -4.51454 | 1.35E-244 | 1.21E-243 |
| Tcf7    | -5.78756 | 4.42E-244 | 3.95E-243 |
| Anxa11  | -5.06642 | 1.78E-244 | 1.60E-243 |
| Vasp    | -2.63674 | 2.28E-247 | 2.07E-246 |
| Plxnd1  | -4.52279 | 9.14E-245 | 8.21E-244 |
| Clec14a | -6.08915 | 2.33E-244 | 2.09E-243 |
| Arhgef3 | -5.22508 | 5.04E-245 | 4.53E-244 |
| Pear1   | -5.30742 | 4.09E-245 | 3.68E-244 |
| Smox    | -3.9598  | 5.58E-246 | 5.04E-245 |
| Nedd9   | -3.39092 | 5.18E-247 | 4.69E-246 |
| Plce1   | -3.45053 | 1.00E-246 | 9.08E-246 |
| Nr2f2   | -2.25226 | 1.17E-248 | 1.07E-247 |
| Midn    | -2.3429  | 6.27E-249 | 5.73E-248 |
| Picalm  | -1.31081 | 1.42E-251 | 1.30E-250 |
| S1pr3   | -4.1643  | 3.72E-247 | 3.37E-246 |
| Id2     | -3.30929 | 1.74E-248 | 1.59E-247 |
| Lrrfip1 | -4.8554  | 1.80E-247 | 1.63E-246 |
| Zic2    | -5.73235 | 6.60E-247 | 5.98E-246 |
| Txndc17 | -1.76182 | 9.35E-252 | 8.62E-251 |
| Cpne8   | -5.56547 | 9.80E-248 | 8.92E-247 |
| Leprot  | -2.1373  | 1.22E-251 | 1.12E-250 |
| Ifnar1  | -1.78964 | 1.87E-252 | 1.72E-251 |
| Grn     | -2.59733 | 1.47E-252 | 1.36E-251 |
| Ddah2   | -2.48907 | 4.14E-254 | 3.86E-253 |

|           |          |           |           |
|-----------|----------|-----------|-----------|
| Sat1      | -1.6581  | 8.87E-256 | 8.31E-255 |
| Oasl2     | -4.66775 | 9.61E-252 | 8.85E-251 |
| Irf2bp2   | -1.46736 | 4.44E-257 | 4.17E-256 |
| Sh3bp4    | -4.33525 | 1.63E-252 | 1.50E-251 |
| Fkbp9     | -4.44933 | 2.12E-252 | 1.96E-251 |
| Tmco1     | -1.59366 | 9.14E-258 | 8.64E-257 |
| Efnb2     | -4.89643 | 1.27E-252 | 1.18E-251 |
| Ttc28     | -1.71943 | 3.13E-257 | 2.95E-256 |
| Tmeff1    | -4.73951 | 7.48E-253 | 6.93E-252 |
| Gch1      | -5.82134 | 8.80E-253 | 8.15E-252 |
| Pcdh19    | -5.03124 | 1.11E-253 | 1.04E-252 |
| Rin2      | -3.79443 | 1.30E-254 | 1.22E-253 |
| Unc5b     | -4.43957 | 1.12E-253 | 1.04E-252 |
| 9930111J2 | -5.87839 | 2.39E-253 | 2.22E-252 |
| Bgn       | -4.69818 | 5.49E-254 | 5.11E-253 |
| Ccn2      | -4.37538 | 3.68E-254 | 3.43E-253 |
| Rpl11     | -0.7707  | 2.89E-262 | 2.78E-261 |
| Kctd10    | -2.0509  | 1.56E-258 | 1.48E-257 |
| Notch4    | -3.98962 | 7.89E-256 | 7.40E-255 |
| Tmem184l  | -2.7915  | 1.13E-257 | 1.07E-256 |
| Tnfsf10   | -5.4046  | 3.80E-255 | 3.55E-254 |
| Cryab     | -1.70514 | 2.40E-259 | 2.29E-258 |
| Rps10     | -1.09172 | 1.06E-262 | 1.02E-261 |
| Luzp1     | -1.25003 | 3.10E-262 | 2.98E-261 |
| Rnf125    | -6.86751 | 8.47E-256 | 7.94E-255 |
| Socs3     | -3.95562 | 4.05E-257 | 3.80E-256 |
| Rcn3      | -4.84529 | 1.18E-257 | 1.12E-256 |
| Ppp1r16b  | -4.58713 | 8.39E-258 | 7.94E-257 |
| Tgfbr3    | -5.41539 | 7.30E-258 | 6.92E-257 |
| Smagp     | -5.61805 | 1.17E-257 | 1.10E-256 |
| Cyb5a     | -1.70124 | 2.97E-263 | 2.86E-262 |
| Ackr3     | -5.22309 | 7.66E-259 | 7.28E-258 |
| Rps28     | -0.8406  | 8.35E-267 | 8.17E-266 |
| Gm37033   | -6.3688  | 1.51E-258 | 1.43E-257 |
| Tcaf1     | -2.6578  | 3.64E-262 | 3.49E-261 |
| Gna11     | -1.54669 | 8.70E-265 | 8.45E-264 |
| Sypl      | -1.40516 | 9.84E-266 | 9.59E-265 |
| Sh2b3     | -4.16189 | 1.34E-260 | 1.28E-259 |
| Myo1c     | -3.56128 | 5.71E-262 | 5.48E-261 |
| Ctsz      | -2.46787 | 1.57E-263 | 1.52E-262 |
| Cdc42ep4  | -3.66665 | 1.89E-262 | 1.82E-261 |
| Alas1     | -1.93265 | 8.12E-266 | 7.93E-265 |
| Rps27a    | -0.73818 | 5.29E-270 | 5.23E-269 |
| Capg      | -5.02687 | 7.59E-262 | 7.28E-261 |
| Vgll4     | -2.5327  | 1.16E-264 | 1.13E-263 |
| Slc1a1    | -3.96238 | 2.78E-263 | 2.68E-262 |
| Map1lc3a  | -1.34037 | 6.02E-269 | 5.94E-268 |

|          |          |           |           |
|----------|----------|-----------|-----------|
| Ptprr    | -5.16872 | 2.75E-263 | 2.65E-262 |
| Sox13    | -4.84183 | 1.48E-263 | 1.43E-262 |
| Cspg4    | -4.80171 | 1.04E-263 | 1.01E-262 |
| Ctsl     | -1.37578 | 2.04E-269 | 2.01E-268 |
| Mcam     | -5.05226 | 2.69E-265 | 2.62E-264 |
| Synm     | -1.5418  | 1.34E-270 | 1.33E-269 |
| Slc39a8  | -5.08814 | 6.04E-267 | 5.92E-266 |
| P2ry14   | -5.39338 | 3.75E-267 | 3.68E-266 |
| Crybg3   | -2.28625 | 7.02E-272 | 7.01E-271 |
| Slc16a9  | -6.26054 | 6.28E-268 | 6.16E-267 |
| Ptpn14   | -4.92025 | 6.57E-269 | 6.47E-268 |
| Tcf15    | -5.69761 | 3.29E-268 | 3.24E-267 |
| Cdk17    | -2.8353  | 2.28E-271 | 2.27E-270 |
| Nova2    | -4.91542 | 1.51E-269 | 1.49E-268 |
| Egr1     | -2.52415 | 1.80E-271 | 1.79E-270 |
| Rarres2  | -4.08158 | 6.06E-270 | 5.99E-269 |
| Cyfp1    | -1.8794  | 2.08E-274 | 2.10E-273 |
| Wls      | -5.36722 | 1.38E-269 | 1.36E-268 |
| Csrp1    | -3.30998 | 4.08E-272 | 4.08E-271 |
| Gm28438  | -1.04708 | 1.71E-278 | 1.75E-277 |
| Kank2    | -5.18059 | 1.20E-270 | 1.19E-269 |
| Arhgef17 | -4.01976 | 3.98E-272 | 3.98E-271 |
| Pde5a    | -5.22263 | 1.16E-271 | 1.16E-270 |
| Igfbp3   | -4.78999 | 1.26E-272 | 1.26E-271 |
| Plxdc2   | -5.26303 | 1.69E-272 | 1.69E-271 |
| Pmaip1   | -5.21181 | 8.44E-273 | 8.47E-272 |
| Lmo7     | -5.77061 | 9.90E-273 | 9.93E-272 |
| Nbl1     | -3.86047 | 5.90E-274 | 5.95E-273 |
| Flt4     | -4.17037 | 2.10E-273 | 2.11E-272 |
| Ptprk    | -5.64026 | 3.94E-273 | 3.96E-272 |
| Efh2     | -3.45364 | 2.77E-275 | 2.81E-274 |
| Plcg1    | -3.2557  | 1.02E-275 | 1.04E-274 |
| Tln1     | -1.51179 | 5.36E-281 | 5.53E-280 |
| Rgs12    | -4.76847 | 2.59E-275 | 2.62E-274 |
| Cd63     | -1.77603 | 1.07E-279 | 1.10E-278 |
| Ralb     | -3.39539 | 3.79E-277 | 3.86E-276 |
| Ephx1    | -4.46644 | 2.50E-276 | 2.54E-275 |
| Kcnj8    | -4.84204 | 5.74E-277 | 5.84E-276 |
| Srgap2   | -2.04441 | 4.93E-282 | 5.10E-281 |
| Bcl2l1   | -1.87922 | 3.54E-283 | 3.69E-282 |
| Arhgef15 | -4.89844 | 7.76E-279 | 7.95E-278 |
| Lrp1     | -2.92725 | 9.04E-281 | 9.33E-280 |
| Arhgdib  | -4.42814 | 2.06E-279 | 2.11E-278 |
| Rplp2    | -0.82317 | 4.15E-289 | 4.39E-288 |
| Tns3     | -3.13077 | 8.95E-282 | 9.26E-281 |
| AW112010 | -5.37986 | 9.75E-280 | 1.00E-278 |
| Gm26532  | -5.15399 | 6.88E-280 | 7.08E-279 |



|           |          |           |           |
|-----------|----------|-----------|-----------|
| Tbc1d1    | -5.21039 | 1.77E-280 | 1.83E-279 |
| Dstn      | -1.15122 | 4.58E-288 | 4.83E-287 |
| Camk1     | -3.87831 | 4.42E-282 | 4.59E-281 |
| Abr       | -3.91711 | 1.44E-282 | 1.50E-281 |
| Atp10d    | -4.50285 | 3.88E-282 | 4.02E-281 |
| Lama5     | -4.30694 | 4.88E-282 | 5.06E-281 |
| Tnfrsf1a  | -4.83626 | 5.87E-282 | 6.08E-281 |
| Eef1d     | -1.46972 | 5.01E-290 | 5.32E-289 |
| Rcn2      | -1.99133 | 1.48E-288 | 1.56E-287 |
| Inf2      | -3.93067 | 2.12E-284 | 2.21E-283 |
| Pros1     | -3.6006  | 1.13E-285 | 1.19E-284 |
| Samd9l    | -5.65203 | 2.41E-284 | 2.51E-283 |
| Pcp4l1    | -1.2651  | 1.05E-291 | 1.12E-290 |
| Inpp4b    | -4.0633  | 1.89E-285 | 1.97E-284 |
| Itpr1     | -2.8195  | 1.10E-287 | 1.16E-286 |
| Plscr4    | -4.17139 | 1.06E-285 | 1.11E-284 |
| Extl3     | -2.37604 | 3.77E-289 | 4.00E-288 |
| Rnase4    | -5.22332 | 1.37E-286 | 1.44E-285 |
| Peak1     | -3.11038 | 9.15E-290 | 9.70E-289 |
| Pomp      | -1.09325 | 1.68E-296 | 1.83E-295 |
| Rgs4      | -4.99309 | 1.71E-288 | 1.81E-287 |
| Kctd12b   | -5.5077  | 1.68E-288 | 1.77E-287 |
| Cttnbp2nl | -2.74976 | 1.00E-291 | 1.07E-290 |
| Aspn      | -5.55468 | 1.02E-288 | 1.08E-287 |
| Pcmt1d1   | -1.27735 | 2.40E-297 | 2.62E-296 |
| Enc1      | -3.84049 | 1.47E-291 | 1.57E-290 |
| Spaar     | -5.45227 | 2.61E-290 | 2.77E-289 |
| Dst       | -1.60287 | 1.74E-297 | 1.90E-296 |
| Psmb9     | -4.71173 | 4.70E-291 | 5.01E-290 |
| Irak1     | -3.62096 | 8.46E-293 | 9.10E-292 |
| H2-Q4     | -4.42658 | 6.14E-292 | 6.58E-291 |
| Septin11  | -1.9468  | 5.30E-297 | 5.78E-296 |
| Fkbp1a    | -1.40939 | 4.31E-299 | 4.74E-298 |
| mt-Cytb   | -0.7587  | 1.73E-303 | 1.94E-302 |
| Nhsl2     | -4.90314 | 1.62E-292 | 1.74E-291 |
| Mtarc2    | -1.93186 | 1.52E-298 | 1.67E-297 |
| Tmcc3     | -4.27008 | 3.94E-293 | 4.25E-292 |
| Ywhah     | -1.67112 | 1.75E-299 | 1.93E-298 |
| Slc40a1   | -3.5314  | 2.05E-294 | 2.22E-293 |
| Ceacam1   | -4.56569 | 3.53E-294 | 3.82E-293 |
| Sqstm1    | -2.21991 | 4.85E-299 | 5.32E-298 |
| Lrrc58    | -1.62344 | 2.81E-301 | 3.11E-300 |
| Zic3      | -4.84378 | 1.31E-294 | 1.42E-293 |
| Gabarap   | -1.18166 | 5.31E-303 | 5.92E-302 |
| Tspan12   | -5.11339 | 2.35E-294 | 2.55E-293 |
| Plpp3     | -3.31383 | 1.09E-296 | 1.18E-295 |
| Tubb2a    | -3.65639 | 3.59E-298 | 3.93E-297 |

|          |          |           |           |
|----------|----------|-----------|-----------|
| Hint1    | -0.99011 | 6.81E-306 | 7.68E-305 |
| Ripor1   | -2.89065 | 2.83E-299 | 3.11E-298 |
| Zeb2     | -3.26155 | 1.31E-299 | 1.45E-298 |
| Ctnna1   | -1.34422 | 1.55E-305 | 1.75E-304 |
| Calcr1   | -5.21316 | 5.51E-298 | 6.03E-297 |
| Rpl6     | -0.90335 | 0.00E+00  | 7.71E-308 |
| Anxa6    | -4.37448 | 2.65E-299 | 2.92E-298 |
| Gucy1a1  | -3.31995 | 6.65E-301 | 7.36E-300 |
| Thsd1    | -4.00736 | 8.01E-301 | 8.85E-300 |
| Hebp1    | -4.50604 | 8.74E-301 | 9.66E-300 |
| Fam107a  | -3.81176 | 1.07E-301 | 1.19E-300 |
| Mapk3    | -1.79518 | 2.53E-307 | 2.87E-306 |
| Ccm2l    | -4.87337 | 1.78E-301 | 1.97E-300 |
| Fxyd1    | -2.29999 | 2.26E-305 | 2.54E-304 |
| Jup      | -3.5381  | 1.90E-303 | 2.13E-302 |
| Ano6     | -4.67588 | 1.70E-302 | 1.89E-301 |
| Grb14    | -5.56055 | 3.76E-302 | 4.18E-301 |
| Mgll     | -2.87552 | 6.49E-306 | 7.32E-305 |
| Hsd17b11 | -5.10817 | 2.26E-303 | 2.52E-302 |
| Akr1a1   | -1.22072 | 0         | 0         |
| S100a10  | -2.69693 | 0.00E+00  | 1.22E-307 |
| Rpl26    | -0.80584 | 0         | 0         |
| Hmgb1    | -1.0752  | 0         | 0         |
| Tril     | -4.11542 | 2.87E-308 | 3.26E-307 |
| Mapre1   | -1.56106 | 0         | 0         |
| Ifi35    | -4.16349 | 0.00E+00  | 1.58E-307 |
| Cthrc1   | -4.89287 | 0.00E+00  | 2.44E-308 |
| Ppp1r2   | -1.52051 | 0         | 0         |
| Niban2   | -4.25536 | 5.3656661 | 0.00E+00  |
| Gbp3     | -5.72134 | 0.00E+00  | 4.04E-308 |
| Stmn1    | -2.17909 | 0         | 0         |
| Zfhx3    | -3.8709  | 0         | 0         |
| Golim4   | -1.51069 | 0         | 0         |
| Itpr12   | -5.23622 | 0         | 0         |
| Dab2     | -5.64311 | 0         | 0         |
| Rpl18a   | -0.87224 | 0         | 0         |
| Rasgrp2  | -2.64155 | 0         | 0         |
| Dgkh     | -3.90519 | 0         | 0         |
| Dock6    | -4.43862 | 0         | 0         |
| Osmr     | -4.74724 | 0         | 0         |
| Rplp0    | -1.2369  | 0         | 0         |
| Psmb10   | -3.12107 | 0         | 0         |
| Spry1    | -4.98385 | 0         | 0         |
| Plaat3   | -2.45245 | 0         | 0         |
| Nrp2     | -5.272   | 0         | 0         |
| Limch1   | -1.69505 | 0         | 0         |
| Plin2    | -4.41473 | 0         | 0         |

|          |          |   |   |
|----------|----------|---|---|
| B4galt4  | -4.70718 | 0 | 0 |
| Slc50a1  | -2.24597 | 0 | 0 |
| Hspa12b  | -5.16525 | 0 | 0 |
| Afap1l2  | -5.42189 | 0 | 0 |
| Casq2    | -5.37723 | 0 | 0 |
| Gng12    | -3.94043 | 0 | 0 |
| Gm10076  | -1.35846 | 0 | 0 |
| mt-Nd4   | -0.86933 | 0 | 0 |
| Dock1    | -3.84403 | 0 | 0 |
| Gja1     | -5.68169 | 0 | 0 |
| Dpysl2   | -1.93173 | 0 | 0 |
| Rps20    | -0.90352 | 0 | 0 |
| Lysmd2   | -3.51965 | 0 | 0 |
| Acaa2    | -2.92308 | 0 | 0 |
| Slc16a2  | -3.63667 | 0 | 0 |
| Fmnl3    | -4.27187 | 0 | 0 |
| Morf4l1  | -1.09319 | 0 | 0 |
| Actn4    | -1.32942 | 0 | 0 |
| Ecm1     | -3.64781 | 0 | 0 |
| Mxd4     | -1.72745 | 0 | 0 |
| S100a1   | -2.04325 | 0 | 0 |
| Pim3     | -2.54693 | 0 | 0 |
| Akap13   | -1.83252 | 0 | 0 |
| Tmem176l | -3.69048 | 0 | 0 |
| Pfn1     | -1.23039 | 0 | 0 |
| Ppib     | -1.31732 | 0 | 0 |
| Lasp1    | -2.85436 | 0 | 0 |
| Tpm3-rs7 | -3.07243 | 0 | 0 |
| Ldlrad3  | -4.77684 | 0 | 0 |
| Atp6v0e  | -1.94792 | 0 | 0 |
| Rps16    | -0.89972 | 0 | 0 |
| Tnrc18   | -3.31561 | 0 | 0 |
| Tmtc2    | -3.84918 | 0 | 0 |
| Tacc1    | -1.66008 | 0 | 0 |
| Ndrp2    | -2.45281 | 0 | 0 |
| Adam10   | -1.93629 | 0 | 0 |
| Prdx6    | -1.82614 | 0 | 0 |
| Rapgef4  | -5.29477 | 0 | 0 |
| Rpl31    | -1.11941 | 0 | 0 |
| Rai14    | -4.92854 | 0 | 0 |
| Tamalin  | -4.81779 | 0 | 0 |
| Rlbp1    | -1.83023 | 0 | 0 |
| Ccdc85b  | -1.43264 | 0 | 0 |
| Lgals9   | -5.21653 | 0 | 0 |
| Rgs3     | -3.89147 | 0 | 0 |
| Gbp7     | -5.62085 | 0 | 0 |
| Elovl7   | -3.98777 | 0 | 0 |

|          |          |   |   |
|----------|----------|---|---|
| St8sia4  | -5.28022 | 0 | 0 |
| Rbfox2   | -4.26789 | 0 | 0 |
| Adgra2   | -4.25123 | 0 | 0 |
| Isg15    | -5.5881  | 0 | 0 |
| Fzd4     | -2.17223 | 0 | 0 |
| Igf1r    | -1.20289 | 0 | 0 |
| Mprrip   | -1.41835 | 0 | 0 |
| Xdh      | -5.0694  | 0 | 0 |
| Sipa1    | -4.24978 | 0 | 0 |
| Cracr2b  | -4.31135 | 0 | 0 |
| Dock9    | -1.78222 | 0 | 0 |
| Prkch    | -4.60559 | 0 | 0 |
| Gucy1b1  | -3.971   | 0 | 0 |
| Nav1     | -2.21622 | 0 | 0 |
| Ski      | -2.39594 | 0 | 0 |
| Gatm     | -6.03921 | 0 | 0 |
| Prkar1a  | -1.36872 | 0 | 0 |
| Stard8   | -5.28747 | 0 | 0 |
| Trim56   | -5.17758 | 0 | 0 |
| Gvin-ps7 | -5.98889 | 0 | 0 |
| Lama4    | -5.62673 | 0 | 0 |
| Cpd      | -1.98826 | 0 | 0 |
| Jag2     | -3.2922  | 0 | 0 |
| Gstm1    | -3.08624 | 0 | 0 |
| Rab11a   | -1.72674 | 0 | 0 |
| Rpl28    | -0.90558 | 0 | 0 |
| Slco2b1  | -5.57243 | 0 | 0 |
| Tbx1     | -5.07245 | 0 | 0 |
| Car5a    | -6.38563 | 0 | 0 |
| Tmem123  | -2.90822 | 0 | 0 |
| Pir      | -5.44635 | 0 | 0 |
| Dusp6    | -4.73639 | 0 | 0 |
| Pkp4     | -2.23316 | 0 | 0 |
| Degs2    | -4.84686 | 0 | 0 |
| Pam      | -4.14778 | 0 | 0 |
| Tdrp     | -5.34093 | 0 | 0 |
| Slc22a8  | -5.58255 | 0 | 0 |
| Vwf      | -4.60253 | 0 | 0 |
| Notch3   | -5.02266 | 0 | 0 |
| Nid1     | -5.71846 | 0 | 0 |
| Nudt4    | -1.88164 | 0 | 0 |
| Phldb2   | -5.43479 | 0 | 0 |
| Tmod3    | -2.05026 | 0 | 0 |
| Rpl12    | -1.07928 | 0 | 0 |
| Plec     | -2.52334 | 0 | 0 |
| Rpl39    | -0.96166 | 0 | 0 |
| Lrp8     | -2.14185 | 0 | 0 |

|            |          |   |   |
|------------|----------|---|---|
| Hrct1      | -5.12229 | 0 | 0 |
| Entpd1     | -5.63292 | 0 | 0 |
| Mcc        | -3.33275 | 0 | 0 |
| Fosb       | -3.42959 | 0 | 0 |
| Neat1      | -3.01518 | 0 | 0 |
| Tbc1d4     | -5.43436 | 0 | 0 |
| Filip1     | -4.87649 | 0 | 0 |
| Mndal      | -5.95836 | 0 | 0 |
| Rpl17      | -0.98257 | 0 | 0 |
| Acer2      | -2.72595 | 0 | 0 |
| Pcdh1      | -4.94382 | 0 | 0 |
| Tpm3       | -2.72669 | 0 | 0 |
| Ccn1       | -4.91914 | 0 | 0 |
| Filip1l    | -4.63132 | 0 | 0 |
| Spc25      | -2.06053 | 0 | 0 |
| mt-Co1     | -1.02979 | 0 | 0 |
| Rps24      | -0.86237 | 0 | 0 |
| Rpl19      | -0.94572 | 0 | 0 |
| Palm       | -3.21187 | 0 | 0 |
| Swap70     | -3.88719 | 0 | 0 |
| Dlc1       | -1.77554 | 0 | 0 |
| Sp100      | -5.72588 | 0 | 0 |
| Gpr146     | -3.12839 | 0 | 0 |
| Epha4      | -3.81952 | 0 | 0 |
| Ets2       | -4.60555 | 0 | 0 |
| Nfix       | -2.4299  | 0 | 0 |
| Shisa5     | -4.70943 | 0 | 0 |
| Cav1       | -3.22764 | 0 | 0 |
| Cox4i2     | -2.39122 | 0 | 0 |
| Hmgcs2     | -5.50695 | 0 | 0 |
| Acadl      | -3.59235 | 0 | 0 |
| Zfp366     | -5.54678 | 0 | 0 |
| Pdlim5     | -2.18781 | 0 | 0 |
| Ttll7      | -4.30318 | 0 | 0 |
| Cr1l       | -3.51941 | 0 | 0 |
| St6galnac3 | -5.79642 | 0 | 0 |
| Rpl23      | -0.92552 | 0 | 0 |
| Klhl5      | -3.81152 | 0 | 0 |
| Crtap      | -5.61659 | 0 | 0 |
| Arap3      | -5.40764 | 0 | 0 |
| Higd1b     | -5.16815 | 0 | 0 |
| Cfl1       | -1.25272 | 0 | 0 |
| Lims2      | -5.35066 | 0 | 0 |
| Tiam1      | -4.39949 | 0 | 0 |
| Kctd12     | -4.63817 | 0 | 0 |
| Agrn       | -3.76713 | 0 | 0 |
| Ptprm      | -4.78948 | 0 | 0 |

|          |          |   |   |
|----------|----------|---|---|
| Ctnnbip1 | -2.42372 | 0 | 0 |
| Mcl1     | -1.75314 | 0 | 0 |
| Ptbp3    | -2.11633 | 0 | 0 |
| Hspg2    | -5.04711 | 0 | 0 |
| Eva1b    | -4.94373 | 0 | 0 |
| Aqp11    | -5.05443 | 0 | 0 |
| 4930523C | -5.94061 | 0 | 0 |
| Edn1     | -5.44718 | 0 | 0 |
| Kif26a   | -5.46854 | 0 | 0 |
| Cnn2     | -4.62035 | 0 | 0 |
| Lamc1    | -3.12467 | 0 | 0 |
| Tbx3     | -5.64494 | 0 | 0 |
| Erg      | -5.2625  | 0 | 0 |
| Vamp5    | -3.68347 | 0 | 0 |
| Tnfrsf19 | -5.90181 | 0 | 0 |
| Rpl34    | -1.06143 | 0 | 0 |
| Sema6a   | -4.72433 | 0 | 0 |
| Tmem252  | -5.16991 | 0 | 0 |
| Arpc2    | -1.42617 | 0 | 0 |
| Gnb4     | -5.67936 | 0 | 0 |
| Ifi203   | -5.91209 | 0 | 0 |
| Psap     | -1.4839  | 0 | 0 |
| Apbb2    | -2.02873 | 0 | 0 |
| Abcc9    | -4.83319 | 0 | 0 |
| Hmcn1    | -6.43459 | 0 | 0 |
| Ndufa4l2 | -4.71445 | 0 | 0 |
| Adgrg1   | -5.52533 | 0 | 0 |
| Parvb    | -3.42539 | 0 | 0 |
| Slc16a1  | -1.52078 | 0 | 0 |
| Fas      | -5.42834 | 0 | 0 |
| Xaf1     | -4.82141 | 0 | 0 |
| Ccnd2    | -5.32293 | 0 | 0 |
| Gimap1   | -5.82702 | 0 | 0 |
| 2900026A | -3.15044 | 0 | 0 |
| Adgrl2   | -4.03076 | 0 | 0 |
| Sema7a   | -2.38104 | 0 | 0 |
| Itm2c    | -2.90701 | 0 | 0 |
| Adgre5   | -5.19619 | 0 | 0 |
| Hdac7    | -4.56503 | 0 | 0 |
| Ech1     | -2.3673  | 0 | 0 |
| Thbd     | -5.51566 | 0 | 0 |
| F11r     | -4.9739  | 0 | 0 |
| Nes      | -5.38744 | 0 | 0 |
| Smco4    | -5.32923 | 0 | 0 |
| Tgm2     | -4.79272 | 0 | 0 |
| Cltb     | -2.43578 | 0 | 0 |
| Islr2    | -5.64854 | 0 | 0 |

|         |          |   |   |
|---------|----------|---|---|
| Rpl32   | -1.04248 | 0 | 0 |
| Nxpe4   | -5.92737 | 0 | 0 |
| Rps14   | -0.96683 | 0 | 0 |
| Auts2   | -4.16263 | 0 | 0 |
| Rpl21   | -1.11996 | 0 | 0 |
| Irx3    | -5.47941 | 0 | 0 |
| Pdgfrb  | -4.96837 | 0 | 0 |
| Rdx     | -1.54832 | 0 | 0 |
| Cebpd   | -4.14786 | 0 | 0 |
| Lipa    | -5.777   | 0 | 0 |
| Rpl36a  | -1.26019 | 0 | 0 |
| Tanc1   | -4.0317  | 0 | 0 |
| Crim1   | -2.72585 | 0 | 0 |
| Abcc4   | -5.5718  | 0 | 0 |
| Adamts1 | -4.6893  | 0 | 0 |
| Cyp2d22 | -4.54486 | 0 | 0 |
| Rps5    | -1.11715 | 0 | 0 |
| Bvht    | -5.16116 | 0 | 0 |
| Capn2   | -5.02378 | 0 | 0 |
| Gata2   | -5.42113 | 0 | 0 |
| Sdcbp   | -2.46781 | 0 | 0 |
| Ushbp1  | -5.96978 | 0 | 0 |
| Tie1    | -5.15633 | 0 | 0 |
| Pmepa1  | -2.46884 | 0 | 0 |
| Rps23   | -1.06101 | 0 | 0 |
| Psmb8   | -4.5165  | 0 | 0 |
| Rps29   | -0.94235 | 0 | 0 |
| Txn1    | -1.77544 | 0 | 0 |
| Tpm1    | -2.26218 | 0 | 0 |
| Depp1   | -4.88054 | 0 | 0 |
| Lpp     | -4.7947  | 0 | 0 |
| Arl4a   | -1.7079  | 0 | 0 |
| Stra6   | -5.15273 | 0 | 0 |
| Robo4   | -5.47379 | 0 | 0 |
| Plip    | -5.38054 | 0 | 0 |
| Tspan13 | -2.26507 | 0 | 0 |
| Smpdl3a | -5.22502 | 0 | 0 |
| H2-T23  | -4.5664  | 0 | 0 |
| Cmtm8   | -6.07062 | 0 | 0 |
| Rpl41   | -0.96814 | 0 | 0 |
| Smad7   | -2.46633 | 0 | 0 |
| Cd2ap   | -1.75909 | 0 | 0 |
| Esyt2   | -2.1442  | 0 | 0 |
| Bst2    | -4.49501 | 0 | 0 |
| Foxn3   | -2.943   | 0 | 0 |
| Cav2    | -3.66159 | 0 | 0 |
| Lmna    | -5.06401 | 0 | 0 |

|           |          |   |   |
|-----------|----------|---|---|
| Tshz2     | -3.36258 | 0 | 0 |
| Rpl36     | -1.09768 | 0 | 0 |
| Srarp     | -5.24646 | 0 | 0 |
| Plac9a    | -3.20808 | 0 | 0 |
| Rassf9    | -6.65986 | 0 | 0 |
| Map3k20   | -5.30572 | 0 | 0 |
| Serpinb6a | -3.59041 | 0 | 0 |
| Trim47    | -5.33041 | 0 | 0 |
| Gpx1      | -2.44713 | 0 | 0 |
| Myl12b    | -2.37454 | 0 | 0 |
| Dock4     | -3.9912  | 0 | 0 |
| Septin4   | -2.26713 | 0 | 0 |
| 1810037I1 | -1.65266 | 0 | 0 |
| C130074G  | -5.25826 | 0 | 0 |
| Ehd2      | -5.3835  | 0 | 0 |
| Slc30a1   | -2.53488 | 0 | 0 |
| Dbi       | -1.60907 | 0 | 0 |
| Fau       | -1.02659 | 0 | 0 |
| Arhgap31  | -2.05164 | 0 | 0 |
| Rps19     | -1.21151 | 0 | 0 |
| Reep5     | -3.00732 | 0 | 0 |
| Ier5      | -3.81589 | 0 | 0 |
| Reck      | -4.40852 | 0 | 0 |
| Fos       | -2.31614 | 0 | 0 |
| Fgd5      | -5.74118 | 0 | 0 |
| Tgfb2     | -3.58611 | 0 | 0 |
| Myl9      | -4.68801 | 0 | 0 |
| Gimap6    | -5.4887  | 0 | 0 |
| Marcks    | -2.26898 | 0 | 0 |
| Apold1    | -4.52198 | 0 | 0 |
| Septin7   | -1.59834 | 0 | 0 |
| Zbtb20    | -1.40913 | 0 | 0 |
| Mmrn2     | -5.15381 | 0 | 0 |
| Cavin3    | -5.10465 | 0 | 0 |
| Eef1b2    | -1.68059 | 0 | 0 |
| Rps27     | -1.04656 | 0 | 0 |
| Prss23    | -5.05319 | 0 | 0 |
| St3gal6   | -4.75784 | 0 | 0 |
| Gpd2      | -4.51357 | 0 | 0 |
| Arap2     | -4.97666 | 0 | 0 |
| Ptms      | -1.3519  | 0 | 0 |
| Fut8      | -5.556   | 0 | 0 |
| Cdc42     | -1.52973 | 0 | 0 |
| She       | -5.53176 | 0 | 0 |
| S100a16   | -2.68281 | 0 | 0 |
| Atp10a    | -5.80352 | 0 | 0 |
| Efr3b     | -4.66028 | 0 | 0 |



|         |          |   |   |
|---------|----------|---|---|
| Rsu1    | -3.56635 | 0 | 0 |
| Flnb    | -4.04264 | 0 | 0 |
| Rps9    | -1.22325 | 0 | 0 |
| Gcnt2   | -5.49161 | 0 | 0 |
| Fzd6    | -5.09012 | 0 | 0 |
| Rpl27a  | -1.30704 | 0 | 0 |
| Rassf3  | -4.39829 | 0 | 0 |
| Podxl   | -1.86107 | 0 | 0 |
| Rasgrp3 | -5.74012 | 0 | 0 |
| Tns2    | -4.49364 | 0 | 0 |
| Ocln    | -4.47139 | 0 | 0 |
| Emp2    | -5.35598 | 0 | 0 |
| Ecscr   | -5.24784 | 0 | 0 |
| Mfsd2a  | -5.30258 | 0 | 0 |
| Afap1l1 | -5.65973 | 0 | 0 |
| Kbtbd11 | -4.12922 | 0 | 0 |
| Cyth3   | -4.36835 | 0 | 0 |
| Fam13c  | -5.42648 | 0 | 0 |
| Cfh     | -5.02767 | 0 | 0 |
| Icam2   | -5.33151 | 0 | 0 |
| Ucp2    | -4.23828 | 0 | 0 |
| mt-Rnr1 | -1.20964 | 0 | 0 |
| Vat1    | -4.62524 | 0 | 0 |
| Itpkb   | -5.2306  | 0 | 0 |
| Arhgdia | -2.45038 | 0 | 0 |
| Ubc     | -1.36409 | 0 | 0 |
| Rpl35   | -1.32954 | 0 | 0 |
| Rpl18   | -1.3557  | 0 | 0 |
| Rps4x   | -1.22873 | 0 | 0 |
| Cast    | -4.28367 | 0 | 0 |
| Myo10   | -2.80117 | 0 | 0 |
| Bmpr2   | -1.74439 | 0 | 0 |
| Eogt    | -4.14487 | 0 | 0 |
| Nenf    | -2.64888 | 0 | 0 |
| Adam15  | -4.02967 | 0 | 0 |
| Elk3    | -4.25941 | 0 | 0 |
| Fam110d | -5.87374 | 0 | 0 |
| Mrtfb   | -3.57743 | 0 | 0 |
| Sash1   | -4.26977 | 0 | 0 |
| Rflnb   | -5.0158  | 0 | 0 |
| Tsc22d3 | -2.8673  | 0 | 0 |
| Atp1a2  | -4.20873 | 0 | 0 |
| Sema3c  | -5.89942 | 0 | 0 |
| Rps3a1  | -1.21322 | 0 | 0 |
| Plcb1   | -5.97473 | 0 | 0 |
| mt-Nd1  | -1.11599 | 0 | 0 |
| Rps12   | -1.2181  | 0 | 0 |

|          |          |   |   |
|----------|----------|---|---|
| Slc3a2   | -1.76369 | 0 | 0 |
| Cobll1   | -5.33357 | 0 | 0 |
| Wwtr1    | -3.26647 | 0 | 0 |
| Ifi27    | -4.71915 | 0 | 0 |
| Cnn3     | -3.07143 | 0 | 0 |
| Apcdd1   | -5.09796 | 0 | 0 |
| Tinagl1  | -5.27161 | 0 | 0 |
| Foxf2    | -5.36828 | 0 | 0 |
| Ifnar2   | -5.33094 | 0 | 0 |
| Il10rb   | -5.42791 | 0 | 0 |
| Clic5    | -6.19092 | 0 | 0 |
| Serpinh1 | -4.80799 | 0 | 0 |
| Prex2    | -3.02195 | 0 | 0 |
| Ier2     | -2.76666 | 0 | 0 |
| Reep3    | -2.26323 | 0 | 0 |
| Gjc1     | -5.77079 | 0 | 0 |
| Myo1b    | -4.46108 | 0 | 0 |
| Cd9      | -3.80462 | 0 | 0 |
| Capns1   | -2.40709 | 0 | 0 |
| Bhlhe40  | -4.96271 | 0 | 0 |
| Uaca     | -4.71361 | 0 | 0 |
| Akap12   | -3.39969 | 0 | 0 |
| Rps21    | -1.1609  | 0 | 0 |
| mt-Nd2   | -1.20508 | 0 | 0 |
| Arpc3    | -2.1365  | 0 | 0 |
| Plk2     | -4.96649 | 0 | 0 |
| Cyba     | -4.69488 | 0 | 0 |
| BC028528 | -5.68442 | 0 | 0 |
| Sox18    | -5.6173  | 0 | 0 |
| Rpl13    | -1.22422 | 0 | 0 |
| Hip1     | -2.77426 | 0 | 0 |
| Arid5b   | -3.49228 | 0 | 0 |
| Rpl37a   | -1.20505 | 0 | 0 |
| Amotl1   | -5.06917 | 0 | 0 |
| Csrp2    | -4.0313  | 0 | 0 |
| Klf3     | -4.44894 | 0 | 0 |
| Rhoj     | -5.12735 | 0 | 0 |
| Mpzl1    | -4.39138 | 0 | 0 |
| Rrbp1    | -2.39823 | 0 | 0 |
| Pls3     | -4.34527 | 0 | 0 |
| Lrrc8c   | -5.61259 | 0 | 0 |
| AU021092 | -5.70688 | 0 | 0 |
| Lamb2    | -4.74189 | 0 | 0 |
| Ostf1    | -3.90502 | 0 | 0 |
| Zmiz1    | -4.00717 | 0 | 0 |
| Cd151    | -5.48557 | 0 | 0 |
| Tjp1     | -2.11567 | 0 | 0 |

|          |          |   |   |
|----------|----------|---|---|
| Lsr      | -4.94459 | 0 | 0 |
| Nostrin  | -6.34576 | 0 | 0 |
| Pon2     | -4.20248 | 0 | 0 |
| Tpt1     | -1.16847 | 0 | 0 |
| Wfdc1    | -5.40837 | 0 | 0 |
| Mecom    | -6.25494 | 0 | 0 |
| Bcam     | -5.13176 | 0 | 0 |
| Mtus1    | -3.2983  | 0 | 0 |
| Lmo2     | -3.81332 | 0 | 0 |
| Zfp36    | -4.28649 | 0 | 0 |
| Tmem204  | -5.36854 | 0 | 0 |
| Cbfa2t3  | -5.65016 | 0 | 0 |
| Iqgap1   | -2.55906 | 0 | 0 |
| Rac1     | -2.21756 | 0 | 0 |
| Junb     | -3.30705 | 0 | 0 |
| Rpl35a   | -1.32827 | 0 | 0 |
| Foxc1    | -5.55906 | 0 | 0 |
| Maoa     | -5.20934 | 0 | 0 |
| Atp1b3   | -3.39126 | 0 | 0 |
| Sri      | -4.01601 | 0 | 0 |
| Klf6     | -3.40404 | 0 | 0 |
| Psme1    | -4.04855 | 0 | 0 |
| Slfn5    | -5.93229 | 0 | 0 |
| S100a11  | -4.17256 | 0 | 0 |
| Cyb5r3   | -3.37385 | 0 | 0 |
| Eef1a1   | -1.22871 | 0 | 0 |
| Kank3    | -3.83153 | 0 | 0 |
| Fnbp1l   | -5.0838  | 0 | 0 |
| Wasf2    | -3.0261  | 0 | 0 |
| Selenom  | -2.40956 | 0 | 0 |
| Nrp1     | -5.94484 | 0 | 0 |
| Arhgap29 | -3.50054 | 0 | 0 |
| Anxa2    | -5.33926 | 0 | 0 |
| Rpl38    | -1.36678 | 0 | 0 |
| Sorbs2   | -2.51182 | 0 | 0 |
| Klf13    | -4.53614 | 0 | 0 |
| Nebl     | -5.51019 | 0 | 0 |
| Paqr5    | -5.94538 | 0 | 0 |
| Ctnnb1   | -1.86144 | 0 | 0 |
| Rpl10    | -1.60406 | 0 | 0 |
| Klf7     | -3.13392 | 0 | 0 |
| Nfia     | -3.49432 | 0 | 0 |
| Prdx1    | -1.85374 | 0 | 0 |
| Qk       | -1.86869 | 0 | 0 |
| Rhoc     | -3.77977 | 0 | 0 |
| Irf2bpl  | -4.50629 | 0 | 0 |
| Foxp1    | -2.66163 | 0 | 0 |

|           |          |   |   |
|-----------|----------|---|---|
| Rasip1    | -5.55577 | 0 | 0 |
| Dusp1     | -3.45987 | 0 | 0 |
| Ctsh      | -4.70231 | 0 | 0 |
| Rgcc      | -4.72402 | 0 | 0 |
| Rhoa      | -1.79251 | 0 | 0 |
| Fcgrt     | -5.22731 | 0 | 0 |
| Rras      | -3.86625 | 0 | 0 |
| Gng11     | -2.26921 | 0 | 0 |
| Ppfibp1   | -5.47126 | 0 | 0 |
| Cdkn1a    | -4.28551 | 0 | 0 |
| Palmd     | -6.30551 | 0 | 0 |
| Cp        | -3.55561 | 0 | 0 |
| Slc7a1    | -4.19311 | 0 | 0 |
| mt-Rnr2   | -1.39707 | 0 | 0 |
| Atox1     | -2.20166 | 0 | 0 |
| Fermt2    | -2.63161 | 0 | 0 |
| Cd81      | -1.9334  | 0 | 0 |
| Gpcpd1    | -2.90279 | 0 | 0 |
| Arpc1b    | -4.80338 | 0 | 0 |
| Rpl37     | -1.39812 | 0 | 0 |
| Ptma      | -1.30791 | 0 | 0 |
| Abhd2     | -5.16698 | 0 | 0 |
| Sh3bgrl   | -3.91428 | 0 | 0 |
| Fli1      | -5.73349 | 0 | 0 |
| Mast4     | -5.07438 | 0 | 0 |
| Cald1     | -3.42205 | 0 | 0 |
| Pdgfb     | -5.63607 | 0 | 0 |
| Tpm4      | -4.52379 | 0 | 0 |
| Dusp3     | -4.47804 | 0 | 0 |
| Ftl1      | -1.73159 | 0 | 0 |
| Rbpms     | -5.53536 | 0 | 0 |
| Ltbp4     | -4.68433 | 0 | 0 |
| Txnip     | -5.14631 | 0 | 0 |
| Cgnl1     | -4.87412 | 0 | 0 |
| Ccdc141   | -4.43111 | 0 | 0 |
| Ablim1    | -2.03642 | 0 | 0 |
| Ctla2a    | -4.82702 | 0 | 0 |
| Sh3bgrl3  | -3.89437 | 0 | 0 |
| Col4a2    | -5.07568 | 0 | 0 |
| Pglyrp1   | -5.2788  | 0 | 0 |
| Jund      | -2.18908 | 0 | 0 |
| Tagln2    | -5.00028 | 0 | 0 |
| Hes1      | -4.61524 | 0 | 0 |
| Plat      | -5.59775 | 0 | 0 |
| Rn18s-rs5 | -1.05866 | 0 | 0 |
| Sox17     | -5.50271 | 0 | 0 |
| Cd93      | -5.91803 | 0 | 0 |

|          |          |   |   |
|----------|----------|---|---|
| Tek      | -5.37978 | 0 | 0 |
| Tgfbr2   | -5.66795 | 0 | 0 |
| Emcn     | -5.5937  | 0 | 0 |
| Rbms1    | -5.88902 | 0 | 0 |
| Acvrl1   | -5.00604 | 0 | 0 |
| Jun      | -3.0039  | 0 | 0 |
| Apoe     | -2.68852 | 0 | 0 |
| Ece1     | -4.47399 | 0 | 0 |
| Mgp      | -4.25539 | 0 | 0 |
| Gnb2     | -3.37702 | 0 | 0 |
| Dab2ip   | -4.33335 | 0 | 0 |
| Cyyr1    | -6.02602 | 0 | 0 |
| Tspo     | -4.4715  | 0 | 0 |
| Clic1    | -4.13129 | 0 | 0 |
| Tmsb10   | -2.5229  | 0 | 0 |
| Mal      | -5.65115 | 0 | 0 |
| Vwa1     | -5.08717 | 0 | 0 |
| Kdr      | -3.3037  | 0 | 0 |
| Anxa3    | -5.64036 | 0 | 0 |
| Gng5     | -2.06573 | 0 | 0 |
| Lef1     | -6.01275 | 0 | 0 |
| Nfkbia   | -2.81356 | 0 | 0 |
| Notch1   | -4.29422 | 0 | 0 |
| Itgb1    | -3.6091  | 0 | 0 |
| S100a13  | -4.20677 | 0 | 0 |
| Myh9     | -3.67105 | 0 | 0 |
| Cavin1   | -4.84593 | 0 | 0 |
| Ifitm2   | -4.20184 | 0 | 0 |
| Aldh2    | -4.3086  | 0 | 0 |
| Myl12a   | -3.50483 | 0 | 0 |
| Itga6    | -5.16037 | 0 | 0 |
| Cd200    | -5.32501 | 0 | 0 |
| Clec2d   | -4.93901 | 0 | 0 |
| Fry      | -5.29768 | 0 | 0 |
| Cdh5     | -5.71274 | 0 | 0 |
| Foxq1    | -6.09674 | 0 | 0 |
| Srgn     | -5.55773 | 0 | 0 |
| Crip1    | -4.22234 | 0 | 0 |
| Cavin2   | -5.99253 | 0 | 0 |
| Ets1     | -5.87464 | 0 | 0 |
| H2-K1    | -3.60505 | 0 | 0 |
| Slc7a5   | -4.37698 | 0 | 0 |
| Anxa5    | -4.01986 | 0 | 0 |
| Myl6     | -2.09971 | 0 | 0 |
| Slc39a10 | -3.91865 | 0 | 0 |
| Cd34     | -5.5528  | 0 | 0 |
| Sgms1    | -3.90928 | 0 | 0 |

|          |          |   |   |
|----------|----------|---|---|
| Col4a1   | -5.45804 | 0 | 0 |
| Msn      | -4.92881 | 0 | 0 |
| Itga1    | -6.04089 | 0 | 0 |
| Tns1     | -5.40296 | 0 | 0 |
| Serinc3  | -2.60805 | 0 | 0 |
| Esam     | -5.44084 | 0 | 0 |
| Rhob     | -4.39764 | 0 | 0 |
| Eng      | -5.46097 | 0 | 0 |
| Laptm4a  | -2.64534 | 0 | 0 |
| Ebf1     | -5.76595 | 0 | 0 |
| Hspb1    | -4.94907 | 0 | 0 |
| Klf4     | -5.62352 | 0 | 0 |
| Glul     | -2.52382 | 0 | 0 |
| Slc9a3r2 | -5.22936 | 0 | 0 |
| Timp3    | -4.76421 | 0 | 0 |
| Fxyd5    | -5.50006 | 0 | 0 |
| Abcg2    | -5.57498 | 0 | 0 |
| Jcad     | -4.24707 | 0 | 0 |
| Ramp2    | -5.09274 | 0 | 0 |
| Calm1    | -1.94471 | 0 | 0 |
| Kitl     | -5.76197 | 0 | 0 |
| Slco1c1  | -5.3939  | 0 | 0 |
| Clic4    | -4.34573 | 0 | 0 |
| Pecam1   | -5.13566 | 0 | 0 |
| Ptn      | -4.5047  | 0 | 0 |
| Tsc22d1  | -2.97981 | 0 | 0 |
| Tm4sf1   | -5.43403 | 0 | 0 |
| Nfib     | -4.42491 | 0 | 0 |
| S1pr1    | -5.36686 | 0 | 0 |
| Rgs5     | -4.64435 | 0 | 0 |
| Adgrl4   | -5.56118 | 0 | 0 |
| H2-D1    | -3.73382 | 0 | 0 |
| Id1      | -4.97784 | 0 | 0 |
| Selenop  | -5.27881 | 0 | 0 |
| Id3      | -4.84879 | 0 | 0 |
| Egfl7    | -5.11729 | 0 | 0 |
| B2m      | -4.81478 | 0 | 0 |
| Fn1      | -5.1348  | 0 | 0 |
| Utrn     | -5.48929 | 0 | 0 |
| Tmsb4x   | -2.35734 | 0 | 0 |
| Itm2a    | -5.12645 | 0 | 0 |
| Adgrf5   | -5.46219 | 0 | 0 |
| Zfp36l1  | -4.90623 | 0 | 0 |
| Hsp90ab1 | -2.14228 | 0 | 0 |
| Epas1    | -3.05778 | 0 | 0 |
| Abcb1a   | -5.88785 | 0 | 0 |
| Slc2a1   | -3.42646 | 0 | 0 |

|         |          |   |   |
|---------|----------|---|---|
| Ifitm3  | -4.94141 | 0 | 0 |
| Klf2    | -4.87209 | 0 | 0 |
| Crip2   | -4.60853 | 0 | 0 |
| Tcf4    | -2.64837 | 0 | 0 |
| Ly6a    | -5.10465 | 0 | 0 |
| Ahnak   | -5.55257 | 0 | 0 |
| Actb    | -2.31572 | 0 | 0 |
| Cxcl12  | -5.7477  | 0 | 0 |
| Slco1a4 | -5.37099 | 0 | 0 |
| Ly6e    | -5.1511  | 0 | 0 |
| Ly6c1   | -4.98618 | 0 | 0 |
| Sptbn1  | -2.75158 | 0 | 0 |
| Vim     | -4.00025 | 0 | 0 |
| Pltp    | -5.10785 | 0 | 0 |
| Ptprb   | -5.77675 | 0 | 0 |
| Spock2  | -5.18921 | 0 | 0 |
| Ppia    | -2.46475 | 0 | 0 |
| Cldn5   | -5.23777 | 0 | 0 |
| Igfbp7  | -5.19409 | 0 | 0 |
| Bsg     | -2.97283 | 0 | 0 |
| Gnas    | -2.81367 | 0 | 0 |
| Sparcl1 | -5.45753 | 0 | 0 |
| Itm2b   | -2.63967 | 0 | 0 |
| App     | -5.10281 | 0 | 0 |
| Gnai2   | -3.77542 | 0 | 0 |
| Flt1    | -5.45243 | 0 | 0 |
| Sparc   | -5.0198  | 0 | 0 |
