# Supplementary material
Source: publisher figshare collection journal article supplement (https://diabetesjournals.figshare.com/articles/dataset/_/24550435)
Supplement: Supplementary file 8 [file 1]

| UID      | Mice_id | Sample type | n_genes | doublet_score | predicted_mt_counts | predicted_cell_type | EC subtype |                         |
|----------|---------|-------------|---------|---------------|---------------------|---------------------|------------|-------------------------|
| AAACCCA  | db/m1   | db/m        | 433     | 0.025868      | FALSE               | 2.982545            | FALSE      | Photoreceptor           |
| AAACCCA  | db/m1   | db/m        | 2305    | 0.028754      | FALSE               | 1.642301            | FALSE      | Neuron                  |
| AAACCCA  | db/m1   | db/m        | 1122    | 0.014151      | FALSE               | 1.57228             | FALSE      | Endothelia Capillary EC |
| AAACCCAC | db/m1   | db/m        | 6585    | 0.075259      | FALSE               | 0.904593            | FALSE      | Neuron                  |
| AAACCCAC | db/m1   | db/m        | 4401    | 0.109375      | TRUE                | 5.423776            | TRUE       |                         |
| AAACCCAC | db/m1   | db/m        | 8878    | 0.007249      | FALSE               | 0.889079            | FALSE      | Photoreceptor           |
| AAACCCAC | db/m1   | db/m        | 7930    | 0.008234      | FALSE               | 0.940683            | FALSE      | Photoreceptor           |
| AAACCCAT | db/m1   | db/m        | 3065    | 0.010157      | FALSE               | 1.583025            | FALSE      | Photoreceptor           |
| AAACGAA  | db/m1   | db/m        | 432     | 0.060641      | FALSE               | 3.351067            | FALSE      | Endothelia Capillary EC |
| AAACGAA  | db/m1   | db/m        | 1592    | 0.115723      | TRUE                | 7.977992            | TRUE       |                         |
| AAACGAA  | db/m1   | db/m        | 1432    | 0.007636      | FALSE               | 2.267093            | FALSE      | Neuron                  |
| AAACGAA  | db/m1   | db/m        | 2749    | 0.061912      | FALSE               | 1.748409            | FALSE      | Endothelia Venous EC    |
| AAACGAA  | db/m1   | db/m        | 1478    | 0.093319      | FALSE               | 2.251535            | FALSE      | Pericyte                |
| AAACGAA  | db/m1   | db/m        | 6972    | 0.007058      | FALSE               | 1.06991             | FALSE      | Photoreceptor           |
| AAACGAA  | db/m1   | db/m        | 2059    | 0.046025      | FALSE               | 0.976255            | FALSE      | Photoreceptor           |
| AAACGAA  | db/m1   | db/m        | 555     | 0.010846      | FALSE               | 1.819253            | FALSE      | Pericyte                |
| AAACGAA  | db/m1   | db/m        | 941     | 0.078788      | FALSE               | 1.978074            | FALSE      | Photoreceptor           |
| AAACGAA  | db/m1   | db/m        | 6489    | 0.051646      | FALSE               | 1.13387             | FALSE      | Photoreceptor           |
| AAACGAA  | db/m1   | db/m        | 460     | 0.045165      | FALSE               | 54.37213            | TRUE       |                         |
| AAACGAA  | db/m1   | db/m        | 370     | 0.047807      | FALSE               | 4.617845            | FALSE      | Muller cell             |
| AAACGAA  | db/m1   | db/m        | 3271    | 0.046025      | FALSE               | 1.267864            | FALSE      | Endothelia Venous EC    |
| AAACGCT  | db/m1   | db/m        | 352     | 0.049679      | FALSE               | 3.965592            | FALSE      | Muller cell             |
| AAACGCT  | db/m1   | db/m        | 3445    | 0.028754      | FALSE               | 0.748523            | FALSE      | Photoreceptor           |
| AAACGCT  | db/m1   | db/m        | 944     | 0.030318      | FALSE               | 1.374291            | FALSE      | Photoreceptor           |
| AAACGCT  | db/m1   | db/m        | 451     | 0.076994      | FALSE               | 12.61538            | TRUE       |                         |
| AAACGCT  | db/m1   | db/m        | 682     | 0.095727      | FALSE               | 24.8366             | TRUE       |                         |
| AAACGCT  | db/m1   | db/m        | 1056    | 0.006499      | FALSE               | 1.384633            | FALSE      | Endothelia Capillary EC |
| AAAGAAC  | db/m1   | db/m        | 863     | 0.023266      | FALSE               | 0.966774            | FALSE      | Photoreceptor           |
| AAAGAAC  | db/m1   | db/m        | 660     | 0.054795      | FALSE               | 1.627214            | FALSE      | Photoreceptor           |
| AAAGAAC  | db/m1   | db/m        | 4439    | 0.088776      | FALSE               | 1.066561            | FALSE      | Photoreceptor           |
| AAAGAAC  | db/m1   | db/m        | 597     | 0.054795      | FALSE               | 3.287744            | FALSE      | Muller cell             |
| AAAGAAC  | db/m1   | db/m        | 1524    | 0.14163       | TRUE                | 3.831982            | FALSE      |                         |
| AAAGAAC  | db/m1   | db/m        | 1517    | 0.013338      | FALSE               | 1.288117            | FALSE      | Endothelia Capillary EC |
| AAAGGAT  | db/m1   | db/m        | 7065    | 0.016181      | FALSE               | 0.976356            | FALSE      | Photoreceptor           |
| AAAGGAT  | db/m1   | db/m        | 7779    | 0.014997      | FALSE               | 0.667711            | FALSE      | Photoreceptor           |
| AAAGGAT  | db/m1   | db/m        | 1200    | 0.009712      | FALSE               | 2.022972            | FALSE      | Pericyte                |
| AAAGGAT  | db/m1   | db/m        | 795     | 0.016181      | FALSE               | 0.573975            | FALSE      | Photoreceptor           |
| AAAGGAT  | db/m1   | db/m        | 1974    | 0.071958      | FALSE               | 2.300601            | FALSE      | Photoreceptor           |
| AAAGGAT  | db/m1   | db/m        | 4572    | 0.011805      | FALSE               | 1.310462            | FALSE      | Photoreceptor           |
| AAAGGAT  | db/m1   | db/m        | 2904    | 0.014429      | FALSE               | 1.307312            | FALSE      | Endothelia Capillary EC |
| AAAGGAT  | db/m1   | db/m        | 564     | 0.007058      | FALSE               | 1.854726            | FALSE      | Endothelia Capillary EC |
| AAAGGAT  | db/m1   | db/m        | 8164    | 0.088776      | FALSE               | 0.687808            | FALSE      | Photoreceptor           |
| AAAGGGC  | db/m1   | db/m        | 2099    | 0.031411      | FALSE               | 1.142262            | FALSE      | Endothelia Capillary EC |
| AAAGGGC  | db/m1   | db/m        | 3521    | 0.064568      | FALSE               | 1.446637            | FALSE      | Photoreceptor           |
| AAAGGGC  | db/m1   | db/m        | 3766    | 0.036232      | FALSE               | 1.182147            | FALSE      | Photoreceptor           |
| AAAGGGC  | db/m1   | db/m        | 394     | 0.037564      | FALSE               | 3.740458            | FALSE      | Muller cell             |

|                |      |      |          |       |          |       |                        |
|----------------|------|------|----------|-------|----------|-------|------------------------|
| AAAGGGC db/m1  | db/m | 692  | 0.04192  | FALSE | 1.252599 | FALSE | Muller cell            |
| AAAGGGC db/m1  | db/m | 3157 | 0.024971 | FALSE | 1.239689 | FALSE | Photoreceptor          |
| AAAGGGC db/m1  | db/m | 1334 | 0.015879 | FALSE | 1.654247 | FALSE | Photoreceptor          |
| AAAGGGC db/m1  | db/m | 343  | 0.088776 | FALSE | 4.83941  | FALSE | Muller cell            |
| AAAGGGC db/m1  | db/m | 2685 | 0.064568 | FALSE | 1.701572 | FALSE | Photoreceptor          |
| AAAGGTA db/m1  | db/m | 1265 | 0.021286 | FALSE | 0.9878   | FALSE | Photoreceptor          |
| AAAGGTA db/m1  | db/m | 2455 | 0.012557 | FALSE | 1.650248 | FALSE | Endothelia Capillary E |
| AAAGGTA db/m1  | db/m | 1764 | 0.065957 | FALSE | 1.257188 | FALSE | Photoreceptor          |
| AAAGGTA db/m1  | db/m | 574  | 0.022059 | FALSE | 1.044546 | FALSE | Photoreceptor          |
| AAAGGTA db/m1  | db/m | 2902 | 0.040404 | FALSE | 1.235294 | FALSE | Pericyte               |
| AAAGGTA db/m1  | db/m | 4102 | 0.060641 | FALSE | 1.075405 | FALSE | Photoreceptor          |
| AAAGTCC db/m1  | db/m | 8417 | 0.065957 | FALSE | 0.635233 | FALSE | Photoreceptor          |
| AAAGTGA db/m1  | db/m | 8542 | 0.013876 | FALSE | 0.913763 | FALSE | Photoreceptor          |
| AAAGTGA db/m1  | db/m | 538  | 0.007441 | FALSE | 3.054266 | FALSE | Endothelia Capillary E |
| AAAGTGA db/m1  | db/m | 5078 | 0.022455 | FALSE | 0.98645  | FALSE | Endothelia Capillary E |
| AAAGTGA db/m1  | db/m | 1190 | 0.018761 | FALSE | 2.155033 | FALSE | Photoreceptor          |
| AAAGTGA db/m1  | db/m | 535  | 0.076994 | FALSE | 3.249937 | FALSE | Photoreceptor          |
| AAAGTGA db/m1  | db/m | 6880 | 0.025416 | FALSE | 0.967684 | FALSE | Photoreceptor          |
| AAAGTGA db/m1  | db/m | 3813 | 0.026328 | FALSE | 0.744302 | FALSE | Photoreceptor          |
| AAATGGA db/m1  | db/m | 1469 | 0.143776 | TRUE  | 2.882742 | FALSE |                        |
| AAATGGA db/m1  | db/m | 1050 | 0.015581 | FALSE | 1.994565 | FALSE | Endothelia Capillary E |
| AAATGGA db/m1  | db/m | 2645 | 0.051646 | FALSE | 0.953395 | FALSE | Neuron                 |
| AACAAAG db/m1  | db/m | 4490 | 0.014711 | FALSE | 1.084102 | FALSE | Photoreceptor          |
| AACAAAG db/m1  | db/m | 1247 | 0.078788 | FALSE | 9.443912 | TRUE  |                        |
| AACAAAG db/m1  | db/m | 5591 | 0.019106 | FALSE | 0.8457   | FALSE | Photoreceptor          |
| AACAAAG db/m1  | db/m | 1729 | 0.064568 | FALSE | 2.550308 | FALSE | Photoreceptor          |
| AACAAAG db/m1  | db/m | 362  | 0.05065  | FALSE | 55.51437 | TRUE  |                        |
| AACAAAG db/m1  | db/m | 2586 | 0.034334 | FALSE | 1.216891 | FALSE | Photoreceptor          |
| AACAAAG db/m1  | db/m | 3821 | 0.070386 | FALSE | 0.994873 | FALSE | Photoreceptor          |
| AACAAAG db/m1  | db/m | 847  | 0.01981  | FALSE | 1.391297 | FALSE | Neuron                 |
| AACAAAG db/m1  | db/m | 4503 | 0.017114 | FALSE | 1.031209 | FALSE | Endothelia Aterial EC  |
| AACAACC db/m1  | db/m | 5750 | 0.007249 | FALSE | 0.92272  | FALSE | Photoreceptor          |
| AACAACC db/m1  | db/m | 5428 | 0.036891 | FALSE | 1.176967 | FALSE | Photoreceptor          |
| AACAACC db/m1  | db/m | 3974 | 0.014997 | FALSE | 1.184004 | FALSE | Photoreceptor          |
| AACAACC db/m1  | db/m | 4516 | 0.057037 | FALSE | 1.230246 | FALSE | Photoreceptor          |
| AACAACC db/m1  | db/m | 804  | 0.08663  | FALSE | 13.20031 | TRUE  |                        |
| AACAACCT db/m1 | db/m | 3261 | 0.057037 | FALSE | 1.378657 | FALSE | Photoreceptor          |
| AACAAGA db/m1  | db/m | 3466 | 0.045165 | FALSE | 1.476921 | FALSE | Photoreceptor          |
| AACAAGA db/m1  | db/m | 651  | 0.031411 | FALSE | 3.299771 | FALSE | Muller cell            |
| AACACACC db/m1 | db/m | 416  | 0.028754 | FALSE | 2.387282 | FALSE | Photoreceptor          |
| AACACACC db/m1 | db/m | 538  | 0.013338 | FALSE | 3.571981 | FALSE | Endothelia Capillary E |
| AACACACC db/m1 | db/m | 5457 | 0.218615 | TRUE  | 11.18584 | TRUE  |                        |
| AACACACC db/m1 | db/m | 4273 | 0.021669 | FALSE | 1.267838 | FALSE | Photoreceptor          |
| AACACACC db/m1 | db/m | 1693 | 0.017434 | FALSE | 1.690026 | FALSE | Endothelia Capillary E |
| AACACACT db/m1 | db/m | 1386 | 0.019106 | FALSE | 1.338597 | FALSE | Endothelia Capillary E |
| AACACACT db/m1 | db/m | 2446 | 0.032546 | FALSE | 1.207093 | FALSE | Photoreceptor          |
| AACAGGG db/m1  | db/m | 1421 | 0.018761 | FALSE | 1.094108 | FALSE | Endothelia Aterial EC  |

|                |      |      |          |       |          |       |                        |
|----------------|------|------|----------|-------|----------|-------|------------------------|
| AACAGGG db/m1  | db/m | 1010 | 0.047807 | FALSE | 17.97005 | TRUE  |                        |
| AACAGGG db/m1  | db/m | 3609 | 0.029266 | FALSE | 1.775528 | FALSE | Neuron                 |
| AACAGGG db/m1  | db/m | 1106 | 0.013074 | FALSE | 2.289989 | FALSE | Endothelia Capillary E |
| AACAGGG db/m1  | db/m | 3703 | 0.037564 | FALSE | 1.525215 | FALSE | Photoreceptor          |
| AACAGGG db/m1  | db/m | 1654 | 0.059406 | FALSE | 1.993579 | FALSE | Photoreceptor          |
| AACAGGG db/m1  | db/m | 3156 | 0.098234 | FALSE | 2.03325  | FALSE | Muller cell            |
| AACAGGG db/m1  | db/m | 1000 | 0.04192  | FALSE | 1.992036 | FALSE | Photoreceptor          |
| AACAGGG db/m1  | db/m | 466  | 0.009493 | FALSE | 2.044723 | FALSE | Photoreceptor          |
| AACAGGG db/m1  | db/m | 1230 | 0.029787 | FALSE | 1.025095 | FALSE | Photoreceptor          |
| AACCAAC db/m1  | db/m | 443  | 0.028754 | FALSE | 1.455276 | FALSE | Photoreceptor          |
| AACCAAC db/m1  | db/m | 841  | 0.047807 | FALSE | 1.790763 | FALSE | Endothelia Capillary E |
| AACCAAC db/m1  | db/m | 1881 | 0.063221 | FALSE | 17.43975 | TRUE  |                        |
| AACCAAC db/m1  | db/m | 344  | 0.119124 | TRUE  | 15.95745 | TRUE  |                        |
| AACCAACT db/m1 | db/m | 6886 | 0.026796 | FALSE | 0.711428 | FALSE | Photoreceptor          |
| AACCAACT db/m1 | db/m | 5185 | 0.025416 | FALSE | 1.088774 | FALSE | Photoreceptor          |
| AACCACAC db/m1 | db/m | 5592 | 0.075259 | FALSE | 1.151886 | FALSE | Endothelia Venous EC   |
| AACCACAC db/m1 | db/m | 4556 | 0.024534 | FALSE | 0.966651 | FALSE | Endothelia Venous EC   |
| AACCACAT db/m1 | db/m | 585  | 0.138889 | TRUE  | 14.41144 | TRUE  |                        |
| AACCACAT db/m1 | db/m | 656  | 0.022857 | FALSE | 2.208175 | FALSE | Photoreceptor          |
| AACCATG db/m1  | db/m | 510  | 0.016799 | FALSE | 2.59568  | FALSE | Photoreceptor          |
| AACCATG db/m1  | db/m | 540  | 0.041154 | FALSE | 52.34944 | TRUE  |                        |
| AACCATG db/m1  | db/m | 1432 | 0.040404 | FALSE | 1.774821 | FALSE | Photoreceptor          |
| AACCATG db/m1  | db/m | 4135 | 0.030859 | FALSE | 1.141635 | FALSE | Endothelia Capillary E |
| AACCATG db/m1  | db/m | 2772 | 0.012052 | FALSE | 1.271615 | FALSE | Endothelia Venous EC   |
| AACCATG db/m1  | db/m | 2999 | 0.012557 | FALSE | 1.021245 | FALSE | Endothelia Capillary E |
| AACCATGT db/m1 | db/m | 1379 | 0.022857 | FALSE | 0.717658 | FALSE | Photoreceptor          |
| AACCCAA db/m1  | db/m | 7493 | 0.028754 | FALSE | 1.150267 | FALSE | Photoreceptor          |
| AACCCAA db/m1  | db/m | 7994 | 0.024971 | FALSE | 0.7847   | FALSE | Photoreceptor          |
| AACCCAA db/m1  | db/m | 855  | 0.041154 | FALSE | 1.472064 | FALSE | Photoreceptor          |
| AACCCAA db/m1  | db/m | 4263 | 0.049679 | FALSE | 1.290778 | FALSE | Photoreceptor          |
| AACCCAA db/m1  | db/m | 829  | 0.109375 | TRUE  | 10.53412 | TRUE  |                        |
| AACCCAA db/m1  | db/m | 5546 | 0.019106 | FALSE | 1.159348 | FALSE | Photoreceptor          |
| AACCCAAT db/m1 | db/m | 626  | 0.038251 | FALSE | 0.876566 | FALSE | Photoreceptor          |
| AACCCAAT db/m1 | db/m | 6406 | 0.014997 | FALSE | 1.086432 | FALSE | Photoreceptor          |
| AACCCAAT db/m1 | db/m | 2135 | 0.063221 | FALSE | 1.156258 | FALSE | Photoreceptor          |
| AACCTGA db/m1  | db/m | 1163 | 0.020171 | FALSE | 0.764028 | FALSE | Photoreceptor          |
| AACCTGA db/m1  | db/m | 3068 | 0.027758 | FALSE | 1.010486 | FALSE | Endothelia Capillary E |
| AACCTGA db/m1  | db/m | 8531 | 0.034954 | FALSE | 0.713536 | FALSE | Photoreceptor          |
| AACCTGA db/m1  | db/m | 1428 | 0.098234 | FALSE | 1.964607 | FALSE | Photoreceptor          |
| AACCTGAC db/m1 | db/m | 3555 | 0.03313  | FALSE | 1.314809 | FALSE | Endothelia Venous EC   |
| AACCTGAT db/m1 | db/m | 5571 | 0.013074 | FALSE | 1.005731 | FALSE | Photoreceptor          |
| AACCTGAT db/m1 | db/m | 900  | 0.030859 | FALSE | 0.617709 | FALSE | Photoreceptor          |
| AACCTTTA db/m1 | db/m | 1299 | 0.058205 | FALSE | 0.583375 | FALSE | Photoreceptor          |
| AACCTTTA db/m1 | db/m | 1451 | 0.028251 | FALSE | 2.444947 | FALSE | Pericyte               |
| AACCTTTA db/m1 | db/m | 1689 | 0.037564 | FALSE | 1.714668 | FALSE | Endothelia Capillary E |
| AACCTTTA db/m1 | db/m | 1024 | 0.036891 | FALSE | 0.745422 | FALSE | Photoreceptor          |
| AACCTTTC db/m1 | db/m | 578  | 0.038251 | FALSE | 3.623988 | FALSE | Muller cell            |

|                |      |      |          |       |          |       |                        |
|----------------|------|------|----------|-------|----------|-------|------------------------|
| AACCTTTG db/m1 | db/m | 3559 | 0.075259 | FALSE | 1.571977 | FALSE | Photoreceptor          |
| AACCTTTT db/m1 | db/m | 1226 | 0.036891 | FALSE | 1.713078 | FALSE | Pericyte               |
| AACCTTTT db/m1 | db/m | 4329 | 0.03313  | FALSE | 1.060376 | FALSE | Photoreceptor          |
| AACCTTTT db/m1 | db/m | 419  | 0.019106 | FALSE | 3.972948 | FALSE | Muller cell            |
| AACGAAA db/m1  | db/m | 3438 | 0.024971 | FALSE | 1.25088  | FALSE | Endothelia Capillary E |
| AACGAAA db/m1  | db/m | 5623 | 0.054795 | FALSE | 0.962467 | FALSE | Endothelia Capillary E |
| AACGAAA db/m1  | db/m | 2022 | 0.024105 | FALSE | 1.214205 | FALSE | Endothelia Aterial EC  |
| AACGAAA db/m1  | db/m | 953  | 0.021286 | FALSE | 1.026343 | FALSE | Photoreceptor          |
| AACGAAA db/m1  | db/m | 598  | 0.061912 | FALSE | 3.334003 | FALSE | Photoreceptor          |
| AACGAAA db/m1  | db/m | 6326 | 0.006137 | FALSE | 0.983626 | FALSE | Photoreceptor          |
| AACGAAA db/m1  | db/m | 9255 | 0.013074 | FALSE | 0.804507 | FALSE | Photoreceptor          |
| AACGGGA db/m1  | db/m | 4869 | 0.040404 | FALSE | 0.709321 | FALSE | Photoreceptor          |
| AACGGGA db/m1  | db/m | 797  | 0.018761 | FALSE | 3.794002 | FALSE | Muller cell            |
| AACGGGA db/m1  | db/m | 2118 | 0.057037 | FALSE | 1.105467 | FALSE | Photoreceptor          |
| AACGGGA db/m1  | db/m | 398  | 0.065957 | FALSE | 13.85435 | TRUE  |                        |
| AACGGGA db/m1  | db/m | 686  | 0.052669 | FALSE | 3.214987 | FALSE | Muller cell            |
| AACGGGA db/m1  | db/m | 2261 | 0.031411 | FALSE | 1.30592  | FALSE | Endothelia Venous EC   |
| AACGGGA db/m1  | db/m | 1085 | 0.038953 | FALSE | 1.743355 | FALSE | Photoreceptor          |
| AACGGGA db/m1  | db/m | 5044 | 0.008438 | FALSE | 1.078586 | FALSE | Photoreceptor          |
| AACGTCA db/m1  | db/m | 3443 | 0.028251 | FALSE | 1.35301  | FALSE | Photoreceptor          |
| AACGTCA db/m1  | db/m | 2046 | 0.048732 | FALSE | 1.6901   | FALSE | Photoreceptor          |
| AACGTCA db/m1  | db/m | 1930 | 0.054795 | FALSE | 1.371727 | FALSE | Photoreceptor          |
| AACGTCA db/m1  | db/m | 1366 | 0.143501 | TRUE  | 2.019844 | FALSE |                        |
| AACGTCA db/m1  | db/m | 1610 | 0.05065  | FALSE | 0.755608 | FALSE | Photoreceptor          |
| AACGTCA db/m1  | db/m | 641  | 0.035586 | FALSE | 2.335033 | FALSE | Pericyte               |
| AACGTCA db/m1  | db/m | 2094 | 0.026328 | FALSE | 1.272036 | FALSE | Endothelia Capillary E |
| AACGTCA db/m1  | db/m | 8893 | 0.008644 | FALSE | 0.839314 | FALSE | Photoreceptor          |
| AACTTCTA db/m1 | db/m | 3030 | 0.076994 | FALSE | 1.313502 | FALSE | Photoreceptor          |
| AACTTCTA db/m1 | db/m | 981  | 0.065957 | FALSE | 1.200222 | FALSE | Neuron                 |
| AACTTCTG db/m1 | db/m | 8445 | 0.036232 | FALSE | 0.686606 | FALSE | Photoreceptor          |
| AACTTCTG db/m1 | db/m | 4895 | 0.026328 | FALSE | 1.191399 | FALSE | Photoreceptor          |
| AACTTCTG db/m1 | db/m | 515  | 0.028251 | FALSE | 3.043094 | FALSE | Photoreceptor          |
| AACTTCTG db/m1 | db/m | 408  | 0.040404 | FALSE | 3.240797 | FALSE | Endothelia Capillary E |
| AACTTCTT db/m1 | db/m | 1075 | 0.046025 | FALSE | 2.123347 | FALSE | Photoreceptor          |
| AACTTCTT db/m1 | db/m | 2331 | 0.022455 | FALSE | 1.392879 | FALSE | Endothelia Capillary E |
| AACTTCTT db/m1 | db/m | 2347 | 0.046025 | FALSE | 1.499294 | FALSE | Photoreceptor          |
| AACTTCTT db/m1 | db/m | 3329 | 0.046906 | FALSE | 1.2067   | FALSE | Endothelia Capillary E |
| AAGAACA db/m1  | db/m | 1576 | 0.036232 | FALSE | 1.148178 | FALSE | Photoreceptor          |
| AAGAACA db/m1  | db/m | 1806 | 0.023682 | FALSE | 1.202089 | FALSE | Endothelia Aterial EC  |
| AAGAACA db/m1  | db/m | 1271 | 0.015879 | FALSE | 1.291429 | FALSE | Endothelia Aterial EC  |
| AAGAACA db/m1  | db/m | 5919 | 0.019106 | FALSE | 1.244253 | FALSE | Photoreceptor          |
| AAGAACA db/m1  | db/m | 1887 | 0.065957 | FALSE | 12.73477 | TRUE  |                        |
| AAGAACA db/m1  | db/m | 2200 | 0.009063 | FALSE | 1.456305 | FALSE | Neuron                 |
| AAGAACA db/m1  | db/m | 1498 | 0.034334 | FALSE | 1.118467 | FALSE | Photoreceptor          |
| AAGAACA db/m1  | db/m | 4270 | 0.070386 | FALSE | 1.449416 | FALSE | Photoreceptor          |
| AAGAACA db/m1  | db/m | 627  | 0.032546 | FALSE | 4.885742 | FALSE | Muller cell            |
| AAGAACA db/m1  | db/m | 767  | 0.027758 | FALSE | 1.112065 | FALSE | Photoreceptor          |

|                |      |      |          |       |          |       |                        |
|----------------|------|------|----------|-------|----------|-------|------------------------|
| AAGACAA/ db/m1 | db/m | 1430 | 0.030318 | FALSE | 1.516227 | FALSE | Endothelia Capillary E |
| AAGACAA/ db/m1 | db/m | 929  | 0.075259 | FALSE | 1.584068 | FALSE | Photoreceptor          |
| AAGACAA( db/m1 | db/m | 477  | 0.013876 | FALSE | 3.42809  | FALSE | Photoreceptor          |
| AAGACAA( db/m1 | db/m | 6165 | 0.054795 | FALSE | 1.085589 | FALSE | Photoreceptor          |
| AAGACAA( db/m1 | db/m | 3233 | 0.025416 | FALSE | 1.108502 | FALSE | Endothelia Venous EC   |
| AAGACAA^ db/m1 | db/m | 4821 | 0.159016 | TRUE  | 8.964823 | TRUE  |                        |
| AAGACAA^ db/m1 | db/m | 1084 | 0.126437 | TRUE  | 3.101169 | FALSE |                        |
| AAGACTC/ db/m1 | db/m | 1472 | 0.034954 | FALSE | 0.834969 | FALSE | Photoreceptor          |
| AAGACTC/ db/m1 | db/m | 1171 | 0.057037 | FALSE | 1.338196 | FALSE | Photoreceptor          |
| AAGACTC/ db/m1 | db/m | 1914 | 0.049679 | FALSE | 0.906539 | FALSE | Photoreceptor          |
| AAGACTC/ db/m1 | db/m | 556  | 0.296296 | TRUE  | 4.150454 | FALSE |                        |
| AAGACTC/ db/m1 | db/m | 954  | 0.017758 | FALSE | 0.588095 | FALSE | Photoreceptor          |
| AAGACTCC db/m1 | db/m | 573  | 0.209157 | TRUE  | 18.65285 | TRUE  |                        |
| AAGACTCC db/m1 | db/m | 830  | 0.024971 | FALSE | 2.326517 | FALSE | Endothelia Venous EC   |
| AAGACTCT db/m1 | db/m | 2325 | 0.091004 | FALSE | 15.92151 | TRUE  |                        |
| AAGACTCT db/m1 | db/m | 1754 | 0.018761 | FALSE | 0.626707 | FALSE | Photoreceptor          |
| AAGACTCT db/m1 | db/m | 1650 | 0.021669 | FALSE | 0.800988 | FALSE | Photoreceptor          |
| AAGATAG/ db/m1 | db/m | 415  | 0.024971 | FALSE | 1.453425 | FALSE | Photoreceptor          |
| AAGATAG/ db/m1 | db/m | 1950 | 0.051646 | FALSE | 1.64775  | FALSE | Photoreceptor          |
| AAGATAG( db/m1 | db/m | 606  | 0.009063 | FALSE | 0.90841  | FALSE | Photoreceptor          |
| AAGATAG( db/m1 | db/m | 1196 | 0.054795 | FALSE | 1.607881 | FALSE | Photoreceptor          |
| AAGATAG^ db/m1 | db/m | 670  | 0.084562 | FALSE | 2.258224 | FALSE | Photoreceptor          |
| AAGATAG^ db/m1 | db/m | 1109 | 0.049679 | FALSE | 2.310219 | FALSE | Photoreceptor          |
| AAGCATC/ db/m1 | db/m | 3873 | 0.038953 | FALSE | 0.934852 | FALSE | Photoreceptor          |
| AAGCATC/ db/m1 | db/m | 848  | 0.042704 | FALSE | 1.038085 | FALSE | Photoreceptor          |
| AAGCATCC db/m1 | db/m | 2219 | 0.043505 | FALSE | 1.42005  | FALSE | Endothelia Venous EC   |
| AAGCATCC db/m1 | db/m | 1147 | 0.046025 | FALSE | 1.826602 | FALSE | Photoreceptor          |
| AAGCATCC db/m1 | db/m | 1178 | 0.021286 | FALSE | 1.711996 | FALSE | Endothelia Capillary E |
| AAGCCAT/ db/m1 | db/m | 5799 | 0.033726 | FALSE | 0.872802 | FALSE | Photoreceptor          |
| AAGCCAT/ db/m1 | db/m | 783  | 0.008234 | FALSE | 0.807225 | FALSE | Photoreceptor          |
| AAGCCAT( db/m1 | db/m | 518  | 0.13452  | TRUE  | 20.671   | TRUE  |                        |
| AAGCGAG/ db/m1 | db/m | 6085 | 0.445833 | TRUE  | 4.51445  | FALSE |                        |
| AAGCGAG/ db/m1 | db/m | 3894 | 0.048732 | FALSE | 1.297216 | FALSE | Photoreceptor          |
| AAGCGAG/ db/m1 | db/m | 1870 | 0.095727 | FALSE | 8.599717 | TRUE  |                        |
| AAGCGAG/ db/m1 | db/m | 694  | 0.027273 | FALSE | 2.930566 | FALSE | Muller cell            |
| AAGCGAG/ db/m1 | db/m | 1100 | 0.063221 | FALSE | 1.552199 | FALSE | Photoreceptor          |
| AAGCGAG^ db/m1 | db/m | 3813 | 0.045165 | FALSE | 1.379419 | FALSE | Endothelia Venous EC   |
| AAGCGAG^ db/m1 | db/m | 5061 | 0.088776 | FALSE | 1.08916  | FALSE | Endothelia Capillary E |
| AAGCGAG^ db/m1 | db/m | 5382 | 0.153234 | TRUE  | 2.481111 | FALSE |                        |
| AAGCGAG^ db/m1 | db/m | 6906 | 0.017114 | FALSE | 0.91093  | FALSE | Photoreceptor          |
| AAGCGTT( db/m1 | db/m | 6664 | 0.009712 | FALSE | 1.006446 | FALSE | Photoreceptor          |
| AAGCGTT( db/m1 | db/m | 3868 | 0.060641 | FALSE | 1.184399 | FALSE | Photoreceptor          |
| AAGCGTT( db/m1 | db/m | 401  | 0.112477 | TRUE  | 1.901141 | FALSE |                        |
| AAGCGTT/ db/m1 | db/m | 662  | 0.109375 | TRUE  | 24.54467 | TRUE  |                        |
| AAGGAAT/ db/m1 | db/m | 864  | 0.064568 | FALSE | 2.712862 | FALSE | Muller cell            |
| AAGGAAT/ db/m1 | db/m | 7084 | 0.067388 | FALSE | 0.826822 | FALSE | Photoreceptor          |
| AAGGAAT/ db/m1 | db/m | 1147 | 0.019106 | FALSE | 2.146936 | FALSE | Microglia              |

|                |      |      |          |       |          |       |                        |
|----------------|------|------|----------|-------|----------|-------|------------------------|
| AAGGAAT(db/m1  | db/m | 508  | 0.061912 | FALSE | 4.967213 | FALSE | Muller cell            |
| AAGGAAT(db/m1  | db/m | 2961 | 0.024534 | FALSE | 1.279904 | FALSE | Photoreceptor          |
| AAGGAAT(db/m1  | db/m | 5562 | 0.038251 | FALSE | 0.897425 | FALSE | Endothelia Venous EC   |
| AAGGAAT(db/m1  | db/m | 704  | 0.021286 | FALSE | 1.484607 | FALSE | Photoreceptor          |
| AAGGAAT(db/m1  | db/m | 3419 | 0.020171 | FALSE | 1.64091  | FALSE | Photoreceptor          |
| AAGGAAT db/m1  | db/m | 8285 | 0.024534 | FALSE | 0.636383 | FALSE | Photoreceptor          |
| AAGGAAT db/m1  | db/m | 3188 | 0.018088 | FALSE | 1.220761 | FALSE | Endothelia Capillary E |
| AAGGAAT db/m1  | db/m | 863  | 0.012557 | FALSE | 0.585706 | FALSE | Photoreceptor          |
| AAGGTAA db/m1  | db/m | 2952 | 0.043505 | FALSE | 1.606413 | FALSE | Photoreceptor          |
| AAGGTAA db/m1  | db/m | 2285 | 0.029787 | FALSE | 1.137076 | FALSE | Photoreceptor          |
| AAGGTAA db/m1  | db/m | 528  | 0.045165 | FALSE | 4.665941 | FALSE | Muller cell            |
| AAGGTAA db/m1  | db/m | 5324 | 0.032546 | FALSE | 0.925703 | FALSE | Photoreceptor          |
| AAGGTAA db/m1  | db/m | 4300 | 0.065957 | FALSE | 1.098381 | FALSE | Photoreceptor          |
| AAGGTAA db/m1  | db/m | 1929 | 0.073582 | FALSE | 1.595502 | FALSE | Photoreceptor          |
| AAGGTAA db/m1  | db/m | 6085 | 0.029787 | FALSE | 0.96228  | FALSE | Photoreceptor          |
| AAGGTAA db/m1  | db/m | 2751 | 0.17103  | TRUE  | 11.7926  | TRUE  |                        |
| AAGGTAA db/m1  | db/m | 840  | 0.026328 | FALSE | 0.740357 | FALSE | Photoreceptor          |
| AAGGTAA db/m1  | db/m | 1128 | 0.060641 | FALSE | 2.785539 | FALSE | Photoreceptor          |
| AAGTACC db/m1  | db/m | 1492 | 0.041154 | FALSE | 36.41443 | TRUE  |                        |
| AAGTACC db/m1  | db/m | 3222 | 0.013338 | FALSE | 1.060514 | FALSE | Photoreceptor          |
| AAGTACC db/m1  | db/m | 1272 | 0.049679 | FALSE | 1.70079  | FALSE | Photoreceptor          |
| AAGTACC db/m1  | db/m | 381  | 0.030318 | FALSE | 1.350284 | FALSE | Photoreceptor          |
| AAGTACC db/m1  | db/m | 3148 | 0.030859 | FALSE | 0.923535 | FALSE | Photoreceptor          |
| AAGTACCT db/m1 | db/m | 2095 | 0.027273 | FALSE | 0.950606 | FALSE | Photoreceptor          |
| AAGTACCT db/m1 | db/m | 5581 | 0.047807 | FALSE | 0.917654 | FALSE | Photoreceptor          |
| AAGTCGT db/m1  | db/m | 750  | 0.040404 | FALSE | 1.980657 | FALSE | Photoreceptor          |
| AAGTCGT db/m1  | db/m | 4080 | 0.122691 | TRUE  | 4.912675 | FALSE |                        |
| AAGTGAA db/m1  | db/m | 1709 | 0.003196 | FALSE | 0.773643 | FALSE | Neuron                 |
| AAGTGAA db/m1  | db/m | 1864 | 0.010614 | FALSE | 1.42617  | FALSE | Endothelia Capillary E |
| AAGTGAA db/m1  | db/m | 6867 | 0.020171 | FALSE | 0.886411 | FALSE | Photoreceptor          |
| AAGTGAA db/m1  | db/m | 547  | 0.063221 | FALSE | 1.42448  | FALSE | Photoreceptor          |
| AAGTGAA db/m1  | db/m | 1583 | 0.075259 | FALSE | 25.53568 | TRUE  |                        |
| AAGTGAA db/m1  | db/m | 428  | 0.018761 | FALSE | 1.589493 | FALSE | Photoreceptor          |
| AAGTGAA db/m1  | db/m | 8271 | 0.588076 | TRUE  | 2.619746 | FALSE |                        |
| AAGTTCG db/m1  | db/m | 1379 | 0.012557 | FALSE | 1.271754 | FALSE | Photoreceptor          |
| AAGTTCG db/m1  | db/m | 1603 | 0.021286 | FALSE | 1.276938 | FALSE | Endothelia Capillary E |
| AAGTTCG db/m1  | db/m | 1083 | 0.058205 | FALSE | 0.917494 | FALSE | Photoreceptor          |
| AAGTTCG db/m1  | db/m | 832  | 0.037564 | FALSE | 3.669424 | FALSE | Muller cell            |
| AAGTTCG db/m1  | db/m | 3245 | 0.073582 | FALSE | 1.444767 | FALSE | Endothelia Capillary E |
| AAGTTCG db/m1  | db/m | 361  | 0.028754 | FALSE | 4.059818 | FALSE | Photoreceptor          |
| AAGTTCG db/m1  | db/m | 6613 | 0.006683 | FALSE | 0.962117 | FALSE | Photoreceptor          |
| AAGTTCGT db/m1 | db/m | 767  | 0.029787 | FALSE | 0.937615 | FALSE | Photoreceptor          |
| AATAGAG db/m1  | db/m | 3499 | 0.045165 | FALSE | 0.98971  | FALSE | Photoreceptor          |
| AATAGAG db/m1  | db/m | 4042 | 0.05065  | FALSE | 1.093245 | FALSE | Photoreceptor          |
| AATAGAG db/m1  | db/m | 1727 | 0.036232 | FALSE | 0.968483 | FALSE | Photoreceptor          |
| AATAGAG db/m1  | db/m | 3320 | 0.076994 | FALSE | 1.456026 | FALSE | Endothelia Venous EC   |
| AATAGAG db/m1  | db/m | 3816 | 0.020908 | FALSE | 1.081963 | FALSE | Endothelia Venous EC   |

|         |       |      |      |          |       |          |       |                        |
|---------|-------|------|------|----------|-------|----------|-------|------------------------|
| AATAGAG | db/m1 | db/m | 2350 | 0.485327 | TRUE  | 6.745941 | TRUE  |                        |
| AATAGAG | db/m1 | db/m | 683  | 0.082569 | FALSE | 4.270516 | FALSE | Muller cell            |
| AATAGAG | db/m1 | db/m | 1491 | 0.031411 | FALSE | 0.86567  | FALSE | Photoreceptor          |
| AATAGAG | db/m1 | db/m | 5995 | 0.028754 | FALSE | 1.123469 | FALSE | Photoreceptor          |
| AATAGAG | db/m1 | db/m | 5447 | 0.026796 | FALSE | 0.896651 | FALSE | Photoreceptor          |
| AATAGAG | db/m1 | db/m | 2024 | 0.036891 | FALSE | 1.375296 | FALSE | Photoreceptor          |
| AATCACG | db/m1 | db/m | 6522 | 0.042704 | FALSE | 0.837302 | FALSE | Photoreceptor          |
| AATCACG | db/m1 | db/m | 6459 | 0.021669 | FALSE | 0.999715 | FALSE | Photoreceptor          |
| AATCACG | db/m1 | db/m | 516  | 0.070386 | FALSE | 3.227644 | FALSE | Muller cell            |
| AATCACG | db/m1 | db/m | 664  | 0.044326 | FALSE | 8.872651 | TRUE  |                        |
| AATCACG | db/m1 | db/m | 1986 | 0.025416 | FALSE | 1.681182 | FALSE | Endothelia Capillary E |
| AATCACG | db/m1 | db/m | 996  | 0.057037 | FALSE | 1.850605 | FALSE | Photoreceptor          |
| AATCGAC | db/m1 | db/m | 4126 | 0.051646 | FALSE | 1.096322 | FALSE | Endothelia Venous EC   |
| AATCGAC | db/m1 | db/m | 3205 | 0.031973 | FALSE | 1.303377 | FALSE | Neuron                 |
| AATCGAC | db/m1 | db/m | 5807 | 0.008644 | FALSE | 1.038258 | FALSE | Photoreceptor          |
| AATCGAC | db/m1 | db/m | 1620 | 0.049679 | FALSE | 1.558385 | FALSE | Photoreceptor          |
| AATCGAC | db/m1 | db/m | 1598 | 0.020171 | FALSE | 1.282697 | FALSE | Endothelia Capillary E |
| AATCGAC | db/m1 | db/m | 6097 | 0.115723 | TRUE  | 2.125328 | FALSE |                        |
| AATCGAC | db/m1 | db/m | 6729 | 0.067388 | FALSE | 1.001724 | FALSE | Photoreceptor          |
| AATCGAC | db/m1 | db/m | 9365 | 0.013074 | FALSE | 0.780328 | FALSE | Photoreceptor          |
| AATCGAC | db/m1 | db/m | 2489 | 0.073582 | FALSE | 3.209056 | FALSE | Muller cell            |
| AATCGAC | db/m1 | db/m | 3848 | 0.023682 | FALSE | 0.718998 | FALSE | Photoreceptor          |
| AATCGTG | db/m1 | db/m | 2167 | 0.010846 | FALSE | 0.987195 | FALSE | Endothelia Aterial EC  |
| AATCGTG | db/m1 | db/m | 802  | 0.04192  | FALSE | 1.514982 | FALSE | Photoreceptor          |
| AATCGTG | db/m1 | db/m | 1108 | 0.070386 | FALSE | 0.96576  | FALSE | Photoreceptor          |
| AATCGTG | db/m1 | db/m | 5466 | 0.029266 | FALSE | 0.865106 | FALSE | Photoreceptor          |
| AATCGTG | db/m1 | db/m | 2484 | 0.021286 | FALSE | 1.382515 | FALSE | Endothelia Capillary E |
| AATCGTG | db/m1 | db/m | 859  | 0.098234 | FALSE | 8.018504 | TRUE  |                        |
| AATGAAG | db/m1 | db/m | 4868 | 0.060641 | FALSE | 1.156721 | FALSE | Photoreceptor          |
| AATGAAG | db/m1 | db/m | 3530 | 0.037564 | FALSE | 1.182447 | FALSE | Endothelia Venous EC   |
| AATGAAG | db/m1 | db/m | 1087 | 0.029787 | FALSE | 0.933622 | FALSE | Photoreceptor          |
| AATGAAG | db/m1 | db/m | 1192 | 0.024534 | FALSE | 1.010617 | FALSE | Photoreceptor          |
| AATGAAG | db/m1 | db/m | 650  | 0.026796 | FALSE | 1.108813 | FALSE | Photoreceptor          |
| AATGAAG | db/m1 | db/m | 731  | 0.076994 | FALSE | 2.198767 | FALSE | Muller cell            |
| AATGAAG | db/m1 | db/m | 1031 | 0.041154 | FALSE | 2.395109 | FALSE | Photoreceptor          |
| AATGAAG | db/m1 | db/m | 1135 | 0.028754 | FALSE | 2.748762 | FALSE | Pericyte               |
| AATGAAG | db/m1 | db/m | 1025 | 0.03313  | FALSE | 0.955317 | FALSE | Photoreceptor          |
| AATGAAG | db/m1 | db/m | 6485 | 0.164835 | TRUE  | 6.881628 | TRUE  |                        |
| AATGACC | db/m1 | db/m | 731  | 0.012557 | FALSE | 2.830612 | FALSE | Endothelia Capillary E |
| AATGACC | db/m1 | db/m | 1340 | 0.022059 | FALSE | 1.93421  | FALSE | Endothelia Capillary E |
| AATGACC | db/m1 | db/m | 5554 | 0.082569 | FALSE | 0.915357 | FALSE | Photoreceptor          |
| AATGACC | db/m1 | db/m | 5307 | 0.020171 | FALSE | 1.076361 | FALSE | Photoreceptor          |
| AATGACC | db/m1 | db/m | 8286 | 0.010846 | FALSE | 0.899339 | FALSE | Photoreceptor          |
| AATGACC | db/m1 | db/m | 937  | 0.060641 | FALSE | 1.234273 | FALSE | Photoreceptor          |
| AATGACC | db/m1 | db/m | 381  | 0.24     | TRUE  | 8.133086 | TRUE  |                        |
| AATGACC | db/m1 | db/m | 6930 | 0.017114 | FALSE | 0.855481 | FALSE | Photoreceptor          |
| AATGACC | db/m1 | db/m | 1114 | 0.021669 | FALSE | 1.050805 | FALSE | Photoreceptor          |

|                |      |      |          |       |          |       |                         |
|----------------|------|------|----------|-------|----------|-------|-------------------------|
| AATGACCT db/m1 | db/m | 7829 | 0.150727 | TRUE  | 0.920883 | FALSE |                         |
| AATGACCT db/m1 | db/m | 1308 | 0.044326 | FALSE | 1.134182 | FALSE | Photoreceptor           |
| AATGCCA db/m1  | db/m | 1473 | 0.084562 | FALSE | 2.145483 | FALSE | Pericyte                |
| AATGCCA db/m1  | db/m | 2361 | 0.019455 | FALSE | 1.440449 | FALSE | Endothelia Venous EC    |
| AATGCCA db/m1  | db/m | 1327 | 0.015879 | FALSE | 0.977917 | FALSE | Photoreceptor           |
| AATGCCA db/m1  | db/m | 3263 | 0.022059 | FALSE | 0.977571 | FALSE | Endothelia Capillary EC |
| AATGCCA db/m1  | db/m | 1856 | 0.048732 | FALSE | 1.375551 | FALSE | Photoreceptor           |
| AATGCCAT db/m1 | db/m | 2419 | 0.038251 | FALSE | 0.997886 | FALSE | Photoreceptor           |
| AATGGAA db/m1  | db/m | 5383 | 0.025416 | FALSE | 0.838948 | FALSE | Photoreceptor           |
| AATGGAA db/m1  | db/m | 407  | 0.064568 | FALSE | 3.265551 | FALSE | Endothelia Capillary EC |
| AATGGAA db/m1  | db/m | 533  | 0.052669 | FALSE | 2.010971 | FALSE | Microglia               |
| AATGGCT db/m1  | db/m | 429  | 0.029266 | FALSE | 60.81548 | TRUE  |                         |
| AATGGCT db/m1  | db/m | 1237 | 0.060641 | FALSE | 2.562477 | FALSE | Endothelia Capillary EC |
| AATGGCT db/m1  | db/m | 548  | 0.018761 | FALSE | 2.262043 | FALSE | Photoreceptor           |
| AATGGCT db/m1  | db/m | 4308 | 0.031411 | FALSE | 1.07747  | FALSE | Endothelia Capillary EC |
| AATGGCT db/m1  | db/m | 4772 | 0.026328 | FALSE | 1.110021 | FALSE | Photoreceptor           |
| AATTCCTA db/m1 | db/m | 3321 | 0.010157 | FALSE | 1.01517  | FALSE | Neuron                  |
| AATTCCTA db/m1 | db/m | 924  | 0.021669 | FALSE | 1.181565 | FALSE | Photoreceptor           |
| AATTCCTA db/m1 | db/m | 443  | 0.048732 | FALSE | 4.352322 | FALSE | Muller cell             |
| AATTCCTC db/m1 | db/m | 731  | 0.027273 | FALSE | 1.333858 | FALSE | Photoreceptor           |
| AATTCCTC db/m1 | db/m | 6964 | 0.012557 | FALSE | 0.570978 | FALSE | Photoreceptor           |
| AATTCCTC db/m1 | db/m | 374  | 0.032546 | FALSE | 2.415807 | FALSE | Microglia               |
| AATTCCTC db/m1 | db/m | 1154 | 0.018761 | FALSE | 0.631042 | FALSE | Photoreceptor           |
| AATTCCTG db/m1 | db/m | 2643 | 0.091004 | FALSE | 1.576924 | FALSE | Endothelia Capillary EC |
| AATTCCTG db/m1 | db/m | 498  | 0.13452  | TRUE  | 19.60094 | TRUE  |                         |
| AATTTCCA db/m1 | db/m | 4189 | 0.084562 | FALSE | 1.027419 | FALSE | Endothelia Aterial EC   |
| AATTTCCC db/m1 | db/m | 466  | 0.011081 | FALSE | 3.356734 | FALSE | Photoreceptor           |
| AATTTCCC db/m1 | db/m | 1429 | 0.009712 | FALSE | 1.21606  | FALSE | Endothelia Aterial EC   |
| AATTTCCC db/m1 | db/m | 2515 | 0.088776 | FALSE | 7.791292 | TRUE  |                         |
| AATTTCCC db/m1 | db/m | 802  | 0.029266 | FALSE | 4.672045 | FALSE | Muller cell             |
| AATTTCCG db/m1 | db/m | 6128 | 0.032546 | FALSE | 1.001861 | FALSE | Photoreceptor           |
| AATTTCCG db/m1 | db/m | 3528 | 0.014151 | FALSE | 1.240723 | FALSE | Neuron                  |
| AATTTCCG db/m1 | db/m | 707  | 0.049679 | FALSE | 50.42776 | TRUE  |                         |
| AATTTCCT db/m1 | db/m | 7682 | 0.011319 | FALSE | 0.92276  | FALSE | Photoreceptor           |
| AATTTCCT db/m1 | db/m | 3027 | 0.020536 | FALSE | 1.946962 | FALSE | Neuron                  |
| ACAAAGA db/m1  | db/m | 3237 | 0.029266 | FALSE | 1.378979 | FALSE | Photoreceptor           |
| ACAAAGA db/m1  | db/m | 790  | 0.04192  | FALSE | 1.248241 | FALSE | Photoreceptor           |
| ACAAAGA db/m1  | db/m | 2516 | 0.048732 | FALSE | 1.504995 | FALSE | Neuron                  |
| ACAAAGA db/m1  | db/m | 801  | 0.01981  | FALSE | 1.021284 | FALSE | Photoreceptor           |
| ACAAAGA db/m1  | db/m | 2264 | 0.028754 | FALSE | 2.611079 | FALSE | Neuron                  |
| ACAAAGA db/m1  | db/m | 1295 | 0.015581 | FALSE | 0.717381 | FALSE | Photoreceptor           |
| ACAACCAC db/m1 | db/m | 6058 | 0.031973 | FALSE | 1.097806 | FALSE | Photoreceptor           |
| ACAACCAC db/m1 | db/m | 1678 | 0.034954 | FALSE | 1.537802 | FALSE | Photoreceptor           |
| ACAACCAC db/m1 | db/m | 436  | 0.015287 | FALSE | 2.101243 | FALSE | Photoreceptor           |
| ACAACCAC db/m1 | db/m | 711  | 0.068864 | FALSE | 3.95588  | FALSE | Muller cell             |
| ACAACCAC db/m1 | db/m | 2316 | 0.023266 | FALSE | 1.084967 | FALSE | Photoreceptor           |
| ACAACCAT db/m1 | db/m | 2437 | 0.043505 | FALSE | 1.562377 | FALSE | Photoreceptor           |



|                |      |      |          |       |          |       |                        |
|----------------|------|------|----------|-------|----------|-------|------------------------|
| ACAAGCT# db/m1 | db/m | 2208 | 0.026796 | FALSE | 1.456237 | FALSE | Endothelia Venous EC   |
| ACAAGCT# db/m1 | db/m | 2153 | 0.143501 | TRUE  | 8.588549 | TRUE  |                        |
| ACAAGCT# db/m1 | db/m | 1345 | 0.038953 | FALSE | 1.470601 | FALSE | Photoreceptor          |
| ACAAGCT( db/m1 | db/m | 1779 | 0.021669 | FALSE | 1.382404 | FALSE | Pericyte               |
| ACAAGCT( db/m1 | db/m | 6926 | 0.007441 | FALSE | 0.946444 | FALSE | Photoreceptor          |
| ACAAGCT( db/m1 | db/m | 764  | 0.041154 | FALSE | 1.719192 | FALSE | Photoreceptor          |
| ACAAGCT( db/m1 | db/m | 469  | 0.022059 | FALSE | 3.539152 | FALSE | Muller cell            |
| ACAAGCT( db/m1 | db/m | 3444 | 0.006317 | FALSE | 1.597033 | FALSE | Neuron                 |
| ACAAGCT( db/m1 | db/m | 698  | 0.119124 | TRUE  | 12.08791 | TRUE  |                        |
| ACAAGCT( db/m1 | db/m | 1522 | 0.015581 | FALSE | 1.466961 | FALSE | Endothelia Capillary E |
| ACAAGCT( db/m1 | db/m | 3098 | 0.010384 | FALSE | 1.080953 | FALSE | Endothelia Venous EC   |
| ACAAGCT( db/m1 | db/m | 7803 | 0.016799 | FALSE | 0.794738 | FALSE | Photoreceptor          |
| ACAAGCTI db/m1 | db/m | 2936 | 0.088776 | FALSE | 15.9892  | TRUE  |                        |
| ACAAGCTI db/m1 | db/m | 3493 | 0.017114 | FALSE | 1.083457 | FALSE | Endothelia Capillary E |
| ACAAGCTI db/m1 | db/m | 1339 | 0.082569 | FALSE | 11.11896 | TRUE  |                        |
| ACAAGCTI db/m1 | db/m | 1128 | 0.071958 | FALSE | 1.511708 | FALSE | Photoreceptor          |
| ACACAGT# db/m1 | db/m | 2525 | 0.015287 | FALSE | 1.501217 | FALSE | Endothelia Venous EC   |
| ACACAGT( db/m1 | db/m | 4068 | 0.014711 | FALSE | 1.22014  | FALSE | Photoreceptor          |
| ACACAGT( db/m1 | db/m | 1041 | 0.051646 | FALSE | 0.999879 | FALSE | Photoreceptor          |
| ACACAGT( db/m1 | db/m | 937  | 0.057037 | FALSE | 1.901103 | FALSE | Photoreceptor          |
| ACACAGTI db/m1 | db/m | 5310 | 0.036891 | FALSE | 1.185669 | FALSE | Photoreceptor          |
| ACACCAAC db/m1 | db/m | 1013 | 0.038953 | FALSE | 2.11362  | FALSE | Photoreceptor          |
| ACACCAAC db/m1 | db/m | 5502 | 0.027758 | FALSE | 0.781228 | FALSE | Photoreceptor          |
| ACACCAAC db/m1 | db/m | 2358 | 0.054795 | FALSE | 1.753302 | FALSE | Photoreceptor          |
| ACACCAAC db/m1 | db/m | 494  | 0.042704 | FALSE | 1.830145 | FALSE | Photoreceptor          |
| ACACCAAC db/m1 | db/m | 3360 | 0.018088 | FALSE | 1.489513 | FALSE | Neuron                 |
| ACACCAAT db/m1 | db/m | 3582 | 0.042704 | FALSE | 1.242355 | FALSE | Photoreceptor          |
| ACACGCG# db/m1 | db/m | 441  | 0.068864 | FALSE | 25.4446  | TRUE  |                        |
| ACACGCG# db/m1 | db/m | 1382 | 0.016488 | FALSE | 1.857073 | FALSE | Endothelia Capillary E |
| ACACGCG( db/m1 | db/m | 5665 | 0.017758 | FALSE | 0.950959 | FALSE | Photoreceptor          |
| ACACGCG( db/m1 | db/m | 861  | 0.093319 | FALSE | 2.592526 | FALSE | Muller cell            |
| ACACGCG( db/m1 | db/m | 1517 | 0.018422 | FALSE | 1.407927 | FALSE | Endothelia Capillary E |
| ACACGCG( db/m1 | db/m | 3735 | 0.047807 | FALSE | 0.500478 | FALSE | Photoreceptor          |
| ACACGCGI db/m1 | db/m | 2510 | 0.027758 | FALSE | 1.703227 | FALSE | Neuron                 |
| ACACGCGI db/m1 | db/m | 2128 | 0.048732 | FALSE | 2.036601 | FALSE | Photoreceptor          |
| ACACGCGI db/m1 | db/m | 448  | 0.022059 | FALSE | 2.722944 | FALSE | Endothelia Capillary E |
| ACACTGA# db/m1 | db/m | 606  | 0.008644 | FALSE | 3.325115 | FALSE | Pericyte               |
| ACACTGA# db/m1 | db/m | 1052 | 0.055901 | FALSE | 1.65643  | FALSE | Photoreceptor          |
| ACACTGA# db/m1 | db/m | 3339 | 0.043505 | FALSE | 1.391929 | FALSE | Photoreceptor          |
| ACACTGAC db/m1 | db/m | 1980 | 0.061912 | FALSE | 2.26332  | FALSE | Photoreceptor          |
| ACACTGAC db/m1 | db/m | 791  | 0.046025 | FALSE | 4.551076 | FALSE | Muller cell            |
| ACACTGAC db/m1 | db/m | 1002 | 0.023682 | FALSE | 1.371673 | FALSE | Photoreceptor          |
| ACACTGAC db/m1 | db/m | 696  | 0.078788 | FALSE | 41.26667 | TRUE  |                        |
| ACACTGAC db/m1 | db/m | 1246 | 0.022455 | FALSE | 2.12961  | FALSE | Endothelia Capillary E |
| ACACTGAT db/m1 | db/m | 5345 | 0.052669 | FALSE | 1.147616 | FALSE | Photoreceptor          |
| ACACTGAT db/m1 | db/m | 1426 | 0.016181 | FALSE | 1.439573 | FALSE | Photoreceptor          |
| ACAGAAA# db/m1 | db/m | 1241 | 0.055901 | FALSE | 0.697546 | FALSE | Photoreceptor          |

|                 |      |      |          |       |          |       |                        |
|-----------------|------|------|----------|-------|----------|-------|------------------------|
| ACAGAAA/ db/m1  | db/m | 2080 | 0.093319 | FALSE | 2.926377 | FALSE | Muller cell            |
| ACAGAAA( db/m1  | db/m | 1360 | 0.042704 | FALSE | 4.429491 | FALSE | Muller cell            |
| ACAGAAA( db/m1  | db/m | 1014 | 0.051646 | FALSE | 1.620153 | FALSE | Photoreceptor          |
| ACAGAAA( db/m1  | db/m | 5541 | 0.15354  | TRUE  | 5.112865 | TRUE  |                        |
| ACAGAAA( db/m1  | db/m | 7134 | 0.012052 | FALSE | 0.981203 | FALSE | Photoreceptor          |
| ACAGAAA( db/m1  | db/m | 999  | 0.015581 | FALSE | 1.530367 | FALSE | Endothelia Capillary E |
| ACAGAAA` db/m1  | db/m | 549  | 0.011081 | FALSE | 3.119302 | FALSE | Photoreceptor          |
| ACAGCCG/ db/m1  | db/m | 503  | 0.037564 | FALSE | 3.138106 | FALSE | Endothelia Capillary E |
| ACAGCCG/ db/m1  | db/m | 672  | 0.067388 | FALSE | 15.625   | TRUE  |                        |
| ACAGCCG( db/m1  | db/m | 1766 | 0.071958 | FALSE | 1.562485 | FALSE | Photoreceptor          |
| ACAGCCG( db/m1  | db/m | 285  | 0.021669 | FALSE | 65.85804 | TRUE  |                        |
| ACAGCCG( db/m1  | db/m | 658  | 0.018761 | FALSE | 0.822061 | FALSE | Photoreceptor          |
| ACAGCCG( db/m1  | db/m | 1157 | 0.024105 | FALSE | 1.339988 | FALSE | Photoreceptor          |
| ACAGCCG( db/m1  | db/m | 1180 | 0.025868 | FALSE | 3.728552 | FALSE | Muller cell            |
| ACAGCCG  db/m1  | db/m | 5526 | 0.032546 | FALSE | 1.148289 | FALSE | Endothelia Capillary E |
| ACAGCCG  db/m1  | db/m | 4572 | 0.035586 | FALSE | 0.898913 | FALSE | Endothelia Venous EC   |
| ACAGGGA/ db/m1  | db/m | 432  | 0.022857 | FALSE | 3.180304 | FALSE | Pericyte               |
| ACAGGGA` db/m1  | db/m | 974  | 0.043505 | FALSE | 0.778122 | FALSE | Photoreceptor          |
| ACAGGGA` db/m1  | db/m | 4580 | 0.068864 | FALSE | 0.83189  | FALSE | Photoreceptor          |
| ACAGGGA` db/m1  | db/m | 2404 | 0.020536 | FALSE | 1.487864 | FALSE | Endothelia Capillary E |
| ACATCCCA db/m1  | db/m | 2518 | 0.013876 | FALSE | 1.118373 | FALSE | Endothelia Capillary E |
| ACATCCCA db/m1  | db/m | 4737 | 0.017434 | FALSE | 1.192997 | FALSE | Photoreceptor          |
| ACATCCCC db/m1  | db/m | 440  | 0.040404 | FALSE | 3.515376 | FALSE | Endothelia Capillary E |
| ACATCCCC db/m1  | db/m | 7480 | 0.031973 | FALSE | 0.971419 | FALSE | Photoreceptor          |
| ACATCCCT db/m1  | db/m | 816  | 0.04192  | FALSE | 48.80821 | TRUE  |                        |
| ACATCCCT db/m1  | db/m | 4310 | 0.025416 | FALSE | 0.702581 | FALSE | Photoreceptor          |
| ACATCGA/ db/m1  | db/m | 830  | 0.049679 | FALSE | 2.802397 | FALSE | Photoreceptor          |
| ACATCGA/ db/m1  | db/m | 372  | 0.006137 | FALSE | 3.50487  | FALSE | Endothelia Capillary E |
| ACATCGA( db/m1  | db/m | 1471 | 0.031411 | FALSE | 1.34319  | FALSE | Photoreceptor          |
| ACATCGA( db/m1  | db/m | 2676 | 0.011805 | FALSE | 0.960829 | FALSE | Endothelia Venous EC   |
| ACATCGAT db/m1  | db/m | 3343 | 0.025868 | FALSE | 1.119947 | FALSE | Photoreceptor          |
| ACATCGAT db/m1  | db/m | 2774 | 0.020536 | FALSE | 1.45296  | FALSE | Endothelia Venous EC   |
| ACATGCA/ db/m1  | db/m | 519  | 0.034334 | FALSE | 4.218061 | FALSE | Muller cell            |
| ACATGCA/ db/m1  | db/m | 5063 | 0.033726 | FALSE | 1.076439 | FALSE | Photoreceptor          |
| ACATGCA/ db/m1  | db/m | 6971 | 0.115723 | TRUE  | 5.655222 | TRUE  |                        |
| ACATGCA( db/m1  | db/m | 780  | 0.028754 | FALSE | 0.794839 | FALSE | Photoreceptor          |
| ACATGCA( db/m1  | db/m | 1311 | 0.047807 | FALSE | 0.964607 | FALSE | Photoreceptor          |
| ACATGCA( db/m1  | db/m | 4271 | 0.078788 | FALSE | 1.022318 | FALSE | Neuron                 |
| ACATGCA( db/m1  | db/m | 3919 | 0.059406 | FALSE | 0.99459  | FALSE | Photoreceptor          |
| ACATGCA( db/m1  | db/m | 4427 | 0.059406 | FALSE | 1.260978 | FALSE | Photoreceptor          |
| ACATGCAT db/m1  | db/m | 2523 | 0.060641 | FALSE | 1.510876 | FALSE | Photoreceptor          |
| ACATTTCA db/m1  | db/m | 4637 | 0.049679 | FALSE | 1.202359 | FALSE | Photoreceptor          |
| ACATTTCC db/m1  | db/m | 5280 | 0.17103  | TRUE  | 5.017301 | TRUE  |                        |
| ACATTTCC db/m1  | db/m | 843  | 0.047807 | FALSE | 1.192592 | FALSE | Photoreceptor          |
| ACATTTCC db/m1  | db/m | 4763 | 0.025416 | FALSE | 1.134025 | FALSE | Photoreceptor          |
| ACATTTCC db/m1  | db/m | 7940 | 0.010157 | FALSE | 0.799357 | FALSE | Photoreceptor          |
| ACATTTCCG db/m1 | db/m | 1778 | 0.012303 | FALSE | 1.494313 | FALSE | Endothelia Aterial EC  |

|                |      |      |          |       |          |       |                        |
|----------------|------|------|----------|-------|----------|-------|------------------------|
| ACATTTCT db/m1 | db/m | 2726 | 0.045165 | FALSE | 1.542872 | FALSE | Endothelia Capillary E |
| ACATTTCT db/m1 | db/m | 1026 | 0.049679 | FALSE | 1.958596 | FALSE | Photoreceptor          |
| ACATTTCT db/m1 | db/m | 6306 | 0.016181 | FALSE | 0.931293 | FALSE | Photoreceptor          |
| ACATTTCT db/m1 | db/m | 474  | 0.035586 | FALSE | 1.745919 | FALSE | Pericyte               |
| ACATTTCT db/m1 | db/m | 1421 | 0.030318 | FALSE | 1.498843 | FALSE | Pericyte               |
| ACCAAAC db/m1  | db/m | 4272 | 0.008032 | FALSE | 0.997315 | FALSE | Photoreceptor          |
| ACCAAAC db/m1  | db/m | 2638 | 0.028251 | FALSE | 1.531547 | FALSE | Endothelia Venous EC   |
| ACCAAAC db/m1  | db/m | 2506 | 0.035586 | FALSE | 1.220056 | FALSE | Endothelia Venous EC   |
| ACCAAAC db/m1  | db/m | 5620 | 0.022455 | FALSE | 0.818368 | FALSE | Photoreceptor          |
| ACCAAAC db/m1  | db/m | 5300 | 0.034334 | FALSE | 1.251513 | FALSE | Photoreceptor          |
| ACCAACA db/m1  | db/m | 750  | 0.04192  | FALSE | 1.275805 | FALSE | Photoreceptor          |
| ACCAACA db/m1  | db/m | 3115 | 0.029787 | FALSE | 0.649754 | FALSE | Photoreceptor          |
| ACCAACA db/m1  | db/m | 2262 | 0.028251 | FALSE | 0.8255   | FALSE | Photoreceptor          |
| ACCAACA db/m1  | db/m | 1119 | 0.052669 | FALSE | 29.53427 | TRUE  |                        |
| ACCAACA db/m1  | db/m | 589  | 0.070386 | FALSE | 52.41716 | TRUE  |                        |
| ACCAACA db/m1  | db/m | 3946 | 0.027758 | FALSE | 0.93583  | FALSE | Photoreceptor          |
| ACCAACA db/m1  | db/m | 1284 | 0.055901 | FALSE | 2.256965 | FALSE | Muller cell            |
| ACCAACAT db/m1 | db/m | 846  | 0.04192  | FALSE | 1.242472 | FALSE | Photoreceptor          |
| ACCAACAT db/m1 | db/m | 3479 | 0.051646 | FALSE | 2.269639 | FALSE | Neuron                 |
| ACCACAA db/m1  | db/m | 665  | 0.075259 | FALSE | 9.126595 | TRUE  |                        |
| ACCACAA db/m1  | db/m | 1049 | 0.070386 | FALSE | 1.565227 | FALSE | Photoreceptor          |
| ACCACAA db/m1  | db/m | 4170 | 0.033726 | FALSE | 1.135522 | FALSE | Photoreceptor          |
| ACCACAA db/m1  | db/m | 1519 | 0.073582 | FALSE | 1.123092 | FALSE | Photoreceptor          |
| ACCATTTA db/m1 | db/m | 364  | 0.03313  | FALSE | 4.627959 | FALSE | Muller cell            |
| ACCATTTA db/m1 | db/m | 1154 | 0.024105 | FALSE | 1.946228 | FALSE | Endothelia Capillary E |
| ACCATTTC db/m1 | db/m | 4745 | 0.026796 | FALSE | 1.024359 | FALSE | Photoreceptor          |
| ACCATTTG db/m1 | db/m | 4107 | 0.054795 | FALSE | 0.872138 | FALSE | Endothelia Venous EC   |
| ACCCAAAC db/m1 | db/m | 583  | 0.046025 | FALSE | 4.85769  | FALSE | Muller cell            |
| ACCCAAAC db/m1 | db/m | 1118 | 0.046025 | FALSE | 2.260386 | FALSE | Muller cell            |
| ACCCAAAC db/m1 | db/m | 6781 | 0.032546 | FALSE | 0.763042 | FALSE | Photoreceptor          |
| ACCCAAAC db/m1 | db/m | 1270 | 0.039671 | FALSE | 0.949894 | FALSE | Photoreceptor          |
| ACCCAAAC db/m1 | db/m | 972  | 0.051646 | FALSE | 1.686529 | FALSE | Photoreceptor          |
| ACCCAAAC db/m1 | db/m | 7459 | 0.007636 | FALSE | 1.001949 | FALSE | Photoreceptor          |
| ACCCAAAC db/m1 | db/m | 747  | 0.006683 | FALSE | 1.260863 | FALSE | Endothelia Capillary E |
| ACCCAAAT db/m1 | db/m | 443  | 0.084562 | FALSE | 4.677347 | FALSE | Muller cell            |
| ACCCTCAA db/m1 | db/m | 3314 | 0.067388 | FALSE | 1.170952 | FALSE | Photoreceptor          |
| ACCCTCAC db/m1 | db/m | 666  | 0.009933 | FALSE | 1.634632 | FALSE | Photoreceptor          |
| ACCCTCAC db/m1 | db/m | 4082 | 0.032546 | FALSE | 0.60022  | FALSE | Photoreceptor          |
| ACCCTCAC db/m1 | db/m | 2910 | 0.065957 | FALSE | 1.512018 | FALSE | Photoreceptor          |
| ACCCTCAC db/m1 | db/m | 4782 | 0.019106 | FALSE | 1.151723 | FALSE | Photoreceptor          |
| ACCCTCAG db/m1 | db/m | 5036 | 0.020536 | FALSE | 1.335795 | FALSE | Neuron                 |
| ACCCTCAG db/m1 | db/m | 8460 | 0.009063 | FALSE | 0.917835 | FALSE | Photoreceptor          |
| ACCCTCAG db/m1 | db/m | 1994 | 0.032546 | FALSE | 1.142105 | FALSE | Photoreceptor          |
| ACCCTCAG db/m1 | db/m | 964  | 0.095727 | FALSE | 2.483485 | FALSE | Muller cell            |
| ACCCTCAT db/m1 | db/m | 1178 | 0.08663  | FALSE | 3.614825 | FALSE | Muller cell            |
| ACCCTTGC db/m1 | db/m | 2966 | 0.054795 | FALSE | 1.191276 | FALSE | Photoreceptor          |
| ACCCTTGC db/m1 | db/m | 547  | 0.022059 | FALSE | 1.040171 | FALSE | Photoreceptor          |

|                |      |      |          |       |          |       |                        |
|----------------|------|------|----------|-------|----------|-------|------------------------|
| ACCCTTGC db/m1 | db/m | 6126 | 0.020171 | FALSE | 0.960876 | FALSE | Photoreceptor          |
| ACCGTTCA db/m1 | db/m | 2769 | 0.008852 | FALSE | 1.914594 | FALSE | Photoreceptor          |
| ACCGTTCA db/m1 | db/m | 457  | 0.027758 | FALSE | 1.754077 | FALSE | Microglia              |
| ACCGTTCA db/m1 | db/m | 4303 | 0.038251 | FALSE | 1.130037 | FALSE | Photoreceptor          |
| ACCGTTCA db/m1 | db/m | 1115 | 0.076994 | FALSE | 3.474706 | FALSE | Muller cell            |
| ACCGTTCC db/m1 | db/m | 5106 | 0.076994 | FALSE | 0.921377 | FALSE | Photoreceptor          |
| ACCGTTCC db/m1 | db/m | 2523 | 0.034334 | FALSE | 1.430033 | FALSE | Endothelia Capillary E |
| ACCGTTCC db/m1 | db/m | 1505 | 0.044326 | FALSE | 1.377183 | FALSE | Photoreceptor          |
| ACCGTTCT db/m1 | db/m | 2059 | 0.013605 | FALSE | 0.330346 | FALSE | Photoreceptor          |
| ACCTACCA db/m1 | db/m | 6324 | 0.034334 | FALSE | 0.893415 | FALSE | Photoreceptor          |
| ACCTACCA db/m1 | db/m | 6776 | 0.012052 | FALSE | 0.875298 | FALSE | Photoreceptor          |
| ACCTACCC db/m1 | db/m | 2333 | 0.01981  | FALSE | 1.368436 | FALSE | Endothelia Capillary E |
| ACCTACCC db/m1 | db/m | 1674 | 0.036232 | FALSE | 1.921421 | FALSE | Photoreceptor          |
| ACCTACCT db/m1 | db/m | 1539 | 0.025416 | FALSE | 2.148586 | FALSE | Endothelia Capillary E |
| ACCTACCT db/m1 | db/m | 5997 | 0.021669 | FALSE | 0.884738 | FALSE | Photoreceptor          |
| ACCTGAA db/m1  | db/m | 544  | 0.065957 | FALSE | 16.35688 | TRUE  |                        |
| ACCTGAA db/m1  | db/m | 9297 | 0.013876 | FALSE | 0.796936 | FALSE | Photoreceptor          |
| ACCTGAAC db/m1 | db/m | 7004 | 0.034954 | FALSE | 1.104088 | FALSE | Photoreceptor          |
| ACCTGAAC db/m1 | db/m | 3287 | 0.017114 | FALSE | 1.346059 | FALSE | Photoreceptor          |
| ACCTGAAC db/m1 | db/m | 696  | 0.055901 | FALSE | 1.096643 | FALSE | Photoreceptor          |
| ACCTGAAC db/m1 | db/m | 1220 | 0.038953 | FALSE | 1.841174 | FALSE | Photoreceptor          |
| ACCTGAAC db/m1 | db/m | 343  | 0.059406 | FALSE | 2.975297 | FALSE | Muller cell            |
| ACCTGAAC db/m1 | db/m | 1664 | 0.008234 | FALSE | 1.518024 | FALSE | Endothelia Capillary E |
| ACCTGAAT db/m1 | db/m | 1090 | 0.015581 | FALSE | 1.243239 | FALSE | Endothelia Capillary E |
| ACCTGTCA db/m1 | db/m | 649  | 0.005958 | FALSE | 1.649914 | FALSE | Endothelia Capillary E |
| ACCTGTCC db/m1 | db/m | 1205 | 0.084562 | FALSE | 1.210817 | FALSE | Photoreceptor          |
| ACCTGTCC db/m1 | db/m | 1352 | 0.038953 | FALSE | 2.095485 | FALSE | Endothelia Venous EC   |
| ACCTGTCT db/m1 | db/m | 1504 | 0.04192  | FALSE | 0.867602 | FALSE | Photoreceptor          |
| ACCTGTCT db/m1 | db/m | 4195 | 0.03313  | FALSE | 1.31233  | FALSE | Photoreceptor          |
| ACCTGTCT db/m1 | db/m | 3253 | 0.057037 | FALSE | 1.239798 | FALSE | Neuron                 |
| ACGATCA db/m1  | db/m | 3762 | 0.022857 | FALSE | 0.849812 | FALSE | Photoreceptor          |
| ACGATCA db/m1  | db/m | 968  | 0.033726 | FALSE | 1.020225 | FALSE | Photoreceptor          |
| ACGATCA db/m1  | db/m | 785  | 0.026328 | FALSE | 8.562691 | TRUE  |                        |
| ACGATGT db/m1  | db/m | 1047 | 0.028251 | FALSE | 1.504213 | FALSE | Photoreceptor          |
| ACGATGT db/m1  | db/m | 2035 | 0.027273 | FALSE | 1.362885 | FALSE | Endothelia Venous EC   |
| ACGATGT db/m1  | db/m | 2113 | 0.002901 | FALSE | 0.871146 | FALSE | Neuron                 |
| ACGATGT db/m1  | db/m | 447  | 0.046906 | FALSE | 57.70863 | TRUE  |                        |
| ACGATGT db/m1  | db/m | 829  | 0.022455 | FALSE | 1.220512 | FALSE | Photoreceptor          |
| ACGATGT db/m1  | db/m | 1425 | 0.068864 | FALSE | 15.12323 | TRUE  |                        |
| ACGATGT db/m1  | db/m | 583  | 0.064568 | FALSE | 5.179283 | TRUE  |                        |
| ACGATGT db/m1  | db/m | 1236 | 0.060641 | FALSE | 20.85393 | TRUE  |                        |
| ACGCACG db/m1  | db/m | 7007 | 0.148377 | TRUE  | 3.45965  | FALSE |                        |
| ACGCACG db/m1  | db/m | 2400 | 0.061912 | FALSE | 1.590084 | FALSE | Pericyte               |
| ACGCACG db/m1  | db/m | 658  | 0.046025 | FALSE | 1.696481 | FALSE | Photoreceptor          |
| ACGCACG db/m1  | db/m | 814  | 0.013876 | FALSE | 0.726878 | FALSE | Photoreceptor          |
| ACGCACG db/m1  | db/m | 2276 | 0.035586 | FALSE | 1.144273 | FALSE | Endothelia Venous EC   |
| ACGCACG db/m1  | db/m | 679  | 0.005435 | FALSE | 1.638309 | FALSE | Endothelia Capillary E |

|                |      |      |          |       |          |       |                        |
|----------------|------|------|----------|-------|----------|-------|------------------------|
| ACGGAAG db/m1  | db/m | 2062 | 0.037564 | FALSE | 1.636587 | FALSE | Pericyte               |
| ACGGAAG db/m1  | db/m | 1518 | 0.037564 | FALSE | 0.84768  | FALSE | Photoreceptor          |
| ACGGAAG db/m1  | db/m | 997  | 0.057037 | FALSE | 2.462828 | FALSE | Photoreceptor          |
| ACGGAAG db/m1  | db/m | 2548 | 0.018422 | FALSE | 1.242579 | FALSE | Neuron                 |
| ACGGAAG db/m1  | db/m | 871  | 0.209157 | TRUE  | 43.23084 | TRUE  |                        |
| ACGGAAG db/m1  | db/m | 8073 | 0.037564 | FALSE | 0.654253 | FALSE | Photoreceptor          |
| ACGGGTC db/m1  | db/m | 612  | 0.036232 | FALSE | 46.77734 | TRUE  |                        |
| ACGGGTC db/m1  | db/m | 5017 | 0.036891 | FALSE | 0.980588 | FALSE | Photoreceptor          |
| ACGGGTC db/m1  | db/m | 407  | 0.038953 | FALSE | 1.013558 | FALSE | Neuron                 |
| ACGGGTC db/m1  | db/m | 7434 | 0.014711 | FALSE | 0.81846  | FALSE | Photoreceptor          |
| ACGGGTC db/m1  | db/m | 1330 | 0.064568 | FALSE | 1.059331 | FALSE | Photoreceptor          |
| ACGGGTC db/m1  | db/m | 872  | 0.017114 | FALSE | 1.425074 | FALSE | Photoreceptor          |
| ACGGTCG db/m1  | db/m | 449  | 0.052669 | FALSE | 51.52103 | TRUE  |                        |
| ACGGTCG db/m1  | db/m | 3505 | 0.100845 | TRUE  | 4.057772 | FALSE |                        |
| ACGGTCG db/m1  | db/m | 762  | 0.059406 | FALSE | 1.015532 | FALSE | Photoreceptor          |
| ACGGTCG db/m1  | db/m | 1921 | 0.070386 | FALSE | 2.157396 | FALSE | Muller cell            |
| ACGGTCG db/m1  | db/m | 508  | 0.014711 | FALSE | 3.808655 | FALSE | Endothelia Capillary E |
| ACGGTCG db/m1  | db/m | 1337 | 0.054795 | FALSE | 0.912598 | FALSE | Photoreceptor          |
| ACGGTCG db/m1  | db/m | 390  | 0.044326 | FALSE | 2.849879 | FALSE | Photoreceptor          |
| ACGGTTA db/m1  | db/m | 1071 | 0.065957 | FALSE | 1.057008 | FALSE | Photoreceptor          |
| ACGGTTA db/m1  | db/m | 4842 | 0.048732 | FALSE | 1.194463 | FALSE | Photoreceptor          |
| ACGGTTA db/m1  | db/m | 2885 | 0.055901 | FALSE | 1.498315 | FALSE | Neuron                 |
| ACGGTTA db/m1  | db/m | 2164 | 0.054795 | FALSE | 1.643476 | FALSE | Photoreceptor          |
| ACGGTTA db/m1  | db/m | 2824 | 0.035586 | FALSE | 1.948015 | FALSE | Neuron                 |
| ACGGTTA db/m1  | db/m | 918  | 0.031973 | FALSE | 2.74863  | FALSE | Photoreceptor          |
| ACGGTTA db/m1  | db/m | 6911 | 0.024105 | FALSE | 0.746719 | FALSE | Photoreceptor          |
| ACGGTTA db/m1  | db/m | 1962 | 0.026328 | FALSE | 0.772361 | FALSE | Photoreceptor          |
| ACGGTTA db/m1  | db/m | 2074 | 0.091004 | FALSE | 1.738501 | FALSE | Endothelia Capillary E |
| ACGGTTA db/m1  | db/m | 829  | 0.038953 | FALSE | 0.955788 | FALSE | Photoreceptor          |
| ACGGTTA db/m1  | db/m | 2848 | 0.049679 | FALSE | 1.212333 | FALSE | Endothelia Venous EC   |
| ACGGTTA db/m1  | db/m | 1175 | 0.030859 | FALSE | 0.577543 | FALSE | Photoreceptor          |
| ACGTAAC db/m1  | db/m | 7798 | 0.023266 | FALSE | 0.871239 | FALSE | Photoreceptor          |
| ACGTAAC db/m1  | db/m | 4169 | 0.054795 | FALSE | 1.207948 | FALSE | Photoreceptor          |
| ACGTAAC db/m1  | db/m | 785  | 0.048732 | FALSE | 1.97769  | FALSE | Photoreceptor          |
| ACGTAAC db/m1  | db/m | 2728 | 0.042704 | FALSE | 1.569072 | FALSE | Endothelia Venous EC   |
| ACGTAAC db/m1  | db/m | 3935 | 0.026796 | FALSE | 0.868317 | FALSE | Photoreceptor          |
| ACGTACA db/m1  | db/m | 923  | 0.030318 | FALSE | 1.193112 | FALSE | Photoreceptor          |
| ACGTACA db/m1  | db/m | 2203 | 0.025868 | FALSE | 1.700546 | FALSE | Neuron                 |
| ACGTACA db/m1  | db/m | 3360 | 0.059406 | FALSE | 1.591555 | FALSE | Photoreceptor          |
| ACGTACA db/m1  | db/m | 2253 | 0.023682 | FALSE | 1.553551 | FALSE | Endothelia Capillary E |
| ACGTACA db/m1  | db/m | 507  | 0.026796 | FALSE | 0.468174 | FALSE | Photoreceptor          |
| ACGTAGT db/m1  | db/m | 1658 | 0.019106 | FALSE | 1.554358 | FALSE | Endothelia Capillary E |
| ACGTAGT db/m1  | db/m | 1847 | 0.037564 | FALSE | 1.678392 | FALSE | Endothelia Capillary E |
| ACGTAGT db/m1  | db/m | 2124 | 0.025416 | FALSE | 1.149079 | FALSE | Endothelia Aterial EC  |
| ACGTAGT db/m1  | db/m | 3232 | 0.043505 | FALSE | 1.439339 | FALSE | Endothelia Venous EC   |
| ACGTAGT db/m1  | db/m | 417  | 0.029266 | FALSE | 2.932686 | FALSE | Muller cell            |
| ACGTCCTA db/m1 | db/m | 1822 | 0.031973 | FALSE | 1.509613 | FALSE | Endothelia Capillary E |

|                 |      |      |          |       |          |       |                        |
|-----------------|------|------|----------|-------|----------|-------|------------------------|
| ACGTCCTA db/m1  | db/m | 2390 | 0.020171 | FALSE | 1.053059 | FALSE | Endothelia Venous EC   |
| ACGTCCTA db/m1  | db/m | 2834 | 0.026328 | FALSE | 0.85945  | FALSE | Photoreceptor          |
| ACGTCCTA db/m1  | db/m | 635  | 0.118221 | TRUE  | 2.5      | FALSE |                        |
| ACGTCCTC db/m1  | db/m | 3631 | 0.016181 | FALSE | 1.343258 | FALSE | Endothelia Venous EC   |
| ACGTCCTG db/m1  | db/m | 848  | 0.073582 | FALSE | 2.176651 | FALSE | Photoreceptor          |
| ACGTCCTT db/m1  | db/m | 4002 | 0.075259 | FALSE | 6.130818 | TRUE  |                        |
| ACGTTCCA db/m1  | db/m | 454  | 0.020908 | FALSE | 2.647688 | FALSE | Photoreceptor          |
| ACGTTCCA db/m1  | db/m | 6093 | 0.044326 | FALSE | 0.768474 | FALSE | Photoreceptor          |
| ACGTTCCC db/m1  | db/m | 555  | 0.046025 | FALSE | 1.627894 | FALSE | Photoreceptor          |
| ACGTTCCC db/m1  | db/m | 743  | 0.014151 | FALSE | 2.426928 | FALSE | Pericyte               |
| ACGTTCCC db/m1  | db/m | 2662 | 0.010384 | FALSE | 1.401225 | FALSE | Photoreceptor          |
| ACGTTCCG db/m1  | db/m | 1725 | 0.028754 | FALSE | 1.410952 | FALSE | Neuron                 |
| ACGTTCCG db/m1  | db/m | 1127 | 0.041154 | FALSE | 0.756318 | FALSE | Photoreceptor          |
| ACGTTCCG db/m1  | db/m | 798  | 0.070386 | FALSE | 1.916099 | FALSE | Photoreceptor          |
| ACGTTCCT db/m1  | db/m | 2675 | 0.019455 | FALSE | 1.710184 | FALSE | Endothelia Capillary E |
| ACGTTCCT db/m1  | db/m | 707  | 0.052669 | FALSE | 47.93388 | TRUE  |                        |
| ACGTTCCT db/m1  | db/m | 1837 | 0.022857 | FALSE | 1.30534  | FALSE | Photoreceptor          |
| ACTACGA db/m1   | db/m | 2293 | 0.020908 | FALSE | 1.116209 | FALSE | Endothelia Venous EC   |
| ACTACGA db/m1   | db/m | 2065 | 0.028754 | FALSE | 1.273914 | FALSE | Photoreceptor          |
| ACTACGA db/m1   | db/m | 1389 | 0.015581 | FALSE | 1.824952 | FALSE | Endothelia Aterial EC  |
| ACTACGAC db/m1  | db/m | 1946 | 0.037564 | FALSE | 1.637076 | FALSE | Endothelia Capillary E |
| ACTACGAC db/m1  | db/m | 1394 | 0.022455 | FALSE | 1.756009 | FALSE | Pericyte               |
| ACTACGAC db/m1  | db/m | 828  | 0.03313  | FALSE | 0.836174 | FALSE | Photoreceptor          |
| ACTACGAC db/m1  | db/m | 1554 | 0.051646 | FALSE | 8.172043 | TRUE  |                        |
| ACTACGAC db/m1  | db/m | 1224 | 0.018761 | FALSE | 1.496365 | FALSE | Endothelia Capillary E |
| ACTACGAC db/m1  | db/m | 2827 | 0.091004 | FALSE | 1.556916 | FALSE | Photoreceptor          |
| ACTACGAC db/m1  | db/m | 1545 | 0.020536 | FALSE | 1.435449 | FALSE | Endothelia Capillary E |
| ACTACGAC db/m1  | db/m | 854  | 0.078788 | FALSE | 0.817293 | FALSE | Photoreceptor          |
| ACTACGAT db/m1  | db/m | 6361 | 0.013876 | FALSE | 0.684864 | FALSE | Photoreceptor          |
| ACTACGAT db/m1  | db/m | 3371 | 0.030859 | FALSE | 1.110812 | FALSE | Endothelia Venous EC   |
| ACTACGAT db/m1  | db/m | 3731 | 0.073582 | FALSE | 1.247882 | FALSE | Endothelia Venous EC   |
| ACTATCTA db/m1  | db/m | 7419 | 0.023682 | FALSE | 0.993008 | FALSE | Photoreceptor          |
| ACTATCTC db/m1  | db/m | 1104 | 0.084562 | FALSE | 1.374903 | FALSE | Photoreceptor          |
| ACTATCTC db/m1  | db/m | 648  | 0.041154 | FALSE | 1.93628  | FALSE | Photoreceptor          |
| ACTATCTC db/m1  | db/m | 2216 | 0.042704 | FALSE | 1.32352  | FALSE | Photoreceptor          |
| ACTATCTG db/m1  | db/m | 665  | 0.048732 | FALSE | 2.775893 | FALSE | Endothelia Capillary E |
| ACTATCTG db/m1  | db/m | 761  | 0.445833 | TRUE  | 6.20438  | TRUE  |                        |
| ACTATCTT db/m1  | db/m | 1304 | 0.030318 | FALSE | 1.181403 | FALSE | Photoreceptor          |
| ACTATCTT db/m1  | db/m | 3018 | 0.095727 | FALSE | 1.439143 | FALSE | Photoreceptor          |
| ACTATGGC db/m1  | db/m | 2298 | 0.130374 | TRUE  | 5.872341 | TRUE  |                        |
| ACTATGGT db/m1  | db/m | 1079 | 0.075259 | FALSE | 1.672135 | FALSE | Photoreceptor          |
| ACTATTCA db/m1  | db/m | 6845 | 0.008644 | FALSE | 1.041199 | FALSE | Photoreceptor          |
| ACTATTCA db/m1  | db/m | 531  | 0.058205 | FALSE | 2.216389 | FALSE | Photoreceptor          |
| ACTATTCA db/m1  | db/m | 3062 | 0.049679 | FALSE | 1.181132 | FALSE | Photoreceptor          |
| ACTATTCC db/m1  | db/m | 1514 | 0.015287 | FALSE | 2.340663 | FALSE | Pericyte               |
| ACTATTCCG db/m1 | db/m | 9003 | 0.027273 | FALSE | 0.844092 | FALSE | Photoreceptor          |
| ACTATTCCG db/m1 | db/m | 1029 | 0.057037 | FALSE | 48.18752 | TRUE  |                        |

|                |      |      |          |       |          |       |                        |
|----------------|------|------|----------|-------|----------|-------|------------------------|
| ACTATTCG db/m1 | db/m | 1214 | 0.031973 | FALSE | 1.906578 | FALSE | Pericyte               |
| ACTATTCG db/m1 | db/m | 1288 | 0.022059 | FALSE | 1.478284 | FALSE | Photoreceptor          |
| ACTATTCT db/m1 | db/m | 994  | 0.020908 | FALSE | 0.610103 | FALSE | Photoreceptor          |
| ACTATTCT db/m1 | db/m | 2319 | 0.024105 | FALSE | 1.587727 | FALSE | Endothelia Aterial EC  |
| ACTATTCT db/m1 | db/m | 1127 | 0.118221 | TRUE  | 4.036909 | FALSE |                        |
| ACTCCCAA db/m1 | db/m | 1569 | 0.059406 | FALSE | 1.006152 | FALSE | Photoreceptor          |
| ACTCCCAC db/m1 | db/m | 685  | 0.022455 | FALSE | 0.659289 | FALSE | Photoreceptor          |
| ACTCTCGA db/m1 | db/m | 3872 | 0.065957 | FALSE | 0.869539 | FALSE | Photoreceptor          |
| ACTCTCGG db/m1 | db/m | 560  | 0.070386 | FALSE | 58.97841 | TRUE  |                        |
| ACTCTCGG db/m1 | db/m | 2166 | 0.041154 | FALSE | 1.566153 | FALSE | Neuron                 |
| ACTCTCGG db/m1 | db/m | 5397 | 0.053718 | FALSE | 1.145663 | FALSE | Photoreceptor          |
| ACTCTCGT db/m1 | db/m | 2362 | 0.052669 | FALSE | 2.080956 | FALSE | Muller cell            |
| ACTGATG db/m1  | db/m | 1025 | 0.039671 | FALSE | 0.935627 | FALSE | Photoreceptor          |
| ACTGATG db/m1  | db/m | 2810 | 0.011319 | FALSE | 1.339394 | FALSE | Endothelia Capillary E |
| ACTGATG db/m1  | db/m | 1793 | 0.018761 | FALSE | 1.931426 | FALSE | Endothelia Venous EC   |
| ACTGATG db/m1  | db/m | 1944 | 0.007636 | FALSE | 1.988845 | FALSE | Neuron                 |
| ACTGATG db/m1  | db/m | 2863 | 0.022455 | FALSE | 1.158046 | FALSE | Endothelia Capillary E |
| ACTGCAAC db/m1 | db/m | 6921 | 0.010384 | FALSE | 0.955061 | FALSE | Photoreceptor          |
| ACTGCAAC db/m1 | db/m | 823  | 0.038251 | FALSE | 2.506163 | FALSE | Muller cell            |
| ACTGCAAC db/m1 | db/m | 2467 | 0.076994 | FALSE | 1.019292 | FALSE | Photoreceptor          |
| ACTGCAAC db/m1 | db/m | 3371 | 0.036891 | FALSE | 0.969648 | FALSE | Endothelia Capillary E |
| ACTGCAAC db/m1 | db/m | 3478 | 0.031973 | FALSE | 1.242582 | FALSE | Endothelia Venous EC   |
| ACTGCAAT db/m1 | db/m | 1434 | 0.017434 | FALSE | 2.102217 | FALSE | Pericyte               |
| ACTGTCCA db/m1 | db/m | 715  | 0.036232 | FALSE | 59.41943 | TRUE  |                        |
| ACTGTCCC db/m1 | db/m | 898  | 0.061912 | FALSE | 0.906571 | FALSE | Photoreceptor          |
| ACTGTCCC db/m1 | db/m | 2740 | 0.003497 | FALSE | 0.877907 | FALSE | Neuron                 |
| ACTGTCCC db/m1 | db/m | 9550 | 0.015581 | FALSE | 0.642535 | FALSE | Photoreceptor          |
| ACTGTCCC db/m1 | db/m | 3679 | 0.006683 | FALSE | 1.499369 | FALSE | Neuron                 |
| ACTGTCCG db/m1 | db/m | 570  | 0.023682 | FALSE | 2.918982 | FALSE | Muller cell            |
| ACTGTCCG db/m1 | db/m | 877  | 0.032546 | FALSE | 2.344957 | FALSE | Photoreceptor          |
| ACTGTCCG db/m1 | db/m | 6501 | 0.013605 | FALSE | 1.005376 | FALSE | Photoreceptor          |
| ACTGTCCG db/m1 | db/m | 7460 | 0.035586 | FALSE | 0.855433 | FALSE | Photoreceptor          |
| ACTGTCCG db/m1 | db/m | 529  | 0.034954 | FALSE | 3.239641 | FALSE | Muller cell            |
| ACTGTCCG db/m1 | db/m | 2840 | 0.014711 | FALSE | 1.389131 | FALSE | Endothelia Capillary E |
| ACTGTCCT db/m1 | db/m | 3605 | 0.029787 | FALSE | 1.750812 | FALSE | Neuron                 |
| ACTGTCCT db/m1 | db/m | 6117 | 0.020171 | FALSE | 1.070375 | FALSE | Photoreceptor          |
| ACTGTGAC db/m1 | db/m | 1708 | 0.016488 | FALSE | 1.034499 | FALSE | Endothelia Aterial EC  |
| ACTGTGAC db/m1 | db/m | 5226 | 0.034334 | FALSE | 1.175614 | FALSE | Endothelia Capillary E |
| ACTGTGAC db/m1 | db/m | 1027 | 0.071958 | FALSE | 1.532309 | FALSE | Photoreceptor          |
| ACTGTGAC db/m1 | db/m | 830  | 0.029787 | FALSE | 2.147255 | FALSE | Photoreceptor          |
| ACTGTGAC db/m1 | db/m | 5823 | 0.030318 | FALSE | 0.582358 | FALSE | Photoreceptor          |
| ACTGTGAT db/m1 | db/m | 2658 | 0.070386 | FALSE | 1.436541 | FALSE | Endothelia Venous EC   |
| ACTGTGAT db/m1 | db/m | 871  | 0.071958 | FALSE | 3.501446 | FALSE | Muller cell            |
| ACTGTGAT db/m1 | db/m | 6033 | 0.041154 | FALSE | 0.853902 | FALSE | Photoreceptor          |
| ACTTAGGC db/m1 | db/m | 1408 | 0.064568 | FALSE | 2.195045 | FALSE | Photoreceptor          |
| ACTTAGGC db/m1 | db/m | 3519 | 0.037564 | FALSE | 1.21893  | FALSE | Endothelia Venous EC   |
| ACTTAGGC db/m1 | db/m | 3565 | 0.023266 | FALSE | 1.066543 | FALSE | Photoreceptor          |

|                |      |      |          |       |          |       |                        |
|----------------|------|------|----------|-------|----------|-------|------------------------|
| ACTTAGGT db/m1 | db/m | 4750 | 0.04192  | FALSE | 1.039391 | FALSE | Photoreceptor          |
| ACTTATCC db/m1 | db/m | 369  | 0.093319 | FALSE | 12.87879 | TRUE  |                        |
| ACTTATCT db/m1 | db/m | 3868 | 0.091004 | FALSE | 1.352542 | FALSE | Photoreceptor          |
| ACTTATCT db/m1 | db/m | 2597 | 0.023266 | FALSE | 1.387494 | FALSE | Endothelia Venous EC   |
| ACTTCCGA db/m1 | db/m | 2293 | 0.026796 | FALSE | 1.462914 | FALSE | Pericyte               |
| ACTTCCGA db/m1 | db/m | 739  | 0.075259 | FALSE | 1.43096  | FALSE | Photoreceptor          |
| ACTTCCG db/m1  | db/m | 4238 | 0.024105 | FALSE | 0.710023 | FALSE | Photoreceptor          |
| ACTTCCG db/m1  | db/m | 1631 | 0.024534 | FALSE | 1.141392 | FALSE | Endothelia Capillary E |
| ACTTCCGT db/m1 | db/m | 7468 | 0.011319 | FALSE | 0.878154 | FALSE | Photoreceptor          |
| ACTTCCGT db/m1 | db/m | 566  | 0.065957 | FALSE | 1.56962  | FALSE | Photoreceptor          |
| ACTTCCGT db/m1 | db/m | 4130 | 0.016488 | FALSE | 1.147461 | FALSE | Endothelia Capillary E |
| ACTTCCGT db/m1 | db/m | 3398 | 0.019455 | FALSE | 1.337332 | FALSE | Endothelia Venous EC   |
| ACTTCGCA db/m1 | db/m | 468  | 0.067388 | FALSE | 3.472869 | FALSE | Muller cell            |
| ACTTCGCA db/m1 | db/m | 5889 | 0.038953 | FALSE | 0.882758 | FALSE | Photoreceptor          |
| ACTTCGCA db/m1 | db/m | 4558 | 0.05065  | FALSE | 1.180947 | FALSE | Photoreceptor          |
| ACTTCGCC db/m1 | db/m | 3653 | 0.022857 | FALSE | 1.268357 | FALSE | Endothelia Capillary E |
| ACTTCGCC db/m1 | db/m | 875  | 0.061912 | FALSE | 45.53806 | TRUE  |                        |
| ACTTCGCC db/m1 | db/m | 4203 | 0.016181 | FALSE | 0.959754 | FALSE | Endothelia Venous EC   |
| ACTTCGCC db/m1 | db/m | 949  | 0.052669 | FALSE | 1.862446 | FALSE | Photoreceptor          |
| ACTTCGCT db/m1 | db/m | 866  | 0.058205 | FALSE | 1.182396 | FALSE | Photoreceptor          |
| ACTTCGCT db/m1 | db/m | 1933 | 0.029787 | FALSE | 1.082585 | FALSE | Neuron                 |
| ACTTTCAA db/m1 | db/m | 3197 | 0.033726 | FALSE | 1.366442 | FALSE | Endothelia Venous EC   |
| ACTTTCAA db/m1 | db/m | 3053 | 0.029266 | FALSE | 1.411077 | FALSE | Photoreceptor          |
| ACTTTCAC db/m1 | db/m | 1468 | 0.314286 | TRUE  | 6.569054 | TRUE  |                        |
| ACTTTCAG db/m1 | db/m | 927  | 0.020171 | FALSE | 1.738773 | FALSE | Photoreceptor          |
| ACTTTCAG db/m1 | db/m | 729  | 0.029787 | FALSE | 1.290776 | FALSE | Photoreceptor          |
| ACTTTCAT db/m1 | db/m | 1600 | 0.070386 | FALSE | 7.147165 | TRUE  |                        |
| ACTTTCAT db/m1 | db/m | 2985 | 0.034954 | FALSE | 0.987424 | FALSE | Photoreceptor          |
| ACTTTCAT db/m1 | db/m | 435  | 0.031973 | FALSE | 55.71113 | TRUE  |                        |
| ACTTTGTA db/m1 | db/m | 3054 | 0.075259 | FALSE | 0.671454 | FALSE | Neuron                 |
| ACTTTGTA db/m1 | db/m | 1110 | 0.047807 | FALSE | 1.202949 | FALSE | Photoreceptor          |
| ACTTTGTA db/m1 | db/m | 1086 | 0.060641 | FALSE | 0.574403 | FALSE | Photoreceptor          |
| ACTTTGTA db/m1 | db/m | 467  | 0.031973 | FALSE | 1.222422 | FALSE | Photoreceptor          |
| ACTTTGTC db/m1 | db/m | 921  | 0.020908 | FALSE | 1.762905 | FALSE | Photoreceptor          |
| ACTTTGTC db/m1 | db/m | 6645 | 0.018422 | FALSE | 1.12917  | FALSE | Photoreceptor          |
| ACTTTGTG db/m1 | db/m | 2585 | 0.012052 | FALSE | 1.311755 | FALSE | Neuron                 |
| ACTTTGTG db/m1 | db/m | 1313 | 0.016488 | FALSE | 1.557284 | FALSE | Endothelia Capillary E |
| ACTTTGTG db/m1 | db/m | 2995 | 0.039671 | FALSE | 1.042539 | FALSE | Photoreceptor          |
| ACTTTGTG db/m1 | db/m | 2522 | 0.035586 | FALSE | 1.433732 | FALSE | Endothelia Venous EC   |
| ACTTTGTT db/m1 | db/m | 2551 | 0.021669 | FALSE | 1.042168 | FALSE | Photoreceptor          |
| AGAAATG db/m1  | db/m | 2673 | 0.043505 | FALSE | 0.907596 | FALSE | Photoreceptor          |
| AGAAATG db/m1  | db/m | 3947 | 0.021286 | FALSE | 1.146486 | FALSE | Endothelia Venous EC   |
| AGAAATG db/m1  | db/m | 1830 | 0.025868 | FALSE | 1.335542 | FALSE | Endothelia Capillary E |
| AGAAATG db/m1  | db/m | 3955 | 0.020536 | FALSE | 0.813577 | FALSE | Photoreceptor          |
| AGAAATG db/m1  | db/m | 2526 | 0.082569 | FALSE | 2.629397 | FALSE | Muller cell            |
| AGAAATG db/m1  | db/m | 4843 | 0.026328 | FALSE | 1.121118 | FALSE | Photoreceptor          |
| AGAAATG db/m1  | db/m | 4982 | 0.042704 | FALSE | 0.841374 | FALSE | Photoreceptor          |



|                |      |      |          |       |          |       |                        |
|----------------|------|------|----------|-------|----------|-------|------------------------|
| AGAACAA/ db/m1 | db/m | 846  | 0.063221 | FALSE | 1.977816 | FALSE | Neuron                 |
| AGAACAA/ db/m1 | db/m | 720  | 0.059406 | FALSE | 0.82569  | FALSE | Photoreceptor          |
| AGAACAA( db/m1 | db/m | 3372 | 0.027273 | FALSE | 1.368311 | FALSE | Endothelia Capillary E |
| AGAACAA( db/m1 | db/m | 1587 | 0.53202  | TRUE  | 4.801147 | FALSE |                        |
| AGAACAA( db/m1 | db/m | 3349 | 0.055901 | FALSE | 1.744292 | FALSE | Photoreceptor          |
| AGAACAA( db/m1 | db/m | 5553 | 0.027273 | FALSE | 0.961775 | FALSE | Photoreceptor          |
| AGAACAA( db/m1 | db/m | 2952 | 0.046025 | FALSE | 1.418736 | FALSE | Endothelia Aterial EC  |
| AGAACAA( db/m1 | db/m | 2505 | 0.082569 | FALSE | 1.365714 | FALSE | Photoreceptor          |
| AGAACAA^ db/m1 | db/m | 1439 | 0.063221 | FALSE | 1.529867 | FALSE | Photoreceptor          |
| AGAACAA^ db/m1 | db/m | 602  | 0.035586 | FALSE | 3.164608 | FALSE | Photoreceptor          |
| AGAACAA^ db/m1 | db/m | 1462 | 0.058205 | FALSE | 0.93679  | FALSE | Photoreceptor          |
| AGAACAA^ db/m1 | db/m | 498  | 0.058205 | FALSE | 42.79197 | TRUE  |                        |
| AGAACAA^ db/m1 | db/m | 522  | 0.020908 | FALSE | 2.005499 | FALSE | Endothelia Capillary E |
| AGAACAA^ db/m1 | db/m | 700  | 0.016488 | FALSE | 1.557332 | FALSE | Muller cell            |
| AGAACCT/ db/m1 | db/m | 1002 | 0.054795 | FALSE | 2.090352 | FALSE | Photoreceptor          |
| AGAACCT/ db/m1 | db/m | 2260 | 0.005782 | FALSE | 0.966096 | FALSE | Neuron                 |
| AGAACCT( db/m1 | db/m | 936  | 0.068864 | FALSE | 1.805205 | FALSE | Photoreceptor          |
| AGAACCT( db/m1 | db/m | 2505 | 0.038953 | FALSE | 1.267005 | FALSE | Endothelia Capillary E |
| AGAACCT( db/m1 | db/m | 6887 | 0.023266 | FALSE | 1.059472 | FALSE | Photoreceptor          |
| AGAACCT( db/m1 | db/m | 762  | 0.048732 | FALSE | 4.004168 | FALSE | Muller cell            |
| AGAACCT( db/m1 | db/m | 1844 | 0.064568 | FALSE | 1.557961 | FALSE | Endothelia Capillary E |
| AGAACCTI db/m1 | db/m | 3588 | 0.040404 | FALSE | 1.288402 | FALSE | Photoreceptor          |
| AGAAGCG/ db/m1 | db/m | 3234 | 0.025416 | FALSE | 1.222544 | FALSE | Endothelia Venous EC   |
| AGAAGCG/ db/m1 | db/m | 1224 | 0.016488 | FALSE | 0.943444 | FALSE | Photoreceptor          |
| AGAAGCG/ db/m1 | db/m | 8324 | 0.016799 | FALSE | 0.800504 | FALSE | Photoreceptor          |
| AGAAGCG/ db/m1 | db/m | 5230 | 0.049679 | FALSE | 1.022707 | FALSE | Photoreceptor          |
| AGAAGCG/ db/m1 | db/m | 1936 | 0.106408 | TRUE  | 3.907075 | FALSE |                        |
| AGAAGTA/ db/m1 | db/m | 1558 | 0.012814 | FALSE | 1.64039  | FALSE | Endothelia Capillary E |
| AGAAGTA/ db/m1 | db/m | 1869 | 0.012052 | FALSE | 1.271911 | FALSE | Endothelia Capillary E |
| AGAAGTA( db/m1 | db/m | 1706 | 0.018761 | FALSE | 1.340965 | FALSE | Endothelia Capillary E |
| AGAAGTA( db/m1 | db/m | 5254 | 0.010157 | FALSE | 1.005297 | FALSE | Photoreceptor          |
| AGAAGTA( db/m1 | db/m | 608  | 0.018761 | FALSE | 0.59906  | FALSE | Photoreceptor          |
| AGAAGTA^ db/m1 | db/m | 519  | 0.011805 | FALSE | 2.083014 | FALSE | Endothelia Capillary E |
| AGAAGTA^ db/m1 | db/m | 1006 | 0.064568 | FALSE | 1.169628 | FALSE | Photoreceptor          |
| AGACAAA/ db/m1 | db/m | 2476 | 0.029266 | FALSE | 1.708654 | FALSE | Neuron                 |
| AGACAAA/ db/m1 | db/m | 728  | 0.030318 | FALSE | 0.791408 | FALSE | Photoreceptor          |
| AGACAAA/ db/m1 | db/m | 4793 | 0.013605 | FALSE | 1.124342 | FALSE | Endothelia Venous EC   |
| AGACAAA( db/m1 | db/m | 5158 | 0.018761 | FALSE | 1.111638 | FALSE | Photoreceptor          |
| AGACAAA( db/m1 | db/m | 623  | 0.082569 | FALSE | 38.69814 | TRUE  |                        |
| AGACAAA^ db/m1 | db/m | 3765 | 0.037564 | FALSE | 1.10455  | FALSE | Endothelia Venous EC   |
| AGACAAA^ db/m1 | db/m | 5496 | 0.030318 | FALSE | 0.847339 | FALSE | Photoreceptor          |
| AGACAAA^ db/m1 | db/m | 1342 | 0.031411 | FALSE | 1.366014 | FALSE | Photoreceptor          |
| AGACACT/ db/m1 | db/m | 1377 | 0.024534 | FALSE | 0.753357 | FALSE | Photoreceptor          |
| AGACACT( db/m1 | db/m | 3348 | 0.025868 | FALSE | 1.212921 | FALSE | Endothelia Capillary E |
| AGACACT( db/m1 | db/m | 1874 | 0.020908 | FALSE | 1.293892 | FALSE | Endothelia Capillary E |
| AGACACT( db/m1 | db/m | 1170 | 0.017434 | FALSE | 1.100715 | FALSE | Photoreceptor          |
| AGACACT( db/m1 | db/m | 4271 | 0.016181 | FALSE | 1.130757 | FALSE | Photoreceptor          |

|                |      |      |          |       |          |       |                        |
|----------------|------|------|----------|-------|----------|-------|------------------------|
| AGACACTC db/m1 | db/m | 2793 | 0.012557 | FALSE | 0.849705 | FALSE | Photoreceptor          |
| AGACACTT db/m1 | db/m | 1344 | 0.075259 | FALSE | 1.298712 | FALSE | Photoreceptor          |
| AGACAGG db/m1  | db/m | 2461 | 0.025416 | FALSE | 0.806111 | FALSE | Photoreceptor          |
| AGACAGG db/m1  | db/m | 1618 | 0.064568 | FALSE | 1.49556  | FALSE | Photoreceptor          |
| AGACAGG db/m1  | db/m | 1376 | 0.040404 | FALSE | 0.70405  | FALSE | Photoreceptor          |
| AGACAGG db/m1  | db/m | 703  | 0.028251 | FALSE | 0.865031 | FALSE | Photoreceptor          |
| AGACAGG db/m1  | db/m | 393  | 0.052669 | FALSE | 1.675182 | FALSE | Photoreceptor          |
| AGACAGG db/m1  | db/m | 506  | 0.031411 | FALSE | 3.390533 | FALSE | Muller cell            |
| AGACAGG db/m1  | db/m | 811  | 0.009063 | FALSE | 2.118772 | FALSE | Endothelia Capillary E |
| AGACCAT db/m1  | db/m | 834  | 0.020171 | FALSE | 2.737721 | FALSE | Muller cell            |
| AGACCATC db/m1 | db/m | 2662 | 0.065957 | FALSE | 1.017058 | FALSE | Microglia              |
| AGACCATC db/m1 | db/m | 4084 | 0.024534 | FALSE | 1.181459 | FALSE | Endothelia Capillary E |
| AGACCATT db/m1 | db/m | 549  | 0.038251 | FALSE | 57.72059 | TRUE  |                        |
| AGACCCG db/m1  | db/m | 3830 | 0.023266 | FALSE | 0.635326 | FALSE | Photoreceptor          |
| AGACCCG db/m1  | db/m | 2045 | 0.054795 | FALSE | 1.454518 | FALSE | Photoreceptor          |
| AGACCCG db/m1  | db/m | 691  | 0.040404 | FALSE | 0.882023 | FALSE | Photoreceptor          |
| AGACCCG db/m1  | db/m | 4725 | 0.052669 | FALSE | 0.779984 | FALSE | Photoreceptor          |
| AGACCCG db/m1  | db/m | 565  | 0.014997 | FALSE | 0.807665 | FALSE | Photoreceptor          |
| AGACCCG db/m1  | db/m | 1255 | 0.100845 | TRUE  | 8.909091 | TRUE  |                        |
| AGACCCG db/m1  | db/m | 5396 | 0.023266 | FALSE | 0.926206 | FALSE | Photoreceptor          |
| AGACCCG db/m1  | db/m | 1377 | 0.045165 | FALSE | 0.631126 | FALSE | Photoreceptor          |
| AGACCCG db/m1  | db/m | 5557 | 0.218615 | TRUE  | 3.799707 | FALSE |                        |
| AGACTCA db/m1  | db/m | 1219 | 0.046906 | FALSE | 4.346706 | FALSE | Muller cell            |
| AGACTCAC db/m1 | db/m | 1775 | 0.032546 | FALSE | 1.435095 | FALSE | Neuron                 |
| AGACTCAC db/m1 | db/m | 818  | 0.095727 | FALSE | 1.572492 | FALSE | Photoreceptor          |
| AGACTCAT db/m1 | db/m | 7011 | 0.034334 | FALSE | 0.581565 | FALSE | Photoreceptor          |
| AGACTCAT db/m1 | db/m | 1088 | 0.021669 | FALSE | 0.93651  | FALSE | Photoreceptor          |
| AGAGAAT db/m1  | db/m | 1900 | 0.003649 | FALSE | 1.487276 | FALSE | Neuron                 |
| AGAGAAT db/m1  | db/m | 5356 | 0.024105 | FALSE | 0.618107 | FALSE | Photoreceptor          |
| AGAGAAT db/m1  | db/m | 3231 | 0.035586 | FALSE | 1.194416 | FALSE | Photoreceptor          |
| AGAGAAT db/m1  | db/m | 717  | 0.091004 | FALSE | 3.048474 | FALSE | Muller cell            |
| AGAGAAT db/m1  | db/m | 1153 | 0.033726 | FALSE | 0.961666 | FALSE | Photoreceptor          |
| AGAGAAT db/m1  | db/m | 736  | 0.045165 | FALSE | 10.50725 | TRUE  |                        |
| AGAGAGC db/m1  | db/m | 576  | 0.038953 | FALSE | 4.768383 | FALSE | Muller cell            |
| AGAGAGC db/m1  | db/m | 2449 | 0.252153 | TRUE  | 6.318398 | TRUE  |                        |
| AGAGAGC db/m1  | db/m | 4761 | 0.036891 | FALSE | 1.253191 | FALSE | Photoreceptor          |
| AGAGAGC db/m1  | db/m | 1414 | 0.05065  | FALSE | 2.112896 | FALSE | Photoreceptor          |
| AGAGAGC db/m1  | db/m | 719  | 0.049679 | FALSE | 1.56194  | FALSE | Photoreceptor          |
| AGAGAGC db/m1  | db/m | 492  | 0.021669 | FALSE | 2.534176 | FALSE | Endothelia Capillary E |
| AGAGCAG db/m1  | db/m | 6974 | 0.016799 | FALSE | 0.917922 | FALSE | Photoreceptor          |
| AGAGCAG db/m1  | db/m | 3683 | 0.027273 | FALSE | 0.955629 | FALSE | Endothelia Venous EC   |
| AGAGCAG db/m1  | db/m | 5007 | 0.022059 | FALSE | 0.553896 | FALSE | Photoreceptor          |
| AGAGCAG db/m1  | db/m | 946  | 0.053718 | FALSE | 0.779866 | FALSE | Photoreceptor          |
| AGAGCAG db/m1  | db/m | 2956 | 0.016488 | FALSE | 1.205846 | FALSE | Photoreceptor          |
| AGAGCAG db/m1  | db/m | 1572 | 0.080645 | FALSE | 1.117278 | FALSE | Photoreceptor          |
| AGAGCCC db/m1  | db/m | 1931 | 0.027273 | FALSE | 1.084996 | FALSE | Photoreceptor          |
| AGAGCCC db/m1  | db/m | 2505 | 0.012052 | FALSE | 1.182787 | FALSE | Endothelia Venous EC   |

|               |      |      |          |       |          |       |                        |
|---------------|------|------|----------|-------|----------|-------|------------------------|
| AGAGCCC(db/m1 | db/m | 7977 | 0.034954 | FALSE | 0.776648 | FALSE | Photoreceptor          |
| AGAGCCC(db/m1 | db/m | 653  | 0.027758 | FALSE | 4.762393 | FALSE | Muller cell            |
| AGAGCCC(db/m1 | db/m | 970  | 0.037564 | FALSE | 2.158912 | FALSE | Photoreceptor          |
| AGAGCCCdb/m1  | db/m | 439  | 0.059406 | FALSE | 4.097656 | FALSE | Muller cell            |
| AGATAGA(db/m1 | db/m | 8299 | 0.016799 | FALSE | 0.791338 | FALSE | Photoreceptor          |
| AGATAGA(db/m1 | db/m | 1543 | 0.04192  | FALSE | 0.81157  | FALSE | Photoreceptor          |
| AGATAGA(db/m1 | db/m | 667  | 0.058205 | FALSE | 2.219016 | FALSE | Muller cell            |
| AGATAGA(db/m1 | db/m | 3072 | 0.053718 | FALSE | 0.785326 | FALSE | Photoreceptor          |
| AGATAGA(db/m1 | db/m | 5541 | 0.027758 | FALSE | 0.708184 | FALSE | Photoreceptor          |
| AGATAGA db/m1 | db/m | 269  | 0.059406 | FALSE | 2.798749 | FALSE | Muller cell            |
| AGATCCA db/m1 | db/m | 1719 | 0.064568 | FALSE | 1.748307 | FALSE | Photoreceptor          |
| AGATCCA db/m1 | db/m | 1145 | 0.034954 | FALSE | 0.839685 | FALSE | Photoreceptor          |
| AGATCCA db/m1 | db/m | 2447 | 0.018761 | FALSE | 0.685172 | FALSE | Photoreceptor          |
| AGATCCA db/m1 | db/m | 1102 | 0.112477 | TRUE  | 7.461977 | TRUE  |                        |
| AGATCCA(db/m1 | db/m | 1212 | 0.014429 | FALSE | 1.352999 | FALSE | Endothelia Capillary E |
| AGATCCA(db/m1 | db/m | 4281 | 0.024971 | FALSE | 1.170179 | FALSE | Photoreceptor          |
| AGATCCA(db/m1 | db/m | 366  | 0.065957 | FALSE | 25.64103 | TRUE  |                        |
| AGATCCA(db/m1 | db/m | 667  | 0.025416 | FALSE | 1.529931 | FALSE | Photoreceptor          |
| AGATCCA(db/m1 | db/m | 2883 | 0.011319 | FALSE | 1.278383 | FALSE | Photoreceptor          |
| AGATCGT db/m1 | db/m | 780  | 0.041154 | FALSE | 2.822672 | FALSE | Neuron                 |
| AGATCGT db/m1 | db/m | 5651 | 0.148377 | TRUE  | 2.029213 | FALSE |                        |
| AGATCGT(db/m1 | db/m | 524  | 0.073582 | FALSE | 45.11785 | TRUE  |                        |
| AGATCGT(db/m1 | db/m | 1454 | 0.037564 | FALSE | 1.463044 | FALSE | Photoreceptor          |
| AGATCGT(db/m1 | db/m | 849  | 0.037564 | FALSE | 1.003145 | FALSE | Photoreceptor          |
| AGATCGTdb/m1  | db/m | 5898 | 0.055901 | FALSE | 1.116699 | FALSE | Photoreceptor          |
| AGATCGTdb/m1  | db/m | 200  | 0.109795 | TRUE  | 0.267648 | FALSE |                        |
| AGATCGTdb/m1  | db/m | 1049 | 0.031973 | FALSE | 0.55739  | FALSE | Photoreceptor          |
| AGATCGTdb/m1  | db/m | 970  | 0.035586 | FALSE | 1.273924 | FALSE | Neuron                 |
| AGATCGTdb/m1  | db/m | 3169 | 0.022059 | FALSE | 1.338454 | FALSE | Endothelia Capillary E |
| AGATCGTdb/m1  | db/m | 5063 | 0.014711 | FALSE | 0.684513 | FALSE | Photoreceptor          |
| AGATGAA db/m1 | db/m | 1065 | 0.046906 | FALSE | 1.293894 | FALSE | Photoreceptor          |
| AGATGAA(db/m1 | db/m | 1304 | 0.020908 | FALSE | 1.745119 | FALSE | Endothelia Capillary E |
| AGATGAA(db/m1 | db/m | 838  | 0.011319 | FALSE | 0.786697 | FALSE | Pericyte               |
| AGATGAA(db/m1 | db/m | 4050 | 0.030318 | FALSE | 0.98316  | FALSE | Photoreceptor          |
| AGATGAA db/m1 | db/m | 557  | 0.068864 | FALSE | 4.934999 | FALSE | Muller cell            |
| AGATGCT db/m1 | db/m | 1849 | 0.064568 | FALSE | 1.851164 | FALSE | Photoreceptor          |
| AGATGCT db/m1 | db/m | 4248 | 0.021286 | FALSE | 0.524405 | FALSE | Photoreceptor          |
| AGATGCT(db/m1 | db/m | 629  | 0.057037 | FALSE | 44.04834 | TRUE  |                        |
| AGATGCT(db/m1 | db/m | 6783 | 0.008234 | FALSE | 0.930999 | FALSE | Photoreceptor          |
| AGATGCT(db/m1 | db/m | 423  | 0.059406 | FALSE | 6.506849 | TRUE  |                        |
| AGATGCTdb/m1  | db/m | 869  | 0.027758 | FALSE | 0.543307 | FALSE | Photoreceptor          |
| AGATGCTdb/m1  | db/m | 725  | 0.043505 | FALSE | 2.313316 | FALSE | Endothelia Capillary E |
| AGATGCTdb/m1  | db/m | 1198 | 0.024105 | FALSE | 1.421108 | FALSE | Endothelia Capillary E |
| AGCATCA db/m1 | db/m | 977  | 0.038251 | FALSE | 1.530448 | FALSE | Photoreceptor          |
| AGCATCA(db/m1 | db/m | 1066 | 0.038251 | FALSE | 1.779117 | FALSE | Photoreceptor          |
| AGCATCA(db/m1 | db/m | 2124 | 0.024971 | FALSE | 1.276833 | FALSE | Endothelia Capillary E |
| AGCATCA(db/m1 | db/m | 1900 | 0.028754 | FALSE | 0.503588 | FALSE | Microglia              |

|                |      |      |          |       |          |       |                        |
|----------------|------|------|----------|-------|----------|-------|------------------------|
| AGCATCAC db/m1 | db/m | 489  | 0.031411 | FALSE | 57.76791 | TRUE  |                        |
| AGCATCAC db/m1 | db/m | 1076 | 0.022857 | FALSE | 1.857587 | FALSE | Endothelia Aterial EC  |
| AGCATCAT db/m1 | db/m | 7929 | 0.013876 | FALSE | 0.722077 | FALSE | Photoreceptor          |
| AGCATCAT db/m1 | db/m | 576  | 0.020536 | FALSE | 0.834137 | FALSE | Photoreceptor          |
| AGCATCAT db/m1 | db/m | 1369 | 0.059406 | FALSE | 1.324087 | FALSE | Photoreceptor          |
| AGCATCAT db/m1 | db/m | 1388 | 0.061912 | FALSE | 1.182044 | FALSE | Photoreceptor          |
| AGCCAAT/ db/m1 | db/m | 416  | 0.054795 | FALSE | 2.851435 | FALSE | Photoreceptor          |
| AGCCAAT/ db/m1 | db/m | 4337 | 0.025868 | FALSE | 1.073911 | FALSE | Photoreceptor          |
| AGCCAATC db/m1 | db/m | 2019 | 0.015879 | FALSE | 1.32194  | FALSE | Endothelia Aterial EC  |
| AGCCAATC db/m1 | db/m | 1099 | 0.017758 | FALSE | 0.99801  | FALSE | Photoreceptor          |
| AGCCAATT db/m1 | db/m | 4795 | 0.021286 | FALSE | 1.175591 | FALSE | Photoreceptor          |
| AGCCAATT db/m1 | db/m | 1260 | 0.030318 | FALSE | 2.82419  | FALSE | Muller cell            |
| AGCCAATT db/m1 | db/m | 3953 | 0.041154 | FALSE | 1.155576 | FALSE | Photoreceptor          |
| AGCCACG/ db/m1 | db/m | 608  | 0.061912 | FALSE | 5.740528 | TRUE  |                        |
| AGCCACG( db/m1 | db/m | 510  | 0.007441 | FALSE | 1.497579 | FALSE | Endothelia Capillary E |
| AGCCACG( db/m1 | db/m | 719  | 0.078788 | FALSE | 4.752199 | FALSE | Muller cell            |
| AGCCACG( db/m1 | db/m | 2782 | 0.036891 | FALSE | 1.402349 | FALSE | Endothelia Venous EC   |
| AGCCACG( db/m1 | db/m | 1675 | 0.064568 | FALSE | 1.414488 | FALSE | Endothelia Capillary E |
| AGCCACG\ db/m1 | db/m | 3827 | 0.032546 | FALSE | 1.449985 | FALSE | Photoreceptor          |
| AGCCACG\ db/m1 | db/m | 3744 | 0.046025 | FALSE | 0.987761 | FALSE | Photoreceptor          |
| AGCCACG\ db/m1 | db/m | 418  | 0.076994 | FALSE | 3.086878 | FALSE | Neuron                 |
| AGCCACG\ db/m1 | db/m | 3443 | 0.016488 | FALSE | 1.194393 | FALSE | Endothelia Aterial EC  |
| AGCCACG\ db/m1 | db/m | 727  | 0.064568 | FALSE | 4.815121 | FALSE | Muller cell            |
| AGCCAGC( db/m1 | db/m | 8052 | 0.008438 | FALSE | 0.824949 | FALSE | Photoreceptor          |
| AGCCAGC( db/m1 | db/m | 963  | 0.039671 | FALSE | 3.885881 | FALSE | Neuron                 |
| AGCCAGC( db/m1 | db/m | 445  | 0.026796 | FALSE | 0.62478  | FALSE | Photoreceptor          |
| AGCCAGC( db/m1 | db/m | 4268 | 0.017758 | FALSE | 1.157832 | FALSE | Photoreceptor          |
| AGCCAGC\ db/m1 | db/m | 864  | 0.041154 | FALSE | 3.838892 | FALSE | Muller cell            |
| AGCGATT/ db/m1 | db/m | 6300 | 0.022455 | FALSE | 1.005666 | FALSE | Photoreceptor          |
| AGCGATT/ db/m1 | db/m | 1526 | 0.009712 | FALSE | 0.906551 | FALSE | Endothelia Capillary E |
| AGCGATT( db/m1 | db/m | 1799 | 0.041154 | FALSE | 1.055745 | FALSE | Photoreceptor          |
| AGCGATT( db/m1 | db/m | 4062 | 0.076994 | FALSE | 1.259585 | FALSE | Endothelia Capillary E |
| AGCGATT( db/m1 | db/m | 4478 | 0.060641 | FALSE | 1.252623 | FALSE | Photoreceptor          |
| AGCGATT\ db/m1 | db/m | 760  | 0.01981  | FALSE | 0.849782 | FALSE | Photoreceptor          |
| AGCGCCA/ db/m1 | db/m | 7672 | 0.020536 | FALSE | 0.5827   | FALSE | Photoreceptor          |
| AGCGCCA( db/m1 | db/m | 3307 | 0.029266 | FALSE | 0.605659 | FALSE | Photoreceptor          |
| AGCGCCA( db/m1 | db/m | 406  | 0.012052 | FALSE | 0.945668 | FALSE | Photoreceptor          |
| AGCGCCA\ db/m1 | db/m | 4349 | 0.143776 | TRUE  | 0.860367 | FALSE |                        |
| AGCGCCA\ db/m1 | db/m | 4053 | 0.028251 | FALSE | 0.82306  | FALSE | Photoreceptor          |
| AGCGCCA\ db/m1 | db/m | 378  | 0.058205 | FALSE | 3.986015 | FALSE | Pericyte               |
| AGCGCCA\ db/m1 | db/m | 604  | 0.035586 | FALSE | 2.116214 | FALSE | Photoreceptor          |
| AGCGCCA\ db/m1 | db/m | 940  | 0.126437 | TRUE  | 17.26535 | TRUE  |                        |
| AGCGCTG/ db/m1 | db/m | 2431 | 0.028251 | FALSE | 1.033714 | FALSE | Photoreceptor          |
| AGCGCTG/ db/m1 | db/m | 1069 | 0.068864 | FALSE | 2.907152 | FALSE | Photoreceptor          |
| AGCGCTG( db/m1 | db/m | 1415 | 0.037564 | FALSE | 1.215967 | FALSE | Photoreceptor          |
| AGCGCTG( db/m1 | db/m | 4447 | 0.014997 | FALSE | 1.110237 | FALSE | Photoreceptor          |
| AGCGCTG( db/m1 | db/m | 505  | 0.017114 | FALSE | 3.092155 | FALSE | Muller cell            |

|               |      |      |          |       |          |       |                        |
|---------------|------|------|----------|-------|----------|-------|------------------------|
| AGCGCTG(db/m1 | db/m | 1000 | 0.055901 | FALSE | 1.4273   | FALSE | Photoreceptor          |
| AGCGCTG(db/m1 | db/m | 1076 | 0.047807 | FALSE | 0.905891 | FALSE | Photoreceptor          |
| AGCGCTG(db/m1 | db/m | 952  | 0.030859 | FALSE | 1.754073 | FALSE | Photoreceptor          |
| AGCGTAT(db/m1 | db/m | 1163 | 0.027758 | FALSE | 2.135103 | FALSE | Photoreceptor          |
| AGCGTAT(db/m1 | db/m | 1217 | 0.026328 | FALSE | 1.392027 | FALSE | Photoreceptor          |
| AGCGTAT(db/m1 | db/m | 1898 | 0.024105 | FALSE | 0.710081 | FALSE | Photoreceptor          |
| AGCGTAT(db/m1 | db/m | 5235 | 0.022059 | FALSE | 1.316945 | FALSE | Photoreceptor          |
| AGCGTAT(db/m1 | db/m | 695  | 0.020536 | FALSE | 0.733491 | FALSE | Photoreceptor          |
| AGCGTAT(db/m1 | db/m | 943  | 0.022455 | FALSE | 3.466576 | FALSE | Muller cell            |
| AGCGTAT(db/m1 | db/m | 1864 | 0.043505 | FALSE | 2.004936 | FALSE | Endothelia Capillary E |
| AGCGTAT(db/m1 | db/m | 393  | 0.033726 | FALSE | 3.149083 | FALSE | Photoreceptor          |
| AGCGTAT(db/m1 | db/m | 1408 | 0.022857 | FALSE | 1.970163 | FALSE | Photoreceptor          |
| AGCGTATdb/m1  | db/m | 1534 | 0.049679 | FALSE | 1.924749 | FALSE | Photoreceptor          |
| AGCGTCG(db/m1 | db/m | 1962 | 0.046906 | FALSE | 0.796107 | FALSE | Photoreceptor          |
| AGCGTCGdb/m1  | db/m | 592  | 0.024534 | FALSE | 2.807664 | FALSE | Endothelia Capillary E |
| AGCTACA(db/m1 | db/m | 5601 | 0.016181 | FALSE | 0.558899 | FALSE | Photoreceptor          |
| AGCTACA(db/m1 | db/m | 607  | 0.064568 | FALSE | 40.54242 | TRUE  |                        |
| AGCTACA(db/m1 | db/m | 1114 | 0.025416 | FALSE | 1.006448 | FALSE | Photoreceptor          |
| AGCTACA(db/m1 | db/m | 1203 | 0.022857 | FALSE | 1.784151 | FALSE | Endothelia Aterial EC  |
| AGCTACA(db/m1 | db/m | 3109 | 0.022857 | FALSE | 1.050035 | FALSE | Photoreceptor          |
| AGCTACA(db/m1 | db/m | 909  | 0.030859 | FALSE | 1.462731 | FALSE | Endothelia Capillary E |
| AGCTACA(db/m1 | db/m | 754  | 0.017434 | FALSE | 0.865434 | FALSE | Photoreceptor          |
| AGCTACA(db/m1 | db/m | 2421 | 0.021286 | FALSE | 1.827362 | FALSE | Photoreceptor          |
| AGCTACATdb/m1 | db/m | 880  | 0.026796 | FALSE | 0.870375 | FALSE | Photoreceptor          |
| AGCTACATdb/m1 | db/m | 1167 | 0.049679 | FALSE | 2.155548 | FALSE | Photoreceptor          |
| AGCTACATdb/m1 | db/m | 378  | 0.04192  | FALSE | 4.361269 | FALSE | Muller cell            |
| AGCTCAA(db/m1 | db/m | 849  | 0.054795 | FALSE | 7.294552 | TRUE  |                        |
| AGCTCAA(db/m1 | db/m | 561  | 0.011805 | FALSE | 6.142506 | TRUE  |                        |
| AGCTCAACdb/m1 | db/m | 2709 | 0.046906 | FALSE | 2.075955 | FALSE | Photoreceptor          |
| AGCTCAACdb/m1 | db/m | 1934 | 0.009933 | FALSE | 1.475289 | FALSE | Endothelia Capillary E |
| AGCTCAACdb/m1 | db/m | 6989 | 0.008852 | FALSE | 0.940481 | FALSE | Photoreceptor          |
| AGCTCAACdb/m1 | db/m | 4056 | 0.139562 | TRUE  | 1.870408 | FALSE |                        |
| AGCTCAACdb/m1 | db/m | 8255 | 0.076994 | FALSE | 0.914141 | FALSE | Photoreceptor          |
| AGCTCAATdb/m1 | db/m | 1880 | 0.093319 | FALSE | 1.356373 | FALSE | Photoreceptor          |
| AGCTCAATdb/m1 | db/m | 826  | 0.058205 | FALSE | 2.182202 | FALSE | Endothelia Capillary E |
| AGCTCAATdb/m1 | db/m | 445  | 0.012052 | FALSE | 1.096152 | FALSE | Photoreceptor          |
| AGCTTCCAdb/m1 | db/m | 1424 | 0.065957 | FALSE | 1.443587 | FALSE | Photoreceptor          |
| AGCTTCCAdb/m1 | db/m | 4028 | 0.030859 | FALSE | 1.206597 | FALSE | Endothelia Venous EC   |
| AGCTTCCCdb/m1 | db/m | 677  | 0.034334 | FALSE | 0.5975   | FALSE | Photoreceptor          |
| AGCTTCCCdb/m1 | db/m | 1718 | 0.073582 | FALSE | 1.660785 | FALSE | Photoreceptor          |
| AGCTTCCTdb/m1 | db/m | 2246 | 0.014151 | FALSE | 1.472433 | FALSE | Endothelia Capillary E |
| AGGAAAT(db/m1 | db/m | 1312 | 0.041154 | FALSE | 0.824661 | FALSE | Photoreceptor          |
| AGGAAAT(db/m1 | db/m | 2319 | 0.17103  | TRUE  | 16.77488 | TRUE  |                        |
| AGGAAAT(db/m1 | db/m | 1418 | 0.052669 | FALSE | 3.031192 | FALSE | Muller cell            |
| AGGAAAT(db/m1 | db/m | 1340 | 0.055901 | FALSE | 1.811884 | FALSE | Photoreceptor          |
| AGGAAAT(db/m1 | db/m | 933  | 0.033726 | FALSE | 2.125956 | FALSE | Endothelia Capillary E |
| AGGAAATdb/m1  | db/m | 5013 | 0.046906 | FALSE | 0.710731 | FALSE | Photoreceptor          |

|                            |      |      |          |       |          |       |                        |
|----------------------------|------|------|----------|-------|----------|-------|------------------------|
| AGGAAAT <sup>-</sup> db/m1 | db/m | 2636 | 0.028754 | FALSE | 0.636677 | FALSE | Photoreceptor          |
| AGGAATA <sup>(</sup> db/m1 | db/m | 386  | 0.01981  | FALSE | 1.929628 | FALSE | Photoreceptor          |
| AGGAATA <sup>(</sup> db/m1 | db/m | 2598 | 0.012052 | FALSE | 1.483757 | FALSE | Photoreceptor          |
| AGGAATA <sup>-</sup> db/m1 | db/m | 4381 | 0.032546 | FALSE | 1.026541 | FALSE | Endothelia Venous EC   |
| AGGAATA <sup>-</sup> db/m1 | db/m | 8189 | 0.017758 | FALSE | 0.873016 | FALSE | Photoreceptor          |
| AGGAATA <sup>-</sup> db/m1 | db/m | 762  | 0.192271 | TRUE  | 3.225806 | FALSE |                        |
| AGGAATA <sup>-</sup> db/m1 | db/m | 1151 | 0.047807 | FALSE | 1.638693 | FALSE | Photoreceptor          |
| AGGACGA <sup>(</sup> db/m1 | db/m | 1272 | 0.032546 | FALSE | 7.521523 | TRUE  |                        |
| AGGACGA <sup>(</sup> db/m1 | db/m | 1083 | 0.020536 | FALSE | 0.590127 | FALSE | Photoreceptor          |
| AGGACGA <sup>(</sup> db/m1 | db/m | 2639 | 0.073582 | FALSE | 8.400074 | TRUE  |                        |
| AGGACGA <sup>(</sup> db/m1 | db/m | 2824 | 0.057037 | FALSE | 1.750077 | FALSE | Photoreceptor          |
| AGGACGA <sup>(</sup> db/m1 | db/m | 570  | 0.076994 | FALSE | 2.9026   | FALSE | Photoreceptor          |
| AGGACGA <sup>-</sup> db/m1 | db/m | 5189 | 0.022455 | FALSE | 1.145379 | FALSE | Photoreceptor          |
| AGGACTT <sup>/</sup> db/m1 | db/m | 628  | 0.059406 | FALSE | 1.484591 | FALSE | Photoreceptor          |
| AGGACTT <sup>(</sup> db/m1 | db/m | 2210 | 0.042704 | FALSE | 0.927783 | FALSE | Photoreceptor          |
| AGGAGGT <sup>(</sup> db/m1 | db/m | 3169 | 0.010846 | FALSE | 1.158529 | FALSE | Endothelia Venous EC   |
| AGGAGGT <sup>(</sup> db/m1 | db/m | 2451 | 0.013338 | FALSE | 1.348521 | FALSE | Endothelia Venous EC   |
| AGGAGGT <sup>(</sup> db/m1 | db/m | 3932 | 0.148377 | TRUE  | 9.88205  | TRUE  |                        |
| AGGAGGT <sup>(</sup> db/m1 | db/m | 2614 | 0.017758 | FALSE | 1.39338  | FALSE | Endothelia Capillary E |
| AGGAGGT <sup>-</sup> db/m1 | db/m | 8726 | 0.027273 | FALSE | 0.707824 | FALSE | Photoreceptor          |
| AGGAGGT <sup>-</sup> db/m1 | db/m | 2279 | 0.014429 | FALSE | 1.153276 | FALSE | Endothelia Venous EC   |
| AGGATAA <sup>/</sup> db/m1 | db/m | 3399 | 0.018088 | FALSE | 1.063709 | FALSE | Endothelia Capillary E |
| AGGATAA <sup>(</sup> db/m1 | db/m | 2286 | 0.013876 | FALSE | 0.437595 | FALSE | Photoreceptor          |
| AGGATAA <sup>(</sup> db/m1 | db/m | 989  | 0.006317 | FALSE | 2.317884 | FALSE | Pericyte               |
| AGGATAA <sup>(</sup> db/m1 | db/m | 1830 | 0.070386 | FALSE | 2.471445 | FALSE | Muller cell            |
| AGGATAA <sup>(</sup> db/m1 | db/m | 2098 | 0.058205 | FALSE | 1.612696 | FALSE | Photoreceptor          |
| AGGATAA <sup>(</sup> db/m1 | db/m | 2037 | 0.017114 | FALSE | 1.232937 | FALSE | Endothelia Capillary E |
| AGGATAA <sup>-</sup> db/m1 | db/m | 974  | 0.036891 | FALSE | 1.99149  | FALSE | Muller cell            |
| AGGATAA <sup>-</sup> db/m1 | db/m | 545  | 0.03313  | FALSE | 2.057961 | FALSE | Photoreceptor          |
| AGGATCT <sup>/</sup> db/m1 | db/m | 1004 | 0.028754 | FALSE | 1.653666 | FALSE | Photoreceptor          |
| AGGATCT <sup>/</sup> db/m1 | db/m | 2678 | 0.070386 | FALSE | 2.310505 | FALSE | Neuron                 |
| AGGATCT <sup>/</sup> db/m1 | db/m | 979  | 0.054795 | FALSE | 14.37055 | TRUE  |                        |
| AGGATCT <sup>(</sup> db/m1 | db/m | 432  | 0.026328 | FALSE | 2.754565 | FALSE | Endothelia Capillary E |
| AGGATCT <sup>(</sup> db/m1 | db/m | 6387 | 0.011319 | FALSE | 1.073049 | FALSE | Photoreceptor          |
| AGGATCT <sup>(</sup> db/m1 | db/m | 2410 | 0.031973 | FALSE | 1.296287 | FALSE | Photoreceptor          |
| AGGATCT <sup>(</sup> db/m1 | db/m | 903  | 0.067388 | FALSE | 2.399076 | FALSE | Muller cell            |
| AGGATCT <sup>(</sup> db/m1 | db/m | 5053 | 0.048732 | FALSE | 1.068946 | FALSE | Photoreceptor          |
| AGGATCT <sup>(</sup> db/m1 | db/m | 398  | 0.114609 | TRUE  | 3.195489 | FALSE |                        |
| AGGATCT <sup>(</sup> db/m1 | db/m | 442  | 0.030318 | FALSE | 4.094108 | FALSE | Muller cell            |
| AGGCATT <sup>/</sup> db/m1 | db/m | 3032 | 0.08663  | FALSE | 1.087282 | FALSE | Photoreceptor          |
| AGGCATT <sup>(</sup> db/m1 | db/m | 598  | 0.057037 | FALSE | 1.166921 | FALSE | Photoreceptor          |
| AGGCATT <sup>(</sup> db/m1 | db/m | 3084 | 0.016181 | FALSE | 1.342934 | FALSE | Photoreceptor          |
| AGGCATT <sup>(</sup> db/m1 | db/m | 490  | 0.015287 | FALSE | 3.092381 | FALSE | Photoreceptor          |
| AGGCATT <sup>(</sup> db/m1 | db/m | 1369 | 0.054795 | FALSE | 0.859659 | FALSE | Photoreceptor          |
| AGGCATT <sup>(</sup> db/m1 | db/m | 453  | 0.034954 | FALSE | 4.058904 | FALSE | Muller cell            |
| AGGCATT <sup>(</sup> db/m1 | db/m | 2101 | 0.035586 | FALSE | 1.230911 | FALSE | Photoreceptor          |
| AGGCCAC <sup>/</sup> db/m1 | db/m | 1004 | 0.011805 | FALSE | 1.146163 | FALSE | Photoreceptor          |

|                |      |      |          |       |          |       |                        |
|----------------|------|------|----------|-------|----------|-------|------------------------|
| AGGCCAC/ db/m1 | db/m | 617  | 0.13452  | TRUE  | 17.76504 | TRUE  |                        |
| AGGCCAC( db/m1 | db/m | 2260 | 0.021286 | FALSE | 1.362134 | FALSE | Neuron                 |
| AGGCCAC\ db/m1 | db/m | 1313 | 0.106408 | TRUE  | 15.43234 | TRUE  |                        |
| AGGCCAC\ db/m1 | db/m | 1030 | 0.025416 | FALSE | 2.165144 | FALSE | Photoreceptor          |
| AGGCCAC\ db/m1 | db/m | 2060 | 0.007833 | FALSE | 1.722433 | FALSE | Neuron                 |
| AGGCTGC/ db/m1 | db/m | 411  | 0.042704 | FALSE | 0.684433 | FALSE | Photoreceptor          |
| AGGCTGC( db/m1 | db/m | 6571 | 0.025868 | FALSE | 0.555461 | FALSE | Photoreceptor          |
| AGGCTGC( db/m1 | db/m | 1182 | 0.016799 | FALSE | 2.197657 | FALSE | Pericyte               |
| AGGCTGC( db/m1 | db/m | 2326 | 0.095727 | FALSE | 1.524277 | FALSE | Pericyte               |
| AGGCTGC( db/m1 | db/m | 5048 | 0.076994 | FALSE | 0.983773 | FALSE | Neuron                 |
| AGGCTGC\ db/m1 | db/m | 2631 | 0.068864 | FALSE | 11.10193 | TRUE  |                        |
| AGGCTGC\ db/m1 | db/m | 461  | 0.15354  | TRUE  | 14.98559 | TRUE  |                        |
| AGGGAGT. db/m1 | db/m | 618  | 0.15354  | TRUE  | 11.50538 | TRUE  |                        |
| AGGGAGT. db/m1 | db/m | 4438 | 0.034954 | FALSE | 0.92627  | FALSE | Photoreceptor          |
| AGGGAGT db/m1  | db/m | 1558 | 0.018422 | FALSE | 1.387468 | FALSE | Endothelia Capillary E |
| AGGGCCT/ db/m1 | db/m | 1017 | 0.030318 | FALSE | 1.549062 | FALSE | Photoreceptor          |
| AGGGCCT( db/m1 | db/m | 8116 | 0.022857 | FALSE | 0.827566 | FALSE | Photoreceptor          |
| AGGGCCT( db/m1 | db/m | 396  | 0.046025 | FALSE | 59.51036 | TRUE  |                        |
| AGGGCCT( db/m1 | db/m | 6422 | 0.130374 | TRUE  | 6.806127 | TRUE  |                        |
| AGGGCCT( db/m1 | db/m | 4804 | 0.08663  | FALSE | 1.312886 | FALSE | Photoreceptor          |
| AGGGCCT\ db/m1 | db/m | 412  | 0.046025 | FALSE | 3.644149 | FALSE | Muller cell            |
| AGGGCCT\ db/m1 | db/m | 7672 | 0.03313  | FALSE | 0.870703 | FALSE | Photoreceptor          |
| AGGGCTC/ db/m1 | db/m | 5415 | 0.029266 | FALSE | 1.205874 | FALSE | Photoreceptor          |
| AGGGCTC/ db/m1 | db/m | 1281 | 0.057037 | FALSE | 1.147802 | FALSE | Photoreceptor          |
| AGGGCTC( db/m1 | db/m | 1119 | 0.018422 | FALSE | 0.703562 | FALSE | Photoreceptor          |
| AGGGCTC( db/m1 | db/m | 3282 | 0.016799 | FALSE | 1.080086 | FALSE | Photoreceptor          |
| AGGGCTC( db/m1 | db/m | 7397 | 0.021669 | FALSE | 0.961847 | FALSE | Photoreceptor          |
| AGGGCTC( db/m1 | db/m | 762  | 0.107669 | TRUE  | 3.102837 | FALSE |                        |
| AGGGCTC\ db/m1 | db/m | 6360 | 0.024971 | FALSE | 0.622414 | FALSE | Photoreceptor          |
| AGGGCTC\ db/m1 | db/m | 978  | 0.071958 | FALSE | 1.654927 | FALSE | Photoreceptor          |
| AGGGTCC/ db/m1 | db/m | 605  | 0.084562 | FALSE | 3.397223 | FALSE | Muller cell            |
| AGGGTCC( db/m1 | db/m | 1473 | 0.061912 | FALSE | 2.500999 | FALSE | Photoreceptor          |
| AGGGTCC( db/m1 | db/m | 685  | 0.008234 | FALSE | 1.42609  | FALSE | Photoreceptor          |
| AGGGTCC\ db/m1 | db/m | 4043 | 0.093319 | FALSE | 1.128431 | FALSE | Endothelia Capillary E |
| AGGGTCC\ db/m1 | db/m | 1301 | 0.014997 | FALSE | 1.659246 | FALSE | Endothelia Capillary E |
| AGGGTGA\ db/m1 | db/m | 483  | 0.018761 | FALSE | 1.29161  | FALSE | Photoreceptor          |
| AGGGTGA\ db/m1 | db/m | 5698 | 0.011805 | FALSE | 0.950803 | FALSE | Photoreceptor          |
| AGGGTGA\ db/m1 | db/m | 858  | 0.057037 | FALSE | 1.254365 | FALSE | Photoreceptor          |
| AGGGTGA\ db/m1 | db/m | 310  | 0.068864 | FALSE | 4.869831 | FALSE | Photoreceptor          |
| AGGGTTT/ db/m1 | db/m | 7418 | 0.03313  | FALSE | 0.783201 | FALSE | Photoreceptor          |
| AGGGTTT/ db/m1 | db/m | 1189 | 0.022059 | FALSE | 1.350825 | FALSE | Neuron                 |
| AGGGTTT( db/m1 | db/m | 3048 | 0.036891 | FALSE | 1.166462 | FALSE | Endothelia Venous EC   |
| AGGGTTT( db/m1 | db/m | 604  | 0.037564 | FALSE | 1.22332  | FALSE | Photoreceptor          |
| AGGGTTT( db/m1 | db/m | 4913 | 0.023682 | FALSE | 0.806857 | FALSE | Photoreceptor          |
| AGGGTTT( db/m1 | db/m | 7133 | 0.011081 | FALSE | 0.919556 | FALSE | Photoreceptor          |
| AGGGTTT( db/m1 | db/m | 1327 | 0.014151 | FALSE | 0.962891 | FALSE | Photoreceptor          |
| AGGGTTT( db/m1 | db/m | 1771 | 0.051646 | FALSE | 1.567572 | FALSE | Photoreceptor          |

|                |      |      |          |       |          |       |                        |
|----------------|------|------|----------|-------|----------|-------|------------------------|
| AGGGTTTT db/m1 | db/m | 1959 | 0.073582 | FALSE | 1.609274 | FALSE | Photoreceptor          |
| AGGTAGG db/m1  | db/m | 5385 | 0.027273 | FALSE | 1.098922 | FALSE | Photoreceptor          |
| AGGTAGG db/m1  | db/m | 401  | 0.065957 | FALSE | 2.507606 | FALSE | Photoreceptor          |
| AGGTAGG db/m1  | db/m | 1789 | 0.030859 | FALSE | 1.383155 | FALSE | Photoreceptor          |
| AGGTAGG db/m1  | db/m | 1788 | 0.057037 | FALSE | 1.620559 | FALSE | Endothelia Capillary E |
| AGGTAGG db/m1  | db/m | 2128 | 0.006683 | FALSE | 1.415836 | FALSE | Neuron                 |
| AGGTCAT db/m1  | db/m | 3448 | 0.046906 | FALSE | 1.159379 | FALSE | Endothelia Venous EC   |
| AGGTCAT db/m1  | db/m | 5677 | 0.025416 | FALSE | 1.087992 | FALSE | Photoreceptor          |
| AGGTCAT db/m1  | db/m | 604  | 0.05065  | FALSE | 55.93221 | TRUE  |                        |
| AGGTCAT db/m1  | db/m | 736  | 0.035586 | FALSE | 1.233364 | FALSE | Photoreceptor          |
| AGGTCAT db/m1  | db/m | 3118 | 0.012052 | FALSE | 1.381446 | FALSE | Photoreceptor          |
| AGGTCAT db/m1  | db/m | 903  | 0.058205 | FALSE | 0.600329 | FALSE | Photoreceptor          |
| AGGTCTA db/m1  | db/m | 2821 | 0.098234 | FALSE | 1.626355 | FALSE | Endothelia Capillary E |
| AGGTCTA db/m1  | db/m | 1233 | 0.020171 | FALSE | 1.403205 | FALSE | Endothelia Capillary E |
| AGGTCTA db/m1  | db/m | 3001 | 0.018761 | FALSE | 1.218847 | FALSE | Endothelia Venous EC   |
| AGGTCTA db/m1  | db/m | 430  | 0.026796 | FALSE | 1.514601 | FALSE | Photoreceptor          |
| AGGTCTA db/m1  | db/m | 2763 | 0.011561 | FALSE | 1.465346 | FALSE | Photoreceptor          |
| AGGTCTA db/m1  | db/m | 8518 | 0.012557 | FALSE | 0.900983 | FALSE | Photoreceptor          |
| AGGTCTA db/m1  | db/m | 3511 | 0.138889 | TRUE  | 2.894301 | FALSE |                        |
| AGGTCTA db/m1  | db/m | 1073 | 0.021286 | FALSE | 0.888895 | FALSE | Photoreceptor          |
| AGGTCTA db/m1  | db/m | 6963 | 0.588076 | TRUE  | 3.066649 | FALSE |                        |
| AGGTCTA db/m1  | db/m | 2568 | 0.018761 | FALSE | 1.395533 | FALSE | Neuron                 |
| AGGTCTA db/m1  | db/m | 380  | 0.051646 | FALSE | 3.868104 | FALSE | Muller cell            |
| AGGTGTT db/m1  | db/m | 1147 | 0.035586 | FALSE | 1.77371  | FALSE | Photoreceptor          |
| AGGTTAC db/m1  | db/m | 2761 | 0.014151 | FALSE | 1.076876 | FALSE | Endothelia Capillary E |
| AGGTTAC db/m1  | db/m | 975  | 0.059406 | FALSE | 1.201092 | FALSE | Photoreceptor          |
| AGGTTAC db/m1  | db/m | 5517 | 0.032546 | FALSE | 0.877702 | FALSE | Photoreceptor          |
| AGGTTAC db/m1  | db/m | 1991 | 0.049679 | FALSE | 1.610813 | FALSE | Photoreceptor          |
| AGGTTAC db/m1  | db/m | 452  | 0.357022 | TRUE  | 9.210526 | TRUE  |                        |
| AGGTTAC db/m1  | db/m | 3058 | 0.011805 | FALSE | 1.036078 | FALSE | Endothelia Venous EC   |
| AGGTTAC db/m1  | db/m | 1243 | 0.060641 | FALSE | 1.915848 | FALSE | Photoreceptor          |
| AGGTTAC db/m1  | db/m | 2878 | 0.063221 | FALSE | 1.791487 | FALSE | Neuron                 |
| AGGTTAC db/m1  | db/m | 7345 | 0.021669 | FALSE | 0.898403 | FALSE | Photoreceptor          |
| AGGTTAC db/m1  | db/m | 3919 | 0.063221 | FALSE | 0.985018 | FALSE | Photoreceptor          |
| AGGTTACT db/m1 | db/m | 2425 | 0.04192  | FALSE | 1.713903 | FALSE | Pericyte               |
| AGGTTACT db/m1 | db/m | 1098 | 0.009277 | FALSE | 1.511872 | FALSE | Endothelia Capillary E |
| AGGTTGTT db/m1 | db/m | 918  | 0.006137 | FALSE | 1.774158 | FALSE | Pericyte               |
| AGGTTGTT db/m1 | db/m | 2649 | 0.080645 | FALSE | 5.03797  | TRUE  |                        |
| AGGTTGTT db/m1 | db/m | 2294 | 0.058205 | FALSE | 2.09289  | FALSE | Neuron                 |
| AGGTTGTT db/m1 | db/m | 5623 | 0.014429 | FALSE | 0.989104 | FALSE | Photoreceptor          |
| AGGTTGTT db/m1 | db/m | 2046 | 0.054795 | FALSE | 1.622546 | FALSE | Photoreceptor          |
| AGGTTGTT db/m1 | db/m | 1912 | 0.049679 | FALSE | 0.47435  | FALSE | Photoreceptor          |
| AGGTTGTT db/m1 | db/m | 1350 | 0.019455 | FALSE | 1.819925 | FALSE | Endothelia Capillary E |
| AGGTTGTT db/m1 | db/m | 266  | 0.034334 | FALSE | 47.47475 | TRUE  |                        |
| AGTAACCT db/m1 | db/m | 2293 | 0.043505 | FALSE | 1.2571   | FALSE | Photoreceptor          |
| AGTAACCT db/m1 | db/m | 3367 | 0.018761 | FALSE | 1.29928  | FALSE | Endothelia Venous EC   |
| AGTAACCT db/m1 | db/m | 4147 | 0.009277 | FALSE | 0.921582 | FALSE | Endothelia Aterial EC  |



|                |      |      |          |       |          |       |                         |
|----------------|------|------|----------|-------|----------|-------|-------------------------|
| AGTACCA# db/m1 | db/m | 6607 | 0.026796 | FALSE | 0.794719 | FALSE | Photoreceptor           |
| AGTACCA# db/m1 | db/m | 2499 | 0.014997 | FALSE | 0.85613  | FALSE | Endothelia Capillary EC |
| AGTACCA# db/m1 | db/m | 718  | 0.018761 | FALSE | 2.376904 | FALSE | Endothelia Capillary EC |
| AGTACCAC db/m1 | db/m | 399  | 0.006317 | FALSE | 0.894624 | FALSE | Photoreceptor           |
| AGTACCAC db/m1 | db/m | 488  | 0.016799 | FALSE | 2.605088 | FALSE | Photoreceptor           |
| AGTACCAT db/m1 | db/m | 3176 | 0.022455 | FALSE | 1.112609 | FALSE | Photoreceptor           |
| AGTACCAT db/m1 | db/m | 6644 | 0.112477 | TRUE  | 1.220175 | FALSE |                         |
| AGTACTG# db/m1 | db/m | 668  | 0.044326 | FALSE | 3.474788 | FALSE | Muller cell             |
| AGTACTG# db/m1 | db/m | 1413 | 0.012557 | FALSE | 1.281403 | FALSE | Endothelia Capillary EC |
| AGTACTGC db/m1 | db/m | 970  | 0.023266 | FALSE | 0.947548 | FALSE | Photoreceptor           |
| AGTACTGC db/m1 | db/m | 381  | 0.036891 | FALSE | 33.8438  | TRUE  |                         |
| AGTACTGT db/m1 | db/m | 1699 | 0.040404 | FALSE | 1.34105  | FALSE | Photoreceptor           |
| AGTACTGT db/m1 | db/m | 8547 | 0.010384 | FALSE | 0.77407  | FALSE | Photoreceptor           |
| AGTACTGT db/m1 | db/m | 439  | 0.054795 | FALSE | 1.136397 | FALSE | Photoreceptor           |
| AGTAGCT# db/m1 | db/m | 1724 | 0.018761 | FALSE | 1.702932 | FALSE | Endothelia Capillary EC |
| AGTAGCT# db/m1 | db/m | 517  | 0.025416 | FALSE | 4.859347 | FALSE | Muller cell             |
| AGTAGCTC db/m1 | db/m | 5247 | 0.051646 | FALSE | 0.806492 | FALSE | Photoreceptor           |
| AGTAGCTC db/m1 | db/m | 6353 | 0.007833 | FALSE | 0.878772 | FALSE | Photoreceptor           |
| AGTAGCTI db/m1 | db/m | 731  | 0.054795 | FALSE | 1.795209 | FALSE | Photoreceptor           |
| AGTAGTC# db/m1 | db/m | 2006 | 0.045165 | FALSE | 0.698495 | FALSE | Photoreceptor           |
| AGTAGTC# db/m1 | db/m | 1381 | 0.015879 | FALSE | 1.572544 | FALSE | Endothelia Capillary EC |
| AGTAGTC# db/m1 | db/m | 1352 | 0.018088 | FALSE | 1.679072 | FALSE | Endothelia Capillary EC |
| AGTAGTCC db/m1 | db/m | 956  | 0.095727 | FALSE | 7.072042 | TRUE  |                         |
| AGTAGTCC db/m1 | db/m | 1375 | 0.051646 | FALSE | 1.319668 | FALSE | Photoreceptor           |
| AGTAGTCC db/m1 | db/m | 666  | 0.008852 | FALSE | 1.940186 | FALSE | Endothelia Capillary EC |
| AGTAGTCC db/m1 | db/m | 2627 | 0.024971 | FALSE | 1.355978 | FALSE | Endothelia Capillary EC |
| AGTAGTCT db/m1 | db/m | 1285 | 0.048732 | FALSE | 2.036205 | FALSE | Endothelia Venous EC    |
| AGTCAAC# db/m1 | db/m | 3428 | 0.017434 | FALSE | 1.219714 | FALSE | Endothelia Capillary EC |
| AGTCAAC# db/m1 | db/m | 3366 | 0.026796 | FALSE | 1.328611 | FALSE | Endothelia Capillary EC |
| AGTCAACC db/m1 | db/m | 477  | 0.059406 | FALSE | 2.356656 | FALSE | Neuron                  |
| AGTCAACC db/m1 | db/m | 492  | 0.009277 | FALSE | 3.911609 | FALSE | Endothelia Capillary EC |
| AGTCAACC db/m1 | db/m | 2183 | 0.046906 | FALSE | 1.79254  | FALSE | Photoreceptor           |
| AGTCAACC db/m1 | db/m | 1417 | 0.020536 | FALSE | 1.4048   | FALSE | Endothelia Capillary EC |
| AGTCAACT db/m1 | db/m | 3772 | 0.021286 | FALSE | 0.845448 | FALSE | Photoreceptor           |
| AGTCAACT db/m1 | db/m | 8503 | 0.022857 | FALSE | 0.865449 | FALSE | Photoreceptor           |
| AGTCAACT db/m1 | db/m | 1035 | 0.064568 | FALSE | 0.983131 | FALSE | Photoreceptor           |
| AGTCAACT db/m1 | db/m | 434  | 0.067388 | FALSE | 4.376629 | FALSE | Endothelia Capillary EC |
| AGTCAACT db/m1 | db/m | 7053 | 0.334395 | TRUE  | 2.37855  | FALSE |                         |
| AGTCACAC db/m1 | db/m | 6667 | 0.016799 | FALSE | 0.564512 | FALSE | Photoreceptor           |
| AGTCATG# db/m1 | db/m | 2309 | 0.018088 | FALSE | 1.351858 | FALSE | Endothelia Capillary EC |
| AGTCATG# db/m1 | db/m | 396  | 0.055901 | FALSE | 2.48243  | FALSE | Photoreceptor           |
| AGTCATGC db/m1 | db/m | 1950 | 0.037564 | FALSE | 0.641415 | FALSE | Photoreceptor           |
| AGTCATGC db/m1 | db/m | 3381 | 0.04192  | FALSE | 1.184914 | FALSE | Endothelia Venous EC    |
| AGTCATGT db/m1 | db/m | 1998 | 0.034954 | FALSE | 1.70898  | FALSE | Endothelia Aterial EC   |
| AGTCATGT db/m1 | db/m | 1989 | 0.076994 | FALSE | 1.537579 | FALSE | Photoreceptor           |
| AGTCATGT db/m1 | db/m | 1133 | 0.08663  | FALSE | 0.881413 | FALSE | Photoreceptor           |
| AGTCATGT db/m1 | db/m | 9002 | 0.009277 | FALSE | 0.79656  | FALSE | Photoreceptor           |

|                |      |      |          |       |          |       |                         |
|----------------|------|------|----------|-------|----------|-------|-------------------------|
| AGTCTCCA db/m1 | db/m | 335  | 0.060641 | FALSE | 19.92263 | TRUE  |                         |
| AGTGACTC db/m1 | db/m | 1100 | 0.064568 | FALSE | 0.913977 | FALSE | Photoreceptor           |
| AGTGACTC db/m1 | db/m | 4268 | 0.058205 | FALSE | 1.340236 | FALSE | Photoreceptor           |
| AGTGACTC db/m1 | db/m | 1300 | 0.027758 | FALSE | 0.976705 | FALSE | Photoreceptor           |
| AGTGACTT db/m1 | db/m | 2217 | 0.012814 | FALSE | 1.393133 | FALSE | Endothelia Venous EC    |
| AGTGACTT db/m1 | db/m | 7721 | 0.015581 | FALSE | 0.666395 | FALSE | Photoreceptor           |
| AGTGACTT db/m1 | db/m | 2510 | 0.051646 | FALSE | 1.273427 | FALSE | Photoreceptor           |
| AGTGATCA db/m1 | db/m | 1304 | 0.159016 | TRUE  | 7.670044 | TRUE  |                         |
| AGTGATCA db/m1 | db/m | 4392 | 0.030859 | FALSE | 1.054596 | FALSE | Endothelia Capillary EC |
| AGTGATCC db/m1 | db/m | 2493 | 0.073582 | FALSE | 1.480826 | FALSE | Endothelia Capillary EC |
| AGTGATCC db/m1 | db/m | 944  | 0.042704 | FALSE | 1.68924  | FALSE | Photoreceptor           |
| AGTGATCT db/m1 | db/m | 4863 | 0.028754 | FALSE | 0.935078 | FALSE | Photoreceptor           |
| AGTGCCGA db/m1 | db/m | 3231 | 0.034334 | FALSE | 1.28052  | FALSE | Neuron                  |
| AGTGCCGA db/m1 | db/m | 380  | 0.034954 | FALSE | 4.073795 | FALSE | Muller cell             |
| AGTGCCGC db/m1 | db/m | 1692 | 0.018088 | FALSE | 1.599379 | FALSE | Endothelia Capillary EC |
| AGTGCCGC db/m1 | db/m | 2047 | 0.01981  | FALSE | 1.498243 | FALSE | Endothelia Venous EC    |
| AGTGCCGC db/m1 | db/m | 4972 | 0.023266 | FALSE | 0.88522  | FALSE | Photoreceptor           |
| AGTGCCGC db/m1 | db/m | 2369 | 0.018422 | FALSE | 1.142406 | FALSE | Photoreceptor           |
| AGTGCCGT db/m1 | db/m | 1530 | 0.114709 | TRUE  | 3.354595 | FALSE |                         |
| AGTGCCGT db/m1 | db/m | 988  | 0.065957 | FALSE | 2.641812 | FALSE | Pericyte                |
| AGTGTTGC db/m1 | db/m | 6375 | 0.138889 | TRUE  | 1.749422 | FALSE |                         |
| AGTGTTGC db/m1 | db/m | 1307 | 0.023682 | FALSE | 1.42302  | FALSE | Photoreceptor           |
| AGTGTTGC db/m1 | db/m | 1487 | 0.093319 | FALSE | 1.876705 | FALSE | Photoreceptor           |
| AGTGTTGC db/m1 | db/m | 475  | 0.017434 | FALSE | 2.578794 | FALSE | Muller cell             |
| AGTGTTGC db/m1 | db/m | 5501 | 0.011319 | FALSE | 0.94148  | FALSE | Photoreceptor           |
| AGTGTTGC db/m1 | db/m | 3238 | 0.010614 | FALSE | 1.03328  | FALSE | Endothelia Venous EC    |
| AGTGTTGC db/m1 | db/m | 368  | 0.082569 | FALSE | 8.835341 | TRUE  |                         |
| AGTGTTGC db/m1 | db/m | 3595 | 0.038953 | FALSE | 1.092207 | FALSE | Photoreceptor           |
| AGTGTTGT db/m1 | db/m | 541  | 0.010157 | FALSE | 2.868643 | FALSE | Endothelia Capillary EC |
| AGTGTTGT db/m1 | db/m | 2864 | 0.016799 | FALSE | 1.354552 | FALSE | Endothelia Capillary EC |
| AGTGTTGT db/m1 | db/m | 1645 | 0.122388 | TRUE  | 4.884135 | FALSE |                         |
| AGTTAGCA db/m1 | db/m | 1794 | 0.027273 | FALSE | 1.271359 | FALSE | Endothelia Capillary EC |
| AGTTAGCA db/m1 | db/m | 4496 | 0.043505 | FALSE | 0.960028 | FALSE | Photoreceptor           |
| AGTTAGCA db/m1 | db/m | 3350 | 0.019455 | FALSE | 1.082415 | FALSE | Endothelia Venous EC    |
| AGTTAGCC db/m1 | db/m | 831  | 0.038251 | FALSE | 1.765651 | FALSE | Photoreceptor           |
| AGTTAGCC db/m1 | db/m | 580  | 0.010846 | FALSE | 0.972472 | FALSE | Photoreceptor           |
| AGTTAGCC db/m1 | db/m | 2554 | 0.007058 | FALSE | 1.110494 | FALSE | Neuron                  |
| AGTTAGCT db/m1 | db/m | 1972 | 0.177638 | TRUE  | 16.97093 | TRUE  |                         |
| AGTTCCCA db/m1 | db/m | 8272 | 0.031411 | FALSE | 0.793471 | FALSE | Photoreceptor           |
| AGTTCCCC db/m1 | db/m | 1010 | 0.009712 | FALSE | 1.686274 | FALSE | Pericyte                |
| AGTTCCCC db/m1 | db/m | 519  | 0.042704 | FALSE | 2.931041 | FALSE | Muller cell             |
| AGTTCCCC db/m1 | db/m | 3257 | 0.091004 | FALSE | 5.726872 | TRUE  |                         |
| AGTTCCCT db/m1 | db/m | 1407 | 0.016488 | FALSE | 1.201265 | FALSE | Endothelia Capillary EC |
| AGTTCCCT db/m1 | db/m | 6060 | 0.037564 | FALSE | 1.056687 | FALSE | Photoreceptor           |
| AGTTCCCT db/m1 | db/m | 4127 | 0.020908 | FALSE | 1.369099 | FALSE | Photoreceptor           |
| AGTTCGAA db/m1 | db/m | 8458 | 0.016181 | FALSE | 0.852435 | FALSE | Photoreceptor           |
| AGTTCGAC db/m1 | db/m | 425  | 0.013338 | FALSE | 3.006871 | FALSE | Muller cell             |

|                |      |      |          |       |          |       |                        |
|----------------|------|------|----------|-------|----------|-------|------------------------|
| AGTTCGAC db/m1 | db/m | 683  | 0.13452  | TRUE  | 19.38406 | TRUE  |                        |
| AGTTCGAC db/m1 | db/m | 1432 | 0.022059 | FALSE | 1.277353 | FALSE | Endothelia Capillary E |
| AGTTCGAC db/m1 | db/m | 5789 | 0.041154 | FALSE | 1.14249  | FALSE | Photoreceptor          |
| AGTTCGAC db/m1 | db/m | 3109 | 0.023682 | FALSE | 1.028236 | FALSE | Endothelia Capillary E |
| AGTTCGAC db/m1 | db/m | 649  | 0.05065  | FALSE | 3.986302 | FALSE | Muller cell            |
| AGTTCGAT db/m1 | db/m | 350  | 0.115723 | TRUE  | 24.18773 | TRUE  |                        |
| ATACCGA db/m1  | db/m | 1724 | 0.017434 | FALSE | 1.419363 | FALSE | Endothelia Capillary E |
| ATACCGA db/m1  | db/m | 1053 | 0.019106 | FALSE | 0.65924  | FALSE | Photoreceptor          |
| ATACCGA db/m1  | db/m | 4698 | 0.023682 | FALSE | 1.183944 | FALSE | Photoreceptor          |
| ATACCGA db/m1  | db/m | 1369 | 0.08663  | FALSE | 2.445829 | FALSE | Muller cell            |
| ATACCGA db/m1  | db/m | 599  | 0.065957 | FALSE | 3.556098 | FALSE | Muller cell            |
| ATACCGAC db/m1 | db/m | 6584 | 0.010384 | FALSE | 1.035858 | FALSE | Photoreceptor          |
| ATACCGAC db/m1 | db/m | 1121 | 0.040404 | FALSE | 0.910823 | FALSE | Photoreceptor          |
| ATACCGAC db/m1 | db/m | 1297 | 0.068864 | FALSE | 1.628423 | FALSE | Photoreceptor          |
| ATACCGAT db/m1 | db/m | 1424 | 0.021286 | FALSE | 4.446981 | FALSE | Muller cell            |
| ATACCGAT db/m1 | db/m | 6192 | 0.015287 | FALSE | 1.030977 | FALSE | Photoreceptor          |
| ATACCTTA db/m1 | db/m | 7844 | 0.028754 | FALSE | 0.788835 | FALSE | Photoreceptor          |
| ATACCTTA db/m1 | db/m | 418  | 0.014429 | FALSE | 1.256013 | FALSE | Photoreceptor          |
| ATACCTTA db/m1 | db/m | 861  | 0.070386 | FALSE | 0.791506 | FALSE | Photoreceptor          |
| ATACCTTC db/m1 | db/m | 913  | 0.088776 | FALSE | 1.101592 | FALSE | Photoreceptor          |
| ATACCTTG db/m1 | db/m | 827  | 0.027273 | FALSE | 2.459244 | FALSE | Photoreceptor          |
| ATACCTTT db/m1 | db/m | 5980 | 0.024534 | FALSE | 0.828889 | FALSE | Photoreceptor          |
| ATACCTTT db/m1 | db/m | 7114 | 0.008852 | FALSE | 1.039668 | FALSE | Photoreceptor          |
| ATACTTCA db/m1 | db/m | 3407 | 0.040404 | FALSE | 1.230272 | FALSE | Photoreceptor          |
| ATACTTCG db/m1 | db/m | 1589 | 0.025868 | FALSE | 2.084515 | FALSE | Endothelia Venous EC   |
| ATACTTCT db/m1 | db/m | 691  | 0.044326 | FALSE | 1.580238 | FALSE | Photoreceptor          |
| ATACTTCT db/m1 | db/m | 1602 | 0.018088 | FALSE | 1.491994 | FALSE | Endothelia Aterial EC  |
| ATAGACCA db/m1 | db/m | 982  | 0.043505 | FALSE | 3.717453 | FALSE | Muller cell            |
| ATAGACCC db/m1 | db/m | 414  | 0.014151 | FALSE | 3.365872 | FALSE | Muller cell            |
| ATAGACCC db/m1 | db/m | 742  | 0.020536 | FALSE | 1.88569  | FALSE | Photoreceptor          |
| ATAGACCC db/m1 | db/m | 684  | 0.014997 | FALSE | 1.897487 | FALSE | Microglia              |
| ATAGACCT db/m1 | db/m | 407  | 0.061912 | FALSE | 1.337811 | FALSE | Photoreceptor          |
| ATAGACCT db/m1 | db/m | 4026 | 0.055901 | FALSE | 0.821235 | FALSE | Photoreceptor          |
| ATAGAGA db/m1  | db/m | 397  | 0.022059 | FALSE | 4.099235 | FALSE | Photoreceptor          |
| ATAGAGA db/m1  | db/m | 1802 | 0.091004 | FALSE | 2.173519 | FALSE | Photoreceptor          |
| ATAGAGA db/m1  | db/m | 1281 | 0.051646 | FALSE | 1.599326 | FALSE | Photoreceptor          |
| ATAGAGA db/m1  | db/m | 1044 | 0.109375 | TRUE  | 4.433793 | FALSE |                        |
| ATAGAGA db/m1  | db/m | 6341 | 0.034954 | FALSE | 1.05208  | FALSE | Photoreceptor          |
| ATAGAGA db/m1  | db/m | 1739 | 0.023266 | FALSE | 1.429568 | FALSE | Endothelia Capillary E |
| ATAGAGA db/m1  | db/m | 4218 | 0.070386 | FALSE | 1.166802 | FALSE | Neuron                 |
| ATAGAGA db/m1  | db/m | 643  | 0.031411 | FALSE | 64.38084 | TRUE  |                        |
| ATAGAGA db/m1  | db/m | 559  | 0.046906 | FALSE | 0.388599 | FALSE | Photoreceptor          |
| ATAGAGA db/m1  | db/m | 351  | 0.057037 | FALSE | 3.090368 | FALSE | Microglia              |
| ATAGGCTA db/m1 | db/m | 3047 | 0.065957 | FALSE | 1.622069 | FALSE | Photoreceptor          |
| ATAGGCTA db/m1 | db/m | 2558 | 0.025416 | FALSE | 0.902398 | FALSE | Photoreceptor          |
| ATAGGCTC db/m1 | db/m | 486  | 0.15354  | TRUE  | 17.69042 | TRUE  |                        |
| ATAGGCTC db/m1 | db/m | 3548 | 0.041154 | FALSE | 1.428361 | FALSE | Photoreceptor          |

|                |      |      |          |       |          |       |                        |
|----------------|------|------|----------|-------|----------|-------|------------------------|
| ATAGGCTC db/m1 | db/m | 1467 | 0.026328 | FALSE | 0.946485 | FALSE | Photoreceptor          |
| ATAGGCTC db/m1 | db/m | 4847 | 0.036232 | FALSE | 0.958514 | FALSE | Photoreceptor          |
| ATAGGCTC db/m1 | db/m | 1794 | 0.071958 | FALSE | 1.694865 | FALSE | Photoreceptor          |
| ATAGGCTC db/m1 | db/m | 1200 | 0.012557 | FALSE | 1.098984 | FALSE | Endothelia Capillary E |
| ATAGGCTC db/m1 | db/m | 1058 | 0.059406 | FALSE | 1.305564 | FALSE | Photoreceptor          |
| ATAGGCTT db/m1 | db/m | 973  | 0.038251 | FALSE | 1.428378 | FALSE | Photoreceptor          |
| ATATCCTC db/m1 | db/m | 1554 | 0.091004 | FALSE | 2.027106 | FALSE | Photoreceptor          |
| ATATCCTC db/m1 | db/m | 2579 | 0.04192  | FALSE | 1.103771 | FALSE | Microglia              |
| ATATCCTC db/m1 | db/m | 716  | 0.038251 | FALSE | 0.642444 | FALSE | Photoreceptor          |
| ATATCCTG db/m1 | db/m | 3110 | 0.017758 | FALSE | 1.4859   | FALSE | Photoreceptor          |
| ATATCCTT db/m1 | db/m | 1412 | 0.039671 | FALSE | 0.818206 | FALSE | Photoreceptor          |
| ATATCCTT db/m1 | db/m | 1240 | 0.113205 | TRUE  | 2.133995 | FALSE |                        |
| ATCACAGT db/m1 | db/m | 1649 | 0.082569 | FALSE | 2.043841 | FALSE | Endothelia Capillary E |
| ATCACAGT db/m1 | db/m | 4120 | 0.095727 | FALSE | 8.256565 | TRUE  |                        |
| ATCACAGC db/m1 | db/m | 837  | 0.051646 | FALSE | 0.839164 | FALSE | Photoreceptor          |
| ATCACAGC db/m1 | db/m | 835  | 0.061912 | FALSE | 1.946458 | FALSE | Photoreceptor          |
| ATCACAGC db/m1 | db/m | 1171 | 0.078788 | FALSE | 16.96751 | TRUE  |                        |
| ATCACAGC db/m1 | db/m | 2890 | 0.014151 | FALSE | 1.12877  | FALSE | Endothelia Venous EC   |
| ATCACAGC db/m1 | db/m | 1279 | 0.051646 | FALSE | 1.53364  | FALSE | Photoreceptor          |
| ATCACAGT db/m1 | db/m | 6755 | 0.031973 | FALSE | 0.845773 | FALSE | Photoreceptor          |
| ATCACAGT db/m1 | db/m | 6379 | 0.007833 | FALSE | 1.049393 | FALSE | Photoreceptor          |
| ATCACAGT db/m1 | db/m | 496  | 0.041154 | FALSE | 3.524167 | FALSE | Endothelia Capillary E |
| ATCACAGT db/m1 | db/m | 2552 | 0.042704 | FALSE | 1.866703 | FALSE | Photoreceptor          |
| ATCACGAC db/m1 | db/m | 9292 | 0.011319 | FALSE | 0.850838 | FALSE | Photoreceptor          |
| ATCACGAC db/m1 | db/m | 1518 | 0.116198 | TRUE  | 4.057279 | FALSE |                        |
| ATCACGAC db/m1 | db/m | 354  | 0.088776 | FALSE | 12.92135 | TRUE  |                        |
| ATCACGAC db/m1 | db/m | 567  | 0.076994 | FALSE | 1.74679  | FALSE | Photoreceptor          |
| ATCACGAT db/m1 | db/m | 3693 | 0.031973 | FALSE | 1.038824 | FALSE | Photoreceptor          |
| ATCACTTT db/m1 | db/m | 1270 | 0.084562 | FALSE | 1.838721 | FALSE | Photoreceptor          |
| ATCACTTT db/m1 | db/m | 4558 | 0.059406 | FALSE | 1.360447 | FALSE | Photoreceptor          |
| ATCACTTT db/m1 | db/m | 246  | 0.044326 | FALSE | 19.29134 | TRUE  |                        |
| ATCACTTT db/m1 | db/m | 3278 | 0.068864 | FALSE | 1.553564 | FALSE | Muller cell            |
| ATCAGGT/ db/m1 | db/m | 866  | 0.020908 | FALSE | 1.164308 | FALSE | Photoreceptor          |
| ATCAGGTC db/m1 | db/m | 5688 | 0.048732 | FALSE | 0.846097 | FALSE | Photoreceptor          |
| ATCAGGTC db/m1 | db/m | 1899 | 0.148377 | TRUE  | 7.997895 | TRUE  |                        |
| ATCAGGTC db/m1 | db/m | 1259 | 0.011805 | FALSE | 1.328523 | FALSE | Endothelia Capillary E |
| ATCAGGTC db/m1 | db/m | 479  | 0.014997 | FALSE | 2.558606 | FALSE | Muller cell            |
| ATCAGGTI db/m1 | db/m | 633  | 0.024971 | FALSE | 2.637658 | FALSE | Photoreceptor          |
| ATCAGGTI db/m1 | db/m | 4730 | 0.027273 | FALSE | 1.04399  | FALSE | Endothelia Capillary E |
| ATCATTCA db/m1 | db/m | 873  | 0.028754 | FALSE | 1.260554 | FALSE | Photoreceptor          |
| ATCATTCA db/m1 | db/m | 1016 | 0.017758 | FALSE | 1.896841 | FALSE | Pericyte               |
| ATCATTCC db/m1 | db/m | 3110 | 0.024971 | FALSE | 1.280113 | FALSE | Photoreceptor          |
| ATCATTCC db/m1 | db/m | 820  | 0.025868 | FALSE | 1.161563 | FALSE | Photoreceptor          |
| ATCATTCT db/m1 | db/m | 4210 | 0.016181 | FALSE | 1.152458 | FALSE | Endothelia Capillary E |
| ATCCACCC db/m1 | db/m | 1292 | 0.046906 | FALSE | 1.41362  | FALSE | Photoreceptor          |
| ATCCACCC db/m1 | db/m | 526  | 0.021669 | FALSE | 2.51956  | FALSE | Photoreceptor          |
| ATCCACCC db/m1 | db/m | 4914 | 0.015879 | FALSE | 1.130446 | FALSE | Photoreceptor          |

|                |      |      |          |       |          |       |                        |
|----------------|------|------|----------|-------|----------|-------|------------------------|
| ATCCACCT db/m1 | db/m | 613  | 0.026796 | FALSE | 53.16708 | TRUE  |                        |
| ATCCATTC db/m1 | db/m | 7344 | 0.020536 | FALSE | 0.684268 | FALSE | Photoreceptor          |
| ATCCATTG db/m1 | db/m | 1248 | 0.020908 | FALSE | 1.595398 | FALSE | Endothelia Capillary E |
| ATCCATTG db/m1 | db/m | 8604 | 0.012303 | FALSE | 0.731299 | FALSE | Photoreceptor          |
| ATCCATTG db/m1 | db/m | 8386 | 0.048732 | FALSE | 0.727262 | FALSE | Photoreceptor          |
| ATCCATTT db/m1 | db/m | 1500 | 0.061912 | FALSE | 1.624942 | FALSE | Photoreceptor          |
| ATCCATTT db/m1 | db/m | 895  | 0.046906 | FALSE | 47.45018 | TRUE  |                        |
| ATCCCTGC db/m1 | db/m | 4643 | 0.058205 | FALSE | 1.21622  | FALSE | Photoreceptor          |
| ATCCCTGC db/m1 | db/m | 2586 | 0.002901 | FALSE | 1.240967 | FALSE | Neuron                 |
| ATCCCTGC db/m1 | db/m | 2508 | 0.082569 | FALSE | 1.653037 | FALSE | Neuron                 |
| ATCCCTGC db/m1 | db/m | 921  | 0.022857 | FALSE | 1.208382 | FALSE | Photoreceptor          |
| ATCCCTGC db/m1 | db/m | 4288 | 0.012814 | FALSE | 1.392609 | FALSE | Photoreceptor          |
| ATCCCTGC db/m1 | db/m | 4507 | 0.022857 | FALSE | 1.042156 | FALSE | Photoreceptor          |
| ATCCCTGC db/m1 | db/m | 9106 | 0.013605 | FALSE | 0.755099 | FALSE | Photoreceptor          |
| ATCCCTGC db/m1 | db/m | 2637 | 0.053718 | FALSE | 1.163107 | FALSE | Photoreceptor          |
| ATCCCTGT db/m1 | db/m | 1567 | 0.065957 | FALSE | 1.524219 | FALSE | Photoreceptor          |
| ATCCGTCA db/m1 | db/m | 4182 | 0.027758 | FALSE | 1.033337 | FALSE | Photoreceptor          |
| ATCCGTCA db/m1 | db/m | 3909 | 0.130374 | TRUE  | 3.523584 | FALSE |                        |
| ATCCGTCC db/m1 | db/m | 473  | 0.084562 | FALSE | 2.239197 | FALSE | Neuron                 |
| ATCCGTCC db/m1 | db/m | 2962 | 0.023682 | FALSE | 1.02557  | FALSE | Endothelia Capillary E |
| ATCCGTCC db/m1 | db/m | 2151 | 0.08663  | FALSE | 1.542916 | FALSE | Endothelia Capillary E |
| ATCCGTCC db/m1 | db/m | 1530 | 0.053718 | FALSE | 1.596572 | FALSE | Photoreceptor          |
| ATCCGTCT db/m1 | db/m | 1226 | 0.041154 | FALSE | 2.233546 | FALSE | Photoreceptor          |
| ATCCTATA db/m1 | db/m | 6074 | 0.008438 | FALSE | 0.931635 | FALSE | Photoreceptor          |
| ATCCTATA db/m1 | db/m | 1163 | 0.031411 | FALSE | 1.22243  | FALSE | Photoreceptor          |
| ATCCTATA db/m1 | db/m | 3166 | 0.024971 | FALSE | 1.042312 | FALSE | Photoreceptor          |
| ATCCTATA db/m1 | db/m | 2373 | 0.027758 | FALSE | 1.63204  | FALSE | Pericyte               |
| ATCCTATA db/m1 | db/m | 2791 | 0.017758 | FALSE | 1.228801 | FALSE | Endothelia Capillary E |
| ATCCTATA db/m1 | db/m | 451  | 0.061912 | FALSE | 5.642633 | TRUE  |                        |
| ATCCTATC db/m1 | db/m | 3861 | 0.019106 | FALSE | 1.264979 | FALSE | Photoreceptor          |
| ATCCTATC db/m1 | db/m | 4948 | 0.029266 | FALSE | 1.011048 | FALSE | Photoreceptor          |
| ATCCTATC db/m1 | db/m | 6835 | 0.031973 | FALSE | 0.972006 | FALSE | Photoreceptor          |
| ATCCTATG db/m1 | db/m | 7330 | 0.057037 | FALSE | 0.732514 | FALSE | Photoreceptor          |
| ATCCTATG db/m1 | db/m | 2166 | 0.078788 | FALSE | 1.1302   | FALSE | Photoreceptor          |
| ATCCTATG db/m1 | db/m | 3377 | 0.030859 | FALSE | 1.024898 | FALSE | Endothelia Capillary E |
| ATCCTATT db/m1 | db/m | 4910 | 0.130374 | TRUE  | 6.864551 | TRUE  |                        |
| ATCGATG db/m1  | db/m | 651  | 0.03313  | FALSE | 1.125996 | FALSE | Photoreceptor          |
| ATCGATG db/m1  | db/m | 7915 | 0.012303 | FALSE | 0.788296 | FALSE | Photoreceptor          |
| ATCGATG db/m1  | db/m | 4790 | 0.016181 | FALSE | 0.382809 | FALSE | Photoreceptor          |
| ATCGATG db/m1  | db/m | 3577 | 0.036232 | FALSE | 1.065722 | FALSE | Photoreceptor          |
| ATCGATG db/m1  | db/m | 3042 | 0.036232 | FALSE | 1.15897  | FALSE | Neuron                 |
| ATCGATG db/m1  | db/m | 2271 | 0.080645 | FALSE | 1.22809  | FALSE | Photoreceptor          |
| ATCGATG db/m1  | db/m | 527  | 0.015287 | FALSE | 1.012598 | FALSE | Photoreceptor          |
| ATCGATG db/m1  | db/m | 2321 | 0.024534 | FALSE | 1.244996 | FALSE | Endothelia Venous EC   |
| ATCGATG db/m1  | db/m | 1552 | 0.024971 | FALSE | 1.321244 | FALSE | Endothelia Capillary E |
| ATCGATG db/m1  | db/m | 1505 | 0.032546 | FALSE | 2.376637 | FALSE | Neuron                 |
| ATCGATG db/m1  | db/m | 1758 | 0.016181 | FALSE | 1.359439 | FALSE | Endothelia Capillary E |

|                |      |      |          |       |          |       |                        |
|----------------|------|------|----------|-------|----------|-------|------------------------|
| ATCGCCTA db/m1 | db/m | 550  | 0.065957 | FALSE | 1.092172 | FALSE | Photoreceptor          |
| ATCGCCTA db/m1 | db/m | 4541 | 0.023266 | FALSE | 1.005686 | FALSE | Endothelia Venous EC   |
| ATCGCCTC db/m1 | db/m | 508  | 0.006499 | FALSE | 1.624    | FALSE | Photoreceptor          |
| ATCGCCTC db/m1 | db/m | 1186 | 0.076994 | FALSE | 18.11225 | TRUE  |                        |
| ATCGCCTG db/m1 | db/m | 1526 | 0.095727 | FALSE | 1.812446 | FALSE | Photoreceptor          |
| ATCGCCTT db/m1 | db/m | 443  | 0.029787 | FALSE | 2.015005 | FALSE | Photoreceptor          |
| ATCGGAT/ db/m1 | db/m | 852  | 0.043505 | FALSE | 2.224102 | FALSE | Photoreceptor          |
| ATCGGATC db/m1 | db/m | 3209 | 0.024105 | FALSE | 1.576193 | FALSE | Photoreceptor          |
| ATCGGATC db/m1 | db/m | 5018 | 0.025416 | FALSE | 1.100432 | FALSE | Photoreceptor          |
| ATCGGATC db/m1 | db/m | 5192 | 0.148377 | TRUE  | 6.373713 | TRUE  |                        |
| ATCGGATC db/m1 | db/m | 6208 | 0.012303 | FALSE | 0.945563 | FALSE | Photoreceptor          |
| ATCGGATT db/m1 | db/m | 4131 | 0.029266 | FALSE | 1.157889 | FALSE | Endothelia Capillary E |
| ATCGGCG/ db/m1 | db/m | 567  | 0.095727 | FALSE | 23.05195 | TRUE  |                        |
| ATCGGCG/ db/m1 | db/m | 1754 | 0.024534 | FALSE | 1.487777 | FALSE | Endothelia Capillary E |
| ATCGGCG/ db/m1 | db/m | 441  | 0.080645 | FALSE | 3.696849 | FALSE | Photoreceptor          |
| ATCGGCGC db/m1 | db/m | 1864 | 0.046025 | FALSE | 1.961115 | FALSE | Endothelia Capillary E |
| ATCGGCGC db/m1 | db/m | 2061 | 0.045165 | FALSE | 1.65951  | FALSE | Photoreceptor          |
| ATCGGCGT db/m1 | db/m | 4726 | 0.008644 | FALSE | 1.108118 | FALSE | Photoreceptor          |
| ATCGTAG/ db/m1 | db/m | 659  | 0.011081 | FALSE | 2.013461 | FALSE | Endothelia Capillary E |
| ATCGTAG/ db/m1 | db/m | 2779 | 0.051646 | FALSE | 1.733704 | FALSE | Photoreceptor          |
| ATCGTAG/ db/m1 | db/m | 981  | 0.059406 | FALSE | 1.727633 | FALSE | Neuron                 |
| ATCGTAGC db/m1 | db/m | 2184 | 0.045165 | FALSE | 1.521159 | FALSE | Endothelia Capillary E |
| ATCGTAGC db/m1 | db/m | 7061 | 0.011319 | FALSE | 0.918708 | FALSE | Photoreceptor          |
| ATCGTAGC db/m1 | db/m | 1477 | 0.100845 | TRUE  | 13.30517 | TRUE  |                        |
| ATCGTAGC db/m1 | db/m | 1857 | 0.031973 | FALSE | 1.081334 | FALSE | Photoreceptor          |
| ATCGTAGT db/m1 | db/m | 4703 | 0.023682 | FALSE | 1.114656 | FALSE | Photoreceptor          |
| ATCGTAGT db/m1 | db/m | 3972 | 0.030859 | FALSE | 1.067464 | FALSE | Endothelia Capillary E |
| ATCGTAGT db/m1 | db/m | 4257 | 0.164835 | TRUE  | 2.656802 | FALSE |                        |
| ATCGTAGT db/m1 | db/m | 6727 | 0.053718 | FALSE | 1.131315 | FALSE | Photoreceptor          |
| ATCGTAGT db/m1 | db/m | 677  | 0.031973 | FALSE | 1.606596 | FALSE | Photoreceptor          |
| ATCGTCCC db/m1 | db/m | 1687 | 0.08663  | FALSE | 2.116726 | FALSE | Photoreceptor          |
| ATCGTCCC db/m1 | db/m | 3728 | 0.067388 | FALSE | 1.172944 | FALSE | Endothelia Capillary E |
| ATCGTCCC db/m1 | db/m | 383  | 0.010614 | FALSE | 3.079216 | FALSE | Photoreceptor          |
| ATCGTCCT db/m1 | db/m | 2281 | 0.03313  | FALSE | 1.486496 | FALSE | Endothelia Capillary E |
| ATCGTCCT db/m1 | db/m | 2284 | 0.024971 | FALSE | 1.360002 | FALSE | Photoreceptor          |
| ATCGTCCT db/m1 | db/m | 8379 | 0.034334 | FALSE | 0.74666  | FALSE | Photoreceptor          |
| ATCGTCCT db/m1 | db/m | 720  | 0.048732 | FALSE | 2.868861 | FALSE | Muller cell            |
| ATCGTGA/ db/m1 | db/m | 3441 | 0.010157 | FALSE | 1.081855 | FALSE | Endothelia Venous EC   |
| ATCGTGA/ db/m1 | db/m | 542  | 0.036891 | FALSE | 0.748137 | FALSE | Photoreceptor          |
| ATCGTGAC db/m1 | db/m | 987  | 0.026328 | FALSE | 0.43121  | FALSE | Photoreceptor          |
| ATCGTGAC db/m1 | db/m | 887  | 0.093319 | FALSE | 1.648664 | FALSE | Photoreceptor          |
| ATCGTGAC db/m1 | db/m | 1421 | 0.052669 | FALSE | 1.203331 | FALSE | Photoreceptor          |
| ATCGTGAC db/m1 | db/m | 1198 | 0.082569 | FALSE | 1.981776 | FALSE | Photoreceptor          |
| ATCGTGAT db/m1 | db/m | 765  | 0.063221 | FALSE | 1.196285 | FALSE | Photoreceptor          |
| ATCTCTAA db/m1 | db/m | 924  | 0.036232 | FALSE | 1.346119 | FALSE | Photoreceptor          |
| ATCTCTAA db/m1 | db/m | 2382 | 0.05065  | FALSE | 1.951447 | FALSE | Photoreceptor          |
| ATCTCTAC db/m1 | db/m | 919  | 0.024971 | FALSE | 0.53552  | FALSE | Photoreceptor          |

|                |      |      |          |       |          |       |                        |
|----------------|------|------|----------|-------|----------|-------|------------------------|
| ATCTCTAC db/m1 | db/m | 2443 | 0.067388 | FALSE | 0.997047 | FALSE | Photoreceptor          |
| ATCTCTAC db/m1 | db/m | 5943 | 0.045165 | FALSE | 1.063134 | FALSE | Photoreceptor          |
| ATCTCTAC db/m1 | db/m | 8791 | 0.017114 | FALSE | 0.629951 | FALSE | Photoreceptor          |
| ATCTCTAC db/m1 | db/m | 487  | 0.033726 | FALSE | 2.085716 | FALSE | Photoreceptor          |
| ATCTCTAG db/m1 | db/m | 1898 | 0.031411 | FALSE | 1.14134  | FALSE | Photoreceptor          |
| ATCTCTAG db/m1 | db/m | 7823 | 0.01981  | FALSE | 0.744036 | FALSE | Photoreceptor          |
| ATCTCTAT db/m1 | db/m | 7087 | 0.010157 | FALSE | 0.903956 | FALSE | Photoreceptor          |
| ATCTTCAA db/m1 | db/m | 1636 | 0.014997 | FALSE | 1.248452 | FALSE | Endothelia Capillary E |
| ATCTTCAC db/m1 | db/m | 480  | 0.021286 | FALSE | 1.036356 | FALSE | Photoreceptor          |
| ATCTTCAG db/m1 | db/m | 7717 | 0.026328 | FALSE | 0.735985 | FALSE | Photoreceptor          |
| ATCTTCAG db/m1 | db/m | 726  | 0.048732 | FALSE | 2.52445  | FALSE | Photoreceptor          |
| ATCTTCAT db/m1 | db/m | 775  | 0.028754 | FALSE | 2.201276 | FALSE | Muller cell            |
| ATCTTCAT db/m1 | db/m | 4233 | 0.020908 | FALSE | 1.120931 | FALSE | Endothelia Capillary E |
| ATCTTCAT db/m1 | db/m | 7952 | 0.029787 | FALSE | 0.838185 | FALSE | Photoreceptor          |
| ATGAAAG db/m1  | db/m | 1204 | 0.022455 | FALSE | 0.289399 | FALSE | Photoreceptor          |
| ATGAAAG db/m1  | db/m | 1667 | 0.065957 | FALSE | 1.436139 | FALSE | Endothelia Capillary E |
| ATGAAAG db/m1  | db/m | 6604 | 0.122691 | TRUE  | 3.764034 | FALSE |                        |
| ATGAAAG db/m1  | db/m | 401  | 0.058205 | FALSE | 2.328754 | FALSE | Photoreceptor          |
| ATGAAAG db/m1  | db/m | 980  | 0.058205 | FALSE | 0.905656 | FALSE | Photoreceptor          |
| ATGAAAG db/m1  | db/m | 1301 | 0.039671 | FALSE | 2.494575 | FALSE | Endothelia Capillary E |
| ATGAAAG db/m1  | db/m | 665  | 0.037564 | FALSE | 1.203672 | FALSE | Photoreceptor          |
| ATGAAAG db/m1  | db/m | 1674 | 0.027273 | FALSE | 1.662929 | FALSE | Endothelia Capillary E |
| ATGAAAG db/m1  | db/m | 946  | 0.046906 | FALSE | 1.588881 | FALSE | Photoreceptor          |
| ATGACCAC db/m1 | db/m | 390  | 0.049679 | FALSE | 3.98334  | FALSE | Muller cell            |
| ATGACCAC db/m1 | db/m | 2319 | 0.005264 | FALSE | 1.342193 | FALSE | Neuron                 |
| ATGACCAT db/m1 | db/m | 3085 | 0.018761 | FALSE | 1.18482  | FALSE | Endothelia Venous EC   |
| ATGACCAT db/m1 | db/m | 4521 | 0.042704 | FALSE | 0.93875  | FALSE | Photoreceptor          |
| ATGAGGG db/m1  | db/m | 789  | 0.03313  | FALSE | 0.779355 | FALSE | Photoreceptor          |
| ATGAGGG db/m1  | db/m | 463  | 0.025868 | FALSE | 2.409817 | FALSE | Endothelia Capillary E |
| ATGAGGG db/m1  | db/m | 406  | 0.028251 | FALSE | 1.718775 | FALSE | Photoreceptor          |
| ATGAGGG db/m1  | db/m | 4454 | 0.020536 | FALSE | 0.782018 | FALSE | Photoreceptor          |
| ATGAGTCC db/m1 | db/m | 917  | 0.035586 | FALSE | 4.758381 | FALSE | Muller cell            |
| ATGAGTCC db/m1 | db/m | 3265 | 0.036232 | FALSE | 1.565573 | FALSE | Photoreceptor          |
| ATGAGTCC db/m1 | db/m | 1110 | 0.014429 | FALSE | 1.880792 | FALSE | Endothelia Capillary E |
| ATGAGTCC db/m1 | db/m | 4122 | 0.020536 | FALSE | 1.090591 | FALSE | Endothelia Venous EC   |
| ATGAGTCT db/m1 | db/m | 524  | 0.065957 | FALSE | 1.257714 | FALSE | Photoreceptor          |
| ATGAGTCT db/m1 | db/m | 1827 | 0.034334 | FALSE | 0.791343 | FALSE | Photoreceptor          |
| ATGATCG db/m1  | db/m | 5067 | 0.045165 | FALSE | 0.846182 | FALSE | Endothelia Venous EC   |
| ATGATCG db/m1  | db/m | 728  | 0.030318 | FALSE | 2.569574 | FALSE | Pericyte               |
| ATGATCG db/m1  | db/m | 5669 | 0.023682 | FALSE | 0.86775  | FALSE | Photoreceptor          |
| ATGATCG db/m1  | db/m | 5258 | 0.073582 | FALSE | 0.931453 | FALSE | Photoreceptor          |
| ATGATCG db/m1  | db/m | 4117 | 0.033726 | FALSE | 0.96617  | FALSE | Photoreceptor          |
| ATGATCG db/m1  | db/m | 2773 | 0.048732 | FALSE | 1.214126 | FALSE | Photoreceptor          |
| ATGCATGC db/m1 | db/m | 5572 | 0.027273 | FALSE | 0.675437 | FALSE | Photoreceptor          |
| ATGCATGC db/m1 | db/m | 1659 | 0.060641 | FALSE | 0.674526 | FALSE | Neuron                 |
| ATGCATGC db/m1 | db/m | 8368 | 0.049679 | FALSE | 0.759059 | FALSE | Photoreceptor          |
| ATGCATGT db/m1 | db/m | 1182 | 0.023266 | FALSE | 0.435684 | FALSE | Photoreceptor          |

|                |      |      |          |       |          |       |                        |
|----------------|------|------|----------|-------|----------|-------|------------------------|
| ATGCCTCA db/m1 | db/m | 3639 | 0.061912 | FALSE | 1.392077 | FALSE | Photoreceptor          |
| ATGCCTCA db/m1 | db/m | 7672 | 0.031411 | FALSE | 0.882856 | FALSE | Photoreceptor          |
| ATGCCTCA db/m1 | db/m | 2082 | 0.011561 | FALSE | 1.311416 | FALSE | Endothelia Capillary E |
| ATGCCTCA db/m1 | db/m | 2751 | 0.037564 | FALSE | 1.516408 | FALSE | Photoreceptor          |
| ATGCCTCC db/m1 | db/m | 5377 | 0.022455 | FALSE | 1.188625 | FALSE | Photoreceptor          |
| ATGCCTCC db/m1 | db/m | 1828 | 0.015287 | FALSE | 1.525309 | FALSE | Endothelia Capillary E |
| ATGCCTCC db/m1 | db/m | 2769 | 0.026796 | FALSE | 0.751673 | FALSE | Photoreceptor          |
| ATGCCTCC db/m1 | db/m | 751  | 0.023682 | FALSE | 1.649956 | FALSE | Photoreceptor          |
| ATGCCTCC db/m1 | db/m | 477  | 0.040404 | FALSE | 1.682416 | FALSE | Pericyte               |
| ATGCCTCT db/m1 | db/m | 2102 | 0.052669 | FALSE | 1.187197 | FALSE | Photoreceptor          |
| ATGCGAT/ db/m1 | db/m | 1099 | 0.411992 | TRUE  | 17.19167 | TRUE  |                        |
| ATGCGAT/ db/m1 | db/m | 8169 | 0.019455 | FALSE | 0.780338 | FALSE | Photoreceptor          |
| ATGCGAT( db/m1 | db/m | 6042 | 0.038251 | FALSE | 1.028486 | FALSE | Photoreceptor          |
| ATGCGAT( db/m1 | db/m | 3014 | 0.010846 | FALSE | 1.600938 | FALSE | Photoreceptor          |
| ATGCGAT( db/m1 | db/m | 3545 | 0.016488 | FALSE | 1.007325 | FALSE | Endothelia Venous EC   |
| ATGCGAT( db/m1 | db/m | 8494 | 0.023682 | FALSE | 0.831376 | FALSE | Photoreceptor          |
| ATGCGAT( db/m1 | db/m | 4999 | 0.024105 | FALSE | 0.871602 | FALSE | Photoreceptor          |
| ATGGAGG. db/m1 | db/m | 726  | 0.011805 | FALSE | 3.174285 | FALSE | Pericyte               |
| ATGGAGG. db/m1 | db/m | 2461 | 0.038251 | FALSE | 1.138906 | FALSE | Photoreceptor          |
| ATGGAGG. db/m1 | db/m | 7970 | 0.024105 | FALSE | 0.65326  | FALSE | Photoreceptor          |
| ATGGAGG. db/m1 | db/m | 2548 | 0.029266 | FALSE | 1.57414  | FALSE | Endothelia Capillary E |
| ATGGAGG. db/m1 | db/m | 2620 | 0.025416 | FALSE | 1.055041 | FALSE | Photoreceptor          |
| ATGGAGG. db/m1 | db/m | 2640 | 0.022455 | FALSE | 1.477081 | FALSE | Endothelia Capillary E |
| ATGGAGG. db/m1 | db/m | 1781 | 0.015879 | FALSE | 1.218223 | FALSE | Neuron                 |
| ATGGATC/ db/m1 | db/m | 5167 | 0.138889 | TRUE  | 4.829297 | FALSE |                        |
| ATGGATC/ db/m1 | db/m | 438  | 0.034954 | FALSE | 2.943825 | FALSE | Muller cell            |
| ATGGATC/ db/m1 | db/m | 1165 | 0.016181 | FALSE | 2.050371 | FALSE | Endothelia Capillary E |
| ATGGGAG. db/m1 | db/m | 1526 | 0.013074 | FALSE | 1.845176 | FALSE | Endothelia Aterial EC  |
| ATGGGAG. db/m1 | db/m | 4968 | 0.159016 | TRUE  | 2.394459 | FALSE |                        |
| ATGGGTT/ db/m1 | db/m | 784  | 0.046906 | FALSE | 4.413568 | FALSE | Muller cell            |
| ATGGGTT/ db/m1 | db/m | 2445 | 0.042704 | FALSE | 0.798439 | FALSE | Photoreceptor          |
| ATGGGTT( db/m1 | db/m | 2129 | 0.008032 | FALSE | 0.958014 | FALSE | Endothelia Capillary E |
| ATGGGTT( db/m1 | db/m | 4413 | 0.063221 | FALSE | 0.983423 | FALSE | Photoreceptor          |
| ATGGGTT( db/m1 | db/m | 2989 | 0.028251 | FALSE | 1.230445 | FALSE | Photoreceptor          |
| ATGGGTT( db/m1 | db/m | 889  | 0.064568 | FALSE | 1.776967 | FALSE | Photoreceptor          |
| ATGGGTT( db/m1 | db/m | 867  | 0.061912 | FALSE | 1.594602 | FALSE | Endothelia Capillary E |
| ATGGGTTI db/m1 | db/m | 4975 | 0.018761 | FALSE | 1.081109 | FALSE | Photoreceptor          |
| ATGGTTG( db/m1 | db/m | 1289 | 0.057037 | FALSE | 1.794559 | FALSE | Photoreceptor          |
| ATGTCCCA db/m1 | db/m | 2139 | 0.071958 | FALSE | 1.865789 | FALSE | Muller cell            |
| ATGTCCCA db/m1 | db/m | 2442 | 0.020908 | FALSE | 1.088587 | FALSE | Endothelia Capillary E |
| ATGTCCCC db/m1 | db/m | 452  | 0.055901 | FALSE | 3.227466 | FALSE | Muller cell            |
| ATGTCCCC db/m1 | db/m | 392  | 0.013876 | FALSE | 3.949365 | FALSE | Photoreceptor          |
| ATGTCCCT db/m1 | db/m | 1263 | 0.061912 | FALSE | 2.061489 | FALSE | Photoreceptor          |
| ATGTCCCT db/m1 | db/m | 793  | 0.058205 | FALSE | 1.154465 | FALSE | Photoreceptor          |
| ATGTCCCT db/m1 | db/m | 1329 | 0.084562 | FALSE | 13.29809 | TRUE  |                        |
| ATGTCTTA db/m1 | db/m | 2512 | 0.028754 | FALSE | 1.220593 | FALSE | Photoreceptor          |
| ATGTCTTG db/m1 | db/m | 3759 | 0.046906 | FALSE | 1.29336  | FALSE | Neuron                 |



|                |      |      |          |       |          |       |                        |
|----------------|------|------|----------|-------|----------|-------|------------------------|
| ATGTCTTT db/m1 | db/m | 1032 | 0.084562 | FALSE | 1.884161 | FALSE | Photoreceptor          |
| ATGTCTTT db/m1 | db/m | 589  | 0.048732 | FALSE | 44.80874 | TRUE  |                        |
| ATTACCTA db/m1 | db/m | 1291 | 0.014429 | FALSE | 1.574445 | FALSE | Endothelia Capillary E |
| ATTACCTA db/m1 | db/m | 4269 | 0.019106 | FALSE | 1.244246 | FALSE | Photoreceptor          |
| ATTACCTA db/m1 | db/m | 2531 | 0.010384 | FALSE | 1.2007   | FALSE | Endothelia Venous EC   |
| ATTACCTC db/m1 | db/m | 4946 | 0.051646 | FALSE | 1.107076 | FALSE | Neuron                 |
| ATTACCTG db/m1 | db/m | 998  | 0.024534 | FALSE | 2.008152 | FALSE | Endothelia Capillary E |
| ATTACCTT db/m1 | db/m | 777  | 0.065957 | FALSE | 3.521462 | FALSE | Muller cell            |
| ATTACCTT db/m1 | db/m | 736  | 0.031973 | FALSE | 1.476122 | FALSE | Photoreceptor          |
| ATTACTCA db/m1 | db/m | 2054 | 0.01981  | FALSE | 1.68647  | FALSE | Endothelia Capillary E |
| ATTACTCC db/m1 | db/m | 4611 | 0.028754 | FALSE | 0.889706 | FALSE | Endothelia Venous EC   |
| ATTACTCC db/m1 | db/m | 2336 | 0.076994 | FALSE | 1.384826 | FALSE | Photoreceptor          |
| ATTACTCC db/m1 | db/m | 568  | 0.030859 | FALSE | 3.698782 | FALSE | Muller cell            |
| ATTACTCG db/m1 | db/m | 1148 | 0.045165 | FALSE | 0.682122 | FALSE | Photoreceptor          |
| ATTATCCC db/m1 | db/m | 2273 | 0.039671 | FALSE | 0.918501 | FALSE | Photoreceptor          |
| ATTATCCC db/m1 | db/m | 932  | 0.019106 | FALSE | 0.737735 | FALSE | Photoreceptor          |
| ATTATCCC db/m1 | db/m | 2537 | 0.038953 | FALSE | 1.397235 | FALSE | Endothelia Capillary E |
| ATTATCCG db/m1 | db/m | 7418 | 0.039671 | FALSE | 0.798829 | FALSE | Photoreceptor          |
| ATTATCCT db/m1 | db/m | 827  | 0.019455 | FALSE | 0.495666 | FALSE | Photoreceptor          |
| ATTATCCT db/m1 | db/m | 824  | 0.015581 | FALSE | 0.606632 | FALSE | Photoreceptor          |
| ATTCACTA db/m1 | db/m | 840  | 0.025868 | FALSE | 0.79986  | FALSE | Photoreceptor          |
| ATTCACTA db/m1 | db/m | 1090 | 0.046906 | FALSE | 1.758426 | FALSE | Photoreceptor          |
| ATTCACTA db/m1 | db/m | 1312 | 0.055901 | FALSE | 2.015148 | FALSE | Photoreceptor          |
| ATTCACTC db/m1 | db/m | 3626 | 0.046906 | FALSE | 1.121456 | FALSE | Photoreceptor          |
| ATTCACTC db/m1 | db/m | 2567 | 0.011319 | FALSE | 1.630652 | FALSE | Photoreceptor          |
| ATTCACTC db/m1 | db/m | 427  | 0.029787 | FALSE | 3.853957 | FALSE | Muller cell            |
| ATTCACTG db/m1 | db/m | 3704 | 0.037564 | FALSE | 1.054847 | FALSE | Photoreceptor          |
| ATTCACTG db/m1 | db/m | 642  | 0.05065  | FALSE | 4.113002 | FALSE | Muller cell            |
| ATTCACTT db/m1 | db/m | 3069 | 0.012557 | FALSE | 1.047035 | FALSE | Endothelia Venous EC   |
| ATTCAGGC db/m1 | db/m | 989  | 0.023682 | FALSE | 1.392332 | FALSE | Photoreceptor          |
| ATTCAGGC db/m1 | db/m | 3432 | 0.023682 | FALSE | 1.073868 | FALSE | Endothelia Venous EC   |
| ATTCAGGT db/m1 | db/m | 1585 | 0.035586 | FALSE | 1.277774 | FALSE | Photoreceptor          |
| ATTCAGGT db/m1 | db/m | 573  | 0.025868 | FALSE | 1.19446  | FALSE | Photoreceptor          |
| ATTCATCA db/m1 | db/m | 798  | 0.095727 | FALSE | 0.955147 | FALSE | Photoreceptor          |
| ATTCATCA db/m1 | db/m | 3072 | 0.046906 | FALSE | 1.330976 | FALSE | Photoreceptor          |
| ATTCATCA db/m1 | db/m | 403  | 0.047807 | FALSE | 1.037373 | FALSE | Photoreceptor          |
| ATTCATCC db/m1 | db/m | 1190 | 0.021286 | FALSE | 0.892755 | FALSE | Photoreceptor          |
| ATTCATCC db/m1 | db/m | 2413 | 0.008234 | FALSE | 1.154553 | FALSE | Endothelia Capillary E |
| ATTCATCG db/m1 | db/m | 2829 | 0.071958 | FALSE | 1.140898 | FALSE | Photoreceptor          |
| ATTCATCG db/m1 | db/m | 515  | 0.095727 | FALSE | 2.952291 | FALSE | Endothelia Capillary E |
| ATTCATCG db/m1 | db/m | 4797 | 0.014151 | FALSE | 1.093186 | FALSE | Photoreceptor          |
| ATTCATCT db/m1 | db/m | 1669 | 0.059406 | FALSE | 2.376829 | FALSE | Photoreceptor          |
| ATTCATA db/m1  | db/m | 160  | 0.109795 | TRUE  | 4.535148 | FALSE |                        |
| ATTCATA db/m1  | db/m | 553  | 0.024534 | FALSE | 2.0926   | FALSE | Endothelia Capillary E |
| ATTCATC db/m1  | db/m | 4749 | 0.023266 | FALSE | 0.966902 | FALSE | Photoreceptor          |
| ATTCATT db/m1  | db/m | 6849 | 0.009712 | FALSE | 1.03112  | FALSE | Photoreceptor          |
| ATTCATT db/m1  | db/m | 2697 | 0.061912 | FALSE | 1.198095 | FALSE | Photoreceptor          |

|          |       |      |      |          |       |          |       |                        |
|----------|-------|------|------|----------|-------|----------|-------|------------------------|
| ATTCCATT | db/m1 | db/m | 532  | 0.031973 | FALSE | 2.526272 | FALSE | Microglia              |
| ATCCCCGA | db/m1 | db/m | 1093 | 0.047807 | FALSE | 1.367185 | FALSE | Photoreceptor          |
| ATCCCCGC | db/m1 | db/m | 1351 | 0.126437 | TRUE  | 7.710065 | TRUE  |                        |
| ATCCCCGG | db/m1 | db/m | 3311 | 0.028251 | FALSE | 1.480213 | FALSE | Photoreceptor          |
| ATCCCCGT | db/m1 | db/m | 1496 | 0.024534 | FALSE | 1.003991 | FALSE | Photoreceptor          |
| ATCCCCGT | db/m1 | db/m | 955  | 0.043505 | FALSE | 1.846987 | FALSE | Photoreceptor          |
| ATTCCTAA | db/m1 | db/m | 852  | 0.018761 | FALSE | 0.88051  | FALSE | Photoreceptor          |
| ATTCCTAA | db/m1 | db/m | 1028 | 0.027758 | FALSE | 0.95184  | FALSE | Endothelia Venous EC   |
| ATTCCTAG | db/m1 | db/m | 274  | 0.015879 | FALSE | 79.77465 | TRUE  |                        |
| ATTCCTAG | db/m1 | db/m | 3189 | 0.150727 | TRUE  | 4.082218 | FALSE |                        |
| ATTCCTAT | db/m1 | db/m | 7085 | 0.018761 | FALSE | 0.749654 | FALSE | Photoreceptor          |
| ATTCGTTA | db/m1 | db/m | 6818 | 0.008032 | FALSE | 0.966717 | FALSE | Photoreceptor          |
| ATTCGTTG | db/m1 | db/m | 745  | 0.013605 | FALSE | 1.896498 | FALSE | Endothelia Capillary E |
| ATTCGTTT | db/m1 | db/m | 1026 | 0.030859 | FALSE | 1.617405 | FALSE | Photoreceptor          |
| ATTCGTTT | db/m1 | db/m | 711  | 0.067388 | FALSE | 2.069862 | FALSE | Neuron                 |
| ATTCTACA | db/m1 | db/m | 2394 | 0.041154 | FALSE | 0.969532 | FALSE | Endothelia Capillary E |
| ATTCTACA | db/m1 | db/m | 7146 | 0.015581 | FALSE | 0.848644 | FALSE | Photoreceptor          |
| ATTCTACC | db/m1 | db/m | 7551 | 0.012303 | FALSE | 0.958087 | FALSE | Photoreceptor          |
| ATTCTACG | db/m1 | db/m | 2108 | 0.063221 | FALSE | 1.105798 | FALSE | Photoreceptor          |
| ATTCTACG | db/m1 | db/m | 1457 | 0.014151 | FALSE | 1.215215 | FALSE | Endothelia Capillary E |
| ATTCTACT | db/m1 | db/m | 5203 | 0.041154 | FALSE | 1.10401  | FALSE | Photoreceptor          |
| ATTCTACT | db/m1 | db/m | 7053 | 0.019106 | FALSE | 0.89276  | FALSE | Photoreceptor          |
| ATTCTTGA | db/m1 | db/m | 771  | 0.059406 | FALSE | 2.109996 | FALSE | Endothelia Capillary E |
| ATTCTTGA | db/m1 | db/m | 2428 | 0.093319 | FALSE | 1.399378 | FALSE | Photoreceptor          |
| ATTCTTGG | db/m1 | db/m | 1269 | 0.015879 | FALSE | 2.54254  | FALSE | Endothelia Capillary E |
| ATTGGGT/ | db/m1 | db/m | 410  | 0.053718 | FALSE | 5.893186 | TRUE  |                        |
| ATTGGGT/ | db/m1 | db/m | 5689 | 0.011561 | FALSE | 1.02461  | FALSE | Photoreceptor          |
| ATTGGGT( | db/m1 | db/m | 334  | 0.24     | TRUE  | 17.90476 | TRUE  |                        |
| ATTGGGT( | db/m1 | db/m | 785  | 0.019455 | FALSE | 1.097007 | FALSE | Photoreceptor          |
| ATTGGGT( | db/m1 | db/m | 2472 | 0.065957 | FALSE | 1.539143 | FALSE | Photoreceptor          |
| ATTGGGT( | db/m1 | db/m | 1072 | 0.075259 | FALSE | 33.46127 | TRUE  |                        |
| ATTGGGT( | db/m1 | db/m | 404  | 0.059406 | FALSE | 1.845684 | FALSE | Photoreceptor          |
| ATTGGGT( | db/m1 | db/m | 5913 | 0.029787 | FALSE | 0.855899 | FALSE | Photoreceptor          |
| ATTGGGT( | db/m1 | db/m | 3312 | 0.034954 | FALSE | 1.40602  | FALSE | Endothelia Venous EC   |
| ATTGGGTI | db/m1 | db/m | 1635 | 0.065957 | FALSE | 3.119885 | FALSE | Muller cell            |
| ATTGGGTI | db/m1 | db/m | 1064 | 0.022857 | FALSE | 0.729963 | FALSE | Photoreceptor          |
| ATTGTTCA | db/m1 | db/m | 1648 | 0.018761 | FALSE | 1.451354 | FALSE | Endothelia Capillary E |
| ATTGTTCA | db/m1 | db/m | 6781 | 0.010846 | FALSE | 0.931629 | FALSE | Photoreceptor          |
| ATTGTTCC | db/m1 | db/m | 853  | 0.021286 | FALSE | 2.439102 | FALSE | Neuron                 |
| ATTGTTCC | db/m1 | db/m | 2924 | 0.005095 | FALSE | 1.000064 | FALSE | Neuron                 |
| ATTGTTCC | db/m1 | db/m | 1071 | 0.033726 | FALSE | 0.635596 | FALSE | Photoreceptor          |
| ATTGTTCG | db/m1 | db/m | 2653 | 0.036232 | FALSE | 0.714647 | FALSE | Photoreceptor          |
| ATTGTTCT | db/m1 | db/m | 2708 | 0.022059 | FALSE | 1.015157 | FALSE | Endothelia Capillary E |
| ATTGTTCT | db/m1 | db/m | 1223 | 0.082569 | FALSE | 1.222041 | FALSE | Photoreceptor          |
| ATTTACCA | db/m1 | db/m | 623  | 0.143501 | TRUE  | 19.69286 | TRUE  |                        |
| ATTTACCC | db/m1 | db/m | 819  | 0.059406 | FALSE | 0.929482 | FALSE | Photoreceptor          |
| ATTTACCT | db/m1 | db/m | 406  | 0.032546 | FALSE | 2.369789 | FALSE | Microglia              |

|                |      |      |          |       |          |       |                        |
|----------------|------|------|----------|-------|----------|-------|------------------------|
| ATTTACC db/m1  | db/m | 3868 | 0.011081 | FALSE | 1.344868 | FALSE | Photoreceptor          |
| ATTTACC db/m1  | db/m | 4207 | 0.041154 | FALSE | 1.156893 | FALSE | Photoreceptor          |
| ATTTACG db/m1  | db/m | 2593 | 0.010614 | FALSE | 2.064392 | FALSE | Photoreceptor          |
| ATTTACT db/m1  | db/m | 8682 | 0.027273 | FALSE | 0.760646 | FALSE | Photoreceptor          |
| ATTTCTGA db/m1 | db/m | 1830 | 0.012303 | FALSE | 0.761132 | FALSE | Endothelia Capillary E |
| ATTTCTGA db/m1 | db/m | 1426 | 0.017114 | FALSE | 1.392469 | FALSE | Endothelia Capillary E |
| ATTTCTGA db/m1 | db/m | 2986 | 0.022455 | FALSE | 1.198008 | FALSE | Endothelia Venous EC   |
| ATTTCTGG db/m1 | db/m | 5275 | 0.035586 | FALSE | 0.933309 | FALSE | Photoreceptor          |
| ATTTCTGT db/m1 | db/m | 720  | 0.04192  | FALSE | 3.896412 | FALSE | Muller cell            |
| CAAAGAA db/m1  | db/m | 830  | 0.034334 | FALSE | 1.34313  | FALSE | Photoreceptor          |
| CAAAGAA db/m1  | db/m | 3328 | 0.044326 | FALSE | 1.698542 | FALSE | Photoreceptor          |
| CAAAGAA db/m1  | db/m | 601  | 0.126437 | TRUE  | 13.44445 | TRUE  |                        |
| CAAAGAA db/m1  | db/m | 5485 | 0.058205 | FALSE | 1.135113 | FALSE | Photoreceptor          |
| CAAAGAA db/m1  | db/m | 1337 | 0.018761 | FALSE | 0.968982 | FALSE | Photoreceptor          |
| CAAAGAA db/m1  | db/m | 992  | 0.023266 | FALSE | 0.807492 | FALSE | Photoreceptor          |
| CAAAGAA db/m1  | db/m | 583  | 0.03313  | FALSE | 0.699918 | FALSE | Photoreceptor          |
| CAAAGAA db/m1  | db/m | 4692 | 0.023266 | FALSE | 0.932983 | FALSE | Photoreceptor          |
| CAACAAC db/m1  | db/m | 717  | 0.218615 | TRUE  | 23.46851 | TRUE  |                        |
| CAACAAC db/m1  | db/m | 861  | 0.009933 | FALSE | 2.251046 | FALSE | Endothelia Capillary E |
| CAACAAC db/m1  | db/m | 3432 | 0.034954 | FALSE | 0.996616 | FALSE | Endothelia Venous EC   |
| CAACAAC db/m1  | db/m | 555  | 0.03313  | FALSE | 4.730886 | FALSE | Photoreceptor          |
| CAACAAC db/m1  | db/m | 3927 | 0.04192  | FALSE | 0.923875 | FALSE | Photoreceptor          |
| CAACAAC db/m1  | db/m | 1142 | 0.025868 | FALSE | 2.082907 | FALSE | Photoreceptor          |
| CAACAAC db/m1  | db/m | 5927 | 0.082569 | FALSE | 1.216353 | FALSE | Neuron                 |
| CAACAAC db/m1  | db/m | 2735 | 0.088776 | FALSE | 1.499501 | FALSE | Endothelia Venous EC   |
| CAACAGT db/m1  | db/m | 5965 | 0.030318 | FALSE | 1.072452 | FALSE | Photoreceptor          |
| CAACAGT db/m1  | db/m | 2532 | 0.041154 | FALSE | 1.591115 | FALSE | Photoreceptor          |
| CAACAGT db/m1  | db/m | 3480 | 0.020536 | FALSE | 1.193251 | FALSE | Endothelia Capillary E |
| CAACAGT db/m1  | db/m | 608  | 0.24     | TRUE  | 2.731592 | FALSE |                        |
| CAACAGT db/m1  | db/m | 9489 | 0.04192  | FALSE | 0.597307 | FALSE | Photoreceptor          |
| CAACAGT db/m1  | db/m | 3710 | 0.020171 | FALSE | 1.231921 | FALSE | Photoreceptor          |
| CAACCAA db/m1  | db/m | 707  | 0.023266 | FALSE | 0.820647 | FALSE | Photoreceptor          |
| CAACCAA db/m1  | db/m | 453  | 0.015581 | FALSE | 2.317211 | FALSE | Photoreceptor          |
| CAACCAA db/m1  | db/m | 2576 | 0.068864 | FALSE | 1.173311 | FALSE | Photoreceptor          |
| CAACCAAC db/m1 | db/m | 433  | 0.041154 | FALSE | 1.188112 | FALSE | Photoreceptor          |
| CAACCAAC db/m1 | db/m | 909  | 0.045165 | FALSE | 1.89869  | FALSE | Photoreceptor          |
| CAACCAAC db/m1 | db/m | 2352 | 0.042704 | FALSE | 1.38263  | FALSE | Photoreceptor          |
| CAACCAAC db/m1 | db/m | 8078 | 0.028754 | FALSE | 0.705071 | FALSE | Photoreceptor          |
| CAACCAAT db/m1 | db/m | 760  | 0.075259 | FALSE | 1.599846 | FALSE | Photoreceptor          |
| CAACCAAT db/m1 | db/m | 2782 | 0.024534 | FALSE | 1.392491 | FALSE | Endothelia Capillary E |
| CAACCTCA db/m1 | db/m | 1342 | 0.020908 | FALSE | 1.952608 | FALSE | Endothelia Capillary E |
| CAACCTCC db/m1 | db/m | 617  | 0.103567 | TRUE  | 20.78431 | TRUE  |                        |
| CAACCTCG db/m1 | db/m | 811  | 0.028754 | FALSE | 2.146294 | FALSE | Muller cell            |
| CAACCTCT db/m1 | db/m | 3027 | 0.033726 | FALSE | 2.394905 | FALSE | Neuron                 |
| CAACGAT db/m1  | db/m | 524  | 0.028754 | FALSE | 1.258527 | FALSE | Photoreceptor          |
| CAACGAT db/m1  | db/m | 3570 | 0.031973 | FALSE | 1.275008 | FALSE | Endothelia Venous EC   |
| CAACGATC db/m1 | db/m | 845  | 0.023266 | FALSE | 1.069705 | FALSE | Photoreceptor          |

|                |      |      |          |       |          |       |                        |
|----------------|------|------|----------|-------|----------|-------|------------------------|
| CAACGATC db/m1 | db/m | 4196 | 0.033726 | FALSE | 1.224796 | FALSE | Photoreceptor          |
| CAACGATC db/m1 | db/m | 442  | 0.027758 | FALSE | 62.39035 | TRUE  |                        |
| CAACGATT db/m1 | db/m | 5845 | 0.025416 | FALSE | 1.060274 | FALSE | Photoreceptor          |
| CAACGGC db/m1  | db/m | 1590 | 0.024105 | FALSE | 1.713791 | FALSE | Endothelia Capillary E |
| CAACGGC db/m1  | db/m | 2298 | 0.025416 | FALSE | 1.539627 | FALSE | Endothelia Capillary E |
| CAACGGC db/m1  | db/m | 8283 | 0.022455 | FALSE | 0.77172  | FALSE | Photoreceptor          |
| CAACGGC db/m1  | db/m | 423  | 0.040404 | FALSE | 2.949585 | FALSE | Photoreceptor          |
| CAACGGC db/m1  | db/m | 1325 | 0.019106 | FALSE | 1.544826 | FALSE | Endothelia Capillary E |
| CAACGGC db/m1  | db/m | 855  | 0.028754 | FALSE | 0.935025 | FALSE | Photoreceptor          |
| CAAGACT db/m1  | db/m | 4209 | 0.038953 | FALSE | 1.071289 | FALSE | Photoreceptor          |
| CAAGACT db/m1  | db/m | 3056 | 0.022455 | FALSE | 1.143869 | FALSE | Endothelia Capillary E |
| CAAGACT db/m1  | db/m | 5472 | 0.019455 | FALSE | 1.121209 | FALSE | Photoreceptor          |
| CAAGACT db/m1  | db/m | 5095 | 0.045165 | FALSE | 1.229058 | FALSE | Neuron                 |
| CAAGACT db/m1  | db/m | 491  | 0.016488 | FALSE | 1.859206 | FALSE | Photoreceptor          |
| CAAGAGG db/m1  | db/m | 1612 | 0.073582 | FALSE | 1.16791  | FALSE | Photoreceptor          |
| CAAGAGG db/m1  | db/m | 1805 | 0.071958 | FALSE | 1.770669 | FALSE | Photoreceptor          |
| CAAGAGG db/m1  | db/m | 964  | 0.046906 | FALSE | 2.395336 | FALSE | Photoreceptor          |
| CAAGCTA db/m1  | db/m | 2559 | 0.027273 | FALSE | 1.445564 | FALSE | Endothelia Venous EC   |
| CAAGCTA db/m1  | db/m | 398  | 0.209157 | TRUE  | 13.29787 | TRUE  |                        |
| CAAGCTA db/m1  | db/m | 1065 | 0.093319 | FALSE | 2.421702 | FALSE | Photoreceptor          |
| CAAGCTA db/m1  | db/m | 610  | 0.053718 | FALSE | 19.53353 | TRUE  |                        |
| CAAGCTA db/m1  | db/m | 709  | 0.054795 | FALSE | 10.61793 | TRUE  |                        |
| CAAGCTA db/m1  | db/m | 586  | 0.010614 | FALSE | 2.918956 | FALSE | Endothelia Capillary E |
| CAAGCTA db/m1  | db/m | 1056 | 0.033726 | FALSE | 2.294631 | FALSE | Photoreceptor          |
| CAAGCTA db/m1  | db/m | 1366 | 0.060641 | FALSE | 1.161255 | FALSE | Photoreceptor          |
| CAAGCTA db/m1  | db/m | 1726 | 0.078788 | FALSE | 19.35484 | TRUE  |                        |
| CAAGCTA db/m1  | db/m | 691  | 0.059406 | FALSE | 0.962353 | FALSE | Photoreceptor          |
| CAAGGGA db/m1  | db/m | 621  | 0.019106 | FALSE | 2.969643 | FALSE | Muller cell            |
| CAAGGGA db/m1  | db/m | 552  | 0.049679 | FALSE | 3.816162 | FALSE | Muller cell            |
| CAAGGGA db/m1  | db/m | 1635 | 0.063221 | FALSE | 1.522931 | FALSE | Photoreceptor          |
| CAAGGGA db/m1  | db/m | 2924 | 0.093319 | FALSE | 1.998207 | FALSE | Photoreceptor          |
| CAATACG db/m1  | db/m | 7816 | 0.019106 | FALSE | 0.854556 | FALSE | Photoreceptor          |
| CAATACG db/m1  | db/m | 3797 | 0.04192  | FALSE | 1.374654 | FALSE | Endothelia Venous EC   |
| CAATACG db/m1  | db/m | 3673 | 0.034954 | FALSE | 0.960645 | FALSE | Photoreceptor          |
| CAATACG db/m1  | db/m | 1056 | 0.076994 | FALSE | 1.086204 | FALSE | Photoreceptor          |
| CAATACG db/m1  | db/m | 410  | 0.025416 | FALSE | 2.170149 | FALSE | Photoreceptor          |
| CAATACG db/m1  | db/m | 5177 | 0.035586 | FALSE | 1.067824 | FALSE | Neuron                 |
| CAATCGA db/m1  | db/m | 789  | 0.036232 | FALSE | 0.903072 | FALSE | Photoreceptor          |
| CAATCGA db/m1  | db/m | 4180 | 0.036232 | FALSE | 1.244112 | FALSE | Photoreceptor          |
| CAATCGA db/m1  | db/m | 1581 | 0.017114 | FALSE | 1.314206 | FALSE | Endothelia Capillary E |
| CAATCGA db/m1  | db/m | 2905 | 0.065957 | FALSE | 1.160469 | FALSE | Photoreceptor          |
| CAATCGA db/m1  | db/m | 373  | 0.017434 | FALSE | 3.098075 | FALSE | Photoreceptor          |
| CAATCGA db/m1  | db/m | 1043 | 0.053718 | FALSE | 1.376557 | FALSE | Photoreceptor          |
| CAATCGA db/m1  | db/m | 7816 | 0.13452  | TRUE  | 2.270531 | FALSE |                        |
| CAATCGA db/m1  | db/m | 1210 | 0.018422 | FALSE | 0.86827  | FALSE | Photoreceptor          |
| CAATGAC db/m1  | db/m | 1305 | 0.046906 | FALSE | 1.119546 | FALSE | Photoreceptor          |
| CAATGAC db/m1  | db/m | 7318 | 0.15354  | TRUE  | 2.954606 | FALSE |                        |

|                 |      |      |          |       |          |       |                        |
|-----------------|------|------|----------|-------|----------|-------|------------------------|
| CAATGACC db/m1  | db/m | 1009 | 0.053718 | FALSE | 2.068488 | FALSE | Photoreceptor          |
| CAATGACT db/m1  | db/m | 2497 | 0.030318 | FALSE | 1.213765 | FALSE | Photoreceptor          |
| CAATTTTCG db/m1 | db/m | 3141 | 0.031973 | FALSE | 0.668049 | FALSE | Photoreceptor          |
| CAATTTTCG db/m1 | db/m | 1137 | 0.051646 | FALSE | 2.99705  | FALSE | Photoreceptor          |
| CAATTTTCG db/m1 | db/m | 1755 | 0.020536 | FALSE | 1.418662 | FALSE | Endothelia Capillary E |
| CAATTTCT db/m1  | db/m | 2246 | 0.020536 | FALSE | 1.109969 | FALSE | Photoreceptor          |
| CAATTTCT db/m1  | db/m | 1349 | 0.048732 | FALSE | 1.531831 | FALSE | Photoreceptor          |
| CAATTTCT db/m1  | db/m | 528  | 0.047807 | FALSE | 56.20712 | TRUE  |                        |
| CAATTTCT db/m1  | db/m | 487  | 0.018088 | FALSE | 4.679192 | FALSE | Muller cell            |
| CACAACA db/m1   | db/m | 4947 | 0.026796 | FALSE | 0.956782 | FALSE | Endothelia Capillary E |
| CACAACAC db/m1  | db/m | 4755 | 0.018088 | FALSE | 0.645884 | FALSE | Photoreceptor          |
| CACAACAC db/m1  | db/m | 6235 | 0.029266 | FALSE | 0.841542 | FALSE | Photoreceptor          |
| CACAACAC db/m1  | db/m | 1550 | 0.052669 | FALSE | 1.363881 | FALSE | Neuron                 |
| CACAACAC db/m1  | db/m | 6686 | 0.010384 | FALSE | 0.940585 | FALSE | Photoreceptor          |
| CACAACAT db/m1  | db/m | 1783 | 0.026328 | FALSE | 1.370113 | FALSE | Endothelia Capillary E |
| CACAACAT db/m1  | db/m | 686  | 0.084562 | FALSE | 3.987782 | FALSE | Endothelia Capillary E |
| CACAACAT db/m1  | db/m | 3028 | 0.054795 | FALSE | 1.436974 | FALSE | Photoreceptor          |
| CACACAA db/m1   | db/m | 895  | 0.059406 | FALSE | 0.769348 | FALSE | Photoreceptor          |
| CACACAAC db/m1  | db/m | 1137 | 0.024105 | FALSE | 2.112815 | FALSE | Photoreceptor          |
| CACACAAC db/m1  | db/m | 957  | 0.057037 | FALSE | 1.960486 | FALSE | Photoreceptor          |
| CACACAAC db/m1  | db/m | 1041 | 0.061912 | FALSE | 1.967016 | FALSE | Photoreceptor          |
| CACACAAC db/m1  | db/m | 758  | 0.008644 | FALSE | 2.292826 | FALSE | Pericyte               |
| CACACAAC db/m1  | db/m | 1632 | 0.059406 | FALSE | 1.711372 | FALSE | Photoreceptor          |
| CACAGAT db/m1   | db/m | 1092 | 0.053718 | FALSE | 4.025586 | FALSE | Muller cell            |
| CACAGAT db/m1   | db/m | 1467 | 0.022857 | FALSE | 1.221578 | FALSE | Photoreceptor          |
| CACAGAT db/m1   | db/m | 1166 | 0.052669 | FALSE | 1.538738 | FALSE | Photoreceptor          |
| CACAGAT db/m1   | db/m | 408  | 0.027273 | FALSE | 2.424154 | FALSE | Photoreceptor          |
| CACAGATC db/m1  | db/m | 432  | 0.016181 | FALSE | 2.00824  | FALSE | Photoreceptor          |
| CACAGATC db/m1  | db/m | 5162 | 0.588076 | TRUE  | 4.078432 | FALSE |                        |
| CACAGATC db/m1  | db/m | 536  | 0.093319 | FALSE | 0.944979 | FALSE | Photoreceptor          |
| CACAGATC db/m1  | db/m | 4473 | 0.095727 | FALSE | 1.312029 | FALSE | Photoreceptor          |
| CACAGATC db/m1  | db/m | 8177 | 0.041154 | FALSE | 0.89952  | FALSE | Photoreceptor          |
| CACAGATC db/m1  | db/m | 903  | 0.059406 | FALSE | 0.773997 | FALSE | Photoreceptor          |
| CACAGATT db/m1  | db/m | 2433 | 0.023682 | FALSE | 1.402514 | FALSE | Neuron                 |
| CACAGGC db/m1   | db/m | 1917 | 0.023682 | FALSE | 1.084367 | FALSE | Photoreceptor          |
| CACAGGC db/m1   | db/m | 5092 | 0.061912 | FALSE | 1.158791 | FALSE | Photoreceptor          |
| CACAGGC db/m1   | db/m | 4144 | 0.042704 | FALSE | 1.191423 | FALSE | Photoreceptor          |
| CACAGGC db/m1   | db/m | 1758 | 0.039671 | FALSE | 2.679262 | FALSE | Muller cell            |
| CACAGGC db/m1   | db/m | 1928 | 0.016181 | FALSE | 1.526413 | FALSE | Endothelia Capillary E |
| CACAGGC db/m1   | db/m | 1173 | 0.036891 | FALSE | 0.915119 | FALSE | Photoreceptor          |
| CACATGA db/m1   | db/m | 2190 | 0.067388 | FALSE | 1.347675 | FALSE | Photoreceptor          |
| CACATGA db/m1   | db/m | 2724 | 0.048732 | FALSE | 1.684967 | FALSE | Photoreceptor          |
| CACATGA db/m1   | db/m | 3140 | 0.076994 | FALSE | 1.239531 | FALSE | Photoreceptor          |
| CACATGAC db/m1  | db/m | 4003 | 0.042704 | FALSE | 0.868989 | FALSE | Photoreceptor          |
| CACATGAC db/m1  | db/m | 1967 | 0.046025 | FALSE | 1.113878 | FALSE | Photoreceptor          |
| CACATGAC db/m1  | db/m | 6473 | 0.028251 | FALSE | 1.013338 | FALSE | Photoreceptor          |
| CACATGAT db/m1  | db/m | 547  | 0.020908 | FALSE | 0.631942 | FALSE | Photoreceptor          |

|                |      |      |          |       |          |       |                        |
|----------------|------|------|----------|-------|----------|-------|------------------------|
| CACCAAA# db/m1 | db/m | 2906 | 0.007249 | FALSE | 0.873733 | FALSE | Neuron                 |
| CACCAAA# db/m1 | db/m | 563  | 0.076994 | FALSE | 2.740292 | FALSE | Photoreceptor          |
| CACCAAAC db/m1 | db/m | 305  | 0.080645 | FALSE | 4.870759 | FALSE | Muller cell            |
| CACCAAAC db/m1 | db/m | 3788 | 0.028754 | FALSE | 1.123661 | FALSE | Endothelia Venous EC   |
| CACCAAAT db/m1 | db/m | 3042 | 0.025868 | FALSE | 1.17618  | FALSE | Endothelia Venous EC   |
| CACCAAAT db/m1 | db/m | 704  | 0.022857 | FALSE | 2.306811 | FALSE | Pericyte               |
| CACCGTTA db/m1 | db/m | 990  | 0.041154 | FALSE | 2.066371 | FALSE | Photoreceptor          |
| CACCGTTA db/m1 | db/m | 3984 | 0.146004 | TRUE  | 4.588304 | FALSE |                        |
| CACCGTTA db/m1 | db/m | 2545 | 0.010384 | FALSE | 1.229213 | FALSE | Endothelia Venous EC   |
| CACCGTTC db/m1 | db/m | 1596 | 0.057037 | FALSE | 1.53143  | FALSE | Endothelia Venous EC   |
| CACCGTTC db/m1 | db/m | 579  | 0.005782 | FALSE | 1.786365 | FALSE | Photoreceptor          |
| CACCGTTC db/m1 | db/m | 2500 | 0.070386 | FALSE | 1.419518 | FALSE | Endothelia Capillary E |
| CACCGTTC db/m1 | db/m | 7260 | 0.012557 | FALSE | 1.055741 | FALSE | Photoreceptor          |
| CACCGTTC db/m1 | db/m | 3429 | 0.016799 | FALSE | 1.137771 | FALSE | Endothelia Venous EC   |
| CACCGTTT db/m1 | db/m | 417  | 0.038251 | FALSE | 4.033274 | FALSE | Muller cell            |
| CACCGTTT db/m1 | db/m | 4919 | 0.045165 | FALSE | 1.329508 | FALSE | Photoreceptor          |
| CACCGTTT db/m1 | db/m | 511  | 0.065957 | FALSE | 3.683091 | FALSE | Pericyte               |
| CACGAAT# db/m1 | db/m | 1269 | 0.046906 | FALSE | 1.52406  | FALSE | Photoreceptor          |
| CACGAAT# db/m1 | db/m | 668  | 0.005782 | FALSE | 2.259147 | FALSE | Endothelia Capillary E |
| CACGAAT# db/m1 | db/m | 962  | 0.019106 | FALSE | 1.137096 | FALSE | Photoreceptor          |
| CACGAAT# db/m1 | db/m | 6142 | 0.010157 | FALSE | 1.01164  | FALSE | Photoreceptor          |
| CACGAAT# db/m1 | db/m | 1288 | 0.053718 | FALSE | 1.89213  | FALSE | Photoreceptor          |
| CACGAATC db/m1 | db/m | 4397 | 0.130374 | TRUE  | 6.167222 | TRUE  |                        |
| CACGAATC db/m1 | db/m | 4801 | 0.033726 | FALSE | 0.842787 | FALSE | Endothelia Venous EC   |
| CACGAATC db/m1 | db/m | 5992 | 0.100845 | TRUE  | 1.168322 | FALSE |                        |
| CACGAATC db/m1 | db/m | 667  | 0.015287 | FALSE | 1.910803 | FALSE | Endothelia Capillary E |
| CACGAATT db/m1 | db/m | 489  | 0.029266 | FALSE | 1.117658 | FALSE | Photoreceptor          |
| CACGGGT# db/m1 | db/m | 5198 | 0.022059 | FALSE | 1.136909 | FALSE | Photoreceptor          |
| CACGGGT# db/m1 | db/m | 1586 | 0.064568 | FALSE | 0.77775  | FALSE | Photoreceptor          |
| CACGGGT( db/m1 | db/m | 1133 | 0.075259 | FALSE | 2.531788 | FALSE | Endothelia Capillary E |
| CACGGGT( db/m1 | db/m | 2950 | 0.036232 | FALSE | 1.368823 | FALSE | Photoreceptor          |
| CACGGGT  db/m1 | db/m | 2260 | 0.009933 | FALSE | 1.190455 | FALSE | Neuron                 |
| CACGTGG# db/m1 | db/m | 490  | 0.016181 | FALSE | 4.877122 | FALSE | Muller cell            |
| CACGTGG( db/m1 | db/m | 512  | 0.017114 | FALSE | 1.603574 | FALSE | Photoreceptor          |
| CACGTGG( db/m1 | db/m | 1267 | 0.014997 | FALSE | 1.133214 | FALSE | Photoreceptor          |
| CACGTGG( db/m1 | db/m | 743  | 0.060641 | FALSE | 3.852939 | FALSE | Muller cell            |
| CACGTGG( db/m1 | db/m | 6787 | 0.016181 | FALSE | 0.962663 | FALSE | Photoreceptor          |
| CACGTGG( db/m1 | db/m | 1402 | 0.100845 | TRUE  | 16.14458 | TRUE  |                        |
| CACGTGG  db/m1 | db/m | 2428 | 0.057037 | FALSE | 1.84338  | FALSE | Photoreceptor          |
| CACGTGG  db/m1 | db/m | 1463 | 0.063221 | FALSE | 1.138955 | FALSE | Photoreceptor          |
| CACGTGG  db/m1 | db/m | 1211 | 0.024534 | FALSE | 3.091146 | FALSE | Muller cell            |
| CACGTTCA db/m1 | db/m | 1218 | 0.032546 | FALSE | 1.513835 | FALSE | Photoreceptor          |
| CACGTTCC db/m1 | db/m | 5997 | 0.018422 | FALSE | 0.679163 | FALSE | Photoreceptor          |
| CACGTTCC db/m1 | db/m | 901  | 0.014151 | FALSE | 1.572965 | FALSE | Photoreceptor          |
| CACGTTCC db/m1 | db/m | 3318 | 0.017758 | FALSE | 1.156836 | FALSE | Photoreceptor          |
| CACGTTCC db/m1 | db/m | 2975 | 0.010846 | FALSE | 1.365592 | FALSE | Photoreceptor          |
| CACGTTCC db/m1 | db/m | 3151 | 0.010157 | FALSE | 1.688195 | FALSE | Photoreceptor          |

|                |      |      |          |       |          |       |                        |
|----------------|------|------|----------|-------|----------|-------|------------------------|
| CACGTTCC db/m1 | db/m | 482  | 0.054795 | FALSE | 3.395136 | FALSE | Microglia              |
| CACGTTCC db/m1 | db/m | 1020 | 0.091004 | FALSE | 26.73116 | TRUE  |                        |
| CACGTTCT db/m1 | db/m | 1365 | 0.030318 | FALSE | 4.478414 | FALSE | Muller cell            |
| CACTAAGC db/m1 | db/m | 358  | 0.588076 | TRUE  | 12.82051 | TRUE  |                        |
| CACTAAGC db/m1 | db/m | 1276 | 0.061912 | FALSE | 2.616611 | FALSE | Photoreceptor          |
| CACTAAGT db/m1 | db/m | 7378 | 0.013338 | FALSE | 1.189758 | FALSE | Photoreceptor          |
| CACTAAGT db/m1 | db/m | 464  | 0.020536 | FALSE | 2.294215 | FALSE | Photoreceptor          |
| CACTGAA/ db/m1 | db/m | 4266 | 0.024105 | FALSE | 1.036982 | FALSE | Photoreceptor          |
| CACTGAA/ db/m1 | db/m | 1262 | 0.082569 | FALSE | 1.880238 | FALSE | Pericyte               |
| CACTGAA/ db/m1 | db/m | 2276 | 0.054795 | FALSE | 1.785648 | FALSE | Photoreceptor          |
| CACTGAA/ db/m1 | db/m | 444  | 0.034334 | FALSE | 0.637736 | FALSE | Photoreceptor          |
| CACTGAAC db/m1 | db/m | 3039 | 0.023682 | FALSE | 1.473889 | FALSE | Endothelia Venous EC   |
| CACTGAAC db/m1 | db/m | 2093 | 0.019455 | FALSE | 1.627514 | FALSE | Endothelia Aterial EC  |
| CACTGAAC db/m1 | db/m | 1108 | 0.04192  | FALSE | 0.927134 | FALSE | Photoreceptor          |
| CACTGAAC db/m1 | db/m | 809  | 0.126198 | TRUE  | 1.186131 | FALSE |                        |
| CACTGAAC db/m1 | db/m | 2973 | 0.045165 | FALSE | 1.976497 | FALSE | Endothelia Capillary E |
| CACTGAAT db/m1 | db/m | 3198 | 0.028251 | FALSE | 1.535076 | FALSE | Endothelia Venous EC   |
| CACTGGG/ db/m1 | db/m | 2497 | 0.054795 | FALSE | 1.751284 | FALSE | Photoreceptor          |
| CACTGGG/ db/m1 | db/m | 539  | 0.088776 | FALSE | 29.65587 | TRUE  |                        |
| CACTGGG/ db/m1 | db/m | 515  | 0.043505 | FALSE | 2.25413  | FALSE | Photoreceptor          |
| CACTGGG( db/m1 | db/m | 598  | 0.091004 | FALSE | 3.343866 | FALSE | Neuron                 |
| CACTGGG( db/m1 | db/m | 895  | 0.075259 | FALSE | 0.639223 | FALSE | Photoreceptor          |
| CACTGGG( db/m1 | db/m | 731  | 0.059406 | FALSE | 1.600706 | FALSE | Photoreceptor          |
| CACTGGG( db/m1 | db/m | 380  | 0.037564 | FALSE | 4.232547 | FALSE | Muller cell            |
| CACTGGG( db/m1 | db/m | 2671 | 0.031411 | FALSE | 1.03686  | FALSE | Photoreceptor          |
| CACTGGG( db/m1 | db/m | 2851 | 0.064568 | FALSE | 1.153327 | FALSE | Photoreceptor          |
| CACTGGG( db/m1 | db/m | 1448 | 0.061912 | FALSE | 1.509159 | FALSE | Photoreceptor          |
| CACTGGG( db/m1 | db/m | 8615 | 0.010384 | FALSE | 0.906588 | FALSE | Photoreceptor          |
| CACTGTCA db/m1 | db/m | 5285 | 0.028754 | FALSE | 0.968931 | FALSE | Photoreceptor          |
| CACTGTCC db/m1 | db/m | 5029 | 0.021669 | FALSE | 1.11226  | FALSE | Photoreceptor          |
| CACTGTCC db/m1 | db/m | 6352 | 0.022455 | FALSE | 0.818559 | FALSE | Photoreceptor          |
| CACTGTCC db/m1 | db/m | 8381 | 0.030859 | FALSE | 0.83063  | FALSE | Photoreceptor          |
| CACTGTCC db/m1 | db/m | 7682 | 0.005958 | FALSE | 0.910106 | FALSE | Photoreceptor          |
| CACTGTCC db/m1 | db/m | 4210 | 0.059406 | FALSE | 0.943536 | FALSE | Photoreceptor          |
| CACTGTCC db/m1 | db/m | 1224 | 0.012814 | FALSE | 1.213337 | FALSE | Endothelia Capillary E |
| CACTGTCC db/m1 | db/m | 1650 | 0.033726 | FALSE | 1.797991 | FALSE | Endothelia Capillary E |
| CACTGTCT db/m1 | db/m | 4872 | 0.017758 | FALSE | 0.92242  | FALSE | Endothelia Venous EC   |
| CACTTCGA db/m1 | db/m | 5218 | 0.130374 | TRUE  | 6.13987  | TRUE  |                        |
| CACTTCGC db/m1 | db/m | 2216 | 0.00687  | FALSE | 1.496864 | FALSE | Neuron                 |
| CACTTCGC db/m1 | db/m | 4518 | 0.01981  | FALSE | 0.766355 | FALSE | Endothelia Venous EC   |
| CACTTCGC db/m1 | db/m | 2730 | 0.004275 | FALSE | 1.041149 | FALSE | Neuron                 |
| CACTTCGC db/m1 | db/m | 8721 | 0.015879 | FALSE | 0.808937 | FALSE | Photoreceptor          |
| CACTTCGC db/m1 | db/m | 5805 | 0.040404 | FALSE | 0.83339  | FALSE | Photoreceptor          |
| CACTTCGT db/m1 | db/m | 9453 | 0.012303 | FALSE | 0.707747 | FALSE | Photoreceptor          |
| CACTTCGT db/m1 | db/m | 1184 | 0.032546 | FALSE | 0.989995 | FALSE | Photoreceptor          |
| CACTTCGT db/m1 | db/m | 1886 | 0.034954 | FALSE | 1.296804 | FALSE | Pericyte               |
| CAGAGCC( db/m1 | db/m | 403  | 0.011081 | FALSE | 2.091261 | FALSE | Endothelia Capillary E |

|               |      |      |          |       |          |       |                        |
|---------------|------|------|----------|-------|----------|-------|------------------------|
| CAGAGCC(db/m1 | db/m | 4108 | 0.053718 | FALSE | 1.102853 | FALSE | Endothelia Venous EC   |
| CAGAGCCdb/m1  | db/m | 3575 | 0.043505 | FALSE | 1.125316 | FALSE | Photoreceptor          |
| CAGAGCCdb/m1  | db/m | 778  | 0.008438 | FALSE | 0.953787 | FALSE | Photoreceptor          |
| CAGAGCCdb/m1  | db/m | 971  | 0.051646 | FALSE | 1.900516 | FALSE | Photoreceptor          |
| CAGATACdb/m1  | db/m | 2634 | 0.05065  | FALSE | 1.110475 | FALSE | Photoreceptor          |
| CAGATACCdb/m1 | db/m | 1772 | 0.013338 | FALSE | 1.192487 | FALSE | Endothelia Capillary E |
| CAGATACCdb/m1 | db/m | 4153 | 0.052669 | FALSE | 1.097267 | FALSE | Photoreceptor          |
| CAGATACCdb/m1 | db/m | 4294 | 0.009493 | FALSE | 1.257825 | FALSE | Photoreceptor          |
| CAGATACTdb/m1 | db/m | 1062 | 0.047807 | FALSE | 1.991708 | FALSE | Photoreceptor          |
| CAGATACTdb/m1 | db/m | 914  | 0.046906 | FALSE | 1.306807 | FALSE | Photoreceptor          |
| CAGATCAdb/m1  | db/m | 1004 | 0.017758 | FALSE | 1.942082 | FALSE | Endothelia Capillary E |
| CAGATCACdb/m1 | db/m | 2093 | 0.046906 | FALSE | 1.385131 | FALSE | Photoreceptor          |
| CAGATCACdb/m1 | db/m | 2960 | 0.011561 | FALSE | 1.118626 | FALSE | Endothelia Capillary E |
| CAGATCACdb/m1 | db/m | 526  | 0.046906 | FALSE | 2.929878 | FALSE | Endothelia Capillary E |
| CAGATCATdb/m1 | db/m | 1173 | 0.044326 | FALSE | 2.277165 | FALSE | Photoreceptor          |
| CAGATCATdb/m1 | db/m | 9237 | 0.020536 | FALSE | 0.857891 | FALSE | Photoreceptor          |
| CAGATCATdb/m1 | db/m | 3830 | 0.067388 | FALSE | 1.063488 | FALSE | Neuron                 |
| CAGATTG(db/m1 | db/m | 520  | 0.011805 | FALSE | 0.417603 | FALSE | Photoreceptor          |
| CAGATTG(db/m1 | db/m | 698  | 0.020908 | FALSE | 2.620763 | FALSE | Photoreceptor          |
| CAGATTG(db/m1 | db/m | 3129 | 0.058205 | FALSE | 1.407871 | FALSE | Photoreceptor          |
| CAGATTG(db/m1 | db/m | 1858 | 0.015581 | FALSE | 1.589702 | FALSE | Endothelia Capillary E |
| CAGATTG(db/m1 | db/m | 1123 | 0.033726 | FALSE | 1.857347 | FALSE | Photoreceptor          |
| CAGATTG(db/m1 | db/m | 681  | 0.041154 | FALSE | 4.012174 | FALSE | Muller cell            |
| CAGATTGdb/m1  | db/m | 593  | 0.024534 | FALSE | 1.20446  | FALSE | Photoreceptor          |
| CAGCAATdb/m1  | db/m | 4107 | 0.058205 | FALSE | 1.383066 | FALSE | Photoreceptor          |
| CAGCAATdb/m1  | db/m | 2821 | 0.017434 | FALSE | 1.148281 | FALSE | Photoreceptor          |
| CAGCAATdb/m1  | db/m | 230  | 0.110901 | TRUE  | 3.776379 | FALSE |                        |
| CAGCAATdb/m1  | db/m | 4872 | 0.025416 | FALSE | 0.780339 | FALSE | Photoreceptor          |
| CAGCAATdb/m1  | db/m | 1625 | 0.027758 | FALSE | 1.303175 | FALSE | Photoreceptor          |
| CAGCAATTdb/m1 | db/m | 376  | 0.013876 | FALSE | 1.070079 | FALSE | Photoreceptor          |
| CAGCACGdb/m1  | db/m | 364  | 0.073582 | FALSE | 9.411765 | TRUE  |                        |
| CAGCACG(db/m1 | db/m | 3972 | 0.036232 | FALSE | 1.067175 | FALSE | Photoreceptor          |
| CAGCACG(db/m1 | db/m | 485  | 0.036232 | FALSE | 1.023289 | FALSE | Photoreceptor          |
| CAGCACG(db/m1 | db/m | 8335 | 0.017434 | FALSE | 0.739281 | FALSE | Photoreceptor          |
| CAGCACG(db/m1 | db/m | 1197 | 0.038251 | FALSE | 0.421601 | FALSE | Photoreceptor          |
| CAGCACGdb/m1  | db/m | 495  | 0.014711 | FALSE | 2.347374 | FALSE | Endothelia Capillary E |
| CAGCACGdb/m1  | db/m | 569  | 0.073582 | FALSE | 3.807765 | FALSE | Endothelia Capillary E |
| CAGCAGdb/m1   | db/m | 1982 | 0.038251 | FALSE | 1.000705 | FALSE | Photoreceptor          |
| CAGCAGdb/m1   | db/m | 3558 | 0.588076 | TRUE  | 5.451837 | TRUE  |                        |
| CAGCAGdb/m1   | db/m | 492  | 0.076994 | FALSE | 17.78319 | TRUE  |                        |
| CAGCAG(db/m1  | db/m | 5193 | 0.049679 | FALSE | 1.104244 | FALSE | Photoreceptor          |
| CAGCAG(db/m1  | db/m | 4183 | 0.070386 | FALSE | 1.489657 | FALSE | Muller cell            |
| CAGCAG(db/m1  | db/m | 806  | 0.051646 | FALSE | 0.991493 | FALSE | Photoreceptor          |
| CAGCAG(db/m1  | db/m | 4902 | 0.148377 | TRUE  | 1.833466 | FALSE |                        |
| CAGCAGdb/m1   | db/m | 6295 | 0.164835 | TRUE  | 5.447071 | TRUE  |                        |
| CAGCAGdb/m1   | db/m | 856  | 0.045165 | FALSE | 1.040499 | FALSE | Photoreceptor          |
| CAGCCAGdb/m1  | db/m | 1735 | 0.040404 | FALSE | 1.358046 | FALSE | Photoreceptor          |



|               |      |      |          |       |          |       |                        |
|---------------|------|------|----------|-------|----------|-------|------------------------|
| CAGCCAG/db/m1 | db/m | 3985 | 0.040404 | FALSE | 1.128904 | FALSE | Endothelia Capillary E |
| CAGCCAG/db/m1 | db/m | 6795 | 0.017434 | FALSE | 1.036153 | FALSE | Photoreceptor          |
| CAGCCAG/db/m1 | db/m | 2424 | 0.078788 | FALSE | 6.731268 | TRUE  |                        |
| CAGCCAG/db/m1 | db/m | 3879 | 0.052669 | FALSE | 1.140215 | FALSE | Photoreceptor          |
| CAGCCAG/db/m1 | db/m | 6950 | 0.039671 | FALSE | 1.010452 | FALSE | Photoreceptor          |
| CAGCCAG/db/m1 | db/m | 3455 | 0.036232 | FALSE | 0.900589 | FALSE | Neuron                 |
| CAGCGTG/db/m1 | db/m | 3069 | 0.057037 | FALSE | 1.424115 | FALSE | Photoreceptor          |
| CAGCGTG/db/m1 | db/m | 2366 | 0.043505 | FALSE | 1.373262 | FALSE | Endothelia Capillary E |
| CAGCGTG/db/m1 | db/m | 2431 | 0.025416 | FALSE | 1.32092  | FALSE | Endothelia Venous EC   |
| CAGCGTG/db/m1 | db/m | 2214 | 0.116912 | TRUE  | 4.867814 | FALSE |                        |
| CAGCGTG/db/m1 | db/m | 7776 | 0.027273 | FALSE | 1.196726 | FALSE | Photoreceptor          |
| CAGGCCA/db/m1 | db/m | 1374 | 0.031973 | FALSE | 1.291505 | FALSE | Photoreceptor          |
| CAGGCCA/db/m1 | db/m | 4024 | 0.017114 | FALSE | 1.154235 | FALSE | Endothelia Aterial EC  |
| CAGGCCA/db/m1 | db/m | 539  | 0.041154 | FALSE | 9.523809 | TRUE  |                        |
| CAGGCCA/db/m1 | db/m | 1139 | 0.018088 | FALSE | 1.095417 | FALSE | Photoreceptor          |
| CAGGCCA/db/m1 | db/m | 515  | 0.070386 | FALSE | 3.134771 | FALSE | Muller cell            |
| CAGGCCA/db/m1 | db/m | 454  | 0.065957 | FALSE | 4.335324 | FALSE | Muller cell            |
| CAGGGCT/db/m1 | db/m | 501  | 0.064568 | FALSE | 3.232956 | FALSE | Endothelia Capillary E |
| CAGGGCT/db/m1 | db/m | 663  | 0.084562 | FALSE | 9.245483 | TRUE  |                        |
| CAGGGCT/db/m1 | db/m | 657  | 0.036891 | FALSE | 3.227751 | FALSE | Muller cell            |
| CAGGGCT/db/m1 | db/m | 993  | 0.073582 | FALSE | 2.435415 | FALSE | Photoreceptor          |
| CAGGGCT/db/m1 | db/m | 1861 | 0.128582 | TRUE  | 4.170177 | FALSE |                        |
| CAGGGCT/db/m1 | db/m | 7501 | 0.012557 | FALSE | 0.993335 | FALSE | Photoreceptor          |
| CAGGGCT/db/m1 | db/m | 401  | 0.028754 | FALSE | 0.99355  | FALSE | Photoreceptor          |
| CAGGGCT/db/m1 | db/m | 4661 | 0.030859 | FALSE | 0.926094 | FALSE | Photoreceptor          |
| CAGGTAT/db/m1 | db/m | 763  | 0.018422 | FALSE | 0.782012 | FALSE | Photoreceptor          |
| CAGGTAT/db/m1 | db/m | 578  | 0.115723 | TRUE  | 23.74877 | TRUE  |                        |
| CAGGTAT/db/m1 | db/m | 1032 | 0.038251 | FALSE | 1.712195 | FALSE | Photoreceptor          |
| CAGGTAT/db/m1 | db/m | 1306 | 0.060641 | FALSE | 6.525573 | TRUE  |                        |
| CAGGTAT/db/m1 | db/m | 591  | 0.048732 | FALSE | 3.263347 | FALSE | Photoreceptor          |
| CAGGTAT/db/m1 | db/m | 435  | 0.014429 | FALSE | 0.646015 | FALSE | Photoreceptor          |
| CAGGTAT/db/m1 | db/m | 1553 | 0.044326 | FALSE | 0.678998 | FALSE | Photoreceptor          |
| CAGGTAT/db/m1 | db/m | 527  | 0.073582 | FALSE | 0.97723  | FALSE | Photoreceptor          |
| CAGTGCG/db/m1 | db/m | 3253 | 0.016488 | FALSE | 1.107805 | FALSE | Endothelia Venous EC   |
| CAGTGCG/db/m1 | db/m | 1010 | 0.070386 | FALSE | 1.953591 | FALSE | Endothelia Capillary E |
| CAGTGCG/db/m1 | db/m | 3274 | 0.073582 | FALSE | 1.490871 | FALSE | Photoreceptor          |
| CAGTGCG/db/m1 | db/m | 360  | 0.091004 | FALSE | 2.853327 | FALSE | Photoreceptor          |
| CAGTGCG/db/m1 | db/m | 430  | 0.029787 | FALSE | 2.821482 | FALSE | Muller cell            |
| CAGTGCG/db/m1 | db/m | 1207 | 0.052669 | FALSE | 1.091125 | FALSE | Photoreceptor          |
| CAGTGCG/db/m1 | db/m | 6884 | 0.064568 | FALSE | 1.065297 | FALSE | Photoreceptor          |
| CAGTTAG/db/m1 | db/m | 1198 | 0.159016 | TRUE  | 1.684837 | FALSE |                        |
| CAGTTAG/db/m1 | db/m | 6887 | 0.039671 | FALSE | 0.944959 | FALSE | Endothelia Venous EC   |
| CAGTTAG/db/m1 | db/m | 833  | 0.019455 | FALSE | 0.828952 | FALSE | Photoreceptor          |
| CAGTTAG/db/m1 | db/m | 5753 | 0.034954 | FALSE | 1.07463  | FALSE | Photoreceptor          |
| CAGTTAG/db/m1 | db/m | 1251 | 0.023682 | FALSE | 2.139509 | FALSE | Endothelia Capillary E |
| CAGTTAG/db/m1 | db/m | 3796 | 0.153234 | TRUE  | 3.211679 | FALSE |                        |
| CAGTTAG/db/m1 | db/m | 397  | 0.032546 | FALSE | 1.600622 | FALSE | Photoreceptor          |

|                |      |      |          |       |          |       |                        |
|----------------|------|------|----------|-------|----------|-------|------------------------|
| CAGTTAGC db/m1 | db/m | 1532 | 0.015879 | FALSE | 1.924341 | FALSE | Endothelia Capillary E |
| CAGTTCCA db/m1 | db/m | 682  | 0.038953 | FALSE | 3.370614 | FALSE | Neuron                 |
| CAGTTCCC db/m1 | db/m | 3069 | 0.004598 | FALSE | 0.795573 | FALSE | Neuron                 |
| CAGTTCCC db/m1 | db/m | 916  | 0.020908 | FALSE | 0.913708 | FALSE | Photoreceptor          |
| CAGTTCCT db/m1 | db/m | 5130 | 0.052669 | FALSE | 1.157908 | FALSE | Endothelia Venous EC   |
| CAGTTCCT db/m1 | db/m | 4542 | 0.014711 | FALSE | 1.05789  | FALSE | Endothelia Venous EC   |
| CAGTTCCT db/m1 | db/m | 1743 | 0.017758 | FALSE | 1.107572 | FALSE | Endothelia Capillary E |
| CAGTTCCT db/m1 | db/m | 647  | 0.04192  | FALSE | 1.102687 | FALSE | Photoreceptor          |
| CATAAGCC db/m1 | db/m | 1323 | 0.022455 | FALSE | 0.665282 | FALSE | Photoreceptor          |
| CATAAGCC db/m1 | db/m | 880  | 0.018088 | FALSE | 0.630289 | FALSE | Photoreceptor          |
| CATAAGCC db/m1 | db/m | 2255 | 0.119124 | TRUE  | 10.34768 | TRUE  |                        |
| CATAAGCT db/m1 | db/m | 2303 | 0.046025 | FALSE | 1.171657 | FALSE | Photoreceptor          |
| CATACAGC db/m1 | db/m | 1168 | 0.039671 | FALSE | 1.965161 | FALSE | Photoreceptor          |
| CATACAGC db/m1 | db/m | 3660 | 0.012814 | FALSE | 1.470559 | FALSE | Photoreceptor          |
| CATACAGC db/m1 | db/m | 6066 | 0.031411 | FALSE | 0.947349 | FALSE | Photoreceptor          |
| CATACAGC db/m1 | db/m | 6635 | 0.026796 | FALSE | 0.624957 | FALSE | Photoreceptor          |
| CATACAGT db/m1 | db/m | 4549 | 0.042704 | FALSE | 1.057674 | FALSE | Photoreceptor          |
| CATACAGT db/m1 | db/m | 421  | 0.017434 | FALSE | 2.451275 | FALSE | Photoreceptor          |
| CATACAGT db/m1 | db/m | 1210 | 0.036232 | FALSE | 3.530219 | FALSE | Muller cell            |
| CATACCCA db/m1 | db/m | 3232 | 0.008438 | FALSE | 1.420179 | FALSE | Neuron                 |
| CATACCCA db/m1 | db/m | 3020 | 0.17103  | TRUE  | 5.550402 | TRUE  |                        |
| CATACCCA db/m1 | db/m | 401  | 0.067388 | FALSE | 43.69048 | TRUE  |                        |
| CATACCCA db/m1 | db/m | 1126 | 0.059406 | FALSE | 2.083832 | FALSE | Photoreceptor          |
| CATACCCA db/m1 | db/m | 5246 | 0.073582 | FALSE | 1.149999 | FALSE | Neuron                 |
| CATACCCG db/m1 | db/m | 583  | 0.016488 | FALSE | 2.656797 | FALSE | Endothelia Capillary E |
| CATACCCT db/m1 | db/m | 1730 | 0.035586 | FALSE | 1.101029 | FALSE | Photoreceptor          |
| CATACCCT db/m1 | db/m | 5383 | 0.033726 | FALSE | 1.008075 | FALSE | Photoreceptor          |
| CATACCCT db/m1 | db/m | 9368 | 0.080645 | FALSE | 0.64103  | FALSE | Photoreceptor          |
| CATACCCT db/m1 | db/m | 2330 | 0.054795 | FALSE | 1.327135 | FALSE | Neuron                 |
| CATACTTC db/m1 | db/m | 456  | 0.029787 | FALSE | 0.916736 | FALSE | Photoreceptor          |
| CATACTTC db/m1 | db/m | 1338 | 0.007636 | FALSE | 1.33899  | FALSE | Pericyte               |
| CATACTTG db/m1 | db/m | 2778 | 0.037564 | FALSE | 1.165239 | FALSE | Photoreceptor          |
| CATACTTT db/m1 | db/m | 4728 | 0.047807 | FALSE | 0.659577 | FALSE | Photoreceptor          |
| CATAGAC db/m1  | db/m | 640  | 0.046906 | FALSE | 4.007143 | FALSE | Photoreceptor          |
| CATAGAC db/m1  | db/m | 800  | 0.065957 | FALSE | 3.207729 | FALSE | Muller cell            |
| CATAGACC db/m1 | db/m | 2323 | 0.025868 | FALSE | 1.632809 | FALSE | Endothelia Aterial EC  |
| CATAGACC db/m1 | db/m | 7951 | 0.01981  | FALSE | 0.775972 | FALSE | Photoreceptor          |
| CATAGACC db/m1 | db/m | 2708 | 0.007058 | FALSE | 1.326315 | FALSE | Neuron                 |
| CATAGACC db/m1 | db/m | 1222 | 0.192271 | TRUE  | 20.3062  | TRUE  |                        |
| CATAGACC db/m1 | db/m | 1957 | 0.022455 | FALSE | 1.663573 | FALSE | Endothelia Capillary E |
| CATAGACC db/m1 | db/m | 1463 | 0.038953 | FALSE | 1.960332 | FALSE | Endothelia Capillary E |
| CATAGACT db/m1 | db/m | 6639 | 0.046025 | FALSE | 1.036347 | FALSE | Photoreceptor          |
| CATAGACT db/m1 | db/m | 4174 | 0.021669 | FALSE | 0.755513 | FALSE | Photoreceptor          |
| CATCAAG db/m1  | db/m | 2539 | 0.039671 | FALSE | 0.97613  | FALSE | Photoreceptor          |
| CATCAAGC db/m1 | db/m | 420  | 0.020908 | FALSE | 0.808079 | FALSE | Photoreceptor          |
| CATCAAGC db/m1 | db/m | 1095 | 0.029787 | FALSE | 1.417212 | FALSE | Photoreceptor          |
| CATCAAGT db/m1 | db/m | 649  | 0.040404 | FALSE | 4.744898 | FALSE | Neuron                 |

|                |      |      |          |       |          |       |                        |
|----------------|------|------|----------|-------|----------|-------|------------------------|
| CATCCACA db/m1 | db/m | 2434 | 0.026328 | FALSE | 1.115144 | FALSE | Endothelia Capillary E |
| CATCCACA db/m1 | db/m | 453  | 0.028251 | FALSE | 0.892278 | FALSE | Photoreceptor          |
| CATCCACA db/m1 | db/m | 1845 | 0.052669 | FALSE | 1.769573 | FALSE | Photoreceptor          |
| CATCCACA db/m1 | db/m | 1650 | 0.022059 | FALSE | 1.231899 | FALSE | Endothelia Capillary E |
| CATCCACC db/m1 | db/m | 3909 | 0.024105 | FALSE | 1.155706 | FALSE | Endothelia Capillary E |
| CATCCACC db/m1 | db/m | 1937 | 0.106408 | TRUE  | 14.2027  | TRUE  |                        |
| CATCCACC db/m1 | db/m | 2994 | 0.020171 | FALSE | 1.034751 | FALSE | Photoreceptor          |
| CATCCACC db/m1 | db/m | 2637 | 0.005264 | FALSE | 1.663192 | FALSE | Neuron                 |
| CATCCACG db/m1 | db/m | 751  | 0.071958 | FALSE | 4.895601 | FALSE | Muller cell            |
| CATCCACG db/m1 | db/m | 1410 | 0.003803 | FALSE | 1.410652 | FALSE | Neuron                 |
| CATCCACT db/m1 | db/m | 3436 | 0.01981  | FALSE | 0.680183 | FALSE | Photoreceptor          |
| CATCCCAA db/m1 | db/m | 2135 | 0.036891 | FALSE | 1.127093 | FALSE | Photoreceptor          |
| CATCCCAA db/m1 | db/m | 4791 | 0.020171 | FALSE | 0.877091 | FALSE | Photoreceptor          |
| CATCCCAC db/m1 | db/m | 1090 | 0.031973 | FALSE | 1.961883 | FALSE | Photoreceptor          |
| CATCCCAC db/m1 | db/m | 461  | 0.049679 | FALSE | 4.955856 | FALSE | Muller cell            |
| CATCCCAC db/m1 | db/m | 3090 | 0.044326 | FALSE | 1.320195 | FALSE | Endothelia Capillary E |
| CATCCCAG db/m1 | db/m | 1100 | 0.071958 | FALSE | 1.740665 | FALSE | Photoreceptor          |
| CATCCCAT db/m1 | db/m | 6687 | 0.012303 | FALSE | 0.994069 | FALSE | Photoreceptor          |
| CATCCGTA db/m1 | db/m | 8278 | 0.010157 | FALSE | 0.900402 | FALSE | Photoreceptor          |
| CATCCGTC db/m1 | db/m | 460  | 0.012814 | FALSE | 0.610403 | FALSE | Photoreceptor          |
| CATCCGTC db/m1 | db/m | 1267 | 0.017434 | FALSE | 1.697935 | FALSE | Endothelia Capillary E |
| CATCCGTT db/m1 | db/m | 2535 | 0.115723 | TRUE  | 7.900677 | TRUE  |                        |
| CATCGCTA db/m1 | db/m | 1829 | 0.130374 | TRUE  | 5.653193 | TRUE  |                        |
| CATCGCTA db/m1 | db/m | 2006 | 0.296296 | TRUE  | 24.91839 | TRUE  |                        |
| CATCGCTA db/m1 | db/m | 1303 | 0.047807 | FALSE | 1.368596 | FALSE | Photoreceptor          |
| CATCGCTC db/m1 | db/m | 879  | 0.038953 | FALSE | 0.749695 | FALSE | Photoreceptor          |
| CATCGCTT db/m1 | db/m | 2309 | 0.018761 | FALSE | 1.558478 | FALSE | Endothelia Capillary E |
| CATCGGG/ db/m1 | db/m | 771  | 0.063221 | FALSE | 1.981793 | FALSE | Neuron                 |
| CATCGGG/ db/m1 | db/m | 7643 | 0.029787 | FALSE | 0.700982 | FALSE | Photoreceptor          |
| CATCGGG( db/m1 | db/m | 1215 | 0.028754 | FALSE | 1.151171 | FALSE | Photoreceptor          |
| CATCGGG( db/m1 | db/m | 7169 | 0.011081 | FALSE | 1.152987 | FALSE | Photoreceptor          |
| CATCGGG( db/m1 | db/m | 6765 | 0.008644 | FALSE | 1.064873 | FALSE | Photoreceptor          |
| CATCGGG  db/m1 | db/m | 1472 | 0.029266 | FALSE | 0.854099 | FALSE | Photoreceptor          |
| CATCGGG  db/m1 | db/m | 419  | 0.028754 | FALSE | 1.045355 | FALSE | Photoreceptor          |
| CATCGGG  db/m1 | db/m | 543  | 0.023266 | FALSE | 1.64382  | FALSE | Photoreceptor          |
| CATCGGG  db/m1 | db/m | 3124 | 0.022455 | FALSE | 1.058058 | FALSE | Endothelia Aterial EC  |
| CATCGTCA db/m1 | db/m | 633  | 0.026328 | FALSE | 2.992264 | FALSE | Pericyte               |
| CATCGTCA db/m1 | db/m | 1534 | 0.028754 | FALSE | 4.264163 | FALSE | Muller cell            |
| CATCGTCA db/m1 | db/m | 5960 | 0.011319 | FALSE | 1.079043 | FALSE | Photoreceptor          |
| CATCGTCC db/m1 | db/m | 5172 | 0.029787 | FALSE | 1.107231 | FALSE | Photoreceptor          |
| CATCGTCC db/m1 | db/m | 430  | 0.020171 | FALSE | 2.74252  | FALSE | Muller cell            |
| CATCGTCC db/m1 | db/m | 3333 | 0.012814 | FALSE | 1.366255 | FALSE | Photoreceptor          |
| CATCGTCC db/m1 | db/m | 534  | 0.025416 | FALSE | 2.519347 | FALSE | Photoreceptor          |
| CATCGTCT db/m1 | db/m | 1299 | 0.041154 | FALSE | 4.843164 | FALSE | Muller cell            |
| CATCGTCT db/m1 | db/m | 746  | 0.017758 | FALSE | 1.315345 | FALSE | Photoreceptor          |
| CATGAGT/ db/m1 | db/m | 4364 | 0.044326 | FALSE | 1.300339 | FALSE | Photoreceptor          |
| CATGAGTC db/m1 | db/m | 2015 | 0.048732 | FALSE | 1.545517 | FALSE | Pericyte               |

|                |      |      |          |       |          |       |                        |
|----------------|------|------|----------|-------|----------|-------|------------------------|
| CATGAGTC db/m1 | db/m | 7889 | 0.012814 | FALSE | 0.899592 | FALSE | Photoreceptor          |
| CATGAGTC db/m1 | db/m | 3774 | 0.091004 | FALSE | 1.255825 | FALSE | Endothelia Venous EC   |
| CATGAGTC db/m1 | db/m | 4620 | 0.036891 | FALSE | 1.021646 | FALSE | Photoreceptor          |
| CATGAGTI db/m1 | db/m | 541  | 0.046025 | FALSE | 1.895791 | FALSE | Endothelia Capillary E |
| CATGCAA db/m1  | db/m | 1605 | 0.012052 | FALSE | 1.349191 | FALSE | Endothelia Capillary E |
| CATGCAA db/m1  | db/m | 1618 | 0.075259 | FALSE | 1.560866 | FALSE | Photoreceptor          |
| CATGCAAC db/m1 | db/m | 3817 | 0.020171 | FALSE | 0.785563 | FALSE | Photoreceptor          |
| CATGCAAC db/m1 | db/m | 2925 | 0.012814 | FALSE | 1.322484 | FALSE | Endothelia Venous EC   |
| CATGCAAC db/m1 | db/m | 530  | 0.13452  | TRUE  | 16.38418 | TRUE  |                        |
| CATGCAAC db/m1 | db/m | 446  | 0.048732 | FALSE | 15.98241 | TRUE  |                        |
| CATGCAAC db/m1 | db/m | 2736 | 0.004762 | FALSE | 1.153725 | FALSE | Neuron                 |
| CATGCCTC db/m1 | db/m | 2041 | 0.021669 | FALSE | 2.057094 | FALSE | Neuron                 |
| CATGCCTC db/m1 | db/m | 1019 | 0.059406 | FALSE | 1.123033 | FALSE | Photoreceptor          |
| CATGCCTC db/m1 | db/m | 935  | 0.026796 | FALSE | 1.132313 | FALSE | Photoreceptor          |
| CATGCCTC db/m1 | db/m | 2457 | 0.055901 | FALSE | 2.755934 | FALSE | Muller cell            |
| CATGCCTT db/m1 | db/m | 1130 | 0.080645 | FALSE | 2.464847 | FALSE | Muller cell            |
| CATGCCTT db/m1 | db/m | 1678 | 0.067388 | FALSE | 2.162701 | FALSE | Photoreceptor          |
| CATGCGG db/m1  | db/m | 3117 | 0.022857 | FALSE | 1.365092 | FALSE | Endothelia Venous EC   |
| CATGCGG db/m1  | db/m | 2848 | 0.135645 | TRUE  | 4.200343 | FALSE |                        |
| CATGCGG db/m1  | db/m | 4127 | 0.036232 | FALSE | 1.047403 | FALSE | Photoreceptor          |
| CATGCGG db/m1  | db/m | 821  | 0.011561 | FALSE | 0.259694 | FALSE | Photoreceptor          |
| CATGCGG db/m1  | db/m | 339  | 0.046025 | FALSE | 4.778338 | FALSE | Muller cell            |
| CATGCGG db/m1  | db/m | 774  | 0.030859 | FALSE | 1.295171 | FALSE | Photoreceptor          |
| CATGCGG db/m1  | db/m | 842  | 0.049679 | FALSE | 3.458805 | FALSE | Muller cell            |
| CATGCGG db/m1  | db/m | 2475 | 0.030318 | FALSE | 1.714272 | FALSE | Endothelia Venous EC   |
| CATGCGG db/m1  | db/m | 1757 | 0.076994 | FALSE | 1.575791 | FALSE | Photoreceptor          |
| CATGCTCA db/m1 | db/m | 996  | 0.048732 | FALSE | 2.020017 | FALSE | Photoreceptor          |
| CATGCTCC db/m1 | db/m | 559  | 0.031411 | FALSE | 1.388401 | FALSE | Photoreceptor          |
| CATGCTCC db/m1 | db/m | 2150 | 0.037564 | FALSE | 1.649826 | FALSE | Endothelia Capillary E |
| CATGCTCC db/m1 | db/m | 1377 | 0.063221 | FALSE | 3.938531 | FALSE | Muller cell            |
| CATGCTCG db/m1 | db/m | 909  | 0.012052 | FALSE | 0.358043 | FALSE | Photoreceptor          |
| CATGCTCT db/m1 | db/m | 604  | 0.042704 | FALSE | 3.958858 | FALSE | Muller cell            |
| CATGCTCT db/m1 | db/m | 5237 | 0.012557 | FALSE | 1.045255 | FALSE | Photoreceptor          |
| CATGGATC db/m1 | db/m | 3183 | 0.020908 | FALSE | 0.96395  | FALSE | Endothelia Capillary E |
| CATGGATC db/m1 | db/m | 1979 | 0.059406 | FALSE | 1.538705 | FALSE | Photoreceptor          |
| CATGGATC db/m1 | db/m | 7126 | 0.018422 | FALSE | 0.948334 | FALSE | Photoreceptor          |
| CATGGATC db/m1 | db/m | 2932 | 0.065957 | FALSE | 5.654859 | TRUE  |                        |
| CATGGATC db/m1 | db/m | 789  | 0.067388 | FALSE | 4.2924   | FALSE | Muller cell            |
| CATGGATC db/m1 | db/m | 2149 | 0.037564 | FALSE | 1.742601 | FALSE | Neuron                 |
| CATGGATC db/m1 | db/m | 1516 | 0.010157 | FALSE | 1.470196 | FALSE | Endothelia Capillary E |
| CATGGATI db/m1 | db/m | 3091 | 0.075259 | FALSE | 1.163148 | FALSE | Photoreceptor          |
| CATGGATI db/m1 | db/m | 2105 | 0.058205 | FALSE | 1.472015 | FALSE | Pericyte               |
| CATGGATI db/m1 | db/m | 458  | 0.04192  | FALSE | 0.786276 | FALSE | Photoreceptor          |
| CATGGTA db/m1  | db/m | 465  | 0.05065  | FALSE | 2.797315 | FALSE | Endothelia Capillary E |
| CATGGTAC db/m1 | db/m | 1804 | 0.073582 | FALSE | 29.65532 | TRUE  |                        |
| CATGGTAC db/m1 | db/m | 1068 | 0.091004 | FALSE | 1.695878 | FALSE | Photoreceptor          |
| CATGGTAC db/m1 | db/m | 4142 | 0.046025 | FALSE | 0.856986 | FALSE | Neuron                 |

|                |      |      |          |       |          |       |                        |
|----------------|------|------|----------|-------|----------|-------|------------------------|
| CATGGTAC db/m1 | db/m | 389  | 0.022455 | FALSE | 3.516743 | FALSE | Photoreceptor          |
| CATGGTAC db/m1 | db/m | 1741 | 0.011561 | FALSE | 1.162053 | FALSE | Endothelia Aterial EC  |
| CATGGTAT db/m1 | db/m | 3366 | 0.022059 | FALSE | 1.104308 | FALSE | Endothelia Venous EC   |
| CATGGTAT db/m1 | db/m | 543  | 0.031411 | FALSE | 3.828322 | FALSE | Muller cell            |
| CATTCATA db/m1 | db/m | 2388 | 0.047807 | FALSE | 1.865239 | FALSE | Photoreceptor          |
| CATTCATA db/m1 | db/m | 7022 | 0.034334 | FALSE | 0.944002 | FALSE | Photoreceptor          |
| CATTCATC db/m1 | db/m | 5591 | 0.038953 | FALSE | 1.19488  | FALSE | Photoreceptor          |
| CATTCATG db/m1 | db/m | 2350 | 0.022059 | FALSE | 1.362893 | FALSE | Endothelia Capillary E |
| CATTCATT db/m1 | db/m | 1356 | 0.034334 | FALSE | 0.874835 | FALSE | Photoreceptor          |
| CATTCATT db/m1 | db/m | 1481 | 0.022857 | FALSE | 1.378012 | FALSE | Photoreceptor          |
| CATTCCGA db/m1 | db/m | 1100 | 0.041154 | FALSE | 2.34884  | FALSE | Photoreceptor          |
| CATTCCGG db/m1 | db/m | 9018 | 0.01981  | FALSE | 0.747894 | FALSE | Photoreceptor          |
| CATTCCGT db/m1 | db/m | 867  | 0.022455 | FALSE | 0.448252 | FALSE | Photoreceptor          |
| CATTCTAA db/m1 | db/m | 7926 | 0.048732 | FALSE | 0.759524 | FALSE | Photoreceptor          |
| CATTCTAC db/m1 | db/m | 1456 | 0.038251 | FALSE | 2.611422 | FALSE | Photoreceptor          |
| CATTCTAG db/m1 | db/m | 2924 | 0.011081 | FALSE | 1.483951 | FALSE | Photoreceptor          |
| CATTCTAG db/m1 | db/m | 2662 | 0.075259 | FALSE | 2.305461 | FALSE | Muller cell            |
| CATTCTAG db/m1 | db/m | 6573 | 0.184701 | TRUE  | 3.683447 | FALSE |                        |
| CATTCTAT db/m1 | db/m | 644  | 0.048732 | FALSE | 1.199369 | FALSE | Photoreceptor          |
| CATTGAGC db/m1 | db/m | 1168 | 0.057037 | FALSE | 0.67252  | FALSE | Photoreceptor          |
| CATTGAGT db/m1 | db/m | 1191 | 0.021286 | FALSE | 0.987625 | FALSE | Photoreceptor          |
| CATTGCCA db/m1 | db/m | 2297 | 0.027758 | FALSE | 0.998909 | FALSE | Endothelia Capillary E |
| CATTGCCC db/m1 | db/m | 1071 | 0.034954 | FALSE | 1.468127 | FALSE | Photoreceptor          |
| CATTGCCT db/m1 | db/m | 3081 | 0.019455 | FALSE | 1.638258 | FALSE | Neuron                 |
| CATTGTTA db/m1 | db/m | 423  | 0.049679 | FALSE | 3.716734 | FALSE | Muller cell            |
| CATTGTTA db/m1 | db/m | 1133 | 0.043505 | FALSE | 2.072427 | FALSE | Photoreceptor          |
| CATTGTTA db/m1 | db/m | 903  | 0.03313  | FALSE | 1.425923 | FALSE | Photoreceptor          |
| CATTGTTA db/m1 | db/m | 1198 | 0.024105 | FALSE | 0.866621 | FALSE | Photoreceptor          |
| CATTGTTG db/m1 | db/m | 703  | 0.035586 | FALSE | 4.985238 | FALSE | Muller cell            |
| CATTGTTT db/m1 | db/m | 1203 | 0.03313  | FALSE | 0.643039 | FALSE | Photoreceptor          |
| CATTGTTT db/m1 | db/m | 2564 | 0.003649 | FALSE | 0.585044 | FALSE | Neuron                 |
| CATTTCAA db/m1 | db/m | 926  | 0.088776 | FALSE | 1.936459 | FALSE | Photoreceptor          |
| CATTTCAC db/m1 | db/m | 1982 | 0.019106 | FALSE | 1.005305 | FALSE | Photoreceptor          |
| CATTTCAG db/m1 | db/m | 511  | 0.046025 | FALSE | 1.252495 | FALSE | Photoreceptor          |
| CATTTCAG db/m1 | db/m | 1845 | 0.024534 | FALSE | 1.203653 | FALSE | Endothelia Venous EC   |
| CATTTCAG db/m1 | db/m | 444  | 0.019455 | FALSE | 2.886998 | FALSE | Photoreceptor          |
| CATTTCAT db/m1 | db/m | 633  | 0.071958 | FALSE | 2.012815 | FALSE | Muller cell            |
| CATTTCAT db/m1 | db/m | 1373 | 0.023682 | FALSE | 1.678511 | FALSE | Photoreceptor          |
| CCAAGCG db/m1  | db/m | 9168 | 0.021286 | FALSE | 0.728293 | FALSE | Photoreceptor          |
| CCAAGCG db/m1  | db/m | 493  | 0.013074 | FALSE | 3.319223 | FALSE | Photoreceptor          |
| CCAAGCG db/m1  | db/m | 513  | 0.041154 | FALSE | 1.379305 | FALSE | Photoreceptor          |
| CCAAGCG db/m1  | db/m | 1216 | 0.080645 | FALSE | 2.291845 | FALSE | Endothelia Capillary E |
| CCAAGCG db/m1  | db/m | 1343 | 0.049679 | FALSE | 1.420744 | FALSE | Photoreceptor          |
| CCAATGA db/m1  | db/m | 502  | 0.022059 | FALSE | 1.357666 | FALSE | Photoreceptor          |
| CCAATGAC db/m1 | db/m | 3717 | 0.022857 | FALSE | 1.074563 | FALSE | Endothelia Venous EC   |
| CCAATGAC db/m1 | db/m | 967  | 0.037564 | FALSE | 0.81404  | FALSE | Photoreceptor          |
| CCAATGAC db/m1 | db/m | 447  | 0.036891 | FALSE | 1.13648  | FALSE | Photoreceptor          |

|                |      |      |          |       |          |       |                        |
|----------------|------|------|----------|-------|----------|-------|------------------------|
| CCAATGAC db/m1 | db/m | 5204 | 0.022857 | FALSE | 0.972108 | FALSE | Photoreceptor          |
| CCAATGAT db/m1 | db/m | 2502 | 0.031411 | FALSE | 1.66779  | FALSE | Endothelia Capillary E |
| CCAATGAT db/m1 | db/m | 2426 | 0.022857 | FALSE | 1.229419 | FALSE | Endothelia Capillary E |
| CCAATTTA db/m1 | db/m | 4286 | 0.054795 | FALSE | 0.859793 | FALSE | Photoreceptor          |
| CCAATTTA db/m1 | db/m | 3261 | 0.012557 | FALSE | 1.318225 | FALSE | Endothelia Venous EC   |
| CCAATTTA db/m1 | db/m | 905  | 0.036232 | FALSE | 0.806143 | FALSE | Photoreceptor          |
| CCAATTTT db/m1 | db/m | 6589 | 0.017434 | FALSE | 0.868052 | FALSE | Photoreceptor          |
| CCAATTTG db/m1 | db/m | 2971 | 0.093319 | FALSE | 1.466255 | FALSE | Photoreceptor          |
| CCAATTTT db/m1 | db/m | 6923 | 0.029266 | FALSE | 0.900816 | FALSE | Photoreceptor          |
| CCACAAA db/m1  | db/m | 719  | 0.037564 | FALSE | 1.199797 | FALSE | Photoreceptor          |
| CCACAAA db/m1  | db/m | 529  | 0.076994 | FALSE | 4.278174 | FALSE | Muller cell            |
| CCACAAAC db/m1 | db/m | 546  | 0.024971 | FALSE | 2.085041 | FALSE | Muller cell            |
| CCACAAAC db/m1 | db/m | 414  | 0.030318 | FALSE | 1.050859 | FALSE | Photoreceptor          |
| CCACAAAC db/m1 | db/m | 2834 | 0.020536 | FALSE | 1.491617 | FALSE | Endothelia Capillary E |
| CCACACTA db/m1 | db/m | 545  | 0.024105 | FALSE | 0.691402 | FALSE | Photoreceptor          |
| CCACACTA db/m1 | db/m | 3414 | 0.027758 | FALSE | 1.385814 | FALSE | Endothelia Venous EC   |
| CCACACTG db/m1 | db/m | 699  | 0.296296 | TRUE  | 8.993157 | TRUE  |                        |
| CCACACTG db/m1 | db/m | 3759 | 0.041154 | FALSE | 1.394986 | FALSE | Photoreceptor          |
| CCACACTG db/m1 | db/m | 365  | 0.017434 | FALSE | 3.63276  | FALSE | Endothelia Capillary E |
| CCACACTT db/m1 | db/m | 1518 | 0.011081 | FALSE | 1.459752 | FALSE | Endothelia Capillary E |
| CCACACTT db/m1 | db/m | 1140 | 0.009493 | FALSE | 1.49631  | FALSE | Endothelia Capillary E |
| CCACACTT db/m1 | db/m | 6974 | 0.008852 | FALSE | 0.970036 | FALSE | Photoreceptor          |
| CCACCATA db/m1 | db/m | 1228 | 0.026796 | FALSE | 1.752693 | FALSE | Photoreceptor          |
| CCACCATA db/m1 | db/m | 3466 | 0.017434 | FALSE | 0.829629 | FALSE | Photoreceptor          |
| CCACCATA db/m1 | db/m | 1245 | 0.093319 | FALSE | 16.06264 | TRUE  |                        |
| CCACCATA db/m1 | db/m | 1417 | 0.045165 | FALSE | 1.162177 | FALSE | Photoreceptor          |
| CCACCATC db/m1 | db/m | 1136 | 0.017114 | FALSE | 0.789812 | FALSE | Photoreceptor          |
| CCACCATG db/m1 | db/m | 2332 | 0.008644 | FALSE | 1.322099 | FALSE | Neuron                 |
| CCACCATT db/m1 | db/m | 1004 | 0.047807 | FALSE | 2.391216 | FALSE | Photoreceptor          |
| CCACGAG db/m1  | db/m | 797  | 0.058205 | FALSE | 28.96244 | TRUE  |                        |
| CCACGAG db/m1  | db/m | 3422 | 0.030318 | FALSE | 1.336909 | FALSE | Photoreceptor          |
| CCACGAG db/m1  | db/m | 1257 | 0.030318 | FALSE | 1.290291 | FALSE | Photoreceptor          |
| CCACGAG db/m1  | db/m | 2429 | 0.018088 | FALSE | 1.281629 | FALSE | Endothelia Venous EC   |
| CCACGAG db/m1  | db/m | 1403 | 0.027273 | FALSE | 1.386964 | FALSE | Photoreceptor          |
| CCACGAG db/m1  | db/m | 1278 | 0.036891 | FALSE | 1.686331 | FALSE | Photoreceptor          |
| CCACGTTA db/m1 | db/m | 4750 | 0.034954 | FALSE | 1.233892 | FALSE | Photoreceptor          |
| CCACGTTA db/m1 | db/m | 1615 | 0.030859 | FALSE | 1.329408 | FALSE | Photoreceptor          |
| CCACGTTC db/m1 | db/m | 1229 | 0.025416 | FALSE | 1.360014 | FALSE | Photoreceptor          |
| CCACGTTT db/m1 | db/m | 1010 | 0.013074 | FALSE | 0.593545 | FALSE | Photoreceptor          |
| CCACGTTT db/m1 | db/m | 790  | 0.029266 | FALSE | 1.392157 | FALSE | Photoreceptor          |
| CCACGTTT db/m1 | db/m | 1444 | 0.053718 | FALSE | 0.526218 | FALSE | Photoreceptor          |
| CCACTTGA db/m1 | db/m | 1131 | 0.008438 | FALSE | 1.934438 | FALSE | Endothelia Capillary E |
| CCACTTGC db/m1 | db/m | 5572 | 0.020908 | FALSE | 0.704732 | FALSE | Photoreceptor          |
| CCACTTGC db/m1 | db/m | 4981 | 0.019106 | FALSE | 0.971854 | FALSE | Photoreceptor          |
| CCACTTGT db/m1 | db/m | 956  | 0.038953 | FALSE | 1.170532 | FALSE | Photoreceptor          |
| CCATAAG db/m1  | db/m | 2496 | 0.003649 | FALSE | 0.945396 | FALSE | Neuron                 |
| CCATAAG db/m1  | db/m | 1518 | 0.036891 | FALSE | 0.89196  | FALSE | Photoreceptor          |

|                |      |      |          |       |          |       |                        |
|----------------|------|------|----------|-------|----------|-------|------------------------|
| CCATAAGT db/m1 | db/m | 879  | 0.025868 | FALSE | 1.61602  | FALSE | Photoreceptor          |
| CCATAAGT db/m1 | db/m | 2074 | 0.058205 | FALSE | 1.636981 | FALSE | Photoreceptor          |
| CCATAAGT db/m1 | db/m | 1346 | 0.128582 | TRUE  | 3.995621 | FALSE |                        |
| CCATCACA db/m1 | db/m | 5945 | 0.040404 | FALSE | 1.227468 | FALSE | Photoreceptor          |
| CCATCACG db/m1 | db/m | 5340 | 0.022455 | FALSE | 1.180698 | FALSE | Photoreceptor          |
| CCATCACG db/m1 | db/m | 4775 | 0.024534 | FALSE | 1.154249 | FALSE | Photoreceptor          |
| CCATCACG db/m1 | db/m | 2820 | 0.038251 | FALSE | 1.068136 | FALSE | Photoreceptor          |
| CCATCACT db/m1 | db/m | 4188 | 0.007441 | FALSE | 1.047266 | FALSE | Photoreceptor          |
| CCATCACT db/m1 | db/m | 3809 | 0.014711 | FALSE | 1.051182 | FALSE | Endothelia Venous EC   |
| CCCAACTG db/m1 | db/m | 1290 | 0.01981  | FALSE | 0.708929 | FALSE | Photoreceptor          |
| CCCAACTG db/m1 | db/m | 1649 | 0.054795 | FALSE | 1.762856 | FALSE | Photoreceptor          |
| CCCAACTT db/m1 | db/m | 3906 | 0.049679 | FALSE | 1.144424 | FALSE | Photoreceptor          |
| CCCAACTT db/m1 | db/m | 1451 | 0.009933 | FALSE | 1.068521 | FALSE | Endothelia Aterial EC  |
| CCCAACTT db/m1 | db/m | 3658 | 0.058205 | FALSE | 2.382963 | FALSE | Neuron                 |
| CCCAACTT db/m1 | db/m | 2781 | 0.034954 | FALSE | 1.355554 | FALSE | Neuron                 |
| CCCATTGA db/m1 | db/m | 3948 | 0.053718 | FALSE | 1.474183 | FALSE | Neuron                 |
| CCCATTGA db/m1 | db/m | 1271 | 0.027273 | FALSE | 1.027233 | FALSE | Photoreceptor          |
| CCCATTGC db/m1 | db/m | 441  | 0.038953 | FALSE | 60.53255 | TRUE  |                        |
| CCCATTGC db/m1 | db/m | 1506 | 0.070386 | FALSE | 10.71429 | TRUE  |                        |
| CCCATTGT db/m1 | db/m | 2049 | 0.063221 | FALSE | 2.375938 | FALSE | Muller cell            |
| CCCATTGT db/m1 | db/m | 997  | 0.030318 | FALSE | 4.242806 | FALSE | Muller cell            |
| CCCGAAG/ db/m1 | db/m | 3237 | 0.029266 | FALSE | 0.810343 | FALSE | Photoreceptor          |
| CCCGAAG/ db/m1 | db/m | 2543 | 0.011805 | FALSE | 1.168428 | FALSE | Endothelia Capillary E |
| CCCGAAG/ db/m1 | db/m | 484  | 0.028754 | FALSE | 3.075295 | FALSE | Muller cell            |
| CCCGAAG/ db/m1 | db/m | 452  | 0.03313  | FALSE | 46.42517 | TRUE  |                        |
| CCCGAAG( db/m1 | db/m | 392  | 0.023682 | FALSE | 2.04115  | FALSE | Photoreceptor          |
| CCCGAAG( db/m1 | db/m | 3872 | 0.028251 | FALSE | 1.477769 | FALSE | Photoreceptor          |
| CCCGAAG( db/m1 | db/m | 1765 | 0.025868 | FALSE | 0.557366 | FALSE | Photoreceptor          |
| CCCGAAG( db/m1 | db/m | 992  | 0.008852 | FALSE | 2.120378 | FALSE | Pericyte               |
| CCCGAAG  db/m1 | db/m | 926  | 0.076994 | FALSE | 2.776718 | FALSE | Endothelia Capillary E |
| CCCGGAA/ db/m1 | db/m | 926  | 0.059406 | FALSE | 1.543706 | FALSE | Photoreceptor          |
| CCCGGAA( db/m1 | db/m | 676  | 0.017434 | FALSE | 0.581685 | FALSE | Photoreceptor          |
| CCCGGAA( db/m1 | db/m | 1334 | 0.028754 | FALSE | 3.48035  | FALSE | Muller cell            |
| CCCGGAA( db/m1 | db/m | 385  | 0.015581 | FALSE | 2.626528 | FALSE | Photoreceptor          |
| CCCGGAA  db/m1 | db/m | 1029 | 0.064568 | FALSE | 1.092377 | FALSE | Photoreceptor          |
| CCCTAACA db/m1 | db/m | 5166 | 0.040404 | FALSE | 1.184    | FALSE | Photoreceptor          |
| CCCTAACC db/m1 | db/m | 3285 | 0.057037 | FALSE | 1.107445 | FALSE | Photoreceptor          |
| CCCTAACC db/m1 | db/m | 1061 | 0.022857 | FALSE | 0.677813 | FALSE | Photoreceptor          |
| CCCTAACC db/m1 | db/m | 2813 | 0.003959 | FALSE | 1.437657 | FALSE | Neuron                 |
| CCCTAACC db/m1 | db/m | 7192 | 0.010157 | FALSE | 1.048615 | FALSE | Photoreceptor          |
| CCCTAACG db/m1 | db/m | 2009 | 0.045165 | FALSE | 1.150344 | FALSE | Photoreceptor          |
| CCCTAACT db/m1 | db/m | 9089 | 0.047807 | FALSE | 0.64903  | FALSE | Photoreceptor          |
| CCCTCAAA db/m1 | db/m | 3246 | 0.019106 | FALSE | 1.401881 | FALSE | Photoreceptor          |
| CCCTCAAC db/m1 | db/m | 3751 | 0.023682 | FALSE | 1.188928 | FALSE | Endothelia Capillary E |
| CCCTCAAC db/m1 | db/m | 4845 | 0.008032 | FALSE | 1.088301 | FALSE | Photoreceptor          |
| CCCTCAAG db/m1 | db/m | 1426 | 0.031411 | FALSE | 1.279158 | FALSE | Photoreceptor          |
| CCCTCAAT db/m1 | db/m | 857  | 0.007058 | FALSE | 1.577778 | FALSE | Pericyte               |

|                |      |      |          |       |          |       |                         |
|----------------|------|------|----------|-------|----------|-------|-------------------------|
| CCCTCTCA db/m1 | db/m | 7886 | 0.041154 | FALSE | 0.810263 | FALSE | Photoreceptor           |
| CCCTCTCC db/m1 | db/m | 4835 | 0.014997 | FALSE | 0.535631 | FALSE | Photoreceptor           |
| CCCTCTCC db/m1 | db/m | 7294 | 0.112477 | TRUE  | 0.966627 | FALSE |                         |
| CCCTCTCC db/m1 | db/m | 4027 | 0.024534 | FALSE | 1.196253 | FALSE | Endothelia Venous EC    |
| CCCTCTCC db/m1 | db/m | 3178 | 0.060641 | FALSE | 7.500001 | TRUE  |                         |
| CCCTCTCG db/m1 | db/m | 6724 | 0.119124 | TRUE  | 4.13127  | FALSE |                         |
| CCCTGATA db/m1 | db/m | 3922 | 0.063221 | FALSE | 1.307126 | FALSE | Photoreceptor           |
| CCCTGATC db/m1 | db/m | 7753 | 0.023266 | FALSE | 0.721366 | FALSE | Photoreceptor           |
| CCCTGATC db/m1 | db/m | 466  | 0.036232 | FALSE | 3.778855 | FALSE | Muller cell             |
| CCCTGATC db/m1 | db/m | 1707 | 0.019106 | FALSE | 1.67671  | FALSE | Endothelia Capillary EC |
| CCCTGATT db/m1 | db/m | 3301 | 0.042704 | FALSE | 1.22326  | FALSE | Photoreceptor           |
| CCCTGATT db/m1 | db/m | 2635 | 0.05065  | FALSE | 1.315392 | FALSE | Photoreceptor           |
| CCCTGATT db/m1 | db/m | 3852 | 0.034334 | FALSE | 1.235847 | FALSE | Photoreceptor           |
| CCCTTAGA db/m1 | db/m | 995  | 0.037564 | FALSE | 1.211495 | FALSE | Photoreceptor           |
| CCCTTAGC db/m1 | db/m | 834  | 0.080645 | FALSE | 4.274692 | FALSE | Muller cell             |
| CCCTTAGC db/m1 | db/m | 1679 | 0.020908 | FALSE | 1.255885 | FALSE | Endothelia Capillary EC |
| CCCTTAGC db/m1 | db/m | 8233 | 0.011081 | FALSE | 0.710003 | FALSE | Photoreceptor           |
| CCCTTAGT db/m1 | db/m | 1905 | 0.115641 | TRUE  | 0.487246 | FALSE |                         |
| CCGAACG/ db/m1 | db/m | 2190 | 0.022059 | FALSE | 1.622567 | FALSE | Neuron                  |
| CCGAACG/ db/m1 | db/m | 4282 | 0.031973 | FALSE | 1.120399 | FALSE | Photoreceptor           |
| CCGAACG/ db/m1 | db/m | 1065 | 0.039671 | FALSE | 1.469484 | FALSE | Neuron                  |
| CCGAACG/ db/m1 | db/m | 6857 | 0.007441 | FALSE | 1.072425 | FALSE | Photoreceptor           |
| CCGAACG/ db/m1 | db/m | 1343 | 0.011561 | FALSE | 0.98352  | FALSE | Endothelia Aterial EC   |
| CCGAACG/ db/m1 | db/m | 7486 | 0.014429 | FALSE | 0.910835 | FALSE | Photoreceptor           |
| CCGAACG( db/m1 | db/m | 5599 | 0.026796 | FALSE | 0.592468 | FALSE | Photoreceptor           |
| CCGAACG( db/m1 | db/m | 1179 | 0.015287 | FALSE | 0.944055 | FALSE | Photoreceptor           |
| CCGAACG( db/m1 | db/m | 3473 | 0.041154 | FALSE | 1.128583 | FALSE | Photoreceptor           |
| CCGAACG( db/m1 | db/m | 1213 | 0.064568 | FALSE | 1.786304 | FALSE | Endothelia Capillary EC |
| CCGAACG( db/m1 | db/m | 1947 | 0.030859 | FALSE | 1.695467 | FALSE | Photoreceptor           |
| CCGAACG  db/m1 | db/m | 884  | 0.005958 | FALSE | 1.55686  | FALSE | Endothelia Capillary EC |
| CCGAACG  db/m1 | db/m | 4904 | 0.018088 | FALSE | 0.834867 | FALSE | Photoreceptor           |
| CCGATCTA db/m1 | db/m | 1112 | 0.014711 | FALSE | 2.728828 | FALSE | Pericyte                |
| CCGATCTA db/m1 | db/m | 4184 | 0.067388 | FALSE | 1.267552 | FALSE | Neuron                  |
| CCGATCTC db/m1 | db/m | 1606 | 0.060641 | FALSE | 1.989799 | FALSE | Photoreceptor           |
| CCGATCTC db/m1 | db/m | 8281 | 0.016488 | FALSE | 0.923139 | FALSE | Photoreceptor           |
| CCGATCTC db/m1 | db/m | 481  | 0.017434 | FALSE | 2.81176  | FALSE | Photoreceptor           |
| CCGATCTC db/m1 | db/m | 4952 | 0.025868 | FALSE | 1.070041 | FALSE | Photoreceptor           |
| CCGATGG/ db/m1 | db/m | 6830 | 0.148377 | TRUE  | 2.455015 | FALSE |                         |
| CCGATGG/ db/m1 | db/m | 414  | 0.038251 | FALSE | 30.39349 | TRUE  |                         |
| CCGATGG( db/m1 | db/m | 444  | 0.058205 | FALSE | 2.410933 | FALSE | Photoreceptor           |
| CCGATGG( db/m1 | db/m | 6114 | 0.055901 | FALSE | 1.069997 | FALSE | Photoreceptor           |
| CCGATGG( db/m1 | db/m | 2153 | 0.054795 | FALSE | 2.065914 | FALSE | Endothelia Capillary EC |
| CCGATGG  db/m1 | db/m | 1124 | 0.031411 | FALSE | 1.148158 | FALSE | Photoreceptor           |
| CCGCAAG( db/m1 | db/m | 504  | 0.03313  | FALSE | 0.867028 | FALSE | Photoreceptor           |
| CCGCAAG( db/m1 | db/m | 885  | 0.006137 | FALSE | 1.980511 | FALSE | Pericyte                |
| CCGCAAG( db/m1 | db/m | 762  | 0.24     | TRUE  | 11.30199 | TRUE  |                         |
| CCGCAAG( db/m1 | db/m | 1475 | 0.035586 | FALSE | 1.487639 | FALSE | Photoreceptor           |



|                |      |      |          |       |          |       |                        |
|----------------|------|------|----------|-------|----------|-------|------------------------|
| CCGCAAGTdb/m1  | db/m | 3866 | 0.029787 | FALSE | 1.370202 | FALSE | Photoreceptor          |
| CCGGACA/db/m1  | db/m | 4773 | 0.017434 | FALSE | 1.099874 | FALSE | Endothelia Venous EC   |
| CCGGACA/db/m1  | db/m | 2794 | 0.020536 | FALSE | 1.190781 | FALSE | Endothelia Venous EC   |
| CCGGACA(db/m1  | db/m | 4114 | 0.044326 | FALSE | 0.971916 | FALSE | Photoreceptor          |
| CCGGACA(db/m1  | db/m | 7642 | 0.006683 | FALSE | 0.863844 | FALSE | Photoreceptor          |
| CCGGACA(db/m1  | db/m | 491  | 0.033726 | FALSE | 4.181841 | FALSE | Pericyte               |
| CCGGGTA/db/m1  | db/m | 1059 | 0.020171 | FALSE | 1.413166 | FALSE | Endothelia Venous EC   |
| CCGGGTA(db/m1  | db/m | 383  | 0.014429 | FALSE | 2.037555 | FALSE | Photoreceptor          |
| CCGGGTA(db/m1  | db/m | 1469 | 0.076994 | FALSE | 2.578297 | FALSE | Neuron                 |
| CCGGGTAdb/m1   | db/m | 762  | 0.017758 | FALSE | 2.512959 | FALSE | Photoreceptor          |
| CCGGTAG/db/m1  | db/m | 1726 | 0.028251 | FALSE | 1.88341  | FALSE | Endothelia Capillary E |
| CCGGTAG(db/m1  | db/m | 474  | 0.070386 | FALSE | 12.56831 | TRUE  |                        |
| CCGGTAG(db/m1  | db/m | 7559 | 0.017758 | FALSE | 0.864133 | FALSE | Photoreceptor          |
| CCGGTAG(db/m1  | db/m | 4707 | 0.070386 | FALSE | 1.122961 | FALSE | Photoreceptor          |
| CCGGTGA/db/m1  | db/m | 1298 | 0.031411 | FALSE | 1.73001  | FALSE | Pericyte               |
| CCGGTGA/db/m1  | db/m | 2870 | 0.015581 | FALSE | 1.585495 | FALSE | Photoreceptor          |
| CCGGTGA(db/m1  | db/m | 576  | 0.045165 | FALSE | 0.717717 | FALSE | Endothelia Venous EC   |
| CCGGTGAdb/m1   | db/m | 4857 | 0.031411 | FALSE | 0.966745 | FALSE | Photoreceptor          |
| CCGGTGAdb/m1   | db/m | 780  | 0.018761 | FALSE | 1.715361 | FALSE | Photoreceptor          |
| CCGTAGG(db/m1  | db/m | 1366 | 0.020536 | FALSE | 1.333958 | FALSE | Endothelia Capillary E |
| CCGTAGG(db/m1  | db/m | 2023 | 0.057037 | FALSE | 1.183286 | FALSE | Photoreceptor          |
| CCGTGAG/db/m1  | db/m | 6303 | 0.034954 | FALSE | 1.012393 | FALSE | Photoreceptor          |
| CCGTGAG(db/m1  | db/m | 907  | 0.057037 | FALSE | 1.342743 | FALSE | Photoreceptor          |
| CCGTGAG(db/m1  | db/m | 620  | 0.022455 | FALSE | 3.020293 | FALSE | Muller cell            |
| CCGTGAGdb/m1   | db/m | 2043 | 0.026796 | FALSE | 1.181127 | FALSE | Neuron                 |
| CCGTGAGdb/m1   | db/m | 2060 | 0.036891 | FALSE | 1.649834 | FALSE | Photoreceptor          |
| CCGTTCAA db/m1 | db/m | 1493 | 0.036232 | FALSE | 1.619723 | FALSE | Photoreceptor          |
| CCGTTCAA db/m1 | db/m | 707  | 0.025416 | FALSE | 2.64699  | FALSE | Microglia              |
| CCGTTCAC db/m1 | db/m | 3613 | 0.019106 | FALSE | 1.202139 | FALSE | Endothelia Capillary E |
| CCGTTCAC db/m1 | db/m | 3374 | 0.005264 | FALSE | 1.131866 | FALSE | Neuron                 |
| CCGTTCAC db/m1 | db/m | 2223 | 0.017114 | FALSE | 1.290006 | FALSE | Endothelia Capillary E |
| CCGTTCAC db/m1 | db/m | 1335 | 0.035586 | FALSE | 0.915132 | FALSE | Photoreceptor          |
| CCTAACCC db/m1 | db/m | 4697 | 0.033726 | FALSE | 1.037448 | FALSE | Endothelia Venous EC   |
| CCTAACCC db/m1 | db/m | 442  | 0.037564 | FALSE | 4.665926 | FALSE | Muller cell            |
| CCTAACCG db/m1 | db/m | 1188 | 0.049679 | FALSE | 0.966786 | FALSE | Photoreceptor          |
| CCTAACCT db/m1 | db/m | 6231 | 0.029787 | FALSE | 1.067046 | FALSE | Photoreceptor          |
| CCTAACCT db/m1 | db/m | 5562 | 0.04192  | FALSE | 1.037922 | FALSE | Endothelia Venous EC   |
| CCTAACCT db/m1 | db/m | 2544 | 0.017434 | FALSE | 1.241626 | FALSE | Endothelia Capillary E |
| CCTAACCT db/m1 | db/m | 2723 | 0.068864 | FALSE | 1.210863 | FALSE | Photoreceptor          |
| CCTAAGA/db/m1  | db/m | 6004 | 0.018088 | FALSE | 0.933822 | FALSE | Photoreceptor          |
| CCTAAGAC db/m1 | db/m | 8301 | 0.017434 | FALSE | 0.770295 | FALSE | Photoreceptor          |
| CCTAAGAC db/m1 | db/m | 941  | 0.038251 | FALSE | 2.005945 | FALSE | Photoreceptor          |
| CCTAAGAC db/m1 | db/m | 934  | 0.038251 | FALSE | 1.519578 | FALSE | Photoreceptor          |
| CCTAAGAC db/m1 | db/m | 1706 | 0.14163  | TRUE  | 4.82154  | FALSE |                        |
| CCTAAGAT db/m1 | db/m | 1258 | 0.012557 | FALSE | 1.665568 | FALSE | Pericyte               |
| CCTAAGAT db/m1 | db/m | 1885 | 0.026796 | FALSE | 2.249547 | FALSE | Endothelia Capillary E |
| CCTAAGAT db/m1 | db/m | 1362 | 0.024105 | FALSE | 0.822902 | FALSE | Photoreceptor          |

|                |      |      |          |       |          |       |                        |
|----------------|------|------|----------|-------|----------|-------|------------------------|
| CCTAAGAT db/m1 | db/m | 579  | 0.054795 | FALSE | 1.853944 | FALSE | Neuron                 |
| CCTACGTC db/m1 | db/m | 2900 | 0.078788 | FALSE | 1.457975 | FALSE | Neuron                 |
| CCTACGTC db/m1 | db/m | 1431 | 0.061912 | FALSE | 1.496907 | FALSE | Photoreceptor          |
| CCTACGTC db/m1 | db/m | 558  | 0.017434 | FALSE | 3.051265 | FALSE | Endothelia Capillary E |
| CCTACGTT db/m1 | db/m | 7052 | 0.088776 | FALSE | 0.836072 | FALSE | Photoreceptor          |
| CCTACGTT db/m1 | db/m | 693  | 0.012814 | FALSE | 1.024797 | FALSE | Photoreceptor          |
| CCTATCGA db/m1 | db/m | 1231 | 0.026328 | FALSE | 0.750079 | FALSE | Photoreceptor          |
| CCTATCGC db/m1 | db/m | 937  | 0.022857 | FALSE | 0.440288 | FALSE | Photoreceptor          |
| CCTATCGC db/m1 | db/m | 3438 | 0.025868 | FALSE | 1.157805 | FALSE | Endothelia Capillary E |
| CCTATCGC db/m1 | db/m | 2212 | 0.051646 | FALSE | 2.064171 | FALSE | Photoreceptor          |
| CCTATCGC db/m1 | db/m | 2450 | 0.016488 | FALSE | 1.17858  | FALSE | Endothelia Aterial EC  |
| CCTATCGC db/m1 | db/m | 1267 | 0.040404 | FALSE | 1.188812 | FALSE | Photoreceptor          |
| CCTATCGT db/m1 | db/m | 1933 | 0.037564 | FALSE | 1.532182 | FALSE | Photoreceptor          |
| CCTCAACA db/m1 | db/m | 7374 | 0.022857 | FALSE | 0.468584 | FALSE | Photoreceptor          |
| CCTCAACA db/m1 | db/m | 8416 | 0.030859 | FALSE | 0.930148 | FALSE | Photoreceptor          |
| CCTCAACC db/m1 | db/m | 391  | 0.055901 | FALSE | 1.339961 | FALSE | Neuron                 |
| CCTCAACC db/m1 | db/m | 1156 | 0.052669 | FALSE | 3.01189  | FALSE | Muller cell            |
| CCTCAACC db/m1 | db/m | 703  | 0.059406 | FALSE | 1.013172 | FALSE | Photoreceptor          |
| CCTCAACG db/m1 | db/m | 602  | 0.040404 | FALSE | 1.25995  | FALSE | Microglia              |
| CCTCAACG db/m1 | db/m | 764  | 0.028754 | FALSE | 1.938365 | FALSE | Endothelia Capillary E |
| CCTCAACG db/m1 | db/m | 8215 | 0.048732 | FALSE | 0.701537 | FALSE | Photoreceptor          |
| CCTCAACG db/m1 | db/m | 1152 | 0.067388 | FALSE | 2.114043 | FALSE | Photoreceptor          |
| CCTCAACT db/m1 | db/m | 1573 | 0.053718 | FALSE | 0.865878 | FALSE | Photoreceptor          |
| CCTCACAA db/m1 | db/m | 1024 | 0.018422 | FALSE | 1.608082 | FALSE | Photoreceptor          |
| CCTCACAC db/m1 | db/m | 950  | 0.055901 | FALSE | 2.517277 | FALSE | Photoreceptor          |
| CCTCACAC db/m1 | db/m | 490  | 0.034334 | FALSE | 2.632453 | FALSE | Pericyte               |
| CCTCACAT db/m1 | db/m | 805  | 0.03313  | FALSE | 1.21299  | FALSE | Photoreceptor          |
| CCTCACAT db/m1 | db/m | 1640 | 0.040404 | FALSE | 1.610321 | FALSE | Endothelia Capillary E |
| CCTCAGTA db/m1 | db/m | 6769 | 0.024534 | FALSE | 1.001366 | FALSE | Photoreceptor          |
| CCTCAGTC db/m1 | db/m | 597  | 0.026328 | FALSE | 3.117335 | FALSE | Muller cell            |
| CCTCAGTC db/m1 | db/m | 389  | 0.046906 | FALSE | 3.602446 | FALSE | Endothelia Capillary E |
| CCTCAGTC db/m1 | db/m | 789  | 0.103567 | TRUE  | 8.362677 | TRUE  |                        |
| CCTCAGTT db/m1 | db/m | 2651 | 0.003959 | FALSE | 1.007571 | FALSE | Neuron                 |
| CCTCAGTT db/m1 | db/m | 652  | 0.018761 | FALSE | 0.681495 | FALSE | Photoreceptor          |
| CCTCAGTT db/m1 | db/m | 8769 | 0.035586 | FALSE | 0.709467 | FALSE | Photoreceptor          |
| CCTCATGA db/m1 | db/m | 5225 | 0.020536 | FALSE | 0.413642 | FALSE | Photoreceptor          |
| CCTCCAAC db/m1 | db/m | 571  | 0.068864 | FALSE | 41.26528 | TRUE  |                        |
| CCTCCAAC db/m1 | db/m | 438  | 0.063221 | FALSE | 1.466337 | FALSE | Photoreceptor          |
| CCTCCAAC db/m1 | db/m | 1551 | 0.265464 | TRUE  | 1.785006 | FALSE |                        |
| CCTCCAAC db/m1 | db/m | 1239 | 0.078788 | FALSE | 1.293732 | FALSE | Photoreceptor          |
| CCTCCAAT db/m1 | db/m | 3812 | 0.040404 | FALSE | 0.946355 | FALSE | Photoreceptor          |
| CCTCCAAT db/m1 | db/m | 1056 | 0.055901 | FALSE | 2.221705 | FALSE | Photoreceptor          |
| CCTCCTCA db/m1 | db/m | 626  | 0.071958 | FALSE | 7.953604 | TRUE  |                        |
| CCTCCTCA db/m1 | db/m | 2650 | 0.063221 | FALSE | 1.503644 | FALSE | Photoreceptor          |
| CCTCCTCA db/m1 | db/m | 3157 | 0.024971 | FALSE | 0.589994 | FALSE | Photoreceptor          |
| CCTCCTCC db/m1 | db/m | 1575 | 0.088776 | FALSE | 3.298389 | FALSE | Muller cell            |
| CCTCCTCG db/m1 | db/m | 473  | 0.024971 | FALSE | 1.310645 | FALSE | Photoreceptor          |

|               |      |      |          |       |          |       |                        |
|---------------|------|------|----------|-------|----------|-------|------------------------|
| CCTCCTCTdb/m1 | db/m | 991  | 0.095727 | FALSE | 2.770502 | FALSE | Muller cell            |
| CCTCCTCTdb/m1 | db/m | 1900 | 0.028251 | FALSE | 1.83734  | FALSE | Pericyte               |
| CCTCTAGAdb/m1 | db/m | 8939 | 0.014711 | FALSE | 0.814386 | FALSE | Photoreceptor          |
| CCTCTAGCdb/m1 | db/m | 885  | 0.031973 | FALSE | 0.56718  | FALSE | Photoreceptor          |
| CCTCTAGCdb/m1 | db/m | 944  | 0.059406 | FALSE | 1.458748 | FALSE | Photoreceptor          |
| CCTCTAGTdb/m1 | db/m | 1640 | 0.012303 | FALSE | 0.770071 | FALSE | Photoreceptor          |
| CCTCTAGTdb/m1 | db/m | 2162 | 0.031973 | FALSE | 1.255816 | FALSE | Neuron                 |
| CCTCTCCAdb/m1 | db/m | 873  | 0.061912 | FALSE | 1.497005 | FALSE | Photoreceptor          |
| CCTCTCCCdb/m1 | db/m | 1427 | 0.078788 | FALSE | 2.026867 | FALSE | Photoreceptor          |
| CCTCTCCTdb/m1 | db/m | 799  | 0.093319 | FALSE | 3.781178 | FALSE | Photoreceptor          |
| CCTCTCCTdb/m1 | db/m | 626  | 0.106408 | TRUE  | 11.98257 | TRUE  |                        |
| CCTGCATCdb/m1 | db/m | 4186 | 0.024105 | FALSE | 1.088301 | FALSE | Endothelia Capillary E |
| CCTGCATTdb/m1 | db/m | 2396 | 0.005264 | FALSE | 1.459788 | FALSE | Neuron                 |
| CCTGTTGAdb/m1 | db/m | 4549 | 0.057037 | FALSE | 0.841738 | FALSE | Photoreceptor          |
| CCTGTTGCdb/m1 | db/m | 3797 | 0.17103  | TRUE  | 3.63996  | FALSE |                        |
| CCTGTTGCdb/m1 | db/m | 5449 | 0.020536 | FALSE | 0.671166 | FALSE | Photoreceptor          |
| CCTGTTGCdb/m1 | db/m | 353  | 0.035586 | FALSE | 2.409375 | FALSE | Microglia              |
| CCTGTTGTdb/m1 | db/m | 508  | 0.029787 | FALSE | 61.16505 | TRUE  |                        |
| CCTGTTGTdb/m1 | db/m | 3061 | 0.078788 | FALSE | 1.550715 | FALSE | Photoreceptor          |
| CCTGTTGTdb/m1 | db/m | 805  | 0.058205 | FALSE | 2.438066 | FALSE | Endothelia Capillary E |
| CCTGTTGTdb/m1 | db/m | 1107 | 0.068864 | FALSE | 2.533968 | FALSE | Photoreceptor          |
| CCTGTTGTdb/m1 | db/m | 2468 | 0.05065  | FALSE | 0.749147 | FALSE | Photoreceptor          |
| CCTTCAGAdb/m1 | db/m | 5059 | 0.03313  | FALSE | 1.040027 | FALSE | Endothelia Venous EC   |
| CCTTCAGAdb/m1 | db/m | 7571 | 0.012052 | FALSE | 0.824686 | FALSE | Photoreceptor          |
| CCTTCAGCdb/m1 | db/m | 2028 | 0.068864 | FALSE | 1.395694 | FALSE | Photoreceptor          |
| CCTTCAGCdb/m1 | db/m | 3009 | 0.023266 | FALSE | 1.051186 | FALSE | Endothelia Venous EC   |
| CCTTCAGCdb/m1 | db/m | 1839 | 0.049679 | FALSE | 1.16416  | FALSE | Endothelia Capillary E |
| CCTTCAGCdb/m1 | db/m | 324  | 0.048732 | FALSE | 3.354824 | FALSE | Microglia              |
| CCTTCAGCdb/m1 | db/m | 1112 | 0.015581 | FALSE | 1.872402 | FALSE | Endothelia Capillary E |
| CCTTCAGCdb/m1 | db/m | 6198 | 0.023682 | FALSE | 0.791059 | FALSE | Photoreceptor          |
| CCTTCAGTdb/m1 | db/m | 4418 | 0.088776 | FALSE | 1.32946  | FALSE | Endothelia Capillary E |
| CCTTGTGAdb/m1 | db/m | 3366 | 0.05065  | FALSE | 1.19574  | FALSE | Photoreceptor          |
| CCTTGTGAdb/m1 | db/m | 5886 | 0.044326 | FALSE | 1.06924  | FALSE | Photoreceptor          |
| CCTTGTGCdb/m1 | db/m | 871  | 0.045165 | FALSE | 4.540394 | FALSE | Muller cell            |
| CCTTGTGCdb/m1 | db/m | 665  | 0.052669 | FALSE | 3.687331 | FALSE | Muller cell            |
| CCTTGTGCdb/m1 | db/m | 544  | 0.023266 | FALSE | 3.16133  | FALSE | Muller cell            |
| CCTTGTGCdb/m1 | db/m | 554  | 0.021669 | FALSE | 0.261695 | FALSE | Photoreceptor          |
| CCTTGTGTdb/m1 | db/m | 751  | 0.05065  | FALSE | 47.60508 | TRUE  |                        |
| CGAAGGAdb/m1  | db/m | 364  | 0.059406 | FALSE | 32.48407 | TRUE  |                        |
| CGAAGGAdb/m1  | db/m | 946  | 0.071958 | FALSE | 2.091044 | FALSE | Endothelia Capillary E |
| CGAAGGAdb/m1  | db/m | 1606 | 0.024105 | FALSE | 0.811284 | FALSE | Photoreceptor          |
| CGAAGGAdb/m1  | db/m | 2049 | 0.052669 | FALSE | 1.427289 | FALSE | Photoreceptor          |
| CGAAGTTdb/m1  | db/m | 4153 | 0.037564 | FALSE | 1.038208 | FALSE | Endothelia Venous EC   |
| CGAAGTTdb/m1  | db/m | 7024 | 0.007636 | FALSE | 0.934111 | FALSE | Photoreceptor          |
| CGAAGTTdb/m1  | db/m | 7982 | 0.021286 | FALSE | 0.579994 | FALSE | Photoreceptor          |
| CGAAGTTdb/m1  | db/m | 3539 | 0.027273 | FALSE | 1.263474 | FALSE | Photoreceptor          |
| CGAAGTTdb/m1  | db/m | 675  | 0.047807 | FALSE | 1.977428 | FALSE | Microglia              |

|                |      |      |          |       |          |       |                        |
|----------------|------|------|----------|-------|----------|-------|------------------------|
| CGAAGTTT db/m1 | db/m | 1621 | 0.08663  | FALSE | 7.870837 | TRUE  |                        |
| CGAAGTTT db/m1 | db/m | 422  | 0.024534 | FALSE | 2.881063 | FALSE | Photoreceptor          |
| CGAATTG/ db/m1 | db/m | 805  | 0.125386 | TRUE  | 1.482127 | FALSE |                        |
| CGAATTG/ db/m1 | db/m | 2740 | 0.025416 | FALSE | 1.507192 | FALSE | Endothelia Capillary E |
| CGAATTG/ db/m1 | db/m | 2101 | 0.067388 | FALSE | 1.577005 | FALSE | Photoreceptor          |
| CGAATTG( db/m1 | db/m | 393  | 0.016488 | FALSE | 1.084017 | FALSE | Photoreceptor          |
| CGAATTG( db/m1 | db/m | 3319 | 0.024105 | FALSE | 1.13509  | FALSE | Endothelia Venous EC   |
| CGAATTG( db/m1 | db/m | 881  | 0.017434 | FALSE | 1.64469  | FALSE | Photoreceptor          |
| CGAATTG( db/m1 | db/m | 545  | 0.020171 | FALSE | 1.90676  | FALSE | Photoreceptor          |
| CGAATTG( db/m1 | db/m | 891  | 0.059406 | FALSE | 2.108095 | FALSE | Photoreceptor          |
| CGACAGC/ db/m1 | db/m | 1002 | 0.024105 | FALSE | 1.253993 | FALSE | Photoreceptor          |
| CGACAGC/ db/m1 | db/m | 508  | 0.016181 | FALSE | 2.062452 | FALSE | Endothelia Capillary E |
| CGACAGC( db/m1 | db/m | 1004 | 0.067388 | FALSE | 1.118352 | FALSE | Photoreceptor          |
| CGACAGC( db/m1 | db/m | 1210 | 0.021286 | FALSE | 0.834264 | FALSE | Photoreceptor          |
| CGACAGC( db/m1 | db/m | 979  | 0.120957 | TRUE  | 3.310345 | FALSE |                        |
| CGACAGC( db/m1 | db/m | 1075 | 0.036232 | FALSE | 50.43045 | TRUE  |                        |
| CGACAGC( db/m1 | db/m | 841  | 0.026796 | FALSE | 1.195197 | FALSE | Photoreceptor          |
| CGACAGC( db/m1 | db/m | 474  | 0.065957 | FALSE | 2.47772  | FALSE | Photoreceptor          |
| CGACAGC  db/m1 | db/m | 475  | 0.017758 | FALSE | 1.602445 | FALSE | Photoreceptor          |
| CGACAGC  db/m1 | db/m | 596  | 0.100845 | TRUE  | 15.36083 | TRUE  |                        |
| CGAGAAG. db/m1 | db/m | 1054 | 0.070386 | FALSE | 3.039464 | FALSE | Muller cell            |
| CGAGAAG. db/m1 | db/m | 689  | 0.122691 | TRUE  | 16.91113 | TRUE  |                        |
| CGAGAAGi db/m1 | db/m | 4720 | 0.064568 | FALSE | 1.215326 | FALSE | Photoreceptor          |
| CGAGAAGi db/m1 | db/m | 1393 | 0.025416 | FALSE | 0.876785 | FALSE | Photoreceptor          |
| CGAGAAGi db/m1 | db/m | 554  | 0.017114 | FALSE | 2.85063  | FALSE | Muller cell            |
| CGAGAAGi db/m1 | db/m | 2393 | 0.017114 | FALSE | 1.343963 | FALSE | Photoreceptor          |
| CGAGAAGi db/m1 | db/m | 925  | 0.040404 | FALSE | 1.00729  | FALSE | Photoreceptor          |
| CGAGAAGi db/m1 | db/m | 802  | 0.020908 | FALSE | 1.175522 | FALSE | Photoreceptor          |
| CGAGAAGi db/m1 | db/m | 5688 | 0.017758 | FALSE | 1.062404 | FALSE | Photoreceptor          |
| CGAGAAGi db/m1 | db/m | 739  | 0.032546 | FALSE | 1.868107 | FALSE | Photoreceptor          |
| CGAGGAA. db/m1 | db/m | 3429 | 0.032546 | FALSE | 1.176904 | FALSE | Photoreceptor          |
| CGAGGAA. db/m1 | db/m | 724  | 0.006137 | FALSE | 1.852347 | FALSE | Endothelia Capillary E |
| CGAGGAA. db/m1 | db/m | 2771 | 0.119124 | TRUE  | 6.225118 | TRUE  |                        |
| CGAGGAAi db/m1 | db/m | 6926 | 0.048732 | FALSE | 0.793528 | FALSE | Photoreceptor          |
| CGAGGAAi db/m1 | db/m | 3019 | 0.051646 | FALSE | 0.938394 | FALSE | Photoreceptor          |
| CGAGGAAi db/m1 | db/m | 1711 | 0.076994 | FALSE | 1.468193 | FALSE | Photoreceptor          |
| CGAGGCT/ db/m1 | db/m | 4071 | 0.03313  | FALSE | 1.593779 | FALSE | Photoreceptor          |
| CGAGGCT/ db/m1 | db/m | 540  | 0.04192  | FALSE | 0.448664 | FALSE | Neuron                 |
| CGAGGCT( db/m1 | db/m | 760  | 0.019106 | FALSE | 2.078803 | FALSE | Microglia              |
| CGAGGCT( db/m1 | db/m | 850  | 0.023266 | FALSE | 2.378503 | FALSE | Photoreceptor          |
| CGAGGCT( db/m1 | db/m | 9017 | 0.023682 | FALSE | 0.535715 | FALSE | Photoreceptor          |
| CGAGGCT( db/m1 | db/m | 837  | 0.014711 | FALSE | 2.408405 | FALSE | Photoreceptor          |
| CGAGGCT( db/m1 | db/m | 344  | 0.021669 | FALSE | 14.53488 | TRUE  |                        |
| CGAGTGC/ db/m1 | db/m | 1404 | 0.075259 | FALSE | 1.211301 | FALSE | Photoreceptor          |
| CGAGTGC/ db/m1 | db/m | 408  | 0.019106 | FALSE | 0.526841 | FALSE | Photoreceptor          |
| CGAGTGC/ db/m1 | db/m | 4827 | 0.159016 | TRUE  | 2.740304 | FALSE |                        |
| CGAGTGC( db/m1 | db/m | 1455 | 0.159016 | TRUE  | 20.68167 | TRUE  |                        |

|               |      |      |          |       |          |       |                        |
|---------------|------|------|----------|-------|----------|-------|------------------------|
| CGAGTGC(db/m1 | db/m | 2432 | 0.026328 | FALSE | 0.679847 | FALSE | Photoreceptor          |
| CGAGTGC(db/m1 | db/m | 399  | 0.126437 | TRUE  | 21.25655 | TRUE  |                        |
| CGAGTGC(db/m1 | db/m | 5782 | 0.146004 | TRUE  | 1.779503 | FALSE |                        |
| CGAGTGC db/m1 | db/m | 767  | 0.015287 | FALSE | 1.958594 | FALSE | Endothelia Capillary E |
| CGAGTTA db/m1 | db/m | 369  | 0.018088 | FALSE | 4.226833 | FALSE | Photoreceptor          |
| CGAGTTA db/m1 | db/m | 1460 | 0.033726 | FALSE | 1.396681 | FALSE | Photoreceptor          |
| CGAGTTA(db/m1 | db/m | 4101 | 0.054795 | FALSE | 1.706783 | FALSE | Photoreceptor          |
| CGAGTTA(db/m1 | db/m | 890  | 0.033726 | FALSE | 0.452689 | FALSE | Photoreceptor          |
| CGAGTTA(db/m1 | db/m | 897  | 0.061912 | FALSE | 1.834754 | FALSE | Photoreceptor          |
| CGAGTTA db/m1 | db/m | 1209 | 0.030318 | FALSE | 0.444923 | FALSE | Photoreceptor          |
| CGAGTTA db/m1 | db/m | 1153 | 0.04192  | FALSE | 1.830764 | FALSE | Photoreceptor          |
| CGAGTTA db/m1 | db/m | 6391 | 0.018422 | FALSE | 0.800146 | FALSE | Photoreceptor          |
| CGATCGG db/m1 | db/m | 1371 | 0.025868 | FALSE | 1.667931 | FALSE | Endothelia Venous EC   |
| CGATCGG(db/m1 | db/m | 366  | 0.037564 | FALSE | 4.395426 | FALSE | Muller cell            |
| CGATCGG(db/m1 | db/m | 2614 | 0.027758 | FALSE | 1.280331 | FALSE | Endothelia Venous EC   |
| CGATCGG(db/m1 | db/m | 5337 | 0.04192  | FALSE | 1.090431 | FALSE | Photoreceptor          |
| CGATCGG(db/m1 | db/m | 835  | 0.020171 | FALSE | 0.766534 | FALSE | Photoreceptor          |
| CGATCGG(db/m1 | db/m | 1646 | 0.030859 | FALSE | 1.169069 | FALSE | Photoreceptor          |
| CGATCGG(db/m1 | db/m | 2706 | 0.025868 | FALSE | 1.616636 | FALSE | Photoreceptor          |
| CGATCGG db/m1 | db/m | 558  | 0.015879 | FALSE | 2.22054  | FALSE | Endothelia Capillary E |
| CGATCGG db/m1 | db/m | 1544 | 0.046025 | FALSE | 1.312965 | FALSE | Photoreceptor          |
| CGATGCG db/m1 | db/m | 978  | 0.049679 | FALSE | 2.256315 | FALSE | Photoreceptor          |
| CGATGCG db/m1 | db/m | 3205 | 0.026328 | FALSE | 1.6147   | FALSE | Photoreceptor          |
| CGATGCG(db/m1 | db/m | 4367 | 0.023266 | FALSE | 1.000619 | FALSE | Photoreceptor          |
| CGATGCG db/m1 | db/m | 8481 | 0.018088 | FALSE | 0.80973  | FALSE | Photoreceptor          |
| CGATGCG db/m1 | db/m | 1973 | 0.035586 | FALSE | 1.672489 | FALSE | Photoreceptor          |
| CGATGCG db/m1 | db/m | 586  | 0.034954 | FALSE | 0.676127 | FALSE | Photoreceptor          |
| CGATGGC db/m1 | db/m | 4618 | 0.177638 | TRUE  | 6.495659 | TRUE  |                        |
| CGATGGC db/m1 | db/m | 4663 | 0.03313  | FALSE | 0.469908 | FALSE | Photoreceptor          |
| CGATGGC(db/m1 | db/m | 658  | 0.046906 | FALSE | 2.172715 | FALSE | Endothelia Capillary E |
| CGATGGC(db/m1 | db/m | 4319 | 0.018422 | FALSE | 0.976759 | FALSE | Endothelia Venous EC   |
| CGATGGC db/m1 | db/m | 1796 | 0.029787 | FALSE | 2.114499 | FALSE | Photoreceptor          |
| CGATGGC db/m1 | db/m | 1943 | 0.029266 | FALSE | 1.334072 | FALSE | Photoreceptor          |
| CGATGGC db/m1 | db/m | 2120 | 0.036232 | FALSE | 1.820484 | FALSE | Pericyte               |
| CGCAGGT db/m1 | db/m | 2962 | 0.112477 | TRUE  | 2.757407 | FALSE |                        |
| CGCAGGT db/m1 | db/m | 1209 | 0.03313  | FALSE | 0.736535 | FALSE | Photoreceptor          |
| CGCAGGT db/m1 | db/m | 3081 | 0.038953 | FALSE | 0.925115 | FALSE | Photoreceptor          |
| CGCAGGT db/m1 | db/m | 620  | 0.027273 | FALSE | 0.639223 | FALSE | Photoreceptor          |
| CGCAGGT(db/m1 | db/m | 705  | 0.044326 | FALSE | 1.984213 | FALSE | Photoreceptor          |
| CGCAGGT(db/m1 | db/m | 502  | 0.002901 | FALSE | 2.117921 | FALSE | Pericyte               |
| CGCAGGT db/m1 | db/m | 1531 | 0.047807 | FALSE | 1.114641 | FALSE | Photoreceptor          |
| CGCAGGT db/m1 | db/m | 400  | 0.016799 | FALSE | 1.562604 | FALSE | Photoreceptor          |
| CGCATAA db/m1 | db/m | 7533 | 0.148377 | TRUE  | 4.855261 | FALSE |                        |
| CGCATAA(db/m1 | db/m | 437  | 0.034334 | FALSE | 2.382498 | FALSE | Muller cell            |
| CGCATAA(db/m1 | db/m | 503  | 0.036891 | FALSE | 1.983245 | FALSE | Muller cell            |
| CGCATAA db/m1 | db/m | 6574 | 0.016488 | FALSE | 0.979874 | FALSE | Photoreceptor          |
| CGCATGG db/m1 | db/m | 7670 | 0.025868 | FALSE | 0.694902 | FALSE | Photoreceptor          |

|                |      |      |          |       |          |       |                        |
|----------------|------|------|----------|-------|----------|-------|------------------------|
| CGCATGG/db/m1  | db/m | 1159 | 0.057037 | FALSE | 1.632249 | FALSE | Photoreceptor          |
| CGCATGG/db/m1  | db/m | 3383 | 0.082569 | FALSE | 7.853653 | TRUE  |                        |
| CGCATGG/db/m1  | db/m | 1431 | 0.052669 | FALSE | 1.446915 | FALSE | Photoreceptor          |
| CGCATGG/db/m1  | db/m | 1262 | 0.018088 | FALSE | 1.857397 | FALSE | Endothelia Capillary E |
| CGCATGG/db/m1  | db/m | 1393 | 0.026796 | FALSE | 1.067168 | FALSE | Photoreceptor          |
| CGCATGG/db/m1  | db/m | 2179 | 0.060641 | FALSE | 1.55571  | FALSE | Pericyte               |
| CGCCAGA/db/m1  | db/m | 3075 | 0.011561 | FALSE | 1.264257 | FALSE | Photoreceptor          |
| CGCCAGA/db/m1  | db/m | 511  | 0.046025 | FALSE | 4.589997 | FALSE | Muller cell            |
| CGCCAGA/db/m1  | db/m | 470  | 0.018761 | FALSE | 1.257362 | FALSE | Photoreceptor          |
| CGCCAGA/db/m1  | db/m | 390  | 0.011081 | FALSE | 2.473781 | FALSE | Photoreceptor          |
| CGCCAGA/db/m1  | db/m | 400  | 0.265464 | TRUE  | 11.73554 | TRUE  |                        |
| CGCCAGA/db/m1  | db/m | 1584 | 0.042704 | FALSE | 2.030175 | FALSE | Endothelia Capillary E |
| CGCCAGA/db/m1  | db/m | 1125 | 0.042704 | FALSE | 1.387846 | FALSE | Photoreceptor          |
| CGCCAGA/db/m1  | db/m | 403  | 0.020536 | FALSE | 3.098275 | FALSE | Muller cell            |
| CGCCAGA/db/m1  | db/m | 5697 | 0.007441 | FALSE | 0.93775  | FALSE | Photoreceptor          |
| CGCCAGA/db/m1  | db/m | 607  | 0.034334 | FALSE | 3.917164 | FALSE | Muller cell            |
| CGCCATTC/db/m1 | db/m | 2653 | 0.093319 | FALSE | 1.05553  | FALSE | Photoreceptor          |
| CGCCATTC/db/m1 | db/m | 1127 | 0.033726 | FALSE | 1.837994 | FALSE | Photoreceptor          |
| CGCGTGA/db/m1  | db/m | 896  | 0.042704 | FALSE | 1.604429 | FALSE | Photoreceptor          |
| CGCGTGA/db/m1  | db/m | 5439 | 0.013605 | FALSE | 1.112297 | FALSE | Photoreceptor          |
| CGCGTGA/db/m1  | db/m | 728  | 0.015879 | FALSE | 2.458017 | FALSE | Photoreceptor          |
| CGCGTGA/db/m1  | db/m | 2245 | 0.075259 | FALSE | 1.332564 | FALSE | Photoreceptor          |
| CGCGTGA/db/m1  | db/m | 5365 | 0.007058 | FALSE | 1.065507 | FALSE | Photoreceptor          |
| CGCGTGA/db/m1  | db/m | 5166 | 0.012814 | FALSE | 0.95036  | FALSE | Photoreceptor          |
| CGCGTGA/db/m1  | db/m | 5083 | 0.034334 | FALSE | 1.017957 | FALSE | Photoreceptor          |
| CGCGTGA/db/m1  | db/m | 792  | 0.037564 | FALSE | 1.819284 | FALSE | Photoreceptor          |
| CGGAACC/db/m1  | db/m | 1226 | 0.030318 | FALSE | 0.796956 | FALSE | Photoreceptor          |
| CGGAACC/db/m1  | db/m | 725  | 0.027273 | FALSE | 2.279411 | FALSE | Endothelia Capillary E |
| CGGAACC/db/m1  | db/m | 934  | 0.038953 | FALSE | 0.810412 | FALSE | Photoreceptor          |
| CGGAACC/db/m1  | db/m | 814  | 0.055901 | FALSE | 1.894949 | FALSE | Photoreceptor          |
| CGGAACC/db/m1  | db/m | 3325 | 0.059406 | FALSE | 1.019835 | FALSE | Photoreceptor          |
| CGGAACC/db/m1  | db/m | 5380 | 0.028754 | FALSE | 0.951154 | FALSE | Photoreceptor          |
| CGGAACC/db/m1  | db/m | 9552 | 0.016488 | FALSE | 0.733232 | FALSE | Photoreceptor          |
| CGGAACC/db/m1  | db/m | 1250 | 0.026796 | FALSE | 1.405524 | FALSE | Photoreceptor          |
| CGGAACC/db/m1  | db/m | 2714 | 0.018088 | FALSE | 1.63364  | FALSE | Neuron                 |
| CGGAACC/db/m1  | db/m | 4487 | 0.034954 | FALSE | 1.278602 | FALSE | Photoreceptor          |
| CGGAATTC/db/m1 | db/m | 1950 | 0.020171 | FALSE | 1.434865 | FALSE | Endothelia Capillary E |
| CGGAATTC/db/m1 | db/m | 5810 | 0.022455 | FALSE | 1.162199 | FALSE | Photoreceptor          |
| CGGAATTC/db/m1 | db/m | 7531 | 0.010846 | FALSE | 0.842974 | FALSE | Photoreceptor          |
| CGGAATTC/db/m1 | db/m | 1249 | 0.016799 | FALSE | 1.474786 | FALSE | Endothelia Capillary E |
| CGGAATTC/db/m1 | db/m | 454  | 0.078788 | FALSE | 34.45378 | TRUE  |                        |
| CGGAATTC/db/m1 | db/m | 1145 | 0.017434 | FALSE | 0.542606 | FALSE | Photoreceptor          |
| CGGAATT/db/m1  | db/m | 903  | 0.033726 | FALSE | 0.703664 | FALSE | Photoreceptor          |
| CGGAATT/db/m1  | db/m | 397  | 0.035586 | FALSE | 2.311496 | FALSE | Photoreceptor          |
| CGGAATT/db/m1  | db/m | 991  | 0.008438 | FALSE | 2.026714 | FALSE | Endothelia Capillary E |
| CGGAATT/db/m1  | db/m | 663  | 0.020171 | FALSE | 3.742782 | FALSE | Photoreceptor          |
| CGGAATT/db/m1  | db/m | 1101 | 0.020908 | FALSE | 1.054382 | FALSE | Photoreceptor          |

|         |             |      |          |       |          |       |                        |
|---------|-------------|------|----------|-------|----------|-------|------------------------|
| CGGACAC | (db/m1 db/m | 7733 | 0.023682 | FALSE | 0.612048 | FALSE | Photoreceptor          |
| CGGACAC | (db/m1 db/m | 984  | 0.026796 | FALSE | 1.798013 | FALSE | Endothelia Venous EC   |
| CGGACAC | (db/m1 db/m | 6887 | 0.038953 | FALSE | 0.897079 | FALSE | Photoreceptor          |
| CGGACAC | (db/m1 db/m | 5391 | 0.033726 | FALSE | 1.30573  | FALSE | Photoreceptor          |
| CGGACAC | (db/m1 db/m | 1817 | 0.038953 | FALSE | 0.970669 | FALSE | Photoreceptor          |
| CGGAGAA | (db/m1 db/m | 831  | 0.026328 | FALSE | 2.494169 | FALSE | Photoreceptor          |
| CGGAGAA | (db/m1 db/m | 1654 | 0.013074 | FALSE | 1.311193 | FALSE | Endothelia Capillary E |
| CGGAGAA | (db/m1 db/m | 4368 | 0.100845 | TRUE  | 6.021925 | TRUE  |                        |
| CGGAGAA | (db/m1 db/m | 564  | 0.017434 | FALSE | 2.443455 | FALSE | Endothelia Capillary E |
| CGGAGAA | (db/m1 db/m | 938  | 0.042704 | FALSE | 1.019515 | FALSE | Photoreceptor          |
| CGGCAGT | (db/m1 db/m | 3328 | 0.011805 | FALSE | 1.091969 | FALSE | Endothelia Venous EC   |
| CGGCAGT | (db/m1 db/m | 881  | 0.044326 | FALSE | 1.769399 | FALSE | Photoreceptor          |
| CGGCAGT | (db/m1 db/m | 960  | 0.080645 | FALSE | 1.707926 | FALSE | Photoreceptor          |
| CGGCAGT | (db/m1 db/m | 1476 | 0.015879 | FALSE | 1.164047 | FALSE | Photoreceptor          |
| CGGCAGT | (db/m1 db/m | 1014 | 0.030859 | FALSE | 1.907825 | FALSE | Photoreceptor          |
| CGGCAGT | (db/m1 db/m | 502  | 0.209157 | TRUE  | 20.43423 | TRUE  |                        |
| CGGCAGT | (db/m1 db/m | 505  | 0.029266 | FALSE | 1.103853 | FALSE | Photoreceptor          |
| CGGGACT | (db/m1 db/m | 1199 | 0.042704 | FALSE | 1.421057 | FALSE | Photoreceptor          |
| CGGGACT | (db/m1 db/m | 450  | 0.018422 | FALSE | 1.346599 | FALSE | Photoreceptor          |
| CGGGACT | (db/m1 db/m | 501  | 0.024971 | FALSE | 2.468742 | FALSE | Pericyte               |
| CGGGACT | (db/m1 db/m | 2253 | 0.004116 | FALSE | 1.39563  | FALSE | Neuron                 |
| CGGGACT | (db/m1 db/m | 4330 | 0.059406 | FALSE | 1.364125 | FALSE | Photoreceptor          |
| CGGGCAT | (db/m1 db/m | 1258 | 0.023682 | FALSE | 0.58681  | FALSE | Photoreceptor          |
| CGGGCAT | (db/m1 db/m | 1149 | 0.051646 | FALSE | 1.15463  | FALSE | Photoreceptor          |
| CGGGCAT | (db/m1 db/m | 405  | 0.014151 | FALSE | 1.771991 | FALSE | Photoreceptor          |
| CGGGCAT | (db/m1 db/m | 1082 | 0.112477 | TRUE  | 13.74253 | TRUE  |                        |
| CGGGCAT | (db/m1 db/m | 8197 | 0.022455 | FALSE | 0.768681 | FALSE | Photoreceptor          |
| CGGGCAT | (db/m1 db/m | 2777 | 0.024534 | FALSE | 1.604438 | FALSE | Neuron                 |
| CGGGCAT | (db/m1 db/m | 4631 | 0.024105 | FALSE | 1.102187 | FALSE | Photoreceptor          |
| CGGGCAT | (db/m1 db/m | 8255 | 0.018088 | FALSE | 0.740502 | FALSE | Photoreceptor          |
| CGGGCAT | (db/m1 db/m | 446  | 0.014151 | FALSE | 4.023685 | FALSE | Muller cell            |
| CGGGCAT | (db/m1 db/m | 863  | 0.047807 | FALSE | 1.652431 | FALSE | Photoreceptor          |
| CGGGCAT | (db/m1 db/m | 6046 | 0.009277 | FALSE | 1.046848 | FALSE | Photoreceptor          |
| CGGGTCA | (db/m1 db/m | 2022 | 0.057037 | FALSE | 1.261228 | FALSE | Neuron                 |
| CGGGTCA | (db/m1 db/m | 811  | 0.068864 | FALSE | 7.072368 | TRUE  |                        |
| CGGGTCA | (db/m1 db/m | 3560 | 0.044326 | FALSE | 1.308238 | FALSE | Endothelia Venous EC   |
| CGGGTCA | (db/m1 db/m | 1352 | 0.016799 | FALSE | 2.434619 | FALSE | Endothelia Capillary E |
| CGGGTCA | (db/m1 db/m | 477  | 0.08663  | FALSE | 16.21622 | TRUE  |                        |
| CGGGTCA | (db/m1 db/m | 1116 | 0.026328 | FALSE | 0.75593  | FALSE | Photoreceptor          |
| CGGGTCA | (db/m1 db/m | 3263 | 0.164835 | TRUE  | 3.165772 | FALSE |                        |
| CGGGTGT | (db/m1 db/m | 3655 | 0.019455 | FALSE | 1.051095 | FALSE | Endothelia Venous EC   |
| CGGGTGT | (db/m1 db/m | 490  | 0.054795 | FALSE | 1.847409 | FALSE | Photoreceptor          |
| CGGGTGT | (db/m1 db/m | 3317 | 0.047807 | FALSE | 1.013271 | FALSE | Photoreceptor          |
| CGGGTGT | (db/m1 db/m | 1570 | 0.058205 | FALSE | 1.98375  | FALSE | Photoreceptor          |
| CGGGTGT | (db/m1 db/m | 817  | 0.026796 | FALSE | 2.252406 | FALSE | Endothelia Capillary E |
| CGGTCAG | (db/m1 db/m | 990  | 0.058205 | FALSE | 37.92224 | TRUE  |                        |
| CGGTCAG | (db/m1 db/m | 711  | 0.014151 | FALSE | 1.538355 | FALSE | Microglia              |

|                |      |      |          |       |          |       |                        |
|----------------|------|------|----------|-------|----------|-------|------------------------|
| CGGTCAGC db/m1 | db/m | 591  | 0.025868 | FALSE | 1.013223 | FALSE | Endothelia Capillary E |
| CGGTCAGC db/m1 | db/m | 2252 | 0.014429 | FALSE | 1.070402 | FALSE | Endothelia Capillary E |
| CGGTCAGC db/m1 | db/m | 637  | 0.043505 | FALSE | 2.620543 | FALSE | Pericyte               |
| CGGTCAGC db/m1 | db/m | 2733 | 0.009493 | FALSE | 1.289435 | FALSE | Photoreceptor          |
| CGGTCAGC db/m1 | db/m | 1845 | 0.027273 | FALSE | 1.22156  | FALSE | Photoreceptor          |
| CGGTCAGT db/m1 | db/m | 588  | 0.024105 | FALSE | 2.728557 | FALSE | Muller cell            |
| CGGTCAGT db/m1 | db/m | 1985 | 0.049679 | FALSE | 1.203842 | FALSE | Muller cell            |
| CGGTCAGT db/m1 | db/m | 1118 | 0.042704 | FALSE | 2.178483 | FALSE | Photoreceptor          |
| CGTAAGTC db/m1 | db/m | 715  | 0.064568 | FALSE | 9.27928  | TRUE  |                        |
| CGTAAGTC db/m1 | db/m | 456  | 0.049679 | FALSE | 53.84616 | TRUE  |                        |
| CGTAAGTC db/m1 | db/m | 3924 | 0.022059 | FALSE | 0.686302 | FALSE | Photoreceptor          |
| CGTAAGTC db/m1 | db/m | 1010 | 0.030859 | FALSE | 1.205391 | FALSE | Photoreceptor          |
| CGTAAGTC db/m1 | db/m | 1151 | 0.030859 | FALSE | 1.96066  | FALSE | Endothelia Capillary E |
| CGTAAGTT db/m1 | db/m | 3928 | 0.252153 | TRUE  | 6.164458 | TRUE  |                        |
| CGTAAGTT db/m1 | db/m | 2179 | 0.042704 | FALSE | 1.421671 | FALSE | Photoreceptor          |
| CGTAATG/ db/m1 | db/m | 845  | 0.052669 | FALSE | 0.818655 | FALSE | Photoreceptor          |
| CGTAATG/ db/m1 | db/m | 1980 | 0.041154 | FALSE | 1.361556 | FALSE | Photoreceptor          |
| CGTAATG/ db/m1 | db/m | 5749 | 0.016799 | FALSE | 0.713052 | FALSE | Photoreceptor          |
| CGTAATGC db/m1 | db/m | 827  | 0.13452  | TRUE  | 6.212304 | TRUE  |                        |
| CGTAATGC db/m1 | db/m | 3137 | 0.058205 | FALSE | 1.199807 | FALSE | Photoreceptor          |
| CGTAATGT db/m1 | db/m | 1777 | 0.04192  | FALSE | 1.728266 | FALSE | Photoreceptor          |
| CGTAGTA/ db/m1 | db/m | 681  | 0.040404 | FALSE | 1.078711 | FALSE | Photoreceptor          |
| CGTAGTAC db/m1 | db/m | 3899 | 0.022857 | FALSE | 1.112018 | FALSE | Photoreceptor          |
| CGTAGTAC db/m1 | db/m | 1627 | 0.08663  | FALSE | 2.022456 | FALSE | Photoreceptor          |
| CGTAGTAT db/m1 | db/m | 1208 | 0.055901 | FALSE | 1.613398 | FALSE | Photoreceptor          |
| CGTAGTAT db/m1 | db/m | 1029 | 0.044326 | FALSE | 3.703395 | FALSE | Muller cell            |
| CGTCAAA/ db/m1 | db/m | 889  | 0.030318 | FALSE | 2.441538 | FALSE | Photoreceptor          |
| CGTCAAA/ db/m1 | db/m | 7103 | 0.025416 | FALSE | 1.103422 | FALSE | Photoreceptor          |
| CGTCAAA/ db/m1 | db/m | 1116 | 0.039671 | FALSE | 2.043546 | FALSE | Photoreceptor          |
| CGTCAAA/ db/m1 | db/m | 1212 | 0.084562 | FALSE | 24.71214 | TRUE  |                        |
| CGTCAAA/ db/m1 | db/m | 354  | 0.080645 | FALSE | 3.47148  | FALSE | Muller cell            |
| CGTCAAA/ db/m1 | db/m | 4285 | 0.046906 | FALSE | 1.106767 | FALSE | Photoreceptor          |
| CGTCCATA db/m1 | db/m | 755  | 0.051646 | FALSE | 0.984078 | FALSE | Photoreceptor          |
| CGTCCATC db/m1 | db/m | 3824 | 0.027273 | FALSE | 1.181055 | FALSE | Photoreceptor          |
| CGTCCATC db/m1 | db/m | 3014 | 0.032546 | FALSE | 1.086496 | FALSE | Photoreceptor          |
| CGTCCATC db/m1 | db/m | 2888 | 0.010157 | FALSE | 1.454588 | FALSE | Photoreceptor          |
| CGTCCATT db/m1 | db/m | 399  | 0.021286 | FALSE | 1.711418 | FALSE | Photoreceptor          |
| CGTCCATT db/m1 | db/m | 1752 | 0.095727 | FALSE | 1.719208 | FALSE | Endothelia Capillary E |
| CGTCCATT db/m1 | db/m | 538  | 0.043505 | FALSE | 4.111472 | FALSE | Muller cell            |
| CGTGAAT/ db/m1 | db/m | 384  | 0.076994 | FALSE | 3.513734 | FALSE | Photoreceptor          |
| CGTGAAT/ db/m1 | db/m | 716  | 0.025868 | FALSE | 2.677182 | FALSE | Endothelia Capillary E |
| CGTGAAT/ db/m1 | db/m | 2473 | 0.025868 | FALSE | 0.780245 | FALSE | Photoreceptor          |
| CGTGAAT/ db/m1 | db/m | 1118 | 0.060641 | FALSE | 1.265507 | FALSE | Photoreceptor          |
| CGTGAATT db/m1 | db/m | 682  | 0.009933 | FALSE | 2.978347 | FALSE | Endothelia Capillary E |
| CGTGATAC db/m1 | db/m | 4629 | 0.017434 | FALSE | 0.848332 | FALSE | Photoreceptor          |
| CGTGATA/ db/m1 | db/m | 1024 | 0.051646 | FALSE | 3.197652 | FALSE | Neuron                 |
| CGTGATA/ db/m1 | db/m | 708  | 0.015287 | FALSE | 1.382796 | FALSE | Photoreceptor          |



|                 |      |      |          |       |          |       |                        |
|-----------------|------|------|----------|-------|----------|-------|------------------------|
| CGTGATAI db/m1  | db/m | 525  | 0.006137 | FALSE | 2.213866 | FALSE | Endothelia Capillary E |
| CGTGCTTA db/m1  | db/m | 538  | 0.05065  | FALSE | 5.419355 | TRUE  |                        |
| CGTGCTTG db/m1  | db/m | 1187 | 0.014429 | FALSE | 2.254004 | FALSE | Pericyte               |
| CGTGCTTG db/m1  | db/m | 1614 | 0.051646 | FALSE | 1.801122 | FALSE | Photoreceptor          |
| CGTGCTTG db/m1  | db/m | 613  | 0.027758 | FALSE | 1.473119 | FALSE | Photoreceptor          |
| CGTGCTTT db/m1  | db/m | 414  | 0.065957 | FALSE | 3.873489 | FALSE | Photoreceptor          |
| CGTGCTTT db/m1  | db/m | 7051 | 0.007249 | FALSE | 0.92543  | FALSE | Photoreceptor          |
| CGTGCTTT db/m1  | db/m | 404  | 0.039671 | FALSE | 1.876955 | FALSE | Photoreceptor          |
| CGTGTCTA db/m1  | db/m | 6200 | 0.012814 | FALSE | 1.047505 | FALSE | Photoreceptor          |
| CGTGTCTA db/m1  | db/m | 3751 | 0.014711 | FALSE | 1.154413 | FALSE | Endothelia Venous EC   |
| CGTGTCTC db/m1  | db/m | 2346 | 0.044326 | FALSE | 1.002715 | FALSE | Photoreceptor          |
| CGTGTCTC db/m1  | db/m | 3015 | 0.014997 | FALSE | 1.294202 | FALSE | Photoreceptor          |
| CGTGTCTC db/m1  | db/m | 3899 | 0.016488 | FALSE | 1.134662 | FALSE | Photoreceptor          |
| CGTGTCTT db/m1  | db/m | 2165 | 0.063221 | FALSE | 1.286242 | FALSE | Neuron                 |
| CGTTAGA/ db/m1  | db/m | 1170 | 0.018088 | FALSE | 1.916125 | FALSE | Endothelia Capillary E |
| CGTTAGA/ db/m1  | db/m | 1911 | 0.049679 | FALSE | 1.85752  | FALSE | Endothelia Venous EC   |
| CGTTAGAC db/m1  | db/m | 898  | 0.068864 | FALSE | 32.33044 | TRUE  |                        |
| CGTTAGAC db/m1  | db/m | 646  | 0.057037 | FALSE | 44.14825 | TRUE  |                        |
| CGTTAGAC db/m1  | db/m | 715  | 0.030859 | FALSE | 1.674751 | FALSE | Photoreceptor          |
| CGTTAGAC db/m1  | db/m | 7287 | 0.012557 | FALSE | 0.817675 | FALSE | Photoreceptor          |
| CGTTAGAT db/m1  | db/m | 1051 | 0.052669 | FALSE | 1.527275 | FALSE | Photoreceptor          |
| CGTTCTGA db/m1  | db/m | 2281 | 0.049679 | FALSE | 1.990514 | FALSE | Photoreceptor          |
| CGTTCTGC db/m1  | db/m | 1142 | 0.057037 | FALSE | 1.98719  | FALSE | Photoreceptor          |
| CGTTCTGC db/m1  | db/m | 6312 | 0.012052 | FALSE | 0.949406 | FALSE | Photoreceptor          |
| CGTTGGG/ db/m1  | db/m | 1129 | 0.006317 | FALSE | 1.12035  | FALSE | Endothelia Capillary E |
| CGTTGGG( db/m1  | db/m | 653  | 0.091004 | FALSE | 3.682752 | FALSE | Endothelia Aterial EC  |
| CGTTGGG  db/m1  | db/m | 1843 | 0.054795 | FALSE | 1.720344 | FALSE | Photoreceptor          |
| CGTTGGG  db/m1  | db/m | 5266 | 0.016181 | FALSE | 1.049719 | FALSE | Photoreceptor          |
| CTAACCCA db/m1  | db/m | 511  | 0.070386 | FALSE | 2.512536 | FALSE | Neuron                 |
| CTAACCCA db/m1  | db/m | 6377 | 0.018761 | FALSE | 1.13237  | FALSE | Photoreceptor          |
| CTAACCCA db/m1  | db/m | 5695 | 0.063221 | FALSE | 0.691666 | FALSE | Photoreceptor          |
| CTAACCCA db/m1  | db/m | 663  | 0.034954 | FALSE | 3.766547 | FALSE | Muller cell            |
| CTAACCCC db/m1  | db/m | 1096 | 0.022455 | FALSE | 1.408133 | FALSE | Photoreceptor          |
| CTAACCCG db/m1  | db/m | 946  | 0.044326 | FALSE | 1.490414 | FALSE | Photoreceptor          |
| CTAACCCCT db/m1 | db/m | 1572 | 0.028251 | FALSE | 1.665278 | FALSE | Endothelia Capillary E |
| CTAACCCCT db/m1 | db/m | 7338 | 0.026328 | FALSE | 0.771613 | FALSE | Photoreceptor          |
| CTAACTTC db/m1  | db/m | 605  | 0.022455 | FALSE | 2.872506 | FALSE | Photoreceptor          |
| CTAACTTC db/m1  | db/m | 2790 | 0.084562 | FALSE | 2.32659  | FALSE | Muller cell            |
| CTAACTTT db/m1  | db/m | 397  | 0.036232 | FALSE | 11.09123 | TRUE  |                        |
| CTAAGTG/ db/m1  | db/m | 1274 | 0.048732 | FALSE | 1.496779 | FALSE | Photoreceptor          |
| CTAAGTG( db/m1  | db/m | 6185 | 0.04192  | FALSE | 0.913608 | FALSE | Photoreceptor          |
| CTAAGTG  db/m1  | db/m | 1214 | 0.017758 | FALSE | 0.575188 | FALSE | Photoreceptor          |
| CTAAGTG  db/m1  | db/m | 1945 | 0.061912 | FALSE | 5.153204 | TRUE  |                        |
| CTAAGTG  db/m1  | db/m | 1175 | 0.012303 | FALSE | 1.878533 | FALSE | Endothelia Capillary E |
| CTACAGA/ db/m1  | db/m | 1540 | 0.043505 | FALSE | 0.914837 | FALSE | Photoreceptor          |
| CTACAGAC db/m1  | db/m | 972  | 0.046025 | FALSE | 1.578779 | FALSE | Photoreceptor          |
| CTACAGAC db/m1  | db/m | 337  | 0.060641 | FALSE | 19.7318  | TRUE  |                        |

|                |      |      |          |       |          |       |                        |
|----------------|------|------|----------|-------|----------|-------|------------------------|
| CTACAGAC db/m1 | db/m | 725  | 0.039671 | FALSE | 1.793314 | FALSE | Photoreceptor          |
| CTACAGAC db/m1 | db/m | 767  | 0.024534 | FALSE | 1.024289 | FALSE | Photoreceptor          |
| CTACAGAT db/m1 | db/m | 1976 | 0.031411 | FALSE | 0.902577 | FALSE | Photoreceptor          |
| CTACATTA db/m1 | db/m | 2970 | 0.00687  | FALSE | 1.256672 | FALSE | Neuron                 |
| CTACATTC db/m1 | db/m | 757  | 0.063221 | FALSE | 0.704273 | FALSE | Photoreceptor          |
| CTACATTC db/m1 | db/m | 886  | 0.019106 | FALSE | 1.605807 | FALSE | Neuron                 |
| CTACATTG db/m1 | db/m | 364  | 0.106646 | TRUE  | 1.326633 | FALSE |                        |
| CTACATTG db/m1 | db/m | 3569 | 0.017114 | FALSE | 1.036308 | FALSE | Endothelia Capillary E |
| CTACATTG db/m1 | db/m | 3253 | 0.026328 | FALSE | 1.391026 | FALSE | Endothelia Venous EC   |
| CTACATTG db/m1 | db/m | 2887 | 0.026796 | FALSE | 1.479532 | FALSE | Endothelia Venous EC   |
| CTACATTT db/m1 | db/m | 1702 | 0.017758 | FALSE | 1.507825 | FALSE | Photoreceptor          |
| CTACCCAG db/m1 | db/m | 3084 | 0.030318 | FALSE | 1.237371 | FALSE | Photoreceptor          |
| CTACCCAG db/m1 | db/m | 4169 | 0.048732 | FALSE | 1.264737 | FALSE | Photoreceptor          |
| CTACCCAT db/m1 | db/m | 1414 | 0.112477 | TRUE  | 24.77642 | TRUE  |                        |
| CTACCCAT db/m1 | db/m | 7397 | 0.042704 | FALSE | 0.822008 | FALSE | Photoreceptor          |
| CTACCTGA db/m1 | db/m | 5787 | 0.046025 | FALSE | 1.114349 | FALSE | Photoreceptor          |
| CTACCTGC db/m1 | db/m | 3432 | 0.038953 | FALSE | 0.811347 | FALSE | Photoreceptor          |
| CTACCTGC db/m1 | db/m | 2364 | 0.030318 | FALSE | 1.415159 | FALSE | Pericyte               |
| CTACGGG db/m1  | db/m | 1166 | 0.012557 | FALSE | 1.393743 | FALSE | Photoreceptor          |
| CTACGGG db/m1  | db/m | 501  | 0.041154 | FALSE | 1.15081  | FALSE | Photoreceptor          |
| CTACGGG db/m1  | db/m | 3223 | 0.023682 | FALSE | 1.123894 | FALSE | Endothelia Capillary E |
| CTACGGG db/m1  | db/m | 4236 | 0.038251 | FALSE | 1.08997  | FALSE | Photoreceptor          |
| CTACGGG db/m1  | db/m | 1916 | 0.047807 | FALSE | 1.599872 | FALSE | Photoreceptor          |
| CTACGGG db/m1  | db/m | 4597 | 0.148377 | TRUE  | 4.099653 | FALSE |                        |
| CTACGGG db/m1  | db/m | 2691 | 0.009712 | FALSE | 1.15485  | FALSE | Endothelia Capillary E |
| CTACTATA db/m1 | db/m | 1651 | 0.030859 | FALSE | 1.476488 | FALSE | Photoreceptor          |
| CTACTATG db/m1 | db/m | 2932 | 0.031411 | FALSE | 1.251833 | FALSE | Neuron                 |
| CTACTATG db/m1 | db/m | 5299 | 0.027273 | FALSE | 1.18906  | FALSE | Photoreceptor          |
| CTACTATG db/m1 | db/m | 2101 | 0.022455 | FALSE | 1.469932 | FALSE | Endothelia Capillary E |
| CTACTATT db/m1 | db/m | 4420 | 0.018088 | FALSE | 0.66019  | FALSE | Photoreceptor          |
| CTAGACA db/m1  | db/m | 3497 | 0.014151 | FALSE | 1.078744 | FALSE | Photoreceptor          |
| CTAGACA db/m1  | db/m | 8618 | 0.032546 | FALSE | 0.734959 | FALSE | Photoreceptor          |
| CTAGGTA db/m1  | db/m | 7455 | 0.025416 | FALSE | 0.759338 | FALSE | Photoreceptor          |
| CTAGGTA db/m1  | db/m | 744  | 0.138889 | TRUE  | 10.20036 | TRUE  |                        |
| CTAGGTA db/m1  | db/m | 4424 | 0.296296 | TRUE  | 4.426778 | FALSE |                        |
| CTAGGTAC db/m1 | db/m | 1420 | 0.049679 | FALSE | 2.185818 | FALSE | Photoreceptor          |
| CTAGGTAC db/m1 | db/m | 684  | 0.018761 | FALSE | 2.35772  | FALSE | Photoreceptor          |
| CTAGGTAT db/m1 | db/m | 3406 | 0.031973 | FALSE | 0.883265 | FALSE | Photoreceptor          |
| CTATAGG db/m1  | db/m | 5250 | 0.024534 | FALSE | 0.493854 | FALSE | Photoreceptor          |
| CTATAGG db/m1  | db/m | 1878 | 0.068864 | FALSE | 1.052869 | FALSE | Photoreceptor          |
| CTATCCGA db/m1 | db/m | 1605 | 0.031973 | FALSE | 1.745188 | FALSE | Photoreceptor          |
| CTATCCGA db/m1 | db/m | 739  | 0.138889 | TRUE  | 1.99637  | FALSE |                        |
| CTATCCGA db/m1 | db/m | 2446 | 0.041154 | FALSE | 1.464468 | FALSE | Endothelia Capillary E |
| CTATCCGC db/m1 | db/m | 2611 | 0.005435 | FALSE | 1.150674 | FALSE | Neuron                 |
| CTATCCGC db/m1 | db/m | 934  | 0.073582 | FALSE | 3.705304 | FALSE | Muller cell            |
| CTATCCGC db/m1 | db/m | 5836 | 0.008438 | FALSE | 0.97319  | FALSE | Photoreceptor          |
| CTATCCGT db/m1 | db/m | 925  | 0.039671 | FALSE | 1.640315 | FALSE | Photoreceptor          |

|                |      |      |          |       |          |       |                        |
|----------------|------|------|----------|-------|----------|-------|------------------------|
| CTATCCGT db/m1 | db/m | 3278 | 0.053718 | FALSE | 1.094741 | FALSE | Endothelia Venous EC   |
| CTATCTAA db/m1 | db/m | 1108 | 0.067388 | FALSE | 1.536772 | FALSE | Photoreceptor          |
| CTATCTAA db/m1 | db/m | 2271 | 0.023682 | FALSE | 1.459286 | FALSE | Endothelia Aterial EC  |
| CTATCTAC db/m1 | db/m | 2287 | 0.05065  | FALSE | 1.631372 | FALSE | Endothelia Capillary E |
| CTATCTAC db/m1 | db/m | 896  | 0.014429 | FALSE | 2.610286 | FALSE | Endothelia Capillary E |
| CTATCTAC db/m1 | db/m | 1036 | 0.015581 | FALSE | 0.619756 | FALSE | Photoreceptor          |
| CTATCTAG db/m1 | db/m | 789  | 0.05065  | FALSE | 2.280398 | FALSE | Photoreceptor          |
| CTATCTAT db/m1 | db/m | 3335 | 0.010846 | FALSE | 1.49022  | FALSE | Photoreceptor          |
| CTATCTAT db/m1 | db/m | 2252 | 0.04192  | FALSE | 0.707696 | FALSE | Photoreceptor          |
| CTCAACCA db/m1 | db/m | 2108 | 0.008032 | FALSE | 1.260135 | FALSE | Photoreceptor          |
| CTCAACCA db/m1 | db/m | 403  | 0.018422 | FALSE | 0.845172 | FALSE | Photoreceptor          |
| CTCAACCA db/m1 | db/m | 1777 | 0.027273 | FALSE | 1.032461 | FALSE | Endothelia Capillary E |
| CTCAACCC db/m1 | db/m | 461  | 0.017758 | FALSE | 1.398746 | FALSE | Photoreceptor          |
| CTCAACCC db/m1 | db/m | 2114 | 0.011319 | FALSE | 0.849111 | FALSE | Neuron                 |
| CTCAACCG db/m1 | db/m | 923  | 0.039671 | FALSE | 56.1922  | TRUE  |                        |
| CTCAACCG db/m1 | db/m | 759  | 0.058205 | FALSE | 1.777556 | FALSE | Photoreceptor          |
| CTCAACCG db/m1 | db/m | 548  | 0.063221 | FALSE | 2.222631 | FALSE | Endothelia Capillary E |
| CTCAAGA db/m1  | db/m | 399  | 0.026328 | FALSE | 0.612666 | FALSE | Photoreceptor          |
| CTCAAGAC db/m1 | db/m | 1934 | 0.022059 | FALSE | 0.436165 | FALSE | Photoreceptor          |
| CTCAAGAC db/m1 | db/m | 820  | 0.013338 | FALSE | 1.016363 | FALSE | Photoreceptor          |
| CTCAAGAT db/m1 | db/m | 2000 | 0.036891 | FALSE | 1.183735 | FALSE | Photoreceptor          |
| CTCAAGAT db/m1 | db/m | 641  | 0.018422 | FALSE | 2.119709 | FALSE | Endothelia Capillary E |
| CTCAATTA db/m1 | db/m | 3953 | 0.091004 | FALSE | 1.386177 | FALSE | Neuron                 |
| CTCAATTT db/m1 | db/m | 3043 | 0.057037 | FALSE | 1.913685 | FALSE | Neuron                 |
| CTCAATTT db/m1 | db/m | 390  | 0.028754 | FALSE | 2.234941 | FALSE | Photoreceptor          |
| CTCAATTT db/m1 | db/m | 6071 | 0.024105 | FALSE | 0.917131 | FALSE | Endothelia Venous EC   |
| CTCACTGA db/m1 | db/m | 8025 | 0.064568 | FALSE | 0.666562 | FALSE | Photoreceptor          |
| CTCACTGC db/m1 | db/m | 4833 | 0.280108 | TRUE  | 5.172825 | TRUE  |                        |
| CTCACTGG db/m1 | db/m | 427  | 0.046025 | FALSE | 21.03064 | TRUE  |                        |
| CTCACTGG db/m1 | db/m | 871  | 0.033726 | FALSE | 2.164992 | FALSE | Photoreceptor          |
| CTCACTGG db/m1 | db/m | 2701 | 0.084562 | FALSE | 6.624606 | TRUE  |                        |
| CTCACTGT db/m1 | db/m | 2121 | 0.064568 | FALSE | 16.08649 | TRUE  |                        |
| CTCACTGT db/m1 | db/m | 2080 | 0.020908 | FALSE | 1.418934 | FALSE | Endothelia Capillary E |
| CTCACTGT db/m1 | db/m | 682  | 0.065957 | FALSE | 1.454235 | FALSE | Photoreceptor          |
| CTCACTGT db/m1 | db/m | 3550 | 0.011319 | FALSE | 1.11876  | FALSE | Endothelia Aterial EC  |
| CTCAGAA db/m1  | db/m | 1057 | 0.071958 | FALSE | 1.021385 | FALSE | Photoreceptor          |
| CTCAGAA db/m1  | db/m | 738  | 0.067388 | FALSE | 4.279664 | FALSE | Muller cell            |
| CTCAGAA db/m1  | db/m | 2836 | 0.014151 | FALSE | 1.086984 | FALSE | Endothelia Capillary E |
| CTCAGAAC db/m1 | db/m | 488  | 0.049679 | FALSE | 1.877038 | FALSE | Photoreceptor          |
| CTCAGAAC db/m1 | db/m | 668  | 0.098234 | FALSE | 44.77064 | TRUE  |                        |
| CTCAGAAC db/m1 | db/m | 1887 | 0.080645 | FALSE | 0.94659  | FALSE | Photoreceptor          |
| CTCAGAAC db/m1 | db/m | 745  | 0.067388 | FALSE | 2.103802 | FALSE | Photoreceptor          |
| CTCAGAA db/m1  | db/m | 684  | 0.046025 | FALSE | 4.043572 | FALSE | Muller cell            |
| CTCAGAA db/m1  | db/m | 3766 | 0.055901 | FALSE | 1.512754 | FALSE | Photoreceptor          |
| CTCAGAA db/m1  | db/m | 1270 | 0.023266 | FALSE | 0.723815 | FALSE | Photoreceptor          |
| CTCAGGG db/m1  | db/m | 457  | 0.033726 | FALSE | 1.068889 | FALSE | Photoreceptor          |
| CTCAGGG db/m1  | db/m | 473  | 0.01981  | FALSE | 1.244588 | FALSE | Photoreceptor          |

|                |      |      |          |       |          |       |                        |
|----------------|------|------|----------|-------|----------|-------|------------------------|
| CTCAGGG(db/m1  | db/m | 460  | 0.021669 | FALSE | 1.306997 | FALSE | Photoreceptor          |
| CTCAGGG(db/m1  | db/m | 6976 | 0.038251 | FALSE | 0.877419 | FALSE | Photoreceptor          |
| CTCAGTCA db/m1 | db/m | 432  | 0.009493 | FALSE | 0.650653 | FALSE | Photoreceptor          |
| CTCAGTCA db/m1 | db/m | 2354 | 0.058205 | FALSE | 2.261479 | FALSE | Muller cell            |
| CTCAGTCA db/m1 | db/m | 832  | 0.028251 | FALSE | 2.021938 | FALSE | Photoreceptor          |
| CTCAGTCC db/m1 | db/m | 665  | 0.05065  | FALSE | 1.118524 | FALSE | Photoreceptor          |
| CTCAGTCC db/m1 | db/m | 1735 | 0.048732 | FALSE | 0.994106 | FALSE | Photoreceptor          |
| CTCAGTCC db/m1 | db/m | 4897 | 0.058205 | FALSE | 0.972976 | FALSE | Photoreceptor          |
| CTCAGTCC db/m1 | db/m | 531  | 0.098234 | FALSE | 4.562733 | FALSE | Photoreceptor          |
| CTCAGTCC db/m1 | db/m | 796  | 0.034954 | FALSE | 2.766359 | FALSE | Pericyte               |
| CTCAGTCT db/m1 | db/m | 494  | 0.032546 | FALSE | 0.864655 | FALSE | Pericyte               |
| CTCAGTCT db/m1 | db/m | 7310 | 0.025416 | FALSE | 0.824236 | FALSE | Photoreceptor          |
| CTCATCGG db/m1 | db/m | 3992 | 0.027273 | FALSE | 1.127895 | FALSE | Photoreceptor          |
| CTCATCGT db/m1 | db/m | 2711 | 0.034334 | FALSE | 1.384426 | FALSE | Endothelia Venous EC   |
| CTCATCGT db/m1 | db/m | 1156 | 0.054795 | FALSE | 1.213323 | FALSE | Photoreceptor          |
| CTCATGCA db/m1 | db/m | 563  | 0.068864 | FALSE | 1.976585 | FALSE | Photoreceptor          |
| CTCATGCA db/m1 | db/m | 5821 | 0.022857 | FALSE | 0.856661 | FALSE | Photoreceptor          |
| CTCATGCC db/m1 | db/m | 4390 | 0.014997 | FALSE | 0.720327 | FALSE | Neuron                 |
| CTCATGCT db/m1 | db/m | 382  | 0.034334 | FALSE | 3.553806 | FALSE | Muller cell            |
| CTCATGCT db/m1 | db/m | 347  | 0.036891 | FALSE | 4.258949 | FALSE | Muller cell            |
| CTCATTAA db/m1 | db/m | 2007 | 0.046025 | FALSE | 1.274433 | FALSE | Photoreceptor          |
| CTCATTAA db/m1 | db/m | 471  | 0.033726 | FALSE | 0.66585  | FALSE | Photoreceptor          |
| CTCATTAC db/m1 | db/m | 1209 | 0.008438 | FALSE | 1.335983 | FALSE | Endothelia Capillary E |
| CTCATTAG db/m1 | db/m | 906  | 0.078788 | FALSE | 1.778653 | FALSE | Photoreceptor          |
| CTCATTAT db/m1 | db/m | 3675 | 0.025416 | FALSE | 1.348927 | FALSE | Photoreceptor          |
| CTCATTAT db/m1 | db/m | 4359 | 0.026328 | FALSE | 1.111218 | FALSE | Photoreceptor          |
| CTCATTAT db/m1 | db/m | 5764 | 0.042704 | FALSE | 1.223659 | FALSE | Photoreceptor          |
| CTCATTAT db/m1 | db/m | 2685 | 0.045165 | FALSE | 1.351673 | FALSE | Endothelia Venous EC   |
| CTCCAACA db/m1 | db/m | 1660 | 0.019106 | FALSE | 1.148782 | FALSE | Photoreceptor          |
| CTCCAACA db/m1 | db/m | 2979 | 0.028754 | FALSE | 0.494802 | FALSE | Photoreceptor          |
| CTCCAACA db/m1 | db/m | 7343 | 0.184701 | TRUE  | 2.177924 | FALSE |                        |
| CTCCAACC db/m1 | db/m | 3550 | 0.04192  | FALSE | 0.841804 | FALSE | Photoreceptor          |
| CTCCAACC db/m1 | db/m | 1441 | 0.040404 | FALSE | 0.672945 | FALSE | Photoreceptor          |
| CTCCAACG db/m1 | db/m | 3189 | 0.073582 | FALSE | 1.281946 | FALSE | Photoreceptor          |
| CTCCAACG db/m1 | db/m | 5278 | 0.073582 | FALSE | 1.205616 | FALSE | Neuron                 |
| CTCCACAA db/m1 | db/m | 3064 | 0.029787 | FALSE | 1.725795 | FALSE | Photoreceptor          |
| CTCCACAA db/m1 | db/m | 1637 | 0.080645 | FALSE | 1.100658 | FALSE | Photoreceptor          |
| CTCCACAC db/m1 | db/m | 950  | 0.031973 | FALSE | 1.178015 | FALSE | Photoreceptor          |
| CTCCACAG db/m1 | db/m | 6826 | 0.008032 | FALSE | 0.896292 | FALSE | Photoreceptor          |
| CTCCATGA db/m1 | db/m | 1413 | 0.029787 | FALSE | 1.243191 | FALSE | Neuron                 |
| CTCCATGA db/m1 | db/m | 949  | 0.018422 | FALSE | 0.87569  | FALSE | Photoreceptor          |
| CTCCATGC db/m1 | db/m | 1089 | 0.060641 | FALSE | 3.375551 | FALSE | Neuron                 |
| CTCCATGC db/m1 | db/m | 1703 | 0.143501 | TRUE  | 14.94499 | TRUE  |                        |
| CTCCATGC db/m1 | db/m | 1330 | 0.011319 | FALSE | 1.56222  | FALSE | Pericyte               |
| CTCCATGT db/m1 | db/m | 333  | 0.052669 | FALSE | 3.362447 | FALSE | Muller cell            |
| CTCCCAAC db/m1 | db/m | 3516 | 0.037564 | FALSE | 1.264317 | FALSE | Photoreceptor          |
| CTCCCAAG db/m1 | db/m | 542  | 0.030859 | FALSE | 3.903059 | FALSE | Neuron                 |

|                |      |      |          |       |          |       |                        |
|----------------|------|------|----------|-------|----------|-------|------------------------|
| CTCCCAAG db/m1 | db/m | 3658 | 0.059406 | FALSE | 1.161082 | FALSE | Photoreceptor          |
| CTCCCAAT db/m1 | db/m | 392  | 0.058205 | FALSE | 34.80589 | TRUE  |                        |
| CTCCCTCC db/m1 | db/m | 4392 | 0.027758 | FALSE | 1.100426 | FALSE | Endothelia Venous EC   |
| CTCCCTCG db/m1 | db/m | 4336 | 0.04192  | FALSE | 0.957705 | FALSE | Endothelia Venous EC   |
| CTCCCTCG db/m1 | db/m | 736  | 0.020536 | FALSE | 2.312351 | FALSE | Endothelia Capillary E |
| CTCCCTCG db/m1 | db/m | 8916 | 0.011081 | FALSE | 0.775376 | FALSE | Photoreceptor          |
| CTCCCTCT db/m1 | db/m | 3137 | 0.076994 | FALSE | 1.220261 | FALSE | Photoreceptor          |
| CTCCCTCT db/m1 | db/m | 1888 | 0.012303 | FALSE | 1.61377  | FALSE | Endothelia Capillary E |
| CTCCGATA db/m1 | db/m | 1503 | 0.040404 | FALSE | 1.912959 | FALSE | Endothelia Venous EC   |
| CTCCGATC db/m1 | db/m | 2149 | 0.073582 | FALSE | 1.25483  | FALSE | Endothelia Capillary E |
| CTCCGATC db/m1 | db/m | 3958 | 0.016488 | FALSE | 0.674272 | FALSE | Endothelia Venous EC   |
| CTCCGATC db/m1 | db/m | 1078 | 0.043505 | FALSE | 0.80972  | FALSE | Photoreceptor          |
| CTCCGATC db/m1 | db/m | 3451 | 0.153234 | TRUE  | 3.310512 | FALSE |                        |
| CTCCGATC db/m1 | db/m | 702  | 0.022455 | FALSE | 2.157793 | FALSE | Muller cell            |
| CTCCGATC db/m1 | db/m | 5088 | 0.075259 | FALSE | 0.838183 | FALSE | Photoreceptor          |
| CTCCGATC db/m1 | db/m | 640  | 0.023266 | FALSE | 1.240123 | FALSE | Photoreceptor          |
| CTCCGATC db/m1 | db/m | 6029 | 0.014151 | FALSE | 0.682083 | FALSE | Photoreceptor          |
| CTCCGATC db/m1 | db/m | 3292 | 0.007833 | FALSE | 1.265967 | FALSE | Neuron                 |
| CTCCGATT db/m1 | db/m | 3708 | 0.030318 | FALSE | 1.229493 | FALSE | Endothelia Capillary E |
| CTCCTCCA db/m1 | db/m | 397  | 0.019106 | FALSE | 2.610096 | FALSE | Photoreceptor          |
| CTCCTCT db/m1  | db/m | 1683 | 0.018761 | FALSE | 0.712271 | FALSE | Photoreceptor          |
| CTCCTTTA db/m1 | db/m | 1779 | 0.005958 | FALSE | 1.066527 | FALSE | Endothelia Capillary E |
| CTCCTTTG db/m1 | db/m | 1008 | 0.027758 | FALSE | 3.710031 | FALSE | Muller cell            |
| CTCCTTTG db/m1 | db/m | 1703 | 0.010384 | FALSE | 1.602138 | FALSE | Endothelia Capillary E |
| CTCCTTTT db/m1 | db/m | 5858 | 0.024105 | FALSE | 0.892561 | FALSE | Photoreceptor          |
| CTCCTTTT db/m1 | db/m | 1240 | 0.018422 | FALSE | 1.562596 | FALSE | Endothelia Capillary E |
| CTCGAGG db/m1  | db/m | 4736 | 0.024105 | FALSE | 0.86675  | FALSE | Photoreceptor          |
| CTCGAGG db/m1  | db/m | 601  | 0.045165 | FALSE | 1.959513 | FALSE | Photoreceptor          |
| CTCGAGG db/m1  | db/m | 3357 | 0.01981  | FALSE | 1.114929 | FALSE | Endothelia Venous EC   |
| CTCGAGG db/m1  | db/m | 676  | 0.054795 | FALSE | 3.836914 | FALSE | Muller cell            |
| CTCGAGG db/m1  | db/m | 4062 | 0.024105 | FALSE | 1.089805 | FALSE | Photoreceptor          |
| CTCGAGG db/m1  | db/m | 1928 | 0.036891 | FALSE | 1.349072 | FALSE | Photoreceptor          |
| CTCGAGG db/m1  | db/m | 389  | 0.024534 | FALSE | 2.751794 | FALSE | Endothelia Capillary E |
| CTCGAGG db/m1  | db/m | 1128 | 0.061912 | FALSE | 2.247724 | FALSE | Photoreceptor          |
| CTCTCAGA db/m1 | db/m | 464  | 0.048732 | FALSE | 19.02718 | TRUE  |                        |
| CTCTCAGC db/m1 | db/m | 514  | 0.019106 | FALSE | 3.188201 | FALSE | Endothelia Capillary E |
| CTCTCAGC db/m1 | db/m | 5645 | 0.017434 | FALSE | 1.189608 | FALSE | Photoreceptor          |
| CTCTCAGC db/m1 | db/m | 629  | 0.070386 | FALSE | 4.056978 | FALSE | Muller cell            |
| CTCTCAGC db/m1 | db/m | 2513 | 0.112477 | TRUE  | 12.13733 | TRUE  |                        |
| CTCTCAGT db/m1 | db/m | 356  | 0.025868 | FALSE | 2.469988 | FALSE | Photoreceptor          |
| CTCTCGAA db/m1 | db/m | 950  | 0.015287 | FALSE | 0.9919   | FALSE | Photoreceptor          |
| CTCTCGAG db/m1 | db/m | 7044 | 0.007441 | FALSE | 1.178295 | FALSE | Photoreceptor          |
| CTCTCGAT db/m1 | db/m | 3393 | 0.048732 | FALSE | 1.199071 | FALSE | Photoreceptor          |
| CTCTCGAT db/m1 | db/m | 1833 | 0.051646 | FALSE | 1.813578 | FALSE | Photoreceptor          |
| CTCTGGTA db/m1 | db/m | 834  | 0.044326 | FALSE | 2.225406 | FALSE | Photoreceptor          |
| CTCTGGTC db/m1 | db/m | 1560 | 0.084562 | FALSE | 1.574319 | FALSE | Photoreceptor          |
| CTCTGGTC db/m1 | db/m | 552  | 0.021286 | FALSE | 65.22651 | TRUE  |                        |

|                |      |      |          |       |          |       |                        |
|----------------|------|------|----------|-------|----------|-------|------------------------|
| CTCTGGTC db/m1 | db/m | 924  | 0.029787 | FALSE | 1.396178 | FALSE | Photoreceptor          |
| CTCTGGTT db/m1 | db/m | 1450 | 0.014429 | FALSE | 2.049268 | FALSE | Neuron                 |
| CTCTGGTT db/m1 | db/m | 1285 | 0.009933 | FALSE | 1.678775 | FALSE | Endothelia Capillary E |
| CTCTGGTT db/m1 | db/m | 2932 | 0.084562 | FALSE | 9.121841 | TRUE  |                        |
| CTGAATG db/m1  | db/m | 679  | 0.067388 | FALSE | 1.744597 | FALSE | Microglia              |
| CTGAATG db/m1  | db/m | 460  | 0.011561 | FALSE | 2.123778 | FALSE | Photoreceptor          |
| CTGAATG db/m1  | db/m | 515  | 0.038251 | FALSE | 1.036329 | FALSE | Photoreceptor          |
| CTGAATG db/m1  | db/m | 2331 | 0.033726 | FALSE | 1.981218 | FALSE | Endothelia Aterial EC  |
| CTGAATG db/m1  | db/m | 1357 | 0.013876 | FALSE | 1.786287 | FALSE | Endothelia Capillary E |
| CTGAATG db/m1  | db/m | 1622 | 0.012814 | FALSE | 1.645293 | FALSE | Endothelia Capillary E |
| CTGAATG db/m1  | db/m | 947  | 0.071958 | FALSE | 3.634952 | FALSE | Muller cell            |
| CTGAATG db/m1  | db/m | 3170 | 0.119568 | TRUE  | 4.975923 | FALSE |                        |
| CTGAGCG db/m1  | db/m | 3542 | 0.03313  | FALSE | 1.070826 | FALSE | Photoreceptor          |
| CTGAGCG db/m1  | db/m | 1407 | 0.023682 | FALSE | 1.740786 | FALSE | Photoreceptor          |
| CTGAGCG db/m1  | db/m | 2029 | 0.01981  | FALSE | 1.264143 | FALSE | Endothelia Venous EC   |
| CTGAGCG db/m1  | db/m | 662  | 0.021669 | FALSE | 2.632916 | FALSE | Endothelia Capillary E |
| CTGAGCG db/m1  | db/m | 785  | 0.014151 | FALSE | 1.367473 | FALSE | Photoreceptor          |
| CTGAGCG db/m1  | db/m | 6946 | 0.016488 | FALSE | 0.848255 | FALSE | Photoreceptor          |
| CTGAGCG db/m1  | db/m | 842  | 0.017758 | FALSE | 0.785577 | FALSE | Photoreceptor          |
| CTGAGCG db/m1  | db/m | 1298 | 0.073582 | FALSE | 1.522862 | FALSE | Photoreceptor          |
| CTGAGCG db/m1  | db/m | 7168 | 0.128582 | TRUE  | 1.341896 | FALSE |                        |
| CTGAGCG db/m1  | db/m | 4499 | 0.065957 | FALSE | 1.180702 | FALSE | Photoreceptor          |
| CTGAGCG db/m1  | db/m | 3281 | 0.017434 | FALSE | 1.04515  | FALSE | Photoreceptor          |
| CTGAGGC db/m1  | db/m | 645  | 0.039671 | FALSE | 15.60575 | TRUE  |                        |
| CTGAGGC db/m1  | db/m | 876  | 0.051646 | FALSE | 1.851123 | FALSE | Photoreceptor          |
| CTGAGGC db/m1  | db/m | 1045 | 0.051646 | FALSE | 1.104483 | FALSE | Photoreceptor          |
| CTGAGGC db/m1  | db/m | 445  | 0.026796 | FALSE | 2.244285 | FALSE | Photoreceptor          |
| CTGAGGC db/m1  | db/m | 1287 | 0.051646 | FALSE | 1.164477 | FALSE | Photoreceptor          |
| CTGAGGC db/m1  | db/m | 612  | 0.037564 | FALSE | 0.715403 | FALSE | Muller cell            |
| CTGAGGC db/m1  | db/m | 4876 | 0.017758 | FALSE | 0.832026 | FALSE | Photoreceptor          |
| CTGAGGC db/m1  | db/m | 1616 | 0.148377 | TRUE  | 6.131579 | TRUE  |                        |
| CTGAGGC db/m1  | db/m | 6609 | 0.027758 | FALSE | 0.885745 | FALSE | Photoreceptor          |
| CTGAGGC db/m1  | db/m | 489  | 0.098234 | FALSE | 17.97753 | TRUE  |                        |
| CTGATCCC db/m1 | db/m | 1486 | 0.01981  | FALSE | 1.657855 | FALSE | Endothelia Capillary E |
| CTGATCCC db/m1 | db/m | 5376 | 0.018761 | FALSE | 1.037247 | FALSE | Photoreceptor          |
| CTGATCCT db/m1 | db/m | 954  | 0.034334 | FALSE | 1.09667  | FALSE | Photoreceptor          |
| CTGCAGG db/m1  | db/m | 1325 | 0.053718 | FALSE | 1.181675 | FALSE | Photoreceptor          |
| CTGCAGG db/m1  | db/m | 1946 | 0.022059 | FALSE | 1.260864 | FALSE | Photoreceptor          |
| CTGCAGG db/m1  | db/m | 1414 | 0.014711 | FALSE | 1.447586 | FALSE | Endothelia Capillary E |
| CTGCAGG db/m1  | db/m | 680  | 0.067388 | FALSE | 46.96239 | TRUE  |                        |
| CTGCAGG db/m1  | db/m | 1461 | 0.04192  | FALSE | 1.488671 | FALSE | Photoreceptor          |
| CTGCAGG db/m1  | db/m | 688  | 0.060641 | FALSE | 4.455983 | FALSE | Muller cell            |
| CTGCAGG db/m1  | db/m | 458  | 0.031973 | FALSE | 13.05556 | TRUE  |                        |
| CTGCATCG db/m1 | db/m | 754  | 0.08663  | FALSE | 45.22716 | TRUE  |                        |
| CTGCCATC db/m1 | db/m | 907  | 0.046025 | FALSE | 1.468569 | FALSE | Photoreceptor          |
| CTGCCATC db/m1 | db/m | 889  | 0.005958 | FALSE | 2.093175 | FALSE | Endothelia Capillary E |
| CTGCCATT db/m1 | db/m | 5862 | 0.023682 | FALSE | 1.158463 | FALSE | Photoreceptor          |

|                |      |      |          |       |          |       |                        |
|----------------|------|------|----------|-------|----------|-------|------------------------|
| CTGCCATT db/m1 | db/m | 2923 | 0.047807 | FALSE | 1.438192 | FALSE | Photoreceptor          |
| CTGCCATT db/m1 | db/m | 978  | 0.037564 | FALSE | 1.397357 | FALSE | Photoreceptor          |
| CTGCCTAC db/m1 | db/m | 2536 | 0.015287 | FALSE | 1.018156 | FALSE | Neuron                 |
| CTGCCTAG db/m1 | db/m | 4324 | 0.098234 | FALSE | 1.431171 | FALSE | Photoreceptor          |
| CTGCCTAG db/m1 | db/m | 514  | 0.014429 | FALSE | 2.135143 | FALSE | Photoreceptor          |
| CTGCCTAT db/m1 | db/m | 2899 | 0.038251 | FALSE | 0.882069 | FALSE | Photoreceptor          |
| CTGCCTAT db/m1 | db/m | 2809 | 0.030318 | FALSE | 1.245136 | FALSE | Photoreceptor          |
| CTGCCTAT db/m1 | db/m | 1031 | 0.026328 | FALSE | 0.248727 | FALSE | Photoreceptor          |
| CTGCGAG/ db/m1 | db/m | 1013 | 0.020536 | FALSE | 1.153911 | FALSE | Photoreceptor          |
| CTGCGAG/ db/m1 | db/m | 4136 | 0.043505 | FALSE | 1.47739  | FALSE | Photoreceptor          |
| CTGCGAG( db/m1 | db/m | 7586 | 0.025868 | FALSE | 0.986417 | FALSE | Photoreceptor          |
| CTGCGAG( db/m1 | db/m | 1323 | 0.022059 | FALSE | 1.211808 | FALSE | Endothelia Capillary E |
| CTGCGAG( db/m1 | db/m | 783  | 0.08663  | FALSE | 14.55224 | TRUE  |                        |
| CTGCGAG  db/m1 | db/m | 750  | 0.037564 | FALSE | 0.84     | FALSE | Photoreceptor          |
| CTGCTCAA db/m1 | db/m | 5039 | 0.078788 | FALSE | 1.572766 | FALSE | Neuron                 |
| CTGCTCAC db/m1 | db/m | 2637 | 0.011319 | FALSE | 1.347232 | FALSE | Endothelia Aterial EC  |
| CTGCTCAG db/m1 | db/m | 588  | 0.031973 | FALSE | 0.85981  | FALSE | Neuron                 |
| CTGCTCAG db/m1 | db/m | 3966 | 0.031973 | FALSE | 0.909614 | FALSE | Photoreceptor          |
| CTGCTCAG db/m1 | db/m | 985  | 0.024105 | FALSE | 2.359596 | FALSE | Pericyte               |
| CTGCTCAT db/m1 | db/m | 5322 | 0.034334 | FALSE | 1.050774 | FALSE | Photoreceptor          |
| CTGCTCAT db/m1 | db/m | 631  | 0.03313  | FALSE | 2.629945 | FALSE | Endothelia Capillary E |
| CTGGACG/ db/m1 | db/m | 6978 | 0.018088 | FALSE | 0.957601 | FALSE | Photoreceptor          |
| CTGGACG/ db/m1 | db/m | 3031 | 0.029266 | FALSE | 1.395633 | FALSE | Pericyte               |
| CTGGACG/ db/m1 | db/m | 737  | 0.064568 | FALSE | 1.573291 | FALSE | Photoreceptor          |
| CTGGACG( db/m1 | db/m | 8550 | 0.025868 | FALSE | 0.930399 | FALSE | Photoreceptor          |
| CTGGCAG/ db/m1 | db/m | 2872 | 0.130374 | TRUE  | 5.479675 | TRUE  |                        |
| CTGGCAG( db/m1 | db/m | 1182 | 0.052669 | FALSE | 1.733051 | FALSE | Photoreceptor          |
| CTGGCAG  db/m1 | db/m | 865  | 0.016799 | FALSE | 4.572548 | FALSE | Muller cell            |
| CTGGCAG  db/m1 | db/m | 3890 | 0.016488 | FALSE | 1.256796 | FALSE | Photoreceptor          |
| CTGGCAG  db/m1 | db/m | 458  | 0.031411 | FALSE | 45.14609 | TRUE  |                        |
| CTGGCAG  db/m1 | db/m | 2813 | 0.078788 | FALSE | 1.30831  | FALSE | Photoreceptor          |
| CTGGCAG  db/m1 | db/m | 343  | 0.046025 | FALSE | 54.77912 | TRUE  |                        |
| CTGGTCTA db/m1 | db/m | 636  | 0.058205 | FALSE | 2.886528 | FALSE | Muller cell            |
| CTGGTCTC db/m1 | db/m | 2715 | 0.065957 | FALSE | 1.504846 | FALSE | Neuron                 |
| CTGGTCTC db/m1 | db/m | 1598 | 0.038251 | FALSE | 1.60502  | FALSE | Photoreceptor          |
| CTGGTCTT db/m1 | db/m | 6212 | 0.017758 | FALSE | 1.012199 | FALSE | Photoreceptor          |
| CTGTACCG db/m1 | db/m | 7480 | 0.064568 | FALSE | 0.920658 | FALSE | Photoreceptor          |
| CTGTACCT db/m1 | db/m | 4785 | 0.082569 | FALSE | 1.189188 | FALSE | Endothelia Venous EC   |
| CTGTACCT db/m1 | db/m | 8202 | 0.017434 | FALSE | 0.68001  | FALSE | Photoreceptor          |
| CTGTACCT db/m1 | db/m | 569  | 0.005958 | FALSE | 3.04879  | FALSE | Pericyte               |
| CTGTACCT db/m1 | db/m | 391  | 0.095727 | FALSE | 2.990275 | FALSE | Endothelia Capillary E |
| CTGTAGA/ db/m1 | db/m | 3638 | 0.021669 | FALSE | 1.19556  | FALSE | Endothelia Venous EC   |
| CTGTAGA/ db/m1 | db/m | 6202 | 0.012814 | FALSE | 1.032549 | FALSE | Photoreceptor          |
| CTGTAGA  db/m1 | db/m | 6916 | 0.011319 | FALSE | 0.885238 | FALSE | Photoreceptor          |
| CTGTAGA  db/m1 | db/m | 480  | 0.037564 | FALSE | 2.502159 | FALSE | Photoreceptor          |
| CTGTAGA  db/m1 | db/m | 912  | 0.08663  | FALSE | 1.901262 | FALSE | Photoreceptor          |
| CTGTAGA  db/m1 | db/m | 380  | 0.041154 | FALSE | 2.806767 | FALSE | Photoreceptor          |

|                 |      |      |          |       |          |       |                        |
|-----------------|------|------|----------|-------|----------|-------|------------------------|
| CTGTATTA db/m1  | db/m | 641  | 0.031411 | FALSE | 0.601788 | FALSE | Photoreceptor          |
| CTGTATTA db/m1  | db/m | 1268 | 0.043505 | FALSE | 1.435113 | FALSE | Photoreceptor          |
| CTGTATTC db/m1  | db/m | 671  | 0.015879 | FALSE | 2.464272 | FALSE | Muller cell            |
| CTGTATTG db/m1  | db/m | 940  | 0.036232 | FALSE | 1.060207 | FALSE | Photoreceptor          |
| CTGTATTG db/m1  | db/m | 4435 | 0.035586 | FALSE | 1.14379  | FALSE | Photoreceptor          |
| CTGTATTT db/m1  | db/m | 1895 | 0.046906 | FALSE | 1.51752  | FALSE | Photoreceptor          |
| CTGTTCGA db/m1  | db/m | 1480 | 0.034334 | FALSE | 0.92043  | FALSE | Photoreceptor          |
| CTGTTCGA db/m1  | db/m | 442  | 0.028754 | FALSE | 3.185642 | FALSE | Endothelia Capillary E |
| CTGTTCGTC db/m1 | db/m | 4612 | 0.033726 | FALSE | 0.971649 | FALSE | Photoreceptor          |
| CTGTTCGTC db/m1 | db/m | 7521 | 0.013074 | FALSE | 0.686386 | FALSE | Photoreceptor          |
| CTGTTCGTC db/m1 | db/m | 4164 | 0.044326 | FALSE | 1.155859 | FALSE | Photoreceptor          |
| CTGTTCGTC db/m1 | db/m | 488  | 0.076994 | FALSE | 3.461074 | FALSE | Pericyte               |
| CTGTTCGTT db/m1 | db/m | 7727 | 0.065957 | FALSE | 0.835609 | FALSE | Photoreceptor          |
| CTGTTCGTT db/m1 | db/m | 8257 | 0.073582 | FALSE | 0.860686 | FALSE | Photoreceptor          |
| CTGTGAA db/m1   | db/m | 3196 | 0.045165 | FALSE | 0.931254 | FALSE | Endothelia Venous EC   |
| CTGTGAA db/m1   | db/m | 1526 | 0.012303 | FALSE | 1.50451  | FALSE | Endothelia Capillary E |
| CTGTGAAC db/m1  | db/m | 5409 | 0.031411 | FALSE | 1.070591 | FALSE | Photoreceptor          |
| CTGTGAAC db/m1  | db/m | 1316 | 0.058205 | FALSE | 0.900306 | FALSE | Photoreceptor          |
| CTGTGAAC db/m1  | db/m | 2313 | 0.004275 | FALSE | 1.339654 | FALSE | Neuron                 |
| CTGTGAAC db/m1  | db/m | 971  | 0.058205 | FALSE | 2.064766 | FALSE | Photoreceptor          |
| CTGTGAA db/m1   | db/m | 6511 | 0.035586 | FALSE | 1.022947 | FALSE | Photoreceptor          |
| CTGTGGG db/m1   | db/m | 386  | 0.023266 | FALSE | 2.278144 | FALSE | Photoreceptor          |
| CTGTGGG db/m1   | db/m | 3425 | 0.034334 | FALSE | 1.124849 | FALSE | Photoreceptor          |
| CTGTGGG db/m1   | db/m | 2954 | 0.061912 | FALSE | 1.523575 | FALSE | Photoreceptor          |
| CTGTGGG db/m1   | db/m | 3435 | 0.060641 | FALSE | 1.464253 | FALSE | Photoreceptor          |
| CTTACCGC db/m1  | db/m | 6945 | 0.023266 | FALSE | 0.769342 | FALSE | Photoreceptor          |
| CTTACCGC db/m1  | db/m | 5415 | 0.041154 | FALSE | 1.088191 | FALSE | Photoreceptor          |
| CTTACCGC db/m1  | db/m | 1941 | 0.024971 | FALSE | 1.217659 | FALSE | Endothelia Capillary E |
| CTTACCGT db/m1  | db/m | 7503 | 0.026796 | FALSE | 0.767357 | FALSE | Photoreceptor          |
| CTTAGGAC db/m1  | db/m | 2897 | 0.060641 | FALSE | 1.072521 | FALSE | Endothelia Venous EC   |
| CTTAGGAC db/m1  | db/m | 1252 | 0.031411 | FALSE | 1.875159 | FALSE | Pericyte               |
| CTTAGGAC db/m1  | db/m | 454  | 0.023682 | FALSE | 55.64626 | TRUE  |                        |
| CTTAGGAC db/m1  | db/m | 750  | 0.037564 | FALSE | 1.316964 | FALSE | Photoreceptor          |
| CTTAGGAC db/m1  | db/m | 2406 | 0.043505 | FALSE | 16.09786 | TRUE  |                        |
| CTTAGGA db/m1   | db/m | 2255 | 0.013338 | FALSE | 0.550606 | FALSE | Photoreceptor          |
| CTTCAATA db/m1  | db/m | 568  | 0.020536 | FALSE | 4.141998 | FALSE | Muller cell            |
| CTTCCGAC db/m1  | db/m | 3850 | 0.177638 | TRUE  | 9.904635 | TRUE  |                        |
| CTTCCGAT db/m1  | db/m | 3143 | 0.042704 | FALSE | 1.314895 | FALSE | Photoreceptor          |
| CTTCCGAT db/m1  | db/m | 1027 | 0.021669 | FALSE | 0.537721 | FALSE | Photoreceptor          |
| CTTCCGAT db/m1  | db/m | 2725 | 0.120957 | TRUE  | 3.200582 | FALSE |                        |
| CTTCCTTA db/m1  | db/m | 517  | 0.031411 | FALSE | 2.368577 | FALSE | Endothelia Capillary E |
| CTTCCTTA db/m1  | db/m | 857  | 0.042704 | FALSE | 1.80953  | FALSE | Photoreceptor          |
| CTTCCTTA db/m1  | db/m | 5677 | 0.042704 | FALSE | 1.188086 | FALSE | Photoreceptor          |
| CTTCCTTA db/m1  | db/m | 7567 | 0.024105 | FALSE | 0.381298 | FALSE | Photoreceptor          |
| CTTCCTTC db/m1  | db/m | 2410 | 0.080645 | FALSE | 1.916744 | FALSE | Endothelia Capillary E |
| CTTCCTTC db/m1  | db/m | 1084 | 0.019455 | FALSE | 1.483638 | FALSE | Photoreceptor          |
| CTTCCTTG db/m1  | db/m | 8634 | 0.036232 | FALSE | 0.742882 | FALSE | Photoreceptor          |



|                |      |      |          |       |          |       |                        |
|----------------|------|------|----------|-------|----------|-------|------------------------|
| CTTCCTTT(db/m1 | db/m | 1151 | 0.015879 | FALSE | 1.135292 | FALSE | Photoreceptor          |
| CTTCGGTA db/m1 | db/m | 1024 | 0.023266 | FALSE | 1.280185 | FALSE | Photoreceptor          |
| CTTCGGTC db/m1 | db/m | 4659 | 0.035586 | FALSE | 1.15804  | FALSE | Endothelia Venous EC   |
| CTTCGGTC db/m1 | db/m | 2104 | 0.012052 | FALSE | 1.137108 | FALSE | Endothelia Aterial EC  |
| CTTCGGTC db/m1 | db/m | 549  | 0.047807 | FALSE | 1.291561 | FALSE | Photoreceptor          |
| CTTCGGTC db/m1 | db/m | 872  | 0.024534 | FALSE | 1.206458 | FALSE | Photoreceptor          |
| CTTCGGTC db/m1 | db/m | 6005 | 0.014429 | FALSE | 1.143026 | FALSE | Photoreceptor          |
| CTTCGGTC db/m1 | db/m | 450  | 0.036891 | FALSE | 3.09018  | FALSE | Neuron                 |
| CTTCGGTT db/m1 | db/m | 314  | 0.024971 | FALSE | 27.43539 | TRUE  |                        |
| CTTCGGTT db/m1 | db/m | 1452 | 0.03313  | FALSE | 0.983754 | FALSE | Photoreceptor          |
| CTTCGGTT db/m1 | db/m | 3666 | 0.022455 | FALSE | 1.014714 | FALSE | Endothelia Venous EC   |
| CTTCGGTT db/m1 | db/m | 1420 | 0.054795 | FALSE | 2.070009 | FALSE | Photoreceptor          |
| CTTCTAAC db/m1 | db/m | 8204 | 0.023682 | FALSE | 0.740415 | FALSE | Photoreceptor          |
| CTTCTAAG db/m1 | db/m | 4066 | 0.382671 | TRUE  | 20.90267 | TRUE  |                        |
| CTTCTAAG db/m1 | db/m | 2316 | 0.063221 | FALSE | 1.607692 | FALSE | Endothelia Capillary E |
| CTTCTAAG db/m1 | db/m | 6533 | 0.143501 | TRUE  | 1.328408 | FALSE |                        |
| CTTCTAAT db/m1 | db/m | 1092 | 0.046025 | FALSE | 2.634803 | FALSE | Endothelia Capillary E |
| CTTCTAAT db/m1 | db/m | 2394 | 0.031973 | FALSE | 1.2546   | FALSE | Endothelia Capillary E |
| CTTCTAAT db/m1 | db/m | 3959 | 0.033726 | FALSE | 0.984674 | FALSE | Photoreceptor          |
| CTTCTCTA db/m1 | db/m | 3245 | 0.053718 | FALSE | 1.240583 | FALSE | Endothelia Venous EC   |
| CTTCTCTC db/m1 | db/m | 381  | 0.017434 | FALSE | 3.280197 | FALSE | Photoreceptor          |
| CTTCTCTC db/m1 | db/m | 2087 | 0.035586 | FALSE | 1.287746 | FALSE | Photoreceptor          |
| CTTCTCTT db/m1 | db/m | 430  | 0.037564 | FALSE | 0.874117 | FALSE | Photoreceptor          |
| CTTCTCTT db/m1 | db/m | 345  | 0.280108 | TRUE  | 10.01821 | TRUE  |                        |
| CTTGAGAT db/m1 | db/m | 1275 | 0.013074 | FALSE | 1.945173 | FALSE | Pericyte               |
| CTTGAGAT db/m1 | db/m | 332  | 0.192271 | TRUE  | 20.34549 | TRUE  |                        |
| CTTGAGAT db/m1 | db/m | 709  | 0.075259 | FALSE | 16.26506 | TRUE  |                        |
| CTTGAGAT db/m1 | db/m | 1873 | 0.016799 | FALSE | 1.152221 | FALSE | Photoreceptor          |
| CTTGAGAT db/m1 | db/m | 1101 | 0.028754 | FALSE | 2.153514 | FALSE | Neuron                 |
| CTTGAGAT db/m1 | db/m | 1055 | 0.045165 | FALSE | 0.913463 | FALSE | Photoreceptor          |
| CTTGAGAT db/m1 | db/m | 4701 | 0.013605 | FALSE | 1.073303 | FALSE | Photoreceptor          |
| CTTGAGAT db/m1 | db/m | 3949 | 0.164835 | TRUE  | 4.167076 | FALSE |                        |
| CTTGAGAT db/m1 | db/m | 3344 | 0.041154 | FALSE | 1.106457 | FALSE | Photoreceptor          |
| CTTGATTG db/m1 | db/m | 845  | 0.070386 | FALSE | 1.99159  | FALSE | Photoreceptor          |
| CTTTCAAC db/m1 | db/m | 513  | 0.013605 | FALSE | 1.239726 | FALSE | Photoreceptor          |
| CTTTCAAC db/m1 | db/m | 659  | 0.030859 | FALSE | 3.236226 | FALSE | Neuron                 |
| CTTTCAAC db/m1 | db/m | 1164 | 0.024534 | FALSE | 0.5601   | FALSE | Photoreceptor          |
| CTTTCAAG db/m1 | db/m | 2836 | 0.034954 | FALSE | 1.046261 | FALSE | Photoreceptor          |
| CTTTCGGA db/m1 | db/m | 2936 | 0.023682 | FALSE | 1.14961  | FALSE | Photoreceptor          |
| CTTTCGGA db/m1 | db/m | 1444 | 0.076994 | FALSE | 1.435115 | FALSE | Photoreceptor          |
| CTTTCGGC db/m1 | db/m | 525  | 0.035586 | FALSE | 3.932135 | FALSE | Muller cell            |
| CTTTCGGT db/m1 | db/m | 783  | 0.036891 | FALSE | 1.910207 | FALSE | Photoreceptor          |
| GAAACCT db/m1  | db/m | 2013 | 0.03313  | FALSE | 1.6196   | FALSE | Pericyte               |
| GAAACCT db/m1  | db/m | 5438 | 0.046906 | FALSE | 1.209437 | FALSE | Photoreceptor          |
| GAAACCT db/m1  | db/m | 445  | 0.031973 | FALSE | 0.485551 | FALSE | Photoreceptor          |
| GAAACCT db/m1  | db/m | 2729 | 0.041154 | FALSE | 1.166526 | FALSE | Photoreceptor          |
| GAAACCT db/m1  | db/m | 1510 | 0.046025 | FALSE | 1.627221 | FALSE | Photoreceptor          |

|                |      |      |          |       |          |       |                        |
|----------------|------|------|----------|-------|----------|-------|------------------------|
| GAAATGA/ db/m1 | db/m | 1214 | 0.039671 | FALSE | 1.158048 | FALSE | Photoreceptor          |
| GAAATGA( db/m1 | db/m | 1213 | 0.022857 | FALSE | 0.766271 | FALSE | Photoreceptor          |
| GAAATGA( db/m1 | db/m | 8953 | 0.013074 | FALSE | 0.811168 | FALSE | Photoreceptor          |
| GAAATGA( db/m1 | db/m | 1620 | 0.058205 | FALSE | 1.577758 | FALSE | Photoreceptor          |
| GAAATGA( db/m1 | db/m | 1892 | 0.023266 | FALSE | 1.276415 | FALSE | Endothelia Capillary E |
| GAAATGA` db/m1 | db/m | 1447 | 0.057037 | FALSE | 2.080698 | FALSE | Photoreceptor          |
| GAAATGA` db/m1 | db/m | 4932 | 0.024534 | FALSE | 0.885833 | FALSE | Photoreceptor          |
| GAAATGA` db/m1 | db/m | 391  | 0.05065  | FALSE | 1.185351 | FALSE | Photoreceptor          |
| GAAATGA` db/m1 | db/m | 836  | 0.040404 | FALSE | 1.184831 | FALSE | Photoreceptor          |
| GAACACT/ db/m1 | db/m | 2041 | 0.046906 | FALSE | 0.915108 | FALSE | Photoreceptor          |
| GAACACT/ db/m1 | db/m | 8985 | 0.011319 | FALSE | 0.776492 | FALSE | Photoreceptor          |
| GAACACT( db/m1 | db/m | 7141 | 0.017758 | FALSE | 0.759515 | FALSE | Photoreceptor          |
| GAACACTI db/m1 | db/m | 4790 | 0.047807 | FALSE | 0.988737 | FALSE | Photoreceptor          |
| GAACACTI db/m1 | db/m | 8103 | 0.021286 | FALSE | 0.696112 | FALSE | Photoreceptor          |
| GAACGTT/ db/m1 | db/m | 495  | 0.015581 | FALSE | 0.56564  | FALSE | Photoreceptor          |
| GAACGTT/ db/m1 | db/m | 2140 | 0.027758 | FALSE | 1.25471  | FALSE | Endothelia Capillary E |
| GAACGTT( db/m1 | db/m | 7864 | 0.009933 | FALSE | 0.838065 | FALSE | Photoreceptor          |
| GAACGTT( db/m1 | db/m | 4275 | 0.030318 | FALSE | 0.770224 | FALSE | Photoreceptor          |
| GAACGTT( db/m1 | db/m | 1273 | 0.088776 | FALSE | 19.88095 | TRUE  |                        |
| GAACGTTI db/m1 | db/m | 1480 | 0.055901 | FALSE | 2.217861 | FALSE | Photoreceptor          |
| GAACGTTI db/m1 | db/m | 7796 | 0.011319 | FALSE | 0.958998 | FALSE | Photoreceptor          |
| GAACGTG/ db/m1 | db/m | 3012 | 0.063221 | FALSE | 1.397382 | FALSE | Photoreceptor          |
| GAACGTG( db/m1 | db/m | 1554 | 0.009493 | FALSE | 1.416404 | FALSE | Pericyte               |
| GAACGTG( db/m1 | db/m | 2690 | 0.046025 | FALSE | 1.452561 | FALSE | Photoreceptor          |
| GAACGTG( db/m1 | db/m | 5627 | 0.15354  | TRUE  | 1.65708  | FALSE |                        |
| GAACGTG( db/m1 | db/m | 925  | 0.076994 | FALSE | 2.990869 | FALSE | Photoreceptor          |
| GAACGTG( db/m1 | db/m | 7025 | 0.028754 | FALSE | 0.817985 | FALSE | Photoreceptor          |
| GAACGTGI db/m1 | db/m | 1805 | 0.013605 | FALSE | 1.776988 | FALSE | Endothelia Capillary E |
| GAACGTGI db/m1 | db/m | 1456 | 0.028251 | FALSE | 1.216661 | FALSE | Photoreceptor          |
| GAACGTGI db/m1 | db/m | 3502 | 0.064568 | FALSE | 1.302159 | FALSE | Photoreceptor          |
| GAAGAAT/ db/m1 | db/m | 2010 | 0.057037 | FALSE | 1.570719 | FALSE | Photoreceptor          |
| GAAGAAT/ db/m1 | db/m | 1041 | 0.015287 | FALSE | 1.244679 | FALSE | Photoreceptor          |
| GAAGAAT( db/m1 | db/m | 1233 | 0.054795 | FALSE | 1.631185 | FALSE | Photoreceptor          |
| GAAGAAT( db/m1 | db/m | 982  | 0.035586 | FALSE | 0.873305 | FALSE | Photoreceptor          |
| GAAGAAT( db/m1 | db/m | 4217 | 0.044326 | FALSE | 1.343353 | FALSE | Photoreceptor          |
| GAAGAAT( db/m1 | db/m | 1148 | 0.024534 | FALSE | 1.044517 | FALSE | Photoreceptor          |
| GAAGAAT` db/m1 | db/m | 7184 | 0.015581 | FALSE | 0.994993 | FALSE | Photoreceptor          |
| GAAGAAT` db/m1 | db/m | 4314 | 0.029266 | FALSE | 0.97461  | FALSE | Photoreceptor          |
| GAAGCCC/ db/m1 | db/m | 2336 | 0.031411 | FALSE | 1.540034 | FALSE | Neuron                 |
| GAAGCCC/ db/m1 | db/m | 1320 | 0.020908 | FALSE | 0.962693 | FALSE | Photoreceptor          |
| GAAGCCC( db/m1 | db/m | 2932 | 0.005264 | FALSE | 1.607807 | FALSE | Neuron                 |
| GAAGCCC( db/m1 | db/m | 6791 | 0.010614 | FALSE | 0.912202 | FALSE | Photoreceptor          |
| GAAGCCC( db/m1 | db/m | 2095 | 0.024105 | FALSE | 1.021041 | FALSE | Photoreceptor          |
| GAAGCCCI db/m1 | db/m | 2269 | 0.143501 | TRUE  | 8.48564  | TRUE  |                        |
| GAAGCGA/ db/m1 | db/m | 6509 | 0.031973 | FALSE | 0.991016 | FALSE | Photoreceptor          |
| GAAGCGA/ db/m1 | db/m | 6668 | 0.014997 | FALSE | 0.905825 | FALSE | Photoreceptor          |
| GAAGGAC, db/m1 | db/m | 782  | 0.016488 | FALSE | 0.542946 | FALSE | Photoreceptor          |

|               |      |      |          |       |          |       |                        |
|---------------|------|------|----------|-------|----------|-------|------------------------|
| GAAGGAC db/m1 | db/m | 4030 | 0.038953 | FALSE | 1.179862 | FALSE | Endothelia Venous EC   |
| GAAGGAC db/m1 | db/m | 2113 | 0.122388 | TRUE  | 3.202995 | FALSE |                        |
| GAAGGAC db/m1 | db/m | 868  | 0.095727 | FALSE | 24.42548 | TRUE  |                        |
| GAAGGAC db/m1 | db/m | 6605 | 0.038251 | FALSE | 1.042744 | FALSE | Photoreceptor          |
| GAAGGAC db/m1 | db/m | 3858 | 0.05065  | FALSE | 1.13363  | FALSE | Photoreceptor          |
| GAAGGAC db/m1 | db/m | 3258 | 0.065957 | FALSE | 1.175269 | FALSE | Photoreceptor          |
| GAAGGGT db/m1 | db/m | 584  | 0.015287 | FALSE | 1.599454 | FALSE | Photoreceptor          |
| GAAGGGT db/m1 | db/m | 1331 | 0.034334 | FALSE | 1.732498 | FALSE | Endothelia Venous EC   |
| GAAGGGT db/m1 | db/m | 3062 | 0.043505 | FALSE | 1.212311 | FALSE | Photoreceptor          |
| GAAGGGT db/m1 | db/m | 4534 | 0.011805 | FALSE | 1.159784 | FALSE | Photoreceptor          |
| GAAGTAA db/m1 | db/m | 6568 | 0.15354  | TRUE  | 2.845563 | FALSE |                        |
| GAAGTAA db/m1 | db/m | 3913 | 0.053718 | FALSE | 1.18275  | FALSE | Photoreceptor          |
| GAAGTAA db/m1 | db/m | 1267 | 0.018761 | FALSE | 1.49187  | FALSE | Endothelia Capillary E |
| GAATAGA db/m1 | db/m | 2086 | 0.041154 | FALSE | 1.006091 | FALSE | Endothelia Capillary E |
| GAATAGA db/m1 | db/m | 2766 | 0.025868 | FALSE | 1.084267 | FALSE | Photoreceptor          |
| GAATAGA db/m1 | db/m | 489  | 0.020908 | FALSE | 3.025914 | FALSE | Endothelia Capillary E |
| GAATAGA db/m1 | db/m | 2356 | 0.034954 | FALSE | 1.487235 | FALSE | Photoreceptor          |
| GAATAGA db/m1 | db/m | 3434 | 0.150727 | TRUE  | 3.683095 | FALSE |                        |
| GAATAGA db/m1 | db/m | 5446 | 0.010846 | FALSE | 1.087664 | FALSE | Photoreceptor          |
| GAATAGA db/m1 | db/m | 5219 | 0.049679 | FALSE | 1.049729 | FALSE | Endothelia Venous EC   |
| GAATCAC db/m1 | db/m | 3517 | 0.011561 | FALSE | 1.196578 | FALSE | Endothelia Venous EC   |
| GAATCAC db/m1 | db/m | 462  | 0.026796 | FALSE | 1.074918 | FALSE | Photoreceptor          |
| GAATCAC db/m1 | db/m | 3626 | 0.022455 | FALSE | 1.301586 | FALSE | Endothelia Venous EC   |
| GAATCAC db/m1 | db/m | 3978 | 0.045165 | FALSE | 1.3845   | FALSE | Endothelia Venous EC   |
| GAATCAC db/m1 | db/m | 580  | 0.046025 | FALSE | 1.381473 | FALSE | Photoreceptor          |
| GAATCGT db/m1 | db/m | 6226 | 0.030318 | FALSE | 0.636473 | FALSE | Photoreceptor          |
| GAATCGT db/m1 | db/m | 645  | 0.054795 | FALSE | 47.39365 | TRUE  |                        |
| GAATCGT db/m1 | db/m | 1707 | 0.109375 | TRUE  | 2.58133  | FALSE |                        |
| GAATCGT db/m1 | db/m | 1024 | 0.037564 | FALSE | 1.481592 | FALSE | Photoreceptor          |
| GAATCGT db/m1 | db/m | 3090 | 0.008234 | FALSE | 1.402117 | FALSE | Photoreceptor          |
| GACACGC db/m1 | db/m | 4348 | 0.485327 | TRUE  | 4.689151 | FALSE |                        |
| GACACGC db/m1 | db/m | 2794 | 0.037564 | FALSE | 1.457404 | FALSE | Endothelia Venous EC   |
| GACACGC db/m1 | db/m | 6210 | 0.011561 | FALSE | 0.994832 | FALSE | Photoreceptor          |
| GACACGC db/m1 | db/m | 1927 | 0.021669 | FALSE | 1.802847 | FALSE | Endothelia Capillary E |
| GACACGC db/m1 | db/m | 1165 | 0.044326 | FALSE | 1.451683 | FALSE | Photoreceptor          |
| GACACGC db/m1 | db/m | 3632 | 0.026328 | FALSE | 1.41547  | FALSE | Endothelia Capillary E |
| GACAGCC db/m1 | db/m | 793  | 0.071958 | FALSE | 3.449225 | FALSE | Muller cell            |
| GACAGCC db/m1 | db/m | 2334 | 0.053718 | FALSE | 0.997634 | FALSE | Photoreceptor          |
| GACAGCC db/m1 | db/m | 7322 | 0.026328 | FALSE | 1.050174 | FALSE | Photoreceptor          |
| GACAGCC db/m1 | db/m | 2411 | 0.023682 | FALSE | 0.952176 | FALSE | Photoreceptor          |
| GACAGCC db/m1 | db/m | 1030 | 0.063221 | FALSE | 0.497449 | FALSE | Photoreceptor          |
| GACAGCC db/m1 | db/m | 771  | 0.04192  | FALSE | 1.78459  | FALSE | Photoreceptor          |
| GACAGCC db/m1 | db/m | 3058 | 0.047807 | FALSE | 1.1398   | FALSE | Endothelia Venous EC   |
| GACAGCC db/m1 | db/m | 3850 | 0.054795 | FALSE | 1.113143 | FALSE | Endothelia Venous EC   |
| GACAGCC db/m1 | db/m | 362  | 0.012052 | FALSE | 4.766187 | FALSE | Muller cell            |
| GACAGCC db/m1 | db/m | 439  | 0.024534 | FALSE | 3.585722 | FALSE | Muller cell            |
| GACAGCC db/m1 | db/m | 2141 | 0.028251 | FALSE | 1.049037 | FALSE | Neuron                 |

|                |      |      |          |       |          |       |                        |
|----------------|------|------|----------|-------|----------|-------|------------------------|
| GACATCA# db/m1 | db/m | 379  | 0.08663  | FALSE | 2.903734 | FALSE | Microglia              |
| GACATCA# db/m1 | db/m | 690  | 0.051646 | FALSE | 1.02212  | FALSE | Photoreceptor          |
| GACATCA# db/m1 | db/m | 487  | 0.057037 | FALSE | 1.442482 | FALSE | Photoreceptor          |
| GACATCA# db/m1 | db/m | 1772 | 0.073582 | FALSE | 7.589193 | TRUE  |                        |
| GACATCA# db/m1 | db/m | 503  | 0.075259 | FALSE | 0.981548 | FALSE | Photoreceptor          |
| GACATCA# db/m1 | db/m | 657  | 0.13452  | TRUE  | 7.854985 | TRUE  |                        |
| GACATCA# db/m1 | db/m | 2088 | 0.029787 | FALSE | 0.984237 | FALSE | Photoreceptor          |
| GACATCA# db/m1 | db/m | 865  | 0.027758 | FALSE | 1.796201 | FALSE | Endothelia Capillary E |
| GACATCA# db/m1 | db/m | 3798 | 0.036232 | FALSE | 1.429721 | FALSE | Photoreceptor          |
| GACATCA# db/m1 | db/m | 1313 | 0.098234 | FALSE | 1.209037 | FALSE | Photoreceptor          |
| GACATCA# db/m1 | db/m | 7345 | 0.014997 | FALSE | 1.085899 | FALSE | Photoreceptor          |
| GACATCA# db/m1 | db/m | 2069 | 0.011805 | FALSE | 1.054447 | FALSE | Endothelia Capillary E |
| GACCAAT# db/m1 | db/m | 1523 | 0.059406 | FALSE | 1.204199 | FALSE | Endothelia Capillary E |
| GACCAAT# db/m1 | db/m | 1146 | 0.024105 | FALSE | 1.023781 | FALSE | Photoreceptor          |
| GACCAAT# db/m1 | db/m | 4074 | 0.024534 | FALSE | 0.961045 | FALSE | Photoreceptor          |
| GACCAAT# db/m1 | db/m | 680  | 0.04192  | FALSE | 1.93382  | FALSE | Endothelia Capillary E |
| GACCAAT# db/m1 | db/m | 1022 | 0.075259 | FALSE | 1.850252 | FALSE | Photoreceptor          |
| GACCAAT# db/m1 | db/m | 1165 | 0.026328 | FALSE | 2.97601  | FALSE | Pericyte               |
| GACCCAG# db/m1 | db/m | 1285 | 0.018422 | FALSE | 1.270818 | FALSE | Endothelia Capillary E |
| GACCCAG# db/m1 | db/m | 5977 | 0.008644 | FALSE | 0.991071 | FALSE | Photoreceptor          |
| GACCCAG# db/m1 | db/m | 946  | 0.014997 | FALSE | 2.691244 | FALSE | Endothelia Capillary E |
| GACCCAG# db/m1 | db/m | 6098 | 0.034954 | FALSE | 1.039534 | FALSE | Photoreceptor          |
| GACCCTTA db/m1 | db/m | 587  | 0.027758 | FALSE | 2.908701 | FALSE | Neuron                 |
| GACCCTTA db/m1 | db/m | 2390 | 0.053718 | FALSE | 1.346705 | FALSE | Endothelia Capillary E |
| GACCCTTC db/m1 | db/m | 2931 | 0.011561 | FALSE | 1.493182 | FALSE | Photoreceptor          |
| GACCCTTT db/m1 | db/m | 1517 | 0.049679 | FALSE | 1.996213 | FALSE | Photoreceptor          |
| GACCCTTT db/m1 | db/m | 1371 | 0.026328 | FALSE | 2.0993   | FALSE | Endothelia Capillary E |
| GACCCTTT db/m1 | db/m | 5420 | 0.031973 | FALSE | 0.942427 | FALSE | Photoreceptor          |
| GACCCTTT db/m1 | db/m | 620  | 0.020171 | FALSE | 0.976344 | FALSE | Photoreceptor          |
| GACCGTG# db/m1 | db/m | 7745 | 0.026796 | FALSE | 0.922572 | FALSE | Photoreceptor          |
| GACCGTG# db/m1 | db/m | 4086 | 0.01981  | FALSE | 0.429727 | FALSE | Photoreceptor          |
| GACCGTG# db/m1 | db/m | 573  | 0.026796 | FALSE | 3.471735 | FALSE | Endothelia Capillary E |
| GACCGTG# db/m1 | db/m | 1624 | 0.016488 | FALSE | 1.350011 | FALSE | Endothelia Capillary E |
| GACCGTG# db/m1 | db/m | 1711 | 0.051646 | FALSE | 1.250163 | FALSE | Photoreceptor          |
| GACCGTG# db/m1 | db/m | 1464 | 0.013876 | FALSE | 1.462746 | FALSE | Endothelia Aterial EC  |
| GACCTTCA db/m1 | db/m | 609  | 0.033726 | FALSE | 4.324813 | FALSE | Neuron                 |
| GACCTTCA db/m1 | db/m | 1350 | 0.028754 | FALSE | 1.908873 | FALSE | Photoreceptor          |
| GACCTTCA db/m1 | db/m | 3727 | 0.012814 | FALSE | 1.207807 | FALSE | Endothelia Capillary E |
| GACCTTCC db/m1 | db/m | 4111 | 0.046906 | FALSE | 1.005739 | FALSE | Photoreceptor          |
| GACCTTCC db/m1 | db/m | 1696 | 0.038251 | FALSE | 1.140472 | FALSE | Photoreceptor          |
| GACCTTCC db/m1 | db/m | 749  | 0.015581 | FALSE | 1.773494 | FALSE | Photoreceptor          |
| GACCTTCC db/m1 | db/m | 399  | 0.025868 | FALSE | 2.923483 | FALSE | Muller cell            |
| GACCTTCC db/m1 | db/m | 2157 | 0.022455 | FALSE | 1.443259 | FALSE | Endothelia Capillary E |
| GACCTTCC db/m1 | db/m | 3547 | 0.063221 | FALSE | 1.819133 | FALSE | Photoreceptor          |
| GACGCTG# db/m1 | db/m | 5768 | 0.006499 | FALSE | 1.082942 | FALSE | Photoreceptor          |
| GACGCTG# db/m1 | db/m | 4049 | 0.034334 | FALSE | 1.021943 | FALSE | Photoreceptor          |
| GACGCTG# db/m1 | db/m | 1219 | 0.075259 | FALSE | 0.664183 | FALSE | Photoreceptor          |

|                |      |      |          |       |          |       |                        |
|----------------|------|------|----------|-------|----------|-------|------------------------|
| GACGCTG(db/m1  | db/m | 3584 | 0.031973 | FALSE | 1.004812 | FALSE | Photoreceptor          |
| GACGCTG(db/m1  | db/m | 1941 | 0.060641 | FALSE | 1.182158 | FALSE | Photoreceptor          |
| GACGCTG(db/m1  | db/m | 687  | 0.093319 | FALSE | 0.351189 | FALSE | Photoreceptor          |
| GACGCTG db/m1  | db/m | 2456 | 0.029787 | FALSE | 1.032523 | FALSE | Photoreceptor          |
| GACGTTA db/m1  | db/m | 8432 | 0.411992 | TRUE  | 1.396958 | FALSE |                        |
| GACGTTA db/m1  | db/m | 1858 | 0.038953 | FALSE | 1.599108 | FALSE | Photoreceptor          |
| GACGTTA db/m1  | db/m | 1176 | 0.039671 | FALSE | 2.257202 | FALSE | Photoreceptor          |
| GACGTTA db/m1  | db/m | 962  | 0.051646 | FALSE | 1.060966 | FALSE | Photoreceptor          |
| GACGTTA db/m1  | db/m | 6568 | 0.016799 | FALSE | 0.922278 | FALSE | Photoreceptor          |
| GACGTTA db/m1  | db/m | 3138 | 0.045165 | FALSE | 0.952919 | FALSE | Photoreceptor          |
| GACGTTA db/m1  | db/m | 1298 | 0.058205 | FALSE | 1.127759 | FALSE | Photoreceptor          |
| GACGTTA db/m1  | db/m | 1853 | 0.026796 | FALSE | 1.34206  | FALSE | Photoreceptor          |
| GACTATG db/m1  | db/m | 570  | 0.048732 | FALSE | 3.367163 | FALSE | Muller cell            |
| GACTATG db/m1  | db/m | 498  | 0.15354  | TRUE  | 25.82938 | TRUE  |                        |
| GACTATG db/m1  | db/m | 5618 | 0.038251 | FALSE | 1.029787 | FALSE | Photoreceptor          |
| GACTATG db/m1  | db/m | 1343 | 0.022455 | FALSE | 1.046983 | FALSE | Photoreceptor          |
| GACTATG db/m1  | db/m | 393  | 0.010846 | FALSE | 2.843014 | FALSE | Photoreceptor          |
| GACTATG db/m1  | db/m | 2602 | 0.044326 | FALSE | 1.584273 | FALSE | Endothelia Capillary E |
| GACTATG db/m1  | db/m | 2346 | 0.041154 | FALSE | 1.239476 | FALSE | Photoreceptor          |
| GACTATG db/m1  | db/m | 6624 | 0.029266 | FALSE | 0.456154 | FALSE | Photoreceptor          |
| GACTATG db/m1  | db/m | 2994 | 0.018422 | FALSE | 1.12831  | FALSE | Photoreceptor          |
| GACTATG db/m1  | db/m | 2084 | 0.003196 | FALSE | 1.207372 | FALSE | Neuron                 |
| GACTCAA db/m1  | db/m | 2983 | 0.020908 | FALSE | 1.09983  | FALSE | Endothelia Venous EC   |
| GACTCAA db/m1  | db/m | 8098 | 0.020171 | FALSE | 0.91945  | FALSE | Photoreceptor          |
| GACTCAA db/m1  | db/m | 4403 | 0.057037 | FALSE | 1.295547 | FALSE | Photoreceptor          |
| GACTCAA db/m1  | db/m | 4993 | 0.037564 | FALSE | 1.040975 | FALSE | Photoreceptor          |
| GACTCAA db/m1  | db/m | 913  | 0.046906 | FALSE | 0.906147 | FALSE | Photoreceptor          |
| GACTCAAT db/m1 | db/m | 856  | 0.034334 | FALSE | 61.42241 | TRUE  |                        |
| GACTCTCA db/m1 | db/m | 1605 | 0.027273 | FALSE | 1.965586 | FALSE | Endothelia Venous EC   |
| GACTCTCA db/m1 | db/m | 3630 | 0.017758 | FALSE | 1.253628 | FALSE | Endothelia Venous EC   |
| GACTCTCA db/m1 | db/m | 4188 | 0.013338 | FALSE | 0.88732  | FALSE | Neuron                 |
| GACTCTCC db/m1 | db/m | 481  | 0.037564 | FALSE | 2.723244 | FALSE | Photoreceptor          |
| GACTCTCC db/m1 | db/m | 1205 | 0.084562 | FALSE | 1.879425 | FALSE | Photoreceptor          |
| GACTCTCT db/m1 | db/m | 1176 | 0.067388 | FALSE | 0.60382  | FALSE | Photoreceptor          |
| GACTCTCT db/m1 | db/m | 467  | 0.028754 | FALSE | 66.23932 | TRUE  |                        |
| GACTCTCT db/m1 | db/m | 2569 | 0.010384 | FALSE | 1.068589 | FALSE | Endothelia Venous EC   |
| GACTGAT db/m1  | db/m | 4105 | 0.022455 | FALSE | 0.884775 | FALSE | Photoreceptor          |
| GACTGAT db/m1  | db/m | 1460 | 0.057037 | FALSE | 2.398727 | FALSE | Photoreceptor          |
| GACTGAT db/m1  | db/m | 516  | 0.034954 | FALSE | 38.15612 | TRUE  |                        |
| GACTGAT db/m1  | db/m | 1805 | 0.020171 | FALSE | 1.415364 | FALSE | Endothelia Capillary E |
| GACTTCCA db/m1 | db/m | 356  | 0.035586 | FALSE | 3.038257 | FALSE | Photoreceptor          |
| GACTTCCA db/m1 | db/m | 1451 | 0.064568 | FALSE | 1.173999 | FALSE | Photoreceptor          |
| GACTTCCA db/m1 | db/m | 935  | 0.010614 | FALSE | 1.912962 | FALSE | Endothelia Capillary E |
| GACTTCCC db/m1 | db/m | 5490 | 0.04192  | FALSE | 0.999991 | FALSE | Endothelia Venous EC   |
| GACTTCCC db/m1 | db/m | 5171 | 0.027758 | FALSE | 1.107972 | FALSE | Photoreceptor          |
| GACTTCCC db/m1 | db/m | 638  | 0.068864 | FALSE | 2.762556 | FALSE | Endothelia Capillary E |
| GACTTCCC db/m1 | db/m | 1042 | 0.022455 | FALSE | 1.25912  | FALSE | Photoreceptor          |

|                |      |      |          |       |          |       |                        |
|----------------|------|------|----------|-------|----------|-------|------------------------|
| GACTTCCC db/m1 | db/m | 3155 | 0.014151 | FALSE | 1.267372 | FALSE | Endothelia Capillary E |
| GACTTCCC db/m1 | db/m | 624  | 0.017114 | FALSE | 2.574502 | FALSE | Muller cell            |
| GACTTCCT db/m1 | db/m | 407  | 0.091004 | FALSE | 8.19398  | TRUE  |                        |
| GACTTCCT db/m1 | db/m | 888  | 0.048732 | FALSE | 1.810071 | FALSE | Photoreceptor          |
| GACTTCCT db/m1 | db/m | 563  | 0.009493 | FALSE | 3.332249 | FALSE | Endothelia Capillary E |
| GACTTCCT db/m1 | db/m | 4184 | 0.024971 | FALSE | 1.025446 | FALSE | Endothelia Venous EC   |
| GAGAAAT db/m1  | db/m | 6892 | 0.088776 | FALSE | 0.860569 | FALSE | Photoreceptor          |
| GAGAAAT db/m1  | db/m | 4761 | 0.023682 | FALSE | 0.994893 | FALSE | Photoreceptor          |
| GAGAAAT db/m1  | db/m | 690  | 0.084562 | FALSE | 13.61905 | TRUE  |                        |
| GAGAAAT db/m1  | db/m | 398  | 0.057037 | FALSE | 4.189211 | FALSE | Muller cell            |
| GAGAAAT db/m1  | db/m | 2395 | 0.055901 | FALSE | 1.674119 | FALSE | Endothelia Aterial EC  |
| GAGAAAT db/m1  | db/m | 927  | 0.030859 | FALSE | 1.718029 | FALSE | Photoreceptor          |
| GAGACCC db/m1  | db/m | 6769 | 0.027758 | FALSE | 0.769949 | FALSE | Photoreceptor          |
| GAGACCC db/m1  | db/m | 4680 | 0.014429 | FALSE | 1.209367 | FALSE | Photoreceptor          |
| GAGACCC db/m1  | db/m | 661  | 0.008852 | FALSE | 1.93951  | FALSE | Endothelia Capillary E |
| GAGACCC db/m1  | db/m | 2166 | 0.115723 | TRUE  | 3.408795 | FALSE |                        |
| GAGACCC db/m1  | db/m | 9415 | 0.012303 | FALSE | 0.696256 | FALSE | Photoreceptor          |
| GAGACCC db/m1  | db/m | 524  | 0.022857 | FALSE | 2.855669 | FALSE | Muller cell            |
| GAGACCC db/m1  | db/m | 486  | 0.088776 | FALSE | 1.237474 | FALSE | Photoreceptor          |
| GAGACCC db/m1  | db/m | 578  | 0.073582 | FALSE | 2.632071 | FALSE | Pericyte               |
| GAGACCC db/m1  | db/m | 983  | 0.071958 | FALSE | 1.272711 | FALSE | Photoreceptor          |
| GAGACCC db/m1  | db/m | 8306 | 0.009712 | FALSE | 0.885853 | FALSE | Photoreceptor          |
| GAGACCC db/m1  | db/m | 1465 | 0.03313  | FALSE | 0.686838 | FALSE | Photoreceptor          |
| GAGACCC db/m1  | db/m | 574  | 0.209157 | TRUE  | 39.73703 | TRUE  |                        |
| GAGACTT db/m1  | db/m | 909  | 0.076994 | FALSE | 5.894737 | TRUE  |                        |
| GAGACTT db/m1  | db/m | 1686 | 0.042704 | FALSE | 1.40609  | FALSE | Endothelia Venous EC   |
| GAGACTT db/m1  | db/m | 963  | 0.05065  | FALSE | 2.093303 | FALSE | Photoreceptor          |
| GAGACTT db/m1  | db/m | 4924 | 0.065957 | FALSE | 1.126112 | FALSE | Endothelia Venous EC   |
| GAGACTT db/m1  | db/m | 3368 | 0.017434 | FALSE | 1.188371 | FALSE | Endothelia Capillary E |
| GAGAGGT db/m1  | db/m | 2481 | 0.05065  | FALSE | 1.742088 | FALSE | Neuron                 |
| GAGAGGT db/m1  | db/m | 2446 | 0.022857 | FALSE | 1.218091 | FALSE | Endothelia Venous EC   |
| GAGAGGT db/m1  | db/m | 7812 | 0.061912 | FALSE | 0.767785 | FALSE | Photoreceptor          |
| GAGAGGT db/m1  | db/m | 558  | 0.035586 | FALSE | 0.869755 | FALSE | Photoreceptor          |
| GAGAGGT db/m1  | db/m | 2637 | 0.045165 | FALSE | 1.335484 | FALSE | Photoreceptor          |
| GAGAGGT db/m1  | db/m | 3003 | 0.038251 | FALSE | 1.296185 | FALSE | Photoreceptor          |
| GAGAGGT db/m1  | db/m | 1331 | 0.445833 | TRUE  | 5.391074 | TRUE  |                        |
| GAGAGGT db/m1  | db/m | 364  | 0.014997 | FALSE | 4.12781  | FALSE | Photoreceptor          |
| GAGAGGT db/m1  | db/m | 479  | 0.023266 | FALSE | 0.395641 | FALSE | Photoreceptor          |
| GAGAGGT db/m1  | db/m | 3977 | 0.006317 | FALSE | 1.159847 | FALSE | Neuron                 |
| GAGAGGT db/m1  | db/m | 800  | 0.030859 | FALSE | 2.294663 | FALSE | Photoreceptor          |
| GAGATGG db/m1  | db/m | 6821 | 0.064568 | FALSE | 1.309121 | FALSE | Photoreceptor          |
| GAGATGG db/m1  | db/m | 1233 | 0.038251 | FALSE | 2.06134  | FALSE | Photoreceptor          |
| GAGATGG db/m1  | db/m | 403  | 0.020908 | FALSE | 4.887744 | FALSE | Photoreceptor          |
| GAGATGG db/m1  | db/m | 621  | 0.022059 | FALSE | 0.605534 | FALSE | Photoreceptor          |
| GAGATGG db/m1  | db/m | 2801 | 0.006317 | FALSE | 1.134307 | FALSE | Endothelia Capillary E |
| GAGATGG db/m1  | db/m | 1572 | 0.037564 | FALSE | 1.774055 | FALSE | Endothelia Venous EC   |
| GAGATGG db/m1  | db/m | 635  | 0.060641 | FALSE | 7.667032 | TRUE  |                        |

|               |      |      |          |       |          |       |                         |
|---------------|------|------|----------|-------|----------|-------|-------------------------|
| GAGATGG db/m1 | db/m | 904  | 0.020536 | FALSE | 2.341125 | FALSE | Photoreceptor           |
| GAGATGG db/m1 | db/m | 1578 | 0.030859 | FALSE | 1.250387 | FALSE | Photoreceptor           |
| GAGCCTG db/m1 | db/m | 470  | 0.17103  | TRUE  | 20.05175 | TRUE  |                         |
| GAGCCTG db/m1 | db/m | 6177 | 0.027758 | FALSE | 0.867363 | FALSE | Endothelia Venous EC    |
| GAGCCTG db/m1 | db/m | 1746 | 0.057037 | FALSE | 6.885661 | TRUE  |                         |
| GAGCCTG db/m1 | db/m | 609  | 0.016799 | FALSE | 3.399223 | FALSE | Muller cell             |
| GAGCTGC db/m1 | db/m | 5038 | 0.112477 | TRUE  | 3.94902  | FALSE |                         |
| GAGCTGC db/m1 | db/m | 360  | 0.084562 | FALSE | 3.166682 | FALSE | Muller cell             |
| GAGCTGC db/m1 | db/m | 406  | 0.075259 | FALSE | 2.399795 | FALSE | Endothelia Capillary EC |
| GAGCTGC db/m1 | db/m | 6899 | 0.023266 | FALSE | 0.783588 | FALSE | Photoreceptor           |
| GAGCTGC db/m1 | db/m | 6386 | 0.010846 | FALSE | 0.960194 | FALSE | Photoreceptor           |
| GAGCTGC db/m1 | db/m | 5064 | 0.01981  | FALSE | 1.171587 | FALSE | Photoreceptor           |
| GAGCTGC db/m1 | db/m | 1853 | 0.044326 | FALSE | 1.653923 | FALSE | Photoreceptor           |
| GAGCTGC db/m1 | db/m | 928  | 0.023266 | FALSE | 1.583709 | FALSE | Photoreceptor           |
| GAGGCAA db/m1 | db/m | 619  | 0.020536 | FALSE | 0.528446 | FALSE | Photoreceptor           |
| GAGGCAA db/m1 | db/m | 3998 | 0.082569 | FALSE | 1.118329 | FALSE | Photoreceptor           |
| GAGGCCT db/m1 | db/m | 5984 | 0.005958 | FALSE | 1.035753 | FALSE | Photoreceptor           |
| GAGGCCT db/m1 | db/m | 347  | 0.01981  | FALSE | 4.353271 | FALSE | Muller cell             |
| GAGGCCT db/m1 | db/m | 1017 | 0.075259 | FALSE | 1.893829 | FALSE | Photoreceptor           |
| GAGGCCT db/m1 | db/m | 357  | 0.039671 | FALSE | 3.393016 | FALSE | Muller cell             |
| GAGGCCT db/m1 | db/m | 4136 | 0.15354  | TRUE  | 7.465312 | TRUE  |                         |
| GAGGCCT db/m1 | db/m | 6043 | 0.044326 | FALSE | 1.02068  | FALSE | Photoreceptor           |
| GAGGCCT db/m1 | db/m | 3189 | 0.032546 | FALSE | 1.530997 | FALSE | Photoreceptor           |
| GAGGCCT db/m1 | db/m | 490  | 0.071958 | FALSE | 4.373994 | FALSE | Pericyte                |
| GAGGGAT db/m1 | db/m | 1609 | 0.045165 | FALSE | 0.956056 | FALSE | Photoreceptor           |
| GAGGGAT db/m1 | db/m | 630  | 0.023682 | FALSE | 0.974333 | FALSE | Photoreceptor           |
| GAGGGAT db/m1 | db/m | 2317 | 0.053718 | FALSE | 22.82138 | TRUE  |                         |
| GAGGGAT db/m1 | db/m | 1313 | 0.024105 | FALSE | 0.496787 | FALSE | Photoreceptor           |
| GAGGGAT db/m1 | db/m | 2438 | 0.004116 | FALSE | 1.377632 | FALSE | Neuron                  |
| GAGGGAT db/m1 | db/m | 1467 | 0.016488 | FALSE | 1.234451 | FALSE | Photoreceptor           |
| GAGGGAT db/m1 | db/m | 8786 | 0.037564 | FALSE | 0.596493 | FALSE | Photoreceptor           |
| GAGGGAT db/m1 | db/m | 438  | 0.045165 | FALSE | 57.86436 | TRUE  |                         |
| GAGGGAT db/m1 | db/m | 809  | 0.046025 | FALSE | 1.321856 | FALSE | Photoreceptor           |
| GAGGGTA db/m1 | db/m | 3367 | 0.044326 | FALSE | 0.705378 | FALSE | Photoreceptor           |
| GAGGGTA db/m1 | db/m | 1292 | 0.055901 | FALSE | 2.235955 | FALSE | Photoreceptor           |
| GAGGGTA db/m1 | db/m | 4617 | 0.060641 | FALSE | 1.140183 | FALSE | Photoreceptor           |
| GAGGGTA db/m1 | db/m | 612  | 0.033726 | FALSE | 0.717444 | FALSE | Photoreceptor           |
| GAGGGTA db/m1 | db/m | 2398 | 0.080645 | FALSE | 1.820054 | FALSE | Photoreceptor           |
| GAGGGTA db/m1 | db/m | 881  | 0.022059 | FALSE | 1.706301 | FALSE | Photoreceptor           |
| GAGGGTA db/m1 | db/m | 1620 | 0.064568 | FALSE | 1.447364 | FALSE | Photoreceptor           |
| GAGGGTA db/m1 | db/m | 1345 | 0.011805 | FALSE | 1.222249 | FALSE | Endothelia Capillary EC |
| GAGGGTA db/m1 | db/m | 438  | 0.112477 | TRUE  | 5.415163 | TRUE  |                         |
| GAGTCAT db/m1 | db/m | 3139 | 0.280108 | TRUE  | 5.363498 | TRUE  |                         |
| GAGTCAT db/m1 | db/m | 2829 | 0.016181 | FALSE | 0.668541 | FALSE | Photoreceptor           |
| GAGTCAT db/m1 | db/m | 272  | 0.106646 | TRUE  | 2.614379 | FALSE |                         |
| GAGTCAT db/m1 | db/m | 5934 | 0.030859 | FALSE | 1.048533 | FALSE | Photoreceptor           |
| GAGTCAT db/m1 | db/m | 1201 | 0.093319 | FALSE | 2.694515 | FALSE | Muller cell             |

|                |      |      |          |       |          |       |                        |
|----------------|------|------|----------|-------|----------|-------|------------------------|
| GAGTCATT db/m1 | db/m | 443  | 0.036891 | FALSE | 2.987955 | FALSE | Endothelia Capillary E |
| GAGTCATT db/m1 | db/m | 718  | 0.025868 | FALSE | 1.182993 | FALSE | Photoreceptor          |
| GAGTCATT db/m1 | db/m | 723  | 0.017434 | FALSE | 0.383172 | FALSE | Photoreceptor          |
| GAGTCTA/ db/m1 | db/m | 2044 | 0.019106 | FALSE | 1.506338 | FALSE | Photoreceptor          |
| GAGTGAG db/m1  | db/m | 521  | 0.055901 | FALSE | 3.187183 | FALSE | Muller cell            |
| GAGTGAG db/m1  | db/m | 3682 | 0.029266 | FALSE | 1.386904 | FALSE | Endothelia Venous EC   |
| GAGTGAG db/m1  | db/m | 2617 | 0.014711 | FALSE | 0.550114 | FALSE | Photoreceptor          |
| GAGTGTT db/m1  | db/m | 7702 | 0.017758 | FALSE | 0.816631 | FALSE | Photoreceptor          |
| GAGTGTT db/m1  | db/m | 4566 | 0.098234 | FALSE | 8.188357 | TRUE  |                        |
| GAGTGTT db/m1  | db/m | 2264 | 0.021669 | FALSE | 1.394108 | FALSE | Endothelia Venous EC   |
| GAGTGTT db/m1  | db/m | 6861 | 0.024105 | FALSE | 0.827721 | FALSE | Photoreceptor          |
| GAGTGTT db/m1  | db/m | 3911 | 0.022857 | FALSE | 0.807262 | FALSE | Photoreceptor          |
| GAGTGTT db/m1  | db/m | 2020 | 0.091004 | FALSE | 2.009247 | FALSE | Endothelia Capillary E |
| GAGTGTT db/m1  | db/m | 4717 | 0.017434 | FALSE | 1.074931 | FALSE | Photoreceptor          |
| GAGTGTT db/m1  | db/m | 2349 | 0.070386 | FALSE | 1.198315 | FALSE | Photoreceptor          |
| GAGTTAC db/m1  | db/m | 922  | 0.03313  | FALSE | 1.443749 | FALSE | Photoreceptor          |
| GAGTTAC db/m1  | db/m | 6282 | 0.005782 | FALSE | 1.063283 | FALSE | Photoreceptor          |
| GAGTTAC db/m1  | db/m | 451  | 0.280108 | TRUE  | 28.41823 | TRUE  |                        |
| GAGTTGT/ db/m1 | db/m | 4270 | 0.013876 | FALSE | 1.1805   | FALSE | Photoreceptor          |
| GAGTTGT db/m1  | db/m | 7672 | 0.018422 | FALSE | 0.465638 | FALSE | Photoreceptor          |
| GAGTTGT db/m1  | db/m | 949  | 0.046025 | FALSE | 55.04543 | TRUE  |                        |
| GAGTTGT db/m1  | db/m | 674  | 0.067388 | FALSE | 1.500281 | FALSE | Photoreceptor          |
| GAGTTGT db/m1  | db/m | 6729 | 0.034334 | FALSE | 0.914599 | FALSE | Photoreceptor          |
| GAGTTGT db/m1  | db/m | 713  | 0.026328 | FALSE | 1.57045  | FALSE | Endothelia Aterial EC  |
| GAGTTGT db/m1  | db/m | 531  | 0.031411 | FALSE | 2.179764 | FALSE | Photoreceptor          |
| GAGTTGT db/m1  | db/m | 672  | 0.060641 | FALSE | 2.022958 | FALSE | Pericyte               |
| GAGTTGT db/m1  | db/m | 1703 | 0.023266 | FALSE | 1.394178 | FALSE | Endothelia Capillary E |
| GAGTTGT db/m1  | db/m | 776  | 0.030859 | FALSE | 1.106503 | FALSE | Photoreceptor          |
| GAGTTTG/ db/m1 | db/m | 535  | 0.064568 | FALSE | 25.38631 | TRUE  |                        |
| GAGTTTG/ db/m1 | db/m | 765  | 0.024971 | FALSE | 2.033276 | FALSE | Endothelia Capillary E |
| GAGTTTG db/m1  | db/m | 529  | 0.041154 | FALSE | 4.622248 | FALSE | Muller cell            |
| GAGTTTG db/m1  | db/m | 1192 | 0.045165 | FALSE | 0.571564 | FALSE | Photoreceptor          |
| GAGTTTG db/m1  | db/m | 882  | 0.032546 | FALSE | 52       | TRUE  |                        |
| GAGTTTG db/m1  | db/m | 1811 | 0.025868 | FALSE | 1.409643 | FALSE | Endothelia Capillary E |
| GAGTTTG db/m1  | db/m | 7461 | 0.040404 | FALSE | 0.968616 | FALSE | Photoreceptor          |
| GATAGAA/ db/m1 | db/m | 2638 | 0.033726 | FALSE | 1.26052  | FALSE | Photoreceptor          |
| GATAGAA/ db/m1 | db/m | 1297 | 0.017434 | FALSE | 1.194453 | FALSE | Endothelia Capillary E |
| GATAGAA db/m1  | db/m | 2884 | 0.016181 | FALSE | 1.135059 | FALSE | Endothelia Capillary E |
| GATAGAA db/m1  | db/m | 5657 | 0.054795 | FALSE | 1.115825 | FALSE | Endothelia Venous EC   |
| GATAGAA db/m1  | db/m | 1985 | 0.020908 | FALSE | 1.437899 | FALSE | Endothelia Capillary E |
| GATAGAA db/m1  | db/m | 559  | 0.045165 | FALSE | 2.906188 | FALSE | Neuron                 |
| GATAGCT/ db/m1 | db/m | 391  | 0.009712 | FALSE | 1.121189 | FALSE | Photoreceptor          |
| GATAGCT/ db/m1 | db/m | 217  | 0.041154 | FALSE | 26.64093 | TRUE  |                        |
| GATAGCT db/m1  | db/m | 4776 | 0.019106 | FALSE | 0.823602 | FALSE | Photoreceptor          |
| GATAGCT db/m1  | db/m | 455  | 0.103567 | TRUE  | 17.55953 | TRUE  |                        |
| GATAGCT db/m1  | db/m | 4467 | 0.075259 | FALSE | 1.022339 | FALSE | Photoreceptor          |
| GATAGCT db/m1  | db/m | 2945 | 0.098234 | FALSE | 1.167196 | FALSE | Photoreceptor          |



|                |      |      |          |       |          |       |                         |
|----------------|------|------|----------|-------|----------|-------|-------------------------|
| GATAGCTT db/m1 | db/m | 1081 | 0.030318 | FALSE | 1.350098 | FALSE | Photoreceptor           |
| GATCACAT db/m1 | db/m | 1696 | 0.028754 | FALSE | 1.394326 | FALSE | Endothelia Capillary EC |
| GATCACAT db/m1 | db/m | 1495 | 0.038251 | FALSE | 1.254131 | FALSE | Photoreceptor           |
| GATCAGT db/m1  | db/m | 3111 | 0.014711 | FALSE | 1.498295 | FALSE | Photoreceptor           |
| GATCAGT db/m1  | db/m | 2334 | 0.075259 | FALSE | 1.793335 | FALSE | Photoreceptor           |
| GATCAGTC db/m1 | db/m | 8557 | 0.020171 | FALSE | 0.661894 | FALSE | Photoreceptor           |
| GATCAGTC db/m1 | db/m | 400  | 0.119124 | TRUE  | 20.42683 | TRUE  |                         |
| GATCAGTC db/m1 | db/m | 462  | 0.023682 | FALSE | 1.28645  | FALSE | Photoreceptor           |
| GATCATG db/m1  | db/m | 510  | 0.038953 | FALSE | 52.443   | TRUE  |                         |
| GATCATGC db/m1 | db/m | 1854 | 0.042704 | FALSE | 1.819521 | FALSE | Endothelia Capillary EC |
| GATCATGT db/m1 | db/m | 506  | 0.048732 | FALSE | 2.570301 | FALSE | Microglia               |
| GATCATGT db/m1 | db/m | 1330 | 0.057037 | FALSE | 1.092548 | FALSE | Photoreceptor           |
| GATCATGT db/m1 | db/m | 8433 | 0.013876 | FALSE | 0.741754 | FALSE | Photoreceptor           |
| GATCCCTA db/m1 | db/m | 939  | 0.027758 | FALSE | 2.172886 | FALSE | Photoreceptor           |
| GATCCCTC db/m1 | db/m | 600  | 0.119124 | TRUE  | 19.07387 | TRUE  |                         |
| GATCCCTC db/m1 | db/m | 671  | 0.025416 | FALSE | 0.783238 | FALSE | Photoreceptor           |
| GATCCCTG db/m1 | db/m | 973  | 0.019455 | FALSE | 1.24478  | FALSE | Endothelia Capillary EC |
| GATCCCTT db/m1 | db/m | 8221 | 0.15354  | TRUE  | 2.262896 | FALSE |                         |
| GATCCCTT db/m1 | db/m | 3753 | 0.016181 | FALSE | 1.065375 | FALSE | Endothelia Venous EC    |
| GATCGTA db/m1  | db/m | 1552 | 0.041154 | FALSE | 1.720636 | FALSE | Photoreceptor           |
| GATCGTA db/m1  | db/m | 1231 | 0.063221 | FALSE | 1.404676 | FALSE | Photoreceptor           |
| GATCGTAC db/m1 | db/m | 1226 | 0.015581 | FALSE | 1.28891  | FALSE | Endothelia Capillary EC |
| GATCGTAC db/m1 | db/m | 425  | 0.021669 | FALSE | 10.45296 | TRUE  |                         |
| GATCGTAC db/m1 | db/m | 764  | 0.029787 | FALSE | 0.817951 | FALSE | Photoreceptor           |
| GATCGTAC db/m1 | db/m | 734  | 0.040404 | FALSE | 2.085353 | FALSE | Microglia               |
| GATCGTAT db/m1 | db/m | 807  | 0.058205 | FALSE | 3.834073 | FALSE | Muller cell             |
| GATGACT db/m1  | db/m | 2738 | 0.036891 | FALSE | 1.819404 | FALSE | Neuron                  |
| GATGACT db/m1  | db/m | 682  | 0.023266 | FALSE | 2.982923 | FALSE | Photoreceptor           |
| GATGACT db/m1  | db/m | 411  | 0.068864 | FALSE | 3.899252 | FALSE | Photoreceptor           |
| GATGACT db/m1  | db/m | 360  | 0.022455 | FALSE | 4.466738 | FALSE | Photoreceptor           |
| GATGACTC db/m1 | db/m | 478  | 0.059406 | FALSE | 3.657117 | FALSE | Photoreceptor           |
| GATGACTC db/m1 | db/m | 4151 | 0.022059 | FALSE | 1.052176 | FALSE | Endothelia Capillary EC |
| GATGACTC db/m1 | db/m | 566  | 0.021286 | FALSE | 1.18496  | FALSE | Photoreceptor           |
| GATGACTC db/m1 | db/m | 561  | 0.013338 | FALSE | 0.482375 | FALSE | Photoreceptor           |
| GATGACTT db/m1 | db/m | 2408 | 0.115723 | TRUE  | 6.05322  | TRUE  |                         |
| GATGACTT db/m1 | db/m | 581  | 0.115723 | TRUE  | 3.264813 | FALSE |                         |
| GATGAGG db/m1  | db/m | 416  | 0.019455 | FALSE | 1.50991  | FALSE | Photoreceptor           |
| GATGAGG db/m1  | db/m | 4158 | 0.046025 | FALSE | 1.344756 | FALSE | Endothelia Venous EC    |
| GATGAGG db/m1  | db/m | 2684 | 0.058205 | FALSE | 1.691412 | FALSE | Photoreceptor           |
| GATGAGG db/m1  | db/m | 1067 | 0.046906 | FALSE | 2.144451 | FALSE | Photoreceptor           |
| GATGAGG db/m1  | db/m | 1082 | 0.03313  | FALSE | 4.518566 | FALSE | Muller cell             |
| GATGAGG db/m1  | db/m | 2043 | 0.011805 | FALSE | 1.226545 | FALSE | Endothelia Aterial EC   |
| GATGATC db/m1  | db/m | 1196 | 0.049679 | FALSE | 1.291524 | FALSE | Photoreceptor           |
| GATGATC db/m1  | db/m | 621  | 0.044326 | FALSE | 3.605187 | FALSE | Muller cell             |
| GATGATC db/m1  | db/m | 623  | 0.024534 | FALSE | 2.529382 | FALSE | Muller cell             |
| GATGATCC db/m1 | db/m | 5025 | 0.016799 | FALSE | 1.209436 | FALSE | Photoreceptor           |
| GATGATCC db/m1 | db/m | 5534 | 0.017758 | FALSE | 1.186056 | FALSE | Photoreceptor           |

|                |      |      |          |       |          |       |                        |
|----------------|------|------|----------|-------|----------|-------|------------------------|
| GATGATCT db/m1 | db/m | 690  | 0.024534 | FALSE | 3.151058 | FALSE | Muller cell            |
| GATGATCT db/m1 | db/m | 6849 | 0.007441 | FALSE | 0.92172  | FALSE | Photoreceptor          |
| GATGCTA db/m1  | db/m | 855  | 0.024971 | FALSE | 0.782453 | FALSE | Photoreceptor          |
| GATGCTA db/m1  | db/m | 5224 | 0.075259 | FALSE | 1.065196 | FALSE | Neuron                 |
| GATGCTAC db/m1 | db/m | 5626 | 0.022857 | FALSE | 1.091905 | FALSE | Photoreceptor          |
| GATGCTAC db/m1 | db/m | 2533 | 0.014997 | FALSE | 1.517902 | FALSE | Photoreceptor          |
| GATGCTAC db/m1 | db/m | 2925 | 0.053718 | FALSE | 1.43141  | FALSE | Photoreceptor          |
| GATGCTAC db/m1 | db/m | 1567 | 0.047807 | FALSE | 2.051299 | FALSE | Endothelia Venous EC   |
| GATGCTAC db/m1 | db/m | 2605 | 0.003649 | FALSE | 1.182111 | FALSE | Neuron                 |
| GATGCTAC db/m1 | db/m | 2296 | 0.047807 | FALSE | 1.519735 | FALSE | Photoreceptor          |
| GATGCTAT db/m1 | db/m | 3681 | 0.070386 | FALSE | 1.361868 | FALSE | Photoreceptor          |
| GATGCTAT db/m1 | db/m | 371  | 0.058205 | FALSE | 4.30332  | FALSE | Muller cell            |
| GATGGAG db/m1  | db/m | 3250 | 0.039671 | FALSE | 1.306618 | FALSE | Photoreceptor          |
| GATGGAG db/m1  | db/m | 4013 | 0.025416 | FALSE | 1.157826 | FALSE | Endothelia Venous EC   |
| GATGGAG db/m1  | db/m | 2450 | 0.071958 | FALSE | 1.461952 | FALSE | Photoreceptor          |
| GATGGAG db/m1  | db/m | 964  | 0.08663  | FALSE | 28.9295  | TRUE  |                        |
| GATGGAG db/m1  | db/m | 7399 | 0.009933 | FALSE | 0.918822 | FALSE | Photoreceptor          |
| GATGGAG db/m1  | db/m | 2563 | 0.059406 | FALSE | 1.365761 | FALSE | Endothelia Venous EC   |
| GATGGAG db/m1  | db/m | 1762 | 0.021286 | FALSE | 1.498051 | FALSE | Endothelia Capillary E |
| GATGGAG db/m1  | db/m | 1007 | 0.015287 | FALSE | 0.746517 | FALSE | Photoreceptor          |
| GATGTTG db/m1  | db/m | 921  | 0.076994 | FALSE | 5.094614 | TRUE  |                        |
| GATGTTG db/m1  | db/m | 512  | 0.035586 | FALSE | 55.24297 | TRUE  |                        |
| GATGTTG db/m1  | db/m | 711  | 0.058205 | FALSE | 1.516497 | FALSE | Photoreceptor          |
| GATGTTG db/m1  | db/m | 845  | 0.011805 | FALSE | 1.552722 | FALSE | Endothelia Capillary E |
| GATGTTG db/m1  | db/m | 2783 | 0.016488 | FALSE | 0.739365 | FALSE | Photoreceptor          |
| GATGTTG db/m1  | db/m | 1151 | 0.028251 | FALSE | 0.69986  | FALSE | Photoreceptor          |
| GATGTTG db/m1  | db/m | 580  | 0.101906 | TRUE  | 4.137931 | FALSE |                        |
| GATGTTG db/m1  | db/m | 1480 | 0.011081 | FALSE | 1.978482 | FALSE | Endothelia Capillary E |
| GATGTTG db/m1  | db/m | 392  | 0.082569 | FALSE | 3.188181 | FALSE | Photoreceptor          |
| GATGTTG db/m1  | db/m | 813  | 0.075259 | FALSE | 6.710854 | TRUE  |                        |
| GATGTTG db/m1  | db/m | 5293 | 0.030318 | FALSE | 0.930829 | FALSE | Photoreceptor          |
| GATGTTG db/m1  | db/m | 902  | 0.119124 | TRUE  | 12.75381 | TRUE  |                        |
| GATGTTG db/m1  | db/m | 1070 | 0.028754 | FALSE | 0.631846 | FALSE | Photoreceptor          |
| GATTGGA db/m1  | db/m | 1593 | 0.035586 | FALSE | 1.155797 | FALSE | Photoreceptor          |
| GATTGGA db/m1  | db/m | 1718 | 0.075259 | FALSE | 5.381575 | TRUE  |                        |
| GATTGGA db/m1  | db/m | 1203 | 0.064568 | FALSE | 0.503482 | FALSE | Photoreceptor          |
| GATTGGA db/m1  | db/m | 4717 | 0.024971 | FALSE | 1.05948  | FALSE | Endothelia Venous EC   |
| GATTGGA db/m1  | db/m | 1123 | 0.031411 | FALSE | 1.988028 | FALSE | Photoreceptor          |
| GATTGGA db/m1  | db/m | 549  | 0.00687  | FALSE | 3.151487 | FALSE | Photoreceptor          |
| GATTGGA db/m1  | db/m | 3020 | 0.028251 | FALSE | 1.61616  | FALSE | Endothelia Venous EC   |
| GATTGGA db/m1  | db/m | 4870 | 0.032546 | FALSE | 1.014434 | FALSE | Endothelia Venous EC   |
| GATTGGA db/m1  | db/m | 520  | 0.061912 | FALSE | 24.56621 | TRUE  |                        |
| GATTGGA db/m1  | db/m | 5586 | 0.022059 | FALSE | 0.926434 | FALSE | Photoreceptor          |
| GATTCTTA db/m1 | db/m | 2747 | 0.013876 | FALSE | 1.282148 | FALSE | Endothelia Capillary E |
| GATTCTTA db/m1 | db/m | 2031 | 0.08663  | FALSE | 1.660449 | FALSE | Photoreceptor          |
| GATTCTTC db/m1 | db/m | 1507 | 0.010384 | FALSE | 1.369391 | FALSE | Endothelia Capillary E |
| GATTCTTC db/m1 | db/m | 816  | 0.034334 | FALSE | 0.625253 | FALSE | Photoreceptor          |

|                |      |      |          |       |          |       |                        |
|----------------|------|------|----------|-------|----------|-------|------------------------|
| GATTCTTC db/m1 | db/m | 2968 | 0.018088 | FALSE | 1.33518  | FALSE | Endothelia Capillary E |
| GATTCTTG db/m1 | db/m | 606  | 0.025868 | FALSE | 0.821924 | FALSE | Photoreceptor          |
| GATTCTTG db/m1 | db/m | 1767 | 0.022857 | FALSE | 1.648017 | FALSE | Photoreceptor          |
| GATTCTTG db/m1 | db/m | 538  | 0.027273 | FALSE | 0.915231 | FALSE | Photoreceptor          |
| GATTCTTG db/m1 | db/m | 3410 | 0.031973 | FALSE | 1.104194 | FALSE | Photoreceptor          |
| GATTCTTG db/m1 | db/m | 923  | 0.023682 | FALSE | 2.417222 | FALSE | Photoreceptor          |
| GATTCTTG db/m1 | db/m | 4301 | 0.020908 | FALSE | 1.00958  | FALSE | Photoreceptor          |
| GATTGGT db/m1  | db/m | 5935 | 0.026796 | FALSE | 0.70986  | FALSE | Photoreceptor          |
| GATTGGT db/m1  | db/m | 1371 | 0.093319 | FALSE | 2.362979 | FALSE | Photoreceptor          |
| GATTGGT db/m1  | db/m | 1719 | 0.025868 | FALSE | 1.546775 | FALSE | Endothelia Capillary E |
| GATTGGT db/m1  | db/m | 5071 | 0.016799 | FALSE | 0.875304 | FALSE | Endothelia Venous EC   |
| GATTGGT db/m1  | db/m | 3130 | 0.034954 | FALSE | 0.955137 | FALSE | Photoreceptor          |
| GATTGGT db/m1  | db/m | 7230 | 0.029266 | FALSE | 0.501604 | FALSE | Photoreceptor          |
| GATTTCTA db/m1 | db/m | 2106 | 0.019455 | FALSE | 0.604173 | FALSE | Photoreceptor          |
| GATTTCTC db/m1 | db/m | 1490 | 0.028754 | FALSE | 1.860953 | FALSE | Endothelia Capillary E |
| GATTTCTG db/m1 | db/m | 1199 | 0.042704 | FALSE | 2.532753 | FALSE | Photoreceptor          |
| GATTTCTG db/m1 | db/m | 1389 | 0.036232 | FALSE | 1.305778 | FALSE | Photoreceptor          |
| GCAACAT db/m1  | db/m | 1322 | 0.109375 | TRUE  | 4.481214 | FALSE |                        |
| GCAACAT db/m1  | db/m | 1118 | 0.067388 | FALSE | 1.749945 | FALSE | Photoreceptor          |
| GCAACAT db/m1  | db/m | 5650 | 0.037564 | FALSE | 1.023941 | FALSE | Photoreceptor          |
| GCAACAT db/m1  | db/m | 3274 | 0.024105 | FALSE | 1.307746 | FALSE | Photoreceptor          |
| GCAACAT db/m1  | db/m | 6013 | 0.016488 | FALSE | 1.044849 | FALSE | Photoreceptor          |
| GCAACAT db/m1  | db/m | 2227 | 0.052669 | FALSE | 1.380911 | FALSE | Photoreceptor          |
| GCAACAT db/m1  | db/m | 7523 | 0.006683 | FALSE | 0.855791 | FALSE | Photoreceptor          |
| GCAACAT db/m1  | db/m | 3639 | 0.08663  | FALSE | 5.729167 | TRUE  |                        |
| GCAACCG db/m1  | db/m | 5195 | 0.047807 | FALSE | 1.063868 | FALSE | Endothelia Capillary E |
| GCAACCG db/m1  | db/m | 611  | 0.018422 | FALSE | 1.557975 | FALSE | Endothelia Capillary E |
| GCAACCG db/m1  | db/m | 872  | 0.009277 | FALSE | 0.564285 | FALSE | Photoreceptor          |
| GCAACCG db/m1  | db/m | 417  | 0.063221 | FALSE | 3.552241 | FALSE | Muller cell            |
| GCACATA db/m1  | db/m | 8186 | 0.012557 | FALSE | 0.862782 | FALSE | Photoreceptor          |
| GCACATA db/m1  | db/m | 3878 | 0.037564 | FALSE | 1.145157 | FALSE | Endothelia Venous EC   |
| GCACATA db/m1  | db/m | 8553 | 0.034954 | FALSE | 0.794433 | FALSE | Photoreceptor          |
| GCACATA db/m1  | db/m | 554  | 0.045165 | FALSE | 4.12123  | FALSE | Photoreceptor          |
| GCACGGT db/m1  | db/m | 1829 | 0.046025 | FALSE | 1.252221 | FALSE | Endothelia Venous EC   |
| GCACGGT db/m1  | db/m | 813  | 0.008032 | FALSE | 2.002726 | FALSE | Endothelia Capillary E |
| GCACGGT db/m1  | db/m | 1885 | 0.054795 | FALSE | 1.010861 | FALSE | Photoreceptor          |
| GCACGGT db/m1  | db/m | 7336 | 0.03313  | FALSE | 1.025477 | FALSE | Photoreceptor          |
| GCACGGT db/m1  | db/m | 4003 | 0.042704 | FALSE | 1.234986 | FALSE | Endothelia Venous EC   |
| GCACGGT db/m1  | db/m | 2710 | 0.018761 | FALSE | 1.355953 | FALSE | Neuron                 |
| GCACGTG db/m1  | db/m | 1171 | 0.068864 | FALSE | 1.452384 | FALSE | Photoreceptor          |
| GCACGTG db/m1  | db/m | 1936 | 0.038251 | FALSE | 5.20571  | TRUE  |                        |
| GCACGTG db/m1  | db/m | 936  | 0.022857 | FALSE | 0.722784 | FALSE | Photoreceptor          |
| GCACGTG db/m1  | db/m | 314  | 0.044326 | FALSE | 2.408427 | FALSE | Muller cell            |
| GCACGTG db/m1  | db/m | 5354 | 0.010384 | FALSE | 1.091664 | FALSE | Photoreceptor          |
| GCACTAA db/m1  | db/m | 3797 | 0.011319 | FALSE | 1.02781  | FALSE | Endothelia Venous EC   |
| GCACTAA db/m1  | db/m | 6300 | 0.008032 | FALSE | 1.06164  | FALSE | Photoreceptor          |
| GCACTAA db/m1  | db/m | 2172 | 0.076994 | FALSE | 1.996687 | FALSE | Photoreceptor          |

|                |      |      |          |       |          |       |                        |
|----------------|------|------|----------|-------|----------|-------|------------------------|
| GCACTAAC db/m1 | db/m | 2656 | 0.036891 | FALSE | 1.253387 | FALSE | Endothelia Venous EC   |
| GCACTAAC db/m1 | db/m | 7088 | 0.357022 | TRUE  | 4.664875 | FALSE |                        |
| GCACTAAC db/m1 | db/m | 557  | 0.015581 | FALSE | 4.488446 | FALSE | Photoreceptor          |
| GCACTAAT db/m1 | db/m | 630  | 0.059406 | FALSE | 0.721943 | FALSE | Photoreceptor          |
| GCAGCCA/ db/m1 | db/m | 507  | 0.13452  | TRUE  | 22.94182 | TRUE  |                        |
| GCAGCCA/ db/m1 | db/m | 6852 | 0.019106 | FALSE | 0.929607 | FALSE | Photoreceptor          |
| GCAGCCA/ db/m1 | db/m | 2197 | 0.003803 | FALSE | 0.773358 | FALSE | Neuron                 |
| GCAGCCA/ db/m1 | db/m | 6186 | 0.015287 | FALSE | 0.92821  | FALSE | Photoreceptor          |
| GCAGCCA( db/m1 | db/m | 611  | 0.073582 | FALSE | 3.326181 | FALSE | Muller cell            |
| GCAGCCA( db/m1 | db/m | 7991 | 0.018088 | FALSE | 0.785759 | FALSE | Photoreceptor          |
| GCAGCCA( db/m1 | db/m | 1524 | 0.054795 | FALSE | 2.573422 | FALSE | Photoreceptor          |
| GCAGCCA( db/m1 | db/m | 529  | 0.035586 | FALSE | 0.686361 | FALSE | Photoreceptor          |
| GCAGCCA\ db/m1 | db/m | 4915 | 0.034334 | FALSE | 0.871578 | FALSE | Photoreceptor          |
| GCAGCCA\ db/m1 | db/m | 9606 | 0.030859 | FALSE | 0.328169 | FALSE | Photoreceptor          |
| GCAGCTG/ db/m1 | db/m | 3103 | 0.044326 | FALSE | 1.315505 | FALSE | Photoreceptor          |
| GCAGCTG/ db/m1 | db/m | 1061 | 0.017434 | FALSE | 0.954756 | FALSE | Photoreceptor          |
| GCAGCTG( db/m1 | db/m | 417  | 0.009712 | FALSE | 4.068006 | FALSE | Muller cell            |
| GCAGCTG( db/m1 | db/m | 7570 | 0.022857 | FALSE | 0.791204 | FALSE | Photoreceptor          |
| GCAGCTG\ db/m1 | db/m | 714  | 0.026328 | FALSE | 4.022459 | FALSE | Muller cell            |
| GCAGGCT/ db/m1 | db/m | 3354 | 0.013338 | FALSE | 1.188038 | FALSE | Endothelia Venous EC   |
| GCAGGCT/ db/m1 | db/m | 384  | 0.088776 | FALSE | 3.389231 | FALSE | Photoreceptor          |
| GCAGGCT( db/m1 | db/m | 4149 | 0.042704 | FALSE | 1.37272  | FALSE | Photoreceptor          |
| GCAGGCT( db/m1 | db/m | 175  | 0.116912 | TRUE  | 0.60423  | FALSE |                        |
| GCAGGCT( db/m1 | db/m | 6341 | 0.012303 | FALSE | 1.236131 | FALSE | Photoreceptor          |
| GCAGTTAC db/m1 | db/m | 1988 | 0.068864 | FALSE | 1.404527 | FALSE | Photoreceptor          |
| GCAGTTAC db/m1 | db/m | 1293 | 0.057037 | FALSE | 4.62978  | FALSE | Muller cell            |
| GCAGTTAC db/m1 | db/m | 1607 | 0.058205 | FALSE | 1.602568 | FALSE | Photoreceptor          |
| GCAGTTAC db/m1 | db/m | 421  | 0.011081 | FALSE | 3.735638 | FALSE | Muller cell            |
| GCAGTTAT db/m1 | db/m | 888  | 0.021286 | FALSE | 0.674861 | FALSE | Photoreceptor          |
| GCAGTTAT db/m1 | db/m | 2938 | 0.043505 | FALSE | 1.01848  | FALSE | Photoreceptor          |
| GCATCGG( db/m1 | db/m | 6806 | 0.024534 | FALSE | 1.151598 | FALSE | Photoreceptor          |
| GCATCGG( db/m1 | db/m | 922  | 0.063221 | FALSE | 1.672331 | FALSE | Photoreceptor          |
| GCATCGG( db/m1 | db/m | 1197 | 0.042704 | FALSE | 1.916492 | FALSE | Photoreceptor          |
| GCATCGG( db/m1 | db/m | 593  | 0.031973 | FALSE | 54.28447 | TRUE  |                        |
| GCATCGG( db/m1 | db/m | 7297 | 0.031973 | FALSE | 0.820594 | FALSE | Photoreceptor          |
| GCATCGG( db/m1 | db/m | 2172 | 0.010614 | FALSE | 1.605248 | FALSE | Photoreceptor          |
| GCATCGG( db/m1 | db/m | 4055 | 0.013074 | FALSE | 1.163075 | FALSE | Photoreceptor          |
| GCATCGG\ db/m1 | db/m | 4128 | 0.013876 | FALSE | 1.207303 | FALSE | Photoreceptor          |
| GCATCTCA db/m1 | db/m | 4426 | 0.045165 | FALSE | 1.397784 | FALSE | Photoreceptor          |
| GCATCTCA db/m1 | db/m | 746  | 0.053718 | FALSE | 3.347659 | FALSE | Muller cell            |
| GCATCTCA db/m1 | db/m | 2279 | 0.070386 | FALSE | 11.07902 | TRUE  |                        |
| GCATCTCA db/m1 | db/m | 1706 | 0.033726 | FALSE | 1.110768 | FALSE | Photoreceptor          |
| GCATCTCC db/m1 | db/m | 422  | 0.040404 | FALSE | 2.044095 | FALSE | Endothelia Capillary E |
| GCATCTCC db/m1 | db/m | 6925 | 0.024534 | FALSE | 0.821272 | FALSE | Photoreceptor          |
| GCATCTCC db/m1 | db/m | 521  | 0.082569 | FALSE | 1.848943 | FALSE | Photoreceptor          |
| GCATCTCC db/m1 | db/m | 982  | 0.009493 | FALSE | 2.020432 | FALSE | Pericyte               |
| GCATCTCC db/m1 | db/m | 1088 | 0.046025 | FALSE | 0.726118 | FALSE | Photoreceptor          |

|                |      |      |          |       |          |       |                         |
|----------------|------|------|----------|-------|----------|-------|-------------------------|
| GCATGATC db/m1 | db/m | 612  | 0.012052 | FALSE | 0.990026 | FALSE | Photoreceptor           |
| GCATGATC db/m1 | db/m | 496  | 0.037564 | FALSE | 2.055566 | FALSE | Photoreceptor           |
| GCATGATC db/m1 | db/m | 930  | 0.034954 | FALSE | 2.043154 | FALSE | Endothelia Venous EC    |
| GCATTAGC db/m1 | db/m | 5267 | 0.031973 | FALSE | 1.03195  | FALSE | Endothelia Capillary EC |
| GCATTAGC db/m1 | db/m | 394  | 0.038953 | FALSE | 2.88773  | FALSE | Photoreceptor           |
| GCATTAGC db/m1 | db/m | 802  | 0.009712 | FALSE | 1.47775  | FALSE | Endothelia Capillary EC |
| GCATTAGC db/m1 | db/m | 430  | 0.026796 | FALSE | 3.277771 | FALSE | Muller cell             |
| GCATTAGC db/m1 | db/m | 1023 | 0.08663  | FALSE | 1.874739 | FALSE | Photoreceptor           |
| GCATTAGC db/m1 | db/m | 1061 | 0.046025 | FALSE | 1.284928 | FALSE | Photoreceptor           |
| GCATTAGC db/m1 | db/m | 2121 | 0.115723 | TRUE  | 8.992007 | TRUE  |                         |
| GCATTAGT db/m1 | db/m | 1690 | 0.025416 | FALSE | 0.501623 | FALSE | Photoreceptor           |
| GCCAACG db/m1  | db/m | 599  | 0.01981  | FALSE | 1.09443  | FALSE | Photoreceptor           |
| GCCAACG db/m1  | db/m | 6579 | 0.008644 | FALSE | 0.958037 | FALSE | Photoreceptor           |
| GCCAACG db/m1  | db/m | 5153 | 0.020171 | FALSE | 0.925911 | FALSE | Endothelia Venous EC    |
| GCCAACG db/m1  | db/m | 762  | 0.021669 | FALSE | 1.089587 | FALSE | Photoreceptor           |
| GCCAACG db/m1  | db/m | 1462 | 0.009933 | FALSE | 1.784203 | FALSE | Photoreceptor           |
| GCCAACG db/m1  | db/m | 2648 | 0.088776 | FALSE | 0.659735 | FALSE | Photoreceptor           |
| GCCAACG db/m1  | db/m | 1360 | 0.026328 | FALSE | 4.183218 | FALSE | Muller cell             |
| GCCAACG db/m1  | db/m | 379  | 0.05065  | FALSE | 56.29887 | TRUE  |                         |
| GCCAGCA db/m1  | db/m | 5915 | 0.026328 | FALSE | 0.934512 | FALSE | Endothelia Venous EC    |
| GCCAGCA db/m1  | db/m | 2039 | 0.017434 | FALSE | 0.990806 | FALSE | Endothelia Aterial EC   |
| GCCAGGT db/m1  | db/m | 1786 | 0.023682 | FALSE | 1.73492  | FALSE | Endothelia Capillary EC |
| GCCAGGT db/m1  | db/m | 3489 | 0.025868 | FALSE | 0.887733 | FALSE | Photoreceptor           |
| GCCAGGT db/m1  | db/m | 2702 | 0.015287 | FALSE | 1.105611 | FALSE | Endothelia Capillary EC |
| GCCAGGT db/m1  | db/m | 4190 | 0.055901 | FALSE | 1.036652 | FALSE | Endothelia Venous EC    |
| GCCAGGT db/m1  | db/m | 888  | 0.053718 | FALSE | 3.30551  | FALSE | Muller cell             |
| GCCAGGT db/m1  | db/m | 2924 | 0.019455 | FALSE | 0.745243 | FALSE | Photoreceptor           |
| GCCAGGT db/m1  | db/m | 1461 | 0.045165 | FALSE | 1.570215 | FALSE | Photoreceptor           |
| GCCAGTG db/m1  | db/m | 3263 | 0.125386 | TRUE  | 3.597413 | FALSE |                         |
| GCCAGTG db/m1  | db/m | 7511 | 0.022455 | FALSE | 0.696355 | FALSE | Photoreceptor           |
| GCCAGTG db/m1  | db/m | 4860 | 0.038953 | FALSE | 0.736609 | FALSE | Neuron                  |
| GCCAGTG db/m1  | db/m | 2845 | 0.020536 | FALSE | 1.326184 | FALSE | Endothelia Venous EC    |
| GCCAGTG db/m1  | db/m | 824  | 0.058205 | FALSE | 3.011423 | FALSE | Photoreceptor           |
| GCCATGG db/m1  | db/m | 3041 | 0.025868 | FALSE | 1.194585 | FALSE | Endothelia Venous EC    |
| GCCATGG db/m1  | db/m | 686  | 0.061912 | FALSE | 45.63107 | TRUE  |                         |
| GCCATGG db/m1  | db/m | 1332 | 0.015879 | FALSE | 0.734578 | FALSE | Photoreceptor           |
| GCCATGG db/m1  | db/m | 7089 | 0.013605 | FALSE | 1.034338 | FALSE | Photoreceptor           |
| GCCATGG db/m1  | db/m | 3901 | 0.003345 | FALSE | 0.829464 | FALSE | Neuron                  |
| GCCATGG db/m1  | db/m | 2378 | 0.052669 | FALSE | 1.84294  | FALSE | Photoreceptor           |
| GCCATTCA db/m1 | db/m | 522  | 0.023682 | FALSE | 0.35426  | FALSE | Photoreceptor           |
| GCCATTCC db/m1 | db/m | 921  | 0.075259 | FALSE | 2.602202 | FALSE | Muller cell             |
| GCCATTCC db/m1 | db/m | 3257 | 0.017434 | FALSE | 0.54971  | FALSE | Photoreceptor           |
| GCCATTCC db/m1 | db/m | 3634 | 0.082569 | FALSE | 1.140301 | FALSE | Photoreceptor           |
| GCCATTCC db/m1 | db/m | 1468 | 0.015287 | FALSE | 1.592971 | FALSE | Endothelia Capillary EC |
| GCCATTCT db/m1 | db/m | 773  | 0.044326 | FALSE | 1.323158 | FALSE | Photoreceptor           |
| GCCATTCT db/m1 | db/m | 3018 | 0.055901 | FALSE | 1.324065 | FALSE | Photoreceptor           |
| GCCATTCT db/m1 | db/m | 5495 | 0.016181 | FALSE | 0.951257 | FALSE | Endothelia Capillary EC |

|                |      |      |          |       |          |       |                        |
|----------------|------|------|----------|-------|----------|-------|------------------------|
| GCCATTCT db/m1 | db/m | 1364 | 0.010384 | FALSE | 0.975118 | FALSE | Photoreceptor          |
| CCCCAGA db/m1  | db/m | 347  | 0.112037 | TRUE  | 3.358645 | FALSE |                        |
| CCCCAGA db/m1  | db/m | 7094 | 0.051646 | FALSE | 1.090951 | FALSE | Photoreceptor          |
| CCCCAGA db/m1  | db/m | 517  | 0.046906 | FALSE | 0.950309 | FALSE | Photoreceptor          |
| CCCCAGA db/m1  | db/m | 2303 | 0.003649 | FALSE | 1.348262 | FALSE | Neuron                 |
| CCCCAGA db/m1  | db/m | 3888 | 0.014151 | FALSE | 1.096288 | FALSE | Endothelia Venous EC   |
| CCCCGAA db/m1  | db/m | 6957 | 0.071958 | FALSE | 0.99254  | FALSE | Photoreceptor          |
| CCCCGAA db/m1  | db/m | 894  | 0.039671 | FALSE | 1.025974 | FALSE | Photoreceptor          |
| CCCCGAA db/m1  | db/m | 8617 | 0.029787 | FALSE | 0.633856 | FALSE | Photoreceptor          |
| GCCGATG db/m1  | db/m | 896  | 0.064568 | FALSE | 1.001256 | FALSE | Photoreceptor          |
| GCCGATG db/m1  | db/m | 2485 | 0.033726 | FALSE | 1.487709 | FALSE | Endothelia Capillary E |
| GCCGATG db/m1  | db/m | 1399 | 0.057037 | FALSE | 1.015041 | FALSE | Photoreceptor          |
| GCCGATG db/m1  | db/m | 800  | 0.054795 | FALSE | 2.317048 | FALSE | Photoreceptor          |
| GCCGATG db/m1  | db/m | 3225 | 0.015879 | FALSE | 1.052253 | FALSE | Endothelia Venous EC   |
| GCCGTGA db/m1  | db/m | 1360 | 0.013876 | FALSE | 1.671933 | FALSE | Endothelia Capillary E |
| GCCGTGA db/m1  | db/m | 760  | 0.057037 | FALSE | 0.872197 | FALSE | Photoreceptor          |
| GCCGTGA db/m1  | db/m | 1277 | 0.051646 | FALSE | 1.524023 | FALSE | Photoreceptor          |
| GCCGTGA db/m1  | db/m | 2261 | 0.008234 | FALSE | 1.059419 | FALSE | Neuron                 |
| GCCTGTTC db/m1 | db/m | 584  | 0.054795 | FALSE | 2.598583 | FALSE | Endothelia Capillary E |
| GCCTGTTC db/m1 | db/m | 782  | 0.034334 | FALSE | 1.977881 | FALSE | Microglia              |
| GCCTGTTC db/m1 | db/m | 1244 | 0.031973 | FALSE | 3.61351  | FALSE | Muller cell            |
| GCCTGTTC db/m1 | db/m | 973  | 0.033726 | FALSE | 1.406195 | FALSE | Photoreceptor          |
| GCCTGTTC db/m1 | db/m | 4368 | 0.026328 | FALSE | 1.154406 | FALSE | Photoreceptor          |
| GCCTGTTT db/m1 | db/m | 1064 | 0.030318 | FALSE | 2.16236  | FALSE | Photoreceptor          |
| GCCTGTTT db/m1 | db/m | 5074 | 0.029266 | FALSE | 0.970413 | FALSE | Photoreceptor          |
| GCCTGTTT db/m1 | db/m | 1803 | 0.033726 | FALSE | 1.922561 | FALSE | Pericyte               |
| GCGAGAA db/m1  | db/m | 407  | 0.043505 | FALSE | 1.140515 | FALSE | Photoreceptor          |
| GCGAGAA db/m1  | db/m | 3229 | 0.070386 | FALSE | 1.058572 | FALSE | Photoreceptor          |
| GCGAGAA db/m1  | db/m | 3155 | 0.041154 | FALSE | 1.247443 | FALSE | Microglia              |
| GCGAGAA db/m1  | db/m | 2231 | 0.020171 | FALSE | 1.008335 | FALSE | Photoreceptor          |
| GCGAGAA db/m1  | db/m | 652  | 0.042704 | FALSE | 55.0283  | TRUE  |                        |
| GCGAGAA db/m1  | db/m | 1117 | 0.036232 | FALSE | 1.455304 | FALSE | Photoreceptor          |
| GCGAGAA db/m1  | db/m | 3830 | 0.022059 | FALSE | 0.941999 | FALSE | Endothelia Venous EC   |
| GCGATCG db/m1  | db/m | 2031 | 0.029787 | FALSE | 1.32175  | FALSE | Neuron                 |
| GCGATCG db/m1  | db/m | 657  | 0.039671 | FALSE | 1.050471 | FALSE | Photoreceptor          |
| GCGATCG db/m1  | db/m | 498  | 0.017114 | FALSE | 3.9106   | FALSE | Muller cell            |
| GCGATCG db/m1  | db/m | 974  | 0.030859 | FALSE | 1.920363 | FALSE | Pericyte               |
| GCGATCG db/m1  | db/m | 958  | 0.009933 | FALSE | 2.00302  | FALSE | Neuron                 |
| GCGATCG db/m1  | db/m | 1643 | 0.028251 | FALSE | 1.361985 | FALSE | Photoreceptor          |
| GCGATCG db/m1  | db/m | 1013 | 0.019455 | FALSE | 2.680102 | FALSE | Neuron                 |
| GCGGAAA db/m1  | db/m | 2332 | 0.032546 | FALSE | 0.56613  | FALSE | Photoreceptor          |
| GCGGAAA db/m1  | db/m | 456  | 0.059406 | FALSE | 1.024348 | FALSE | Photoreceptor          |
| GCGGAAA db/m1  | db/m | 451  | 0.018422 | FALSE | 1.670652 | FALSE | Photoreceptor          |
| GCGGAAA db/m1  | db/m | 3605 | 0.038251 | FALSE | 0.863768 | FALSE | Photoreceptor          |
| GCGGAAA db/m1  | db/m | 3608 | 0.018088 | FALSE | 0.854545 | FALSE | Neuron                 |
| GCGGATC db/m1  | db/m | 8234 | 0.049679 | FALSE | 0.644389 | FALSE | Photoreceptor          |
| GCGGATC db/m1  | db/m | 1624 | 0.063221 | FALSE | 0.813445 | FALSE | Photoreceptor          |

|                |      |      |          |       |          |       |                        |
|----------------|------|------|----------|-------|----------|-------|------------------------|
| GCGGATC(db/m1  | db/m | 8255 | 0.014151 | FALSE | 0.753515 | FALSE | Photoreceptor          |
| GCGGATC(db/m1  | db/m | 635  | 0.192271 | TRUE  | 13.65546 | TRUE  |                        |
| GCGGATC(db/m1  | db/m | 664  | 0.022455 | FALSE | 2.46209  | FALSE | Photoreceptor          |
| GCGGATC db/m1  | db/m | 2481 | 0.040404 | FALSE | 1.341502 | FALSE | Photoreceptor          |
| GCGGATC db/m1  | db/m | 2461 | 0.053718 | FALSE | 1.197957 | FALSE | Endothelia Venous EC   |
| GCGGATC db/m1  | db/m | 1676 | 0.013074 | FALSE | 1.569353 | FALSE | Endothelia Capillary E |
| GCGTGCA(db/m1  | db/m | 6113 | 0.034334 | FALSE | 0.898414 | FALSE | Photoreceptor          |
| GCGTGCA db/m1  | db/m | 477  | 0.067388 | FALSE | 4.983024 | FALSE | Neuron                 |
| GCGTTTCA db/m1 | db/m | 5521 | 0.020171 | FALSE | 1.014475 | FALSE | Photoreceptor          |
| GCGTTTCC db/m1 | db/m | 4942 | 0.051646 | FALSE | 1.142855 | FALSE | Photoreceptor          |
| GCGTTTCC db/m1 | db/m | 2457 | 0.038953 | FALSE | 0.906091 | FALSE | Photoreceptor          |
| GCGTTTCC db/m1 | db/m | 2542 | 0.036891 | FALSE | 1.485675 | FALSE | Photoreceptor          |
| GCGTTTCC db/m1 | db/m | 4105 | 0.046906 | FALSE | 1.393787 | FALSE | Photoreceptor          |
| GCGTTTCT db/m1 | db/m | 514  | 0.164835 | TRUE  | 50.53272 | TRUE  |                        |
| GCTACAA db/m1  | db/m | 2920 | 0.112477 | TRUE  | 10.07625 | TRUE  |                        |
| GCTACAAC db/m1 | db/m | 2431 | 0.013876 | FALSE | 0.933094 | FALSE | Endothelia Venous EC   |
| GCTACAAC db/m1 | db/m | 1015 | 0.021286 | FALSE | 3.62933  | FALSE | Neuron                 |
| GCTACAAC db/m1 | db/m | 2159 | 0.067388 | FALSE | 2.094579 | FALSE | Photoreceptor          |
| GCTACAAT db/m1 | db/m | 4008 | 0.070386 | FALSE | 1.35819  | FALSE | Photoreceptor          |
| GCTACAAT db/m1 | db/m | 708  | 0.126437 | TRUE  | 9.540955 | TRUE  |                        |
| GCTACCTA db/m1 | db/m | 301  | 0.053718 | FALSE | 2.380978 | FALSE | Neuron                 |
| GCTACCTA db/m1 | db/m | 6264 | 0.017434 | FALSE | 0.847172 | FALSE | Photoreceptor          |
| GCTACCTA db/m1 | db/m | 447  | 0.314286 | TRUE  | 11.3354  | TRUE  |                        |
| GCTACCTA db/m1 | db/m | 5671 | 0.025416 | FALSE | 1.090856 | FALSE | Endothelia Venous EC   |
| GCTACCTA db/m1 | db/m | 8264 | 0.023682 | FALSE | 0.7219   | FALSE | Photoreceptor          |
| GCTACCTC db/m1 | db/m | 1397 | 0.031411 | FALSE | 1.90257  | FALSE | Photoreceptor          |
| GCTACCTC db/m1 | db/m | 1219 | 0.021286 | FALSE | 0.982019 | FALSE | Photoreceptor          |
| GCTACCTC db/m1 | db/m | 394  | 0.022455 | FALSE | 68.0564  | TRUE  |                        |
| GCTACCTG db/m1 | db/m | 1044 | 0.025416 | FALSE | 0.924227 | FALSE | Photoreceptor          |
| GCTACCTG db/m1 | db/m | 5270 | 0.068864 | FALSE | 0.910531 | FALSE | Endothelia Venous EC   |
| GCTACCTG db/m1 | db/m | 2529 | 0.071958 | FALSE | 1.78728  | FALSE | Neuron                 |
| GCTCAAA db/m1  | db/m | 3416 | 0.03313  | FALSE | 1.316282 | FALSE | Photoreceptor          |
| GCTCAAAC db/m1 | db/m | 3485 | 0.063221 | FALSE | 0.9698   | FALSE | Neuron                 |
| GCTCAAAC db/m1 | db/m | 3357 | 0.019106 | FALSE | 1.043974 | FALSE | Endothelia Capillary E |
| GCTCAAAT db/m1 | db/m | 3008 | 0.084562 | FALSE | 1.240076 | FALSE | Photoreceptor          |
| GCTCAAAT db/m1 | db/m | 2699 | 0.023266 | FALSE | 0.700218 | FALSE | Photoreceptor          |
| GCTCAAAT db/m1 | db/m | 491  | 0.040404 | FALSE | 3.16674  | FALSE | Muller cell            |
| GCTCAAAT db/m1 | db/m | 456  | 0.049679 | FALSE | 20.14925 | TRUE  |                        |
| GCTGAATC db/m1 | db/m | 1210 | 0.115723 | TRUE  | 4.112554 | FALSE |                        |
| GCTGAATC db/m1 | db/m | 3026 | 0.010384 | FALSE | 1.526383 | FALSE | Photoreceptor          |
| GCTGAATC db/m1 | db/m | 7639 | 0.039671 | FALSE | 0.908485 | FALSE | Photoreceptor          |
| GCTGAATC db/m1 | db/m | 5284 | 0.027273 | FALSE | 0.783677 | FALSE | Photoreceptor          |
| GCTGAATC db/m1 | db/m | 3306 | 0.023266 | FALSE | 1.324894 | FALSE | Endothelia Venous EC   |
| GCTGAATC db/m1 | db/m | 1205 | 0.009712 | FALSE | 1.8636   | FALSE | Endothelia Capillary E |
| GCTGAAT db/m1  | db/m | 4182 | 0.009933 | FALSE | 1.323359 | FALSE | Photoreceptor          |
| GCTGAAT db/m1  | db/m | 1502 | 0.031973 | FALSE | 0.950477 | FALSE | Photoreceptor          |
| GCTGCAGC db/m1 | db/m | 3220 | 0.024105 | FALSE | 0.890888 | FALSE | Photoreceptor          |

|                |      |      |          |       |          |       |                        |
|----------------|------|------|----------|-------|----------|-------|------------------------|
| GCTGCAGT db/m1 | db/m | 641  | 0.017114 | FALSE | 1.193841 | FALSE | Photoreceptor          |
| GCTGGGT db/m1  | db/m | 969  | 0.026796 | FALSE | 1.488135 | FALSE | Photoreceptor          |
| GCTGGGT db/m1  | db/m | 2151 | 0.010846 | FALSE | 1.804429 | FALSE | Photoreceptor          |
| GCTGGGT db/m1  | db/m | 7393 | 0.022059 | FALSE | 0.837483 | FALSE | Photoreceptor          |
| GCTGGGT db/m1  | db/m | 1114 | 0.078788 | FALSE | 1.687755 | FALSE | Photoreceptor          |
| GCTGGGT db/m1  | db/m | 4577 | 0.047807 | FALSE | 0.820943 | FALSE | Photoreceptor          |
| GCTGGGT db/m1  | db/m | 844  | 0.029266 | FALSE | 49.61103 | TRUE  |                        |
| GCTGGGT db/m1  | db/m | 6316 | 0.063221 | FALSE | 0.942364 | FALSE | Neuron                 |
| GCTTCACA db/m1 | db/m | 1391 | 0.008438 | FALSE | 1.052666 | FALSE | Endothelia Capillary E |
| GCTTCACA db/m1 | db/m | 1454 | 0.029266 | FALSE | 1.402233 | FALSE | Photoreceptor          |
| GCTTCACC db/m1 | db/m | 3205 | 0.060641 | FALSE | 1.510861 | FALSE | Photoreceptor          |
| GCTTCACT db/m1 | db/m | 468  | 0.139562 | TRUE  | 4.920635 | FALSE |                        |
| GCTTGGG db/m1  | db/m | 2705 | 0.049679 | FALSE | 1.218087 | FALSE | Endothelia Aterial EC  |
| GCTTGGG db/m1  | db/m | 3989 | 0.038953 | FALSE | 1.091736 | FALSE | Photoreceptor          |
| GCTTGGG db/m1  | db/m | 5447 | 0.031411 | FALSE | 0.868757 | FALSE | Photoreceptor          |
| GCTTGGG db/m1  | db/m | 699  | 0.044326 | FALSE | 2.85381  | FALSE | Neuron                 |
| GCTTGGG db/m1  | db/m | 3204 | 0.037564 | FALSE | 1.079427 | FALSE | Photoreceptor          |
| GCTTGGG db/m1  | db/m | 4262 | 0.032546 | FALSE | 1.057493 | FALSE | Endothelia Capillary E |
| GCTTGGG db/m1  | db/m | 1393 | 0.011081 | FALSE | 1.606372 | FALSE | Endothelia Capillary E |
| GCTTTCGA db/m1 | db/m | 629  | 0.119124 | TRUE  | 28.24232 | TRUE  |                        |
| GCTTTCGC db/m1 | db/m | 7168 | 0.014711 | FALSE | 1.072196 | FALSE | Photoreceptor          |
| GCTTTCGT db/m1 | db/m | 2781 | 0.013876 | FALSE | 0.878673 | FALSE | Photoreceptor          |
| GCTTTCGT db/m1 | db/m | 2656 | 0.058205 | FALSE | 1.07321  | FALSE | Photoreceptor          |
| GCTTTCGT db/m1 | db/m | 7871 | 0.043505 | FALSE | 0.950749 | FALSE | Photoreceptor          |
| GCTTTCGT db/m1 | db/m | 753  | 0.024105 | FALSE | 2.422434 | FALSE | Photoreceptor          |
| GGAACCC db/m1  | db/m | 6759 | 0.041154 | FALSE | 1.00499  | FALSE | Photoreceptor          |
| GGAACCC db/m1  | db/m | 5115 | 0.011319 | FALSE | 1.259547 | FALSE | Photoreceptor          |
| GGAACCC db/m1  | db/m | 2036 | 0.002756 | FALSE | 1.040834 | FALSE | Neuron                 |
| GGAACCC db/m1  | db/m | 922  | 0.057037 | FALSE | 3.774557 | FALSE | Muller cell            |
| GGAACCC db/m1  | db/m | 2525 | 0.064568 | FALSE | 1.484722 | FALSE | Photoreceptor          |
| GGAACCC db/m1  | db/m | 656  | 0.055901 | FALSE | 1.259322 | FALSE | Photoreceptor          |
| GGAAGTG db/m1  | db/m | 3710 | 0.036232 | FALSE | 0.844004 | FALSE | Photoreceptor          |
| GGAAGTG db/m1  | db/m | 1840 | 0.05065  | FALSE | 1.507249 | FALSE | Photoreceptor          |
| GGAAGTG db/m1  | db/m | 2553 | 0.007636 | FALSE | 1.477699 | FALSE | Photoreceptor          |
| GGAATCT db/m1  | db/m | 607  | 0.025868 | FALSE | 2.507533 | FALSE | Muller cell            |
| GGAATCT db/m1  | db/m | 1731 | 0.034334 | FALSE | 0.916276 | FALSE | Photoreceptor          |
| GGAATCT db/m1  | db/m | 2472 | 0.018088 | FALSE | 1.287774 | FALSE | Endothelia Aterial EC  |
| GGAATCT db/m1  | db/m | 943  | 0.075259 | FALSE | 1.963959 | FALSE | Photoreceptor          |
| GGAATGG db/m1  | db/m | 512  | 0.064568 | FALSE | 4.071452 | FALSE | Muller cell            |
| GGAATGG db/m1  | db/m | 572  | 0.038953 | FALSE | 1.967423 | FALSE | Photoreceptor          |
| GGAATGG db/m1  | db/m | 974  | 0.013338 | FALSE | 0.849259 | FALSE | Endothelia Capillary E |
| GGAATGG db/m1  | db/m | 6025 | 0.012814 | FALSE | 1.09241  | FALSE | Photoreceptor          |
| GGAATGG db/m1  | db/m | 4258 | 0.033726 | FALSE | 1.007089 | FALSE | Photoreceptor          |
| GGACGTC db/m1  | db/m | 342  | 0.052669 | FALSE | 4.014622 | FALSE | Muller cell            |
| GGACGTC db/m1  | db/m | 3748 | 0.126437 | TRUE  | 4.925251 | FALSE |                        |
| GGACGTC db/m1  | db/m | 785  | 0.010157 | FALSE | 2.683849 | FALSE | Endothelia Capillary E |
| GGACGTC db/m1  | db/m | 2090 | 0.018422 | FALSE | 1.316355 | FALSE | Endothelia Aterial EC  |



|         |       |      |      |          |       |          |       |                        |
|---------|-------|------|------|----------|-------|----------|-------|------------------------|
| GGACGTC | db/m1 | db/m | 620  | 0.05065  | FALSE | 22.98196 | TRUE  |                        |
| GGACGTC | db/m1 | db/m | 2041 | 0.076994 | FALSE | 1.509258 | FALSE | Photoreceptor          |
| GGACGTC | db/m1 | db/m | 875  | 0.184701 | TRUE  | 3.145104 | FALSE |                        |
| GGACGTC | db/m1 | db/m | 6591 | 0.025416 | FALSE | 0.733192 | FALSE | Photoreceptor          |
| GGACGTC | db/m1 | db/m | 1240 | 0.009712 | FALSE | 1.769997 | FALSE | Endothelia Capillary E |
| GGAGAAC | db/m1 | db/m | 392  | 0.039671 | FALSE | 1.582013 | FALSE | Photoreceptor          |
| GGAGAAC | db/m1 | db/m | 761  | 0.080645 | FALSE | 27.38095 | TRUE  |                        |
| GGAGAAC | db/m1 | db/m | 2879 | 0.054795 | FALSE | 1.386207 | FALSE | Photoreceptor          |
| GGAGAAC | db/m1 | db/m | 1692 | 0.043505 | FALSE | 1.76735  | FALSE | Photoreceptor          |
| GGAGAAC | db/m1 | db/m | 1054 | 0.034334 | FALSE | 1.296873 | FALSE | Photoreceptor          |
| GGAGAAC | db/m1 | db/m | 581  | 0.093319 | FALSE | 3.570606 | FALSE | Muller cell            |
| GGAGAAC | db/m1 | db/m | 750  | 0.098234 | FALSE | 2.595019 | FALSE | Photoreceptor          |
| GGAGAAC | db/m1 | db/m | 5928 | 0.13452  | TRUE  | 1.78829  | FALSE |                        |
| GGAGATG | db/m1 | db/m | 936  | 0.035586 | FALSE | 1.408563 | FALSE | Photoreceptor          |
| GGAGATG | db/m1 | db/m | 1436 | 0.025868 | FALSE | 1.208263 | FALSE | Endothelia Capillary E |
| GGAGATG | db/m1 | db/m | 1642 | 0.084562 | FALSE | 1.210358 | FALSE | Photoreceptor          |
| GGAGATG | db/m1 | db/m | 820  | 0.035586 | FALSE | 1.378142 | FALSE | Photoreceptor          |
| GGAGATG | db/m1 | db/m | 4181 | 0.143501 | TRUE  | 3.069906 | FALSE |                        |
| GGAGATG | db/m1 | db/m | 2846 | 0.106408 | TRUE  | 9.217877 | TRUE  |                        |
| GGAGCAA | db/m1 | db/m | 1376 | 0.027273 | FALSE | 2.088284 | FALSE | Photoreceptor          |
| GGAGCAA | db/m1 | db/m | 5021 | 0.032546 | FALSE | 0.596862 | FALSE | Photoreceptor          |
| GGAGCAA | db/m1 | db/m | 739  | 0.041154 | FALSE | 0.89451  | FALSE | Photoreceptor          |
| GGAGGAT | db/m1 | db/m | 660  | 0.049679 | FALSE | 1.727382 | FALSE | Photoreceptor          |
| GGAGGAT | db/m1 | db/m | 2835 | 0.019455 | FALSE | 1.364705 | FALSE | Endothelia Capillary E |
| GGAGGAT | db/m1 | db/m | 1683 | 0.049679 | FALSE | 2.046205 | FALSE | Endothelia Capillary E |
| GGAGGAT | db/m1 | db/m | 477  | 0.033726 | FALSE | 1.699562 | FALSE | Photoreceptor          |
| GGAGGAT | db/m1 | db/m | 338  | 0.031973 | FALSE | 3.910185 | FALSE | Muller cell            |
| GGAGGAT | db/m1 | db/m | 585  | 0.064568 | FALSE | 46.14856 | TRUE  |                        |
| GGAGGAT | db/m1 | db/m | 738  | 0.098234 | FALSE | 2.144872 | FALSE | Photoreceptor          |
| GGAGGAT | db/m1 | db/m | 352  | 0.027758 | FALSE | 4.543414 | FALSE | Endothelia Capillary E |
| GGAGGAT | db/m1 | db/m | 410  | 0.078788 | FALSE | 33.83152 | TRUE  |                        |
| GGAGGAT | db/m1 | db/m | 1660 | 0.052669 | FALSE | 2.183969 | FALSE | Photoreceptor          |
| GGAGGTA | db/m1 | db/m | 1891 | 0.021286 | FALSE | 1.51419  | FALSE | Endothelia Capillary E |
| GGAGGTA | db/m1 | db/m | 2263 | 0.035586 | FALSE | 1.652443 | FALSE | Endothelia Capillary E |
| GGAGGTA | db/m1 | db/m | 2509 | 0.047807 | FALSE | 1.745477 | FALSE | Endothelia Capillary E |
| GGAGGTA | db/m1 | db/m | 1041 | 0.030859 | FALSE | 1.674973 | FALSE | Photoreceptor          |
| GGAGGTA | db/m1 | db/m | 412  | 0.015581 | FALSE | 3.442368 | FALSE | Photoreceptor          |
| GGAGGTA | db/m1 | db/m | 4362 | 0.016488 | FALSE | 1.166612 | FALSE | Endothelia Venous EC   |
| GGAGGTA | db/m1 | db/m | 5856 | 0.048732 | FALSE | 1.165465 | FALSE | Photoreceptor          |
| GGAGGTA | db/m1 | db/m | 431  | 0.047807 | FALSE | 1.368972 | FALSE | Photoreceptor          |
| GGAGGTA | db/m1 | db/m | 1391 | 0.014151 | FALSE | 1.635688 | FALSE | Endothelia Aterial EC  |
| GGAGGTA | db/m1 | db/m | 431  | 0.04192  | FALSE | 63.06146 | TRUE  |                        |
| GGAGGTA | db/m1 | db/m | 1414 | 0.012814 | FALSE | 3.742465 | FALSE | Muller cell            |
| GGATCTA | db/m1 | db/m | 2139 | 0.01981  | FALSE | 1.366207 | FALSE | Endothelia Capillary E |
| GGATCTA | db/m1 | db/m | 468  | 0.022059 | FALSE | 0.795347 | FALSE | Photoreceptor          |
| GGATCTA | db/m1 | db/m | 3497 | 0.010846 | FALSE | 1.192583 | FALSE | Endothelia Venous EC   |
| GGATCTA | db/m1 | db/m | 1202 | 0.022857 | FALSE | 1.419837 | FALSE | Photoreceptor          |

|                |      |      |          |       |          |       |                        |
|----------------|------|------|----------|-------|----------|-------|------------------------|
| GGATCTA/ db/m1 | db/m | 1800 | 0.031973 | FALSE | 1.648622 | FALSE | Endothelia Venous EC   |
| GGATCTA/ db/m1 | db/m | 1794 | 0.027273 | FALSE | 1.150833 | FALSE | Photoreceptor          |
| GGATCTA( db/m1 | db/m | 1313 | 0.128582 | TRUE  | 1.20259  | FALSE |                        |
| GGATCTA\ db/m1 | db/m | 5686 | 0.014429 | FALSE | 1.08536  | FALSE | Photoreceptor          |
| GGATCTA\ db/m1 | db/m | 1716 | 0.044326 | FALSE | 1.056632 | FALSE | Microglia              |
| GGATGTT( db/m1 | db/m | 4703 | 0.064568 | FALSE | 1.173566 | FALSE | Photoreceptor          |
| GGATGTT\ db/m1 | db/m | 3426 | 0.014151 | FALSE | 1.434449 | FALSE | Photoreceptor          |
| GGATGTT\ db/m1 | db/m | 2840 | 0.059406 | FALSE | 1.701719 | FALSE | Endothelia Venous EC   |
| GGATGTT\ db/m1 | db/m | 3067 | 0.058205 | FALSE | 0.763871 | FALSE | Photoreceptor          |
| GGCACGT/ db/m1 | db/m | 4931 | 0.073582 | FALSE | 1.06001  | FALSE | Photoreceptor          |
| GGCACGT/ db/m1 | db/m | 369  | 0.022857 | FALSE | 3.015159 | FALSE | Photoreceptor          |
| GGCACGT/ db/m1 | db/m | 836  | 0.038251 | FALSE | 3.230004 | FALSE | Muller cell            |
| GGCACGT( db/m1 | db/m | 386  | 0.036891 | FALSE | 2.298434 | FALSE | Pericyte               |
| GGCACGT( db/m1 | db/m | 759  | 0.030318 | FALSE | 0.965742 | FALSE | Photoreceptor          |
| GGCACGT\ db/m1 | db/m | 1582 | 0.095727 | FALSE | 1.464912 | FALSE | Photoreceptor          |
| GGCAGTC/ db/m1 | db/m | 443  | 0.058205 | FALSE | 3.594244 | FALSE | Muller cell            |
| GGCAGTC/ db/m1 | db/m | 4058 | 0.027273 | FALSE | 0.616757 | FALSE | Photoreceptor          |
| GGCAGTC( db/m1 | db/m | 5029 | 0.043505 | FALSE | 1.224056 | FALSE | Photoreceptor          |
| GGCAGTC( db/m1 | db/m | 1071 | 0.054795 | FALSE | 1.139661 | FALSE | Photoreceptor          |
| GGCAGTC( db/m1 | db/m | 428  | 0.015879 | FALSE | 4.423048 | FALSE | Muller cell            |
| GGCAGTC( db/m1 | db/m | 2708 | 0.027758 | FALSE | 1.369779 | FALSE | Photoreceptor          |
| GGCAGTC\ db/m1 | db/m | 765  | 0.034954 | FALSE | 2.7599   | FALSE | Endothelia Capillary E |
| GGCGTCA( db/m1 | db/m | 1093 | 0.013876 | FALSE | 1.476826 | FALSE | Endothelia Capillary E |
| GGCGTCA( db/m1 | db/m | 545  | 0.068864 | FALSE | 3.935037 | FALSE | Photoreceptor          |
| GGCGTCA( db/m1 | db/m | 8351 | 0.024105 | FALSE | 0.808827 | FALSE | Photoreceptor          |
| GGCGTCA\ db/m1 | db/m | 2875 | 0.024971 | FALSE | 1.082193 | FALSE | Endothelia Venous EC   |
| GGCGTCA\ db/m1 | db/m | 1429 | 0.015879 | FALSE | 1.962205 | FALSE | Endothelia Aterial EC  |
| GGCGTCA\ db/m1 | db/m | 437  | 0.078788 | FALSE | 4.661865 | FALSE | Muller cell            |
| GGCTGTG/ db/m1 | db/m | 171  | 0.112037 | TRUE  | 0.385505 | FALSE |                        |
| GGCTGTG( db/m1 | db/m | 406  | 0.016488 | FALSE | 2.424985 | FALSE | Photoreceptor          |
| GGCTGTG( db/m1 | db/m | 2643 | 0.019455 | FALSE | 0.924127 | FALSE | Photoreceptor          |
| GGCTGTG\ db/m1 | db/m | 2121 | 0.091004 | FALSE | 0.966328 | FALSE | Photoreceptor          |
| GGCTTGG/ db/m1 | db/m | 586  | 0.012557 | FALSE | 1.701987 | FALSE | Muller cell            |
| GGCTTGG( db/m1 | db/m | 513  | 0.010846 | FALSE | 0.777782 | FALSE | Photoreceptor          |
| GGCTTGG( db/m1 | db/m | 438  | 0.046025 | FALSE | 1.222388 | FALSE | Photoreceptor          |
| GGCTTGG( db/m1 | db/m | 2350 | 0.017114 | FALSE | 1.348276 | FALSE | Neuron                 |
| GGCTTGG( db/m1 | db/m | 813  | 0.047807 | FALSE | 4.308791 | FALSE | Muller cell            |
| GGCTTGG( db/m1 | db/m | 1188 | 0.054795 | FALSE | 1.545084 | FALSE | Photoreceptor          |
| GGCTTGG( db/m1 | db/m | 8221 | 0.018761 | FALSE | 0.910775 | FALSE | Photoreceptor          |
| GGCTTGG\ db/m1 | db/m | 529  | 0.112477 | TRUE  | 17.54601 | TRUE  |                        |
| GGCTTGG\ db/m1 | db/m | 944  | 0.027758 | FALSE | 0.980003 | FALSE | Photoreceptor          |
| GGCTTTCA db/m1 | db/m | 4742 | 0.024971 | FALSE | 1.109142 | FALSE | Photoreceptor          |
| GGCTTTCA db/m1 | db/m | 7156 | 0.008644 | FALSE | 1.124738 | FALSE | Photoreceptor          |
| GGCTTTCC db/m1 | db/m | 377  | 0.05065  | FALSE | 7.75348  | TRUE  |                        |
| GGCTTTCC db/m1 | db/m | 4170 | 0.033726 | FALSE | 1.181991 | FALSE | Endothelia Venous EC   |
| GGCTTTCC db/m1 | db/m | 4796 | 0.038251 | FALSE | 1.147807 | FALSE | Photoreceptor          |
| GGCTTTCC db/m1 | db/m | 1152 | 0.028754 | FALSE | 2.542216 | FALSE | Muller cell            |

|                |      |      |          |       |          |       |                        |
|----------------|------|------|----------|-------|----------|-------|------------------------|
| GGCTTTCC db/m1 | db/m | 2909 | 0.030318 | FALSE | 1.512425 | FALSE | Photoreceptor          |
| GGCTTTCC db/m1 | db/m | 401  | 0.071958 | FALSE | 3.496085 | FALSE | Photoreceptor          |
| GGCTTTCT db/m1 | db/m | 6724 | 0.08663  | FALSE | 0.84872  | FALSE | Neuron                 |
| GGCTTTCT db/m1 | db/m | 2656 | 0.082569 | FALSE | 1.332487 | FALSE | Photoreceptor          |
| GGCTTTCT db/m1 | db/m | 1322 | 0.031973 | FALSE | 1.850251 | FALSE | Endothelia Capillary E |
| GGCTTTCT db/m1 | db/m | 3310 | 0.040404 | FALSE | 1.224979 | FALSE | Endothelia Capillary E |
| GGGAAGT db/m1  | db/m | 7415 | 0.039671 | FALSE | 0.805797 | FALSE | Photoreceptor          |
| GGGAAGT db/m1  | db/m | 1359 | 0.029787 | FALSE | 1.068927 | FALSE | Photoreceptor          |
| GGGAAGT db/m1  | db/m | 1311 | 0.023682 | FALSE | 1.452483 | FALSE | Photoreceptor          |
| GGGAAGT db/m1  | db/m | 2582 | 0.053718 | FALSE | 1.393023 | FALSE | Photoreceptor          |
| GGGACAA db/m1  | db/m | 2363 | 0.029787 | FALSE | 1.870451 | FALSE | Neuron                 |
| GGGACAA db/m1  | db/m | 7522 | 0.030859 | FALSE | 0.826794 | FALSE | Photoreceptor          |
| GGGACAA db/m1  | db/m | 4756 | 0.073582 | FALSE | 1.556705 | FALSE | Photoreceptor          |
| GGGACAA db/m1  | db/m | 2107 | 0.004436 | FALSE | 0.94878  | FALSE | Neuron                 |
| GGGACAA db/m1  | db/m | 4477 | 0.040404 | FALSE | 1.499745 | FALSE | Photoreceptor          |
| GGGACCT db/m1  | db/m | 2141 | 0.005435 | FALSE | 1.731837 | FALSE | Neuron                 |
| GGGACCT db/m1  | db/m | 5137 | 0.018088 | FALSE | 0.851232 | FALSE | Photoreceptor          |
| GGGACCT db/m1  | db/m | 922  | 0.064568 | FALSE | 1.722331 | FALSE | Photoreceptor          |
| GGGACCT db/m1  | db/m | 4986 | 0.025416 | FALSE | 1.001875 | FALSE | Photoreceptor          |
| GGGACTC db/m1  | db/m | 2196 | 0.055901 | FALSE | 2.082988 | FALSE | Photoreceptor          |
| GGGACTC db/m1  | db/m | 1085 | 0.031973 | FALSE | 1.239508 | FALSE | Photoreceptor          |
| GGGACTC db/m1  | db/m | 1062 | 0.063221 | FALSE | 12.75014 | TRUE  |                        |
| GGGACTC db/m1  | db/m | 1294 | 0.053718 | FALSE | 1.486083 | FALSE | Photoreceptor          |
| GGGACTC db/m1  | db/m | 1947 | 0.060641 | FALSE | 1.692803 | FALSE | Photoreceptor          |
| GGGACTC db/m1  | db/m | 3519 | 0.022059 | FALSE | 1.252663 | FALSE | Endothelia Capillary E |
| GGGACTC db/m1  | db/m | 1159 | 0.036232 | FALSE | 1.268314 | FALSE | Photoreceptor          |
| GGGACTC db/m1  | db/m | 718  | 0.126437 | TRUE  | 11.96347 | TRUE  |                        |
| GGGACTC db/m1  | db/m | 1103 | 0.01981  | FALSE | 2.053488 | FALSE | Endothelia Capillary E |
| GGGACTC db/m1  | db/m | 2190 | 0.031411 | FALSE | 1.818454 | FALSE | Pericyte               |
| GGGACTC db/m1  | db/m | 952  | 0.023682 | FALSE | 2.428941 | FALSE | Photoreceptor          |
| GGGACTC db/m1  | db/m | 2485 | 0.015879 | FALSE | 1.241909 | FALSE | Endothelia Aterial EC  |
| GGGAGAT db/m1  | db/m | 672  | 0.035586 | FALSE | 49.27938 | TRUE  |                        |
| GGGAGAT db/m1  | db/m | 1002 | 0.034334 | FALSE | 1.2565   | FALSE | Photoreceptor          |
| GGGAGAT db/m1  | db/m | 447  | 0.023682 | FALSE | 2.335719 | FALSE | Endothelia Capillary E |
| GGGAGAT db/m1  | db/m | 2185 | 0.048732 | FALSE | 1.354451 | FALSE | Photoreceptor          |
| GGGAGAT db/m1  | db/m | 5207 | 0.164835 | TRUE  | 2.687657 | FALSE |                        |
| GGGAGTA db/m1  | db/m | 5307 | 0.016181 | FALSE | 0.982018 | FALSE | Photoreceptor          |
| GGGAGTA db/m1  | db/m | 3118 | 0.098234 | FALSE | 1.843628 | FALSE | Neuron                 |
| GGGAGTA db/m1  | db/m | 2082 | 0.106408 | TRUE  | 5.752416 | TRUE  |                        |
| GGGAGTA db/m1  | db/m | 1424 | 0.021286 | FALSE | 1.569426 | FALSE | Endothelia Capillary E |
| GGGAGTA db/m1  | db/m | 2198 | 0.029266 | FALSE | 1.057522 | FALSE | Photoreceptor          |
| GGGAGTA db/m1  | db/m | 3995 | 0.025416 | FALSE | 1.186319 | FALSE | Endothelia Venous EC   |
| GGGATCC db/m1  | db/m | 1938 | 0.080645 | FALSE | 1.41377  | FALSE | Endothelia Capillary E |
| GGGATCC db/m1  | db/m | 1407 | 0.200401 | TRUE  | 20.79479 | TRUE  |                        |
| GGGATCC db/m1  | db/m | 578  | 0.008032 | FALSE | 2.359613 | FALSE | Photoreceptor          |
| GGGATCC db/m1  | db/m | 6191 | 0.022455 | FALSE | 0.773553 | FALSE | Photoreceptor          |
| GGGATCC db/m1  | db/m | 5495 | 0.026328 | FALSE | 1.08132  | FALSE | Photoreceptor          |

|         |       |      |      |          |       |          |       |                         |
|---------|-------|------|------|----------|-------|----------|-------|-------------------------|
| GGGATCC | db/m1 | db/m | 5796 | 0.040404 | FALSE | 0.986423 | FALSE | Photoreceptor           |
| GGGATCC | db/m1 | db/m | 1729 | 0.018761 | FALSE | 0.544361 | FALSE | Photoreceptor           |
| GGGATGA | db/m1 | db/m | 3457 | 0.143501 | TRUE  | 11.98147 | TRUE  |                         |
| GGGATGA | db/m1 | db/m | 1112 | 0.038953 | FALSE | 0.670446 | FALSE | Photoreceptor           |
| GGGATGA | db/m1 | db/m | 1117 | 0.017434 | FALSE | 0.306756 | FALSE | Photoreceptor           |
| GGGATGA | db/m1 | db/m | 739  | 0.030859 | FALSE | 1.0601   | FALSE | Photoreceptor           |
| GGGATGA | db/m1 | db/m | 1199 | 0.015287 | FALSE | 0.998951 | FALSE | Photoreceptor           |
| GGGATGA | db/m1 | db/m | 498  | 0.112037 | TRUE  | 1.148325 | FALSE |                         |
| GGGCCAT | db/m1 | db/m | 478  | 0.012814 | FALSE | 0.928059 | FALSE | Photoreceptor           |
| GGGCCAT | db/m1 | db/m | 4121 | 0.030859 | FALSE | 1.029244 | FALSE | Endothelia Venous EC    |
| GGGCCAT | db/m1 | db/m | 1048 | 0.040404 | FALSE | 3.5386   | FALSE | Muller cell             |
| GGGCCAT | db/m1 | db/m | 5548 | 0.037564 | FALSE | 1.139799 | FALSE | Photoreceptor           |
| GGGCCAT | db/m1 | db/m | 1387 | 0.046906 | FALSE | 0.738943 | FALSE | Photoreceptor           |
| GGGCCAT | db/m1 | db/m | 4151 | 0.039671 | FALSE | 1.388703 | FALSE | Photoreceptor           |
| GGGCCAT | db/m1 | db/m | 1063 | 0.047807 | FALSE | 2.216884 | FALSE | Photoreceptor           |
| GGGCCAT | db/m1 | db/m | 1710 | 0.067388 | FALSE | 1.920264 | FALSE | Pericyte                |
| GGGCGTT | db/m1 | db/m | 3006 | 0.011805 | FALSE | 1.067285 | FALSE | Endothelia Aterial EC   |
| GGGCGTT | db/m1 | db/m | 419  | 0.036891 | FALSE | 2.682183 | FALSE | Photoreceptor           |
| GGGCGTT | db/m1 | db/m | 3546 | 0.061912 | FALSE | 1.302113 | FALSE | Photoreceptor           |
| GGGCGTT | db/m1 | db/m | 2894 | 0.04192  | FALSE | 1.313712 | FALSE | Photoreceptor           |
| GGGCGTT | db/m1 | db/m | 3634 | 0.031411 | FALSE | 1.038227 | FALSE | Endothelia Capillary EC |
| GGGCGTT | db/m1 | db/m | 7766 | 0.023682 | FALSE | 0.698388 | FALSE | Photoreceptor           |
| GGGCGTT | db/m1 | db/m | 526  | 0.023682 | FALSE | 2.159108 | FALSE | Endothelia Capillary EC |
| GGGCGTT | db/m1 | db/m | 2083 | 0.137569 | TRUE  | 3.179852 | FALSE |                         |
| GGGCGTT | db/m1 | db/m | 876  | 0.078788 | FALSE | 14.88694 | TRUE  |                         |
| GGGCGTT | db/m1 | db/m | 447  | 0.067388 | FALSE | 4.344126 | FALSE | Photoreceptor           |
| GGGCTAC | db/m1 | db/m | 4413 | 0.031973 | FALSE | 1.194814 | FALSE | Endothelia Venous EC    |
| GGGCTAC | db/m1 | db/m | 5743 | 0.020908 | FALSE | 1.144361 | FALSE | Photoreceptor           |
| GGGCTAC | db/m1 | db/m | 2840 | 0.038953 | FALSE | 1.582944 | FALSE | Pericyte                |
| GGGCTAC | db/m1 | db/m | 4155 | 0.029787 | FALSE | 1.06473  | FALSE | Photoreceptor           |
| GGGCTAC | db/m1 | db/m | 487  | 0.037564 | FALSE | 0.549722 | FALSE | Photoreceptor           |
| GGGCTAC | db/m1 | db/m | 5698 | 0.130374 | TRUE  | 2.010134 | FALSE |                         |
| GGGCTAC | db/m1 | db/m | 994  | 0.046025 | FALSE | 1.843951 | FALSE | Photoreceptor           |
| GGGCTAC | db/m1 | db/m | 1320 | 0.059406 | FALSE | 0.96046  | FALSE | Photoreceptor           |
| GGGCTAC | db/m1 | db/m | 3852 | 0.025416 | FALSE | 1.119812 | FALSE | Neuron                  |
| GGGCTAC | db/m1 | db/m | 1240 | 0.030859 | FALSE | 2.636125 | FALSE | Photoreceptor           |
| GGGCTAC | db/m1 | db/m | 4334 | 0.059406 | FALSE | 1.400227 | FALSE | Photoreceptor           |
| GGGCTCA | db/m1 | db/m | 1452 | 0.021286 | FALSE | 0.974241 | FALSE | Endothelia Capillary EC |
| GGGCTCA | db/m1 | db/m | 966  | 0.05065  | FALSE | 3.306662 | FALSE | Muller cell             |
| GGGCTCA | db/m1 | db/m | 434  | 0.019455 | FALSE | 2.2553   | FALSE | Photoreceptor           |
| GGGCTCA | db/m1 | db/m | 615  | 0.036232 | FALSE | 4.224601 | FALSE | Muller cell             |
| GGGCTCA | db/m1 | db/m | 7340 | 0.018088 | FALSE | 1.069321 | FALSE | Photoreceptor           |
| GGGCTCA | db/m1 | db/m | 3957 | 0.012557 | FALSE | 1.123479 | FALSE | Endothelia Capillary EC |
| GGGCTCA | db/m1 | db/m | 1078 | 0.011561 | FALSE | 1.53546  | FALSE | Endothelia Capillary EC |
| GGGCTCA | db/m1 | db/m | 4772 | 0.017758 | FALSE | 1.196175 | FALSE | Photoreceptor           |
| GGGTAGA | db/m1 | db/m | 5867 | 0.034954 | FALSE | 0.973811 | FALSE | Photoreceptor           |
| GGGTAGA | db/m1 | db/m | 720  | 0.080645 | FALSE | 2.240727 | FALSE | Pericyte                |

|               |      |      |          |       |          |       |                        |
|---------------|------|------|----------|-------|----------|-------|------------------------|
| GGGTAGA db/m1 | db/m | 3110 | 0.119124 | TRUE  | 8.009458 | TRUE  |                        |
| GGGTAGA db/m1 | db/m | 2349 | 0.007636 | FALSE | 1.370161 | FALSE | Photoreceptor          |
| GGGTAGA db/m1 | db/m | 5385 | 0.03313  | FALSE | 0.989868 | FALSE | Endothelia Venous EC   |
| GGGTATT db/m1 | db/m | 4026 | 0.357022 | TRUE  | 5.27662  | TRUE  |                        |
| GGGTATT db/m1 | db/m | 530  | 0.035586 | FALSE | 1.72301  | FALSE | Photoreceptor          |
| GGGTATT db/m1 | db/m | 1247 | 0.091004 | FALSE | 2.782105 | FALSE | Muller cell            |
| GGGTATT db/m1 | db/m | 674  | 0.060641 | FALSE | 11.25    | TRUE  |                        |
| GGGTATT db/m1 | db/m | 474  | 0.033726 | FALSE | 39.36842 | TRUE  |                        |
| GGGTATT db/m1 | db/m | 3489 | 0.024105 | FALSE | 0.78272  | FALSE | Photoreceptor          |
| GGGTCAC db/m1 | db/m | 553  | 0.024534 | FALSE | 0.598401 | FALSE | Photoreceptor          |
| GGGTCAC db/m1 | db/m | 3519 | 0.013074 | FALSE | 1.000048 | FALSE | Endothelia Venous EC   |
| GGGTCAC db/m1 | db/m | 6284 | 0.043505 | FALSE | 1.105566 | FALSE | Photoreceptor          |
| GGGTCAC db/m1 | db/m | 4695 | 0.023682 | FALSE | 0.749668 | FALSE | Photoreceptor          |
| GGGTCAC db/m1 | db/m | 1121 | 0.020536 | FALSE | 0.727175 | FALSE | Photoreceptor          |
| GGGTCTG db/m1 | db/m | 2688 | 0.082569 | FALSE | 1.206005 | FALSE | Endothelia Venous EC   |
| GGGTCTG db/m1 | db/m | 2165 | 0.084562 | FALSE | 1.672948 | FALSE | Photoreceptor          |
| GGGTCTG db/m1 | db/m | 334  | 0.093319 | FALSE | 4.45137  | FALSE | Muller cell            |
| GGGTCTG db/m1 | db/m | 2510 | 0.030859 | FALSE | 1.215041 | FALSE | Endothelia Venous EC   |
| GGGTCTG db/m1 | db/m | 1864 | 0.061912 | FALSE | 1.447631 | FALSE | Photoreceptor          |
| GGGTCTG db/m1 | db/m | 906  | 0.024105 | FALSE | 2.100147 | FALSE | Photoreceptor          |
| GGGTCTG db/m1 | db/m | 429  | 0.022857 | FALSE | 2.805478 | FALSE | Photoreceptor          |
| GGGTCTG db/m1 | db/m | 4849 | 0.148377 | TRUE  | 8.250984 | TRUE  |                        |
| GGGTCTG db/m1 | db/m | 2407 | 0.030859 | FALSE | 1.080267 | FALSE | Microglia              |
| GGGTCTG db/m1 | db/m | 3669 | 0.053718 | FALSE | 1.524545 | FALSE | Photoreceptor          |
| GGGTGAA db/m1 | db/m | 1115 | 0.084562 | FALSE | 1.834413 | FALSE | Photoreceptor          |
| GGGTGAA db/m1 | db/m | 3226 | 0.055901 | FALSE | 1.414069 | FALSE | Photoreceptor          |
| GGGTGAA db/m1 | db/m | 533  | 0.049679 | FALSE | 3.093654 | FALSE | Muller cell            |
| GGGTGAA db/m1 | db/m | 1754 | 0.05065  | FALSE | 1.072602 | FALSE | Photoreceptor          |
| GGGTGAA db/m1 | db/m | 954  | 0.032546 | FALSE | 0.922984 | FALSE | Photoreceptor          |
| GGGTGTC db/m1 | db/m | 773  | 0.098234 | FALSE | 0.726666 | FALSE | Photoreceptor          |
| GGGTGTC db/m1 | db/m | 544  | 0.209157 | TRUE  | 19.27835 | TRUE  |                        |
| GGGTGTC db/m1 | db/m | 5652 | 0.014997 | FALSE | 0.975071 | FALSE | Photoreceptor          |
| GGGTGTC db/m1 | db/m | 3267 | 0.064568 | FALSE | 1.145178 | FALSE | Endothelia Venous EC   |
| GGGTTAT db/m1 | db/m | 3794 | 0.148319 | TRUE  | 2.960024 | FALSE |                        |
| GGGTTAT db/m1 | db/m | 4546 | 0.038953 | FALSE | 1.116488 | FALSE | Photoreceptor          |
| GGGTTAT db/m1 | db/m | 6337 | 0.012303 | FALSE | 0.992738 | FALSE | Photoreceptor          |
| GGGTTAT db/m1 | db/m | 5923 | 0.020536 | FALSE | 0.927341 | FALSE | Photoreceptor          |
| GGGTTAT db/m1 | db/m | 1327 | 0.084562 | FALSE | 0.476793 | FALSE | Photoreceptor          |
| GGGTTAT db/m1 | db/m | 3870 | 0.024971 | FALSE | 1.041728 | FALSE | Endothelia Capillary E |
| GGGTTAT db/m1 | db/m | 459  | 0.021286 | FALSE | 2.406907 | FALSE | Photoreceptor          |
| GGGTTAT db/m1 | db/m | 8305 | 0.013074 | FALSE | 0.735164 | FALSE | Photoreceptor          |
| GGGTTAT db/m1 | db/m | 789  | 0.054795 | FALSE | 0.886678 | FALSE | Photoreceptor          |
| GGGTTAT db/m1 | db/m | 4771 | 0.031973 | FALSE | 1.011199 | FALSE | Photoreceptor          |
| GGGTTAT db/m1 | db/m | 1673 | 0.048732 | FALSE | 7.021063 | TRUE  |                        |
| GGGTTA db/m1  | db/m | 751  | 0.046906 | FALSE | 4.175239 | FALSE | Muller cell            |
| GGGTTA db/m1  | db/m | 3229 | 0.036891 | FALSE | 1.233136 | FALSE | Endothelia Capillary E |
| GGGTTA db/m1  | db/m | 1012 | 0.024971 | FALSE | 1.47354  | FALSE | Photoreceptor          |

|                |      |      |          |       |          |       |                        |
|----------------|------|------|----------|-------|----------|-------|------------------------|
| GGGTTTAC db/m1 | db/m | 7284 | 0.008234 | FALSE | 0.891797 | FALSE | Photoreceptor          |
| GGGTTTA db/m1  | db/m | 533  | 0.023682 | FALSE | 1.03747  | FALSE | Photoreceptor          |
| GGTAACT db/m1  | db/m | 1012 | 0.046025 | FALSE | 2.136407 | FALSE | Neuron                 |
| GGTAACT db/m1  | db/m | 2141 | 0.093319 | FALSE | 18.27593 | TRUE  |                        |
| GGTAACT db/m1  | db/m | 1494 | 0.060641 | FALSE | 9.322034 | TRUE  |                        |
| GGTAACT db/m1  | db/m | 3938 | 0.053718 | FALSE | 1.294139 | FALSE | Photoreceptor          |
| GGTAACT db/m1  | db/m | 4714 | 0.025416 | FALSE | 0.778943 | FALSE | Photoreceptor          |
| GGTAACT db/m1  | db/m | 3278 | 0.016181 | FALSE | 1.120198 | FALSE | Endothelia Venous EC   |
| GGTAATC db/m1  | db/m | 2163 | 0.059406 | FALSE | 0.963284 | FALSE | Photoreceptor          |
| GGTAATC db/m1  | db/m | 3911 | 0.063221 | FALSE | 1.352417 | FALSE | Photoreceptor          |
| GGTAATC db/m1  | db/m | 2727 | 0.038251 | FALSE | 0.988957 | FALSE | Photoreceptor          |
| GGTAATC db/m1  | db/m | 4417 | 0.13452  | TRUE  | 2.40561  | FALSE |                        |
| GGTAATC db/m1  | db/m | 1387 | 0.046906 | FALSE | 1.571713 | FALSE | Photoreceptor          |
| GGTAATC db/m1  | db/m | 650  | 0.024105 | FALSE | 3.152691 | FALSE | Photoreceptor          |
| GGTAGAG db/m1  | db/m | 1787 | 0.106408 | TRUE  | 5.136044 | TRUE  |                        |
| GGTAGAG db/m1  | db/m | 2808 | 0.035586 | FALSE | 1.296013 | FALSE | Photoreceptor          |
| GGTAGAG db/m1  | db/m | 573  | 0.007833 | FALSE | 2.008873 | FALSE | Endothelia Capillary E |
| GGTAGAG db/m1  | db/m | 5049 | 0.061912 | FALSE | 0.822165 | FALSE | Photoreceptor          |
| GGTAGAG db/m1  | db/m | 1753 | 0.014429 | FALSE | 0.613802 | FALSE | Microglia              |
| GGTAGAG db/m1  | db/m | 2499 | 0.005607 | FALSE | 0.983125 | FALSE | Neuron                 |
| GGTAGAG db/m1  | db/m | 682  | 0.014997 | FALSE | 1.147208 | FALSE | Endothelia Capillary E |
| GGTAGAG db/m1  | db/m | 495  | 0.08663  | FALSE | 20.07255 | TRUE  |                        |
| GGTAGAG db/m1  | db/m | 582  | 0.012814 | FALSE | 2.220606 | FALSE | Endothelia Capillary E |
| GGTAGAG db/m1  | db/m | 3650 | 0.010846 | FALSE | 1.20527  | FALSE | Photoreceptor          |
| GGTAGAG db/m1  | db/m | 574  | 0.022059 | FALSE | 2.56764  | FALSE | Endothelia Capillary E |
| GGTCACG db/m1  | db/m | 2213 | 0.022857 | FALSE | 1.904428 | FALSE | Neuron                 |
| GGTCACG db/m1  | db/m | 2856 | 0.029266 | FALSE | 1.125316 | FALSE | Endothelia Venous EC   |
| GGTCACG db/m1  | db/m | 1282 | 0.020171 | FALSE | 0.657187 | FALSE | Photoreceptor          |
| GGTCACG db/m1  | db/m | 785  | 0.029787 | FALSE | 2.460682 | FALSE | Photoreceptor          |
| GGTCTGG db/m1  | db/m | 720  | 0.019455 | FALSE | 2.110856 | FALSE | Photoreceptor          |
| GGTCTGG db/m1  | db/m | 4255 | 0.015287 | FALSE | 0.834787 | FALSE | Photoreceptor          |
| GGTCTGG db/m1  | db/m | 1116 | 0.037564 | FALSE | 1.85183  | FALSE | Photoreceptor          |
| GGTCTGG db/m1  | db/m | 7910 | 0.029266 | FALSE | 0.831968 | FALSE | Photoreceptor          |
| GGTCTGG db/m1  | db/m | 4254 | 0.037564 | FALSE | 0.962369 | FALSE | Endothelia Venous EC   |
| GGTCTGG db/m1  | db/m | 4770 | 0.013338 | FALSE | 1.164124 | FALSE | Photoreceptor          |
| GGTCTGG db/m1  | db/m | 1136 | 0.040404 | FALSE | 1.691578 | FALSE | Photoreceptor          |
| GGTGAAG db/m1  | db/m | 1536 | 0.059406 | FALSE | 1.259154 | FALSE | Photoreceptor          |
| GGTGAAG db/m1  | db/m | 885  | 0.088776 | FALSE | 2.354635 | FALSE | Endothelia Capillary E |
| GGTGAAG db/m1  | db/m | 1913 | 0.055901 | FALSE | 0.997746 | FALSE | Photoreceptor          |
| GGTGAAG db/m1  | db/m | 1289 | 0.059406 | FALSE | 1.666399 | FALSE | Photoreceptor          |
| GGTGAAG db/m1  | db/m | 3637 | 0.010846 | FALSE | 1.271844 | FALSE | Photoreceptor          |
| GGTGAAG db/m1  | db/m | 9191 | 0.017114 | FALSE | 0.844137 | FALSE | Photoreceptor          |
| GGTGAAG db/m1  | db/m | 7957 | 0.034334 | FALSE | 0.772284 | FALSE | Photoreceptor          |
| GGTGAAG db/m1  | db/m | 1859 | 0.014711 | FALSE | 1.247997 | FALSE | Endothelia Capillary E |
| GGTGAAG db/m1  | db/m | 645  | 0.037564 | FALSE | 63.79443 | TRUE  |                        |
| GGTGATT db/m1  | db/m | 1344 | 0.010846 | FALSE | 1.54333  | FALSE | Endothelia Capillary E |
| GGTGATT db/m1  | db/m | 2308 | 0.035586 | FALSE | 0.637979 | FALSE | Photoreceptor          |

|                |      |      |          |       |          |       |                        |
|----------------|------|------|----------|-------|----------|-------|------------------------|
| GGTGATT/db/m1  | db/m | 3862 | 0.047807 | FALSE | 1.159279 | FALSE | Endothelia Venous EC   |
| GGTGATT/db/m1  | db/m | 448  | 0.053718 | FALSE | 4.168537 | FALSE | Muller cell            |
| GGTGATT/db/m1  | db/m | 2442 | 0.063221 | FALSE | 1.596867 | FALSE | Photoreceptor          |
| GGTGGCT/db/m1  | db/m | 6032 | 0.020171 | FALSE | 0.764717 | FALSE | Photoreceptor          |
| GGTGGCT/db/m1  | db/m | 1315 | 0.021286 | FALSE | 1.539097 | FALSE | Endothelia Capillary E |
| GGTGGCT/db/m1  | db/m | 2873 | 0.020908 | FALSE | 0.751617 | FALSE | Photoreceptor          |
| GGTGGCT/db/m1  | db/m | 1072 | 0.044326 | FALSE | 1.164156 | FALSE | Photoreceptor          |
| GGTGTCG/db/m1  | db/m | 3696 | 0.065957 | FALSE | 1.594078 | FALSE | Photoreceptor          |
| GGTGTCG/db/m1  | db/m | 2943 | 0.011805 | FALSE | 1.176511 | FALSE | Endothelia Aterial EC  |
| GGTGTCG/db/m1  | db/m | 3397 | 0.025416 | FALSE | 1.034083 | FALSE | Endothelia Capillary E |
| GGTGTCG/db/m1  | db/m | 401  | 0.334395 | TRUE  | 20.44025 | TRUE  |                        |
| GGTGTCG/db/m1  | db/m | 3868 | 0.095727 | FALSE | 0.965099 | FALSE | Photoreceptor          |
| GGTGTTA/db/m1  | db/m | 5727 | 0.023266 | FALSE | 1.128493 | FALSE | Photoreceptor          |
| GGTGTTA/db/m1  | db/m | 6682 | 0.023266 | FALSE | 0.737658 | FALSE | Photoreceptor          |
| GGTGTTA/db/m1  | db/m | 211  | 0.057037 | FALSE | 5.399792 | TRUE  |                        |
| GGTGTTA/db/m1  | db/m | 1998 | 0.064568 | FALSE | 1.305423 | FALSE | Photoreceptor          |
| GGTGTTA/db/m1  | db/m | 6046 | 0.014711 | FALSE | 1.099256 | FALSE | Photoreceptor          |
| GGTGTTA/db/m1  | db/m | 654  | 0.045165 | FALSE | 4.008386 | FALSE | Endothelia Aterial EC  |
| GGTGTTA/db/m1  | db/m | 8627 | 0.064568 | FALSE | 0.68971  | FALSE | Photoreceptor          |
| GGTGTTA/db/m1  | db/m | 1005 | 0.03313  | FALSE | 0.820865 | FALSE | Photoreceptor          |
| GGTGTTA/db/m1  | db/m | 1001 | 0.021286 | FALSE | 1.390252 | FALSE | Photoreceptor          |
| GGTGTTA/db/m1  | db/m | 630  | 0.068864 | FALSE | 2.551674 | FALSE | Neuron                 |
| GGTGTTA/db/m1  | db/m | 3469 | 0.017758 | FALSE | 1.411244 | FALSE | Endothelia Capillary E |
| GGTGTTA/db/m1  | db/m | 2533 | 0.044326 | FALSE | 1.102661 | FALSE | Photoreceptor          |
| GGTTAAC/db/m1  | db/m | 495  | 0.036891 | FALSE | 68.16791 | TRUE  |                        |
| GGTTAAC/db/m1  | db/m | 1797 | 0.024971 | FALSE | 0.861427 | FALSE | Photoreceptor          |
| GGTTAAC/db/m1  | db/m | 7464 | 0.071958 | FALSE | 0.8367   | FALSE | Photoreceptor          |
| GGTTAACT/db/m1 | db/m | 920  | 0.029787 | FALSE | 1.026743 | FALSE | Photoreceptor          |
| GGTTAACT/db/m1 | db/m | 433  | 0.068864 | FALSE | 3.163216 | FALSE | Muller cell            |
| GGTTCTCC/db/m1 | db/m | 2158 | 0.040404 | FALSE | 1.824793 | FALSE | Photoreceptor          |
| GGTTCTCT/db/m1 | db/m | 3247 | 0.030859 | FALSE | 1.135548 | FALSE | Endothelia Venous EC   |
| GGTTGTA/db/m1  | db/m | 1441 | 0.023266 | FALSE | 1.453326 | FALSE | Endothelia Capillary E |
| GGTTGTAC/db/m1 | db/m | 5000 | 0.030859 | FALSE | 1.131495 | FALSE | Photoreceptor          |
| GGTTGTAC/db/m1 | db/m | 736  | 0.192271 | TRUE  | 13.36478 | TRUE  |                        |
| GGTTGTA/db/m1  | db/m | 2875 | 0.012557 | FALSE | 1.123213 | FALSE | Endothelia Venous EC   |
| GGTTGTA/db/m1  | db/m | 738  | 0.093319 | FALSE | 2.429002 | FALSE | Photoreceptor          |
| GTAACAC/db/m1  | db/m | 494  | 0.067388 | FALSE | 13.81216 | TRUE  |                        |
| GTAACAC/db/m1  | db/m | 493  | 0.025416 | FALSE | 57.52158 | TRUE  |                        |
| GTAACACC/db/m1 | db/m | 1273 | 0.032546 | FALSE | 1.113855 | FALSE | Photoreceptor          |
| GTAACACC/db/m1 | db/m | 1909 | 0.018761 | FALSE | 1.739714 | FALSE | Endothelia Aterial EC  |
| GTAACACT/db/m1 | db/m | 474  | 0.011805 | FALSE | 1.432823 | FALSE | Endothelia Capillary E |
| GTAACACT/db/m1 | db/m | 1994 | 0.038251 | FALSE | 1.35223  | FALSE | Photoreceptor          |
| GTAACACT/db/m1 | db/m | 1664 | 0.029787 | FALSE | 1.769581 | FALSE | Pericyte               |
| GTAACACT/db/m1 | db/m | 6043 | 0.036891 | FALSE | 1.015516 | FALSE | Photoreceptor          |
| GTAACCA/db/m1  | db/m | 3188 | 0.17103  | TRUE  | 9.113996 | TRUE  |                        |
| GTAACCA/db/m1  | db/m | 1907 | 0.031973 | FALSE | 1.126384 | FALSE | Endothelia Capillary E |
| GTAACCA/db/m1  | db/m | 1747 | 0.017434 | FALSE | 1.609864 | FALSE | Endothelia Capillary E |

|         |       |      |      |          |       |          |       |                        |
|---------|-------|------|------|----------|-------|----------|-------|------------------------|
| GTAACCA | db/m1 | db/m | 2963 | 0.022857 | FALSE | 1.252965 | FALSE | Endothelia Venous EC   |
| GTAACCA | db/m1 | db/m | 4941 | 0.020908 | FALSE | 1.046235 | FALSE | Endothelia Venous EC   |
| GTAACCA | db/m1 | db/m | 969  | 0.019455 | FALSE | 3.554454 | FALSE | Muller cell            |
| GTAACCA | db/m1 | db/m | 3942 | 0.011081 | FALSE | 0.443796 | FALSE | Photoreceptor          |
| GTAAGTC | db/m1 | db/m | 4817 | 0.014711 | FALSE | 1.000167 | FALSE | Photoreceptor          |
| GTAAGTC | db/m1 | db/m | 427  | 0.041154 | FALSE | 1.598974 | FALSE | Photoreceptor          |
| GTAAGTC | db/m1 | db/m | 610  | 0.109375 | TRUE  | 9.280743 | TRUE  |                        |
| GTAAGTC | db/m1 | db/m | 470  | 0.130259 | TRUE  | 3.059581 | FALSE |                        |
| GTAAGTC | db/m1 | db/m | 3437 | 0.037564 | FALSE | 1.044742 | FALSE | Photoreceptor          |
| GTAAGTC | db/m1 | db/m | 514  | 0.031973 | FALSE | 0.973588 | FALSE | Photoreceptor          |
| GTAAGTC | db/m1 | db/m | 3675 | 0.021669 | FALSE | 1.342707 | FALSE | Photoreceptor          |
| GTAAGTC | db/m1 | db/m | 6044 | 0.012303 | FALSE | 1.028825 | FALSE | Photoreceptor          |
| GTAATCG | db/m1 | db/m | 368  | 0.025416 | FALSE | 62.53709 | TRUE  |                        |
| GTAATCG | db/m1 | db/m | 1334 | 0.046025 | FALSE | 0.846355 | FALSE | Photoreceptor          |
| GTAATCG | db/m1 | db/m | 6267 | 0.013338 | FALSE | 1.066971 | FALSE | Photoreceptor          |
| GTAATCG | db/m1 | db/m | 885  | 0.05065  | FALSE | 2.781934 | FALSE | Muller cell            |
| GTAATGC | db/m1 | db/m | 3008 | 0.022857 | FALSE | 1.210138 | FALSE | Photoreceptor          |
| GTAATGC | db/m1 | db/m | 1171 | 0.054795 | FALSE | 1.57353  | FALSE | Photoreceptor          |
| GTAATGC | db/m1 | db/m | 499  | 0.024534 | FALSE | 2.604079 | FALSE | Photoreceptor          |
| GTAATGC | db/m1 | db/m | 5903 | 0.030318 | FALSE | 1.090159 | FALSE | Photoreceptor          |
| GTAATGC | db/m1 | db/m | 8019 | 0.018761 | FALSE | 0.837688 | FALSE | Photoreceptor          |
| GTAATGC | db/m1 | db/m | 2401 | 0.065957 | FALSE | 1.708698 | FALSE | Photoreceptor          |
| GTAATGC | db/m1 | db/m | 3504 | 0.041154 | FALSE | 0.89128  | FALSE | Photoreceptor          |
| GTAATGC | db/m1 | db/m | 4394 | 0.067388 | FALSE | 1.070494 | FALSE | Photoreceptor          |
| GTACAAC | db/m1 | db/m | 3029 | 0.031973 | FALSE | 1.380496 | FALSE | Photoreceptor          |
| GTACAAC | db/m1 | db/m | 960  | 0.052669 | FALSE | 6.180555 | TRUE  |                        |
| GTACAAC | db/m1 | db/m | 2214 | 0.068864 | FALSE | 1.374814 | FALSE | Photoreceptor          |
| GTACAAC | db/m1 | db/m | 2563 | 0.036891 | FALSE | 0.613898 | FALSE | Photoreceptor          |
| GTACAAC | db/m1 | db/m | 2278 | 0.019455 | FALSE | 0.626539 | FALSE | Photoreceptor          |
| GTACAGT | db/m1 | db/m | 591  | 0.023682 | FALSE | 65.55514 | TRUE  |                        |
| GTACAGT | db/m1 | db/m | 378  | 0.017434 | FALSE | 2.994892 | FALSE | Photoreceptor          |
| GTACAGT | db/m1 | db/m | 3117 | 0.04192  | FALSE | 1.46088  | FALSE | Endothelia Venous EC   |
| GTAGAAA | db/m1 | db/m | 4002 | 0.016488 | FALSE | 1.120794 | FALSE | Endothelia Venous EC   |
| GTAGAAA | db/m1 | db/m | 2223 | 0.067388 | FALSE | 1.992181 | FALSE | Muller cell            |
| GTAGAAA | db/m1 | db/m | 586  | 0.063221 | FALSE | 18.5065  | TRUE  |                        |
| GTAGAAA | db/m1 | db/m | 1828 | 0.027273 | FALSE | 1.528266 | FALSE | Photoreceptor          |
| GTAGAAA | db/m1 | db/m | 2243 | 0.052669 | FALSE | 1.746246 | FALSE | Muller cell            |
| GTAGAAA | db/m1 | db/m | 1972 | 0.016799 | FALSE | 1.255152 | FALSE | Endothelia Capillary E |
| GTAGAAA | db/m1 | db/m | 4352 | 0.034334 | FALSE | 1.051798 | FALSE | Photoreceptor          |
| GTAGAAA | db/m1 | db/m | 5174 | 0.022059 | FALSE | 1.049441 | FALSE | Photoreceptor          |
| GTAGAGG | db/m1 | db/m | 5515 | 0.24     | TRUE  | 5.559603 | TRUE  |                        |
| GTAGAGG | db/m1 | db/m | 2354 | 0.071958 | FALSE | 1.569073 | FALSE | Endothelia Capillary E |
| GTAGAGG | db/m1 | db/m | 2956 | 0.008032 | FALSE | 1.853189 | FALSE | Photoreceptor          |
| GTAGAGG | db/m1 | db/m | 3493 | 0.024105 | FALSE | 1.290295 | FALSE | Endothelia Venous EC   |
| GTAGAGG | db/m1 | db/m | 1073 | 0.011561 | FALSE | 1.751006 | FALSE | Endothelia Capillary E |
| GTAGAGG | db/m1 | db/m | 1892 | 0.015879 | FALSE | 1.296691 | FALSE | Endothelia Capillary E |
| GTAGAGG | db/m1 | db/m | 1881 | 0.012303 | FALSE | 1.253613 | FALSE | Endothelia Venous EC   |



|                 |      |      |          |       |          |       |                        |
|-----------------|------|------|----------|-------|----------|-------|------------------------|
| GTAGAGG db/m1   | db/m | 3094 | 0.046025 | FALSE | 1.850959 | FALSE | Photoreceptor          |
| GTAGATC db/m1   | db/m | 3184 | 0.150727 | TRUE  | 3.005408 | FALSE |                        |
| GTAGATCC db/m1  | db/m | 394  | 0.049679 | FALSE | 1.863267 | FALSE | Photoreceptor          |
| GTAGATCC db/m1  | db/m | 1606 | 0.042704 | FALSE | 1.139734 | FALSE | Photoreceptor          |
| GTAGATCC db/m1  | db/m | 701  | 0.080645 | FALSE | 0.606202 | FALSE | Photoreceptor          |
| GTAGATCC db/m1  | db/m | 5895 | 0.027273 | FALSE | 0.819273 | FALSE | Photoreceptor          |
| GTAGATCT db/m1  | db/m | 1278 | 0.052669 | FALSE | 2.579996 | FALSE | Muller cell            |
| GTAGCTA db/m1   | db/m | 1849 | 0.014151 | FALSE | 1.131612 | FALSE | Endothelia Capillary E |
| GTAGCTAC db/m1  | db/m | 5293 | 0.027758 | FALSE | 1.156272 | FALSE | Photoreceptor          |
| GTAGCTAC db/m1  | db/m | 2499 | 0.078788 | FALSE | 1.251964 | FALSE | Photoreceptor          |
| GTAGCTAC db/m1  | db/m | 1889 | 0.057037 | FALSE | 1.20277  | FALSE | Endothelia Capillary E |
| GTAGCTAC db/m1  | db/m | 4017 | 0.058205 | FALSE | 0.974397 | FALSE | Photoreceptor          |
| GTAGCTAT db/m1  | db/m | 2352 | 0.059406 | FALSE | 7.129095 | TRUE  |                        |
| GTAGCTAT db/m1  | db/m | 2541 | 0.046025 | FALSE | 2.310466 | FALSE | Neuron                 |
| GTAGGAG db/m1   | db/m | 868  | 0.073582 | FALSE | 24.89796 | TRUE  |                        |
| GTAGGAG db/m1   | db/m | 578  | 0.041154 | FALSE | 2.861142 | FALSE | Neuron                 |
| GTAGGAG db/m1   | db/m | 1301 | 0.017434 | FALSE | 1.337464 | FALSE | Photoreceptor          |
| GTAGGAG db/m1   | db/m | 1998 | 0.011561 | FALSE | 1.378047 | FALSE | Pericyte               |
| GTAGGAG db/m1   | db/m | 1146 | 0.115723 | TRUE  | 24.29224 | TRUE  |                        |
| GTAGGAG db/m1   | db/m | 840  | 0.008644 | FALSE | 1.110347 | FALSE | Endothelia Capillary E |
| GTAGGAG db/m1   | db/m | 1918 | 0.019106 | FALSE | 1.563723 | FALSE | Endothelia Capillary E |
| GTAGGAG db/m1   | db/m | 7146 | 0.030859 | FALSE | 0.910598 | FALSE | Photoreceptor          |
| GTAGGTT db/m1   | db/m | 6332 | 0.063221 | FALSE | 1.176519 | FALSE | Photoreceptor          |
| GTAGGTT db/m1   | db/m | 1963 | 0.015287 | FALSE | 3.074176 | FALSE | Muller cell            |
| GTAGGTT db/m1   | db/m | 4525 | 0.040404 | FALSE | 1.357489 | FALSE | Photoreceptor          |
| GTAGGTT db/m1   | db/m | 819  | 0.048732 | FALSE | 2.266802 | FALSE | Endothelia Capillary E |
| GTAGGTT db/m1   | db/m | 1777 | 0.039671 | FALSE | 1.697411 | FALSE | Pericyte               |
| GTAGGTT db/m1   | db/m | 1357 | 0.038953 | FALSE | 1.783956 | FALSE | Photoreceptor          |
| GTAGGTT db/m1   | db/m | 8007 | 0.014711 | FALSE | 0.749456 | FALSE | Photoreceptor          |
| GTAGTAC db/m1   | db/m | 4797 | 0.029266 | FALSE | 1.304381 | FALSE | Photoreceptor          |
| GTAGTAC db/m1   | db/m | 2624 | 0.003649 | FALSE | 1.082772 | FALSE | Neuron                 |
| GTAGTACC db/m1  | db/m | 889  | 0.070386 | FALSE | 10.53435 | TRUE  |                        |
| GTAGTACC db/m1  | db/m | 630  | 0.022455 | FALSE | 1.762136 | FALSE | Photoreceptor          |
| GTAGTACC db/m1  | db/m | 3420 | 0.014151 | FALSE | 1.124222 | FALSE | Endothelia Venous EC   |
| GTAGTACC db/m1  | db/m | 986  | 0.029266 | FALSE | 4.903459 | FALSE | Muller cell            |
| GTATTGGC db/m1  | db/m | 6373 | 0.01981  | FALSE | 0.913186 | FALSE | Photoreceptor          |
| GTATTGGC db/m1  | db/m | 4722 | 0.048732 | FALSE | 1.087727 | FALSE | Endothelia Venous EC   |
| GTATTGGC db/m1  | db/m | 924  | 0.070386 | FALSE | 10.76294 | TRUE  |                        |
| GTATTGGT db/m1  | db/m | 3640 | 0.082569 | FALSE | 1.523429 | FALSE | Neuron                 |
| GTATTTCA db/m1  | db/m | 496  | 0.088776 | FALSE | 2.906261 | FALSE | Endothelia Capillary E |
| GTATTTTCG db/m1 | db/m | 1499 | 0.016181 | FALSE | 1.373109 | FALSE | Endothelia Capillary E |
| GTATTTCT db/m1  | db/m | 896  | 0.029266 | FALSE | 3.015869 | FALSE | Endothelia Capillary E |
| GTATTTCT db/m1  | db/m | 4722 | 0.030859 | FALSE | 1.050284 | FALSE | Endothelia Venous EC   |
| GTATTTCT db/m1  | db/m | 5200 | 0.014151 | FALSE | 0.922352 | FALSE | Endothelia Venous EC   |
| GTCAAAC db/m1   | db/m | 1169 | 0.021286 | FALSE | 1.885583 | FALSE | Endothelia Capillary E |
| GTCAAAC db/m1   | db/m | 7238 | 0.064568 | FALSE | 0.863878 | FALSE | Photoreceptor          |
| GTCAAAC db/m1   | db/m | 727  | 0.122691 | TRUE  | 23.91304 | TRUE  |                        |

|                |      |      |          |       |          |       |                         |
|----------------|------|------|----------|-------|----------|-------|-------------------------|
| GTCAAACC db/m1 | db/m | 4991 | 0.034334 | FALSE | 0.885384 | FALSE | Photoreceptor           |
| GTCAAACC db/m1 | db/m | 2249 | 0.007441 | FALSE | 1.066373 | FALSE | Endothelia Capillary EC |
| GTCAAACC db/m1 | db/m | 997  | 0.021286 | FALSE | 1.198059 | FALSE | Photoreceptor           |
| GTCAAACC db/m1 | db/m | 5215 | 0.032546 | FALSE | 1.138365 | FALSE | Photoreceptor           |
| GTCAAACC db/m1 | db/m | 2994 | 0.024534 | FALSE | 1.192784 | FALSE | Endothelia Capillary EC |
| GTCAAACC db/m1 | db/m | 512  | 0.078788 | FALSE | 20.2439  | TRUE  |                         |
| GTCAAACC db/m1 | db/m | 6426 | 0.018761 | FALSE | 1.059745 | FALSE | Photoreceptor           |
| GTCAAAC db/m1  | db/m | 719  | 0.05065  | FALSE | 1.36899  | FALSE | Photoreceptor           |
| GTCAAAC db/m1  | db/m | 6799 | 0.135645 | TRUE  | 1.101647 | FALSE |                         |
| GTCAAGT db/m1  | db/m | 2449 | 0.048732 | FALSE | 2.046778 | FALSE | Photoreceptor           |
| GTCAAGT db/m1  | db/m | 398  | 0.082569 | FALSE | 3.942692 | FALSE | Muller cell             |
| GTCAAGT db/m1  | db/m | 465  | 0.015879 | FALSE | 2.70822  | FALSE | Pericyte                |
| GTCAAGT db/m1  | db/m | 6983 | 0.013876 | FALSE | 0.878917 | FALSE | Photoreceptor           |
| GTCAAGT db/m1  | db/m | 631  | 0.010157 | FALSE | 3.986795 | FALSE | Photoreceptor           |
| GTCAAGT db/m1  | db/m | 527  | 0.033726 | FALSE | 1.812669 | FALSE | Photoreceptor           |
| GTCACGG db/m1  | db/m | 4142 | 0.025868 | FALSE | 1.108067 | FALSE | Photoreceptor           |
| GTCACGG db/m1  | db/m | 4688 | 0.130374 | TRUE  | 2.485759 | FALSE |                         |
| GTCACGG db/m1  | db/m | 1226 | 0.05065  | FALSE | 1.213749 | FALSE | Photoreceptor           |
| GTCACGG db/m1  | db/m | 1475 | 0.013876 | FALSE | 1.468138 | FALSE | Endothelia Capillary EC |
| GTCACGG db/m1  | db/m | 2695 | 0.036232 | FALSE | 1.002044 | FALSE | Photoreceptor           |
| GTCACGG db/m1  | db/m | 4686 | 0.032546 | FALSE | 0.490333 | FALSE | Photoreceptor           |
| GTCACGG db/m1  | db/m | 1736 | 0.051646 | FALSE | 1.639239 | FALSE | Endothelia Capillary EC |
| GTCACGG db/m1  | db/m | 3220 | 0.076994 | FALSE | 1.319876 | FALSE | Pericyte                |
| GTCACGG db/m1  | db/m | 1551 | 0.05065  | FALSE | 0.721047 | FALSE | Photoreceptor           |
| GTCACGG db/m1  | db/m | 2465 | 0.159016 | TRUE  | 4.171855 | FALSE |                         |
| GTCACGG db/m1  | db/m | 595  | 0.059406 | FALSE | 6.314581 | TRUE  |                         |
| GTCACTCA db/m1 | db/m | 1149 | 0.043505 | FALSE | 2.031697 | FALSE | Endothelia Capillary EC |
| GTCACTCA db/m1 | db/m | 3882 | 0.030318 | FALSE | 1.091247 | FALSE | Endothelia Venous EC    |
| GTCACTCC db/m1 | db/m | 1200 | 0.058205 | FALSE | 0.636324 | FALSE | Photoreceptor           |
| GTCACTCC db/m1 | db/m | 3154 | 0.015879 | FALSE | 0.577987 | FALSE | Photoreceptor           |
| GTCACTCC db/m1 | db/m | 915  | 0.078788 | FALSE | 1.459727 | FALSE | Photoreceptor           |
| GTCACTCC db/m1 | db/m | 527  | 0.095727 | FALSE | 18.98048 | TRUE  |                         |
| GTCACTCC db/m1 | db/m | 1171 | 0.093319 | FALSE | 2.50461  | FALSE | Photoreceptor           |
| GTCACTCC db/m1 | db/m | 601  | 0.009063 | FALSE | 0.792531 | FALSE | Photoreceptor           |
| GTCACTCC db/m1 | db/m | 5157 | 0.034334 | FALSE | 1.00952  | FALSE | Photoreceptor           |
| GTCACTCC db/m1 | db/m | 193  | 0.110901 | TRUE  | 1.274623 | FALSE |                         |
| GTCACTCC db/m1 | db/m | 5206 | 0.028251 | FALSE | 1.034022 | FALSE | Photoreceptor           |
| GTCACTCC db/m1 | db/m | 3116 | 0.009493 | FALSE | 1.299588 | FALSE | Endothelia Venous EC    |
| GTCACTCC db/m1 | db/m | 447  | 0.052669 | FALSE | 12.38806 | TRUE  |                         |
| GTCACTCT db/m1 | db/m | 585  | 0.098234 | FALSE | 1.465633 | FALSE | Photoreceptor           |
| GTCAGCG db/m1  | db/m | 706  | 0.034954 | FALSE | 2.944701 | FALSE | Photoreceptor           |
| GTCAGCG db/m1  | db/m | 797  | 0.009063 | FALSE | 2.603005 | FALSE | Endothelia Capillary EC |
| GTCAGCG db/m1  | db/m | 3041 | 0.030318 | FALSE | 1.347249 | FALSE | Endothelia Capillary EC |
| GTCATCCA db/m1 | db/m | 7876 | 0.013605 | FALSE | 0.777052 | FALSE | Photoreceptor           |
| GTCATCCA db/m1 | db/m | 3570 | 0.053718 | FALSE | 1.125742 | FALSE | Photoreceptor           |
| GTCATCCA db/m1 | db/m | 5328 | 0.034334 | FALSE | 0.941312 | FALSE | Photoreceptor           |
| GTCATCCC db/m1 | db/m | 919  | 0.075259 | FALSE | 9.739454 | TRUE  |                         |

|                 |      |      |          |       |          |       |                        |
|-----------------|------|------|----------|-------|----------|-------|------------------------|
| GTCATCCC db/m1  | db/m | 5682 | 0.028754 | FALSE | 1.172307 | FALSE | Photoreceptor          |
| GTCATCCC db/m1  | db/m | 442  | 0.014429 | FALSE | 3.207256 | FALSE | Photoreceptor          |
| GTCATCCC db/m1  | db/m | 478  | 0.046906 | FALSE | 1.918468 | FALSE | Photoreceptor          |
| GTCATCCT db/m1  | db/m | 443  | 0.064568 | FALSE | 4.788535 | FALSE | Muller cell            |
| GTCATCCT db/m1  | db/m | 1643 | 0.045165 | FALSE | 1.662773 | FALSE | Photoreceptor          |
| GTCATCCT db/m1  | db/m | 7857 | 0.034334 | FALSE | 0.780762 | FALSE | Photoreceptor          |
| GTCATGA db/m1   | db/m | 377  | 0.078788 | FALSE | 2.836824 | FALSE | Photoreceptor          |
| GTCATGA db/m1   | db/m | 5276 | 0.010846 | FALSE | 1.022172 | FALSE | Photoreceptor          |
| GTCATGAC db/m1  | db/m | 3961 | 0.084562 | FALSE | 5.558847 | TRUE  |                        |
| GTCATGAC db/m1  | db/m | 990  | 0.039671 | FALSE | 1.13927  | FALSE | Photoreceptor          |
| GTCATGAT db/m1  | db/m | 899  | 0.046906 | FALSE | 0.963831 | FALSE | Photoreceptor          |
| GTCATGAT db/m1  | db/m | 564  | 0.088776 | FALSE | 4.294333 | FALSE | Muller cell            |
| GTCATTTA db/m1  | db/m | 1238 | 0.252153 | TRUE  | 17.75781 | TRUE  |                        |
| GTCATTTA db/m1  | db/m | 5304 | 0.018088 | FALSE | 1.087223 | FALSE | Photoreceptor          |
| GTCATTTTC db/m1 | db/m | 1702 | 0.025868 | FALSE | 1.674714 | FALSE | Endothelia Capillary E |
| GTCATTTTC db/m1 | db/m | 1252 | 0.024971 | FALSE | 1.710097 | FALSE | Photoreceptor          |
| GTCATTTTC db/m1 | db/m | 1761 | 0.013605 | FALSE | 1.311495 | FALSE | Endothelia Capillary E |
| GTCATTTTC db/m1 | db/m | 340  | 0.091004 | FALSE | 4.057147 | FALSE | Photoreceptor          |
| GTCATTTTC db/m1 | db/m | 440  | 0.017114 | FALSE | 2.484211 | FALSE | Photoreceptor          |
| GTCATTTG db/m1  | db/m | 6914 | 0.037564 | FALSE | 0.933532 | FALSE | Photoreceptor          |
| GTCATTTG db/m1  | db/m | 501  | 0.030318 | FALSE | 2.146216 | FALSE | Photoreceptor          |
| GTCCACTA db/m1  | db/m | 1931 | 0.005435 | FALSE | 1.354854 | FALSE | Neuron                 |
| GTCCACTA db/m1  | db/m | 1553 | 0.038251 | FALSE | 0.707234 | FALSE | Photoreceptor          |
| GTCCACTC db/m1  | db/m | 906  | 0.01981  | FALSE | 4.456338 | FALSE | Muller cell            |
| GTCCACTC db/m1  | db/m | 368  | 0.055901 | FALSE | 7.272727 | TRUE  |                        |
| GTCCACTC db/m1  | db/m | 6810 | 0.065957 | FALSE | 1.007513 | FALSE | Endothelia Capillary E |
| GTCCACTC db/m1  | db/m | 782  | 0.041154 | FALSE | 2.386847 | FALSE | Endothelia Capillary E |
| GTCCCATC db/m1  | db/m | 3639 | 0.024105 | FALSE | 1.00765  | FALSE | Endothelia Venous EC   |
| GTCCCATC db/m1  | db/m | 1908 | 0.057037 | FALSE | 1.888474 | FALSE | Photoreceptor          |
| GTCCTCAA db/m1  | db/m | 1935 | 0.080645 | FALSE | 1.182889 | FALSE | Endothelia Capillary E |
| GTCCTCAA db/m1  | db/m | 723  | 0.192271 | TRUE  | 20.59065 | TRUE  |                        |
| GTCCTCAA db/m1  | db/m | 2076 | 0.073582 | FALSE | 1.198746 | FALSE | Photoreceptor          |
| GTCCTCAC db/m1  | db/m | 431  | 0.035586 | FALSE | 1.550854 | FALSE | Photoreceptor          |
| GTCCTCAC db/m1  | db/m | 617  | 0.022059 | FALSE | 1.838881 | FALSE | Photoreceptor          |
| GTCCTCAC db/m1  | db/m | 3715 | 0.058205 | FALSE | 1.160898 | FALSE | Photoreceptor          |
| GTCCTCAC db/m1  | db/m | 1325 | 0.029266 | FALSE | 0.851223 | FALSE | Photoreceptor          |
| GTCCTCAC db/m1  | db/m | 1105 | 0.025868 | FALSE | 1.762679 | FALSE | Endothelia Capillary E |
| GTCCTCAC db/m1  | db/m | 4485 | 0.054795 | FALSE | 1.176813 | FALSE | Photoreceptor          |
| GTCCTCAT db/m1  | db/m | 2181 | 0.038953 | FALSE | 0.815041 | FALSE | Microglia              |
| GTCCTCAT db/m1  | db/m | 7657 | 0.143501 | TRUE  | 2.04076  | FALSE |                        |
| GTCCTCAT db/m1  | db/m | 483  | 0.027758 | FALSE | 4.088488 | FALSE | Muller cell            |
| GTCCTCAT db/m1  | db/m | 1347 | 0.036232 | FALSE | 1.198576 | FALSE | Photoreceptor          |
| GTCGAAT db/m1   | db/m | 594  | 0.051646 | FALSE | 4.093153 | FALSE | Muller cell            |
| GTCGAAT db/m1   | db/m | 1327 | 0.137569 | TRUE  | 4.11033  | FALSE |                        |
| GTCGAATC db/m1  | db/m | 843  | 0.053718 | FALSE | 2.908426 | FALSE | Muller cell            |
| GTCGAATI db/m1  | db/m | 405  | 0.026796 | FALSE | 1.957935 | FALSE | Photoreceptor          |
| GTCGCGA db/m1   | db/m | 490  | 0.057037 | FALSE | 2.392187 | FALSE | Pericyte               |

|                |      |      |          |       |          |       |                        |
|----------------|------|------|----------|-------|----------|-------|------------------------|
| GTCGCGA/ db/m1 | db/m | 1767 | 0.08663  | FALSE | 14.28572 | TRUE  |                        |
| GTCGCGA( db/m1 | db/m | 483  | 0.011081 | FALSE | 1.679806 | FALSE | Endothelia Capillary E |
| GTCGCGA( db/m1 | db/m | 997  | 0.106646 | TRUE  | 1.30165  | FALSE |                        |
| GTCGCGA( db/m1 | db/m | 551  | 0.076994 | FALSE | 4.251216 | FALSE | Microglia              |
| GTCGCGA  db/m1 | db/m | 2790 | 0.034334 | FALSE | 1.385063 | FALSE | Photoreceptor          |
| GTCGCGA  db/m1 | db/m | 6911 | 0.018088 | FALSE | 0.585158 | FALSE | Photoreceptor          |
| GTCGTAA/ db/m1 | db/m | 4819 | 0.020908 | FALSE | 0.736139 | FALSE | Photoreceptor          |
| GTCGTAA/ db/m1 | db/m | 2628 | 0.026796 | FALSE | 1.075647 | FALSE | Photoreceptor          |
| GTCGTAA/ db/m1 | db/m | 5930 | 0.015879 | FALSE | 1.037083 | FALSE | Photoreceptor          |
| GTCGTAA/ db/m1 | db/m | 485  | 0.012814 | FALSE | 1.451081 | FALSE | Muller cell            |
| GTCGTAA( db/m1 | db/m | 873  | 0.228861 | TRUE  | 7.680251 | TRUE  |                        |
| GTCGTAA( db/m1 | db/m | 3767 | 0.080645 | FALSE | 0.932625 | FALSE | Photoreceptor          |
| GTCGTAA( db/m1 | db/m | 5194 | 0.138889 | TRUE  | 2.727385 | FALSE |                        |
| GTCGTAA( db/m1 | db/m | 631  | 0.009277 | FALSE | 2.890926 | FALSE | Endothelia Capillary E |
| GTCGTTCA db/m1 | db/m | 1688 | 0.021669 | FALSE | 1.515023 | FALSE | Endothelia Capillary E |
| GTCGTTCC db/m1 | db/m | 894  | 0.041154 | FALSE | 17.02532 | TRUE  |                        |
| GTCGTTCC db/m1 | db/m | 582  | 0.043505 | FALSE | 1.182393 | FALSE | Muller cell            |
| GTCGTTCC db/m1 | db/m | 4286 | 0.012814 | FALSE | 1.158586 | FALSE | Endothelia Venous EC   |
| GTCGTTCT db/m1 | db/m | 736  | 0.058205 | FALSE | 0.891083 | FALSE | Photoreceptor          |
| GTCGTTCT db/m1 | db/m | 932  | 0.065957 | FALSE | 2.136012 | FALSE | Muller cell            |
| GTCGTTCT db/m1 | db/m | 789  | 0.061912 | FALSE | 1.111473 | FALSE | Photoreceptor          |
| GTCTACCC db/m1 | db/m | 627  | 0.159016 | TRUE  | 12.9683  | TRUE  |                        |
| GTCTACCC db/m1 | db/m | 736  | 0.054795 | FALSE | 2.649341 | FALSE | Endothelia Capillary E |
| GTCTAGA/ db/m1 | db/m | 7496 | 0.008438 | FALSE | 0.862375 | FALSE | Photoreceptor          |
| GTCTAGAC db/m1 | db/m | 2397 | 0.076994 | FALSE | 1.388927 | FALSE | Endothelia Capillary E |
| GTCTAGAC db/m1 | db/m | 1139 | 0.04192  | FALSE | 2.342503 | FALSE | Photoreceptor          |
| GTCTAGAC db/m1 | db/m | 540  | 0.061912 | FALSE | 2.755513 | FALSE | Neuron                 |
| GTCTAGAT db/m1 | db/m | 5800 | 0.015581 | FALSE | 0.861437 | FALSE | Photoreceptor          |
| GTCTCACA db/m1 | db/m | 1377 | 0.084562 | FALSE | 1.674394 | FALSE | Photoreceptor          |
| GTCTCACC db/m1 | db/m | 483  | 0.038953 | FALSE | 4.162664 | FALSE | Muller cell            |
| GTCTCACC db/m1 | db/m | 4832 | 0.029266 | FALSE | 1.236298 | FALSE | Photoreceptor          |
| GTCTCACC db/m1 | db/m | 1441 | 0.010614 | FALSE | 1.378541 | FALSE | Endothelia Aterial EC  |
| GTCTCACT db/m1 | db/m | 1176 | 0.023266 | FALSE | 1.276935 | FALSE | Photoreceptor          |
| GTCTGTCA db/m1 | db/m | 4398 | 0.027758 | FALSE | 0.939901 | FALSE | Photoreceptor          |
| GTCTGTCC db/m1 | db/m | 2324 | 0.054795 | FALSE | 1.200138 | FALSE | Photoreceptor          |
| GTCTGTCC db/m1 | db/m | 610  | 0.032546 | FALSE | 3.399523 | FALSE | Endothelia Capillary E |
| GTCTGTCT db/m1 | db/m | 2108 | 0.012303 | FALSE | 1.516677 | FALSE | Photoreceptor          |
| GTCTTTAA db/m1 | db/m | 2511 | 0.067388 | FALSE | 0.990114 | FALSE | Photoreceptor          |
| GTCTTTAA db/m1 | db/m | 895  | 0.039671 | FALSE | 0.533146 | FALSE | Photoreceptor          |
| GTCTTTAA db/m1 | db/m | 663  | 0.005264 | FALSE | 2.499687 | FALSE | Pericyte               |
| GTCTTTAC db/m1 | db/m | 4499 | 0.045165 | FALSE | 1.213354 | FALSE | Photoreceptor          |
| GTCTTTAG db/m1 | db/m | 1300 | 0.020171 | FALSE | 1.081537 | FALSE | Photoreceptor          |
| GTCTTTAT db/m1 | db/m | 1415 | 0.011561 | FALSE | 1.571828 | FALSE | Endothelia Aterial EC  |
| GTGACGC/ db/m1 | db/m | 7625 | 0.011561 | FALSE | 0.877862 | FALSE | Photoreceptor          |
| GTGACGC/ db/m1 | db/m | 1255 | 0.043505 | FALSE | 2.30781  | FALSE | Photoreceptor          |
| GTGACGC/ db/m1 | db/m | 1966 | 0.034954 | FALSE | 1.272751 | FALSE | Photoreceptor          |
| GTGACGC/ db/m1 | db/m | 2040 | 0.008852 | FALSE | 1.397565 | FALSE | Photoreceptor          |

|               |      |      |          |       |          |       |                        |
|---------------|------|------|----------|-------|----------|-------|------------------------|
| GTGACGC/db/m1 | db/m | 841  | 0.080645 | FALSE | 1.278708 | FALSE | Photoreceptor          |
| GTGACGC/db/m1 | db/m | 456  | 0.042704 | FALSE | 24.86559 | TRUE  |                        |
| GTGACGC/db/m1 | db/m | 2201 | 0.012303 | FALSE | 1.422373 | FALSE | Photoreceptor          |
| GTGACGC/db/m1 | db/m | 2276 | 0.014429 | FALSE | 1.352098 | FALSE | Endothelia Capillary E |
| GTGACGC/db/m1 | db/m | 924  | 0.039671 | FALSE | 1.183149 | FALSE | Neuron                 |
| GTGAGCC/db/m1 | db/m | 921  | 0.024534 | FALSE | 1.975588 | FALSE | Endothelia Capillary E |
| GTGAGCC/db/m1 | db/m | 3130 | 0.005435 | FALSE | 0.778888 | FALSE | Neuron                 |
| GTGAGCC/db/m1 | db/m | 2191 | 0.027758 | FALSE | 1.722196 | FALSE | Neuron                 |
| GTGAGCC/db/m1 | db/m | 430  | 0.013338 | FALSE | 0.507008 | FALSE | Photoreceptor          |
| GTGAGCC/db/m1 | db/m | 7646 | 0.048732 | FALSE | 0.780889 | FALSE | Photoreceptor          |
| GTGAGGA/db/m1 | db/m | 996  | 0.004762 | FALSE | 1.975437 | FALSE | Pericyte               |
| GTGAGGA/db/m1 | db/m | 565  | 0.08663  | FALSE | 2.759841 | FALSE | Endothelia Venous EC   |
| GTGAGGA/db/m1 | db/m | 3024 | 0.084562 | FALSE | 1.595662 | FALSE | Neuron                 |
| GTGAGTT/db/m1 | db/m | 690  | 0.013605 | FALSE | 0.837997 | FALSE | Photoreceptor          |
| GTGAGTT/db/m1 | db/m | 756  | 0.038953 | FALSE | 1.430181 | FALSE | Muller cell            |
| GTGAGTT/db/m1 | db/m | 6441 | 0.019455 | FALSE | 0.965556 | FALSE | Photoreceptor          |
| GTGAGTT/db/m1 | db/m | 4147 | 0.045165 | FALSE | 1.872348 | FALSE | Neuron                 |
| GTGAGTT/db/m1 | db/m | 557  | 0.018422 | FALSE | 2.985347 | FALSE | Muller cell            |
| GTGAGTT/db/m1 | db/m | 5702 | 0.030318 | FALSE | 1.019876 | FALSE | Photoreceptor          |
| GTGAGTT/db/m1 | db/m | 1688 | 0.031973 | FALSE | 2.203052 | FALSE | Neuron                 |
| GTGAGTT/db/m1 | db/m | 1344 | 0.043505 | FALSE | 1.714513 | FALSE | Photoreceptor          |
| GTGATGT/db/m1 | db/m | 4923 | 0.008032 | FALSE | 1.115571 | FALSE | Photoreceptor          |
| GTGATGT/db/m1 | db/m | 3146 | 0.025868 | FALSE | 0.496636 | FALSE | Photoreceptor          |
| GTGATGT/db/m1 | db/m | 6076 | 0.138889 | TRUE  | 1.412164 | FALSE |                        |
| GTGATGT/db/m1 | db/m | 6005 | 0.032546 | FALSE | 1.240809 | FALSE | Photoreceptor          |
| GTGATGT/db/m1 | db/m | 470  | 0.025868 | FALSE | 2.25827  | FALSE | Photoreceptor          |
| GTGATGT/db/m1 | db/m | 8163 | 0.031973 | FALSE | 0.693169 | FALSE | Photoreceptor          |
| GTGCACG/db/m1 | db/m | 2195 | 0.112477 | TRUE  | 18.98327 | TRUE  |                        |
| GTGCACG/db/m1 | db/m | 632  | 0.037564 | FALSE | 2.580779 | FALSE | Microglia              |
| GTGCACG/db/m1 | db/m | 379  | 0.046906 | FALSE | 2.656286 | FALSE | Photoreceptor          |
| GTGCACG/db/m1 | db/m | 4768 | 0.009063 | FALSE | 1.278217 | FALSE | Photoreceptor          |
| GTGCACG/db/m1 | db/m | 1887 | 0.028251 | FALSE | 1.269032 | FALSE | Endothelia Capillary E |
| GTGCACG/db/m1 | db/m | 4627 | 0.13452  | TRUE  | 7.725914 | TRUE  |                        |
| GTGCACG/db/m1 | db/m | 4599 | 0.049679 | FALSE | 1.154731 | FALSE | Endothelia Venous EC   |
| GTGCACG/db/m1 | db/m | 445  | 0.041154 | FALSE | 47.73157 | TRUE  |                        |
| GTGCACG/db/m1 | db/m | 4673 | 0.046025 | FALSE | 1.131618 | FALSE | Endothelia Venous EC   |
| GTGCACG/db/m1 | db/m | 991  | 0.037564 | FALSE | 0.687211 | FALSE | Photoreceptor          |
| GTGCACG/db/m1 | db/m | 5726 | 0.018088 | FALSE | 1.131648 | FALSE | Photoreceptor          |
| GTGCACG/db/m1 | db/m | 1808 | 0.044326 | FALSE | 1.270142 | FALSE | Endothelia Venous EC   |
| GTGCAGC/db/m1 | db/m | 1780 | 0.034954 | FALSE | 1.481533 | FALSE | Photoreceptor          |
| GTGCAGC/db/m1 | db/m | 1963 | 0.022857 | FALSE | 1.507532 | FALSE | Endothelia Capillary E |
| GTGCAGC/db/m1 | db/m | 2153 | 0.040404 | FALSE | 1.353668 | FALSE | Endothelia Aterial EC  |
| GTGCAGC/db/m1 | db/m | 3802 | 0.052669 | FALSE | 1.344377 | FALSE | Endothelia Venous EC   |
| GTGCAGC/db/m1 | db/m | 4208 | 0.068864 | FALSE | 0.998733 | FALSE | Endothelia Venous EC   |
| GTGCAGC/db/m1 | db/m | 6360 | 0.019106 | FALSE | 0.669439 | FALSE | Photoreceptor          |
| GTGCGTG/db/m1 | db/m | 3314 | 0.068864 | FALSE | 1.247936 | FALSE | Endothelia Capillary E |
| GTGCGTG/db/m1 | db/m | 2684 | 0.036891 | FALSE | 0.916978 | FALSE | Photoreceptor          |

|                |      |      |          |       |          |       |                        |
|----------------|------|------|----------|-------|----------|-------|------------------------|
| GTGCGTG/db/m1  | db/m | 3539 | 0.007833 | FALSE | 1.557489 | FALSE | Photoreceptor          |
| GTGCGTG/db/m1  | db/m | 3296 | 0.046906 | FALSE | 1.378142 | FALSE | Photoreceptor          |
| GTGCGTG/db/m1  | db/m | 663  | 0.017114 | FALSE | 2.335527 | FALSE | Endothelia Aterial EC  |
| GTGCGTG/db/m1  | db/m | 2855 | 0.009712 | FALSE | 1.936869 | FALSE | Photoreceptor          |
| GTGCGTG/db/m1  | db/m | 2461 | 0.021286 | FALSE | 1.310501 | FALSE | Endothelia Capillary E |
| GTGCGTG/db/m1  | db/m | 2254 | 0.010846 | FALSE | 1.060792 | FALSE | Endothelia Capillary E |
| GTGCGTG/db/m1  | db/m | 463  | 0.025868 | FALSE | 3.001005 | FALSE | Endothelia Capillary E |
| GTGCTGG/db/m1  | db/m | 576  | 0.033726 | FALSE | 2.188193 | FALSE | Muller cell            |
| GTGCTGG/db/m1  | db/m | 1274 | 0.052669 | FALSE | 2.624293 | FALSE | Photoreceptor          |
| GTGCTGG/db/m1  | db/m | 624  | 0.012557 | FALSE | 3.267676 | FALSE | Muller cell            |
| GTGCTGG/db/m1  | db/m | 1149 | 0.038953 | FALSE | 0.864254 | FALSE | Photoreceptor          |
| GTGCTGG/db/m1  | db/m | 2516 | 0.014997 | FALSE | 1.113813 | FALSE | Endothelia Venous EC   |
| GTGCTGG/db/m1  | db/m | 2679 | 0.004436 | FALSE | 1.298158 | FALSE | Neuron                 |
| GTGCTGG/db/m1  | db/m | 1005 | 0.035586 | FALSE | 0.773419 | FALSE | Photoreceptor          |
| GTGCTGG/db/m1  | db/m | 6573 | 0.018422 | FALSE | 1.060854 | FALSE | Photoreceptor          |
| GTGCTGG/db/m1  | db/m | 1767 | 0.055901 | FALSE | 1.692159 | FALSE | Photoreceptor          |
| GTGCTGG/db/m1  | db/m | 519  | 0.24     | TRUE  | 12.75441 | TRUE  |                        |
| GTGCTGG/db/m1  | db/m | 812  | 0.012557 | FALSE | 1.618582 | FALSE | Endothelia Capillary E |
| GTGCTTCA db/m1 | db/m | 464  | 0.011081 | FALSE | 1.36237  | FALSE | Photoreceptor          |
| GTGCTTCA db/m1 | db/m | 6125 | 0.045165 | FALSE | 0.980947 | FALSE | Photoreceptor          |
| GTGCTTCT db/m1 | db/m | 5676 | 0.100845 | TRUE  | 2.956007 | FALSE |                        |
| GTGCTTCT db/m1 | db/m | 3096 | 0.029266 | FALSE | 1.218254 | FALSE | Endothelia Venous EC   |
| GTGGAAG db/m1  | db/m | 3014 | 0.098234 | FALSE | 5.469097 | TRUE  |                        |
| GTGGAAG db/m1  | db/m | 4955 | 0.017758 | FALSE | 0.922238 | FALSE | Photoreceptor          |
| GTGGAAG db/m1  | db/m | 994  | 0.023682 | FALSE | 1.2709   | FALSE | Photoreceptor          |
| GTGGAAG db/m1  | db/m | 7098 | 0.080645 | FALSE | 1.043209 | FALSE | Photoreceptor          |
| GTGGAAG db/m1  | db/m | 1319 | 0.059406 | FALSE | 1.472312 | FALSE | Photoreceptor          |
| GTGGAAG db/m1  | db/m | 474  | 0.095727 | FALSE | 5.882353 | TRUE  |                        |
| GTGGAGA db/m1  | db/m | 2887 | 0.028754 | FALSE | 1.110995 | FALSE | Endothelia Capillary E |
| GTGGAGA db/m1  | db/m | 718  | 0.064568 | FALSE | 35.28212 | TRUE  |                        |
| GTGGAGA db/m1  | db/m | 3345 | 0.022857 | FALSE | 1.185837 | FALSE | Photoreceptor          |
| GTGGAGA db/m1  | db/m | 986  | 0.106408 | TRUE  | 32.92496 | TRUE  |                        |
| GTGGAGA db/m1  | db/m | 7572 | 0.200401 | TRUE  | 1.862264 | FALSE |                        |
| GTGGAGA db/m1  | db/m | 3674 | 0.058205 | FALSE | 1.444817 | FALSE | Photoreceptor          |
| GTGGAGA db/m1  | db/m | 1009 | 0.04192  | FALSE | 1.643208 | FALSE | Photoreceptor          |
| GTGGAGA db/m1  | db/m | 791  | 0.046906 | FALSE | 1.71159  | FALSE | Photoreceptor          |
| GTGGCGT/db/m1  | db/m | 1445 | 0.053718 | FALSE | 0.879852 | FALSE | Photoreceptor          |
| GTGGCGT/db/m1  | db/m | 904  | 0.038953 | FALSE | 2.317382 | FALSE | Photoreceptor          |
| GTGGCGT/db/m1  | db/m | 404  | 0.015581 | FALSE | 1.393689 | FALSE | Photoreceptor          |
| GTGGGAA db/m1  | db/m | 910  | 0.021286 | FALSE | 1.234921 | FALSE | Photoreceptor          |
| GTGGGAA db/m1  | db/m | 734  | 0.055901 | FALSE | 1.041608 | FALSE | Photoreceptor          |
| GTGGTTA/db/m1  | db/m | 1620 | 0.024105 | FALSE | 1.378819 | FALSE | Photoreceptor          |
| GTGGTTA/db/m1  | db/m | 7021 | 0.036891 | FALSE | 0.849198 | FALSE | Photoreceptor          |
| GTGGTTA/db/m1  | db/m | 3785 | 0.485327 | TRUE  | 2.858714 | FALSE |                        |
| GTGGTTA/db/m1  | db/m | 797  | 0.049679 | FALSE | 3.678238 | FALSE | Muller cell            |
| GTGGTTA/db/m1  | db/m | 6107 | 0.018761 | FALSE | 0.994604 | FALSE | Photoreceptor          |
| GTGGTTA/db/m1  | db/m | 408  | 0.014997 | FALSE | 3.094687 | FALSE | Photoreceptor          |

|                |      |      |          |       |          |       |                        |
|----------------|------|------|----------|-------|----------|-------|------------------------|
| GTGGTTAC db/m1 | db/m | 3133 | 0.029266 | FALSE | 1.248947 | FALSE | Endothelia Venous EC   |
| GTGGTTAC db/m1 | db/m | 4096 | 0.024971 | FALSE | 0.731334 | FALSE | Photoreceptor          |
| GTGGTTA db/m1  | db/m | 406  | 0.013605 | FALSE | 0.70523  | FALSE | Photoreceptor          |
| GTGTAAC db/m1  | db/m | 6677 | 0.031411 | FALSE | 0.967119 | FALSE | Photoreceptor          |
| GTGTAAC db/m1  | db/m | 3947 | 0.057037 | FALSE | 1.144285 | FALSE | Endothelia Venous EC   |
| GTGTAACC db/m1 | db/m | 624  | 0.043505 | FALSE | 41.68967 | TRUE  |                        |
| GTGTAAC db/m1  | db/m | 1012 | 0.054795 | FALSE | 1.38721  | FALSE | Neuron                 |
| GTGTAAC db/m1  | db/m | 855  | 0.057037 | FALSE | 1.068694 | FALSE | Photoreceptor          |
| GTGTAAC db/m1  | db/m | 6374 | 0.130374 | TRUE  | 5.218791 | TRUE  |                        |
| GTGTCCTA db/m1 | db/m | 578  | 0.053718 | FALSE | 40.94803 | TRUE  |                        |
| GTGTCCTA db/m1 | db/m | 7861 | 0.023266 | FALSE | 0.674735 | FALSE | Photoreceptor          |
| GTGTCCTC db/m1 | db/m | 7271 | 0.022455 | FALSE | 0.891368 | FALSE | Photoreceptor          |
| GTGTCCTC db/m1 | db/m | 868  | 0.200401 | TRUE  | 15.03389 | TRUE  |                        |
| GTGTCCTT db/m1 | db/m | 737  | 0.052669 | FALSE | 2.431928 | FALSE | Endothelia Capillary E |
| GTGTGAT db/m1  | db/m | 7808 | 0.024534 | FALSE | 0.68127  | FALSE | Photoreceptor          |
| GTGTGAT db/m1  | db/m | 5695 | 0.009277 | FALSE | 1.015394 | FALSE | Photoreceptor          |
| GTGTGGC db/m1  | db/m | 216  | 0.052669 | FALSE | 5.467928 | TRUE  |                        |
| GTGTTAG db/m1  | db/m | 4539 | 0.334395 | TRUE  | 2.779322 | FALSE |                        |
| GTGTTAG db/m1  | db/m | 2804 | 0.021669 | FALSE | 1.40067  | FALSE | Endothelia Venous EC   |
| GTGTTAG db/m1  | db/m | 3290 | 0.314286 | TRUE  | 3.732859 | FALSE |                        |
| GTGTTAG db/m1  | db/m | 675  | 0.019106 | FALSE | 3.980882 | FALSE | Endothelia Capillary E |
| GTGTTAG db/m1  | db/m | 276  | 0.059406 | FALSE | 7.017544 | TRUE  |                        |
| GTGTTAG db/m1  | db/m | 2207 | 0.038953 | FALSE | 0.930754 | FALSE | Photoreceptor          |
| GTGTTCCC db/m1 | db/m | 2176 | 0.009712 | FALSE | 1.120418 | FALSE | Neuron                 |
| GTGTTCCC db/m1 | db/m | 4274 | 0.164835 | TRUE  | 2.899051 | FALSE |                        |
| GTGTTCCC db/m1 | db/m | 1354 | 0.030318 | FALSE | 2.078771 | FALSE | Endothelia Capillary E |
| GTTACAG db/m1  | db/m | 2920 | 0.106408 | TRUE  | 4.908367 | FALSE |                        |
| GTTACAG db/m1  | db/m | 1252 | 0.044326 | FALSE | 1.775214 | FALSE | Photoreceptor          |
| GTTACAG db/m1  | db/m | 431  | 0.034334 | FALSE | 1.103783 | FALSE | Photoreceptor          |
| GTTACAG db/m1  | db/m | 3348 | 0.046906 | FALSE | 1.098905 | FALSE | Endothelia Venous EC   |
| GTTACAG db/m1  | db/m | 2261 | 0.043505 | FALSE | 1.64233  | FALSE | Pericyte               |
| GTTACAG db/m1  | db/m | 778  | 0.076994 | FALSE | 24.5023  | TRUE  |                        |
| GTTACAG db/m1  | db/m | 4806 | 0.021286 | FALSE | 0.544287 | FALSE | Photoreceptor          |
| GTTACAG db/m1  | db/m | 1136 | 0.053718 | FALSE | 1.27834  | FALSE | Photoreceptor          |
| GTTACAG db/m1  | db/m | 2564 | 0.08663  | FALSE | 1.401621 | FALSE | Photoreceptor          |
| GTTACCCA db/m1 | db/m | 1308 | 0.036891 | FALSE | 1.296842 | FALSE | Photoreceptor          |
| GTTACCCA db/m1 | db/m | 372  | 0.296296 | TRUE  | 10.58394 | TRUE  |                        |
| GTTACCCA db/m1 | db/m | 362  | 0.091004 | FALSE | 19.82906 | TRUE  |                        |
| GTTACCCC db/m1 | db/m | 6354 | 0.01981  | FALSE | 0.996844 | FALSE | Photoreceptor          |
| GTTACCCC db/m1 | db/m | 4241 | 0.026796 | FALSE | 1.18355  | FALSE | Photoreceptor          |
| GTTACCCC db/m1 | db/m | 1636 | 0.122388 | TRUE  | 3.249476 | FALSE |                        |
| GTTACCCC db/m1 | db/m | 3139 | 0.039671 | FALSE | 1.310591 | FALSE | Photoreceptor          |
| GTTACCCC db/m1 | db/m | 1211 | 0.03313  | FALSE | 1.022706 | FALSE | Photoreceptor          |
| GTTACCCC db/m1 | db/m | 1250 | 0.01981  | FALSE | 2.019856 | FALSE | Endothelia Capillary E |
| GTTACCCT db/m1 | db/m | 1521 | 0.032546 | FALSE | 1.673549 | FALSE | Photoreceptor          |
| GTTACCCT db/m1 | db/m | 3896 | 0.024971 | FALSE | 1.234133 | FALSE | Endothelia Venous EC   |
| GTTACGAC db/m1 | db/m | 2099 | 0.026328 | FALSE | 1.61228  | FALSE | Neuron                 |

|                |      |      |          |       |          |       |                        |
|----------------|------|------|----------|-------|----------|-------|------------------------|
| GTTACGAC db/m1 | db/m | 478  | 0.039671 | FALSE | 1.478948 | FALSE | Photoreceptor          |
| GTTAGAC db/m1  | db/m | 1554 | 0.03313  | FALSE | 1.293971 | FALSE | Neuron                 |
| GTTAGAC db/m1  | db/m | 3310 | 0.029787 | FALSE | 1.123083 | FALSE | Endothelia Venous EC   |
| GTTAGAC db/m1  | db/m | 1695 | 0.029266 | FALSE | 1.444484 | FALSE | Photoreceptor          |
| GTTAGACC db/m1 | db/m | 1404 | 0.055901 | FALSE | 1.946075 | FALSE | Photoreceptor          |
| GTTAGACC db/m1 | db/m | 7008 | 0.024971 | FALSE | 0.931096 | FALSE | Photoreceptor          |
| GTTAGACC db/m1 | db/m | 3395 | 0.013074 | FALSE | 1.49637  | FALSE | Photoreceptor          |
| GTTAGACC db/m1 | db/m | 1651 | 0.029266 | FALSE | 1.395691 | FALSE | Endothelia Aterial EC  |
| GTTAGACC db/m1 | db/m | 794  | 0.028251 | FALSE | 2.844455 | FALSE | Endothelia Capillary E |
| GTTAGACC db/m1 | db/m | 844  | 0.029266 | FALSE | 0.974907 | FALSE | Photoreceptor          |
| GTTAGACC db/m1 | db/m | 698  | 0.08663  | FALSE | 14.56835 | TRUE  |                        |
| GTTAGTG db/m1  | db/m | 672  | 0.015879 | FALSE | 0.716556 | FALSE | Photoreceptor          |
| GTTAGTG db/m1  | db/m | 1901 | 0.063221 | FALSE | 1.371315 | FALSE | Photoreceptor          |
| GTTAGTG db/m1  | db/m | 733  | 0.039671 | FALSE | 1.674708 | FALSE | Endothelia Capillary E |
| GTTAGTG db/m1  | db/m | 675  | 0.084562 | FALSE | 2.336714 | FALSE | Photoreceptor          |
| GTTAGTG db/m1  | db/m | 1276 | 0.017434 | FALSE | 1.670229 | FALSE | Endothelia Capillary E |
| GTTAGTG db/m1  | db/m | 1315 | 0.028754 | FALSE | 2.407506 | FALSE | Endothelia Capillary E |
| GTTAGTG db/m1  | db/m | 5461 | 0.135645 | TRUE  | 3.086715 | FALSE |                        |
| GTTAGTG db/m1  | db/m | 5852 | 0.01981  | FALSE | 0.917685 | FALSE | Photoreceptor          |
| GTTATGG db/m1  | db/m | 360  | 0.023266 | FALSE | 2.258002 | FALSE | Photoreceptor          |
| GTTATGG db/m1  | db/m | 5970 | 0.015879 | FALSE | 1.137852 | FALSE | Photoreceptor          |
| GTTATGG db/m1  | db/m | 1246 | 0.039671 | FALSE | 0.706045 | FALSE | Photoreceptor          |
| GTTATGG db/m1  | db/m | 1344 | 0.021286 | FALSE | 1.401989 | FALSE | Endothelia Capillary E |
| GTTATGG db/m1  | db/m | 2610 | 0.010384 | FALSE | 1.043143 | FALSE | Neuron                 |
| GTTATGG db/m1  | db/m | 6467 | 0.019106 | FALSE | 1.166824 | FALSE | Photoreceptor          |
| GTTATGG db/m1  | db/m | 2318 | 0.053718 | FALSE | 1.727167 | FALSE | Photoreceptor          |
| GTTATGG db/m1  | db/m | 411  | 0.027758 | FALSE | 3.542217 | FALSE | Endothelia Capillary E |
| GTTATGG db/m1  | db/m | 353  | 0.020536 | FALSE | 3.694771 | FALSE | Endothelia Capillary E |
| GTTATGG db/m1  | db/m | 6960 | 0.122691 | TRUE  | 2.036214 | FALSE |                        |
| GTTCATTA db/m1 | db/m | 499  | 0.103567 | TRUE  | 13.47882 | TRUE  |                        |
| GTTCATTC db/m1 | db/m | 4314 | 0.031411 | FALSE | 1.079657 | FALSE | Photoreceptor          |
| GTTCATTC db/m1 | db/m | 487  | 0.041154 | FALSE | 1.726411 | FALSE | Neuron                 |
| GTTCATTG db/m1 | db/m | 448  | 0.012557 | FALSE | 1.551939 | FALSE | Photoreceptor          |
| GTTCATTG db/m1 | db/m | 7777 | 0.022059 | FALSE | 0.875729 | FALSE | Photoreceptor          |
| GTTCATTG db/m1 | db/m | 1911 | 0.014711 | FALSE | 3.735959 | FALSE | Muller cell            |
| GTTCATTG db/m1 | db/m | 2412 | 0.088776 | FALSE | 17.86083 | TRUE  |                        |
| GTTCATTG db/m1 | db/m | 1677 | 0.05065  | FALSE | 1.54209  | FALSE | Photoreceptor          |
| GTTCATTT db/m1 | db/m | 8309 | 0.020171 | FALSE | 0.799369 | FALSE | Photoreceptor          |
| GTTCATTT db/m1 | db/m | 622  | 0.03313  | FALSE | 63.30103 | TRUE  |                        |
| GTTCCGTA db/m1 | db/m | 4226 | 0.016488 | FALSE | 1.191276 | FALSE | Endothelia Venous EC   |
| GTTCCGTA db/m1 | db/m | 2044 | 0.038953 | FALSE | 3.462272 | FALSE | Muller cell            |
| GTTCCGTA db/m1 | db/m | 3646 | 0.030318 | FALSE | 0.879307 | FALSE | Photoreceptor          |
| GTTCCGTA db/m1 | db/m | 376  | 0.037564 | FALSE | 4.360484 | FALSE | Muller cell            |
| GTTCCGTC db/m1 | db/m | 5004 | 0.028754 | FALSE | 1.13356  | FALSE | Photoreceptor          |
| GTTCCGTT db/m1 | db/m | 6106 | 0.013605 | FALSE | 1.001558 | FALSE | Photoreceptor          |
| GTTCCGTT db/m1 | db/m | 515  | 0.078788 | FALSE | 2.399988 | FALSE | Photoreceptor          |
| GTTCGCTC db/m1 | db/m | 1283 | 0.588076 | TRUE  | 1.956107 | FALSE |                        |



|                |      |      |          |       |          |       |                        |
|----------------|------|------|----------|-------|----------|-------|------------------------|
| GTTGCTC db/m1  | db/m | 429  | 0.071958 | FALSE | 10.58201 | TRUE  |                        |
| GTTGCTC db/m1  | db/m | 508  | 0.053718 | FALSE | 2.961055 | FALSE | Endothelia Capillary E |
| GTTGCTT db/m1  | db/m | 4181 | 0.020171 | FALSE | 0.729421 | FALSE | Photoreceptor          |
| GTTGCTT db/m1  | db/m | 8051 | 0.018761 | FALSE | 0.744758 | FALSE | Photoreceptor          |
| GTTGCTT db/m1  | db/m | 3578 | 0.009933 | FALSE | 1.687256 | FALSE | Photoreceptor          |
| GTTCTATA db/m1 | db/m | 964  | 0.033726 | FALSE | 0.562736 | FALSE | Photoreceptor          |
| GTTCTATC db/m1 | db/m | 1147 | 0.034954 | FALSE | 1.460658 | FALSE | Photoreceptor          |
| GTTCTATC db/m1 | db/m | 878  | 0.022455 | FALSE | 2.676683 | FALSE | Photoreceptor          |
| GTTCTATC db/m1 | db/m | 765  | 0.065957 | FALSE | 4.635311 | FALSE | Muller cell            |
| GTTCTATG db/m1 | db/m | 3123 | 0.082569 | FALSE | 1.663574 | FALSE | Photoreceptor          |
| GTTCTATG db/m1 | db/m | 440  | 0.036891 | FALSE | 59.79709 | TRUE  |                        |
| GTTCTATT db/m1 | db/m | 3197 | 0.012814 | FALSE | 0.900291 | FALSE | Neuron                 |
| GTTCTATT db/m1 | db/m | 392  | 0.029787 | FALSE | 3.794254 | FALSE | Microglia              |
| GTTGAAC/ db/m1 | db/m | 468  | 0.041154 | FALSE | 1.332789 | FALSE | Photoreceptor          |
| GTTGAAC/ db/m1 | db/m | 1045 | 0.03313  | FALSE | 1.349798 | FALSE | Endothelia Venous EC   |
| GTTGAAC/ db/m1 | db/m | 445  | 0.043505 | FALSE | 8.143322 | TRUE  |                        |
| GTTGAAC( db/m1 | db/m | 6909 | 0.036891 | FALSE | 0.904701 | FALSE | Photoreceptor          |
| GTTGAAC( db/m1 | db/m | 499  | 0.357022 | TRUE  | 13.43458 | TRUE  |                        |
| GTTGAAC( db/m1 | db/m | 6830 | 0.034334 | FALSE | 0.767902 | FALSE | Photoreceptor          |
| GTTGAAC( db/m1 | db/m | 3015 | 0.070386 | FALSE | 11.3982  | TRUE  |                        |
| GTTGAACI db/m1 | db/m | 1759 | 0.039671 | FALSE | 1.399949 | FALSE | Photoreceptor          |
| GTTGCGG( db/m1 | db/m | 437  | 0.014151 | FALSE | 1.326493 | FALSE | Photoreceptor          |
| GTTGCGG( db/m1 | db/m | 8037 | 0.067388 | FALSE | 0.874352 | FALSE | Photoreceptor          |
| GTTGCGG( db/m1 | db/m | 2677 | 0.020908 | FALSE | 1.391534 | FALSE | Endothelia Venous EC   |
| GTTGCGG  db/m1 | db/m | 6819 | 0.011081 | FALSE | 1.049985 | FALSE | Photoreceptor          |
| GTTGCTCA db/m1 | db/m | 2851 | 0.08663  | FALSE | 1.010636 | FALSE | Photoreceptor          |
| GTTGCTCC db/m1 | db/m | 4410 | 0.032546 | FALSE | 1.111103 | FALSE | Endothelia Venous EC   |
| GTTGCTCC db/m1 | db/m | 1273 | 0.028754 | FALSE | 1.590166 | FALSE | Photoreceptor          |
| GTTGCTCT db/m1 | db/m | 3758 | 0.110901 | TRUE  | 3.9807   | FALSE |                        |
| GTTGCTCT db/m1 | db/m | 4721 | 0.020536 | FALSE | 0.920095 | FALSE | Photoreceptor          |
| GTTGCTCT db/m1 | db/m | 4177 | 0.036891 | FALSE | 1.356259 | FALSE | Photoreceptor          |
| GTTGCTCT db/m1 | db/m | 2069 | 0.042704 | FALSE | 1.349394 | FALSE | Photoreceptor          |
| GTTGTAG/ db/m1 | db/m | 6354 | 0.013074 | FALSE | 0.95988  | FALSE | Photoreceptor          |
| GTTGTAG/ db/m1 | db/m | 443  | 0.078788 | FALSE | 2.926804 | FALSE | Pericyte               |
| GTTGTAG( db/m1 | db/m | 4048 | 0.008852 | FALSE | 0.925615 | FALSE | Neuron                 |
| GTTGTAG( db/m1 | db/m | 3970 | 0.033726 | FALSE | 0.955109 | FALSE | Photoreceptor          |
| GTTGTAG( db/m1 | db/m | 4566 | 0.13452  | TRUE  | 5.493208 | TRUE  |                        |
| GTTGTAG( db/m1 | db/m | 672  | 0.314286 | TRUE  | 24.95798 | TRUE  |                        |
| GTTGTAGI db/m1 | db/m | 883  | 0.004927 | FALSE | 2.177677 | FALSE | Pericyte               |
| GTTGTCCA db/m1 | db/m | 8203 | 0.058205 | FALSE | 0.718807 | FALSE | Photoreceptor          |
| GTTGTCCC db/m1 | db/m | 2204 | 0.019455 | FALSE | 1.200227 | FALSE | Endothelia Capillary E |
| GTTGTCCC db/m1 | db/m | 1666 | 0.051646 | FALSE | 0.899474 | FALSE | Photoreceptor          |
| GTTGTCCC db/m1 | db/m | 1057 | 0.038251 | FALSE | 3.159756 | FALSE | Photoreceptor          |
| GTTGTCCT db/m1 | db/m | 3780 | 0.064568 | FALSE | 1.172896 | FALSE | Photoreceptor          |
| GTTGTCCT db/m1 | db/m | 2428 | 0.016181 | FALSE | 1.318184 | FALSE | Endothelia Capillary E |
| GTTGTGA/ db/m1 | db/m | 1397 | 0.045165 | FALSE | 2.296829 | FALSE | Endothelia Capillary E |
| GTTGTGA/ db/m1 | db/m | 5609 | 0.021286 | FALSE | 0.956876 | FALSE | Photoreceptor          |

|                |      |      |          |       |          |       |                        |
|----------------|------|------|----------|-------|----------|-------|------------------------|
| GTTGTGA/ db/m1 | db/m | 1000 | 0.034334 | FALSE | 1.890031 | FALSE | Endothelia Capillary E |
| GTTGTGA/ db/m1 | db/m | 651  | 0.013876 | FALSE | 0.952794 | FALSE | Photoreceptor          |
| GTTGTGA( db/m1 | db/m | 3081 | 0.025416 | FALSE | 1.124226 | FALSE | Endothelia Venous EC   |
| GTTGTGA( db/m1 | db/m | 818  | 0.023682 | FALSE | 0.850386 | FALSE | Photoreceptor          |
| GTTGTGA( db/m1 | db/m | 2734 | 0.027758 | FALSE | 1.416659 | FALSE | Endothelia Aterial EC  |
| GTTGTGA  db/m1 | db/m | 742  | 0.023266 | FALSE | 3.852307 | FALSE | Muller cell            |
| GTTGTGA  db/m1 | db/m | 7498 | 0.012814 | FALSE | 0.91864  | FALSE | Photoreceptor          |
| GTTGTGA  db/m1 | db/m | 1385 | 0.03313  | FALSE | 1.083293 | FALSE | Photoreceptor          |
| GTTTACTC db/m1 | db/m | 1194 | 0.095727 | FALSE | 2.877505 | FALSE | Muller cell            |
| GTTTACTC db/m1 | db/m | 2008 | 0.015287 | FALSE | 1.120167 | FALSE | Endothelia Venous EC   |
| GTTTACTC db/m1 | db/m | 606  | 0.164835 | TRUE  | 10.77636 | TRUE  |                        |
| GTTTACTG db/m1 | db/m | 1709 | 0.022059 | FALSE | 0.72374  | FALSE | Photoreceptor          |
| GTTTACTG db/m1 | db/m | 6864 | 0.008032 | FALSE | 0.947174 | FALSE | Photoreceptor          |
| GTTTACTT db/m1 | db/m | 1458 | 0.003959 | FALSE | 1.452001 | FALSE | Pericyte               |
| GTTTACTT db/m1 | db/m | 4377 | 0.039671 | FALSE | 1.111811 | FALSE | Photoreceptor          |
| GTTTACTT db/m1 | db/m | 4391 | 0.051646 | FALSE | 1.389424 | FALSE | Photoreceptor          |
| GTTTACTT db/m1 | db/m | 1334 | 0.025868 | FALSE | 1.057699 | FALSE | Photoreceptor          |
| GTTTGGA/ db/m1 | db/m | 1437 | 0.012557 | FALSE | 1.26467  | FALSE | Pericyte               |
| GTTTGGA( db/m1 | db/m | 759  | 0.013876 | FALSE | 1.006459 | FALSE | Photoreceptor          |
| GTTTGGA( db/m1 | db/m | 1677 | 0.019106 | FALSE | 0.97094  | FALSE | Photoreceptor          |
| GTTTGGA  db/m1 | db/m | 571  | 0.048732 | FALSE | 2.487508 | FALSE | Neuron                 |
| GTTTGGA  db/m1 | db/m | 1788 | 0.020536 | FALSE | 1.325456 | FALSE | Endothelia Capillary E |
| GTTTGGA  db/m1 | db/m | 4562 | 0.022857 | FALSE | 1.024526 | FALSE | Photoreceptor          |
| GTTTGGA  db/m1 | db/m | 505  | 0.029266 | FALSE | 0.877557 | FALSE | Photoreceptor          |
| GTTTGGA  db/m1 | db/m | 1184 | 0.051646 | FALSE | 0.682569 | FALSE | Photoreceptor          |
| GTTTGGA  db/m1 | db/m | 461  | 0.019106 | FALSE | 1.971526 | FALSE | Photoreceptor          |
| GTTTGGA  db/m1 | db/m | 2111 | 0.024971 | FALSE | 1.727746 | FALSE | Neuron                 |
| TAACACG/ db/m1 | db/m | 6345 | 0.153234 | TRUE  | 1.510146 | FALSE |                        |
| TAACACG/ db/m1 | db/m | 1554 | 0.024534 | FALSE | 0.569848 | FALSE | Photoreceptor          |
| TAACACG/ db/m1 | db/m | 425  | 0.048732 | FALSE | 2.580826 | FALSE | Photoreceptor          |
| TAACACG( db/m1 | db/m | 1102 | 0.018422 | FALSE | 0.463267 | FALSE | Photoreceptor          |
| TAACACG( db/m1 | db/m | 397  | 0.038953 | FALSE | 3.04354  | FALSE | Photoreceptor          |
| TAACACG( db/m1 | db/m | 7277 | 0.00687  | FALSE | 0.856884 | FALSE | Photoreceptor          |
| TAACACGT db/m1 | db/m | 934  | 0.042704 | FALSE | 0.832723 | FALSE | Photoreceptor          |
| TAACACGT db/m1 | db/m | 591  | 0.027758 | FALSE | 3.267591 | FALSE | Muller cell            |
| TAACCAG/ db/m1 | db/m | 4737 | 0.053718 | FALSE | 1.086619 | FALSE | Photoreceptor          |
| TAACCAG/ db/m1 | db/m | 3094 | 0.017758 | FALSE | 1.273661 | FALSE | Endothelia Capillary E |
| TAACCAG/ db/m1 | db/m | 811  | 0.053718 | FALSE | 50.33784 | TRUE  |                        |
| TAACCAG( db/m1 | db/m | 3130 | 0.015581 | FALSE | 1.37703  | FALSE | Endothelia Venous EC   |
| TAACCAG( db/m1 | db/m | 7385 | 0.024105 | FALSE | 0.766758 | FALSE | Photoreceptor          |
| TAACCAG( db/m1 | db/m | 2663 | 0.031973 | FALSE | 1.63729  | FALSE | Neuron                 |
| TAACCAG( db/m1 | db/m | 1546 | 0.076994 | FALSE | 0.693019 | FALSE | Photoreceptor          |
| TAACCAGT db/m1 | db/m | 1628 | 0.020536 | FALSE | 0.418662 | FALSE | Photoreceptor          |
| TAACCAGT db/m1 | db/m | 2619 | 0.063221 | FALSE | 1.613225 | FALSE | Photoreceptor          |
| TAACGAC/ db/m1 | db/m | 1046 | 0.006683 | FALSE | 1.912517 | FALSE | Endothelia Capillary E |
| TAACGAC/ db/m1 | db/m | 1031 | 0.084562 | FALSE | 1.789608 | FALSE | Endothelia Capillary E |
| TAACGAC/ db/m1 | db/m | 530  | 0.093319 | FALSE | 15.70352 | TRUE  |                        |

|                 |      |      |          |       |          |       |                        |
|-----------------|------|------|----------|-------|----------|-------|------------------------|
| TAACGAC/ db/m1  | db/m | 825  | 0.037564 | FALSE | 1.122584 | FALSE | Photoreceptor          |
| TAACGAC/ db/m1  | db/m | 4698 | 0.016488 | FALSE | 1.075419 | FALSE | Photoreceptor          |
| TAACGAC( db/m1  | db/m | 1382 | 0.022455 | FALSE | 1.024721 | FALSE | Photoreceptor          |
| TAACGAC( db/m1  | db/m | 6711 | 0.022455 | FALSE | 0.7683   | FALSE | Photoreceptor          |
| TAACGACT db/m1  | db/m | 1601 | 0.027273 | FALSE | 1.242541 | FALSE | Photoreceptor          |
| TAACGACT db/m1  | db/m | 523  | 0.047807 | FALSE | 41.63669 | TRUE  |                        |
| TAAC TTCA db/m1 | db/m | 823  | 0.08663  | FALSE | 2.327718 | FALSE | Endothelia Capillary E |
| TAAC TTCC db/m1 | db/m | 2427 | 0.051646 | FALSE | 9.277734 | TRUE  |                        |
| TAAC TTCC db/m1 | db/m | 986  | 0.055901 | FALSE | 47.87172 | TRUE  |                        |
| TAAC TTCC db/m1 | db/m | 732  | 0.038953 | FALSE | 3.081622 | FALSE | Muller cell            |
| TAAC TTCC db/m1 | db/m | 812  | 0.067388 | FALSE | 2.153852 | FALSE | Photoreceptor          |
| TAAC TTCC db/m1 | db/m | 855  | 0.006683 | FALSE | 2.036187 | FALSE | Neuron                 |
| TAAC TTCT db/m1 | db/m | 2207 | 0.022059 | FALSE | 1.688939 | FALSE | Endothelia Capillary E |
| TAAGCAC/ db/m1  | db/m | 493  | 0.010384 | FALSE | 1.3409   | FALSE | Photoreceptor          |
| TAAGCACT db/m1  | db/m | 6380 | 0.028251 | FALSE | 0.759945 | FALSE | Photoreceptor          |
| TAAGCCA/ db/m1  | db/m | 7840 | 0.060641 | FALSE | 0.751923 | FALSE | Photoreceptor          |
| TAAGCCA( db/m1  | db/m | 5256 | 0.029266 | FALSE | 0.879641 | FALSE | Neuron                 |
| TAAGCCA( db/m1  | db/m | 475  | 0.063221 | FALSE | 4.54466  | FALSE | Photoreceptor          |
| TAAGCCA( db/m1  | db/m | 3605 | 0.034954 | FALSE | 2.094423 | FALSE | Neuron                 |
| TAAGCCA( db/m1  | db/m | 341  | 0.011805 | FALSE | 3.979437 | FALSE | Photoreceptor          |
| TAAGCCAT db/m1  | db/m | 3074 | 0.016799 | FALSE | 1.370073 | FALSE | Photoreceptor          |
| TAAGCCAT db/m1  | db/m | 1724 | 0.017114 | FALSE | 1.465599 | FALSE | Endothelia Capillary E |
| TAAGCGT/ db/m1  | db/m | 2808 | 0.037564 | FALSE | 0.929581 | FALSE | Photoreceptor          |
| TAAGCGT( db/m1  | db/m | 432  | 0.029787 | FALSE | 58.66142 | TRUE  |                        |
| TAAGCGT( db/m1  | db/m | 3735 | 0.024105 | FALSE | 1.148962 | FALSE | Endothelia Venous EC   |
| TAAGCGT( db/m1  | db/m | 2408 | 0.009712 | FALSE | 1.302647 | FALSE | Endothelia Capillary E |
| TAAGCGT db/m1   | db/m | 4811 | 0.055901 | FALSE | 1.164839 | FALSE | Endothelia Venous EC   |
| TAAGCGT db/m1   | db/m | 1616 | 0.011319 | FALSE | 1.580706 | FALSE | Endothelia Capillary E |
| TAAGCGT db/m1   | db/m | 376  | 0.037564 | FALSE | 3.456193 | FALSE | Muller cell            |
| TAAGTCG/ db/m1  | db/m | 774  | 0.064568 | FALSE | 1.263435 | FALSE | Photoreceptor          |
| TAAGTCG/ db/m1  | db/m | 347  | 0.018761 | FALSE | 3.567812 | FALSE | Endothelia Capillary E |
| TAAGTCG/ db/m1  | db/m | 4716 | 0.130374 | TRUE  | 3.317476 | FALSE |                        |
| TAAGTCG( db/m1  | db/m | 2439 | 0.016181 | FALSE | 0.39328  | FALSE | Photoreceptor          |
| TAAGTCG( db/m1  | db/m | 4242 | 0.093319 | FALSE | 7.222809 | TRUE  |                        |
| TAAGTCG( db/m1  | db/m | 602  | 0.029787 | FALSE | 0.513287 | FALSE | Photoreceptor          |
| TAAGTCG( db/m1  | db/m | 1247 | 0.055901 | FALSE | 2.145903 | FALSE | Photoreceptor          |
| TAAGTCG db/m1   | db/m | 1531 | 0.17103  | TRUE  | 9.8623   | TRUE  |                        |
| TAAGTCG db/m1   | db/m | 390  | 0.012052 | FALSE | 2.631465 | FALSE | Photoreceptor          |
| TAATCTCA db/m1  | db/m | 2840 | 0.068864 | FALSE | 1.138827 | FALSE | Photoreceptor          |
| TAATCTCA db/m1  | db/m | 4438 | 0.024534 | FALSE | 1.011613 | FALSE | Photoreceptor          |
| TAATCTCC db/m1  | db/m | 2930 | 0.020908 | FALSE | 0.719801 | FALSE | Photoreceptor          |
| TAATCTCC db/m1  | db/m | 2424 | 0.020171 | FALSE | 0.722984 | FALSE | Photoreceptor          |
| TAATCTCC db/m1  | db/m | 1106 | 0.038953 | FALSE | 1.379979 | FALSE | Photoreceptor          |
| TAATCTCC db/m1  | db/m | 558  | 0.15354  | TRUE  | 50.21038 | TRUE  |                        |
| TAATCTCG db/m1  | db/m | 957  | 0.019106 | FALSE | 1.976179 | FALSE | Photoreceptor          |
| TAATCTCT db/m1  | db/m | 432  | 0.017758 | FALSE | 0.289063 | FALSE | Photoreceptor          |
| TAATTCCA db/m1  | db/m | 694  | 0.05065  | FALSE | 3.785535 | FALSE | Muller cell            |

|                |      |      |          |       |          |       |                        |
|----------------|------|------|----------|-------|----------|-------|------------------------|
| TAATCCCC db/m1 | db/m | 3979 | 0.030318 | FALSE | 0.909627 | FALSE | Endothelia Venous EC   |
| TAATCCCC db/m1 | db/m | 704  | 0.067388 | FALSE | 3.248475 | FALSE | Muller cell            |
| TAATCCCG db/m1 | db/m | 474  | 0.098234 | FALSE | 2.346961 | FALSE | Photoreceptor          |
| TAATTCCT db/m1 | db/m | 3005 | 0.033726 | FALSE | 1.444937 | FALSE | Neuron                 |
| TACAACG db/m1  | db/m | 709  | 0.041154 | FALSE | 2.25183  | FALSE | Photoreceptor          |
| TACAACG db/m1  | db/m | 3176 | 0.018761 | FALSE | 1.990597 | FALSE | Neuron                 |
| TACAACG db/m1  | db/m | 2880 | 0.017434 | FALSE | 1.129413 | FALSE | Endothelia Capillary E |
| TACAACG db/m1  | db/m | 3402 | 0.017114 | FALSE | 1.086924 | FALSE | Endothelia Venous EC   |
| TACAACG db/m1  | db/m | 1853 | 0.032546 | FALSE | 0.933152 | FALSE | Photoreceptor          |
| TACACCCA db/m1 | db/m | 1008 | 0.036232 | FALSE | 1.883384 | FALSE | Photoreceptor          |
| TACACCCA db/m1 | db/m | 837  | 0.016799 | FALSE | 0.978755 | FALSE | Photoreceptor          |
| TACACCCT db/m1 | db/m | 5125 | 0.013876 | FALSE | 0.969426 | FALSE | Endothelia Venous EC   |
| TACACCCT db/m1 | db/m | 351  | 0.024534 | FALSE | 15.48757 | TRUE  |                        |
| TACAGGT db/m1  | db/m | 507  | 0.01981  | FALSE | 2.49696  | FALSE | Photoreceptor          |
| TACAGGT db/m1  | db/m | 1693 | 0.060641 | FALSE | 1.162741 | FALSE | Photoreceptor          |
| TACAGGT db/m1  | db/m | 459  | 0.030859 | FALSE | 75.00977 | TRUE  |                        |
| TACAGGT db/m1  | db/m | 2866 | 0.020536 | FALSE | 1.313643 | FALSE | Endothelia Capillary E |
| TACAGGT db/m1  | db/m | 1297 | 0.023266 | FALSE | 1.258804 | FALSE | Photoreceptor          |
| TACAGGT db/m1  | db/m | 780  | 0.209157 | TRUE  | 10.35104 | TRUE  |                        |
| TACAGGT db/m1  | db/m | 954  | 0.034954 | FALSE | 2.089016 | FALSE | Photoreceptor          |
| TACAGGT db/m1  | db/m | 2288 | 0.071958 | FALSE | 20.76952 | TRUE  |                        |
| TACATTCA db/m1 | db/m | 3331 | 0.013605 | FALSE | 1.535851 | FALSE | Photoreceptor          |
| TACATTCA db/m1 | db/m | 697  | 0.029266 | FALSE | 3.592303 | FALSE | Muller cell            |
| TACATTCC db/m1 | db/m | 797  | 0.026796 | FALSE | 4.707554 | FALSE | Muller cell            |
| TACATTCC db/m1 | db/m | 6992 | 0.011561 | FALSE | 0.937898 | FALSE | Photoreceptor          |
| TACATTCC db/m1 | db/m | 606  | 0.044326 | FALSE | 23.46369 | TRUE  |                        |
| TACATTCC db/m1 | db/m | 1143 | 0.070386 | FALSE | 0.398184 | FALSE | Photoreceptor          |
| TACATTCT db/m1 | db/m | 3877 | 0.018761 | FALSE | 1.161394 | FALSE | Endothelia Venous EC   |
| TACATTCT db/m1 | db/m | 3125 | 0.071958 | FALSE | 1.382013 | FALSE | Photoreceptor          |
| TACCCACA db/m1 | db/m | 1506 | 0.075259 | FALSE | 1.811392 | FALSE | Photoreceptor          |
| TACCCACA db/m1 | db/m | 7077 | 0.036891 | FALSE | 0.895158 | FALSE | Photoreceptor          |
| TACCCACC db/m1 | db/m | 8294 | 0.015287 | FALSE | 0.756874 | FALSE | Photoreceptor          |
| TACCCACC db/m1 | db/m | 3186 | 0.048732 | FALSE | 1.39886  | FALSE | Photoreceptor          |
| TACCCACC db/m1 | db/m | 499  | 0.024105 | FALSE | 1.572306 | FALSE | Photoreceptor          |
| TACCCACT db/m1 | db/m | 397  | 0.088776 | FALSE | 3.335391 | FALSE | Photoreceptor          |
| TACCCACT db/m1 | db/m | 1325 | 0.113205 | TRUE  | 4.667329 | FALSE |                        |
| TACCCGTA db/m1 | db/m | 515  | 0.012557 | FALSE | 2.3208   | FALSE | Photoreceptor          |
| TACCCGTA db/m1 | db/m | 1681 | 0.036232 | FALSE | 1.687362 | FALSE | Photoreceptor          |
| TACCCGTT db/m1 | db/m | 665  | 0.041154 | FALSE | 1.598705 | FALSE | Photoreceptor          |
| TACCGAA db/m1  | db/m | 1172 | 0.080645 | FALSE | 1.510003 | FALSE | Photoreceptor          |
| TACCGAA db/m1  | db/m | 4033 | 0.032546 | FALSE | 1.031229 | FALSE | Endothelia Capillary E |
| TACCGAA db/m1  | db/m | 6543 | 0.012303 | FALSE | 1.203985 | FALSE | Photoreceptor          |
| TACCGAAC db/m1 | db/m | 842  | 0.037564 | FALSE | 0.629796 | FALSE | Photoreceptor          |
| TACCGAAC db/m1 | db/m | 8058 | 0.061912 | FALSE | 0.79228  | FALSE | Photoreceptor          |
| TACCGAAC db/m1 | db/m | 6397 | 0.013876 | FALSE | 1.068114 | FALSE | Photoreceptor          |
| TACCGAAT db/m1 | db/m | 2321 | 0.057037 | FALSE | 1.217128 | FALSE | Photoreceptor          |
| TACCGGG db/m1  | db/m | 1094 | 0.027273 | FALSE | 0.867818 | FALSE | Photoreceptor          |

|                |      |      |          |       |          |       |                        |
|----------------|------|------|----------|-------|----------|-------|------------------------|
| TACCGGG/ db/m1 | db/m | 2909 | 0.24     | TRUE  | 13.99459 | TRUE  |                        |
| TACCGGG( db/m1 | db/m | 1605 | 0.041154 | FALSE | 0.791952 | FALSE | Photoreceptor          |
| TACCGGG( db/m1 | db/m | 2935 | 0.114406 | TRUE  | 4.255319 | FALSE |                        |
| TACCGGG  db/m1 | db/m | 4269 | 0.045165 | FALSE | 1.464552 | FALSE | Photoreceptor          |
| TACCGGG  db/m1 | db/m | 492  | 0.009712 | FALSE | 2.40013  | FALSE | Endothelia Capillary E |
| TACCGGG  db/m1 | db/m | 1501 | 0.028754 | FALSE | 1.454474 | FALSE | Pericyte               |
| TACCGGG  db/m1 | db/m | 4704 | 0.057037 | FALSE | 1.249294 | FALSE | Photoreceptor          |
| TACCTCGA db/m1 | db/m | 2180 | 0.073582 | FALSE | 1.332221 | FALSE | Photoreceptor          |
| TACCTCGA db/m1 | db/m | 1509 | 0.04192  | FALSE | 0.872234 | FALSE | Photoreceptor          |
| TACCTCGA db/m1 | db/m | 928  | 0.036891 | FALSE | 0.781796 | FALSE | Photoreceptor          |
| TACCTCGG db/m1 | db/m | 378  | 0.098234 | FALSE | 2.798724 | FALSE | Microglia              |
| TACCTCGG db/m1 | db/m | 1198 | 0.076994 | FALSE | 2.304406 | FALSE | Muller cell            |
| TACCTGCC db/m1 | db/m | 840  | 0.082569 | FALSE | 39.8627  | TRUE  |                        |
| TACCTGCC db/m1 | db/m | 2806 | 0.037564 | FALSE | 1.03384  | FALSE | Photoreceptor          |
| TACCTGCC db/m1 | db/m | 965  | 0.043505 | FALSE | 1.984974 | FALSE | Microglia              |
| TACCTGCT db/m1 | db/m | 429  | 0.011081 | FALSE | 0.512638 | FALSE | Photoreceptor          |
| TACCTGCT db/m1 | db/m | 986  | 0.093319 | FALSE | 1.794971 | FALSE | Photoreceptor          |
| TACGCTCA db/m1 | db/m | 2119 | 0.057037 | FALSE | 1.232706 | FALSE | Photoreceptor          |
| TACGCTCC db/m1 | db/m | 459  | 0.098234 | FALSE | 24.18033 | TRUE  |                        |
| TACGCTCC db/m1 | db/m | 1501 | 0.067388 | FALSE | 0.999447 | FALSE | Photoreceptor          |
| TACGCTCC db/m1 | db/m | 8556 | 0.016181 | FALSE | 0.966808 | FALSE | Photoreceptor          |
| TACGCTCC db/m1 | db/m | 1377 | 0.037564 | FALSE | 1.149049 | FALSE | Photoreceptor          |
| TACGCTCC db/m1 | db/m | 5167 | 0.028251 | FALSE | 0.946583 | FALSE | Photoreceptor          |
| TACGCTCC db/m1 | db/m | 3939 | 0.030318 | FALSE | 1.033356 | FALSE | Endothelia Venous EC   |
| TACGCTCC db/m1 | db/m | 4182 | 0.026328 | FALSE | 0.972983 | FALSE | Photoreceptor          |
| TACGGGC/ db/m1 | db/m | 787  | 0.013338 | FALSE | 2.229203 | FALSE | Pericyte               |
| TACGGGC/ db/m1 | db/m | 8178 | 0.024534 | FALSE | 0.543315 | FALSE | Photoreceptor          |
| TACGGGC/ db/m1 | db/m | 1119 | 0.026796 | FALSE | 1.445214 | FALSE | Photoreceptor          |
| TACGGGC( db/m1 | db/m | 1208 | 0.021669 | FALSE | 0.730673 | FALSE | Photoreceptor          |
| TACGGGC( db/m1 | db/m | 670  | 0.030318 | FALSE | 2.999192 | FALSE | Photoreceptor          |
| TACGGTA/ db/m1 | db/m | 3962 | 0.016181 | FALSE | 1.070618 | FALSE | Endothelia Capillary E |
| TACGGTA/ db/m1 | db/m | 5092 | 0.049679 | FALSE | 1.034939 | FALSE | Photoreceptor          |
| TACGGTA( db/m1 | db/m | 408  | 0.076994 | FALSE | 3.26681  | FALSE | Muller cell            |
| TACGGTA( db/m1 | db/m | 8191 | 0.012052 | FALSE | 1.014954 | FALSE | Photoreceptor          |
| TACGGTA( db/m1 | db/m | 751  | 0.052669 | FALSE | 1.380434 | FALSE | Photoreceptor          |
| TACGGTA( db/m1 | db/m | 8290 | 0.024971 | FALSE | 0.65562  | FALSE | Photoreceptor          |
| TACGGTA  db/m1 | db/m | 431  | 0.091004 | FALSE | 3.961084 | FALSE | Microglia              |
| TACGGTA  db/m1 | db/m | 7822 | 0.009277 | FALSE | 0.923775 | FALSE | Photoreceptor          |
| TACGGTA  db/m1 | db/m | 3621 | 0.073582 | FALSE | 1.329575 | FALSE | Photoreceptor          |
| TACGTCCA db/m1 | db/m | 1502 | 0.08663  | FALSE | 1.700051 | FALSE | Photoreceptor          |
| TACGTCCG db/m1 | db/m | 417  | 0.015879 | FALSE | 0.681096 | FALSE | Photoreceptor          |
| TACGTCCT db/m1 | db/m | 1532 | 0.011805 | FALSE | 1.339502 | FALSE | Endothelia Aterial EC  |
| TACGTCCT db/m1 | db/m | 326  | 0.055901 | FALSE | 1.984675 | FALSE | Photoreceptor          |
| TACTGCCT db/m1 | db/m | 3390 | 0.014997 | FALSE | 1.102626 | FALSE | Endothelia Capillary E |
| TACTTACA db/m1 | db/m | 832  | 0.022857 | FALSE | 1.426307 | FALSE | Photoreceptor          |
| TACTTACA db/m1 | db/m | 5709 | 0.029787 | FALSE | 0.982882 | FALSE | Endothelia Venous EC   |
| TACTTACC db/m1 | db/m | 7312 | 0.010614 | FALSE | 0.913737 | FALSE | Photoreceptor          |

|                |      |      |          |       |          |       |                        |
|----------------|------|------|----------|-------|----------|-------|------------------------|
| TACTTACG db/m1 | db/m | 1982 | 0.008438 | FALSE | 1.354971 | FALSE | Photoreceptor          |
| TACTTACT db/m1 | db/m | 5072 | 0.031973 | FALSE | 1.086327 | FALSE | Photoreceptor          |
| TACTTACT db/m1 | db/m | 814  | 0.060641 | FALSE | 2.702965 | FALSE | Muller cell            |
| TACTTCAC db/m1 | db/m | 913  | 0.115641 | TRUE  | 3.287071 | FALSE |                        |
| TACTTCAT db/m1 | db/m | 3045 | 0.020536 | FALSE | 0.778818 | FALSE | Photoreceptor          |
| TACTTGTA db/m1 | db/m | 6322 | 0.035586 | FALSE | 0.453789 | FALSE | Photoreceptor          |
| TACTTGTA db/m1 | db/m | 2450 | 0.028251 | FALSE | 1.909386 | FALSE | Neuron                 |
| TACTTGTA db/m1 | db/m | 6251 | 0.031973 | FALSE | 0.932533 | FALSE | Photoreceptor          |
| TACTTGTC db/m1 | db/m | 1016 | 0.047807 | FALSE | 1.724423 | FALSE | Photoreceptor          |
| TACTTGTG db/m1 | db/m | 1882 | 0.075259 | FALSE | 0.994309 | FALSE | Neuron                 |
| TACTTGTT db/m1 | db/m | 8089 | 0.073582 | FALSE | 0.707796 | FALSE | Photoreceptor          |
| TACTTGTT db/m1 | db/m | 390  | 0.13452  | TRUE  | 20.96506 | TRUE  |                        |
| TAGACCA db/m1  | db/m | 995  | 0.357022 | TRUE  | 4.396985 | FALSE |                        |
| TAGACCAT db/m1 | db/m | 1271 | 0.009277 | FALSE | 1.534714 | FALSE | Endothelia Capillary E |
| TAGACTGA db/m1 | db/m | 5452 | 0.059406 | FALSE | 1.28857  | FALSE | Photoreceptor          |
| TAGACTGC db/m1 | db/m | 7991 | 0.012814 | FALSE | 0.70069  | FALSE | Photoreceptor          |
| TAGACTGT db/m1 | db/m | 752  | 0.013338 | FALSE | 2.61278  | FALSE | Endothelia Capillary E |
| TAGACTGT db/m1 | db/m | 6315 | 0.012052 | FALSE | 1.100896 | FALSE | Photoreceptor          |
| TAGACTGT db/m1 | db/m | 398  | 0.020171 | FALSE | 3.248722 | FALSE | Muller cell            |
| TAGACTGT db/m1 | db/m | 470  | 0.228861 | TRUE  | 36.72131 | TRUE  |                        |
| TAGAGTC db/m1  | db/m | 4761 | 0.011081 | FALSE | 1.070778 | FALSE | Photoreceptor          |
| TAGAGTCC db/m1 | db/m | 1729 | 0.037564 | FALSE | 0.656807 | FALSE | Photoreceptor          |
| TAGATCG db/m1  | db/m | 4476 | 0.046025 | FALSE | 1.347353 | FALSE | Neuron                 |
| TAGATCG db/m1  | db/m | 478  | 0.095727 | FALSE | 3.592746 | FALSE | Endothelia Capillary E |
| TAGATCG db/m1  | db/m | 887  | 0.064568 | FALSE | 0.639141 | FALSE | Photoreceptor          |
| TAGATCG db/m1  | db/m | 922  | 0.071958 | FALSE | 2.111191 | FALSE | Photoreceptor          |
| TAGATCG db/m1  | db/m | 787  | 0.098234 | FALSE | 1.345885 | FALSE | Photoreceptor          |
| TAGATCG db/m1  | db/m | 5888 | 0.035586 | FALSE | 1.032477 | FALSE | Photoreceptor          |
| TAGATCG db/m1  | db/m | 1461 | 0.006683 | FALSE | 1.367521 | FALSE | Endothelia Capillary E |
| TAGATCGT db/m1 | db/m | 551  | 0.411992 | TRUE  | 6.203474 | TRUE  |                        |
| TAGCACA db/m1  | db/m | 2514 | 0.017758 | FALSE | 1.396621 | FALSE | Endothelia Capillary E |
| TAGCACA db/m1  | db/m | 6549 | 0.007058 | FALSE | 0.916306 | FALSE | Photoreceptor          |
| TAGCACAC db/m1 | db/m | 358  | 0.073582 | FALSE | 7.293666 | TRUE  |                        |
| TAGCACAC db/m1 | db/m | 2635 | 0.022059 | FALSE | 1.391884 | FALSE | Endothelia Capillary E |
| TAGCACAT db/m1 | db/m | 770  | 0.010157 | FALSE | 2.28759  | FALSE | Endothelia Capillary E |
| TAGGAGG db/m1  | db/m | 1734 | 0.046906 | FALSE | 1.613509 | FALSE | Pericyte               |
| TAGGAGG db/m1  | db/m | 490  | 0.059406 | FALSE | 7.526882 | TRUE  |                        |
| TAGGAGG db/m1  | db/m | 997  | 0.022857 | FALSE | 1.849978 | FALSE | Endothelia Aterial EC  |
| TAGGAGG db/m1  | db/m | 394  | 0.164835 | TRUE  | 12.95337 | TRUE  |                        |
| TAGGAGG db/m1  | db/m | 745  | 0.070386 | FALSE | 2.528913 | FALSE | Photoreceptor          |
| TAGGAGG db/m1  | db/m | 3071 | 0.098234 | FALSE | 15.1826  | TRUE  |                        |
| TAGGAGG db/m1  | db/m | 3321 | 0.075259 | FALSE | 1.384946 | FALSE | Neuron                 |
| TAGGGTT db/m1  | db/m | 5395 | 0.059406 | FALSE | 1.29367  | FALSE | Neuron                 |
| TAGGGTT db/m1  | db/m | 3208 | 0.012557 | FALSE | 1.189849 | FALSE | Endothelia Venous EC   |
| TAGGGTT db/m1  | db/m | 521  | 0.021286 | FALSE | 1.737557 | FALSE | Photoreceptor          |
| TAGGGTT db/m1  | db/m | 662  | 0.109375 | TRUE  | 17.38367 | TRUE  |                        |
| TAGGGTT db/m1  | db/m | 5332 | 0.148377 | TRUE  | 1.936722 | FALSE |                        |

|                 |      |      |          |       |          |       |                       |
|-----------------|------|------|----------|-------|----------|-------|-----------------------|
| TAGGTAC/ db/m1  | db/m | 3443 | 0.037564 | FALSE | 0.956268 | FALSE | Photoreceptor         |
| TAGGTAC/ db/m1  | db/m | 4093 | 0.075259 | FALSE | 1.453602 | FALSE | Photoreceptor         |
| TAGGTAC/ db/m1  | db/m | 4396 | 0.036891 | FALSE | 0.846983 | FALSE | Photoreceptor         |
| TAGGTAC/ db/m1  | db/m | 1797 | 0.054795 | FALSE | 1.296665 | FALSE | Endothelia Venous EC  |
| TAGGTAC/ db/m1  | db/m | 1022 | 0.012814 | FALSE | 0.721164 | FALSE | Photoreceptor         |
| TAGGTACC db/m1  | db/m | 1393 | 0.098234 | FALSE | 11.86369 | TRUE  |                       |
| TAGGTACC db/m1  | db/m | 2985 | 0.010614 | FALSE | 1.551507 | FALSE | Photoreceptor         |
| TAGGTACC db/m1  | db/m | 1109 | 0.032546 | FALSE | 0.581674 | FALSE | Photoreceptor         |
| TAGGTACT db/m1  | db/m | 7361 | 0.028251 | FALSE | 0.800765 | FALSE | Photoreceptor         |
| TAGGTTG/ db/m1  | db/m | 768  | 0.058205 | FALSE | 2.971252 | FALSE | Endothelia Aterial EC |
| TAGGTTG/ db/m1  | db/m | 5460 | 0.022059 | FALSE | 1.080955 | FALSE | Photoreceptor         |
| TAGGTTG/ db/m1  | db/m | 983  | 0.025416 | FALSE | 1.886204 | FALSE | Photoreceptor         |
| TAGTGCA/ db/m1  | db/m | 734  | 0.030859 | FALSE | 1.9536   | FALSE | Endothelia Aterial EC |
| TAGTGCA/ db/m1  | db/m | 403  | 0.025868 | FALSE | 2.031128 | FALSE | Photoreceptor         |
| TAGTGCA/ db/m1  | db/m | 805  | 0.024971 | FALSE | 1.778312 | FALSE | Endothelia Venous EC  |
| TAGTGCA/ db/m1  | db/m | 2781 | 0.016799 | FALSE | 1.454919 | FALSE | Endothelia Venous EC  |
| TAGTGCA/ db/m1  | db/m | 788  | 0.078788 | FALSE | 7.03125  | TRUE  |                       |
| TAGTGCA/ db/m1  | db/m | 2261 | 0.060641 | FALSE | 1.946882 | FALSE | Photoreceptor         |
| TAGTGCA/ db/m1  | db/m | 3426 | 0.041154 | FALSE | 1.229343 | FALSE | Endothelia Venous EC  |
| TAGTGCA/ db/m1  | db/m | 4304 | 0.034334 | FALSE | 1.02066  | FALSE | Photoreceptor         |
| TAGTGCA/ db/m1  | db/m | 728  | 0.024534 | FALSE | 1.227516 | FALSE | Photoreceptor         |
| TAGTGCA/ db/m1  | db/m | 1338 | 0.047807 | FALSE | 1.902705 | FALSE | Photoreceptor         |
| TAGTGCA/ db/m1  | db/m | 1319 | 0.018422 | FALSE | 1.347397 | FALSE | Photoreceptor         |
| TAGTGCA/ db/m1  | db/m | 987  | 0.034334 | FALSE | 1.322588 | FALSE | Photoreceptor         |
| TATACCTA db/m1  | db/m | 1696 | 0.130259 | TRUE  | 4.36828  | FALSE |                       |
| TATACCTA db/m1  | db/m | 691  | 0.071958 | FALSE | 2.20355  | FALSE | Photoreceptor         |
| TATACCTC db/m1  | db/m | 600  | 0.015581 | FALSE | 3.482326 | FALSE | Muller cell           |
| TATACCTG db/m1  | db/m | 7802 | 0.043505 | FALSE | 0.993656 | FALSE | Photoreceptor         |
| TATACCTG db/m1  | db/m | 1542 | 0.045165 | FALSE | 1.704716 | FALSE | Photoreceptor         |
| TATACCTG db/m1  | db/m | 1791 | 0.024534 | FALSE | 0.70671  | FALSE | Photoreceptor         |
| TATACCT/ db/m1  | db/m | 8651 | 0.021286 | FALSE | 0.593847 | FALSE | Photoreceptor         |
| TATACCT/ db/m1  | db/m | 586  | 0.093319 | FALSE | 4.621275 | FALSE | Muller cell           |
| TATATCCA db/m1  | db/m | 7048 | 0.023266 | FALSE | 0.70085  | FALSE | Photoreceptor         |
| TATATCCC db/m1  | db/m | 2996 | 0.034334 | FALSE | 1.376516 | FALSE | Photoreceptor         |
| TATATCCC db/m1  | db/m | 7203 | 0.042704 | FALSE | 1.052718 | FALSE | Photoreceptor         |
| TATATCCG db/m1  | db/m | 5626 | 0.041154 | FALSE | 0.795743 | FALSE | Photoreceptor         |
| TATATCCT/ db/m1 | db/m | 794  | 0.055901 | FALSE | 2.363233 | FALSE | Photoreceptor         |
| TATCAGG/ db/m1  | db/m | 2902 | 0.046906 | FALSE | 1.077153 | FALSE | Photoreceptor         |
| TATCAGG/ db/m1  | db/m | 1481 | 0.143501 | TRUE  | 5.887372 | TRUE  |                       |
| TATCAGG/ db/m1  | db/m | 1078 | 0.053718 | FALSE | 1.579985 | FALSE | Photoreceptor         |
| TATCAGG/ db/m1  | db/m | 2706 | 0.063221 | FALSE | 8.855912 | TRUE  |                       |
| TATCAGG/ db/m1  | db/m | 1495 | 0.04192  | FALSE | 1.269487 | FALSE | Photoreceptor         |
| TATCAGG/ db/m1  | db/m | 4295 | 0.065957 | FALSE | 1.493202 | FALSE | Photoreceptor         |
| TATCCTAC db/m1  | db/m | 876  | 0.016181 | FALSE | 0.963789 | FALSE | Photoreceptor         |
| TATCCTAC db/m1  | db/m | 1472 | 0.036891 | FALSE | 1.474812 | FALSE | Muller cell           |
| TATCCTAG db/m1  | db/m | 5511 | 0.018422 | FALSE | 1.039957 | FALSE | Photoreceptor         |
| TATCCTAT/ db/m1 | db/m | 1092 | 0.038953 | FALSE | 2.195636 | FALSE | Muller cell           |

|                |      |      |          |       |          |       |                        |
|----------------|------|------|----------|-------|----------|-------|------------------------|
| TATCGCCA db/m1 | db/m | 399  | 0.084562 | FALSE | 3.25764  | FALSE | Endothelia Capillary E |
| TATCGCCA db/m1 | db/m | 5303 | 0.012814 | FALSE | 1.162168 | FALSE | Photoreceptor          |
| TATCGCCC db/m1 | db/m | 4825 | 0.048732 | FALSE | 1.135842 | FALSE | Photoreceptor          |
| TATCGCCC db/m1 | db/m | 258  | 0.026328 | FALSE | 65.09161 | TRUE  |                        |
| TATCGCCC db/m1 | db/m | 749  | 0.021286 | FALSE | 0.974186 | FALSE | Photoreceptor          |
| TATCGCCC db/m1 | db/m | 2624 | 0.031973 | FALSE | 0.954414 | FALSE | Photoreceptor          |
| TATCGCCC db/m1 | db/m | 852  | 0.046906 | FALSE | 0.768478 | FALSE | Photoreceptor          |
| TATCGCCT db/m1 | db/m | 445  | 0.043505 | FALSE | 57.77351 | TRUE  |                        |
| TATCGCCT db/m1 | db/m | 3596 | 0.05065  | FALSE | 1.18878  | FALSE | Neuron                 |
| TATCGCCT db/m1 | db/m | 5126 | 0.027273 | FALSE | 0.827813 | FALSE | Photoreceptor          |
| TATCTGTA db/m1 | db/m | 514  | 0.084562 | FALSE | 15.16291 | TRUE  |                        |
| TATCTGTA db/m1 | db/m | 1252 | 0.009933 | FALSE | 1.425922 | FALSE | Endothelia Capillary E |
| TATCTGTC db/m1 | db/m | 4234 | 0.031411 | FALSE | 0.873179 | FALSE | Photoreceptor          |
| TATCTGTC db/m1 | db/m | 319  | 0.078788 | FALSE | 23.4589  | TRUE  |                        |
| TATCTGTC db/m1 | db/m | 6423 | 0.036891 | FALSE | 0.751611 | FALSE | Photoreceptor          |
| TATCTGTG db/m1 | db/m | 3367 | 0.034954 | FALSE | 1.432997 | FALSE | Neuron                 |
| TATCTTGA db/m1 | db/m | 4158 | 0.014429 | FALSE | 1.349302 | FALSE | Photoreceptor          |
| TATCTTGC db/m1 | db/m | 654  | 0.030859 | FALSE | 0.803297 | FALSE | Photoreceptor          |
| TATCTTGG db/m1 | db/m | 345  | 0.015581 | FALSE | 4.997509 | FALSE | Pericyte               |
| TATCTTGT db/m1 | db/m | 3312 | 0.034334 | FALSE | 1.198461 | FALSE | Neuron                 |
| TATGTTCA db/m1 | db/m | 449  | 0.030318 | FALSE | 4.049222 | FALSE | Photoreceptor          |
| TATGTTCA db/m1 | db/m | 629  | 0.01981  | FALSE | 1.36271  | FALSE | Photoreceptor          |
| TATGTTCA db/m1 | db/m | 3521 | 0.053718 | FALSE | 1.252112 | FALSE | Endothelia Venous EC   |
| TATGTTCA db/m1 | db/m | 487  | 0.095727 | FALSE | 2.870036 | FALSE | Photoreceptor          |
| TATGTTCA db/m1 | db/m | 568  | 0.05065  | FALSE | 3.888889 | FALSE | Muller cell            |
| TATGTTCA db/m1 | db/m | 1423 | 0.013074 | FALSE | 1.420097 | FALSE | Pericyte               |
| TATGTTCC db/m1 | db/m | 6553 | 0.009933 | FALSE | 0.883034 | FALSE | Photoreceptor          |
| TATGTTCC db/m1 | db/m | 7548 | 0.03313  | FALSE | 0.901719 | FALSE | Photoreceptor          |
| TATGTTCC db/m1 | db/m | 4165 | 0.003803 | FALSE | 1.016481 | FALSE | Neuron                 |
| TATGTTCT db/m1 | db/m | 2941 | 0.051646 | FALSE | 1.403791 | FALSE | Photoreceptor          |
| TATTCCAA db/m1 | db/m | 1826 | 0.04192  | FALSE | 1.907414 | FALSE | Photoreceptor          |
| TATTCCAC db/m1 | db/m | 5874 | 0.029787 | FALSE | 1.197024 | FALSE | Photoreceptor          |
| TATTCCAC db/m1 | db/m | 3111 | 0.011081 | FALSE | 1.614856 | FALSE | Photoreceptor          |
| TATTCCAG db/m1 | db/m | 3272 | 0.071958 | FALSE | 1.481401 | FALSE | Endothelia Venous EC   |
| TATTCCAT db/m1 | db/m | 1049 | 0.013876 | FALSE | 1.806903 | FALSE | Endothelia Capillary E |
| TATTCCAT db/m1 | db/m | 2246 | 0.033726 | FALSE | 1.707153 | FALSE | Endothelia Venous EC   |
| TATTCCAT db/m1 | db/m | 626  | 0.018422 | FALSE | 2.789842 | FALSE | Muller cell            |
| TATTCCAT db/m1 | db/m | 1940 | 0.095727 | FALSE | 0.764163 | FALSE | Endothelia Capillary E |
| TATTGCTC db/m1 | db/m | 4127 | 0.15354  | TRUE  | 3.108666 | FALSE |                        |
| TATTGCTC db/m1 | db/m | 1736 | 0.016181 | FALSE | 1.628254 | FALSE | Endothelia Capillary E |
| TATTGCTG db/m1 | db/m | 2133 | 0.034334 | FALSE | 1.943267 | FALSE | Photoreceptor          |
| TATTGGG db/m1  | db/m | 1457 | 0.013605 | FALSE | 1.825673 | FALSE | Endothelia Aterial EC  |
| TATTGGG db/m1  | db/m | 418  | 0.022455 | FALSE | 2.098568 | FALSE | Photoreceptor          |
| TATTGGG db/m1  | db/m | 5058 | 0.012303 | FALSE | 1.117845 | FALSE | Photoreceptor          |
| TATTGGG db/m1  | db/m | 3867 | 0.013876 | FALSE | 1.034064 | FALSE | Neuron                 |
| TATTGGG db/m1  | db/m | 8544 | 0.030859 | FALSE | 0.637742 | FALSE | Photoreceptor          |
| TATTGGG db/m1  | db/m | 2587 | 0.113205 | TRUE  | 4.627296 | FALSE |                        |



|                |      |      |          |       |          |       |                        |
|----------------|------|------|----------|-------|----------|-------|------------------------|
| TATTGGGT db/m1 | db/m | 3983 | 0.030859 | FALSE | 1.166233 | FALSE | Endothelia Capillary E |
| TATTTCGC db/m1 | db/m | 3733 | 0.043505 | FALSE | 1.385755 | FALSE | Photoreceptor          |
| TATTTCGG db/m1 | db/m | 1728 | 0.038953 | FALSE | 0.657801 | FALSE | Photoreceptor          |
| TATTTCGG db/m1 | db/m | 1974 | 0.016181 | FALSE | 1.509681 | FALSE | Endothelia Capillary E |
| TATTTCGG db/m1 | db/m | 653  | 0.112477 | TRUE  | 8.823529 | TRUE  |                        |
| TATTTCGT db/m1 | db/m | 618  | 0.037564 | FALSE | 3.425604 | FALSE | Photoreceptor          |
| TCAAGAC db/m1  | db/m | 2587 | 0.060641 | FALSE | 1.84718  | FALSE | Photoreceptor          |
| TCAAGAC db/m1  | db/m | 1482 | 0.093319 | FALSE | 25.02388 | TRUE  |                        |
| TCAAGAC db/m1  | db/m | 1444 | 0.032546 | FALSE | 0.701552 | FALSE | Photoreceptor          |
| TCAAGAC db/m1  | db/m | 4891 | 0.011805 | FALSE | 1.037098 | FALSE | Endothelia Capillary E |
| TCAAGACT db/m1 | db/m | 1208 | 0.010157 | FALSE | 1.838384 | FALSE | Endothelia Capillary E |
| TCAAGACT db/m1 | db/m | 781  | 0.038953 | FALSE | 49.60897 | TRUE  |                        |
| TCAAGACT db/m1 | db/m | 2016 | 0.024971 | FALSE | 1.218179 | FALSE | Endothelia Capillary E |
| TCAAGCA db/m1  | db/m | 344  | 0.084562 | FALSE | 4.437817 | FALSE | Photoreceptor          |
| TCAAGCA db/m1  | db/m | 8253 | 0.054795 | FALSE | 0.847405 | FALSE | Photoreceptor          |
| TCAAGCA db/m1  | db/m | 399  | 0.040404 | FALSE | 10.91549 | TRUE  |                        |
| TCAAGCA db/m1  | db/m | 608  | 0.045165 | FALSE | 1.75738  | FALSE | Photoreceptor          |
| TCAAGCA db/m1  | db/m | 3366 | 0.046025 | FALSE | 1.390221 | FALSE | Neuron                 |
| TCAAGCA db/m1  | db/m | 698  | 0.098234 | FALSE | 4.985043 | FALSE | Muller cell            |
| TCAAGCAT db/m1 | db/m | 2330 | 0.013605 | FALSE | 1.243508 | FALSE | Endothelia Capillary E |
| TCAAGTG db/m1  | db/m | 2575 | 0.045165 | FALSE | 1.459175 | FALSE | Neuron                 |
| TCAAGTG db/m1  | db/m | 2339 | 0.003959 | FALSE | 1.036357 | FALSE | Neuron                 |
| TCAAGTG db/m1  | db/m | 6608 | 0.014429 | FALSE | 1.151992 | FALSE | Photoreceptor          |
| TCAAGTG db/m1  | db/m | 4104 | 0.029787 | FALSE | 1.030799 | FALSE | Endothelia Venous EC   |
| TCAAGTG db/m1  | db/m | 3574 | 0.046025 | FALSE | 1.308103 | FALSE | Photoreceptor          |
| TCAAGTG db/m1  | db/m | 1433 | 0.078788 | FALSE | 1.565015 | FALSE | Photoreceptor          |
| TCAATCTA db/m1 | db/m | 2163 | 0.052669 | FALSE | 1.491289 | FALSE | Photoreceptor          |
| TCAATCTC db/m1 | db/m | 990  | 0.059406 | FALSE | 51.06012 | TRUE  |                        |
| TCAATCTC db/m1 | db/m | 5043 | 0.357022 | TRUE  | 4.121633 | FALSE |                        |
| TCAATCTC db/m1 | db/m | 3213 | 0.029266 | FALSE | 1.323816 | FALSE | Endothelia Capillary E |
| TCAATCTG db/m1 | db/m | 1288 | 0.012303 | FALSE | 1.497145 | FALSE | Photoreceptor          |
| TCAATCTT db/m1 | db/m | 6342 | 0.018761 | FALSE | 0.767836 | FALSE | Photoreceptor          |
| TCAATCTT db/m1 | db/m | 1525 | 0.023682 | FALSE | 1.405684 | FALSE | Pericyte               |
| TCAATTCA db/m1 | db/m | 2163 | 0.004762 | FALSE | 1.225885 | FALSE | Neuron                 |
| TCAATTCC db/m1 | db/m | 424  | 0.022455 | FALSE | 3.228419 | FALSE | Endothelia Capillary E |
| TCAATTCT db/m1 | db/m | 1023 | 0.026796 | FALSE | 0.907926 | FALSE | Photoreceptor          |
| TCAATTCT db/m1 | db/m | 914  | 0.014429 | FALSE | 0.981298 | FALSE | Photoreceptor          |
| TCAATTCT db/m1 | db/m | 975  | 0.026796 | FALSE | 1.699843 | FALSE | Photoreceptor          |
| TCACAAG db/m1  | db/m | 687  | 0.017758 | FALSE | 1.120045 | FALSE | Photoreceptor          |
| TCACAAG db/m1  | db/m | 6327 | 0.024971 | FALSE | 0.951064 | FALSE | Photoreceptor          |
| TCACAAG db/m1  | db/m | 1158 | 0.075259 | FALSE | 1.232341 | FALSE | Photoreceptor          |
| TCACAAG db/m1  | db/m | 5322 | 0.010384 | FALSE | 1.221704 | FALSE | Photoreceptor          |
| TCACAAG db/m1  | db/m | 1765 | 0.133788 | TRUE  | 2.581051 | FALSE |                        |
| TCACAAG db/m1  | db/m | 1563 | 0.060641 | FALSE | 19.07203 | TRUE  |                        |
| TCACAAGT db/m1 | db/m | 421  | 0.095727 | FALSE | 25.35411 | TRUE  |                        |
| TCACAAGT db/m1 | db/m | 4926 | 0.052669 | FALSE | 1.197081 | FALSE | Photoreceptor          |
| TCACAAGT db/m1 | db/m | 3345 | 0.020908 | FALSE | 1.039337 | FALSE | Endothelia Aterial EC  |

|                |      |      |          |       |          |       |                        |
|----------------|------|------|----------|-------|----------|-------|------------------------|
| TCACAAGT db/m1 | db/m | 772  | 0.018422 | FALSE | 1.107142 | FALSE | Endothelia Aterial EC  |
| TCACAAGT db/m1 | db/m | 863  | 0.051646 | FALSE | 0.919173 | FALSE | Photoreceptor          |
| TCACACCA db/m1 | db/m | 1267 | 0.023682 | FALSE | 0.731643 | FALSE | Photoreceptor          |
| TCACACCA db/m1 | db/m | 715  | 0.011081 | FALSE | 1.42727  | FALSE | Photoreceptor          |
| TCACACCC db/m1 | db/m | 5660 | 0.054795 | FALSE | 1.272436 | FALSE | Photoreceptor          |
| TCACACCC db/m1 | db/m | 3568 | 0.04192  | FALSE | 1.177389 | FALSE | Photoreceptor          |
| TCACACCC db/m1 | db/m | 391  | 0.098234 | FALSE | 10.7438  | TRUE  |                        |
| TCACACCC db/m1 | db/m | 2773 | 0.016181 | FALSE | 0.880158 | FALSE | Photoreceptor          |
| TCACACCG db/m1 | db/m | 2026 | 0.03313  | FALSE | 0.899239 | FALSE | Endothelia Capillary E |
| TCACACCG db/m1 | db/m | 1174 | 0.018422 | FALSE | 1.483281 | FALSE | Endothelia Capillary E |
| TCACATTA db/m1 | db/m | 972  | 0.039671 | FALSE | 1.411528 | FALSE | Photoreceptor          |
| TCACATTA db/m1 | db/m | 2967 | 0.061912 | FALSE | 0.869658 | FALSE | Photoreceptor          |
| TCACATTA db/m1 | db/m | 3919 | 0.022857 | FALSE | 1.16098  | FALSE | Endothelia Venous EC   |
| TCACATTC db/m1 | db/m | 778  | 0.03313  | FALSE | 3.640789 | FALSE | Pericyte               |
| TCACATTC db/m1 | db/m | 867  | 0.029787 | FALSE | 0.815709 | FALSE | Photoreceptor          |
| TCACATTG db/m1 | db/m | 7884 | 0.032546 | FALSE | 0.98039  | FALSE | Photoreceptor          |
| TCACATTT db/m1 | db/m | 1286 | 0.075259 | FALSE | 1.440039 | FALSE | Photoreceptor          |
| TCACATTT db/m1 | db/m | 6765 | 0.057037 | FALSE | 1.079937 | FALSE | Photoreceptor          |
| TCACATTT db/m1 | db/m | 3660 | 0.048732 | FALSE | 1.166375 | FALSE | Endothelia Venous EC   |
| TCACGCTA db/m1 | db/m | 5173 | 0.058205 | FALSE | 1.019252 | FALSE | Photoreceptor          |
| TCACGCTA db/m1 | db/m | 1086 | 0.03313  | FALSE | 1.980373 | FALSE | Muller cell            |
| TCACGCTC db/m1 | db/m | 1454 | 0.046906 | FALSE | 1.096682 | FALSE | Photoreceptor          |
| TCACGCTC db/m1 | db/m | 714  | 0.034334 | FALSE | 2.529243 | FALSE | Endothelia Capillary E |
| TCACGGG db/m1  | db/m | 6562 | 0.357022 | TRUE  | 3.54021  | FALSE |                        |
| TCACGGG db/m1  | db/m | 6041 | 0.022455 | FALSE | 1.073215 | FALSE | Photoreceptor          |
| TCACGGG db/m1  | db/m | 8576 | 0.023266 | FALSE | 0.912854 | FALSE | Photoreceptor          |
| TCACTATA db/m1 | db/m | 3759 | 0.048732 | FALSE | 1.188825 | FALSE | Endothelia Venous EC   |
| TCACTATA db/m1 | db/m | 2654 | 0.031411 | FALSE | 1.766506 | FALSE | Neuron                 |
| TCACTATC db/m1 | db/m | 1030 | 0.091004 | FALSE | 0.810288 | FALSE | Photoreceptor          |
| TCACTATC db/m1 | db/m | 1475 | 0.007058 | FALSE | 1.809817 | FALSE | Endothelia Capillary E |
| TCACTATC db/m1 | db/m | 2287 | 0.008644 | FALSE | 1.337961 | FALSE | Neuron                 |
| TCACTATG db/m1 | db/m | 912  | 0.209157 | TRUE  | 27.79661 | TRUE  |                        |
| TCACTATG db/m1 | db/m | 6506 | 0.020171 | FALSE | 0.553599 | FALSE | Photoreceptor          |
| TCACTATT db/m1 | db/m | 3103 | 0.027273 | FALSE | 1.156016 | FALSE | Pericyte               |
| TCACTATT db/m1 | db/m | 3290 | 0.031411 | FALSE | 1.312452 | FALSE | Endothelia Capillary E |
| TCACTATT db/m1 | db/m | 1562 | 0.022059 | FALSE | 1.409472 | FALSE | Pericyte               |
| TCACTCGA db/m1 | db/m | 1183 | 0.065957 | FALSE | 25.78926 | TRUE  |                        |
| TCACTCGA db/m1 | db/m | 5844 | 0.013338 | FALSE | 0.975221 | FALSE | Photoreceptor          |
| TCACTCGA db/m1 | db/m | 589  | 0.041154 | FALSE | 3.419198 | FALSE | Muller cell            |
| TCACTCGA db/m1 | db/m | 1212 | 0.049679 | FALSE | 1.83953  | FALSE | Photoreceptor          |
| TCACTCGC db/m1 | db/m | 2411 | 0.070386 | FALSE | 1.448755 | FALSE | Photoreceptor          |
| TCACTCGC db/m1 | db/m | 570  | 0.093319 | FALSE | 3.034596 | FALSE | Muller cell            |
| TCACTCGC db/m1 | db/m | 1745 | 0.022059 | FALSE | 1.284316 | FALSE | Endothelia Capillary E |
| TCACTCGC db/m1 | db/m | 1401 | 0.027758 | FALSE | 1.440107 | FALSE | Photoreceptor          |
| TCACTCGC db/m1 | db/m | 3903 | 0.043505 | FALSE | 0.750988 | FALSE | Photoreceptor          |
| TCACTCGC db/m1 | db/m | 824  | 0.073582 | FALSE | 3.96119  | FALSE | Muller cell            |
| TCACTCGC db/m1 | db/m | 1365 | 0.03313  | FALSE | 0.797606 | FALSE | Photoreceptor          |

|                |      |      |          |       |          |       |                        |
|----------------|------|------|----------|-------|----------|-------|------------------------|
| TCAGCAA db/m1  | db/m | 1087 | 0.036891 | FALSE | 0.850776 | FALSE | Photoreceptor          |
| TCAGCAAC db/m1 | db/m | 4701 | 0.035586 | FALSE | 1.102585 | FALSE | Endothelia Venous EC   |
| TCAGCAAC db/m1 | db/m | 2248 | 0.044326 | FALSE | 1.37857  | FALSE | Photoreceptor          |
| TCAGCAAC db/m1 | db/m | 1081 | 0.024534 | FALSE | 1.129541 | FALSE | Photoreceptor          |
| TCAGCAAC db/m1 | db/m | 1051 | 0.022059 | FALSE | 0.978153 | FALSE | Photoreceptor          |
| TCAGCAAC db/m1 | db/m | 3082 | 0.047807 | FALSE | 1.331542 | FALSE | Photoreceptor          |
| TCAGCAAC db/m1 | db/m | 519  | 0.037564 | FALSE | 3.929975 | FALSE | Muller cell            |
| TCAGCCTA db/m1 | db/m | 2337 | 0.041154 | FALSE | 1.55103  | FALSE | Photoreceptor          |
| TCAGCCTC db/m1 | db/m | 2720 | 0.012814 | FALSE | 1.370101 | FALSE | Endothelia Venous EC   |
| TCAGCCTT db/m1 | db/m | 830  | 0.034954 | FALSE | 4.396226 | FALSE | Muller cell            |
| TCAGGGC db/m1  | db/m | 1214 | 0.070386 | FALSE | 2.26409  | FALSE | Muller cell            |
| TCAGGGC db/m1  | db/m | 6326 | 0.08663  | FALSE | 0.951511 | FALSE | Neuron                 |
| TCAGGGC db/m1  | db/m | 8749 | 0.013876 | FALSE | 0.837208 | FALSE | Photoreceptor          |
| TCAGGGC db/m1  | db/m | 1007 | 0.046906 | FALSE | 2.028839 | FALSE | Neuron                 |
| TCAGGGC db/m1  | db/m | 855  | 0.080645 | FALSE | 2.353476 | FALSE | Photoreceptor          |
| TCAGGGC db/m1  | db/m | 5522 | 0.011319 | FALSE | 0.959079 | FALSE | Photoreceptor          |
| TCAGGGC db/m1  | db/m | 8246 | 0.357022 | TRUE  | 1.66375  | FALSE |                        |
| TCAGGGC db/m1  | db/m | 1965 | 0.052669 | FALSE | 1.800595 | FALSE | Photoreceptor          |
| TCAGGTA db/m1  | db/m | 760  | 0.015581 | FALSE | 1.801224 | FALSE | Endothelia Capillary E |
| TCAGGTA db/m1  | db/m | 4297 | 0.070386 | FALSE | 1.169529 | FALSE | Photoreceptor          |
| TCAGGTAC db/m1 | db/m | 586  | 0.040404 | FALSE | 52.52823 | TRUE  |                        |
| TCAGGTAC db/m1 | db/m | 3737 | 0.019106 | FALSE | 1.048948 | FALSE | Endothelia Venous EC   |
| TCAGGTAC db/m1 | db/m | 2458 | 0.036232 | FALSE | 1.239906 | FALSE | Photoreceptor          |
| TCAGGTAC db/m1 | db/m | 5014 | 0.013605 | FALSE | 1.131954 | FALSE | Photoreceptor          |
| TCAGGTAC db/m1 | db/m | 2463 | 0.022857 | FALSE | 1.477358 | FALSE | Endothelia Capillary E |
| TCAGGTAC db/m1 | db/m | 750  | 0.024105 | FALSE | 0.460963 | FALSE | Photoreceptor          |
| TCAGGTAT db/m1 | db/m | 1985 | 0.051646 | FALSE | 2.747306 | FALSE | Muller cell            |
| TCAGGTAT db/m1 | db/m | 931  | 0.022857 | FALSE | 0.489841 | FALSE | Photoreceptor          |
| TCAGGTAT db/m1 | db/m | 761  | 0.098234 | FALSE | 2.223356 | FALSE | Endothelia Capillary E |
| TCAGGTAT db/m1 | db/m | 4612 | 0.012303 | FALSE | 1.171098 | FALSE | Photoreceptor          |
| TCAGTCCA db/m1 | db/m | 3762 | 0.058205 | FALSE | 1.209596 | FALSE | Photoreceptor          |
| TCAGTCCA db/m1 | db/m | 3523 | 0.025416 | FALSE | 1.162095 | FALSE | Photoreceptor          |
| TCAGTCCC db/m1 | db/m | 866  | 0.031411 | FALSE | 2.048947 | FALSE | Muller cell            |
| TCAGTCCC db/m1 | db/m | 1293 | 0.065957 | FALSE | 2.889466 | FALSE | Muller cell            |
| TCAGTCCT db/m1 | db/m | 578  | 0.015581 | FALSE | 4.112461 | FALSE | Muller cell            |
| TCAGTCCT db/m1 | db/m | 2895 | 0.027758 | FALSE | 0.549448 | FALSE | Photoreceptor          |
| TCAGTGAC db/m1 | db/m | 1195 | 0.103567 | TRUE  | 23.6798  | TRUE  |                        |
| TCAGTGAC db/m1 | db/m | 1634 | 0.028251 | FALSE | 0.917513 | FALSE | Photoreceptor          |
| TCAGTGAC db/m1 | db/m | 1829 | 0.029787 | FALSE | 0.900372 | FALSE | Photoreceptor          |
| TCAGTGAT db/m1 | db/m | 5967 | 0.020908 | FALSE | 0.954535 | FALSE | Photoreceptor          |
| TCAGTGAT db/m1 | db/m | 6288 | 0.013338 | FALSE | 0.89099  | FALSE | Photoreceptor          |
| TCAGTTTA db/m1 | db/m | 398  | 0.084562 | FALSE | 3.488124 | FALSE | Photoreceptor          |
| TCAGTTTA db/m1 | db/m | 2531 | 0.024971 | FALSE | 1.219087 | FALSE | Endothelia Capillary E |
| TCAGTTTG db/m1 | db/m | 1439 | 0.017434 | FALSE | 1.242024 | FALSE | Endothelia Capillary E |
| TCAGTTTG db/m1 | db/m | 488  | 0.073582 | FALSE | 20.4461  | TRUE  |                        |
| TCAGTTTG db/m1 | db/m | 704  | 0.023682 | FALSE | 0.508418 | FALSE | Photoreceptor          |
| TCATACTC db/m1 | db/m | 1202 | 0.011081 | FALSE | 1.768745 | FALSE | Endothelia Capillary E |

|                |      |      |          |       |          |       |                        |
|----------------|------|------|----------|-------|----------|-------|------------------------|
| TCATACTC db/m1 | db/m | 5653 | 0.04192  | FALSE | 1.248828 | FALSE | Photoreceptor          |
| TCATACTC db/m1 | db/m | 1057 | 0.046025 | FALSE | 0.960177 | FALSE | Photoreceptor          |
| TCATACTT db/m1 | db/m | 4157 | 0.055901 | FALSE | 0.85986  | FALSE | Photoreceptor          |
| TCATACTT db/m1 | db/m | 2987 | 0.029787 | FALSE | 1.095772 | FALSE | Endothelia Capillary E |
| TCATATCA db/m1 | db/m | 1272 | 0.009933 | FALSE | 1.489106 | FALSE | Pericyte               |
| TCATATCC db/m1 | db/m | 602  | 0.03313  | FALSE | 1.960738 | FALSE | Photoreceptor          |
| TCATATCC db/m1 | db/m | 1819 | 0.05065  | FALSE | 2.387109 | FALSE | Photoreceptor          |
| TCATATCC db/m1 | db/m | 874  | 0.067388 | FALSE | 1.463078 | FALSE | Photoreceptor          |
| TCATATCG db/m1 | db/m | 513  | 0.032546 | FALSE | 1.717075 | FALSE | Photoreceptor          |
| TCATATCT db/m1 | db/m | 1097 | 0.015287 | FALSE | 2.352263 | FALSE | Pericyte               |
| TCATATCT db/m1 | db/m | 6570 | 0.067388 | FALSE | 1.143086 | FALSE | Endothelia Venous EC   |
| TCATCATA db/m1 | db/m | 2276 | 0.035586 | FALSE | 1.059023 | FALSE | Photoreceptor          |
| TCATCATA db/m1 | db/m | 500  | 0.038251 | FALSE | 0.963111 | FALSE | Photoreceptor          |
| TCATCATA db/m1 | db/m | 639  | 0.071958 | FALSE | 1.421409 | FALSE | Photoreceptor          |
| TCATCATC db/m1 | db/m | 4901 | 0.153234 | TRUE  | 3.318211 | FALSE |                        |
| TCATCATC db/m1 | db/m | 1639 | 0.044326 | FALSE | 1.401268 | FALSE | Photoreceptor          |
| TCATCATC db/m1 | db/m | 3281 | 0.04192  | FALSE | 1.50498  | FALSE | Photoreceptor          |
| TCATCATC db/m1 | db/m | 2207 | 0.003497 | FALSE | 1.270455 | FALSE | Neuron                 |
| TCATCATC db/m1 | db/m | 2270 | 0.006137 | FALSE | 1.5815   | FALSE | Neuron                 |
| TCATCATG db/m1 | db/m | 6259 | 0.043505 | FALSE | 0.874664 | FALSE | Endothelia Venous EC   |
| TCATCATG db/m1 | db/m | 455  | 0.013876 | FALSE | 3.328831 | FALSE | Photoreceptor          |
| TCATCATT db/m1 | db/m | 593  | 0.05065  | FALSE | 5.561862 | TRUE  |                        |
| TCATCCGC db/m1 | db/m | 3463 | 0.015879 | FALSE | 1.131344 | FALSE | Photoreceptor          |
| TCATCCGC db/m1 | db/m | 1221 | 0.026796 | FALSE | 3.734696 | FALSE | Muller cell            |
| TCATCCGC db/m1 | db/m | 460  | 0.159016 | TRUE  | 9.473684 | TRUE  |                        |
| TCATCCGC db/m1 | db/m | 4881 | 0.023682 | FALSE | 1.177814 | FALSE | Photoreceptor          |
| TCATCCGT db/m1 | db/m | 537  | 0.095727 | FALSE | 2.877721 | FALSE | Photoreceptor          |
| TCATCCGT db/m1 | db/m | 1998 | 0.051646 | FALSE | 2.760517 | FALSE | Muller cell            |
| TCATGAG db/m1  | db/m | 536  | 0.03313  | FALSE | 2.548241 | FALSE | Photoreceptor          |
| TCATGAG db/m1  | db/m | 7849 | 0.018761 | FALSE | 0.629115 | FALSE | Photoreceptor          |
| TCATGAG db/m1  | db/m | 5691 | 0.588076 | TRUE  | 7.297183 | TRUE  |                        |
| TCATGAG db/m1  | db/m | 442  | 0.039671 | FALSE | 42.67942 | TRUE  |                        |
| TCATGAG db/m1  | db/m | 2016 | 0.003196 | FALSE | 1.15105  | FALSE | Neuron                 |
| TCATGAG db/m1  | db/m | 4895 | 0.028754 | FALSE | 1.187935 | FALSE | Photoreceptor          |
| TCATGAG db/m1  | db/m | 2687 | 0.018761 | FALSE | 1.303024 | FALSE | Endothelia Capillary E |
| TCATGAG db/m1  | db/m | 1627 | 0.028754 | FALSE | 1.458818 | FALSE | Endothelia Capillary E |
| TCATGCCG db/m1 | db/m | 1576 | 0.040404 | FALSE | 1.357168 | FALSE | Photoreceptor          |
| TCATGCCG db/m1 | db/m | 6707 | 0.018761 | FALSE | 1.043284 | FALSE | Photoreceptor          |
| TCATGCCT db/m1 | db/m | 7419 | 0.046025 | FALSE | 0.835063 | FALSE | Photoreceptor          |
| TCATGCCT db/m1 | db/m | 1140 | 0.036891 | FALSE | 48.55427 | TRUE  |                        |
| TCATGCCT db/m1 | db/m | 334  | 0.068864 | FALSE | 4.253    | FALSE | Pericyte               |
| TCATGCCT db/m1 | db/m | 1778 | 0.061912 | FALSE | 27.13704 | TRUE  |                        |
| TCATGGA db/m1  | db/m | 2827 | 0.021286 | FALSE | 1.179088 | FALSE | Endothelia Capillary E |
| TCATGGA db/m1  | db/m | 3102 | 0.011805 | FALSE | 1.068831 | FALSE | Endothelia Venous EC   |
| TCATGGA db/m1  | db/m | 1222 | 0.018088 | FALSE | 1.994494 | FALSE | Photoreceptor          |
| TCATGGA db/m1  | db/m | 7874 | 0.027758 | FALSE | 0.832171 | FALSE | Photoreceptor          |
| TCATGGA db/m1  | db/m | 356  | 0.070386 | FALSE | 30.73463 | TRUE  |                        |

|                |      |      |          |       |          |       |                        |
|----------------|------|------|----------|-------|----------|-------|------------------------|
| TCATGGAC db/m1 | db/m | 959  | 0.031973 | FALSE | 54.3921  | TRUE  |                        |
| TCATGGAC db/m1 | db/m | 2705 | 0.037564 | FALSE | 0.74713  | FALSE | Photoreceptor          |
| TCATGGAT db/m1 | db/m | 4861 | 0.093319 | FALSE | 1.192994 | FALSE | Photoreceptor          |
| TCATGTTG db/m1 | db/m | 6592 | 0.020171 | FALSE | 0.831251 | FALSE | Photoreceptor          |
| TCATGTTG db/m1 | db/m | 937  | 0.023266 | FALSE | 2.477829 | FALSE | Photoreceptor          |
| TCATGTTG db/m1 | db/m | 610  | 0.061912 | FALSE | 44.31058 | TRUE  |                        |
| TCATGTTG db/m1 | db/m | 1154 | 0.046025 | FALSE | 1.227788 | FALSE | Photoreceptor          |
| TCATGTTG db/m1 | db/m | 4843 | 0.112477 | TRUE  | 3.176553 | FALSE |                        |
| TCATGTTG db/m1 | db/m | 658  | 0.030859 | FALSE | 0.807678 | FALSE | Photoreceptor          |
| TCATGTTT db/m1 | db/m | 3426 | 0.014711 | FALSE | 1.389927 | FALSE | Photoreceptor          |
| TCATTACA db/m1 | db/m | 1697 | 0.018761 | FALSE | 0.756251 | FALSE | Photoreceptor          |
| TCATTACA db/m1 | db/m | 1245 | 0.049679 | FALSE | 0.621882 | FALSE | Photoreceptor          |
| TCATTACC db/m1 | db/m | 8075 | 0.013605 | FALSE | 0.922259 | FALSE | Photoreceptor          |
| TCATTACG db/m1 | db/m | 487  | 0.109375 | TRUE  | 10.0141  | TRUE  |                        |
| TCATTCAA db/m1 | db/m | 671  | 0.051646 | FALSE | 46.00485 | TRUE  |                        |
| TCATTCAA db/m1 | db/m | 662  | 0.075259 | FALSE | 2.218712 | FALSE | Photoreceptor          |
| TCATTCAA db/m1 | db/m | 2564 | 0.048732 | FALSE | 0.664313 | FALSE | Photoreceptor          |
| TCATTCAA db/m1 | db/m | 5393 | 0.016181 | FALSE | 1.07857  | FALSE | Photoreceptor          |
| TCATTCAg db/m1 | db/m | 1198 | 0.010384 | FALSE | 0.869541 | FALSE | Photoreceptor          |
| TCATTCAg db/m1 | db/m | 2210 | 0.027273 | FALSE | 1.152903 | FALSE | Endothelia Capillary E |
| TCATTCAg db/m1 | db/m | 580  | 0.060641 | FALSE | 14.93868 | TRUE  |                        |
| TCATTCAI db/m1 | db/m | 1819 | 0.052669 | FALSE | 0.615332 | FALSE | Photoreceptor          |
| TCATTGTA db/m1 | db/m | 2256 | 0.05065  | FALSE | 1.723185 | FALSE | Photoreceptor          |
| TCATTGTA db/m1 | db/m | 996  | 0.011319 | FALSE | 1.91204  | FALSE | Endothelia Capillary E |
| TCATTGTC db/m1 | db/m | 1617 | 0.061912 | FALSE | 1.30626  | FALSE | Photoreceptor          |
| TCATTGTC db/m1 | db/m | 2096 | 0.055901 | FALSE | 1.463181 | FALSE | Endothelia Venous EC   |
| TCATTGTG db/m1 | db/m | 5482 | 0.070386 | FALSE | 0.966955 | FALSE | Photoreceptor          |
| TCATTGTG db/m1 | db/m | 760  | 0.037564 | FALSE | 3.210688 | FALSE | Endothelia Capillary E |
| TCATTTGA db/m1 | db/m | 2415 | 0.01981  | FALSE | 1.005929 | FALSE | Photoreceptor          |
| TCATTTGC db/m1 | db/m | 1117 | 0.063221 | FALSE | 1.578968 | FALSE | Photoreceptor          |
| TCATTTGC db/m1 | db/m | 7577 | 0.025868 | FALSE | 0.778878 | FALSE | Photoreceptor          |
| TCATTTGG db/m1 | db/m | 1758 | 0.051646 | FALSE | 3.511393 | FALSE | Muller cell            |
| TCATTTGT db/m1 | db/m | 802  | 0.018088 | FALSE | 2.231508 | FALSE | Endothelia Capillary E |
| TCCACCAA db/m1 | db/m | 3925 | 0.022857 | FALSE | 1.376598 | FALSE | Neuron                 |
| TCCACCAA db/m1 | db/m | 481  | 0.011561 | FALSE | 2.320614 | FALSE | Photoreceptor          |
| TCCACCAA db/m1 | db/m | 974  | 0.048732 | FALSE | 1.523664 | FALSE | Photoreceptor          |
| TCCACCAT db/m1 | db/m | 3609 | 0.05065  | FALSE | 1.390955 | FALSE | Photoreceptor          |
| TCCACCAT db/m1 | db/m | 2519 | 0.045165 | FALSE | 0.932152 | FALSE | Photoreceptor          |
| TCCACGTA db/m1 | db/m | 746  | 0.04192  | FALSE | 50.66605 | TRUE  |                        |
| TCCACGTA db/m1 | db/m | 1214 | 0.041154 | FALSE | 2.155564 | FALSE | Photoreceptor          |
| TCCACGTA db/m1 | db/m | 3981 | 0.015581 | FALSE | 1.161727 | FALSE | Endothelia Venous EC   |
| TCCACGTC db/m1 | db/m | 517  | 0.017434 | FALSE | 3.451959 | FALSE | Endothelia Capillary E |
| TCCACGTC db/m1 | db/m | 3692 | 0.03313  | FALSE | 1.176713 | FALSE | Endothelia Venous EC   |
| TCCACGTC db/m1 | db/m | 1395 | 0.041154 | FALSE | 1.440392 | FALSE | Photoreceptor          |
| TCCACGTC db/m1 | db/m | 1745 | 0.060641 | FALSE | 1.859087 | FALSE | Photoreceptor          |
| TCCACGTC db/m1 | db/m | 2516 | 0.095727 | FALSE | 7.721806 | TRUE  |                        |
| TCCACGTT db/m1 | db/m | 4610 | 0.021286 | FALSE | 0.75425  | FALSE | Photoreceptor          |

|                |      |      |          |       |          |       |                       |
|----------------|------|------|----------|-------|----------|-------|-----------------------|
| TCCAGAAC db/m1 | db/m | 1677 | 0.061912 | FALSE | 1.29063  | FALSE | Photoreceptor         |
| TCCAGAAC db/m1 | db/m | 7584 | 0.015287 | FALSE | 1.044313 | FALSE | Photoreceptor         |
| TCCAGAAC db/m1 | db/m | 6152 | 0.03313  | FALSE | 0.426578 | FALSE | Photoreceptor         |
| TCCAGAAI db/m1 | db/m | 1025 | 0.076994 | FALSE | 2.240051 | FALSE | EndotheliaCapillary E |
| TCCAGAAI db/m1 | db/m | 2766 | 0.010614 | FALSE | 1.092454 | FALSE | Photoreceptor         |
| TCCATCGC db/m1 | db/m | 8216 | 0.026328 | FALSE | 0.804233 | FALSE | Photoreceptor         |
| TCCATCGC db/m1 | db/m | 928  | 0.040404 | FALSE | 0.97115  | FALSE | Photoreceptor         |
| TCCATCGT db/m1 | db/m | 3102 | 0.038953 | FALSE | 1.092206 | FALSE | Photoreceptor         |
| TCCATGCA db/m1 | db/m | 3998 | 0.058205 | FALSE | 1.504949 | FALSE | Photoreceptor         |
| TCCATGCC db/m1 | db/m | 3120 | 0.009712 | FALSE | 1.43975  | FALSE | Neuron                |
| TCCATGCC db/m1 | db/m | 4821 | 0.014711 | FALSE | 0.784978 | FALSE | Photoreceptor         |
| TCCATGCC db/m1 | db/m | 7703 | 0.019455 | FALSE | 1.120231 | FALSE | Photoreceptor         |
| TCCATGCC db/m1 | db/m | 3449 | 0.018761 | FALSE | 1.840729 | FALSE | Photoreceptor         |
| TCCATGCC db/m1 | db/m | 1510 | 0.03313  | FALSE | 1.417277 | FALSE | Photoreceptor         |
| TCCATGCT db/m1 | db/m | 1163 | 0.05065  | FALSE | 1.003588 | FALSE | Photoreceptor         |
| TCCATGCT db/m1 | db/m | 1233 | 0.098234 | FALSE | 1.303461 | FALSE | Photoreceptor         |
| TCCATGCT db/m1 | db/m | 862  | 0.045165 | FALSE | 2.843344 | FALSE | Muller cell           |
| TCCATGCT db/m1 | db/m | 2477 | 0.029787 | FALSE | 1.565314 | FALSE | Neuron                |
| TCCATGCT db/m1 | db/m | 642  | 0.060641 | FALSE | 3.933872 | FALSE | Muller cell           |
| TCCCACAA db/m1 | db/m | 861  | 0.026796 | FALSE | 1.90046  | FALSE | Photoreceptor         |
| TCCCACAA db/m1 | db/m | 7777 | 0.036232 | FALSE | 0.665101 | FALSE | Photoreceptor         |
| TCCCACAC db/m1 | db/m | 1722 | 0.045165 | FALSE | 1.137242 | FALSE | Photoreceptor         |
| TCCCACAT db/m1 | db/m | 5756 | 0.031973 | FALSE | 1.15239  | FALSE | Photoreceptor         |
| TCCCACAT db/m1 | db/m | 3156 | 0.068864 | FALSE | 0.946746 | FALSE | Photoreceptor         |
| TCCCAGTA db/m1 | db/m | 1221 | 0.04192  | FALSE | 0.536568 | FALSE | Photoreceptor         |
| TCCCAGTA db/m1 | db/m | 484  | 0.091004 | FALSE | 46.22641 | TRUE  |                       |
| TCCCAGTC db/m1 | db/m | 707  | 0.049679 | FALSE | 47.86132 | TRUE  |                       |
| TCCCAGTC db/m1 | db/m | 4379 | 0.020536 | FALSE | 0.963505 | FALSE | Photoreceptor         |
| TCCCAGTC db/m1 | db/m | 643  | 0.028754 | FALSE | 0.674454 | FALSE | Neuron                |
| TCCCAGTC db/m1 | db/m | 1371 | 0.007636 | FALSE | 1.517792 | FALSE | Pericyte              |
| TCCCAGTC db/m1 | db/m | 9540 | 0.013074 | FALSE | 0.773704 | FALSE | Photoreceptor         |
| TCCCAGTC db/m1 | db/m | 1614 | 0.076994 | FALSE | 1.221305 | FALSE | Photoreceptor         |
| TCCCAGTC db/m1 | db/m | 4835 | 0.055901 | FALSE | 1.160842 | FALSE | Photoreceptor         |
| TCCCAGTT db/m1 | db/m | 2423 | 0.019106 | FALSE | 1.172646 | FALSE | EndotheliaAterial EC  |
| TCCCATGA db/m1 | db/m | 8656 | 0.015581 | FALSE | 0.729755 | FALSE | Photoreceptor         |
| TCCCATGA db/m1 | db/m | 2356 | 0.026328 | FALSE | 1.942295 | FALSE | Neuron                |
| TCCCATGC db/m1 | db/m | 4059 | 0.009277 | FALSE | 1.436513 | FALSE | Photoreceptor         |
| TCCCATGC db/m1 | db/m | 6097 | 0.067388 | FALSE | 1.032157 | FALSE | Photoreceptor         |
| TCCCATGC db/m1 | db/m | 815  | 0.023682 | FALSE | 3.104696 | FALSE | Muller cell           |
| TCCCATGC db/m1 | db/m | 631  | 0.059406 | FALSE | 0.92652  | FALSE | Muller cell           |
| TCCCATGC db/m1 | db/m | 415  | 0.064568 | FALSE | 15.82953 | TRUE  |                       |
| TCCCATGC db/m1 | db/m | 3482 | 0.030859 | FALSE | 1.415513 | FALSE | Photoreceptor         |
| TCCCATGC db/m1 | db/m | 2823 | 0.031411 | FALSE | 0.961583 | FALSE | Photoreceptor         |
| TCCGAAAC db/m1 | db/m | 1039 | 0.026796 | FALSE | 1.828533 | FALSE | Photoreceptor         |
| TCCGAAAC db/m1 | db/m | 6995 | 0.006683 | FALSE | 0.920622 | FALSE | Photoreceptor         |
| TCCGAAAC db/m1 | db/m | 619  | 0.088776 | FALSE | 1.352542 | FALSE | Photoreceptor         |
| TCCGAAAC db/m1 | db/m | 2340 | 0.110586 | TRUE  | 3.719567 | FALSE |                       |

|                |      |      |          |       |          |       |                        |
|----------------|------|------|----------|-------|----------|-------|------------------------|
| TCCGAAAC db/m1 | db/m | 948  | 0.122691 | TRUE  | 11.97682 | TRUE  |                        |
| TCCGAAAC db/m1 | db/m | 1187 | 0.058205 | FALSE | 2.678154 | FALSE | Muller cell            |
| TCCGAAAC db/m1 | db/m | 4415 | 0.280108 | TRUE  | 4.887636 | FALSE |                        |
| TCCGAAAT db/m1 | db/m | 8111 | 0.013876 | FALSE | 0.745427 | FALSE | Photoreceptor          |
| TCCGAAAT db/m1 | db/m | 6288 | 0.008234 | FALSE | 0.982667 | FALSE | Photoreceptor          |
| TCCGATCT db/m1 | db/m | 1452 | 0.018088 | FALSE | 1.118297 | FALSE | Endothelia Capillary E |
| TCCGATCT db/m1 | db/m | 386  | 0.164835 | TRUE  | 11.48776 | TRUE  |                        |
| TCCGATCT db/m1 | db/m | 1360 | 0.068864 | FALSE | 26.53472 | TRUE  |                        |
| TCCGATCT db/m1 | db/m | 481  | 0.04192  | FALSE | 2.197095 | FALSE | Photoreceptor          |
| TCCGGGA db/m1  | db/m | 1242 | 0.039671 | FALSE | 4.551854 | FALSE | Muller cell            |
| TCCGGGA db/m1  | db/m | 7977 | 0.018088 | FALSE | 0.737851 | FALSE | Photoreceptor          |
| TCCGGGA db/m1  | db/m | 857  | 0.061912 | FALSE | 1.90915  | FALSE | Photoreceptor          |
| TCCGGGA db/m1  | db/m | 796  | 0.070386 | FALSE | 3.788513 | FALSE | Muller cell            |
| TCCGGGA db/m1  | db/m | 450  | 0.040404 | FALSE | 1.425892 | FALSE | Muller cell            |
| TCCGGGA db/m1  | db/m | 2738 | 0.004116 | FALSE | 1.11818  | FALSE | Neuron                 |
| TCCGGGA db/m1  | db/m | 1328 | 0.075259 | FALSE | 1.023349 | FALSE | Photoreceptor          |
| TCCGGGA db/m1  | db/m | 3636 | 0.013876 | FALSE | 1.22305  | FALSE | Endothelia Venous EC   |
| TCCGGGA db/m1  | db/m | 850  | 0.013338 | FALSE | 0.355685 | FALSE | Photoreceptor          |
| TCCGGGA db/m1  | db/m | 298  | 0.059406 | FALSE | 4.58307  | FALSE | Photoreceptor          |
| TCCGTGTC db/m1 | db/m | 1559 | 0.091004 | FALSE | 20.00565 | TRUE  |                        |
| TCCGTGTC db/m1 | db/m | 2779 | 0.026796 | FALSE | 1.086463 | FALSE | Photoreceptor          |
| TCCGTGTC db/m1 | db/m | 1262 | 0.018761 | FALSE | 0.765943 | FALSE | Photoreceptor          |
| TCCGTGTT db/m1 | db/m | 738  | 0.041154 | FALSE | 0.670449 | FALSE | Photoreceptor          |
| TCCTAATA db/m1 | db/m | 1278 | 0.088776 | FALSE | 2.541123 | FALSE | Photoreceptor          |
| TCCTAATA db/m1 | db/m | 901  | 0.031973 | FALSE | 1.93407  | FALSE | Photoreceptor          |
| TCCTAATA db/m1 | db/m | 8066 | 0.019455 | FALSE | 0.806259 | FALSE | Photoreceptor          |
| TCCTAATC db/m1 | db/m | 1846 | 0.033726 | FALSE | 1.244197 | FALSE | Photoreceptor          |
| TCCTAATC db/m1 | db/m | 1374 | 0.017114 | FALSE | 1.559177 | FALSE | Endothelia Capillary E |
| TCCTAATC db/m1 | db/m | 4571 | 0.030318 | FALSE | 1.010662 | FALSE | Photoreceptor          |
| TCCTAATC db/m1 | db/m | 2331 | 0.119124 | TRUE  | 18.20368 | TRUE  |                        |
| TCCTAATG db/m1 | db/m | 2117 | 0.027273 | FALSE | 0.951993 | FALSE | Endothelia Capillary E |
| TCCTAATG db/m1 | db/m | 932  | 0.067388 | FALSE | 4.026813 | FALSE | Muller cell            |
| TCCTAATG db/m1 | db/m | 1578 | 0.023682 | FALSE | 1.310873 | FALSE | Neuron                 |
| TCCTAATG db/m1 | db/m | 1290 | 0.04192  | FALSE | 1.133295 | FALSE | Photoreceptor          |
| TCCTAATG db/m1 | db/m | 4390 | 0.032546 | FALSE | 1.061369 | FALSE | Endothelia Venous EC   |
| TCCTAATT db/m1 | db/m | 5497 | 0.021669 | FALSE | 1.00557  | FALSE | Photoreceptor          |
| TCCTAATT db/m1 | db/m | 539  | 0.095727 | FALSE | 3.069383 | FALSE | Muller cell            |
| TCCTCCCA db/m1 | db/m | 2623 | 0.021669 | FALSE | 1.374223 | FALSE | Endothelia Capillary E |
| TCCTCCCC db/m1 | db/m | 2709 | 0.020171 | FALSE | 1.312553 | FALSE | Endothelia Venous EC   |
| TCCTCCCG db/m1 | db/m | 1030 | 0.034334 | FALSE | 1.073837 | FALSE | Photoreceptor          |
| TCCTCCCT db/m1 | db/m | 1547 | 0.039671 | FALSE | 1.822831 | FALSE | Photoreceptor          |
| TCCTCGAA db/m1 | db/m | 377  | 0.052669 | FALSE | 3.380178 | FALSE | Photoreceptor          |
| TCCTCGAA db/m1 | db/m | 602  | 0.075259 | FALSE | 3.756095 | FALSE | Muller cell            |
| TCCTCGAG db/m1 | db/m | 2181 | 0.027758 | FALSE | 1.439746 | FALSE | Endothelia Capillary E |
| TCCTCGAG db/m1 | db/m | 2497 | 0.031411 | FALSE | 1.306916 | FALSE | Endothelia Capillary E |
| TCCTCGAG db/m1 | db/m | 2287 | 0.059406 | FALSE | 1.687758 | FALSE | Photoreceptor          |
| TCCTCGAG db/m1 | db/m | 1740 | 0.143501 | TRUE  | 6.346215 | TRUE  |                        |

|                |      |       |          |       |          |       |                        |
|----------------|------|-------|----------|-------|----------|-------|------------------------|
| TCCTCGAT db/m1 | db/m | 473   | 0.020908 | FALSE | 0.947151 | FALSE | Photoreceptor          |
| TCCTCGAT db/m1 | db/m | 474   | 0.042704 | FALSE | 2.879193 | FALSE | Muller cell            |
| TCCTCTTC db/m1 | db/m | 988   | 0.082569 | FALSE | 2.645553 | FALSE | Neuron                 |
| TCCTCTTC db/m1 | db/m | 1128  | 0.057037 | FALSE | 0.928501 | FALSE | Photoreceptor          |
| TCCTCTTC db/m1 | db/m | 1327  | 0.059406 | FALSE | 1.698416 | FALSE | Photoreceptor          |
| TCCTCTTG db/m1 | db/m | 600   | 0.013338 | FALSE | 0.209268 | FALSE | Photoreceptor          |
| TCCTCTTT db/m1 | db/m | 4335  | 0.020171 | FALSE | 1.433243 | FALSE | Neuron                 |
| TCCTCTTT db/m1 | db/m | 1682  | 0.022857 | FALSE | 0.964528 | FALSE | Photoreceptor          |
| TCCTCTTT db/m1 | db/m | 7862  | 0.024105 | FALSE | 0.943266 | FALSE | Photoreceptor          |
| TCCTGCAA db/m1 | db/m | 772   | 0.029787 | FALSE | 0.793792 | FALSE | Photoreceptor          |
| TCCTGCAA db/m1 | db/m | 2732  | 0.051646 | FALSE | 1.553945 | FALSE | Photoreceptor          |
| TCCTGCAC db/m1 | db/m | 822   | 0.009933 | FALSE | 1.653585 | FALSE | Endothelia Capillary E |
| TCCTGCAC db/m1 | db/m | 985   | 0.014711 | FALSE | 1.591061 | FALSE | Photoreceptor          |
| TCCTGCAC db/m1 | db/m | 637   | 0.049679 | FALSE | 2.176388 | FALSE | Photoreceptor          |
| TCCTGCAC db/m1 | db/m | 2767  | 0.04192  | FALSE | 1.17105  | FALSE | Photoreceptor          |
| TCCTGCAT db/m1 | db/m | 7970  | 0.012814 | FALSE | 1.004122 | FALSE | Photoreceptor          |
| TCCTGCAT db/m1 | db/m | 1845  | 0.098234 | FALSE | 2.253858 | FALSE | Neuron                 |
| TCCTTCTC db/m1 | db/m | 1523  | 0.046025 | FALSE | 15.51833 | TRUE  |                        |
| TCCTTCTC db/m1 | db/m | 2979  | 0.061912 | FALSE | 1.16461  | FALSE | Endothelia Venous EC   |
| TCCTTCTC db/m1 | db/m | 4164  | 0.026796 | FALSE | 0.906377 | FALSE | Photoreceptor          |
| TCCTTCTG db/m1 | db/m | 2854  | 0.046025 | FALSE | 1.427588 | FALSE | Pericyte               |
| TCCTTCTG db/m1 | db/m | 2996  | 0.055901 | FALSE | 1.233436 | FALSE | Photoreceptor          |
| TCCTTCTT db/m1 | db/m | 408   | 0.013876 | FALSE | 2.62572  | FALSE | Muller cell            |
| TCCTTCTT db/m1 | db/m | 3932  | 0.034334 | FALSE | 1.234851 | FALSE | Endothelia Venous EC   |
| TCCTTCTT db/m1 | db/m | 2536  | 0.029266 | FALSE | 1.330707 | FALSE | Endothelia Capillary E |
| TCCTTTCA db/m1 | db/m | 5498  | 0.01981  | FALSE | 1.052419 | FALSE | Photoreceptor          |
| TCCTTTCC db/m1 | db/m | 353   | 0.044326 | FALSE | 9.163347 | TRUE  |                        |
| TCCTTTCT db/m1 | db/m | 10078 | 0.013074 | FALSE | 0.733487 | FALSE | Photoreceptor          |
| TCCTTTCT db/m1 | db/m | 8932  | 0.013605 | FALSE | 0.850842 | FALSE | Photoreceptor          |
| TCGAACA db/m1  | db/m | 2421  | 0.021286 | FALSE | 1.233912 | FALSE | Endothelia Capillary E |
| TCGAACA db/m1  | db/m | 1246  | 0.034334 | FALSE | 1.676048 | FALSE | Endothelia Capillary E |
| TCGAACA db/m1  | db/m | 573   | 0.044326 | FALSE | 3.010379 | FALSE | Muller cell            |
| TCGAACA db/m1  | db/m | 1412  | 0.049679 | FALSE | 2.203969 | FALSE | Photoreceptor          |
| TCGAACA db/m1  | db/m | 3316  | 0.103567 | TRUE  | 11.29209 | TRUE  |                        |
| TCGAACA db/m1  | db/m | 902   | 0.03313  | FALSE | 2.203317 | FALSE | Photoreceptor          |
| TCGAACA db/m1  | db/m | 3761  | 0.063221 | FALSE | 1.466115 | FALSE | Photoreceptor          |
| TCGAACA db/m1  | db/m | 1088  | 0.029266 | FALSE | 0.868176 | FALSE | Photoreceptor          |
| TCGAACA db/m1  | db/m | 2251  | 0.018422 | FALSE | 0.628358 | FALSE | Photoreceptor          |
| TCGAACAT db/m1 | db/m | 1470  | 0.048732 | FALSE | 1.900535 | FALSE | Photoreceptor          |
| TCGAAGT db/m1  | db/m | 555   | 0.057037 | FALSE | 3.396522 | FALSE | Photoreceptor          |
| TCGAAGT db/m1  | db/m | 2241  | 0.035586 | FALSE | 1.167755 | FALSE | Photoreceptor          |
| TCGAAGT db/m1  | db/m | 1010  | 0.075259 | FALSE | 1.099488 | FALSE | Photoreceptor          |
| TCGAAGT db/m1  | db/m | 1895  | 0.027273 | FALSE | 0.994803 | FALSE | Endothelia Capillary E |
| TCGAAGT db/m1  | db/m | 2647  | 0.011561 | FALSE | 1.214272 | FALSE | Endothelia Venous EC   |
| TCGAAGT db/m1  | db/m | 499   | 0.027758 | FALSE | 1.115401 | FALSE | Photoreceptor          |
| TCGAAGTI db/m1 | db/m | 2910  | 0.039671 | FALSE | 1.083679 | FALSE | Photoreceptor          |
| TCGACCTA db/m1 | db/m | 826   | 0.064568 | FALSE | 1.69201  | FALSE | Photoreceptor          |



|                |      |      |          |       |          |       |                        |
|----------------|------|------|----------|-------|----------|-------|------------------------|
| TCGACCTC db/m1 | db/m | 947  | 0.034954 | FALSE | 2.242992 | FALSE | Photoreceptor          |
| TCGACCTT db/m1 | db/m | 2826 | 0.044326 | FALSE | 1.638528 | FALSE | Photoreceptor          |
| TCGACCTT db/m1 | db/m | 293  | 0.076994 | FALSE | 2.575172 | FALSE | Microglia              |
| TCGACGG/ db/m1 | db/m | 497  | 0.052669 | FALSE | 1.868496 | FALSE | Photoreceptor          |
| TCGACGG/ db/m1 | db/m | 473  | 0.028754 | FALSE | 1.729049 | FALSE | Photoreceptor          |
| TCGACGG/ db/m1 | db/m | 1718 | 0.034334 | FALSE | 1.640191 | FALSE | Photoreceptor          |
| TCGACGG( db/m1 | db/m | 808  | 0.036891 | FALSE | 1.890916 | FALSE | Photoreceptor          |
| TCGACGG( db/m1 | db/m | 912  | 0.026796 | FALSE | 1.000267 | FALSE | Photoreceptor          |
| TCGACGG( db/m1 | db/m | 1974 | 0.028251 | FALSE | 1.186525 | FALSE | Endothelia Capillary E |
| TCGACGG( db/m1 | db/m | 2750 | 0.024971 | FALSE | 1.443727 | FALSE | Endothelia Venous EC   |
| TCGACGG( db/m1 | db/m | 500  | 0.030318 | FALSE | 3.5827   | FALSE | Photoreceptor          |
| TCGACGG( db/m1 | db/m | 5519 | 0.012052 | FALSE | 1.161363 | FALSE | Photoreceptor          |
| TCGACGG( db/m1 | db/m | 4712 | 0.037564 | FALSE | 0.788425 | FALSE | Photoreceptor          |
| TCGACGG  db/m1 | db/m | 1083 | 0.028251 | FALSE | 0.864329 | FALSE | Photoreceptor          |
| TCGATTTA db/m1 | db/m | 1160 | 0.054795 | FALSE | 0.932042 | FALSE | Photoreceptor          |
| TCGATTTA db/m1 | db/m | 7223 | 0.028251 | FALSE | 1.035106 | FALSE | Endothelia Capillary E |
| TCGATTTA db/m1 | db/m | 1326 | 0.011561 | FALSE | 1.439115 | FALSE | Photoreceptor          |
| TCGATTTA db/m1 | db/m | 1138 | 0.007249 | FALSE | 1.331893 | FALSE | Endothelia Capillary E |
| TCGATTTC db/m1 | db/m | 1531 | 0.012052 | FALSE | 1.607507 | FALSE | Endothelia Capillary E |
| TCGATTTC db/m1 | db/m | 511  | 0.135645 | TRUE  | 2.534562 | FALSE |                        |
| TCGATTTC db/m1 | db/m | 4171 | 0.065957 | FALSE | 1.21952  | FALSE | Photoreceptor          |
| TCGATTTC db/m1 | db/m | 3744 | 0.028251 | FALSE | 1.339578 | FALSE | Photoreceptor          |
| TCGATTTG db/m1 | db/m | 3621 | 0.029787 | FALSE | 1.267726 | FALSE | Photoreceptor          |
| TCGATTTT db/m1 | db/m | 2915 | 0.046906 | FALSE | 1.058988 | FALSE | Photoreceptor          |
| TCGCACTA db/m1 | db/m | 1081 | 0.034954 | FALSE | 2.656664 | FALSE | Muller cell            |
| TCGCACTC db/m1 | db/m | 4800 | 0.049679 | FALSE | 1.090705 | FALSE | Endothelia Capillary E |
| TCGCACTT db/m1 | db/m | 2433 | 0.027273 | FALSE | 1.16523  | FALSE | Neuron                 |
| TCGCACTT db/m1 | db/m | 617  | 0.159016 | TRUE  | 35.47881 | TRUE  |                        |
| TCGCAGG/ db/m1 | db/m | 718  | 0.023266 | FALSE | 0.702684 | FALSE | Photoreceptor          |
| TCGCAGG/ db/m1 | db/m | 735  | 0.014429 | FALSE | 1.675641 | FALSE | Endothelia Capillary E |
| TCGCAGG/ db/m1 | db/m | 4056 | 0.03313  | FALSE | 1.092599 | FALSE | Photoreceptor          |
| TCGCAGG/ db/m1 | db/m | 2645 | 0.055901 | FALSE | 1.519941 | FALSE | Neuron                 |
| TCGCAGG( db/m1 | db/m | 4949 | 0.024971 | FALSE | 1.061413 | FALSE | Endothelia Venous EC   |
| TCGCAGG( db/m1 | db/m | 5727 | 0.026796 | FALSE | 1.242185 | FALSE | Photoreceptor          |
| TCGCAGG( db/m1 | db/m | 840  | 0.135645 | TRUE  | 4.735596 | FALSE |                        |
| TCGCAGG( db/m1 | db/m | 1234 | 0.060641 | FALSE | 0.450085 | FALSE | Photoreceptor          |
| TCGCAGG( db/m1 | db/m | 3645 | 0.051646 | FALSE | 0.867043 | FALSE | Photoreceptor          |
| TCGCAGG  db/m1 | db/m | 917  | 0.044326 | FALSE | 1.350705 | FALSE | Photoreceptor          |
| TCGCAGG  db/m1 | db/m | 3778 | 0.026328 | FALSE | 1.131597 | FALSE | Endothelia Venous EC   |
| TCGCAGG  db/m1 | db/m | 6824 | 0.021669 | FALSE | 0.675976 | FALSE | Photoreceptor          |
| TCGCTCAA db/m1 | db/m | 581  | 0.078788 | FALSE | 11.75847 | TRUE  |                        |
| TCGCTCAA db/m1 | db/m | 1251 | 0.031973 | FALSE | 1.527232 | FALSE | Photoreceptor          |
| TCGCTCAC db/m1 | db/m | 2181 | 0.030318 | FALSE | 1.289471 | FALSE | Endothelia Capillary E |
| TCGCTCAC db/m1 | db/m | 3559 | 0.024105 | FALSE | 1.041484 | FALSE | Endothelia Capillary E |
| TCGCTCAT db/m1 | db/m | 1451 | 0.095727 | FALSE | 1.305778 | FALSE | Photoreceptor          |
| TCGCTCAT db/m1 | db/m | 1204 | 0.037564 | FALSE | 3.030275 | FALSE | Endothelia Capillary E |
| TCGCTCAT db/m1 | db/m | 1116 | 0.04192  | FALSE | 1.440518 | FALSE | Photoreceptor          |

|                |      |      |          |       |          |       |                        |
|----------------|------|------|----------|-------|----------|-------|------------------------|
| TCGCTTGA db/m1 | db/m | 1948 | 0.014151 | FALSE | 1.226423 | FALSE | Endothelia Capillary E |
| TCGCTTGA db/m1 | db/m | 794  | 0.059406 | FALSE | 1.545003 | FALSE | Photoreceptor          |
| TCGCTTGA db/m1 | db/m | 548  | 0.021286 | FALSE | 2.021363 | FALSE | Photoreceptor          |
| TCGCTTGC db/m1 | db/m | 475  | 0.024971 | FALSE | 1.475794 | FALSE | Photoreceptor          |
| TCGCTTGC db/m1 | db/m | 7928 | 0.021286 | FALSE | 0.701542 | FALSE | Photoreceptor          |
| TCGCTTGC db/m1 | db/m | 479  | 0.018088 | FALSE | 2.285099 | FALSE | Photoreceptor          |
| TCGCTTGT db/m1 | db/m | 7116 | 0.067388 | FALSE | 0.78678  | FALSE | Photoreceptor          |
| TCGCTTGT db/m1 | db/m | 347  | 0.034954 | FALSE | 18.2     | TRUE  |                        |
| TCGGATA db/m1  | db/m | 729  | 0.106408 | TRUE  | 10.988   | TRUE  |                        |
| TCGGATA db/m1  | db/m | 7884 | 0.024105 | FALSE | 0.588576 | FALSE | Photoreceptor          |
| TCGGATA db/m1  | db/m | 503  | 0.08663  | FALSE | 4.646746 | FALSE | Muller cell            |
| TCGGATA db/m1  | db/m | 746  | 0.05065  | FALSE | 1.854214 | FALSE | Photoreceptor          |
| TCGGGAC db/m1  | db/m | 342  | 0.103567 | TRUE  | 27.34899 | TRUE  |                        |
| TCGGGAC db/m1  | db/m | 4794 | 0.159016 | TRUE  | 2.527255 | FALSE |                        |
| TCGGGCA db/m1  | db/m | 568  | 0.039671 | FALSE | 1.941662 | FALSE | Photoreceptor          |
| TCGGGCA db/m1  | db/m | 820  | 0.049679 | FALSE | 3.588986 | FALSE | Muller cell            |
| TCGGGCA db/m1  | db/m | 2730 | 0.013074 | FALSE | 1.334878 | FALSE | Endothelia Venous EC   |
| TCGGGCA db/m1  | db/m | 653  | 0.070386 | FALSE | 2.56983  | FALSE | Endothelia Capillary E |
| TCGGGCA db/m1  | db/m | 3042 | 0.080645 | FALSE | 0.944105 | FALSE | Endothelia Capillary E |
| TCGGGCA db/m1  | db/m | 6590 | 0.046906 | FALSE | 1.120408 | FALSE | Photoreceptor          |
| TCGGGCA db/m1  | db/m | 6720 | 0.010614 | FALSE | 1.066031 | FALSE | Photoreceptor          |
| TCGGGCA db/m1  | db/m | 7281 | 0.034954 | FALSE | 1.008939 | FALSE | Photoreceptor          |
| TCGGGCA db/m1  | db/m | 5386 | 0.020536 | FALSE | 1.039412 | FALSE | Photoreceptor          |
| TCGGGCA db/m1  | db/m | 1027 | 0.060641 | FALSE | 0.822596 | FALSE | Photoreceptor          |
| TCGGGCA db/m1  | db/m | 2988 | 0.084562 | FALSE | 1.501097 | FALSE | Neuron                 |
| TCGGGTG db/m1  | db/m | 1415 | 0.080645 | FALSE | 3.507016 | FALSE | Muller cell            |
| TCGGGTG db/m1  | db/m | 3638 | 0.068864 | FALSE | 8.257918 | TRUE  |                        |
| TCGGGTG db/m1  | db/m | 4444 | 0.112477 | TRUE  | 4.862997 | FALSE |                        |
| TCGGGTG db/m1  | db/m | 3418 | 0.032546 | FALSE | 1.24972  | FALSE | Endothelia Venous EC   |
| TCGGGTG db/m1  | db/m | 5776 | 0.009933 | FALSE | 1.012227 | FALSE | Photoreceptor          |
| TCGGGTG db/m1  | db/m | 702  | 0.032546 | FALSE | 3.650315 | FALSE | Muller cell            |
| TCGGGTG db/m1  | db/m | 1378 | 0.030859 | FALSE | 2.44038  | FALSE | Neuron                 |
| TCGGTCTA db/m1 | db/m | 1482 | 0.014997 | FALSE | 1.596639 | FALSE | Endothelia Capillary E |
| TCGGTCTA db/m1 | db/m | 4856 | 0.011081 | FALSE | 1.259174 | FALSE | Photoreceptor          |
| TCGGTCTA db/m1 | db/m | 800  | 0.093319 | FALSE | 16.87898 | TRUE  |                        |
| TCGGTCTA db/m1 | db/m | 1086 | 0.088776 | FALSE | 4.394616 | FALSE | Muller cell            |
| TCGGTCTC db/m1 | db/m | 4316 | 0.018088 | FALSE | 1.354572 | FALSE | Photoreceptor          |
| TCGGTCTC db/m1 | db/m | 4442 | 0.019106 | FALSE | 0.911093 | FALSE | Photoreceptor          |
| TCGGTCTC db/m1 | db/m | 388  | 0.013338 | FALSE | 0.808388 | FALSE | Photoreceptor          |
| TCGGTCTC db/m1 | db/m | 8006 | 0.011805 | FALSE | 0.847357 | FALSE | Photoreceptor          |
| TCGGTCTC db/m1 | db/m | 2496 | 0.003959 | FALSE | 1.196769 | FALSE | Neuron                 |
| TCGGTCTC db/m1 | db/m | 809  | 0.048732 | FALSE | 3.371107 | FALSE | Muller cell            |
| TCGGTCTT db/m1 | db/m | 905  | 0.026796 | FALSE | 2.303303 | FALSE | Photoreceptor          |
| TCGGTCTT db/m1 | db/m | 2818 | 0.033726 | FALSE | 1.436484 | FALSE | Photoreceptor          |
| TCGTAGA db/m1  | db/m | 1950 | 0.021286 | FALSE | 1.271135 | FALSE | Microglia              |
| TCGTAGA db/m1  | db/m | 2140 | 0.025868 | FALSE | 1.504079 | FALSE | Endothelia Capillary E |
| TCGTAGA db/m1  | db/m | 1080 | 0.047807 | FALSE | 2.24447  | FALSE | Endothelia Capillary E |

|                |      |      |          |       |          |       |                        |
|----------------|------|------|----------|-------|----------|-------|------------------------|
| TCGTAGAC db/m1 | db/m | 8257 | 0.013876 | FALSE | 0.730858 | FALSE | Photoreceptor          |
| TCGTAGAC db/m1 | db/m | 3052 | 0.036232 | FALSE | 0.743675 | FALSE | Photoreceptor          |
| TCGTAGAT db/m1 | db/m | 892  | 0.091004 | FALSE | 29.68923 | TRUE  |                        |
| TCGTCCAC db/m1 | db/m | 7097 | 0.027758 | FALSE | 1.13616  | FALSE | Photoreceptor          |
| TCGTCCAC db/m1 | db/m | 546  | 0.071958 | FALSE | 3.281143 | FALSE | Pericyte               |
| TCGTCCAC db/m1 | db/m | 433  | 0.119124 | TRUE  | 27.07809 | TRUE  |                        |
| TCGTCCAC db/m1 | db/m | 1054 | 0.093319 | FALSE | 2.591287 | FALSE | Muller cell            |
| TCGTCCAG db/m1 | db/m | 571  | 0.070386 | FALSE | 2.419822 | FALSE | Endothelia Capillary E |
| TCGTGCTA db/m1 | db/m | 7865 | 0.045165 | FALSE | 0.728971 | FALSE | Photoreceptor          |
| TCGTGCTA db/m1 | db/m | 1483 | 0.126958 | TRUE  | 4.228422 | FALSE |                        |
| TCGTGCTA db/m1 | db/m | 400  | 0.016799 | FALSE | 11.57324 | TRUE  |                        |
| TCGTGCTA db/m1 | db/m | 3760 | 0.009933 | FALSE | 1.18293  | FALSE | Photoreceptor          |
| TCGTGCTC db/m1 | db/m | 4467 | 0.047807 | FALSE | 0.95709  | FALSE | Photoreceptor          |
| TCGTGCTC db/m1 | db/m | 1126 | 0.016181 | FALSE | 1.332021 | FALSE | Photoreceptor          |
| TCGTGCTC db/m1 | db/m | 3800 | 0.033726 | FALSE | 1.105497 | FALSE | Photoreceptor          |
| TCGTGCTC db/m1 | db/m | 2982 | 0.063221 | FALSE | 1.21706  | FALSE | Photoreceptor          |
| TCGTGCTC db/m1 | db/m | 889  | 0.058205 | FALSE | 1.826733 | FALSE | Photoreceptor          |
| TCGTGCTC db/m1 | db/m | 414  | 0.058205 | FALSE | 4.492198 | FALSE | Muller cell            |
| TCGTGCTT db/m1 | db/m | 1069 | 0.115723 | TRUE  | 5.730994 | TRUE  |                        |
| TCGTGCTT db/m1 | db/m | 1769 | 0.064568 | FALSE | 3.185158 | FALSE | Muller cell            |
| TCGTGCTT db/m1 | db/m | 2407 | 0.048732 | FALSE | 1.063357 | FALSE | Photoreceptor          |
| TCGTGGG db/m1  | db/m | 436  | 0.082569 | FALSE | 13.78299 | TRUE  |                        |
| TCGTGGG db/m1  | db/m | 1446 | 0.018088 | FALSE | 1.449133 | FALSE | Endothelia Capillary E |
| TCGTGGG db/m1  | db/m | 662  | 0.067388 | FALSE | 1.485065 | FALSE | Microglia              |
| TCGTGGG db/m1  | db/m | 3285 | 0.078788 | FALSE | 6.113844 | TRUE  |                        |
| TCTAACTA db/m1 | db/m | 965  | 0.058205 | FALSE | 2.142571 | FALSE | Photoreceptor          |
| TCTAACTA db/m1 | db/m | 7007 | 0.046025 | FALSE | 1.120709 | FALSE | Photoreceptor          |
| TCTAACTC db/m1 | db/m | 8297 | 0.013338 | FALSE | 0.799196 | FALSE | Photoreceptor          |
| TCTAACTC db/m1 | db/m | 2231 | 0.040404 | FALSE | 1.15673  | FALSE | Endothelia Venous EC   |
| TCTAACTC db/m1 | db/m | 2310 | 0.038953 | FALSE | 1.155751 | FALSE | Photoreceptor          |
| TCTAACTG db/m1 | db/m | 971  | 0.031411 | FALSE | 2.127561 | FALSE | Pericyte               |
| TCTAACTT db/m1 | db/m | 5026 | 0.033726 | FALSE | 1.190791 | FALSE | Photoreceptor          |
| TCTAACTT db/m1 | db/m | 531  | 0.061912 | FALSE | 3.447266 | FALSE | Photoreceptor          |
| TCTACATA db/m1 | db/m | 3151 | 0.032546 | FALSE | 1.033597 | FALSE | Photoreceptor          |
| TCTACATC db/m1 | db/m | 3797 | 0.018761 | FALSE | 1.261953 | FALSE | Photoreceptor          |
| TCTACATC db/m1 | db/m | 4119 | 0.040404 | FALSE | 1.212038 | FALSE | Photoreceptor          |
| TCTACATC db/m1 | db/m | 3271 | 0.021286 | FALSE | 1.056304 | FALSE | Endothelia Venous EC   |
| TCTACATG db/m1 | db/m | 3343 | 0.013605 | FALSE | 1.230079 | FALSE | Photoreceptor          |
| TCTACATG db/m1 | db/m | 6479 | 0.044326 | FALSE | 0.856168 | FALSE | Photoreceptor          |
| TCTACATG db/m1 | db/m | 2779 | 0.015879 | FALSE | 1.360237 | FALSE | Endothelia Capillary E |
| TCTACATG db/m1 | db/m | 1475 | 0.080645 | FALSE | 2.131883 | FALSE | Photoreceptor          |
| TCTACCGA db/m1 | db/m | 803  | 0.030318 | FALSE | 2.029149 | FALSE | Photoreceptor          |
| TCTACCGA db/m1 | db/m | 948  | 0.023682 | FALSE | 1.126979 | FALSE | Photoreceptor          |
| TCTACCGA db/m1 | db/m | 2523 | 0.054795 | FALSE | 1.299116 | FALSE | Photoreceptor          |
| TCTACCGC db/m1 | db/m | 1010 | 0.018422 | FALSE | 0.641954 | FALSE | Photoreceptor          |
| TCTACCGC db/m1 | db/m | 6468 | 0.041154 | FALSE | 0.998759 | FALSE | Photoreceptor          |
| TCTACCGC db/m1 | db/m | 6438 | 0.148377 | TRUE  | 1.184326 | FALSE |                        |

|                |      |      |          |       |          |       |                        |
|----------------|------|------|----------|-------|----------|-------|------------------------|
| TCTACCGT db/m1 | db/m | 7648 | 0.054795 | FALSE | 0.406846 | FALSE | Photoreceptor          |
| TCTACCGT db/m1 | db/m | 2619 | 0.044326 | FALSE | 0.822674 | FALSE | Photoreceptor          |
| TCTACCGT db/m1 | db/m | 392  | 0.046906 | FALSE | 4.588261 | FALSE | Muller cell            |
| TCTACCGT db/m1 | db/m | 1846 | 0.038251 | FALSE | 1.06917  | FALSE | Photoreceptor          |
| TCTACCGT db/m1 | db/m | 1185 | 0.033726 | FALSE | 0.834063 | FALSE | Photoreceptor          |
| TCTATACA db/m1 | db/m | 1369 | 0.032546 | FALSE | 1.11931  | FALSE | Photoreceptor          |
| TCTATACA db/m1 | db/m | 1271 | 0.039671 | FALSE | 0.872233 | FALSE | Photoreceptor          |
| TCTATACA db/m1 | db/m | 3835 | 0.020171 | FALSE | 1.170324 | FALSE | Endothelia Venous EC   |
| TCTATACA db/m1 | db/m | 933  | 0.044326 | FALSE | 1.076908 | FALSE | Photoreceptor          |
| TCTATACC db/m1 | db/m | 829  | 0.025868 | FALSE | 0.685299 | FALSE | Photoreceptor          |
| TCTATACC db/m1 | db/m | 492  | 0.027273 | FALSE | 1.311548 | FALSE | Photoreceptor          |
| TCTATACC db/m1 | db/m | 1274 | 0.076994 | FALSE | 1.554203 | FALSE | Photoreceptor          |
| TCTATACG db/m1 | db/m | 575  | 0.064568 | FALSE | 1.747093 | FALSE | Photoreceptor          |
| TCTATACG db/m1 | db/m | 821  | 0.060641 | FALSE | 43.43164 | TRUE  |                        |
| TCTATACG db/m1 | db/m | 455  | 0.064568 | FALSE | 1.468691 | FALSE | Photoreceptor          |
| TCTATACG db/m1 | db/m | 5454 | 0.028754 | FALSE | 1.095501 | FALSE | Photoreceptor          |
| TCTATACT db/m1 | db/m | 4333 | 0.228861 | TRUE  | 4.4913   | FALSE |                        |
| TCTATCAA db/m1 | db/m | 3168 | 0.021669 | FALSE | 0.809369 | FALSE | Photoreceptor          |
| TCTATCAA db/m1 | db/m | 1027 | 0.073582 | FALSE | 1.653112 | FALSE | Photoreceptor          |
| TCTATCAA db/m1 | db/m | 5248 | 0.013338 | FALSE | 1.014932 | FALSE | Photoreceptor          |
| TCTATCAG db/m1 | db/m | 2388 | 0.018422 | FALSE | 1.303303 | FALSE | Endothelia Venous EC   |
| TCTATCAG db/m1 | db/m | 934  | 0.021286 | FALSE | 1.96623  | FALSE | Endothelia Capillary E |
| TCTATCAG db/m1 | db/m | 2817 | 0.014151 | FALSE | 1.555033 | FALSE | Photoreceptor          |
| TCTATCAG db/m1 | db/m | 2233 | 0.030318 | FALSE | 1.244481 | FALSE | Endothelia Capillary E |
| TCTATCAT db/m1 | db/m | 1690 | 0.060641 | FALSE | 1.492801 | FALSE | Photoreceptor          |
| TCTATCAT db/m1 | db/m | 492  | 0.010157 | FALSE | 1.009266 | FALSE | Photoreceptor          |
| TCTATCAT db/m1 | db/m | 8368 | 0.028251 | FALSE | 0.557831 | FALSE | Photoreceptor          |
| TCTCACGA db/m1 | db/m | 1433 | 0.088776 | FALSE | 12.46874 | TRUE  |                        |
| TCTCACGG db/m1 | db/m | 1677 | 0.022059 | FALSE | 1.011495 | FALSE | Photoreceptor          |
| TCTCAGCA db/m1 | db/m | 2503 | 0.008032 | FALSE | 0.683591 | FALSE | Neuron                 |
| TCTCAGCT db/m1 | db/m | 3395 | 0.071958 | FALSE | 1.985287 | FALSE | Neuron                 |
| TCTCAGCT db/m1 | db/m | 1174 | 0.028251 | FALSE | 1.111167 | FALSE | Photoreceptor          |
| TCTCAGCT db/m1 | db/m | 6229 | 0.130374 | TRUE  | 1.425439 | FALSE |                        |
| TCTCCGAA db/m1 | db/m | 1503 | 0.051646 | FALSE | 1.496463 | FALSE | Endothelia Capillary E |
| TCTCCGAA db/m1 | db/m | 693  | 0.039671 | FALSE | 0.446172 | FALSE | Photoreceptor          |
| TCTCCGAC db/m1 | db/m | 416  | 0.022455 | FALSE | 0.854649 | FALSE | Photoreceptor          |
| TCTCCGAT db/m1 | db/m | 460  | 0.027758 | FALSE | 60.2649  | TRUE  |                        |
| TCTCTGGA db/m1 | db/m | 941  | 0.048732 | FALSE | 1.743419 | FALSE | Photoreceptor          |
| TCTCTGGT db/m1 | db/m | 4167 | 0.059406 | FALSE | 1.021051 | FALSE | Photoreceptor          |
| TCTGCCAA db/m1 | db/m | 721  | 0.036232 | FALSE | 54.03944 | TRUE  |                        |
| TCTGCCAA db/m1 | db/m | 544  | 0.024105 | FALSE | 2.928839 | FALSE | Photoreceptor          |
| TCTGCCAA db/m1 | db/m | 5226 | 0.103567 | TRUE  | 4.569745 | FALSE |                        |
| TCTGCCAA db/m1 | db/m | 5345 | 0.027273 | FALSE | 1.076049 | FALSE | Photoreceptor          |
| TCTGCCAC db/m1 | db/m | 983  | 0.052669 | FALSE | 1.12512  | FALSE | Photoreceptor          |
| TCTGCCAG db/m1 | db/m | 903  | 0.055901 | FALSE | 1.322532 | FALSE | Photoreceptor          |
| TCTGCCAG db/m1 | db/m | 2624 | 0.060641 | FALSE | 1.667876 | FALSE | Photoreceptor          |
| TCTGCCAT db/m1 | db/m | 7644 | 0.030859 | FALSE | 0.818329 | FALSE | Photoreceptor          |

|                |      |      |          |       |          |       |                         |
|----------------|------|------|----------|-------|----------|-------|-------------------------|
| TCTGGCTA db/m1 | db/m | 816  | 0.021669 | FALSE | 4.18499  | FALSE | Muller cell             |
| TCTGGCTC db/m1 | db/m | 2221 | 0.025868 | FALSE | 1.148564 | FALSE | Photoreceptor           |
| TCTGGCTC db/m1 | db/m | 7561 | 0.016799 | FALSE | 0.897629 | FALSE | Photoreceptor           |
| TCTGGCTC db/m1 | db/m | 1118 | 0.034334 | FALSE | 0.89833  | FALSE | Photoreceptor           |
| TCTGGCTC db/m1 | db/m | 6759 | 0.032546 | FALSE | 0.977121 | FALSE | Photoreceptor           |
| TCTGGCTC db/m1 | db/m | 4167 | 0.024971 | FALSE | 1.314123 | FALSE | Endothelia Venous EC    |
| TCTGGCTC db/m1 | db/m | 2279 | 0.043505 | FALSE | 1.398767 | FALSE | Neuron                  |
| TCTGGCTT db/m1 | db/m | 969  | 0.029787 | FALSE | 1.984218 | FALSE | Photoreceptor           |
| TCTGGCTT db/m1 | db/m | 3379 | 0.053718 | FALSE | 1.509661 | FALSE | Photoreceptor           |
| TCTGGCTT db/m1 | db/m | 1394 | 0.031411 | FALSE | 0.606172 | FALSE | Photoreceptor           |
| TCTGGCTT db/m1 | db/m | 1639 | 0.014429 | FALSE | 1.291712 | FALSE | Endothelia Capillary EC |
| TCTGTCGA db/m1 | db/m | 5254 | 0.075259 | FALSE | 1.022897 | FALSE | Photoreceptor           |
| TCTGTCGA db/m1 | db/m | 1654 | 0.036232 | FALSE | 1.643149 | FALSE | Photoreceptor           |
| TCTGTCGA db/m1 | db/m | 7445 | 0.011805 | FALSE | 0.901671 | FALSE | Photoreceptor           |
| TCTGTCGC db/m1 | db/m | 1136 | 0.060641 | FALSE | 1.761138 | FALSE | Neuron                  |
| TCTGTCGC db/m1 | db/m | 3185 | 0.073582 | FALSE | 1.060557 | FALSE | Photoreceptor           |
| TCTGTCGC db/m1 | db/m | 5334 | 0.043505 | FALSE | 1.20743  | FALSE | Photoreceptor           |
| TCTGTCGC db/m1 | db/m | 1880 | 0.046906 | FALSE | 1.245057 | FALSE | Photoreceptor           |
| TCTTAGTA db/m1 | db/m | 1317 | 0.080645 | FALSE | 2.325212 | FALSE | Muller cell             |
| TCTTAGTA db/m1 | db/m | 2316 | 0.084562 | FALSE | 1.436535 | FALSE | Photoreceptor           |
| TCTTAGTA db/m1 | db/m | 796  | 0.010384 | FALSE | 0.834585 | FALSE | Photoreceptor           |
| TCTTAGTC db/m1 | db/m | 1042 | 0.054795 | FALSE | 1.887599 | FALSE | Photoreceptor           |
| TCTTAGTC db/m1 | db/m | 2455 | 0.003959 | FALSE | 1.51714  | FALSE | Neuron                  |
| TCTTAGTC db/m1 | db/m | 566  | 0.037564 | FALSE | 0.759574 | FALSE | Photoreceptor           |
| TCTTAGTT db/m1 | db/m | 460  | 0.026796 | FALSE | 9.33126  | TRUE  |                         |
| TCTTAGTT db/m1 | db/m | 2013 | 0.043505 | FALSE | 15.23385 | TRUE  |                         |
| TCTTAGTT db/m1 | db/m | 5741 | 0.042704 | FALSE | 1.216545 | FALSE | Photoreceptor           |
| TCTTCCTA db/m1 | db/m | 4871 | 0.019106 | FALSE | 0.861153 | FALSE | Photoreceptor           |
| TCTTCCTC db/m1 | db/m | 567  | 0.014151 | FALSE | 2.580269 | FALSE | Endothelia Capillary EC |
| TCTTCCTG db/m1 | db/m | 1072 | 0.012052 | FALSE | 1.202074 | FALSE | Endothelia Aterial EC   |
| TCTTCCTG db/m1 | db/m | 431  | 0.027758 | FALSE | 0.5063   | FALSE | Photoreceptor           |
| TCTTGCGC db/m1 | db/m | 1367 | 0.011805 | FALSE | 1.409332 | FALSE | Pericyte                |
| TCTTGCGC db/m1 | db/m | 1284 | 0.018761 | FALSE | 1.435665 | FALSE | Endothelia Capillary EC |
| TCTTGCGC db/m1 | db/m | 3801 | 0.019455 | FALSE | 1.055588 | FALSE | Endothelia Capillary EC |
| TCTTGCGC db/m1 | db/m | 486  | 0.041154 | FALSE | 1.945001 | FALSE | Photoreceptor           |
| TCTTGCGC db/m1 | db/m | 2218 | 0.013338 | FALSE | 1.18189  | FALSE | Endothelia Capillary EC |
| TCTTGCGC db/m1 | db/m | 2024 | 0.030859 | FALSE | 2.077516 | FALSE | Neuron                  |
| TCTTGCGC db/m1 | db/m | 4198 | 0.020908 | FALSE | 1.132253 | FALSE | Photoreceptor           |
| TCTTTGAA db/m1 | db/m | 965  | 0.036232 | FALSE | 3.971936 | FALSE | Muller cell             |
| TCTTTGAA db/m1 | db/m | 690  | 0.070386 | FALSE | 2.394029 | FALSE | Photoreceptor           |
| TCTTTGAA db/m1 | db/m | 3555 | 0.030318 | FALSE | 1.483749 | FALSE | Neuron                  |
| TCTTTGAA db/m1 | db/m | 248  | 0.044326 | FALSE | 21.08732 | TRUE  |                         |
| TCTTTGAT db/m1 | db/m | 1436 | 0.016488 | FALSE | 1.630784 | FALSE | Neuron                  |
| TGAACGT db/m1  | db/m | 1011 | 0.093319 | FALSE | 6.27451  | TRUE  |                         |
| TGAACGT db/m1  | db/m | 382  | 0.019106 | FALSE | 2.953598 | FALSE | Photoreceptor           |
| TGAACGT db/m1  | db/m | 359  | 0.046025 | FALSE | 3.638201 | FALSE | Photoreceptor           |
| TGAACGT db/m1  | db/m | 1547 | 0.049679 | FALSE | 4.272698 | FALSE | Muller cell             |

|                |      |      |          |       |          |       |                        |
|----------------|------|------|----------|-------|----------|-------|------------------------|
| TGAACGTC db/m1 | db/m | 2648 | 0.029266 | FALSE | 0.875774 | FALSE | Photoreceptor          |
| TGAACGTC db/m1 | db/m | 2973 | 0.044326 | FALSE | 1.304878 | FALSE | Microglia              |
| TGAACGTC db/m1 | db/m | 3959 | 0.021286 | FALSE | 1.205959 | FALSE | Endothelia Capillary E |
| TGAACGTC db/m1 | db/m | 4025 | 0.03313  | FALSE | 1.544729 | FALSE | Photoreceptor          |
| TGAACGTT db/m1 | db/m | 9279 | 0.015581 | FALSE | 0.792777 | FALSE | Photoreceptor          |
| TGAACGTT db/m1 | db/m | 1196 | 0.022059 | FALSE | 1.56068  | FALSE | Photoreceptor          |
| TGAATCG db/m1  | db/m | 1553 | 0.009063 | FALSE | 1.903823 | FALSE | Endothelia Capillary E |
| TGAATCG db/m1  | db/m | 557  | 0.034954 | FALSE | 4.328003 | FALSE | Muller cell            |
| TGAATCG db/m1  | db/m | 732  | 0.078788 | FALSE | 1.181175 | FALSE | Neuron                 |
| TGAATCG db/m1  | db/m | 1345 | 0.020536 | FALSE | 1.514837 | FALSE | Endothelia Capillary E |
| TGAATCG db/m1  | db/m | 1135 | 0.035586 | FALSE | 0.822628 | FALSE | Photoreceptor          |
| TGAATCG db/m1  | db/m | 6852 | 0.025416 | FALSE | 0.774949 | FALSE | Photoreceptor          |
| TGAATCGT db/m1 | db/m | 865  | 0.073582 | FALSE | 17.59494 | TRUE  |                        |
| TGAATGC db/m1  | db/m | 6657 | 0.009063 | FALSE | 0.99693  | FALSE | Photoreceptor          |
| TGAATGCC db/m1 | db/m | 1266 | 0.095727 | FALSE | 21.8507  | TRUE  |                        |
| TGAATGCC db/m1 | db/m | 2222 | 0.080645 | FALSE | 2.710521 | FALSE | Muller cell            |
| TGAATGCT db/m1 | db/m | 493  | 0.021669 | FALSE | 1.030524 | FALSE | Photoreceptor          |
| TGACAGT db/m1  | db/m | 1200 | 0.058205 | FALSE | 1.199261 | FALSE | Photoreceptor          |
| TGACAGT db/m1  | db/m | 8005 | 0.029787 | FALSE | 0.852872 | FALSE | Photoreceptor          |
| TGACAGT db/m1  | db/m | 1749 | 0.030859 | FALSE | 3.509741 | FALSE | Muller cell            |
| TGACAGT db/m1  | db/m | 498  | 0.019455 | FALSE | 4.271765 | FALSE | Muller cell            |
| TGACCCTA db/m1 | db/m | 3362 | 0.010614 | FALSE | 1.432205 | FALSE | Photoreceptor          |
| TGACCCTA db/m1 | db/m | 2843 | 0.014711 | FALSE | 1.323298 | FALSE | Endothelia Venous EC   |
| TGACCCTC db/m1 | db/m | 2190 | 0.028754 | FALSE | 1.275341 | FALSE | Photoreceptor          |
| TGACCCTC db/m1 | db/m | 8390 | 0.040404 | FALSE | 0.753403 | FALSE | Photoreceptor          |
| TGACCCTC db/m1 | db/m | 767  | 0.027273 | FALSE | 0.582283 | FALSE | Photoreceptor          |
| TGACCCTC db/m1 | db/m | 397  | 0.022059 | FALSE | 3.564756 | FALSE | Photoreceptor          |
| TGACCCTT db/m1 | db/m | 6700 | 0.010157 | FALSE | 0.947355 | FALSE | Photoreceptor          |
| TGACGCG db/m1  | db/m | 1219 | 0.038251 | FALSE | 4.109412 | FALSE | Muller cell            |
| TGACGCG db/m1  | db/m | 1108 | 0.084562 | FALSE | 2.304382 | FALSE | Photoreceptor          |
| TGACGCG db/m1  | db/m | 2277 | 0.053718 | FALSE | 1.376954 | FALSE | Photoreceptor          |
| TGACGCG db/m1  | db/m | 3161 | 0.016181 | FALSE | 1.241303 | FALSE | Photoreceptor          |
| TGACGCG db/m1  | db/m | 3259 | 0.035586 | FALSE | 1.065054 | FALSE | Neuron                 |
| TGACGCG db/m1  | db/m | 1182 | 0.070386 | FALSE | 1.19165  | FALSE | Photoreceptor          |
| TGACGCG db/m1  | db/m | 470  | 0.023266 | FALSE | 2.621142 | FALSE | Photoreceptor          |
| TGACTCCG db/m1 | db/m | 445  | 0.034334 | FALSE | 2.516289 | FALSE | Endothelia Capillary E |
| TGACTCCG db/m1 | db/m | 4544 | 0.018422 | FALSE | 0.891267 | FALSE | Photoreceptor          |
| TGACTCCG db/m1 | db/m | 566  | 0.055901 | FALSE | 10.57007 | TRUE  |                        |
| TGACTCCG db/m1 | db/m | 549  | 0.018422 | FALSE | 2.043066 | FALSE | Pericyte               |
| TGACTCCG db/m1 | db/m | 985  | 0.043505 | FALSE | 0.80276  | FALSE | Photoreceptor          |
| TGACTCCG db/m1 | db/m | 2663 | 0.016181 | FALSE | 1.318105 | FALSE | Endothelia Venous EC   |
| TGAGACT db/m1  | db/m | 4894 | 0.049679 | FALSE | 1.061923 | FALSE | Endothelia Venous EC   |
| TGAGACT db/m1  | db/m | 649  | 0.024971 | FALSE | 0.836055 | FALSE | Photoreceptor          |
| TGAGACT db/m1  | db/m | 914  | 0.038953 | FALSE | 1.200324 | FALSE | Photoreceptor          |
| TGAGACT db/m1  | db/m | 1685 | 0.055901 | FALSE | 3.019526 | FALSE | Muller cell            |
| TGAGACTT db/m1 | db/m | 4258 | 0.027273 | FALSE | 0.501811 | FALSE | Photoreceptor          |
| TGAGCAT db/m1  | db/m | 8268 | 0.013338 | FALSE | 0.646761 | FALSE | Photoreceptor          |

|                |      |      |          |       |          |       |                         |
|----------------|------|------|----------|-------|----------|-------|-------------------------|
| TGAGCAT# db/m1 | db/m | 3006 | 0.016181 | FALSE | 1.315248 | FALSE | Endothelia Venous EC    |
| TGAGCAT# db/m1 | db/m | 2025 | 0.004927 | FALSE | 1.532089 | FALSE | Neuron                  |
| TGAGCAT# db/m1 | db/m | 878  | 0.044326 | FALSE | 1.820647 | FALSE | Photoreceptor           |
| TGAGCAT# db/m1 | db/m | 4463 | 0.139562 | TRUE  | 3.19788  | FALSE |                         |
| TGAGCAT# db/m1 | db/m | 1104 | 0.008032 | FALSE | 2.026991 | FALSE | Endothelia Capillary EC |
| TGAGCAT# db/m1 | db/m | 1727 | 0.039671 | FALSE | 1.589134 | FALSE | Photoreceptor           |
| TGAGCAT# db/m1 | db/m | 3036 | 0.022455 | FALSE | 1.241238 | FALSE | Endothelia Capillary EC |
| TGAGCAT# db/m1 | db/m | 772  | 0.093319 | FALSE | 1.220011 | FALSE | Photoreceptor           |
| TGAGCGC# db/m1 | db/m | 3618 | 0.020171 | FALSE | 1.289779 | FALSE | Endothelia Venous EC    |
| TGAGCGC# db/m1 | db/m | 2363 | 0.014997 | FALSE | 1.395464 | FALSE | Photoreceptor           |
| TGAGCGC# db/m1 | db/m | 687  | 0.053718 | FALSE | 2.283686 | FALSE | Endothelia Capillary EC |
| TGAGCGC# db/m1 | db/m | 1100 | 0.037564 | FALSE | 2.138095 | FALSE | Photoreceptor           |
| TGAGCGC# db/m1 | db/m | 6337 | 0.143501 | TRUE  | 0.869281 | FALSE |                         |
| TGAGCGC# db/m1 | db/m | 1298 | 0.022059 | FALSE | 1.319044 | FALSE | Photoreceptor           |
| TGAGGAG# db/m1 | db/m | 8125 | 0.018761 | FALSE | 0.827139 | FALSE | Photoreceptor           |
| TGAGGAG# db/m1 | db/m | 5415 | 0.011805 | FALSE | 1.090168 | FALSE | Photoreceptor           |
| TGAGGAG# db/m1 | db/m | 790  | 0.029266 | FALSE | 52.79223 | TRUE  |                         |
| TGAGGAG# db/m1 | db/m | 2249 | 0.045165 | FALSE | 1.268092 | FALSE | Endothelia Capillary EC |
| TGAGGAG# db/m1 | db/m | 517  | 0.024534 | FALSE | 1.07881  | FALSE | Photoreceptor           |
| TGAGGAG# db/m1 | db/m | 2005 | 0.08663  | FALSE | 1.114122 | FALSE | Photoreceptor           |
| TGAGGAG# db/m1 | db/m | 984  | 0.032546 | FALSE | 1.630811 | FALSE | Neuron                  |
| TGAGGAG# db/m1 | db/m | 2753 | 0.082569 | FALSE | 10.40738 | TRUE  |                         |
| TGAGGAG# db/m1 | db/m | 1883 | 0.080645 | FALSE | 1.273667 | FALSE | Photoreceptor           |
| TGAGGGA# db/m1 | db/m | 2797 | 0.013074 | FALSE | 1.257006 | FALSE | Endothelia Venous EC    |
| TGAGGGA# db/m1 | db/m | 1358 | 0.039671 | FALSE | 2.191313 | FALSE | Photoreceptor           |
| TGAGGGA# db/m1 | db/m | 626  | 0.070386 | FALSE | 2.812991 | FALSE | Endothelia Capillary EC |
| TGAGGGA# db/m1 | db/m | 905  | 0.063221 | FALSE | 1.35991  | FALSE | Photoreceptor           |
| TGAGGGA# db/m1 | db/m | 1921 | 0.04192  | FALSE | 1.731313 | FALSE | Photoreceptor           |
| TGAGGGA# db/m1 | db/m | 933  | 0.036891 | FALSE | 0.662042 | FALSE | Photoreceptor           |
| TGAGGTT# db/m1 | db/m | 1859 | 0.128582 | TRUE  | 3.532182 | FALSE |                         |
| TGAGGTT# db/m1 | db/m | 561  | 0.01981  | FALSE | 2.962818 | FALSE | Endothelia Capillary EC |
| TGAGGTT# db/m1 | db/m | 2542 | 0.003649 | FALSE | 0.794788 | FALSE | Neuron                  |
| TGAGGTT# db/m1 | db/m | 2645 | 0.010614 | FALSE | 1.514197 | FALSE | Photoreceptor           |
| TGAGGTT# db/m1 | db/m | 559  | 0.038953 | FALSE | 3.222497 | FALSE | Muller cell             |
| TGAGGTT# db/m1 | db/m | 2456 | 0.052669 | FALSE | 1.896289 | FALSE | Photoreceptor           |
| TGAGGTT# db/m1 | db/m | 3939 | 0.048732 | FALSE | 1.234146 | FALSE | Photoreceptor           |
| TGAGTCA# db/m1 | db/m | 746  | 0.036891 | FALSE | 1.232176 | FALSE | Photoreceptor           |
| TGAGTCA# db/m1 | db/m | 845  | 0.067388 | FALSE | 3.558853 | FALSE | Muller cell             |
| TGAGTCA# db/m1 | db/m | 620  | 0.023266 | FALSE | 4.299016 | FALSE | Muller cell             |
| TGAGTCA# db/m1 | db/m | 557  | 0.030318 | FALSE | 1.84498  | FALSE | Photoreceptor           |
| TGAGTCA# db/m1 | db/m | 8162 | 0.018088 | FALSE | 0.849713 | FALSE | Photoreceptor           |
| TGATCAG# db/m1 | db/m | 693  | 0.020536 | FALSE | 0.50163  | FALSE | Photoreceptor           |
| TGATCAG# db/m1 | db/m | 3993 | 0.029266 | FALSE | 0.895658 | FALSE | Photoreceptor           |
| TGATCAG# db/m1 | db/m | 4489 | 0.057037 | FALSE | 1.069733 | FALSE | Photoreceptor           |
| TGATCTTC db/m1 | db/m | 773  | 0.051646 | FALSE | 1.451986 | FALSE | Photoreceptor           |
| TGATCTTC db/m1 | db/m | 539  | 0.054795 | FALSE | 3.623476 | FALSE | Muller cell             |
| TGATCTTC db/m1 | db/m | 1492 | 0.08663  | FALSE | 2.245787 | FALSE | Muller cell             |

|                |      |      |          |       |          |       |                        |
|----------------|------|------|----------|-------|----------|-------|------------------------|
| TGATCTTG db/m1 | db/m | 2447 | 0.013074 | FALSE | 1.264211 | FALSE | Endothelia Venous EC   |
| TGATCTTG db/m1 | db/m | 605  | 0.052669 | FALSE | 3.379796 | FALSE | Muller cell            |
| TGATCTTG db/m1 | db/m | 4086 | 0.040404 | FALSE | 0.983504 | FALSE | Photoreceptor          |
| TGATCTTT db/m1 | db/m | 566  | 0.016799 | FALSE | 2.310091 | FALSE | Pericyte               |
| TGATCTTT db/m1 | db/m | 1331 | 0.014711 | FALSE | 1.521021 | FALSE | Endothelia Capillary E |
| TGATGCA db/m1  | db/m | 4690 | 0.020171 | FALSE | 1.241297 | FALSE | Photoreceptor          |
| TGATGCA db/m1  | db/m | 2147 | 0.014151 | FALSE | 1.544081 | FALSE | Neuron                 |
| TGATGCA db/m1  | db/m | 3569 | 0.031411 | FALSE | 1.082253 | FALSE | Photoreceptor          |
| TGATGCA db/m1  | db/m | 1325 | 0.009933 | FALSE | 1.025914 | FALSE | Endothelia Aterial EC  |
| TGATGCA db/m1  | db/m | 2310 | 0.073582 | FALSE | 1.530039 | FALSE | Endothelia Capillary E |
| TGATGCA db/m1  | db/m | 2530 | 0.025868 | FALSE | 1.421374 | FALSE | Photoreceptor          |
| TGATGGT db/m1  | db/m | 851  | 0.046906 | FALSE | 2.351623 | FALSE | Endothelia Venous EC   |
| TGATGGT db/m1  | db/m | 2181 | 0.058205 | FALSE | 0.988934 | FALSE | Photoreceptor          |
| TGATGGT db/m1  | db/m | 3280 | 0.020908 | FALSE | 1.341392 | FALSE | Endothelia Venous EC   |
| TGATGGT db/m1  | db/m | 686  | 0.017114 | FALSE | 1.267979 | FALSE | Pericyte               |
| TGATGGT db/m1  | db/m | 902  | 0.095727 | FALSE | 1.9828   | FALSE | Photoreceptor          |
| TGATGGT db/m1  | db/m | 1587 | 0.015879 | FALSE | 1.584861 | FALSE | Neuron                 |
| TGATGGT db/m1  | db/m | 4382 | 0.028754 | FALSE | 1.159595 | FALSE | Endothelia Capillary E |
| TGATGGT db/m1  | db/m | 749  | 0.016488 | FALSE | 1.759042 | FALSE | Photoreceptor          |
| TGATGGT db/m1  | db/m | 2171 | 0.184701 | TRUE  | 8.928959 | TRUE  |                        |
| TGATTCTA db/m1 | db/m | 2153 | 0.014711 | FALSE | 1.261444 | FALSE | Endothelia Aterial EC  |
| TGATTCTC db/m1 | db/m | 3937 | 0.082569 | FALSE | 1.374691 | FALSE | Photoreceptor          |
| TGATTCTC db/m1 | db/m | 2380 | 0.030318 | FALSE | 1.33729  | FALSE | Endothelia Capillary E |
| TGATTCTC db/m1 | db/m | 422  | 0.025416 | FALSE | 0.585464 | FALSE | Photoreceptor          |
| TGATTCTG db/m1 | db/m | 955  | 0.037564 | FALSE | 1.304129 | FALSE | Photoreceptor          |
| TGATTCTG db/m1 | db/m | 3464 | 0.020171 | FALSE | 1.413542 | FALSE | Photoreceptor          |
| TGATTTCA db/m1 | db/m | 3143 | 0.019455 | FALSE | 1.515781 | FALSE | Photoreceptor          |
| TGATTTCG db/m1 | db/m | 3121 | 0.018422 | FALSE | 1.212346 | FALSE | Photoreceptor          |
| TGATTTCT db/m1 | db/m | 1429 | 0.021286 | FALSE | 1.08775  | FALSE | Photoreceptor          |
| TGATTTCT db/m1 | db/m | 1098 | 0.05065  | FALSE | 1.790768 | FALSE | Photoreceptor          |
| TGATTTCT db/m1 | db/m | 2408 | 0.057037 | FALSE | 1.531805 | FALSE | Photoreceptor          |
| TGATTTCT db/m1 | db/m | 1281 | 0.016181 | FALSE | 1.306213 | FALSE | Endothelia Capillary E |
| TGCACGG db/m1  | db/m | 4695 | 0.012557 | FALSE | 1.066692 | FALSE | Photoreceptor          |
| TGCACGG db/m1  | db/m | 476  | 0.015879 | FALSE | 1.619267 | FALSE | Photoreceptor          |
| TGCACGG db/m1  | db/m | 549  | 0.036232 | FALSE | 61.03759 | TRUE  |                        |
| TGCACGG db/m1  | db/m | 515  | 0.048732 | FALSE | 2.635119 | FALSE | Photoreceptor          |
| TGCACGG db/m1  | db/m | 2616 | 0.017758 | FALSE | 1.058469 | FALSE | Photoreceptor          |
| TGCACGG db/m1  | db/m | 349  | 0.095727 | FALSE | 3.15853  | FALSE | Pericyte               |
| TGCACGG db/m1  | db/m | 1494 | 0.012814 | FALSE | 1.094996 | FALSE | Endothelia Capillary E |
| TGCACGG db/m1  | db/m | 953  | 0.076994 | FALSE | 16.45729 | TRUE  |                        |
| TGCACGG db/m1  | db/m | 5453 | 0.029266 | FALSE | 1.110493 | FALSE | Neuron                 |
| TGCACGG db/m1  | db/m | 711  | 0.10813  | TRUE  | 3.773585 | FALSE |                        |
| TGCACGG db/m1  | db/m | 7605 | 0.027758 | FALSE | 0.97054  | FALSE | Photoreceptor          |
| TGCACGG db/m1  | db/m | 7830 | 0.029266 | FALSE | 0.821111 | FALSE | Photoreceptor          |
| TGCAGAT db/m1  | db/m | 526  | 0.073582 | FALSE | 4.50449  | FALSE | Muller cell            |
| TGCAGAT db/m1  | db/m | 2696 | 0.034334 | FALSE | 1.298103 | FALSE | Photoreceptor          |
| TGCAGAT db/m1  | db/m | 2240 | 0.08663  | FALSE | 15.2826  | TRUE  |                        |



|                |      |      |          |       |          |       |                        |
|----------------|------|------|----------|-------|----------|-------|------------------------|
| TGCAGATC db/m1 | db/m | 1639 | 0.010157 | FALSE | 1.209823 | FALSE | Endothelia Capillary E |
| TGCAGGC db/m1  | db/m | 460  | 0.042704 | FALSE | 0.768505 | FALSE | Photoreceptor          |
| TGCAGGC db/m1  | db/m | 5203 | 0.106408 | TRUE  | 5.981404 | TRUE  |                        |
| TGCATCCA db/m1 | db/m | 512  | 0.006499 | FALSE | 2.173616 | FALSE | Muller cell            |
| TGCATCCA db/m1 | db/m | 4433 | 0.184701 | TRUE  | 5.179513 | TRUE  |                        |
| TGCATCCA db/m1 | db/m | 1734 | 0.064568 | FALSE | 2.316272 | FALSE | Muller cell            |
| TGCATCCC db/m1 | db/m | 1677 | 0.055901 | FALSE | 1.780801 | FALSE | Photoreceptor          |
| TGCATCCC db/m1 | db/m | 3099 | 0.022059 | FALSE | 1.426636 | FALSE | Photoreceptor          |
| TGCATCCC db/m1 | db/m | 1382 | 0.038251 | FALSE | 1.226671 | FALSE | Photoreceptor          |
| TGCATCCC db/m1 | db/m | 1455 | 0.052669 | FALSE | 1.376577 | FALSE | Photoreceptor          |
| TGCATCCC db/m1 | db/m | 620  | 0.054795 | FALSE | 3.329486 | FALSE | Neuron                 |
| TGCATCCC db/m1 | db/m | 5950 | 0.023682 | FALSE | 1.175591 | FALSE | Photoreceptor          |
| TGCATCCT db/m1 | db/m | 6792 | 0.036891 | FALSE | 1.004921 | FALSE | Photoreceptor          |
| TGCATCCT db/m1 | db/m | 1572 | 0.016181 | FALSE | 1.448742 | FALSE | Endothelia Capillary E |
| TGCATCCT db/m1 | db/m | 1959 | 0.041154 | FALSE | 1.330935 | FALSE | Photoreceptor          |
| TGCATGA db/m1  | db/m | 1079 | 0.042704 | FALSE | 0.709701 | FALSE | Photoreceptor          |
| TGCATGA db/m1  | db/m | 4586 | 0.028251 | FALSE | 1.208342 | FALSE | Photoreceptor          |
| TGCATGA db/m1  | db/m | 1928 | 0.022059 | FALSE | 1.346632 | FALSE | Endothelia Capillary E |
| TGCATGA db/m1  | db/m | 1604 | 0.061912 | FALSE | 2.032822 | FALSE | Photoreceptor          |
| TGCATGA db/m1  | db/m | 1100 | 0.038251 | FALSE | 1.086017 | FALSE | Photoreceptor          |
| TGCATGA db/m1  | db/m | 4037 | 0.051646 | FALSE | 1.604352 | FALSE | Photoreceptor          |
| TGCATGA db/m1  | db/m | 658  | 0.039671 | FALSE | 3.239507 | FALSE | Photoreceptor          |
| TGCATGA db/m1  | db/m | 4559 | 0.026796 | FALSE | 1.009704 | FALSE | Photoreceptor          |
| TGCCGAG db/m1  | db/m | 4893 | 0.032546 | FALSE | 0.872033 | FALSE | Photoreceptor          |
| TGCCGAG db/m1  | db/m | 986  | 0.048732 | FALSE | 2.960178 | FALSE | Muller cell            |
| TGCCGAG db/m1  | db/m | 1892 | 0.012557 | FALSE | 1.185106 | FALSE | Endothelia Capillary E |
| TGCCGAG db/m1  | db/m | 978  | 0.020908 | FALSE | 1.452512 | FALSE | Photoreceptor          |
| TGCCGAG db/m1  | db/m | 842  | 0.030859 | FALSE | 2.318204 | FALSE | Photoreceptor          |
| TGCCGAG db/m1  | db/m | 7867 | 0.019455 | FALSE | 0.789717 | FALSE | Photoreceptor          |
| TGCGACG db/m1  | db/m | 503  | 0.043505 | FALSE | 2.656826 | FALSE | Photoreceptor          |
| TGCGACG db/m1  | db/m | 2855 | 0.004598 | FALSE | 1.294738 | FALSE | Neuron                 |
| TGCGACG db/m1  | db/m | 573  | 0.009493 | FALSE | 2.263522 | FALSE | Endothelia Capillary E |
| TGCGACG db/m1  | db/m | 2415 | 0.008438 | FALSE | 1.406002 | FALSE | Photoreceptor          |
| TGCGACG db/m1  | db/m | 2609 | 0.028754 | FALSE | 1.549839 | FALSE | Microglia              |
| TGCGACG db/m1  | db/m | 3292 | 0.018422 | FALSE | 1.230493 | FALSE | Endothelia Venous EC   |
| TGCGACG db/m1  | db/m | 4011 | 0.019106 | FALSE | 1.070942 | FALSE | Photoreceptor          |
| TGCGACG db/m1  | db/m | 1200 | 0.073582 | FALSE | 1.771448 | FALSE | Photoreceptor          |
| TGCGATA db/m1  | db/m | 276  | 0.042704 | FALSE | 21.76166 | TRUE  |                        |
| TGCGATA db/m1  | db/m | 4480 | 0.058205 | FALSE | 0.884106 | FALSE | Photoreceptor          |
| TGCGATA db/m1  | db/m | 388  | 0.033726 | FALSE | 3.993507 | FALSE | Muller cell            |
| TGCGATA db/m1  | db/m | 7011 | 0.018761 | FALSE | 0.881866 | FALSE | Photoreceptor          |
| TGCGATA db/m1  | db/m | 769  | 0.046025 | FALSE | 0.776967 | FALSE | Photoreceptor          |
| TGCGATA db/m1  | db/m | 6071 | 0.013876 | FALSE | 0.769422 | FALSE | Photoreceptor          |
| TGCGGCA db/m1  | db/m | 872  | 0.065957 | FALSE | 1.463266 | FALSE | Photoreceptor          |
| TGCGGCA db/m1  | db/m | 6881 | 0.046025 | FALSE | 0.993956 | FALSE | Photoreceptor          |
| TGCGGCA db/m1  | db/m | 5751 | 0.037564 | FALSE | 0.742025 | FALSE | Photoreceptor          |
| TGCGGCA db/m1  | db/m | 920  | 0.054795 | FALSE | 1.643353 | FALSE | Photoreceptor          |

|                |      |      |          |       |          |       |                        |
|----------------|------|------|----------|-------|----------|-------|------------------------|
| TGCGGGT/db/m1  | db/m | 541  | 0.024534 | FALSE | 1.689897 | FALSE | Muller cell            |
| TGCGGGT/db/m1  | db/m | 707  | 0.017434 | FALSE | 1.960257 | FALSE | Endothelia Capillary E |
| TGCGGGT/db/m1  | db/m | 348  | 0.029266 | FALSE | 28.54641 | TRUE  |                        |
| TGCGGGT/db/m1  | db/m | 1297 | 0.011081 | FALSE | 1.410967 | FALSE | Photoreceptor          |
| TGCGGGT/db/m1  | db/m | 2471 | 0.060641 | FALSE | 1.075769 | FALSE | Photoreceptor          |
| TGCGGGT/db/m1  | db/m | 8103 | 0.088776 | FALSE | 0.642166 | FALSE | Photoreceptor          |
| TGCGGGT/db/m1  | db/m | 409  | 0.016488 | FALSE | 3.56052  | FALSE | Photoreceptor          |
| TGCTCCAA db/m1 | db/m | 1448 | 0.046906 | FALSE | 1.286248 | FALSE | Photoreceptor          |
| TGCTCCAC db/m1 | db/m | 2748 | 0.014711 | FALSE | 1.051545 | FALSE | Endothelia Capillary E |
| TGCTCCAG db/m1 | db/m | 368  | 0.082569 | FALSE | 39.80447 | TRUE  |                        |
| TGCTCCAG db/m1 | db/m | 415  | 0.014997 | FALSE | 3.148014 | FALSE | Photoreceptor          |
| TGCTCCAG db/m1 | db/m | 9684 | 0.017114 | FALSE | 0.764171 | FALSE | Photoreceptor          |
| TGCTCCAG db/m1 | db/m | 1109 | 0.018761 | FALSE | 0.576707 | FALSE | Photoreceptor          |
| TGCTCCAT db/m1 | db/m | 7804 | 0.016181 | FALSE | 0.884504 | FALSE | Photoreceptor          |
| TGCTCCAT db/m1 | db/m | 6461 | 0.022455 | FALSE | 0.690699 | FALSE | Photoreceptor          |
| TGCTCCAT db/m1 | db/m | 4899 | 0.019455 | FALSE | 1.102628 | FALSE | Photoreceptor          |
| TGCTCGTA db/m1 | db/m | 1751 | 0.047807 | FALSE | 1.166538 | FALSE | Photoreceptor          |
| TGCTCGTA db/m1 | db/m | 4636 | 0.046906 | FALSE | 1.183223 | FALSE | Photoreceptor          |
| TGCTCGTC db/m1 | db/m | 2346 | 0.059406 | FALSE | 1.412759 | FALSE | Photoreceptor          |
| TGCTCGTC db/m1 | db/m | 4589 | 0.656627 | TRUE  | 4.722103 | FALSE |                        |
| TGCTCGTC db/m1 | db/m | 2350 | 0.004116 | FALSE | 1.219817 | FALSE | Neuron                 |
| TGCTCGTC db/m1 | db/m | 497  | 0.038251 | FALSE | 4.592949 | FALSE | Muller cell            |
| TGCTCGTT db/m1 | db/m | 932  | 0.021669 | FALSE | 0.927493 | FALSE | Photoreceptor          |
| TGCTCGTT db/m1 | db/m | 318  | 0.046025 | FALSE | 20.27257 | TRUE  |                        |
| TGCTGAA/db/m1  | db/m | 1802 | 0.049679 | FALSE | 1.755545 | FALSE | Endothelia Capillary E |
| TGCTGAAC db/m1 | db/m | 451  | 0.063221 | FALSE | 29.56204 | TRUE  |                        |
| TGCTGAAC db/m1 | db/m | 865  | 0.071958 | FALSE | 1.854158 | FALSE | Photoreceptor          |
| TGCTGAAC db/m1 | db/m | 5301 | 0.019106 | FALSE | 1.130843 | FALSE | Photoreceptor          |
| TGCTGAAC db/m1 | db/m | 2182 | 0.024971 | FALSE | 2.098356 | FALSE | Neuron                 |
| TGCTGAAC db/m1 | db/m | 8424 | 0.019106 | FALSE | 0.823836 | FALSE | Photoreceptor          |
| TGCTGAAT db/m1 | db/m | 5177 | 0.011319 | FALSE | 1.07916  | FALSE | Photoreceptor          |
| TGCTGAAT db/m1 | db/m | 1118 | 0.020536 | FALSE | 2.071737 | FALSE | Photoreceptor          |
| TGCTTCGA db/m1 | db/m | 1180 | 0.017434 | FALSE | 0.978785 | FALSE | Photoreceptor          |
| TGCTTCGA db/m1 | db/m | 520  | 0.109375 | TRUE  | 31.5519  | TRUE  |                        |
| TGCTTCGA db/m1 | db/m | 2178 | 0.006317 | FALSE | 1.007782 | FALSE | Neuron                 |
| TGCTTCGC db/m1 | db/m | 449  | 0.076994 | FALSE | 1.657515 | FALSE | Photoreceptor          |
| TGCTTCGC db/m1 | db/m | 576  | 0.047807 | FALSE | 2.280523 | FALSE | Photoreceptor          |
| TGCTTCGC db/m1 | db/m | 2214 | 0.067388 | FALSE | 1.436284 | FALSE | Photoreceptor          |
| TGCTTCGC db/m1 | db/m | 1218 | 0.075259 | FALSE | 1.031375 | FALSE | Photoreceptor          |
| TGCTTCGT db/m1 | db/m | 2230 | 0.014151 | FALSE | 0.882607 | FALSE | Neuron                 |
| TGCTTCGT db/m1 | db/m | 5439 | 0.040404 | FALSE | 1.121434 | FALSE | Photoreceptor          |
| TGCTTCGT db/m1 | db/m | 3074 | 0.055901 | FALSE | 1.412609 | FALSE | Photoreceptor          |
| TGCTTGCA db/m1 | db/m | 897  | 0.049679 | FALSE | 33.29949 | TRUE  |                        |
| TGCTTGCA db/m1 | db/m | 3811 | 0.055901 | FALSE | 1.238754 | FALSE | Neuron                 |
| TGCTTGCC db/m1 | db/m | 980  | 0.020908 | FALSE | 1.732891 | FALSE | Endothelia Capillary E |
| TGCTTGCC db/m1 | db/m | 1154 | 0.057037 | FALSE | 0.897268 | FALSE | Photoreceptor          |
| TGCTTGCC db/m1 | db/m | 6626 | 0.17103  | TRUE  | 4.068889 | FALSE |                        |

|                            |      |      |          |       |          |       |                        |
|----------------------------|------|------|----------|-------|----------|-------|------------------------|
| TGCTTGCC db/m1             | db/m | 416  | 0.129534 | TRUE  | 2.242991 | FALSE |                        |
| TGCTTGCC db/m1             | db/m | 744  | 0.064568 | FALSE | 1.438366 | FALSE | Photoreceptor          |
| TGGAAC <del>T</del> db/m1  | db/m | 5459 | 0.040404 | FALSE | 1.089169 | FALSE | Photoreceptor          |
| TGGAAC <del>C</del> db/m1  | db/m | 1250 | 0.040404 | FALSE | 0.755842 | FALSE | Photoreceptor          |
| TGGAAC <del>C</del> db/m1  | db/m | 1981 | 0.107997 | TRUE  | 2.618384 | FALSE |                        |
| TGGAAC <del>C</del> db/m1  | db/m | 906  | 0.030318 | FALSE | 1.029535 | FALSE | Photoreceptor          |
| TGGAAC <del>T</del> db/m1  | db/m | 1791 | 0.022059 | FALSE | 1.490229 | FALSE | Endothelia Capillary E |
| TGGAAC <del>T</del> db/m1  | db/m | 9086 | 0.029787 | FALSE | 0.739847 | FALSE | Photoreceptor          |
| TGGAGAG db/m1              | db/m | 1914 | 0.091004 | FALSE | 1.490044 | FALSE | Photoreceptor          |
| TGGAGAG db/m1              | db/m | 4582 | 0.021286 | FALSE | 1.077734 | FALSE | Photoreceptor          |
| TGGAGAG db/m1              | db/m | 2153 | 0.047807 | FALSE | 1.524475 | FALSE | Endothelia Venous EC   |
| TGGAGAG db/m1              | db/m | 476  | 0.013876 | FALSE | 3.078588 | FALSE | Pericyte               |
| TGGAGAG db/m1              | db/m | 2354 | 0.025868 | FALSE | 1.306184 | FALSE | Endothelia Venous EC   |
| TGGAGAG db/m1              | db/m | 4257 | 0.029266 | FALSE | 1.100727 | FALSE | Photoreceptor          |
| TGGAGAG db/m1              | db/m | 1838 | 0.051646 | FALSE | 1.481796 | FALSE | Photoreceptor          |
| TGGAGAG db/m1              | db/m | 7860 | 0.023266 | FALSE | 0.836157 | FALSE | Photoreceptor          |
| TGGAGAG db/m1              | db/m | 812  | 0.078788 | FALSE | 1.628276 | FALSE | Endothelia Capillary E |
| TGGAGGA db/m1              | db/m | 1798 | 0.029266 | FALSE | 1.296776 | FALSE | Photoreceptor          |
| TGGAGGA db/m1              | db/m | 8598 | 0.013605 | FALSE | 0.982369 | FALSE | Photoreceptor          |
| TGGAGGA db/m1              | db/m | 3140 | 0.01981  | FALSE | 1.224917 | FALSE | Photoreceptor          |
| TGGAGGA db/m1              | db/m | 4367 | 0.016799 | FALSE | 1.164938 | FALSE | Photoreceptor          |
| TGGAGGA db/m1              | db/m | 1276 | 0.038251 | FALSE | 1.504476 | FALSE | Photoreceptor          |
| TGGAGGA db/m1              | db/m | 2556 | 0.070386 | FALSE | 1.104898 | FALSE | Photoreceptor          |
| TGGAGGA db/m1              | db/m | 408  | 0.103567 | TRUE  | 14.45578 | TRUE  |                        |
| TGGAGGA db/m1              | db/m | 520  | 0.054795 | FALSE | 17.53112 | TRUE  |                        |
| TGGATCA <del>T</del> db/m1 | db/m | 1696 | 0.018422 | FALSE | 1.40524  | FALSE | Endothelia Capillary E |
| TGGATCA <del>T</del> db/m1 | db/m | 2280 | 0.098234 | FALSE | 1.728285 | FALSE | Pericyte               |
| TGGATCA <del>C</del> db/m1 | db/m | 1541 | 0.061912 | FALSE | 1.356859 | FALSE | Photoreceptor          |
| TGGATCA <del>C</del> db/m1 | db/m | 752  | 0.024971 | FALSE | 2.324111 | FALSE | Photoreceptor          |
| TGGATGT <del>T</del> db/m1 | db/m | 3688 | 0.032546 | FALSE | 1.05504  | FALSE | Photoreceptor          |
| TGGATGT <del>T</del> db/m1 | db/m | 331  | 0.068864 | FALSE | 4.987378 | FALSE | Muller cell            |
| TGGATGT <del>T</del> db/m1 | db/m | 6068 | 0.025868 | FALSE | 1.029044 | FALSE | Photoreceptor          |
| TGGATGT <del>C</del> db/m1 | db/m | 1602 | 0.054795 | FALSE | 2.530696 | FALSE | Muller cell            |
| TGGATGT <del>C</del> db/m1 | db/m | 939  | 0.021669 | FALSE | 6.137931 | TRUE  |                        |
| TGGATGT <del>C</del> db/m1 | db/m | 442  | 0.01981  | FALSE | 0.964686 | FALSE | Photoreceptor          |
| TGGATGT <del>C</del> db/m1 | db/m | 3408 | 0.026796 | FALSE | 1.041883 | FALSE | Endothelia Capillary E |
| TGGATGT <del>C</del> db/m1 | db/m | 3967 | 0.008438 | FALSE | 1.593761 | FALSE | Photoreceptor          |
| TGGATGT <del>C</del> db/m1 | db/m | 5425 | 0.013074 | FALSE | 1.174211 | FALSE | Photoreceptor          |
| TGGATGT <del>C</del> db/m1 | db/m | 1588 | 0.006499 | FALSE | 1.538543 | FALSE | Pericyte               |
| TGGCGTG db/m1              | db/m | 670  | 0.027758 | FALSE | 3.722231 | FALSE | Muller cell            |
| TGGGAAG db/m1              | db/m | 2396 | 0.012557 | FALSE | 1.013396 | FALSE | Endothelia Aterial EC  |
| TGGGAAG db/m1              | db/m | 2641 | 0.080645 | FALSE | 1.888743 | FALSE | Photoreceptor          |
| TGGGAAG db/m1              | db/m | 676  | 0.033726 | FALSE | 1.264508 | FALSE | Photoreceptor          |
| TGGGAAG db/m1              | db/m | 749  | 0.053718 | FALSE | 1.318429 | FALSE | Photoreceptor          |
| TGGGAAG db/m1              | db/m | 421  | 0.022455 | FALSE | 2.670781 | FALSE | Photoreceptor          |
| TGGGAAG db/m1              | db/m | 2061 | 0.209157 | TRUE  | 9.893238 | TRUE  |                        |
| TGGGAAG db/m1              | db/m | 1771 | 0.036891 | FALSE | 0.543616 | FALSE | Photoreceptor          |

|               |      |      |          |       |          |       |                        |
|---------------|------|------|----------|-------|----------|-------|------------------------|
| TGGGAAG db/m1 | db/m | 1816 | 0.018761 | FALSE | 1.076352 | FALSE | Endothelia Capillary E |
| TGGGAAG db/m1 | db/m | 2617 | 0.08663  | FALSE | 1.291188 | FALSE | Endothelia Venous EC   |
| TGGGAGA db/m1 | db/m | 1501 | 0.03313  | FALSE | 1.647349 | FALSE | Endothelia Capillary E |
| TGGGAGA db/m1 | db/m | 2622 | 0.010384 | FALSE | 1.157588 | FALSE | Endothelia Venous EC   |
| TGGGAGA db/m1 | db/m | 5903 | 0.023266 | FALSE | 1.116583 | FALSE | Photoreceptor          |
| TGGGAGA db/m1 | db/m | 7204 | 0.012303 | FALSE | 0.882522 | FALSE | Photoreceptor          |
| TGGGAGA db/m1 | db/m | 561  | 0.038251 | FALSE | 4.042071 | FALSE | Muller cell            |
| TGGGAGA db/m1 | db/m | 4457 | 0.159016 | TRUE  | 12.13607 | TRUE  |                        |
| TGGGATT db/m1 | db/m | 636  | 0.024971 | FALSE | 0.480389 | FALSE | Photoreceptor          |
| TGGGATT db/m1 | db/m | 1001 | 0.060641 | FALSE | 12.04218 | TRUE  |                        |
| TGGGATT db/m1 | db/m | 749  | 0.017758 | FALSE | 4.317841 | FALSE | Muller cell            |
| TGGGATT db/m1 | db/m | 1048 | 0.039671 | FALSE | 1.407776 | FALSE | Photoreceptor          |
| TGGGATT db/m1 | db/m | 3771 | 0.032546 | FALSE | 0.769164 | FALSE | Photoreceptor          |
| TGGGATT db/m1 | db/m | 1754 | 0.357022 | TRUE  | 7.756232 | TRUE  |                        |
| TGGGCGT db/m1 | db/m | 1816 | 0.011319 | FALSE | 1.248364 | FALSE | Endothelia Capillary E |
| TGGGCGT db/m1 | db/m | 500  | 0.034954 | FALSE | 0.286437 | FALSE | Photoreceptor          |
| TGGGCGT db/m1 | db/m | 708  | 0.252153 | TRUE  | 7.941177 | TRUE  |                        |
| TGGGCGT db/m1 | db/m | 4022 | 0.016799 | FALSE | 1.023945 | FALSE | Endothelia Capillary E |
| TGGGCGT db/m1 | db/m | 1171 | 0.080645 | FALSE | 5.87918  | TRUE  |                        |
| TGGGCGT db/m1 | db/m | 1339 | 0.029787 | FALSE | 1.954848 | FALSE | Pericyte               |
| TGGGCGT db/m1 | db/m | 2614 | 0.112037 | TRUE  | 3.952496 | FALSE |                        |
| TGGGCGT db/m1 | db/m | 418  | 0.016799 | FALSE | 4.390263 | FALSE | Endothelia Aterial EC  |
| TGGGCTG db/m1 | db/m | 7277 | 0.029787 | FALSE | 0.783901 | FALSE | Photoreceptor          |
| TGGGCTG db/m1 | db/m | 2203 | 0.093319 | FALSE | 15.09355 | TRUE  |                        |
| TGGGCTG db/m1 | db/m | 597  | 0.018422 | FALSE | 3.795846 | FALSE | Muller cell            |
| TGGGCTG db/m1 | db/m | 1044 | 0.021669 | FALSE | 1.297237 | FALSE | Photoreceptor          |
| TGGGCTG db/m1 | db/m | 1041 | 0.027273 | FALSE | 1.579985 | FALSE | Photoreceptor          |
| TGGGCTG db/m1 | db/m | 883  | 0.034334 | FALSE | 1.506583 | FALSE | Photoreceptor          |
| TGGGCTG db/m1 | db/m | 3073 | 0.048732 | FALSE | 1.125258 | FALSE | Endothelia Venous EC   |
| TGGGCTG db/m1 | db/m | 991  | 0.015879 | FALSE | 0.745246 | FALSE | Photoreceptor          |
| TGGGCTG db/m1 | db/m | 1016 | 0.04192  | FALSE | 0.841421 | FALSE | Photoreceptor          |
| TGGGCTG db/m1 | db/m | 914  | 0.017114 | FALSE | 0.625441 | FALSE | Photoreceptor          |
| TGGGCTG db/m1 | db/m | 1411 | 0.131994 | TRUE  | 3.651904 | FALSE |                        |
| TGGGCTG db/m1 | db/m | 3460 | 0.150727 | TRUE  | 3.731936 | FALSE |                        |
| TGGGCTG db/m1 | db/m | 3525 | 0.103567 | TRUE  | 2.687494 | FALSE |                        |
| TGGGTTA db/m1 | db/m | 4467 | 0.03313  | FALSE | 1.188558 | FALSE | Endothelia Venous EC   |
| TGGGTTA db/m1 | db/m | 1359 | 0.115641 | TRUE  | 2.600897 | FALSE |                        |
| TGGGTTA db/m1 | db/m | 884  | 0.058205 | FALSE | 1.806947 | FALSE | Photoreceptor          |
| TGGGTTA db/m1 | db/m | 3812 | 0.023682 | FALSE | 1.172761 | FALSE | Endothelia Venous EC   |
| TGGGTTA db/m1 | db/m | 1806 | 0.020536 | FALSE | 1.934831 | FALSE | Endothelia Aterial EC  |
| TGGGTTA db/m1 | db/m | 8880 | 0.023682 | FALSE | 0.725641 | FALSE | Photoreceptor          |
| TGGGTTA db/m1 | db/m | 4601 | 0.061912 | FALSE | 1.272899 | FALSE | Photoreceptor          |
| TGGGTTA db/m1 | db/m | 7081 | 0.018761 | FALSE | 1.038893 | FALSE | Photoreceptor          |
| TGGGTTA db/m1 | db/m | 798  | 0.095727 | FALSE | 2.588007 | FALSE | Muller cell            |
| TGGGTTA db/m1 | db/m | 2102 | 0.040404 | FALSE | 1.401338 | FALSE | Photoreceptor          |
| TGGGTTA db/m1 | db/m | 1650 | 0.082569 | FALSE | 1.441608 | FALSE | Endothelia Capillary E |
| TGGTACA db/m1 | db/m | 1185 | 0.046906 | FALSE | 0.917556 | FALSE | Photoreceptor          |

|                |      |      |          |       |          |       |                        |
|----------------|------|------|----------|-------|----------|-------|------------------------|
| TGGTACAC db/m1 | db/m | 440  | 0.025868 | FALSE | 2.885528 | FALSE | Photoreceptor          |
| TGGTACAC db/m1 | db/m | 1937 | 0.024534 | FALSE | 1.443785 | FALSE | Endothelia Capillary E |
| TGGTACAT db/m1 | db/m | 2590 | 0.008032 | FALSE | 1.169947 | FALSE | Endothelia Venous EC   |
| TGGTACAT db/m1 | db/m | 1382 | 0.027273 | FALSE | 2.362508 | FALSE | Neuron                 |
| TGGTAGT db/m1  | db/m | 7441 | 0.021669 | FALSE | 0.671283 | FALSE | Photoreceptor          |
| TGGTAGT db/m1  | db/m | 6772 | 0.048732 | FALSE | 1.130173 | FALSE | Photoreceptor          |
| TGGTAGTC db/m1 | db/m | 2069 | 0.027758 | FALSE | 2.040402 | FALSE | Neuron                 |
| TGGTAGTT db/m1 | db/m | 713  | 0.029787 | FALSE | 2.215987 | FALSE | Endothelia Capillary E |
| TGGTAGTT db/m1 | db/m | 4723 | 0.022059 | FALSE | 1.222005 | FALSE | Photoreceptor          |
| TGGTAGTT db/m1 | db/m | 488  | 0.014711 | FALSE | 0.727999 | FALSE | Photoreceptor          |
| TGGTGAT db/m1  | db/m | 2685 | 0.026328 | FALSE | 0.869707 | FALSE | Photoreceptor          |
| TGGTGAT db/m1  | db/m | 6096 | 0.006137 | FALSE | 0.996393 | FALSE | Photoreceptor          |
| TGGTGATC db/m1 | db/m | 1797 | 0.08663  | FALSE | 1.315476 | FALSE | Photoreceptor          |
| TGGTGATC db/m1 | db/m | 3937 | 0.040404 | FALSE | 1.148245 | FALSE | Neuron                 |
| TGGTGATC db/m1 | db/m | 6496 | 0.018088 | FALSE | 0.755988 | FALSE | Photoreceptor          |
| TGGTGATC db/m1 | db/m | 673  | 0.059406 | FALSE | 1.629702 | FALSE | Photoreceptor          |
| TGGTGATC db/m1 | db/m | 2799 | 0.005958 | FALSE | 1.258545 | FALSE | Neuron                 |
| TGGTGATT db/m1 | db/m | 1108 | 0.088776 | FALSE | 3.311177 | FALSE | Photoreceptor          |
| TGGTGATT db/m1 | db/m | 791  | 0.063221 | FALSE | 1.178242 | FALSE | Photoreceptor          |
| TGGTTAGC db/m1 | db/m | 1924 | 0.071958 | FALSE | 1.495091 | FALSE | Endothelia Capillary E |
| TGGTTAGC db/m1 | db/m | 520  | 0.016488 | FALSE | 2.726217 | FALSE | Photoreceptor          |
| TGGTTAGC db/m1 | db/m | 3598 | 0.061912 | FALSE | 1.168292 | FALSE | Neuron                 |
| TGGTTAGC db/m1 | db/m | 951  | 0.044326 | FALSE | 4.034822 | FALSE | Muller cell            |
| TGGTTAGC db/m1 | db/m | 4748 | 0.028251 | FALSE | 0.980269 | FALSE | Endothelia Venous EC   |
| TGGTTAGT db/m1 | db/m | 2755 | 0.065957 | FALSE | 0.970158 | FALSE | Microglia              |
| TGGTTAGT db/m1 | db/m | 1507 | 0.033726 | FALSE | 1.130015 | FALSE | Photoreceptor          |
| TGGTTAGT db/m1 | db/m | 4572 | 0.04192  | FALSE | 1.039641 | FALSE | Photoreceptor          |
| TGGTTAGT db/m1 | db/m | 2436 | 0.057037 | FALSE | 1.582135 | FALSE | Photoreceptor          |
| TGTAACG db/m1  | db/m | 1533 | 0.029787 | FALSE | 2.012629 | FALSE | Endothelia Capillary E |
| TGTAACGC db/m1 | db/m | 1593 | 0.041154 | FALSE | 1.009349 | FALSE | Photoreceptor          |
| TGTAACGC db/m1 | db/m | 5233 | 0.026328 | FALSE | 0.423959 | FALSE | Photoreceptor          |
| TGTAACGC db/m1 | db/m | 1537 | 0.017434 | FALSE | 2.041449 | FALSE | Endothelia Capillary E |
| TGTAACGC db/m1 | db/m | 3261 | 0.017758 | FALSE | 1.135768 | FALSE | Photoreceptor          |
| TGTAACGT db/m1 | db/m | 5781 | 0.08663  | FALSE | 1.189748 | FALSE | Photoreceptor          |
| TGTAACGT db/m1 | db/m | 4098 | 0.018761 | FALSE | 1.056359 | FALSE | Photoreceptor          |
| TGTAAGC db/m1  | db/m | 450  | 0.036891 | FALSE | 4.656703 | FALSE | Muller cell            |
| TGTAAGC db/m1  | db/m | 699  | 0.023266 | FALSE | 3.97876  | FALSE | Muller cell            |
| TGTAAGC db/m1  | db/m | 2815 | 0.008644 | FALSE | 1.311568 | FALSE | Neuron                 |
| TGTAAGC db/m1  | db/m | 3025 | 0.037564 | FALSE | 1.665131 | FALSE | Neuron                 |
| TGTAAGCC db/m1 | db/m | 3079 | 0.012814 | FALSE | 1.12708  | FALSE | Photoreceptor          |
| TGTAAGCC db/m1 | db/m | 2431 | 0.005435 | FALSE | 0.9537   | FALSE | Neuron                 |
| TGTAAGCC db/m1 | db/m | 830  | 0.033726 | FALSE | 53.97995 | TRUE  |                        |
| TGTAAGCT db/m1 | db/m | 1001 | 0.038953 | FALSE | 1.522563 | FALSE | Photoreceptor          |
| TGTAAGCT db/m1 | db/m | 1663 | 0.016799 | FALSE | 1.506939 | FALSE | Endothelia Capillary E |
| TGTACAG db/m1  | db/m | 915  | 0.016799 | FALSE | 4.210241 | FALSE | Muller cell            |
| TGTACAG db/m1  | db/m | 1136 | 0.024534 | FALSE | 2.052119 | FALSE | Endothelia Capillary E |
| TGTACAGC db/m1 | db/m | 1579 | 0.100845 | TRUE  | 4.070201 | FALSE |                        |

|                |      |      |          |       |          |       |                        |
|----------------|------|------|----------|-------|----------|-------|------------------------|
| TGTACAGC db/m1 | db/m | 796  | 0.004116 | FALSE | 2.188735 | FALSE | Pericyte               |
| TGTACAGC db/m1 | db/m | 1793 | 0.04192  | FALSE | 1.462137 | FALSE | Endothelia Venous EC   |
| TGTACAGT db/m1 | db/m | 455  | 0.027758 | FALSE | 1.448812 | FALSE | Photoreceptor          |
| TGTAGAC/ db/m1 | db/m | 7337 | 0.007833 | FALSE | 0.850798 | FALSE | Photoreceptor          |
| TGTAGAC/ db/m1 | db/m | 1380 | 0.030859 | FALSE | 0.832013 | FALSE | Photoreceptor          |
| TGTAGAC/ db/m1 | db/m | 635  | 0.010614 | FALSE | 1.687641 | FALSE | Photoreceptor          |
| TGTAGAC/ db/m1 | db/m | 1008 | 0.095727 | FALSE | 3.487566 | FALSE | Muller cell            |
| TGTAGACC db/m1 | db/m | 754  | 0.042704 | FALSE | 51.03946 | TRUE  |                        |
| TGTAGACC db/m1 | db/m | 565  | 0.061912 | FALSE | 47.72881 | TRUE  |                        |
| TGTAGACC db/m1 | db/m | 5125 | 0.013074 | FALSE | 1.068602 | FALSE | Photoreceptor          |
| TGTAGACT db/m1 | db/m | 2337 | 0.032546 | FALSE | 1.927593 | FALSE | Endothelia Aterial EC  |
| TGTCAGAC db/m1 | db/m | 3179 | 0.119256 | TRUE  | 3.98449  | FALSE |                        |
| TGTCAGAC db/m1 | db/m | 7951 | 0.076994 | FALSE | 0.781398 | FALSE | Photoreceptor          |
| TGTCAGAT db/m1 | db/m | 7229 | 0.008438 | FALSE | 1.015112 | FALSE | Photoreceptor          |
| TGTCCACA db/m1 | db/m | 7123 | 0.04192  | FALSE | 0.885039 | FALSE | Photoreceptor          |
| TGTCCACA db/m1 | db/m | 814  | 0.053718 | FALSE | 1.741037 | FALSE | Photoreceptor          |
| TGTCCACC db/m1 | db/m | 2433 | 0.046025 | FALSE | 1.063286 | FALSE | Photoreceptor          |
| TGTCCACC db/m1 | db/m | 1641 | 0.060641 | FALSE | 1.216197 | FALSE | Photoreceptor          |
| TGTCCACC db/m1 | db/m | 902  | 0.04192  | FALSE | 1.147239 | FALSE | Photoreceptor          |
| TGTCCACT db/m1 | db/m | 393  | 0.082569 | FALSE | 2.892172 | FALSE | Endothelia Capillary E |
| TGTCCACT db/m1 | db/m | 1000 | 0.036891 | FALSE | 1.999005 | FALSE | Photoreceptor          |
| TGTCCACT db/m1 | db/m | 467  | 0.039671 | FALSE | 4.112381 | FALSE | Muller cell            |
| TGTCCACT db/m1 | db/m | 1528 | 0.019106 | FALSE | 0.631874 | FALSE | Photoreceptor          |
| TGTCCCAC db/m1 | db/m | 738  | 0.037564 | FALSE | 2.014676 | FALSE | Photoreceptor          |
| TGTCCCAC db/m1 | db/m | 990  | 0.05065  | FALSE | 0.403799 | FALSE | Photoreceptor          |
| TGTCCCAG db/m1 | db/m | 390  | 0.044326 | FALSE | 46.98276 | TRUE  |                        |
| TGTCCCAG db/m1 | db/m | 364  | 0.031411 | FALSE | 3.076555 | FALSE | Endothelia Capillary E |
| TGTCCCAG db/m1 | db/m | 3217 | 0.005264 | FALSE | 1.206165 | FALSE | Neuron                 |
| TGTCCCAG db/m1 | db/m | 968  | 0.068864 | FALSE | 2.000147 | FALSE | Photoreceptor          |
| TGTCCCAT db/m1 | db/m | 7784 | 0.023682 | FALSE | 0.79364  | FALSE | Photoreceptor          |
| TGTCCTGA db/m1 | db/m | 2355 | 0.093319 | FALSE | 1.759989 | FALSE | Endothelia Capillary E |
| TGTCCTGC db/m1 | db/m | 1156 | 0.029266 | FALSE | 2.186667 | FALSE | Pericyte               |
| TGTGAGT/ db/m1 | db/m | 1010 | 0.013074 | FALSE | 1.884592 | FALSE | Endothelia Capillary E |
| TGTGAGT/ db/m1 | db/m | 886  | 0.14163  | TRUE  | 3.846154 | FALSE |                        |
| TGTGAGTC db/m1 | db/m | 556  | 0.031411 | FALSE | 1.059526 | FALSE | Microglia              |
| TGTGAGTC db/m1 | db/m | 5558 | 0.009277 | FALSE | 1.034513 | FALSE | Photoreceptor          |
| TGTGAGTC db/m1 | db/m | 683  | 0.148377 | TRUE  | 29.43013 | TRUE  |                        |
| TGTGAGTC db/m1 | db/m | 1125 | 0.045165 | FALSE | 2.094383 | FALSE | Photoreceptor          |
| TGTGAGTC db/m1 | db/m | 526  | 0.055901 | FALSE | 0.520785 | FALSE | Neuron                 |
| TGTGAGTC db/m1 | db/m | 3593 | 0.027273 | FALSE | 1.062592 | FALSE | Endothelia Capillary E |
| TGTGAGTC db/m1 | db/m | 1994 | 0.064568 | FALSE | 1.09693  | FALSE | Photoreceptor          |
| TGTGATG/ db/m1 | db/m | 2189 | 0.004436 | FALSE | 1.871416 | FALSE | Neuron                 |
| TGTGATG/ db/m1 | db/m | 2831 | 0.057037 | FALSE | 0.880822 | FALSE | Photoreceptor          |
| TGTGATGC db/m1 | db/m | 1985 | 0.013338 | FALSE | 1.379861 | FALSE | Pericyte               |
| TGTGATGC db/m1 | db/m | 5821 | 0.055901 | FALSE | 0.898952 | FALSE | Endothelia Venous EC   |
| TGTGATGC db/m1 | db/m | 7332 | 0.047807 | FALSE | 0.690366 | FALSE | Photoreceptor          |
| TGTGATGC db/m1 | db/m | 4395 | 0.073582 | FALSE | 1.107296 | FALSE | Endothelia Venous EC   |

|                 |      |      |          |       |          |       |                        |
|-----------------|------|------|----------|-------|----------|-------|------------------------|
| TGTGATG db/m1   | db/m | 631  | 0.005435 | FALSE | 1.404176 | FALSE | Endothelia Capillary E |
| TGTGATG db/m1   | db/m | 2094 | 0.093319 | FALSE | 2.250182 | FALSE | Muller cell            |
| TGTGATG db/m1   | db/m | 2142 | 0.047807 | FALSE | 1.505479 | FALSE | Photoreceptor          |
| TGTGCGG db/m1   | db/m | 1213 | 0.058205 | FALSE | 2.134783 | FALSE | Photoreceptor          |
| TGTGCGG db/m1   | db/m | 1066 | 0.037564 | FALSE | 1.146353 | FALSE | Photoreceptor          |
| TGTGCGG db/m1   | db/m | 1308 | 0.091004 | FALSE | 1.747408 | FALSE | Endothelia Capillary E |
| TGTGCGG db/m1   | db/m | 648  | 0.075259 | FALSE | 23.61111 | TRUE  |                        |
| TGTGCGG db/m1   | db/m | 861  | 0.019455 | FALSE | 3.999902 | FALSE | Muller cell            |
| TGTGCGG db/m1   | db/m | 408  | 0.017114 | FALSE | 2.02361  | FALSE | Photoreceptor          |
| TGTGCGG db/m1   | db/m | 1444 | 0.03313  | FALSE | 0.924291 | FALSE | Photoreceptor          |
| TGTGGCG db/m1   | db/m | 2661 | 0.046906 | FALSE | 1.057132 | FALSE | Photoreceptor          |
| TGTGGCG db/m1   | db/m | 2340 | 0.038953 | FALSE | 2.048011 | FALSE | Neuron                 |
| TGTGGCG db/m1   | db/m | 462  | 0.024971 | FALSE | 1.417556 | FALSE | Photoreceptor          |
| TGTGGCG db/m1   | db/m | 495  | 0.032546 | FALSE | 1.210553 | FALSE | Photoreceptor          |
| TGTGGCG db/m1   | db/m | 3137 | 0.076994 | FALSE | 8.196953 | TRUE  |                        |
| TGTGGCG db/m1   | db/m | 5763 | 0.030859 | FALSE | 1.05901  | FALSE | Endothelia Venous EC   |
| TGTGGCG db/m1   | db/m | 521  | 0.075259 | FALSE | 52.15054 | TRUE  |                        |
| TGTGGCG db/m1   | db/m | 2857 | 0.017758 | FALSE | 1.338003 | FALSE | Endothelia Capillary E |
| TGTGGCG db/m1   | db/m | 1999 | 0.041154 | FALSE | 1.436621 | FALSE | Photoreceptor          |
| TGTGTGA db/m1   | db/m | 2841 | 0.017758 | FALSE | 1.168716 | FALSE | Endothelia Capillary E |
| TGTGTGA db/m1   | db/m | 1368 | 0.039671 | FALSE | 1.407724 | FALSE | Photoreceptor          |
| TGTGTGA db/m1   | db/m | 2080 | 0.029787 | FALSE | 1.190092 | FALSE | Microglia              |
| TGTGTGA db/m1   | db/m | 941  | 0.046025 | FALSE | 2.021214 | FALSE | Photoreceptor          |
| TGTGTGA db/m1   | db/m | 6222 | 0.025416 | FALSE | 0.86701  | FALSE | Photoreceptor          |
| TGTTACTA db/m1  | db/m | 4391 | 0.043505 | FALSE | 0.96062  | FALSE | Photoreceptor          |
| TGTTACTA db/m1  | db/m | 362  | 0.046025 | FALSE | 3.121891 | FALSE | Endothelia Capillary E |
| TGTTACTC db/m1  | db/m | 719  | 0.014997 | FALSE | 1.392925 | FALSE | Photoreceptor          |
| TGTTACTG db/m1  | db/m | 1515 | 0.01981  | FALSE | 1.497951 | FALSE | Endothelia Capillary E |
| TGTTACTT db/m1  | db/m | 5735 | 0.044326 | FALSE | 1.042037 | FALSE | Photoreceptor          |
| TG TTCATC db/m1 | db/m | 2645 | 0.055901 | FALSE | 1.101628 | FALSE | Photoreceptor          |
| TG TTCATC db/m1 | db/m | 366  | 0.034954 | FALSE | 2.438902 | FALSE | Endothelia Capillary E |
| TG TTCATC db/m1 | db/m | 479  | 0.04192  | FALSE | 1.477956 | FALSE | Photoreceptor          |
| TG TTCATG db/m1 | db/m | 1014 | 0.024971 | FALSE | 2.104536 | FALSE | Photoreceptor          |
| TG TTCATT db/m1 | db/m | 1553 | 0.011561 | FALSE | 1.511281 | FALSE | Endothelia Capillary E |
| TG TTCATT db/m1 | db/m | 880  | 0.047807 | FALSE | 52.0924  | TRUE  |                        |
| TG TTCCGA db/m1 | db/m | 1059 | 0.052669 | FALSE | 2.351097 | FALSE | Photoreceptor          |
| TG TTCCGA db/m1 | db/m | 1236 | 0.013074 | FALSE | 1.690776 | FALSE | Endothelia Aterial EC  |
| TG TTCCGC db/m1 | db/m | 428  | 0.022857 | FALSE | 2.392171 | FALSE | Photoreceptor          |
| TG TTCCGC db/m1 | db/m | 667  | 0.052669 | FALSE | 1.433753 | FALSE | Photoreceptor          |
| TG TTCCGC db/m1 | db/m | 1105 | 0.023682 | FALSE | 2.089479 | FALSE | Endothelia Capillary E |
| TG TTCCGC db/m1 | db/m | 1148 | 0.017434 | FALSE | 1.756336 | FALSE | Endothelia Capillary E |
| TG TTCCGC db/m1 | db/m | 1842 | 0.052669 | FALSE | 1.480849 | FALSE | Photoreceptor          |
| TG TTCTAA db/m1 | db/m | 3035 | 0.022455 | FALSE | 1.106234 | FALSE | Endothelia Venous EC   |
| TG TTCTAA db/m1 | db/m | 2477 | 0.03313  | FALSE | 1.137809 | FALSE | Photoreceptor          |
| TG TTCTAC db/m1 | db/m | 3107 | 0.015287 | FALSE | 0.487419 | FALSE | Photoreceptor          |
| TG TTCTAC db/m1 | db/m | 1535 | 0.011319 | FALSE | 1.4187   | FALSE | Endothelia Capillary E |
| TG TTGAG db/m1  | db/m | 6721 | 0.017758 | FALSE | 0.74498  | FALSE | Photoreceptor          |

|                |      |      |          |       |          |       |                        |
|----------------|------|------|----------|-------|----------|-------|------------------------|
| TGTTGAGC db/m1 | db/m | 3957 | 0.041154 | FALSE | 1.095901 | FALSE | Photoreceptor          |
| TGTTGAGC db/m1 | db/m | 725  | 0.027273 | FALSE | 1.131336 | FALSE | Photoreceptor          |
| TGTTGAGC db/m1 | db/m | 3441 | 0.044326 | FALSE | 1.036137 | FALSE | Neuron                 |
| TGTTGAGC db/m1 | db/m | 757  | 0.037564 | FALSE | 0.595316 | FALSE | Photoreceptor          |
| TGTTGGA db/m1  | db/m | 7826 | 0.011319 | FALSE | 0.840922 | FALSE | Photoreceptor          |
| TGTTGGAC db/m1 | db/m | 3292 | 0.059406 | FALSE | 1.190081 | FALSE | Photoreceptor          |
| TGTTGGAC db/m1 | db/m | 390  | 0.038953 | FALSE | 2.958133 | FALSE | Muller cell            |
| TGTTGGAC db/m1 | db/m | 2390 | 0.024971 | FALSE | 1.623563 | FALSE | Endothelia Venous EC   |
| TGTTGGAC db/m1 | db/m | 3814 | 0.148377 | TRUE  | 4.012539 | FALSE |                        |
| TGTTGGA db/m1  | db/m | 397  | 0.046906 | FALSE | 3.506853 | FALSE | Muller cell            |
| TGTTGGA db/m1  | db/m | 3748 | 0.035586 | FALSE | 1.585085 | FALSE | Photoreceptor          |
| TGTTTGTA db/m1 | db/m | 3618 | 0.055901 | FALSE | 1.26719  | FALSE | Endothelia Venous EC   |
| TGTTTGTG db/m1 | db/m | 506  | 0.042704 | FALSE | 40.82492 | TRUE  |                        |
| TGTTTGTG db/m1 | db/m | 787  | 0.059406 | FALSE | 21.55732 | TRUE  |                        |
| TTAATCCA db/m1 | db/m | 2842 | 0.017114 | FALSE | 1.139616 | FALSE | Endothelia Venous EC   |
| TTAATCCA db/m1 | db/m | 732  | 0.019106 | FALSE | 2.35843  | FALSE | Endothelia Capillary E |
| TTAATCCC db/m1 | db/m | 1414 | 0.028754 | FALSE | 2.244516 | FALSE | Endothelia Capillary E |
| TTAATCCC db/m1 | db/m | 1123 | 0.023266 | FALSE | 0.784156 | FALSE | Photoreceptor          |
| TTAATCCG db/m1 | db/m | 1214 | 0.016799 | FALSE | 1.086408 | FALSE | Photoreceptor          |
| TTACAGG db/m1  | db/m | 1015 | 0.036891 | FALSE | 1.285281 | FALSE | Photoreceptor          |
| TTACAGG db/m1  | db/m | 1817 | 0.014711 | FALSE | 1.49782  | FALSE | Endothelia Capillary E |
| TTACAGG db/m1  | db/m | 753  | 0.034334 | FALSE | 0.917301 | FALSE | Photoreceptor          |
| TTACAGG db/m1  | db/m | 2147 | 0.024534 | FALSE | 1.369899 | FALSE | Endothelia Capillary E |
| TTACAGG db/m1  | db/m | 1529 | 0.095727 | FALSE | 1.572823 | FALSE | Photoreceptor          |
| TTACAGG db/m1  | db/m | 6289 | 0.014151 | FALSE | 0.87103  | FALSE | Photoreceptor          |
| TTACAGG db/m1  | db/m | 845  | 0.036232 | FALSE | 1.132323 | FALSE | Photoreceptor          |
| TTACCATA db/m1 | db/m | 805  | 0.091004 | FALSE | 7.079646 | TRUE  |                        |
| TTACCATA db/m1 | db/m | 7272 | 0.008438 | FALSE | 0.83916  | FALSE | Photoreceptor          |
| TTACCATC db/m1 | db/m | 953  | 0.031411 | FALSE | 1.068084 | FALSE | Photoreceptor          |
| TTACCATC db/m1 | db/m | 719  | 0.042704 | FALSE | 2.276192 | FALSE | Neuron                 |
| TTACCATG db/m1 | db/m | 6806 | 0.014151 | FALSE | 0.926059 | FALSE | Photoreceptor          |
| TTACCATG db/m1 | db/m | 888  | 0.033726 | FALSE | 0.454779 | FALSE | Photoreceptor          |
| TTACCATT db/m1 | db/m | 2350 | 0.013338 | FALSE | 0.531623 | FALSE | Photoreceptor          |
| TTACCGCA db/m1 | db/m | 516  | 0.015287 | FALSE | 1.43033  | FALSE | Photoreceptor          |
| TTACCGCC db/m1 | db/m | 1671 | 0.013338 | FALSE | 1.130528 | FALSE | Pericyte               |
| TTACCGCC db/m1 | db/m | 2391 | 0.115723 | TRUE  | 10.15322 | TRUE  |                        |
| TTACCGCT db/m1 | db/m | 1394 | 0.018761 | FALSE | 1.956116 | FALSE | Endothelia Capillary E |
| TTACCGCT db/m1 | db/m | 8037 | 0.031411 | FALSE | 0.785568 | FALSE | Photoreceptor          |
| TTACGCCA db/m1 | db/m | 2195 | 0.067388 | FALSE | 1.347866 | FALSE | Photoreceptor          |
| TTACGCCA db/m1 | db/m | 1495 | 0.042704 | FALSE | 1.618549 | FALSE | Photoreceptor          |
| TTACGCCA db/m1 | db/m | 5977 | 0.042704 | FALSE | 1.053943 | FALSE | Endothelia Venous EC   |
| TTACGCCC db/m1 | db/m | 791  | 0.093319 | FALSE | 2.689623 | FALSE | Muller cell            |
| TTACGCCC db/m1 | db/m | 8157 | 0.01981  | FALSE | 0.815527 | FALSE | Photoreceptor          |
| TTACGCCT db/m1 | db/m | 3452 | 0.027758 | FALSE | 1.449021 | FALSE | Pericyte               |
| TTACGCCT db/m1 | db/m | 2119 | 0.055901 | FALSE | 1.395207 | FALSE | Photoreceptor          |
| TTACGCCT db/m1 | db/m | 8878 | 0.023682 | FALSE | 0.670635 | FALSE | Photoreceptor          |
| TTACGTTA db/m1 | db/m | 467  | 0.020908 | FALSE | 2.184178 | FALSE | Photoreceptor          |



|                |      |      |          |       |          |       |                         |
|----------------|------|------|----------|-------|----------|-------|-------------------------|
| TTACGTTC db/m1 | db/m | 978  | 0.028251 | FALSE | 0.689148 | FALSE | Photoreceptor           |
| TTACGTTG db/m1 | db/m | 552  | 0.025868 | FALSE | 4.705925 | FALSE | Muller cell             |
| TTACGTTG db/m1 | db/m | 4567 | 0.024971 | FALSE | 0.970134 | FALSE | Photoreceptor           |
| TTACGTTT db/m1 | db/m | 1401 | 0.012303 | FALSE | 1.102851 | FALSE | Endothelia Capillary EC |
| TTACGTTT db/m1 | db/m | 359  | 0.082569 | FALSE | 10.89109 | TRUE  |                         |
| TTACTGTA db/m1 | db/m | 4412 | 0.080645 | FALSE | 1.270704 | FALSE | Endothelia Venous EC    |
| TTACTGTA db/m1 | db/m | 933  | 0.03313  | FALSE | 1.284762 | FALSE | Photoreceptor           |
| TTACTGTA db/m1 | db/m | 7136 | 0.034954 | FALSE | 0.711239 | FALSE | Photoreceptor           |
| TTACTGTA db/m1 | db/m | 935  | 0.05065  | FALSE | 2.236352 | FALSE | Photoreceptor           |
| TTACTGTC db/m1 | db/m | 704  | 0.009933 | FALSE | 1.760823 | FALSE | Endothelia Capillary EC |
| TTACTGTC db/m1 | db/m | 2120 | 0.009493 | FALSE | 0.530357 | FALSE | Photoreceptor           |
| TTACTGTG db/m1 | db/m | 2183 | 0.058205 | FALSE | 2.121081 | FALSE | Photoreceptor           |
| TTACTGTG db/m1 | db/m | 2383 | 0.084562 | FALSE | 1.450439 | FALSE | Photoreceptor           |
| TTAGGCA/ db/m1 | db/m | 1016 | 0.018422 | FALSE | 1.572913 | FALSE | Endothelia Capillary EC |
| TTAGGCA/ db/m1 | db/m | 1729 | 0.024105 | FALSE | 1.824426 | FALSE | Endothelia Capillary EC |
| TTAGGCA/ db/m1 | db/m | 874  | 0.039671 | FALSE | 1.757804 | FALSE | Photoreceptor           |
| TTAGGCA/ db/m1 | db/m | 419  | 0.013074 | FALSE | 3.28354  | FALSE | Photoreceptor           |
| TTAGGCA( db/m1 | db/m | 1071 | 0.031411 | FALSE | 1.418938 | FALSE | Photoreceptor           |
| TTAGGCA( db/m1 | db/m | 1918 | 0.035586 | FALSE | 1.979321 | FALSE | Photoreceptor           |
| TTAGGCA( db/m1 | db/m | 1346 | 0.013605 | FALSE | 1.181093 | FALSE | Endothelia Capillary EC |
| TTAGGCAI db/m1 | db/m | 1790 | 0.037564 | FALSE | 2.257622 | FALSE | Pericyte                |
| TTAGGCAI db/m1 | db/m | 4910 | 0.028754 | FALSE | 0.840345 | FALSE | Photoreceptor           |
| TTAGGCAI db/m1 | db/m | 1430 | 0.041154 | FALSE | 1.531563 | FALSE | Photoreceptor           |
| TTAGGGT/ db/m1 | db/m | 5764 | 0.022857 | FALSE | 0.935507 | FALSE | Photoreceptor           |
| TTAGGGT/ db/m1 | db/m | 2509 | 0.091004 | FALSE | 1.150683 | FALSE | Photoreceptor           |
| TTAGGGT/ db/m1 | db/m | 1290 | 0.075259 | FALSE | 5.383615 | TRUE  |                         |
| TTAGGGT( db/m1 | db/m | 4288 | 0.032546 | FALSE | 1.371512 | FALSE | Endothelia Venous EC    |
| TTAGGGT( db/m1 | db/m | 671  | 0.020908 | FALSE | 0.943544 | FALSE | Photoreceptor           |
| TTAGGGT( db/m1 | db/m | 758  | 0.084562 | FALSE | 4.166234 | FALSE | Muller cell             |
| TTAGGGT( db/m1 | db/m | 5256 | 0.032546 | FALSE | 1.142019 | FALSE | Endothelia Venous EC    |
| TTAGGGT( db/m1 | db/m | 7917 | 0.022455 | FALSE | 0.73504  | FALSE | Photoreceptor           |
| TTAGGGTI db/m1 | db/m | 1114 | 0.054795 | FALSE | 1.544586 | FALSE | Neuron                  |
| TTAGGGTI db/m1 | db/m | 6397 | 0.022857 | FALSE | 0.9151   | FALSE | Photoreceptor           |
| TTAGTCTA db/m1 | db/m | 2906 | 0.053718 | FALSE | 5.542831 | TRUE  |                         |
| TTAGTCTG db/m1 | db/m | 1378 | 0.020536 | FALSE | 0.772442 | FALSE | Photoreceptor           |
| TTAGTCTT db/m1 | db/m | 881  | 0.036891 | FALSE | 2.494814 | FALSE | Pericyte                |
| TTAGTCTT db/m1 | db/m | 516  | 0.280108 | TRUE  | 25.39326 | TRUE  |                         |
| TTATTGCG db/m1 | db/m | 2538 | 0.048732 | FALSE | 1.163844 | FALSE | Endothelia Aterial EC   |
| TTATTGCG db/m1 | db/m | 7565 | 0.031411 | FALSE | 0.523622 | FALSE | Photoreceptor           |
| TTATTGCG db/m1 | db/m | 1511 | 0.047807 | FALSE | 0.648039 | FALSE | Photoreceptor           |
| TTATTGCG db/m1 | db/m | 2649 | 0.014711 | FALSE | 1.340114 | FALSE | Endothelia Capillary EC |
| TTATTGCG db/m1 | db/m | 6087 | 0.028251 | FALSE | 1.031214 | FALSE | Photoreceptor           |
| TTCAATCA db/m1 | db/m | 560  | 0.020536 | FALSE | 65.65866 | TRUE  |                         |
| TTCAATCC db/m1 | db/m | 3005 | 0.013074 | FALSE | 1.657496 | FALSE | Photoreceptor           |
| TTCAATCC db/m1 | db/m | 1136 | 0.027758 | FALSE | 1.011139 | FALSE | Photoreceptor           |
| TTCAATCC db/m1 | db/m | 8225 | 0.093319 | FALSE | 0.716879 | FALSE | Photoreceptor           |
| TTCAATCG db/m1 | db/m | 8316 | 0.022059 | FALSE | 0.979772 | FALSE | Photoreceptor           |

|                 |      |      |          |       |          |       |                        |
|-----------------|------|------|----------|-------|----------|-------|------------------------|
| TTC AATCG db/m1 | db/m | 5148 | 0.058205 | FALSE | 1.059938 | FALSE | Photoreceptor          |
| TTC AATCG db/m1 | db/m | 955  | 0.098234 | FALSE | 1.988656 | FALSE | Endothelia Capillary E |
| TTC AATCT db/m1 | db/m | 5444 | 0.018761 | FALSE | 1.076175 | FALSE | Photoreceptor          |
| TTC AATCT db/m1 | db/m | 3145 | 0.05065  | FALSE | 1.271579 | FALSE | Photoreceptor          |
| TTC ACCGA db/m1 | db/m | 922  | 0.044326 | FALSE | 2.427652 | FALSE | Photoreceptor          |
| TTC ACCGA db/m1 | db/m | 5746 | 0.007058 | FALSE | 1.070764 | FALSE | Photoreceptor          |
| TTC ACCG db/m1  | db/m | 1376 | 0.012557 | FALSE | 0.853513 | FALSE | Endothelia Capillary E |
| TTC ACCG db/m1  | db/m | 2812 | 0.014151 | FALSE | 1.389573 | FALSE | Photoreceptor          |
| TTC ACCGT db/m1 | db/m | 8547 | 0.038251 | FALSE | 0.841342 | FALSE | Photoreceptor          |
| TTC ACCGT db/m1 | db/m | 1207 | 0.030318 | FALSE | 0.692871 | FALSE | Photoreceptor          |
| TTC ACCGT db/m1 | db/m | 1379 | 0.008852 | FALSE | 1.669222 | FALSE | Endothelia Capillary E |
| TTC ACGCA db/m1 | db/m | 900  | 0.071958 | FALSE | 1.556138 | FALSE | Photoreceptor          |
| TTC ACGCA db/m1 | db/m | 2880 | 0.055901 | FALSE | 1.449985 | FALSE | Photoreceptor          |
| TTC ACGCT db/m1 | db/m | 780  | 0.067388 | FALSE | 7.996702 | TRUE  |                        |
| TTC ACGCT db/m1 | db/m | 765  | 0.046025 | FALSE | 0.340987 | FALSE | Photoreceptor          |
| TTC AGGAC db/m1 | db/m | 6111 | 0.046025 | FALSE | 0.841859 | FALSE | Photoreceptor          |
| TTC AGGAC db/m1 | db/m | 2696 | 0.054795 | FALSE | 1.093274 | FALSE | Photoreceptor          |
| TTC AGGAC db/m1 | db/m | 1845 | 0.08663  | FALSE | 1.6669   | FALSE | Endothelia Capillary E |
| TTC AGGAC db/m1 | db/m | 410  | 0.093319 | FALSE | 3.89551  | FALSE | Muller cell            |
| TTC AGGAC db/m1 | db/m | 5333 | 0.018088 | FALSE | 1.024693 | FALSE | Photoreceptor          |
| TTC AGGAC db/m1 | db/m | 2082 | 0.041154 | FALSE | 1.293818 | FALSE | Endothelia Venous EC   |
| TTC AGGAC db/m1 | db/m | 1197 | 0.018422 | FALSE | 3.081392 | FALSE | Muller cell            |
| TTC AGGAT db/m1 | db/m | 1890 | 0.076994 | FALSE | 1.700553 | FALSE | Muller cell            |
| TTC ATGTA db/m1 | db/m | 2785 | 0.148319 | TRUE  | 3.703239 | FALSE |                        |
| TTC ATGTA db/m1 | db/m | 3305 | 0.043505 | FALSE | 1.112846 | FALSE | Photoreceptor          |
| TTC ATGTC db/m1 | db/m | 6877 | 0.018088 | FALSE | 1.081616 | FALSE | Photoreceptor          |
| TTC ATGTG db/m1 | db/m | 7197 | 0.012557 | FALSE | 0.506826 | FALSE | Photoreceptor          |
| TTC ATGTT db/m1 | db/m | 2748 | 0.025868 | FALSE | 0.986014 | FALSE | Endothelia Capillary E |
| TTC ATGTT db/m1 | db/m | 3377 | 0.046906 | FALSE | 1.424542 | FALSE | Photoreceptor          |
| TTC ATTGC db/m1 | db/m | 3365 | 0.164835 | TRUE  | 11.385   | TRUE  |                        |
| TTC ATTGC db/m1 | db/m | 4662 | 0.060641 | FALSE | 1.265661 | FALSE | Photoreceptor          |
| TTC ATTGG db/m1 | db/m | 4955 | 0.030859 | FALSE | 1.325315 | FALSE | Photoreceptor          |
| TTC ATTGT db/m1 | db/m | 7057 | 0.005095 | FALSE | 0.98672  | FALSE | Photoreceptor          |
| TTCCAATA db/m1  | db/m | 425  | 0.014429 | FALSE | 0.808689 | FALSE | Photoreceptor          |
| TTCCAATA db/m1  | db/m | 1881 | 0.088776 | FALSE | 1.098012 | FALSE | Photoreceptor          |
| TTCCAATG db/m1  | db/m | 2534 | 0.024971 | FALSE | 1.348399 | FALSE | Neuron                 |
| TTCCAATG db/m1  | db/m | 2602 | 0.041154 | FALSE | 1.346963 | FALSE | Endothelia Capillary E |
| TTCCACGA db/m1  | db/m | 2353 | 0.082569 | FALSE | 1.929779 | FALSE | Neuron                 |
| TTCCACGA db/m1  | db/m | 631  | 0.126437 | TRUE  | 17.05202 | TRUE  |                        |
| TTCCACGA db/m1  | db/m | 2063 | 0.03313  | FALSE | 1.347351 | FALSE | Photoreceptor          |
| TTCCACGA db/m1  | db/m | 957  | 0.095727 | FALSE | 21.7086  | TRUE  |                        |
| TTCCACGC db/m1  | db/m | 952  | 0.005095 | FALSE | 1.796868 | FALSE | Pericyte               |
| TTCCACGC db/m1  | db/m | 1670 | 0.024105 | FALSE | 1.548919 | FALSE | Endothelia Aterial EC  |
| TTCCACGC db/m1  | db/m | 2832 | 0.070386 | FALSE | 1.633086 | FALSE | Photoreceptor          |
| TTCCACGC db/m1  | db/m | 4018 | 0.011805 | FALSE | 1.230278 | FALSE | Photoreceptor          |
| TTCCACGT db/m1  | db/m | 1794 | 0.028754 | FALSE | 1.493958 | FALSE | Endothelia Venous EC   |
| TTCCGGTA db/m1  | db/m | 2672 | 0.065957 | FALSE | 1.417336 | FALSE | Photoreceptor          |

|                |      |      |          |       |          |       |                        |
|----------------|------|------|----------|-------|----------|-------|------------------------|
| TTCCGGTC db/m1 | db/m | 379  | 0.013338 | FALSE | 1.809964 | FALSE | Photoreceptor          |
| TTCCGGTC db/m1 | db/m | 843  | 0.073582 | FALSE | 0.967699 | FALSE | Photoreceptor          |
| TTCCGGTC db/m1 | db/m | 8153 | 0.015879 | FALSE | 0.970626 | FALSE | Photoreceptor          |
| TTCCGGTC db/m1 | db/m | 5074 | 0.054795 | FALSE | 1.527862 | FALSE | Photoreceptor          |
| TTCCGGTT db/m1 | db/m | 1519 | 0.071958 | FALSE | 2.521136 | FALSE | Photoreceptor          |
| TTCCGGTT db/m1 | db/m | 6732 | 0.112477 | TRUE  | 1.526146 | FALSE |                        |
| TTCCGTGA db/m1 | db/m | 726  | 0.073582 | FALSE | 2.01196  | FALSE | Photoreceptor          |
| TTCCGTGA db/m1 | db/m | 407  | 0.053718 | FALSE | 3.675118 | FALSE | Muller cell            |
| TTCCGTGC db/m1 | db/m | 1469 | 0.019106 | FALSE | 1.419072 | FALSE | Endothelia Capillary E |
| TTCCGTGC db/m1 | db/m | 2181 | 0.034954 | FALSE | 1.053442 | FALSE | Neuron                 |
| TTCCGTGC db/m1 | db/m | 1918 | 0.009493 | FALSE | 1.189925 | FALSE | Endothelia Aterial EC  |
| TTCCGTGC db/m1 | db/m | 2584 | 0.027758 | FALSE | 1.107439 | FALSE | Microglia              |
| TTCCGTGT db/m1 | db/m | 923  | 0.023266 | FALSE | 1.229993 | FALSE | Photoreceptor          |
| TTCCGTGT db/m1 | db/m | 7353 | 0.022857 | FALSE | 0.985248 | FALSE | Photoreceptor          |
| TTCCTAAA db/m1 | db/m | 1059 | 0.008032 | FALSE | 1.899723 | FALSE | Endothelia Capillary E |
| TTCCTAAC db/m1 | db/m | 1762 | 0.035586 | FALSE | 1.44232  | FALSE | Photoreceptor          |
| TTCCTAAC db/m1 | db/m | 1810 | 0.040404 | FALSE | 1.495677 | FALSE | Photoreceptor          |
| TTCCTAAC db/m1 | db/m | 8663 | 0.011081 | FALSE | 0.800611 | FALSE | Photoreceptor          |
| TTCCTAAG db/m1 | db/m | 536  | 0.046025 | FALSE | 4.790931 | FALSE | Muller cell            |
| TTCCTAAG db/m1 | db/m | 2204 | 0.024105 | FALSE | 1.183966 | FALSE | Endothelia Venous EC   |
| TTCCTAAG db/m1 | db/m | 2433 | 0.024534 | FALSE | 1.217567 | FALSE | Endothelia Venous EC   |
| TTCCTAAG db/m1 | db/m | 2737 | 0.014429 | FALSE | 1.362296 | FALSE | Endothelia Venous EC   |
| TTCCTAAT db/m1 | db/m | 361  | 0.026328 | FALSE | 3.462496 | FALSE | Endothelia Capillary E |
| TTCCTCTA db/m1 | db/m | 630  | 0.022059 | FALSE | 3.156701 | FALSE | Endothelia Capillary E |
| TTCCTCTA db/m1 | db/m | 789  | 0.060641 | FALSE | 1.465011 | FALSE | Photoreceptor          |
| TTCCTCTA db/m1 | db/m | 1287 | 0.044326 | FALSE | 1.549065 | FALSE | Photoreceptor          |
| TTCCTCTA db/m1 | db/m | 1286 | 0.021286 | FALSE | 1.493523 | FALSE | Photoreceptor          |
| TTCCTCTC db/m1 | db/m | 2071 | 0.022455 | FALSE | 1.282483 | FALSE | Endothelia Aterial EC  |
| TTCCTCTC db/m1 | db/m | 2313 | 0.008852 | FALSE | 1.538893 | FALSE | Neuron                 |
| TTCCTCTG db/m1 | db/m | 2447 | 0.016488 | FALSE | 1.459408 | FALSE | Photoreceptor          |
| TTCCTCTG db/m1 | db/m | 3433 | 0.031973 | FALSE | 2.165301 | FALSE | Muller cell            |
| TTCCTCTG db/m1 | db/m | 1508 | 0.016799 | FALSE | 1.127281 | FALSE | Photoreceptor          |
| TTCCTCTG db/m1 | db/m | 1311 | 0.021669 | FALSE | 1.580934 | FALSE | Endothelia Venous EC   |
| TTCCTCTT db/m1 | db/m | 561  | 0.028251 | FALSE | 2.415166 | FALSE | Endothelia Capillary E |
| TTCCTCTT db/m1 | db/m | 3676 | 0.039671 | FALSE | 1.131899 | FALSE | Photoreceptor          |
| TTCCTCTT db/m1 | db/m | 2972 | 0.021669 | FALSE | 1.244363 | FALSE | Endothelia Venous EC   |
| TTCCTTCA db/m1 | db/m | 433  | 0.020171 | FALSE | 3.142035 | FALSE | Microglia              |
| TTCCTTCA db/m1 | db/m | 870  | 0.010614 | FALSE | 0.48893  | FALSE | Photoreceptor          |
| TTCCTTCC db/m1 | db/m | 651  | 0.014711 | FALSE | 0.746888 | FALSE | Photoreceptor          |
| TTCCTTCT db/m1 | db/m | 1292 | 0.024105 | FALSE | 0.71813  | FALSE | Photoreceptor          |
| TTCGATTA db/m1 | db/m | 1276 | 0.007636 | FALSE | 1.192598 | FALSE | Pericyte               |
| TTCGATTC db/m1 | db/m | 3754 | 0.016488 | FALSE | 0.792527 | FALSE | Photoreceptor          |
| TTCGCTGA db/m1 | db/m | 8509 | 0.015581 | FALSE | 0.818423 | FALSE | Photoreceptor          |
| TTCGCTGC db/m1 | db/m | 1161 | 0.098234 | FALSE | 1.335561 | FALSE | Photoreceptor          |
| TTCGCTGT db/m1 | db/m | 1202 | 0.028754 | FALSE | 1.031733 | FALSE | Photoreceptor          |
| TTCGCTGT db/m1 | db/m | 520  | 0.051646 | FALSE | 9.274194 | TRUE  |                        |
| TTCGGTCA db/m1 | db/m | 4423 | 0.082569 | FALSE | 0.814053 | FALSE | Photoreceptor          |

|                |      |      |          |       |          |       |                        |
|----------------|------|------|----------|-------|----------|-------|------------------------|
| TTCGGTCA db/m1 | db/m | 781  | 0.014711 | FALSE | 2.284148 | FALSE | Muller cell            |
| TTCGGTCC db/m1 | db/m | 1793 | 0.043505 | FALSE | 0.636418 | FALSE | Photoreceptor          |
| TTCGGTCT db/m1 | db/m | 864  | 0.036891 | FALSE | 0.89769  | FALSE | Photoreceptor          |
| TTCGGTCT db/m1 | db/m | 6733 | 0.022059 | FALSE | 0.627763 | FALSE | Photoreceptor          |
| TTCTAACA db/m1 | db/m | 757  | 0.030318 | FALSE | 0.562057 | FALSE | Photoreceptor          |
| TTCTAACA db/m1 | db/m | 972  | 0.004762 | FALSE | 1.359321 | FALSE | Endothelia Capillary E |
| TTCTAACC db/m1 | db/m | 243  | 0.045165 | FALSE | 1.833615 | FALSE | Muller cell            |
| TTCTAACC db/m1 | db/m | 8716 | 0.019106 | FALSE | 0.69921  | FALSE | Photoreceptor          |
| TTCTAACG db/m1 | db/m | 1181 | 0.017758 | FALSE | 2.355995 | FALSE | Endothelia Capillary E |
| TTCTAACG db/m1 | db/m | 8350 | 0.011081 | FALSE | 0.990189 | FALSE | Photoreceptor          |
| TTCTAACT db/m1 | db/m | 2258 | 0.017434 | FALSE | 0.629682 | FALSE | Photoreceptor          |
| TTCTAGTA db/m1 | db/m | 3675 | 0.073582 | FALSE | 1.374445 | FALSE | Neuron                 |
| TTCTAGTA db/m1 | db/m | 2243 | 0.018422 | FALSE | 1.442149 | FALSE | Endothelia Capillary E |
| TTCTAGTA db/m1 | db/m | 1981 | 0.070386 | FALSE | 1.432823 | FALSE | Photoreceptor          |
| TTCTAGTA db/m1 | db/m | 1417 | 0.109375 | TRUE  | 11.9314  | TRUE  |                        |
| TTCTAGTC db/m1 | db/m | 6045 | 0.033726 | FALSE | 1.017846 | FALSE | Photoreceptor          |
| TTCTCTCA db/m1 | db/m | 5043 | 0.026796 | FALSE | 0.921725 | FALSE | Photoreceptor          |
| TTCTCTCA db/m1 | db/m | 4203 | 0.022455 | FALSE | 0.890283 | FALSE | Photoreceptor          |
| TTCTCTCA db/m1 | db/m | 793  | 0.039671 | FALSE | 3.010456 | FALSE | Endothelia Capillary E |
| TTCTCTCA db/m1 | db/m | 1091 | 0.084562 | FALSE | 0.926708 | FALSE | Photoreceptor          |
| TTCTCTCC db/m1 | db/m | 6628 | 0.026328 | FALSE | 0.762995 | FALSE | Photoreceptor          |
| TTCTCTCC db/m1 | db/m | 1386 | 0.058205 | FALSE | 1.188862 | FALSE | Photoreceptor          |
| TTCTCTCG db/m1 | db/m | 3415 | 0.064568 | FALSE | 1.582119 | FALSE | Photoreceptor          |
| TTCTCTCG db/m1 | db/m | 1369 | 0.006683 | FALSE | 1.649194 | FALSE | Pericyte               |
| TTCTCTCT db/m1 | db/m | 822  | 0.038953 | FALSE | 0.635749 | FALSE | Photoreceptor          |
| TTCTCTCT db/m1 | db/m | 1226 | 0.039671 | FALSE | 1.541693 | FALSE | Photoreceptor          |
| TTCTGTAA db/m1 | db/m | 5674 | 0.01981  | FALSE | 1.029205 | FALSE | Photoreceptor          |
| TTCTGTAA db/m1 | db/m | 8725 | 0.018422 | FALSE | 0.755757 | FALSE | Photoreceptor          |
| TTCTGTAC db/m1 | db/m | 3536 | 0.029266 | FALSE | 1.159051 | FALSE | Endothelia Capillary E |
| TTCTGTAC db/m1 | db/m | 7648 | 0.008438 | FALSE | 1.054724 | FALSE | Photoreceptor          |
| TTCTGTAG db/m1 | db/m | 2372 | 0.009712 | FALSE | 1.511966 | FALSE | Photoreceptor          |
| TTCTGTAT db/m1 | db/m | 1895 | 0.265464 | TRUE  | 29.49146 | TRUE  |                        |
| TTCTGTAT db/m1 | db/m | 1001 | 0.020171 | FALSE | 1.077546 | FALSE | Photoreceptor          |
| TTCTGTAT db/m1 | db/m | 5538 | 0.047807 | FALSE | 1.049785 | FALSE | Photoreceptor          |
| TTCTGTAT db/m1 | db/m | 5010 | 0.03313  | FALSE | 0.861738 | FALSE | Photoreceptor          |
| TTCTTCCA db/m1 | db/m | 1363 | 0.061912 | FALSE | 1.65063  | FALSE | Photoreceptor          |
| TTCTTCCG db/m1 | db/m | 545  | 0.063221 | FALSE | 6.064516 | TRUE  |                        |
| TTCTTCCG db/m1 | db/m | 657  | 0.024534 | FALSE | 2.469573 | FALSE | Endothelia Capillary E |
| TTCTTCCG db/m1 | db/m | 7447 | 0.008438 | FALSE | 0.823464 | FALSE | Photoreceptor          |
| TTCTTCCT db/m1 | db/m | 1501 | 0.054795 | FALSE | 1.040991 | FALSE | Photoreceptor          |
| TTCTTCCT db/m1 | db/m | 584  | 0.049679 | FALSE | 4.993745 | FALSE | Muller cell            |
| TTCTTCCT db/m1 | db/m | 2781 | 0.059406 | FALSE | 1.110902 | FALSE | Endothelia Capillary E |
| TTCTTCCT db/m1 | db/m | 2218 | 0.065957 | FALSE | 7.334487 | TRUE  |                        |
| TTCTTGAA db/m1 | db/m | 3415 | 0.080645 | FALSE | 1.736198 | FALSE | Neuron                 |
| TTCTTGAC db/m1 | db/m | 1953 | 0.030318 | FALSE | 1.306332 | FALSE | Photoreceptor          |
| TTCTTGAG db/m1 | db/m | 1309 | 0.024971 | FALSE | 0.963771 | FALSE | Photoreceptor          |
| TTCTTGAG db/m1 | db/m | 4596 | 0.025416 | FALSE | 1.12404  | FALSE | Photoreceptor          |

|                |      |      |          |       |          |       |                         |
|----------------|------|------|----------|-------|----------|-------|-------------------------|
| TTCTTGAT db/m1 | db/m | 708  | 0.057037 | FALSE | 2.723452 | FALSE | Neuron                  |
| TTGAACGC db/m1 | db/m | 3767 | 0.01981  | FALSE | 0.667634 | FALSE | Photoreceptor           |
| TTGAACGC db/m1 | db/m | 1544 | 0.065957 | FALSE | 2.220291 | FALSE | Muller cell             |
| TTGAACGC db/m1 | db/m | 569  | 0.010384 | FALSE | 3.383816 | FALSE | Photoreceptor           |
| TTGAACGC db/m1 | db/m | 6766 | 0.028251 | FALSE | 0.874266 | FALSE | Photoreceptor           |
| TTGAACGC db/m1 | db/m | 993  | 0.098234 | FALSE | 1.745077 | FALSE | Photoreceptor           |
| TTGACCCA db/m1 | db/m | 358  | 0.028754 | FALSE | 3.952896 | FALSE | Photoreceptor           |
| TTGACCCA db/m1 | db/m | 433  | 0.073582 | FALSE | 3.125936 | FALSE | Muller cell             |
| TTGACCCA db/m1 | db/m | 1395 | 0.035586 | FALSE | 3.10823  | FALSE | Muller cell             |
| TTGACCCA db/m1 | db/m | 2921 | 0.030859 | FALSE | 1.314194 | FALSE | Endothelia Venous EC    |
| TTGACCCC db/m1 | db/m | 956  | 0.095727 | FALSE | 3.146917 | FALSE | Muller cell             |
| TTGACCCC db/m1 | db/m | 461  | 0.028251 | FALSE | 2.761268 | FALSE | Photoreceptor           |
| TTGACCCC db/m1 | db/m | 8455 | 0.017434 | FALSE | 0.86237  | FALSE | Photoreceptor           |
| TTGACCCC db/m1 | db/m | 2659 | 0.021286 | FALSE | 1.276547 | FALSE | Endothelia Capillary EC |
| TTGACCCC db/m1 | db/m | 4158 | 0.017758 | FALSE | 0.921474 | FALSE | Endothelia Venous EC    |
| TTGACCCC db/m1 | db/m | 1972 | 0.007636 | FALSE | 1.407184 | FALSE | Pericyte                |
| TTGACCCT db/m1 | db/m | 7437 | 0.017434 | FALSE | 0.931065 | FALSE | Photoreceptor           |
| TTGACCCT db/m1 | db/m | 1696 | 0.021286 | FALSE | 1.52752  | FALSE | Endothelia Capillary EC |
| TTGAGTGA db/m1 | db/m | 2935 | 0.252153 | TRUE  | 8.567513 | TRUE  |                         |
| TTGAGTGC db/m1 | db/m | 1484 | 0.047807 | FALSE | 1.240819 | FALSE | Photoreceptor           |
| TTGAGTGC db/m1 | db/m | 1808 | 0.082569 | FALSE | 2.393475 | FALSE | Muller cell             |
| TTGAGTGC db/m1 | db/m | 487  | 0.15354  | TRUE  | 22.85369 | TRUE  |                         |
| TTGAGTGC db/m1 | db/m | 1035 | 0.016799 | FALSE | 1.44962  | FALSE | Endothelia Capillary EC |
| TTGAGTGC db/m1 | db/m | 732  | 0.034334 | FALSE | 4.392476 | FALSE | Muller cell             |
| TTGAGTGT db/m1 | db/m | 4166 | 0.013074 | FALSE | 1.147871 | FALSE | Photoreceptor           |
| TTGAGTGT db/m1 | db/m | 1745 | 0.048732 | FALSE | 2.028686 | FALSE | Photoreceptor           |
| TTGAGTGT db/m1 | db/m | 1091 | 0.068864 | FALSE | 1.08399  | FALSE | Photoreceptor           |
| TTGAGTGT db/m1 | db/m | 7883 | 0.010614 | FALSE | 0.853897 | FALSE | Photoreceptor           |
| TTGAGTGT db/m1 | db/m | 5236 | 0.026328 | FALSE | 0.892043 | FALSE | Photoreceptor           |
| TTGATGGC db/m1 | db/m | 1934 | 0.024971 | FALSE | 1.702844 | FALSE | Endothelia Aterial EC   |
| TTGATGGC db/m1 | db/m | 877  | 0.076994 | FALSE | 1.876789 | FALSE | Photoreceptor           |
| TTGATGGT db/m1 | db/m | 3000 | 0.003345 | FALSE | 1.061694 | FALSE | Neuron                  |
| TTGCATTA db/m1 | db/m | 1058 | 0.03313  | FALSE | 1.904413 | FALSE | Endothelia Capillary EC |
| TTGCATTT db/m1 | db/m | 4536 | 0.070386 | FALSE | 1.419035 | FALSE | Photoreceptor           |
| TTGCCTGA db/m1 | db/m | 1055 | 0.055901 | FALSE | 4.876662 | FALSE | Muller cell             |
| TTGCCTGA db/m1 | db/m | 1195 | 0.049679 | FALSE | 1.85321  | FALSE | Photoreceptor           |
| TTGCCTGA db/m1 | db/m | 475  | 0.039671 | FALSE | 1.519769 | FALSE | Photoreceptor           |
| TTGCCTGC db/m1 | db/m | 6165 | 0.030859 | FALSE | 0.984669 | FALSE | Photoreceptor           |
| TTGCCTGC db/m1 | db/m | 9264 | 0.018088 | FALSE | 0.732753 | FALSE | Photoreceptor           |
| TTGCCTGC db/m1 | db/m | 4461 | 0.040404 | FALSE | 0.8282   | FALSE | Photoreceptor           |
| TTGCCTGC db/m1 | db/m | 2271 | 0.075259 | FALSE | 1.865012 | FALSE | Endothelia Capillary EC |
| TTGCGTCC db/m1 | db/m | 1520 | 0.024971 | FALSE | 0.933055 | FALSE | Photoreceptor           |
| TTGCGTCC db/m1 | db/m | 1931 | 0.021286 | FALSE | 0.705146 | FALSE | Photoreceptor           |
| TTGCGTCC db/m1 | db/m | 605  | 0.030318 | FALSE | 0.86113  | FALSE | Photoreceptor           |
| TTGCGTCT db/m1 | db/m | 373  | 0.049679 | FALSE | 3.018258 | FALSE | Photoreceptor           |
| TTGCTGCT db/m1 | db/m | 435  | 0.05065  | FALSE | 2.529008 | FALSE | Photoreceptor           |
| TTGCTGCT db/m1 | db/m | 4079 | 0.038953 | FALSE | 1.121721 | FALSE | Photoreceptor           |

|                |      |      |          |       |          |       |                        |
|----------------|------|------|----------|-------|----------|-------|------------------------|
| TTGGATG/ db/m1 | db/m | 1767 | 0.063221 | FALSE | 1.967422 | FALSE | Endothelia Capillary E |
| TTGGATG( db/m1 | db/m | 1730 | 0.046906 | FALSE | 1.966782 | FALSE | Photoreceptor          |
| TTGGATG  db/m1 | db/m | 1613 | 0.055901 | FALSE | 1.683143 | FALSE | Endothelia Capillary E |
| TTGGATG  db/m1 | db/m | 5546 | 0.063221 | FALSE | 1.242074 | FALSE | Photoreceptor          |
| TTGGGAT( db/m1 | db/m | 1337 | 0.008032 | FALSE | 2.095372 | FALSE | Neuron                 |
| TTGGGAT( db/m1 | db/m | 982  | 0.05065  | FALSE | 1.308753 | FALSE | Photoreceptor          |
| TTGGGAT  db/m1 | db/m | 1731 | 0.013074 | FALSE | 1.523333 | FALSE | Endothelia Capillary E |
| TTGGGAT  db/m1 | db/m | 910  | 0.030318 | FALSE | 0.61239  | FALSE | Photoreceptor          |
| TTGGGCG( db/m1 | db/m | 399  | 0.122691 | TRUE  | 10.88435 | TRUE  |                        |
| TTGGGCG( db/m1 | db/m | 1040 | 0.053718 | FALSE | 1.196783 | FALSE | Photoreceptor          |
| TTGGGCG  db/m1 | db/m | 2073 | 0.017758 | FALSE | 1.444074 | FALSE | Endothelia Capillary E |
| TTGGGTA/ db/m1 | db/m | 1200 | 0.034954 | FALSE | 0.974325 | FALSE | Photoreceptor          |
| TTGGGTAC db/m1 | db/m | 742  | 0.049679 | FALSE | 0.612988 | FALSE | Photoreceptor          |
| TTGGGTAC db/m1 | db/m | 731  | 0.033726 | FALSE | 2.177648 | FALSE | Photoreceptor          |
| TTGGTTTA db/m1 | db/m | 2056 | 0.098234 | FALSE | 11.08198 | TRUE  |                        |
| TTGGTTTA db/m1 | db/m | 7388 | 0.024971 | FALSE | 1.015312 | FALSE | Photoreceptor          |
| TTGGTTTC db/m1 | db/m | 6460 | 0.009933 | FALSE | 1.183788 | FALSE | Photoreceptor          |
| TTGGTTTT db/m1 | db/m | 1359 | 0.016799 | FALSE | 1.588515 | FALSE | Endothelia Capillary E |
| TTGTGGA/ db/m1 | db/m | 922  | 0.038251 | FALSE | 1.567848 | FALSE | Photoreceptor          |
| TTGTGGA( db/m1 | db/m | 6328 | 0.019455 | FALSE | 0.991639 | FALSE | Photoreceptor          |
| TTGTGGA( db/m1 | db/m | 3586 | 0.057037 | FALSE | 1.08583  | FALSE | Endothelia Venous EC   |
| TTGTGTTA db/m1 | db/m | 726  | 0.011561 | FALSE | 2.142504 | FALSE | Endothelia Capillary E |
| TTGTGTTA db/m1 | db/m | 2956 | 0.037564 | FALSE | 0.98864  | FALSE | Photoreceptor          |
| TTGTGTTC db/m1 | db/m | 803  | 0.042704 | FALSE | 1.6552   | FALSE | Photoreceptor          |
| TTGTGTTC db/m1 | db/m | 1104 | 0.044326 | FALSE | 0.809414 | FALSE | Photoreceptor          |
| TTGTGTTC db/m1 | db/m | 612  | 0.037564 | FALSE | 3.927237 | FALSE | Muller cell            |
| TTGTGTTG db/m1 | db/m | 1981 | 0.027758 | FALSE | 1.277539 | FALSE | Pericyte               |
| TTGTGTTG db/m1 | db/m | 4018 | 0.024534 | FALSE | 1.290131 | FALSE | Photoreceptor          |
| TTGTGTTT db/m1 | db/m | 220  | 0.018088 | FALSE | 78.57143 | TRUE  |                        |
| TTGTGTTT db/m1 | db/m | 5367 | 0.045165 | FALSE | 0.946693 | FALSE | Photoreceptor          |
| TTGTGTTT db/m1 | db/m | 1005 | 0.042704 | FALSE | 0.823179 | FALSE | Photoreceptor          |
| TTGTTCAA db/m1 | db/m | 516  | 0.029266 | FALSE | 1.455697 | FALSE | Photoreceptor          |
| TTGTTCAG db/m1 | db/m | 4751 | 0.05065  | FALSE | 0.940681 | FALSE | Photoreceptor          |
| TTGTTCAT db/m1 | db/m | 7364 | 0.04192  | FALSE | 0.861682 | FALSE | Photoreceptor          |
| TTGTTGTC db/m1 | db/m | 914  | 0.026328 | FALSE | 2.149019 | FALSE | Endothelia Capillary E |
| TTGTTGTG db/m1 | db/m | 574  | 0.038953 | FALSE | 1.794803 | FALSE | Photoreceptor          |
| TTGTTGTT db/m1 | db/m | 715  | 0.035586 | FALSE | 2.39021  | FALSE | Microglia              |
| TTGTTGTT db/m1 | db/m | 1151 | 0.065957 | FALSE | 1.232118 | FALSE | Photoreceptor          |
| TTGTTTGA db/m1 | db/m | 5956 | 0.019455 | FALSE | 0.939139 | FALSE | Photoreceptor          |
| TTGTTTGA db/m1 | db/m | 5713 | 0.184701 | TRUE  | 5.513197 | TRUE  |                        |
| TTGTTTGC db/m1 | db/m | 384  | 0.023682 | FALSE | 2.878875 | FALSE | Pericyte               |
| TTGTTTGT db/m1 | db/m | 2102 | 0.021669 | FALSE | 1.62213  | FALSE | Endothelia Aterial EC  |
| TTGTTTGT db/m1 | db/m | 1389 | 0.027758 | FALSE | 1.123973 | FALSE | Photoreceptor          |
| TTGTTTGT db/m1 | db/m | 8369 | 0.088776 | FALSE | 0.776906 | FALSE | Photoreceptor          |
| TTGTTTGT db/m1 | db/m | 3746 | 0.058205 | FALSE | 1.98607  | FALSE | Neuron                 |
| TTGTTTGT db/m1 | db/m | 2640 | 0.019455 | FALSE | 1.345134 | FALSE | Endothelia Capillary E |
| TTTACCAC db/m1 | db/m | 7275 | 0.008234 | FALSE | 0.877959 | FALSE | Photoreceptor          |

|                |      |      |          |       |          |       |                        |
|----------------|------|------|----------|-------|----------|-------|------------------------|
| TTTACCAC db/m1 | db/m | 3340 | 0.014711 | FALSE | 0.767208 | FALSE | Photoreceptor          |
| TTTACCAT db/m1 | db/m | 6498 | 0.039671 | FALSE | 0.491795 | FALSE | Photoreceptor          |
| TTTACCAT db/m1 | db/m | 8299 | 0.016488 | FALSE | 0.743204 | FALSE | Photoreceptor          |
| TTTACGTA db/m1 | db/m | 2157 | 0.026328 | FALSE | 0.967598 | FALSE | Microglia              |
| TTTACGTC db/m1 | db/m | 4269 | 0.119124 | TRUE  | 6.029192 | TRUE  |                        |
| TTTACGTG db/m1 | db/m | 162  | 0.049679 | FALSE | 10.35857 | TRUE  |                        |
| TTTACGTT db/m1 | db/m | 5470 | 0.067388 | FALSE | 0.766295 | FALSE | Photoreceptor          |
| TTTACGTT db/m1 | db/m | 2789 | 0.016488 | FALSE | 1.019265 | FALSE | Endothelia Venous EC   |
| TTTACGTT db/m1 | db/m | 4793 | 0.030318 | FALSE | 1.220614 | FALSE | Photoreceptor          |
| TTTACGTT db/m1 | db/m | 752  | 0.008234 | FALSE | 0.842878 | FALSE | Photoreceptor          |
| TTTACTGG db/m1 | db/m | 5815 | 0.011805 | FALSE | 1.106619 | FALSE | Photoreceptor          |
| TTTAGTCA db/m1 | db/m | 1020 | 0.007249 | FALSE | 2.034821 | FALSE | Pericyte               |
| TTTAGTCA db/m1 | db/m | 393  | 0.059406 | FALSE | 1.285549 | FALSE | Photoreceptor          |
| TTTAGTCA db/m1 | db/m | 3742 | 0.025416 | FALSE | 1.163512 | FALSE | Endothelia Venous EC   |
| TTTAGTCC db/m1 | db/m | 4143 | 0.038251 | FALSE | 1.111278 | FALSE | Photoreceptor          |
| TTTAGTCG db/m1 | db/m | 2689 | 0.015879 | FALSE | 1.374829 | FALSE | Endothelia Capillary E |
| TTTAGTCG db/m1 | db/m | 1781 | 0.046025 | FALSE | 1.500856 | FALSE | Photoreceptor          |
| TTTAGTCG db/m1 | db/m | 1535 | 0.053718 | FALSE | 2.08064  | FALSE | Photoreceptor          |
| TTTAGTCG db/m1 | db/m | 4589 | 0.044326 | FALSE | 1.110626 | FALSE | Photoreceptor          |
| TTTAGTCT db/m1 | db/m | 1448 | 0.055901 | FALSE | 0.782936 | FALSE | Photoreceptor          |
| TTTATGCA db/m1 | db/m | 738  | 0.068864 | FALSE | 1.045015 | FALSE | Photoreceptor          |
| TTTATGCC db/m1 | db/m | 1076 | 0.027758 | FALSE | 2.282276 | FALSE | Neuron                 |
| TTTATGCC db/m1 | db/m | 7235 | 0.138889 | TRUE  | 1.962375 | FALSE |                        |
| TTTATGCC db/m1 | db/m | 852  | 0.042704 | FALSE | 2.11612  | FALSE | Photoreceptor          |
| TTTATGCG db/m1 | db/m | 8014 | 0.022857 | FALSE | 0.566062 | FALSE | Photoreceptor          |
| TTTATGCG db/m1 | db/m | 422  | 0.034334 | FALSE | 4.653036 | FALSE | Muller cell            |
| TTTATGCG db/m1 | db/m | 6598 | 0.018088 | FALSE | 1.005873 | FALSE | Photoreceptor          |
| TTTCACAA db/m1 | db/m | 1767 | 0.041154 | FALSE | 1.114259 | FALSE | Photoreceptor          |
| TTTCACAA db/m1 | db/m | 2038 | 0.028754 | FALSE | 1.397994 | FALSE | Photoreceptor          |
| TTTCACAA db/m1 | db/m | 1374 | 0.055901 | FALSE | 1.038143 | FALSE | Photoreceptor          |
| TTTCACAC db/m1 | db/m | 2488 | 0.130374 | TRUE  | 5.465892 | TRUE  |                        |
| TTTCACAC db/m1 | db/m | 8106 | 0.010846 | FALSE | 0.992113 | FALSE | Photoreceptor          |
| TTTCACAC db/m1 | db/m | 1485 | 0.037564 | FALSE | 0.647455 | FALSE | Photoreceptor          |
| TTTCACAC db/m1 | db/m | 489  | 0.043505 | FALSE | 0.925053 | FALSE | Photoreceptor          |
| TTTCACAC db/m1 | db/m | 9636 | 0.014711 | FALSE | 0.888839 | FALSE | Photoreceptor          |
| TTTCACAC db/m1 | db/m | 367  | 0.012557 | FALSE | 3.168487 | FALSE | Muller cell            |
| TTTCACAG db/m1 | db/m | 1297 | 0.042704 | FALSE | 1.594287 | FALSE | Photoreceptor          |
| TTTCACAG db/m1 | db/m | 862  | 0.014997 | FALSE | 1.077987 | FALSE | Photoreceptor          |
| TTTCACAT db/m1 | db/m | 1124 | 0.015287 | FALSE | 3.766146 | FALSE | Muller cell            |
| TTTCAGTA db/m1 | db/m | 2989 | 0.075259 | FALSE | 1.576631 | FALSE | Photoreceptor          |
| TTTCAGTG db/m1 | db/m | 3010 | 0.025416 | FALSE | 1.160067 | FALSE | Endothelia Capillary E |
| TTTCAGTG db/m1 | db/m | 801  | 0.022455 | FALSE | 1.076872 | FALSE | Photoreceptor          |
| TTTCAGTT db/m1 | db/m | 4350 | 0.020908 | FALSE | 1.192621 | FALSE | Photoreceptor          |
| TTTCAGTT db/m1 | db/m | 4000 | 0.093319 | FALSE | 1.260981 | FALSE | Photoreceptor          |
| TTTCAGTT db/m1 | db/m | 690  | 0.008644 | FALSE | 2.579246 | FALSE | Pericyte               |
| TTTCAGTT db/m1 | db/m | 1477 | 0.054795 | FALSE | 4.017492 | FALSE | Muller cell            |
| TTTCAGTT db/m1 | db/m | 1495 | 0.044326 | FALSE | 2.04967  | FALSE | Photoreceptor          |

|                |      |      |          |       |          |       |                        |
|----------------|------|------|----------|-------|----------|-------|------------------------|
| TTTCAGTT db/m1 | db/m | 2782 | 0.020171 | FALSE | 1.653049 | FALSE | Endothelia Venous EC   |
| TTTCAGTT db/m1 | db/m | 353  | 0.200401 | TRUE  | 23.69338 | TRUE  |                        |
| TTTCAGTT db/m1 | db/m | 1492 | 0.025416 | FALSE | 1.711664 | FALSE | Endothelia Capillary E |
| TTTCATGA db/m1 | db/m | 2477 | 0.012557 | FALSE | 1.792217 | FALSE | Neuron                 |
| TTTCATGA db/m1 | db/m | 6469 | 0.016181 | FALSE | 0.865874 | FALSE | Photoreceptor          |
| TTTCATGC db/m1 | db/m | 2929 | 0.019455 | FALSE | 1.135826 | FALSE | Photoreceptor          |
| TTTCATGC db/m1 | db/m | 8694 | 0.012303 | FALSE | 0.800128 | FALSE | Photoreceptor          |
| TTTCATGG db/m1 | db/m | 2422 | 0.026328 | FALSE | 1.279544 | FALSE | Neuron                 |
| TTTCATGG db/m1 | db/m | 4113 | 0.043505 | FALSE | 1.281964 | FALSE | Photoreceptor          |
| TTTCATGG db/m1 | db/m | 4614 | 0.018761 | FALSE | 1.006424 | FALSE | Endothelia Venous EC   |
| TTTCATGT db/m1 | db/m | 807  | 0.055901 | FALSE | 2.491333 | FALSE | Muller cell            |
| TTTCATGT db/m1 | db/m | 763  | 0.036891 | FALSE | 1.693705 | FALSE | Photoreceptor          |
| TTTCATGT db/m1 | db/m | 780  | 0.041154 | FALSE | 1.321356 | FALSE | Photoreceptor          |
| TTTCCTCA db/m1 | db/m | 8101 | 0.018422 | FALSE | 0.942865 | FALSE | Photoreceptor          |
| TTTCCTCG db/m1 | db/m | 5503 | 0.044326 | FALSE | 0.987426 | FALSE | Endothelia Venous EC   |
| TTTCGATA db/m1 | db/m | 366  | 0.061912 | FALSE | 2.8894   | FALSE | Endothelia Capillary E |
| TTTCGATA db/m1 | db/m | 721  | 0.057037 | FALSE | 2.167283 | FALSE | Photoreceptor          |
| TTTCGATC db/m1 | db/m | 722  | 0.015581 | FALSE | 1.944268 | FALSE | Photoreceptor          |
| TTTCGATT db/m1 | db/m | 803  | 0.095727 | FALSE | 14.01138 | TRUE  |                        |
| TTTCGATT db/m1 | db/m | 1167 | 0.046025 | FALSE | 2.348977 | FALSE | Photoreceptor          |
| TTTGACTA db/m1 | db/m | 3202 | 0.042704 | FALSE | 1.919608 | FALSE | Photoreceptor          |
| TTTGACTA db/m1 | db/m | 758  | 0.059406 | FALSE | 1.500295 | FALSE | Photoreceptor          |
| TTTGACTC db/m1 | db/m | 1546 | 0.093319 | FALSE | 1.23229  | FALSE | Photoreceptor          |
| TTTGACTT db/m1 | db/m | 426  | 0.019455 | FALSE | 1.791857 | FALSE | Photoreceptor          |
| TTTGATCA db/m1 | db/m | 7228 | 0.010384 | FALSE | 0.918622 | FALSE | Photoreceptor          |
| TTTGATCC db/m1 | db/m | 1344 | 0.031973 | FALSE | 0.568545 | FALSE | Photoreceptor          |
| TTTGATCG db/m1 | db/m | 1320 | 0.112037 | TRUE  | 4.340568 | FALSE |                        |
| TTTGATCG db/m1 | db/m | 1146 | 0.009063 | FALSE | 1.606962 | FALSE | Endothelia Capillary E |
| TTTGATCG db/m1 | db/m | 1877 | 0.047807 | FALSE | 1.749868 | FALSE | Photoreceptor          |
| TTTGATCG db/m1 | db/m | 1406 | 0.025868 | FALSE | 1.616556 | FALSE | Photoreceptor          |
| TTTGATCT db/m1 | db/m | 450  | 0.036232 | FALSE | 3.968739 | FALSE | Muller cell            |
| TTTGGAG db/m1  | db/m | 1400 | 0.03313  | FALSE | 0.813693 | FALSE | Photoreceptor          |
| TTTGGAG db/m1  | db/m | 738  | 0.088776 | FALSE | 2.15178  | FALSE | Photoreceptor          |
| TTTGGAG db/m1  | db/m | 3748 | 0.04192  | FALSE | 1.158259 | FALSE | Photoreceptor          |
| TTTGGAG db/m1  | db/m | 590  | 0.184701 | TRUE  | 7.429245 | TRUE  |                        |
| TTTGGTTA db/m1 | db/m | 580  | 0.020908 | FALSE | 0.612373 | FALSE | Photoreceptor          |
| TTTGGTTA db/m1 | db/m | 1267 | 0.076994 | FALSE | 1.504241 | FALSE | Photoreceptor          |
| TTTGGTTC db/m1 | db/m | 1382 | 0.012052 | FALSE | 1.390879 | FALSE | Endothelia Capillary E |
| TTTGGTTG db/m1 | db/m | 1056 | 0.045165 | FALSE | 0.287881 | FALSE | Photoreceptor          |
| TTTGGTTT db/m1 | db/m | 3579 | 0.027758 | FALSE | 2.059489 | FALSE | Muller cell            |
| TTTGTGA db/m1  | db/m | 7961 | 0.014429 | FALSE | 0.808428 | FALSE | Photoreceptor          |
| TTTGTGA db/m1  | db/m | 424  | 0.051646 | FALSE | 3.087503 | FALSE | Muller cell            |
| TTTGTGA db/m1  | db/m | 1553 | 0.031973 | FALSE | 0.723105 | FALSE | Photoreceptor          |
| TTTGTGA db/m1  | db/m | 1732 | 0.114406 | TRUE  | 4.793725 | FALSE |                        |
| TTTGTGTC db/m1 | db/m | 1615 | 0.041154 | FALSE | 1.309884 | FALSE | Photoreceptor          |
| TTTGTGTC db/m1 | db/m | 5242 | 0.065957 | FALSE | 0.541412 | FALSE | Photoreceptor          |
| TTTGTGG db/m1  | db/m | 455  | 0.027758 | FALSE | 64.62622 | TRUE  |                        |



|                |      |      |          |       |          |       |                        |
|----------------|------|------|----------|-------|----------|-------|------------------------|
| TTTGTGG db/m1  | db/m | 1498 | 0.107669 | TRUE  | 2.446589 | FALSE |                        |
| TTTGTGG db/m1  | db/m | 2737 | 0.055901 | FALSE | 1.597004 | FALSE | Photoreceptor          |
| TTTGTGT db/m1  | db/m | 5440 | 0.024971 | FALSE | 0.68876  | FALSE | Photoreceptor          |
| AAACCCAC db/m2 | db/m | 2602 | 0.013338 | FALSE | 1.312914 | FALSE | Photoreceptor          |
| AAACCCAC db/m2 | db/m | 7461 | 0.018088 | FALSE | 0.65878  | FALSE | Photoreceptor          |
| AAACGAA db/m2  | db/m | 3613 | 0.031973 | FALSE | 1.112022 | FALSE | Photoreceptor          |
| AAACGAA db/m2  | db/m | 3210 | 0.039671 | FALSE | 0.861461 | FALSE | Photoreceptor          |
| AAACGAA db/m2  | db/m | 422  | 0.013074 | FALSE | 42.91417 | TRUE  |                        |
| AAACGAA db/m2  | db/m | 193  | 0.012052 | FALSE | 77.0217  | TRUE  |                        |
| AAACGAA db/m2  | db/m | 1524 | 0.030318 | FALSE | 1.96986  | FALSE | Endothelia Aterial EC  |
| AAACGCTC db/m2 | db/m | 925  | 0.046906 | FALSE | 16.51376 | TRUE  |                        |
| AAACGCTT db/m2 | db/m | 359  | 0.036891 | FALSE | 33.33334 | TRUE  |                        |
| AAAGAAC db/m2  | db/m | 5685 | 0.025868 | FALSE | 0.956828 | FALSE | Photoreceptor          |
| AAAGAAC db/m2  | db/m | 2572 | 0.040404 | FALSE | 1.267064 | FALSE | Photoreceptor          |
| AAAGAAC db/m2  | db/m | 4853 | 0.052669 | FALSE | 2.293005 | FALSE | Neuron                 |
| AAAGAAC db/m2  | db/m | 6489 | 0.115723 | TRUE  | 1.372817 | FALSE |                        |
| AAAGAAC db/m2  | db/m | 717  | 0.012052 | FALSE | 47.30752 | TRUE  |                        |
| AAAGGATC db/m2 | db/m | 2754 | 0.059406 | FALSE | 1.275186 | FALSE | Neuron                 |
| AAAGGATC db/m2 | db/m | 1186 | 0.073582 | FALSE | 1.745752 | FALSE | Photoreceptor          |
| AAAGGATC db/m2 | db/m | 1335 | 0.018761 | FALSE | 2.496082 | FALSE | Photoreceptor          |
| AAAGGATC db/m2 | db/m | 564  | 0.035586 | FALSE | 34.73862 | TRUE  |                        |
| AAAGGATC db/m2 | db/m | 4683 | 0.027758 | FALSE | 1.112409 | FALSE | Photoreceptor          |
| AAAGGAT db/m2  | db/m | 1030 | 0.009063 | FALSE | 2.362691 | FALSE | Neuron                 |
| AAAGGGC db/m2  | db/m | 1907 | 0.016488 | FALSE | 1.558774 | FALSE | Photoreceptor          |
| AAAGGGC db/m2  | db/m | 1165 | 0.029787 | FALSE | 0.829188 | FALSE | Photoreceptor          |
| AAAGGGC db/m2  | db/m | 2571 | 0.135645 | TRUE  | 3.910615 | FALSE |                        |
| AAAGTCCC db/m2 | db/m | 319  | 0.011319 | FALSE | 57.68845 | TRUE  |                        |
| AAAGTCCC db/m2 | db/m | 722  | 0.021286 | FALSE | 0.429371 | FALSE | Pericyte               |
| AAAGTGA db/m2  | db/m | 556  | 0.024971 | FALSE | 35.11648 | TRUE  |                        |
| AAAGTGA db/m2  | db/m | 715  | 0.05065  | FALSE | 2.223313 | FALSE | Photoreceptor          |
| AAAGTGA db/m2  | db/m | 1470 | 0.026328 | FALSE | 2.083581 | FALSE | Photoreceptor          |
| AAATGGA db/m2  | db/m | 376  | 0.013876 | FALSE | 49.61326 | TRUE  |                        |
| AAATGGA db/m2  | db/m | 647  | 0.019455 | FALSE | 37.38128 | TRUE  |                        |
| AAATGGA db/m2  | db/m | 794  | 0.093319 | FALSE | 4.57087  | FALSE | Muller cell            |
| AACAAAGC db/m2 | db/m | 4888 | 0.030318 | FALSE | 1.306628 | FALSE | Endothelia Capillary E |
| AACAAAGC db/m2 | db/m | 452  | 0.017434 | FALSE | 55.28701 | TRUE  |                        |
| AACAACCA db/m2 | db/m | 3569 | 0.005958 | FALSE | 0.959547 | FALSE | Neuron                 |
| AACAACCA db/m2 | db/m | 566  | 0.024971 | FALSE | 4.614882 | FALSE | Muller cell            |
| AACAACCA db/m2 | db/m | 622  | 0.031411 | FALSE | 4.185364 | FALSE | Photoreceptor          |
| AACAACCC db/m2 | db/m | 658  | 0.015287 | FALSE | 0.93143  | FALSE | Photoreceptor          |
| AACAACCT db/m2 | db/m | 3417 | 0.025416 | FALSE | 1.090534 | FALSE | Endothelia Capillary E |
| AACAACCT db/m2 | db/m | 3423 | 0.009277 | FALSE | 1.39561  | FALSE | Photoreceptor          |
| AACAAGA db/m2  | db/m | 262  | 0.023682 | FALSE | 46.11212 | TRUE  |                        |
| AACAAGA db/m2  | db/m | 1084 | 0.049679 | FALSE | 1.832262 | FALSE | Photoreceptor          |
| AACACACC db/m2 | db/m | 1138 | 0.108718 | TRUE  | 4.57478  | FALSE |                        |
| AACACACC db/m2 | db/m | 3811 | 0.053718 | FALSE | 1.322739 | FALSE | Photoreceptor          |
| AACAGGG db/m2  | db/m | 4193 | 0.122691 | TRUE  | 2.658758 | FALSE |                        |

|                |      |      |          |       |          |       |                        |
|----------------|------|------|----------|-------|----------|-------|------------------------|
| AACAGGG.db/m2  | db/m | 475  | 0.033726 | FALSE | 1.986135 | FALSE | Endothelia Capillary E |
| AACAGGG.db/m2  | db/m | 5862 | 0.034954 | FALSE | 1.245387 | FALSE | Endothelia Venous EC   |
| AACAGGG.db/m2  | db/m | 941  | 0.030859 | FALSE | 3.339767 | FALSE | Pericyte               |
| AACAGGG.db/m2  | db/m | 3538 | 0.023266 | FALSE | 0.409595 | FALSE | Photoreceptor          |
| AACAGGG.db/m2  | db/m | 2649 | 0.024105 | FALSE | 1.335255 | FALSE | Photoreceptor          |
| AACCAACT.db/m2 | db/m | 592  | 0.019106 | FALSE | 1.271541 | FALSE | Photoreceptor          |
| AACCAACT.db/m2 | db/m | 251  | 0.011081 | FALSE | 67.76181 | TRUE  |                        |
| AACCAACT.db/m2 | db/m | 1477 | 0.021669 | FALSE | 1.925046 | FALSE | Photoreceptor          |
| AACCACA.db/m2  | db/m | 748  | 0.064568 | FALSE | 2.156844 | FALSE | Muller cell            |
| AACCACA.db/m2  | db/m | 1915 | 0.027273 | FALSE | 1.831173 | FALSE | Photoreceptor          |
| AACCACAT.db/m2 | db/m | 412  | 0.031411 | FALSE | 24.26901 | TRUE  |                        |
| AACCACAT.db/m2 | db/m | 5755 | 0.049679 | FALSE | 1.016279 | FALSE | Photoreceptor          |
| AACCATGC.db/m2 | db/m | 5808 | 0.016181 | FALSE | 0.847818 | FALSE | Endothelia Venous EC   |
| AACCATGC.db/m2 | db/m | 1113 | 0.109375 | TRUE  | 2.271369 | FALSE |                        |
| AACCATGC.db/m2 | db/m | 1454 | 0.088776 | FALSE | 1.511925 | FALSE | Photoreceptor          |
| AACCATGC.db/m2 | db/m | 2235 | 0.016181 | FALSE | 1.404883 | FALSE | Endothelia Capillary E |
| AACCCAA.db/m2  | db/m | 7110 | 0.033726 | FALSE | 1.021784 | FALSE | Photoreceptor          |
| AACCCAA.db/m2  | db/m | 4860 | 0.014997 | FALSE | 1.216289 | FALSE | Endothelia Venous EC   |
| AACCCAA.db/m2  | db/m | 449  | 0.060641 | FALSE | 1.956632 | FALSE | Neuron                 |
| AACCCAA.db/m2  | db/m | 884  | 0.093319 | FALSE | 4.098316 | FALSE | Muller cell            |
| AACCCAA.db/m2  | db/m | 1214 | 0.015879 | FALSE | 0.583508 | FALSE | Photoreceptor          |
| AACCCAA.db/m2  | db/m | 719  | 0.011805 | FALSE | 52.09402 | TRUE  |                        |
| AACCCAAT.db/m2 | db/m | 577  | 0.017758 | FALSE | 2.822601 | FALSE | Muller cell            |
| AACCTGA.db/m2  | db/m | 6553 | 0.049679 | FALSE | 1.190424 | FALSE | Photoreceptor          |
| AACCTGA.db/m2  | db/m | 2527 | 0.053718 | FALSE | 1.215995 | FALSE | Photoreceptor          |
| AACCTGAT.db/m2 | db/m | 1266 | 0.045165 | FALSE | 2.932048 | FALSE | Muller cell            |
| AACCTTTA.db/m2 | db/m | 7607 | 0.053718 | FALSE | 1.293415 | FALSE | Photoreceptor          |
| AACCTTTC.db/m2 | db/m | 4027 | 0.054795 | FALSE | 1.542653 | FALSE | Photoreceptor          |
| AACCTTTT.db/m2 | db/m | 692  | 0.08663  | FALSE | 10.19856 | TRUE  |                        |
| AACCTTTT.db/m2 | db/m | 3026 | 0.049679 | FALSE | 1.434002 | FALSE | Photoreceptor          |
| AACCTTTT.db/m2 | db/m | 4173 | 0.029266 | FALSE | 1.411974 | FALSE | Endothelia Aterial EC  |
| AACCTTTT.db/m2 | db/m | 3294 | 0.008644 | FALSE | 1.65081  | FALSE | Photoreceptor          |
| AACGAAA.db/m2  | db/m | 752  | 0.040404 | FALSE | 4.431205 | FALSE | Muller cell            |
| AACGAAA.db/m2  | db/m | 991  | 0.036232 | FALSE | 0.961778 | FALSE | Photoreceptor          |
| AACGAAA.db/m2  | db/m | 1414 | 0.023266 | FALSE | 1.377529 | FALSE | Photoreceptor          |
| AACGAAA.db/m2  | db/m | 976  | 0.08663  | FALSE | 2.530674 | FALSE | Muller cell            |
| AACGGGA.db/m2  | db/m | 617  | 0.017758 | FALSE | 3.898365 | FALSE | Muller cell            |
| AACGGGA.db/m2  | db/m | 1145 | 0.112477 | TRUE  | 14.59434 | TRUE  |                        |
| AACGGGA.db/m2  | db/m | 386  | 0.040404 | FALSE | 47.42489 | TRUE  |                        |
| AACGGGA.db/m2  | db/m | 7529 | 0.028251 | FALSE | 1.186085 | FALSE | Photoreceptor          |
| AACGGGA.db/m2  | db/m | 740  | 0.047807 | FALSE | 2.747704 | FALSE | Muller cell            |
| AACGGGA.db/m2  | db/m | 1824 | 0.010614 | FALSE | 1.396985 | FALSE | Photoreceptor          |
| AACGTCAT.db/m2 | db/m | 2494 | 0.039671 | FALSE | 1.633391 | FALSE | Photoreceptor          |
| AACTTCTC.db/m2 | db/m | 2823 | 0.017758 | FALSE | 1.374864 | FALSE | Endothelia Capillary E |
| AACTTCTG.db/m2 | db/m | 569  | 0.084562 | FALSE | 12.40786 | TRUE  |                        |
| AACTTCTG.db/m2 | db/m | 287  | 0.192271 | TRUE  | 50.3864  | TRUE  |                        |
| AACTTCTT.db/m2 | db/m | 361  | 0.034334 | FALSE | 4.659671 | FALSE | Photoreceptor          |

|                |      |      |          |       |          |       |                        |
|----------------|------|------|----------|-------|----------|-------|------------------------|
| AAGAACA/ db/m2 | db/m | 1230 | 0.023266 | FALSE | 0.321117 | FALSE | Photoreceptor          |
| AAGAACA( db/m2 | db/m | 1261 | 0.042704 | FALSE | 1.767454 | FALSE | Photoreceptor          |
| AAGAACA^ db/m2 | db/m | 334  | 0.023682 | FALSE | 32.7674  | TRUE  |                        |
| AAGACAA( db/m2 | db/m | 333  | 0.013876 | FALSE | 52.1327  | TRUE  |                        |
| AAGACAA^ db/m2 | db/m | 1029 | 0.01981  | FALSE | 0.085761 | FALSE | Photoreceptor          |
| AAGACTCC db/m2 | db/m | 1901 | 0.025416 | FALSE | 2.175002 | FALSE | Endothelia Capillary E |
| AAGACTCC db/m2 | db/m | 451  | 0.03313  | FALSE | 4.286016 | FALSE | Muller cell            |
| AAGACTCC db/m2 | db/m | 7817 | 0.03313  | FALSE | 1.077934 | FALSE | Photoreceptor          |
| AAGACTCC db/m2 | db/m | 507  | 0.035586 | FALSE | 1.64725  | FALSE | Microglia              |
| AAGACTCC db/m2 | db/m | 480  | 0.018422 | FALSE | 1.601708 | FALSE | Photoreceptor          |
| AAGATAG/ db/m2 | db/m | 1328 | 0.043505 | FALSE | 0.748611 | FALSE | Photoreceptor          |
| AAGATAG/ db/m2 | db/m | 1838 | 0.033726 | FALSE | 1.803988 | FALSE | Photoreceptor          |
| AAGATAG( db/m2 | db/m | 542  | 0.019106 | FALSE | 0.696804 | FALSE | Photoreceptor          |
| AAGATAG( db/m2 | db/m | 7356 | 0.012814 | FALSE | 0.892085 | FALSE | Photoreceptor          |
| AAGATAG( db/m2 | db/m | 371  | 0.03313  | FALSE | 3.949058 | FALSE | Photoreceptor          |
| AAGCATC/ db/m2 | db/m | 2343 | 0.04192  | FALSE | 1.839788 | FALSE | Endothelia Venous EC   |
| AAGCATC/ db/m2 | db/m | 2031 | 0.043505 | FALSE | 0.828964 | FALSE | Photoreceptor          |
| AAGCATC/ db/m2 | db/m | 592  | 0.034334 | FALSE | 3.703155 | FALSE | Muller cell            |
| AAGCATCC db/m2 | db/m | 1765 | 0.064568 | FALSE | 1.72119  | FALSE | Photoreceptor          |
| AAGCATCT db/m2 | db/m | 5852 | 0.03313  | FALSE | 0.923215 | FALSE | Photoreceptor          |
| AAGCCAT/ db/m2 | db/m | 753  | 0.015581 | FALSE | 3.126474 | FALSE | Endothelia Capillary E |
| AAGCCAT/ db/m2 | db/m | 4554 | 0.012814 | FALSE | 1.133952 | FALSE | Photoreceptor          |
| AAGCCAT/ db/m2 | db/m | 3088 | 0.009933 | FALSE | 1.27578  | FALSE | Photoreceptor          |
| AAGCCAT( db/m2 | db/m | 2675 | 0.025416 | FALSE | 1.826562 | FALSE | Endothelia Aterial EC  |
| AAGCCAT( db/m2 | db/m | 911  | 0.052669 | FALSE | 22.34957 | TRUE  |                        |
| AAGCCATT db/m2 | db/m | 2604 | 0.031973 | FALSE | 0.533859 | FALSE | Photoreceptor          |
| AAGCCATT db/m2 | db/m | 2953 | 0.030859 | FALSE | 1.15826  | FALSE | Photoreceptor          |
| AAGCCATT db/m2 | db/m | 1423 | 0.126958 | TRUE  | 4.786954 | FALSE |                        |
| AAGCGAG/ db/m2 | db/m | 8258 | 0.033726 | FALSE | 0.889038 | FALSE | Photoreceptor          |
| AAGCGAG/ db/m2 | db/m | 190  | 0.106646 | TRUE  | 0.123469 | FALSE |                        |
| AAGCGAG/ db/m2 | db/m | 604  | 0.013338 | FALSE | 43.9829  | TRUE  |                        |
| AAGCGAG/ db/m2 | db/m | 1173 | 0.040404 | FALSE | 1.593212 | FALSE | Photoreceptor          |
| AAGCGAG( db/m2 | db/m | 433  | 0.057037 | FALSE | 39.15789 | TRUE  |                        |
| AAGCGAG( db/m2 | db/m | 1247 | 0.070386 | FALSE | 2.069194 | FALSE | Photoreceptor          |
| AAGCGTT/ db/m2 | db/m | 503  | 0.035586 | FALSE | 3.017099 | FALSE | Muller cell            |
| AAGCGTT( db/m2 | db/m | 2438 | 0.038251 | FALSE | 1.356937 | FALSE | Photoreceptor          |
| AAGCGTTI db/m2 | db/m | 7821 | 0.036232 | FALSE | 0.804906 | FALSE | Photoreceptor          |
| AAGGAAT( db/m2 | db/m | 2486 | 0.024534 | FALSE | 0.975861 | FALSE | Photoreceptor          |
| AAGGAAT^ db/m2 | db/m | 669  | 0.047807 | FALSE | 4.493479 | FALSE | Endothelia Capillary E |
| AAGGAAT^ db/m2 | db/m | 659  | 0.036232 | FALSE | 4.340195 | FALSE | Muller cell            |
| AAGGTAA/ db/m2 | db/m | 3027 | 0.053718 | FALSE | 1.899381 | FALSE | Microglia              |
| AAGGTAA( db/m2 | db/m | 3061 | 0.093319 | FALSE | 1.344291 | FALSE | Photoreceptor          |
| AAGGTAA( db/m2 | db/m | 5999 | 0.038251 | FALSE | 0.957603 | FALSE | Photoreceptor          |
| AAGTACC/ db/m2 | db/m | 564  | 0.021286 | FALSE | 1.264529 | FALSE | Photoreceptor          |
| AAGTACCC db/m2 | db/m | 414  | 0.013876 | FALSE | 54.59098 | TRUE  |                        |
| AAGTACCC db/m2 | db/m | 518  | 0.095727 | FALSE | 2.649492 | FALSE | Endothelia Capillary E |
| AAGTACCC db/m2 | db/m | 997  | 0.071958 | FALSE | 2.225015 | FALSE | Photoreceptor          |

|                |      |      |          |       |          |       |                         |
|----------------|------|------|----------|-------|----------|-------|-------------------------|
| AAGTACCC db/m2 | db/m | 1562 | 0.039671 | FALSE | 3.805456 | FALSE | Muller cell             |
| AAGTACCC db/m2 | db/m | 414  | 0.039671 | FALSE | 36.99095 | TRUE  |                         |
| AAGTACCT db/m2 | db/m | 3103 | 0.058205 | FALSE | 1.601774 | FALSE | Photoreceptor           |
| AAGTCGT db/m2  | db/m | 955  | 0.019455 | FALSE | 41.60851 | TRUE  |                         |
| AAGTTCG db/m2  | db/m | 1233 | 0.012303 | FALSE | 1.032964 | FALSE | Endothelia Venous EC    |
| AAGTTCG db/m2  | db/m | 8646 | 0.034954 | FALSE | 0.620515 | FALSE | Photoreceptor           |
| AAGTTCGT db/m2 | db/m | 933  | 0.093319 | FALSE | 15.3337  | TRUE  |                         |
| AAGTTCGT db/m2 | db/m | 1236 | 0.098234 | FALSE | 2.56064  | FALSE | Endothelia Capillary EC |
| AATAGAG db/m2  | db/m | 587  | 0.009063 | FALSE | 50.45141 | TRUE  |                         |
| AATAGAG db/m2  | db/m | 365  | 0.022857 | FALSE | 4.429825 | FALSE | Endothelia Capillary EC |
| AATAGAG db/m2  | db/m | 398  | 0.025868 | FALSE | 37.51494 | TRUE  |                         |
| AATCGAC db/m2  | db/m | 450  | 0.018422 | FALSE | 3.493793 | FALSE | Endothelia Capillary EC |
| AATCGAC db/m2  | db/m | 3094 | 0.021286 | FALSE | 1.458233 | FALSE | Endothelia Capillary EC |
| AATCGACC db/m2 | db/m | 536  | 0.01981  | FALSE | 46.37584 | TRUE  |                         |
| AATCGACT db/m2 | db/m | 2090 | 0.022857 | FALSE | 4.446304 | FALSE | Muller cell             |
| AATCGTGC db/m2 | db/m | 1236 | 0.01981  | FALSE | 1.907362 | FALSE | Endothelia Capillary EC |
| AATCGTGT db/m2 | db/m | 5171 | 0.13452  | TRUE  | 2.501094 | FALSE |                         |
| AATGAAG db/m2  | db/m | 753  | 0.008234 | FALSE | 1.900813 | FALSE | Endothelia Capillary EC |
| AATGAAG db/m2  | db/m | 2958 | 0.071958 | FALSE | 2.034422 | FALSE | Neuron                  |
| AATGAAG db/m2  | db/m | 3738 | 0.034954 | FALSE | 1.328773 | FALSE | Photoreceptor           |
| AATGAAG db/m2  | db/m | 8202 | 0.029787 | FALSE | 0.746215 | FALSE | Photoreceptor           |
| AATGAAG db/m2  | db/m | 976  | 0.095727 | FALSE | 2.447707 | FALSE | Endothelia Aterial EC   |
| AATGACC db/m2  | db/m | 5539 | 0.012814 | FALSE | 1.253479 | FALSE | Photoreceptor           |
| AATGCCAC db/m2 | db/m | 1663 | 0.018761 | FALSE | 1.323798 | FALSE | Endothelia Capillary EC |
| AATGCCAC db/m2 | db/m | 321  | 0.031411 | FALSE | 4.972345 | FALSE | Muller cell             |
| AATGGAA db/m2  | db/m | 353  | 0.024534 | FALSE | 26.18243 | TRUE  |                         |
| AATGGAA db/m2  | db/m | 370  | 0.033726 | FALSE | 2.01967  | FALSE | Photoreceptor           |
| AATGGCT db/m2  | db/m | 2855 | 0.027273 | FALSE | 1.384122 | FALSE | Pericyte                |
| AATGGCT db/m2  | db/m | 1424 | 0.060641 | FALSE | 1.525398 | FALSE | Photoreceptor           |
| AATGGCT db/m2  | db/m | 7995 | 0.013074 | FALSE | 0.884978 | FALSE | Photoreceptor           |
| AATGGCT db/m2  | db/m | 2914 | 0.071958 | FALSE | 1.120826 | FALSE | Photoreceptor           |
| AATGGCT db/m2  | db/m | 1717 | 0.034954 | FALSE | 1.911027 | FALSE | Photoreceptor           |
| ACAAAGA db/m2  | db/m | 938  | 0.038251 | FALSE | 35.78826 | TRUE  |                         |
| ACAAAGA db/m2  | db/m | 2047 | 0.060641 | FALSE | 1.859569 | FALSE | Photoreceptor           |
| ACAACCAC db/m2 | db/m | 2858 | 0.034954 | FALSE | 1.70754  | FALSE | Photoreceptor           |
| ACAAGCT db/m2  | db/m | 154  | 0.016181 | FALSE | 75.75343 | TRUE  |                         |
| ACAAGCT db/m2  | db/m | 1706 | 0.019455 | FALSE | 1.533433 | FALSE | Endothelia Capillary EC |
| ACAAGCT db/m2  | db/m | 2183 | 0.011561 | FALSE | 0.912709 | FALSE | Photoreceptor           |
| ACACAGT db/m2  | db/m | 6760 | 0.018761 | FALSE | 0.585136 | FALSE | Photoreceptor           |
| ACACAGT db/m2  | db/m | 4411 | 0.010614 | FALSE | 0.968257 | FALSE | Photoreceptor           |
| ACACAGT db/m2  | db/m | 469  | 0.022059 | FALSE | 53.96733 | TRUE  |                         |
| ACACAGT db/m2  | db/m | 457  | 0.014429 | FALSE | 3.409216 | FALSE | Photoreceptor           |
| ACACCAA db/m2  | db/m | 3067 | 0.003196 | FALSE | 1.423872 | FALSE | Neuron                  |
| ACACCAAC db/m2 | db/m | 385  | 0.023682 | FALSE | 4.155324 | FALSE | Pericyte                |
| ACACCAAC db/m2 | db/m | 494  | 0.067388 | FALSE | 18.86336 | TRUE  |                         |
| ACACCAAC db/m2 | db/m | 3944 | 0.004116 | FALSE | 1.105403 | FALSE | Neuron                  |
| ACACCAAC db/m2 | db/m | 323  | 0.054795 | FALSE | 45.14067 | TRUE  |                         |

|                |      |      |          |       |          |       |                         |
|----------------|------|------|----------|-------|----------|-------|-------------------------|
| ACACCAAC db/m2 | db/m | 413  | 0.031973 | FALSE | 36.90323 | TRUE  |                         |
| ACACGCG db/m2  | db/m | 871  | 0.034334 | FALSE | 1.095234 | FALSE | Photoreceptor           |
| ACACGCG db/m2  | db/m | 2126 | 0.093319 | FALSE | 2.123836 | FALSE | Photoreceptor           |
| ACACGCG db/m2  | db/m | 1087 | 0.045165 | FALSE | 4.025574 | FALSE | Muller cell             |
| ACACGCG db/m2  | db/m | 1700 | 0.019106 | FALSE | 0.987675 | FALSE | Photoreceptor           |
| ACACTGA db/m2  | db/m | 1660 | 0.070386 | FALSE | 1.059506 | FALSE | Photoreceptor           |
| ACACTGAT db/m2 | db/m | 6192 | 0.080645 | FALSE | 1.35539  | FALSE | Photoreceptor           |
| ACAGAAA db/m2  | db/m | 2154 | 0.030318 | FALSE | 1.557242 | FALSE | Endothelia Venous EC    |
| ACAGAAA db/m2  | db/m | 2064 | 0.034334 | FALSE | 1.174968 | FALSE | Photoreceptor           |
| ACAGAAA db/m2  | db/m | 584  | 0.010157 | FALSE | 2.790186 | FALSE | Endothelia Capillary EC |
| ACAGAAA db/m2  | db/m | 433  | 0.009493 | FALSE | 57.24432 | TRUE  |                         |
| ACAGCCG db/m2  | db/m | 1496 | 0.04192  | FALSE | 0.581306 | FALSE | Photoreceptor           |
| ACAGGGA db/m2  | db/m | 400  | 0.084562 | FALSE | 4.425491 | FALSE | Endothelia Capillary EC |
| ACATCCCG db/m2 | db/m | 2891 | 0.014711 | FALSE | 1.201099 | FALSE | Photoreceptor           |
| ACATCCCG db/m2 | db/m | 1184 | 0.084562 | FALSE | 1.148827 | FALSE | Photoreceptor           |
| ACATGCA db/m2  | db/m | 886  | 0.070386 | FALSE | 4.518898 | FALSE | Muller cell             |
| ACATGCA db/m2  | db/m | 267  | 0.046906 | FALSE | 35.90226 | TRUE  |                         |
| ACATGCA db/m2  | db/m | 769  | 0.034334 | FALSE | 0.332745 | FALSE | Photoreceptor           |
| ACATGCA db/m2  | db/m | 2031 | 0.082569 | FALSE | 2.675719 | FALSE | Photoreceptor           |
| ACATGCA db/m2  | db/m | 9008 | 0.019106 | FALSE | 0.743258 | FALSE | Photoreceptor           |
| ACATGCA db/m2  | db/m | 1222 | 0.028754 | FALSE | 0.550483 | FALSE | Photoreceptor           |
| ACATGCAT db/m2 | db/m | 5055 | 0.034334 | FALSE | 1.513456 | FALSE | Neuron                  |
| ACATTTCA db/m2 | db/m | 1334 | 0.018422 | FALSE | 0.977485 | FALSE | Photoreceptor           |
| ACATTTCG db/m2 | db/m | 462  | 0.037564 | FALSE | 1.472476 | FALSE | Muller cell             |
| ACATTTCG db/m2 | db/m | 1431 | 0.006499 | FALSE | 1.532829 | FALSE | Endothelia Capillary EC |
| ACATTTCT db/m2 | db/m | 2999 | 0.016799 | FALSE | 1.297037 | FALSE | Endothelia Capillary EC |
| ACCAAACC db/m2 | db/m | 3020 | 0.054795 | FALSE | 1.354781 | FALSE | Photoreceptor           |
| ACCAAACC db/m2 | db/m | 1007 | 0.078788 | FALSE | 3.260761 | FALSE | Endothelia Venous EC    |
| ACCAACA db/m2  | db/m | 257  | 0.106646 | TRUE  | 0.197493 | FALSE |                         |
| ACCAACA db/m2  | db/m | 1716 | 0.023266 | FALSE | 2.251326 | FALSE | Muller cell             |
| ACCAACAT db/m2 | db/m | 519  | 0.022455 | FALSE | 1.644818 | FALSE | Photoreceptor           |
| ACCAACAT db/m2 | db/m | 5380 | 0.013605 | FALSE | 0.939323 | FALSE | Endothelia Capillary EC |
| ACCACAA db/m2  | db/m | 1832 | 0.082569 | FALSE | 2.104719 | FALSE | Pericyte                |
| ACCACAA db/m2  | db/m | 6700 | 0.029787 | FALSE | 1.144092 | FALSE | Endothelia Venous EC    |
| ACCACAAT db/m2 | db/m | 1011 | 0.023682 | FALSE | 2.299501 | FALSE | Neuron                  |
| ACCATTTA db/m2 | db/m | 8307 | 0.034334 | FALSE | 0.935597 | FALSE | Photoreceptor           |
| ACCATTTA db/m2 | db/m | 516  | 0.040404 | FALSE | 6.910569 | TRUE  |                         |
| ACCATTTA db/m2 | db/m | 5919 | 0.014151 | FALSE | 0.941198 | FALSE | Endothelia Venous EC    |
| ACCATTTC db/m2 | db/m | 4818 | 0.012814 | FALSE | 1.134225 | FALSE | Photoreceptor           |
| ACCATTTC db/m2 | db/m | 527  | 0.057037 | FALSE | 2.819611 | FALSE | Endothelia Capillary EC |
| ACCATTTC db/m2 | db/m | 418  | 0.016799 | FALSE | 4.676225 | FALSE | Pericyte                |
| ACCATTTC db/m2 | db/m | 2796 | 0.082569 | FALSE | 1.953944 | FALSE | Endothelia Capillary EC |
| ACCCAAA db/m2  | db/m | 2788 | 0.009493 | FALSE | 1.335397 | FALSE | Photoreceptor           |
| ACCCAAA db/m2  | db/m | 617  | 0.091004 | FALSE | 4.864295 | FALSE | Muller cell             |
| ACCCAAA db/m2  | db/m | 207  | 0.009933 | FALSE | 71.95767 | TRUE  |                         |
| ACCCAAA db/m2  | db/m | 224  | 0.110901 | TRUE  | 0.512821 | FALSE |                         |
| ACCCAAAT db/m2 | db/m | 6102 | 0.031973 | FALSE | 1.097484 | FALSE | Photoreceptor           |

|                |      |      |          |       |          |       |                        |
|----------------|------|------|----------|-------|----------|-------|------------------------|
| ACCCTCAA db/m2 | db/m | 2559 | 0.076994 | FALSE | 12.08376 | TRUE  |                        |
| ACCCTCAG db/m2 | db/m | 737  | 0.057037 | FALSE | 3.813479 | FALSE | Photoreceptor          |
| ACCCTTGA db/m2 | db/m | 1061 | 0.041154 | FALSE | 0.748419 | FALSE | Photoreceptor          |
| ACCCTTGA db/m2 | db/m | 1372 | 0.048732 | FALSE | 2.018114 | FALSE | Photoreceptor          |
| ACCCTTGC db/m2 | db/m | 548  | 0.013605 | FALSE | 0.3285   | FALSE | Endothelia Capillary E |
| ACCCTTGC db/m2 | db/m | 274  | 0.027273 | FALSE | 62.12814 | TRUE  |                        |
| ACCCTTGT db/m2 | db/m | 370  | 0.032546 | FALSE | 21.06136 | TRUE  |                        |
| ACCCTTGT db/m2 | db/m | 3724 | 0.021669 | FALSE | 1.34701  | FALSE | Endothelia Venous EC   |
| ACCGTTCA db/m2 | db/m | 426  | 0.027273 | FALSE | 58.78833 | TRUE  |                        |
| ACCGTTCT db/m2 | db/m | 615  | 0.011805 | FALSE | 2.264175 | FALSE | Photoreceptor          |
| ACCTACCA db/m2 | db/m | 926  | 0.057037 | FALSE | 2.304551 | FALSE | Endothelia Capillary E |
| ACCTACCA db/m2 | db/m | 227  | 0.046025 | FALSE | 1.924601 | FALSE | Muller cell            |
| ACCTACCG db/m2 | db/m | 1028 | 0.030318 | FALSE | 2.055984 | FALSE | Muller cell            |
| ACCTACCG db/m2 | db/m | 2558 | 0.057037 | FALSE | 1.899061 | FALSE | Muller cell            |
| ACCTACCT db/m2 | db/m | 1078 | 0.028251 | FALSE | 0.323898 | FALSE | Photoreceptor          |
| ACCTGAA db/m2  | db/m | 1801 | 0.054795 | FALSE | 2.758187 | FALSE | Photoreceptor          |
| ACCTGAAC db/m2 | db/m | 449  | 0.022059 | FALSE | 1.729671 | FALSE | Photoreceptor          |
| ACCTGAAC db/m2 | db/m | 5017 | 0.037564 | FALSE | 1.320449 | FALSE | Photoreceptor          |
| ACCTGAAT db/m2 | db/m | 4136 | 0.075259 | FALSE | 2.180942 | FALSE | Muller cell            |
| ACCTGTCC db/m2 | db/m | 1556 | 0.029787 | FALSE | 2.432996 | FALSE | Pericyte               |
| ACCTGTCC db/m2 | db/m | 522  | 0.038953 | FALSE | 36.76976 | TRUE  |                        |
| ACCTGTCT db/m2 | db/m | 3409 | 0.028754 | FALSE | 1.722861 | FALSE | Endothelia Venous EC   |
| ACGATCA db/m2  | db/m | 589  | 0.007636 | FALSE | 2.76026  | FALSE | Neuron                 |
| ACGATGT db/m2  | db/m | 731  | 0.009277 | FALSE | 1.089514 | FALSE | Endothelia Capillary E |
| ACGCACG db/m2  | db/m | 215  | 0.019106 | FALSE | 70.17938 | TRUE  |                        |
| ACGCACG db/m2  | db/m | 4860 | 0.017758 | FALSE | 1.054781 | FALSE | Endothelia Capillary E |
| ACGGAAG db/m2  | db/m | 3493 | 0.13452  | TRUE  | 18.83369 | TRUE  |                        |
| ACGGAAG db/m2  | db/m | 553  | 0.060641 | FALSE | 1.887008 | FALSE | Photoreceptor          |
| ACGGGTC db/m2  | db/m | 914  | 0.022857 | FALSE | 38.32285 | TRUE  |                        |
| ACGGGTC db/m2  | db/m | 416  | 0.011561 | FALSE | 2.345768 | FALSE | Photoreceptor          |
| ACGGTCG db/m2  | db/m | 3327 | 0.078788 | FALSE | 1.984003 | FALSE | Photoreceptor          |
| ACGGTCG db/m2  | db/m | 2878 | 0.035586 | FALSE | 1.401269 | FALSE | Endothelia Aterial EC  |
| ACGGTTA db/m2  | db/m | 2224 | 0.095727 | FALSE | 1.894932 | FALSE | Photoreceptor          |
| ACGGTTAC db/m2 | db/m | 565  | 0.035586 | FALSE | 3.493135 | FALSE | Muller cell            |
| ACGGTTAC db/m2 | db/m | 2824 | 0.126437 | TRUE  | 16.18224 | TRUE  |                        |
| ACGGTTAT db/m2 | db/m | 8600 | 0.011561 | FALSE | 0.611474 | FALSE | Photoreceptor          |
| ACGTAAC db/m2  | db/m | 1093 | 0.025868 | FALSE | 0.559372 | FALSE | Photoreceptor          |
| ACGTAAC db/m2  | db/m | 4124 | 0.012052 | FALSE | 1.11376  | FALSE | Photoreceptor          |
| ACGTACA db/m2  | db/m | 934  | 0.018422 | FALSE | 4.542917 | FALSE | Muller cell            |
| ACGTACA db/m2  | db/m | 940  | 0.093319 | FALSE | 4.150921 | FALSE | Muller cell            |
| ACGTACAT db/m2 | db/m | 1259 | 0.017434 | FALSE | 1.20904  | FALSE | Endothelia Venous EC   |
| ACGTACAT db/m2 | db/m | 897  | 0.020171 | FALSE | 2.38058  | FALSE | Photoreceptor          |
| ACGTACAT db/m2 | db/m | 8847 | 0.013074 | FALSE | 0.702829 | FALSE | Photoreceptor          |
| ACGTAGT db/m2  | db/m | 1194 | 0.018422 | FALSE | 1.337296 | FALSE | Photoreceptor          |
| ACGTAGTC db/m2 | db/m | 846  | 0.011561 | FALSE | 55.10633 | TRUE  |                        |
| ACGTAGTC db/m2 | db/m | 408  | 0.103732 | TRUE  | 0.34749  | FALSE |                        |
| ACGTAGTC db/m2 | db/m | 388  | 0.008644 | FALSE | 1.583068 | FALSE | Muller cell            |

|                |      |      |          |       |          |       |                         |
|----------------|------|------|----------|-------|----------|-------|-------------------------|
| ACGTCCTA db/m2 | db/m | 1211 | 0.04192  | FALSE | 3.89394  | FALSE | Muller cell             |
| ACGTCCTA db/m2 | db/m | 2270 | 0.022857 | FALSE | 1.711828 | FALSE | Endothelia Capillary EC |
| ACGTCCTC db/m2 | db/m | 1312 | 0.091004 | FALSE | 0.584536 | FALSE | Photoreceptor           |
| ACGTCCTC db/m2 | db/m | 432  | 0.022059 | FALSE | 57.55156 | TRUE  |                         |
| ACGTTCCA db/m2 | db/m | 439  | 0.04192  | FALSE | 2.672812 | FALSE | Endothelia Capillary EC |
| ACGTTCCC db/m2 | db/m | 1779 | 0.037564 | FALSE | 2.131571 | FALSE | Endothelia Capillary EC |
| ACGTTCCC db/m2 | db/m | 4942 | 0.060641 | FALSE | 1.575387 | FALSE | Photoreceptor           |
| ACGTTCCC db/m2 | db/m | 3538 | 0.030859 | FALSE | 1.328329 | FALSE | Endothelia Capillary EC |
| ACTACGA db/m2  | db/m | 527  | 0.021286 | FALSE | 1.533325 | FALSE | Photoreceptor           |
| ACTACGAT db/m2 | db/m | 1269 | 0.046906 | FALSE | 3.266086 | FALSE | Endothelia Capillary EC |
| ACTATCTG db/m2 | db/m | 7148 | 0.058205 | FALSE | 0.916244 | FALSE | Endothelia Capillary EC |
| ACTATGG db/m2  | db/m | 550  | 0.033726 | FALSE | 0.870686 | FALSE | Photoreceptor           |
| ACTATTCA db/m2 | db/m | 414  | 0.068864 | FALSE | 2.588019 | FALSE | Muller cell             |
| ACTATTCC db/m2 | db/m | 353  | 0.024534 | FALSE | 57.15706 | TRUE  |                         |
| ACTATTCC db/m2 | db/m | 3369 | 0.009712 | FALSE | 1.404238 | FALSE | Photoreceptor           |
| ACTCCCAC db/m2 | db/m | 5752 | 0.042704 | FALSE | 1.125277 | FALSE | Endothelia Capillary EC |
| ACTCCCAC db/m2 | db/m | 2314 | 0.011805 | FALSE | 1.343582 | FALSE | Endothelia Capillary EC |
| ACTCCCAC db/m2 | db/m | 1431 | 0.076994 | FALSE | 2.141634 | FALSE | Photoreceptor           |
| ACTCCCAC db/m2 | db/m | 455  | 0.025416 | FALSE | 1.964844 | FALSE | Photoreceptor           |
| ACTCCCAG db/m2 | db/m | 5706 | 0.030859 | FALSE | 1.108898 | FALSE | Endothelia Venous EC    |
| ACTCCCAG db/m2 | db/m | 733  | 0.026796 | FALSE | 47.61437 | TRUE  |                         |
| ACTCCCAT db/m2 | db/m | 8406 | 0.018422 | FALSE | 0.291678 | FALSE | Photoreceptor           |
| ACTCCCAT db/m2 | db/m | 6569 | 0.065957 | FALSE | 1.072381 | FALSE | Endothelia Venous EC    |
| ACTCTCGC db/m2 | db/m | 582  | 0.034954 | FALSE | 3.508495 | FALSE | Muller cell             |
| ACTCTCGT db/m2 | db/m | 918  | 0.065957 | FALSE | 3.250025 | FALSE | Muller cell             |
| ACTCTCGT db/m2 | db/m | 1800 | 0.024971 | FALSE | 1.098267 | FALSE | Endothelia Capillary EC |
| ACTGATG db/m2  | db/m | 635  | 0.011081 | FALSE | 0.480363 | FALSE | Photoreceptor           |
| ACTGCAA db/m2  | db/m | 7715 | 0.028251 | FALSE | 0.873172 | FALSE | Photoreceptor           |
| ACTGCAAC db/m2 | db/m | 1681 | 0.04192  | FALSE | 2.070898 | FALSE | Photoreceptor           |
| ACTGCAAT db/m2 | db/m | 839  | 0.060641 | FALSE | 4.718293 | FALSE | Muller cell             |
| ACTGTCCA db/m2 | db/m | 4234 | 0.082569 | FALSE | 1.581738 | FALSE | Endothelia Capillary EC |
| ACTGTCCT db/m2 | db/m | 405  | 0.014429 | FALSE | 52.44328 | TRUE  |                         |
| ACTGTGAC db/m2 | db/m | 6842 | 0.039671 | FALSE | 1.03888  | FALSE | Photoreceptor           |
| ACTGTGAT db/m2 | db/m | 305  | 0.022455 | FALSE | 40.16807 | TRUE  |                         |
| ACTGTGAT db/m2 | db/m | 8542 | 0.024971 | FALSE | 0.895869 | FALSE | Photoreceptor           |
| ACTTAGG db/m2  | db/m | 460  | 0.029787 | FALSE | 43.08118 | TRUE  |                         |
| ACTTAGGC db/m2 | db/m | 4411 | 0.018761 | FALSE | 1.036353 | FALSE | Endothelia Venous EC    |
| ACTTAGGC db/m2 | db/m | 673  | 0.016488 | FALSE | 0.317355 | FALSE | Photoreceptor           |
| ACTTAGGC db/m2 | db/m | 583  | 0.067388 | FALSE | 1.200768 | FALSE | Photoreceptor           |
| ACTTATCA db/m2 | db/m | 463  | 0.252153 | TRUE  | 13.9785  | TRUE  |                         |
| ACTTATCA db/m2 | db/m | 408  | 0.030859 | FALSE | 43.222   | TRUE  |                         |
| ACTTATCA db/m2 | db/m | 4014 | 0.084562 | FALSE | 1.256205 | FALSE | Photoreceptor           |
| ACTTATCA db/m2 | db/m | 6189 | 0.039671 | FALSE | 1.079058 | FALSE | Endothelia Venous EC    |
| ACTTATCC db/m2 | db/m | 542  | 0.080645 | FALSE | 4.6079   | FALSE | Muller cell             |
| ACTTCCGC db/m2 | db/m | 6827 | 0.052669 | FALSE | 1.135844 | FALSE | Photoreceptor           |
| ACTTCCGC db/m2 | db/m | 5861 | 0.015581 | FALSE | 0.532268 | FALSE | Photoreceptor           |
| ACTTCCGC db/m2 | db/m | 3913 | 0.078788 | FALSE | 5.409317 | TRUE  |                         |

|                |      |      |          |       |          |       |                        |
|----------------|------|------|----------|-------|----------|-------|------------------------|
| ACTTCGCA db/m2 | db/m | 822  | 0.022059 | FALSE | 1.303172 | FALSE | Photoreceptor          |
| ACTTCGCA db/m2 | db/m | 787  | 0.049679 | FALSE | 1.688926 | FALSE | Neuron                 |
| ACTTCGCC db/m2 | db/m | 2891 | 0.095727 | FALSE | 1.917492 | FALSE | Muller cell            |
| ACTTCGCC db/m2 | db/m | 4531 | 0.023266 | FALSE | 1.220207 | FALSE | Neuron                 |
| ACTTCGCC db/m2 | db/m | 1916 | 0.023266 | FALSE | 4.805155 | FALSE | Muller cell            |
| ACTTCGCT db/m2 | db/m | 2034 | 0.029266 | FALSE | 0.729988 | FALSE | Photoreceptor          |
| ACTTTCAC db/m2 | db/m | 530  | 0.021669 | FALSE | 1.547309 | FALSE | Photoreceptor          |
| ACTTTGTC db/m2 | db/m | 7937 | 0.028754 | FALSE | 0.78757  | FALSE | Photoreceptor          |
| ACTTTGTG db/m2 | db/m | 3575 | 0.049679 | FALSE | 0.950446 | FALSE | Photoreceptor          |
| ACTTTGTT db/m2 | db/m | 442  | 0.027273 | FALSE | 3.563354 | FALSE | Muller cell            |
| AGAAATG db/m2  | db/m | 616  | 0.057037 | FALSE | 2.857992 | FALSE | Photoreceptor          |
| AGAAATG db/m2  | db/m | 4761 | 0.045165 | FALSE | 1.268537 | FALSE | Endothelia Capillary E |
| AGAACAA db/m2  | db/m | 656  | 0.038251 | FALSE | 35.81781 | TRUE  |                        |
| AGAACAA db/m2  | db/m | 1779 | 0.106408 | TRUE  | 2.274204 | FALSE |                        |
| AGAACAA db/m2  | db/m | 837  | 0.145859 | TRUE  | 1.430976 | FALSE |                        |
| AGAACAA db/m2  | db/m | 5549 | 0.048732 | FALSE | 1.19935  | FALSE | Photoreceptor          |
| AGAACCT db/m2  | db/m | 1867 | 0.046906 | FALSE | 1.138821 | FALSE | Photoreceptor          |
| AGAAGCG db/m2  | db/m | 510  | 0.042704 | FALSE | 4.454299 | FALSE | Muller cell            |
| AGAAGCG db/m2  | db/m | 5574 | 0.042704 | FALSE | 1.282565 | FALSE | Neuron                 |
| AGAAGTA db/m2  | db/m | 6401 | 0.153234 | TRUE  | 3.602134 | FALSE |                        |
| AGAAGTA db/m2  | db/m | 5242 | 0.019106 | FALSE | 0.967128 | FALSE | Photoreceptor          |
| AGAAGTA db/m2  | db/m | 774  | 0.036891 | FALSE | 1.97804  | FALSE | Photoreceptor          |
| AGAAGTA db/m2  | db/m | 1288 | 0.014151 | FALSE | 1.825527 | FALSE | Endothelia Capillary E |
| AGACAAA db/m2  | db/m | 1244 | 0.027758 | FALSE | 1.690333 | FALSE | Photoreceptor          |
| AGACAAA db/m2  | db/m | 542  | 0.014997 | FALSE | 0.391816 | FALSE | Photoreceptor          |
| AGACACT db/m2  | db/m | 680  | 0.023266 | FALSE | 2.623034 | FALSE | Endothelia Capillary E |
| AGACACT db/m2  | db/m | 1470 | 0.064568 | FALSE | 3.739581 | FALSE | Muller cell            |
| AGACACT db/m2  | db/m | 1177 | 0.052669 | FALSE | 1.83724  | FALSE | Photoreceptor          |
| AGACACT db/m2  | db/m | 2069 | 0.022059 | FALSE | 1.793956 | FALSE | Endothelia Capillary E |
| AGACAGG db/m2  | db/m | 4414 | 0.021669 | FALSE | 1.170706 | FALSE | Endothelia Venous EC   |
| AGACAGG db/m2  | db/m | 1335 | 0.003959 | FALSE | 1.607558 | FALSE | Pericyte               |
| AGACAGG db/m2  | db/m | 1597 | 0.028754 | FALSE | 2.290413 | FALSE | Photoreceptor          |
| AGACCAT db/m2  | db/m | 355  | 0.022455 | FALSE | 2.647323 | FALSE | Muller cell            |
| AGACCAT db/m2  | db/m | 1399 | 0.095727 | FALSE | 10.55296 | TRUE  |                        |
| AGACCAT db/m2  | db/m | 1301 | 0.045165 | FALSE | 2.171006 | FALSE | Photoreceptor          |
| AGACCCG db/m2  | db/m | 835  | 0.047807 | FALSE | 4.652985 | FALSE | Muller cell            |
| AGACCCG db/m2  | db/m | 721  | 0.042704 | FALSE | 1.873014 | FALSE | Photoreceptor          |
| AGACCCG db/m2  | db/m | 5155 | 0.017434 | FALSE | 1.012915 | FALSE | Endothelia Venous EC   |
| AGACCCG db/m2  | db/m | 4369 | 0.022455 | FALSE | 1.275274 | FALSE | Photoreceptor          |
| AGACCCG db/m2  | db/m | 6213 | 0.159016 | TRUE  | 4.404692 | FALSE |                        |
| AGACTCA db/m2  | db/m | 548  | 0.013605 | FALSE | 57.61658 | TRUE  |                        |
| AGAGAAT db/m2  | db/m | 1374 | 0.015581 | FALSE | 2.37582  | FALSE | Photoreceptor          |
| AGAGAAT db/m2  | db/m | 815  | 0.042704 | FALSE | 34.0185  | TRUE  |                        |
| AGAGAGC db/m2  | db/m | 3980 | 0.010157 | FALSE | 1.022227 | FALSE | Endothelia Venous EC   |
| AGAGAGC db/m2  | db/m | 1503 | 0.020536 | FALSE | 0.604591 | FALSE | Pericyte               |
| AGAGAGC db/m2  | db/m | 3720 | 0.015879 | FALSE | 1.439119 | FALSE | Endothelia Capillary E |
| AGAGAGC db/m2  | db/m | 2530 | 0.036891 | FALSE | 2.160484 | FALSE | Muller cell            |



|                |      |      |          |       |          |       |                        |
|----------------|------|------|----------|-------|----------|-------|------------------------|
| AGAGAGC` db/m2 | db/m | 688  | 0.054795 | FALSE | 3.958362 | FALSE | Muller cell            |
| AGAGCAG, db/m2 | db/m | 1123 | 0.043505 | FALSE | 0.40435  | FALSE | Photoreceptor          |
| AGAGCAG, db/m2 | db/m | 1749 | 0.006137 | FALSE | 1.454309 | FALSE | Pericyte               |
| AGAGCAG` db/m2 | db/m | 4345 | 0.073582 | FALSE | 1.327159 | FALSE | Endothelia Venous EC   |
| AGAGCCC, db/m2 | db/m | 1281 | 0.031973 | FALSE | 1.603752 | FALSE | Photoreceptor          |
| AGAGCCC( db/m2 | db/m | 1935 | 0.022455 | FALSE | 1.191908 | FALSE | Endothelia Capillary E |
| AGATAGA( db/m2 | db/m | 522  | 0.025416 | FALSE | 1.580701 | FALSE | Photoreceptor          |
| AGATAGA( db/m2 | db/m | 1778 | 0.133788 | TRUE  | 4.072117 | FALSE |                        |
| AGATAGA` db/m2 | db/m | 496  | 0.017114 | FALSE | 63.23378 | TRUE  |                        |
| AGATCCA, db/m2 | db/m | 1027 | 0.014151 | FALSE | 3.264457 | FALSE | Muller cell            |
| AGATCCA( db/m2 | db/m | 8422 | 0.016181 | FALSE | 0.42633  | FALSE | Photoreceptor          |
| AGATCCAT db/m2 | db/m | 2417 | 0.038251 | FALSE | 1.757584 | FALSE | Neuron                 |
| AGATCGT, db/m2 | db/m | 517  | 0.030859 | FALSE | 35.78544 | TRUE  |                        |
| AGATCGT( db/m2 | db/m | 914  | 0.013338 | FALSE | 0.878519 | FALSE | Photoreceptor          |
| AGATCGT( db/m2 | db/m | 670  | 0.076994 | FALSE | 4.015329 | FALSE | Muller cell            |
| AGATCGT( db/m2 | db/m | 4402 | 0.040404 | FALSE | 1.333787 | FALSE | Photoreceptor          |
| AGATGAA( db/m2 | db/m | 1106 | 0.016488 | FALSE | 0.188089 | FALSE | Pericyte               |
| AGATGAA( db/m2 | db/m | 649  | 0.028754 | FALSE | 4.863956 | FALSE | Muller cell            |
| AGATGAA` db/m2 | db/m | 4697 | 0.024971 | FALSE | 1.183986 | FALSE | Endothelia Venous EC   |
| AGATGCT, db/m2 | db/m | 216  | 0.044326 | FALSE | 59.66387 | TRUE  |                        |
| AGATGCT( db/m2 | db/m | 399  | 0.041154 | FALSE | 3.443637 | FALSE | Muller cell            |
| AGATGCT, db/m2 | db/m | 3613 | 0.082569 | FALSE | 15.94957 | TRUE  |                        |
| AGCATCA, db/m2 | db/m | 451  | 0.034334 | FALSE | 3.615915 | FALSE | Muller cell            |
| AGCATCA, db/m2 | db/m | 4479 | 0.049679 | FALSE | 1.24221  | FALSE | Photoreceptor          |
| AGCATCA( db/m2 | db/m | 593  | 0.078788 | FALSE | 4.561682 | FALSE | Muller cell            |
| AGCATCA( db/m2 | db/m | 6366 | 0.007249 | FALSE | 0.945459 | FALSE | Neuron                 |
| AGCATCAT db/m2 | db/m | 626  | 0.043505 | FALSE | 1.682371 | FALSE | Muller cell            |
| AGCATCAT db/m2 | db/m | 612  | 0.011561 | FALSE | 47.05562 | TRUE  |                        |
| AGCCAAT( db/m2 | db/m | 1496 | 0.039671 | FALSE | 2.615376 | FALSE | Neuron                 |
| AGCCAAT( db/m2 | db/m | 868  | 0.039671 | FALSE | 43.59198 | TRUE  |                        |
| AGCCAATT db/m2 | db/m | 3953 | 0.023682 | FALSE | 1.314457 | FALSE | Endothelia Capillary E |
| AGCCAATT db/m2 | db/m | 1021 | 0.017758 | FALSE | 0.552202 | FALSE | Photoreceptor          |
| AGCCAATT db/m2 | db/m | 522  | 0.019455 | FALSE | 43.92885 | TRUE  |                        |
| AGCCACG, db/m2 | db/m | 432  | 0.019106 | FALSE | 3.023931 | FALSE | Muller cell            |
| AGCCACG( db/m2 | db/m | 3008 | 0.008852 | FALSE | 1.255343 | FALSE | Photoreceptor          |
| AGCCACG( db/m2 | db/m | 398  | 0.13452  | TRUE  | 27.36078 | TRUE  |                        |
| AGCCACG, db/m2 | db/m | 6307 | 0.012814 | FALSE | 1.3064   | FALSE | Photoreceptor          |
| AGCCAGC( db/m2 | db/m | 414  | 0.009712 | FALSE | 51.03627 | TRUE  |                        |
| AGCCAGC( db/m2 | db/m | 2149 | 0.014997 | FALSE | 0.432545 | FALSE | Photoreceptor          |
| AGCCAGC( db/m2 | db/m | 3122 | 0.010846 | FALSE | 1.411962 | FALSE | Endothelia Aterial EC  |
| AGCGATT( db/m2 | db/m | 370  | 0.08663  | FALSE | 4.159858 | FALSE | Muller cell            |
| AGCGATT( db/m2 | db/m | 342  | 0.019106 | FALSE | 61.45675 | TRUE  |                        |
| AGCGATT( db/m2 | db/m | 7475 | 0.017758 | FALSE | 0.861779 | FALSE | Photoreceptor          |
| AGCGCCA, db/m2 | db/m | 2896 | 0.003196 | FALSE | 0.827659 | FALSE | Neuron                 |
| AGCGCTG( db/m2 | db/m | 2230 | 0.05065  | FALSE | 10.60639 | TRUE  |                        |
| AGCGCTG( db/m2 | db/m | 373  | 0.058205 | FALSE | 3.671574 | FALSE | Muller cell            |
| AGCGCTG( db/m2 | db/m | 1663 | 0.018761 | FALSE | 1.054937 | FALSE | Photoreceptor          |

|                |      |      |          |       |          |       |                        |
|----------------|------|------|----------|-------|----------|-------|------------------------|
| AGCGTATT db/m2 | db/m | 2506 | 0.021669 | FALSE | 0.315059 | FALSE | Photoreceptor          |
| AGCGTCG db/m2  | db/m | 890  | 0.037564 | FALSE | 0.884549 | FALSE | Photoreceptor          |
| AGCTACAC db/m2 | db/m | 709  | 0.017758 | FALSE | 47.88793 | TRUE  |                        |
| AGCTACAC db/m2 | db/m | 1268 | 0.020908 | FALSE | 1.989745 | FALSE | Endothelia Capillary E |
| AGCTACAC db/m2 | db/m | 269  | 0.011319 | FALSE | 64.54054 | TRUE  |                        |
| AGCTACAC db/m2 | db/m | 3595 | 0.016799 | FALSE | 1.348407 | FALSE | Endothelia Venous EC   |
| AGCTCAA db/m2  | db/m | 601  | 0.025868 | FALSE | 44.46627 | TRUE  |                        |
| AGCTTCCA db/m2 | db/m | 9720 | 0.012557 | FALSE | 0.547613 | FALSE | Photoreceptor          |
| AGCTTCCA db/m2 | db/m | 4296 | 0.051646 | FALSE | 1.921084 | FALSE | Muller cell            |
| AGGAAAT db/m2  | db/m | 2751 | 0.058205 | FALSE | 1.454599 | FALSE | Pericyte               |
| AGGAAAT db/m2  | db/m | 9586 | 0.022059 | FALSE | 0.626646 | FALSE | Photoreceptor          |
| AGGAAAT db/m2  | db/m | 209  | 0.042704 | FALSE | 30.22814 | TRUE  |                        |
| AGGAAAT db/m2  | db/m | 1281 | 0.008644 | FALSE | 1.395119 | FALSE | Endothelia Capillary E |
| AGGAATA db/m2  | db/m | 3726 | 0.008032 | FALSE | 0.92929  | FALSE | Photoreceptor          |
| AGGAATA db/m2  | db/m | 3172 | 0.019455 | FALSE | 1.173292 | FALSE | Endothelia Capillary E |
| AGGAATA db/m2  | db/m | 725  | 0.021669 | FALSE | 1.424141 | FALSE | Photoreceptor          |
| AGGAATA db/m2  | db/m | 717  | 0.130374 | TRUE  | 17.54386 | TRUE  |                        |
| AGGACGA db/m2  | db/m | 329  | 0.009063 | FALSE | 56.02988 | TRUE  |                        |
| AGGACGA db/m2  | db/m | 445  | 0.054795 | FALSE | 1.56219  | FALSE | Photoreceptor          |
| AGGACGA db/m2  | db/m | 3238 | 0.143501 | TRUE  | 11.12537 | TRUE  |                        |
| AGGACTTC db/m2 | db/m | 818  | 0.006499 | FALSE | 1.783574 | FALSE | Endothelia Capillary E |
| AGGACTTC db/m2 | db/m | 850  | 0.078788 | FALSE | 11.12853 | TRUE  |                        |
| AGGACTTC db/m2 | db/m | 692  | 0.029266 | FALSE | 2.797823 | FALSE | Photoreceptor          |
| AGGAGGT db/m2  | db/m | 3122 | 0.071958 | FALSE | 2.361293 | FALSE | Muller cell            |
| AGGAGGT db/m2  | db/m | 474  | 0.018088 | FALSE | 49.79396 | TRUE  |                        |
| AGGAGGT db/m2  | db/m | 2054 | 0.032546 | FALSE | 1.921074 | FALSE | Pericyte               |
| AGGAGGT db/m2  | db/m | 495  | 0.296296 | TRUE  | 28.90026 | TRUE  |                        |
| AGGATAA db/m2  | db/m | 1038 | 0.016181 | FALSE | 1.104891 | FALSE | Photoreceptor          |
| AGGATCT db/m2  | db/m | 1445 | 0.043505 | FALSE | 1.92301  | FALSE | Photoreceptor          |
| AGGATCT db/m2  | db/m | 529  | 0.035586 | FALSE | 37.73585 | TRUE  |                        |
| AGGATCT db/m2  | db/m | 1860 | 0.037564 | FALSE | 21.02928 | TRUE  |                        |
| AGGATCT db/m2  | db/m | 4734 | 0.04192  | FALSE | 1.182872 | FALSE | Endothelia Venous EC   |
| AGGATCT db/m2  | db/m | 1172 | 0.027758 | FALSE | 3.093132 | FALSE | Neuron                 |
| AGGATCT db/m2  | db/m | 5856 | 0.013876 | FALSE | 0.752072 | FALSE | Photoreceptor          |
| AGGCATT db/m2  | db/m | 472  | 0.027758 | FALSE | 2.135982 | FALSE | Neuron                 |
| AGGCATT db/m2  | db/m | 291  | 0.021286 | FALSE | 59.84427 | TRUE  |                        |
| AGGCATT db/m2  | db/m | 5479 | 0.036891 | FALSE | 1.063754 | FALSE | Photoreceptor          |
| AGGCATT db/m2  | db/m | 1232 | 0.036232 | FALSE | 2.109841 | FALSE | Photoreceptor          |
| AGGCCAC db/m2  | db/m | 2106 | 0.019106 | FALSE | 1.187998 | FALSE | Photoreceptor          |
| AGGCCAC db/m2  | db/m | 6706 | 0.021286 | FALSE | 1.032145 | FALSE | Photoreceptor          |
| AGGCCAC db/m2  | db/m | 2025 | 0.032546 | FALSE | 2.691632 | FALSE | Muller cell            |
| AGGCCAC db/m2  | db/m | 412  | 0.011319 | FALSE | 2.099572 | FALSE | Photoreceptor          |
| AGGCTGC db/m2  | db/m | 1201 | 0.038953 | FALSE | 1.527341 | FALSE | Photoreceptor          |
| AGGCTGC db/m2  | db/m | 1521 | 0.032546 | FALSE | 1.496094 | FALSE | Photoreceptor          |
| AGGCTGC db/m2  | db/m | 761  | 0.091004 | FALSE | 4.164966 | FALSE | Muller cell            |
| AGGCTGC db/m2  | db/m | 642  | 0.049679 | FALSE | 4.750982 | FALSE | Muller cell            |
| AGGCTGC db/m2  | db/m | 368  | 0.084562 | FALSE | 3.759537 | FALSE | Microglia              |

|                |      |      |          |       |          |       |                        |
|----------------|------|------|----------|-------|----------|-------|------------------------|
| AGGGAGT db/m2  | db/m | 3894 | 0.031973 | FALSE | 0.858748 | FALSE | Photoreceptor          |
| AGGGAGT db/m2  | db/m | 2472 | 0.005095 | FALSE | 1.784221 | FALSE | Neuron                 |
| AGGGAGT db/m2  | db/m | 2778 | 0.025868 | FALSE | 1.456664 | FALSE | Endothelia Aterial EC  |
| AGGGCCT db/m2  | db/m | 4272 | 0.054795 | FALSE | 1.094834 | FALSE | Photoreceptor          |
| AGGGCCT db/m2  | db/m | 1366 | 0.038953 | FALSE | 4.735456 | FALSE | Muller cell            |
| AGGGCCT db/m2  | db/m | 798  | 0.046906 | FALSE | 3.930438 | FALSE | Muller cell            |
| AGGGCTC db/m2  | db/m | 1300 | 0.016799 | FALSE | 0.983212 | FALSE | Photoreceptor          |
| AGGGCTC db/m2  | db/m | 426  | 0.038953 | FALSE | 33.61244 | TRUE  |                        |
| AGGGCTC db/m2  | db/m | 3714 | 0.035586 | FALSE | 1.218572 | FALSE | Photoreceptor          |
| AGGGTCC db/m2  | db/m | 1812 | 0.012303 | FALSE | 1.831366 | FALSE | Endothelia Capillary E |
| AGGGTCC db/m2  | db/m | 780  | 0.027273 | FALSE | 0.570342 | FALSE | Photoreceptor          |
| AGGGTGA db/m2  | db/m | 2824 | 0.034954 | FALSE | 0.871784 | FALSE | Photoreceptor          |
| AGGGTTT db/m2  | db/m | 2856 | 0.073582 | FALSE | 11.28191 | TRUE  |                        |
| AGGGTTT db/m2  | db/m | 1740 | 0.044326 | FALSE | 1.596122 | FALSE | Endothelia Venous EC   |
| AGGGTTT db/m2  | db/m | 1018 | 0.024971 | FALSE | 0.596875 | FALSE | Photoreceptor          |
| AGGGTTT db/m2  | db/m | 3428 | 0.022059 | FALSE | 1.265454 | FALSE | Endothelia Capillary E |
| AGGTAGG db/m2  | db/m | 350  | 0.010157 | FALSE | 55.64893 | TRUE  |                        |
| AGGTAGG db/m2  | db/m | 1004 | 0.04192  | FALSE | 12.06698 | TRUE  |                        |
| AGGTCAT db/m2  | db/m | 4953 | 0.031973 | FALSE | 1.385972 | FALSE | Photoreceptor          |
| AGGTCTA db/m2  | db/m | 750  | 0.031973 | FALSE | 4.707067 | FALSE | Muller cell            |
| AGGTCTA db/m2  | db/m | 2231 | 0.080645 | FALSE | 2.59392  | FALSE | Muller cell            |
| AGGTCTA db/m2  | db/m | 2511 | 0.022455 | FALSE | 1.371595 | FALSE | Photoreceptor          |
| AGGTCTA db/m2  | db/m | 1835 | 0.058205 | FALSE | 2.245155 | FALSE | Photoreceptor          |
| AGGTCTA db/m2  | db/m | 4542 | 0.020908 | FALSE | 1.616894 | FALSE | Neuron                 |
| AGGTCTA db/m2  | db/m | 814  | 0.123251 | TRUE  | 2.839397 | FALSE |                        |
| AGGTCTA db/m2  | db/m | 5795 | 0.017758 | FALSE | 0.9062   | FALSE | Photoreceptor          |
| AGGTGTT db/m2  | db/m | 9380 | 0.020171 | FALSE | 0.602803 | FALSE | Photoreceptor          |
| AGGTTAC db/m2  | db/m | 379  | 0.034954 | FALSE | 2.916079 | FALSE | Photoreceptor          |
| AGGTTAC db/m2  | db/m | 1033 | 0.017114 | FALSE | 0.887035 | FALSE | Photoreceptor          |
| AGGTTGT db/m2  | db/m | 538  | 0.036232 | FALSE | 4.247721 | FALSE | Pericyte               |
| AGTAACC db/m2  | db/m | 4069 | 0.029787 | FALSE | 0.933761 | FALSE | Photoreceptor          |
| AGTAACC db/m2  | db/m | 160  | 0.011805 | FALSE | 74.7159  | TRUE  |                        |
| AGTAACCC db/m2 | db/m | 5535 | 0.019455 | FALSE | 1.339502 | FALSE | Photoreceptor          |
| AGTAACCC db/m2 | db/m | 6290 | 0.013338 | FALSE | 0.796406 | FALSE | Photoreceptor          |
| AGTAACCC db/m2 | db/m | 7416 | 0.023682 | FALSE | 1.096969 | FALSE | Photoreceptor          |
| AGTAACCC db/m2 | db/m | 1273 | 0.054795 | FALSE | 1.485265 | FALSE | Photoreceptor          |
| AGTAACCT db/m2 | db/m | 447  | 0.022059 | FALSE | 4.062985 | FALSE | Neuron                 |
| AGTAACCT db/m2 | db/m | 508  | 0.014429 | FALSE | 0        | FALSE | Photoreceptor          |
| AGTAACCT db/m2 | db/m | 4088 | 0.026796 | FALSE | 0.930997 | FALSE | Photoreceptor          |
| AGTACCA db/m2  | db/m | 6980 | 0.030859 | FALSE | 1.221414 | FALSE | Photoreceptor          |
| AGTACCA db/m2  | db/m | 892  | 0.025868 | FALSE | 2.88314  | FALSE | Endothelia Aterial EC  |
| AGTACTG db/m2  | db/m | 4548 | 0.024971 | FALSE | 1.291555 | FALSE | Endothelia Venous EC   |
| AGTACTG db/m2  | db/m | 3005 | 0.028251 | FALSE | 1.556761 | FALSE | Endothelia Capillary E |
| AGTACTG db/m2  | db/m | 3825 | 0.095727 | FALSE | 11.96205 | TRUE  |                        |
| AGTAGCT db/m2  | db/m | 6711 | 0.070386 | FALSE | 1.334673 | FALSE | Neuron                 |
| AGTAGCT db/m2  | db/m | 3083 | 0.057037 | FALSE | 1.942101 | FALSE | Neuron                 |
| AGTAGCT db/m2  | db/m | 944  | 0.357022 | TRUE  | 2.992021 | FALSE |                        |

|                |      |      |          |       |          |       |                         |
|----------------|------|------|----------|-------|----------|-------|-------------------------|
| AGTAGCTT db/m2 | db/m | 405  | 0.03313  | FALSE | 1.504776 | FALSE | Photoreceptor           |
| AGTAGCTT db/m2 | db/m | 4385 | 0.038953 | FALSE | 1.390925 | FALSE | Endothelia Venous EC    |
| AGTAGTCC db/m2 | db/m | 3259 | 0.010384 | FALSE | 1.499752 | FALSE | Photoreceptor           |
| AGTAGTCC db/m2 | db/m | 566  | 0.032546 | FALSE | 46.71336 | TRUE  |                         |
| AGTCAAC db/m2  | db/m | 939  | 0.060641 | FALSE | 4.2879   | FALSE | Muller cell             |
| AGTCAACC db/m2 | db/m | 6830 | 0.021286 | FALSE | 0.822384 | FALSE | Photoreceptor           |
| AGTCACA db/m2  | db/m | 394  | 0.008438 | FALSE | 62.77533 | TRUE  |                         |
| AGTCACAC db/m2 | db/m | 3396 | 0.012303 | FALSE | 1.986413 | FALSE | Neuron                  |
| AGTCATGC db/m2 | db/m | 505  | 0.032546 | FALSE | 3.742857 | FALSE | Endothelia Capillary EC |
| AGTCTCCA db/m2 | db/m | 839  | 0.017434 | FALSE | 61.71535 | TRUE  |                         |
| AGTCTCCC db/m2 | db/m | 580  | 0.024105 | FALSE | 40.0738  | TRUE  |                         |
| AGTCTCCC db/m2 | db/m | 2993 | 0.035586 | FALSE | 1.562802 | FALSE | Neuron                  |
| AGTCTCCG db/m2 | db/m | 471  | 0.017434 | FALSE | 3.433002 | FALSE | Photoreceptor           |
| AGTCTCCG db/m2 | db/m | 2473 | 0.022455 | FALSE | 0.735059 | FALSE | Photoreceptor           |
| AGTCTCCT db/m2 | db/m | 608  | 0.042704 | FALSE | 4.124064 | FALSE | Muller cell             |
| AGTGACT db/m2  | db/m | 362  | 0.013876 | FALSE | 51.00529 | TRUE  |                         |
| AGTGACTC db/m2 | db/m | 1956 | 0.014711 | FALSE | 1.762491 | FALSE | Photoreceptor           |
| AGTGATCC db/m2 | db/m | 411  | 0.04192  | FALSE | 15.68323 | TRUE  |                         |
| AGTGATCC db/m2 | db/m | 8640 | 0.334395 | TRUE  | 1.442516 | FALSE |                         |
| AGTGATCT db/m2 | db/m | 7224 | 0.021286 | FALSE | 1.132277 | FALSE | Photoreceptor           |
| AGTGCCG db/m2  | db/m | 1966 | 0.014429 | FALSE | 1.399852 | FALSE | Endothelia Capillary EC |
| AGTGCCG db/m2  | db/m | 745  | 0.015287 | FALSE | 3.395199 | FALSE | Photoreceptor           |
| AGTGCCG db/m2  | db/m | 208  | 0.014997 | FALSE | 72.45902 | TRUE  |                         |
| AGTGCCG db/m2  | db/m | 2707 | 0.036891 | FALSE | 1.8738   | FALSE | Neuron                  |
| AGTGCCG db/m2  | db/m | 877  | 0.007249 | FALSE | 1.423189 | FALSE | Photoreceptor           |
| AGTGCCG db/m2  | db/m | 362  | 0.015581 | FALSE | 0.252092 | FALSE | Photoreceptor           |
| AGTGTTGC db/m2 | db/m | 4811 | 0.026328 | FALSE | 1.359923 | FALSE | Endothelia Venous EC    |
| AGTGTTGC db/m2 | db/m | 4739 | 0.017114 | FALSE | 1.167935 | FALSE | Photoreceptor           |
| AGTGTTG db/m2  | db/m | 342  | 0.024105 | FALSE | 68.13596 | TRUE  |                         |
| AGTTAGC db/m2  | db/m | 372  | 0.023682 | FALSE | 4.048376 | FALSE | Endothelia Capillary EC |
| AGTTAGC db/m2  | db/m | 3704 | 0.011805 | FALSE | 0.405578 | FALSE | Photoreceptor           |
| AGTTAGCC db/m2 | db/m | 1399 | 0.049679 | FALSE | 2.187747 | FALSE | Photoreceptor           |
| AGTTAGCC db/m2 | db/m | 543  | 0.029787 | FALSE | 54.23412 | TRUE  |                         |
| AGTTAGCC db/m2 | db/m | 1132 | 0.065957 | FALSE | 20.15632 | TRUE  |                         |
| AGTTAGCC db/m2 | db/m | 2161 | 0.015287 | FALSE | 1.571472 | FALSE | Endothelia Aterial EC   |
| AGTTAGCC db/m2 | db/m | 2643 | 0.023266 | FALSE | 0.902131 | FALSE | Photoreceptor           |
| AGTTAGCT db/m2 | db/m | 464  | 0.021286 | FALSE | 2.135179 | FALSE | Photoreceptor           |
| AGTTCCCA db/m2 | db/m | 2017 | 0.013876 | FALSE | 1.327357 | FALSE | Endothelia Capillary EC |
| AGTTCCCC db/m2 | db/m | 943  | 0.017114 | FALSE | 46.58612 | TRUE  |                         |
| AGTTCCCC db/m2 | db/m | 2446 | 0.018761 | FALSE | 1.901629 | FALSE | Endothelia Capillary EC |
| AGTTCGA db/m2  | db/m | 334  | 0.063221 | FALSE | 54.48449 | TRUE  |                         |
| ATACCGAC db/m2 | db/m | 2536 | 0.019106 | FALSE | 1.60633  | FALSE | Photoreceptor           |
| ATACCGAC db/m2 | db/m | 2049 | 0.022059 | FALSE | 1.270652 | FALSE | Endothelia Capillary EC |
| ATACCGAT db/m2 | db/m | 404  | 0.018088 | FALSE | 4.03541  | FALSE | Muller cell             |
| ATACCTTG db/m2 | db/m | 976  | 0.068864 | FALSE | 4.228987 | FALSE | Muller cell             |
| ATACCTTT db/m2 | db/m | 2077 | 0.055901 | FALSE | 2.152965 | FALSE | Photoreceptor           |
| ATACCTTT db/m2 | db/m | 532  | 0.013338 | FALSE | 3.264136 | FALSE | Endothelia Capillary EC |

|                |      |      |          |       |          |       |                         |
|----------------|------|------|----------|-------|----------|-------|-------------------------|
| ATACTTCC db/m2 | db/m | 1555 | 0.015879 | FALSE | 1.368793 | FALSE | Photoreceptor           |
| ATAGACC db/m2  | db/m | 8590 | 0.014997 | FALSE | 0.842501 | FALSE | Photoreceptor           |
| ATAGACC db/m2  | db/m | 2390 | 0.037564 | FALSE | 1.964942 | FALSE | Photoreceptor           |
| ATAGACCT db/m2 | db/m | 1127 | 0.031973 | FALSE | 0.907991 | FALSE | Photoreceptor           |
| ATAGACCT db/m2 | db/m | 7724 | 0.022059 | FALSE | 1.120837 | FALSE | Photoreceptor           |
| ATAGACCT db/m2 | db/m | 3367 | 0.046025 | FALSE | 1.35626  | FALSE | Photoreceptor           |
| ATAGAGA db/m2  | db/m | 454  | 0.064568 | FALSE | 61.90476 | TRUE  |                         |
| ATAGAGA db/m2  | db/m | 3996 | 0.012052 | FALSE | 1.342169 | FALSE | Endothelia Venous EC    |
| ATAGAGA db/m2  | db/m | 378  | 0.08663  | FALSE | 5.996131 | TRUE  |                         |
| ATAGAGA db/m2  | db/m | 2139 | 0.022455 | FALSE | 1.445388 | FALSE | Endothelia Capillary EC |
| ATAGGCT db/m2  | db/m | 6290 | 0.037564 | FALSE | 0.835468 | FALSE | Photoreceptor           |
| ATAGGCT db/m2  | db/m | 438  | 0.088776 | FALSE | 2.680411 | FALSE | Photoreceptor           |
| ATAGGCT db/m2  | db/m | 4272 | 0.049679 | FALSE | 0.923428 | FALSE | Photoreceptor           |
| ATAGGCT db/m2  | db/m | 1571 | 0.047807 | FALSE | 1.635262 | FALSE | Pericyte                |
| ATAGGCT db/m2  | db/m | 4343 | 0.003345 | FALSE | 0.921645 | FALSE | Neuron                  |
| ATATCCTC db/m2 | db/m | 1701 | 0.042704 | FALSE | 2.182083 | FALSE | Photoreceptor           |
| ATATCCTG db/m2 | db/m | 1758 | 0.053718 | FALSE | 0.84864  | FALSE | Photoreceptor           |
| ATATCCTG db/m2 | db/m | 278  | 0.017758 | FALSE | 55.55556 | TRUE  |                         |
| ATCACAG db/m2  | db/m | 1099 | 0.007441 | FALSE | 2.191447 | FALSE | Muller cell             |
| ATCACAG db/m2  | db/m | 7477 | 0.023682 | FALSE | 0.954279 | FALSE | Endothelia Venous EC    |
| ATCACAG db/m2  | db/m | 1764 | 0.036232 | FALSE | 1.238542 | FALSE | Endothelia Capillary EC |
| ATCACAG db/m2  | db/m | 2082 | 0.042704 | FALSE | 2.219513 | FALSE | Photoreceptor           |
| ATCACAG db/m2  | db/m | 656  | 0.040404 | FALSE | 1.046058 | FALSE | Photoreceptor           |
| ATCACAG db/m2  | db/m | 923  | 0.028251 | FALSE | 1.227856 | FALSE | Endothelia Venous EC    |
| ATCACAG db/m2  | db/m | 6647 | 0.040404 | FALSE | 1.027753 | FALSE | Photoreceptor           |
| ATCACAG db/m2  | db/m | 676  | 0.021669 | FALSE | 1.466605 | FALSE | Photoreceptor           |
| ATCACGA db/m2  | db/m | 925  | 0.070386 | FALSE | 3.096407 | FALSE | Muller cell             |
| ATCACGA db/m2  | db/m | 3147 | 0.042704 | FALSE | 1.459055 | FALSE | Photoreceptor           |
| ATCACGA db/m2  | db/m | 4425 | 0.023266 | FALSE | 1.342476 | FALSE | Endothelia Venous EC    |
| ATCACGA db/m2  | db/m | 674  | 0.082569 | FALSE | 4.203791 | FALSE | Muller cell             |
| ATCACTTA db/m2 | db/m | 767  | 0.024971 | FALSE | 2.926646 | FALSE | Photoreceptor           |
| ATCACTTC db/m2 | db/m | 424  | 0.055901 | FALSE | 2.180767 | FALSE | Photoreceptor           |
| ATCACTTT db/m2 | db/m | 1233 | 0.048732 | FALSE | 2.667013 | FALSE | Photoreceptor           |
| ATCAGGT db/m2  | db/m | 2668 | 0.013605 | FALSE | 1.434568 | FALSE | Endothelia Capillary EC |
| ATCAGGT db/m2  | db/m | 1180 | 0.08663  | FALSE | 1.283468 | FALSE | Photoreceptor           |
| ATCAGGT db/m2  | db/m | 442  | 0.01981  | FALSE | 1.833651 | FALSE | Muller cell             |
| ATCATTCA db/m2 | db/m | 930  | 0.022455 | FALSE | 2.254401 | FALSE | Muller cell             |
| ATCATTCA db/m2 | db/m | 1938 | 0.010157 | FALSE | 1.404106 | FALSE | Endothelia Capillary EC |
| ATCATTC db/m2  | db/m | 5745 | 0.038251 | FALSE | 0.944868 | FALSE | Photoreceptor           |
| ATCATTCG db/m2 | db/m | 1165 | 0.088776 | FALSE | 20.3933  | TRUE  |                         |
| ATCCACCA db/m2 | db/m | 567  | 0.014151 | FALSE | 43.64433 | TRUE  |                         |
| ATCCACCA db/m2 | db/m | 3190 | 0.016799 | FALSE | 1.297678 | FALSE | Photoreceptor           |
| ATCCACCG db/m2 | db/m | 2963 | 0.009277 | FALSE | 1.464767 | FALSE | Photoreceptor           |
| ATCCATTC db/m2 | db/m | 1581 | 0.016181 | FALSE | 1.0825   | FALSE | Endothelia Capillary EC |
| ATCCATTG db/m2 | db/m | 985  | 0.038251 | FALSE | 1.52049  | FALSE | Photoreceptor           |
| ATCCATTT db/m2 | db/m | 1470 | 0.038251 | FALSE | 0.813414 | FALSE | Photoreceptor           |
| ATCCATTT db/m2 | db/m | 600  | 0.017434 | FALSE | 1.271098 | FALSE | Pericyte                |

|                |      |      |          |       |          |       |                        |
|----------------|------|------|----------|-------|----------|-------|------------------------|
| ATCCCTGC db/m2 | db/m | 2318 | 0.054795 | FALSE | 1.667741 | FALSE | Photoreceptor          |
| ATCCCTGC db/m2 | db/m | 3183 | 0.095727 | FALSE | 1.40962  | FALSE | Photoreceptor          |
| ATCCGTCA db/m2 | db/m | 986  | 0.53202  | TRUE  | 6.946108 | TRUE  |                        |
| ATCCGTCC db/m2 | db/m | 1161 | 0.014711 | FALSE | 4.373716 | FALSE | Muller cell            |
| ATCCGTCC db/m2 | db/m | 766  | 0.028754 | FALSE | 0.547095 | FALSE | Endothelia Capillary E |
| ATCCGTCC db/m2 | db/m | 8656 | 0.024105 | FALSE | 0.682432 | FALSE | Photoreceptor          |
| ATCCGTCC db/m2 | db/m | 1696 | 0.115641 | TRUE  | 3.072871 | FALSE |                        |
| ATCCTATA db/m2 | db/m | 793  | 0.004116 | FALSE | 1.86819  | FALSE | Endothelia Capillary E |
| ATCCTATG db/m2 | db/m | 1455 | 0.012303 | FALSE | 1.471135 | FALSE | Endothelia Capillary E |
| ATCCTATT db/m2 | db/m | 657  | 0.032546 | FALSE | 1.974476 | FALSE | Photoreceptor          |
| ATCGATG db/m2  | db/m | 506  | 0.014151 | FALSE | 48.48076 | TRUE  |                        |
| ATCGATG db/m2  | db/m | 7889 | 0.01981  | FALSE | 0.762694 | FALSE | Photoreceptor          |
| ATCGATG db/m2  | db/m | 1203 | 0.053718 | FALSE | 1.901475 | FALSE | Photoreceptor          |
| ATCGATG db/m2  | db/m | 3779 | 0.027758 | FALSE | 0.874976 | FALSE | Photoreceptor          |
| ATCGATG db/m2  | db/m | 544  | 0.007833 | FALSE | 2.685643 | FALSE | Muller cell            |
| ATCGCCTC db/m2 | db/m | 5832 | 0.045165 | FALSE | 1.331898 | FALSE | Photoreceptor          |
| ATCGCCTC db/m2 | db/m | 6674 | 0.024971 | FALSE | 1.315017 | FALSE | Photoreceptor          |
| ATCGCCTC db/m2 | db/m | 1337 | 0.035586 | FALSE | 1.56999  | FALSE | Photoreceptor          |
| ATCGCCTC db/m2 | db/m | 4080 | 0.034954 | FALSE | 1.126954 | FALSE | Endothelia Venous EC   |
| ATCGGAT db/m2  | db/m | 1230 | 0.023682 | FALSE | 2.900362 | FALSE | Neuron                 |
| ATCGGAT db/m2  | db/m | 1484 | 0.016181 | FALSE | 0.456632 | FALSE | Photoreceptor          |
| ATCGGAT db/m2  | db/m | 1746 | 0.014151 | FALSE | 1.573015 | FALSE | Endothelia Capillary E |
| ATCGGATC db/m2 | db/m | 2121 | 0.071958 | FALSE | 2.274861 | FALSE | Photoreceptor          |
| ATCGGATT db/m2 | db/m | 3270 | 0.095727 | FALSE | 1.5212   | FALSE | Neuron                 |
| ATCGGATT db/m2 | db/m | 3060 | 0.023266 | FALSE | 1.182261 | FALSE | Endothelia Capillary E |
| ATCGGCGC db/m2 | db/m | 5333 | 0.038251 | FALSE | 1.190723 | FALSE | Photoreceptor          |
| ATCGTAG db/m2  | db/m | 4261 | 0.043505 | FALSE | 1.190255 | FALSE | Endothelia Venous EC   |
| ATCGTAG db/m2  | db/m | 550  | 0.041154 | FALSE | 40.34179 | TRUE  |                        |
| ATCGTAG db/m2  | db/m | 2735 | 0.030859 | FALSE | 1.194105 | FALSE | Photoreceptor          |
| ATCGTAGC db/m2 | db/m | 1863 | 0.122691 | TRUE  | 17.65925 | TRUE  |                        |
| ATCGTAGC db/m2 | db/m | 301  | 0.048732 | FALSE | 1.137149 | FALSE | Muller cell            |
| ATCGTAGT db/m2 | db/m | 1532 | 0.037564 | FALSE | 1.754774 | FALSE | Photoreceptor          |
| ATCGTCCC db/m2 | db/m | 1509 | 0.036232 | FALSE | 0.742146 | FALSE | Photoreceptor          |
| ATCGTCCC db/m2 | db/m | 2310 | 0.045165 | FALSE | 1.913439 | FALSE | Photoreceptor          |
| ATCGTCCT db/m2 | db/m | 979  | 0.026796 | FALSE | 2.082078 | FALSE | Muller cell            |
| ATCGTGAC db/m2 | db/m | 3876 | 0.009933 | FALSE | 1.456777 | FALSE | Neuron                 |
| ATCGTGAC db/m2 | db/m | 3437 | 0.030859 | FALSE | 1.201852 | FALSE | Photoreceptor          |
| ATCGTGAC db/m2 | db/m | 416  | 0.038251 | FALSE | 33.75    | TRUE  |                        |
| ATCGTGAT db/m2 | db/m | 3148 | 0.040404 | FALSE | 1.250017 | FALSE | Photoreceptor          |
| ATCTCTAG db/m2 | db/m | 657  | 0.078788 | FALSE | 10.44776 | TRUE  |                        |
| ATCTCTAG db/m2 | db/m | 1046 | 0.078788 | FALSE | 3.840344 | FALSE | Muller cell            |
| ATCTCTAG db/m2 | db/m | 2236 | 0.064568 | FALSE | 1.607111 | FALSE | Photoreceptor          |
| ATCTCTAT db/m2 | db/m | 865  | 0.095727 | FALSE | 15.5599  | TRUE  |                        |
| ATCTTCAC db/m2 | db/m | 2714 | 0.014997 | FALSE | 1.336883 | FALSE | Endothelia Capillary E |
| ATCTTCAC db/m2 | db/m | 3122 | 0.008644 | FALSE | 1.202927 | FALSE | Photoreceptor          |
| ATCTTCAG db/m2 | db/m | 2386 | 0.084562 | FALSE | 6.065089 | TRUE  |                        |
| ATCTTCAT db/m2 | db/m | 591  | 0.021286 | FALSE | 42.14338 | TRUE  |                        |

|          |       |      |      |          |       |          |       |                        |
|----------|-------|------|------|----------|-------|----------|-------|------------------------|
| ATCTTCAT | db/m2 | db/m | 348  | 0.03313  | FALSE | 38.09524 | TRUE  |                        |
| ATGAAAG  | db/m2 | db/m | 1707 | 0.078788 | FALSE | 1.143962 | FALSE | Photoreceptor          |
| ATGAAAG  | db/m2 | db/m | 2921 | 0.022455 | FALSE | 0.923151 | FALSE | Photoreceptor          |
| ATGACCA  | db/m2 | db/m | 1330 | 0.013338 | FALSE | 3.893308 | FALSE | Muller cell            |
| ATGACCA  | db/m2 | db/m | 1522 | 0.040404 | FALSE | 1.232822 | FALSE | Photoreceptor          |
| ATGACCA  | db/m2 | db/m | 9050 | 0.031411 | FALSE | 0.614975 | FALSE | Photoreceptor          |
| ATGACCA  | db/m2 | db/m | 437  | 0.059406 | FALSE | 4.751259 | FALSE | Muller cell            |
| ATGAGGG  | db/m2 | db/m | 5604 | 0.021669 | FALSE | 0.912038 | FALSE | Photoreceptor          |
| ATGAGTC  | db/m2 | db/m | 2131 | 0.046025 | FALSE | 1.593666 | FALSE | Photoreceptor          |
| ATGAGTC  | db/m2 | db/m | 2235 | 0.008852 | FALSE | 1.35581  | FALSE | Photoreceptor          |
| ATGAGTC  | db/m2 | db/m | 1486 | 0.024534 | FALSE | 1.855273 | FALSE | Photoreceptor          |
| ATGATCG  | db/m2 | db/m | 1239 | 0.067388 | FALSE | 1.032408 | FALSE | Photoreceptor          |
| ATGATCG  | db/m2 | db/m | 712  | 0.091004 | FALSE | 12.11849 | TRUE  |                        |
| ATGATCG  | db/m2 | db/m | 955  | 0.013338 | FALSE | 1.195241 | FALSE | Endothelia Capillary E |
| ATGATCG  | db/m2 | db/m | 386  | 0.008234 | FALSE | 0        | FALSE | Photoreceptor          |
| ATGCATG  | db/m2 | db/m | 363  | 0.106408 | TRUE  | 38.34197 | TRUE  |                        |
| ATGCATG  | db/m2 | db/m | 696  | 0.029787 | FALSE | 2.365565 | FALSE | Muller cell            |
| ATGCATG  | db/m2 | db/m | 364  | 0.022059 | FALSE | 4.63818  | FALSE | Photoreceptor          |
| ATGCATG  | db/m2 | db/m | 658  | 0.052669 | FALSE | 1.978478 | FALSE | Photoreceptor          |
| ATGCCTCA | db/m2 | db/m | 3068 | 0.028754 | FALSE | 1.284909 | FALSE | Pericyte               |
| ATGGAGG  | db/m2 | db/m | 499  | 0.041154 | FALSE | 4.087788 | FALSE | Endothelia Capillary E |
| ATGGAGG  | db/m2 | db/m | 1854 | 0.038953 | FALSE | 1.822178 | FALSE | Photoreceptor          |
| ATGGAGG  | db/m2 | db/m | 4409 | 0.011805 | FALSE | 1.375247 | FALSE | Endothelia Venous EC   |
| ATGGAGG  | db/m2 | db/m | 390  | 0.031411 | FALSE | 0.918345 | FALSE | Photoreceptor          |
| ATGGATCC | db/m2 | db/m | 6187 | 0.009493 | FALSE | 1.248803 | FALSE | Photoreceptor          |
| ATGGATCC | db/m2 | db/m | 577  | 0.035586 | FALSE | 29.04977 | TRUE  |                        |
| ATGGGAG  | db/m2 | db/m | 2762 | 0.036232 | FALSE | 1.784225 | FALSE | Photoreceptor          |
| ATGGGAG  | db/m2 | db/m | 414  | 0.010384 | FALSE | 55.87583 | TRUE  |                        |
| ATGGGTT  | db/m2 | db/m | 433  | 0.008438 | FALSE | 2.433598 | FALSE | Photoreceptor          |
| ATGGGTT  | db/m2 | db/m | 555  | 0.018761 | FALSE | 3.878611 | FALSE | Muller cell            |
| ATGGGTT  | db/m2 | db/m | 3641 | 0.025416 | FALSE | 1.034386 | FALSE | Photoreceptor          |
| ATGGTTG  | db/m2 | db/m | 6374 | 0.020536 | FALSE | 1.009346 | FALSE | Photoreceptor          |
| ATGGTTG  | db/m2 | db/m | 3899 | 0.011561 | FALSE | 1.105654 | FALSE | Endothelia Capillary E |
| ATGGTTG  | db/m2 | db/m | 645  | 0.00687  | FALSE | 2.523141 | FALSE | Pericyte               |
| ATGTCCCA | db/m2 | db/m | 607  | 0.012557 | FALSE | 46.84271 | TRUE  |                        |
| ATGTCCCA | db/m2 | db/m | 380  | 0.043505 | FALSE | 4.199203 | FALSE | Photoreceptor          |
| ATGTCCCA | db/m2 | db/m | 446  | 0.012557 | FALSE | 1.794777 | FALSE | Photoreceptor          |
| ATGTCCCC | db/m2 | db/m | 954  | 0.036232 | FALSE | 31.64207 | TRUE  |                        |
| ATGTCCCC | db/m2 | db/m | 660  | 0.031973 | FALSE | 3.139538 | FALSE | Pericyte               |
| ATGTCTTG | db/m2 | db/m | 680  | 0.024534 | FALSE | 0.613015 | FALSE | Photoreceptor          |
| ATGTCTTG | db/m2 | db/m | 7427 | 0.032546 | FALSE | 1.04126  | FALSE | Photoreceptor          |
| ATGTCTTT | db/m2 | db/m | 320  | 0.008852 | FALSE | 60.22155 | TRUE  |                        |
| ATGTCTTT | db/m2 | db/m | 2236 | 0.060641 | FALSE | 1.630426 | FALSE | Photoreceptor          |
| ATTACCTA | db/m2 | db/m | 735  | 0.012814 | FALSE | 3.156886 | FALSE | Muller cell            |
| ATTACCTA | db/m2 | db/m | 8526 | 0.061912 | FALSE | 0.921359 | FALSE | Photoreceptor          |
| ATTACCTC | db/m2 | db/m | 642  | 0.042704 | FALSE | 3.955873 | FALSE | Muller cell            |
| ATTACCTC | db/m2 | db/m | 2031 | 0.054795 | FALSE | 1.658868 | FALSE | Endothelia Capillary E |

|                |      |      |          |       |          |       |                        |
|----------------|------|------|----------|-------|----------|-------|------------------------|
| ATTACCTT db/m2 | db/m | 1895 | 0.044326 | FALSE | 1.584618 | FALSE | Photoreceptor          |
| ATTACTCA db/m2 | db/m | 988  | 0.068864 | FALSE | 13.56565 | TRUE  |                        |
| ATTACTCC db/m2 | db/m | 1132 | 0.080645 | FALSE | 4.119496 | FALSE | Muller cell            |
| ATTACTCG db/m2 | db/m | 3731 | 0.037564 | FALSE | 1.708766 | FALSE | Photoreceptor          |
| ATTACTCT db/m2 | db/m | 4731 | 0.022455 | FALSE | 1.222776 | FALSE | Endothelia Venous EC   |
| ATTATCCG db/m2 | db/m | 1593 | 0.04192  | FALSE | 0.623283 | FALSE | Photoreceptor          |
| ATTATCCG db/m2 | db/m | 377  | 0.031411 | FALSE | 3.266889 | FALSE | Muller cell            |
| ATTATCCT db/m2 | db/m | 465  | 0.053718 | FALSE | 36.61376 | TRUE  |                        |
| ATTCACTC db/m2 | db/m | 515  | 0.018422 | FALSE | 1.47672  | FALSE | Photoreceptor          |
| ATTCACTG db/m2 | db/m | 3336 | 0.051646 | FALSE | 1.625655 | FALSE | Photoreceptor          |
| ATTCACTT db/m2 | db/m | 3919 | 0.014151 | FALSE | 1.224601 | FALSE | Photoreceptor          |
| ATTCACTT db/m2 | db/m | 1289 | 0.047807 | FALSE | 1.793133 | FALSE | Photoreceptor          |
| ATTCAGGA db/m2 | db/m | 7461 | 0.022059 | FALSE | 1.072044 | FALSE | Photoreceptor          |
| ATTCATCC db/m2 | db/m | 801  | 0.028251 | FALSE | 3.931729 | FALSE | Neuron                 |
| ATTCATCC db/m2 | db/m | 4597 | 0.044326 | FALSE | 1.237475 | FALSE | Photoreceptor          |
| ATTCATCG db/m2 | db/m | 689  | 0.091004 | FALSE | 4.452425 | FALSE | Muller cell            |
| ATTCATA db/m2  | db/m | 3733 | 0.022059 | FALSE | 1.292283 | FALSE | Endothelia Capillary E |
| ATTCATC db/m2  | db/m | 2149 | 0.016181 | FALSE | 1.594537 | FALSE | Photoreceptor          |
| ATTCATC db/m2  | db/m | 2022 | 0.022857 | FALSE | 0.611855 | FALSE | Photoreceptor          |
| ATTCATC db/m2  | db/m | 1873 | 0.018761 | FALSE | 0.658233 | FALSE | Photoreceptor          |
| ATTCATG db/m2  | db/m | 4957 | 0.091004 | FALSE | 1.284716 | FALSE | Photoreceptor          |
| ATTCCTGA db/m2 | db/m | 5120 | 0.093319 | FALSE | 9.233858 | TRUE  |                        |
| ATTCCTGC db/m2 | db/m | 9363 | 0.018088 | FALSE | 0.768541 | FALSE | Photoreceptor          |
| ATTCCTGC db/m2 | db/m | 584  | 0.013605 | FALSE | 48.72329 | TRUE  |                        |
| ATTCCTGC db/m2 | db/m | 1526 | 0.010846 | FALSE | 1.79053  | FALSE | Endothelia Capillary E |
| ATTCCTGC db/m2 | db/m | 387  | 0.071958 | FALSE | 28.14615 | TRUE  |                        |
| ATTCCTGC db/m2 | db/m | 1912 | 0.012303 | FALSE | 1.383239 | FALSE | Endothelia Capillary E |
| ATTCCTGC db/m2 | db/m | 1749 | 0.046906 | FALSE | 1.0933   | FALSE | Photoreceptor          |
| ATTCCTAA db/m2 | db/m | 310  | 0.058205 | FALSE | 23.12253 | TRUE  |                        |
| ATTCCTAA db/m2 | db/m | 476  | 0.033726 | FALSE | 43.91576 | TRUE  |                        |
| ATTCCTAC db/m2 | db/m | 1107 | 0.028251 | FALSE | 0.782796 | FALSE | Photoreceptor          |
| ATTCCTAC db/m2 | db/m | 6179 | 0.020536 | FALSE | 1.069377 | FALSE | Photoreceptor          |
| ATTCCTAC db/m2 | db/m | 9780 | 0.017434 | FALSE | 0.523826 | FALSE | Photoreceptor          |
| ATTCCTAC db/m2 | db/m | 6437 | 0.017758 | FALSE | 0.722063 | FALSE | Photoreceptor          |
| ATTCCTAC db/m2 | db/m | 4802 | 0.088776 | FALSE | 1.203858 | FALSE | Neuron                 |
| ATTCCTAG db/m2 | db/m | 2692 | 0.091004 | FALSE | 17.57132 | TRUE  |                        |
| ATTCCTAT db/m2 | db/m | 1234 | 0.065957 | FALSE | 0.707531 | FALSE | Photoreceptor          |
| ATTCGTTA db/m2 | db/m | 3017 | 0.034334 | FALSE | 1.302367 | FALSE | Photoreceptor          |
| ATTCGTTG db/m2 | db/m | 640  | 0.022455 | FALSE | 1.070188 | FALSE | Microglia              |
| ATTCGTTT db/m2 | db/m | 376  | 0.047807 | FALSE | 6.382979 | TRUE  |                        |
| ATTCTACA db/m2 | db/m | 9518 | 0.016799 | FALSE | 0.200035 | FALSE | Photoreceptor          |
| ATTCTACC db/m2 | db/m | 448  | 0.010614 | FALSE | 51.26677 | TRUE  |                        |
| ATTCTACG db/m2 | db/m | 546  | 0.024105 | FALSE | 44.03202 | TRUE  |                        |
| ATTCTACG db/m2 | db/m | 590  | 0.063221 | FALSE | 8.269858 | TRUE  |                        |
| ATTCTACT db/m2 | db/m | 4830 | 0.041154 | FALSE | 1.177581 | FALSE | Endothelia Venous EC   |
| ATTCTACT db/m2 | db/m | 450  | 0.043505 | FALSE | 48.57865 | TRUE  |                        |
| ATTCTACT db/m2 | db/m | 2449 | 0.017434 | FALSE | 1.235163 | FALSE | Endothelia Capillary E |



|                 |      |      |          |       |          |       |                        |
|-----------------|------|------|----------|-------|----------|-------|------------------------|
| ATTCTTGA db/m2  | db/m | 604  | 0.036891 | FALSE | 46.8693  | TRUE  |                        |
| ATTCTTGG db/m2  | db/m | 451  | 0.008852 | FALSE | 1.706773 | FALSE | Endothelia Capillary E |
| ATTCTTGT db/m2  | db/m | 6435 | 0.034954 | FALSE | 1.190112 | FALSE | Photoreceptor          |
| ATTGGGT db/m2   | db/m | 4641 | 0.022857 | FALSE | 1.099342 | FALSE | Endothelia Venous EC   |
| ATTGGGT db/m2   | db/m | 898  | 0.017434 | FALSE | 0.529084 | FALSE | Photoreceptor          |
| ATTGTTCA db/m2  | db/m | 804  | 0.084562 | FALSE | 14.58746 | TRUE  |                        |
| ATTGTTCC db/m2  | db/m | 1359 | 0.039671 | FALSE | 0.629446 | FALSE | Photoreceptor          |
| ATTGTTCC db/m2  | db/m | 490  | 0.030318 | FALSE | 27.72809 | TRUE  |                        |
| ATTGTTCCG db/m2 | db/m | 1570 | 0.080645 | FALSE | 1.502096 | FALSE | Photoreceptor          |
| ATTGTTCT db/m2  | db/m | 572  | 0.022857 | FALSE | 41.34349 | TRUE  |                        |
| ATTTACCA db/m2  | db/m | 2891 | 0.016181 | FALSE | 1.432737 | FALSE | Endothelia Aterial EC  |
| ATTTACCC db/m2  | db/m | 7714 | 0.017114 | FALSE | 0.868355 | FALSE | Photoreceptor          |
| ATTTACCG db/m2  | db/m | 1122 | 0.004598 | FALSE | 1.523785 | FALSE | Pericyte               |
| ATTTACCT db/m2  | db/m | 2170 | 0.022857 | FALSE | 1.60664  | FALSE | Pericyte               |
| ATTTACCT db/m2  | db/m | 1885 | 0.040404 | FALSE | 20.14456 | TRUE  |                        |
| ATTTACACA db/m2 | db/m | 3126 | 0.030318 | FALSE | 1.140831 | FALSE | Photoreceptor          |
| ATTTACACA db/m2 | db/m | 397  | 0.047807 | FALSE | 47.39777 | TRUE  |                        |
| ATTTACACC db/m2 | db/m | 6372 | 0.024971 | FALSE | 0.762848 | FALSE | Photoreceptor          |
| ATTTCACT db/m2  | db/m | 504  | 0.015287 | FALSE | 55.57609 | TRUE  |                        |
| ATTTCTGA db/m2  | db/m | 1112 | 0.084562 | FALSE | 3.631327 | FALSE | Muller cell            |
| ATTTCTGA db/m2  | db/m | 1338 | 0.014997 | FALSE | 1.205843 | FALSE | Endothelia Capillary E |
| ATTTCTGC db/m2  | db/m | 2115 | 0.091004 | FALSE | 1.926384 | FALSE | Muller cell            |
| ATTTCTGG db/m2  | db/m | 1222 | 0.038953 | FALSE | 1.090466 | FALSE | Photoreceptor          |
| ATTTCTGT db/m2  | db/m | 9752 | 0.03313  | FALSE | 0.696585 | FALSE | Photoreceptor          |
| ATTTCTGT db/m2  | db/m | 1403 | 0.028251 | FALSE | 1.891973 | FALSE | Photoreceptor          |
| CAAAGAA db/m2   | db/m | 2230 | 0.019455 | FALSE | 0.612293 | FALSE | Photoreceptor          |
| CAAAGAA db/m2   | db/m | 4598 | 0.148377 | TRUE  | 6.658722 | TRUE  |                        |
| CAAAGAA db/m2   | db/m | 2441 | 0.008234 | FALSE | 1.680476 | FALSE | Photoreceptor          |
| CAAAGAA db/m2   | db/m | 2920 | 0.030859 | FALSE | 1.562899 | FALSE | Neuron                 |
| CAACAAC db/m2   | db/m | 677  | 0.098234 | FALSE | 22.50203 | TRUE  |                        |
| CAACAAC db/m2   | db/m | 7557 | 0.130374 | TRUE  | 3.118865 | FALSE |                        |
| CAACAGT db/m2   | db/m | 5593 | 0.164835 | TRUE  | 4.155562 | FALSE |                        |
| CAACAGT db/m2   | db/m | 2798 | 0.051646 | FALSE | 16.7591  | TRUE  |                        |
| CAACAGT db/m2   | db/m | 783  | 0.040404 | FALSE | 3.210777 | FALSE | Muller cell            |
| CAACAGTC db/m2  | db/m | 2469 | 0.015581 | FALSE | 1.692966 | FALSE | Endothelia Capillary E |
| CAACAGTC db/m2  | db/m | 1736 | 0.022857 | FALSE | 4.735291 | FALSE | Muller cell            |
| CAACAGTC db/m2  | db/m | 2655 | 0.003649 | FALSE | 0.774039 | FALSE | Neuron                 |
| CAACAGTT db/m2  | db/m | 543  | 0.011805 | FALSE | 2.43945  | FALSE | Muller cell            |
| CAACCAA db/m2   | db/m | 485  | 0.382671 | TRUE  | 11.09445 | TRUE  |                        |
| CAACCAA db/m2   | db/m | 1331 | 0.030859 | FALSE | 2.995568 | FALSE | Muller cell            |
| CAACCAA db/m2   | db/m | 5592 | 0.055901 | FALSE | 1.216676 | FALSE | Photoreceptor          |
| CAACCAAC db/m2  | db/m | 1735 | 0.016799 | FALSE | 1.42907  | FALSE | Endothelia Capillary E |
| CAACCAAC db/m2  | db/m | 587  | 0.030318 | FALSE | 4.11121  | FALSE | Muller cell            |
| CAACCAAC db/m2  | db/m | 1673 | 0.035586 | FALSE | 4.07445  | FALSE | Muller cell            |
| CAACCAAT db/m2  | db/m | 2133 | 0.026328 | FALSE | 1.349465 | FALSE | Photoreceptor          |
| CAACCTCA db/m2  | db/m | 5087 | 0.036891 | FALSE | 0.936612 | FALSE | Photoreceptor          |
| CAACCTCA db/m2  | db/m | 9002 | 0.024971 | FALSE | 0.715352 | FALSE | Photoreceptor          |

|                            |      |       |          |       |          |       |                        |
|----------------------------|------|-------|----------|-------|----------|-------|------------------------|
| CAACCTCA db/m2             | db/m | 4099  | 0.032546 | FALSE | 1.47327  | FALSE | Photoreceptor          |
| CAACCTCT db/m2             | db/m | 1994  | 0.042704 | FALSE | 0.593046 | FALSE | Photoreceptor          |
| CAACCTCT db/m2             | db/m | 423   | 0.021286 | FALSE | 49.82015 | TRUE  |                        |
| CAACCTCT db/m2             | db/m | 10011 | 0.020171 | FALSE | 0.867199 | FALSE | Photoreceptor          |
| CAACGAT <sup>+</sup> db/m2 | db/m | 8830  | 0.018088 | FALSE | 0.839939 | FALSE | Photoreceptor          |
| CAACGAT <sup>+</sup> db/m2 | db/m | 1954  | 0.047807 | FALSE | 1.717433 | FALSE | Photoreceptor          |
| CAACGAT <sup>+</sup> db/m2 | db/m | 1572  | 0.055901 | FALSE | 19.98203 | TRUE  |                        |
| CAACGGC <sup>+</sup> db/m2 | db/m | 7952  | 0.164835 | TRUE  | 2.590229 | FALSE |                        |
| CAACGGC <sup>+</sup> db/m2 | db/m | 460   | 0.100845 | TRUE  | 18.02575 | TRUE  |                        |
| CAACGGC <sup>+</sup> db/m2 | db/m | 440   | 0.023682 | FALSE | 2.356744 | FALSE | Muller cell            |
| CAACGGC <sup>+</sup> db/m2 | db/m | 345   | 0.013876 | FALSE | 57.99257 | TRUE  |                        |
| CAACGGC <sup>+</sup> db/m2 | db/m | 378   | 0.011561 | FALSE | 1.398676 | FALSE | Neuron                 |
| CAACGGC <sup>+</sup> db/m2 | db/m | 368   | 0.060641 | FALSE | 4.018464 | FALSE | Pericyte               |
| CAACGGC <sup>+</sup> db/m2 | db/m | 252   | 0.025868 | FALSE | 60.92965 | TRUE  |                        |
| CAAGACT <sup>+</sup> db/m2 | db/m | 329   | 0.055901 | FALSE | 20.19802 | TRUE  |                        |
| CAAGACT <sup>+</sup> db/m2 | db/m | 2279  | 0.018088 | FALSE | 1.693935 | FALSE | Neuron                 |
| CAAGACT <sup>+</sup> db/m2 | db/m | 1872  | 0.041154 | FALSE | 1.457765 | FALSE | Photoreceptor          |
| CAAGAGG <sup>+</sup> db/m2 | db/m | 691   | 0.011805 | FALSE | 0.258888 | FALSE | Photoreceptor          |
| CAAGCTA <sup>+</sup> db/m2 | db/m | 2697  | 0.024534 | FALSE | 1.472873 | FALSE | Endothelia Capillary E |
| CAAGCTA <sup>+</sup> db/m2 | db/m | 349   | 0.035586 | FALSE | 54.93097 | TRUE  |                        |
| CAAGCTA <sup>+</sup> db/m2 | db/m | 506   | 0.126437 | TRUE  | 6.575342 | TRUE  |                        |
| CAAGCTA <sup>+</sup> db/m2 | db/m | 4260  | 0.020171 | FALSE | 1.23621  | FALSE | Endothelia Capillary E |
| CAAGGGA <sup>+</sup> db/m2 | db/m | 3137  | 0.038953 | FALSE | 1.418953 | FALSE | Neuron                 |
| CAAGGGA <sup>+</sup> db/m2 | db/m | 886   | 0.033726 | FALSE | 3.477385 | FALSE | Muller cell            |
| CAAGGGA <sup>+</sup> db/m2 | db/m | 1363  | 0.024105 | FALSE | 2.304707 | FALSE | Endothelia Capillary E |
| CAAGGGA <sup>+</sup> db/m2 | db/m | 906   | 0.030318 | FALSE | 1.890584 | FALSE | Photoreceptor          |
| CAATACG <sup>+</sup> db/m2 | db/m | 4066  | 0.060641 | FALSE | 1.360796 | FALSE | Endothelia Venous EC   |
| CAATCGA <sup>+</sup> db/m2 | db/m | 1674  | 0.019455 | FALSE | 1.304117 | FALSE | Endothelia Capillary E |
| CAATCGA <sup>+</sup> db/m2 | db/m | 7348  | 0.013876 | FALSE | 0.869227 | FALSE | Photoreceptor          |
| CAATTTCA db/m2             | db/m | 7486  | 0.020171 | FALSE | 1.102418 | FALSE | Photoreceptor          |
| CAATTTCC db/m2             | db/m | 559   | 0.034954 | FALSE | 1.819105 | FALSE | Photoreceptor          |
| CAATTTCC db/m2             | db/m | 407   | 0.159016 | TRUE  | 6.472492 | TRUE  |                        |
| CAATTTCC db/m2             | db/m | 989   | 0.049679 | FALSE | 1.184254 | FALSE | Photoreceptor          |
| CAATTTCC db/m2             | db/m | 1363  | 0.022857 | FALSE | 32.35026 | TRUE  |                        |
| CACAACA <sup>+</sup> db/m2 | db/m | 3014  | 0.048732 | FALSE | 1.454232 | FALSE | Photoreceptor          |
| CACAACA <sup>+</sup> db/m2 | db/m | 6928  | 0.025868 | FALSE | 1.124597 | FALSE | Photoreceptor          |
| CACACAA <sup>+</sup> db/m2 | db/m | 9394  | 0.017434 | FALSE | 0.661156 | FALSE | Photoreceptor          |
| CACACAA <sup>+</sup> db/m2 | db/m | 3676  | 0.041154 | FALSE | 1.222968 | FALSE | Microglia              |
| CACAGAT <sup>+</sup> db/m2 | db/m | 604   | 0.054795 | FALSE | 3.929466 | FALSE | Muller cell            |
| CACAGAT <sup>+</sup> db/m2 | db/m | 3049  | 0.036232 | FALSE | 1.096878 | FALSE | Photoreceptor          |
| CACAGATT db/m2             | db/m | 1331  | 0.034334 | FALSE | 0.883349 | FALSE | Photoreceptor          |
| CACAGATT db/m2             | db/m | 1592  | 0.15354  | TRUE  | 28.52732 | TRUE  |                        |
| CACAGATT db/m2             | db/m | 6483  | 0.022857 | FALSE | 0.86934  | FALSE | Photoreceptor          |
| CACAGATT db/m2             | db/m | 483   | 0.011561 | FALSE | 3.10482  | FALSE | Endothelia Capillary E |
| CACAGGC <sup>+</sup> db/m2 | db/m | 4590  | 0.060641 | FALSE | 1.122711 | FALSE | Neuron                 |
| CACAGGC <sup>+</sup> db/m2 | db/m | 1657  | 0.016488 | FALSE | 0.563596 | FALSE | Photoreceptor          |
| CACATGA <sup>+</sup> db/m2 | db/m | 2569  | 0.018088 | FALSE | 1.255164 | FALSE | Photoreceptor          |

|          |       |      |       |          |       |          |       |                         |
|----------|-------|------|-------|----------|-------|----------|-------|-------------------------|
| CACATGA  | db/m2 | db/m | 2776  | 0.026796 | FALSE | 1.918191 | FALSE | Neuron                  |
| CACATGAC | db/m2 | db/m | 5297  | 0.009933 | FALSE | 1.176303 | FALSE | Endothelia Venous EC    |
| CACATGAC | db/m2 | db/m | 10085 | 0.023682 | FALSE | 0.69443  | FALSE | Photoreceptor           |
| CACCAAAC | db/m2 | db/m | 1118  | 0.016488 | FALSE | 0.376091 | FALSE | Photoreceptor           |
| CACCAAAC | db/m2 | db/m | 344   | 0.064568 | FALSE | 4.023621 | FALSE | Pericyte                |
| CACCAAAC | db/m2 | db/m | 3271  | 0.019106 | FALSE | 1.249942 | FALSE | Photoreceptor           |
| CACCAAAC | db/m2 | db/m | 3848  | 0.029266 | FALSE | 1.488698 | FALSE | Endothelia Capillary EC |
| CACCAAAT | db/m2 | db/m | 5496  | 0.018422 | FALSE | 0.450066 | FALSE | Photoreceptor           |
| CACCGTTA | db/m2 | db/m | 494   | 0.030318 | FALSE | 1.235857 | FALSE | Muller cell             |
| CACCGTTC | db/m2 | db/m | 3377  | 0.064568 | FALSE | 14.15064 | TRUE  |                         |
| CACCGTTC | db/m2 | db/m | 1020  | 0.058205 | FALSE | 1.808939 | FALSE | Photoreceptor           |
| CACGAAT  | db/m2 | db/m | 5459  | 0.010846 | FALSE | 1.209712 | FALSE | Photoreceptor           |
| CACGAATC | db/m2 | db/m | 1967  | 0.008032 | FALSE | 1.089392 | FALSE | Endothelia Capillary EC |
| CACGAATC | db/m2 | db/m | 383   | 0.034954 | FALSE | 23.92739 | TRUE  |                         |
| CACGAATC | db/m2 | db/m | 1428  | 0.033726 | FALSE | 1.481413 | FALSE | Endothelia Capillary EC |
| CACGGGT  | db/m2 | db/m | 566   | 0.03313  | FALSE | 3.59644  | FALSE | Microglia               |
| CACGGGT  | db/m2 | db/m | 448   | 0.046025 | FALSE | 2.9527   | FALSE | Endothelia Capillary EC |
| CACGGGT  | db/m2 | db/m | 2600  | 0.034334 | FALSE | 1.229209 | FALSE | Neuron                  |
| CACGTGGC | db/m2 | db/m | 388   | 0.040404 | FALSE | 2.357158 | FALSE | Photoreceptor           |
| CACGTTCA | db/m2 | db/m | 513   | 0.059406 | FALSE | 2.977609 | FALSE | Endothelia Capillary EC |
| CACGTTCC | db/m2 | db/m | 2887  | 0.052669 | FALSE | 2.84492  | FALSE | Muller cell             |
| CACTGAA  | db/m2 | db/m | 1210  | 0.112477 | TRUE  | 19.59863 | TRUE  |                         |
| CACTGAA  | db/m2 | db/m | 3725  | 0.012303 | FALSE | 1.217204 | FALSE | Endothelia Venous EC    |
| CACTGAAT | db/m2 | db/m | 939   | 0.052669 | FALSE | 4.97281  | FALSE | Endothelia Aterial EC   |
| CACTGTCC | db/m2 | db/m | 5257  | 0.043505 | FALSE | 1.098284 | FALSE | Photoreceptor           |
| CACTGTCC | db/m2 | db/m | 1628  | 0.110901 | TRUE  | 3.84216  | FALSE |                         |
| CACTTCGC | db/m2 | db/m | 2531  | 0.014429 | FALSE | 0.984873 | FALSE | Endothelia Capillary EC |
| CACTTCGT | db/m2 | db/m | 1749  | 0.011081 | FALSE | 1.351561 | FALSE | Endothelia Capillary EC |
| CAGAGCC  | db/m2 | db/m | 837   | 0.088776 | FALSE | 12.35955 | TRUE  |                         |
| CAGAGCC  | db/m2 | db/m | 939   | 0.022857 | FALSE | 4.838246 | FALSE | Muller cell             |
| CAGATACC | db/m2 | db/m | 434   | 0.027273 | FALSE | 43.3892  | TRUE  |                         |
| CAGATACC | db/m2 | db/m | 1499  | 0.034954 | FALSE | 7.272727 | TRUE  |                         |
| CAGATACC | db/m2 | db/m | 3663  | 0.007833 | FALSE | 1.324083 | FALSE | Neuron                  |
| CAGATACC | db/m2 | db/m | 652   | 0.037564 | FALSE | 0.547986 | FALSE | Photoreceptor           |
| CAGATACT | db/m2 | db/m | 476   | 0.014997 | FALSE | 2.308453 | FALSE | Endothelia Capillary EC |
| CAGATACT | db/m2 | db/m | 445   | 0.039671 | FALSE | 2.105536 | FALSE | Photoreceptor           |
| CAGATCA  | db/m2 | db/m | 1677  | 0.022455 | FALSE | 1.052234 | FALSE | Photoreceptor           |
| CAGATCA  | db/m2 | db/m | 524   | 0.026796 | FALSE | 2.81033  | FALSE | Photoreceptor           |
| CAGATCAT | db/m2 | db/m | 2130  | 0.018761 | FALSE | 1.434978 | FALSE | Endothelia Capillary EC |
| CAGATTG  | db/m2 | db/m | 1135  | 0.017758 | FALSE | 1.76583  | FALSE | Microglia               |
| CAGATTGC | db/m2 | db/m | 512   | 0.014151 | FALSE | 35.2657  | TRUE  |                         |
| CAGATTGC | db/m2 | db/m | 324   | 0.010614 | FALSE | 66.01256 | TRUE  |                         |
| CAGCAATC | db/m2 | db/m | 3666  | 0.040404 | FALSE | 0.773857 | FALSE | Photoreceptor           |
| CAGCAATT | db/m2 | db/m | 493   | 0.010846 | FALSE | 0.556933 | FALSE | Photoreceptor           |
| CAGCACG  | db/m2 | db/m | 2436  | 0.011805 | FALSE | 1.40137  | FALSE | Endothelia Capillary EC |
| CAGCACG  | db/m2 | db/m | 2491  | 0.013876 | FALSE | 1.175417 | FALSE | Endothelia Capillary EC |
| CAGCACG  | db/m2 | db/m | 3480  | 0.039671 | FALSE | 1.564514 | FALSE | Photoreceptor           |

|                |      |      |          |       |          |       |                        |
|----------------|------|------|----------|-------|----------|-------|------------------------|
| CAGCAGC(db/m2  | db/m | 391  | 0.037564 | FALSE | 3.014811 | FALSE | Muller cell            |
| CAGCAGC db/m2  | db/m | 3636 | 0.018761 | FALSE | 0.885224 | FALSE | Photoreceptor          |
| CAGCGTG(db/m2  | db/m | 555  | 0.058205 | FALSE | 1.347959 | FALSE | Photoreceptor          |
| CAGCGTG db/m2  | db/m | 3098 | 0.008852 | FALSE | 1.238078 | FALSE | Photoreceptor          |
| CAGGCCA(db/m2  | db/m | 2435 | 0.060641 | FALSE | 17.52614 | TRUE  |                        |
| CAGGCCA(db/m2  | db/m | 3091 | 0.022857 | FALSE | 0.943915 | FALSE | Photoreceptor          |
| CAGGCCA db/m2  | db/m | 1439 | 0.024971 | FALSE | 0.728046 | FALSE | Photoreceptor          |
| CAGGCCA db/m2  | db/m | 7458 | 0.017758 | FALSE | 0.892623 | FALSE | Photoreceptor          |
| CAGGCCA db/m2  | db/m | 767  | 0.053718 | FALSE | 4.200198 | FALSE | Muller cell            |
| CAGGGCT(db/m2  | db/m | 3873 | 0.014711 | FALSE | 1.227556 | FALSE | Endothelia Venous EC   |
| CAGGGCT db/m2  | db/m | 987  | 0.055901 | FALSE | 4.668288 | FALSE | Muller cell            |
| CAGGTAT db/m2  | db/m | 4418 | 0.020171 | FALSE | 2.294077 | FALSE | Neuron                 |
| CAGGTAT db/m2  | db/m | 157  | 0.10565  | TRUE  | 0.230947 | FALSE |                        |
| CAGGTAT db/m2  | db/m | 1143 | 0.022857 | FALSE | 1.85476  | FALSE | Photoreceptor          |
| CAGTGCG db/m2  | db/m | 1641 | 0.026796 | FALSE | 0.709986 | FALSE | Photoreceptor          |
| CAGTGCG db/m2  | db/m | 371  | 0.047807 | FALSE | 13.41912 | TRUE  |                        |
| CAGTGCG db/m2  | db/m | 3076 | 0.082569 | FALSE | 1.794649 | FALSE | Endothelia Capillary E |
| CAGTGCG db/m2  | db/m | 2346 | 0.016488 | FALSE | 0.35393  | FALSE | Photoreceptor          |
| CAGTGCG db/m2  | db/m | 1909 | 0.060641 | FALSE | 2.163061 | FALSE | Photoreceptor          |
| CAGTGCG db/m2  | db/m | 1259 | 0.045165 | FALSE | 1.234016 | FALSE | Photoreceptor          |
| CAGTTAG db/m2  | db/m | 190  | 0.012052 | FALSE | 71.42857 | TRUE  |                        |
| CAGTTAG db/m2  | db/m | 481  | 0.040404 | FALSE | 28.16754 | TRUE  |                        |
| CAGTTAG db/m2  | db/m | 510  | 0.038251 | FALSE | 4.826935 | FALSE | Muller cell            |
| CAGTTAG db/m2  | db/m | 283  | 0.016181 | FALSE | 58.15991 | TRUE  |                        |
| CAGTTAG db/m2  | db/m | 4630 | 0.209157 | TRUE  | 6.577657 | TRUE  |                        |
| CAGTTAG db/m2  | db/m | 5441 | 0.013876 | FALSE | 0.764986 | FALSE | Endothelia Venous EC   |
| CAGTTAG db/m2  | db/m | 3036 | 0.052669 | FALSE | 1.166633 | FALSE | Photoreceptor          |
| CAGTTCCC db/m2 | db/m | 1562 | 0.034954 | FALSE | 0.985095 | FALSE | Photoreceptor          |
| CAGTTCCC db/m2 | db/m | 2649 | 0.016488 | FALSE | 1.274037 | FALSE | Endothelia Capillary E |
| CAGTTCCC db/m2 | db/m | 1667 | 0.357022 | TRUE  | 1.236264 | FALSE |                        |
| CAGTTCCT db/m2 | db/m | 1136 | 0.078788 | FALSE | 2.502805 | FALSE | Photoreceptor          |
| CATAAGC db/m2  | db/m | 542  | 0.034954 | FALSE | 36.98147 | TRUE  |                        |
| CATAAGC db/m2  | db/m | 673  | 0.025416 | FALSE | 4.613729 | FALSE | Muller cell            |
| CATAAGCT db/m2 | db/m | 640  | 0.031973 | FALSE | 4.148922 | FALSE | Muller cell            |
| CATACAG db/m2  | db/m | 1126 | 0.046025 | FALSE | 19.70031 | TRUE  |                        |
| CATACAG db/m2  | db/m | 274  | 0.109375 | TRUE  | 5.278174 | TRUE  |                        |
| CATACAG db/m2  | db/m | 779  | 0.032546 | FALSE | 3.106592 | FALSE | Muller cell            |
| CATACAGT db/m2 | db/m | 2310 | 0.020908 | FALSE | 1.265847 | FALSE | Endothelia Capillary E |
| CATACAGT db/m2 | db/m | 633  | 0.060641 | FALSE | 3.741131 | FALSE | Muller cell            |
| CATACCCA db/m2 | db/m | 2127 | 0.020908 | FALSE | 1.602391 | FALSE | Endothelia Capillary E |
| CATACCCG db/m2 | db/m | 488  | 0.075259 | FALSE | 30.50847 | TRUE  |                        |
| CATACTTA db/m2 | db/m | 1093 | 0.013605 | FALSE | 0.595562 | FALSE | Photoreceptor          |
| CATAGAC db/m2  | db/m | 3159 | 0.010157 | FALSE | 1.716269 | FALSE | Photoreceptor          |
| CATAGACT db/m2 | db/m | 2243 | 0.026328 | FALSE | 1.779106 | FALSE | Endothelia Capillary E |
| CATCAAG db/m2  | db/m | 6436 | 0.020908 | FALSE | 0.943123 | FALSE | Photoreceptor          |
| CATCAAGT db/m2 | db/m | 493  | 0.029266 | FALSE | 0.580389 | FALSE | Photoreceptor          |
| CATCCACA db/m2 | db/m | 627  | 0.08663  | FALSE | 13.02235 | TRUE  |                        |

|                |      |       |          |       |          |       |                        |
|----------------|------|-------|----------|-------|----------|-------|------------------------|
| CATCCACG db/m2 | db/m | 360   | 0.106408 | TRUE  | 10.74074 | TRUE  |                        |
| CATCCACG db/m2 | db/m | 5149  | 0.052669 | FALSE | 1.464007 | FALSE | Photoreceptor          |
| CATCCACT db/m2 | db/m | 4134  | 0.007833 | FALSE | 1.196877 | FALSE | Photoreceptor          |
| CATCCACT db/m2 | db/m | 152   | 0.012052 | FALSE | 81.57129 | TRUE  |                        |
| CATCCCAC db/m2 | db/m | 1182  | 0.080645 | FALSE | 7.874648 | TRUE  |                        |
| CATCCCAG db/m2 | db/m | 2676  | 0.013605 | FALSE | 1.204699 | FALSE | Endothelia Capillary E |
| CATCCCAT db/m2 | db/m | 991   | 0.017758 | FALSE | 0.73035  | FALSE | Photoreceptor          |
| CATCGCTC db/m2 | db/m | 593   | 0.061912 | FALSE | 16.64964 | TRUE  |                        |
| CATCGCTC db/m2 | db/m | 257   | 0.022857 | FALSE | 63.21975 | TRUE  |                        |
| CATCGCTT db/m2 | db/m | 4987  | 0.042704 | FALSE | 1.346187 | FALSE | Neuron                 |
| CATCGGG db/m2  | db/m | 1134  | 0.017758 | FALSE | 0.869456 | FALSE | Photoreceptor          |
| CATCGTCC db/m2 | db/m | 1517  | 0.032546 | FALSE | 3.387862 | FALSE | Pericyte               |
| CATCGTCC db/m2 | db/m | 5301  | 0.013074 | FALSE | 0.885952 | FALSE | Photoreceptor          |
| CATCGTCC db/m2 | db/m | 535   | 0.010846 | FALSE | 0.168788 | FALSE | Photoreceptor          |
| CATGAGT db/m2  | db/m | 1107  | 0.009933 | FALSE | 1.210481 | FALSE | Photoreceptor          |
| CATGAGTC db/m2 | db/m | 469   | 0.034954 | FALSE | 4.887283 | FALSE | Muller cell            |
| CATGAGTT db/m2 | db/m | 443   | 0.020536 | FALSE | 4.540143 | FALSE | Muller cell            |
| CATGCAA db/m2  | db/m | 4444  | 0.011319 | FALSE | 1.271516 | FALSE | Endothelia Capillary E |
| CATGCAAC db/m2 | db/m | 733   | 0.057037 | FALSE | 4.273086 | FALSE | Muller cell            |
| CATGCAAT db/m2 | db/m | 717   | 0.048732 | FALSE | 2.108226 | FALSE | Muller cell            |
| CATGCCTT db/m2 | db/m | 594   | 0.138889 | TRUE  | 9.680967 | TRUE  |                        |
| CATGCGG db/m2  | db/m | 371   | 0.014429 | FALSE | 63.64713 | TRUE  |                        |
| CATGCGG db/m2  | db/m | 2886  | 0.012052 | FALSE | 1.160808 | FALSE | Endothelia Aterial EC  |
| CATGCTCA db/m2 | db/m | 496   | 0.020536 | FALSE | 47.80793 | TRUE  |                        |
| CATGCTCT db/m2 | db/m | 2580  | 0.019455 | FALSE | 1.120523 | FALSE | Endothelia Capillary E |
| CATGGATC db/m2 | db/m | 1674  | 0.025868 | FALSE | 0.568797 | FALSE | Photoreceptor          |
| CATGGATT db/m2 | db/m | 3037  | 0.017434 | FALSE | 1.851184 | FALSE | Photoreceptor          |
| CATGGATT db/m2 | db/m | 3338  | 0.020171 | FALSE | 0.936084 | FALSE | Photoreceptor          |
| CATGGTAC db/m2 | db/m | 430   | 0.025416 | FALSE | 1.7327   | FALSE | Microglia              |
| CATGGTAC db/m2 | db/m | 564   | 0.058205 | FALSE | 17.94055 | TRUE  |                        |
| CATGGTAC db/m2 | db/m | 2136  | 0.031411 | FALSE | 1.404109 | FALSE | Endothelia Capillary E |
| CATGGTAT db/m2 | db/m | 271   | 0.020908 | FALSE | 63.55653 | TRUE  |                        |
| CATTCATG db/m2 | db/m | 4217  | 0.031411 | FALSE | 0.800004 | FALSE | Photoreceptor          |
| CATTCATT db/m2 | db/m | 7916  | 0.024971 | FALSE | 0.83988  | FALSE | Photoreceptor          |
| CATTCCGG db/m2 | db/m | 5980  | 0.039671 | FALSE | 1.327856 | FALSE | Photoreceptor          |
| CATTCTAC db/m2 | db/m | 10441 | 0.014429 | FALSE | 0.262662 | FALSE | Photoreceptor          |
| CATTGAGC db/m2 | db/m | 462   | 0.064568 | FALSE | 0.866653 | FALSE | Photoreceptor          |
| CATTGAGC db/m2 | db/m | 467   | 0.03313  | FALSE | 0.849398 | FALSE | Muller cell            |
| CATTGAGC db/m2 | db/m | 383   | 0.021286 | FALSE | 41.97531 | TRUE  |                        |
| CATTGCCA db/m2 | db/m | 7288  | 0.015287 | FALSE | 0.938563 | FALSE | Photoreceptor          |
| CATTGCCA db/m2 | db/m | 6612  | 0.055901 | FALSE | 0.984045 | FALSE | Photoreceptor          |
| CATTGCCG db/m2 | db/m | 5644  | 0.007636 | FALSE | 1.344636 | FALSE | Photoreceptor          |
| CATTGCCT db/m2 | db/m | 402   | 0.037564 | FALSE | 4.157775 | FALSE | Muller cell            |
| CATTGTTA db/m2 | db/m | 500   | 0.080645 | FALSE | 2.434445 | FALSE | Photoreceptor          |
| CATTGTTA db/m2 | db/m | 1497  | 0.064568 | FALSE | 1.37594  | FALSE | Photoreceptor          |
| CATTGTTA db/m2 | db/m | 1995  | 0.019455 | FALSE | 1.276324 | FALSE | Photoreceptor          |
| CATTGTTG db/m2 | db/m | 3383  | 0.033726 | FALSE | 1.662713 | FALSE | Photoreceptor          |

|                |      |      |          |       |          |       |                        |
|----------------|------|------|----------|-------|----------|-------|------------------------|
| CATTGTTT db/m2 | db/m | 678  | 0.071958 | FALSE | 12.39148 | TRUE  |                        |
| CATTGTTT db/m2 | db/m | 5325 | 0.048732 | FALSE | 1.324501 | FALSE | Photoreceptor          |
| CATTTCAA db/m2 | db/m | 1649 | 0.04192  | FALSE | 18.75153 | TRUE  |                        |
| CATTTCAC db/m2 | db/m | 8772 | 0.021286 | FALSE | 0.673785 | FALSE | Photoreceptor          |
| CATTTCAC db/m2 | db/m | 2393 | 0.019455 | FALSE | 1.502923 | FALSE | Endothelia Capillary E |
| CATTTCAG db/m2 | db/m | 6205 | 0.015879 | FALSE | 1.17346  | FALSE | Photoreceptor          |
| CATTTCAT db/m2 | db/m | 519  | 0.016799 | FALSE | 2.185014 | FALSE | Muller cell            |
| CCAATGAC db/m2 | db/m | 5037 | 0.039671 | FALSE | 1.215323 | FALSE | Photoreceptor          |
| CCAATGAC db/m2 | db/m | 639  | 0.04192  | FALSE | 4.871389 | FALSE | Muller cell            |
| CCAATTTA db/m2 | db/m | 5012 | 0.014151 | FALSE | 1.109867 | FALSE | Photoreceptor          |
| CCAATTTT db/m2 | db/m | 5962 | 0.075259 | FALSE | 1.138578 | FALSE | Endothelia Venous EC   |
| CCAATTTT db/m2 | db/m | 6740 | 0.019455 | FALSE | 1.029423 | FALSE | Photoreceptor          |
| CCAATTTG db/m2 | db/m | 719  | 0.048732 | FALSE | 3.563258 | FALSE | Muller cell            |
| CCACAAA db/m2  | db/m | 1714 | 0.016799 | FALSE | 4.338177 | FALSE | Muller cell            |
| CCACAAA db/m2  | db/m | 504  | 0.034334 | FALSE | 3.15877  | FALSE | Muller cell            |
| CCACAAAC db/m2 | db/m | 9338 | 0.013338 | FALSE | 0.783962 | FALSE | Photoreceptor          |
| CCACACTA db/m2 | db/m | 658  | 0.485327 | TRUE  | 7.066381 | TRUE  |                        |
| CCACACTG db/m2 | db/m | 1648 | 0.046025 | FALSE | 2.120697 | FALSE | Pericyte               |
| CCACCATC db/m2 | db/m | 7728 | 0.014429 | FALSE | 0.862836 | FALSE | Photoreceptor          |
| CCACCATC db/m2 | db/m | 2576 | 0.067388 | FALSE | 1.478073 | FALSE | Photoreceptor          |
| CCACGAG db/m2  | db/m | 732  | 0.068864 | FALSE | 21.01167 | TRUE  |                        |
| CCACGAG db/m2  | db/m | 3390 | 0.093319 | FALSE | 1.498258 | FALSE | Endothelia Capillary E |
| CCACGAG db/m2  | db/m | 4783 | 0.013074 | FALSE | 1.142668 | FALSE | Photoreceptor          |
| CCACGTTC db/m2 | db/m | 3270 | 0.029787 | FALSE | 1.688177 | FALSE | Photoreceptor          |
| CCACGTTC db/m2 | db/m | 2965 | 0.030318 | FALSE | 1.581202 | FALSE | Endothelia Capillary E |
| CCACGTTT db/m2 | db/m | 952  | 0.044326 | FALSE | 0.857044 | FALSE | Photoreceptor          |
| CCACTTGC db/m2 | db/m | 3002 | 0.036891 | FALSE | 1.70251  | FALSE | Photoreceptor          |
| CCATAAGC db/m2 | db/m | 483  | 0.033726 | FALSE | 30.10753 | TRUE  |                        |
| CCATAAGC db/m2 | db/m | 8895 | 0.047807 | FALSE | 0.912864 | FALSE | Photoreceptor          |
| CCATAAGC db/m2 | db/m | 3707 | 0.044326 | FALSE | 1.100754 | FALSE | Endothelia Venous EC   |
| CCATCACC db/m2 | db/m | 9061 | 0.026796 | FALSE | 0.791743 | FALSE | Photoreceptor          |
| CCATCACC db/m2 | db/m | 363  | 0.031973 | FALSE | 24.36975 | TRUE  |                        |
| CCCAACTA db/m2 | db/m | 370  | 0.091004 | FALSE | 3.002079 | FALSE | Muller cell            |
| CCCAACTA db/m2 | db/m | 2571 | 0.029266 | FALSE | 1.118161 | FALSE | Photoreceptor          |
| CCCAACTC db/m2 | db/m | 5380 | 0.043505 | FALSE | 1.273871 | FALSE | Photoreceptor          |
| CCCAACTC db/m2 | db/m | 568  | 0.04192  | FALSE | 33.84095 | TRUE  |                        |
| CCCAACTT db/m2 | db/m | 560  | 0.010384 | FALSE | 47.03059 | TRUE  |                        |
| CCCATTGA db/m2 | db/m | 1092 | 0.019106 | FALSE | 2.31247  | FALSE | Photoreceptor          |
| CCCATTGA db/m2 | db/m | 522  | 0.026796 | FALSE | 1.805069 | FALSE | Muller cell            |
| CCCATTGC db/m2 | db/m | 1311 | 0.035586 | FALSE | 0.716219 | FALSE | Photoreceptor          |
| CCCATTGC db/m2 | db/m | 1818 | 0.078788 | FALSE | 1.890259 | FALSE | Photoreceptor          |
| CCCATTGT db/m2 | db/m | 667  | 0.052669 | FALSE | 19.14729 | TRUE  |                        |
| CCCGAAGC db/m2 | db/m | 815  | 0.044326 | FALSE | 1.185965 | FALSE | Photoreceptor          |
| CCCGAAGC db/m2 | db/m | 4848 | 0.098234 | FALSE | 1.951905 | FALSE | Neuron                 |
| CCCGGAA db/m2  | db/m | 597  | 0.018088 | FALSE | 4.359262 | FALSE | Muller cell            |
| CCCGGAA db/m2  | db/m | 739  | 0.012814 | FALSE | 0.363146 | FALSE | Photoreceptor          |
| CCCTAACC db/m2 | db/m | 1033 | 0.051646 | FALSE | 3.226132 | FALSE | Muller cell            |

|                |      |      |          |       |          |       |                        |
|----------------|------|------|----------|-------|----------|-------|------------------------|
| CCCTAACG db/m2 | db/m | 2237 | 0.01981  | FALSE | 0.606514 | FALSE | Photoreceptor          |
| CCCTAACG db/m2 | db/m | 327  | 0.042704 | FALSE | 4.606423 | FALSE | Muller cell            |
| CCCTCAAC db/m2 | db/m | 3480 | 0.004598 | FALSE | 1.270726 | FALSE | Neuron                 |
| CCCTCAAG db/m2 | db/m | 2659 | 0.035586 | FALSE | 1.500021 | FALSE | Endothelia Capillary E |
| CCCTCAAG db/m2 | db/m | 886  | 0.022059 | FALSE | 0.537733 | FALSE | Muller cell            |
| CCCTCAAG db/m2 | db/m | 410  | 0.011805 | FALSE | 55.47839 | TRUE  |                        |
| CCCTCTCA db/m2 | db/m | 176  | 0.012557 | FALSE | 73.01981 | TRUE  |                        |
| CCCTCTCC db/m2 | db/m | 2075 | 0.028251 | FALSE | 1.905957 | FALSE | Photoreceptor          |
| CCCTCTCC db/m2 | db/m | 6845 | 0.046906 | FALSE | 1.180232 | FALSE | Photoreceptor          |
| CCCTCTCG db/m2 | db/m | 590  | 0.022455 | FALSE | 28.7839  | TRUE  |                        |
| CCCTGATG db/m2 | db/m | 4600 | 0.05065  | FALSE | 1.290521 | FALSE | Photoreceptor          |
| CCCTGATT db/m2 | db/m | 5480 | 0.012557 | FALSE | 1.088384 | FALSE | Endothelia Venous EC   |
| CCGAACG db/m2  | db/m | 432  | 0.022059 | FALSE | 1.525962 | FALSE | Photoreceptor          |
| CCGAACG db/m2  | db/m | 311  | 0.012052 | FALSE | 55.74058 | TRUE  |                        |
| CCGAACG db/m2  | db/m | 4315 | 0.035586 | FALSE | 1.328029 | FALSE | Photoreceptor          |
| CCGAACG db/m2  | db/m | 1124 | 0.031411 | FALSE | 2.360949 | FALSE | Endothelia Capillary E |
| CCGATCTT db/m2 | db/m | 2070 | 0.004116 | FALSE | 0.744794 | FALSE | Neuron                 |
| CCGATGG db/m2  | db/m | 722  | 0.08663  | FALSE | 10.08646 | TRUE  |                        |
| CCGATGG db/m2  | db/m | 407  | 0.03313  | FALSE | 3.18413  | FALSE | Photoreceptor          |
| CCGCAAG db/m2  | db/m | 2459 | 0.007058 | FALSE | 1.948591 | FALSE | Photoreceptor          |
| CCGCAAG db/m2  | db/m | 4641 | 0.04192  | FALSE | 1.207861 | FALSE | Photoreceptor          |
| CCGCAAG db/m2  | db/m | 210  | 0.011319 | FALSE | 72.32433 | TRUE  |                        |
| CCGCAAG db/m2  | db/m | 4572 | 0.012303 | FALSE | 1.01155  | FALSE | Endothelia Venous EC   |
| CCGGACA db/m2  | db/m | 724  | 0.029787 | FALSE | 1.051094 | FALSE | Photoreceptor          |
| CCGGACA db/m2  | db/m | 666  | 0.055901 | FALSE | 3.713705 | FALSE | Endothelia Capillary E |
| CCGGACA db/m2  | db/m | 2724 | 0.059406 | FALSE | 1.864618 | FALSE | Endothelia Venous EC   |
| CCGGACA db/m2  | db/m | 436  | 0.070386 | FALSE | 3.636125 | FALSE | Muller cell            |
| CCGGACA db/m2  | db/m | 920  | 0.012303 | FALSE | 42.75574 | TRUE  |                        |
| CCGGGTA db/m2  | db/m | 2549 | 0.027758 | FALSE | 1.395178 | FALSE | Endothelia Venous EC   |
| CCGGGTA db/m2  | db/m | 614  | 0.059406 | FALSE | 23.09913 | TRUE  |                        |
| CCGGGTA db/m2  | db/m | 5470 | 0.024534 | FALSE | 1.152303 | FALSE | Endothelia Venous EC   |
| CCGGGTA db/m2  | db/m | 1553 | 0.032546 | FALSE | 1.354947 | FALSE | Photoreceptor          |
| CCGGGTA db/m2  | db/m | 6002 | 0.024534 | FALSE | 1.419646 | FALSE | Photoreceptor          |
| CCGGTAG db/m2  | db/m | 1938 | 0.048732 | FALSE | 2.69208  | FALSE | Muller cell            |
| CCGGTAG db/m2  | db/m | 1894 | 0.082569 | FALSE | 2.685623 | FALSE | Photoreceptor          |
| CCGGTAG db/m2  | db/m | 501  | 0.01981  | FALSE | 41.53721 | TRUE  |                        |
| CCGGTGA db/m2  | db/m | 2756 | 0.017114 | FALSE | 0.850985 | FALSE | Photoreceptor          |
| CCGGTGA db/m2  | db/m | 607  | 0.075259 | FALSE | 2.825892 | FALSE | Muller cell            |
| CCGTAGG db/m2  | db/m | 1301 | 0.041154 | FALSE | 1.928994 | FALSE | Photoreceptor          |
| CCGTAGG db/m2  | db/m | 5586 | 0.020536 | FALSE | 1.075354 | FALSE | Photoreceptor          |
| CCGTGAG db/m2  | db/m | 464  | 0.034334 | FALSE | 27.61394 | TRUE  |                        |
| CCGTTCAC db/m2 | db/m | 1885 | 0.014997 | FALSE | 0.746704 | FALSE | Photoreceptor          |
| CCGTTCAG db/m2 | db/m | 348  | 0.018088 | FALSE | 53.62182 | TRUE  |                        |
| CCGTTCAT db/m2 | db/m | 2669 | 0.023266 | FALSE | 1.224237 | FALSE | Endothelia Capillary E |
| CCTAACCC db/m2 | db/m | 2274 | 0.007441 | FALSE | 1.56033  | FALSE | Endothelia Capillary E |
| CCTAAGAC db/m2 | db/m | 1641 | 0.01981  | FALSE | 2.89475  | FALSE | Muller cell            |
| CCTAAGAC db/m2 | db/m | 5213 | 0.026328 | FALSE | 0.979139 | FALSE | Photoreceptor          |

|                |      |      |          |       |          |       |                        |
|----------------|------|------|----------|-------|----------|-------|------------------------|
| CCTAAGAC db/m2 | db/m | 672  | 0.071958 | FALSE | 4.03572  | FALSE | Muller cell            |
| CCTAAGAC db/m2 | db/m | 2230 | 0.084562 | FALSE | 0.805689 | FALSE | Endothelia Venous EC   |
| CCTAAGAT db/m2 | db/m | 4147 | 0.013605 | FALSE | 1.197256 | FALSE | Endothelia Venous EC   |
| CCTACGTC db/m2 | db/m | 6998 | 0.019106 | FALSE | 0.90037  | FALSE | Photoreceptor          |
| CCTACGTC db/m2 | db/m | 510  | 0.019455 | FALSE | 3.362815 | FALSE | Muller cell            |
| CCTACGTC db/m2 | db/m | 497  | 0.021669 | FALSE | 4.580695 | FALSE | Muller cell            |
| CCTACGTT db/m2 | db/m | 1551 | 0.075259 | FALSE | 1.25279  | FALSE | Photoreceptor          |
| CCTATCGC db/m2 | db/m | 4266 | 0.016181 | FALSE | 1.379802 | FALSE | Endothelia Venous EC   |
| CCTATCGC db/m2 | db/m | 3721 | 0.01981  | FALSE | 1.131121 | FALSE | Endothelia Venous EC   |
| CCTCAACT db/m2 | db/m | 9279 | 0.011805 | FALSE | 0.525203 | FALSE | Photoreceptor          |
| CCTCAACT db/m2 | db/m | 1218 | 0.018088 | FALSE | 39.12059 | TRUE  |                        |
| CCTCAACT db/m2 | db/m | 2448 | 0.011319 | FALSE | 0.303536 | FALSE | Photoreceptor          |
| CCTCACAC db/m2 | db/m | 9230 | 0.031411 | FALSE | 0.757336 | FALSE | Photoreceptor          |
| CCTCACAC db/m2 | db/m | 4203 | 0.031973 | FALSE | 0.771341 | FALSE | Photoreceptor          |
| CCTCACAC db/m2 | db/m | 436  | 0.031411 | FALSE | 40.67796 | TRUE  |                        |
| CCTCACAG db/m2 | db/m | 2195 | 0.01981  | FALSE | 1.597814 | FALSE | Endothelia Capillary E |
| CCTCATGA db/m2 | db/m | 844  | 0.020171 | FALSE | 1.110266 | FALSE | Photoreceptor          |
| CCTCATGC db/m2 | db/m | 982  | 0.025416 | FALSE | 0.528034 | FALSE | Photoreceptor          |
| CCTCATGT db/m2 | db/m | 2937 | 0.044326 | FALSE | 1.691423 | FALSE | Endothelia Capillary E |
| CCTCCAAG db/m2 | db/m | 644  | 0.030318 | FALSE | 46.93396 | TRUE  |                        |
| CCTCCTCC db/m2 | db/m | 2138 | 0.012052 | FALSE | 1.427648 | FALSE | Photoreceptor          |
| CCTCCTCC db/m2 | db/m | 1130 | 0.061912 | FALSE | 1.798813 | FALSE | Neuron                 |
| CCTCCTCT db/m2 | db/m | 2100 | 0.013074 | FALSE | 1.311297 | FALSE | Endothelia Capillary E |
| CCTCTAGA db/m2 | db/m | 1127 | 0.078788 | FALSE | 1.56585  | FALSE | Muller cell            |
| CCTCTAGA db/m2 | db/m | 2144 | 0.041154 | FALSE | 1.369239 | FALSE | Photoreceptor          |
| CCTCTAGC db/m2 | db/m | 594  | 0.041154 | FALSE | 3.835164 | FALSE | Endothelia Capillary E |
| CCTCTAGC db/m2 | db/m | 5365 | 0.005264 | FALSE | 1.076482 | FALSE | Neuron                 |
| CCTCTCCA db/m2 | db/m | 676  | 0.041154 | FALSE | 1.92768  | FALSE | Microglia              |
| CCTCTCCG db/m2 | db/m | 368  | 0.021286 | FALSE | 2.884809 | FALSE | Muller cell            |
| CCTGCATC db/m2 | db/m | 5239 | 0.023682 | FALSE | 1.163884 | FALSE | Endothelia Aterial EC  |
| CCTGCATC db/m2 | db/m | 4638 | 0.015581 | FALSE | 1.000702 | FALSE | Photoreceptor          |
| CCTGTTGA db/m2 | db/m | 2231 | 0.018761 | FALSE | 1.252604 | FALSE | Endothelia Capillary E |
| CCTGTTGT db/m2 | db/m | 734  | 0.031973 | FALSE | 3.356836 | FALSE | Muller cell            |
| CCTTCAGA db/m2 | db/m | 2548 | 0.115404 | TRUE  | 4.288755 | FALSE |                        |
| CCTTCAGA db/m2 | db/m | 581  | 0.017758 | FALSE | 4.674564 | FALSE | Photoreceptor          |
| CCTTCAGC db/m2 | db/m | 727  | 0.080645 | FALSE | 3.297612 | FALSE | Muller cell            |
| CCTTCAGC db/m2 | db/m | 1796 | 0.028754 | FALSE | 2.395951 | FALSE | Photoreceptor          |
| CCTTCAGC db/m2 | db/m | 2296 | 0.027273 | FALSE | 1.084804 | FALSE | Endothelia Venous EC   |
| CCTTCAGC db/m2 | db/m | 456  | 0.059406 | FALSE | 10.33386 | TRUE  |                        |
| CCTTGTGA db/m2 | db/m | 4499 | 0.026328 | FALSE | 1.256635 | FALSE | Endothelia Capillary E |
| CCTTGTGC db/m2 | db/m | 4084 | 0.021286 | FALSE | 1.539149 | FALSE | Photoreceptor          |
| CCTTTGGA db/m2 | db/m | 897  | 0.042704 | FALSE | 1.585471 | FALSE | Photoreceptor          |
| CCTTTGGA db/m2 | db/m | 541  | 0.061912 | FALSE | 6.666667 | TRUE  |                        |
| CGAAGGA db/m2  | db/m | 2015 | 0.030318 | FALSE | 1.483451 | FALSE | Photoreceptor          |
| CGAAGGA db/m2  | db/m | 3191 | 0.010384 | FALSE | 1.8283   | FALSE | Photoreceptor          |
| CGAAGGA db/m2  | db/m | 4355 | 0.003048 | FALSE | 1.192498 | FALSE | Neuron                 |
| CGAAGTT db/m2  | db/m | 159  | 0.011805 | FALSE | 77.14959 | TRUE  |                        |



|                |      |      |          |       |          |       |                        |
|----------------|------|------|----------|-------|----------|-------|------------------------|
| CGAAGTT/ db/m2 | db/m | 702  | 0.030318 | FALSE | 38.55976 | TRUE  |                        |
| CGAAGTT( db/m2 | db/m | 473  | 0.063221 | FALSE | 34.63074 | TRUE  |                        |
| CGAATTG( db/m2 | db/m | 2870 | 0.022059 | FALSE | 1.363196 | FALSE | Endothelia Capillary E |
| CGAATTG( db/m2 | db/m | 511  | 0.059406 | FALSE | 0.691865 | FALSE | Photoreceptor          |
| CGACAGC( db/m2 | db/m | 1569 | 0.034954 | FALSE | 1.075569 | FALSE | Photoreceptor          |
| CGACAGC( db/m2 | db/m | 6103 | 0.022455 | FALSE | 0.558438 | FALSE | Photoreceptor          |
| CGACAGC( db/m2 | db/m | 5777 | 0.08663  | FALSE | 1.056586 | FALSE | Endothelia Venous EC   |
| CGAGAAG. db/m2 | db/m | 350  | 0.080645 | FALSE | 3.851111 | FALSE | Endothelia Capillary E |
| CGAGGAA. db/m2 | db/m | 386  | 0.052669 | FALSE | 3.559467 | FALSE | Muller cell            |
| CGAGGAA. db/m2 | db/m | 3479 | 0.046906 | FALSE | 1.802945 | FALSE | Photoreceptor          |
| CGAGGAA  db/m2 | db/m | 779  | 0.013338 | FALSE | 56.47197 | TRUE  |                        |
| CGAGGAA  db/m2 | db/m | 972  | 0.013605 | FALSE | 41.51525 | TRUE  |                        |
| CGAGGAA' db/m2 | db/m | 1877 | 0.061912 | FALSE | 2.814254 | FALSE | Photoreceptor          |
| CGAGGCT( db/m2 | db/m | 898  | 0.016488 | FALSE | 0.717689 | FALSE | Photoreceptor          |
| CGAGGCT( db/m2 | db/m | 4913 | 0.030859 | FALSE | 1.202067 | FALSE | Photoreceptor          |
| CGAGGCT( db/m2 | db/m | 3149 | 0.035586 | FALSE | 1.345046 | FALSE | Photoreceptor          |
| CGAGGCT( db/m2 | db/m | 3589 | 0.009493 | FALSE | 1.526253 | FALSE | Photoreceptor          |
| CGAGGCT  db/m2 | db/m | 403  | 0.177638 | TRUE  | 27.58621 | TRUE  |                        |
| CGAGTGC/ db/m2 | db/m | 2661 | 0.025416 | FALSE | 1.078449 | FALSE | Photoreceptor          |
| CGAGTGC( db/m2 | db/m | 2304 | 0.095727 | FALSE | 1.750058 | FALSE | Photoreceptor          |
| CGAGTGC( db/m2 | db/m | 2405 | 0.011319 | FALSE | 1.216204 | FALSE | Endothelia Capillary E |
| CGAGTGC( db/m2 | db/m | 1603 | 0.027273 | FALSE | 1.680869 | FALSE | Photoreceptor          |
| CGAGTTA( db/m2 | db/m | 403  | 0.022857 | FALSE | 18.69783 | TRUE  |                        |
| CGAGTTA( db/m2 | db/m | 6052 | 0.020171 | FALSE | 0.687458 | FALSE | Photoreceptor          |
| CGAGTTA( db/m2 | db/m | 9349 | 0.018088 | FALSE | 0.895088 | FALSE | Photoreceptor          |
| CGAGTTA  db/m2 | db/m | 810  | 0.071958 | FALSE | 2.344465 | FALSE | Muller cell            |
| CGAGTTA  db/m2 | db/m | 1311 | 0.038251 | FALSE | 0.879319 | FALSE | Photoreceptor          |
| CGATCGG/ db/m2 | db/m | 516  | 0.064568 | FALSE | 3.936157 | FALSE | Neuron                 |
| CGATCGG( db/m2 | db/m | 647  | 0.112037 | TRUE  | 2.466598 | FALSE |                        |
| CGATCGG( db/m2 | db/m | 3826 | 0.030318 | FALSE | 1.212988 | FALSE | Endothelia Venous EC   |
| CGATGGC( db/m2 | db/m | 4033 | 0.007636 | FALSE | 1.401587 | FALSE | Photoreceptor          |
| CGATGGC( db/m2 | db/m | 424  | 0.038953 | FALSE | 4.981418 | FALSE | Muller cell            |
| CGCAGGT/ db/m2 | db/m | 3328 | 0.008644 | FALSE | 1.542767 | FALSE | Photoreceptor          |
| CGCAGGT/ db/m2 | db/m | 7837 | 0.028251 | FALSE | 0.944781 | FALSE | Photoreceptor          |
| CGCAGGT( db/m2 | db/m | 1354 | 0.005782 | FALSE | 2.145917 | FALSE | Endothelia Capillary E |
| CGCAGGT( db/m2 | db/m | 5419 | 0.015287 | FALSE | 0.884212 | FALSE | Photoreceptor          |
| CGCAGGT( db/m2 | db/m | 390  | 0.080645 | FALSE | 48.47529 | TRUE  |                        |
| CGCAGGT( db/m2 | db/m | 242  | 0.022857 | FALSE | 68.75    | TRUE  |                        |
| CGCAGGT  db/m2 | db/m | 4552 | 0.038251 | FALSE | 1.304595 | FALSE | Endothelia Venous EC   |
| CGCAGGT  db/m2 | db/m | 457  | 0.03313  | FALSE | 2.852278 | FALSE | Muller cell            |
| CGCATAA( db/m2 | db/m | 688  | 0.070386 | FALSE | 3.146312 | FALSE | Endothelia Capillary E |
| CGCATAA  db/m2 | db/m | 647  | 0.032546 | FALSE | 3.179899 | FALSE | Endothelia Capillary E |
| CGCATAA  db/m2 | db/m | 9360 | 0.040404 | FALSE | 0.647312 | FALSE | Photoreceptor          |
| CGCATGG/ db/m2 | db/m | 2218 | 0.058205 | FALSE | 1.665708 | FALSE | Pericyte               |
| CGCATGG( db/m2 | db/m | 1318 | 0.076994 | FALSE | 2.458508 | FALSE | Endothelia Capillary E |
| CGCATGG  db/m2 | db/m | 554  | 0.057037 | FALSE | 1.15618  | FALSE | Photoreceptor          |
| CGCCAGA/ db/m2 | db/m | 412  | 0.045165 | FALSE | 1.358416 | FALSE | Muller cell            |

|          |       |      |      |          |       |          |       |                        |
|----------|-------|------|------|----------|-------|----------|-------|------------------------|
| CGCCAGAG | db/m2 | db/m | 2496 | 0.122691 | TRUE  | 12.22633 | TRUE  |                        |
| CGCCAGAG | db/m2 | db/m | 2850 | 0.100845 | TRUE  | 14.21767 | TRUE  |                        |
| CGCCAGAG | db/m2 | db/m | 4423 | 0.019455 | FALSE | 1.017926 | FALSE | Photoreceptor          |
| CGCCAGAG | db/m2 | db/m | 2047 | 0.088776 | FALSE | 18.34806 | TRUE  |                        |
| CGCCATTC | db/m2 | db/m | 3876 | 0.014711 | FALSE | 1.546038 | FALSE | Endothelia Capillary E |
| CGCCATTC | db/m2 | db/m | 1776 | 0.034334 | FALSE | 2.235195 | FALSE | Photoreceptor          |
| CGCCATTT | db/m2 | db/m | 403  | 0.010384 | FALSE | 48.25581 | TRUE  |                        |
| CGCCATTT | db/m2 | db/m | 660  | 0.038251 | FALSE | 3.426307 | FALSE | Muller cell            |
| CGCGTGAG | db/m2 | db/m | 422  | 0.057037 | FALSE | 1.090601 | FALSE | Photoreceptor          |
| CGCGTGAG | db/m2 | db/m | 386  | 0.043505 | FALSE | 2.844156 | FALSE | Endothelia Capillary E |
| CGGAACCA | db/m2 | db/m | 343  | 0.15354  | TRUE  | 25.4902  | TRUE  |                        |
| CGGAACCA | db/m2 | db/m | 4106 | 0.030859 | FALSE | 1.444971 | FALSE | Endothelia Venous EC   |
| CGGAACCA | db/m2 | db/m | 2475 | 0.024971 | FALSE | 1.733045 | FALSE | Endothelia Capillary E |
| CGGAACCA | db/m2 | db/m | 1516 | 0.119124 | TRUE  | 16.30246 | TRUE  |                        |
| CGGAACCA | db/m2 | db/m | 3572 | 0.019106 | FALSE | 1.201844 | FALSE | Endothelia Aterial EC  |
| CGGAATTG | db/m2 | db/m | 877  | 0.028754 | FALSE | 1.232881 | FALSE | Photoreceptor          |
| CGGACACA | db/m2 | db/m | 2529 | 0.08663  | FALSE | 2.277455 | FALSE | Muller cell            |
| CGGACACA | db/m2 | db/m | 465  | 0.034954 | FALSE | 3.117545 | FALSE | Photoreceptor          |
| CGGAGAA  | db/m2 | db/m | 3668 | 0.045165 | FALSE | 1.964146 | FALSE | Photoreceptor          |
| CGGAGAA  | db/m2 | db/m | 1136 | 0.022857 | FALSE | 2.066114 | FALSE | Muller cell            |
| CGGAGAA  | db/m2 | db/m | 665  | 0.048732 | FALSE | 2.246394 | FALSE | Endothelia Capillary E |
| CGGAGAA  | db/m2 | db/m | 366  | 0.041154 | FALSE | 2.125841 | FALSE | Photoreceptor          |
| CGGCAGTG | db/m2 | db/m | 1460 | 0.031973 | FALSE | 28.17402 | TRUE  |                        |
| CGGCAGTG | db/m2 | db/m | 352  | 0.038251 | FALSE | 37.20238 | TRUE  |                        |
| CGGCAGTG | db/m2 | db/m | 629  | 0.048732 | FALSE | 4.622842 | FALSE | Muller cell            |
| CGGCAGTG | db/m2 | db/m | 375  | 0.033726 | FALSE | 44.47345 | TRUE  |                        |
| CGGCAGTG | db/m2 | db/m | 1828 | 0.046025 | FALSE | 3.857828 | FALSE | Muller cell            |
| CGGGACTG | db/m2 | db/m | 682  | 0.014151 | FALSE | 2.995604 | FALSE | Endothelia Capillary E |
| CGGGACTG | db/m2 | db/m | 448  | 0.013074 | FALSE | 55.50993 | TRUE  |                        |
| CGGGCATG | db/m2 | db/m | 2370 | 0.026796 | FALSE | 0.867202 | FALSE | Photoreceptor          |
| CGGGCATG | db/m2 | db/m | 575  | 0.076994 | FALSE | 3.217683 | FALSE | Muller cell            |
| CGGGTCAG | db/m2 | db/m | 468  | 0.036891 | FALSE | 25.49261 | TRUE  |                        |
| CGGGTGTG | db/m2 | db/m | 608  | 0.030859 | FALSE | 4.775434 | FALSE | Muller cell            |
| CGGGTGTG | db/m2 | db/m | 7895 | 0.036232 | FALSE | 0.994643 | FALSE | Photoreceptor          |
| CGGGTGTG | db/m2 | db/m | 456  | 0.010846 | FALSE | 47.03316 | TRUE  |                        |
| CGGTCAGG | db/m2 | db/m | 596  | 0.088776 | FALSE | 3.722889 | FALSE | Muller cell            |
| CGGTCAGG | db/m2 | db/m | 2241 | 0.019106 | FALSE | 1.358929 | FALSE | Endothelia Capillary E |
| CGGTCAGG | db/m2 | db/m | 750  | 0.252153 | TRUE  | 7.67148  | TRUE  |                        |
| CGTAAGTG | db/m2 | db/m | 2812 | 0.068864 | FALSE | 1.709709 | FALSE | Photoreceptor          |
| CGTAAGTG | db/m2 | db/m | 328  | 0.088776 | FALSE | 3.651424 | FALSE | Pericyte               |
| CGTAAGTG | db/m2 | db/m | 3138 | 0.027758 | FALSE | 1.696298 | FALSE | Photoreceptor          |
| CGTAAGTG | db/m2 | db/m | 2640 | 0.016488 | FALSE | 1.31465  | FALSE | Photoreceptor          |
| CGTAAGTG | db/m2 | db/m | 3418 | 0.049679 | FALSE | 1.720966 | FALSE | Neuron                 |
| CGTAAGTG | db/m2 | db/m | 1258 | 0.023682 | FALSE | 0.735561 | FALSE | Photoreceptor          |
| CGTAAGTG | db/m2 | db/m | 3040 | 0.014151 | FALSE | 1.417386 | FALSE | Endothelia Venous EC   |
| CGTAATGG | db/m2 | db/m | 898  | 0.057037 | FALSE | 1.198249 | FALSE | Photoreceptor          |
| CGTAATGG | db/m2 | db/m | 1603 | 0.051646 | FALSE | 15.65298 | TRUE  |                        |

|                 |      |      |          |       |          |       |                        |
|-----------------|------|------|----------|-------|----------|-------|------------------------|
| CGTAATGC db/m2  | db/m | 4927 | 0.112477 | TRUE  | 10.89747 | TRUE  |                        |
| CGTAATGC db/m2  | db/m | 524  | 0.026328 | FALSE | 48.41884 | TRUE  |                        |
| CGTAGTA db/m2   | db/m | 2156 | 0.025416 | FALSE | 1.765628 | FALSE | Endothelia Capillary E |
| CGTAGTA db/m2   | db/m | 454  | 0.027758 | FALSE | 1.862177 | FALSE | Photoreceptor          |
| CGTAGTA db/m2   | db/m | 5586 | 0.011081 | FALSE | 1.19063  | FALSE | Photoreceptor          |
| CGTAGTAC db/m2  | db/m | 1050 | 0.005607 | FALSE | 1.715394 | FALSE | Endothelia Capillary E |
| CGTAGTAC db/m2  | db/m | 4245 | 0.045165 | FALSE | 1.2878   | FALSE | Photoreceptor          |
| CGTAGTAC db/m2  | db/m | 412  | 0.029266 | FALSE | 3.248248 | FALSE | Muller cell            |
| CGTAGTAT db/m2  | db/m | 611  | 0.019106 | FALSE | 3.547801 | FALSE | Muller cell            |
| CGTAGTAT db/m2  | db/m | 6182 | 0.036232 | FALSE | 0.954245 | FALSE | Photoreceptor          |
| CGTCAAA db/m2   | db/m | 5104 | 0.018761 | FALSE | 0.801969 | FALSE | Photoreceptor          |
| CGTCAAA db/m2   | db/m | 573  | 0.043505 | FALSE | 0.887227 | FALSE | Photoreceptor          |
| CGTCAAA db/m2   | db/m | 412  | 0.038953 | FALSE | 29.2011  | TRUE  |                        |
| CGTCCATA db/m2  | db/m | 3133 | 0.033726 | FALSE | 1.164921 | FALSE | Endothelia Capillary E |
| CGTGAATC db/m2  | db/m | 1478 | 0.043505 | FALSE | 24.28276 | TRUE  |                        |
| CGTGAATC db/m2  | db/m | 434  | 0.053718 | FALSE | 42.57908 | TRUE  |                        |
| CGTGAATC db/m2  | db/m | 420  | 0.022455 | FALSE | 73.31525 | TRUE  |                        |
| CGTGAATC db/m2  | db/m | 1533 | 0.049679 | FALSE | 3.339626 | FALSE | Muller cell            |
| CGTGATA db/m2   | db/m | 2073 | 0.018088 | FALSE | 1.54552  | FALSE | Photoreceptor          |
| CGTGATA db/m2   | db/m | 2233 | 0.128726 | TRUE  | 2.679218 | FALSE |                        |
| CGTGATAC db/m2  | db/m | 1692 | 0.032546 | FALSE | 1.239366 | FALSE | Photoreceptor          |
| CGTGCTTA db/m2  | db/m | 8414 | 0.058205 | FALSE | 1.118761 | FALSE | Neuron                 |
| CGTGCTTC db/m2  | db/m | 378  | 0.041154 | FALSE | 4.641885 | FALSE | Pericyte               |
| CGTGCTTC db/m2  | db/m | 1171 | 0.033726 | FALSE | 0.817586 | FALSE | Photoreceptor          |
| CGTGCTTT db/m2  | db/m | 2471 | 0.020536 | FALSE | 1.49829  | FALSE | Endothelia Capillary E |
| CGTGTCTC db/m2  | db/m | 5017 | 0.014711 | FALSE | 0.993411 | FALSE | Photoreceptor          |
| CGTGTCTC db/m2  | db/m | 898  | 0.13452  | TRUE  | 12.87554 | TRUE  |                        |
| CGTTAGA db/m2   | db/m | 4755 | 0.024971 | FALSE | 1.091654 | FALSE | Photoreceptor          |
| CGTTAGA db/m2   | db/m | 8804 | 0.023682 | FALSE | 0.998602 | FALSE | Photoreceptor          |
| CGTTAGAC db/m2  | db/m | 689  | 0.016181 | FALSE | 2.982507 | FALSE | Endothelia Capillary E |
| CGTTAGAC db/m2  | db/m | 329  | 0.009493 | FALSE | 62.4183  | TRUE  |                        |
| CGTTAGAT db/m2  | db/m | 3425 | 0.100845 | TRUE  | 5.689917 | TRUE  |                        |
| CGTTCTGC db/m2  | db/m | 345  | 0.126437 | TRUE  | 18.802   | TRUE  |                        |
| CGTTGGG db/m2   | db/m | 399  | 0.24     | TRUE  | 20.77922 | TRUE  |                        |
| CGTTGGG db/m2   | db/m | 1764 | 0.016181 | FALSE | 2.172476 | FALSE | Endothelia Capillary E |
| CGTTGGG db/m2   | db/m | 1233 | 0.035586 | FALSE | 28.68725 | TRUE  |                        |
| CGTTGGG db/m2   | db/m | 604  | 0.024971 | FALSE | 2.457416 | FALSE | Muller cell            |
| CTAACCCC db/m2  | db/m | 4357 | 0.035586 | FALSE | 1.16149  | FALSE | Endothelia Venous EC   |
| CTAACCCC db/m2  | db/m | 456  | 0.017758 | FALSE | 2.114954 | FALSE | Photoreceptor          |
| CTAACCCG db/m2  | db/m | 7866 | 0.012052 | FALSE | 0.849654 | FALSE | Photoreceptor          |
| CTAACCCCT db/m2 | db/m | 3245 | 0.012814 | FALSE | 0.387219 | FALSE | Photoreceptor          |
| CTAACTTA db/m2  | db/m | 2649 | 0.026328 | FALSE | 2.50093  | FALSE | Pericyte               |
| CTAACTTA db/m2  | db/m | 435  | 0.024534 | FALSE | 48.64376 | TRUE  |                        |
| CTAACTTA db/m2  | db/m | 3058 | 0.017434 | FALSE | 0.917165 | FALSE | Photoreceptor          |
| CTAACTTC db/m2  | db/m | 1760 | 0.042704 | FALSE | 2.053648 | FALSE | Photoreceptor          |
| CTAACTTT db/m2  | db/m | 1579 | 0.010614 | FALSE | 1.137273 | FALSE | Endothelia Capillary E |
| CTAACTTT db/m2  | db/m | 2014 | 0.024105 | FALSE | 1.113753 | FALSE | Endothelia Capillary E |

|                |      |      |          |       |          |       |                        |
|----------------|------|------|----------|-------|----------|-------|------------------------|
| CTAACTTT db/m2 | db/m | 554  | 0.031411 | FALSE | 3.353584 | FALSE | Muller cell            |
| CTAAGTG db/m2  | db/m | 6368 | 0.051646 | FALSE | 0.935794 | FALSE | Photoreceptor          |
| CTACAGAC db/m2 | db/m | 916  | 0.023266 | FALSE | 3.210994 | FALSE | Muller cell            |
| CTACAGAC db/m2 | db/m | 9715 | 0.025868 | FALSE | 0.403151 | FALSE | Photoreceptor          |
| CTACAGAC db/m2 | db/m | 2132 | 0.011319 | FALSE | 1.115991 | FALSE | Endothelia Capillary E |
| CTACAGAT db/m2 | db/m | 2969 | 0.026328 | FALSE | 1.661647 | FALSE | Endothelia Capillary E |
| CTACATTA db/m2 | db/m | 488  | 0.034954 | FALSE | 14.7541  | TRUE  |                        |
| CTACATTA db/m2 | db/m | 3058 | 0.019106 | FALSE | 0.966864 | FALSE | Photoreceptor          |
| CTACATTC db/m2 | db/m | 982  | 0.018088 | FALSE | 0.560196 | FALSE | Photoreceptor          |
| CTACATTC db/m2 | db/m | 467  | 0.044326 | FALSE | 3.267832 | FALSE | Muller cell            |
| CTACATTC db/m2 | db/m | 666  | 0.036232 | FALSE | 2.334257 | FALSE | Muller cell            |
| CTACATTG db/m2 | db/m | 1077 | 0.078788 | FALSE | 2.623951 | FALSE | Muller cell            |
| CTACATTG db/m2 | db/m | 257  | 0.009933 | FALSE | 73.20313 | TRUE  |                        |
| CTACATTT db/m2 | db/m | 395  | 0.05065  | FALSE | 4.06812  | FALSE | Muller cell            |
| CTACCCAA db/m2 | db/m | 681  | 0.05065  | FALSE | 21.64949 | TRUE  |                        |
| CTACCCAT db/m2 | db/m | 163  | 0.016181 | FALSE | 74.77593 | TRUE  |                        |
| CTACCTGA db/m2 | db/m | 537  | 0.084562 | FALSE | 22.44898 | TRUE  |                        |
| CTACCTGG db/m2 | db/m | 772  | 0.038953 | FALSE | 2.293552 | FALSE | Endothelia Capillary E |
| CTACGGG db/m2  | db/m | 928  | 0.058205 | FALSE | 3.430412 | FALSE | Photoreceptor          |
| CTACGGG db/m2  | db/m | 803  | 0.016181 | FALSE | 30.50739 | TRUE  |                        |
| CTACGGG db/m2  | db/m | 8237 | 0.017434 | FALSE | 0.797018 | FALSE | Photoreceptor          |
| CTACGGG db/m2  | db/m | 564  | 0.011805 | FALSE | 3.211972 | FALSE | Endothelia Aterial EC  |
| CTACGGG db/m2  | db/m | 3043 | 0.019106 | FALSE | 1.068407 | FALSE | Photoreceptor          |
| CTACTATC db/m2 | db/m | 384  | 0.060641 | FALSE | 2.075878 | FALSE | Photoreceptor          |
| CTACTATG db/m2 | db/m | 537  | 0.03313  | FALSE | 32.47078 | TRUE  |                        |
| CTACTATG db/m2 | db/m | 644  | 0.030859 | FALSE | 37.5     | TRUE  |                        |
| CTAGACAT db/m2 | db/m | 1282 | 0.042704 | FALSE | 1.946585 | FALSE | Endothelia Capillary E |
| CTAGACAT db/m2 | db/m | 449  | 0.019455 | FALSE | 38.96226 | TRUE  |                        |
| CTAGGTA db/m2  | db/m | 1724 | 0.043505 | FALSE | 1.762607 | FALSE | Endothelia Aterial EC  |
| CTAGGTA db/m2  | db/m | 469  | 0.084562 | FALSE | 21.56177 | TRUE  |                        |
| CTAGGTAC db/m2 | db/m | 8289 | 0.023266 | FALSE | 0.838165 | FALSE | Photoreceptor          |
| CTAGGTAT db/m2 | db/m | 8534 | 0.024105 | FALSE | 0.677445 | FALSE | Photoreceptor          |
| CTAGGTAT db/m2 | db/m | 3205 | 0.022455 | FALSE | 1.451922 | FALSE | Endothelia Capillary E |
| CTATAGGT db/m2 | db/m | 2901 | 0.046906 | FALSE | 1.02772  | FALSE | Photoreceptor          |
| CTATCCGC db/m2 | db/m | 1792 | 0.040404 | FALSE | 1.303805 | FALSE | Photoreceptor          |
| CTATCCGC db/m2 | db/m | 1751 | 0.031973 | FALSE | 2.026625 | FALSE | Pericyte               |
| CTATCCGC db/m2 | db/m | 1634 | 0.049679 | FALSE | 1.87328  | FALSE | Photoreceptor          |
| CTATCTAA db/m2 | db/m | 547  | 0.093319 | FALSE | 3.292762 | FALSE | Muller cell            |
| CTATCTAC db/m2 | db/m | 1047 | 0.012052 | FALSE | 1.366223 | FALSE | Photoreceptor          |
| CTATCTAC db/m2 | db/m | 754  | 0.019455 | FALSE | 0.476327 | FALSE | Photoreceptor          |
| CTCAACCC db/m2 | db/m | 1017 | 0.05065  | FALSE | 45.81778 | TRUE  |                        |
| CTCAACCG db/m2 | db/m | 3326 | 0.025416 | FALSE | 1.455499 | FALSE | Photoreceptor          |
| CTCAACCT db/m2 | db/m | 3508 | 0.034334 | FALSE | 1.270999 | FALSE | Photoreceptor          |
| CTCAAGAT db/m2 | db/m | 3799 | 0.078788 | FALSE | 1.759829 | FALSE | Photoreceptor          |
| CTCAAGAT db/m2 | db/m | 2387 | 0.061912 | FALSE | 2.012741 | FALSE | Photoreceptor          |
| CTCAATTA db/m2 | db/m | 1618 | 0.012052 | FALSE | 1.21847  | FALSE | Pericyte               |
| CTCAATTC db/m2 | db/m | 3409 | 0.004436 | FALSE | 0.604661 | FALSE | Neuron                 |

|                |      |      |          |       |          |       |                        |
|----------------|------|------|----------|-------|----------|-------|------------------------|
| CTCAATTG db/m2 | db/m | 5022 | 0.027273 | FALSE | 0.865398 | FALSE | Photoreceptor          |
| CTCAATTG db/m2 | db/m | 5618 | 0.027273 | FALSE | 1.185995 | FALSE | Photoreceptor          |
| CTCAATTG db/m2 | db/m | 3347 | 0.014429 | FALSE | 0.91605  | FALSE | Photoreceptor          |
| CTCACTGG db/m2 | db/m | 443  | 0.031411 | FALSE | 47.54816 | TRUE  |                        |
| CTCACTGT db/m2 | db/m | 1287 | 0.061912 | FALSE | 2.723787 | FALSE | Photoreceptor          |
| CTCAGAAC db/m2 | db/m | 4020 | 0.007833 | FALSE | 1.329146 | FALSE | Photoreceptor          |
| CTCAGAAC db/m2 | db/m | 1351 | 0.071958 | FALSE | 1.711453 | FALSE | Endothelia Capillary E |
| CTCAGGG db/m2  | db/m | 8477 | 0.053718 | FALSE | 0.896989 | FALSE | Photoreceptor          |
| CTCAGTCA db/m2 | db/m | 708  | 0.028251 | FALSE | 1.337368 | FALSE | Photoreceptor          |
| CTCAGTCC db/m2 | db/m | 9590 | 0.031973 | FALSE | 0.707791 | FALSE | Photoreceptor          |
| CTCAGTCC db/m2 | db/m | 6273 | 0.021669 | FALSE | 0.822688 | FALSE | Endothelia Venous EC   |
| CTCATCGA db/m2 | db/m | 575  | 0.088776 | FALSE | 9.070295 | TRUE  |                        |
| CTCATCGC db/m2 | db/m | 406  | 0.011561 | FALSE | 2.017754 | FALSE | Endothelia Capillary E |
| CTCATGCC db/m2 | db/m | 543  | 0.03313  | FALSE | 2.479981 | FALSE | Muller cell            |
| CTCATGCT db/m2 | db/m | 1355 | 0.046906 | FALSE | 1.822381 | FALSE | Photoreceptor          |
| CTCATTAC db/m2 | db/m | 626  | 0.012303 | FALSE | 50.30137 | TRUE  |                        |
| CTCCAACA db/m2 | db/m | 424  | 0.035586 | FALSE | 3.606774 | FALSE | Endothelia Capillary E |
| CTCCAACC db/m2 | db/m | 1067 | 0.065957 | FALSE | 4.630624 | FALSE | Muller cell            |
| CTCCAACG db/m2 | db/m | 2161 | 0.015287 | FALSE | 0.975188 | FALSE | Photoreceptor          |
| CTCCACAA db/m2 | db/m | 7695 | 0.018088 | FALSE | 0.853575 | FALSE | Photoreceptor          |
| CTCCACAC db/m2 | db/m | 7677 | 0.016799 | FALSE | 0.925769 | FALSE | Photoreceptor          |
| CTCCACAT db/m2 | db/m | 5004 | 0.043505 | FALSE | 1.198171 | FALSE | Photoreceptor          |
| CTCCACAT db/m2 | db/m | 1730 | 0.026328 | FALSE | 1.98242  | FALSE | Endothelia Venous EC   |
| CTCCACAT db/m2 | db/m | 316  | 0.014711 | FALSE | 53.6385  | TRUE  |                        |
| CTCCACAT db/m2 | db/m | 7906 | 0.095727 | FALSE | 5.535627 | TRUE  |                        |
| CTCCATGC db/m2 | db/m | 7655 | 0.018422 | FALSE | 0.64744  | FALSE | Photoreceptor          |
| CTCCATGG db/m2 | db/m | 3859 | 0.022455 | FALSE | 0.947084 | FALSE | Photoreceptor          |
| CTCCATGT db/m2 | db/m | 399  | 0.025868 | FALSE | 3.54055  | FALSE | Muller cell            |
| CTCCCAAC db/m2 | db/m | 2795 | 0.040404 | FALSE | 1.694216 | FALSE | Endothelia Capillary E |
| CTCCCTCG db/m2 | db/m | 3431 | 0.011319 | FALSE | 1.248895 | FALSE | Endothelia Capillary E |
| CTCCCTCG db/m2 | db/m | 360  | 0.038953 | FALSE | 2.389409 | FALSE | Photoreceptor          |
| CTCCCTCT db/m2 | db/m | 1099 | 0.014997 | FALSE | 0.341633 | FALSE | Photoreceptor          |
| CTCCGATA db/m2 | db/m | 1834 | 0.024971 | FALSE | 1.610954 | FALSE | Endothelia Capillary E |
| CTCCTCCA db/m2 | db/m | 778  | 0.013876 | FALSE | 2.07632  | FALSE | Muller cell            |
| CTCCTCCC db/m2 | db/m | 6992 | 0.013074 | FALSE | 0.970487 | FALSE | Photoreceptor          |
| CTCCTCCG db/m2 | db/m | 1155 | 0.011081 | FALSE | 2.284056 | FALSE | Endothelia Capillary E |
| CTCCTCCT db/m2 | db/m | 2018 | 0.007058 | FALSE | 1.143491 | FALSE | Endothelia Capillary E |
| CTCCTTTA db/m2 | db/m | 3372 | 0.052669 | FALSE | 1.447361 | FALSE | Photoreceptor          |
| CTCCTTTC db/m2 | db/m | 1479 | 0.022857 | FALSE | 1.571461 | FALSE | Photoreceptor          |
| CTCGAGG db/m2  | db/m | 797  | 0.034954 | FALSE | 2.887141 | FALSE | Muller cell            |
| CTCGAGG db/m2  | db/m | 705  | 0.064568 | FALSE | 1.3575   | FALSE | Muller cell            |
| CTCGAGG db/m2  | db/m | 385  | 0.036891 | FALSE | 3.521235 | FALSE | Photoreceptor          |
| CTCGAGG db/m2  | db/m | 8318 | 0.026796 | FALSE | 0.885471 | FALSE | Photoreceptor          |
| CTCGAGG db/m2  | db/m | 5243 | 0.016488 | FALSE | 1.021549 | FALSE | Photoreceptor          |
| CTCGAGG db/m2  | db/m | 1866 | 0.023682 | FALSE | 1.612673 | FALSE | Endothelia Capillary E |
| CTCTCAGA db/m2 | db/m | 2834 | 0.018422 | FALSE | 1.138879 | FALSE | Endothelia Capillary E |
| CTCTCAGC db/m2 | db/m | 7465 | 0.130374 | TRUE  | 6.363063 | TRUE  |                        |

|                |      |       |          |       |          |       |                        |
|----------------|------|-------|----------|-------|----------|-------|------------------------|
| CTCTCGAA db/m2 | db/m | 2004  | 0.080645 | FALSE | 10.4902  | TRUE  |                        |
| CTCTCGAC db/m2 | db/m | 2321  | 0.020171 | FALSE | 1.170924 | FALSE | Photoreceptor          |
| CTCTCGAG db/m2 | db/m | 842   | 0.013074 | FALSE | 37.57143 | TRUE  |                        |
| CTCTCGAG db/m2 | db/m | 392   | 0.029266 | FALSE | 3.91275  | FALSE | Muller cell            |
| CTCTCGAT db/m2 | db/m | 555   | 0.031411 | FALSE | 33.03492 | TRUE  |                        |
| CTCTGGTT db/m2 | db/m | 2378  | 0.017114 | FALSE | 1.437616 | FALSE | Endothelia Capillary E |
| CTCTGGTT db/m2 | db/m | 4249  | 0.021286 | FALSE | 1.124792 | FALSE | Endothelia Capillary E |
| CTGAATGC db/m2 | db/m | 6743  | 0.020908 | FALSE | 1.209645 | FALSE | Endothelia Venous EC   |
| CTGAATGC db/m2 | db/m | 639   | 0.046906 | FALSE | 3.8008   | FALSE | Muller cell            |
| CTGAATGT db/m2 | db/m | 3269  | 0.042704 | FALSE | 5.948553 | TRUE  |                        |
| CTGAATGT db/m2 | db/m | 9337  | 0.045165 | FALSE | 0.656927 | FALSE | Photoreceptor          |
| CTGAGCG/ db/m2 | db/m | 5541  | 0.042704 | FALSE | 0.786929 | FALSE | Photoreceptor          |
| CTGAGCG/ db/m2 | db/m | 1913  | 0.01981  | FALSE | 1.830789 | FALSE | Endothelia Capillary E |
| CTGAGCG/ db/m2 | db/m | 390   | 0.052669 | FALSE | 4.368979 | FALSE | Muller cell            |
| CTGAGCG( db/m2 | db/m | 1928  | 0.022455 | FALSE | 1.46395  | FALSE | Endothelia Aterial EC  |
| CTGAGGC( db/m2 | db/m | 5730  | 0.070386 | FALSE | 1.296251 | FALSE | Endothelia Venous EC   |
| CTGATCCA db/m2 | db/m | 277   | 0.045165 | FALSE | 2.639679 | FALSE | Muller cell            |
| CTGATCCA db/m2 | db/m | 912   | 0.008852 | FALSE | 0.230217 | FALSE | Photoreceptor          |
| CTGATCCT db/m2 | db/m | 3925  | 0.004762 | FALSE | 1.471377 | FALSE | Neuron                 |
| CTGCAGG/ db/m2 | db/m | 2012  | 0.009712 | FALSE | 1.420022 | FALSE | Pericyte               |
| CTGCAGG( db/m2 | db/m | 794   | 0.008234 | FALSE | 1.734614 | FALSE | Muller cell            |
| CTGCAGG  db/m2 | db/m | 415   | 0.015581 | FALSE | 41.34312 | TRUE  |                        |
| CTGCATCA db/m2 | db/m | 1924  | 0.018088 | FALSE | 2.197195 | FALSE | Endothelia Aterial EC  |
| CTGCATCA db/m2 | db/m | 409   | 0.012303 | FALSE | 50.19194 | TRUE  |                        |
| CTGCATCC db/m2 | db/m | 3638  | 0.015581 | FALSE | 1.114838 | FALSE | Endothelia Venous EC   |
| CTGCATCC db/m2 | db/m | 3322  | 0.029787 | FALSE | 1.079234 | FALSE | Neuron                 |
| CTGCATCC db/m2 | db/m | 1868  | 0.082569 | FALSE | 1.693284 | FALSE | Photoreceptor          |
| CTGCATCC db/m2 | db/m | 2868  | 0.054795 | FALSE | 1.160643 | FALSE | Photoreceptor          |
| CTGCATCT db/m2 | db/m | 484   | 0.022857 | FALSE | 0.583242 | FALSE | Photoreceptor          |
| CTGCCATA db/m2 | db/m | 5615  | 0.026796 | FALSE | 1.053658 | FALSE | Photoreceptor          |
| CTGCCATC db/m2 | db/m | 479   | 0.012303 | FALSE | 43.48936 | TRUE  |                        |
| CTGCCATT db/m2 | db/m | 665   | 0.064568 | FALSE | 25.64103 | TRUE  |                        |
| CTGCCTAC db/m2 | db/m | 2017  | 0.027758 | FALSE | 1.598325 | FALSE | Photoreceptor          |
| CTGCCTAG db/m2 | db/m | 3590  | 0.003196 | FALSE | 0.81965  | FALSE | Neuron                 |
| CTGCGAG( db/m2 | db/m | 4978  | 0.017434 | FALSE | 0.959472 | FALSE | Photoreceptor          |
| CTGCGAG( db/m2 | db/m | 10464 | 0.019455 | FALSE | 0.390518 | FALSE | Photoreceptor          |
| CTGCGAG( db/m2 | db/m | 4096  | 0.013876 | FALSE | 0.989747 | FALSE | Photoreceptor          |
| CTGCTCAC db/m2 | db/m | 574   | 0.013338 | FALSE | 2.981479 | FALSE | Muller cell            |
| CTGGACG/ db/m2 | db/m | 2017  | 0.084562 | FALSE | 2.297915 | FALSE | Muller cell            |
| CTGGACG( db/m2 | db/m | 1249  | 0.091004 | FALSE | 3.263363 | FALSE | Muller cell            |
| CTGGACG( db/m2 | db/m | 833   | 0.023266 | FALSE | 4.399185 | FALSE | Muller cell            |
| CTGGACG( db/m2 | db/m | 417   | 0.051646 | FALSE | 3.189765 | FALSE | Microglia              |
| CTGGCAG/ db/m2 | db/m | 1156  | 0.009063 | FALSE | 2.041023 | FALSE | Endothelia Capillary E |
| CTGGCAG( db/m2 | db/m | 2532  | 0.021669 | FALSE | 1.369082 | FALSE | Endothelia Capillary E |
| CTGGCAG( db/m2 | db/m | 478   | 0.033726 | FALSE | 1.941311 | FALSE | Muller cell            |
| CTGGCAG( db/m2 | db/m | 569   | 0.012557 | FALSE | 58.42059 | TRUE  |                        |
| CTGGCAG  db/m2 | db/m | 7605  | 0.027758 | FALSE | 0.843217 | FALSE | Photoreceptor          |

|                |      |       |          |       |          |       |                        |
|----------------|------|-------|----------|-------|----------|-------|------------------------|
| CTGGCAGT db/m2 | db/m | 452   | 0.031973 | FALSE | 14.50858 | TRUE  |                        |
| CTGGCAGT db/m2 | db/m | 845   | 0.051646 | FALSE | 2.868489 | FALSE | Endothelia Capillary E |
| CTGGTCTC db/m2 | db/m | 2868  | 0.078788 | FALSE | 1.589722 | FALSE | Photoreceptor          |
| CTGGTCTC db/m2 | db/m | 1382  | 0.021286 | FALSE | 1.060906 | FALSE | Photoreceptor          |
| CTGTACCC db/m2 | db/m | 8283  | 0.018422 | FALSE | 0.865708 | FALSE | Photoreceptor          |
| CTGTACCC db/m2 | db/m | 7501  | 0.016181 | FALSE | 0.796945 | FALSE | Photoreceptor          |
| CTGTACCC db/m2 | db/m | 482   | 0.061912 | FALSE | 3.882079 | FALSE | Muller cell            |
| CTGTACCC db/m2 | db/m | 3844  | 0.011805 | FALSE | 1.240794 | FALSE | Photoreceptor          |
| CTGTACCC db/m2 | db/m | 4070  | 0.011805 | FALSE | 1.156839 | FALSE | Photoreceptor          |
| CTGTACCT db/m2 | db/m | 4002  | 0.018761 | FALSE | 2.006356 | FALSE | Neuron                 |
| CTGTAGA db/m2  | db/m | 1731  | 0.046025 | FALSE | 1.333571 | FALSE | Photoreceptor          |
| CTGTAGA db/m2  | db/m | 565   | 0.014997 | FALSE | 1.769477 | FALSE | Photoreceptor          |
| CTGTAGAT db/m2 | db/m | 737   | 0.025868 | FALSE | 0.613706 | FALSE | Photoreceptor          |
| CTGTATTA db/m2 | db/m | 448   | 0.122691 | TRUE  | 8.490566 | TRUE  |                        |
| CTGTATTA db/m2 | db/m | 10242 | 0.019106 | FALSE | 0.551118 | FALSE | Photoreceptor          |
| CTGTATTG db/m2 | db/m | 3532  | 0.014429 | FALSE | 1.242453 | FALSE | Photoreceptor          |
| CTGTCGTC db/m2 | db/m | 5259  | 0.045165 | FALSE | 1.539113 | FALSE | Photoreceptor          |
| CTGTGAAC db/m2 | db/m | 6306  | 0.012557 | FALSE | 1.289042 | FALSE | Photoreceptor          |
| CTGTGAAC db/m2 | db/m | 450   | 0.053718 | FALSE | 2.723652 | FALSE | Photoreceptor          |
| CTGTGAAT db/m2 | db/m | 540   | 0.014429 | FALSE | 2.82176  | FALSE | Muller cell            |
| CTGTGGG db/m2  | db/m | 734   | 0.059406 | FALSE | 15.79414 | TRUE  |                        |
| CTGTGGG db/m2  | db/m | 332   | 0.013074 | FALSE | 27.33945 | TRUE  |                        |
| CTTAGGA db/m2  | db/m | 464   | 0.010157 | FALSE | 0.26321  | FALSE | Photoreceptor          |
| CTTAGGA db/m2  | db/m | 396   | 0.091004 | FALSE | 4.25095  | FALSE | Muller cell            |
| CTTAGGA db/m2  | db/m | 8200  | 0.016181 | FALSE | 0.796237 | FALSE | Photoreceptor          |
| CTTAGGA db/m2  | db/m | 2785  | 0.011081 | FALSE | 1.057336 | FALSE | Endothelia Aterial EC  |
| CTTAGGA db/m2  | db/m | 911   | 0.019106 | FALSE | 1.46336  | FALSE | Photoreceptor          |
| CTTCAATA db/m2 | db/m | 427   | 0.112477 | TRUE  | 18.99872 | TRUE  |                        |
| CTTCAATA db/m2 | db/m | 3432  | 0.046025 | FALSE | 1.260067 | FALSE | Photoreceptor          |
| CTTCAATA db/m2 | db/m | 1573  | 0.035586 | FALSE | 18.10127 | TRUE  |                        |
| CTTCAATT db/m2 | db/m | 8073  | 0.017758 | FALSE | 0.626598 | FALSE | Photoreceptor          |
| CTTCCGAA db/m2 | db/m | 486   | 0.039671 | FALSE | 1.317806 | FALSE | Photoreceptor          |
| CTTCCGAG db/m2 | db/m | 554   | 0.025868 | FALSE | 33.57143 | TRUE  |                        |
| CTTCCTTA db/m2 | db/m | 7690  | 0.033726 | FALSE | 0.735743 | FALSE | Photoreceptor          |
| CTTCCTTG db/m2 | db/m | 4011  | 0.006499 | FALSE | 1.067722 | FALSE | Neuron                 |
| CTTCCTTG db/m2 | db/m | 2263  | 0.037564 | FALSE | 2.147547 | FALSE | Photoreceptor          |
| CTTCGGTA db/m2 | db/m | 1778  | 0.046906 | FALSE | 2.086232 | FALSE | Photoreceptor          |
| CTTCGGTC db/m2 | db/m | 1524  | 0.016488 | FALSE | 1.916404 | FALSE | Muller cell            |
| CTTCGGTC db/m2 | db/m | 448   | 0.018761 | FALSE | 52.40033 | TRUE  |                        |
| CTTCGGTC db/m2 | db/m | 1649  | 0.095727 | FALSE | 1.299246 | FALSE | Photoreceptor          |
| CTTCGGTC db/m2 | db/m | 3091  | 0.03313  | FALSE | 1.1428   | FALSE | Photoreceptor          |
| CTTCTAAA db/m2 | db/m | 617   | 0.020908 | FALSE | 4.698364 | FALSE | Muller cell            |
| CTTCTAAT db/m2 | db/m | 501   | 0.485327 | TRUE  | 6.901409 | TRUE  |                        |
| CTTCTAAT db/m2 | db/m | 3660  | 0.012814 | FALSE | 1.365181 | FALSE | Photoreceptor          |
| CTTCTCTA db/m2 | db/m | 1116  | 0.051646 | FALSE | 4.017026 | FALSE | Neuron                 |
| CTTCTCTC db/m2 | db/m | 479   | 0.027758 | FALSE | 1.69836  | FALSE | Photoreceptor          |
| CTTCTCTC db/m2 | db/m | 744   | 0.063221 | FALSE | 2.074373 | FALSE | Photoreceptor          |

|                |      |      |          |       |          |       |                        |
|----------------|------|------|----------|-------|----------|-------|------------------------|
| CTTGAGAA db/m2 | db/m | 3234 | 0.034954 | FALSE | 0.827834 | FALSE | Photoreceptor          |
| CTTGAGAC db/m2 | db/m | 2150 | 0.028754 | FALSE | 2.302181 | FALSE | Muller cell            |
| CTTGAGAT db/m2 | db/m | 571  | 0.076994 | FALSE | 3.796331 | FALSE | Pericyte               |
| CTTGAGAT db/m2 | db/m | 338  | 0.029266 | FALSE | 46.99248 | TRUE  |                        |
| CTTGAGAT db/m2 | db/m | 773  | 0.029266 | FALSE | 3.930816 | FALSE | Muller cell            |
| CTTTCAA db/m2  | db/m | 446  | 0.031973 | FALSE | 3.96269  | FALSE | Muller cell            |
| CTTTCAAG db/m2 | db/m | 3370 | 0.026796 | FALSE | 1.074241 | FALSE | Endothelia Capillary E |
| CTTTCAAT db/m2 | db/m | 582  | 0.012303 | FALSE | 52.38584 | TRUE  |                        |
| CTTTCAAT db/m2 | db/m | 695  | 0.026328 | FALSE | 3.935411 | FALSE | Muller cell            |
| CTTTCAAT db/m2 | db/m | 1064 | 0.067388 | FALSE | 2.732949 | FALSE | Muller cell            |
| CTTTCGGA db/m2 | db/m | 2680 | 0.028754 | FALSE | 1.180391 | FALSE | Photoreceptor          |
| CTTTCGGC db/m2 | db/m | 2403 | 0.020171 | FALSE | 1.538586 | FALSE | Pericyte               |
| CTTTCGGC db/m2 | db/m | 1295 | 0.088776 | FALSE | 1.371455 | FALSE | Photoreceptor          |
| CTTTCGGC db/m2 | db/m | 4421 | 0.013605 | FALSE | 1.229228 | FALSE | Photoreceptor          |
| GAAACCTA db/m2 | db/m | 8730 | 0.014151 | FALSE | 0.73386  | FALSE | Photoreceptor          |
| GAAACCTC db/m2 | db/m | 959  | 0.037564 | FALSE | 1.018487 | FALSE | Photoreceptor          |
| GAAACCTC db/m2 | db/m | 1015 | 0.022059 | FALSE | 0.955851 | FALSE | Photoreceptor          |
| GAAACCTC db/m2 | db/m | 1843 | 0.296296 | TRUE  | 6.305638 | TRUE  |                        |
| GAAACCTC db/m2 | db/m | 3159 | 0.109795 | TRUE  | 3.216824 | FALSE |                        |
| GAAACCTI db/m2 | db/m | 578  | 0.051646 | FALSE | 3.082135 | FALSE | Endothelia Capillary E |
| GAAATGA db/m2  | db/m | 9042 | 0.031411 | FALSE | 0.786936 | FALSE | Photoreceptor          |
| GAAATGA db/m2  | db/m | 7067 | 0.023266 | FALSE | 0.788975 | FALSE | Photoreceptor          |
| GAACACTA db/m2 | db/m | 8017 | 0.024534 | FALSE | 0.979258 | FALSE | Photoreceptor          |
| GAACACTA db/m2 | db/m | 938  | 0.118221 | TRUE  | 2.794819 | FALSE |                        |
| GAACACTA db/m2 | db/m | 406  | 0.054795 | FALSE | 6.643356 | TRUE  |                        |
| GAACACTC db/m2 | db/m | 9332 | 0.067388 | FALSE | 0.609873 | FALSE | Photoreceptor          |
| GAACGTTA db/m2 | db/m | 3452 | 0.046025 | FALSE | 1.527027 | FALSE | Photoreceptor          |
| GAACGTTA db/m2 | db/m | 702  | 0.021286 | FALSE | 0.608734 | FALSE | Photoreceptor          |
| GAACGTTA db/m2 | db/m | 565  | 0.020171 | FALSE | 43.97294 | TRUE  |                        |
| GAACGTTI db/m2 | db/m | 4884 | 0.009277 | FALSE | 1.29433  | FALSE | Photoreceptor          |
| GAACGTTI db/m2 | db/m | 537  | 0.045165 | FALSE | 41.34299 | TRUE  |                        |
| GAACGTTI db/m2 | db/m | 5207 | 0.13452  | TRUE  | 7.054456 | TRUE  |                        |
| GAAGTGA db/m2  | db/m | 1590 | 0.036891 | FALSE | 1.637343 | FALSE | Photoreceptor          |
| GAAGTGA db/m2  | db/m | 490  | 0.035586 | FALSE | 3.625488 | FALSE | Photoreceptor          |
| GAAGTGT db/m2  | db/m | 1253 | 0.009712 | FALSE | 1.34625  | FALSE | Photoreceptor          |
| GAAGAATC db/m2 | db/m | 3805 | 0.026328 | FALSE | 0.742239 | FALSE | Photoreceptor          |
| GAAGAATC db/m2 | db/m | 373  | 0.045165 | FALSE | 2.822457 | FALSE | Photoreceptor          |
| GAAGAATC db/m2 | db/m | 6119 | 0.018088 | FALSE | 0.70038  | FALSE | Photoreceptor          |
| GAAGAATC db/m2 | db/m | 680  | 0.028251 | FALSE | 35.62622 | TRUE  |                        |
| GAAGCCC db/m2  | db/m | 4727 | 0.021669 | FALSE | 0.993418 | FALSE | Endothelia Venous EC   |
| GAAGGAC db/m2  | db/m | 683  | 0.138889 | TRUE  | 14.5189  | TRUE  |                        |
| GAAGGAC db/m2  | db/m | 3317 | 0.03313  | FALSE | 2.090235 | FALSE | Neuron                 |
| GAAGGAC db/m2  | db/m | 3692 | 0.017758 | FALSE | 1.563539 | FALSE | Neuron                 |
| GAAGGAC db/m2  | db/m | 1852 | 0.049679 | FALSE | 2.261178 | FALSE | Muller cell            |
| GAAGGGT db/m2  | db/m | 819  | 0.029787 | FALSE | 33.06027 | TRUE  |                        |
| GAAGGGT db/m2  | db/m | 1254 | 0.073582 | FALSE | 2.03098  | FALSE | Photoreceptor          |
| GAAGGGT db/m2  | db/m | 837  | 0.045165 | FALSE | 4.848673 | FALSE | Endothelia Capillary E |



|                 |      |      |          |       |          |       |                        |
|-----------------|------|------|----------|-------|----------|-------|------------------------|
| GAAGGGT↓ db/m2  | db/m | 4348 | 0.007441 | FALSE | 1.577635 | FALSE | Photoreceptor          |
| GAAGGGT↓ db/m2  | db/m | 451  | 0.029787 | FALSE | 35.3222  | TRUE  |                        |
| GAAGGGT db/m2   | db/m | 2623 | 0.036232 | FALSE | 1.571912 | FALSE | Neuron                 |
| GAAGTAA↓ db/m2  | db/m | 630  | 0.036232 | FALSE | 1.137826 | FALSE | Microglia              |
| GAAGTAA↓ db/m2  | db/m | 5068 | 0.054795 | FALSE | 0.979754 | FALSE | Endothelia Capillary E |
| GAAGTAA↓ db/m2  | db/m | 384  | 0.024534 | FALSE | 57.19814 | TRUE  |                        |
| GAAGTAA↓ db/m2  | db/m | 492  | 0.016799 | FALSE | 2.430832 | FALSE | Muller cell            |
| GAAGTAA↓ db/m2  | db/m | 582  | 0.020908 | FALSE | 3.054164 | FALSE | Pericyte               |
| GAAGTAA↓ db/m2  | db/m | 5321 | 0.022455 | FALSE | 1.039234 | FALSE | Photoreceptor          |
| GAATAGA↓ db/m2  | db/m | 496  | 0.038953 | FALSE | 2.271215 | FALSE | Photoreceptor          |
| GAATAGA↓ db/m2  | db/m | 5703 | 0.016488 | FALSE | 0.951802 | FALSE | Photoreceptor          |
| GAATAGA↓ db/m2  | db/m | 3142 | 0.008438 | FALSE | 1.265924 | FALSE | Photoreceptor          |
| GAATAGA↓ db/m2  | db/m | 420  | 0.065957 | FALSE | 2.993702 | FALSE | Photoreceptor          |
| GAATAGA↓ db/m2  | db/m | 8478 | 0.027273 | FALSE | 0.726307 | FALSE | Photoreceptor          |
| GAATAGA↓ db/m2  | db/m | 553  | 0.100845 | TRUE  | 13.1579  | TRUE  |                        |
| GAATCAC↓ db/m2  | db/m | 411  | 0.030318 | FALSE | 42.63352 | TRUE  |                        |
| GAATCGT↓ db/m2  | db/m | 2239 | 0.05065  | FALSE | 1.549984 | FALSE | Photoreceptor          |
| GAATCGT↓ db/m2  | db/m | 620  | 0.010157 | FALSE | 1.246708 | FALSE | Photoreceptor          |
| GACACGC↓ db/m2  | db/m | 423  | 0.04192  | FALSE | 2.560794 | FALSE | Muller cell            |
| GACAGCC↓ db/m2  | db/m | 938  | 0.045165 | FALSE | 2.799155 | FALSE | Muller cell            |
| GACAGCC↓ db/m2  | db/m | 9082 | 0.020171 | FALSE | 0.745467 | FALSE | Photoreceptor          |
| GACATCAC↓ db/m2 | db/m | 4842 | 0.024534 | FALSE | 1.529176 | FALSE | Neuron                 |
| GACATCAC↓ db/m2 | db/m | 3332 | 0.026796 | FALSE | 0.645743 | FALSE | Photoreceptor          |
| GACATCAT↓ db/m2 | db/m | 415  | 0.070386 | FALSE | 4.768664 | FALSE | Muller cell            |
| GACATCAT↓ db/m2 | db/m | 442  | 0.029266 | FALSE | 4.333444 | FALSE | Muller cell            |
| GACCAAT↓ db/m2  | db/m | 1519 | 0.029266 | FALSE | 3.621746 | FALSE | Muller cell            |
| GACCAAT↓ db/m2  | db/m | 544  | 0.032546 | FALSE | 4.523806 | FALSE | Muller cell            |
| GACCAAT↓ db/m2  | db/m | 3060 | 0.017758 | FALSE | 1.412268 | FALSE | Endothelia Capillary E |
| GACCAATT↓ db/m2 | db/m | 991  | 0.026328 | FALSE | 1.82492  | FALSE | Endothelia Capillary E |
| GACCCAG↓ db/m2  | db/m | 4572 | 0.026328 | FALSE | 1.130963 | FALSE | Photoreceptor          |
| GACCCAG↓ db/m2  | db/m | 1411 | 0.073582 | FALSE | 1.56366  | FALSE | Photoreceptor          |
| GACCCAG↓ db/m2  | db/m | 3593 | 0.023682 | FALSE | 1.26964  | FALSE | Endothelia Venous EC   |
| GACCCAG↓ db/m2  | db/m | 7066 | 0.045165 | FALSE | 0.960838 | FALSE | Endothelia Venous EC   |
| GACCCTTA↓ db/m2 | db/m | 403  | 0.028251 | FALSE | 3.973831 | FALSE | Muller cell            |
| GACCCTTC↓ db/m2 | db/m | 6850 | 0.018422 | FALSE | 0.980771 | FALSE | Photoreceptor          |
| GACCCTTC↓ db/m2 | db/m | 900  | 0.051646 | FALSE | 2.862906 | FALSE | Muller cell            |
| GACCCTTC↓ db/m2 | db/m | 2988 | 0.064568 | FALSE | 1.564343 | FALSE | Endothelia Capillary E |
| GACCCTTC↓ db/m2 | db/m | 1913 | 0.011805 | FALSE | 1.12563  | FALSE | Endothelia Capillary E |
| GACCCTTT↓ db/m2 | db/m | 2578 | 0.021286 | FALSE | 1.741768 | FALSE | Endothelia Aterial EC  |
| GACCCTTT↓ db/m2 | db/m | 3608 | 0.008852 | FALSE | 1.292579 | FALSE | Endothelia Venous EC   |
| GACCGTG↓ db/m2  | db/m | 1334 | 0.082569 | FALSE | 1.614861 | FALSE | Photoreceptor          |
| GACCGTG↓ db/m2  | db/m | 5124 | 0.003959 | FALSE | 1.336573 | FALSE | Neuron                 |
| GACCGTG↓ db/m2  | db/m | 3638 | 0.130374 | TRUE  | 8.973917 | TRUE  |                        |
| GACCTTCA↓ db/m2 | db/m | 1836 | 0.078788 | FALSE | 2.499713 | FALSE | Muller cell            |
| GACCTTCA↓ db/m2 | db/m | 465  | 0.023266 | FALSE | 44.32432 | TRUE  |                        |
| GACCTTCG↓ db/m2 | db/m | 9677 | 0.024105 | FALSE | 0.715837 | FALSE | Photoreceptor          |
| GACCTTCT↓ db/m2 | db/m | 5651 | 0.018422 | FALSE | 1.112237 | FALSE | Endothelia Venous EC   |

|                |      |      |          |       |          |       |                         |
|----------------|------|------|----------|-------|----------|-------|-------------------------|
| GACCTTCT db/m2 | db/m | 9004 | 0.023266 | FALSE | 1.08143  | FALSE | Photoreceptor           |
| GACCTTCT db/m2 | db/m | 1527 | 0.027273 | FALSE | 2.146286 | FALSE | Photoreceptor           |
| GACGCTG db/m2  | db/m | 541  | 0.012303 | FALSE | 1.890526 | FALSE | Muller cell             |
| GACGCTG db/m2  | db/m | 814  | 0.025416 | FALSE | 0.369252 | FALSE | Photoreceptor           |
| GACGCTG db/m2  | db/m | 269  | 0.019106 | FALSE | 66.08884 | TRUE  |                         |
| GACGTTA db/m2  | db/m | 1493 | 0.082569 | FALSE | 2.613629 | FALSE | Neuron                  |
| GACGTTA db/m2  | db/m | 4896 | 0.014429 | FALSE | 1.10614  | FALSE | Endothelia Venous EC    |
| GACGTTA db/m2  | db/m | 379  | 0.055901 | FALSE | 3.623776 | FALSE | Photoreceptor           |
| GACGTTA db/m2  | db/m | 739  | 0.031411 | FALSE | 36.63793 | TRUE  |                         |
| GACGTTA db/m2  | db/m | 1340 | 0.098234 | FALSE | 3.241795 | FALSE | Muller cell             |
| GACGTTA db/m2  | db/m | 454  | 0.029266 | FALSE | 42.79869 | TRUE  |                         |
| GACGTTA db/m2  | db/m | 1102 | 0.03313  | FALSE | 1.850937 | FALSE | Photoreceptor           |
| GACGTTA db/m2  | db/m | 1760 | 0.019455 | FALSE | 1.028502 | FALSE | Photoreceptor           |
| GACGTTA db/m2  | db/m | 2132 | 0.034954 | FALSE | 1.257322 | FALSE | Photoreceptor           |
| GACTATG db/m2  | db/m | 2217 | 0.082569 | FALSE | 2.409762 | FALSE | Photoreceptor           |
| GACTATG db/m2  | db/m | 2872 | 0.013338 | FALSE | 1.247112 | FALSE | Photoreceptor           |
| GACTATG db/m2  | db/m | 1423 | 0.017434 | FALSE | 1.855974 | FALSE | Neuron                  |
| GACTCAA db/m2  | db/m | 6363 | 0.023682 | FALSE | 1.231594 | FALSE | Photoreceptor           |
| GACTCAA db/m2  | db/m | 4945 | 0.031411 | FALSE | 1.420562 | FALSE | Photoreceptor           |
| GACTCAA db/m2  | db/m | 6325 | 0.036232 | FALSE | 1.070383 | FALSE | Photoreceptor           |
| GACTGAT db/m2  | db/m | 803  | 0.049679 | FALSE | 4.205836 | FALSE | Muller cell             |
| GACTGAT db/m2  | db/m | 538  | 0.020171 | FALSE | 2.162193 | FALSE | Pericyte                |
| GACTGAT db/m2  | db/m | 1268 | 0.017114 | FALSE | 1.847882 | FALSE | Endothelia Capillary EC |
| GACTGAT db/m2  | db/m | 644  | 0.052669 | FALSE | 3.302235 | FALSE | Muller cell             |
| GACTTCCT db/m2 | db/m | 4434 | 0.014429 | FALSE | 1.071487 | FALSE | Endothelia Venous EC    |
| GAGAAAT db/m2  | db/m | 354  | 0.011319 | FALSE | 4.507072 | FALSE | Muller cell             |
| GAGAAAT db/m2  | db/m | 398  | 0.024105 | FALSE | 2.726246 | FALSE | Muller cell             |
| GAGAAAT db/m2  | db/m | 390  | 0.067388 | FALSE | 1.624791 | FALSE | Photoreceptor           |
| GAGACCC db/m2  | db/m | 830  | 0.027273 | FALSE | 0.841727 | FALSE | Photoreceptor           |
| GAGACCC db/m2  | db/m | 409  | 0.019455 | FALSE | 0.684783 | FALSE | Photoreceptor           |
| GAGACCC db/m2  | db/m | 565  | 0.020536 | FALSE | 3.614776 | FALSE | Photoreceptor           |
| GAGACTTA db/m2 | db/m | 1545 | 0.013074 | FALSE | 0.437588 | FALSE | Photoreceptor           |
| GAGACTTA db/m2 | db/m | 6134 | 0.135645 | TRUE  | 2.632313 | FALSE |                         |
| GAGACTTA db/m2 | db/m | 4405 | 0.022455 | FALSE | 1.306468 | FALSE | Endothelia Venous EC    |
| GAGAGGT db/m2  | db/m | 800  | 0.015287 | FALSE | 2.049626 | FALSE | Muller cell             |
| GAGAGGT db/m2  | db/m | 1183 | 0.046906 | FALSE | 2.095541 | FALSE | Photoreceptor           |
| GAGATGG db/m2  | db/m | 917  | 0.008032 | FALSE | 0.232223 | FALSE | Photoreceptor           |
| GAGATGG db/m2  | db/m | 1490 | 0.068864 | FALSE | 17.32118 | TRUE  |                         |
| GAGCCTG db/m2  | db/m | 459  | 0.067388 | FALSE | 3.647078 | FALSE | Muller cell             |
| GAGCTGC db/m2  | db/m | 1502 | 0.041154 | FALSE | 1.678154 | FALSE | Endothelia Capillary EC |
| GAGCTGC db/m2  | db/m | 654  | 0.014429 | FALSE | 0.416175 | FALSE | Endothelia Capillary EC |
| GAGCTGC db/m2  | db/m | 3283 | 0.051646 | FALSE | 1.452075 | FALSE | Photoreceptor           |
| GAGCTGC db/m2  | db/m | 2582 | 0.048732 | FALSE | 2.868769 | FALSE | Muller cell             |
| GAGCTGC db/m2  | db/m | 9883 | 0.016181 | FALSE | 0.66507  | FALSE | Photoreceptor           |
| GAGCTGC db/m2  | db/m | 2230 | 0.024105 | FALSE | 1.52704  | FALSE | Endothelia Capillary EC |
| GAGGCAA db/m2  | db/m | 1699 | 0.088776 | FALSE | 1.878903 | FALSE | Endothelia Capillary EC |
| GAGGCAA db/m2  | db/m | 502  | 0.009933 | FALSE | 1.064003 | FALSE | Photoreceptor           |

|                |      |      |          |       |          |       |                        |
|----------------|------|------|----------|-------|----------|-------|------------------------|
| GAGGCAA db/m2  | db/m | 1289 | 0.036232 | FALSE | 0.933592 | FALSE | Photoreceptor          |
| GAGGCAA db/m2  | db/m | 421  | 0.053718 | FALSE | 8.985024 | TRUE  |                        |
| GAGGCCT db/m2  | db/m | 1397 | 0.098234 | FALSE | 2.689118 | FALSE | Endothelia Capillary E |
| GAGGCCT db/m2  | db/m | 978  | 0.054795 | FALSE | 3.157557 | FALSE | Endothelia Capillary E |
| GAGGGAT db/m2  | db/m | 5638 | 0.039671 | FALSE | 1.442819 | FALSE | Photoreceptor          |
| GAGGGAT db/m2  | db/m | 3867 | 0.014151 | FALSE | 1.317923 | FALSE | Endothelia Aterial EC  |
| GAGGGAT db/m2  | db/m | 347  | 0.023266 | FALSE | 20.26515 | TRUE  |                        |
| GAGGGAT db/m2  | db/m | 3414 | 0.003649 | FALSE | 0.969776 | FALSE | Neuron                 |
| GAGGGAT db/m2  | db/m | 510  | 0.028754 | FALSE | 48.125   | TRUE  |                        |
| GAGGGTA db/m2  | db/m | 1233 | 0.024534 | FALSE | 0.949179 | FALSE | Photoreceptor          |
| GAGGGTA db/m2  | db/m | 1579 | 0.071958 | FALSE | 1.310917 | FALSE | Photoreceptor          |
| GAGGGTA db/m2  | db/m | 3634 | 0.15354  | TRUE  | 6.697287 | TRUE  |                        |
| GAGTCAT db/m2  | db/m | 4774 | 0.052669 | FALSE | 1.299605 | FALSE | Endothelia Capillary E |
| GAGTCAT db/m2  | db/m | 1148 | 0.032546 | FALSE | 1.751717 | FALSE | Photoreceptor          |
| GAGTCTA db/m2  | db/m | 6830 | 0.027758 | FALSE | 1.007666 | FALSE | Photoreceptor          |
| GAGTCTA db/m2  | db/m | 1674 | 0.115641 | TRUE  | 2.131439 | FALSE |                        |
| GAGTGAG db/m2  | db/m | 2574 | 0.030318 | FALSE | 1.017381 | FALSE | Photoreceptor          |
| GAGTGAG db/m2  | db/m | 1037 | 0.064568 | FALSE | 3.76036  | FALSE | Muller cell            |
| GAGTGAG db/m2  | db/m | 879  | 0.014997 | FALSE | 3.9262   | FALSE | Photoreceptor          |
| GAGTGTT db/m2  | db/m | 5787 | 0.014151 | FALSE | 0.994373 | FALSE | Photoreceptor          |
| GAGTGTT db/m2  | db/m | 1126 | 0.006499 | FALSE | 2.081573 | FALSE | Endothelia Capillary E |
| GAGTGTT db/m2  | db/m | 815  | 0.022857 | FALSE | 2.94194  | FALSE | Endothelia Capillary E |
| GAGTGTT db/m2  | db/m | 3242 | 0.055901 | FALSE | 1.326692 | FALSE | Photoreceptor          |
| GAGTGTT db/m2  | db/m | 3508 | 0.022059 | FALSE | 1.191052 | FALSE | Endothelia Venous EC   |
| GAGTTAC db/m2  | db/m | 405  | 0.027758 | FALSE | 3.719201 | FALSE | Endothelia Capillary E |
| GAGTTAC db/m2  | db/m | 1741 | 0.126437 | TRUE  | 3.89182  | FALSE |                        |
| GAGTTAC db/m2  | db/m | 306  | 0.048732 | FALSE | 30.09524 | TRUE  |                        |
| GAGTTAC db/m2  | db/m | 4426 | 0.017434 | FALSE | 1.301343 | FALSE | Endothelia Venous EC   |
| GAGTTGT db/m2  | db/m | 1871 | 0.080645 | FALSE | 14.07465 | TRUE  |                        |
| GAGTTGT db/m2  | db/m | 4070 | 0.021669 | FALSE | 1.493982 | FALSE | Photoreceptor          |
| GATAGAA db/m2  | db/m | 654  | 0.055901 | FALSE | 12.63941 | TRUE  |                        |
| GATAGAA db/m2  | db/m | 4209 | 0.009277 | FALSE | 1.46793  | FALSE | Neuron                 |
| GATAGCT db/m2  | db/m | 997  | 0.024534 | FALSE | 4.158661 | FALSE | Muller cell            |
| GATAGCT db/m2  | db/m | 641  | 0.029266 | FALSE | 3.75735  | FALSE | Muller cell            |
| GATCACAC db/m2 | db/m | 202  | 0.014711 | FALSE | 72.84235 | TRUE  |                        |
| GATCAGT db/m2  | db/m | 2529 | 0.016799 | FALSE | 1.683495 | FALSE | Photoreceptor          |
| GATCAGT db/m2  | db/m | 224  | 0.012052 | FALSE | 69.47743 | TRUE  |                        |
| GATCAGT db/m2  | db/m | 614  | 0.013876 | FALSE | 1.985059 | FALSE | Endothelia Capillary E |
| GATCATG db/m2  | db/m | 4382 | 0.016181 | FALSE | 0.979294 | FALSE | Photoreceptor          |
| GATCATG db/m2  | db/m | 3024 | 0.054795 | FALSE | 1.614835 | FALSE | Photoreceptor          |
| GATCATG db/m2  | db/m | 834  | 0.016181 | FALSE | 2.717605 | FALSE | Muller cell            |
| GATCATG db/m2  | db/m | 1885 | 0.060641 | FALSE | 2.091233 | FALSE | Muller cell            |
| GATCCCTA db/m2 | db/m | 2823 | 0.027273 | FALSE | 1.180265 | FALSE | Neuron                 |
| GATCCCTC db/m2 | db/m | 1492 | 0.006499 | FALSE | 1.249866 | FALSE | Endothelia Capillary E |
| GATCCCTC db/m2 | db/m | 586  | 0.013338 | FALSE | 3.279604 | FALSE | Muller cell            |
| GATCCCTC db/m2 | db/m | 508  | 0.018088 | FALSE | 35.92142 | TRUE  |                        |
| GATCCCTC db/m2 | db/m | 3724 | 0.026796 | FALSE | 0.804535 | FALSE | Photoreceptor          |

|                |      |      |          |       |          |       |                        |
|----------------|------|------|----------|-------|----------|-------|------------------------|
| GATCCCTT db/m2 | db/m | 656  | 0.014151 | FALSE | 3.804787 | FALSE | Muller cell            |
| GATCGTAC db/m2 | db/m | 7994 | 0.014997 | FALSE | 0.828401 | FALSE | Photoreceptor          |
| GATCGTAC db/m2 | db/m | 5098 | 0.13452  | TRUE  | 11.4561  | TRUE  |                        |
| GATGACT/ db/m2 | db/m | 414  | 0.036232 | FALSE | 43.56984 | TRUE  |                        |
| GATGACT/ db/m2 | db/m | 6240 | 0.018088 | FALSE | 0.995796 | FALSE | Photoreceptor          |
| GATGACTC db/m2 | db/m | 357  | 0.009493 | FALSE | 60.68516 | TRUE  |                        |
| GATGACTC db/m2 | db/m | 1356 | 0.020908 | FALSE | 0.86161  | FALSE | Photoreceptor          |
| GATGACTC db/m2 | db/m | 648  | 0.08663  | FALSE | 3.994071 | FALSE | Muller cell            |
| GATGACTC db/m2 | db/m | 3074 | 0.009063 | FALSE | 1.740947 | FALSE | Neuron                 |
| GATGAGG db/m2  | db/m | 650  | 0.093319 | FALSE | 4.818916 | FALSE | Muller cell            |
| GATGAGG db/m2  | db/m | 512  | 0.073582 | FALSE | 3.131209 | FALSE | Photoreceptor          |
| GATGAGG db/m2  | db/m | 2238 | 0.036232 | FALSE | 0.975461 | FALSE | Photoreceptor          |
| GATGATC/ db/m2 | db/m | 4021 | 0.036232 | FALSE | 1.20212  | FALSE | Endothelia Aterial EC  |
| GATGATCC db/m2 | db/m | 5260 | 0.055901 | FALSE | 1.260433 | FALSE | Endothelia Venous EC   |
| GATGCTA/ db/m2 | db/m | 503  | 0.013876 | FALSE | 1.071533 | FALSE | Photoreceptor          |
| GATGCTAC db/m2 | db/m | 663  | 0.084562 | FALSE | 3.953108 | FALSE | Muller cell            |
| GATGCTAC db/m2 | db/m | 203  | 0.109795 | TRUE  | 0.338855 | FALSE |                        |
| GATGCTAC db/m2 | db/m | 805  | 0.106408 | TRUE  | 29.2328  | TRUE  |                        |
| GATGCTAT db/m2 | db/m | 261  | 0.045165 | FALSE | 35.84906 | TRUE  |                        |
| GATGGAG db/m2  | db/m | 3577 | 0.004436 | FALSE | 1.207287 | FALSE | Neuron                 |
| GATGGAG db/m2  | db/m | 578  | 0.164835 | TRUE  | 5.121951 | TRUE  |                        |
| GATGGAG db/m2  | db/m | 480  | 0.036232 | FALSE | 28.97298 | TRUE  |                        |
| GATGGAG db/m2  | db/m | 2722 | 0.044326 | FALSE | 1.333884 | FALSE | Endothelia Capillary E |
| GATGGAG db/m2  | db/m | 895  | 0.013338 | FALSE | 0.426744 | FALSE | Photoreceptor          |
| GATGGAG db/m2  | db/m | 3389 | 0.024971 | FALSE | 1.813337 | FALSE | Photoreceptor          |
| GATGGAG db/m2  | db/m | 382  | 0.009712 | FALSE | 3.806143 | FALSE | Muller cell            |
| GATGTTG/ db/m2 | db/m | 4632 | 0.159016 | TRUE  | 9.262785 | TRUE  |                        |
| GATGTTG/ db/m2 | db/m | 763  | 0.015879 | FALSE | 3.250135 | FALSE | Endothelia Capillary E |
| GATGTTGC db/m2 | db/m | 1028 | 0.029787 | FALSE | 0.856788 | FALSE | Photoreceptor          |
| GATGTTG db/m2  | db/m | 537  | 0.209157 | TRUE  | 35.77982 | TRUE  |                        |
| GATTCTTA db/m2 | db/m | 455  | 0.024971 | FALSE | 0.99127  | FALSE | Photoreceptor          |
| GATTCTTG db/m2 | db/m | 669  | 0.071958 | FALSE | 13.64452 | TRUE  |                        |
| GATTCTTG db/m2 | db/m | 1119 | 0.014711 | FALSE | 1.899732 | FALSE | Endothelia Capillary E |
| GATTCTTT db/m2 | db/m | 2059 | 0.052669 | FALSE | 1.598639 | FALSE | Photoreceptor          |
| GATTGGT/ db/m2 | db/m | 501  | 0.012303 | FALSE | 56.06648 | TRUE  |                        |
| GATTGGTC db/m2 | db/m | 680  | 0.040404 | FALSE | 0.933204 | FALSE | Photoreceptor          |
| GATTGGTC db/m2 | db/m | 1277 | 0.031973 | FALSE | 0.771311 | FALSE | Photoreceptor          |
| GATTGGTT db/m2 | db/m | 7371 | 0.054795 | FALSE | 1.350257 | FALSE | Neuron                 |
| GATTGGTT db/m2 | db/m | 210  | 0.031973 | FALSE | 69.41625 | TRUE  |                        |
| GATTTCTT db/m2 | db/m | 382  | 0.08663  | FALSE | 2.470644 | FALSE | Photoreceptor          |
| GCAACATC db/m2 | db/m | 2050 | 0.026796 | FALSE | 1.745739 | FALSE | Photoreceptor          |
| GCAACATC db/m2 | db/m | 747  | 0.031973 | FALSE | 0.437828 | FALSE | Photoreceptor          |
| GCAACATC db/m2 | db/m | 9924 | 0.017434 | FALSE | 0.675146 | FALSE | Photoreceptor          |
| GCAACATC db/m2 | db/m | 457  | 0.106408 | TRUE  | 17.3456  | TRUE  |                        |
| GCAACCG/ db/m2 | db/m | 156  | 0.011805 | FALSE | 78.39081 | TRUE  |                        |
| GCAACCG/ db/m2 | db/m | 2422 | 0.026796 | FALSE | 1.23296  | FALSE | Endothelia Capillary E |
| GCAACCGC db/m2 | db/m | 400  | 0.060641 | FALSE | 4.234921 | FALSE | Endothelia Capillary E |

|               |      |      |          |       |          |       |                        |
|---------------|------|------|----------|-------|----------|-------|------------------------|
| GCAACCG(db/m2 | db/m | 463  | 0.019106 | FALSE | 30.81329 | TRUE  |                        |
| GCAACCG(db/m2 | db/m | 5470 | 0.008032 | FALSE | 1.240042 | FALSE | Photoreceptor          |
| GCAACCG(db/m2 | db/m | 1167 | 0.078788 | FALSE | 3.324335 | FALSE | Muller cell            |
| GCAACCG(db/m2 | db/m | 2590 | 0.068864 | FALSE | 3.423163 | FALSE | Muller cell            |
| GCAACCGdb/m2  | db/m | 1457 | 0.024971 | FALSE | 2.577185 | FALSE | Endothelia Capillary E |
| GCACATA/db/m2 | db/m | 1298 | 0.01981  | FALSE | 0.641719 | FALSE | Photoreceptor          |
| GCACATA(db/m2 | db/m | 1293 | 0.022857 | FALSE | 0.458952 | FALSE | Photoreceptor          |
| GCACATA(db/m2 | db/m | 8823 | 0.016181 | FALSE | 0.729418 | FALSE | Photoreceptor          |
| GCACATA(db/m2 | db/m | 1962 | 0.048732 | FALSE | 1.451404 | FALSE | Photoreceptor          |
| GCACGGT(db/m2 | db/m | 2468 | 0.038251 | FALSE | 1.726632 | FALSE | Photoreceptor          |
| GCACGGTdb/m2  | db/m | 443  | 0.012303 | FALSE | 0.842585 | FALSE | Photoreceptor          |
| GCACGTG(db/m2 | db/m | 494  | 0.060641 | FALSE | 24.92339 | TRUE  |                        |
| GCACGTG(db/m2 | db/m | 534  | 0.065957 | FALSE | 23.80953 | TRUE  |                        |
| GCACGTG(db/m2 | db/m | 2781 | 0.024105 | FALSE | 1.253612 | FALSE | Endothelia Capillary E |
| GCACGTG(db/m2 | db/m | 581  | 0.061912 | FALSE | 4.33979  | FALSE | Muller cell            |
| GCACGTGdb/m2  | db/m | 911  | 0.016181 | FALSE | 0.298259 | FALSE | Photoreceptor          |
| GCACGTGdb/m2  | db/m | 576  | 0.019455 | FALSE | 45.65508 | TRUE  |                        |
| GCACTAA/db/m2 | db/m | 3930 | 0.060641 | FALSE | 1.282401 | FALSE | Photoreceptor          |
| GCACTAA/db/m2 | db/m | 9545 | 0.098234 | FALSE | 0.750053 | FALSE | Neuron                 |
| GCACTAACdb/m2 | db/m | 1961 | 0.007441 | FALSE | 1.175997 | FALSE | Photoreceptor          |
| GCACTAATdb/m2 | db/m | 8855 | 0.296296 | TRUE  | 3.112096 | FALSE |                        |
| GCACTAATdb/m2 | db/m | 2733 | 0.021669 | FALSE | 1.830176 | FALSE | Pericyte               |
| GCACTAATdb/m2 | db/m | 1944 | 0.011319 | FALSE | 1.180022 | FALSE | Endothelia Capillary E |
| GCACTAATdb/m2 | db/m | 411  | 0.046906 | FALSE | 35.55811 | TRUE  |                        |
| GCAGCCAdb/m2  | db/m | 2076 | 0.036891 | FALSE | 1.603841 | FALSE | Photoreceptor          |
| GCAGCTG(db/m2 | db/m | 451  | 0.010384 | FALSE | 2.711753 | FALSE | Muller cell            |
| GCAGGCT/db/m2 | db/m | 1605 | 0.051646 | FALSE | 3.255836 | FALSE | Muller cell            |
| GCAGGCT(db/m2 | db/m | 784  | 0.061912 | FALSE | 5.748988 | TRUE  |                        |
| GCAGGCT(db/m2 | db/m | 794  | 0.037564 | FALSE | 46.71378 | TRUE  |                        |
| GCAGGCT(db/m2 | db/m | 1548 | 0.068864 | FALSE | 33.36555 | TRUE  |                        |
| GCAGTTA(db/m2 | db/m | 5307 | 0.007058 | FALSE | 1.482519 | FALSE | Photoreceptor          |
| GCAGTTA(db/m2 | db/m | 6416 | 0.026796 | FALSE | 1.197765 | FALSE | Photoreceptor          |
| GCAGTTATdb/m2 | db/m | 8930 | 0.023682 | FALSE | 0.805673 | FALSE | Photoreceptor          |
| GCATCGG(db/m2 | db/m | 414  | 0.009493 | FALSE | 3.426697 | FALSE | Muller cell            |
| GCATCGG(db/m2 | db/m | 645  | 0.025868 | FALSE | 38.17204 | TRUE  |                        |
| GCATCTCAdb/m2 | db/m | 9793 | 0.018422 | FALSE | 0.724717 | FALSE | Photoreceptor          |
| GCATCTCAdb/m2 | db/m | 414  | 0.031973 | FALSE | 1.144743 | FALSE | Photoreceptor          |
| GCATCTCTdb/m2 | db/m | 740  | 0.061912 | FALSE | 2.81872  | FALSE | Neuron                 |
| GCATCTCTdb/m2 | db/m | 4824 | 0.026328 | FALSE | 1.23954  | FALSE | Endothelia Venous EC   |
| GCATGAT(db/m2 | db/m | 929  | 0.013074 | FALSE | 0.692546 | FALSE | Photoreceptor          |
| GCATGATdb/m2  | db/m | 3821 | 0.044326 | FALSE | 0.972602 | FALSE | Photoreceptor          |
| GCATTAG(db/m2 | db/m | 1044 | 0.031411 | FALSE | 0.546435 | FALSE | Photoreceptor          |
| GCATTAG(db/m2 | db/m | 556  | 0.026328 | FALSE | 38.22297 | TRUE  |                        |
| GCATTAG(db/m2 | db/m | 2879 | 0.078788 | FALSE | 2.159224 | FALSE | Photoreceptor          |
| GCCAACG/db/m2 | db/m | 774  | 0.023682 | FALSE | 0.710318 | FALSE | Photoreceptor          |
| GCCAACG/db/m2 | db/m | 2508 | 0.046906 | FALSE | 1.779488 | FALSE | Photoreceptor          |
| GCCAACG(db/m2 | db/m | 5721 | 0.076994 | FALSE | 1.073788 | FALSE | Photoreceptor          |

|                |      |      |          |       |          |       |                        |
|----------------|------|------|----------|-------|----------|-------|------------------------|
| GCCAGCA(db/m2  | db/m | 454  | 0.068864 | FALSE | 4.529157 | FALSE | Muller cell            |
| GCCAGCA(db/m2  | db/m | 407  | 0.009063 | FALSE | 1.004913 | FALSE | Photoreceptor          |
| GCCAGGT(db/m2  | db/m | 4528 | 0.012814 | FALSE | 0.862746 | FALSE | Photoreceptor          |
| GCCAGTG(db/m2  | db/m | 3851 | 0.004762 | FALSE | 1.234754 | FALSE | Neuron                 |
| GCCAGTG(db/m2  | db/m | 3607 | 0.046025 | FALSE | 1.881805 | FALSE | Photoreceptor          |
| GCCATGG(db/m2  | db/m | 353  | 0.038251 | FALSE | 39.41504 | TRUE  |                        |
| GCCATGG(db/m2  | db/m | 3367 | 0.009933 | FALSE | 1.331772 | FALSE | Photoreceptor          |
| GCCATGG db/m2  | db/m | 417  | 0.030318 | FALSE | 33.84031 | TRUE  |                        |
| GCCATGG db/m2  | db/m | 2572 | 0.029787 | FALSE | 0.994513 | FALSE | Photoreceptor          |
| GCCATTCA db/m2 | db/m | 3009 | 0.010846 | FALSE | 1.314903 | FALSE | Photoreceptor          |
| GCCATTCC db/m2 | db/m | 416  | 0.014711 | FALSE | 3.843094 | FALSE | Muller cell            |
| GCCATTCC db/m2 | db/m | 690  | 0.15354  | TRUE  | 21.20743 | TRUE  |                        |
| CCCCAGA db/m2  | db/m | 1401 | 0.023266 | FALSE | 0.505287 | FALSE | Photoreceptor          |
| CCCCAGA db/m2  | db/m | 450  | 0.034334 | FALSE | 1.295465 | FALSE | Photoreceptor          |
| CCCCGAA(db/m2  | db/m | 9235 | 0.019455 | FALSE | 0.851194 | FALSE | Photoreceptor          |
| CCCCGAA(db/m2  | db/m | 358  | 0.065957 | FALSE | 4.045152 | FALSE | Muller cell            |
| CCCCGAA db/m2  | db/m | 1089 | 0.024971 | FALSE | 1.141253 | FALSE | Photoreceptor          |
| CCCGATG(db/m2  | db/m | 674  | 0.008234 | FALSE | 40.63564 | TRUE  |                        |
| CCCGATG(db/m2  | db/m | 8620 | 0.018088 | FALSE | 0.638119 | FALSE | Photoreceptor          |
| CCCGATG(db/m2  | db/m | 566  | 0.028251 | FALSE | 1.534086 | FALSE | Photoreceptor          |
| CCCGATG(db/m2  | db/m | 1247 | 0.067388 | FALSE | 0.983542 | FALSE | Photoreceptor          |
| CCCGATG db/m2  | db/m | 1722 | 0.012052 | FALSE | 0.982759 | FALSE | Endothelia Capillary E |
| CCCGTGA db/m2  | db/m | 1111 | 0.034954 | FALSE | 1.540302 | FALSE | Photoreceptor          |
| CCCGTGA(db/m2  | db/m | 5860 | 0.014429 | FALSE | 0.918666 | FALSE | Photoreceptor          |
| GCCTGTTA db/m2 | db/m | 1943 | 0.064568 | FALSE | 1.815841 | FALSE | Photoreceptor          |
| GCCTGTTC db/m2 | db/m | 312  | 0.015287 | FALSE | 61.4052  | TRUE  |                        |
| GCCTGTTC db/m2 | db/m | 878  | 0.044326 | FALSE | 0.901203 | FALSE | Photoreceptor          |
| GCCTGTTC db/m2 | db/m | 530  | 0.012557 | FALSE | 56.56623 | TRUE  |                        |
| GCCTGTTT db/m2 | db/m | 3394 | 0.018088 | FALSE | 0.478053 | FALSE | Photoreceptor          |
| GCGAGAA db/m2  | db/m | 231  | 0.022455 | FALSE | 56.02007 | TRUE  |                        |
| GCGAGAA db/m2  | db/m | 6407 | 0.029266 | FALSE | 0.816818 | FALSE | Photoreceptor          |
| GCGAGAA db/m2  | db/m | 532  | 0.049679 | FALSE | 3.759845 | FALSE | Endothelia Capillary E |
| GCGATCG db/m2  | db/m | 1103 | 0.075259 | FALSE | 3.014032 | FALSE | Muller cell            |
| GCGATCG db/m2  | db/m | 889  | 0.053718 | FALSE | 2.900389 | FALSE | Pericyte               |
| GCGATCG db/m2  | db/m | 404  | 0.08663  | FALSE | 3.146305 | FALSE | Microglia              |
| GCGATCG(db/m2  | db/m | 4529 | 0.002756 | FALSE | 0.916318 | FALSE | Neuron                 |
| GCGATCG(db/m2  | db/m | 2335 | 0.039671 | FALSE | 1.805234 | FALSE | Endothelia Capillary E |
| GCGATCG(db/m2  | db/m | 2647 | 0.036891 | FALSE | 1.267971 | FALSE | Endothelia Aterial EC  |
| GCGGAAA db/m2  | db/m | 906  | 0.041154 | FALSE | 1.925564 | FALSE | Photoreceptor          |
| GCGGAAA db/m2  | db/m | 352  | 0.013876 | FALSE | 54.62687 | TRUE  |                        |
| GCGGATC db/m2  | db/m | 1587 | 0.022857 | FALSE | 0.821304 | FALSE | Photoreceptor          |
| GCGGATC(db/m2  | db/m | 898  | 0.064568 | FALSE | 3.523116 | FALSE | Muller cell            |
| GCGGATC(db/m2  | db/m | 3391 | 0.018088 | FALSE | 1.338178 | FALSE | Endothelia Venous EC   |
| GCGGATC db/m2  | db/m | 7467 | 0.030318 | FALSE | 0.872273 | FALSE | Photoreceptor          |
| GCGTGCA db/m2  | db/m | 936  | 0.038251 | FALSE | 0.960523 | FALSE | Photoreceptor          |
| GCGTTTCC db/m2 | db/m | 937  | 0.011319 | FALSE | 2.031902 | FALSE | Muller cell            |
| GCGTTTCT db/m2 | db/m | 1020 | 0.046025 | FALSE | 3.704296 | FALSE | Muller cell            |

|                 |      |      |          |       |          |       |                        |
|-----------------|------|------|----------|-------|----------|-------|------------------------|
| GCTACAA/ db/m2  | db/m | 819  | 0.025416 | FALSE | 3.162901 | FALSE | Endothelia Capillary E |
| GCTACAA( db/m2  | db/m | 2266 | 0.020536 | FALSE | 1.310512 | FALSE | Photoreceptor          |
| GCTACAAT db/m2  | db/m | 1227 | 0.018422 | FALSE | 0.295857 | FALSE | Photoreceptor          |
| GCTACCTG db/m2  | db/m | 3324 | 0.070386 | FALSE | 1.240138 | FALSE | Endothelia Capillary E |
| GCTCAAAC db/m2  | db/m | 393  | 0.016181 | FALSE | 58.15603 | TRUE  |                        |
| GCTCAAAC( db/m2 | db/m | 7500 | 0.019455 | FALSE | 0.986901 | FALSE | Photoreceptor          |
| GCTGAAT( db/m2  | db/m | 2860 | 0.05065  | FALSE | 1.970104 | FALSE | Endothelia Capillary E |
| GCTGAAT( db/m2  | db/m | 631  | 0.039671 | FALSE | 2.214168 | FALSE | Muller cell            |
| GCTGAAT( db/m2  | db/m | 982  | 0.021669 | FALSE | 1.632119 | FALSE | Neuron                 |
| GCTGAATT db/m2  | db/m | 465  | 0.007441 | FALSE | 1.656038 | FALSE | Pericyte               |
| GCTGAATT db/m2  | db/m | 620  | 0.048732 | FALSE | 3.167003 | FALSE | Neuron                 |
| GCTGCAG/ db/m2  | db/m | 357  | 0.016181 | FALSE | 57.98122 | TRUE  |                        |
| GCTGCAG/ db/m2  | db/m | 2178 | 0.022857 | FALSE | 1.552759 | FALSE | Endothelia Capillary E |
| GCTGCAG/ db/m2  | db/m | 690  | 0.012303 | FALSE | 44.20328 | TRUE  |                        |
| GCTGCAG( db/m2  | db/m | 878  | 0.014997 | FALSE | 0.445791 | FALSE | Photoreceptor          |
| GCTGGGT/ db/m2  | db/m | 780  | 0.020908 | FALSE | 0.529746 | FALSE | Photoreceptor          |
| GCTGGGT/ db/m2  | db/m | 2870 | 0.010384 | FALSE | 1.172074 | FALSE | Endothelia Aterial EC  |
| GCTGGGT/ db/m2  | db/m | 591  | 0.028251 | FALSE | 58.02988 | TRUE  |                        |
| GCTGGGT( db/m2  | db/m | 7444 | 0.013338 | FALSE | 1.637231 | FALSE | Neuron                 |
| GCTGGGT( db/m2  | db/m | 2983 | 0.018422 | FALSE | 1.713708 | FALSE | Endothelia Capillary E |
| GCTGGGT( db/m2  | db/m | 1444 | 0.031411 | FALSE | 1.977966 | FALSE | Endothelia Capillary E |
| GCTGGGT db/m2   | db/m | 2453 | 0.059406 | FALSE | 1.922804 | FALSE | Endothelia Capillary E |
| GCTGGGT db/m2   | db/m | 2451 | 0.041154 | FALSE | 1.845756 | FALSE | Photoreceptor          |
| GCTTCACC db/m2  | db/m | 6462 | 0.020171 | FALSE | 1.005259 | FALSE | Endothelia Capillary E |
| GCTTCACC db/m2  | db/m | 1077 | 0.017114 | FALSE | 0.585257 | FALSE | Photoreceptor          |
| GCTTCACT db/m2  | db/m | 535  | 0.026796 | FALSE | 44.3432  | TRUE  |                        |
| GCTTCACT db/m2  | db/m | 441  | 0.038953 | FALSE | 3.865612 | FALSE | Muller cell            |
| GCTTCACT db/m2  | db/m | 406  | 0.027758 | FALSE | 21.29338 | TRUE  |                        |
| GCTTGGG/ db/m2  | db/m | 303  | 0.058205 | FALSE | 4.626345 | FALSE | Muller cell            |
| GCTTGGG( db/m2  | db/m | 4096 | 0.00687  | FALSE | 1.475212 | FALSE | Neuron                 |
| GCTTGGG( db/m2  | db/m | 1196 | 0.030859 | FALSE | 2.304507 | FALSE | Muller cell            |
| GCTTGGG db/m2   | db/m | 515  | 0.029787 | FALSE | 41.71082 | TRUE  |                        |
| GCTTTCGA db/m2  | db/m | 367  | 0.068864 | FALSE | 64.81759 | TRUE  |                        |
| GCTTTCG( db/m2  | db/m | 1407 | 0.024971 | FALSE | 2.409203 | FALSE | Muller cell            |
| GCTTTCG( db/m2  | db/m | 2708 | 0.028754 | FALSE | 1.484855 | FALSE | Neuron                 |
| GGAAGTG db/m2   | db/m | 520  | 0.020171 | FALSE | 45.34246 | TRUE  |                        |
| GGAAGTG db/m2   | db/m | 467  | 0.053718 | FALSE | 2.841504 | FALSE | Endothelia Capillary E |
| GGAAGTG db/m2   | db/m | 620  | 0.068864 | FALSE | 3.115863 | FALSE | Muller cell            |
| GGAAGTG db/m2   | db/m | 392  | 0.078788 | FALSE | 4.912316 | FALSE | Muller cell            |
| GGAAGTG db/m2   | db/m | 518  | 0.040404 | FALSE | 4.991929 | FALSE | Muller cell            |
| GGAATCT( db/m2  | db/m | 466  | 0.049679 | FALSE | 30.09709 | TRUE  |                        |
| GGAATCT( db/m2  | db/m | 1294 | 0.059406 | FALSE | 1.499775 | FALSE | Photoreceptor          |
| GGAATCT db/m2   | db/m | 2855 | 0.100845 | TRUE  | 8.666953 | TRUE  |                        |
| GGAATGG. db/m2  | db/m | 457  | 0.034334 | FALSE | 47.26368 | TRUE  |                        |
| GGAATGG. db/m2  | db/m | 5388 | 0.020908 | FALSE | 0.934748 | FALSE | Photoreceptor          |
| GGAATGG db/m2   | db/m | 780  | 0.011319 | FALSE | 0.842103 | FALSE | Photoreceptor          |
| GGAATGG db/m2   | db/m | 702  | 0.034954 | FALSE | 39.11416 | TRUE  |                        |

|          |        |      |      |          |       |          |       |                        |
|----------|--------|------|------|----------|-------|----------|-------|------------------------|
| GGACGTC  | (db/m2 | db/m | 1646 | 0.046906 | FALSE | 3.722548 | FALSE | Muller cell            |
| GGACGTC  | (db/m2 | db/m | 2490 | 0.103567 | TRUE  | 5.164319 | TRUE  |                        |
| GGACGTC  | (db/m2 | db/m | 4862 | 0.029787 | FALSE | 0.859627 | FALSE | Photoreceptor          |
| GGACGTC  | (db/m2 | db/m | 1941 | 0.023682 | FALSE | 2.090967 | FALSE | Neuron                 |
| GGACGTC  | (db/m2 | db/m | 1001 | 0.047807 | FALSE | 0.891579 | FALSE | Photoreceptor          |
| GGACGTC  | (db/m2 | db/m | 729  | 0.01981  | FALSE | 0.415934 | FALSE | Photoreceptor          |
| GGAGAAC  | (db/m2 | db/m | 773  | 0.024534 | FALSE | 0.568713 | FALSE | Photoreceptor          |
| GGAGAAC  | (db/m2 | db/m | 9058 | 0.021286 | FALSE | 0.837729 | FALSE | Photoreceptor          |
| GGAGATG  | (db/m2 | db/m | 1817 | 0.067388 | FALSE | 0.979312 | FALSE | Photoreceptor          |
| GGAGATG  | (db/m2 | db/m | 1150 | 0.038953 | FALSE | 0.205261 | FALSE | Photoreceptor          |
| GGAGATG  | (db/m2 | db/m | 324  | 0.055901 | FALSE | 61.67247 | TRUE  |                        |
| GGAGATG  | (db/m2 | db/m | 2346 | 0.022455 | FALSE | 0.838354 | FALSE | Photoreceptor          |
| GGAGATG  | (db/m2 | db/m | 2873 | 0.004762 | FALSE | 1.550127 | FALSE | Neuron                 |
| GGAGCAA  | (db/m2 | db/m | 1692 | 0.027273 | FALSE | 1.528255 | FALSE | Photoreceptor          |
| GGAGCAA  | (db/m2 | db/m | 406  | 0.184701 | TRUE  | 20.62589 | TRUE  |                        |
| GGAGCAA  | (db/m2 | db/m | 1175 | 0.022059 | FALSE | 0.718431 | FALSE | Photoreceptor          |
| GGAGCAA  | (db/m2 | db/m | 558  | 0.150727 | TRUE  | 3.762136 | FALSE |                        |
| GGAGGAT  | (db/m2 | db/m | 1320 | 0.025868 | FALSE | 4.782772 | FALSE | Muller cell            |
| GGAGGAT  | (db/m2 | db/m | 450  | 0.063221 | FALSE | 14.50151 | TRUE  |                        |
| GGAGGAT  | (db/m2 | db/m | 1812 | 0.014151 | FALSE | 1.113668 | FALSE | Photoreceptor          |
| GGAGGTA  | (db/m2 | db/m | 6832 | 0.013876 | FALSE | 0.765486 | FALSE | Photoreceptor          |
| GGAGGTA  | (db/m2 | db/m | 382  | 0.017114 | FALSE | 46.45094 | TRUE  |                        |
| GGAGGTA  | (db/m2 | db/m | 595  | 0.054795 | FALSE | 30.24    | TRUE  |                        |
| GGATCTA  | (db/m2 | db/m | 5039 | 0.024534 | FALSE | 1.318775 | FALSE | Photoreceptor          |
| GGATCTA  | (db/m2 | db/m | 409  | 0.046025 | FALSE | 1.148325 | FALSE | Photoreceptor          |
| GGATCTA  | (db/m2 | db/m | 5690 | 0.137569 | TRUE  | 4.180666 | FALSE |                        |
| GGATCTA  | (db/m2 | db/m | 1492 | 0.036232 | FALSE | 2.947158 | FALSE | Photoreceptor          |
| GGATGTT  | (db/m2 | db/m | 4494 | 0.024534 | FALSE | 1.212822 | FALSE | Endothelia Venous EC   |
| GGCACGT  | (db/m2 | db/m | 4025 | 0.030859 | FALSE | 0.918521 | FALSE | Photoreceptor          |
| GGCACGT  | (db/m2 | db/m | 1389 | 0.037564 | FALSE | 1.674117 | FALSE | Photoreceptor          |
| GGCGTCA  | (db/m2 | db/m | 1670 | 0.095727 | FALSE | 2.46848  | FALSE | Muller cell            |
| GGCGTCA  | (db/m2 | db/m | 9671 | 0.022059 | FALSE | 0.867233 | FALSE | Photoreceptor          |
| GGCGTCA  | (db/m2 | db/m | 1870 | 0.013876 | FALSE | 1.201764 | FALSE | Endothelia Capillary E |
| GGCGTCA  | (db/m2 | db/m | 1104 | 0.046025 | FALSE | 0.891743 | FALSE | Photoreceptor          |
| GGCGTCA  | (db/m2 | db/m | 2811 | 0.138889 | TRUE  | 6.81671  | TRUE  |                        |
| GGCGTCA  | (db/m2 | db/m | 432  | 0.004762 | FALSE | 2.125935 | FALSE | Muller cell            |
| GGCTGTG  | (db/m2 | db/m | 2568 | 0.026328 | FALSE | 1.410227 | FALSE | Endothelia Capillary E |
| GGCTGTG  | (db/m2 | db/m | 4159 | 0.046906 | FALSE | 1.042506 | FALSE | Endothelia Venous EC   |
| GGCTGTG  | (db/m2 | db/m | 499  | 0.080645 | FALSE | 4.088248 | FALSE | Muller cell            |
| GGCTGTG  | (db/m2 | db/m | 5076 | 0.024105 | FALSE | 1.035854 | FALSE | Photoreceptor          |
| GGCTGTG  | (db/m2 | db/m | 3985 | 0.017114 | FALSE | 1.042509 | FALSE | Endothelia Venous EC   |
| GGCTTGG  | (db/m2 | db/m | 3896 | 0.022857 | FALSE | 1.010698 | FALSE | Endothelia Venous EC   |
| GGCTTGG  | (db/m2 | db/m | 324  | 0.026328 | FALSE | 40.27994 | TRUE  |                        |
| GGCTTGG  | (db/m2 | db/m | 2789 | 0.080645 | FALSE | 1.728855 | FALSE | Photoreceptor          |
| GGCTTGG  | (db/m2 | db/m | 3679 | 0.054795 | FALSE | 1.139604 | FALSE | Photoreceptor          |
| GGCTTTCA | (db/m2 | db/m | 4349 | 0.036891 | FALSE | 1.418066 | FALSE | Photoreceptor          |
| GGCTTTCC | (db/m2 | db/m | 4252 | 0.007833 | FALSE | 0.92901  | FALSE | Endothelia Capillary E |



|                |      |      |          |       |          |       |                        |
|----------------|------|------|----------|-------|----------|-------|------------------------|
| GGCTTTCC db/m2 | db/m | 426  | 0.049679 | FALSE | 2.925995 | FALSE | Muller cell            |
| GGCTTTCC db/m2 | db/m | 612  | 0.01981  | FALSE | 2.625231 | FALSE | Muller cell            |
| GGGAAGT db/m2  | db/m | 673  | 0.014429 | FALSE | 38.17455 | TRUE  |                        |
| GGGAAGT db/m2  | db/m | 1992 | 0.044326 | FALSE | 1.772137 | FALSE | Photoreceptor          |
| GGGACAA db/m2  | db/m | 603  | 0.042704 | FALSE | 3.964942 | FALSE | Muller cell            |
| GGGAGAT db/m2  | db/m | 3699 | 0.022455 | FALSE | 1.975854 | FALSE | Neuron                 |
| GGGAGAT db/m2  | db/m | 473  | 0.130374 | TRUE  | 29.37294 | TRUE  |                        |
| GGGAGAT db/m2  | db/m | 2720 | 0.008234 | FALSE | 1.525359 | FALSE | Endothelia Capillary E |
| GGGAGAT db/m2  | db/m | 8422 | 0.13452  | TRUE  | 2.847076 | FALSE |                        |
| GGGAGAT db/m2  | db/m | 3428 | 0.027273 | FALSE | 0.638785 | FALSE | Photoreceptor          |
| GGGAGTA db/m2  | db/m | 1359 | 0.021286 | FALSE | 1.493204 | FALSE | Photoreceptor          |
| GGGAGTA db/m2  | db/m | 497  | 0.061912 | FALSE | 4.044872 | FALSE | Muller cell            |
| GGGAGTA db/m2  | db/m | 1072 | 0.027758 | FALSE | 0.731407 | FALSE | Photoreceptor          |
| GGGAGTA db/m2  | db/m | 7596 | 0.065957 | FALSE | 0.984649 | FALSE | Endothelia Capillary E |
| GGGAGTA db/m2  | db/m | 610  | 0.042704 | FALSE | 0.622694 | FALSE | Photoreceptor          |
| GGGATCC db/m2  | db/m | 7686 | 0.021669 | FALSE | 0.907044 | FALSE | Photoreceptor          |
| GGGATCC db/m2  | db/m | 1407 | 0.047807 | FALSE | 3.374913 | FALSE | Muller cell            |
| GGGATCC db/m2  | db/m | 6079 | 0.014997 | FALSE | 1.263565 | FALSE | Photoreceptor          |
| GGGATCC db/m2  | db/m | 526  | 0.055901 | FALSE | 3.711788 | FALSE | Muller cell            |
| GGGATCC db/m2  | db/m | 587  | 0.038251 | FALSE | 2.871215 | FALSE | Muller cell            |
| GGGATCC db/m2  | db/m | 764  | 0.015287 | FALSE | 1.077411 | FALSE | Photoreceptor          |
| GGGATGA db/m2  | db/m | 1434 | 0.075259 | FALSE | 26.44896 | TRUE  |                        |
| GGGATGA db/m2  | db/m | 863  | 0.020536 | FALSE | 57.38472 | TRUE  |                        |
| GGGCCAT db/m2  | db/m | 5193 | 0.060641 | FALSE | 1.812907 | FALSE | Photoreceptor          |
| GGGCCAT db/m2  | db/m | 509  | 0.034334 | FALSE | 38.02178 | TRUE  |                        |
| GGGCCAT db/m2  | db/m | 4695 | 0.011561 | FALSE | 0.881002 | FALSE | Endothelia Capillary E |
| GGGCCAT db/m2  | db/m | 937  | 0.012303 | FALSE | 1.805396 | FALSE | Muller cell            |
| GGGCCAT db/m2  | db/m | 3689 | 0.012052 | FALSE | 1.248924 | FALSE | Photoreceptor          |
| GGGCGTT db/m2  | db/m | 1410 | 0.012814 | FALSE | 1.659183 | FALSE | Endothelia Capillary E |
| GGGCTAC db/m2  | db/m | 1227 | 0.044326 | FALSE | 3.389148 | FALSE | Muller cell            |
| GGGCTAC db/m2  | db/m | 750  | 0.148377 | TRUE  | 16.15385 | TRUE  |                        |
| GGGCTAC db/m2  | db/m | 3361 | 0.045165 | FALSE | 2.220883 | FALSE | Muller cell            |
| GGGCTAC db/m2  | db/m | 2061 | 0.098234 | FALSE | 1.381592 | FALSE | Photoreceptor          |
| GGGCTAC db/m2  | db/m | 568  | 0.018088 | FALSE | 41.1583  | TRUE  |                        |
| GGGCTCA db/m2  | db/m | 1647 | 0.036232 | FALSE | 1.462333 | FALSE | Photoreceptor          |
| GGGCTCA db/m2  | db/m | 2475 | 0.041154 | FALSE | 14.42085 | TRUE  |                        |
| GGGCTCA db/m2  | db/m | 651  | 0.029787 | FALSE | 40.29851 | TRUE  |                        |
| GGGCTCA db/m2  | db/m | 3271 | 0.100845 | TRUE  | 11.60758 | TRUE  |                        |
| GGGCTCA db/m2  | db/m | 829  | 0.022059 | FALSE | 48.01612 | TRUE  |                        |
| GGGCTCA db/m2  | db/m | 3628 | 0.029787 | FALSE | 0.932588 | FALSE | Photoreceptor          |
| GGGCTCA db/m2  | db/m | 188  | 0.015879 | FALSE | 69.89101 | TRUE  |                        |
| GGGTAGA db/m2  | db/m | 587  | 0.03313  | FALSE | 25.98736 | TRUE  |                        |
| GGGTAGA db/m2  | db/m | 9296 | 0.022059 | FALSE | 0.687    | FALSE | Photoreceptor          |
| GGGTAGA db/m2  | db/m | 7104 | 0.016799 | FALSE | 0.575054 | FALSE | Photoreceptor          |
| GGGTAGA db/m2  | db/m | 1343 | 0.043505 | FALSE | 3.017761 | FALSE | Photoreceptor          |
| GGGTAGA db/m2  | db/m | 1639 | 0.041154 | FALSE | 2.387796 | FALSE | Photoreceptor          |
| GGGTAGA db/m2  | db/m | 576  | 0.029266 | FALSE | 33.59041 | TRUE  |                        |

|                |      |      |          |       |          |       |                        |
|----------------|------|------|----------|-------|----------|-------|------------------------|
| GGGTAGA db/m2  | db/m | 1450 | 0.060641 | FALSE | 8.1464   | TRUE  |                        |
| GGGTATT db/m2  | db/m | 1130 | 0.037564 | FALSE | 43.04971 | TRUE  |                        |
| GGGTATT db/m2  | db/m | 396  | 0.038251 | FALSE | 2.994437 | FALSE | Pericyte               |
| GGGTCAC db/m2  | db/m | 912  | 0.01981  | FALSE | 0.957339 | FALSE | Photoreceptor          |
| GGGTCAC db/m2  | db/m | 4581 | 0.010157 | FALSE | 1.048512 | FALSE | Endothelia Capillary E |
| GGGTCTG db/m2  | db/m | 1060 | 0.034334 | FALSE | 46.59794 | TRUE  |                        |
| GGGTCTG db/m2  | db/m | 3269 | 0.04192  | FALSE | 1.659925 | FALSE | Photoreceptor          |
| GGGTCTG db/m2  | db/m | 913  | 0.013074 | FALSE | 0.705222 | FALSE | Photoreceptor          |
| GGGTCTG db/m2  | db/m | 7204 | 0.01981  | FALSE | 0.788495 | FALSE | Photoreceptor          |
| GGGTCTG db/m2  | db/m | 1577 | 0.017114 | FALSE | 0.18411  | FALSE | Photoreceptor          |
| GGGTGAA db/m2  | db/m | 691  | 0.115723 | TRUE  | 7.502468 | TRUE  |                        |
| GGGTGTC db/m2  | db/m | 7754 | 0.016488 | FALSE | 0.95613  | FALSE | Photoreceptor          |
| GGGTGTC db/m2  | db/m | 8117 | 0.019455 | FALSE | 0.920168 | FALSE | Photoreceptor          |
| GGGTGTC db/m2  | db/m | 276  | 0.012052 | FALSE | 68.59583 | TRUE  |                        |
| GGGTGTC db/m2  | db/m | 930  | 0.021286 | FALSE | 2.015182 | FALSE | Photoreceptor          |
| GGGTGTC db/m2  | db/m | 4544 | 0.061912 | FALSE | 1.256891 | FALSE | Endothelia Venous EC   |
| GGGTGTC db/m2  | db/m | 800  | 0.025868 | FALSE | 1.978789 | FALSE | Photoreceptor          |
| GGGTGTC db/m2  | db/m | 722  | 0.059406 | FALSE | 4.615129 | FALSE | Muller cell            |
| GGGTGTC db/m2  | db/m | 795  | 0.010614 | FALSE | 0.781662 | FALSE | Photoreceptor          |
| GGGTTATC db/m2 | db/m | 1592 | 0.059406 | FALSE | 2.425758 | FALSE | Photoreceptor          |
| GGGTTATC db/m2 | db/m | 5457 | 0.058205 | FALSE | 1.529055 | FALSE | Photoreceptor          |
| GGTAATC db/m2  | db/m | 244  | 0.044326 | FALSE | 19.2926  | TRUE  |                        |
| GGTAATC db/m2  | db/m | 532  | 0.019455 | FALSE | 0.899485 | FALSE | Photoreceptor          |
| GGTAGAG db/m2  | db/m | 1693 | 0.057037 | FALSE | 1.961312 | FALSE | Photoreceptor          |
| GGTAGAG db/m2  | db/m | 5865 | 0.035586 | FALSE | 0.865486 | FALSE | Photoreceptor          |
| GGTCACG db/m2  | db/m | 2887 | 0.078788 | FALSE | 1.619511 | FALSE | Neuron                 |
| GGTCACG db/m2  | db/m | 2314 | 0.020171 | FALSE | 0.536356 | FALSE | Photoreceptor          |
| GGTCACG db/m2  | db/m | 613  | 0.020908 | FALSE | 3.772805 | FALSE | Photoreceptor          |
| GGTCACG db/m2  | db/m | 1718 | 0.00687  | FALSE | 1.214508 | FALSE | Pericyte               |
| GGTCACG db/m2  | db/m | 286  | 0.117704 | TRUE  | 2.003643 | FALSE |                        |
| GGTCTGG db/m2  | db/m | 351  | 0.010614 | FALSE | 65.90389 | TRUE  |                        |
| GGTCTGG db/m2  | db/m | 5534 | 0.028251 | FALSE | 1.108214 | FALSE | Endothelia Capillary E |
| GGTCTGG db/m2  | db/m | 5818 | 0.047807 | FALSE | 1.15217  | FALSE | Photoreceptor          |
| GGTCTGG db/m2  | db/m | 2738 | 0.084562 | FALSE | 2.358009 | FALSE | Muller cell            |
| GGTCTGG db/m2  | db/m | 985  | 0.033726 | FALSE | 0.662215 | FALSE | Photoreceptor          |
| GGTGAAG db/m2  | db/m | 4392 | 0.028251 | FALSE | 0.85376  | FALSE | Photoreceptor          |
| GGTGAAG db/m2  | db/m | 3906 | 0.013876 | FALSE | 1.222964 | FALSE | Endothelia Venous EC   |
| GGTGATT db/m2  | db/m | 835  | 0.024534 | FALSE | 0.556366 | FALSE | Photoreceptor          |
| GGTGATT db/m2  | db/m | 338  | 0.046025 | FALSE | 12.29985 | TRUE  |                        |
| GGTGATT db/m2  | db/m | 660  | 0.04192  | FALSE | 1.297223 | FALSE | Microglia              |
| GGTGATT db/m2  | db/m | 398  | 0.01981  | FALSE | 4.475734 | FALSE | Muller cell            |
| GGTGATT db/m2  | db/m | 6092 | 0.014151 | FALSE | 0.890586 | FALSE | Photoreceptor          |
| GGTGGCT db/m2  | db/m | 471  | 0.024105 | FALSE | 53.84097 | TRUE  |                        |
| GGTGGCT db/m2  | db/m | 638  | 0.012052 | FALSE | 3.138779 | FALSE | Pericyte               |
| GGTGTTA db/m2  | db/m | 504  | 0.012814 | FALSE | 2.281801 | FALSE | Muller cell            |
| GGTGTTA db/m2  | db/m | 740  | 0.01981  | FALSE | 44.30014 | TRUE  |                        |
| GGTGTTA db/m2  | db/m | 628  | 0.046025 | FALSE | 2.604826 | FALSE | Muller cell            |

|                |      |      |          |       |          |       |                        |
|----------------|------|------|----------|-------|----------|-------|------------------------|
| GGTTAAC/ db/m2 | db/m | 1809 | 0.118221 | TRUE  | 2.787633 | FALSE |                        |
| GGTTAAC( db/m2 | db/m | 349  | 0.011319 | FALSE | 64.16185 | TRUE  |                        |
| GGTTAACT db/m2 | db/m | 3137 | 0.024105 | FALSE | 0.734122 | FALSE | Microglia              |
| GGTTAACT db/m2 | db/m | 421  | 0.053718 | FALSE | 1.274219 | FALSE | Photoreceptor          |
| GGTTCTCC db/m2 | db/m | 2064 | 0.073582 | FALSE | 2.15482  | FALSE | Photoreceptor          |
| GGTTCTCT db/m2 | db/m | 2019 | 0.024534 | FALSE | 1.210844 | FALSE | Endothelia Capillary E |
| GGTTCTCT db/m2 | db/m | 1241 | 0.012557 | FALSE | 0.842657 | FALSE | Photoreceptor          |
| GGTTGTA/ db/m2 | db/m | 1564 | 0.060641 | FALSE | 4.165111 | FALSE | Muller cell            |
| GGTTGTAC db/m2 | db/m | 6149 | 0.029266 | FALSE | 1.164453 | FALSE | Photoreceptor          |
| GGTTGTAC db/m2 | db/m | 646  | 0.038251 | FALSE | 37.37096 | TRUE  |                        |
| GGTTGTAC db/m2 | db/m | 3093 | 0.038953 | FALSE | 0.973279 | FALSE | Microglia              |
| GGTTGTAC db/m2 | db/m | 691  | 0.015581 | FALSE | 0.839025 | FALSE | Photoreceptor          |
| GGTTGTAI db/m2 | db/m | 439  | 0.026328 | FALSE | 0.92595  | FALSE | Photoreceptor          |
| GGTTGTAI db/m2 | db/m | 6303 | 0.026796 | FALSE | 0.817506 | FALSE | Photoreceptor          |
| GTAACAC/ db/m2 | db/m | 3445 | 0.184701 | TRUE  | 4.548595 | FALSE |                        |
| GTAACAC/ db/m2 | db/m | 593  | 0.010384 | FALSE | 0.359028 | FALSE | Photoreceptor          |
| GTAACAC( db/m2 | db/m | 2560 | 0.024971 | FALSE | 1.202691 | FALSE | Photoreceptor          |
| GTAACAC( db/m2 | db/m | 2899 | 0.030318 | FALSE | 1.951636 | FALSE | Photoreceptor          |
| GTAACACT db/m2 | db/m | 4578 | 0.024971 | FALSE | 1.222391 | FALSE | Photoreceptor          |
| GTAACCAC db/m2 | db/m | 3930 | 0.037564 | FALSE | 1.352374 | FALSE | Photoreceptor          |
| GTAACCAC db/m2 | db/m | 2824 | 0.007058 | FALSE | 1.833558 | FALSE | Photoreceptor          |
| GTAAGTC( db/m2 | db/m | 718  | 0.008438 | FALSE | 1.772028 | FALSE | Pericyte               |
| GTAATCG/ db/m2 | db/m | 5044 | 0.01981  | FALSE | 1.100596 | FALSE | Photoreceptor          |
| GTAATCG( db/m2 | db/m | 2052 | 0.011081 | FALSE | 1.084924 | FALSE | Endothelia Capillary E |
| GTAATCG( db/m2 | db/m | 617  | 0.032546 | FALSE | 0.989729 | FALSE | Photoreceptor          |
| GTAATGC/ db/m2 | db/m | 1967 | 0.022455 | FALSE | 1.260854 | FALSE | Photoreceptor          |
| GTAATGC/ db/m2 | db/m | 972  | 0.023266 | FALSE | 1.360161 | FALSE | Photoreceptor          |
| GTAATGC/ db/m2 | db/m | 3181 | 0.063221 | FALSE | 1.29631  | FALSE | Photoreceptor          |
| GTAATGCC db/m2 | db/m | 8884 | 0.028754 | FALSE | 0.718021 | FALSE | Photoreceptor          |
| GTAATGCT db/m2 | db/m | 734  | 0.020908 | FALSE | 0.363151 | FALSE | Photoreceptor          |
| GTACAAC/ db/m2 | db/m | 745  | 0.265464 | TRUE  | 16.44182 | TRUE  |                        |
| GTACAAC/ db/m2 | db/m | 1722 | 0.008032 | FALSE | 1.12462  | FALSE | Pericyte               |
| GTACAAC( db/m2 | db/m | 1622 | 0.046906 | FALSE | 0.623526 | FALSE | Photoreceptor          |
| GTACAAC( db/m2 | db/m | 4230 | 0.015287 | FALSE | 1.182634 | FALSE | Endothelia Venous EC   |
| GTACAACI db/m2 | db/m | 412  | 0.122388 | TRUE  | 4.066543 | FALSE |                        |
| GTACAGTC db/m2 | db/m | 2294 | 0.014429 | FALSE | 0.39302  | FALSE | Photoreceptor          |
| GTACAGTC db/m2 | db/m | 379  | 0.070386 | FALSE | 4.586168 | FALSE | Microglia              |
| GTACAGTI db/m2 | db/m | 3201 | 0.016181 | FALSE | 1.52838  | FALSE | Photoreceptor          |
| GTAGAAA` db/m2 | db/m | 762  | 0.064568 | FALSE | 2.019224 | FALSE | Endothelia Capillary E |
| GTAGAAA` db/m2 | db/m | 571  | 0.024534 | FALSE | 1.56235  | FALSE | Photoreceptor          |
| GTAGAAA` db/m2 | db/m | 1746 | 0.025416 | FALSE | 2.13861  | FALSE | Photoreceptor          |
| GTAGAGG. db/m2 | db/m | 428  | 0.122388 | TRUE  | 4.605263 | FALSE |                        |
| GTAGAGG. db/m2 | db/m | 592  | 0.016799 | FALSE | 0.944443 | FALSE | Photoreceptor          |
| GTAGAGG` db/m2 | db/m | 6110 | 0.022857 | FALSE | 0.943674 | FALSE | Photoreceptor          |
| GTAGAGG` db/m2 | db/m | 2414 | 0.012557 | FALSE | 1.402383 | FALSE | Photoreceptor          |
| GTAGAGG` db/m2 | db/m | 7138 | 0.200401 | TRUE  | 3.203075 | FALSE |                        |
| GTAGATCC db/m2 | db/m | 1183 | 0.004116 | FALSE | 1.488913 | FALSE | Pericyte               |

|                |      |      |          |       |          |       |                         |
|----------------|------|------|----------|-------|----------|-------|-------------------------|
| GTAGGAG db/m2  | db/m | 523  | 0.019106 | FALSE | 3.402092 | FALSE | Endothelia Capillary EC |
| GTAGGAG db/m2  | db/m | 1897 | 0.018761 | FALSE | 1.307966 | FALSE | Photoreceptor           |
| GTAGGTT db/m2  | db/m | 730  | 0.016488 | FALSE | 0.24154  | FALSE | Photoreceptor           |
| GTAGGTT db/m2  | db/m | 299  | 0.027273 | FALSE | 52.76243 | TRUE  |                         |
| GTAGTAC db/m2  | db/m | 1638 | 0.022059 | FALSE | 0.782467 | FALSE | Photoreceptor           |
| GTATTGG db/m2  | db/m | 1601 | 0.046025 | FALSE | 2.483681 | FALSE | Photoreceptor           |
| GTATTGG db/m2  | db/m | 1668 | 0.026796 | FALSE | 2.706334 | FALSE | Muller cell             |
| GTATTGG db/m2  | db/m | 460  | 0.109375 | TRUE  | 17.81609 | TRUE  |                         |
| GTATTGG db/m2  | db/m | 366  | 0.037564 | FALSE | 45.72047 | TRUE  |                         |
| GTATTTCC db/m2 | db/m | 1244 | 0.022857 | FALSE | 0.799114 | FALSE | Photoreceptor           |
| GTATTTCC db/m2 | db/m | 8339 | 0.018088 | FALSE | 0.738666 | FALSE | Photoreceptor           |
| GTATTTCT db/m2 | db/m | 2511 | 0.038953 | FALSE | 1.612308 | FALSE | Neuron                  |
| GTCAAAC db/m2  | db/m | 322  | 0.031973 | FALSE | 4.969521 | FALSE | Muller cell             |
| GTCAAAC db/m2  | db/m | 3435 | 0.014997 | FALSE | 1.543532 | FALSE | Endothelia Aterial EC   |
| GTCAAAC db/m2  | db/m | 8122 | 0.016799 | FALSE | 0.800976 | FALSE | Photoreceptor           |
| GTCAAAC db/m2  | db/m | 3583 | 0.071958 | FALSE | 1.260853 | FALSE | Endothelia Venous EC    |
| GTCAAGT db/m2  | db/m | 411  | 0.025868 | FALSE | 1.229455 | FALSE | Photoreceptor           |
| GTCAAGT db/m2  | db/m | 1375 | 0.058205 | FALSE | 1.658825 | FALSE | Photoreceptor           |
| GTCACGG db/m2  | db/m | 8904 | 0.018088 | FALSE | 0.817958 | FALSE | Photoreceptor           |
| GTCACGG db/m2  | db/m | 5825 | 0.01981  | FALSE | 0.682916 | FALSE | Photoreceptor           |
| GTCACGG db/m2  | db/m | 440  | 0.010614 | FALSE | 54.90621 | TRUE  |                         |
| GTCACGG db/m2  | db/m | 5501 | 0.015287 | FALSE | 0.725405 | FALSE | Photoreceptor           |
| GTCACGG db/m2  | db/m | 2183 | 0.037564 | FALSE | 1.212937 | FALSE | Photoreceptor           |
| GTCACGG db/m2  | db/m | 4548 | 0.014711 | FALSE | 1.161504 | FALSE | Endothelia Venous EC    |
| GTCACTCA db/m2 | db/m | 443  | 0.017434 | FALSE | 54.20267 | TRUE  |                         |
| GTCACTCC db/m2 | db/m | 5630 | 0.034334 | FALSE | 1.055471 | FALSE | Photoreceptor           |
| GTCACTCC db/m2 | db/m | 4206 | 0.009712 | FALSE | 1.472272 | FALSE | Photoreceptor           |
| GTCAGCG db/m2  | db/m | 534  | 0.038953 | FALSE | 4.750087 | FALSE | Muller cell             |
| GTCAGCG db/m2  | db/m | 2695 | 0.021286 | FALSE | 1.693581 | FALSE | Endothelia Aterial EC   |
| GTCAGCG db/m2  | db/m | 5835 | 0.017434 | FALSE | 0.700188 | FALSE | Photoreceptor           |
| GTCAGCG db/m2  | db/m | 656  | 0.020536 | FALSE | 42.07176 | TRUE  |                         |
| GTCAGCG db/m2  | db/m | 609  | 0.018761 | FALSE | 52.06237 | TRUE  |                         |
| GTCATCCC db/m2 | db/m | 1963 | 0.031973 | FALSE | 2.146492 | FALSE | Endothelia Venous EC    |
| GTCATCCC db/m2 | db/m | 6727 | 0.030318 | FALSE | 0.975288 | FALSE | Photoreceptor           |
| GTCATCCC db/m2 | db/m | 4833 | 0.013605 | FALSE | 0.972837 | FALSE | Photoreceptor           |
| GTCATGA db/m2  | db/m | 616  | 0.075259 | FALSE | 4.404348 | FALSE | Muller cell             |
| GTCATGA db/m2  | db/m | 1463 | 0.060641 | FALSE | 23.05425 | TRUE  |                         |
| GTCATGA db/m2  | db/m | 1999 | 0.052669 | FALSE | 1.161044 | FALSE | Neuron                  |
| GTCATGAC db/m2 | db/m | 504  | 0.016799 | FALSE | 52.71003 | TRUE  |                         |
| GTCATGAC db/m2 | db/m | 1290 | 0.031411 | FALSE | 2.113933 | FALSE | Endothelia Capillary EC |
| GTCATGAT db/m2 | db/m | 919  | 0.034954 | FALSE | 0.570912 | FALSE | Photoreceptor           |
| GTCATGAT db/m2 | db/m | 7455 | 0.024105 | FALSE | 1.009199 | FALSE | Photoreceptor           |
| GTCATTTA db/m2 | db/m | 405  | 0.007636 | FALSE | 55.08197 | TRUE  |                         |
| GTCATTTG db/m2 | db/m | 9240 | 0.014997 | FALSE | 0.372403 | FALSE | Photoreceptor           |
| GTCCACTA db/m2 | db/m | 613  | 0.042704 | FALSE | 3.494954 | FALSE | Muller cell             |
| GTCCACTC db/m2 | db/m | 986  | 0.026796 | FALSE | 0.508355 | FALSE | Photoreceptor           |
| GTCCACTC db/m2 | db/m | 872  | 0.075259 | FALSE | 2.737447 | FALSE | Photoreceptor           |

|               |      |      |          |       |          |       |                       |
|---------------|------|------|----------|-------|----------|-------|-----------------------|
| GTCCCATAdb/m2 | db/m | 532  | 0.017758 | FALSE | 61.16606 | TRUE  |                       |
| GTCCCATCdb/m2 | db/m | 407  | 0.051646 | FALSE | 37.9562  | TRUE  |                       |
| GTCCCATdb/m2  | db/m | 907  | 0.025868 | FALSE | 1.679113 | FALSE | Photoreceptor         |
| GTCCTCACdb/m2 | db/m | 279  | 0.15354  | TRUE  | 17.31749 | TRUE  |                       |
| GTCCTCACdb/m2 | db/m | 8377 | 0.028754 | FALSE | 0.992928 | FALSE | Photoreceptor         |
| GTCCTCATdb/m2 | db/m | 6628 | 0.019455 | FALSE | 0.431576 | FALSE | Photoreceptor         |
| GTCCTCATdb/m2 | db/m | 2584 | 0.029266 | FALSE | 0.968178 | FALSE | Photoreceptor         |
| GTCCTCATdb/m2 | db/m | 439  | 0.039671 | FALSE | 3.348193 | FALSE | Muller cell           |
| GTCGAATdb/m2  | db/m | 2434 | 0.057037 | FALSE | 1.34853  | FALSE | EndotheliaCapillary E |
| GTCGAATdb/m2  | db/m | 854  | 0.011805 | FALSE | 0.508622 | FALSE | Photoreceptor         |
| GTCGAATdb/m2  | db/m | 1075 | 0.034334 | FALSE | 4.888679 | FALSE | Muller cell           |
| GTCGAATdb/m2  | db/m | 9047 | 0.025868 | FALSE | 0.742224 | FALSE | Photoreceptor         |
| GTCGCGAdb/m2  | db/m | 3191 | 0.020171 | FALSE | 1.415911 | FALSE | EndotheliaCapillary E |
| GTCGCGAdb/m2  | db/m | 959  | 0.03313  | FALSE | 3.453844 | FALSE | Muller cell           |
| GTCGCGAdb/m2  | db/m | 848  | 0.03313  | FALSE | 48.03703 | TRUE  |                       |
| GTCGTAAdb/m2  | db/m | 3497 | 0.033726 | FALSE | 1.2865   | FALSE | Neuron                |
| GTCGTTCCdb/m2 | db/m | 564  | 0.026328 | FALSE | 1.11661  | FALSE | Photoreceptor         |
| GTCGTTCCdb/m2 | db/m | 6574 | 0.028251 | FALSE | 1.142262 | FALSE | Photoreceptor         |
| GTCGTTCCdb/m2 | db/m | 872  | 0.044326 | FALSE | 3.510805 | FALSE | Muller cell           |
| GTCTACCAdb/m2 | db/m | 1316 | 0.028251 | FALSE | 1.878238 | FALSE | EndotheliaCapillary E |
| GTCTACCCdb/m2 | db/m | 4077 | 0.03313  | FALSE | 1.254731 | FALSE | EndotheliaVenous EC   |
| GTCTAGAdb/m2  | db/m | 3908 | 0.030859 | FALSE | 0.906402 | FALSE | Photoreceptor         |
| GTCTAGAdb/m2  | db/m | 427  | 0.055901 | FALSE | 33.21471 | TRUE  |                       |
| GTCTAGAdb/m2  | db/m | 781  | 0.032546 | FALSE | 42.78023 | TRUE  |                       |
| GTCTAGAdb/m2  | db/m | 3980 | 0.021286 | FALSE | 1.409866 | FALSE | Neuron                |
| GTCTAGAdb/m2  | db/m | 1120 | 0.028251 | FALSE | 1.550011 | FALSE | Photoreceptor         |
| GTCTAGAdb/m2  | db/m | 1236 | 0.039671 | FALSE | 1.310389 | FALSE | Photoreceptor         |
| GTCTACAdb/m2  | db/m | 730  | 0.020536 | FALSE | 0.597764 | FALSE | Photoreceptor         |
| GTCTGTCAdb/m2 | db/m | 1334 | 0.265464 | TRUE  | 13.86139 | TRUE  |                       |
| GTCTGTCCdb/m2 | db/m | 4332 | 0.011319 | FALSE | 1.245668 | FALSE | Photoreceptor         |
| GTCTGTCTdb/m2 | db/m | 533  | 0.041154 | FALSE | 32.10943 | TRUE  |                       |
| GTCTGTCTdb/m2 | db/m | 3791 | 0.034954 | FALSE | 1.231914 | FALSE | Photoreceptor         |
| GTCTTTAAdb/m2 | db/m | 7069 | 0.042704 | FALSE | 0.784034 | FALSE | Photoreceptor         |
| GTCTTTAAdb/m2 | db/m | 323  | 0.03313  | FALSE | 36.46497 | TRUE  |                       |
| GTCTTTAAdb/m2 | db/m | 3905 | 0.010157 | FALSE | 1.2086   | FALSE | Photoreceptor         |
| GTCTTTACdb/m2 | db/m | 8605 | 0.021669 | FALSE | 0.981066 | FALSE | Photoreceptor         |
| GTCTTTACdb/m2 | db/m | 966  | 0.025416 | FALSE | 1.908374 | FALSE | Neuron                |
| GTCTTTACdb/m2 | db/m | 705  | 0.068864 | FALSE | 2.917034 | FALSE | Neuron                |
| GTCTTTAGdb/m2 | db/m | 9778 | 0.015287 | FALSE | 0.694741 | FALSE | Photoreceptor         |
| GTCTTTAGdb/m2 | db/m | 538  | 0.051646 | FALSE | 46.34313 | TRUE  |                       |
| GTGACGCdb/m2  | db/m | 7770 | 0.034954 | FALSE | 0.983364 | FALSE | Photoreceptor         |
| GTGACGCdb/m2  | db/m | 630  | 0.033726 | FALSE | 3.40146  | FALSE | Muller cell           |
| GTGACGCdb/m2  | db/m | 3535 | 0.012557 | FALSE | 1.215701 | FALSE | EndotheliaAterial EC  |
| GTGACGCdb/m2  | db/m | 1042 | 0.088776 | FALSE | 2.362027 | FALSE | EndotheliaCapillary E |
| GTGACGCdb/m2  | db/m | 1767 | 0.053718 | FALSE | 2.972871 | FALSE | Muller cell           |
| GTGACGCdb/m2  | db/m | 2397 | 0.035586 | FALSE | 1.465356 | FALSE | EndotheliaCapillary E |
| GTGAGCCdb/m2  | db/m | 547  | 0.042704 | FALSE | 42.95024 | TRUE  |                       |

|                |      |      |          |       |          |       |                        |
|----------------|------|------|----------|-------|----------|-------|------------------------|
| GTGAGTT/ db/m2 | db/m | 2784 | 0.005607 | FALSE | 1.173574 | FALSE | Neuron                 |
| GTGAGTT/ db/m2 | db/m | 346  | 0.023266 | FALSE | 40.92769 | TRUE  |                        |
| GTGAGTT( db/m2 | db/m | 595  | 0.018761 | FALSE | 3.320235 | FALSE | Muller cell            |
| GTGAGTT( db/m2 | db/m | 539  | 0.071958 | FALSE | 3.929092 | FALSE | Muller cell            |
| GTGATGT/ db/m2 | db/m | 825  | 0.043505 | FALSE | 2.297669 | FALSE | Photoreceptor          |
| GTGATGT/ db/m2 | db/m | 2152 | 0.024105 | FALSE | 0.857843 | FALSE | Photoreceptor          |
| GTGATGT/ db/m2 | db/m | 2779 | 0.041154 | FALSE | 1.843443 | FALSE | Photoreceptor          |
| GTGCACG( db/m2 | db/m | 548  | 0.088776 | FALSE | 3.340152 | FALSE | Muller cell            |
| GTGCACG( db/m2 | db/m | 564  | 0.012303 | FALSE | 68.17376 | TRUE  |                        |
| GTGCACG  db/m2 | db/m | 548  | 0.075259 | FALSE | 3.625586 | FALSE | Muller cell            |
| GTGCGTG/ db/m2 | db/m | 497  | 0.017758 | FALSE | 0.956364 | FALSE | Photoreceptor          |
| GTGCGTG/ db/m2 | db/m | 1467 | 0.022059 | FALSE | 1.50296  | FALSE | Endothelia Capillary E |
| GTGCTGG( db/m2 | db/m | 392  | 0.024105 | FALSE | 43.77031 | TRUE  |                        |
| GTGCTGG( db/m2 | db/m | 786  | 0.051646 | FALSE | 2.179125 | FALSE | Photoreceptor          |
| GTGCTGG( db/m2 | db/m | 3523 | 0.011319 | FALSE | 1.389663 | FALSE | Photoreceptor          |
| GTGCTTCT db/m2 | db/m | 3462 | 0.017434 | FALSE | 1.413361 | FALSE | Endothelia Capillary E |
| GTGGAAG. db/m2 | db/m | 4386 | 0.021286 | FALSE | 0.804805 | FALSE | Endothelia Venous EC   |
| GTGGAAG  db/m2 | db/m | 3728 | 0.013338 | FALSE | 1.19016  | FALSE | Endothelia Venous EC   |
| GTGGAAG  db/m2 | db/m | 630  | 0.035586 | FALSE | 2.731816 | FALSE | Muller cell            |
| GTGGAGA  db/m2 | db/m | 746  | 0.119568 | TRUE  | 2.492523 | FALSE |                        |
| GTGGAGA  db/m2 | db/m | 379  | 0.015287 | FALSE | 1.119786 | FALSE | Photoreceptor          |
| GTGGAGA  db/m2 | db/m | 7551 | 0.067388 | FALSE | 1.202741 | FALSE | Endothelia Venous EC   |
| GTGGAGA  db/m2 | db/m | 1203 | 0.046906 | FALSE | 0.717845 | FALSE | Photoreceptor          |
| GTGGCGT( db/m2 | db/m | 4548 | 0.014711 | FALSE | 1.249148 | FALSE | Photoreceptor          |
| GTGGCGT( db/m2 | db/m | 1972 | 0.018422 | FALSE | 1.692169 | FALSE | Endothelia Capillary E |
| GTGGCGT( db/m2 | db/m | 3469 | 0.046025 | FALSE | 1.399327 | FALSE | Neuron                 |
| GTGGCGT  db/m2 | db/m | 356  | 0.011561 | FALSE | 50.59589 | TRUE  |                        |
| GTGGGAA. db/m2 | db/m | 1382 | 0.060641 | FALSE | 4.003105 | FALSE | Muller cell            |
| GTGGGAA. db/m2 | db/m | 359  | 0.017114 | FALSE | 73.98649 | TRUE  |                        |
| GTGGGAA  db/m2 | db/m | 5411 | 0.028754 | FALSE | 1.041498 | FALSE | Photoreceptor          |
| GTGGGAA  db/m2 | db/m | 3073 | 0.016488 | FALSE | 0.435727 | FALSE | Photoreceptor          |
| GTGGTTA( db/m2 | db/m | 641  | 0.031973 | FALSE | 2.763376 | FALSE | Photoreceptor          |
| GTGGTTA( db/m2 | db/m | 405  | 0.044326 | FALSE | 31.7284  | TRUE  |                        |
| GTGTAAC  db/m2 | db/m | 511  | 0.026796 | FALSE | 26.03486 | TRUE  |                        |
| GTGTCCTA db/m2 | db/m | 2080 | 0.030318 | FALSE | 1.886333 | FALSE | Endothelia Capillary E |
| GTGTCCTA db/m2 | db/m | 951  | 0.055901 | FALSE | 4.114564 | FALSE | Muller cell            |
| GTGTCCTT db/m2 | db/m | 3970 | 0.010614 | FALSE | 1.099048 | FALSE | Endothelia Venous EC   |
| GTGTGAT/ db/m2 | db/m | 414  | 0.020908 | FALSE | 23.22485 | TRUE  |                        |
| GTGTGAT/ db/m2 | db/m | 458  | 0.036232 | FALSE | 9.156977 | TRUE  |                        |
| GTGTGAT/ db/m2 | db/m | 2525 | 0.030859 | FALSE | 1.443819 | FALSE | Photoreceptor          |
| GTGTGAT( db/m2 | db/m | 533  | 0.021286 | FALSE | 3.163764 | FALSE | Muller cell            |
| GTGTGAT( db/m2 | db/m | 969  | 0.005607 | FALSE | 2.297239 | FALSE | Pericyte               |
| GTGTGGC/ db/m2 | db/m | 637  | 0.028251 | FALSE | 44.59702 | TRUE  |                        |
| GTGTTAG( db/m2 | db/m | 385  | 0.039671 | FALSE | 38.19096 | TRUE  |                        |
| GTGTTAG( db/m2 | db/m | 3982 | 0.028251 | FALSE | 1.273417 | FALSE | Endothelia Venous EC   |
| GTGTTAG  db/m2 | db/m | 2965 | 0.064568 | FALSE | 1.4052   | FALSE | Photoreceptor          |
| GTGTTCCA db/m2 | db/m | 353  | 0.067388 | FALSE | 13.40782 | TRUE  |                        |

|                |      |      |          |       |          |       |                        |
|----------------|------|------|----------|-------|----------|-------|------------------------|
| GTGTTCCA db/m2 | db/m | 442  | 0.022857 | FALSE | 29.74026 | TRUE  |                        |
| GTGTTCCC db/m2 | db/m | 415  | 0.046906 | FALSE | 2.426569 | FALSE | Photoreceptor          |
| GTTACAGC db/m2 | db/m | 4477 | 0.067388 | FALSE | 13.1405  | TRUE  |                        |
| GTTACAGC db/m2 | db/m | 688  | 0.025416 | FALSE | 2.543355 | FALSE | Endothelia Capillary E |
| GTTACAGC db/m2 | db/m | 9857 | 0.041154 | FALSE | 0.759934 | FALSE | Photoreceptor          |
| GTTACCCA db/m2 | db/m | 882  | 0.093319 | FALSE | 4.36602  | FALSE | Muller cell            |
| GTTACCCC db/m2 | db/m | 6819 | 0.018088 | FALSE | 0.605225 | FALSE | Photoreceptor          |
| GTTACCCC db/m2 | db/m | 950  | 0.028251 | FALSE | 0.441869 | FALSE | Photoreceptor          |
| GTTACCCC db/m2 | db/m | 2237 | 0.036891 | FALSE | 1.83451  | FALSE | Photoreceptor          |
| GTTACCCT db/m2 | db/m | 7792 | 0.051646 | FALSE | 1.013114 | FALSE | Photoreceptor          |
| GTTACCCT db/m2 | db/m | 343  | 0.038953 | FALSE | 32.31293 | TRUE  |                        |
| GTTACGA db/m2  | db/m | 1509 | 0.052669 | FALSE | 2.031318 | FALSE | Photoreceptor          |
| GTTACGAT db/m2 | db/m | 287  | 0.020171 | FALSE | 53.58445 | TRUE  |                        |
| GTTAGAC db/m2  | db/m | 357  | 0.018088 | FALSE | 43.51621 | TRUE  |                        |
| GTTAGACC db/m2 | db/m | 871  | 0.067388 | FALSE | 0.834377 | FALSE | Photoreceptor          |
| GTTAGACT db/m2 | db/m | 5843 | 0.023266 | FALSE | 1.1887   | FALSE | Endothelia Venous EC   |
| GTTAGACT db/m2 | db/m | 2678 | 0.057037 | FALSE | 1.207083 | FALSE | Photoreceptor          |
| GTTAGTG db/m2  | db/m | 4379 | 0.034954 | FALSE | 1.085562 | FALSE | Photoreceptor          |
| GTTAGTG db/m2  | db/m | 1910 | 0.024105 | FALSE | 1.60775  | FALSE | Endothelia Capillary E |
| GTTAGTG db/m2  | db/m | 729  | 0.011319 | FALSE | 49.10931 | TRUE  |                        |
| GTTAGTG db/m2  | db/m | 4012 | 0.146004 | TRUE  | 2.826501 | FALSE |                        |
| GTTAGTG db/m2  | db/m | 737  | 0.011561 | FALSE | 2.138844 | FALSE | Muller cell            |
| GTTATGG db/m2  | db/m | 964  | 0.036232 | FALSE | 47.57499 | TRUE  |                        |
| GTTATGG db/m2  | db/m | 809  | 0.038953 | FALSE | 2.223654 | FALSE | Pericyte               |
| GTTATGG db/m2  | db/m | 3957 | 0.013074 | FALSE | 1.111602 | FALSE | Endothelia Capillary E |
| GTTCATTT db/m2 | db/m | 1323 | 0.024971 | FALSE | 0.569385 | FALSE | Photoreceptor          |
| GTTCCGTC db/m2 | db/m | 8988 | 0.033726 | FALSE | 0.725    | FALSE | Photoreceptor          |
| GTTCCGTC db/m2 | db/m | 470  | 0.101906 | TRUE  | 3.241491 | FALSE |                        |
| GTTCCGTG db/m2 | db/m | 5157 | 0.03313  | FALSE | 1.541215 | FALSE | Photoreceptor          |
| GTTCCGTT db/m2 | db/m | 398  | 0.018088 | FALSE | 68.61538 | TRUE  |                        |
| GTTCGCTC db/m2 | db/m | 4702 | 0.030318 | FALSE | 1.001659 | FALSE | Photoreceptor          |
| GTTCGCTT db/m2 | db/m | 802  | 0.052669 | FALSE | 3.249741 | FALSE | Endothelia Capillary E |
| GTTCTATA db/m2 | db/m | 2951 | 0.025868 | FALSE | 1.245442 | FALSE | Microglia              |
| GTTCTATC db/m2 | db/m | 502  | 0.078788 | FALSE | 2.727769 | FALSE | Muller cell            |
| GTTCTATG db/m2 | db/m | 3772 | 0.05065  | FALSE | 0.939211 | FALSE | Photoreceptor          |
| GTTCTATG db/m2 | db/m | 738  | 0.035586 | FALSE | 2.019549 | FALSE | Photoreceptor          |
| GTTCTATG db/m2 | db/m | 1072 | 0.052669 | FALSE | 0.694209 | FALSE | Photoreceptor          |
| GTTGAAC db/m2  | db/m | 826  | 0.068864 | FALSE | 2.773004 | FALSE | Endothelia Capillary E |
| GTTGAAC db/m2  | db/m | 889  | 0.025868 | FALSE | 1.907601 | FALSE | Photoreceptor          |
| GTTGAACC db/m2 | db/m | 4118 | 0.022857 | FALSE | 0.506509 | FALSE | Photoreceptor          |
| GTTGAACC db/m2 | db/m | 819  | 0.023266 | FALSE | 38.38527 | TRUE  |                        |
| GTTGAACT db/m2 | db/m | 315  | 0.024971 | FALSE | 49.83089 | TRUE  |                        |
| GTTGCGG db/m2  | db/m | 4351 | 0.080645 | FALSE | 1.051402 | FALSE | Photoreceptor          |
| GTTGCGG db/m2  | db/m | 2171 | 0.122388 | TRUE  | 4.74617  | FALSE |                        |
| GTTGCGG db/m2  | db/m | 2120 | 0.04192  | FALSE | 0.984757 | FALSE | Photoreceptor          |
| GTTGCGG db/m2  | db/m | 302  | 0.112477 | TRUE  | 19.81132 | TRUE  |                        |
| GTTGCTCA db/m2 | db/m | 1831 | 0.029266 | FALSE | 3.751567 | FALSE | Muller cell            |

|                |      |      |          |       |          |       |                        |
|----------------|------|------|----------|-------|----------|-------|------------------------|
| GTTGCTCA db/m2 | db/m | 1232 | 0.021669 | FALSE | 2.169822 | FALSE | Endothelia Capillary E |
| GTTGCTCC db/m2 | db/m | 332  | 0.024105 | FALSE | 44.8     | TRUE  |                        |
| GTTGCTCT db/m2 | db/m | 1208 | 0.014429 | FALSE | 0.47134  | FALSE | Photoreceptor          |
| GTTGCTCT db/m2 | db/m | 1252 | 0.029266 | FALSE | 27.63611 | TRUE  |                        |
| GTTGTAG db/m2  | db/m | 429  | 0.03313  | FALSE | 2.569828 | FALSE | Muller cell            |
| GTTGTAG db/m2  | db/m | 326  | 0.009493 | FALSE | 57.80105 | TRUE  |                        |
| GTTGTCCC db/m2 | db/m | 1357 | 0.109375 | TRUE  | 9.959017 | TRUE  |                        |
| GTTGTCCC db/m2 | db/m | 6026 | 0.063221 | FALSE | 1.234784 | FALSE | Neuron                 |
| GTTGTCCT db/m2 | db/m | 1873 | 0.055901 | FALSE | 1.393689 | FALSE | Endothelia Capillary E |
| GTTGTGAC db/m2 | db/m | 2097 | 0.040404 | FALSE | 1.403268 | FALSE | Photoreceptor          |
| GTTGTGAC db/m2 | db/m | 706  | 0.013338 | FALSE | 2.07457  | FALSE | Endothelia Capillary E |
| GTTTGGAC db/m2 | db/m | 4900 | 0.023266 | FALSE | 0.847996 | FALSE | Endothelia Venous EC   |
| TAACACG db/m2  | db/m | 3204 | 0.029787 | FALSE | 0.787609 | FALSE | Photoreceptor          |
| TAACCAGC db/m2 | db/m | 3090 | 0.070386 | FALSE | 1.837495 | FALSE | Photoreceptor          |
| TAACCAGT db/m2 | db/m | 2261 | 0.013876 | FALSE | 1.402276 | FALSE | Endothelia Capillary E |
| TAACCAGT db/m2 | db/m | 917  | 0.08663  | FALSE | 9.649122 | TRUE  |                        |
| TAACGACC db/m2 | db/m | 1188 | 0.064568 | FALSE | 10.20813 | TRUE  |                        |
| TAACGACC db/m2 | db/m | 1494 | 0.059406 | FALSE | 1.440368 | FALSE | Photoreceptor          |
| TAACGACT db/m2 | db/m | 437  | 0.014997 | FALSE | 51.33172 | TRUE  |                        |
| TAATTCC db/m2  | db/m | 6825 | 0.059406 | FALSE | 1.015053 | FALSE | Endothelia Venous EC   |
| TAATTCT db/m2  | db/m | 780  | 0.018761 | FALSE | 2.600247 | FALSE | Muller cell            |
| TAATTCT db/m2  | db/m | 3020 | 0.007636 | FALSE | 1.679413 | FALSE | Photoreceptor          |
| TAATTCT db/m2  | db/m | 386  | 0.038953 | FALSE | 31.75966 | TRUE  |                        |
| TAAGCAC db/m2  | db/m | 1598 | 0.021286 | FALSE | 1.45074  | FALSE | Endothelia Capillary E |
| TAAGCAC db/m2  | db/m | 1291 | 0.073582 | FALSE | 12.63693 | TRUE  |                        |
| TAAGCACT db/m2 | db/m | 2237 | 0.122691 | TRUE  | 11.36514 | TRUE  |                        |
| TAAGCACT db/m2 | db/m | 6172 | 0.014429 | FALSE | 1.211638 | FALSE | Photoreceptor          |
| TAAGCCA db/m2  | db/m | 757  | 0.036232 | FALSE | 35.58346 | TRUE  |                        |
| TAAGCCA db/m2  | db/m | 665  | 0.008852 | FALSE | 1.614388 | FALSE | Endothelia Capillary E |
| TAAGCCA db/m2  | db/m | 8534 | 0.016181 | FALSE | 0.829845 | FALSE | Photoreceptor          |
| TAAGTCG db/m2  | db/m | 2865 | 0.022455 | FALSE | 1.471576 | FALSE | Endothelia Capillary E |
| TAAGTCG db/m2  | db/m | 405  | 0.030318 | FALSE | 3.109637 | FALSE | Microglia              |
| TAAGTCG db/m2  | db/m | 1222 | 0.012557 | FALSE | 0.341811 | FALSE | Photoreceptor          |
| TAAGTCG db/m2  | db/m | 448  | 0.028251 | FALSE | 2.771385 | FALSE | Pericyte               |
| TAAGTCGT db/m2 | db/m | 3656 | 0.040404 | FALSE | 1.166129 | FALSE | Photoreceptor          |
| TAATCTCA db/m2 | db/m | 441  | 0.019455 | FALSE | 48.02514 | TRUE  |                        |
| TAATCTCC db/m2 | db/m | 7202 | 0.026796 | FALSE | 1.383246 | FALSE | Photoreceptor          |
| TAATCTCG db/m2 | db/m | 2243 | 0.068864 | FALSE | 2.431327 | FALSE | Muller cell            |
| TAATCTCT db/m2 | db/m | 2796 | 0.065957 | FALSE | 1.617404 | FALSE | Photoreceptor          |
| TAATTCCA db/m2 | db/m | 939  | 0.013605 | FALSE | 48.82054 | TRUE  |                        |
| TAATTCCA db/m2 | db/m | 1946 | 0.049679 | FALSE | 2.520977 | FALSE | Photoreceptor          |
| TAATTTCC db/m2 | db/m | 1502 | 0.042704 | FALSE | 2.228537 | FALSE | Photoreceptor          |
| TAATTTCC db/m2 | db/m | 2310 | 0.058205 | FALSE | 2.154293 | FALSE | Photoreceptor          |
| TAATTTCC db/m2 | db/m | 1426 | 0.004598 | FALSE | 1.926519 | FALSE | Endothelia Capillary E |
| TAATTTCC db/m2 | db/m | 538  | 0.093319 | FALSE | 3.018519 | FALSE | Photoreceptor          |
| TAATTCCT db/m2 | db/m | 791  | 0.035586 | FALSE | 4.335729 | FALSE | Muller cell            |
| TACAACGC db/m2 | db/m | 462  | 0.010157 | FALSE | 53.34282 | TRUE  |                        |



|                |      |      |          |       |          |       |                        |
|----------------|------|------|----------|-------|----------|-------|------------------------|
| TACAACGC db/m2 | db/m | 568  | 0.061912 | FALSE | 43.52227 | TRUE  |                        |
| TACACCCA db/m2 | db/m | 3358 | 0.033726 | FALSE | 1.693003 | FALSE | Photoreceptor          |
| TACACCCA db/m2 | db/m | 9138 | 0.039671 | FALSE | 1.003625 | FALSE | Photoreceptor          |
| TACACCCA db/m2 | db/m | 1357 | 0.039671 | FALSE | 2.009695 | FALSE | Photoreceptor          |
| TACACCCT db/m2 | db/m | 2217 | 0.088776 | FALSE | 10.70925 | TRUE  |                        |
| TACACCCT db/m2 | db/m | 869  | 0.052669 | FALSE | 2.526965 | FALSE | Muller cell            |
| TACATTCA db/m2 | db/m | 4888 | 0.024534 | FALSE | 0.902788 | FALSE | Photoreceptor          |
| TACATTCA db/m2 | db/m | 7356 | 0.15354  | TRUE  | 3.939531 | FALSE |                        |
| TACATTCT db/m2 | db/m | 498  | 0.021286 | FALSE | 39.18526 | TRUE  |                        |
| TACCCACG db/m2 | db/m | 2379 | 0.016799 | FALSE | 1.952534 | FALSE | Pericyte               |
| TACCCACG db/m2 | db/m | 484  | 0.017758 | FALSE | 2.187222 | FALSE | Photoreceptor          |
| TACCCGTG db/m2 | db/m | 1533 | 0.045165 | FALSE | 0.945407 | FALSE | Muller cell            |
| TACCCGTG db/m2 | db/m | 7854 | 0.016181 | FALSE | 0.768607 | FALSE | Photoreceptor          |
| TACCGAAC db/m2 | db/m | 1214 | 0.048732 | FALSE | 3.641258 | FALSE | Muller cell            |
| TACCGAAC db/m2 | db/m | 9864 | 0.011561 | FALSE | 0.55606  | FALSE | Photoreceptor          |
| TACCGAAT db/m2 | db/m | 524  | 0.093319 | FALSE | 2.254669 | FALSE | Muller cell            |
| TACCGGGC db/m2 | db/m | 1057 | 0.034954 | FALSE | 2.700301 | FALSE | Photoreceptor          |
| TACCGGGC db/m2 | db/m | 393  | 0.047807 | FALSE | 0.474707 | FALSE | Neuron                 |
| TACCGGGC db/m2 | db/m | 2972 | 0.054795 | FALSE | 1.247461 | FALSE | Endothelia Venous EC   |
| TACCGGGC db/m2 | db/m | 1017 | 0.068864 | FALSE | 3.945088 | FALSE | Muller cell            |
| TACCTCGA db/m2 | db/m | 4830 | 0.019455 | FALSE | 0.833252 | FALSE | Photoreceptor          |
| TACCTCGA db/m2 | db/m | 2664 | 0.015287 | FALSE | 1.314177 | FALSE | Photoreceptor          |
| TACCTCGT db/m2 | db/m | 8364 | 0.014429 | FALSE | 0.982478 | FALSE | Photoreceptor          |
| TACCTCGT db/m2 | db/m | 9000 | 0.016488 | FALSE | 0.736236 | FALSE | Photoreceptor          |
| TACCTGCA db/m2 | db/m | 1299 | 0.004598 | FALSE | 1.333794 | FALSE | Endothelia Capillary E |
| TACCTGCC db/m2 | db/m | 585  | 0.027758 | FALSE | 32.17778 | TRUE  |                        |
| TACGCTCA db/m2 | db/m | 1089 | 0.026796 | FALSE | 22.90336 | TRUE  |                        |
| TACGCTCC db/m2 | db/m | 1089 | 0.037564 | FALSE | 2.758528 | FALSE | Pericyte               |
| TACGCTCC db/m2 | db/m | 2104 | 0.027273 | FALSE | 1.243425 | FALSE | Endothelia Capillary E |
| TACGCTCC db/m2 | db/m | 1455 | 0.014151 | FALSE | 0.425232 | FALSE | Photoreceptor          |
| TACGCTCC db/m2 | db/m | 1282 | 0.051646 | FALSE | 16.15222 | TRUE  |                        |
| TACGGGC/ db/m2 | db/m | 7334 | 0.053718 | FALSE | 0.923001 | FALSE | Endothelia Venous EC   |
| TACGGGC/ db/m2 | db/m | 268  | 0.017434 | FALSE | 62.2248  | TRUE  |                        |
| TACGGTAC db/m2 | db/m | 538  | 0.013876 | FALSE | 0.339776 | FALSE | Photoreceptor          |
| TACGGTAT db/m2 | db/m | 4991 | 0.012557 | FALSE | 1.314091 | FALSE | Photoreceptor          |
| TACGTCCA db/m2 | db/m | 1045 | 0.024971 | FALSE | 0.758616 | FALSE | Photoreceptor          |
| TACGTCCA db/m2 | db/m | 1907 | 0.036232 | FALSE | 1.166057 | FALSE | Photoreceptor          |
| TACGTCCC db/m2 | db/m | 454  | 0.037564 | FALSE | 3.70443  | FALSE | Photoreceptor          |
| TACGTCCC db/m2 | db/m | 742  | 0.016488 | FALSE | 29.87844 | TRUE  |                        |
| TACGTCCC db/m2 | db/m | 4348 | 0.013876 | FALSE | 1.09841  | FALSE | Endothelia Venous EC   |
| TACGTCCC db/m2 | db/m | 1027 | 0.029787 | FALSE | 45.56998 | TRUE  |                        |
| TACGTCCT db/m2 | db/m | 2485 | 0.018088 | FALSE | 1.473313 | FALSE | Endothelia Aterial EC  |
| TACTGCCA db/m2 | db/m | 3672 | 0.031411 | FALSE | 0.850527 | FALSE | Photoreceptor          |
| TACTGCCA db/m2 | db/m | 1503 | 0.046025 | FALSE | 0.751973 | FALSE | Photoreceptor          |
| TACTGCCT db/m2 | db/m | 907  | 0.054795 | FALSE | 4.997542 | FALSE | Muller cell            |
| TACTTACA db/m2 | db/m | 2588 | 0.067388 | FALSE | 1.430321 | FALSE | Endothelia Capillary E |
| TACTTACC db/m2 | db/m | 789  | 0.005607 | FALSE | 1.559165 | FALSE | Endothelia Capillary E |

|                |      |      |          |       |          |       |                        |
|----------------|------|------|----------|-------|----------|-------|------------------------|
| TACTTACC db/m2 | db/m | 5874 | 0.038251 | FALSE | 0.652766 | FALSE | Photoreceptor          |
| TACTTACG db/m2 | db/m | 471  | 0.095727 | FALSE | 4.903482 | FALSE | Muller cell            |
| TACTTACG db/m2 | db/m | 5176 | 0.021669 | FALSE | 0.990537 | FALSE | Endothelia Venous EC   |
| TACTTCAA db/m2 | db/m | 428  | 0.042704 | FALSE | 0.999723 | FALSE | Photoreceptor          |
| TACTTCAA db/m2 | db/m | 3905 | 0.007441 | FALSE | 1.665681 | FALSE | Photoreceptor          |
| TACTTCAC db/m2 | db/m | 459  | 0.018088 | FALSE | 3.817495 | FALSE | Muller cell            |
| TACTTCAC db/m2 | db/m | 1023 | 0.137569 | TRUE  | 4.32     | FALSE |                        |
| TACTTCAG db/m2 | db/m | 943  | 0.037564 | FALSE | 0.70999  | FALSE | Photoreceptor          |
| TACTTCAG db/m2 | db/m | 452  | 0.045165 | FALSE | 0.71556  | FALSE | Endothelia Capillary E |
| TACTTCAT db/m2 | db/m | 5150 | 0.012052 | FALSE | 0.977448 | FALSE | Photoreceptor          |
| TACTTGTA db/m2 | db/m | 312  | 0.017758 | FALSE | 72.05364 | TRUE  |                        |
| TACTTGTA db/m2 | db/m | 3456 | 0.036891 | FALSE | 1.597791 | FALSE | Endothelia Venous EC   |
| TACTTGTC db/m2 | db/m | 3057 | 0.020908 | FALSE | 1.123404 | FALSE | Photoreceptor          |
| TACTTGTC db/m2 | db/m | 1578 | 0.048732 | FALSE | 0.581832 | FALSE | Photoreceptor          |
| TACTTGTC db/m2 | db/m | 615  | 0.013876 | FALSE | 44.94315 | TRUE  |                        |
| TACTTGTC db/m2 | db/m | 3457 | 0.060641 | FALSE | 1.38577  | FALSE | Photoreceptor          |
| TACTTGTC db/m2 | db/m | 2996 | 0.041154 | FALSE | 1.337958 | FALSE | Photoreceptor          |
| TAGACCAC db/m2 | db/m | 853  | 0.04192  | FALSE | 0.765896 | FALSE | Photoreceptor          |
| TAGACCAC db/m2 | db/m | 5813 | 0.019455 | FALSE | 0.923639 | FALSE | Endothelia Venous EC   |
| TAGACCAC db/m2 | db/m | 556  | 0.007058 | FALSE | 2.881007 | FALSE | Muller cell            |
| TAGACTG db/m2  | db/m | 2095 | 0.026796 | FALSE | 1.024475 | FALSE | Endothelia Capillary E |
| TAGACTG db/m2  | db/m | 1270 | 0.044326 | FALSE | 1.838621 | FALSE | Photoreceptor          |
| TAGAGTC db/m2  | db/m | 8046 | 0.028754 | FALSE | 0.820921 | FALSE | Photoreceptor          |
| TAGAGTC db/m2  | db/m | 2234 | 0.110901 | TRUE  | 4.366239 | FALSE |                        |
| TAGATCG db/m2  | db/m | 4172 | 0.059406 | FALSE | 1.074383 | FALSE | Photoreceptor          |
| TAGATCG db/m2  | db/m | 3150 | 0.012557 | FALSE | 1.500461 | FALSE | Photoreceptor          |
| TAGACAC db/m2  | db/m | 657  | 0.080645 | FALSE | 3.039072 | FALSE | Microglia              |
| TAGGAGG db/m2  | db/m | 2248 | 0.038953 | FALSE | 1.733975 | FALSE | Photoreceptor          |
| TAGGAGG db/m2  | db/m | 3423 | 0.013876 | FALSE | 1.292061 | FALSE | Photoreceptor          |
| TAGGAGG db/m2  | db/m | 3997 | 0.016799 | FALSE | 1.330301 | FALSE | Endothelia Capillary E |
| TAGGAGG db/m2  | db/m | 2931 | 0.038251 | FALSE | 0.62764  | FALSE | Photoreceptor          |
| TAGGAGG db/m2  | db/m | 2555 | 0.027758 | FALSE | 1.054145 | FALSE | Endothelia Aterial EC  |
| TAGGGTT db/m2  | db/m | 6030 | 0.055901 | FALSE | 1.242785 | FALSE | Photoreceptor          |
| TAGGGTT db/m2  | db/m | 2611 | 0.014429 | FALSE | 1.359157 | FALSE | Endothelia Capillary E |
| TAGGGTT db/m2  | db/m | 2500 | 0.054795 | FALSE | 1.203298 | FALSE | Photoreceptor          |
| TAGGTAC db/m2  | db/m | 731  | 0.009493 | FALSE | 0.700061 | FALSE | Photoreceptor          |
| TAGGTAC db/m2  | db/m | 640  | 0.010614 | FALSE | 0.474256 | FALSE | Photoreceptor          |
| TAGGTTG db/m2  | db/m | 8759 | 0.025868 | FALSE | 0.853163 | FALSE | Photoreceptor          |
| TAGGTTG db/m2  | db/m | 521  | 0.03313  | FALSE | 33.66261 | TRUE  |                        |
| TAGGTTG db/m2  | db/m | 1776 | 0.051646 | FALSE | 2.582603 | FALSE | Muller cell            |
| TAGGTTG db/m2  | db/m | 487  | 0.073582 | FALSE | 3.950138 | FALSE | Photoreceptor          |
| TATACCTA db/m2 | db/m | 466  | 0.070386 | FALSE | 4.841627 | FALSE | Muller cell            |
| TATATCCG db/m2 | db/m | 9059 | 0.143501 | TRUE  | 2.25356  | FALSE |                        |
| TATCAGGT db/m2 | db/m | 6521 | 0.064568 | FALSE | 1.106594 | FALSE | Neuron                 |
| TATCCTAC db/m2 | db/m | 9851 | 0.017434 | FALSE | 0.64298  | FALSE | Photoreceptor          |
| TATCCTAC db/m2 | db/m | 936  | 0.034334 | FALSE | 0.925099 | FALSE | Photoreceptor          |
| TATCCTAG db/m2 | db/m | 7886 | 0.018422 | FALSE | 0.526983 | FALSE | Photoreceptor          |

|          |       |      |      |          |       |          |       |                        |
|----------|-------|------|------|----------|-------|----------|-------|------------------------|
| TATCTAT  | db/m2 | db/m | 4914 | 0.018422 | FALSE | 0.978108 | FALSE | Endothelia Aterial EC  |
| TATCGCCA | db/m2 | db/m | 2863 | 0.164835 | TRUE  | 10.68442 | TRUE  |                        |
| TATCGCCC | db/m2 | db/m | 892  | 0.057037 | FALSE | 3.803805 | FALSE | Muller cell            |
| TATCGCCT | db/m2 | db/m | 522  | 0.014997 | FALSE | 3.015275 | FALSE | Muller cell            |
| TATCTGTC | db/m2 | db/m | 4636 | 0.033726 | FALSE | 1.418085 | FALSE | Photoreceptor          |
| TATCTGTC | db/m2 | db/m | 1702 | 0.043505 | FALSE | 1.452771 | FALSE | Photoreceptor          |
| TATCTGTG | db/m2 | db/m | 925  | 0.073582 | FALSE | 0.874419 | FALSE | Photoreceptor          |
| TATCTTGA | db/m2 | db/m | 3577 | 0.020536 | FALSE | 1.116518 | FALSE | Photoreceptor          |
| TATCTTGT | db/m2 | db/m | 5281 | 0.073582 | FALSE | 1.133    | FALSE | Neuron                 |
| TATGTTCC | db/m2 | db/m | 1606 | 0.017434 | FALSE | 0.638165 | FALSE | Photoreceptor          |
| TATTCCAA | db/m2 | db/m | 7126 | 0.049679 | FALSE | 1.358805 | FALSE | Neuron                 |
| TATTCCAA | db/m2 | db/m | 355  | 0.073582 | FALSE | 1.581457 | FALSE | Endothelia Capillary E |
| TATTCCAG | db/m2 | db/m | 379  | 0.015879 | FALSE | 1.383474 | FALSE | Photoreceptor          |
| TATTGCTA | db/m2 | db/m | 959  | 0.038953 | FALSE | 3.360589 | FALSE | Muller cell            |
| TATTGCTG | db/m2 | db/m | 1310 | 0.053718 | FALSE | 1.436877 | FALSE | Photoreceptor          |
| TATTGCTG | db/m2 | db/m | 2327 | 0.010614 | FALSE | 1.272918 | FALSE | Endothelia Capillary E |
| TATTGCTG | db/m2 | db/m | 590  | 0.036232 | FALSE | 31.455   | TRUE  |                        |
| TATTGCTT | db/m2 | db/m | 3920 | 0.007441 | FALSE | 1.554124 | FALSE | Photoreceptor          |
| TATTGGG  | db/m2 | db/m | 1335 | 0.031973 | FALSE | 1.003282 | FALSE | Photoreceptor          |
| TATTGGG  | db/m2 | db/m | 819  | 0.013074 | FALSE | 0.323361 | FALSE | Photoreceptor          |
| TATTGGG  | db/m2 | db/m | 477  | 0.046906 | FALSE | 2.811136 | FALSE | Photoreceptor          |
| TATTGGG  | db/m2 | db/m | 4842 | 0.018088 | FALSE | 1.07053  | FALSE | Endothelia Venous EC   |
| TATTGGG  | db/m2 | db/m | 4956 | 0.026328 | FALSE | 1.210869 | FALSE | Photoreceptor          |
| TCAAGAC  | db/m2 | db/m | 1805 | 0.075259 | FALSE | 3.844913 | FALSE | Muller cell            |
| TCAAGACC | db/m2 | db/m | 797  | 0.024971 | FALSE | 0.744299 | FALSE | Photoreceptor          |
| TCAAGACC | db/m2 | db/m | 473  | 0.027273 | FALSE | 0.84592  | FALSE | Photoreceptor          |
| TCAAGCAC | db/m2 | db/m | 338  | 0.038251 | FALSE | 17.14836 | TRUE  |                        |
| TCAAGCAC | db/m2 | db/m | 1228 | 0.015581 | FALSE | 0.684577 | FALSE | Photoreceptor          |
| TCAAGCAT | db/m2 | db/m | 501  | 0.022857 | FALSE | 0.365346 | FALSE | Photoreceptor          |
| TCAAGTG  | db/m2 | db/m | 1375 | 0.019106 | FALSE | 27.20157 | TRUE  |                        |
| TCAAGTG  | db/m2 | db/m | 551  | 0.015287 | FALSE | 2.703776 | FALSE | Muller cell            |
| TCAAGTG  | db/m2 | db/m | 445  | 0.014711 | FALSE | 1.493069 | FALSE | Muller cell            |
| TCAATCTA | db/m2 | db/m | 493  | 0.035586 | FALSE | 40.84034 | TRUE  |                        |
| TCAATCTG | db/m2 | db/m | 2915 | 0.041154 | FALSE | 1.619228 | FALSE | Endothelia Capillary E |
| TCAATCTT | db/m2 | db/m | 2241 | 0.055901 | FALSE | 2.004366 | FALSE | Endothelia Capillary E |
| TCAATCTT | db/m2 | db/m | 1150 | 0.053718 | FALSE | 1.424946 | FALSE | Photoreceptor          |
| TCAATTCT | db/m2 | db/m | 6089 | 0.05065  | FALSE | 1.264906 | FALSE | Endothelia Venous EC   |
| TCACAAG  | db/m2 | db/m | 2330 | 0.052669 | FALSE | 1.49144  | FALSE | Photoreceptor          |
| TCACAAG  | db/m2 | db/m | 2732 | 0.017434 | FALSE | 0.874099 | FALSE | Photoreceptor          |
| TCACACCA | db/m2 | db/m | 4687 | 0.019106 | FALSE | 1.199225 | FALSE | Photoreceptor          |
| TCACACCT | db/m2 | db/m | 7082 | 0.177638 | TRUE  | 4.572881 | FALSE |                        |
| TCACATTC | db/m2 | db/m | 6518 | 0.030859 | FALSE | 0.866298 | FALSE | Photoreceptor          |
| TCACATTC | db/m2 | db/m | 1070 | 0.057037 | FALSE | 1.181837 | FALSE | Photoreceptor          |
| TCACATTC | db/m2 | db/m | 2378 | 0.027273 | FALSE | 1.437034 | FALSE | Photoreceptor          |
| TCACATTG | db/m2 | db/m | 5082 | 0.036891 | FALSE | 1.301484 | FALSE | Photoreceptor          |
| TCACGCTA | db/m2 | db/m | 716  | 0.031973 | FALSE | 0.246383 | FALSE | Endothelia Capillary E |
| TCACGCTA | db/m2 | db/m | 481  | 0.037564 | FALSE | 2.366933 | FALSE | Pericyte               |

|                |      |      |          |       |          |       |                        |
|----------------|------|------|----------|-------|----------|-------|------------------------|
| TCACGCTC db/m2 | db/m | 841  | 0.017758 | FALSE | 0.851258 | FALSE | Photoreceptor          |
| TCACGCTC db/m2 | db/m | 733  | 0.057037 | FALSE | 29.22403 | TRUE  |                        |
| TCACGCTC db/m2 | db/m | 4866 | 0.020171 | FALSE | 0.985218 | FALSE | Photoreceptor          |
| TCACGCTC db/m2 | db/m | 4294 | 0.006499 | FALSE | 0.71844  | FALSE | Neuron                 |
| TCACGCTT db/m2 | db/m | 637  | 0.070386 | FALSE | 4.726361 | FALSE | Muller cell            |
| TCACGCTT db/m2 | db/m | 1941 | 0.022059 | FALSE | 1.060509 | FALSE | Photoreceptor          |
| TCACGGG db/m2  | db/m | 5905 | 0.049679 | FALSE | 1.229801 | FALSE | Photoreceptor          |
| TCACGGG db/m2  | db/m | 6146 | 0.060641 | FALSE | 1.06345  | FALSE | Endothelia Venous EC   |
| TCACGGG db/m2  | db/m | 1512 | 0.023266 | FALSE | 2.097975 | FALSE | Endothelia Aterial EC  |
| TCACTATC db/m2 | db/m | 1527 | 0.018422 | FALSE | 0.712322 | FALSE | Photoreceptor          |
| TCACTATC db/m2 | db/m | 2703 | 0.051646 | FALSE | 1.232334 | FALSE | Photoreceptor          |
| TCACTCGA db/m2 | db/m | 4911 | 0.020536 | FALSE | 0.976427 | FALSE | Endothelia Venous EC   |
| TCACTCGC db/m2 | db/m | 446  | 0.009712 | FALSE | 0.905231 | FALSE | Photoreceptor          |
| TCACTCGC db/m2 | db/m | 4685 | 0.014151 | FALSE | 1.082034 | FALSE | Endothelia Capillary E |
| TCAGCAA db/m2  | db/m | 5874 | 0.014429 | FALSE | 1.066985 | FALSE | Endothelia Aterial EC  |
| TCAGCAAC db/m2 | db/m | 514  | 0.034334 | FALSE | 2.727323 | FALSE | Endothelia Capillary E |
| TCAGCAAC db/m2 | db/m | 634  | 0.048732 | FALSE | 2.29597  | FALSE | Photoreceptor          |
| TCAGCAAC db/m2 | db/m | 2785 | 0.023266 | FALSE | 1.385434 | FALSE | Endothelia Capillary E |
| TCAGCAAT db/m2 | db/m | 3344 | 0.036891 | FALSE | 1.747079 | FALSE | Pericyte               |
| TCAGCCTA db/m2 | db/m | 434  | 0.019455 | FALSE | 1.977753 | FALSE | Muller cell            |
| TCAGCCTA db/m2 | db/m | 797  | 0.08663  | FALSE | 4.086171 | FALSE | Endothelia Aterial EC  |
| TCAGCCTA db/m2 | db/m | 715  | 0.025868 | FALSE | 2.135693 | FALSE | Microglia              |
| TCAGCCTC db/m2 | db/m | 418  | 0.010157 | FALSE | 1.548163 | FALSE | Photoreceptor          |
| TCAGCCTC db/m2 | db/m | 2591 | 0.006137 | FALSE | 1.564398 | FALSE | Photoreceptor          |
| TCAGCCTC db/m2 | db/m | 1863 | 0.021669 | FALSE | 1.385634 | FALSE | Endothelia Aterial EC  |
| TCAGGGC db/m2  | db/m | 472  | 0.024971 | FALSE | 34.57172 | TRUE  |                        |
| TCAGGGC db/m2  | db/m | 1535 | 0.046906 | FALSE | 1.252502 | FALSE | Photoreceptor          |
| TCAGGGC db/m2  | db/m | 971  | 0.055901 | FALSE | 1.402486 | FALSE | Photoreceptor          |
| TCAGGTA db/m2  | db/m | 679  | 0.053718 | FALSE | 4.127124 | FALSE | Muller cell            |
| TCAGGTA db/m2  | db/m | 943  | 0.08663  | FALSE | 2.937803 | FALSE | Muller cell            |
| TCAGGTA db/m2  | db/m | 368  | 0.029266 | FALSE | 28.17919 | TRUE  |                        |
| TCAGTCCC db/m2 | db/m | 987  | 0.03313  | FALSE | 2.932238 | FALSE | Muller cell            |
| TCAGTCCC db/m2 | db/m | 8713 | 0.038953 | FALSE | 0.747044 | FALSE | Photoreceptor          |
| TCAGTCCC db/m2 | db/m | 3378 | 0.016799 | FALSE | 1.208803 | FALSE | Endothelia Venous EC   |
| TCAGTGA db/m2  | db/m | 1200 | 0.071958 | FALSE | 7.021912 | TRUE  |                        |
| TCAGTTTC db/m2 | db/m | 426  | 0.070386 | FALSE | 4.528334 | FALSE | Muller cell            |
| TCAGTTTT db/m2 | db/m | 2423 | 0.017114 | FALSE | 1.486597 | FALSE | Endothelia Capillary E |
| TCAGTTTT db/m2 | db/m | 4634 | 0.046025 | FALSE | 1.495061 | FALSE | Photoreceptor          |
| TCATACTC db/m2 | db/m | 580  | 0.04192  | FALSE | 36.57442 | TRUE  |                        |
| TCATACTG db/m2 | db/m | 332  | 0.014711 | FALSE | 73.02021 | TRUE  |                        |
| TCATACTG db/m2 | db/m | 2280 | 0.067388 | FALSE | 0.884601 | FALSE | Photoreceptor          |
| TCATACTT db/m2 | db/m | 2561 | 0.060641 | FALSE | 1.089721 | FALSE | Photoreceptor          |
| TCATATCA db/m2 | db/m | 1246 | 0.100845 | TRUE  | 12.20876 | TRUE  |                        |
| TCATATCC db/m2 | db/m | 2915 | 0.013338 | FALSE | 1.224374 | FALSE | Photoreceptor          |
| TCATATCG db/m2 | db/m | 468  | 0.021286 | FALSE | 57.25562 | TRUE  |                        |
| TCATCATA db/m2 | db/m | 1079 | 0.088776 | FALSE | 1.931468 | FALSE | Photoreceptor          |
| TCATCATA db/m2 | db/m | 2113 | 0.065957 | FALSE | 3.557522 | FALSE | Muller cell            |

|                |      |      |          |       |          |       |                         |
|----------------|------|------|----------|-------|----------|-------|-------------------------|
| TCATCATC db/m2 | db/m | 9158 | 0.031411 | FALSE | 0.756559 | FALSE | Photoreceptor           |
| TCATCATC db/m2 | db/m | 368  | 0.035586 | FALSE | 3.217902 | FALSE | Microglia               |
| TCATCATG db/m2 | db/m | 403  | 0.138889 | TRUE  | 12.33108 | TRUE  |                         |
| TCATCATG db/m2 | db/m | 7141 | 0.044326 | FALSE | 1.103728 | FALSE | Photoreceptor           |
| TCATCATG db/m2 | db/m | 1025 | 0.064568 | FALSE | 3.289887 | FALSE | Muller cell             |
| TCATCATT db/m2 | db/m | 645  | 0.020536 | FALSE | 35.33835 | TRUE  |                         |
| TCATCATT db/m2 | db/m | 448  | 0.060641 | FALSE | 3.879228 | FALSE | Muller cell             |
| TCATCCGC db/m2 | db/m | 868  | 0.023266 | FALSE | 3.786518 | FALSE | Muller cell             |
| TCATCCGC db/m2 | db/m | 966  | 0.031973 | FALSE | 1.384242 | FALSE | Photoreceptor           |
| TCATCCGC db/m2 | db/m | 2839 | 0.028754 | FALSE | 2.452984 | FALSE | Pericyte                |
| TCATGAG db/m2  | db/m | 717  | 0.029787 | FALSE | 3.857218 | FALSE | Muller cell             |
| TCATGAG db/m2  | db/m | 5293 | 0.052669 | FALSE | 1.651045 | FALSE | Photoreceptor           |
| TCATGCCA db/m2 | db/m | 3797 | 0.043505 | FALSE | 1.082087 | FALSE | Photoreceptor           |
| TCATGCCC db/m2 | db/m | 1438 | 0.009493 | FALSE | 2.037195 | FALSE | Endothelia Capillary EC |
| TCATGCCC db/m2 | db/m | 455  | 0.046906 | FALSE | 4.180277 | FALSE | Pericyte                |
| TCATGGA db/m2  | db/m | 427  | 0.036232 | FALSE | 2.939627 | FALSE | Photoreceptor           |
| TCATGGA db/m2  | db/m | 1321 | 0.04192  | FALSE | 1.50064  | FALSE | Photoreceptor           |
| TCATGGA db/m2  | db/m | 8617 | 0.057037 | FALSE | 1.013292 | FALSE | Photoreceptor           |
| TCATGGA db/m2  | db/m | 4666 | 0.008032 | FALSE | 1.333997 | FALSE | Photoreceptor           |
| TCATGGA db/m2  | db/m | 499  | 0.035586 | FALSE | 0.434102 | FALSE | Photoreceptor           |
| TCATGGA db/m2  | db/m | 5529 | 0.047807 | FALSE | 1.164066 | FALSE | Photoreceptor           |
| TCATGTTA db/m2 | db/m | 2032 | 0.024105 | FALSE | 1.347964 | FALSE | Endothelia Aterial EC   |
| TCATGTTA db/m2 | db/m | 774  | 0.009063 | FALSE | 0.859516 | FALSE | Photoreceptor           |
| TCATGTTG db/m2 | db/m | 1793 | 0.019455 | FALSE | 0.580152 | FALSE | Photoreceptor           |
| TCATTACA db/m2 | db/m | 1184 | 0.031411 | FALSE | 2.077281 | FALSE | Muller cell             |
| TCATTACT db/m2 | db/m | 1205 | 0.036232 | FALSE | 1.918043 | FALSE | Endothelia Capillary EC |
| TCATTCAA db/m2 | db/m | 1407 | 0.049679 | FALSE | 2.132247 | FALSE | Muller cell             |
| TCATTCAC db/m2 | db/m | 1038 | 0.032546 | FALSE | 2.350526 | FALSE | Endothelia Capillary EC |
| TCATTCAT db/m2 | db/m | 9073 | 0.019455 | FALSE | 0.711338 | FALSE | Photoreceptor           |
| TCCACCAA db/m2 | db/m | 5488 | 0.027273 | FALSE | 1.258432 | FALSE | Endothelia Venous EC    |
| TCCACCAC db/m2 | db/m | 5796 | 0.034954 | FALSE | 1.14528  | FALSE | Endothelia Venous EC    |
| TCCAGAA db/m2  | db/m | 1878 | 0.015581 | FALSE | 0.267508 | FALSE | Photoreceptor           |
| TCCAGAA db/m2  | db/m | 1704 | 0.044326 | FALSE | 1.466325 | FALSE | Photoreceptor           |
| TCCAGAA db/m2  | db/m | 8740 | 0.028251 | FALSE | 0.90744  | FALSE | Photoreceptor           |
| TCCAGAA db/m2  | db/m | 1782 | 0.052669 | FALSE | 1.279018 | FALSE | Photoreceptor           |
| TCCAGAA db/m2  | db/m | 513  | 0.038953 | FALSE | 0.565006 | FALSE | Photoreceptor           |
| TCCATCGA db/m2 | db/m | 833  | 0.037564 | FALSE | 2.730644 | FALSE | Endothelia Capillary EC |
| TCCATCGA db/m2 | db/m | 414  | 0.053718 | FALSE | 49.44049 | TRUE  |                         |
| TCCATCGA db/m2 | db/m | 383  | 0.036232 | FALSE | 38.57143 | TRUE  |                         |
| TCCATCGC db/m2 | db/m | 1743 | 0.013074 | FALSE | 1.206064 | FALSE | Photoreceptor           |
| TCCATCGC db/m2 | db/m | 1576 | 0.044326 | FALSE | 1.889156 | FALSE | Photoreceptor           |
| TCCATGCA db/m2 | db/m | 1461 | 0.059406 | FALSE | 19.62145 | TRUE  |                         |
| TCCATGCC db/m2 | db/m | 718  | 0.052669 | FALSE | 3.890664 | FALSE | Muller cell             |
| TCCATGCT db/m2 | db/m | 3002 | 0.022455 | FALSE | 0.945687 | FALSE | Photoreceptor           |
| TCCCACAA db/m2 | db/m | 542  | 0.112477 | TRUE  | 14.65863 | TRUE  |                         |
| TCCCACAG db/m2 | db/m | 536  | 0.038953 | FALSE | 25.23734 | TRUE  |                         |
| TCCCAGTA db/m2 | db/m | 831  | 0.034334 | FALSE | 50.07542 | TRUE  |                         |

|                |      |       |          |       |          |       |                        |
|----------------|------|-------|----------|-------|----------|-------|------------------------|
| TCCCAGTA db/m2 | db/m | 3927  | 0.014429 | FALSE | 1.324078 | FALSE | Endothelia Capillary E |
| TCCCAGTC db/m2 | db/m | 2189  | 0.046906 | FALSE | 1.206781 | FALSE | Photoreceptor          |
| TCCCAGTT db/m2 | db/m | 579   | 0.009933 | FALSE | 55.74187 | TRUE  |                        |
| TCCCATGC db/m2 | db/m | 3882  | 0.064568 | FALSE | 1.781698 | FALSE | Photoreceptor          |
| TCCCATGC db/m2 | db/m | 868   | 0.007249 | FALSE | 2.739572 | FALSE | Photoreceptor          |
| TCCCATGC db/m2 | db/m | 8204  | 0.026796 | FALSE | 0.956056 | FALSE | Photoreceptor          |
| TCCGAAAC db/m2 | db/m | 3257  | 0.018761 | FALSE | 1.653475 | FALSE | Photoreceptor          |
| TCCGAAAC db/m2 | db/m | 403   | 0.014711 | FALSE | 44.51977 | TRUE  |                        |
| TCCGAAAC db/m2 | db/m | 4161  | 0.014711 | FALSE | 1.38513  | FALSE | Photoreceptor          |
| TCCGGGAC db/m2 | db/m | 1925  | 0.013605 | FALSE | 1.667097 | FALSE | Photoreceptor          |
| TCCGGGAC db/m2 | db/m | 1560  | 0.030859 | FALSE | 1.065696 | FALSE | Photoreceptor          |
| TCCGGGAC db/m2 | db/m | 3501  | 0.038953 | FALSE | 1.518008 | FALSE | Photoreceptor          |
| TCCGTGTC db/m2 | db/m | 4663  | 0.053718 | FALSE | 1.265064 | FALSE | Endothelia Venous EC   |
| TCCGTGTC db/m2 | db/m | 220   | 0.009712 | FALSE | 76.81416 | TRUE  |                        |
| TCCTAATG db/m2 | db/m | 4816  | 0.046906 | FALSE | 1.008176 | FALSE | Endothelia Venous EC   |
| TCCTAATT db/m2 | db/m | 995   | 0.01981  | FALSE | 1.630111 | FALSE | Microglia              |
| TCCTAATT db/m2 | db/m | 377   | 0.106154 | TRUE  | 3.639241 | FALSE |                        |
| TCCTCCCC db/m2 | db/m | 1960  | 0.091004 | FALSE | 8.517035 | TRUE  |                        |
| TCCTCCCG db/m2 | db/m | 4176  | 0.067388 | FALSE | 2.830031 | FALSE | Neuron                 |
| TCCTCCCG db/m2 | db/m | 362   | 0.011081 | FALSE | 51.58102 | TRUE  |                        |
| TCCTCGAA db/m2 | db/m | 2052  | 0.027273 | FALSE | 1.365747 | FALSE | Endothelia Capillary E |
| TCCTCGAG db/m2 | db/m | 2532  | 0.058205 | FALSE | 0.975772 | FALSE | Photoreceptor          |
| TCCTCGAG db/m2 | db/m | 5408  | 0.051646 | FALSE | 0.853854 | FALSE | Photoreceptor          |
| TCCTCGAT db/m2 | db/m | 1706  | 0.011319 | FALSE | 1.509077 | FALSE | Endothelia Capillary E |
| TCCTCTTC db/m2 | db/m | 5020  | 0.031411 | FALSE | 1.272885 | FALSE | Photoreceptor          |
| TCCTCTTG db/m2 | db/m | 2504  | 0.023682 | FALSE | 1.467676 | FALSE | Endothelia Capillary E |
| TCCTCTTG db/m2 | db/m | 3881  | 0.012557 | FALSE | 1.067811 | FALSE | Photoreceptor          |
| TCCTCTTT db/m2 | db/m | 3843  | 0.015287 | FALSE | 1.524286 | FALSE | Photoreceptor          |
| TCCTGCAA db/m2 | db/m | 1314  | 0.015879 | FALSE | 0.284309 | FALSE | Photoreceptor          |
| TCCTGCAA db/m2 | db/m | 1691  | 0.029787 | FALSE | 1.792886 | FALSE | Photoreceptor          |
| TCCTGCAA db/m2 | db/m | 403   | 0.059406 | FALSE | 11.17216 | TRUE  |                        |
| TCCTGCAC db/m2 | db/m | 2004  | 0.036232 | FALSE | 1.525548 | FALSE | Photoreceptor          |
| TCCTGCAT db/m2 | db/m | 9686  | 0.041154 | FALSE | 0.660644 | FALSE | Photoreceptor          |
| TCCTTCTC db/m2 | db/m | 799   | 0.08663  | FALSE | 4.753449 | FALSE | Muller cell            |
| TCCTTCTG db/m2 | db/m | 3949  | 0.037564 | FALSE | 0.976953 | FALSE | Neuron                 |
| TCCTTCTG db/m2 | db/m | 470   | 0.047807 | FALSE | 34.27459 | TRUE  |                        |
| TCCTTCTG db/m2 | db/m | 338   | 0.015287 | FALSE | 61.63234 | TRUE  |                        |
| TCCTTTCA db/m2 | db/m | 570   | 0.093319 | FALSE | 23.27209 | TRUE  |                        |
| TCCTTTCC db/m2 | db/m | 10430 | 0.015581 | FALSE | 0.65435  | FALSE | Photoreceptor          |
| TCCTTTCC db/m2 | db/m | 859   | 0.03313  | FALSE | 4.234838 | FALSE | Neuron                 |
| TCGAACAC db/m2 | db/m | 5779  | 0.095727 | FALSE | 2.211118 | FALSE | Neuron                 |
| TCGAACAC db/m2 | db/m | 5768  | 0.020171 | FALSE | 0.989027 | FALSE | Photoreceptor          |
| TCGAACAC db/m2 | db/m | 2199  | 0.071958 | FALSE | 1.398718 | FALSE | Photoreceptor          |
| TCGAACAC db/m2 | db/m | 1384  | 0.032546 | FALSE | 1.892034 | FALSE | Endothelia Aterial EC  |
| TCGAAGTC db/m2 | db/m | 639   | 0.024105 | FALSE | 2.289761 | FALSE | Endothelia Capillary E |
| TCGAAGTC db/m2 | db/m | 508   | 0.016488 | FALSE | 1.655508 | FALSE | Endothelia Capillary E |
| TCGAAGTC db/m2 | db/m | 2146  | 0.010157 | FALSE | 1.124739 | FALSE | Pericyte               |

|                |      |      |          |       |          |       |                        |
|----------------|------|------|----------|-------|----------|-------|------------------------|
| TCGACCTC db/m2 | db/m | 6433 | 0.280108 | TRUE  | 4.506173 | FALSE |                        |
| TCGACCTT db/m2 | db/m | 459  | 0.030318 | FALSE | 51.38686 | TRUE  |                        |
| TCGACGG/ db/m2 | db/m | 3069 | 0.040404 | FALSE | 1.56464  | FALSE | Neuron                 |
| TCGACGG\ db/m2 | db/m | 388  | 0.032546 | FALSE | 1.542188 | FALSE | Photoreceptor          |
| TCGACGG\ db/m2 | db/m | 1489 | 0.033726 | FALSE | 1.847172 | FALSE | Endothelia Capillary E |
| TCGATTTT db/m2 | db/m | 1958 | 0.098234 | FALSE | 12.83711 | TRUE  |                        |
| TCGATTTT db/m2 | db/m | 502  | 0.010614 | FALSE | 0.811495 | FALSE | Muller cell            |
| TCGATTTT db/m2 | db/m | 2199 | 0.060641 | FALSE | 1.579348 | FALSE | Photoreceptor          |
| TCGACTA db/m2  | db/m | 1740 | 0.039671 | FALSE | 1.846753 | FALSE | Endothelia Capillary E |
| TCGACTA db/m2  | db/m | 418  | 0.040404 | FALSE | 4.753315 | FALSE | Muller cell            |
| TCGACTC db/m2  | db/m | 469  | 0.036232 | FALSE | 3.919135 | FALSE | Muller cell            |
| TCGACTG db/m2  | db/m | 5653 | 0.015581 | FALSE | 0.973799 | FALSE | Photoreceptor          |
| TCGCAGG/ db/m2 | db/m | 566  | 0.022455 | FALSE | 0.479094 | FALSE | Photoreceptor          |
| TCGCAGG( db/m2 | db/m | 917  | 0.008852 | FALSE | 0.190073 | FALSE | Photoreceptor          |
| TCGCAGG( db/m2 | db/m | 2793 | 0.016488 | FALSE | 0.783364 | FALSE | Photoreceptor          |
| TCGCTCAA db/m2 | db/m | 1763 | 0.030318 | FALSE | 2.439103 | FALSE | Photoreceptor          |
| TCGCTCAC db/m2 | db/m | 4587 | 0.022455 | FALSE | 0.994077 | FALSE | Endothelia Venous EC   |
| TCGCTCAC db/m2 | db/m | 2719 | 0.044326 | FALSE | 1.092931 | FALSE | Photoreceptor          |
| TCGCTCAC db/m2 | db/m | 462  | 0.031973 | FALSE | 4.076428 | FALSE | Muller cell            |
| TCGCTCAC db/m2 | db/m | 1257 | 0.053718 | FALSE | 2.753337 | FALSE | Neuron                 |
| TCGCTCAT db/m2 | db/m | 1959 | 0.656627 | TRUE  | 5.702247 | TRUE  |                        |
| TCGCTTGA db/m2 | db/m | 1204 | 0.007249 | FALSE | 1.369798 | FALSE | Endothelia Capillary E |
| TCGGATA/ db/m2 | db/m | 2157 | 0.006137 | FALSE | 1.304523 | FALSE | Pericyte               |
| TCGGATA/ db/m2 | db/m | 1147 | 0.024971 | FALSE | 3.879455 | FALSE | Muller cell            |
| TCGGATAC db/m2 | db/m | 3272 | 0.070386 | FALSE | 2.027847 | FALSE | Photoreceptor          |
| TCGGGCA\ db/m2 | db/m | 6343 | 0.031411 | FALSE | 0.948677 | FALSE | Endothelia Venous EC   |
| TCGGGTG/ db/m2 | db/m | 1016 | 0.043505 | FALSE | 3.293147 | FALSE | Endothelia Aterial EC  |
| TCGGGTG( db/m2 | db/m | 1065 | 0.067388 | FALSE | 1.377739 | FALSE | Photoreceptor          |
| TCGGGTG( db/m2 | db/m | 1831 | 0.045165 | FALSE | 0.741293 | FALSE | Photoreceptor          |
| TCGGGTG( db/m2 | db/m | 976  | 0.008644 | FALSE | 2.495602 | FALSE | Endothelia Capillary E |
| TCGGGTG( db/m2 | db/m | 9491 | 0.055901 | FALSE | 0.752447 | FALSE | Photoreceptor          |
| TCGGGTG\ db/m2 | db/m | 2357 | 0.017758 | FALSE | 1.861547 | FALSE | Endothelia Aterial EC  |
| TCGGTCTC db/m2 | db/m | 3916 | 0.125386 | TRUE  | 2.450593 | FALSE |                        |
| TCGGTCTT db/m2 | db/m | 1340 | 0.088776 | FALSE | 2.156491 | FALSE | Photoreceptor          |
| TCGGTCTT db/m2 | db/m | 8696 | 0.013876 | FALSE | 0.777216 | FALSE | Photoreceptor          |
| TCGGTCTT db/m2 | db/m | 5293 | 0.012052 | FALSE | 0.888493 | FALSE | Photoreceptor          |
| TCGTAGAC db/m2 | db/m | 671  | 0.010384 | FALSE | 0.679243 | FALSE | Pericyte               |
| TCGTAGAC db/m2 | db/m | 1602 | 0.058205 | FALSE | 1.881345 | FALSE | Endothelia Venous EC   |
| TCGTAGAC db/m2 | db/m | 661  | 0.037564 | FALSE | 1.446967 | FALSE | Photoreceptor          |
| TCGTAGAT db/m2 | db/m | 637  | 0.013876 | FALSE | 2.372058 | FALSE | Photoreceptor          |
| TCGTCCAA db/m2 | db/m | 828  | 0.034954 | FALSE | 1.080136 | FALSE | Photoreceptor          |
| TCGTCCAC db/m2 | db/m | 1528 | 0.052669 | FALSE | 1.33328  | FALSE | Photoreceptor          |
| TCGTGCTA db/m2 | db/m | 878  | 0.067388 | FALSE | 3.821372 | FALSE | Muller cell            |
| TCGTGCTA db/m2 | db/m | 5118 | 0.025416 | FALSE | 0.844461 | FALSE | Photoreceptor          |
| TCGTGCTC db/m2 | db/m | 842  | 0.049679 | FALSE | 19.31217 | TRUE  |                        |
| TCGTGCTG db/m2 | db/m | 564  | 0.078788 | FALSE | 4.796271 | FALSE | Muller cell            |
| TCGTGCTT db/m2 | db/m | 4139 | 0.039671 | FALSE | 1.134025 | FALSE | Photoreceptor          |

|          |       |      |      |          |       |          |       |                        |
|----------|-------|------|------|----------|-------|----------|-------|------------------------|
| TCGTGGG  | db/m2 | db/m | 4279 | 0.025416 | FALSE | 1.175282 | FALSE | Endothelia Venous EC   |
| TCTAACTA | db/m2 | db/m | 1969 | 0.588076 | TRUE  | 4.786281 | FALSE |                        |
| TCTAACTC | db/m2 | db/m | 1133 | 0.061912 | FALSE | 2.615043 | FALSE | Muller cell            |
| TCTAACTG | db/m2 | db/m | 2912 | 0.034954 | FALSE | 1.155217 | FALSE | Photoreceptor          |
| TCTACATA | db/m2 | db/m | 3076 | 0.048732 | FALSE | 10.8412  | TRUE  |                        |
| TCTACATA | db/m2 | db/m | 4100 | 0.027273 | FALSE | 1.093853 | FALSE | Photoreceptor          |
| TCTACATG | db/m2 | db/m | 2153 | 0.025416 | FALSE | 1.482034 | FALSE | Endothelia Aterial EC  |
| TCTACATT | db/m2 | db/m | 915  | 0.164835 | TRUE  | 20.54795 | TRUE  |                        |
| TCTACCGA | db/m2 | db/m | 6165 | 0.013074 | FALSE | 1.261748 | FALSE | Photoreceptor          |
| TCTACCGC | db/m2 | db/m | 547  | 0.012052 | FALSE | 50.67498 | TRUE  |                        |
| TCTACCGC | db/m2 | db/m | 756  | 0.040404 | FALSE | 3.292853 | FALSE | Muller cell            |
| TCTACCGC | db/m2 | db/m | 291  | 0.012303 | FALSE | 62.71885 | TRUE  |                        |
| TCTACCGC | db/m2 | db/m | 3639 | 0.047807 | FALSE | 1.286534 | FALSE | Endothelia Venous EC   |
| TCTACCGT | db/m2 | db/m | 3406 | 0.020171 | FALSE | 0.700264 | FALSE | Photoreceptor          |
| TCTATACG | db/m2 | db/m | 3648 | 0.014711 | FALSE | 1.43035  | FALSE | Endothelia Venous EC   |
| TCTATACG | db/m2 | db/m | 1801 | 0.016181 | FALSE | 0.887512 | FALSE | Endothelia Capillary E |
| TCTATCAA | db/m2 | db/m | 4819 | 0.016181 | FALSE | 1.231524 | FALSE | Photoreceptor          |
| TCTATCAA | db/m2 | db/m | 3063 | 0.039671 | FALSE | 1.589873 | FALSE | Photoreceptor          |
| TCTATCAG | db/m2 | db/m | 3621 | 0.038953 | FALSE | 0.951677 | FALSE | Photoreceptor          |
| TCTATCAG | db/m2 | db/m | 4279 | 0.011081 | FALSE | 1.440069 | FALSE | Photoreceptor          |
| TCTATCAT | db/m2 | db/m | 4294 | 0.020171 | FALSE | 1.872474 | FALSE | Neuron                 |
| TCTATCAT | db/m2 | db/m | 1315 | 0.012557 | FALSE | 3.159372 | FALSE | Muller cell            |
| TCTCACGC | db/m2 | db/m | 1446 | 0.026796 | FALSE | 1.327374 | FALSE | Photoreceptor          |
| TCTCACGC | db/m2 | db/m | 5154 | 0.019455 | FALSE | 1.157948 | FALSE | Endothelia Capillary E |
| TCTCAGCA | db/m2 | db/m | 1723 | 0.059406 | FALSE | 18.54771 | TRUE  |                        |
| TCTCAGCC | db/m2 | db/m | 203  | 0.019455 | FALSE | 68.35443 | TRUE  |                        |
| TCTCAGCT | db/m2 | db/m | 440  | 0.027758 | FALSE | 3.837751 | FALSE | Muller cell            |
| TCTCAGCT | db/m2 | db/m | 311  | 0.039671 | FALSE | 36.10108 | TRUE  |                        |
| TCTCCGAA | db/m2 | db/m | 412  | 0.039671 | FALSE | 41.31313 | TRUE  |                        |
| TCTCCGAA | db/m2 | db/m | 4036 | 0.011805 | FALSE | 1.75885  | FALSE | Photoreceptor          |
| TCTCCGAA | db/m2 | db/m | 526  | 0.012557 | FALSE | 44.9807  | TRUE  |                        |
| TCTCCGAA | db/m2 | db/m | 164  | 0.015287 | FALSE | 71.875   | TRUE  |                        |
| TCTCCGAC | db/m2 | db/m | 3724 | 0.038953 | FALSE | 1.171132 | FALSE | Endothelia Capillary E |
| TCTCCGAC | db/m2 | db/m | 826  | 0.028251 | FALSE | 0.827242 | FALSE | Photoreceptor          |
| TCTCCGAT | db/m2 | db/m | 1190 | 0.048732 | FALSE | 2.252923 | FALSE | Photoreceptor          |
| TCTCCGAT | db/m2 | db/m | 1154 | 0.022059 | FALSE | 0.397253 | FALSE | Photoreceptor          |
| TCTCTGGC | db/m2 | db/m | 5528 | 0.025868 | FALSE | 1.167161 | FALSE | Endothelia Venous EC   |
| TCTCTGGC | db/m2 | db/m | 6379 | 0.033726 | FALSE | 1.000898 | FALSE | Photoreceptor          |
| TCTGCCAC | db/m2 | db/m | 519  | 0.091004 | FALSE | 1.925969 | FALSE | Photoreceptor          |
| TCTGCCAC | db/m2 | db/m | 1829 | 0.025416 | FALSE | 0.795884 | FALSE | Photoreceptor          |
| TCTGCCAC | db/m2 | db/m | 1761 | 0.013338 | FALSE | 1.175216 | FALSE | Endothelia Capillary E |
| TCTGCCAT | db/m2 | db/m | 1921 | 0.047807 | FALSE | 1.991872 | FALSE | Endothelia Capillary E |
| TCTGGCTG | db/m2 | db/m | 8140 | 0.012814 | FALSE | 0.756198 | FALSE | Photoreceptor          |
| TCTGGCTT | db/m2 | db/m | 716  | 0.143501 | TRUE  | 27.05411 | TRUE  |                        |
| TCTGGCTT | db/m2 | db/m | 503  | 0.064568 | FALSE | 0.919812 | FALSE | Photoreceptor          |
| TCTGTCGA | db/m2 | db/m | 1065 | 0.042704 | FALSE | 2.969841 | FALSE | Photoreceptor          |
| TCTGTCGT | db/m2 | db/m | 346  | 0.010614 | FALSE | 61.83266 | TRUE  |                        |



|                |      |      |          |       |          |       |                        |
|----------------|------|------|----------|-------|----------|-------|------------------------|
| TCTGTCGT db/m2 | db/m | 590  | 0.011081 | FALSE | 1.215557 | FALSE | Photoreceptor          |
| TCTTAGTC db/m2 | db/m | 1676 | 0.007249 | FALSE | 2.076901 | FALSE | Endothelia Capillary E |
| TCTTAGTC db/m2 | db/m | 2453 | 0.019455 | FALSE | 1.056808 | FALSE | Photoreceptor          |
| TCTTAGTG db/m2 | db/m | 949  | 0.064568 | FALSE | 4.365437 | FALSE | Photoreceptor          |
| TCTTAGTT db/m2 | db/m | 2215 | 0.005435 | FALSE | 1.175503 | FALSE | Pericyte               |
| TCTTCCTA db/m2 | db/m | 1313 | 0.095727 | FALSE | 2.005233 | FALSE | Endothelia Venous EC   |
| TCTTCCTA db/m2 | db/m | 1316 | 0.029787 | FALSE | 2.15764  | FALSE | Endothelia Capillary E |
| TCTTCCTC db/m2 | db/m | 933  | 0.017114 | FALSE | 3.808722 | FALSE | Muller cell            |
| TCTTCCTT db/m2 | db/m | 442  | 0.106408 | TRUE  | 25.4088  | TRUE  |                        |
| TCTTGCGA db/m2 | db/m | 531  | 0.037564 | FALSE | 37.22127 | TRUE  |                        |
| TCTTTGAA db/m2 | db/m | 296  | 0.078788 | FALSE | 23.13883 | TRUE  |                        |
| TCTTTGAA db/m2 | db/m | 7913 | 0.016799 | FALSE | 0.718081 | FALSE | Photoreceptor          |
| TCTTTGAC db/m2 | db/m | 7364 | 0.016799 | FALSE | 0.740745 | FALSE | Photoreceptor          |
| TGAACGTI db/m2 | db/m | 5369 | 0.034334 | FALSE | 1.1164   | FALSE | Photoreceptor          |
| TGAATCGC db/m2 | db/m | 683  | 0.024971 | FALSE | 2.042095 | FALSE | Photoreceptor          |
| TGAATCGC db/m2 | db/m | 3582 | 0.047807 | FALSE | 1.776232 | FALSE | Photoreceptor          |
| TGAATCGI db/m2 | db/m | 446  | 0.025868 | FALSE | 3.004121 | FALSE | Muller cell            |
| TGAATGCC db/m2 | db/m | 2265 | 0.070386 | FALSE | 10.16252 | TRUE  |                        |
| TGAATGCC db/m2 | db/m | 225  | 0.012557 | FALSE | 68.74305 | TRUE  |                        |
| TGAATGCC db/m2 | db/m | 603  | 0.033726 | FALSE | 0.854919 | FALSE | Photoreceptor          |
| TGACCCTA db/m2 | db/m | 2539 | 0.053718 | FALSE | 1.3226   | FALSE | Photoreceptor          |
| TGACCCTC db/m2 | db/m | 1304 | 0.042704 | FALSE | 2.070114 | FALSE | Photoreceptor          |
| TGACCCTG db/m2 | db/m | 888  | 0.04192  | FALSE | 18.6964  | TRUE  |                        |
| TGACGCG/ db/m2 | db/m | 444  | 0.061912 | FALSE | 2.139096 | FALSE | Microglia              |
| TGACGCG/ db/m2 | db/m | 2470 | 0.019455 | FALSE | 1.902594 | FALSE | Endothelia Capillary E |
| TGACGCG( db/m2 | db/m | 4573 | 0.075259 | FALSE | 1.849021 | FALSE | Neuron                 |
| TGACGCGI db/m2 | db/m | 2073 | 0.009933 | FALSE | 0.859828 | FALSE | Photoreceptor          |
| TGACGCGI db/m2 | db/m | 1635 | 0.063221 | FALSE | 1.576663 | FALSE | Photoreceptor          |
| TGACGCGI db/m2 | db/m | 8872 | 0.012814 | FALSE | 0.407606 | FALSE | Photoreceptor          |
| TGACTCCT db/m2 | db/m | 402  | 0.058205 | FALSE | 34.94282 | TRUE  |                        |
| TGAGACT/ db/m2 | db/m | 637  | 0.013074 | FALSE | 50.78341 | TRUE  |                        |
| TGAGACT/ db/m2 | db/m | 4475 | 0.073582 | FALSE | 2.084678 | FALSE | Neuron                 |
| TGAGACT( db/m2 | db/m | 3306 | 0.01981  | FALSE | 0.933635 | FALSE | Endothelia Capillary E |
| TGAGACT( db/m2 | db/m | 3039 | 0.022857 | FALSE | 1.253294 | FALSE | Endothelia Aterial EC  |
| TGAGACT( db/m2 | db/m | 6074 | 0.023266 | FALSE | 1.009608 | FALSE | Endothelia Capillary E |
| TGAGCAT( db/m2 | db/m | 9010 | 0.015287 | FALSE | 0.703363 | FALSE | Photoreceptor          |
| TGAGCAT( db/m2 | db/m | 572  | 0.084562 | FALSE | 37.56839 | TRUE  |                        |
| TGAGCATI db/m2 | db/m | 755  | 0.012303 | FALSE | 47.37064 | TRUE  |                        |
| TGAGCGC/ db/m2 | db/m | 1768 | 0.057037 | FALSE | 1.203719 | FALSE | Photoreceptor          |
| TGAGCGC/ db/m2 | db/m | 3110 | 0.008644 | FALSE | 1.518701 | FALSE | Photoreceptor          |
| TGAGCGC/ db/m2 | db/m | 467  | 0.036232 | FALSE | 1.83294  | FALSE | Photoreceptor          |
| TGAGCGC/ db/m2 | db/m | 1361 | 0.034954 | FALSE | 2.290359 | FALSE | Photoreceptor          |
| TGAGCGC/ db/m2 | db/m | 2142 | 0.057037 | FALSE | 1.316881 | FALSE | Photoreceptor          |
| TGAGCGC( db/m2 | db/m | 7829 | 0.031973 | FALSE | 0.95864  | FALSE | Photoreceptor          |
| TGAGCGC( db/m2 | db/m | 1749 | 0.078788 | FALSE | 1.140441 | FALSE | Photoreceptor          |
| TGAGCGC( db/m2 | db/m | 476  | 0.032546 | FALSE | 26.5074  | TRUE  |                        |
| TGAGGAG db/m2  | db/m | 7042 | 0.045165 | FALSE | 0.887094 | FALSE | Photoreceptor          |

|                |      |      |          |       |          |       |                        |
|----------------|------|------|----------|-------|----------|-------|------------------------|
| TGAGGAG↓ db/m2 | db/m | 5690 | 0.071958 | FALSE | 1.560553 | FALSE | Neuron                 |
| TGAGGAG↓ db/m2 | db/m | 7064 | 0.011561 | FALSE | 1.081415 | FALSE | Photoreceptor          |
| TGAGGAG↓ db/m2 | db/m | 538  | 0.064568 | FALSE | 40.14599 | TRUE  |                        |
| TGAGGAG↓ db/m2 | db/m | 7054 | 0.029787 | FALSE | 1.32914  | FALSE | Photoreceptor          |
| TGAGGGA↓ db/m2 | db/m | 3801 | 0.082569 | FALSE | 1.563444 | FALSE | Photoreceptor          |
| TGAGGGA↓ db/m2 | db/m | 402  | 0.012303 | FALSE | 53.20566 | TRUE  |                        |
| TGAGGGA↓ db/m2 | db/m | 7985 | 0.016799 | FALSE | 0.783733 | FALSE | Photoreceptor          |
| TGAGGTT↓ db/m2 | db/m | 208  | 0.009712 | FALSE | 71.70676 | TRUE  |                        |
| TGAGTCA↓ db/m2 | db/m | 433  | 0.063221 | FALSE | 36.42943 | TRUE  |                        |
| TGAGTCA↓ db/m2 | db/m | 5976 | 0.023266 | FALSE | 0.95079  | FALSE | Photoreceptor          |
| TGAGTCA↓ db/m2 | db/m | 3560 | 0.006137 | FALSE | 1.400824 | FALSE | Neuron                 |
| TGAGTCA↓ db/m2 | db/m | 627  | 0.010614 | FALSE | 0.286133 | FALSE | Photoreceptor          |
| TGATCAG↓ db/m2 | db/m | 8504 | 0.021286 | FALSE | 0.893269 | FALSE | Photoreceptor          |
| TGATCTTA db/m2 | db/m | 9733 | 0.046025 | FALSE | 0.633647 | FALSE | Photoreceptor          |
| TGATCTTC db/m2 | db/m | 5171 | 0.028251 | FALSE | 0.891676 | FALSE | Photoreceptor          |
| TGATCTTG db/m2 | db/m | 448  | 0.031973 | FALSE | 4.931184 | FALSE | Photoreceptor          |
| TGATCTTT db/m2 | db/m | 8799 | 0.024534 | FALSE | 0.834133 | FALSE | Photoreceptor          |
| TGATGCAC db/m2 | db/m | 3370 | 0.004598 | FALSE | 0.929916 | FALSE | Neuron                 |
| TGATTCTT db/m2 | db/m | 1282 | 0.024534 | FALSE | 1.449809 | FALSE | Photoreceptor          |
| TGATTTCC db/m2 | db/m | 1067 | 0.068864 | FALSE | 3.787541 | FALSE | Muller cell            |
| TGATTTCT db/m2 | db/m | 3573 | 0.038953 | FALSE | 1.4644   | FALSE | Endothelia Capillary E |
| TGCACGG↓ db/m2 | db/m | 759  | 0.106408 | TRUE  | 4.922067 | FALSE |                        |
| TGCACGG↓ db/m2 | db/m | 4342 | 0.031973 | FALSE | 1.102229 | FALSE | Endothelia Capillary E |
| TGCACGG↓ db/m2 | db/m | 9581 | 0.067388 | FALSE | 0.631619 | FALSE | Photoreceptor          |
| TGCACGG↓ db/m2 | db/m | 716  | 0.064568 | FALSE | 4.99275  | FALSE | Muller cell            |
| TGCACGG↓ db/m2 | db/m | 713  | 0.012814 | FALSE | 0.126107 | FALSE | Photoreceptor          |
| TGCACGG↓ db/m2 | db/m | 839  | 0.040404 | FALSE | 40.69661 | TRUE  |                        |
| TGCACGG↓ db/m2 | db/m | 165  | 0.012052 | FALSE | 73.35858 | TRUE  |                        |
| TGCACGG↓ db/m2 | db/m | 1160 | 0.029266 | FALSE | 1.896168 | FALSE | Photoreceptor          |
| TGCAGAT↓ db/m2 | db/m | 686  | 0.063221 | FALSE | 2.298362 | FALSE | Photoreceptor          |
| TGCAGAT↓ db/m2 | db/m | 5204 | 0.015581 | FALSE | 1.011744 | FALSE | Endothelia Capillary E |
| TGCAGAT↓ db/m2 | db/m | 1088 | 0.054795 | FALSE | 0.989502 | FALSE | Photoreceptor          |
| TGCAGATT db/m2 | db/m | 826  | 0.046025 | FALSE | 1.857873 | FALSE | Photoreceptor          |
| TGCAGATT db/m2 | db/m | 8502 | 0.023682 | FALSE | 0.564579 | FALSE | Photoreceptor          |
| TGCAGTA↓ db/m2 | db/m | 6338 | 0.033726 | FALSE | 1.217436 | FALSE | Photoreceptor          |
| TGCAGTA↓ db/m2 | db/m | 478  | 0.024534 | FALSE | 58.9033  | TRUE  |                        |
| TGCAGTAC db/m2 | db/m | 595  | 0.03313  | FALSE | 2.81061  | FALSE | Muller cell            |
| TGCAGTAC db/m2 | db/m | 1298 | 0.015879 | FALSE | 1.487685 | FALSE | Endothelia Aterial EC  |
| TGCATCCA db/m2 | db/m | 1196 | 0.041154 | FALSE | 1.325745 | FALSE | Photoreceptor          |
| TGCATCCA db/m2 | db/m | 1252 | 0.070386 | FALSE | 2.118462 | FALSE | Endothelia Capillary E |
| TGCATCCC db/m2 | db/m | 705  | 0.009063 | FALSE | 65.10168 | TRUE  |                        |
| TGCATGA↓ db/m2 | db/m | 2716 | 0.048732 | FALSE | 1.791003 | FALSE | Photoreceptor          |
| TGCATGA↓ db/m2 | db/m | 834  | 0.022059 | FALSE | 35.53078 | TRUE  |                        |
| TGCATGAC db/m2 | db/m | 1523 | 0.023682 | FALSE | 2.178447 | FALSE | Neuron                 |
| TGCCGAG↓ db/m2 | db/m | 1236 | 0.020908 | FALSE | 0.524151 | FALSE | Photoreceptor          |
| TGCCGAG↓ db/m2 | db/m | 6620 | 0.03313  | FALSE | 0.924997 | FALSE | Photoreceptor          |
| TGCCGAG↓ db/m2 | db/m | 3861 | 0.038953 | FALSE | 1.510627 | FALSE | Photoreceptor          |

|                |      |       |          |       |          |       |                        |
|----------------|------|-------|----------|-------|----------|-------|------------------------|
| TGCCGAGT db/m2 | db/m | 6507  | 0.031973 | FALSE | 1.144642 | FALSE | Endothelia Venous EC   |
| TGCGACGT db/m2 | db/m | 765   | 0.016488 | FALSE | 0.805229 | FALSE | Photoreceptor          |
| TGCGATAT db/m2 | db/m | 2466  | 0.065957 | FALSE | 24.56543 | TRUE  |                        |
| TGCGGCA/ db/m2 | db/m | 2041  | 0.036891 | FALSE | 0.489557 | FALSE | Photoreceptor          |
| TGCGGCA/ db/m2 | db/m | 406   | 0.009712 | FALSE | 56.70782 | TRUE  |                        |
| TGCGGCAT db/m2 | db/m | 3449  | 0.084562 | FALSE | 1.39494  | FALSE | Neuron                 |
| TGCGGCAT db/m2 | db/m | 3022  | 0.012052 | FALSE | 1.112676 | FALSE | Endothelia Venous EC   |
| TGCGGGT/ db/m2 | db/m | 512   | 0.028754 | FALSE | 3.938732 | FALSE | Muller cell            |
| TGCGGGT/ db/m2 | db/m | 317   | 0.022059 | FALSE | 42.2427  | TRUE  |                        |
| TGCTCCAC db/m2 | db/m | 508   | 0.029266 | FALSE | 4.898911 | FALSE | Muller cell            |
| TGCTCCAC db/m2 | db/m | 379   | 0.013876 | FALSE | 64.54918 | TRUE  |                        |
| TGCTCCAG db/m2 | db/m | 1685  | 0.010846 | FALSE | 1.483463 | FALSE | Endothelia Capillary E |
| TGCTGAAC db/m2 | db/m | 558   | 0.070386 | FALSE | 36.08965 | TRUE  |                        |
| TGCTGAAC db/m2 | db/m | 2963  | 0.024971 | FALSE | 1.571971 | FALSE | Neuron                 |
| TGCTGAAC db/m2 | db/m | 3381  | 0.016799 | FALSE | 1.158944 | FALSE | Endothelia Venous EC   |
| TGCTGAAC db/m2 | db/m | 2593  | 0.05065  | FALSE | 1.620858 | FALSE | Photoreceptor          |
| TGCTGAAC db/m2 | db/m | 566   | 0.022857 | FALSE | 3.589808 | FALSE | Muller cell            |
| TGCTGAAC db/m2 | db/m | 1111  | 0.034334 | FALSE | 2.460205 | FALSE | Photoreceptor          |
| TGCTTCGT db/m2 | db/m | 4471  | 0.030318 | FALSE | 1.022046 | FALSE | Neuron                 |
| TGCTTGCT db/m2 | db/m | 10286 | 0.020171 | FALSE | 0.844658 | FALSE | Photoreceptor          |
| TGGAACT/ db/m2 | db/m | 2532  | 0.049679 | FALSE | 2.004353 | FALSE | Photoreceptor          |
| TGGAACTC db/m2 | db/m | 1024  | 0.027758 | FALSE | 0.712872 | FALSE | Photoreceptor          |
| TGGAACTC db/m2 | db/m | 2347  | 0.041154 | FALSE | 1.335832 | FALSE | Photoreceptor          |
| TGGAGGA/ db/m2 | db/m | 1415  | 0.091004 | FALSE | 14.74848 | TRUE  |                        |
| TGGAGGA/ db/m2 | db/m | 650   | 0.047807 | FALSE | 43.72497 | TRUE  |                        |
| TGGAGGA/ db/m2 | db/m | 4338  | 0.015581 | FALSE | 0.295759 | FALSE | Photoreceptor          |
| TGGAGGA/ db/m2 | db/m | 4193  | 0.010846 | FALSE | 1.119383 | FALSE | Photoreceptor          |
| TGGAGGA/ db/m2 | db/m | 4923  | 0.034334 | FALSE | 1.138519 | FALSE | Endothelia Venous EC   |
| TGGATCAC db/m2 | db/m | 422   | 0.011561 | FALSE | 46.25592 | TRUE  |                        |
| TGGATCAC db/m2 | db/m | 8208  | 0.119124 | TRUE  | 3.302448 | FALSE |                        |
| TGGATCAC db/m2 | db/m | 550   | 0.200401 | TRUE  | 11.91589 | TRUE  |                        |
| TGGATCAT db/m2 | db/m | 537   | 0.020171 | FALSE | 2.486979 | FALSE | Photoreceptor          |
| TGGATGT/ db/m2 | db/m | 2813  | 0.008438 | FALSE | 1.55015  | FALSE | Neuron                 |
| TGGATGTI db/m2 | db/m | 1097  | 0.020536 | FALSE | 2.318725 | FALSE | Photoreceptor          |
| TGGATGTI db/m2 | db/m | 3379  | 0.020908 | FALSE | 1.115558 | FALSE | Endothelia Capillary E |
| TGGCGTG/ db/m2 | db/m | 6145  | 0.013876 | FALSE | 0.995146 | FALSE | Photoreceptor          |
| TGGCGTG( db/m2 | db/m | 312   | 0.03313  | FALSE | 35.23132 | TRUE  |                        |
| TGGCGTG( db/m2 | db/m | 5270  | 0.01981  | FALSE | 0.909941 | FALSE | Photoreceptor          |
| TGGCGTGI db/m2 | db/m | 480   | 0.078788 | FALSE | 4.334663 | FALSE | Muller cell            |
| TGGGAAG/ db/m2 | db/m | 480   | 0.019455 | FALSE | 4.740808 | FALSE | Muller cell            |
| TGGGAGA/ db/m2 | db/m | 1037  | 0.065957 | FALSE | 24.94369 | TRUE  |                        |
| TGGGATT( db/m2 | db/m | 4015  | 0.049679 | FALSE | 11.85998 | TRUE  |                        |
| TGGGATT( db/m2 | db/m | 330   | 0.071958 | FALSE | 16.97248 | TRUE  |                        |
| TGGGATTI db/m2 | db/m | 1028  | 0.03313  | FALSE | 4.922919 | FALSE | Muller cell            |
| TGGGCGT/ db/m2 | db/m | 2156  | 0.015581 | FALSE | 1.368907 | FALSE | Endothelia Capillary E |
| TGGGCTG/ db/m2 | db/m | 2158  | 0.034334 | FALSE | 1.810035 | FALSE | Photoreceptor          |
| TGGGCTG( db/m2 | db/m | 753   | 0.334395 | TRUE  | 12.4105  | TRUE  |                        |

|                |      |      |          |       |          |       |                        |
|----------------|------|------|----------|-------|----------|-------|------------------------|
| TGGGCTG(db/m2  | db/m | 1919 | 0.025868 | FALSE | 1.323245 | FALSE | Endothelia Capillary E |
| TGGGCTG(db/m2  | db/m | 1538 | 0.023266 | FALSE | 2.82723  | FALSE | Neuron                 |
| TGGGCTG(db/m2  | db/m | 407  | 0.05065  | FALSE | 4.09703  | FALSE | Photoreceptor          |
| TGGGTTA(db/m2  | db/m | 3671 | 0.022857 | FALSE | 1.059657 | FALSE | Photoreceptor          |
| TGGGTTA(db/m2  | db/m | 1108 | 0.030859 | FALSE | 3.332538 | FALSE | Muller cell            |
| TGGGTTA(db/m2  | db/m | 9842 | 0.012814 | FALSE | 0.646783 | FALSE | Photoreceptor          |
| TGGTACA(db/m2  | db/m | 2020 | 0.006499 | FALSE | 1.241025 | FALSE | Pericyte               |
| TGGTACA(db/m2  | db/m | 4821 | 0.027758 | FALSE | 1.216473 | FALSE | Endothelia Aterial EC  |
| TGGTAGT(db/m2  | db/m | 1232 | 0.004116 | FALSE | 2.372189 | FALSE | Pericyte               |
| TGGTAGT(db/m2  | db/m | 1018 | 0.022857 | FALSE | 1.517485 | FALSE | Photoreceptor          |
| TGGTAGT(db/m2  | db/m | 7680 | 0.020171 | FALSE | 0.811394 | FALSE | Photoreceptor          |
| TGGTAGT(db/m2  | db/m | 368  | 0.030318 | FALSE | 33.09456 | TRUE  |                        |
| TGGTGAT(db/m2  | db/m | 5284 | 0.013605 | FALSE | 0.596901 | FALSE | Photoreceptor          |
| TGGTGAT(db/m2  | db/m | 6448 | 0.044326 | FALSE | 1.194878 | FALSE | Photoreceptor          |
| TGGTGAT(db/m2  | db/m | 359  | 0.046025 | FALSE | 1.055254 | FALSE | Neuron                 |
| TGGTGAT(db/m2  | db/m | 651  | 0.021669 | FALSE | 0.828273 | FALSE | Photoreceptor          |
| TGGTTAG(db/m2  | db/m | 3472 | 0.010157 | FALSE | 1.352372 | FALSE | Photoreceptor          |
| TGGTTAG(db/m2  | db/m | 1295 | 0.012052 | FALSE | 0.734628 | FALSE | Photoreceptor          |
| TGGTTAG(db/m2  | db/m | 6547 | 0.012557 | FALSE | 0.990639 | FALSE | Photoreceptor          |
| TGGTTAGT(db/m2 | db/m | 3908 | 0.013876 | FALSE | 1.430393 | FALSE | Photoreceptor          |
| TGTAACGT(db/m2 | db/m | 423  | 0.051646 | FALSE | 2.590144 | FALSE | Photoreceptor          |
| TGTAACGT(db/m2 | db/m | 794  | 0.051646 | FALSE | 1.052001 | FALSE | Endothelia Capillary E |
| TGTAAGC(db/m2  | db/m | 3713 | 0.04192  | FALSE | 1.421413 | FALSE | Neuron                 |
| TGTAAGC(db/m2  | db/m | 3180 | 0.146004 | TRUE  | 4.302144 | FALSE |                        |
| TGTAAGCC(db/m2 | db/m | 3988 | 0.041154 | FALSE | 1.279886 | FALSE | Endothelia Capillary E |
| TGTAAGCT(db/m2 | db/m | 462  | 0.016181 | FALSE | 42.53215 | TRUE  |                        |
| TGTACAG(db/m2  | db/m | 1041 | 0.038953 | FALSE | 4.012756 | FALSE | Muller cell            |
| TGTACAGT(db/m2 | db/m | 762  | 0.015581 | FALSE | 0.553098 | FALSE | Photoreceptor          |
| TGTAGACC(db/m2 | db/m | 688  | 0.026796 | FALSE | 2.921743 | FALSE | Muller cell            |
| TGTAGACC(db/m2 | db/m | 3073 | 0.007249 | FALSE | 1.751363 | FALSE | Neuron                 |
| TGTAGACC(db/m2 | db/m | 916  | 0.076994 | FALSE | 1.202225 | FALSE | Photoreceptor          |
| TGTAGACC(db/m2 | db/m | 614  | 0.036232 | FALSE | 4.33862  | FALSE | Muller cell            |
| TGTAGACC(db/m2 | db/m | 2995 | 0.036232 | FALSE | 1.789383 | FALSE | Photoreceptor          |
| TGTCAGA(db/m2  | db/m | 2643 | 0.012557 | FALSE | 1.737547 | FALSE | Endothelia Capillary E |
| TGTCAGA(db/m2  | db/m | 441  | 0.016181 | FALSE | 30.86855 | TRUE  |                        |
| TGTCAGAC(db/m2 | db/m | 1374 | 0.009712 | FALSE | 1.262614 | FALSE | Endothelia Aterial EC  |
| TGTCAGAC(db/m2 | db/m | 1244 | 0.036232 | FALSE | 1.532962 | FALSE | Photoreceptor          |
| TGTCCACC(db/m2 | db/m | 5388 | 0.296296 | TRUE  | 12.82039 | TRUE  |                        |
| TGTCCACC(db/m2 | db/m | 387  | 0.031973 | FALSE | 2.869361 | FALSE | Muller cell            |
| TGTCCACC(db/m2 | db/m | 2182 | 0.060641 | FALSE | 23.14222 | TRUE  |                        |
| TGTCCACC(db/m2 | db/m | 3325 | 0.035586 | FALSE | 1.598279 | FALSE | Photoreceptor          |
| TGTCCACC(db/m2 | db/m | 1388 | 0.046906 | FALSE | 4.458273 | FALSE | Muller cell            |
| TGTCCCAA(db/m2 | db/m | 1822 | 0.014429 | FALSE | 1.047777 | FALSE | Photoreceptor          |
| TGTCCCAT(db/m2 | db/m | 589  | 0.015581 | FALSE | 0.155948 | FALSE | Photoreceptor          |
| TGTCCTGA(db/m2 | db/m | 699  | 0.084562 | FALSE | 1.192573 | FALSE | Photoreceptor          |
| TGTCCTGC(db/m2 | db/m | 459  | 0.030859 | FALSE | 2.952912 | FALSE | Endothelia Capillary E |
| TGTGAGT(db/m2  | db/m | 1535 | 0.037564 | FALSE | 1.427769 | FALSE | Photoreceptor          |

|                |      |      |          |       |          |       |                        |
|----------------|------|------|----------|-------|----------|-------|------------------------|
| TGTGATG/ db/m2 | db/m | 9038 | 0.015581 | FALSE | 0.700212 | FALSE | Photoreceptor          |
| TGTGATG( db/m2 | db/m | 256  | 0.043505 | FALSE | 1.242803 | FALSE | Muller cell            |
| TGTGATG  db/m2 | db/m | 1432 | 0.031973 | FALSE | 1.193014 | FALSE | Photoreceptor          |
| TGTGATG  db/m2 | db/m | 1314 | 0.019106 | FALSE | 1.776352 | FALSE | Photoreceptor          |
| TGTGCGG/ db/m2 | db/m | 472  | 0.023266 | FALSE | 0.45847  | FALSE | Pericyte               |
| TGTGCGG/ db/m2 | db/m | 8627 | 0.033726 | FALSE | 0.729846 | FALSE | Photoreceptor          |
| TGTGCGG( db/m2 | db/m | 760  | 0.010614 | FALSE | 45.85053 | TRUE  |                        |
| TGTGCGG( db/m2 | db/m | 512  | 0.091004 | FALSE | 3.286246 | FALSE | Photoreceptor          |
| TGTGCGG  db/m2 | db/m | 1236 | 0.047807 | FALSE | 2.321414 | FALSE | Photoreceptor          |
| TGTGCGG  db/m2 | db/m | 650  | 0.033726 | FALSE | 2.509152 | FALSE | Photoreceptor          |
| TGTGTGA( db/m2 | db/m | 4587 | 0.022059 | FALSE | 1.183873 | FALSE | Photoreceptor          |
| TGTTACTC db/m2 | db/m | 1207 | 0.013876 | FALSE | 0.553164 | FALSE | Photoreceptor          |
| TGTTCATA db/m2 | db/m | 2823 | 0.027273 | FALSE | 1.541939 | FALSE | Photoreceptor          |
| TGTTCATC db/m2 | db/m | 846  | 0.016181 | FALSE | 0.727224 | FALSE | Photoreceptor          |
| TGTTCCGA db/m2 | db/m | 605  | 0.031411 | FALSE | 33.5065  | TRUE  |                        |
| TGTTCCGC db/m2 | db/m | 3138 | 0.012557 | FALSE | 0.924138 | FALSE | Photoreceptor          |
| TGTTCCGC db/m2 | db/m | 3725 | 0.021669 | FALSE | 1.370806 | FALSE | Endothelia Capillary E |
| TGTTCCGC db/m2 | db/m | 9521 | 0.017434 | FALSE | 0.587145 | FALSE | Photoreceptor          |
| TGTTCCGT db/m2 | db/m | 3769 | 0.130259 | TRUE  | 2.197548 | FALSE |                        |
| TGTTCCGT db/m2 | db/m | 387  | 0.058205 | FALSE | 9.357798 | TRUE  |                        |
| TGTTCTAA db/m2 | db/m | 1987 | 0.029787 | FALSE | 1.27577  | FALSE | Photoreceptor          |
| TGTTCTAC db/m2 | db/m | 7976 | 0.020171 | FALSE | 0.355393 | FALSE | Photoreceptor          |
| TGTTCTAC db/m2 | db/m | 359  | 0.025868 | FALSE | 6.031128 | TRUE  |                        |
| TGTTCTAG db/m2 | db/m | 716  | 0.016488 | FALSE | 1.127924 | FALSE | Neuron                 |
| TGTTCTAG db/m2 | db/m | 686  | 0.05065  | FALSE | 40.7448  | TRUE  |                        |
| TGTTCTAG db/m2 | db/m | 1042 | 0.038953 | FALSE | 0.899198 | FALSE | Photoreceptor          |
| TGTTGAG( db/m2 | db/m | 7572 | 0.038251 | FALSE | 1.093165 | FALSE | Photoreceptor          |
| TGTTGAG( db/m2 | db/m | 6839 | 0.031973 | FALSE | 1.205988 | FALSE | Photoreceptor          |
| TGTTGAG  db/m2 | db/m | 151  | 0.011319 | FALSE | 76.9821  | TRUE  |                        |
| TGTTGGA/ db/m2 | db/m | 494  | 0.014997 | FALSE | 43.84615 | TRUE  |                        |
| TGTTGGA( db/m2 | db/m | 177  | 0.014997 | FALSE | 70.96336 | TRUE  |                        |
| TGTTGGA  db/m2 | db/m | 1333 | 0.038953 | FALSE | 3.045144 | FALSE | Muller cell            |
| TGTTTGTA db/m2 | db/m | 6084 | 0.020171 | FALSE | 1.079505 | FALSE | Endothelia Capillary E |
| TGTTTGTA db/m2 | db/m | 427  | 0.034334 | FALSE | 25.24272 | TRUE  |                        |
| TGTTTGTC db/m2 | db/m | 3202 | 0.028754 | FALSE | 1.379295 | FALSE | Photoreceptor          |
| TGTTTGTC db/m2 | db/m | 4873 | 0.026796 | FALSE | 1.326388 | FALSE | Endothelia Venous EC   |
| TGTTTGTT db/m2 | db/m | 1816 | 0.095727 | FALSE | 2.449586 | FALSE | Muller cell            |
| TTAATCCC db/m2 | db/m | 1881 | 0.164835 | TRUE  | 6.481928 | TRUE  |                        |
| TTAATCCG db/m2 | db/m | 2922 | 0.012557 | FALSE | 1.002667 | FALSE | Endothelia Capillary E |
| TTAATCCG db/m2 | db/m | 780  | 0.039671 | FALSE | 2.643259 | FALSE | Endothelia Capillary E |
| TTACAGG/ db/m2 | db/m | 2624 | 0.007833 | FALSE | 1.691679 | FALSE | Photoreceptor          |
| TTACAGG( db/m2 | db/m | 1399 | 0.043505 | FALSE | 1.934113 | FALSE | Photoreceptor          |
| TTACAGG( db/m2 | db/m | 1313 | 0.095727 | FALSE | 3.373186 | FALSE | Muller cell            |
| TTACAGG( db/m2 | db/m | 629  | 0.029787 | FALSE | 3.771446 | FALSE | Muller cell            |
| TTACCATA db/m2 | db/m | 3892 | 0.026328 | FALSE | 1.19616  | FALSE | Endothelia Capillary E |
| TTACCATA db/m2 | db/m | 417  | 0.009712 | FALSE | 53.58852 | TRUE  |                        |
| TTACCATG db/m2 | db/m | 8251 | 0.024534 | FALSE | 0.902579 | FALSE | Photoreceptor          |

|                |      |      |          |       |          |       |                        |
|----------------|------|------|----------|-------|----------|-------|------------------------|
| TTACCATG db/m2 | db/m | 2789 | 0.112477 | TRUE  | 7.18161  | TRUE  |                        |
| TTACCATG db/m2 | db/m | 449  | 0.026328 | FALSE | 2.621718 | FALSE | Endothelia Capillary E |
| TTACCATG db/m2 | db/m | 8114 | 0.036232 | FALSE | 0.661946 | FALSE | Photoreceptor          |
| TTACCGCA db/m2 | db/m | 219  | 0.014151 | FALSE | 68.61827 | TRUE  |                        |
| TTACCGCG db/m2 | db/m | 745  | 0.061912 | FALSE | 24.91583 | TRUE  |                        |
| TTACCGCG db/m2 | db/m | 1557 | 0.100845 | TRUE  | 5.117271 | TRUE  |                        |
| TTACCGCG db/m2 | db/m | 382  | 0.041154 | FALSE | 4.209044 | FALSE | Muller cell            |
| TTACCGCT db/m2 | db/m | 1459 | 0.054795 | FALSE | 4.111742 | FALSE | Muller cell            |
| TTACGCCA db/m2 | db/m | 6000 | 0.061912 | FALSE | 1.108708 | FALSE | Endothelia Venous EC   |
| TTACGCCA db/m2 | db/m | 1302 | 0.007636 | FALSE | 1.328816 | FALSE | Endothelia Capillary E |
| TTACGCCC db/m2 | db/m | 1234 | 0.031973 | FALSE | 1.921327 | FALSE | Photoreceptor          |
| TTACGCCC db/m2 | db/m | 598  | 0.028754 | FALSE | 2.473085 | FALSE | Muller cell            |
| TTACGCCC db/m2 | db/m | 533  | 0.028251 | FALSE | 2.00509  | FALSE | Microglia              |
| TTACGTTA db/m2 | db/m | 1046 | 0.035586 | FALSE | 43.86511 | TRUE  |                        |
| TTACTGTA db/m2 | db/m | 811  | 0.071958 | FALSE | 10.2459  | TRUE  |                        |
| TTACTGTG db/m2 | db/m | 1138 | 0.041154 | FALSE | 0.223319 | FALSE | Photoreceptor          |
| TTACTGTG db/m2 | db/m | 1682 | 0.040404 | FALSE | 1.998443 | FALSE | Photoreceptor          |
| TTAGGCA db/m2  | db/m | 503  | 0.043505 | FALSE | 28.68937 | TRUE  |                        |
| TTAGGGTA db/m2 | db/m | 516  | 0.028251 | FALSE | 3.562977 | FALSE | Muller cell            |
| TTAGGGTA db/m2 | db/m | 2839 | 0.071958 | FALSE | 1.331672 | FALSE | Photoreceptor          |
| TTAGGGTA db/m2 | db/m | 4488 | 0.027273 | FALSE | 1.477545 | FALSE | Photoreceptor          |
| TTAGTCTA db/m2 | db/m | 2063 | 0.046906 | FALSE | 0.987094 | FALSE | Photoreceptor          |
| TTAGTCTC db/m2 | db/m | 2254 | 0.046906 | FALSE | 3.31928  | FALSE | Muller cell            |
| TTAGTCTT db/m2 | db/m | 9093 | 0.021286 | FALSE | 0.360685 | FALSE | Photoreceptor          |
| TTATTGCA db/m2 | db/m | 4158 | 0.035586 | FALSE | 1.704887 | FALSE | Photoreceptor          |
| TTATTGCC db/m2 | db/m | 468  | 0.022455 | FALSE | 4.517225 | FALSE | Muller cell            |
| TTATTGCC db/m2 | db/m | 447  | 0.025868 | FALSE | 1.329637 | FALSE | Photoreceptor          |
| TTATTGCT db/m2 | db/m | 1297 | 0.012303 | FALSE | 2.235369 | FALSE | Photoreceptor          |
| TTCAATCC db/m2 | db/m | 1000 | 0.031973 | FALSE | 1.576536 | FALSE | Photoreceptor          |
| TTCACCGA db/m2 | db/m | 1938 | 0.038953 | FALSE | 0.968025 | FALSE | Photoreceptor          |
| TTCACCGA db/m2 | db/m | 396  | 0.119124 | TRUE  | 18.25397 | TRUE  |                        |
| TTCACCGC db/m2 | db/m | 2219 | 0.025868 | FALSE | 1.662604 | FALSE | Endothelia Capillary E |
| TTCACGCG db/m2 | db/m | 784  | 0.027273 | FALSE | 3.059587 | FALSE | Endothelia Capillary E |
| TTCAGGA db/m2  | db/m | 410  | 0.011081 | FALSE | 57.42315 | TRUE  |                        |
| TTCAGGA db/m2  | db/m | 498  | 0.036891 | FALSE | 4.206003 | FALSE | Muller cell            |
| TTCAGGAT db/m2 | db/m | 3686 | 0.008032 | FALSE | 1.35452  | FALSE | Neuron                 |
| TTCAGGAT db/m2 | db/m | 847  | 0.011561 | FALSE | 1.518118 | FALSE | Muller cell            |
| TTCATGTA db/m2 | db/m | 2303 | 0.013074 | FALSE | 1.118063 | FALSE | Photoreceptor          |
| TTCATGTC db/m2 | db/m | 6575 | 0.018761 | FALSE | 0.89374  | FALSE | Photoreceptor          |
| TTCATGTC db/m2 | db/m | 5035 | 0.008234 | FALSE | 1.259411 | FALSE | Photoreceptor          |
| TTCATTGC db/m2 | db/m | 1038 | 0.08663  | FALSE | 3.409733 | FALSE | Muller cell            |
| TTCATTGC db/m2 | db/m | 447  | 0.015287 | FALSE | 38.27411 | TRUE  |                        |
| TTCATTGT db/m2 | db/m | 8388 | 0.061912 | FALSE | 0.93754  | FALSE | Photoreceptor          |
| TTCCAATG db/m2 | db/m | 6260 | 0.030859 | FALSE | 0.945743 | FALSE | Photoreceptor          |
| TTCCAATG db/m2 | db/m | 2435 | 0.020536 | FALSE | 1.55912  | FALSE | Endothelia Capillary E |
| TTCCAATG db/m2 | db/m | 414  | 0.060641 | FALSE | 50       | TRUE  |                        |
| TTCCACGA db/m2 | db/m | 8085 | 0.038953 | FALSE | 0.803406 | FALSE | Photoreceptor          |

|                |      |       |          |       |          |       |                        |
|----------------|------|-------|----------|-------|----------|-------|------------------------|
| TTCCACGA db/m2 | db/m | 366   | 0.027273 | FALSE | 1.599403 | FALSE | Photoreceptor          |
| TTCCGGTC db/m2 | db/m | 1308  | 0.027758 | FALSE | 1.931045 | FALSE | Pericyte               |
| TTCCGGTC db/m2 | db/m | 514   | 0.020908 | FALSE | 42.49592 | TRUE  |                        |
| TTCCGGTT db/m2 | db/m | 433   | 0.026796 | FALSE | 1.160173 | FALSE | Pericyte               |
| TTCCGGTT db/m2 | db/m | 823   | 0.028754 | FALSE | 42.57469 | TRUE  |                        |
| TTCCGTGC db/m2 | db/m | 491   | 0.068864 | FALSE | 4.046706 | FALSE | Muller cell            |
| TTCCTAAA db/m2 | db/m | 3014  | 0.044326 | FALSE | 1.742302 | FALSE | Photoreceptor          |
| TTCCTAAC db/m2 | db/m | 860   | 0.015581 | FALSE | 2.148301 | FALSE | Pericyte               |
| TTCCTAAG db/m2 | db/m | 2586  | 0.119568 | TRUE  | 1.358944 | FALSE |                        |
| TTCCTAAG db/m2 | db/m | 1936  | 0.020908 | FALSE | 1.069487 | FALSE | Photoreceptor          |
| TTCCTCTA db/m2 | db/m | 3893  | 0.021669 | FALSE | 0.903345 | FALSE | Photoreceptor          |
| TTCCTCTA db/m2 | db/m | 3110  | 0.030859 | FALSE | 1.482128 | FALSE | Endothelia Venous EC   |
| TTCCTCTC db/m2 | db/m | 2642  | 0.078788 | FALSE | 1.935433 | FALSE | Photoreceptor          |
| TTCCTCTC db/m2 | db/m | 1019  | 0.091004 | FALSE | 0.555786 | FALSE | Photoreceptor          |
| TTCCTTCA db/m2 | db/m | 1139  | 0.019106 | FALSE | 0.649746 | FALSE | Photoreceptor          |
| TTCCTTCC db/m2 | db/m | 666   | 0.033726 | FALSE | 42.84222 | TRUE  |                        |
| TTCCTTCG db/m2 | db/m | 7331  | 0.01981  | FALSE | 0.73089  | FALSE | Photoreceptor          |
| TTCCTTCG db/m2 | db/m | 489   | 0.032546 | FALSE | 42.81818 | TRUE  |                        |
| TTCCTTCT db/m2 | db/m | 408   | 0.068864 | FALSE | 4.871993 | FALSE | Muller cell            |
| TTCCTTCT db/m2 | db/m | 1920  | 0.004116 | FALSE | 1.612372 | FALSE | Pericyte               |
| TTCGATTA db/m2 | db/m | 333   | 0.025868 | FALSE | 23.73541 | TRUE  |                        |
| TTCGATTA db/m2 | db/m | 576   | 0.051646 | FALSE | 3.649847 | FALSE | Muller cell            |
| TTCGCTGC db/m2 | db/m | 8239  | 0.038953 | FALSE | 1.17852  | FALSE | Photoreceptor          |
| TTCGCTGC db/m2 | db/m | 4140  | 0.046025 | FALSE | 1.444568 | FALSE | Endothelia Venous EC   |
| TTCGCTGT db/m2 | db/m | 331   | 0.030859 | FALSE | 47.19626 | TRUE  |                        |
| TTCGCTGT db/m2 | db/m | 602   | 0.042704 | FALSE | 2.511052 | FALSE | Photoreceptor          |
| TTCGGTCC db/m2 | db/m | 539   | 0.028754 | FALSE | 30.65279 | TRUE  |                        |
| TTCGGTCC db/m2 | db/m | 8651  | 0.033726 | FALSE | 0.991608 | FALSE | Photoreceptor          |
| TTCGGTCC db/m2 | db/m | 1565  | 0.049679 | FALSE | 1.919831 | FALSE | Photoreceptor          |
| TTCGGTCT db/m2 | db/m | 6894  | 0.023682 | FALSE | 0.904377 | FALSE | Photoreceptor          |
| TTCTAACA db/m2 | db/m | 587   | 0.112477 | TRUE  | 7.717042 | TRUE  |                        |
| TTCTAACC db/m2 | db/m | 507   | 0.020536 | FALSE | 2.318077 | FALSE | Endothelia Capillary E |
| TTCTAACT db/m2 | db/m | 2173  | 0.036891 | FALSE | 1.279416 | FALSE | Photoreceptor          |
| TTCTAGTA db/m2 | db/m | 3349  | 0.01981  | FALSE | 1.481381 | FALSE | Endothelia Venous EC   |
| TTCTAGTA db/m2 | db/m | 3183  | 0.021669 | FALSE | 1.061888 | FALSE | Neuron                 |
| TTCTCTCA db/m2 | db/m | 10460 | 0.016181 | FALSE | 0.155815 | FALSE | Photoreceptor          |
| TTCTCTCC db/m2 | db/m | 3845  | 0.071958 | FALSE | 1.237625 | FALSE | Photoreceptor          |
| TTCTCTCC db/m2 | db/m | 2136  | 0.030859 | FALSE | 0.541064 | FALSE | Photoreceptor          |
| TTCTGTAA db/m2 | db/m | 634   | 0.016488 | FALSE | 3.722553 | FALSE | Photoreceptor          |
| TTCTGTAT db/m2 | db/m | 2532  | 0.10565  | TRUE  | 3.734828 | FALSE |                        |
| TTCTTCCA db/m2 | db/m | 9102  | 0.047807 | FALSE | 0.830479 | FALSE | Photoreceptor          |
| TTCTTCCA db/m2 | db/m | 428   | 0.110901 | TRUE  | 0.140827 | FALSE |                        |
| TTCTTCCC db/m2 | db/m | 4934  | 0.006137 | FALSE | 1.15884  | FALSE | Neuron                 |
| TTCTTGAA db/m2 | db/m | 3499  | 0.018088 | FALSE | 1.290858 | FALSE | Endothelia Venous EC   |
| TTCTTGAA db/m2 | db/m | 2027  | 0.029787 | FALSE | 1.053161 | FALSE | Photoreceptor          |
| TTCTTGAC db/m2 | db/m | 1371  | 0.016181 | FALSE | 2.149051 | FALSE | Pericyte               |
| TTCTTGAG db/m2 | db/m | 4927  | 0.029787 | FALSE | 1.213817 | FALSE | Endothelia Venous EC   |

|                |      |      |          |       |          |       |                        |
|----------------|------|------|----------|-------|----------|-------|------------------------|
| TTCTTGAT db/m2 | db/m | 2663 | 0.051646 | FALSE | 1.381094 | FALSE | Photoreceptor          |
| TTGAACGC db/m2 | db/m | 3003 | 0.004927 | FALSE | 1.47452  | FALSE | Neuron                 |
| TTGAACGC db/m2 | db/m | 458  | 0.032546 | FALSE | 47.09562 | TRUE  |                        |
| TTGAACGC db/m2 | db/m | 2048 | 0.021669 | FALSE | 1.887425 | FALSE | Endothelia Capillary E |
| TTGAACGT db/m2 | db/m | 647  | 0.016181 | FALSE | 1.00515  | FALSE | Photoreceptor          |
| TTGAACGT db/m2 | db/m | 1256 | 0.011319 | FALSE | 1.847203 | FALSE | Endothelia Capillary E |
| TTGACCCA db/m2 | db/m | 2592 | 0.059406 | FALSE | 2.184636 | FALSE | Pericyte               |
| TTGAGTG/ db/m2 | db/m | 420  | 0.035586 | FALSE | 3.571508 | FALSE | Muller cell            |
| TTGAGTG/ db/m2 | db/m | 779  | 0.042704 | FALSE | 4.914067 | FALSE | Neuron                 |
| TTGAGTGT db/m2 | db/m | 3131 | 0.013338 | FALSE | 1.1901   | FALSE | Endothelia Capillary E |
| TTGAGTGT db/m2 | db/m | 3148 | 0.037564 | FALSE | 1.521295 | FALSE | Endothelia Capillary E |
| TTGAGTGT db/m2 | db/m | 347  | 0.018761 | FALSE | 40.70556 | TRUE  |                        |
| TTGAGTGT db/m2 | db/m | 4858 | 0.020536 | FALSE | 0.551508 | FALSE | Photoreceptor          |
| TTGATGG/ db/m2 | db/m | 370  | 0.054795 | FALSE | 9.913044 | TRUE  |                        |
| TTGATGGC db/m2 | db/m | 648  | 0.009493 | FALSE | 0.815981 | FALSE | Photoreceptor          |
| TTGATGGC db/m2 | db/m | 3087 | 0.009493 | FALSE | 1.087921 | FALSE | Photoreceptor          |
| TTGATGGC db/m2 | db/m | 9503 | 0.022455 | FALSE | 0.534277 | FALSE | Photoreceptor          |
| TTGATGGC db/m2 | db/m | 478  | 0.009493 | FALSE | 43.22251 | TRUE  |                        |
| TTGATGGC db/m2 | db/m | 4014 | 0.011805 | FALSE | 1.101579 | FALSE | Endothelia Aterial EC  |
| TTGCATTA db/m2 | db/m | 5948 | 0.027273 | FALSE | 1.025869 | FALSE | Endothelia Capillary E |
| TTGCATTG db/m2 | db/m | 640  | 0.030318 | FALSE | 42.72891 | TRUE  |                        |
| TTGCATTG db/m2 | db/m | 927  | 0.010614 | FALSE | 2.377814 | FALSE | Endothelia Capillary E |
| TTGCATTT db/m2 | db/m | 2079 | 0.020171 | FALSE | 1.565104 | FALSE | Photoreceptor          |
| TTGCCTGC db/m2 | db/m | 755  | 0.020536 | FALSE | 2.788337 | FALSE | Photoreceptor          |
| TTGCCTGT db/m2 | db/m | 520  | 0.019455 | FALSE | 2.361216 | FALSE | Photoreceptor          |
| TTGCCTGT db/m2 | db/m | 2208 | 0.038251 | FALSE | 2.200225 | FALSE | Photoreceptor          |
| TTGCCTGT db/m2 | db/m | 306  | 0.011805 | FALSE | 56.64865 | TRUE  |                        |
| TTGCGTCT db/m2 | db/m | 555  | 0.091004 | FALSE | 3.318765 | FALSE | Muller cell            |
| TTGCTGCA db/m2 | db/m | 364  | 0.010384 | FALSE | 3.469129 | FALSE | Endothelia Capillary E |
| TTGCTGCC db/m2 | db/m | 4251 | 0.041154 | FALSE | 1.291919 | FALSE | Photoreceptor          |
| TTGCTGCC db/m2 | db/m | 767  | 0.059406 | FALSE | 37.19478 | TRUE  |                        |
| TTGCTGCC db/m2 | db/m | 2211 | 0.011319 | FALSE | 1.348262 | FALSE | Pericyte               |
| TTGCTGCC db/m2 | db/m | 3908 | 0.021286 | FALSE | 1.03784  | FALSE | Photoreceptor          |
| TTGGATG/ db/m2 | db/m | 3929 | 0.015879 | FALSE | 1.152102 | FALSE | Photoreceptor          |
| TTGGATG/ db/m2 | db/m | 2005 | 0.049679 | FALSE | 1.449715 | FALSE | Muller cell            |
| TTGGATG/ db/m2 | db/m | 4924 | 0.020908 | FALSE | 1.136368 | FALSE | Photoreceptor          |
| TTGGATGC db/m2 | db/m | 1019 | 0.073582 | FALSE | 4.256248 | FALSE | Muller cell            |
| TTGGATGC db/m2 | db/m | 7565 | 0.046906 | FALSE | 1.033187 | FALSE | Photoreceptor          |
| TTGGGAT/ db/m2 | db/m | 2608 | 0.041154 | FALSE | 1.597057 | FALSE | Endothelia Venous EC   |
| TTGGGATC db/m2 | db/m | 2974 | 0.019455 | FALSE | 0.679931 | FALSE | Photoreceptor          |
| TTGGGATC db/m2 | db/m | 4028 | 0.045165 | FALSE | 1.527867 | FALSE | Photoreceptor          |
| TTGGGATT db/m2 | db/m | 766  | 0.017758 | FALSE | 46.90841 | TRUE  |                        |
| TTGGGTAI db/m2 | db/m | 708  | 0.218615 | TRUE  | 8.225807 | TRUE  |                        |
| TTGGTTTA db/m2 | db/m | 777  | 0.036232 | FALSE | 4.789171 | FALSE | Muller cell            |
| TTGGTTTA db/m2 | db/m | 742  | 0.055901 | FALSE | 27.1648  | TRUE  |                        |
| TTGGTTTA db/m2 | db/m | 3552 | 0.048732 | FALSE | 1.359358 | FALSE | Photoreceptor          |
| TTGGTTTG db/m2 | db/m | 548  | 0.143501 | TRUE  | 24.05286 | TRUE  |                        |



|                |      |      |          |       |          |       |                        |
|----------------|------|------|----------|-------|----------|-------|------------------------|
| TTGGTTTT db/m2 | db/m | 576  | 0.022455 | FALSE | 4.923204 | FALSE | Muller cell            |
| TTGGTTTT db/m2 | db/m | 620  | 0.055901 | FALSE | 2.984884 | FALSE | Muller cell            |
| TTGTGGA db/m2  | db/m | 711  | 0.005958 | FALSE | 0.755227 | FALSE | Endothelia Capillary E |
| TTGTGGA db/m2  | db/m | 1862 | 0.038953 | FALSE | 2.045095 | FALSE | Photoreceptor          |
| TTGTGTTC db/m2 | db/m | 6365 | 0.024534 | FALSE | 0.891331 | FALSE | Photoreceptor          |
| TTGTGTTC db/m2 | db/m | 4110 | 0.014151 | FALSE | 1.212097 | FALSE | Endothelia Venous EC   |
| TTGTGTTG db/m2 | db/m | 702  | 0.049679 | FALSE | 2.513771 | FALSE | Endothelia Capillary E |
| TTGTGTTG db/m2 | db/m | 2002 | 0.045165 | FALSE | 1.891634 | FALSE | Photoreceptor          |
| TTGTTCAC db/m2 | db/m | 1103 | 0.033726 | FALSE | 1.433061 | FALSE | Photoreceptor          |
| TTGTTCAC db/m2 | db/m | 339  | 0.009933 | FALSE | 55.34351 | TRUE  |                        |
| TTGTTCAC db/m2 | db/m | 2011 | 0.012052 | FALSE | 1.449027 | FALSE | Photoreceptor          |
| TTGTTCAT db/m2 | db/m | 2237 | 0.035586 | FALSE | 1.407169 | FALSE | Photoreceptor          |
| TTGTTGTT db/m2 | db/m | 2344 | 0.14163  | TRUE  | 3.520658 | FALSE |                        |
| TTGTTTGC db/m2 | db/m | 2222 | 0.015581 | FALSE | 0.940407 | FALSE | Endothelia Capillary E |
| TTGTTTGC db/m2 | db/m | 200  | 0.043505 | FALSE | 5.084745 | TRUE  |                        |
| TTGTTTGT db/m2 | db/m | 620  | 0.023266 | FALSE | 0.291512 | FALSE | Photoreceptor          |
| TTGTTTGT db/m2 | db/m | 1649 | 0.043505 | FALSE | 1.364253 | FALSE | Endothelia Capillary E |
| TTTACCAA db/m2 | db/m | 523  | 0.039671 | FALSE | 4.012008 | FALSE | Muller cell            |
| TTTACCAA db/m2 | db/m | 503  | 0.017114 | FALSE | 0.86474  | FALSE | Photoreceptor          |
| TTTACCAC db/m2 | db/m | 1929 | 0.034334 | FALSE | 1.975207 | FALSE | Photoreceptor          |
| TTTACCAG db/m2 | db/m | 3899 | 0.027758 | FALSE | 1.202694 | FALSE | Pericyte               |
| TTTACCAT db/m2 | db/m | 5361 | 0.013876 | FALSE | 0.676468 | FALSE | Photoreceptor          |
| TTTACGTA db/m2 | db/m | 1925 | 0.017114 | FALSE | 2.466857 | FALSE | Neuron                 |
| TTTACGTG db/m2 | db/m | 2839 | 0.023266 | FALSE | 1.456381 | FALSE | Endothelia Capillary E |
| TTTACGTT db/m2 | db/m | 3260 | 0.022455 | FALSE | 0.737677 | FALSE | Photoreceptor          |
| TTTACTGC db/m2 | db/m | 4346 | 0.029266 | FALSE | 1.005613 | FALSE | Photoreceptor          |
| TTTACTGT db/m2 | db/m | 3139 | 0.004275 | FALSE | 0.853841 | FALSE | Neuron                 |
| TTTAGTCA db/m2 | db/m | 2866 | 0.048732 | FALSE | 1.169621 | FALSE | Photoreceptor          |
| TTTAGTCG db/m2 | db/m | 688  | 0.034954 | FALSE | 0.493045 | FALSE | Photoreceptor          |
| TTTATGCC db/m2 | db/m | 9886 | 0.012303 | FALSE | 0.672115 | FALSE | Photoreceptor          |
| TTTATGCC db/m2 | db/m | 2694 | 0.008852 | FALSE | 2.083242 | FALSE | Photoreceptor          |
| TTTATGCG db/m2 | db/m | 901  | 0.073582 | FALSE | 45.39144 | TRUE  |                        |
| TTTATGCT db/m2 | db/m | 1100 | 0.041154 | FALSE | 1.121914 | FALSE | Photoreceptor          |
| TTTATGCT db/m2 | db/m | 3539 | 0.004927 | FALSE | 1.12275  | FALSE | Neuron                 |
| TTTATGCT db/m2 | db/m | 2826 | 0.021286 | FALSE | 1.042711 | FALSE | Photoreceptor          |
| TTTCACAA db/m2 | db/m | 580  | 0.05065  | FALSE | 3.419072 | FALSE | Muller cell            |
| TTTCACAC db/m2 | db/m | 317  | 0.015581 | FALSE | 60.42296 | TRUE  |                        |
| TTTCACAC db/m2 | db/m | 6197 | 0.030318 | FALSE | 1.214062 | FALSE | Neuron                 |
| TTTCACAG db/m2 | db/m | 4658 | 0.019455 | FALSE | 0.893028 | FALSE | Photoreceptor          |
| TTTCAGTT db/m2 | db/m | 1003 | 0.010614 | FALSE | 2.378294 | FALSE | Endothelia Capillary E |
| TTTCATGA db/m2 | db/m | 371  | 0.075259 | FALSE | 3.347268 | FALSE | Muller cell            |
| TTTCATGT db/m2 | db/m | 5129 | 0.013605 | FALSE | 1.091476 | FALSE | Endothelia Venous EC   |
| TTTCCTCA db/m2 | db/m | 540  | 0.033726 | FALSE | 53.85542 | TRUE  |                        |
| TTTCCTCA db/m2 | db/m | 735  | 0.016799 | FALSE | 2.606286 | FALSE | Photoreceptor          |
| TTTCCTCC db/m2 | db/m | 807  | 0.051646 | FALSE | 1.79357  | FALSE | Photoreceptor          |
| TTTCCTCC db/m2 | db/m | 516  | 0.030318 | FALSE | 3.152558 | FALSE | Muller cell            |
| TTTCCTCT db/m2 | db/m | 9029 | 0.014429 | FALSE | 0.632933 | FALSE | Photoreceptor          |

|          |        |       |       |          |       |          |       |                        |
|----------|--------|-------|-------|----------|-------|----------|-------|------------------------|
| TTTCCTCT | db/m2  | db/m  | 549   | 0.017434 | FALSE | 62.98497 | TRUE  |                        |
| TTTCGATA | db/m2  | db/m  | 730   | 0.013605 | FALSE | 1.159941 | FALSE | Photoreceptor          |
| TTTCGATC | db/m2  | db/m  | 3377  | 0.095727 | FALSE | 7.893612 | TRUE  |                        |
| TTTCGATG | db/m2  | db/m  | 1127  | 0.059406 | FALSE | 4.360377 | FALSE | Muller cell            |
| TTTGACTA | db/m2  | db/m  | 634   | 0.014151 | FALSE | 0.28533  | FALSE | Photoreceptor          |
| TTTGACTC | db/m2  | db/m  | 2619  | 0.054795 | FALSE | 1.425939 | FALSE | Photoreceptor          |
| TTTGACTC | db/m2  | db/m  | 6917  | 0.017758 | FALSE | 1.035786 | FALSE | Photoreceptor          |
| TTTGACTC | db/m2  | db/m  | 465   | 0.122691 | TRUE  | 31.92436 | TRUE  |                        |
| TTTGACTC | db/m2  | db/m  | 6202  | 0.038251 | FALSE | 1.422752 | FALSE | Endothelia Venous EC   |
| TTTGACTC | db/m2  | db/m  | 10234 | 0.014429 | FALSE | 0.745482 | FALSE | Photoreceptor          |
| TTTGACTG | db/m2  | db/m  | 503   | 0.024534 | FALSE | 34.58213 | TRUE  |                        |
| TTTGACTT | db/m2  | db/m  | 470   | 0.109375 | TRUE  | 11.5629  | TRUE  |                        |
| TTTGACTT | db/m2  | db/m  | 1814  | 0.020908 | FALSE | 1.051477 | FALSE | Photoreceptor          |
| TTTGATCA | db/m2  | db/m  | 4960  | 0.024105 | FALSE | 1.193737 | FALSE | Photoreceptor          |
| TTTGATCA | db/m2  | db/m  | 809   | 0.016799 | FALSE | 0.471294 | FALSE | Photoreceptor          |
| TTTGATCC | db/m2  | db/m  | 751   | 0.043505 | FALSE | 4.906116 | FALSE | Muller cell            |
| TTTGGAG/ | db/m2  | db/m  | 1548  | 0.027273 | FALSE | 0.784511 | FALSE | Photoreceptor          |
| TTTGGAG/ | db/m2  | db/m  | 4199  | 0.137569 | TRUE  | 1.262988 | FALSE |                        |
| TTTGGAG( | db/m2  | db/m  | 4194  | 0.018088 | FALSE | 1.291118 | FALSE | Endothelia Aterial EC  |
| TTTGGTTA | db/m2  | db/m  | 3519  | 0.020536 | FALSE | 1.149652 | FALSE | Endothelia Venous EC   |
| TTTGGTTA | db/m2  | db/m  | 6549  | 0.023682 | FALSE | 1.198454 | FALSE | Photoreceptor          |
| TTTGGTTC | db/m2  | db/m  | 7288  | 0.143501 | TRUE  | 3.646642 | FALSE |                        |
| TTTGGTTT | db/m2  | db/m  | 2327  | 0.015581 | FALSE | 0.545607 | FALSE | Photoreceptor          |
| TTTGGTTT | db/m2  | db/m  | 5555  | 0.019106 | FALSE | 0.842547 | FALSE | Photoreceptor          |
| TTTGGTTT | db/m2  | db/m  | 1066  | 0.034334 | FALSE | 0.798324 | FALSE | Photoreceptor          |
| TTTGTTC  | db/m2  | db/m  | 5575  | 0.119124 | TRUE  | 6.826414 | TRUE  |                        |
| TTTGTTC  | db/m2  | db/m  | 505   | 0.036232 | FALSE | 3.346761 | FALSE | Muller cell            |
| TTTGTTCG | db/m2  | db/m  | 403   | 0.036891 | FALSE | 3.021443 | FALSE | Muller cell            |
| TTTGTTCG | db/m2  | db/m  | 751   | 0.046906 | FALSE | 3.465138 | FALSE | Muller cell            |
| TTTGTTCG | db/m2  | db/m  | 341   | 0.049679 | FALSE | 4.518644 | FALSE | Muller cell            |
| TTTGTTCG | db/m2  | db/m  | 4298  | 0.043505 | FALSE | 1.298412 | FALSE | Endothelia Aterial EC  |
| TTTGTTCG | db/m2  | db/m  | 545   | 0.019106 | FALSE | 0.506167 | FALSE | Photoreceptor          |
| TTTGTTCG | db/m2  | db/m  | 542   | 0.051646 | FALSE | 27.9     | TRUE  |                        |
| AAACCCA/ | db/db1 | db/db | 6586  | 0.021669 | FALSE | 0.756305 | FALSE | Photoreceptor          |
| AAACCCA/ | db/db1 | db/db | 1177  | 0.091004 | FALSE | 0.908922 | FALSE | Photoreceptor          |
| AAACCCA/ | db/db1 | db/db | 3003  | 0.046906 | FALSE | 1.149953 | FALSE | Photoreceptor          |
| AAACCCA/ | db/db1 | db/db | 2853  | 0.017434 | FALSE | 0.803946 | FALSE | Endothelia Capillary E |
| AAACCCAC | db/db1 | db/db | 762   | 0.011081 | FALSE | 2.164579 | FALSE | Endothelia Capillary E |
| AAACCCAC | db/db1 | db/db | 2856  | 0.013338 | FALSE | 1.417783 | FALSE | Photoreceptor          |
| AAACCCAC | db/db1 | db/db | 2661  | 0.018761 | FALSE | 1.01069  | FALSE | Endothelia Capillary E |
| AAACCCAC | db/db1 | db/db | 1720  | 0.031411 | FALSE | 1.466708 | FALSE | Endothelia Capillary E |
| AAACCCAC | db/db1 | db/db | 431   | 0.100845 | TRUE  | 4.75382  | FALSE |                        |
| AAACCCAT | db/db1 | db/db | 8092  | 0.010846 | FALSE | 0.268805 | FALSE | Photoreceptor          |
| AAACCCAT | db/db1 | db/db | 1316  | 0.148319 | TRUE  | 1.794374 | FALSE |                        |
| AAACGAA/ | db/db1 | db/db | 737   | 0.03313  | FALSE | 2.542018 | FALSE | Photoreceptor          |
| AAACGAA( | db/db1 | db/db | 1497  | 0.037564 | FALSE | 0.528202 | FALSE | Photoreceptor          |
| AAACGAA` | db/db1 | db/db | 1849  | 0.046025 | FALSE | 1.401433 | FALSE | Photoreceptor          |

|                      |        |       |      |          |       |          |       |                         |
|----------------------|--------|-------|------|----------|-------|----------|-------|-------------------------|
| AAACGAA <sup>+</sup> | db/db1 | db/db | 2677 | 0.018761 | FALSE | 1.098729 | FALSE | Endothelia Venous EC    |
| AAACGAA <sup>+</sup> | db/db1 | db/db | 3469 | 0.01981  | FALSE | 0.879385 | FALSE | Endothelia Capillary EC |
| AAACGCT <sup>+</sup> | db/db1 | db/db | 928  | 0.057037 | FALSE | 1.646118 | FALSE | Photoreceptor           |
| AAACGCT <sup>+</sup> | db/db1 | db/db | 2914 | 0.060641 | FALSE | 1.036933 | FALSE | Endothelia Capillary EC |
| AAACGCT <sup>+</sup> | db/db1 | db/db | 607  | 0.04192  | FALSE | 1.03341  | FALSE | Photoreceptor           |
| AAACGCT <sup>+</sup> | db/db1 | db/db | 4056 | 0.018088 | FALSE | 0.869558 | FALSE | Endothelia Venous EC    |
| AAACGCT <sup>+</sup> | db/db1 | db/db | 3050 | 0.026796 | FALSE | 1.358948 | FALSE | Photoreceptor           |
| AAACGCT <sup>+</sup> | db/db1 | db/db | 4751 | 0.018088 | FALSE | 0.462524 | FALSE | Photoreceptor           |
| AAACGCT <sup>+</sup> | db/db1 | db/db | 2397 | 0.012052 | FALSE | 0.941036 | FALSE | Endothelia Capillary EC |
| AAAGAAC <sup>+</sup> | db/db1 | db/db | 1787 | 0.023266 | FALSE | 1.078492 | FALSE | Endothelia Capillary EC |
| AAAGAAC <sup>+</sup> | db/db1 | db/db | 3311 | 0.024971 | FALSE | 0.652367 | FALSE | Endothelia EC-C4        |
| AAAGAAC <sup>+</sup> | db/db1 | db/db | 7110 | 0.017758 | FALSE | 0.752472 | FALSE | Photoreceptor           |
| AAAGAAC <sup>+</sup> | db/db1 | db/db | 827  | 0.049679 | FALSE | 1.355493 | FALSE | Photoreceptor           |
| AAAGAAC <sup>+</sup> | db/db1 | db/db | 1593 | 0.055901 | FALSE | 1.239549 | FALSE | Photoreceptor           |
| AAAGAAC <sup>+</sup> | db/db1 | db/db | 1214 | 0.095727 | FALSE | 1.154913 | FALSE | Photoreceptor           |
| AAAGAAC <sup>+</sup> | db/db1 | db/db | 7353 | 0.018088 | FALSE | 0.504831 | FALSE | Photoreceptor           |
| AAAGGAT <sup>+</sup> | db/db1 | db/db | 647  | 0.025416 | FALSE | 0.847884 | FALSE | Photoreceptor           |
| AAAGGAT <sup>+</sup> | db/db1 | db/db | 1133 | 0.015287 | FALSE | 1.329605 | FALSE | Endothelia Capillary EC |
| AAAGGAT <sup>+</sup> | db/db1 | db/db | 1440 | 0.040404 | FALSE | 0.958755 | FALSE | Endothelia Capillary EC |
| AAAGGAT <sup>+</sup> | db/db1 | db/db | 3934 | 0.029787 | FALSE | 0.940299 | FALSE | Photoreceptor           |
| AAAGGAT <sup>+</sup> | db/db1 | db/db | 5833 | 0.046906 | FALSE | 0.884935 | FALSE | Photoreceptor           |
| AAAGGAT <sup>+</sup> | db/db1 | db/db | 4753 | 0.13452  | TRUE  | 2.540201 | FALSE |                         |
| AAAGGAT <sup>+</sup> | db/db1 | db/db | 4779 | 0.053718 | FALSE | 0.977072 | FALSE | Muller cell             |
| AAAGGGC <sup>+</sup> | db/db1 | db/db | 3257 | 0.028754 | FALSE | 0.952487 | FALSE | Photoreceptor           |
| AAAGGGC <sup>+</sup> | db/db1 | db/db | 434  | 0.048732 | FALSE | 3.157158 | FALSE | Endothelia Capillary EC |
| AAAGGGC <sup>+</sup> | db/db1 | db/db | 7467 | 0.014997 | FALSE | 0.591924 | FALSE | Photoreceptor           |
| AAAGGGC <sup>+</sup> | db/db1 | db/db | 2334 | 0.026328 | FALSE | 0.946155 | FALSE | Photoreceptor           |
| AAAGGGC <sup>+</sup> | db/db1 | db/db | 866  | 0.040404 | FALSE | 1.949432 | FALSE | Photoreceptor           |
| AAAGGGC <sup>+</sup> | db/db1 | db/db | 1696 | 0.218615 | TRUE  | 11.66621 | TRUE  |                         |
| AAAGGGC <sup>+</sup> | db/db1 | db/db | 1003 | 0.093319 | FALSE | 1.719866 | FALSE | Photoreceptor           |
| AAAGGGC <sup>+</sup> | db/db1 | db/db | 3081 | 0.047807 | FALSE | 1.117139 | FALSE | Endothelia Capillary EC |
| AAAGGGC <sup>+</sup> | db/db1 | db/db | 736  | 0.073582 | FALSE | 0.892041 | FALSE | Photoreceptor           |
| AAAGGGC <sup>+</sup> | db/db1 | db/db | 825  | 0.125386 | TRUE  | 0.434405 | FALSE |                         |
| AAAGGGC <sup>+</sup> | db/db1 | db/db | 3538 | 0.08663  | FALSE | 0.794283 | FALSE | Neuron                  |
| AAAGGTA <sup>+</sup> | db/db1 | db/db | 1802 | 0.013605 | FALSE | 1.027483 | FALSE | Endothelia Capillary EC |
| AAAGGTA <sup>+</sup> | db/db1 | db/db | 667  | 0.027758 | FALSE | 1.816872 | FALSE | Endothelia EC-C4        |
| AAAGGTA <sup>+</sup> | db/db1 | db/db | 1310 | 0.122388 | TRUE  | 2.645762 | FALSE |                         |
| AAAGGTA <sup>+</sup> | db/db1 | db/db | 1136 | 0.068864 | FALSE | 2.10517  | FALSE | Muller cell             |
| AAAGGTA <sup>+</sup> | db/db1 | db/db | 4806 | 0.014711 | FALSE | 1.06377  | FALSE | Photoreceptor           |
| AAAGGTA <sup>+</sup> | db/db1 | db/db | 5476 | 0.047807 | FALSE | 0.687612 | FALSE | Photoreceptor           |
| AAAGGTA <sup>+</sup> | db/db1 | db/db | 1767 | 0.010614 | FALSE | 1.020336 | FALSE | Endothelia EC-C4        |
| AAAGGTA <sup>+</sup> | db/db1 | db/db | 4417 | 0.049679 | FALSE | 0.901909 | FALSE | Photoreceptor           |
| AAAGGTA <sup>+</sup> | db/db1 | db/db | 4091 | 0.027758 | FALSE | 0.823688 | FALSE | Endothelia Venous EC    |
| AAAGGTA <sup>+</sup> | db/db1 | db/db | 1380 | 0.051646 | FALSE | 1.989605 | FALSE | Endothelia Aterial EC   |
| AAAGGTA <sup>+</sup> | db/db1 | db/db | 7331 | 0.020171 | FALSE | 0.580072 | FALSE | Photoreceptor           |
| AAAGTCC <sup>+</sup> | db/db1 | db/db | 2111 | 0.011805 | FALSE | 1.193077 | FALSE | Endothelia Capillary EC |
| AAAGTCC <sup>+</sup> | db/db1 | db/db | 386  | 0.014711 | FALSE | 2.940708 | FALSE | Photoreceptor           |

|                 |       |      |          |       |          |       |                        |
|-----------------|-------|------|----------|-------|----------|-------|------------------------|
| AAAGTCCC db/db1 | db/db | 9392 | 0.016181 | FALSE | 0.456857 | FALSE | Photoreceptor          |
| AAAGTCCC db/db1 | db/db | 5083 | 0.034954 | FALSE | 0.780582 | FALSE | Photoreceptor          |
| AAAGTCCC db/db1 | db/db | 813  | 0.004436 | FALSE | 1.243612 | FALSE | Endothelia Capillary E |
| AAAGTCCT db/db1 | db/db | 1878 | 0.048732 | FALSE | 0.768262 | FALSE | Photoreceptor          |
| AAAGTCCT db/db1 | db/db | 2020 | 0.010614 | FALSE | 0.893289 | FALSE | Endothelia Venous EC   |
| AAAGTCCT db/db1 | db/db | 2972 | 0.026328 | FALSE | 0.884779 | FALSE | Endothelia Venous EC   |
| AAAGTCCT db/db1 | db/db | 1042 | 0.020536 | FALSE | 0.888679 | FALSE | Photoreceptor          |
| AAAGTGA db/db1  | db/db | 2070 | 0.026328 | FALSE | 0.649339 | FALSE | Photoreceptor          |
| AAAGTGA db/db1  | db/db | 4103 | 0.008644 | FALSE | 1.152425 | FALSE | Photoreceptor          |
| AAAGTGA db/db1  | db/db | 3906 | 0.070386 | FALSE | 0.740433 | FALSE | Endothelia Venous EC   |
| AAAGTGA db/db1  | db/db | 528  | 0.012814 | FALSE | 3.205055 | FALSE | Muller cell            |
| AAAGTGA db/db1  | db/db | 3239 | 0.040404 | FALSE | 0.72265  | FALSE | Photoreceptor          |
| AAAGTGA db/db1  | db/db | 604  | 0.126437 | TRUE  | 3.739445 | FALSE |                        |
| AAAGTGA db/db1  | db/db | 495  | 0.052669 | FALSE | 3.459375 | FALSE | Muller cell            |
| AAAGTGA db/db1  | db/db | 522  | 0.035586 | FALSE | 4.348121 | FALSE | Muller cell            |
| AAATGGA db/db1  | db/db | 1122 | 0.012303 | FALSE | 1.41911  | FALSE | Endothelia Capillary E |
| AAATGGA db/db1  | db/db | 4558 | 0.033726 | FALSE | 0.706788 | FALSE | Endothelia EC-C4       |
| AAATGGA db/db1  | db/db | 712  | 0.314286 | TRUE  | 0.949367 | FALSE |                        |
| AAATGGA db/db1  | db/db | 6942 | 0.018422 | FALSE | 0.560214 | FALSE | Photoreceptor          |
| AAATGGA db/db1  | db/db | 1639 | 0.022857 | FALSE | 0.901267 | FALSE | Endothelia Aterial EC  |
| AAATGGA db/db1  | db/db | 1851 | 0.028754 | FALSE | 0.986884 | FALSE | Photoreceptor          |
| AAATGGA db/db1  | db/db | 2259 | 0.014429 | FALSE | 0.782188 | FALSE | Endothelia Capillary E |
| AACAAAG db/db1  | db/db | 1414 | 0.017434 | FALSE | 0.977908 | FALSE | Photoreceptor          |
| AACAAAG db/db1  | db/db | 1435 | 0.009277 | FALSE | 1.047314 | FALSE | Endothelia Capillary E |
| AACAAAG db/db1  | db/db | 1883 | 0.036232 | FALSE | 1.081798 | FALSE | Photoreceptor          |
| AACAAAG db/db1  | db/db | 2649 | 0.021669 | FALSE | 0.890124 | FALSE | Photoreceptor          |
| AACAAAG db/db1  | db/db | 8271 | 0.068864 | FALSE | 0.532422 | FALSE | Photoreceptor          |
| AACAAAG db/db1  | db/db | 1873 | 0.003497 | FALSE | 1.106255 | FALSE | Neuron                 |
| AACAACCA db/db1 | db/db | 3186 | 0.021669 | FALSE | 1.181906 | FALSE | Endothelia EC-C4       |
| AACAACCC db/db1 | db/db | 2249 | 0.043505 | FALSE | 0.846033 | FALSE | Photoreceptor          |
| AACAACCC db/db1 | db/db | 1310 | 0.057037 | FALSE | 1.016674 | FALSE | Photoreceptor          |
| AACAACCC db/db1 | db/db | 4490 | 0.445833 | TRUE  | 1.288114 | FALSE |                        |
| AACAACCC db/db1 | db/db | 1619 | 0.04192  | FALSE | 1.008947 | FALSE | Pericyte               |
| AACAACCT db/db1 | db/db | 598  | 0.091004 | FALSE | 2.738672 | FALSE | Photoreceptor          |
| AACAACCT db/db1 | db/db | 976  | 0.071958 | FALSE | 1.160255 | FALSE | Photoreceptor          |
| AACAAGA db/db1  | db/db | 1795 | 0.045165 | FALSE | 0.820922 | FALSE | Photoreceptor          |
| AACAAGA db/db1  | db/db | 398  | 0.036891 | FALSE | 2.356582 | FALSE | Photoreceptor          |
| AACAAGA db/db1  | db/db | 3893 | 0.009712 | FALSE | 0.973192 | FALSE | Endothelia Venous EC   |
| AACACACA db/db1 | db/db | 1888 | 0.024105 | FALSE | 1.043021 | FALSE | Endothelia Capillary E |
| AACACACC db/db1 | db/db | 980  | 0.038251 | FALSE | 1.109567 | FALSE | Photoreceptor          |
| AACACACC db/db1 | db/db | 2825 | 0.020171 | FALSE | 1.020282 | FALSE | Endothelia Capillary E |
| AACACACC db/db1 | db/db | 3304 | 0.045165 | FALSE | 1.216226 | FALSE | Photoreceptor          |
| AACACACC db/db1 | db/db | 4804 | 0.021286 | FALSE | 0.542148 | FALSE | Photoreceptor          |
| AACACACT db/db1 | db/db | 1526 | 0.036891 | FALSE | 0.733276 | FALSE | Photoreceptor          |
| AACACACT db/db1 | db/db | 2543 | 0.445833 | TRUE  | 3.42268  | FALSE |                        |
| AACACACT db/db1 | db/db | 480  | 0.035586 | FALSE | 0.974539 | FALSE | Microglia              |
| AACACACT db/db1 | db/db | 1806 | 0.010614 | FALSE | 1.098015 | FALSE | Endothelia EC-C4       |

|                 |       |      |          |       |          |       |                        |
|-----------------|-------|------|----------|-------|----------|-------|------------------------|
| AACACACT db/db1 | db/db | 261  | 0.109795 | TRUE  | 0.141683 | FALSE |                        |
| AACACACT db/db1 | db/db | 2744 | 0.014997 | FALSE | 1.024226 | FALSE | Photoreceptor          |
| AACAGGG db/db1  | db/db | 934  | 0.043505 | FALSE | 0.802468 | FALSE | Photoreceptor          |
| AACAGGG db/db1  | db/db | 2646 | 0.028754 | FALSE | 0.823307 | FALSE | Endothelia EC-C4       |
| AACAGGG db/db1  | db/db | 4205 | 0.036891 | FALSE | 0.761585 | FALSE | Photoreceptor          |
| AACAGGG db/db1  | db/db | 630  | 0.014997 | FALSE | 0.907649 | FALSE | Endothelia Capillary E |
| AACAGGG db/db1  | db/db | 3551 | 0.020908 | FALSE | 1.109736 | FALSE | Photoreceptor          |
| AACAGGG db/db1  | db/db | 3809 | 0.031973 | FALSE | 0.99292  | FALSE | Endothelia Venous EC   |
| AACAGGG db/db1  | db/db | 5972 | 0.014151 | FALSE | 0.839794 | FALSE | Photoreceptor          |
| AACAGGG db/db1  | db/db | 1661 | 0.028251 | FALSE | 0.670605 | FALSE | Photoreceptor          |
| AACAGGG db/db1  | db/db | 453  | 0.103567 | TRUE  | 7.588532 | TRUE  |                        |
| AACAGGG db/db1  | db/db | 5215 | 0.164835 | TRUE  | 2.454437 | FALSE |                        |
| AACAGGG db/db1  | db/db | 3500 | 0.03313  | FALSE | 0.752493 | FALSE | Photoreceptor          |
| AACCAAC db/db1  | db/db | 2744 | 0.011081 | FALSE | 1.35324  | FALSE | Photoreceptor          |
| AACCAAC db/db1  | db/db | 985  | 0.037564 | FALSE | 3.38408  | FALSE | Muller cell            |
| AACCAACC db/db1 | db/db | 400  | 0.08663  | FALSE | 8.506617 | TRUE  |                        |
| AACCAACC db/db1 | db/db | 3940 | 0.030859 | FALSE | 0.841792 | FALSE | Photoreceptor          |
| AACCAACC db/db1 | db/db | 2388 | 0.070386 | FALSE | 0.765554 | FALSE | Pericyte               |
| AACCAACC db/db1 | db/db | 934  | 0.052669 | FALSE | 1.63851  | FALSE | Photoreceptor          |
| AACCAACC db/db1 | db/db | 8422 | 0.035586 | FALSE | 0.699802 | FALSE | Photoreceptor          |
| AACCAACT db/db1 | db/db | 6877 | 0.036232 | FALSE | 0.80372  | FALSE | Photoreceptor          |
| AACCAACT db/db1 | db/db | 4714 | 0.091004 | FALSE | 0.805839 | FALSE | Endothelia Venous EC   |
| AACCACA db/db1  | db/db | 503  | 0.034954 | FALSE | 1.663769 | FALSE | Photoreceptor          |
| AACCACA db/db1  | db/db | 422  | 0.028251 | FALSE | 1.722538 | FALSE | Photoreceptor          |
| AACCACAC db/db1 | db/db | 743  | 0.053718 | FALSE | 1.767935 | FALSE | Photoreceptor          |
| AACCACAC db/db1 | db/db | 3139 | 0.020908 | FALSE | 0.674043 | FALSE | Photoreceptor          |
| AACCACAC db/db1 | db/db | 1867 | 0.012052 | FALSE | 1.248408 | FALSE | Endothelia Capillary E |
| AACCACAC db/db1 | db/db | 8334 | 0.028754 | FALSE | 0.558767 | FALSE | Photoreceptor          |
| AACCACAC db/db1 | db/db | 2114 | 0.018422 | FALSE | 0.803106 | FALSE | Endothelia Capillary E |
| AACCACAT db/db1 | db/db | 3119 | 0.036232 | FALSE | 0.755635 | FALSE | Photoreceptor          |
| AACCATG db/db1  | db/db | 2518 | 0.026328 | FALSE | 1.196888 | FALSE | Endothelia Aterial EC  |
| AACCATG db/db1  | db/db | 597  | 0.068864 | FALSE | 1.101616 | FALSE | Photoreceptor          |
| AACCATG db/db1  | db/db | 3356 | 0.04192  | FALSE | 1.081076 | FALSE | Endothelia Venous EC   |
| AACCATG db/db1  | db/db | 3094 | 0.051646 | FALSE | 0.860435 | FALSE | Photoreceptor          |
| AACCATGC db/db1 | db/db | 2785 | 0.015581 | FALSE | 0.723254 | FALSE | Photoreceptor          |
| AACCATGC db/db1 | db/db | 683  | 0.03313  | FALSE | 2.261734 | FALSE | Neuron                 |
| AACCATGC db/db1 | db/db | 3255 | 0.011805 | FALSE | 0.888267 | FALSE | Endothelia Capillary E |
| AACCCAAC db/db1 | db/db | 1223 | 0.122691 | TRUE  | 3.480519 | FALSE |                        |
| AACCCAAT db/db1 | db/db | 1632 | 0.026328 | FALSE | 0.427695 | FALSE | Photoreceptor          |
| AACCTGA db/db1  | db/db | 475  | 0.130374 | TRUE  | 3.459638 | FALSE |                        |
| AACCTGAC db/db1 | db/db | 3509 | 0.036232 | FALSE | 1.024376 | FALSE | Photoreceptor          |
| AACCTGAC db/db1 | db/db | 626  | 0.046906 | FALSE | 2.102954 | FALSE | Muller cell            |
| AACCTGAT db/db1 | db/db | 3286 | 0.084562 | FALSE | 1.238854 | FALSE | Muller cell            |
| AACCTGAT db/db1 | db/db | 728  | 0.314286 | TRUE  | 18.88412 | TRUE  |                        |
| AACCTTTA db/db1 | db/db | 554  | 0.014711 | FALSE | 2.192652 | FALSE | Endothelia Capillary E |
| AACCTTTA db/db1 | db/db | 2916 | 0.017758 | FALSE | 0.548299 | FALSE | Photoreceptor          |
| AACCTTTC db/db1 | db/db | 3131 | 0.115723 | TRUE  | 4.977376 | FALSE |                        |

|                 |       |      |          |       |          |       |                        |
|-----------------|-------|------|----------|-------|----------|-------|------------------------|
| AACCTTTG db/db1 | db/db | 5478 | 0.021286 | FALSE | 0.753508 | FALSE | Photoreceptor          |
| AACCTTTT db/db1 | db/db | 1100 | 0.137569 | TRUE  | 1.942319 | FALSE |                        |
| AACCTTTT db/db1 | db/db | 785  | 0.059406 | FALSE | 7.325383 | TRUE  |                        |
| AACCTTTT db/db1 | db/db | 4085 | 0.030859 | FALSE | 1.215439 | FALSE | Endothelia Venous EC   |
| AACCTTTT db/db1 | db/db | 3487 | 0.038953 | FALSE | 0.797999 | FALSE | Endothelia EC-C4       |
| AACGAAA db/db1  | db/db | 3666 | 0.039671 | FALSE | 0.625606 | FALSE | Photoreceptor          |
| AACGAAA db/db1  | db/db | 434  | 0.006683 | FALSE | 2.500242 | FALSE | Endothelia Capillary E |
| AACGAAA db/db1  | db/db | 607  | 0.059406 | FALSE | 3.554599 | FALSE | Muller cell            |
| AACGAAA db/db1  | db/db | 1496 | 0.070386 | FALSE | 1.728874 | FALSE | Endothelia Capillary E |
| AACGAAA db/db1  | db/db | 3459 | 0.048732 | FALSE | 0.906283 | FALSE | Photoreceptor          |
| AACGAAA db/db1  | db/db | 5738 | 0.018088 | FALSE | 0.649013 | FALSE | Photoreceptor          |
| AACGAAA db/db1  | db/db | 951  | 0.036232 | FALSE | 1.028465 | FALSE | Photoreceptor          |
| AACGAAA db/db1  | db/db | 3080 | 0.015287 | FALSE | 1.118855 | FALSE | Photoreceptor          |
| AACGAAA db/db1  | db/db | 1670 | 0.022857 | FALSE | 1.068179 | FALSE | Endothelia EC-C4       |
| AACGAAA db/db1  | db/db | 1796 | 0.059406 | FALSE | 7.630058 | TRUE  |                        |
| AACGAAA db/db1  | db/db | 980  | 0.034954 | FALSE | 2.457727 | FALSE | Neuron                 |
| AACGAAA db/db1  | db/db | 1012 | 0.022857 | FALSE | 1.835155 | FALSE | Endothelia Capillary E |
| AACGGGA db/db1  | db/db | 1426 | 0.012303 | FALSE | 1.276939 | FALSE | Endothelia Capillary E |
| AACGGGA db/db1  | db/db | 4668 | 0.036891 | FALSE | 0.945733 | FALSE | Photoreceptor          |
| AACGGGA db/db1  | db/db | 5803 | 0.019106 | FALSE | 0.673123 | FALSE | Photoreceptor          |
| AACGGGA db/db1  | db/db | 681  | 0.014429 | FALSE | 0.325007 | FALSE | Photoreceptor          |
| AACGGGA db/db1  | db/db | 3030 | 0.280108 | TRUE  | 4.277017 | FALSE |                        |
| AACGGGA db/db1  | db/db | 3865 | 0.022455 | FALSE | 0.978803 | FALSE | Endothelia Capillary E |
| AACGGGA db/db1  | db/db | 2822 | 0.026328 | FALSE | 0.392112 | FALSE | Photoreceptor          |
| AACGGGA db/db1  | db/db | 2207 | 0.01981  | FALSE | 0.959933 | FALSE | Endothelia Capillary E |
| AACGGGA db/db1  | db/db | 4398 | 0.139562 | TRUE  | 2.167264 | FALSE |                        |
| AACGGGA db/db1  | db/db | 2384 | 0.052669 | FALSE | 0.946479 | FALSE | Photoreceptor          |
| AACGGGA db/db1  | db/db | 9146 | 0.031411 | FALSE | 0.452441 | FALSE | Photoreceptor          |
| AACGGGA db/db1  | db/db | 1956 | 0.016181 | FALSE | 1.137923 | FALSE | Endothelia Capillary E |
| AACGGGA db/db1  | db/db | 2048 | 0.131994 | TRUE  | 1.15782  | FALSE |                        |
| AACGTCA db/db1  | db/db | 440  | 0.022059 | FALSE | 1.659712 | FALSE | Pericyte               |
| AACGTCA db/db1  | db/db | 794  | 0.013074 | FALSE | 0.625694 | FALSE | Photoreceptor          |
| AACGTCA db/db1  | db/db | 3013 | 0.014997 | FALSE | 1.013525 | FALSE | Endothelia Venous EC   |
| AACGTCA db/db1  | db/db | 1977 | 0.025416 | FALSE | 0.874838 | FALSE | Photoreceptor          |
| AACGTCA db/db1  | db/db | 2548 | 0.119124 | TRUE  | 7.748889 | TRUE  |                        |
| AACGTCA db/db1  | db/db | 3342 | 0.656627 | TRUE  | 4.397732 | FALSE |                        |
| AACGTCA db/db1  | db/db | 6735 | 0.023682 | FALSE | 0.674937 | FALSE | Photoreceptor          |
| AACGTCA db/db1  | db/db | 397  | 0.052669 | FALSE | 2.367436 | FALSE | Endothelia Capillary E |
| AACGTCA db/db1  | db/db | 1278 | 0.130259 | TRUE  | 2.75473  | FALSE |                        |
| AACGTCA db/db1  | db/db | 695  | 0.034954 | FALSE | 0.821715 | FALSE | Photoreceptor          |
| AACGTCA db/db1  | db/db | 8381 | 0.013605 | FALSE | 0.375649 | FALSE | Photoreceptor          |
| AACTTCTA db/db1 | db/db | 1847 | 0.020171 | FALSE | 0.690489 | FALSE | Microglia              |
| AACTTCTC db/db1 | db/db | 1877 | 0.047807 | FALSE | 0.848061 | FALSE | Photoreceptor          |
| AACTTCTC db/db1 | db/db | 4798 | 0.025416 | FALSE | 0.807145 | FALSE | Endothelia Venous EC   |
| AACTTCTG db/db1 | db/db | 2737 | 0.048732 | FALSE | 1.215385 | FALSE | Photoreceptor          |
| AACTTCTT db/db1 | db/db | 1048 | 0.05065  | FALSE | 1.100677 | FALSE | Photoreceptor          |
| AAGAACA db/db1  | db/db | 1476 | 0.010157 | FALSE | 1.030957 | FALSE | Endothelia EC-C4       |

|          |        |       |      |          |       |          |       |                        |
|----------|--------|-------|------|----------|-------|----------|-------|------------------------|
| AAGAACA  | db/db1 | db/db | 1870 | 0.036232 | FALSE | 0.585161 | FALSE | Photoreceptor          |
| AAGAACA  | db/db1 | db/db | 600  | 0.013074 | FALSE | 2.611345 | FALSE | Endothelia Capillary E |
| AAGAACA  | db/db1 | db/db | 2385 | 0.035586 | FALSE | 0.980252 | FALSE | Photoreceptor          |
| AAGAACA  | db/db1 | db/db | 655  | 0.059406 | FALSE | 4.09753  | FALSE | Muller cell            |
| AAGAACA  | db/db1 | db/db | 2385 | 0.063221 | FALSE | 0.843596 | FALSE | Photoreceptor          |
| AAGAACA  | db/db1 | db/db | 3523 | 0.043505 | FALSE | 0.865802 | FALSE | Photoreceptor          |
| AAGAACA  | db/db1 | db/db | 486  | 0.122691 | TRUE  | 2.435312 | FALSE |                        |
| AAGACAA  | db/db1 | db/db | 2507 | 0.030859 | FALSE | 0.996137 | FALSE | Endothelia EC-C4       |
| AAGACAA  | db/db1 | db/db | 1914 | 0.098234 | FALSE | 0.941769 | FALSE | Photoreceptor          |
| AAGACAA  | db/db1 | db/db | 1511 | 0.048732 | FALSE | 1.420362 | FALSE | Photoreceptor          |
| AAGACAA  | db/db1 | db/db | 1321 | 0.073582 | FALSE | 1.626034 | FALSE | Photoreceptor          |
| AAGACAA  | db/db1 | db/db | 697  | 0.032546 | FALSE | 2.044054 | FALSE | Photoreceptor          |
| AAGACAA  | db/db1 | db/db | 2209 | 0.016181 | FALSE | 0.862479 | FALSE | Endothelia Capillary E |
| AAGACAA  | db/db1 | db/db | 1490 | 0.040404 | FALSE | 1.107276 | FALSE | Photoreceptor          |
| AAGACAA  | db/db1 | db/db | 2770 | 0.017434 | FALSE | 1.005252 | FALSE | Endothelia Venous EC   |
| AAGACAA  | db/db1 | db/db | 3683 | 0.037564 | FALSE | 0.753328 | FALSE | Photoreceptor          |
| AAGACAA  | db/db1 | db/db | 397  | 0.038251 | FALSE | 2.490087 | FALSE | Photoreceptor          |
| AAGACTCC | db/db1 | db/db | 538  | 0.014429 | FALSE | 1.736931 | FALSE | Photoreceptor          |
| AAGACTCC | db/db1 | db/db | 3060 | 0.030859 | FALSE | 0.892924 | FALSE | Photoreceptor          |
| AAGACTCC | db/db1 | db/db | 1768 | 0.119124 | TRUE  | 5.540974 | TRUE  |                        |
| AAGACTCT | db/db1 | db/db | 723  | 0.031973 | FALSE | 0.554812 | FALSE | Photoreceptor          |
| AAGACTCT | db/db1 | db/db | 879  | 0.01981  | FALSE | 1.296542 | FALSE | Endothelia Capillary E |
| AAGACTCT | db/db1 | db/db | 1515 | 0.018088 | FALSE | 0.435508 | FALSE | Photoreceptor          |
| AAGACTCT | db/db1 | db/db | 516  | 0.05065  | FALSE | 2.560244 | FALSE | Endothelia Capillary E |
| AAGATAG  | db/db1 | db/db | 723  | 0.038953 | FALSE | 2.793356 | FALSE | Photoreceptor          |
| AAGATAG  | db/db1 | db/db | 2279 | 0.023266 | FALSE | 1.096262 | FALSE | Endothelia Venous EC   |
| AAGATAG  | db/db1 | db/db | 640  | 0.061912 | FALSE | 3.265087 | FALSE | Muller cell            |
| AAGATAG  | db/db1 | db/db | 1082 | 0.029266 | FALSE | 1.151125 | FALSE | Photoreceptor          |
| AAGATAG  | db/db1 | db/db | 2563 | 0.022059 | FALSE | 1.054316 | FALSE | Endothelia Capillary E |
| AAGATAG  | db/db1 | db/db | 954  | 0.019106 | FALSE | 1.217065 | FALSE | Endothelia Capillary E |
| AAGATAG  | db/db1 | db/db | 1494 | 0.010614 | FALSE | 1.223595 | FALSE | Endothelia Capillary E |
| AAGATAG  | db/db1 | db/db | 1122 | 0.080645 | FALSE | 1.456719 | FALSE | Endothelia Capillary E |
| AAGATAG  | db/db1 | db/db | 435  | 0.011319 | FALSE | 1.236666 | FALSE | Endothelia Capillary E |
| AAGATAG  | db/db1 | db/db | 7226 | 0.015581 | FALSE | 0.540315 | FALSE | Photoreceptor          |
| AAGCATC  | db/db1 | db/db | 629  | 0.061912 | FALSE | 1.631145 | FALSE | Photoreceptor          |
| AAGCATC  | db/db1 | db/db | 1983 | 0.053718 | FALSE | 0.802708 | FALSE | Photoreceptor          |
| AAGCATC  | db/db1 | db/db | 2585 | 0.063221 | FALSE | 0.885962 | FALSE | Photoreceptor          |
| AAGCATCC | db/db1 | db/db | 2116 | 0.019106 | FALSE | 0.871646 | FALSE | Endothelia Capillary E |
| AAGCATCC | db/db1 | db/db | 3520 | 0.031411 | FALSE | 0.426004 | FALSE | Photoreceptor          |
| AAGCATCT | db/db1 | db/db | 1362 | 0.068864 | FALSE | 0.849305 | FALSE | Photoreceptor          |
| AAGCCATC | db/db1 | db/db | 1771 | 0.034334 | FALSE | 1.013229 | FALSE | Endothelia EC-C4       |
| AAGCCATC | db/db1 | db/db | 302  | 0.042704 | FALSE | 1.480644 | FALSE | Microglia              |
| AAGCCATC | db/db1 | db/db | 764  | 0.040404 | FALSE | 0.675924 | FALSE | Photoreceptor          |
| AAGCCATC | db/db1 | db/db | 1186 | 0.023682 | FALSE | 2.059515 | FALSE | Neuron                 |
| AAGCCATT | db/db1 | db/db | 588  | 0.060641 | FALSE | 1.068541 | FALSE | Photoreceptor          |
| AAGCGAG  | db/db1 | db/db | 505  | 0.15354  | TRUE  | 4.852941 | FALSE |                        |
| AAGCGAG  | db/db1 | db/db | 4650 | 0.03313  | FALSE | 1.007253 | FALSE | Photoreceptor          |

|                |       |      |          |       |          |       |                        |
|----------------|-------|------|----------|-------|----------|-------|------------------------|
| AAGCGAG db/db1 | db/db | 8397 | 0.018761 | FALSE | 0.380256 | FALSE | Photoreceptor          |
| AAGCGAG db/db1 | db/db | 588  | 0.016181 | FALSE | 1.96797  | FALSE | Endothelia Capillary E |
| AAGCGAG db/db1 | db/db | 691  | 0.051646 | FALSE | 0.926444 | FALSE | Photoreceptor          |
| AAGCGAG db/db1 | db/db | 573  | 0.036232 | FALSE | 0.161041 | FALSE | Photoreceptor          |
| AAGCGAG db/db1 | db/db | 3848 | 0.008644 | FALSE | 0.746835 | FALSE | Endothelia EC-C4       |
| AAGCGAG db/db1 | db/db | 999  | 0.070386 | FALSE | 1.612379 | FALSE | Photoreceptor          |
| AAGCGAG db/db1 | db/db | 3890 | 0.039671 | FALSE | 0.941364 | FALSE | Photoreceptor          |
| AAGCGAG db/db1 | db/db | 1898 | 0.08663  | FALSE | 1.115915 | FALSE | Photoreceptor          |
| AAGCGAG db/db1 | db/db | 567  | 0.119124 | TRUE  | 10.73385 | TRUE  |                        |
| AAGCGAG db/db1 | db/db | 1815 | 0.036891 | FALSE | 1.459332 | FALSE | Endothelia Capillary E |
| AAGCGTT db/db1 | db/db | 476  | 0.150727 | TRUE  | 2.013423 | FALSE |                        |
| AAGCGTT db/db1 | db/db | 4648 | 0.030318 | FALSE | 0.940231 | FALSE | Photoreceptor          |
| AAGCGTT db/db1 | db/db | 1836 | 0.033726 | FALSE | 1.385259 | FALSE | Endothelia Aterial EC  |
| AAGCGTT db/db1 | db/db | 1877 | 0.003497 | FALSE | 0.559531 | FALSE | Neuron                 |
| AAGGAAT db/db1 | db/db | 893  | 0.036232 | FALSE | 1.773868 | FALSE | Endothelia Capillary E |
| AAGGAAT db/db1 | db/db | 769  | 0.028251 | FALSE | 1.806026 | FALSE | Photoreceptor          |
| AAGGAAT db/db1 | db/db | 470  | 0.027273 | FALSE | 3.883612 | FALSE | Muller cell            |
| AAGGAAT db/db1 | db/db | 1163 | 0.008852 | FALSE | 1.071861 | FALSE | Endothelia EC-C4       |
| AAGGAAT db/db1 | db/db | 697  | 0.012052 | FALSE | 2.68152  | FALSE | Muller cell            |
| AAGGAAT db/db1 | db/db | 4756 | 0.037564 | FALSE | 0.695271 | FALSE | Photoreceptor          |
| AAGGAAT db/db1 | db/db | 7952 | 0.060641 | FALSE | 0.519783 | FALSE | Photoreceptor          |
| AAGGTAA db/db1 | db/db | 3080 | 0.023266 | FALSE | 0.954412 | FALSE | Photoreceptor          |
| AAGGTAA db/db1 | db/db | 2796 | 0.045165 | FALSE | 0.578117 | FALSE | Microglia              |
| AAGGTAA db/db1 | db/db | 1892 | 0.037564 | FALSE | 1.037132 | FALSE | Photoreceptor          |
| AAGGTAA db/db1 | db/db | 7617 | 0.033726 | FALSE | 0.453238 | FALSE | Photoreceptor          |
| AAGGTAA db/db1 | db/db | 3836 | 0.110901 | TRUE  | 1.019276 | FALSE |                        |
| AAGGTAA db/db1 | db/db | 1181 | 0.008234 | FALSE | 1.288768 | FALSE | Endothelia Capillary E |
| AAGGTAA db/db1 | db/db | 675  | 0.033726 | FALSE | 1.451287 | FALSE | Photoreceptor          |
| AAGGTAA db/db1 | db/db | 1372 | 0.019455 | FALSE | 0.496913 | FALSE | Photoreceptor          |
| AAGGTAA db/db1 | db/db | 2828 | 0.020171 | FALSE | 1.107626 | FALSE | Endothelia EC-C4       |
| AAGGTAA db/db1 | db/db | 538  | 0.020171 | FALSE | 0.886365 | FALSE | Photoreceptor          |
| AAGGTAA db/db1 | db/db | 403  | 0.061912 | FALSE | 3.032176 | FALSE | Photoreceptor          |
| AAGTACC db/db1 | db/db | 1363 | 0.067388 | FALSE | 9.200344 | TRUE  |                        |
| AAGTACC db/db1 | db/db | 3839 | 0.028754 | FALSE | 1.003833 | FALSE | Photoreceptor          |
| AAGTACC db/db1 | db/db | 8170 | 0.159016 | TRUE  | 0.575565 | FALSE |                        |
| AAGTACC db/db1 | db/db | 6735 | 0.018088 | FALSE | 0.662445 | FALSE | Photoreceptor          |
| AAGTACC db/db1 | db/db | 4231 | 0.029266 | FALSE | 0.570193 | FALSE | Photoreceptor          |
| AAGTACC db/db1 | db/db | 1008 | 0.006317 | FALSE | 1.148357 | FALSE | Endothelia Capillary E |
| AAGTACC db/db1 | db/db | 856  | 0.004598 | FALSE | 1.765143 | FALSE | Pericyte               |
| AAGTACC db/db1 | db/db | 624  | 0.055901 | FALSE | 1.99089  | FALSE | Photoreceptor          |
| AAGTACC db/db1 | db/db | 1704 | 0.143776 | TRUE  | 4.037932 | FALSE |                        |
| AAGTACT db/db1 | db/db | 2388 | 0.028754 | FALSE | 0.90562  | FALSE | Endothelia Aterial EC  |
| AAGTCGT db/db1 | db/db | 6418 | 0.018761 | FALSE | 0.567666 | FALSE | Photoreceptor          |
| AAGTCGT db/db1 | db/db | 2238 | 0.016181 | FALSE | 0.869948 | FALSE | Endothelia Venous EC   |
| AAGTCGT db/db1 | db/db | 4574 | 0.103567 | TRUE  | 2.739244 | FALSE |                        |
| AAGTCGT db/db1 | db/db | 4591 | 0.411992 | TRUE  | 3.142691 | FALSE |                        |
| AAGTCGT db/db1 | db/db | 3307 | 0.024534 | FALSE | 0.645818 | FALSE | Photoreceptor          |



|                |       |      |          |       |          |       |                        |
|----------------|-------|------|----------|-------|----------|-------|------------------------|
| AAGTGAA/db/db1 | db/db | 5833 | 0.025416 | FALSE | 0.787492 | FALSE | Photoreceptor          |
| AAGTGAA/db/db1 | db/db | 676  | 0.054795 | FALSE | 1.662415 | FALSE | Photoreceptor          |
| AAGTGAA/db/db1 | db/db | 3105 | 0.064568 | FALSE | 1.635318 | FALSE | Photoreceptor          |
| AAGTGAA/db/db1 | db/db | 3018 | 0.014997 | FALSE | 0.363082 | FALSE | Photoreceptor          |
| AAGTGAA/db/db1 | db/db | 5559 | 0.064568 | FALSE | 0.834498 | FALSE | Neuron                 |
| AAGTGAA/db/db1 | db/db | 7969 | 0.034954 | FALSE | 0.56864  | FALSE | Photoreceptor          |
| AAGTGAA/db/db1 | db/db | 7376 | 0.024105 | FALSE | 0.59814  | FALSE | Photoreceptor          |
| AAGTTCG/db/db1 | db/db | 1976 | 0.022857 | FALSE | 1.324943 | FALSE | Endothelia Venous EC   |
| AAGTTCG/db/db1 | db/db | 641  | 0.037564 | FALSE | 1.648743 | FALSE | Photoreceptor          |
| AAGTTCG/db/db1 | db/db | 3208 | 0.047807 | FALSE | 1.147831 | FALSE | Photoreceptor          |
| AAGTTCG/db/db1 | db/db | 2718 | 0.059406 | FALSE | 1.656725 | FALSE | Neuron                 |
| AAGTTCG/db/db1 | db/db | 6806 | 0.012814 | FALSE | 0.458944 | FALSE | Photoreceptor          |
| AAGTTCG/db/db1 | db/db | 2811 | 0.020171 | FALSE | 1.026248 | FALSE | Endothelia Venous EC   |
| AAGTTCG/db/db1 | db/db | 6909 | 0.012052 | FALSE | 0.52143  | FALSE | Photoreceptor          |
| AAGTTCG/db/db1 | db/db | 1370 | 0.029787 | FALSE | 0.340263 | FALSE | Photoreceptor          |
| AAGTTCG/db/db1 | db/db | 544  | 0.065957 | FALSE | 1.597555 | FALSE | Photoreceptor          |
| AATAGAG/db/db1 | db/db | 3505 | 0.044326 | FALSE | 1.393341 | FALSE | Photoreceptor          |
| AATAGAG/db/db1 | db/db | 1035 | 0.042704 | FALSE | 1.1835   | FALSE | Photoreceptor          |
| AATAGAG/db/db1 | db/db | 2599 | 0.059406 | FALSE | 1.040143 | FALSE | Endothelia Venous EC   |
| AATAGAG/db/db1 | db/db | 1006 | 0.051646 | FALSE | 2.453417 | FALSE | Photoreceptor          |
| AATAGAG/db/db1 | db/db | 579  | 0.030859 | FALSE | 2.734474 | FALSE | Photoreceptor          |
| AATAGAG/db/db1 | db/db | 3283 | 0.030859 | FALSE | 0.846041 | FALSE | Photoreceptor          |
| AATAGAG/db/db1 | db/db | 1045 | 0.053718 | FALSE | 0.921008 | FALSE | Muller cell            |
| AATAGAG/db/db1 | db/db | 2447 | 0.014429 | FALSE | 0.870997 | FALSE | Endothelia Venous EC   |
| AATAGAG/db/db1 | db/db | 3231 | 0.034334 | FALSE | 0.786132 | FALSE | Endothelia EC-C4       |
| AATAGAG/db/db1 | db/db | 4284 | 0.032546 | FALSE | 0.889166 | FALSE | Endothelia Venous EC   |
| AATAGAG/db/db1 | db/db | 800  | 0.068864 | FALSE | 1.369481 | FALSE | Photoreceptor          |
| AATAGAG/db/db1 | db/db | 7439 | 0.022059 | FALSE | 0.417584 | FALSE | Photoreceptor          |
| AATAGAG/db/db1 | db/db | 3054 | 0.016488 | FALSE | 1.06202  | FALSE | Photoreceptor          |
| AATCACG/db/db1 | db/db | 4277 | 0.013338 | FALSE | 0.919638 | FALSE | Photoreceptor          |
| AATCACG/db/db1 | db/db | 6073 | 0.021286 | FALSE | 0.734837 | FALSE | Photoreceptor          |
| AATCACG/db/db1 | db/db | 1148 | 0.024534 | FALSE | 1.004069 | FALSE | Photoreceptor          |
| AATCACG/db/db1 | db/db | 2769 | 0.017758 | FALSE | 1.122076 | FALSE | Endothelia EC-C4       |
| AATCACG/db/db1 | db/db | 464  | 0.100845 | TRUE  | 8.81459  | TRUE  |                        |
| AATCACG/db/db1 | db/db | 1835 | 0.075259 | FALSE | 1.235241 | FALSE | Photoreceptor          |
| AATCACG/db/db1 | db/db | 1417 | 0.023266 | FALSE | 0.974692 | FALSE | Photoreceptor          |
| AATCACG/db/db1 | db/db | 3110 | 0.033726 | FALSE | 0.983602 | FALSE | Endothelia Capillary E |
| AATCACG/db/db1 | db/db | 6032 | 0.093319 | FALSE | 6.669016 | TRUE  |                        |
| AATCACG/db/db1 | db/db | 2656 | 0.014429 | FALSE | 0.924734 | FALSE | Endothelia Aterial EC  |
| AATCACG/db/db1 | db/db | 6526 | 0.027273 | FALSE | 0.631637 | FALSE | Photoreceptor          |
| AATCACG/db/db1 | db/db | 1340 | 0.010384 | FALSE | 1.340902 | FALSE | Endothelia Capillary E |
| AATCGAC/db/db1 | db/db | 505  | 0.091004 | FALSE | 1.656826 | FALSE | Endothelia Capillary E |
| AATCGAC/db/db1 | db/db | 1151 | 0.13452  | TRUE  | 7.590759 | TRUE  |                        |
| AATCGAC/db/db1 | db/db | 1640 | 0.006317 | FALSE | 1.270273 | FALSE | Pericyte               |
| AATCGAC/db/db1 | db/db | 612  | 0.011081 | FALSE | 1.476994 | FALSE | Endothelia Capillary E |
| AATCGAC/db/db1 | db/db | 3143 | 0.010157 | FALSE | 0.940917 | FALSE | Endothelia EC-C4       |
| AATCGTG/db/db1 | db/db | 3340 | 0.014151 | FALSE | 1.055812 | FALSE | Photoreceptor          |

|          |        |       |      |          |       |          |       |                        |
|----------|--------|-------|------|----------|-------|----------|-------|------------------------|
| AATCGTG  | db/db1 | db/db | 6592 | 0.021669 | FALSE | 0.68195  | FALSE | Photoreceptor          |
| AATCGTG  | db/db1 | db/db | 1819 | 0.053718 | FALSE | 0.907519 | FALSE | Photoreceptor          |
| AATCGTG  | db/db1 | db/db | 1975 | 0.002901 | FALSE | 0.564104 | FALSE | Neuron                 |
| AATCGTG  | db/db1 | db/db | 758  | 0.061912 | FALSE | 2.246151 | FALSE | Photoreceptor          |
| AATGAAG  | db/db1 | db/db | 6139 | 0.016181 | FALSE | 0.645116 | FALSE | Photoreceptor          |
| AATGAAG  | db/db1 | db/db | 1425 | 0.114406 | TRUE  | 2.746092 | FALSE |                        |
| AATGAAG  | db/db1 | db/db | 1971 | 0.024971 | FALSE | 0.883596 | FALSE | Photoreceptor          |
| AATGAAG  | db/db1 | db/db | 7202 | 0.031411 | FALSE | 0.630112 | FALSE | Photoreceptor          |
| AATGAAG  | db/db1 | db/db | 5715 | 0.032546 | FALSE | 0.563706 | FALSE | Photoreceptor          |
| AATGAAG  | db/db1 | db/db | 3606 | 0.057037 | FALSE | 1.079994 | FALSE | Photoreceptor          |
| AATGAAG  | db/db1 | db/db | 1728 | 0.012557 | FALSE | 1.016885 | FALSE | Endothelia Capillary E |
| AATGAAG  | db/db1 | db/db | 688  | 0.015581 | FALSE | 1.692899 | FALSE | Endothelia Aterial EC  |
| AATGACC  | db/db1 | db/db | 1917 | 0.025416 | FALSE | 1.439109 | FALSE | Endothelia EC-C4       |
| AATGACC  | db/db1 | db/db | 2012 | 0.013074 | FALSE | 1.082026 | FALSE | Endothelia EC-C4       |
| AATGACC  | db/db1 | db/db | 1390 | 0.023682 | FALSE | 0.321255 | FALSE | Photoreceptor          |
| AATGACC  | db/db1 | db/db | 2297 | 0.017434 | FALSE | 0.937857 | FALSE | Endothelia Capillary E |
| AATGACC  | db/db1 | db/db | 1560 | 0.058205 | FALSE | 1.515863 | FALSE | Endothelia Aterial EC  |
| AATGACT  | db/db1 | db/db | 6098 | 0.200401 | TRUE  | 1.207951 | FALSE |                        |
| AATGCCA  | db/db1 | db/db | 3447 | 0.030859 | FALSE | 0.756365 | FALSE | Endothelia Venous EC   |
| AATGCCA  | db/db1 | db/db | 1693 | 0.039671 | FALSE | 1.105981 | FALSE | Photoreceptor          |
| AATGCCA  | db/db1 | db/db | 501  | 0.054795 | FALSE | 6.818182 | TRUE  |                        |
| AATGGAA  | db/db1 | db/db | 1151 | 0.016488 | FALSE | 1.717249 | FALSE | Endothelia EC-C4       |
| AATGGAA  | db/db1 | db/db | 1242 | 0.146004 | TRUE  | 0.743494 | FALSE |                        |
| AATGGAA  | db/db1 | db/db | 4225 | 0.042704 | FALSE | 0.549295 | FALSE | Photoreceptor          |
| AATGGAA  | db/db1 | db/db | 608  | 0.04192  | FALSE | 1.515187 | FALSE | Neuron                 |
| AATGGAA  | db/db1 | db/db | 6847 | 0.143501 | TRUE  | 0.519063 | FALSE |                        |
| AATGGAA  | db/db1 | db/db | 2925 | 0.078788 | FALSE | 8.434894 | TRUE  |                        |
| AATGGAA  | db/db1 | db/db | 1231 | 0.011319 | FALSE | 1.188128 | FALSE | Endothelia Capillary E |
| AATGGAA  | db/db1 | db/db | 2421 | 0.019106 | FALSE | 1.072387 | FALSE | Endothelia Venous EC   |
| AATGGAA  | db/db1 | db/db | 1531 | 0.070386 | FALSE | 10.42105 | TRUE  |                        |
| AATGGAA  | db/db1 | db/db | 4275 | 0.034334 | FALSE | 0.645837 | FALSE | Photoreceptor          |
| AATGGAA  | db/db1 | db/db | 2977 | 0.119124 | TRUE  | 1.933067 | FALSE |                        |
| AATGGCT  | db/db1 | db/db | 1371 | 0.005607 | FALSE | 1.550837 | FALSE | Pericyte               |
| AATGGCT  | db/db1 | db/db | 2559 | 0.053718 | FALSE | 0.833206 | FALSE | Photoreceptor          |
| AATGGCT  | db/db1 | db/db | 5762 | 0.026328 | FALSE | 0.666201 | FALSE | Photoreceptor          |
| AATGGCT  | db/db1 | db/db | 4325 | 0.019455 | FALSE | 0.833314 | FALSE | Endothelia Capillary E |
| AATGGCT  | db/db1 | db/db | 1183 | 0.049679 | FALSE | 0.931769 | FALSE | Photoreceptor          |
| AATGGCT  | db/db1 | db/db | 1689 | 0.184701 | TRUE  | 6.465365 | TRUE  |                        |
| AATTCCTA | db/db1 | db/db | 1511 | 0.027273 | FALSE | 1.791608 | FALSE | Muller cell            |
| AATTCCTA | db/db1 | db/db | 2913 | 0.125386 | TRUE  | 3.578059 | FALSE |                        |
| AATTCCTC | db/db1 | db/db | 1949 | 0.076994 | FALSE | 0.389725 | FALSE | Photoreceptor          |
| AATTCCTC | db/db1 | db/db | 1823 | 0.010846 | FALSE | 1.39524  | FALSE | Endothelia Capillary E |
| AATTCCTG | db/db1 | db/db | 2166 | 0.025416 | FALSE | 0.989212 | FALSE | Endothelia Aterial EC  |
| AATTCCTG | db/db1 | db/db | 729  | 0.109954 | TRUE  | 4.40613  | FALSE |                        |
| AATTCCTG | db/db1 | db/db | 1529 | 0.031973 | FALSE | 1.528183 | FALSE | Photoreceptor          |
| AATTCCTT | db/db1 | db/db | 679  | 0.055901 | FALSE | 2.469739 | FALSE | Photoreceptor          |
| AATTTCCA | db/db1 | db/db | 902  | 0.065957 | FALSE | 1.175278 | FALSE | Photoreceptor          |

|                  |       |      |          |       |          |       |                        |
|------------------|-------|------|----------|-------|----------|-------|------------------------|
| AATTTCCA db/db1  | db/db | 1638 | 0.08663  | FALSE | 1.149336 | FALSE | Photoreceptor          |
| AATTTCCA db/db1  | db/db | 3834 | 0.025416 | FALSE | 0.636674 | FALSE | Photoreceptor          |
| AATTTCCA db/db1  | db/db | 4647 | 0.026796 | FALSE | 0.691317 | FALSE | Photoreceptor          |
| AATTTCCA db/db1  | db/db | 2112 | 0.023682 | FALSE | 1.06001  | FALSE | Endothelia Capillary E |
| AATTTCCC db/db1  | db/db | 3717 | 0.022059 | FALSE | 0.510575 | FALSE | Photoreceptor          |
| AATTTCCC db/db1  | db/db | 2483 | 0.008644 | FALSE | 1.046448 | FALSE | Endothelia EC-C4       |
| AATTTCCC db/db1  | db/db | 3736 | 0.022059 | FALSE | 0.87296  | FALSE | Endothelia EC-C4       |
| AATTTCCG db/db1  | db/db | 922  | 0.084562 | FALSE | 1.339012 | FALSE | Photoreceptor          |
| AATTTCCCT db/db1 | db/db | 418  | 0.046025 | FALSE | 4.532317 | FALSE | Endothelia Capillary E |
| AATTTCCCT db/db1 | db/db | 1817 | 0.048732 | FALSE | 1.302697 | FALSE | Photoreceptor          |
| AATTTCCCT db/db1 | db/db | 3522 | 0.028251 | FALSE | 0.898441 | FALSE | Photoreceptor          |
| ACAAAGA db/db1   | db/db | 2758 | 0.044326 | FALSE | 0.84554  | FALSE | Photoreceptor          |
| ACAAAGA db/db1   | db/db | 762  | 0.037564 | FALSE | 0.599308 | FALSE | Photoreceptor          |
| ACAAAGA db/db1   | db/db | 1359 | 0.040404 | FALSE | 1.211983 | FALSE | Photoreceptor          |
| ACAAAGA db/db1   | db/db | 824  | 0.131994 | TRUE  | 3.926941 | FALSE |                        |
| ACAAAGA db/db1   | db/db | 1176 | 0.139562 | TRUE  | 0.306654 | FALSE |                        |
| ACAAAGA db/db1   | db/db | 1875 | 0.026328 | FALSE | 1.230901 | FALSE | Endothelia Capillary E |
| ACAAAGA db/db1   | db/db | 3448 | 0.036232 | FALSE | 1.033468 | FALSE | Photoreceptor          |
| ACAAAGA db/db1   | db/db | 463  | 0.08663  | FALSE | 3.352818 | FALSE | Muller cell            |
| ACAAAGA db/db1   | db/db | 1186 | 0.018422 | FALSE | 1.245882 | FALSE | Endothelia Capillary E |
| ACAAAGA db/db1   | db/db | 1680 | 0.008032 | FALSE | 0.910983 | FALSE | Endothelia EC-C4       |
| ACAAAGA db/db1   | db/db | 1669 | 0.071958 | FALSE | 1.095801 | FALSE | Photoreceptor          |
| ACAAAGA db/db1   | db/db | 1259 | 0.018761 | FALSE | 0.787614 | FALSE | Photoreceptor          |
| ACAAAGA db/db1   | db/db | 8466 | 0.033726 | FALSE | 0.520792 | FALSE | Photoreceptor          |
| ACAACCA db/db1   | db/db | 3584 | 0.034954 | FALSE | 1.164415 | FALSE | Photoreceptor          |
| ACAACCA db/db1   | db/db | 761  | 0.034954 | FALSE | 0.77766  | FALSE | Photoreceptor          |
| ACAACCA db/db1   | db/db | 4131 | 0.314286 | TRUE  | 2.275313 | FALSE |                        |
| ACAACCA db/db1   | db/db | 4247 | 0.012557 | FALSE | 0.503405 | FALSE | Photoreceptor          |
| ACAACCA db/db1   | db/db | 531  | 0.019106 | FALSE | 0.175297 | FALSE | Photoreceptor          |
| ACAACCA db/db1   | db/db | 4671 | 0.011805 | FALSE | 1.039394 | FALSE | Photoreceptor          |
| ACAACCA db/db1   | db/db | 1544 | 0.023266 | FALSE | 1.030493 | FALSE | Photoreceptor          |
| ACAAGCT db/db1   | db/db | 7553 | 0.022059 | FALSE | 0.406679 | FALSE | Photoreceptor          |
| ACAAGCT db/db1   | db/db | 3033 | 0.071958 | FALSE | 1.093321 | FALSE | Photoreceptor          |
| ACAAGCT db/db1   | db/db | 558  | 0.042704 | FALSE | 1.596406 | FALSE | Photoreceptor          |
| ACAAGCT db/db1   | db/db | 421  | 0.075259 | FALSE | 3.292505 | FALSE | Photoreceptor          |
| ACAAGCT db/db1   | db/db | 811  | 0.064568 | FALSE | 1.820243 | FALSE | Photoreceptor          |
| ACAAGCT db/db1   | db/db | 2034 | 0.046025 | FALSE | 1.261832 | FALSE | Endothelia Venous EC   |
| ACAAGCT db/db1   | db/db | 639  | 0.003345 | FALSE | 1.648172 | FALSE | Pericyte               |
| ACACAGT db/db1   | db/db | 1419 | 0.031411 | FALSE | 0.502852 | FALSE | Photoreceptor          |
| ACACAGT db/db1   | db/db | 441  | 0.03313  | FALSE | 3.661251 | FALSE | Muller cell            |
| ACACAGT db/db1   | db/db | 1590 | 0.044326 | FALSE | 0.473167 | FALSE | Photoreceptor          |
| ACACAGT db/db1   | db/db | 810  | 0.045165 | FALSE | 2.016969 | FALSE | Photoreceptor          |
| ACACAGT db/db1   | db/db | 4329 | 0.020171 | FALSE | 0.869339 | FALSE | Photoreceptor          |
| ACACAGT db/db1   | db/db | 1608 | 0.013605 | FALSE | 1.710696 | FALSE | Endothelia Aterial EC  |
| ACACAGT db/db1   | db/db | 1909 | 0.17103  | TRUE  | 4.927302 | FALSE |                        |
| ACACCAA db/db1   | db/db | 5748 | 0.026328 | FALSE | 0.658771 | FALSE | Photoreceptor          |
| ACACCAAC db/db1  | db/db | 2018 | 0.044326 | FALSE | 1.221035 | FALSE | Pericyte               |

|          |        |       |      |          |       |          |       |                        |
|----------|--------|-------|------|----------|-------|----------|-------|------------------------|
| ACACCAAC | db/db1 | db/db | 3360 | 0.021286 | FALSE | 0.419959 | FALSE | Photoreceptor          |
| ACACCAAT | db/db1 | db/db | 3406 | 0.011805 | FALSE | 0.405138 | FALSE | Photoreceptor          |
| ACACGCG  | db/db1 | db/db | 4153 | 0.159016 | TRUE  | 1.969436 | FALSE |                        |
| ACACGCG  | db/db1 | db/db | 5212 | 0.015287 | FALSE | 0.460384 | FALSE | Photoreceptor          |
| ACACGCG  | db/db1 | db/db | 1608 | 0.05065  | FALSE | 1.141836 | FALSE | Photoreceptor          |
| ACACGCG  | db/db1 | db/db | 4571 | 0.095727 | FALSE | 0.605751 | FALSE | Photoreceptor          |
| ACACGCG  | db/db1 | db/db | 6512 | 0.014711 | FALSE | 0.261779 | FALSE | Photoreceptor          |
| ACACGCG  | db/db1 | db/db | 1474 | 0.010384 | FALSE | 1.50136  | FALSE | Endothelia Capillary E |
| ACACGCG  | db/db1 | db/db | 1207 | 0.011561 | FALSE | 1.006327 | FALSE | Endothelia Capillary E |
| ACACGCG  | db/db1 | db/db | 1468 | 0.018761 | FALSE | 1.149297 | FALSE | Endothelia Capillary E |
| ACACGCG  | db/db1 | db/db | 8702 | 0.015879 | FALSE | 0.437115 | FALSE | Photoreceptor          |
| ACACGCG  | db/db1 | db/db | 6569 | 0.021286 | FALSE | 0.590736 | FALSE | Photoreceptor          |
| ACACGCG  | db/db1 | db/db | 1426 | 0.053718 | FALSE | 1.132958 | FALSE | Photoreceptor          |
| ACACTGAC | db/db1 | db/db | 1213 | 0.043505 | FALSE | 0.836135 | FALSE | Photoreceptor          |
| ACACTGAC | db/db1 | db/db | 828  | 0.148377 | TRUE  | 10.00855 | TRUE  |                        |
| ACACTGAC | db/db1 | db/db | 1109 | 0.137569 | TRUE  | 3.905325 | FALSE |                        |
| ACACTGAC | db/db1 | db/db | 2211 | 0.030859 | FALSE | 0.815713 | FALSE | Photoreceptor          |
| ACACTGAT | db/db1 | db/db | 3903 | 0.013074 | FALSE | 0.554385 | FALSE | Photoreceptor          |
| ACAGAAA  | db/db1 | db/db | 2620 | 0.098234 | FALSE | 1.246942 | FALSE | Neuron                 |
| ACAGAAA  | db/db1 | db/db | 4421 | 0.012052 | FALSE | 0.759571 | FALSE | Endothelia Venous EC   |
| ACAGAAA  | db/db1 | db/db | 5017 | 0.052669 | FALSE | 0.783934 | FALSE | Endothelia Venous EC   |
| ACAGAAA  | db/db1 | db/db | 420  | 0.046025 | FALSE | 2.463508 | FALSE | Photoreceptor          |
| ACAGAAA  | db/db1 | db/db | 1968 | 0.046906 | FALSE | 1.476983 | FALSE | Endothelia Capillary E |
| ACAGAAA  | db/db1 | db/db | 698  | 0.04192  | FALSE | 2.821754 | FALSE | Endothelia Capillary E |
| ACAGAAA  | db/db1 | db/db | 1281 | 0.040404 | FALSE | 1.756896 | FALSE | Muller cell            |
| ACAGAAA  | db/db1 | db/db | 2525 | 0.078788 | FALSE | 0.82843  | FALSE | Neuron                 |
| ACAGCCG  | db/db1 | db/db | 4773 | 0.093319 | FALSE | 0.996957 | FALSE | Endothelia Venous EC   |
| ACAGCCG  | db/db1 | db/db | 794  | 0.08663  | FALSE | 3.206391 | FALSE | Photoreceptor          |
| ACAGCCG  | db/db1 | db/db | 703  | 0.033726 | FALSE | 1.48478  | FALSE | Photoreceptor          |
| ACAGCCG  | db/db1 | db/db | 462  | 0.037564 | FALSE | 2.26179  | FALSE | Photoreceptor          |
| ACAGCCG  | db/db1 | db/db | 685  | 0.093319 | FALSE | 12.657   | TRUE  |                        |
| ACAGCCG  | db/db1 | db/db | 2436 | 0.013074 | FALSE | 1.333783 | FALSE | Endothelia Capillary E |
| ACAGGGA  | db/db1 | db/db | 1348 | 0.015581 | FALSE | 1.111238 | FALSE | Endothelia Capillary E |
| ACAGGGA  | db/db1 | db/db | 855  | 0.023682 | FALSE | 0.90906  | FALSE | Photoreceptor          |
| ACAGGGA  | db/db1 | db/db | 554  | 0.091004 | FALSE | 2.586801 | FALSE | Photoreceptor          |
| ACAGGGA  | db/db1 | db/db | 2439 | 0.024534 | FALSE | 0.953719 | FALSE | Endothelia EC-C4       |
| ACAGGGA  | db/db1 | db/db | 419  | 0.068864 | FALSE | 11.09091 | TRUE  |                        |
| ACAGGGA  | db/db1 | db/db | 450  | 0.119568 | TRUE  | 4.174229 | FALSE |                        |
| ACAGGGA  | db/db1 | db/db | 1396 | 0.098234 | FALSE | 8.147175 | TRUE  |                        |
| ACAGGGA  | db/db1 | db/db | 3924 | 0.028754 | FALSE | 0.754633 | FALSE | Photoreceptor          |
| ACAGGGA  | db/db1 | db/db | 2027 | 0.107669 | TRUE  | 2.275121 | FALSE |                        |
| ACAGGGA  | db/db1 | db/db | 2470 | 0.039671 | FALSE | 1.21355  | FALSE | Photoreceptor          |
| ACAGGGA  | db/db1 | db/db | 3093 | 0.040404 | FALSE | 0.917316 | FALSE | Endothelia Capillary E |
| ACATCCCA | db/db1 | db/db | 994  | 0.130374 | TRUE  | 11.92331 | TRUE  |                        |
| ACATCCCA | db/db1 | db/db | 3515 | 0.052669 | FALSE | 0.88911  | FALSE | Photoreceptor          |
| ACATCCCG | db/db1 | db/db | 961  | 0.022857 | FALSE | 1.393129 | FALSE | Endothelia Capillary E |
| ACATCCCG | db/db1 | db/db | 1803 | 0.017434 | FALSE | 0.949048 | FALSE | Endothelia Aterial EC  |

|                  |       |      |          |       |          |       |                         |
|------------------|-------|------|----------|-------|----------|-------|-------------------------|
| ACATCCCT db/db1  | db/db | 2762 | 0.011561 | FALSE | 0.991804 | FALSE | Endothelia Venous EC    |
| ACATCGA db/db1   | db/db | 4496 | 0.01981  | FALSE | 0.602711 | FALSE | Photoreceptor           |
| ACATCGAC db/db1  | db/db | 4532 | 0.014997 | FALSE | 0.888964 | FALSE | Endothelia Capillary EC |
| ACATCGAC db/db1  | db/db | 3270 | 0.033726 | FALSE | 0.827801 | FALSE | Photoreceptor           |
| ACATCGAC db/db1  | db/db | 1788 | 0.103732 | TRUE  | 1.571323 | FALSE |                         |
| ACATCGAC db/db1  | db/db | 6069 | 0.026328 | FALSE | 0.798977 | FALSE | Photoreceptor           |
| ACATCGAC db/db1  | db/db | 2294 | 0.046025 | FALSE | 1.127985 | FALSE | Endothelia Capillary EC |
| ACATCGAT db/db1  | db/db | 2834 | 0.057037 | FALSE | 1.274644 | FALSE | Endothelia Capillary EC |
| ACATCGAT db/db1  | db/db | 841  | 0.004927 | FALSE | 2.011726 | FALSE | Pericyte                |
| ACATCGAT db/db1  | db/db | 6278 | 0.019455 | FALSE | 0.282936 | FALSE | Photoreceptor           |
| ACATCGAT db/db1  | db/db | 3036 | 0.048732 | FALSE | 0.768212 | FALSE | Photoreceptor           |
| ACATCGAT db/db1  | db/db | 587  | 0.023682 | FALSE | 1.741554 | FALSE | Photoreceptor           |
| ACATCGAT db/db1  | db/db | 471  | 0.04192  | FALSE | 1.140204 | FALSE | Photoreceptor           |
| ACATCGAT db/db1  | db/db | 436  | 0.082569 | FALSE | 3.855671 | FALSE | Photoreceptor           |
| ACATCGAT db/db1  | db/db | 3572 | 0.018761 | FALSE | 0.869255 | FALSE | Photoreceptor           |
| ACATCGAT db/db1  | db/db | 706  | 0.080645 | FALSE | 1.692693 | FALSE | Endothelia Capillary EC |
| ACATCGAT db/db1  | db/db | 466  | 0.030318 | FALSE | 4.172044 | FALSE | Muller cell             |
| ACATGCA db/db1   | db/db | 563  | 0.012303 | FALSE | 1.657829 | FALSE | Neuron                  |
| ACATGCA db/db1   | db/db | 1383 | 0.009493 | FALSE | 1.255953 | FALSE | Endothelia Capillary EC |
| ACATGCA db/db1   | db/db | 1505 | 0.010614 | FALSE | 0.939209 | FALSE | Endothelia Capillary EC |
| ACATGCAC db/db1  | db/db | 1457 | 0.098234 | FALSE | 1.547794 | FALSE | Endothelia Capillary EC |
| ACATGCAC db/db1  | db/db | 1451 | 0.046025 | FALSE | 1.687514 | FALSE | Photoreceptor           |
| ACATGCAC db/db1  | db/db | 1739 | 0.013876 | FALSE | 0.955159 | FALSE | Endothelia Capillary EC |
| ACATGCAC db/db1  | db/db | 443  | 0.016181 | FALSE | 1.034042 | FALSE | Photoreceptor           |
| ACATGCAC db/db1  | db/db | 4174 | 0.026796 | FALSE | 1.016711 | FALSE | Photoreceptor           |
| ACATGCAT db/db1  | db/db | 415  | 0.093319 | FALSE | 9.310987 | TRUE  |                         |
| ACATGCAT db/db1  | db/db | 4732 | 0.036891 | FALSE | 0.848255 | FALSE | Photoreceptor           |
| ACATTTCA db/db1  | db/db | 3972 | 0.143776 | TRUE  | 1.950263 | FALSE |                         |
| ACATTTCA db/db1  | db/db | 379  | 0.05065  | FALSE | 2.465565 | FALSE | Endothelia Capillary EC |
| ACATTTCA db/db1  | db/db | 1296 | 0.017114 | FALSE | 1.044939 | FALSE | Endothelia EC-C4        |
| ACATTTCC db/db1  | db/db | 3464 | 0.028754 | FALSE | 0.951109 | FALSE | Endothelia EC-C4        |
| ACATTTCC db/db1  | db/db | 3282 | 0.024971 | FALSE | 0.853388 | FALSE | Endothelia EC-C4        |
| ACATTTCCG db/db1 | db/db | 2960 | 0.029787 | FALSE | 1.165682 | FALSE | Photoreceptor           |
| ACATTTCT db/db1  | db/db | 7376 | 0.014711 | FALSE | 0.150349 | FALSE | Photoreceptor           |
| ACATTTCT db/db1  | db/db | 1269 | 0.045165 | FALSE | 1.594632 | FALSE | Photoreceptor           |
| ACCAAACC db/db1  | db/db | 480  | 0.046906 | FALSE | 2.01179  | FALSE | Muller cell             |
| ACCAAACC db/db1  | db/db | 518  | 0.084562 | FALSE | 2.172346 | FALSE | Photoreceptor           |
| ACCAAACC db/db1  | db/db | 871  | 0.034954 | FALSE | 0.674081 | FALSE | Photoreceptor           |
| ACCAAACC db/db1  | db/db | 991  | 0.030859 | FALSE | 0.267866 | FALSE | Photoreceptor           |
| ACCAAACC db/db1  | db/db | 607  | 0.031973 | FALSE | 2.454527 | FALSE | Photoreceptor           |
| ACCAAACC db/db1  | db/db | 2672 | 0.013876 | FALSE | 0.864493 | FALSE | Photoreceptor           |
| ACCAAACCT db/db1 | db/db | 1221 | 0.016181 | FALSE | 1.329764 | FALSE | Endothelia Capillary EC |
| ACCAAACCT db/db1 | db/db | 1566 | 0.046906 | FALSE | 0.76648  | FALSE | Photoreceptor           |
| ACCAACA db/db1   | db/db | 6415 | 0.036232 | FALSE | 0.865937 | FALSE | Photoreceptor           |
| ACCAACA db/db1   | db/db | 872  | 0.030318 | FALSE | 0.517787 | FALSE | Photoreceptor           |
| ACCAACAC db/db1  | db/db | 899  | 0.054795 | FALSE | 2.13733  | FALSE | Photoreceptor           |
| ACCAACAC db/db1  | db/db | 490  | 0.018088 | FALSE | 1.398785 | FALSE | Endothelia Capillary EC |

|                 |       |      |          |       |          |       |                        |
|-----------------|-------|------|----------|-------|----------|-------|------------------------|
| ACCAACAC db/db1 | db/db | 512  | 0.073582 | FALSE | 1.203389 | FALSE | Muller cell            |
| ACCAACAC db/db1 | db/db | 2005 | 0.143501 | TRUE  | 1.577287 | FALSE |                        |
| ACCAACAT db/db1 | db/db | 1906 | 0.024534 | FALSE | 1.138266 | FALSE | Endothelia Capillary E |
| ACCAACAT db/db1 | db/db | 5803 | 0.093319 | FALSE | 0.719371 | FALSE | Endothelia Venous EC   |
| ACCACAA db/db1  | db/db | 955  | 0.015581 | FALSE | 1.690664 | FALSE | Endothelia Capillary E |
| ACCACAA db/db1  | db/db | 2747 | 0.033726 | FALSE | 0.514448 | FALSE | Photoreceptor          |
| ACCACAA db/db1  | db/db | 9160 | 0.017434 | FALSE | 0.194277 | FALSE | Photoreceptor          |
| ACCACAA db/db1  | db/db | 1826 | 0.126958 | TRUE  | 1.979321 | FALSE |                        |
| ACCACAA db/db1  | db/db | 4952 | 0.028754 | FALSE | 0.892515 | FALSE | Photoreceptor          |
| ACCACAA db/db1  | db/db | 8028 | 0.184701 | TRUE  | 1.200585 | FALSE |                        |
| ACCACAA db/db1  | db/db | 514  | 0.051646 | FALSE | 2.536885 | FALSE | Pericyte               |
| ACCACAAT db/db1 | db/db | 2189 | 0.058205 | FALSE | 1.074212 | FALSE | Endothelia Venous EC   |
| ACCACAAT db/db1 | db/db | 977  | 0.031973 | FALSE | 1.567652 | FALSE | Photoreceptor          |
| ACCACAAT db/db1 | db/db | 2677 | 0.021286 | FALSE | 0.952688 | FALSE | Endothelia Capillary E |
| ACCACAAT db/db1 | db/db | 723  | 0.04192  | FALSE | 3.314993 | FALSE | Muller cell            |
| ACCATTTA db/db1 | db/db | 1044 | 0.055901 | FALSE | 1.193523 | FALSE | Photoreceptor          |
| ACCATTTA db/db1 | db/db | 5191 | 0.020171 | FALSE | 1.033569 | FALSE | Photoreceptor          |
| ACCATTTA db/db1 | db/db | 2050 | 0.063221 | FALSE | 0.92616  | FALSE | Photoreceptor          |
| ACCATTTA db/db1 | db/db | 3387 | 0.012814 | FALSE | 0.965768 | FALSE | Endothelia Capillary E |
| ACCATTTA db/db1 | db/db | 4620 | 0.013876 | FALSE | 0.80857  | FALSE | Photoreceptor          |
| ACCATTTC db/db1 | db/db | 700  | 0.027758 | FALSE | 2.026669 | FALSE | Photoreceptor          |
| ACCATTTC db/db1 | db/db | 3218 | 0.027758 | FALSE | 0.471569 | FALSE | Photoreceptor          |
| ACCATTTG db/db1 | db/db | 4232 | 0.061912 | FALSE | 0.845704 | FALSE | Photoreceptor          |
| ACCATTTG db/db1 | db/db | 6620 | 0.026796 | FALSE | 0.49892  | FALSE | Photoreceptor          |
| ACCATTTG db/db1 | db/db | 6140 | 0.010384 | FALSE | 0.412668 | FALSE | Photoreceptor          |
| ACCCAAA db/db1  | db/db | 8066 | 0.030859 | FALSE | 0.64088  | FALSE | Photoreceptor          |
| ACCCAAA db/db1  | db/db | 2919 | 0.041154 | FALSE | 0.931455 | FALSE | Photoreceptor          |
| ACCCAAA db/db1  | db/db | 486  | 0.019455 | FALSE | 3.661251 | FALSE | Photoreceptor          |
| ACCCAAA db/db1  | db/db | 1692 | 0.046025 | FALSE | 0.532414 | FALSE | Photoreceptor          |
| ACCCAAAT db/db1 | db/db | 1266 | 0.143776 | TRUE  | 2.157895 | FALSE |                        |
| ACCCAAAT db/db1 | db/db | 1567 | 0.008644 | FALSE | 1.214421 | FALSE | Endothelia EC-C4       |
| ACCCTCAA db/db1 | db/db | 3266 | 0.034954 | FALSE | 0.800593 | FALSE | Photoreceptor          |
| ACCCTCAA db/db1 | db/db | 2279 | 0.020536 | FALSE | 0.890237 | FALSE | Photoreceptor          |
| ACCCTCAA db/db1 | db/db | 1714 | 0.020171 | FALSE | 1.20813  | FALSE | Endothelia Capillary E |
| ACCCTCAC db/db1 | db/db | 1336 | 0.054795 | FALSE | 1.815759 | FALSE | Endothelia Capillary E |
| ACCCTCAG db/db1 | db/db | 435  | 0.138889 | TRUE  | 7.617504 | TRUE  |                        |
| ACCCTCAG db/db1 | db/db | 850  | 0.063221 | FALSE | 1.33857  | FALSE | Photoreceptor          |
| ACCCTTGA db/db1 | db/db | 1772 | 0.101906 | TRUE  | 4.627949 | FALSE |                        |
| ACCCTTGA db/db1 | db/db | 1681 | 0.020171 | FALSE | 1.33867  | FALSE | Endothelia Capillary E |
| ACCCTTGA db/db1 | db/db | 580  | 0.029787 | FALSE | 0.161594 | FALSE | Photoreceptor          |
| ACCCTTGC db/db1 | db/db | 5769 | 0.08663  | FALSE | 0.438808 | FALSE | Neuron                 |
| ACCCTTGC db/db1 | db/db | 6192 | 0.020171 | FALSE | 0.460279 | FALSE | Photoreceptor          |
| ACCCTTGT db/db1 | db/db | 2753 | 0.020171 | FALSE | 1.076949 | FALSE | Endothelia Capillary E |
| ACCCTTGT db/db1 | db/db | 1867 | 0.084562 | FALSE | 1.572968 | FALSE | Photoreceptor          |
| ACCGTTCA db/db1 | db/db | 1367 | 0.049679 | FALSE | 1.749557 | FALSE | Endothelia Capillary E |
| ACCGTTCC db/db1 | db/db | 1549 | 0.013876 | FALSE | 1.410341 | FALSE | Endothelia Capillary E |
| ACCGTTCC db/db1 | db/db | 3842 | 0.014151 | FALSE | 1.166255 | FALSE | Neuron                 |

|                 |       |      |          |       |          |       |                        |
|-----------------|-------|------|----------|-------|----------|-------|------------------------|
| ACCTACCA db/db1 | db/db | 1590 | 0.018761 | FALSE | 1.439971 | FALSE | Endothelia Capillary E |
| ACCTACCC db/db1 | db/db | 965  | 0.049679 | FALSE | 0.731062 | FALSE | Photoreceptor          |
| ACCTACCC db/db1 | db/db | 3037 | 0.025416 | FALSE | 1.051424 | FALSE | Endothelia Capillary E |
| ACCTACCC db/db1 | db/db | 473  | 0.093319 | FALSE | 3.84666  | FALSE | Photoreceptor          |
| ACCTACCG db/db1 | db/db | 791  | 0.068864 | FALSE | 13.50278 | TRUE  |                        |
| ACCTACCG db/db1 | db/db | 2108 | 0.017758 | FALSE | 1.197105 | FALSE | Endothelia EC-C4       |
| ACCTACCG db/db1 | db/db | 1940 | 0.037564 | FALSE | 1.297624 | FALSE | Endothelia Venous EC   |
| ACCTACCG db/db1 | db/db | 2679 | 0.067388 | FALSE | 1.012832 | FALSE | Endothelia EC-C4       |
| ACCTACCG db/db1 | db/db | 466  | 0.021286 | FALSE | 0.815378 | FALSE | Photoreceptor          |
| ACCTACCT db/db1 | db/db | 731  | 0.01981  | FALSE | 0.248283 | FALSE | Photoreceptor          |
| ACCTACCT db/db1 | db/db | 1986 | 0.038251 | FALSE | 1.294387 | FALSE | Neuron                 |
| ACCTACCT db/db1 | db/db | 873  | 0.030318 | FALSE | 0.595797 | FALSE | Photoreceptor          |
| ACCTACCT db/db1 | db/db | 899  | 0.032546 | FALSE | 1.145224 | FALSE | Photoreceptor          |
| ACCTACCT db/db1 | db/db | 8850 | 0.009063 | FALSE | 0.546049 | FALSE | Photoreceptor          |
| ACCTACCT db/db1 | db/db | 4244 | 0.008438 | FALSE | 0.803786 | FALSE | Endothelia EC-C4       |
| ACCTGAA db/db1  | db/db | 922  | 0.17103  | TRUE  | 1.269841 | FALSE |                        |
| ACCTGAA db/db1  | db/db | 3672 | 0.184701 | TRUE  | 2.421668 | FALSE |                        |
| ACCTGAA db/db1  | db/db | 727  | 0.051646 | FALSE | 1.610133 | FALSE | Photoreceptor          |
| ACCTGAA db/db1  | db/db | 578  | 0.120957 | TRUE  | 1.474531 | FALSE |                        |
| ACCTGAA db/db1  | db/db | 1479 | 0.038251 | FALSE | 0.759145 | FALSE | Photoreceptor          |
| ACCTGAAC db/db1 | db/db | 3618 | 0.03313  | FALSE | 0.766728 | FALSE | Photoreceptor          |
| ACCTGAAC db/db1 | db/db | 1176 | 0.059406 | FALSE | 0.81841  | FALSE | Photoreceptor          |
| ACCTGAAC db/db1 | db/db | 7252 | 0.031411 | FALSE | 0.629454 | FALSE | Photoreceptor          |
| ACCTGAAC db/db1 | db/db | 3268 | 0.009933 | FALSE | 1.292016 | FALSE | Photoreceptor          |
| ACCTGAAC db/db1 | db/db | 3229 | 0.035586 | FALSE | 0.90234  | FALSE | Microglia              |
| ACCTGAAT db/db1 | db/db | 3006 | 0.00687  | FALSE | 0.70795  | FALSE | Endothelia EC-C4       |
| ACCTGAAT db/db1 | db/db | 1551 | 0.040404 | FALSE | 0.670157 | FALSE | Microglia              |
| ACCTGAAT db/db1 | db/db | 3480 | 0.051646 | FALSE | 0.96893  | FALSE | Neuron                 |
| ACCTGTCA db/db1 | db/db | 1683 | 0.011561 | FALSE | 0.66295  | FALSE | Endothelia Capillary E |
| ACCTGTCC db/db1 | db/db | 8595 | 0.070386 | FALSE | 0.649525 | FALSE | Photoreceptor          |
| ACCTGTCC db/db1 | db/db | 2250 | 0.101906 | TRUE  | 3.284141 | FALSE |                        |
| ACCTGTCC db/db1 | db/db | 463  | 0.019455 | FALSE | 0.673548 | FALSE | Photoreceptor          |
| ACCTGTCC db/db1 | db/db | 8158 | 0.031973 | FALSE | 0.461481 | FALSE | Photoreceptor          |
| ACCTGTCC db/db1 | db/db | 3774 | 0.027758 | FALSE | 0.858249 | FALSE | Endothelia Capillary E |
| ACCTGTCC db/db1 | db/db | 460  | 0.04192  | FALSE | 1.385301 | FALSE | Photoreceptor          |
| ACCTGTCC db/db1 | db/db | 2945 | 0.037564 | FALSE | 1.158426 | FALSE | Endothelia Capillary E |
| ACCTGTCC db/db1 | db/db | 2463 | 0.028754 | FALSE | 0.822832 | FALSE | Photoreceptor          |
| ACCTGTCT db/db1 | db/db | 1527 | 0.128582 | TRUE  | 4.847645 | FALSE |                        |
| ACCTGTCT db/db1 | db/db | 8053 | 0.016181 | FALSE | 0.332028 | FALSE | Photoreceptor          |
| ACCTGTCT db/db1 | db/db | 1496 | 0.024971 | FALSE | 1.153689 | FALSE | Pericyte               |
| ACCTGTCT db/db1 | db/db | 4802 | 0.078788 | FALSE | 0.883636 | FALSE | Endothelia Capillary E |
| ACGATCA db/db1  | db/db | 1874 | 0.024105 | FALSE | 1.279009 | FALSE | Endothelia EC-C4       |
| ACGATCA db/db1  | db/db | 4073 | 0.038953 | FALSE | 1.013343 | FALSE | Photoreceptor          |
| ACGATCA db/db1  | db/db | 4597 | 0.025416 | FALSE | 0.988669 | FALSE | Endothelia Venous EC   |
| ACGATCA db/db1  | db/db | 792  | 0.025416 | FALSE | 0.995436 | FALSE | Pericyte               |
| ACGATCA db/db1  | db/db | 4862 | 0.028251 | FALSE | 0.80303  | FALSE | Photoreceptor          |
| ACGATCA db/db1  | db/db | 3026 | 0.010384 | FALSE | 0.931492 | FALSE | Endothelia Capillary E |

|          |        |       |      |          |       |          |       |                        |
|----------|--------|-------|------|----------|-------|----------|-------|------------------------|
| ACGATCAC | db/db1 | db/db | 1538 | 0.013876 | FALSE | 1.142926 | FALSE | Endothelia EC-C4       |
| ACGATCAT | db/db1 | db/db | 7691 | 0.018088 | FALSE | 0.596649 | FALSE | Photoreceptor          |
| ACGATCAT | db/db1 | db/db | 3415 | 0.024534 | FALSE | 0.955585 | FALSE | Photoreceptor          |
| ACGATCAT | db/db1 | db/db | 410  | 0.024534 | FALSE | 3.049095 | FALSE | Muller cell            |
| ACGATCAT | db/db1 | db/db | 1493 | 0.028754 | FALSE | 1.409122 | FALSE | Endothelia Capillary E |
| ACGATCAT | db/db1 | db/db | 2229 | 0.038953 | FALSE | 1.023989 | FALSE | Photoreceptor          |
| ACGATGT  | db/db1 | db/db | 1203 | 0.034334 | FALSE | 1.8085   | FALSE | Endothelia Capillary E |
| ACGATGT  | db/db1 | db/db | 1280 | 0.059406 | FALSE | 1.802063 | FALSE | Photoreceptor          |
| ACGATGTC | db/db1 | db/db | 900  | 0.033726 | FALSE | 2.072489 | FALSE | Muller cell            |
| ACGATGTC | db/db1 | db/db | 560  | 0.068864 | FALSE | 1.815166 | FALSE | Endothelia Venous EC   |
| ACGATGTC | db/db1 | db/db | 2021 | 0.101906 | TRUE  | 4.20094  | FALSE |                        |
| ACGATGTC | db/db1 | db/db | 389  | 0.061912 | FALSE | 4.035357 | FALSE | Muller cell            |
| ACGATGTC | db/db1 | db/db | 918  | 0.031973 | FALSE | 2.205156 | FALSE | Endothelia Capillary E |
| ACGATGTC | db/db1 | db/db | 8166 | 0.017758 | FALSE | 0.384849 | FALSE | Photoreceptor          |
| ACGATGTC | db/db1 | db/db | 418  | 0.028754 | FALSE | 1.732019 | FALSE | Photoreceptor          |
| ACGATGTC | db/db1 | db/db | 6779 | 0.019106 | FALSE | 0.42718  | FALSE | Photoreceptor          |
| ACGATGTI | db/db1 | db/db | 1605 | 0.034334 | FALSE | 0.84064  | FALSE | Photoreceptor          |
| ACGATGTI | db/db1 | db/db | 1876 | 0.020536 | FALSE | 1.018472 | FALSE | Endothelia Aterial EC  |
| ACGATGTI | db/db1 | db/db | 371  | 0.100845 | TRUE  | 7.047619 | TRUE  |                        |
| ACGCACG  | db/db1 | db/db | 709  | 0.061912 | FALSE | 2.278419 | FALSE | Photoreceptor          |
| ACGCACG  | db/db1 | db/db | 1725 | 0.125386 | TRUE  | 3.467799 | FALSE |                        |
| ACGCACG  | db/db1 | db/db | 2785 | 0.013074 | FALSE | 1.234312 | FALSE | Photoreceptor          |
| ACGCACG  | db/db1 | db/db | 720  | 0.058205 | FALSE | 0.919008 | FALSE | Photoreceptor          |
| ACGCACG  | db/db1 | db/db | 502  | 0.046025 | FALSE | 1.986238 | FALSE | Endothelia Capillary E |
| ACGCACG  | db/db1 | db/db | 433  | 0.265464 | TRUE  | 6.909091 | TRUE  |                        |
| ACGCACG  | db/db1 | db/db | 1348 | 0.021286 | FALSE | 0.90911  | FALSE | Endothelia EC-C4       |
| ACGCACG  | db/db1 | db/db | 503  | 0.159016 | TRUE  | 13.38583 | TRUE  |                        |
| ACGCACG  | db/db1 | db/db | 2958 | 0.040404 | FALSE | 1.006052 | FALSE | Photoreceptor          |
| ACGCACG  | db/db1 | db/db | 2807 | 0.060641 | FALSE | 0.640913 | FALSE | Photoreceptor          |
| ACGGAAG  | db/db1 | db/db | 516  | 0.445833 | TRUE  | 1.102362 | FALSE |                        |
| ACGGAAG  | db/db1 | db/db | 2059 | 0.014429 | FALSE | 0.843887 | FALSE | Endothelia Aterial EC  |
| ACGGAAG  | db/db1 | db/db | 4418 | 0.027273 | FALSE | 0.844069 | FALSE | Endothelia EC-C4       |
| ACGGGTC  | db/db1 | db/db | 783  | 0.053718 | FALSE | 0.927591 | FALSE | Photoreceptor          |
| ACGGGTC  | db/db1 | db/db | 5279 | 0.13452  | TRUE  | 2.112904 | FALSE |                        |
| ACGGGTC  | db/db1 | db/db | 1176 | 0.103567 | TRUE  | 12.83096 | TRUE  |                        |
| ACGGGTC  | db/db1 | db/db | 2180 | 0.135645 | TRUE  | 3.399097 | FALSE |                        |
| ACGGGTC  | db/db1 | db/db | 2379 | 0.034334 | FALSE | 0.729176 | FALSE | Photoreceptor          |
| ACGGGTC  | db/db1 | db/db | 389  | 0.030859 | FALSE | 10.38462 | TRUE  |                        |
| ACGGGTC  | db/db1 | db/db | 3760 | 0.014429 | FALSE | 1.038891 | FALSE | Endothelia Venous EC   |
| ACGGGTC  | db/db1 | db/db | 473  | 0.138889 | TRUE  | 10.61047 | TRUE  |                        |
| ACGGGTC  | db/db1 | db/db | 1678 | 0.011805 | FALSE | 1.294422 | FALSE | Endothelia Aterial EC  |
| ACGGGTC  | db/db1 | db/db | 1245 | 0.047807 | FALSE | 1.714343 | FALSE | Endothelia Capillary E |
| ACGGGTC  | db/db1 | db/db | 671  | 0.031973 | FALSE | 1.922896 | FALSE | Photoreceptor          |
| ACGGGTC  | db/db1 | db/db | 790  | 0.13452  | TRUE  | 1.839927 | FALSE |                        |
| ACGGTCG  | db/db1 | db/db | 720  | 0.052669 | FALSE | 1.521842 | FALSE | Photoreceptor          |
| ACGGTCG  | db/db1 | db/db | 1925 | 0.024971 | FALSE | 1.311109 | FALSE | Endothelia Venous EC   |
| ACGGTCG  | db/db1 | db/db | 7518 | 0.164835 | TRUE  | 1.311793 | FALSE |                        |



|                 |       |      |          |       |          |       |                        |
|-----------------|-------|------|----------|-------|----------|-------|------------------------|
| ACGGTCG/db/db1  | db/db | 1140 | 0.055901 | FALSE | 1.045804 | FALSE | Photoreceptor          |
| ACGGTCG/db/db1  | db/db | 718  | 0.034334 | FALSE | 3.895261 | FALSE | Neuron                 |
| ACGGTCG/db/db1  | db/db | 3831 | 0.042704 | FALSE | 0.969672 | FALSE | Photoreceptor          |
| ACGGTCG/db/db1  | db/db | 808  | 0.044326 | FALSE | 1.996444 | FALSE | Endothelia Venous EC   |
| ACGGTCG/db/db1  | db/db | 788  | 0.035586 | FALSE | 2.708942 | FALSE | Endothelia Venous EC   |
| ACGGTCG/db/db1  | db/db | 2294 | 0.028251 | FALSE | 1.263544 | FALSE | Pericyte               |
| ACGGTCG/db/db1  | db/db | 2960 | 0.051646 | FALSE | 0.82072  | FALSE | Photoreceptor          |
| ACGGTTA/db/db1  | db/db | 861  | 0.043505 | FALSE | 1.116581 | FALSE | Photoreceptor          |
| ACGGTTA/db/db1  | db/db | 4106 | 0.027758 | FALSE | 0.812438 | FALSE | Endothelia Venous EC   |
| ACGGTTA/db/db1  | db/db | 2963 | 0.030318 | FALSE | 0.999207 | FALSE | Endothelia Capillary E |
| ACGGTTA/db/db1  | db/db | 886  | 0.029787 | FALSE | 3.593019 | FALSE | Muller cell            |
| ACGGTTA/db/db1  | db/db | 1354 | 0.044326 | FALSE | 1.229164 | FALSE | Photoreceptor          |
| ACGGTTA/db/db1  | db/db | 4478 | 0.082569 | FALSE | 0.99882  | FALSE | Endothelia EC-C4       |
| ACGGTTA/db/db1  | db/db | 1440 | 0.007441 | FALSE | 1.076647 | FALSE | Endothelia EC-C4       |
| ACGTAAC/db/db1  | db/db | 838  | 0.033726 | FALSE | 0.843328 | FALSE | Photoreceptor          |
| ACGTAAC/db/db1  | db/db | 1167 | 0.006683 | FALSE | 1.775063 | FALSE | Pericyte               |
| ACGTAAC/db/db1  | db/db | 1380 | 0.135645 | TRUE  | 3.298279 | FALSE |                        |
| ACGTAAC/db/db1  | db/db | 2710 | 0.057037 | FALSE | 1.064192 | FALSE | Endothelia Venous EC   |
| ACGTAAC/db/db1  | db/db | 2291 | 0.034954 | FALSE | 0.975781 | FALSE | Photoreceptor          |
| ACGTAAC/db/db1  | db/db | 461  | 0.037564 | FALSE | 0.781586 | FALSE | Photoreceptor          |
| ACGTAAC/db/db1  | db/db | 382  | 0.063221 | FALSE | 3.76152  | FALSE | Photoreceptor          |
| ACGTAAC/db/db1  | db/db | 2246 | 0.014997 | FALSE | 1.109661 | FALSE | Endothelia Capillary E |
| ACGTAAC/db/db1  | db/db | 689  | 0.075259 | FALSE | 0.901532 | FALSE | Photoreceptor          |
| ACGTAAC/db/db1  | db/db | 2532 | 0.029266 | FALSE | 0.545198 | FALSE | Photoreceptor          |
| ACGTAAC/db/db1  | db/db | 1733 | 0.073582 | FALSE | 0.968121 | FALSE | Endothelia Capillary E |
| ACGTAAC/db/db1  | db/db | 780  | 0.058205 | FALSE | 7.302905 | TRUE  |                        |
| ACGTACA/db/db1  | db/db | 630  | 0.044326 | FALSE | 0.783489 | FALSE | Photoreceptor          |
| ACGTACA/db/db1  | db/db | 1635 | 0.021669 | FALSE | 1.335415 | FALSE | Endothelia Capillary E |
| ACGTACA/db/db1  | db/db | 355  | 0.143501 | TRUE  | 18.42105 | TRUE  |                        |
| ACGTACA/db/db1  | db/db | 1493 | 0.023682 | FALSE | 0.857469 | FALSE | Endothelia Capillary E |
| ACGTACA/db/db1  | db/db | 7638 | 0.016799 | FALSE | 0.62256  | FALSE | Photoreceptor          |
| ACGTACA/db/db1  | db/db | 893  | 0.013876 | FALSE | 1.180136 | FALSE | Endothelia Capillary E |
| ACGTACA/db/db1  | db/db | 3127 | 0.027758 | FALSE | 0.947322 | FALSE | Endothelia EC-C4       |
| ACGTACA/db/db1  | db/db | 8559 | 0.013338 | FALSE | 0.58324  | FALSE | Photoreceptor          |
| ACGTACA/db/db1  | db/db | 3153 | 0.020171 | FALSE | 0.899935 | FALSE | Endothelia Venous EC   |
| ACGTAGT/db/db1  | db/db | 673  | 0.029787 | FALSE | 2.844004 | FALSE | Photoreceptor          |
| ACGTAGT/db/db1  | db/db | 3348 | 0.022059 | FALSE | 0.844379 | FALSE | Endothelia Venous EC   |
| ACGTAGT/db/db1  | db/db | 821  | 0.078788 | FALSE | 1.9051   | FALSE | Photoreceptor          |
| ACGTAGT/db/db1  | db/db | 3208 | 0.013876 | FALSE | 0.799306 | FALSE | Neuron                 |
| ACGTAGT/db/db1  | db/db | 3219 | 0.038251 | FALSE | 0.85438  | FALSE | Photoreceptor          |
| ACGTAGT/db/db1  | db/db | 612  | 0.042704 | FALSE | 1.900436 | FALSE | Muller cell            |
| ACGTAGT/db/db1  | db/db | 421  | 0.076994 | FALSE | 5.427632 | TRUE  |                        |
| ACGTAGT/db/db1  | db/db | 1752 | 0.008644 | FALSE | 1.21792  | FALSE | Endothelia Capillary E |
| ACGTAGT/db/db1  | db/db | 5105 | 0.045165 | FALSE | 0.786649 | FALSE | Endothelia Venous EC   |
| ACGTCCTA/db/db1 | db/db | 2386 | 0.024534 | FALSE | 0.765005 | FALSE | Endothelia EC-C4       |
| ACGTCCTA/db/db1 | db/db | 841  | 0.051646 | FALSE | 1.034256 | FALSE | Photoreceptor          |
| ACGTCCTA/db/db1 | db/db | 2626 | 0.053718 | FALSE | 10.416   | TRUE  |                        |

|                  |       |      |          |       |          |       |                        |
|------------------|-------|------|----------|-------|----------|-------|------------------------|
| ACGTCCTC db/db1  | db/db | 749  | 0.119124 | TRUE  | 8.01364  | TRUE  |                        |
| ACGTCCTC db/db1  | db/db | 1865 | 0.042704 | FALSE | 0.675458 | FALSE | Photoreceptor          |
| ACGTCCTC db/db1  | db/db | 2577 | 0.004762 | FALSE | 1.15776  | FALSE | Neuron                 |
| ACGTCCTT db/db1  | db/db | 809  | 0.043505 | FALSE | 0.806836 | FALSE | Photoreceptor          |
| ACGTCCTT db/db1  | db/db | 2065 | 0.043505 | FALSE | 1.060321 | FALSE | Neuron                 |
| ACGTCCTT db/db1  | db/db | 4769 | 0.115723 | TRUE  | 1.143131 | FALSE |                        |
| ACGTTCCA db/db1  | db/db | 4486 | 0.035586 | FALSE | 0.833979 | FALSE | Endothelia Venous EC   |
| ACGTTCCA db/db1  | db/db | 952  | 0.067388 | FALSE | 0.431703 | FALSE | Photoreceptor          |
| ACGTTCCA db/db1  | db/db | 1799 | 0.016181 | FALSE | 0.763968 | FALSE | Photoreceptor          |
| ACGTTCCG db/db1  | db/db | 421  | 0.082569 | FALSE | 2.000911 | FALSE | Photoreceptor          |
| ACGTTCCG db/db1  | db/db | 4134 | 0.023682 | FALSE | 0.918558 | FALSE | Endothelia Venous EC   |
| ACGTTCCCT db/db1 | db/db | 1238 | 0.059406 | FALSE | 1.364316 | FALSE | Photoreceptor          |
| ACGTTCCCT db/db1 | db/db | 752  | 0.038251 | FALSE | 0.414082 | FALSE | Photoreceptor          |
| ACGTTCCCT db/db1 | db/db | 3494 | 0.034954 | FALSE | 0.591378 | FALSE | Photoreceptor          |
| ACGTTCCCT db/db1 | db/db | 1304 | 0.082569 | FALSE | 1.343442 | FALSE | Photoreceptor          |
| ACTACGA db/db1   | db/db | 1506 | 0.046906 | FALSE | 0.629286 | FALSE | Photoreceptor          |
| ACTACGA db/db1   | db/db | 382  | 0.029266 | FALSE | 0.937731 | FALSE | Photoreceptor          |
| ACTACGA db/db1   | db/db | 1036 | 0.039671 | FALSE | 2.395499 | FALSE | Endothelia Capillary E |
| ACTATCTA db/db1  | db/db | 1859 | 0.103567 | TRUE  | 1.397452 | FALSE |                        |
| ACTATCTA db/db1  | db/db | 3743 | 0.055901 | FALSE | 1.062376 | FALSE | Photoreceptor          |
| ACTATCTC db/db1  | db/db | 528  | 0.098234 | FALSE | 3.228756 | FALSE | Endothelia Capillary E |
| ACTATCTC db/db1  | db/db | 3442 | 0.017114 | FALSE | 1.066746 | FALSE | Endothelia Venous EC   |
| ACTATCTC db/db1  | db/db | 3575 | 0.048732 | FALSE | 1.216891 | FALSE | Photoreceptor          |
| ACTATCTG db/db1  | db/db | 863  | 0.026796 | FALSE | 0.81958  | FALSE | Photoreceptor          |
| ACTATCTG db/db1  | db/db | 5780 | 0.053718 | FALSE | 0.778963 | FALSE | Endothelia Venous EC   |
| ACTATCTG db/db1  | db/db | 572  | 0.038251 | FALSE | 0.221305 | FALSE | Photoreceptor          |
| ACTATCTG db/db1  | db/db | 2264 | 0.029266 | FALSE | 0.96919  | FALSE | Photoreceptor          |
| ACTATCTG db/db1  | db/db | 1898 | 0.030859 | FALSE | 0.920576 | FALSE | Endothelia EC-C4       |
| ACTATCTT db/db1  | db/db | 4065 | 0.022857 | FALSE | 0.881252 | FALSE | Endothelia Capillary E |
| ACTATCTT db/db1  | db/db | 2568 | 0.030859 | FALSE | 0.64704  | FALSE | Photoreceptor          |
| ACTATCTT db/db1  | db/db | 3781 | 0.024534 | FALSE | 1.195034 | FALSE | Photoreceptor          |
| ACTATGG db/db1   | db/db | 648  | 0.059406 | FALSE | 1.229736 | FALSE | Endothelia EC-C4       |
| ACTATGG db/db1   | db/db | 2425 | 0.024534 | FALSE | 0.829453 | FALSE | Endothelia Venous EC   |
| ACTATGG db/db1   | db/db | 2854 | 0.042704 | FALSE | 1.012141 | FALSE | Neuron                 |
| ACTATGG db/db1   | db/db | 1990 | 0.130259 | TRUE  | 4.223969 | FALSE |                        |
| ACTATGG db/db1   | db/db | 741  | 0.034954 | FALSE | 2.715512 | FALSE | Muller cell            |
| ACTATGG db/db1   | db/db | 381  | 0.021286 | FALSE | 0.990165 | FALSE | Photoreceptor          |
| ACTATGG db/db1   | db/db | 668  | 0.08663  | FALSE | 7.234043 | TRUE  |                        |
| ACTATGG db/db1   | db/db | 1270 | 0.038251 | FALSE | 1.158304 | FALSE | Photoreceptor          |
| ACTATGG db/db1   | db/db | 1229 | 0.08663  | FALSE | 1.33461  | FALSE | Photoreceptor          |
| ACTATGG db/db1   | db/db | 6126 | 0.037564 | FALSE | 0.750967 | FALSE | Photoreceptor          |
| ACTATTCA db/db1  | db/db | 1312 | 0.015581 | FALSE | 1.166219 | FALSE | Endothelia Capillary E |
| ACTATTCC db/db1  | db/db | 1837 | 0.057037 | FALSE | 0.941372 | FALSE | Photoreceptor          |
| ACTATTCC db/db1  | db/db | 6994 | 0.014997 | FALSE | 0.216563 | FALSE | Photoreceptor          |
| ACTATTCCG db/db1 | db/db | 2168 | 0.019106 | FALSE | 0.73982  | FALSE | Endothelia EC-C4       |
| ACTATTCT db/db1  | db/db | 729  | 0.013876 | FALSE | 1.597473 | FALSE | Pericyte               |
| ACTATTCT db/db1  | db/db | 931  | 0.133788 | TRUE  | 4.148472 | FALSE |                        |

|          |        |       |      |          |       |          |       |                        |
|----------|--------|-------|------|----------|-------|----------|-------|------------------------|
| ACTATTCT | db/db1 | db/db | 925  | 0.007441 | FALSE | 1.802773 | FALSE | Endothelia Capillary E |
| ACTCCCAC | db/db1 | db/db | 7404 | 0.034954 | FALSE | 0.777887 | FALSE | Photoreceptor          |
| ACTCCCAG | db/db1 | db/db | 1339 | 0.065957 | FALSE | 1.449823 | FALSE | Photoreceptor          |
| ACTCCCAG | db/db1 | db/db | 939  | 0.013074 | FALSE | 1.556574 | FALSE | Endothelia EC-C4       |
| ACTCCCAG | db/db1 | db/db | 690  | 0.115723 | TRUE  | 3.4375   | FALSE |                        |
| ACTCCCAT | db/db1 | db/db | 575  | 0.013876 | FALSE | 0.161872 | FALSE | Photoreceptor          |
| ACTCCCAT | db/db1 | db/db | 6595 | 0.022857 | FALSE | 0.532473 | FALSE | Photoreceptor          |
| ACTCCCAT | db/db1 | db/db | 630  | 0.046025 | FALSE | 0.646973 | FALSE | Photoreceptor          |
| ACTCCCAT | db/db1 | db/db | 1403 | 0.060641 | FALSE | 1.170717 | FALSE | Photoreceptor          |
| ACTCCCAT | db/db1 | db/db | 3377 | 0.218615 | TRUE  | 2.773156 | FALSE |                        |
| ACTCTCGA | db/db1 | db/db | 687  | 0.036232 | FALSE | 1.633794 | FALSE | Photoreceptor          |
| ACTCTCGA | db/db1 | db/db | 2277 | 0.05065  | FALSE | 0.902188 | FALSE | Photoreceptor          |
| ACTCTCGA | db/db1 | db/db | 1853 | 0.088776 | FALSE | 1.298761 | FALSE | Endothelia EC-C4       |
| ACTCTCGC | db/db1 | db/db | 828  | 0.065957 | FALSE | 1.287313 | FALSE | Photoreceptor          |
| ACTCTCGC | db/db1 | db/db | 1806 | 0.012052 | FALSE | 1.911883 | FALSE | Endothelia EC-C4       |
| ACTCTCGC | db/db1 | db/db | 1431 | 0.015581 | FALSE | 1.479971 | FALSE | Endothelia Capillary E |
| ACTCTCGT | db/db1 | db/db | 364  | 0.088776 | FALSE | 26.39594 | TRUE  |                        |
| ACTCTCGT | db/db1 | db/db | 2025 | 0.027273 | FALSE | 1.207141 | FALSE | Microglia              |
| ACTGATG  | db/db1 | db/db | 435  | 0.143501 | TRUE  | 1.663586 | FALSE |                        |
| ACTGATG  | db/db1 | db/db | 1369 | 0.005958 | FALSE | 1.450006 | FALSE | Endothelia EC-C4       |
| ACTGATG  | db/db1 | db/db | 4093 | 0.021669 | FALSE | 1.022096 | FALSE | Endothelia Venous EC   |
| ACTGATG  | db/db1 | db/db | 4043 | 0.023682 | FALSE | 1.136399 | FALSE | Endothelia Capillary E |
| ACTGATG  | db/db1 | db/db | 839  | 0.071958 | FALSE | 0.815952 | FALSE | Photoreceptor          |
| ACTGATG  | db/db1 | db/db | 4608 | 0.049679 | FALSE | 0.828976 | FALSE | Photoreceptor          |
| ACTGATG  | db/db1 | db/db | 1779 | 0.133788 | TRUE  | 2.564103 | FALSE |                        |
| ACTGATG  | db/db1 | db/db | 737  | 0.014151 | FALSE | 0.446603 | FALSE | Photoreceptor          |
| ACTGATG  | db/db1 | db/db | 3983 | 0.023266 | FALSE | 0.897661 | FALSE | Photoreceptor          |
| ACTGATG  | db/db1 | db/db | 1400 | 0.021669 | FALSE | 1.15831  | FALSE | Endothelia Capillary E |
| ACTGATG  | db/db1 | db/db | 704  | 0.048732 | FALSE | 0.703076 | FALSE | Photoreceptor          |
| ACTGCAA  | db/db1 | db/db | 6217 | 0.020171 | FALSE | 0.781298 | FALSE | Photoreceptor          |
| ACTGCAA  | db/db1 | db/db | 455  | 0.034334 | FALSE | 1.244319 | FALSE | Photoreceptor          |
| ACTGCAAC | db/db1 | db/db | 771  | 0.070386 | FALSE | 6.857639 | TRUE  |                        |
| ACTGCAAC | db/db1 | db/db | 3012 | 0.027273 | FALSE | 0.720606 | FALSE | Endothelia Venous EC   |
| ACTGCAAC | db/db1 | db/db | 1427 | 0.017758 | FALSE | 1.637875 | FALSE | Endothelia Capillary E |
| ACTGCAAC | db/db1 | db/db | 696  | 0.078788 | FALSE | 1.734552 | FALSE | Endothelia Capillary E |
| ACTGCAAC | db/db1 | db/db | 838  | 0.046025 | FALSE | 0.970755 | FALSE | Photoreceptor          |
| ACTGCAAC | db/db1 | db/db | 618  | 0.022857 | FALSE | 1.070047 | FALSE | Muller cell            |
| ACTGCAAC | db/db1 | db/db | 2682 | 0.012303 | FALSE | 1.091208 | FALSE | Endothelia Venous EC   |
| ACTGCAAC | db/db1 | db/db | 1218 | 0.082569 | FALSE | 6.595092 | TRUE  |                        |
| ACTGCAAT | db/db1 | db/db | 2748 | 0.013605 | FALSE | 0.929702 | FALSE | Endothelia Capillary E |
| ACTGTCCA | db/db1 | db/db | 1858 | 0.019106 | FALSE | 1.29746  | FALSE | Endothelia Capillary E |
| ACTGTCCA | db/db1 | db/db | 7301 | 0.014429 | FALSE | 0.320716 | FALSE | Photoreceptor          |
| ACTGTCCA | db/db1 | db/db | 582  | 0.485327 | TRUE  | 5.67201  | TRUE  |                        |
| ACTGTCCC | db/db1 | db/db | 2584 | 0.023266 | FALSE | 0.705763 | FALSE | Photoreceptor          |
| ACTGTCCC | db/db1 | db/db | 810  | 0.093319 | FALSE | 2.086259 | FALSE | Photoreceptor          |
| ACTGTCCC | db/db1 | db/db | 5325 | 0.020536 | FALSE | 0.667976 | FALSE | Photoreceptor          |
| ACTGTCCC | db/db1 | db/db | 1533 | 0.116912 | TRUE  | 4.069768 | FALSE |                        |

|                 |       |      |          |       |          |       |                        |
|-----------------|-------|------|----------|-------|----------|-------|------------------------|
| ACTGTCCT db/db1 | db/db | 6421 | 0.200401 | TRUE  | 1.440725 | FALSE |                        |
| ACTGTCCT db/db1 | db/db | 1881 | 0.014429 | FALSE | 0.983676 | FALSE | Endothelia EC-C4       |
| ACTGTCCT db/db1 | db/db | 2404 | 0.030318 | FALSE | 1.243525 | FALSE | Endothelia Venous EC   |
| ACTGTCCT db/db1 | db/db | 6444 | 0.126437 | TRUE  | 1.104898 | FALSE |                        |
| ACTGTGA db/db1  | db/db | 1924 | 0.055901 | FALSE | 1.057517 | FALSE | Photoreceptor          |
| ACTGTGA db/db1  | db/db | 1137 | 0.048732 | FALSE | 0.873268 | FALSE | Photoreceptor          |
| ACTGTGA db/db1  | db/db | 600  | 0.024105 | FALSE | 3.339141 | FALSE | Photoreceptor          |
| ACTGTGA db/db1  | db/db | 2742 | 0.023266 | FALSE | 1.005823 | FALSE | Endothelia EC-C4       |
| ACTGTGA db/db1  | db/db | 2011 | 0.041154 | FALSE | 0.879224 | FALSE | Photoreceptor          |
| ACTGTGA db/db1  | db/db | 3495 | 0.019106 | FALSE | 0.866695 | FALSE | Endothelia EC-C4       |
| ACTGTGA db/db1  | db/db | 3063 | 0.020536 | FALSE | 0.70098  | FALSE | Photoreceptor          |
| ACTGTGA db/db1  | db/db | 1112 | 0.067388 | FALSE | 1.42933  | FALSE | Photoreceptor          |
| ACTGTGA db/db1  | db/db | 6984 | 0.024105 | FALSE | 0.587847 | FALSE | Photoreceptor          |
| ACTGTGA db/db1  | db/db | 760  | 0.023266 | FALSE | 1.565614 | FALSE | Photoreceptor          |
| ACTGTGA db/db1  | db/db | 735  | 0.04192  | FALSE | 1.069097 | FALSE | Photoreceptor          |
| ACTGTGA db/db1  | db/db | 2619 | 0.024971 | FALSE | 1.00151  | FALSE | Endothelia EC-C4       |
| ACTGTGA db/db1  | db/db | 2487 | 0.051646 | FALSE | 0.888567 | FALSE | Endothelia Capillary E |
| ACTTAGG db/db1  | db/db | 5013 | 0.177638 | TRUE  | 1.965924 | FALSE |                        |
| ACTTAGG db/db1  | db/db | 1133 | 0.022059 | FALSE | 0.503217 | FALSE | Photoreceptor          |
| ACTTAGG db/db1  | db/db | 1075 | 0.031973 | FALSE | 0.365436 | FALSE | Photoreceptor          |
| ACTTAGG db/db1  | db/db | 1362 | 0.016181 | FALSE | 1.105081 | FALSE | Endothelia Capillary E |
| ACTTAGG db/db1  | db/db | 2832 | 0.023682 | FALSE | 0.837203 | FALSE | Endothelia EC-C4       |
| ACTTAGG db/db1  | db/db | 2503 | 0.043505 | FALSE | 0.922063 | FALSE | Photoreceptor          |
| ACTTAGG db/db1  | db/db | 4514 | 0.040404 | FALSE | 0.929471 | FALSE | Endothelia Venous EC   |
| ACTTAGG db/db1  | db/db | 1389 | 0.031411 | FALSE | 0.715721 | FALSE | Photoreceptor          |
| ACTTAGG db/db1  | db/db | 597  | 0.030318 | FALSE | 4.388669 | FALSE | Muller cell            |
| ACTTAGG db/db1  | db/db | 1078 | 0.028754 | FALSE | 1.036487 | FALSE | Photoreceptor          |
| ACTTAGG db/db1  | db/db | 3033 | 0.015581 | FALSE | 1.020502 | FALSE | Endothelia Venous EC   |
| ACTTATCA db/db1 | db/db | 2241 | 0.106408 | TRUE  | 4.373384 | FALSE |                        |
| ACTTATCC db/db1 | db/db | 6711 | 0.200401 | TRUE  | 1.520945 | FALSE |                        |
| ACTTATCC db/db1 | db/db | 3425 | 0.138889 | TRUE  | 3.574088 | FALSE |                        |
| ACTTATCG db/db1 | db/db | 2079 | 0.055901 | FALSE | 0.992869 | FALSE | Photoreceptor          |
| ACTTCCGC db/db1 | db/db | 478  | 0.013074 | FALSE | 3.030827 | FALSE | Endothelia Capillary E |
| ACTTCCGC db/db1 | db/db | 1622 | 0.070386 | FALSE | 1.420828 | FALSE | Photoreceptor          |
| ACTTCCGC db/db1 | db/db | 1178 | 0.063221 | FALSE | 1.744873 | FALSE | Photoreceptor          |
| ACTTCCGT db/db1 | db/db | 4338 | 0.046906 | FALSE | 0.961939 | FALSE | Endothelia Venous EC   |
| ACTTCCGT db/db1 | db/db | 622  | 0.012814 | FALSE | 2.980122 | FALSE | Photoreceptor          |
| ACTTCCGT db/db1 | db/db | 852  | 0.045165 | FALSE | 1.895323 | FALSE | Photoreceptor          |
| ACTTCGCA db/db1 | db/db | 2096 | 0.043505 | FALSE | 1.258425 | FALSE | Neuron                 |
| ACTTCGCC db/db1 | db/db | 4713 | 0.034334 | FALSE | 0.921587 | FALSE | Endothelia EC-C4       |
| ACTTCGCC db/db1 | db/db | 2985 | 0.445833 | TRUE  | 3.649635 | FALSE |                        |
| ACTTCGCC db/db1 | db/db | 2532 | 0.075259 | FALSE | 1.275636 | FALSE | Neuron                 |
| ACTTCGCC db/db1 | db/db | 434  | 0.122388 | TRUE  | 2.3766   | FALSE |                        |
| ACTTCGCT db/db1 | db/db | 949  | 0.08663  | FALSE | 15.20913 | TRUE  |                        |
| ACTTTCAA db/db1 | db/db | 6746 | 0.049679 | FALSE | 0.830004 | FALSE | Photoreceptor          |
| ACTTTCAA db/db1 | db/db | 4493 | 0.022059 | FALSE | 0.618508 | FALSE | Photoreceptor          |
| ACTTTCAC db/db1 | db/db | 1462 | 0.008438 | FALSE | 1.150505 | FALSE | Endothelia EC-C4       |

|                 |       |      |          |       |          |       |                        |
|-----------------|-------|------|----------|-------|----------|-------|------------------------|
| ACTTTCAC db/db1 | db/db | 398  | 0.177638 | TRUE  | 9.960938 | TRUE  |                        |
| ACTTTCAC db/db1 | db/db | 1452 | 0.04192  | FALSE | 1.654597 | FALSE | Pericyte               |
| ACTTTCAT db/db1 | db/db | 800  | 0.010614 | FALSE | 1.335571 | FALSE | Endothelia EC-C4       |
| ACTTTGTA db/db1 | db/db | 5784 | 0.033726 | FALSE | 0.907613 | FALSE | Photoreceptor          |
| ACTTTGTA db/db1 | db/db | 1661 | 0.027273 | FALSE | 0.802925 | FALSE | Endothelia Capillary E |
| ACTTTGTA db/db1 | db/db | 1402 | 0.028754 | FALSE | 1.004916 | FALSE | Endothelia Capillary E |
| ACTTTGTA db/db1 | db/db | 483  | 0.030318 | FALSE | 2.763578 | FALSE | Photoreceptor          |
| ACTTTGTA db/db1 | db/db | 671  | 0.109375 | TRUE  | 4.48718  | FALSE |                        |
| ACTTTGTC db/db1 | db/db | 1490 | 0.14163  | TRUE  | 2.531102 | FALSE |                        |
| ACTTTGTC db/db1 | db/db | 4700 | 0.024105 | FALSE | 0.797634 | FALSE | Photoreceptor          |
| ACTTTGTC db/db1 | db/db | 1881 | 0.024971 | FALSE | 1.348155 | FALSE | Neuron                 |
| ACTTTGTC db/db1 | db/db | 5035 | 0.013338 | FALSE | 0.445263 | FALSE | Photoreceptor          |
| ACTTTGTG db/db1 | db/db | 3456 | 0.032546 | FALSE | 1.175789 | FALSE | Photoreceptor          |
| ACTTTGTG db/db1 | db/db | 6435 | 0.122691 | TRUE  | 1.600241 | FALSE |                        |
| ACTTTGTG db/db1 | db/db | 491  | 0.068864 | FALSE | 5.948553 | TRUE  |                        |
| AGAAATG db/db1  | db/db | 1226 | 0.014151 | FALSE | 0.487556 | FALSE | Photoreceptor          |
| AGAAATG db/db1  | db/db | 953  | 0.029266 | FALSE | 1.932825 | FALSE | Photoreceptor          |
| AGAAATG db/db1  | db/db | 521  | 0.037564 | FALSE | 4.530859 | FALSE | Photoreceptor          |
| AGAAATG db/db1  | db/db | 3037 | 0.041154 | FALSE | 0.848718 | FALSE | Microglia              |
| AGAAATG db/db1  | db/db | 3404 | 0.015287 | FALSE | 0.729513 | FALSE | Endothelia Venous EC   |
| AGAACAA db/db1  | db/db | 1958 | 0.017114 | FALSE | 0.99601  | FALSE | Endothelia Capillary E |
| AGAACAA db/db1  | db/db | 5045 | 0.028754 | FALSE | 0.647802 | FALSE | Photoreceptor          |
| AGAACAA db/db1  | db/db | 1574 | 0.019106 | FALSE | 1.544588 | FALSE | Endothelia Venous EC   |
| AGAACAA db/db1  | db/db | 1656 | 0.055901 | FALSE | 0.248141 | FALSE | Photoreceptor          |
| AGAACAA db/db1  | db/db | 5111 | 0.024105 | FALSE | 0.576592 | FALSE | Photoreceptor          |
| AGAACAA db/db1  | db/db | 3876 | 0.053718 | FALSE | 0.755858 | FALSE | Endothelia Venous EC   |
| AGAACAA db/db1  | db/db | 3804 | 0.03313  | FALSE | 0.863082 | FALSE | Endothelia Capillary E |
| AGAACAA db/db1  | db/db | 2112 | 0.019455 | FALSE | 0.842928 | FALSE | Endothelia Venous EC   |
| AGAACAA db/db1  | db/db | 620  | 0.026796 | FALSE | 2.015728 | FALSE | Endothelia Capillary E |
| AGAACCT db/db1  | db/db | 2314 | 0.115723 | TRUE  | 1.824158 | FALSE |                        |
| AGAACCT db/db1  | db/db | 1496 | 0.061912 | FALSE | 1.821879 | FALSE | Endothelia Capillary E |
| AGAACCT db/db1  | db/db | 3010 | 0.115723 | TRUE  | 1.671523 | FALSE |                        |
| AGAACCT db/db1  | db/db | 3080 | 0.031973 | FALSE | 1.02032  | FALSE | Photoreceptor          |
| AGAAGCG db/db1  | db/db | 2725 | 0.010157 | FALSE | 0.998221 | FALSE | Endothelia Venous EC   |
| AGAAGCG db/db1  | db/db | 809  | 0.036232 | FALSE | 2.01312  | FALSE | Endothelia Capillary E |
| AGAAGCG db/db1  | db/db | 8416 | 0.016181 | FALSE | 0.463207 | FALSE | Photoreceptor          |
| AGAAGCG db/db1  | db/db | 487  | 0.061912 | FALSE | 3.007374 | FALSE | Muller cell            |
| AGAAGCG db/db1  | db/db | 442  | 0.252153 | TRUE  | 13.49206 | TRUE  |                        |
| AGAAGCG db/db1  | db/db | 380  | 0.15354  | TRUE  | 10.78431 | TRUE  |                        |
| AGAAGTA db/db1  | db/db | 2549 | 0.070386 | FALSE | 1.473757 | FALSE | Photoreceptor          |
| AGAAGTA db/db1  | db/db | 3691 | 0.020908 | FALSE | 1.017245 | FALSE | Endothelia Venous EC   |
| AGAAGTA db/db1  | db/db | 742  | 0.080645 | FALSE | 2.392032 | FALSE | Endothelia Capillary E |
| AGAAGTA db/db1  | db/db | 8367 | 0.314286 | TRUE  | 0.699189 | FALSE |                        |
| AGAAGTA db/db1  | db/db | 596  | 0.013876 | FALSE | 1.770601 | FALSE | Pericyte               |
| AGACAAA db/db1  | db/db | 757  | 0.037564 | FALSE | 2.290695 | FALSE | Muller cell            |
| AGACAAA db/db1  | db/db | 2946 | 0.022455 | FALSE | 0.76448  | FALSE | Photoreceptor          |
| AGACAAA db/db1  | db/db | 1010 | 0.025868 | FALSE | 0.946203 | FALSE | Endothelia Capillary E |

|          |        |       |      |          |       |          |       |                        |
|----------|--------|-------|------|----------|-------|----------|-------|------------------------|
| AGACAAA  | db/db1 | db/db | 5716 | 0.038953 | FALSE | 0.788759 | FALSE | Endothelia EC-C4       |
| AGACAAA  | db/db1 | db/db | 1580 | 0.010157 | FALSE | 1.224265 | FALSE | Endothelia EC-C4       |
| AGACAAA  | db/db1 | db/db | 7568 | 0.014151 | FALSE | 0.491241 | FALSE | Photoreceptor          |
| AGACAAA  | db/db1 | db/db | 1016 | 0.109375 | TRUE  | 2.537723 | FALSE |                        |
| AGACAAA  | db/db1 | db/db | 427  | 0.031411 | FALSE | 0.964994 | FALSE | Photoreceptor          |
| AGACACT  | db/db1 | db/db | 6636 | 0.019106 | FALSE | 0.66304  | FALSE | Photoreceptor          |
| AGACACT  | db/db1 | db/db | 2395 | 0.05065  | FALSE | 1.431142 | FALSE | Photoreceptor          |
| AGACACT  | db/db1 | db/db | 663  | 0.030318 | FALSE | 1.763652 | FALSE | Photoreceptor          |
| AGACACT  | db/db1 | db/db | 373  | 0.047807 | FALSE | 3.223467 | FALSE | Neuron                 |
| AGACACT  | db/db1 | db/db | 604  | 0.037564 | FALSE | 2.587669 | FALSE | Muller cell            |
| AGACACT  | db/db1 | db/db | 2134 | 0.028251 | FALSE | 0.934992 | FALSE | Endothelia Venous EC   |
| AGACACTT | db/db1 | db/db | 4122 | 0.24     | TRUE  | 2.702973 | FALSE |                        |
| AGACAGG  | db/db1 | db/db | 782  | 0.53202  | TRUE  | 5.057675 | TRUE  |                        |
| AGACAGG  | db/db1 | db/db | 2325 | 0.018088 | FALSE | 0.989243 | FALSE | Endothelia Venous EC   |
| AGACAGG  | db/db1 | db/db | 1237 | 0.061912 | FALSE | 0.658854 | FALSE | Photoreceptor          |
| AGACAGG  | db/db1 | db/db | 4994 | 0.138889 | TRUE  | 5.009892 | TRUE  |                        |
| AGACAGG  | db/db1 | db/db | 2258 | 0.023682 | FALSE | 1.075834 | FALSE | Endothelia Capillary E |
| AGACAGG  | db/db1 | db/db | 2604 | 0.015287 | FALSE | 1.180785 | FALSE | Endothelia Capillary E |
| AGACAGG  | db/db1 | db/db | 8347 | 0.024534 | FALSE | 0.451706 | FALSE | Photoreceptor          |
| AGACAGG  | db/db1 | db/db | 6001 | 0.029787 | FALSE | 0.660198 | FALSE | Photoreceptor          |
| AGACAGG  | db/db1 | db/db | 772  | 0.015287 | FALSE | 1.911022 | FALSE | Photoreceptor          |
| AGACCAT  | db/db1 | db/db | 2305 | 0.022857 | FALSE | 1.194936 | FALSE | Endothelia Capillary E |
| AGACCAT  | db/db1 | db/db | 1479 | 0.037564 | FALSE | 1.51409  | FALSE | Endothelia Capillary E |
| AGACCAT  | db/db1 | db/db | 1368 | 0.03313  | FALSE | 1.277295 | FALSE | Endothelia Venous EC   |
| AGACCAT  | db/db1 | db/db | 886  | 0.010614 | FALSE | 0.89416  | FALSE | Photoreceptor          |
| AGACCAT  | db/db1 | db/db | 2467 | 0.018761 | FALSE | 1.06073  | FALSE | Endothelia Capillary E |
| AGACCAT  | db/db1 | db/db | 7117 | 0.018761 | FALSE | 0.520583 | FALSE | Photoreceptor          |
| AGACCAT  | db/db1 | db/db | 2862 | 0.040404 | FALSE | 1.065663 | FALSE | Photoreceptor          |
| AGACCATT | db/db1 | db/db | 1547 | 0.009933 | FALSE | 1.23222  | FALSE | Endothelia Capillary E |
| AGACCATT | db/db1 | db/db | 1668 | 0.075259 | FALSE | 0.483097 | FALSE | Photoreceptor          |
| AGACCATT | db/db1 | db/db | 3873 | 0.019106 | FALSE | 0.802554 | FALSE | Endothelia Venous EC   |
| AGACCATT | db/db1 | db/db | 1391 | 0.011805 | FALSE | 1.668487 | FALSE | Endothelia Capillary E |
| AGACCCG  | db/db1 | db/db | 2292 | 0.084562 | FALSE | 0.901633 | FALSE | Photoreceptor          |
| AGACCCG  | db/db1 | db/db | 430  | 0.048732 | FALSE | 1.500108 | FALSE | Photoreceptor          |
| AGACCCG  | db/db1 | db/db | 3273 | 0.021669 | FALSE | 1.060007 | FALSE | Endothelia Capillary E |
| AGACCCG  | db/db1 | db/db | 6772 | 0.031973 | FALSE | 0.592829 | FALSE | Photoreceptor          |
| AGACCCG  | db/db1 | db/db | 873  | 0.005782 | FALSE | 1.035946 | FALSE | Endothelia Capillary E |
| AGACCCG  | db/db1 | db/db | 2117 | 0.103567 | TRUE  | 1.612903 | FALSE |                        |
| AGACCCG  | db/db1 | db/db | 2051 | 0.070386 | FALSE | 0.855111 | FALSE | Photoreceptor          |
| AGACCCG  | db/db1 | db/db | 4010 | 0.024105 | FALSE | 0.78341  | FALSE | Photoreceptor          |
| AGACTCA  | db/db1 | db/db | 3598 | 0.013605 | FALSE | 0.796045 | FALSE | Photoreceptor          |
| AGACTCA  | db/db1 | db/db | 694  | 0.013074 | FALSE | 0.984512 | FALSE | Endothelia Capillary E |
| AGACTCA  | db/db1 | db/db | 5040 | 0.034334 | FALSE | 0.855287 | FALSE | Endothelia Venous EC   |
| AGACTCA  | db/db1 | db/db | 2149 | 0.071958 | FALSE | 5.658973 | TRUE  |                        |
| AGACTCA  | db/db1 | db/db | 2231 | 0.015879 | FALSE | 0.884482 | FALSE | Endothelia EC-C4       |
| AGACTCA  | db/db1 | db/db | 3597 | 0.014151 | FALSE | 0.921282 | FALSE | Endothelia Capillary E |
| AGACTCA  | db/db1 | db/db | 2442 | 0.045165 | FALSE | 0.90883  | FALSE | Photoreceptor          |

|                 |       |      |          |       |          |       |                        |
|-----------------|-------|------|----------|-------|----------|-------|------------------------|
| AGACTCAT db/db1 | db/db | 8039 | 0.013876 | FALSE | 0.558283 | FALSE | Photoreceptor          |
| AGACTCAT db/db1 | db/db | 5681 | 0.148377 | TRUE  | 2.253882 | FALSE |                        |
| AGAGAAT db/db1  | db/db | 2105 | 0.093319 | FALSE | 5.284664 | TRUE  |                        |
| AGAGAAT db/db1  | db/db | 6899 | 0.063221 | FALSE | 0.754506 | FALSE | Photoreceptor          |
| AGAGAAT db/db1  | db/db | 2449 | 0.034954 | FALSE | 1.155145 | FALSE | Endothelia EC-C4       |
| AGAGAAT db/db1  | db/db | 526  | 0.047807 | FALSE | 1.79651  | FALSE | Photoreceptor          |
| AGAGAAT db/db1  | db/db | 3805 | 0.112477 | TRUE  | 1.145883 | FALSE |                        |
| AGAGAAT db/db1  | db/db | 623  | 0.025868 | FALSE | 0.881156 | FALSE | Photoreceptor          |
| AGAGAAT db/db1  | db/db | 696  | 0.082569 | FALSE | 2.758772 | FALSE | Muller cell            |
| AGAGAAT db/db1  | db/db | 723  | 0.024971 | FALSE | 1.092613 | FALSE | Photoreceptor          |
| AGAGAAT db/db1  | db/db | 7504 | 0.026328 | FALSE | 0.59215  | FALSE | Photoreceptor          |
| AGAGAAT db/db1  | db/db | 3351 | 0.04192  | FALSE | 0.896558 | FALSE | Photoreceptor          |
| AGAGAAT db/db1  | db/db | 2437 | 0.029787 | FALSE | 0.838117 | FALSE | Photoreceptor          |
| AGAGAGC db/db1  | db/db | 705  | 0.010846 | FALSE | 1.588489 | FALSE | Endothelia Capillary E |
| AGAGAGC db/db1  | db/db | 1779 | 0.028754 | FALSE | 0.704017 | FALSE | Photoreceptor          |
| AGAGAGC db/db1  | db/db | 6081 | 0.034954 | FALSE | 0.826437 | FALSE | Photoreceptor          |
| AGAGAGC db/db1  | db/db | 760  | 0.068864 | FALSE | 1.381924 | FALSE | Photoreceptor          |
| AGAGAGC db/db1  | db/db | 4700 | 0.059406 | FALSE | 0.856735 | FALSE | Endothelia Venous EC   |
| AGAGAGC db/db1  | db/db | 1340 | 0.028754 | FALSE | 1.563    | FALSE | Endothelia Capillary E |
| AGAGAGC db/db1  | db/db | 2015 | 0.018088 | FALSE | 0.926327 | FALSE | Endothelia EC-C4       |
| AGAGAGC db/db1  | db/db | 919  | 0.252153 | TRUE  | 1.651528 | FALSE |                        |
| AGAGAGC db/db1  | db/db | 6722 | 0.026796 | FALSE | 0.731307 | FALSE | Photoreceptor          |
| AGAGAGC db/db1  | db/db | 897  | 0.046025 | FALSE | 1.331438 | FALSE | Photoreceptor          |
| AGAGCAG db/db1  | db/db | 1053 | 0.065957 | FALSE | 2.134195 | FALSE | Photoreceptor          |
| AGAGCAG db/db1  | db/db | 1542 | 0.13452  | TRUE  | 8.872228 | TRUE  |                        |
| AGAGCAG db/db1  | db/db | 2738 | 0.018088 | FALSE | 0.600837 | FALSE | Endothelia EC-C4       |
| AGAGCAG db/db1  | db/db | 811  | 0.049679 | FALSE | 1.236471 | FALSE | Photoreceptor          |
| AGAGCAG db/db1  | db/db | 1320 | 0.032546 | FALSE | 1.40021  | FALSE | Endothelia Aterial EC  |
| AGAGCAG db/db1  | db/db | 1043 | 0.018422 | FALSE | 1.408057 | FALSE | Endothelia EC-C4       |
| AGAGCAG db/db1  | db/db | 3622 | 0.011081 | FALSE | 0.92522  | FALSE | Endothelia Venous EC   |
| AGAGCAG db/db1  | db/db | 3664 | 0.130374 | TRUE  | 2.847777 | FALSE |                        |
| AGAGCAG db/db1  | db/db | 3765 | 0.019106 | FALSE | 0.913712 | FALSE | Photoreceptor          |
| AGAGCAG db/db1  | db/db | 1037 | 0.040404 | FALSE | 1.346179 | FALSE | Photoreceptor          |
| AGAGCCC db/db1  | db/db | 4196 | 0.054795 | FALSE | 0.736887 | FALSE | Endothelia Venous EC   |
| AGAGCCC db/db1  | db/db | 402  | 0.015287 | FALSE | 2.339197 | FALSE | Pericyte               |
| AGAGCCC db/db1  | db/db | 1189 | 0.093319 | FALSE | 1.147422 | FALSE | Photoreceptor          |
| AGAGCCC db/db1  | db/db | 7617 | 0.010614 | FALSE | 0.42174  | FALSE | Photoreceptor          |
| AGAGCCC db/db1  | db/db | 695  | 0.068864 | FALSE | 2.154582 | FALSE | Muller cell            |
| AGAGCCC db/db1  | db/db | 876  | 0.029787 | FALSE | 1.901357 | FALSE | Photoreceptor          |
| AGAGCCC db/db1  | db/db | 966  | 0.101025 | TRUE  | 2.296451 | FALSE |                        |
| AGAGCCC db/db1  | db/db | 1825 | 0.08663  | FALSE | 11.80592 | TRUE  |                        |
| AGAGCCC db/db1  | db/db | 415  | 0.036232 | FALSE | 3.860105 | FALSE | Neuron                 |
| AGAGCCC db/db1  | db/db | 8871 | 0.013338 | FALSE | 0.384519 | FALSE | Photoreceptor          |
| AGAGCCC db/db1  | db/db | 3270 | 0.148377 | TRUE  | 3.208266 | FALSE |                        |
| AGATAGA db/db1  | db/db | 1485 | 0.024105 | FALSE | 1.160938 | FALSE | Endothelia Capillary E |
| AGATAGA db/db1  | db/db | 1286 | 0.020536 | FALSE | 1.398406 | FALSE | Endothelia Capillary E |
| AGATAGA db/db1  | db/db | 3321 | 0.098234 | FALSE | 1.136018 | FALSE | Endothelia Venous EC   |

|                 |       |      |          |       |          |       |                         |
|-----------------|-------|------|----------|-------|----------|-------|-------------------------|
| AGATAGA↓ db/db1 | db/db | 4162 | 0.026328 | FALSE | 0.848108 | FALSE | Endothelia Venous EC    |
| AGATAGA↓ db/db1 | db/db | 795  | 0.01981  | FALSE | 1.820301 | FALSE | Endothelia Capillary EC |
| AGATAGA↓ db/db1 | db/db | 745  | 0.060641 | FALSE | 1.656664 | FALSE | Photoreceptor           |
| AGATAGA↓ db/db1 | db/db | 608  | 0.04192  | FALSE | 1.44309  | FALSE | Photoreceptor           |
| AGATAGA↓ db/db1 | db/db | 439  | 0.049679 | FALSE | 3.157377 | FALSE | Muller cell             |
| AGATAGA↓ db/db1 | db/db | 4135 | 0.078788 | FALSE | 0.990777 | FALSE | Endothelia EC-C4        |
| AGATAGA↓ db/db1 | db/db | 1604 | 0.184701 | TRUE  | 3.98909  | FALSE |                         |
| AGATAGA↓ db/db1 | db/db | 593  | 0.022059 | FALSE | 0.83206  | FALSE | Photoreceptor           |
| AGATAGA↓ db/db1 | db/db | 5795 | 0.020536 | FALSE | 0.638891 | FALSE | Photoreceptor           |
| AGATCCA↓ db/db1 | db/db | 4131 | 0.025868 | FALSE | 0.980029 | FALSE | Endothelia Venous EC    |
| AGATCCA↓ db/db1 | db/db | 1263 | 0.054795 | FALSE | 1.298157 | FALSE | Photoreceptor           |
| AGATCCA↓ db/db1 | db/db | 355  | 0.032546 | FALSE | 3.924354 | FALSE | Muller cell             |
| AGATCCA↓ db/db1 | db/db | 3022 | 0.025868 | FALSE | 0.998756 | FALSE | Endothelia Venous EC    |
| AGATCCA↓ db/db1 | db/db | 1485 | 0.135645 | TRUE  | 3.705062 | FALSE |                         |
| AGATCCA↓ db/db1 | db/db | 2903 | 0.026796 | FALSE | 0.806112 | FALSE | Photoreceptor           |
| AGATCCA↓ db/db1 | db/db | 4490 | 0.021669 | FALSE | 0.873984 | FALSE | Endothelia EC-C4        |
| AGATCCA↓ db/db1 | db/db | 405  | 0.17103  | TRUE  | 7.977737 | TRUE  |                         |
| AGATCCAT db/db1 | db/db | 996  | 0.031411 | FALSE | 0.754269 | FALSE | Photoreceptor           |
| AGATCCAT db/db1 | db/db | 3274 | 0.024534 | FALSE | 1.518492 | FALSE | Photoreceptor           |
| AGATCCAT db/db1 | db/db | 4907 | 0.019455 | FALSE | 1.244851 | FALSE | Neuron                  |
| AGATCCAT db/db1 | db/db | 939  | 0.061912 | FALSE | 1.259383 | FALSE | Photoreceptor           |
| AGATCGT↓ db/db1 | db/db | 5977 | 0.033726 | FALSE | 0.553298 | FALSE | Photoreceptor           |
| AGATCGT↓ db/db1 | db/db | 981  | 0.065957 | FALSE | 1.425292 | FALSE | Photoreceptor           |
| AGATCGT↓ db/db1 | db/db | 4895 | 0.024534 | FALSE | 0.613894 | FALSE | Photoreceptor           |
| AGATCGT↓ db/db1 | db/db | 1719 | 0.043505 | FALSE | 0.951536 | FALSE | Photoreceptor           |
| AGATCGT↓ db/db1 | db/db | 2041 | 0.017114 | FALSE | 1.081869 | FALSE | Endothelia Venous EC    |
| AGATCGT↓ db/db1 | db/db | 3004 | 0.028251 | FALSE | 1.184974 | FALSE | Endothelia Venous EC    |
| AGATGAA↓ db/db1 | db/db | 777  | 0.038953 | FALSE | 0.829109 | FALSE | Photoreceptor           |
| AGATGAA↓ db/db1 | db/db | 1226 | 0.059406 | FALSE | 1.940788 | FALSE | Photoreceptor           |
| AGATGAA↓ db/db1 | db/db | 5560 | 0.041154 | FALSE | 0.831502 | FALSE | Photoreceptor           |
| AGATGAA↓ db/db1 | db/db | 5473 | 0.049679 | FALSE | 1.065862 | FALSE | Photoreceptor           |
| AGATGAA↓ db/db1 | db/db | 1092 | 0.100586 | TRUE  | 2.978724 | FALSE |                         |
| AGATGAA↓ db/db1 | db/db | 998  | 0.060641 | FALSE | 0.82172  | FALSE | Photoreceptor           |
| AGATGAA↓ db/db1 | db/db | 739  | 0.034334 | FALSE | 1.412508 | FALSE | Photoreceptor           |
| AGATGCT↓ db/db1 | db/db | 7229 | 0.015879 | FALSE | 0.40329  | FALSE | Photoreceptor           |
| AGATGCT↓ db/db1 | db/db | 844  | 0.076994 | FALSE | 1.461921 | FALSE | Photoreceptor           |
| AGATGCT↓ db/db1 | db/db | 418  | 0.05065  | FALSE | 2.206396 | FALSE | Photoreceptor           |
| AGATGCT↓ db/db1 | db/db | 5963 | 0.014711 | FALSE | 0.520065 | FALSE | Photoreceptor           |
| AGATGCT↓ db/db1 | db/db | 2420 | 0.020171 | FALSE | 1.051375 | FALSE | Photoreceptor           |
| AGATGCT↓ db/db1 | db/db | 4119 | 0.045165 | FALSE | 0.829179 | FALSE | Endothelia Venous EC    |
| AGATGCT↓ db/db1 | db/db | 544  | 0.053718 | FALSE | 2.093408 | FALSE | Endothelia Capillary EC |
| AGATGCT↓ db/db1 | db/db | 3567 | 0.045165 | FALSE | 0.924637 | FALSE | Photoreceptor           |
| AGCATCA↓ db/db1 | db/db | 917  | 0.036232 | FALSE | 1.451375 | FALSE | Endothelia Capillary EC |
| AGCATCA↓ db/db1 | db/db | 870  | 0.016181 | FALSE | 1.47389  | FALSE | Endothelia Capillary EC |
| AGCATCA↓ db/db1 | db/db | 3003 | 0.031973 | FALSE | 1.065905 | FALSE | Endothelia Venous EC    |
| AGCATCA↓ db/db1 | db/db | 1516 | 0.034954 | FALSE | 2.482384 | FALSE | Muller cell             |
| AGCATCAT db/db1 | db/db | 7493 | 0.044326 | FALSE | 0.474007 | FALSE | Photoreceptor           |



|                 |       |      |          |       |          |       |                        |
|-----------------|-------|------|----------|-------|----------|-------|------------------------|
| AGCCAAT# db/db1 | db/db | 971  | 0.048732 | FALSE | 0.991453 | FALSE | Photoreceptor          |
| AGCCAAT# db/db1 | db/db | 354  | 0.030859 | FALSE | 2.122795 | FALSE | Pericyte               |
| AGCCAAT# db/db1 | db/db | 670  | 0.04192  | FALSE | 4.202123 | FALSE | Muller cell            |
| AGCCAAT# db/db1 | db/db | 1631 | 0.022857 | FALSE | 1.237904 | FALSE | Endothelia Aterial EC  |
| AGCCAAT# db/db1 | db/db | 2904 | 0.01981  | FALSE | 0.838577 | FALSE | Endothelia Venous EC   |
| AGCCAATT db/db1 | db/db | 1751 | 0.008032 | FALSE | 1.563115 | FALSE | Endothelia Capillary E |
| AGCCACG# db/db1 | db/db | 851  | 0.04192  | FALSE | 1.914414 | FALSE | Muller cell            |
| AGCCACG# db/db1 | db/db | 786  | 0.060641 | FALSE | 1.033181 | FALSE | Photoreceptor          |
| AGCCACG# db/db1 | db/db | 3210 | 0.067388 | FALSE | 1.316366 | FALSE | Photoreceptor          |
| AGCCACG# db/db1 | db/db | 1759 | 0.039671 | FALSE | 1.148364 | FALSE | Photoreceptor          |
| AGCCACG# db/db1 | db/db | 3465 | 0.028754 | FALSE | 0.749435 | FALSE | Endothelia Venous EC   |
| AGCCACG# db/db1 | db/db | 416  | 0.059406 | FALSE | 0.594613 | FALSE | Photoreceptor          |
| AGCCACG# db/db1 | db/db | 1500 | 0.010157 | FALSE | 1.221044 | FALSE | Pericyte               |
| AGCCACG# db/db1 | db/db | 448  | 0.130259 | TRUE  | 3.773585 | FALSE |                        |
| AGCCACG# db/db1 | db/db | 3689 | 0.040404 | FALSE | 0.859494 | FALSE | Photoreceptor          |
| AGCCACG# db/db1 | db/db | 6252 | 0.015879 | FALSE | 0.380058 | FALSE | Photoreceptor          |
| AGCCACG# db/db1 | db/db | 1638 | 0.007058 | FALSE | 0.832607 | FALSE | Endothelia Capillary E |
| AGCCACG# db/db1 | db/db | 1730 | 0.012303 | FALSE | 1.24068  | FALSE | Endothelia Aterial EC  |
| AGCCACG# db/db1 | db/db | 1072 | 0.039671 | FALSE | 4.449488 | FALSE | Muller cell            |
| AGCCACG# db/db1 | db/db | 4248 | 0.019455 | FALSE | 0.658377 | FALSE | Photoreceptor          |
| AGCCACG# db/db1 | db/db | 986  | 0.014997 | FALSE | 0.584359 | FALSE | Photoreceptor          |
| AGCGATT# db/db1 | db/db | 1834 | 0.051646 | FALSE | 1.378891 | FALSE | Photoreceptor          |
| AGCGATT# db/db1 | db/db | 789  | 0.016181 | FALSE | 2.219915 | FALSE | Pericyte               |
| AGCGATT# db/db1 | db/db | 2832 | 0.022455 | FALSE | 1.040474 | FALSE | Endothelia Venous EC   |
| AGCGATT# db/db1 | db/db | 949  | 0.038251 | FALSE | 1.227359 | FALSE | Photoreceptor          |
| AGCGATT# db/db1 | db/db | 916  | 0.084562 | FALSE | 1.947998 | FALSE | Muller cell            |
| AGCGATT# db/db1 | db/db | 3937 | 0.027273 | FALSE | 0.930238 | FALSE | Endothelia EC-C4       |
| AGCGATT# db/db1 | db/db | 4019 | 0.024105 | FALSE | 0.898048 | FALSE | Endothelia Venous EC   |
| AGCGATT# db/db1 | db/db | 454  | 0.076994 | FALSE | 3.310258 | FALSE | Photoreceptor          |
| AGCGATT# db/db1 | db/db | 705  | 0.042704 | FALSE | 3.147688 | FALSE | Photoreceptor          |
| AGCGATT# db/db1 | db/db | 5319 | 0.059406 | FALSE | 0.94833  | FALSE | Endothelia Capillary E |
| AGCGATT# db/db1 | db/db | 553  | 0.057037 | FALSE | 1.621403 | FALSE | Photoreceptor          |
| AGCGCCA# db/db1 | db/db | 677  | 0.098234 | FALSE | 2.092571 | FALSE | Muller cell            |
| AGCGCCA# db/db1 | db/db | 820  | 0.041154 | FALSE | 2.069155 | FALSE | Pericyte               |
| AGCGCCA# db/db1 | db/db | 1633 | 0.103567 | TRUE  | 9.168268 | TRUE  |                        |
| AGCGCCA# db/db1 | db/db | 2391 | 0.159016 | TRUE  | 3.994323 | FALSE |                        |
| AGCGCCA# db/db1 | db/db | 3513 | 0.025868 | FALSE | 0.945375 | FALSE | Endothelia Capillary E |
| AGCGCCA# db/db1 | db/db | 4223 | 0.018422 | FALSE | 0.852735 | FALSE | Endothelia Venous EC   |
| AGCGCCA# db/db1 | db/db | 1391 | 0.013074 | FALSE | 1.152581 | FALSE | Endothelia Capillary E |
| AGCGCCA# db/db1 | db/db | 5242 | 0.019106 | FALSE | 0.827573 | FALSE | Photoreceptor          |
| AGCGCTG# db/db1 | db/db | 1312 | 0.032546 | FALSE | 1.302403 | FALSE | Endothelia Venous EC   |
| AGCGCTG# db/db1 | db/db | 1246 | 0.007441 | FALSE | 1.117552 | FALSE | Pericyte               |
| AGCGCTG# db/db1 | db/db | 2971 | 0.027758 | FALSE | 0.873298 | FALSE | Endothelia EC-C4       |
| AGCGCTG# db/db1 | db/db | 4137 | 0.043505 | FALSE | 1.060037 | FALSE | Endothelia Venous EC   |
| AGCGCTG# db/db1 | db/db | 1050 | 0.007249 | FALSE | 1.115867 | FALSE | Endothelia Capillary E |
| AGCGCTG# db/db1 | db/db | 3768 | 0.053718 | FALSE | 0.860496 | FALSE | Photoreceptor          |
| AGCGCTG# db/db1 | db/db | 2201 | 0.013338 | FALSE | 1.279286 | FALSE | Photoreceptor          |

|          |        |       |       |          |       |          |       |                        |
|----------|--------|-------|-------|----------|-------|----------|-------|------------------------|
| AGCGCTG  | db/db1 | db/db | 1405  | 0.013876 | FALSE | 1.580538 | FALSE | Endothelia Capillary E |
| AGCGTAT  | db/db1 | db/db | 4668  | 0.012052 | FALSE | 0.635964 | FALSE | Photoreceptor          |
| AGCGTAT  | db/db1 | db/db | 5597  | 0.063221 | FALSE | 0.876965 | FALSE | Endothelia Capillary E |
| AGCGTAT  | db/db1 | db/db | 4344  | 0.027273 | FALSE | 0.999819 | FALSE | Endothelia Venous EC   |
| AGCGTAT  | db/db1 | db/db | 1888  | 0.252153 | TRUE  | 0.571102 | FALSE |                        |
| AGCGTAT  | db/db1 | db/db | 1451  | 0.076994 | FALSE | 6.766008 | TRUE  |                        |
| AGCGTAT  | db/db1 | db/db | 5492  | 0.030318 | FALSE | 0.680659 | FALSE | Photoreceptor          |
| AGCGTAT  | db/db1 | db/db | 1760  | 0.012052 | FALSE | 1.016576 | FALSE | Endothelia Capillary E |
| AGCGTAT  | db/db1 | db/db | 1821  | 0.024971 | FALSE | 0.599889 | FALSE | Photoreceptor          |
| AGCGTAT  | db/db1 | db/db | 2647  | 0.043505 | FALSE | 0.499529 | FALSE | Photoreceptor          |
| AGCGTCG  | db/db1 | db/db | 590   | 0.095727 | FALSE | 1.88551  | FALSE | Photoreceptor          |
| AGCGTCG  | db/db1 | db/db | 822   | 0.023266 | FALSE | 1.276981 | FALSE | Endothelia Venous EC   |
| AGCGTCG  | db/db1 | db/db | 1099  | 0.034334 | FALSE | 1.885809 | FALSE | Endothelia Capillary E |
| AGCGTCG  | db/db1 | db/db | 732   | 0.006499 | FALSE | 1.419741 | FALSE | Endothelia EC-C4       |
| AGCGTCG  | db/db1 | db/db | 596   | 0.054795 | FALSE | 2.717472 | FALSE | Photoreceptor          |
| AGCGTCG  | db/db1 | db/db | 1032  | 0.047807 | FALSE | 1.139846 | FALSE | Photoreceptor          |
| AGCGTCG  | db/db1 | db/db | 649   | 0.028251 | FALSE | 0.433241 | FALSE | Photoreceptor          |
| AGCTACAC | db/db1 | db/db | 467   | 0.042704 | FALSE | 2.903261 | FALSE | Muller cell            |
| AGCTACAC | db/db1 | db/db | 2050  | 0.057037 | FALSE | 1.343372 | FALSE | Photoreceptor          |
| AGCTACAT | db/db1 | db/db | 2023  | 0.037564 | FALSE | 1.143933 | FALSE | Endothelia EC-C4       |
| AGCTACAT | db/db1 | db/db | 4664  | 0.018088 | FALSE | 0.609247 | FALSE | Photoreceptor          |
| AGCTCAA  | db/db1 | db/db | 3438  | 0.143776 | TRUE  | 4.207472 | FALSE |                        |
| AGCTCAA  | db/db1 | db/db | 1422  | 0.037564 | FALSE | 0.71168  | FALSE | Photoreceptor          |
| AGCTCAA  | db/db1 | db/db | 844   | 0.043505 | FALSE | 1.858434 | FALSE | Photoreceptor          |
| AGCTCAAC | db/db1 | db/db | 620   | 0.036891 | FALSE | 0.926454 | FALSE | Photoreceptor          |
| AGCTCAAC | db/db1 | db/db | 4544  | 0.017758 | FALSE | 0.93889  | FALSE | Photoreceptor          |
| AGCTCAAC | db/db1 | db/db | 1571  | 0.026796 | FALSE | 1.486056 | FALSE | Endothelia Capillary E |
| AGCTCAAT | db/db1 | db/db | 5220  | 0.01981  | FALSE | 0.927588 | FALSE | Endothelia EC-C4       |
| AGCTTCCA | db/db1 | db/db | 718   | 0.045165 | FALSE | 2.078778 | FALSE | Photoreceptor          |
| AGCTTCCC | db/db1 | db/db | 10169 | 0.036891 | FALSE | 0.251045 | FALSE | Photoreceptor          |
| AGGAAAT  | db/db1 | db/db | 382   | 0.017434 | FALSE | 0.902382 | FALSE | Pericyte               |
| AGGAAAT  | db/db1 | db/db | 5724  | 0.011319 | FALSE | 1.032225 | FALSE | Neuron                 |
| AGGAAAT  | db/db1 | db/db | 8189  | 0.031411 | FALSE | 0.474152 | FALSE | Photoreceptor          |
| AGGAAAT  | db/db1 | db/db | 4004  | 0.060641 | FALSE | 1.235637 | FALSE | Photoreceptor          |
| AGGAAAT  | db/db1 | db/db | 751   | 0.013338 | FALSE | 1.28235  | FALSE | Endothelia Capillary E |
| AGGAAAT  | db/db1 | db/db | 1016  | 0.024971 | FALSE | 1.588266 | FALSE | Endothelia EC-C4       |
| AGGAAAT  | db/db1 | db/db | 4661  | 0.029787 | FALSE | 0.810937 | FALSE | Photoreceptor          |
| AGGAAAT  | db/db1 | db/db | 442   | 0.076994 | FALSE | 2.059611 | FALSE | Photoreceptor          |
| AGGAAAT  | db/db1 | db/db | 3449  | 0.034954 | FALSE | 0.884571 | FALSE | Endothelia EC-C4       |
| AGGAATA  | db/db1 | db/db | 3520  | 0.041154 | FALSE | 0.906185 | FALSE | Photoreceptor          |
| AGGAATA  | db/db1 | db/db | 2876  | 0.036891 | FALSE | 0.967428 | FALSE | Endothelia Capillary E |
| AGGAATA  | db/db1 | db/db | 1773  | 0.112477 | TRUE  | 1.801363 | FALSE |                        |
| AGGAATA  | db/db1 | db/db | 3620  | 0.024105 | FALSE | 0.916056 | FALSE | Endothelia Venous EC   |
| AGGAATA  | db/db1 | db/db | 1150  | 0.005782 | FALSE | 1.531792 | FALSE | Pericyte               |
| AGGAATA  | db/db1 | db/db | 3575  | 0.020908 | FALSE | 0.678686 | FALSE | Endothelia EC-C4       |
| AGGAATA  | db/db1 | db/db | 5653  | 0.115641 | TRUE  | 4.315095 | FALSE |                        |
| AGGACGA  | db/db1 | db/db | 7979  | 0.025416 | FALSE | 0.510483 | FALSE | Photoreceptor          |

|                |       |      |          |       |          |       |                        |
|----------------|-------|------|----------|-------|----------|-------|------------------------|
| AGGACGA db/db1 | db/db | 3608 | 0.015287 | FALSE | 1.12112  | FALSE | Endothelia EC-C4       |
| AGGACGA db/db1 | db/db | 4793 | 0.028251 | FALSE | 0.912262 | FALSE | Photoreceptor          |
| AGGACGA db/db1 | db/db | 573  | 0.032546 | FALSE | 2.290023 | FALSE | Endothelia Capillary E |
| AGGACGA db/db1 | db/db | 808  | 0.03313  | FALSE | 0.664232 | FALSE | Photoreceptor          |
| AGGACGA db/db1 | db/db | 650  | 0.071958 | FALSE | 2.339023 | FALSE | Muller cell            |
| AGGACGA db/db1 | db/db | 666  | 0.019106 | FALSE | 2.994745 | FALSE | Muller cell            |
| AGGACGA db/db1 | db/db | 3411 | 0.025868 | FALSE | 0.880789 | FALSE | Endothelia Venous EC   |
| AGGACGA db/db1 | db/db | 3047 | 0.024534 | FALSE | 1.254784 | FALSE | Photoreceptor          |
| AGGACGA db/db1 | db/db | 504  | 0.082569 | FALSE | 2.476591 | FALSE | Endothelia Capillary E |
| AGGACGA db/db1 | db/db | 1562 | 0.05065  | FALSE | 1.092139 | FALSE | Photoreceptor          |
| AGGACTT db/db1 | db/db | 1230 | 0.007249 | FALSE | 1.094947 | FALSE | Endothelia Capillary E |
| AGGACTT db/db1 | db/db | 1787 | 0.051646 | FALSE | 1.243355 | FALSE | Endothelia Capillary E |
| AGGACTT db/db1 | db/db | 6527 | 0.015581 | FALSE | 0.599341 | FALSE | Photoreceptor          |
| AGGACTT db/db1 | db/db | 1234 | 0.030859 | FALSE | 0.438767 | FALSE | Photoreceptor          |
| AGGACTT db/db1 | db/db | 827  | 0.052669 | FALSE | 2.478304 | FALSE | Endothelia Capillary E |
| AGGACTT db/db1 | db/db | 1635 | 0.218615 | TRUE  | 3.509852 | FALSE |                        |
| AGGACTT db/db1 | db/db | 7443 | 0.016488 | FALSE | 0.546051 | FALSE | Photoreceptor          |
| AGGAGGT db/db1 | db/db | 6897 | 0.017114 | FALSE | 0.515672 | FALSE | Photoreceptor          |
| AGGAGGT db/db1 | db/db | 378  | 0.025868 | FALSE | 3.316832 | FALSE | Muller cell            |
| AGGAGGT db/db1 | db/db | 358  | 0.052669 | FALSE | 4.183868 | FALSE | Muller cell            |
| AGGAGGT db/db1 | db/db | 802  | 0.026328 | FALSE | 2.998228 | FALSE | Neuron                 |
| AGGAGGT db/db1 | db/db | 948  | 0.098234 | FALSE | 5.526116 | TRUE  |                        |
| AGGAGGT db/db1 | db/db | 1357 | 0.024105 | FALSE | 0.905249 | FALSE | Endothelia Capillary E |
| AGGAGGT db/db1 | db/db | 1539 | 0.045165 | FALSE | 1.271091 | FALSE | Pericyte               |
| AGGAGGT db/db1 | db/db | 443  | 0.012557 | FALSE | 1.094287 | FALSE | Endothelia Capillary E |
| AGGAGGT db/db1 | db/db | 2368 | 0.027758 | FALSE | 1.084357 | FALSE | Endothelia EC-C4       |
| AGGATAA db/db1 | db/db | 395  | 0.107546 | TRUE  | 3.214286 | FALSE |                        |
| AGGATAA db/db1 | db/db | 336  | 0.055901 | FALSE | 3.483317 | FALSE | Muller cell            |
| AGGATAA db/db1 | db/db | 7482 | 0.028251 | FALSE | 0.541514 | FALSE | Photoreceptor          |
| AGGATAA db/db1 | db/db | 1185 | 0.010384 | FALSE | 1.516239 | FALSE | Endothelia Capillary E |
| AGGATAA db/db1 | db/db | 2428 | 0.080645 | FALSE | 0.988301 | FALSE | Photoreceptor          |
| AGGATAA db/db1 | db/db | 1841 | 0.073582 | FALSE | 2.026969 | FALSE | Muller cell            |
| AGGATAA db/db1 | db/db | 560  | 0.038251 | FALSE | 2.519205 | FALSE | Muller cell            |
| AGGATAA db/db1 | db/db | 857  | 0.064568 | FALSE | 1.852336 | FALSE | Photoreceptor          |
| AGGATAA db/db1 | db/db | 547  | 0.200401 | TRUE  | 11.73333 | TRUE  |                        |
| AGGATAA db/db1 | db/db | 784  | 0.063221 | FALSE | 1.081539 | FALSE | Photoreceptor          |
| AGGATAA db/db1 | db/db | 7178 | 0.031411 | FALSE | 0.629539 | FALSE | Photoreceptor          |
| AGGATAA db/db1 | db/db | 402  | 0.038953 | FALSE | 1.08158  | FALSE | Muller cell            |
| AGGATAA db/db1 | db/db | 1193 | 0.040404 | FALSE | 0.407429 | FALSE | Photoreceptor          |
| AGGATAA db/db1 | db/db | 2135 | 0.031973 | FALSE | 1.146372 | FALSE | Endothelia EC-C4       |
| AGGATAA db/db1 | db/db | 2164 | 0.040404 | FALSE | 1.17339  | FALSE | Photoreceptor          |
| AGGATCT db/db1 | db/db | 8645 | 0.044326 | FALSE | 0.591247 | FALSE | Photoreceptor          |
| AGGATCT db/db1 | db/db | 2139 | 0.036891 | FALSE | 1.044506 | FALSE | Endothelia Aterial EC  |
| AGGATCT db/db1 | db/db | 1426 | 0.063221 | FALSE | 1.437419 | FALSE | Photoreceptor          |
| AGGATCT db/db1 | db/db | 1921 | 0.030859 | FALSE | 1.316867 | FALSE | Microglia              |
| AGGATCT db/db1 | db/db | 3308 | 0.058205 | FALSE | 0.71043  | FALSE | Endothelia EC-C4       |
| AGGATCT db/db1 | db/db | 861  | 0.016488 | FALSE | 1.950067 | FALSE | Endothelia Capillary E |

|                 |       |      |          |       |          |       |                        |
|-----------------|-------|------|----------|-------|----------|-------|------------------------|
| AGGATCTC db/db1 | db/db | 1454 | 0.031411 | FALSE | 1.220604 | FALSE | Endothelia Capillary E |
| AGGATCTC db/db1 | db/db | 1249 | 0.034954 | FALSE | 1.147659 | FALSE | Photoreceptor          |
| AGGATCTT db/db1 | db/db | 4024 | 0.023682 | FALSE | 0.713202 | FALSE | Photoreceptor          |
| AGGATCTT db/db1 | db/db | 979  | 0.017434 | FALSE | 1.942271 | FALSE | Endothelia Capillary E |
| AGGATCTT db/db1 | db/db | 2121 | 0.023682 | FALSE | 1.074727 | FALSE | Photoreceptor          |
| AGGATCTT db/db1 | db/db | 1296 | 0.08663  | FALSE | 0.818471 | FALSE | Photoreceptor          |
| AGGATCTT db/db1 | db/db | 1054 | 0.118221 | TRUE  | 2.740408 | FALSE |                        |
| AGGCATT/ db/db1 | db/db | 689  | 0.164835 | TRUE  | 3.196803 | FALSE |                        |
| AGGCATT/ db/db1 | db/db | 6097 | 0.029266 | FALSE | 0.722673 | FALSE | Photoreceptor          |
| AGGCATT/ db/db1 | db/db | 739  | 0.027273 | FALSE | 0.57547  | FALSE | Photoreceptor          |
| AGGCATT/ db/db1 | db/db | 1520 | 0.126958 | TRUE  | 1.94704  | FALSE |                        |
| AGGCATT/ db/db1 | db/db | 1995 | 0.033726 | FALSE | 0.659452 | FALSE | Photoreceptor          |
| AGGCATT/ db/db1 | db/db | 1365 | 0.098234 | FALSE | 2.421846 | FALSE | Muller cell            |
| AGGCATT/ db/db1 | db/db | 7522 | 0.015287 | FALSE | 0.503436 | FALSE | Photoreceptor          |
| AGGCCAC/ db/db1 | db/db | 4646 | 0.01981  | FALSE | 0.912214 | FALSE | Endothelia Capillary E |
| AGGCCAC/ db/db1 | db/db | 487  | 0.076994 | FALSE | 1.223598 | FALSE | Photoreceptor          |
| AGGCCAC/ db/db1 | db/db | 5254 | 0.039671 | FALSE | 0.800618 | FALSE | Endothelia Capillary E |
| AGGCCAC/ db/db1 | db/db | 1851 | 0.091004 | FALSE | 1.127186 | FALSE | Photoreceptor          |
| AGGCCAC/ db/db1 | db/db | 1484 | 0.011081 | FALSE | 1.169577 | FALSE | Endothelia Capillary E |
| AGGCCAC/ db/db1 | db/db | 1386 | 0.025868 | FALSE | 1.701144 | FALSE | Pericyte               |
| AGGCCAC/ db/db1 | db/db | 2718 | 0.038251 | FALSE | 0.58293  | FALSE | Neuron                 |
| AGGCCAC/ db/db1 | db/db | 423  | 0.065957 | FALSE | 7.736944 | TRUE  |                        |
| AGGCCAC/ db/db1 | db/db | 911  | 0.039671 | FALSE | 3.101263 | FALSE | Muller cell            |
| AGGCCAC/ db/db1 | db/db | 8135 | 0.382671 | TRUE  | 1.835172 | FALSE |                        |
| AGGCCAC/ db/db1 | db/db | 696  | 0.020171 | FALSE | 0.684921 | FALSE | Photoreceptor          |
| AGGCCAC/ db/db1 | db/db | 1936 | 0.011805 | FALSE | 1.112325 | FALSE | Photoreceptor          |
| AGGCTGC/ db/db1 | db/db | 2448 | 0.038953 | FALSE | 0.817585 | FALSE | Endothelia Venous EC   |
| AGGCTGC/ db/db1 | db/db | 3249 | 0.036232 | FALSE | 0.809854 | FALSE | Photoreceptor          |
| AGGCTGC/ db/db1 | db/db | 1705 | 0.022455 | FALSE | 0.941133 | FALSE | Endothelia EC-C4       |
| AGGCTGC/ db/db1 | db/db | 1018 | 0.030859 | FALSE | 1.165272 | FALSE | Endothelia EC-C4       |
| AGGCTGC/ db/db1 | db/db | 3198 | 0.445833 | TRUE  | 2.196169 | FALSE |                        |
| AGGCTGC/ db/db1 | db/db | 4234 | 0.05065  | FALSE | 0.913677 | FALSE | Photoreceptor          |
| AGGCTGC/ db/db1 | db/db | 922  | 0.051646 | FALSE | 1.133469 | FALSE | Photoreceptor          |
| AGGCTGC/ db/db1 | db/db | 878  | 0.025868 | FALSE | 0.941645 | FALSE | Photoreceptor          |
| AGGCTGC/ db/db1 | db/db | 592  | 0.012052 | FALSE | 2.016715 | FALSE | Endothelia Capillary E |
| AGGCTGC/ db/db1 | db/db | 2068 | 0.022455 | FALSE | 1.193507 | FALSE | Endothelia Capillary E |
| AGGCTGC/ db/db1 | db/db | 4525 | 0.053718 | FALSE | 0.920437 | FALSE | Photoreceptor          |
| AGGCTGC/ db/db1 | db/db | 2394 | 0.037564 | FALSE | 1.391043 | FALSE | Photoreceptor          |
| AGGCTGC/ db/db1 | db/db | 2529 | 0.020908 | FALSE | 0.925744 | FALSE | Endothelia Capillary E |
| AGGGAGT/ db/db1 | db/db | 3475 | 0.028754 | FALSE | 0.304136 | FALSE | Photoreceptor          |
| AGGGAGT/ db/db1 | db/db | 1051 | 0.046906 | FALSE | 1.289855 | FALSE | Photoreceptor          |
| AGGGAGT/ db/db1 | db/db | 2316 | 0.048732 | FALSE | 0.763976 | FALSE | Photoreceptor          |
| AGGGAGT/ db/db1 | db/db | 578  | 0.070386 | FALSE | 3.254869 | FALSE | Muller cell            |
| AGGGAGT/ db/db1 | db/db | 814  | 0.071958 | FALSE | 1.202131 | FALSE | Photoreceptor          |
| AGGGCCT/ db/db1 | db/db | 3606 | 0.022455 | FALSE | 0.826432 | FALSE | Photoreceptor          |
| AGGGCCT/ db/db1 | db/db | 906  | 0.022857 | FALSE | 1.788135 | FALSE | Endothelia EC-C4       |
| AGGGCCT/ db/db1 | db/db | 1716 | 0.130374 | TRUE  | 6.131588 | TRUE  |                        |

|                 |       |      |          |       |          |       |                        |
|-----------------|-------|------|----------|-------|----------|-------|------------------------|
| AGGGCCTC db/db1 | db/db | 6882 | 0.070386 | FALSE | 0.573148 | FALSE | Photoreceptor          |
| AGGGCCTC db/db1 | db/db | 3736 | 0.020171 | FALSE | 0.897846 | FALSE | Endothelia Venous EC   |
| AGGGCCTC db/db1 | db/db | 799  | 0.075259 | FALSE | 10.02639 | TRUE  |                        |
| AGGGCCTC db/db1 | db/db | 2480 | 0.019455 | FALSE | 1.113725 | FALSE | Endothelia Aterial EC  |
| AGGGCTCC db/db1 | db/db | 1840 | 0.058205 | FALSE | 1.229812 | FALSE | Endothelia Capillary E |
| AGGGCTCC db/db1 | db/db | 1155 | 0.012814 | FALSE | 1.189196 | FALSE | Endothelia Capillary E |
| AGGGCTCC db/db1 | db/db | 1089 | 0.052669 | FALSE | 1.272717 | FALSE | Photoreceptor          |
| AGGGCTCC db/db1 | db/db | 1120 | 0.023266 | FALSE | 1.437166 | FALSE | Endothelia Capillary E |
| AGGGCTCC db/db1 | db/db | 4135 | 0.159016 | TRUE  | 3.25026  | FALSE |                        |
| AGGGCTCC db/db1 | db/db | 5792 | 0.159016 | TRUE  | 1.419308 | FALSE |                        |
| AGGGTCCC db/db1 | db/db | 1860 | 0.055901 | FALSE | 0.727065 | FALSE | Photoreceptor          |
| AGGGTCCC db/db1 | db/db | 1919 | 0.042704 | FALSE | 1.282707 | FALSE | Photoreceptor          |
| AGGGTCCC db/db1 | db/db | 4320 | 0.025868 | FALSE | 1.05082  | FALSE | Photoreceptor          |
| AGGGTCCC db/db1 | db/db | 626  | 0.075259 | FALSE | 1.515438 | FALSE | Photoreceptor          |
| AGGGTCCC db/db1 | db/db | 1428 | 0.017758 | FALSE | 1.286016 | FALSE | Endothelia Capillary E |
| AGGGTCCC db/db1 | db/db | 2118 | 0.014997 | FALSE | 1.189898 | FALSE | Endothelia Venous EC   |
| AGGGTCCC db/db1 | db/db | 7562 | 0.016799 | FALSE | 0.508881 | FALSE | Photoreceptor          |
| AGGGTCCC db/db1 | db/db | 1152 | 0.075259 | FALSE | 1.039292 | FALSE | Photoreceptor          |
| AGGGTCCC db/db1 | db/db | 463  | 0.084562 | FALSE | 6.351791 | TRUE  |                        |
| AGGGTCCC db/db1 | db/db | 7736 | 0.020536 | FALSE | 0.735156 | FALSE | Photoreceptor          |
| AGGGTGA db/db1  | db/db | 566  | 0.059406 | FALSE | 2.395038 | FALSE | Endothelia Capillary E |
| AGGGTGA db/db1  | db/db | 5191 | 0.034334 | FALSE | 0.92139  | FALSE | Photoreceptor          |
| AGGGTGA db/db1  | db/db | 476  | 0.020908 | FALSE | 0.855865 | FALSE | Photoreceptor          |
| AGGGTGA db/db1  | db/db | 5005 | 0.033726 | FALSE | 0.931283 | FALSE | Photoreceptor          |
| AGGGTGA db/db1  | db/db | 596  | 0.071958 | FALSE | 1.125254 | FALSE | Photoreceptor          |
| AGGGTGA db/db1  | db/db | 688  | 0.029787 | FALSE | 2.37992  | FALSE | Muller cell            |
| AGGGTGA db/db1  | db/db | 2860 | 0.014429 | FALSE | 1.084762 | FALSE | Endothelia EC-C4       |
| AGGGTGA db/db1  | db/db | 690  | 0.024105 | FALSE | 1.011961 | FALSE | Photoreceptor          |
| AGGGTGA db/db1  | db/db | 840  | 0.036891 | FALSE | 0.753419 | FALSE | Photoreceptor          |
| AGGGTTT db/db1  | db/db | 1780 | 0.075259 | FALSE | 0.984201 | FALSE | Photoreceptor          |
| AGGGTTT db/db1  | db/db | 1401 | 0.025416 | FALSE | 1.35199  | FALSE | Photoreceptor          |
| AGGGTTT db/db1  | db/db | 645  | 0.035586 | FALSE | 2.863326 | FALSE | Muller cell            |
| AGGGTTT db/db1  | db/db | 2112 | 0.010384 | FALSE | 0.711895 | FALSE | Endothelia Venous EC   |
| AGGGTTT db/db1  | db/db | 1261 | 0.061912 | FALSE | 18.09487 | TRUE  |                        |
| AGGGTTT db/db1  | db/db | 4299 | 0.026796 | FALSE | 0.3682   | FALSE | Photoreceptor          |
| AGGTAGG db/db1  | db/db | 3192 | 0.122691 | TRUE  | 2.814229 | FALSE |                        |
| AGGTAGG db/db1  | db/db | 1285 | 0.030318 | FALSE | 1.307298 | FALSE | Endothelia Capillary E |
| AGGTAGG db/db1  | db/db | 2643 | 0.115723 | TRUE  | 3.965742 | FALSE |                        |
| AGGTAGG db/db1  | db/db | 5989 | 0.016488 | FALSE | 0.223103 | FALSE | Photoreceptor          |
| AGGTAGG db/db1  | db/db | 1387 | 0.028754 | FALSE | 2.963981 | FALSE | Muller cell            |
| AGGTAGG db/db1  | db/db | 2835 | 0.045165 | FALSE | 1.073851 | FALSE | Photoreceptor          |
| AGGTCAT db/db1  | db/db | 2724 | 0.018088 | FALSE | 0.945998 | FALSE | Photoreceptor          |
| AGGTCAT db/db1  | db/db | 2164 | 0.016488 | FALSE | 1.002043 | FALSE | Endothelia EC-C4       |
| AGGTCAT db/db1  | db/db | 5120 | 0.036891 | FALSE | 0.768658 | FALSE | Photoreceptor          |
| AGGTCAT db/db1  | db/db | 686  | 0.047807 | FALSE | 0.529829 | FALSE | Photoreceptor          |
| AGGTCAT db/db1  | db/db | 2335 | 0.030318 | FALSE | 1.037889 | FALSE | Photoreceptor          |
| AGGTCAT db/db1  | db/db | 1904 | 0.103567 | TRUE  | 1.254848 | FALSE |                        |

|                 |       |      |          |       |          |       |                        |
|-----------------|-------|------|----------|-------|----------|-------|------------------------|
| AGGTCATT db/db1 | db/db | 805  | 0.005264 | FALSE | 1.260588 | FALSE | Endothelia Capillary E |
| AGGTCATT db/db1 | db/db | 3955 | 0.065957 | FALSE | 1.129291 | FALSE | Photoreceptor          |
| AGGTCATT db/db1 | db/db | 723  | 0.095727 | FALSE | 2.240016 | FALSE | Endothelia Capillary E |
| AGGTCTA db/db1  | db/db | 2693 | 0.039671 | FALSE | 0.943714 | FALSE | Photoreceptor          |
| AGGTCTA db/db1  | db/db | 2171 | 0.071958 | FALSE | 0.954332 | FALSE | Photoreceptor          |
| AGGTCTAC db/db1 | db/db | 3448 | 0.013338 | FALSE | 0.984745 | FALSE | Endothelia Venous EC   |
| AGGTCTAC db/db1 | db/db | 793  | 0.035586 | FALSE | 1.75534  | FALSE | Neuron                 |
| AGGTCTAC db/db1 | db/db | 908  | 0.036891 | FALSE | 1.767604 | FALSE | Endothelia Capillary E |
| AGGTCTAC db/db1 | db/db | 1283 | 0.055901 | FALSE | 1.444561 | FALSE | Photoreceptor          |
| AGGTCTAC db/db1 | db/db | 6285 | 0.042704 | FALSE | 0.850811 | FALSE | Photoreceptor          |
| AGGTCTAC db/db1 | db/db | 621  | 0.042704 | FALSE | 1.810141 | FALSE | Photoreceptor          |
| AGGTCTAT db/db1 | db/db | 3789 | 0.015879 | FALSE | 0.967875 | FALSE | Photoreceptor          |
| AGGTCTAT db/db1 | db/db | 1631 | 0.139562 | TRUE  | 2.957359 | FALSE |                        |
| AGGTGTT db/db1  | db/db | 8616 | 0.015581 | FALSE | 0.500182 | FALSE | Photoreceptor          |
| AGGTGTT db/db1  | db/db | 731  | 0.048732 | FALSE | 0.688188 | FALSE | Photoreceptor          |
| AGGTGTT db/db1  | db/db | 2196 | 0.021669 | FALSE | 0.734674 | FALSE | Photoreceptor          |
| AGGTGTT db/db1  | db/db | 3492 | 0.022857 | FALSE | 0.930368 | FALSE | Endothelia Venous EC   |
| AGGTGTT db/db1  | db/db | 3185 | 0.041154 | FALSE | 1.173448 | FALSE | Photoreceptor          |
| AGGTGTT db/db1  | db/db | 1199 | 0.057037 | FALSE | 1.630025 | FALSE | Photoreceptor          |
| AGGTGTT db/db1  | db/db | 8171 | 0.015581 | FALSE | 0.378788 | FALSE | Photoreceptor          |
| AGGTTAC db/db1  | db/db | 3421 | 0.042704 | FALSE | 1.396022 | FALSE | Endothelia Capillary E |
| AGGTTAC db/db1  | db/db | 971  | 0.029266 | FALSE | 0.832772 | FALSE | Photoreceptor          |
| AGGTTAC db/db1  | db/db | 2219 | 0.106408 | TRUE  | 2.998819 | FALSE |                        |
| AGGTTAC db/db1  | db/db | 752  | 0.024971 | FALSE | 3.230222 | FALSE | Neuron                 |
| AGGTTACC db/db1 | db/db | 7999 | 0.027758 | FALSE | 0.668259 | FALSE | Photoreceptor          |
| AGGTTACC db/db1 | db/db | 2153 | 0.035586 | FALSE | 1.212757 | FALSE | Endothelia Venous EC   |
| AGGTTACC db/db1 | db/db | 2717 | 0.015287 | FALSE | 1.072455 | FALSE | Endothelia Venous EC   |
| AGGTTACT db/db1 | db/db | 977  | 0.112477 | TRUE  | 1.116539 | FALSE |                        |
| AGGTTACT db/db1 | db/db | 925  | 0.04192  | FALSE | 1.560791 | FALSE | Photoreceptor          |
| AGGTTACT db/db1 | db/db | 469  | 0.034954 | FALSE | 2.807923 | FALSE | Photoreceptor          |
| AGGTTACT db/db1 | db/db | 402  | 0.088776 | FALSE | 3.503083 | FALSE | Endothelia Capillary E |
| AGGTTACT db/db1 | db/db | 1638 | 0.023682 | FALSE | 1.132199 | FALSE | Endothelia Capillary E |
| AGGTTACT db/db1 | db/db | 1082 | 0.054795 | FALSE | 1.147518 | FALSE | Photoreceptor          |
| AGGTTACT db/db1 | db/db | 2173 | 0.024971 | FALSE | 0.440805 | FALSE | Photoreceptor          |
| AGGTTACT db/db1 | db/db | 1515 | 0.031411 | FALSE | 1.221164 | FALSE | Photoreceptor          |
| AGGTTGT db/db1  | db/db | 3810 | 0.009277 | FALSE | 0.874144 | FALSE | Endothelia Venous EC   |
| AGGTTGT db/db1  | db/db | 3727 | 0.048732 | FALSE | 0.925214 | FALSE | Photoreceptor          |
| AGGTTGT db/db1  | db/db | 1744 | 0.018088 | FALSE | 1.307121 | FALSE | Endothelia Capillary E |
| AGGTTGT db/db1  | db/db | 1932 | 0.065957 | FALSE | 0.952579 | FALSE | Photoreceptor          |
| AGGTTGT db/db1  | db/db | 1320 | 0.023682 | FALSE | 1.530165 | FALSE | Endothelia Capillary E |
| AGGTTGT db/db1  | db/db | 906  | 0.027273 | FALSE | 0.718535 | FALSE | Photoreceptor          |
| AGGTTGT db/db1  | db/db | 443  | 0.003803 | FALSE | 2.299628 | FALSE | Pericyte               |
| AGGTTGT db/db1  | db/db | 827  | 0.05065  | FALSE | 1.241627 | FALSE | Microglia              |
| AGTAACC db/db1  | db/db | 402  | 0.018422 | FALSE | 3.021448 | FALSE | Endothelia Capillary E |
| AGTAACC db/db1  | db/db | 6410 | 0.022455 | FALSE | 0.60714  | FALSE | Photoreceptor          |
| AGTAACC db/db1  | db/db | 4264 | 0.020536 | FALSE | 0.664033 | FALSE | Photoreceptor          |
| AGTAACCT db/db1 | db/db | 486  | 0.018761 | FALSE | 1.436284 | FALSE | Photoreceptor          |

|                 |       |      |          |       |          |       |                        |
|-----------------|-------|------|----------|-------|----------|-------|------------------------|
| AGTAACCT db/db1 | db/db | 1490 | 0.007833 | FALSE | 1.174629 | FALSE | Neuron                 |
| AGTACCA db/db1  | db/db | 1560 | 0.075259 | FALSE | 1.805099 | FALSE | Endothelia Capillary E |
| AGTACCA db/db1  | db/db | 634  | 0.009712 | FALSE | 1.901665 | FALSE | Endothelia Capillary E |
| AGTACCA db/db1  | db/db | 1909 | 0.076994 | FALSE | 1.506422 | FALSE | Neuron                 |
| AGTACCA db/db1  | db/db | 2448 | 0.031973 | FALSE | 1.004118 | FALSE | Endothelia Capillary E |
| AGTACCA db/db1  | db/db | 4113 | 0.060641 | FALSE | 0.744219 | FALSE | Endothelia EC-C4       |
| AGTACCA db/db1  | db/db | 408  | 0.024105 | FALSE | 1.194212 | FALSE | Photoreceptor          |
| AGTACCA db/db1  | db/db | 835  | 0.103732 | TRUE  | 2.362869 | FALSE |                        |
| AGTACCA db/db1  | db/db | 919  | 0.107669 | TRUE  | 1.497883 | FALSE |                        |
| AGTACCA db/db1  | db/db | 1926 | 0.021669 | FALSE | 0.98407  | FALSE | Endothelia Capillary E |
| AGTACCA db/db1  | db/db | 2020 | 0.047807 | FALSE | 1.352244 | FALSE | Photoreceptor          |
| AGTACCA db/db1  | db/db | 446  | 0.046906 | FALSE | 1.82194  | FALSE | Muller cell            |
| AGTACCA db/db1  | db/db | 3596 | 0.033726 | FALSE | 0.996614 | FALSE | Endothelia Capillary E |
| AGTACCA db/db1  | db/db | 5031 | 0.028754 | FALSE | 0.694095 | FALSE | Photoreceptor          |
| AGTACTG db/db1  | db/db | 7570 | 0.016181 | FALSE | 0.356219 | FALSE | Photoreceptor          |
| AGTACTG db/db1  | db/db | 3330 | 0.013338 | FALSE | 1.151841 | FALSE | Photoreceptor          |
| AGTACTG db/db1  | db/db | 2553 | 0.012052 | FALSE | 1.07913  | FALSE | Endothelia Aterial EC  |
| AGTAGCT db/db1  | db/db | 2936 | 0.022455 | FALSE | 0.928198 | FALSE | Endothelia EC-C4       |
| AGTAGCT db/db1  | db/db | 3085 | 0.126958 | TRUE  | 1.963837 | FALSE |                        |
| AGTAGCT db/db1  | db/db | 435  | 0.039671 | FALSE | 7.433628 | TRUE  |                        |
| AGTAGCT db/db1  | db/db | 9028 | 0.04192  | FALSE | 0.47768  | FALSE | Photoreceptor          |
| AGTAGTC db/db1  | db/db | 1615 | 0.03313  | FALSE | 1.224465 | FALSE | Endothelia Capillary E |
| AGTAGTC db/db1  | db/db | 3085 | 0.03313  | FALSE | 1.144258 | FALSE | Endothelia Venous EC   |
| AGTAGTC db/db1  | db/db | 1615 | 0.01981  | FALSE | 1.0976   | FALSE | Endothelia Capillary E |
| AGTAGTC db/db1  | db/db | 4135 | 0.025416 | FALSE | 0.629103 | FALSE | Photoreceptor          |
| AGTAGTC db/db1  | db/db | 1877 | 0.095727 | FALSE | 1.09093  | FALSE | Photoreceptor          |
| AGTAGTC db/db1  | db/db | 1853 | 0.071958 | FALSE | 1.380773 | FALSE | Photoreceptor          |
| AGTAGTC db/db1  | db/db | 4791 | 0.038953 | FALSE | 0.750346 | FALSE | Photoreceptor          |
| AGTAGTC db/db1  | db/db | 836  | 0.023682 | FALSE | 1.673554 | FALSE | Endothelia Capillary E |
| AGTAGTC db/db1  | db/db | 1304 | 0.060641 | FALSE | 1.046588 | FALSE | Endothelia Capillary E |
| AGTCAAC db/db1  | db/db | 4961 | 0.026328 | FALSE | 0.813118 | FALSE | Photoreceptor          |
| AGTCAAC db/db1  | db/db | 1321 | 0.078788 | FALSE | 0.579662 | FALSE | Photoreceptor          |
| AGTCAAC db/db1  | db/db | 1554 | 0.018088 | FALSE | 1.114396 | FALSE | Endothelia EC-C4       |
| AGTCAAC db/db1  | db/db | 7844 | 0.012814 | FALSE | 0.691181 | FALSE | Photoreceptor          |
| AGTCAAC db/db1  | db/db | 858  | 0.047807 | FALSE | 41.81818 | TRUE  |                        |
| AGTCAAC db/db1  | db/db | 1159 | 0.012303 | FALSE | 2.761243 | FALSE | Muller cell            |
| AGTCAAC db/db1  | db/db | 1195 | 0.078788 | FALSE | 1.499048 | FALSE | Photoreceptor          |
| AGTCAACT db/db1 | db/db | 8841 | 0.020171 | FALSE | 0.406255 | FALSE | Photoreceptor          |
| AGTCAACT db/db1 | db/db | 347  | 0.095727 | FALSE | 1.898583 | FALSE | Microglia              |
| AGTCACA db/db1  | db/db | 1816 | 0.103567 | TRUE  | 7.442133 | TRUE  |                        |
| AGTCACA db/db1  | db/db | 1345 | 0.061912 | FALSE | 1.68943  | FALSE | Photoreceptor          |
| AGTCACA db/db1  | db/db | 2342 | 0.022059 | FALSE | 0.621272 | FALSE | Photoreceptor          |
| AGTCACA db/db1  | db/db | 753  | 0.010384 | FALSE | 0.582623 | FALSE | Photoreceptor          |
| AGTCACA db/db1  | db/db | 427  | 0.023682 | FALSE | 2.521281 | FALSE | Photoreceptor          |
| AGTCACA db/db1  | db/db | 625  | 0.046025 | FALSE | 1.302822 | FALSE | Photoreceptor          |
| AGTCACA db/db1  | db/db | 1058 | 0.006317 | FALSE | 0.661124 | FALSE | Endothelia Capillary E |
| AGTCACAT db/db1 | db/db | 476  | 0.020908 | FALSE | 2.817873 | FALSE | Muller cell            |

|                 |       |      |          |       |          |       |                        |
|-----------------|-------|------|----------|-------|----------|-------|------------------------|
| AGTCATG/ db/db1 | db/db | 4170 | 0.025416 | FALSE | 0.994916 | FALSE | Endothelia Venous EC   |
| AGTCATG/ db/db1 | db/db | 1085 | 0.009063 | FALSE | 1.330309 | FALSE | Endothelia Capillary E |
| AGTCATG/ db/db1 | db/db | 801  | 0.08663  | FALSE | 3.452586 | FALSE | Muller cell            |
| AGTCATG/ db/db1 | db/db | 1643 | 0.025416 | FALSE | 1.013302 | FALSE | Photoreceptor          |
| AGTCATG/ db/db1 | db/db | 1209 | 0.008438 | FALSE | 1.58415  | FALSE | Photoreceptor          |
| AGTCATG/ db/db1 | db/db | 949  | 0.05065  | FALSE | 1.533641 | FALSE | Muller cell            |
| AGTCATG/ db/db1 | db/db | 1704 | 0.015287 | FALSE | 1.244369 | FALSE | Endothelia Capillary E |
| AGTCATG/ db/db1 | db/db | 1129 | 0.039671 | FALSE | 1.723524 | FALSE | Photoreceptor          |
| AGTCTCCA db/db1 | db/db | 2663 | 0.030318 | FALSE | 0.897619 | FALSE | Photoreceptor          |
| AGTCTCCA db/db1 | db/db | 9182 | 0.009933 | FALSE | 0.486627 | FALSE | Photoreceptor          |
| AGTCTCCC db/db1 | db/db | 455  | 0.029266 | FALSE | 0.689621 | FALSE | Photoreceptor          |
| AGTCTCCC db/db1 | db/db | 1479 | 0.036891 | FALSE | 1.433035 | FALSE | Endothelia Capillary E |
| AGTCTCCC db/db1 | db/db | 3936 | 0.057037 | FALSE | 0.954421 | FALSE | Endothelia Venous EC   |
| AGTCTCCC db/db1 | db/db | 4945 | 0.015287 | FALSE | 0.73879  | FALSE | Photoreceptor          |
| AGTCTCCC db/db1 | db/db | 1361 | 0.060641 | FALSE | 0.784711 | FALSE | Photoreceptor          |
| AGTCTCCT db/db1 | db/db | 1627 | 0.009493 | FALSE | 1.057034 | FALSE | Endothelia Capillary E |
| AGTGACT/ db/db1 | db/db | 673  | 0.031411 | FALSE | 2.068361 | FALSE | Muller cell            |
| AGTGACT/ db/db1 | db/db | 3061 | 0.064568 | FALSE | 0.965642 | FALSE | Endothelia Venous EC   |
| AGTGACT/ db/db1 | db/db | 809  | 0.112037 | TRUE  | 2.013423 | FALSE |                        |
| AGTGACT/ db/db1 | db/db | 8971 | 0.014429 | FALSE | 0.592282 | FALSE | Photoreceptor          |
| AGTGACT/ db/db1 | db/db | 1318 | 0.019106 | FALSE | 1.274685 | FALSE | Endothelia Aterial EC  |
| AGTGACT/ db/db1 | db/db | 4383 | 0.070386 | FALSE | 0.98419  | FALSE | Endothelia Venous EC   |
| AGTGACT/ db/db1 | db/db | 2454 | 0.017114 | FALSE | 0.830553 | FALSE | Endothelia Venous EC   |
| AGTGACT/ db/db1 | db/db | 2397 | 0.088776 | FALSE | 5.283879 | TRUE  |                        |
| AGTGATC/ db/db1 | db/db | 1133 | 0.075259 | FALSE | 7.12603  | TRUE  |                        |
| AGTGATC/ db/db1 | db/db | 2915 | 0.031973 | FALSE | 0.951445 | FALSE | Endothelia EC-C4       |
| AGTGATC/ db/db1 | db/db | 384  | 0.17103  | TRUE  | 10.1476  | TRUE  |                        |
| AGTGATC/ db/db1 | db/db | 4786 | 0.015879 | FALSE | 0.739808 | FALSE | Photoreceptor          |
| AGTGATC/ db/db1 | db/db | 944  | 0.055901 | FALSE | 2.981981 | FALSE | Muller cell            |
| AGTGATC/ db/db1 | db/db | 630  | 0.088776 | FALSE | 1.124353 | FALSE | Photoreceptor          |
| AGTGATC/ db/db1 | db/db | 2910 | 0.010157 | FALSE | 0.62358  | FALSE | Neuron                 |
| AGTGCCG/ db/db1 | db/db | 1831 | 0.020536 | FALSE | 0.594156 | FALSE | Photoreceptor          |
| AGTGCCG/ db/db1 | db/db | 4030 | 0.138889 | TRUE  | 2.048874 | FALSE |                        |
| AGTGCCG/ db/db1 | db/db | 2550 | 0.038251 | FALSE | 0.891672 | FALSE | Photoreceptor          |
| AGTGCCG/ db/db1 | db/db | 419  | 0.067388 | FALSE | 1.314326 | FALSE | Photoreceptor          |
| AGTGCCG/ db/db1 | db/db | 2148 | 0.043505 | FALSE | 1.331827 | FALSE | Endothelia Venous EC   |
| AGTGTTG/ db/db1 | db/db | 898  | 0.053718 | FALSE | 1.557233 | FALSE | Photoreceptor          |
| AGTGTTG/ db/db1 | db/db | 597  | 0.058205 | FALSE | 2.835769 | FALSE | Muller cell            |
| AGTGTTG/ db/db1 | db/db | 1616 | 0.033726 | FALSE | 0.496893 | FALSE | Photoreceptor          |
| AGTGTTG/ db/db1 | db/db | 1862 | 0.017758 | FALSE | 1.165673 | FALSE | Endothelia EC-C4       |
| AGTTAGC/ db/db1 | db/db | 976  | 0.061912 | FALSE | 1.934604 | FALSE | Neuron                 |
| AGTTAGC/ db/db1 | db/db | 2338 | 0.029787 | FALSE | 0.732715 | FALSE | Photoreceptor          |
| AGTTAGC/ db/db1 | db/db | 872  | 0.013338 | FALSE | 0.823125 | FALSE | Photoreceptor          |
| AGTTAGC/ db/db1 | db/db | 504  | 0.017434 | FALSE | 3.627499 | FALSE | Muller cell            |
| AGTTAGC/ db/db1 | db/db | 1040 | 0.038251 | FALSE | 1.11224  | FALSE | Photoreceptor          |
| AGTTAGC/ db/db1 | db/db | 667  | 0.088776 | FALSE | 2.091004 | FALSE | Photoreceptor          |
| AGTTCCCC db/db1 | db/db | 7114 | 0.019455 | FALSE | 0.557923 | FALSE | Photoreceptor          |



|                 |       |      |          |       |          |       |                        |
|-----------------|-------|------|----------|-------|----------|-------|------------------------|
| AGTTCCCC db/db1 | db/db | 1939 | 0.048732 | FALSE | 0.913879 | FALSE | Photoreceptor          |
| AGTTCCCC db/db1 | db/db | 2574 | 0.055901 | FALSE | 1.013112 | FALSE | Endothelia Venous EC   |
| AGTTCCCC db/db1 | db/db | 1148 | 0.007441 | FALSE | 1.650855 | FALSE | Endothelia Capillary E |
| AGTTCCCC db/db1 | db/db | 1255 | 0.027273 | FALSE | 1.580381 | FALSE | Endothelia EC-C4       |
| AGTTCCCC db/db1 | db/db | 1504 | 0.016488 | FALSE | 0.419101 | FALSE | Photoreceptor          |
| AGTTCCCC db/db1 | db/db | 2326 | 0.003497 | FALSE | 0.467097 | FALSE | Neuron                 |
| AGTTCCCC db/db1 | db/db | 1257 | 0.019455 | FALSE | 1.124421 | FALSE | Endothelia Capillary E |
| AGTTCCCC db/db1 | db/db | 2737 | 0.022857 | FALSE | 1.095006 | FALSE | Endothelia Capillary E |
| AGTTCCCC db/db1 | db/db | 2193 | 0.014151 | FALSE | 0.996286 | FALSE | Endothelia EC-C4       |
| AGTTCCCC db/db1 | db/db | 3480 | 0.038251 | FALSE | 0.994713 | FALSE | Endothelia Capillary E |
| AGTTCCCC db/db1 | db/db | 2962 | 0.012303 | FALSE | 1.176821 | FALSE | Endothelia Venous EC   |
| AGTTCCCT db/db1 | db/db | 6583 | 0.012052 | FALSE | 0.602759 | FALSE | Photoreceptor          |
| AGTTCCCT db/db1 | db/db | 1990 | 0.048732 | FALSE | 1.326671 | FALSE | Photoreceptor          |
| AGTTCCCT db/db1 | db/db | 3675 | 0.046025 | FALSE | 1.082427 | FALSE | Photoreceptor          |
| AGTTCGAC db/db1 | db/db | 1602 | 0.022455 | FALSE | 0.570038 | FALSE | Photoreceptor          |
| AGTTCGAC db/db1 | db/db | 703  | 0.04192  | FALSE | 2.128702 | FALSE | Photoreceptor          |
| AGTTCGAC db/db1 | db/db | 844  | 0.041154 | FALSE | 2.015231 | FALSE | Pericyte               |
| AGTTCGAC db/db1 | db/db | 1186 | 0.018422 | FALSE | 1.608564 | FALSE | Neuron                 |
| AGTTCGAC db/db1 | db/db | 2021 | 0.04192  | FALSE | 1.075117 | FALSE | Photoreceptor          |
| AGTTCGAC db/db1 | db/db | 755  | 0.039671 | FALSE | 0.893805 | FALSE | Photoreceptor          |
| ATACCGA db/db1  | db/db | 401  | 0.112477 | TRUE  | 10.97122 | TRUE  |                        |
| ATACCGA db/db1  | db/db | 1580 | 0.012303 | FALSE | 1.045759 | FALSE | Endothelia Capillary E |
| ATACCGAC db/db1 | db/db | 1924 | 0.063221 | FALSE | 1.388458 | FALSE | Pericyte               |
| ATACCGAC db/db1 | db/db | 684  | 0.010614 | FALSE | 1.377498 | FALSE | Endothelia EC-C4       |
| ATACCGAC db/db1 | db/db | 1829 | 0.017758 | FALSE | 0.387206 | FALSE | Photoreceptor          |
| ATACCGAC db/db1 | db/db | 2798 | 0.034954 | FALSE | 0.952334 | FALSE | Photoreceptor          |
| ATACCGAC db/db1 | db/db | 3822 | 0.061912 | FALSE | 0.878137 | FALSE | Photoreceptor          |
| ATACCGAC db/db1 | db/db | 4040 | 0.052669 | FALSE | 0.988205 | FALSE | Endothelia Venous EC   |
| ATACCGAT db/db1 | db/db | 1577 | 0.051646 | FALSE | 0.610271 | FALSE | Photoreceptor          |
| ATACCGAT db/db1 | db/db | 1295 | 0.016488 | FALSE | 1.350559 | FALSE | Endothelia Capillary E |
| ATACCTTA db/db1 | db/db | 3617 | 0.026328 | FALSE | 0.780851 | FALSE | Endothelia Venous EC   |
| ATACCTTA db/db1 | db/db | 1106 | 0.013074 | FALSE | 1.169924 | FALSE | Endothelia Capillary E |
| ATACCTTG db/db1 | db/db | 1526 | 0.076994 | FALSE | 1.942478 | FALSE | Pericyte               |
| ATACCTTT db/db1 | db/db | 562  | 0.028251 | FALSE | 0.782792 | FALSE | Photoreceptor          |
| ATACCTTT db/db1 | db/db | 2787 | 0.014151 | FALSE | 1.047396 | FALSE | Endothelia Capillary E |
| ATACCTTT db/db1 | db/db | 1179 | 0.023682 | FALSE | 3.88032  | FALSE | Muller cell            |
| ATACTTCA db/db1 | db/db | 1726 | 0.15354  | TRUE  | 5.738234 | TRUE  |                        |
| ATACTTCC db/db1 | db/db | 1054 | 0.10565  | TRUE  | 2.924528 | FALSE |                        |
| ATACTTCC db/db1 | db/db | 1057 | 0.045165 | FALSE | 1.384912 | FALSE | Photoreceptor          |
| ATACTTCC db/db1 | db/db | 688  | 0.059406 | FALSE | 1.949028 | FALSE | Photoreceptor          |
| ATACTTCC db/db1 | db/db | 2730 | 0.009063 | FALSE | 1.065629 | FALSE | Neuron                 |
| ATACTTCG db/db1 | db/db | 764  | 0.126437 | TRUE  | 9.035621 | TRUE  |                        |
| ATACTTCG db/db1 | db/db | 776  | 0.029787 | FALSE | 1.932115 | FALSE | Muller cell            |
| ATACTTCG db/db1 | db/db | 681  | 0.042704 | FALSE | 1.432469 | FALSE | Photoreceptor          |
| ATACTTCG db/db1 | db/db | 423  | 0.025416 | FALSE | 1.687997 | FALSE | Photoreceptor          |
| ATACTTCG db/db1 | db/db | 496  | 0.018761 | FALSE | 0.632505 | FALSE | Photoreceptor          |
| ATACTTCG db/db1 | db/db | 4407 | 0.228861 | TRUE  | 1.447246 | FALSE |                        |

|          |        |       |      |          |       |          |       |                        |
|----------|--------|-------|------|----------|-------|----------|-------|------------------------|
| ATACTTCT | db/db1 | db/db | 1103 | 0.042704 | FALSE | 1.08167  | FALSE | Endothelia EC-C4       |
| ATACTTCT | db/db1 | db/db | 786  | 0.019106 | FALSE | 0.393089 | FALSE | Photoreceptor          |
| ATAGACCA | db/db1 | db/db | 6665 | 0.045165 | FALSE | 0.811656 | FALSE | Photoreceptor          |
| ATAGACCC | db/db1 | db/db | 3787 | 0.017758 | FALSE | 1.045827 | FALSE | Photoreceptor          |
| ATAGACCC | db/db1 | db/db | 756  | 0.053718 | FALSE | 1.517417 | FALSE | Photoreceptor          |
| ATAGACCT | db/db1 | db/db | 3903 | 0.021669 | FALSE | 0.944644 | FALSE | Photoreceptor          |
| ATAGACCT | db/db1 | db/db | 4164 | 0.018761 | FALSE | 0.887411 | FALSE | Endothelia Venous EC   |
| ATAGACCT | db/db1 | db/db | 3821 | 0.017114 | FALSE | 0.477572 | FALSE | Photoreceptor          |
| ATAGAGA  | db/db1 | db/db | 4601 | 0.058205 | FALSE | 0.83321  | FALSE | Endothelia Venous EC   |
| ATAGAGA  | db/db1 | db/db | 6611 | 0.019455 | FALSE | 0.759562 | FALSE | Photoreceptor          |
| ATAGAGA  | db/db1 | db/db | 3507 | 0.022059 | FALSE | 0.924217 | FALSE | Endothelia EC-C4       |
| ATAGAGA  | db/db1 | db/db | 749  | 0.068864 | FALSE | 0.819989 | FALSE | Photoreceptor          |
| ATAGAGA  | db/db1 | db/db | 913  | 0.017114 | FALSE | 1.878252 | FALSE | Endothelia Capillary E |
| ATAGAGA  | db/db1 | db/db | 449  | 0.013074 | FALSE | 0.209524 | FALSE | Photoreceptor          |
| ATAGGCT  | db/db1 | db/db | 6699 | 0.030859 | FALSE | 0.809973 | FALSE | Photoreceptor          |
| ATAGGCT  | db/db1 | db/db | 8605 | 0.018088 | FALSE | 0.345361 | FALSE | Photoreceptor          |
| ATAGGCT  | db/db1 | db/db | 1773 | 0.031973 | FALSE | 1.339993 | FALSE | Endothelia Capillary E |
| ATAGGCT  | db/db1 | db/db | 7536 | 0.021286 | FALSE | 0.618452 | FALSE | Photoreceptor          |
| ATAGGCT  | db/db1 | db/db | 3300 | 0.031973 | FALSE | 0.731856 | FALSE | Photoreceptor          |
| ATAGGCT  | db/db1 | db/db | 4348 | 0.016488 | FALSE | 0.685345 | FALSE | Photoreceptor          |
| ATAGGCT  | db/db1 | db/db | 8764 | 0.334395 | TRUE  | 1.093249 | FALSE |                        |
| ATATCCTA | db/db1 | db/db | 3276 | 0.026328 | FALSE | 1.083318 | FALSE | Endothelia Capillary E |
| ATATCCTA | db/db1 | db/db | 2209 | 0.033726 | FALSE | 1.115416 | FALSE | Endothelia Capillary E |
| ATATCCTC | db/db1 | db/db | 1544 | 0.014429 | FALSE | 0.748304 | FALSE | Endothelia Capillary E |
| ATATCCTG | db/db1 | db/db | 1351 | 0.016799 | FALSE | 1.256184 | FALSE | Photoreceptor          |
| ATATCCTT | db/db1 | db/db | 2501 | 0.039671 | FALSE | 0.511938 | FALSE | Microglia              |
| ATATCCTT | db/db1 | db/db | 3998 | 0.053718 | FALSE | 0.890606 | FALSE | Photoreceptor          |
| ATCACAG  | db/db1 | db/db | 740  | 0.100845 | TRUE  | 1.16764  | FALSE |                        |
| ATCACAG  | db/db1 | db/db | 2457 | 0.046906 | FALSE | 1.313616 | FALSE | Photoreceptor          |
| ATCACAG  | db/db1 | db/db | 2973 | 0.04192  | FALSE | 0.818963 | FALSE | Endothelia Capillary E |
| ATCACAGT | db/db1 | db/db | 4314 | 0.031411 | FALSE | 0.899655 | FALSE | Photoreceptor          |
| ATCACAGT | db/db1 | db/db | 460  | 0.011805 | FALSE | 2.132981 | FALSE | Endothelia Capillary E |
| ATCACGA  | db/db1 | db/db | 1044 | 0.061912 | FALSE | 2.199843 | FALSE | Photoreceptor          |
| ATCACGA  | db/db1 | db/db | 7520 | 0.014429 | FALSE | 0.50762  | FALSE | Photoreceptor          |
| ATCACGA  | db/db1 | db/db | 1779 | 0.133788 | TRUE  | 0.810537 | FALSE |                        |
| ATCACGA  | db/db1 | db/db | 363  | 0.103732 | TRUE  | 0.562181 | FALSE |                        |
| ATCACGA  | db/db1 | db/db | 553  | 0.093319 | FALSE | 1.103213 | FALSE | Photoreceptor          |
| ATCACGAT | db/db1 | db/db | 6943 | 0.018422 | FALSE | 0.769227 | FALSE | Photoreceptor          |
| ATCACGAT | db/db1 | db/db | 1168 | 0.013338 | FALSE | 1.349249 | FALSE | Endothelia Capillary E |
| ATCACTTA | db/db1 | db/db | 927  | 0.045165 | FALSE | 0.99463  | FALSE | Photoreceptor          |
| ATCACTTC | db/db1 | db/db | 693  | 0.017434 | FALSE | 1.70037  | FALSE | Endothelia Capillary E |
| ATCACTTC | db/db1 | db/db | 6486 | 0.014711 | FALSE | 0.526129 | FALSE | Photoreceptor          |
| ATCACTTC | db/db1 | db/db | 2979 | 0.03313  | FALSE | 0.939165 | FALSE | Photoreceptor          |
| ATCACTTG | db/db1 | db/db | 898  | 0.064568 | FALSE | 1.516943 | FALSE | Endothelia Capillary E |
| ATCACTTG | db/db1 | db/db | 881  | 0.119568 | TRUE  | 3.804348 | FALSE |                        |
| ATCACTTG | db/db1 | db/db | 438  | 0.036232 | FALSE | 2.301853 | FALSE | Photoreceptor          |
| ATCACTTG | db/db1 | db/db | 2379 | 0.030318 | FALSE | 1.340632 | FALSE | Neuron                 |

|          |        |       |      |          |       |          |       |                        |
|----------|--------|-------|------|----------|-------|----------|-------|------------------------|
| ATCACTTT | db/db1 | db/db | 2726 | 0.012052 | FALSE | 0.785899 | FALSE | Photoreceptor          |
| ATCAGGT  | db/db1 | db/db | 856  | 0.034334 | FALSE | 1.828517 | FALSE | Endothelia Venous EC   |
| ATCAGGT  | db/db1 | db/db | 895  | 0.030318 | FALSE | 1.204796 | FALSE | Photoreceptor          |
| ATCAGGT  | db/db1 | db/db | 871  | 0.03313  | FALSE | 0.814772 | FALSE | Photoreceptor          |
| ATCAGGT  | db/db1 | db/db | 4825 | 0.031973 | FALSE | 0.664319 | FALSE | Photoreceptor          |
| ATCAGGT  | db/db1 | db/db | 704  | 0.063221 | FALSE | 1.576617 | FALSE | Photoreceptor          |
| ATCAGGT  | db/db1 | db/db | 470  | 0.093319 | FALSE | 1.567862 | FALSE | Photoreceptor          |
| ATCATTCA | db/db1 | db/db | 2437 | 0.038953 | FALSE | 1.361918 | FALSE | Neuron                 |
| ATCATTCT | db/db1 | db/db | 1364 | 0.057037 | FALSE | 1.518217 | FALSE | Pericyte               |
| ATCCACCA | db/db1 | db/db | 873  | 0.020908 | FALSE | 1.89955  | FALSE | Endothelia Capillary E |
| ATCCACCA | db/db1 | db/db | 472  | 0.070386 | FALSE | 2.949956 | FALSE | Photoreceptor          |
| ATCCACCA | db/db1 | db/db | 4296 | 0.048732 | FALSE | 0.949396 | FALSE | Photoreceptor          |
| ATCCACCA | db/db1 | db/db | 4426 | 0.184701 | TRUE  | 0.809207 | FALSE |                        |
| ATCCACCC | db/db1 | db/db | 3184 | 0.067388 | FALSE | 0.856899 | FALSE | Photoreceptor          |
| ATCCACCG | db/db1 | db/db | 2327 | 0.008644 | FALSE | 1.365895 | FALSE | Photoreceptor          |
| ATCCACCG | db/db1 | db/db | 2228 | 0.012303 | FALSE | 0.297629 | FALSE | Photoreceptor          |
| ATCCACCT | db/db1 | db/db | 1081 | 0.485327 | TRUE  | 3.263547 | FALSE |                        |
| ATCCACCT | db/db1 | db/db | 3546 | 0.445833 | TRUE  | 1.873476 | FALSE |                        |
| ATCCACCT | db/db1 | db/db | 387  | 0.031411 | FALSE | 3.953951 | FALSE | Muller cell            |
| ATCCATTC | db/db1 | db/db | 2912 | 0.055901 | FALSE | 1.061558 | FALSE | Endothelia EC-C4       |
| ATCCATTC | db/db1 | db/db | 4060 | 0.018088 | FALSE | 0.620116 | FALSE | Photoreceptor          |
| ATCCATTC | db/db1 | db/db | 414  | 0.014997 | FALSE | 0.800006 | FALSE | Photoreceptor          |
| ATCCATTC | db/db1 | db/db | 806  | 0.013605 | FALSE | 4.19715  | FALSE | Muller cell            |
| ATCCATTC | db/db1 | db/db | 380  | 0.011805 | FALSE | 3.264042 | FALSE | Photoreceptor          |
| ATCCATTG | db/db1 | db/db | 4567 | 0.030318 | FALSE | 0.792124 | FALSE | Photoreceptor          |
| ATCCATTG | db/db1 | db/db | 1826 | 0.003803 | FALSE | 0.826221 | FALSE | Neuron                 |
| ATCCATTT | db/db1 | db/db | 1712 | 0.075259 | FALSE | 0.857113 | FALSE | Photoreceptor          |
| ATCCATTT | db/db1 | db/db | 3827 | 0.029787 | FALSE | 1.087402 | FALSE | Photoreceptor          |
| ATCCATTT | db/db1 | db/db | 3120 | 0.015581 | FALSE | 0.961252 | FALSE | Endothelia EC-C4       |
| ATCCCTGG | db/db1 | db/db | 3773 | 0.055901 | FALSE | 1.023654 | FALSE | Photoreceptor          |
| ATCCCTGG | db/db1 | db/db | 2305 | 0.027758 | FALSE | 0.973655 | FALSE | Neuron                 |
| ATCCCTGG | db/db1 | db/db | 638  | 0.084562 | FALSE | 3.170062 | FALSE | Pericyte               |
| ATCCCTGT | db/db1 | db/db | 735  | 0.039671 | FALSE | 2.861103 | FALSE | Muller cell            |
| ATCCCTGT | db/db1 | db/db | 2356 | 0.025416 | FALSE | 1.347281 | FALSE | Neuron                 |
| ATCCGTCA | db/db1 | db/db | 6534 | 0.016488 | FALSE | 0.497148 | FALSE | Photoreceptor          |
| ATCCGTCA | db/db1 | db/db | 1617 | 0.058205 | FALSE | 5.087782 | TRUE  |                        |
| ATCCGTCC | db/db1 | db/db | 1524 | 0.030318 | FALSE | 1.651508 | FALSE | Pericyte               |
| ATCCGTCT | db/db1 | db/db | 5065 | 0.037564 | FALSE | 0.804764 | FALSE | Endothelia Venous EC   |
| ATCCGTCT | db/db1 | db/db | 547  | 0.095727 | FALSE | 9.230769 | TRUE  |                        |
| ATCCGTCT | db/db1 | db/db | 941  | 0.027758 | FALSE | 1.752981 | FALSE | Photoreceptor          |
| ATCCTATA | db/db1 | db/db | 1976 | 0.025868 | FALSE | 1.098484 | FALSE | Endothelia Capillary E |
| ATCCTATA | db/db1 | db/db | 2074 | 0.045165 | FALSE | 0.997215 | FALSE | Photoreceptor          |
| ATCCTATC | db/db1 | db/db | 1449 | 0.028251 | FALSE | 1.41443  | FALSE | Endothelia Venous EC   |
| ATCCTATC | db/db1 | db/db | 4229 | 0.042704 | FALSE | 0.866377 | FALSE | Photoreceptor          |
| ATCCTATC | db/db1 | db/db | 2739 | 0.014711 | FALSE | 1.002171 | FALSE | Endothelia Venous EC   |
| ATCCTATG | db/db1 | db/db | 655  | 0.058205 | FALSE | 1.685888 | FALSE | Photoreceptor          |
| ATCGATG  | db/db1 | db/db | 982  | 0.018088 | FALSE | 1.810265 | FALSE | Pericyte               |

|                 |       |      |          |       |          |       |                        |
|-----------------|-------|------|----------|-------|----------|-------|------------------------|
| ATCGATG/ db/db1 | db/db | 1081 | 0.006317 | FALSE | 0.348931 | FALSE | Endothelia Capillary E |
| ATCGATG/ db/db1 | db/db | 3529 | 0.053718 | FALSE | 1.217014 | FALSE | Photoreceptor          |
| ATCGATG/ db/db1 | db/db | 8330 | 0.070386 | FALSE | 0.566628 | FALSE | Photoreceptor          |
| ATCGATG( db/db1 | db/db | 1120 | 0.019106 | FALSE | 1.200894 | FALSE | Endothelia Capillary E |
| ATCGATG( db/db1 | db/db | 2130 | 0.045165 | FALSE | 1.354453 | FALSE | Endothelia Capillary E |
| ATCGATG  db/db1 | db/db | 4399 | 0.028754 | FALSE | 0.864271 | FALSE | Photoreceptor          |
| ATCGATG  db/db1 | db/db | 1391 | 0.010846 | FALSE | 1.020035 | FALSE | Endothelia Capillary E |
| ATCGCCTA db/db1 | db/db | 1751 | 0.006683 | FALSE | 1.148178 | FALSE | Endothelia Capillary E |
| ATCGCCTA db/db1 | db/db | 2788 | 0.051646 | FALSE | 1.2078   | FALSE | Endothelia EC-C4       |
| ATCGCCTA db/db1 | db/db | 2854 | 0.045165 | FALSE | 1.158523 | FALSE | Photoreceptor          |
| ATCGCCTC db/db1 | db/db | 1089 | 0.118221 | TRUE  | 1.79606  | FALSE |                        |
| ATCGCCTC db/db1 | db/db | 2791 | 0.020908 | FALSE | 0.33396  | FALSE | Photoreceptor          |
| ATCGCCTC db/db1 | db/db | 442  | 0.15354  | TRUE  | 8.05153  | TRUE  |                        |
| ATCGCCTC db/db1 | db/db | 965  | 0.022455 | FALSE | 1.322547 | FALSE | Endothelia Venous EC   |
| ATCGCCTC db/db1 | db/db | 762  | 0.010614 | FALSE | 0.454049 | FALSE | Photoreceptor          |
| ATCGCCTC db/db1 | db/db | 8153 | 0.044326 | FALSE | 0.391863 | FALSE | Photoreceptor          |
| ATCGCCTC db/db1 | db/db | 1601 | 0.018761 | FALSE | 1.402515 | FALSE | Endothelia Capillary E |
| ATCGGAT/ db/db1 | db/db | 4424 | 0.059406 | FALSE | 0.895718 | FALSE | Photoreceptor          |
| ATCGGAT/ db/db1 | db/db | 2556 | 0.015879 | FALSE | 1.149906 | FALSE | Endothelia Capillary E |
| ATCGGAT( db/db1 | db/db | 2220 | 0.044326 | FALSE | 1.231546 | FALSE | Photoreceptor          |
| ATCGGAT( db/db1 | db/db | 6355 | 0.025416 | FALSE | 0.641643 | FALSE | Photoreceptor          |
| ATCGGAT( db/db1 | db/db | 504  | 0.046906 | FALSE | 4.301683 | FALSE | Muller cell            |
| ATCGGAT( db/db1 | db/db | 3096 | 0.041154 | FALSE | 1.081843 | FALSE | Photoreceptor          |
| ATCGGAT( db/db1 | db/db | 3622 | 0.017434 | FALSE | 0.636416 | FALSE | Photoreceptor          |
| ATCGGAT( db/db1 | db/db | 1082 | 0.027758 | FALSE | 0.918824 | FALSE | Photoreceptor          |
| ATCGGAT  db/db1 | db/db | 537  | 0.055901 | FALSE | 2.005086 | FALSE | Photoreceptor          |
| ATCGGAT  db/db1 | db/db | 8202 | 0.078788 | FALSE | 0.457531 | FALSE | Photoreceptor          |
| ATCGGCG/ db/db1 | db/db | 1381 | 0.013876 | FALSE | 1.997262 | FALSE | Endothelia EC-C4       |
| ATCGGCG/ db/db1 | db/db | 2896 | 0.047807 | FALSE | 1.769222 | FALSE | Photoreceptor          |
| ATCGGCG( db/db1 | db/db | 594  | 0.24     | TRUE  | 19.49891 | TRUE  |                        |
| ATCGGCG  db/db1 | db/db | 384  | 0.088776 | FALSE | 2.554596 | FALSE | Endothelia Capillary E |
| ATCGGCG  db/db1 | db/db | 876  | 0.054795 | FALSE | 0.727017 | FALSE | Photoreceptor          |
| ATCGTAG/ db/db1 | db/db | 5044 | 0.023266 | FALSE | 0.701002 | FALSE | Photoreceptor          |
| ATCGTAG( db/db1 | db/db | 1029 | 0.058205 | FALSE | 1.977966 | FALSE | Photoreceptor          |
| ATCGTAG( db/db1 | db/db | 505  | 0.036891 | FALSE | 3.124981 | FALSE | Muller cell            |
| ATCGTAG( db/db1 | db/db | 633  | 0.108505 | TRUE  | 2.811736 | FALSE |                        |
| ATCGTAG( db/db1 | db/db | 729  | 0.034954 | FALSE | 1.205173 | FALSE | Photoreceptor          |
| ATCGTAG  db/db1 | db/db | 2717 | 0.027758 | FALSE | 1.179514 | FALSE | Endothelia Capillary E |
| ATCGTAG  db/db1 | db/db | 1455 | 0.015581 | FALSE | 1.235324 | FALSE | Endothelia Capillary E |
| ATCGTAG  db/db1 | db/db | 1812 | 0.115723 | TRUE  | 1.674837 | FALSE |                        |
| ATCGTCCA db/db1 | db/db | 1077 | 0.073582 | FALSE | 10.76257 | TRUE  |                        |
| ATCGTCCA db/db1 | db/db | 620  | 0.022455 | FALSE | 0.760206 | FALSE | Photoreceptor          |
| ATCGTCCC db/db1 | db/db | 643  | 0.014997 | FALSE | 2.28981  | FALSE | Endothelia Capillary E |
| ATCGTCCC db/db1 | db/db | 4024 | 0.038251 | FALSE | 0.576041 | FALSE | Photoreceptor          |
| ATCGTCCC db/db1 | db/db | 860  | 0.075259 | FALSE | 2.53621  | FALSE | Muller cell            |
| ATCGTCCC db/db1 | db/db | 5466 | 0.126437 | TRUE  | 1.592653 | FALSE |                        |
| ATCGTCCC db/db1 | db/db | 5944 | 0.036232 | FALSE | 0.906787 | FALSE | Endothelia Capillary E |

|                 |       |      |          |       |          |       |                        |
|-----------------|-------|------|----------|-------|----------|-------|------------------------|
| ATCGTCCC db/db1 | db/db | 5104 | 0.042704 | FALSE | 0.889889 | FALSE | Photoreceptor          |
| ATCGTCCC db/db1 | db/db | 6928 | 0.023266 | FALSE | 0.526709 | FALSE | Photoreceptor          |
| ATCGTCCC db/db1 | db/db | 887  | 0.052669 | FALSE | 3.712063 | FALSE | Muller cell            |
| ATCGTCCT db/db1 | db/db | 8284 | 0.028754 | FALSE | 0.711637 | FALSE | Photoreceptor          |
| ATCGTCCT db/db1 | db/db | 6258 | 0.064568 | FALSE | 0.855818 | FALSE | Photoreceptor          |
| ATCGTGA db/db1  | db/db | 1763 | 0.015287 | FALSE | 1.024656 | FALSE | Endothelia Capillary E |
| ATCGTGAC db/db1 | db/db | 1407 | 0.064568 | FALSE | 1.502474 | FALSE | Endothelia Capillary E |
| ATCGTGAC db/db1 | db/db | 5460 | 0.035586 | FALSE | 0.712016 | FALSE | Photoreceptor          |
| ATCGTGAC db/db1 | db/db | 591  | 0.080645 | FALSE | 2.705587 | FALSE | Endothelia Capillary E |
| ATCGTGAC db/db1 | db/db | 476  | 0.037564 | FALSE | 0.597725 | FALSE | Neuron                 |
| ATCGTGAT db/db1 | db/db | 1459 | 0.070386 | FALSE | 1.829091 | FALSE | Endothelia Capillary E |
| ATCGTGAT db/db1 | db/db | 1531 | 0.103567 | TRUE  | 3.07571  | FALSE |                        |
| ATCGTGAT db/db1 | db/db | 1335 | 0.007833 | FALSE | 1.442328 | FALSE | Endothelia Capillary E |
| ATCGTGAT db/db1 | db/db | 3878 | 0.382671 | TRUE  | 1.722132 | FALSE |                        |
| ATCGTGAT db/db1 | db/db | 2689 | 0.024534 | FALSE | 1.207897 | FALSE | Endothelia Venous EC   |
| ATCTCTAA db/db1 | db/db | 3488 | 0.026328 | FALSE | 0.843045 | FALSE | Endothelia EC-C4       |
| ATCTCTAC db/db1 | db/db | 535  | 0.025416 | FALSE | 2.132143 | FALSE | Muller cell            |
| ATCTCTAC db/db1 | db/db | 547  | 0.036891 | FALSE | 0.66349  | FALSE | Pericyte               |
| ATCTCTAC db/db1 | db/db | 3655 | 0.138889 | TRUE  | 2.441891 | FALSE |                        |
| ATCTCTAC db/db1 | db/db | 1832 | 0.153234 | TRUE  | 2.801462 | FALSE |                        |
| ATCTCTAG db/db1 | db/db | 907  | 0.064568 | FALSE | 2.012669 | FALSE | Photoreceptor          |
| ATCTCTAG db/db1 | db/db | 5959 | 0.028251 | FALSE | 0.809047 | FALSE | Photoreceptor          |
| ATCTCTAG db/db1 | db/db | 4738 | 0.036891 | FALSE | 0.76602  | FALSE | Photoreceptor          |
| ATCTCTAT db/db1 | db/db | 3211 | 0.015581 | FALSE | 0.665783 | FALSE | Photoreceptor          |
| ATCTCTAT db/db1 | db/db | 1852 | 0.026796 | FALSE | 1.49873  | FALSE | Endothelia Capillary E |
| ATCTCTAT db/db1 | db/db | 8914 | 0.016181 | FALSE | 0.479842 | FALSE | Photoreceptor          |
| ATCTTCAC db/db1 | db/db | 2234 | 0.038953 | FALSE | 0.715584 | FALSE | Photoreceptor          |
| ATCTTCAC db/db1 | db/db | 1540 | 0.031411 | FALSE | 0.506699 | FALSE | Photoreceptor          |
| ATCTTCAC db/db1 | db/db | 323  | 0.025868 | FALSE | 2.015612 | FALSE | Microglia              |
| ATCTTCAC db/db1 | db/db | 7413 | 0.112477 | TRUE  | 1.654319 | FALSE |                        |
| ATCTTCAC db/db1 | db/db | 1146 | 0.041154 | FALSE | 3.022582 | FALSE | Muller cell            |
| ATCTTCAG db/db1 | db/db | 5240 | 0.148319 | TRUE  | 1.727291 | FALSE |                        |
| ATCTTCAG db/db1 | db/db | 2412 | 0.065957 | FALSE | 1.066937 | FALSE | Photoreceptor          |
| ATCTTCAG db/db1 | db/db | 2655 | 0.020908 | FALSE | 0.677918 | FALSE | Neuron                 |
| ATCTTCAG db/db1 | db/db | 6158 | 0.024105 | FALSE | 0.746354 | FALSE | Photoreceptor          |
| ATCTTCAT db/db1 | db/db | 997  | 0.047807 | FALSE | 1.949807 | FALSE | Microglia              |
| ATGAAAG db/db1  | db/db | 743  | 0.051646 | FALSE | 1.385231 | FALSE | Photoreceptor          |
| ATGAAAG db/db1  | db/db | 2290 | 0.006317 | FALSE | 0.971954 | FALSE | Endothelia EC-C4       |
| ATGAAAG db/db1  | db/db | 1511 | 0.100845 | TRUE  | 2.462845 | FALSE |                        |
| ATGAAAG db/db1  | db/db | 8141 | 0.020908 | FALSE | 0.592689 | FALSE | Photoreceptor          |
| ATGAAAG db/db1  | db/db | 3913 | 0.022455 | FALSE | 0.874109 | FALSE | Endothelia Venous EC   |
| ATGACCA db/db1  | db/db | 5440 | 0.036891 | FALSE | 0.915256 | FALSE | Photoreceptor          |
| ATGACCA db/db1  | db/db | 1558 | 0.027273 | FALSE | 3.215483 | FALSE | Muller cell            |
| ATGACCAC db/db1 | db/db | 686  | 0.039671 | FALSE | 2.783674 | FALSE | Photoreceptor          |
| ATGACCAC db/db1 | db/db | 2435 | 0.004116 | FALSE | 1.085706 | FALSE | Neuron                 |
| ATGACCAC db/db1 | db/db | 671  | 0.015879 | FALSE | 0.414209 | FALSE | Photoreceptor          |
| ATGACCAC db/db1 | db/db | 3664 | 0.018761 | FALSE | 0.860904 | FALSE | Photoreceptor          |

|          |        |       |      |          |       |          |       |                        |
|----------|--------|-------|------|----------|-------|----------|-------|------------------------|
| ATGACCA  | db/db1 | db/db | 2662 | 0.014151 | FALSE | 0.806929 | FALSE | Endothelia Venous EC   |
| ATGACCA  | db/db1 | db/db | 1778 | 0.120957 | TRUE  | 1.491086 | FALSE |                        |
| ATGACCA  | db/db1 | db/db | 1365 | 0.064568 | FALSE | 0.724274 | FALSE | Photoreceptor          |
| ATGACCA  | db/db1 | db/db | 1394 | 0.130259 | TRUE  | 4.835997 | FALSE |                        |
| ATGAGGG  | db/db1 | db/db | 2182 | 0.122691 | TRUE  | 6.129477 | TRUE  |                        |
| ATGAGGG  | db/db1 | db/db | 599  | 0.005782 | FALSE | 2.324798 | FALSE | Photoreceptor          |
| ATGAGGG  | db/db1 | db/db | 2399 | 0.055901 | FALSE | 0.926363 | FALSE | Photoreceptor          |
| ATGAGGG  | db/db1 | db/db | 3456 | 0.047807 | FALSE | 1.076073 | FALSE | Endothelia Venous EC   |
| ATGAGGG  | db/db1 | db/db | 2373 | 0.064568 | FALSE | 1.264057 | FALSE | Photoreceptor          |
| ATGAGGG  | db/db1 | db/db | 1084 | 0.098234 | FALSE | 1.809122 | FALSE | Muller cell            |
| ATGAGGG  | db/db1 | db/db | 1731 | 0.070386 | FALSE | 1.72401  | FALSE | Endothelia Capillary E |
| ATGAGGG  | db/db1 | db/db | 3431 | 0.015287 | FALSE | 1.056489 | FALSE | Endothelia EC-C4       |
| ATGAGGG  | db/db1 | db/db | 835  | 0.022857 | FALSE | 1.432238 | FALSE | Endothelia Capillary E |
| ATGAGTC  | db/db1 | db/db | 3993 | 0.027758 | FALSE | 0.935403 | FALSE | Endothelia Venous EC   |
| ATGAGTC  | db/db1 | db/db | 2146 | 0.021669 | FALSE | 1.168175 | FALSE | Endothelia Capillary E |
| ATGAGTC  | db/db1 | db/db | 623  | 0.057037 | FALSE | 1.289839 | FALSE | Photoreceptor          |
| ATGAGTC  | db/db1 | db/db | 2960 | 0.071958 | FALSE | 0.898983 | FALSE | Endothelia Venous EC   |
| ATGAGTC  | db/db1 | db/db | 1482 | 0.009712 | FALSE | 1.145104 | FALSE | Endothelia Capillary E |
| ATGAGTC  | db/db1 | db/db | 1245 | 0.011805 | FALSE | 1.191126 | FALSE | Endothelia Aterial EC  |
| ATGAGTC  | db/db1 | db/db | 688  | 0.061912 | FALSE | 2.130191 | FALSE | Photoreceptor          |
| ATGAGTC  | db/db1 | db/db | 2583 | 0.039671 | FALSE | 1.171022 | FALSE | Photoreceptor          |
| ATGATCG  | db/db1 | db/db | 7158 | 0.028251 | FALSE | 0.625745 | FALSE | Photoreceptor          |
| ATGATCG  | db/db1 | db/db | 803  | 0.025416 | FALSE | 0.99818  | FALSE | Photoreceptor          |
| ATGCATG  | db/db1 | db/db | 1226 | 0.024971 | FALSE | 1.146978 | FALSE | Endothelia EC-C4       |
| ATGCATG  | db/db1 | db/db | 1536 | 0.045165 | FALSE | 1.727645 | FALSE | Endothelia EC-C4       |
| ATGCATG  | db/db1 | db/db | 5116 | 0.036232 | FALSE | 0.881126 | FALSE | Photoreceptor          |
| ATGCATG  | db/db1 | db/db | 1545 | 0.061912 | FALSE | 0.963054 | FALSE | Endothelia Venous EC   |
| ATGCATG  | db/db1 | db/db | 3303 | 0.012814 | FALSE | 1.070994 | FALSE | Neuron                 |
| ATGCATG  | db/db1 | db/db | 4720 | 0.076994 | FALSE | 0.703455 | FALSE | Photoreceptor          |
| ATGCATG  | db/db1 | db/db | 4234 | 0.046025 | FALSE | 0.977714 | FALSE | Endothelia Venous EC   |
| ATGCATG  | db/db1 | db/db | 1061 | 0.043505 | FALSE | 0.351696 | FALSE | Photoreceptor          |
| ATGCATG  | db/db1 | db/db | 800  | 0.020536 | FALSE | 0.618374 | FALSE | Photoreceptor          |
| ATGCATG  | db/db1 | db/db | 4779 | 0.027273 | FALSE | 0.923544 | FALSE | Photoreceptor          |
| ATGCATG  | db/db1 | db/db | 679  | 0.017758 | FALSE | 2.406362 | FALSE | Endothelia Capillary E |
| ATGCCTCA | db/db1 | db/db | 5679 | 0.016488 | FALSE | 0.860855 | FALSE | Photoreceptor          |
| ATGCCTCC | db/db1 | db/db | 3978 | 0.019106 | FALSE | 0.942177 | FALSE | Endothelia Venous EC   |
| ATGCCTCC | db/db1 | db/db | 3080 | 0.010846 | FALSE | 1.215971 | FALSE | Neuron                 |
| ATGCCTCC | db/db1 | db/db | 515  | 0.042704 | FALSE | 3.003599 | FALSE | Photoreceptor          |
| ATGCCTCC | db/db1 | db/db | 1411 | 0.093319 | FALSE | 1.446959 | FALSE | Photoreceptor          |
| ATGCCTCC | db/db1 | db/db | 816  | 0.059406 | FALSE | 3.517951 | FALSE | Muller cell            |
| ATGCCTCT | db/db1 | db/db | 3154 | 0.153234 | TRUE  | 1.500488 | FALSE |                        |
| ATGCGAT  | db/db1 | db/db | 735  | 0.01981  | FALSE | 2.539756 | FALSE | Neuron                 |
| ATGCGAT  | db/db1 | db/db | 665  | 0.045165 | FALSE | 3.922276 | FALSE | Muller cell            |
| ATGCGAT  | db/db1 | db/db | 3099 | 0.013876 | FALSE | 0.945606 | FALSE | Endothelia Venous EC   |
| ATGCGAT  | db/db1 | db/db | 4311 | 0.025868 | FALSE | 0.799749 | FALSE | Neuron                 |
| ATGCGAT  | db/db1 | db/db | 3421 | 0.017434 | FALSE | 1.282682 | FALSE | Photoreceptor          |
| ATGCGAT  | db/db1 | db/db | 2391 | 0.018761 | FALSE | 1.305771 | FALSE | Neuron                 |

|                 |       |      |          |       |          |       |                        |
|-----------------|-------|------|----------|-------|----------|-------|------------------------|
| ATGCGATC db/db1 | db/db | 4329 | 0.037564 | FALSE | 0.932881 | FALSE | Photoreceptor          |
| ATGCGATC db/db1 | db/db | 6932 | 0.019106 | FALSE | 0.700769 | FALSE | Photoreceptor          |
| ATGCGATC db/db1 | db/db | 953  | 0.049679 | FALSE | 0.747769 | FALSE | Photoreceptor          |
| ATGCGATT db/db1 | db/db | 519  | 0.060641 | FALSE | 2.532361 | FALSE | Photoreceptor          |
| ATGCGATT db/db1 | db/db | 442  | 0.091004 | FALSE | 6.238859 | TRUE  |                        |
| ATGCGATT db/db1 | db/db | 4725 | 0.027273 | FALSE | 0.731543 | FALSE | Photoreceptor          |
| ATGCGATT db/db1 | db/db | 5013 | 0.048732 | FALSE | 0.889589 | FALSE | Photoreceptor          |
| ATGGAGG db/db1  | db/db | 3753 | 0.052669 | FALSE | 0.973249 | FALSE | Neuron                 |
| ATGGAGG db/db1  | db/db | 778  | 0.015581 | FALSE | 0.229379 | FALSE | Photoreceptor          |
| ATGGAGG db/db1  | db/db | 2923 | 0.065957 | FALSE | 0.903147 | FALSE | Photoreceptor          |
| ATGGAGG db/db1  | db/db | 1208 | 0.018761 | FALSE | 0.484071 | FALSE | Photoreceptor          |
| ATGGAGG db/db1  | db/db | 8182 | 0.025416 | FALSE | 0.399414 | FALSE | Photoreceptor          |
| ATGGAGG db/db1  | db/db | 2323 | 0.100165 | TRUE  | 1.472798 | FALSE |                        |
| ATGGAGG db/db1  | db/db | 4040 | 0.03313  | FALSE | 1.183855 | FALSE | Photoreceptor          |
| ATGGAGG db/db1  | db/db | 8405 | 0.022455 | FALSE | 0.540233 | FALSE | Photoreceptor          |
| ATGGAGG db/db1  | db/db | 482  | 0.009493 | FALSE | 1.600946 | FALSE | Muller cell            |
| ATGGAGG db/db1  | db/db | 1347 | 0.012814 | FALSE | 1.467541 | FALSE | Endothelia Aterial EC  |
| ATGGAGG db/db1  | db/db | 4677 | 0.014429 | FALSE | 1.141422 | FALSE | Endothelia Venous EC   |
| ATGGAGG db/db1  | db/db | 8265 | 0.058205 | FALSE | 0.662011 | FALSE | Photoreceptor          |
| ATGGATC db/db1  | db/db | 714  | 0.078788 | FALSE | 2.775375 | FALSE | Endothelia Capillary E |
| ATGGATC db/db1  | db/db | 741  | 0.013338 | FALSE | 2.075117 | FALSE | Endothelia Capillary E |
| ATGGATC db/db1  | db/db | 2009 | 0.032546 | FALSE | 0.590141 | FALSE | Photoreceptor          |
| ATGGATCC db/db1 | db/db | 362  | 0.035586 | FALSE | 4.481256 | FALSE | Muller cell            |
| ATGGATCC db/db1 | db/db | 2288 | 0.017434 | FALSE | 1.116021 | FALSE | Endothelia Aterial EC  |
| ATGGATCC db/db1 | db/db | 3000 | 0.01981  | FALSE | 0.943189 | FALSE | Photoreceptor          |
| ATGGATCT db/db1 | db/db | 993  | 0.010614 | FALSE | 1.705882 | FALSE | Pericyte               |
| ATGGATCT db/db1 | db/db | 2467 | 0.002901 | FALSE | 0.829437 | FALSE | Neuron                 |
| ATGGGAG db/db1  | db/db | 3947 | 0.016799 | FALSE | 0.674568 | FALSE | Photoreceptor          |
| ATGGGAG db/db1  | db/db | 819  | 0.048732 | FALSE | 18.66097 | TRUE  |                        |
| ATGGGAG db/db1  | db/db | 1382 | 0.065957 | FALSE | 1.957399 | FALSE | Photoreceptor          |
| ATGGGAG db/db1  | db/db | 1219 | 0.020171 | FALSE | 1.240436 | FALSE | Endothelia Capillary E |
| ATGGGAG db/db1  | db/db | 495  | 0.200401 | TRUE  | 3.431373 | FALSE |                        |
| ATGGGAG db/db1  | db/db | 496  | 0.091004 | FALSE | 2.852028 | FALSE | Photoreceptor          |
| ATGGGAG db/db1  | db/db | 483  | 0.027758 | FALSE | 1.266583 | FALSE | Muller cell            |
| ATGGGAG db/db1  | db/db | 560  | 0.027758 | FALSE | 2.248747 | FALSE | Photoreceptor          |
| ATGGGAG db/db1  | db/db | 4474 | 0.022455 | FALSE | 0.578042 | FALSE | Photoreceptor          |
| ATGGGAG db/db1  | db/db | 1443 | 0.020908 | FALSE | 1.2218   | FALSE | Endothelia EC-C4       |
| ATGGGAG db/db1  | db/db | 420  | 0.046906 | FALSE | 2.373192 | FALSE | Endothelia Capillary E |
| ATGGGAG db/db1  | db/db | 1759 | 0.024971 | FALSE | 1.009651 | FALSE | Endothelia Capillary E |
| ATGGGAG db/db1  | db/db | 1484 | 0.014151 | FALSE | 0.976938 | FALSE | Endothelia EC-C4       |
| ATGGGTT db/db1  | db/db | 1890 | 0.061912 | FALSE | 1.044165 | FALSE | Photoreceptor          |
| ATGGGTT db/db1  | db/db | 788  | 0.034334 | FALSE | 2.886968 | FALSE | Endothelia Capillary E |
| ATGGGTT db/db1  | db/db | 1798 | 0.012557 | FALSE | 1.146328 | FALSE | Endothelia Capillary E |
| ATGGGTT db/db1  | db/db | 7647 | 0.034954 | FALSE | 0.601011 | FALSE | Photoreceptor          |
| ATGGGTT db/db1  | db/db | 778  | 0.035586 | FALSE | 0.277743 | FALSE | Photoreceptor          |
| ATGGGTT db/db1  | db/db | 4349 | 0.048732 | FALSE | 0.966817 | FALSE | Photoreceptor          |
| ATGGGTT db/db1  | db/db | 4285 | 0.024105 | FALSE | 0.537654 | FALSE | Photoreceptor          |

|                  |       |      |          |       |          |       |                        |
|------------------|-------|------|----------|-------|----------|-------|------------------------|
| ATGGTTG/ db/db1  | db/db | 3733 | 0.028754 | FALSE | 0.700626 | FALSE | Photoreceptor          |
| ATGGTTG/ db/db1  | db/db | 4486 | 0.027273 | FALSE | 0.8085   | FALSE | Endothelia Capillary E |
| ATGGTTG/ db/db1  | db/db | 1879 | 0.01981  | FALSE | 0.704822 | FALSE | Photoreceptor          |
| ATGGTTG/ db/db1  | db/db | 916  | 0.084562 | FALSE | 2.508441 | FALSE | Muller cell            |
| ATGGTTG( db/db1  | db/db | 4952 | 0.036891 | FALSE | 0.949668 | FALSE | Photoreceptor          |
| ATGGTTG( db/db1  | db/db | 712  | 0.130374 | TRUE  | 5.685279 | TRUE  |                        |
| ATGGTTG( db/db1  | db/db | 799  | 0.068864 | FALSE | 0.949165 | FALSE | Photoreceptor          |
| ATGGTTG( db/db1  | db/db | 444  | 0.060641 | FALSE | 3.481399 | FALSE | Muller cell            |
| ATGGTTG  db/db1  | db/db | 400  | 0.014997 | FALSE | 1.247177 | FALSE | Photoreceptor          |
| ATGGTTG  db/db1  | db/db | 2919 | 0.018761 | FALSE | 0.902617 | FALSE | Endothelia EC-C4       |
| ATGTCCCA db/db1  | db/db | 874  | 0.045165 | FALSE | 1.728833 | FALSE | Photoreceptor          |
| ATGTCCCA db/db1  | db/db | 4449 | 0.018088 | FALSE | 0.873532 | FALSE | Endothelia EC-C4       |
| ATGTCCCC db/db1  | db/db | 1071 | 0.019455 | FALSE | 1.17351  | FALSE | Endothelia Capillary E |
| ATGTCCCC db/db1  | db/db | 1311 | 0.063221 | FALSE | 1.703188 | FALSE | Endothelia Venous EC   |
| ATGTCTTA db/db1  | db/db | 5162 | 0.023682 | FALSE | 0.973442 | FALSE | Photoreceptor          |
| ATGTCTTC db/db1  | db/db | 3960 | 0.015287 | FALSE | 0.934546 | FALSE | Photoreceptor          |
| ATGTCTTG db/db1  | db/db | 1182 | 0.029787 | FALSE | 0.740879 | FALSE | Photoreceptor          |
| ATGTCTTG db/db1  | db/db | 7785 | 0.013876 | FALSE | 0.700694 | FALSE | Photoreceptor          |
| ATTACCTA db/db1  | db/db | 1843 | 0.016488 | FALSE | 1.005991 | FALSE | Endothelia Capillary E |
| ATTACCTA db/db1  | db/db | 2086 | 0.022857 | FALSE | 1.026249 | FALSE | Neuron                 |
| ATTACCTC db/db1  | db/db | 1971 | 0.076994 | FALSE | 5.008348 | TRUE  |                        |
| ATTACCTC db/db1  | db/db | 398  | 0.024971 | FALSE | 3.32394  | FALSE | Muller cell            |
| ATTACCTG db/db1  | db/db | 876  | 0.015879 | FALSE | 2.10727  | FALSE | Photoreceptor          |
| ATTACCTG db/db1  | db/db | 1019 | 0.411992 | TRUE  | 2.924791 | FALSE |                        |
| ATTACCTG db/db1  | db/db | 2019 | 0.076994 | FALSE | 1.046747 | FALSE | Photoreceptor          |
| ATTACCTG db/db1  | db/db | 834  | 0.035586 | FALSE | 1.231752 | FALSE | Photoreceptor          |
| ATTACCT  db/db1  | db/db | 1700 | 0.080645 | FALSE | 1.802242 | FALSE | Endothelia Capillary E |
| ATTACCT  db/db1  | db/db | 2815 | 0.022059 | FALSE | 0.790233 | FALSE | Photoreceptor          |
| ATTACCT  db/db1  | db/db | 5060 | 0.029787 | FALSE | 0.861604 | FALSE | Endothelia Capillary E |
| ATTACCT  db/db1  | db/db | 7318 | 0.021669 | FALSE | 0.618832 | FALSE | Photoreceptor          |
| ATTACTCA db/db1  | db/db | 3173 | 0.042704 | FALSE | 1.060461 | FALSE | Photoreceptor          |
| ATTACTCA db/db1  | db/db | 471  | 0.012557 | FALSE | 1.32429  | FALSE | Muller cell            |
| ATTACTCA db/db1  | db/db | 2943 | 0.023266 | FALSE | 1.123386 | FALSE | Endothelia Capillary E |
| ATTACTCC db/db1  | db/db | 918  | 0.036891 | FALSE | 1.204408 | FALSE | Photoreceptor          |
| ATTACTCG db/db1  | db/db | 1006 | 0.032546 | FALSE | 1.795149 | FALSE | Endothelia Capillary E |
| ATTATCCA db/db1  | db/db | 405  | 0.046906 | FALSE | 3.046025 | FALSE | Endothelia Capillary E |
| ATTATCCA db/db1  | db/db | 6325 | 0.095727 | FALSE | 0.476818 | FALSE | Photoreceptor          |
| ATTATCCC db/db1  | db/db | 491  | 0.033726 | FALSE | 1.481948 | FALSE | Photoreceptor          |
| ATTATCCC db/db1  | db/db | 1597 | 0.082569 | FALSE | 0.77978  | FALSE | Photoreceptor          |
| ATTATCCC db/db1  | db/db | 1645 | 0.018761 | FALSE | 1.305544 | FALSE | Endothelia Capillary E |
| ATTATCCC db/db1  | db/db | 3034 | 0.024105 | FALSE | 0.991444 | FALSE | Endothelia EC-C4       |
| ATTATCCC db/db1  | db/db | 8774 | 0.020171 | FALSE | 0.416016 | FALSE | Photoreceptor          |
| ATTATCCC db/db1  | db/db | 1701 | 0.020908 | FALSE | 1.276784 | FALSE | Photoreceptor          |
| ATTATCCT  db/db1 | db/db | 6647 | 0.036891 | FALSE | 0.719898 | FALSE | Photoreceptor          |
| ATTCATC db/db1   | db/db | 1588 | 0.024534 | FALSE | 0.756928 | FALSE | Photoreceptor          |
| ATTCACTG db/db1  | db/db | 781  | 0.051646 | FALSE | 2.82759  | FALSE | Endothelia Capillary E |
| ATTCACTG db/db1  | db/db | 985  | 0.067388 | FALSE | 2.053543 | FALSE | Pericyte               |



|                 |       |      |          |       |          |       |                        |
|-----------------|-------|------|----------|-------|----------|-------|------------------------|
| ATTCAGG/db/db1  | db/db | 7922 | 0.015581 | FALSE | 0.631809 | FALSE | Photoreceptor          |
| ATTCAGG/db/db1  | db/db | 790  | 0.022059 | FALSE | 0.958218 | FALSE | Endothelia Capillary E |
| ATTCAGG/db/db1  | db/db | 907  | 0.014997 | FALSE | 3.096906 | FALSE | Muller cell            |
| ATTCAGG/db/db1  | db/db | 2881 | 0.057037 | FALSE | 0.703069 | FALSE | Photoreceptor          |
| ATTCAGG/db/db1  | db/db | 2379 | 0.123864 | TRUE  | 3.517391 | FALSE |                        |
| ATTCAGG/db/db1  | db/db | 962  | 0.014711 | FALSE | 1.168197 | FALSE | Endothelia Capillary E |
| ATTCAGG/db/db1  | db/db | 2187 | 0.009277 | FALSE | 1.20839  | FALSE | Endothelia Capillary E |
| ATTCAGG/db/db1  | db/db | 3438 | 0.01981  | FALSE | 1.007927 | FALSE | Endothelia Venous EC   |
| ATTCAGG/db/db1  | db/db | 7190 | 0.014711 | FALSE | 0.479207 | FALSE | Photoreceptor          |
| ATTCATCC/db/db1 | db/db | 4864 | 0.026328 | FALSE | 0.888609 | FALSE | Photoreceptor          |
| ATTCATCC/db/db1 | db/db | 4489 | 0.022455 | FALSE | 1.107799 | FALSE | Photoreceptor          |
| ATTCATCG/db/db1 | db/db | 3007 | 0.122691 | TRUE  | 1.9269   | FALSE |                        |
| ATTCATCG/db/db1 | db/db | 2689 | 0.018088 | FALSE | 0.844763 | FALSE | Endothelia EC-C4       |
| ATTCATCG/db/db1 | db/db | 2068 | 0.015879 | FALSE | 1.200736 | FALSE | Endothelia Venous EC   |
| ATTCATCT/db/db1 | db/db | 1920 | 0.011561 | FALSE | 0.971977 | FALSE | Endothelia EC-C4       |
| ATTCATA/db/db1  | db/db | 2508 | 0.043505 | FALSE | 1.128692 | FALSE | Photoreceptor          |
| ATTCATC/db/db1  | db/db | 796  | 0.006317 | FALSE | 1.38609  | FALSE | Pericyte               |
| ATTCATG/db/db1  | db/db | 1389 | 0.065957 | FALSE | 1.5245   | FALSE | Photoreceptor          |
| ATTCATG/db/db1  | db/db | 387  | 0.012557 | FALSE | 2.930671 | FALSE | Endothelia Capillary E |
| ATTCATT/db/db1  | db/db | 8232 | 0.035586 | FALSE | 0.493728 | FALSE | Photoreceptor          |
| ATTCATT/db/db1  | db/db | 914  | 0.041154 | FALSE | 1.858736 | FALSE | Photoreceptor          |
| ATTCATT/db/db1  | db/db | 2382 | 0.357022 | TRUE  | 1.363946 | FALSE |                        |
| ATTCCTGA/db/db1 | db/db | 1877 | 0.065957 | FALSE | 1.385887 | FALSE | Photoreceptor          |
| ATTCCTGA/db/db1 | db/db | 619  | 0.043505 | FALSE | 0.629816 | FALSE | Photoreceptor          |
| ATTCCTG/db/db1  | db/db | 5606 | 0.027273 | FALSE | 0.681023 | FALSE | Photoreceptor          |
| ATTCCTG/db/db1  | db/db | 4583 | 0.031973 | FALSE | 0.803709 | FALSE | Endothelia Capillary E |
| ATTCCTG/db/db1  | db/db | 2436 | 0.13452  | TRUE  | 4.10707  | FALSE |                        |
| ATTCCTAA/db/db1 | db/db | 2322 | 0.009712 | FALSE | 1.297974 | FALSE | Endothelia Capillary E |
| ATTCCTAA/db/db1 | db/db | 553  | 0.011561 | FALSE | 2.460869 | FALSE | Photoreceptor          |
| ATTCCTAA/db/db1 | db/db | 6852 | 0.015879 | FALSE | 0.391745 | FALSE | Photoreceptor          |
| ATTCCTAC/db/db1 | db/db | 3042 | 0.026796 | FALSE | 1.10022  | FALSE | Endothelia Capillary E |
| ATTCCTAC/db/db1 | db/db | 7687 | 0.018761 | FALSE | 0.622763 | FALSE | Photoreceptor          |
| ATTCCTAC/db/db1 | db/db | 1855 | 0.01981  | FALSE | 1.072058 | FALSE | Endothelia EC-C4       |
| ATTCCTAG/db/db1 | db/db | 7263 | 0.024105 | FALSE | 0.5497   | FALSE | Photoreceptor          |
| ATTCCTAG/db/db1 | db/db | 1357 | 0.028754 | FALSE | 1.338581 | FALSE | Pericyte               |
| ATTCCTAT/db/db1 | db/db | 8231 | 0.013338 | FALSE | 0.51011  | FALSE | Photoreceptor          |
| ATTCGTTA/db/db1 | db/db | 1504 | 0.036891 | FALSE | 1.460447 | FALSE | Neuron                 |
| ATTCGTTA/db/db1 | db/db | 6932 | 0.184701 | TRUE  | 1.994333 | FALSE |                        |
| ATTCGTTC/db/db1 | db/db | 4162 | 0.026328 | FALSE | 1.198219 | FALSE | Photoreceptor          |
| ATTCGTTC/db/db1 | db/db | 1556 | 0.025416 | FALSE | 1.355954 | FALSE | Pericyte               |
| ATTCGTTC/db/db1 | db/db | 3953 | 0.020908 | FALSE | 0.966674 | FALSE | Endothelia Capillary E |
| ATTCGTTC/db/db1 | db/db | 1088 | 0.045165 | FALSE | 1.340981 | FALSE | Photoreceptor          |
| ATTCGTTC/db/db1 | db/db | 1893 | 0.051646 | FALSE | 1.383988 | FALSE | Neuron                 |
| ATTCGTTC/db/db1 | db/db | 990  | 0.05065  | FALSE | 0.917771 | FALSE | Neuron                 |
| ATTCGTTG/db/db1 | db/db | 2438 | 0.164835 | TRUE  | 1.569052 | FALSE |                        |
| ATTCGTTG/db/db1 | db/db | 8371 | 0.357022 | TRUE  | 0.8285   | FALSE |                        |
| ATTCGTTG/db/db1 | db/db | 4319 | 0.021669 | FALSE | 0.956941 | FALSE | Endothelia Venous EC   |

|                 |       |      |          |       |          |       |                        |
|-----------------|-------|------|----------|-------|----------|-------|------------------------|
| ATTCGTTT db/db1 | db/db | 2695 | 0.018761 | FALSE | 0.712132 | FALSE | Photoreceptor          |
| ATTCGTTT db/db1 | db/db | 1442 | 0.095727 | FALSE | 1.992833 | FALSE | Endothelia Capillary E |
| ATTCTACA db/db1 | db/db | 8457 | 0.029266 | FALSE | 0.497737 | FALSE | Photoreceptor          |
| ATTCTACA db/db1 | db/db | 352  | 0.030318 | FALSE | 2.058392 | FALSE | Endothelia Venous EC   |
| ATTCTACC db/db1 | db/db | 4889 | 0.015581 | FALSE | 0.387117 | FALSE | Photoreceptor          |
| ATTCTACC db/db1 | db/db | 6643 | 0.314286 | TRUE  | 1.395049 | FALSE |                        |
| ATTCTACC db/db1 | db/db | 1814 | 0.040404 | FALSE | 1.333752 | FALSE | Endothelia Venous EC   |
| ATTCTACT db/db1 | db/db | 1250 | 0.082569 | FALSE | 1.167005 | FALSE | Photoreceptor          |
| ATTCTTGA db/db1 | db/db | 991  | 0.057037 | FALSE | 0.75375  | FALSE | Photoreceptor          |
| ATTCTTGA db/db1 | db/db | 559  | 0.023266 | FALSE | 2.731318 | FALSE | Endothelia Capillary E |
| ATTCTTGA db/db1 | db/db | 1200 | 0.130259 | TRUE  | 1.46789  | FALSE |                        |
| ATTCTTGC db/db1 | db/db | 1425 | 0.029787 | FALSE | 0.669266 | FALSE | Photoreceptor          |
| ATTCTTGC db/db1 | db/db | 5247 | 0.058205 | FALSE | 0.79624  | FALSE | Photoreceptor          |
| ATTCTTGG db/db1 | db/db | 937  | 0.060641 | FALSE | 1.683212 | FALSE | Photoreceptor          |
| ATTCTTGT db/db1 | db/db | 2768 | 0.314286 | TRUE  | 2.569632 | FALSE |                        |
| ATTCTTGT db/db1 | db/db | 2176 | 0.030859 | FALSE | 1.127712 | FALSE | Endothelia Venous EC   |
| ATTGGGT db/db1  | db/db | 5805 | 0.023266 | FALSE | 0.612922 | FALSE | Photoreceptor          |
| ATTGGGT db/db1  | db/db | 2196 | 0.095727 | FALSE | 1.332551 | FALSE | Endothelia EC-C4       |
| ATTGGGT db/db1  | db/db | 518  | 0.015287 | FALSE | 1.113059 | FALSE | Photoreceptor          |
| ATTGGGT db/db1  | db/db | 4053 | 0.009933 | FALSE | 0.803382 | FALSE | Endothelia EC-C4       |
| ATTGGGT db/db1  | db/db | 592  | 0.100845 | TRUE  | 12.23815 | TRUE  |                        |
| ATTGGGT db/db1  | db/db | 420  | 0.015287 | FALSE | 1.373013 | FALSE | Photoreceptor          |
| ATTGTTCC db/db1 | db/db | 627  | 0.024971 | FALSE | 1.129074 | FALSE | Neuron                 |
| ATTGTTCC db/db1 | db/db | 4024 | 0.032546 | FALSE | 1.001885 | FALSE | Endothelia Venous EC   |
| ATTGTTCT db/db1 | db/db | 583  | 0.130259 | TRUE  | 0.767264 | FALSE |                        |
| ATTTACCA db/db1 | db/db | 770  | 0.014429 | FALSE | 0.400654 | FALSE | Photoreceptor          |
| ATTTACCA db/db1 | db/db | 1098 | 0.044326 | FALSE | 0.981057 | FALSE | Photoreceptor          |
| ATTTACCA db/db1 | db/db | 2584 | 0.100845 | TRUE  | 2.483416 | FALSE |                        |
| ATTTACCA db/db1 | db/db | 841  | 0.021669 | FALSE | 0.652773 | FALSE | Photoreceptor          |
| ATTTACCC db/db1 | db/db | 6914 | 0.011561 | FALSE | 0.495515 | FALSE | Photoreceptor          |
| ATTTACCC db/db1 | db/db | 5129 | 0.018422 | FALSE | 0.506184 | FALSE | Photoreceptor          |
| ATTTACCC db/db1 | db/db | 1713 | 0.034954 | FALSE | 0.795448 | FALSE | Photoreceptor          |
| ATTTACCC db/db1 | db/db | 3542 | 0.025868 | FALSE | 1.031176 | FALSE | Endothelia Venous EC   |
| ATTTACCG db/db1 | db/db | 2323 | 0.014429 | FALSE | 1.002243 | FALSE | Endothelia Venous EC   |
| ATTTACCG db/db1 | db/db | 6544 | 0.018761 | FALSE | 0.456786 | FALSE | Photoreceptor          |
| ATTTACCT db/db1 | db/db | 3256 | 0.015287 | FALSE | 0.881354 | FALSE | Endothelia Capillary E |
| ATTTACCT db/db1 | db/db | 4463 | 0.028251 | FALSE | 0.942742 | FALSE | Endothelia EC-C4       |
| ATTTACCA db/db1 | db/db | 1551 | 0.05065  | FALSE | 1.320279 | FALSE | Photoreceptor          |
| ATTTACCA db/db1 | db/db | 588  | 0.043505 | FALSE | 2.654442 | FALSE | Photoreceptor          |
| ATTTACCA db/db1 | db/db | 2362 | 0.009712 | FALSE | 0.969359 | FALSE | Endothelia EC-C4       |
| ATTTACCC db/db1 | db/db | 2340 | 0.026796 | FALSE | 0.830534 | FALSE | Photoreceptor          |
| ATTTACCC db/db1 | db/db | 1147 | 0.107704 | TRUE  | 3.057325 | FALSE |                        |
| ATTTACCC db/db1 | db/db | 2472 | 0.013338 | FALSE | 1.110114 | FALSE | Photoreceptor          |
| ATTTACCC db/db1 | db/db | 1867 | 0.022059 | FALSE | 0.388518 | FALSE | Photoreceptor          |
| ATTTACT db/db1  | db/db | 636  | 0.018422 | FALSE | 2.351262 | FALSE | Endothelia Capillary E |
| ATTTACT db/db1  | db/db | 4040 | 0.016488 | FALSE | 0.90794  | FALSE | Endothelia Venous EC   |
| ATTTACT db/db1  | db/db | 1885 | 0.011319 | FALSE | 1.143434 | FALSE | Endothelia Capillary E |

|          |        |       |      |          |       |          |       |                        |
|----------|--------|-------|------|----------|-------|----------|-------|------------------------|
| ATTTCAC  | db/db1 | db/db | 2407 | 0.068864 | FALSE | 0.996177 | FALSE | Endothelia Venous EC   |
| ATTTCAG  | db/db1 | db/db | 3557 | 0.034954 | FALSE | 0.904641 | FALSE | Photoreceptor          |
| ATTTCAG  | db/db1 | db/db | 5915 | 0.046906 | FALSE | 0.796616 | FALSE | Photoreceptor          |
| CAAAGAA  | db/db1 | db/db | 493  | 0.029787 | FALSE | 3.363642 | FALSE | Muller cell            |
| CAAAGAA  | db/db1 | db/db | 636  | 0.031973 | FALSE | 0.439908 | FALSE | Photoreceptor          |
| CAAAGAA  | db/db1 | db/db | 1297 | 0.061912 | FALSE | 2.131686 | FALSE | Photoreceptor          |
| CAAAGAA  | db/db1 | db/db | 1002 | 0.082569 | FALSE | 2.004801 | FALSE | Muller cell            |
| CAAAGAA  | db/db1 | db/db | 2703 | 0.021669 | FALSE | 0.329668 | FALSE | Photoreceptor          |
| CAAAGAA  | db/db1 | db/db | 4185 | 0.021286 | FALSE | 0.895393 | FALSE | Endothelia EC-C4       |
| CAAAGAA  | db/db1 | db/db | 812  | 0.03313  | FALSE | 0.610206 | FALSE | Photoreceptor          |
| CAAAGAA  | db/db1 | db/db | 3826 | 0.030859 | FALSE | 0.561616 | FALSE | Photoreceptor          |
| CAAAGAA  | db/db1 | db/db | 535  | 0.120957 | TRUE  | 4.495913 | FALSE |                        |
| CAAAGAA  | db/db1 | db/db | 480  | 0.033726 | FALSE | 1.31899  | FALSE | Photoreceptor          |
| CAACAAC  | db/db1 | db/db | 2020 | 0.060641 | FALSE | 0.933821 | FALSE | Photoreceptor          |
| CAACAAC  | db/db1 | db/db | 2522 | 0.041154 | FALSE | 1.41404  | FALSE | Endothelia Venous EC   |
| CAACAAC  | db/db1 | db/db | 4192 | 0.031973 | FALSE | 0.636645 | FALSE | Endothelia EC-C4       |
| CAACAAC  | db/db1 | db/db | 809  | 0.012814 | FALSE | 0.679411 | FALSE | Endothelia Capillary E |
| CAACAAC  | db/db1 | db/db | 1384 | 0.116912 | TRUE  | 2.623907 | FALSE |                        |
| CAACAAC  | db/db1 | db/db | 453  | 0.022857 | FALSE | 1.711563 | FALSE | Photoreceptor          |
| CAACAAC  | db/db1 | db/db | 2746 | 0.017114 | FALSE | 0.95778  | FALSE | Endothelia EC-C4       |
| CAACAAC  | db/db1 | db/db | 470  | 0.067388 | FALSE | 3.180486 | FALSE | Endothelia Capillary E |
| CAACAAC  | db/db1 | db/db | 3520 | 0.184701 | TRUE  | 2.700607 | FALSE |                        |
| CAACAGT  | db/db1 | db/db | 3550 | 0.091004 | FALSE | 1.040779 | FALSE | Photoreceptor          |
| CAACAGT  | db/db1 | db/db | 403  | 0.129326 | TRUE  | 3.917911 | FALSE |                        |
| CAACAGT  | db/db1 | db/db | 380  | 0.113205 | TRUE  | 4.536862 | FALSE |                        |
| CAACAGT  | db/db1 | db/db | 873  | 0.038251 | FALSE | 2.791656 | FALSE | Endothelia Aterial EC  |
| CAACAGT  | db/db1 | db/db | 905  | 0.055901 | FALSE | 1.636296 | FALSE | Photoreceptor          |
| CAACAGT  | db/db1 | db/db | 757  | 0.012303 | FALSE | 2.318117 | FALSE | Pericyte               |
| CAACAGT  | db/db1 | db/db | 1625 | 0.03313  | FALSE | 0.706724 | FALSE | Photoreceptor          |
| CAACAGT  | db/db1 | db/db | 512  | 0.010384 | FALSE | 0.956408 | FALSE | Photoreceptor          |
| CAACAGT  | db/db1 | db/db | 2027 | 0.039671 | FALSE | 0.926121 | FALSE | Microglia              |
| CAACAGT  | db/db1 | db/db | 1091 | 0.078788 | FALSE | 0.811323 | FALSE | Photoreceptor          |
| CAACAGT  | db/db1 | db/db | 928  | 0.034954 | FALSE | 0.837717 | FALSE | Photoreceptor          |
| CAACAGT  | db/db1 | db/db | 1991 | 0.002901 | FALSE | 1.193317 | FALSE | Neuron                 |
| CAACAGT  | db/db1 | db/db | 499  | 0.030859 | FALSE | 0.473845 | FALSE | Muller cell            |
| CAACCAA  | db/db1 | db/db | 1569 | 0.024971 | FALSE | 1.43604  | FALSE | Endothelia Capillary E |
| CAACCAA  | db/db1 | db/db | 696  | 0.036232 | FALSE | 1.332241 | FALSE | Photoreceptor          |
| CAACCAA  | db/db1 | db/db | 771  | 0.041154 | FALSE | 0.730072 | FALSE | Photoreceptor          |
| CAACCAA  | db/db1 | db/db | 7377 | 0.017114 | FALSE | 0.702162 | FALSE | Photoreceptor          |
| CAACCAAT | db/db1 | db/db | 1216 | 0.011805 | FALSE | 1.856936 | FALSE | Pericyte               |
| CAACCTCA | db/db1 | db/db | 492  | 0.063221 | FALSE | 2.420219 | FALSE | Endothelia Capillary E |
| CAACCTCA | db/db1 | db/db | 954  | 0.031411 | FALSE | 0.57626  | FALSE | Photoreceptor          |
| CAACCTCA | db/db1 | db/db | 1156 | 0.014151 | FALSE | 0.896023 | FALSE | Endothelia Capillary E |
| CAACCTCC | db/db1 | db/db | 9348 | 0.010846 | FALSE | 0.29547  | FALSE | Photoreceptor          |
| CAACCTCG | db/db1 | db/db | 5674 | 0.119124 | TRUE  | 3.062106 | FALSE |                        |
| CAACCTCT | db/db1 | db/db | 856  | 0.040404 | FALSE | 1.040531 | FALSE | Photoreceptor          |
| CAACCTCT | db/db1 | db/db | 1786 | 0.022857 | FALSE | 0.776318 | FALSE | Endothelia EC-C4       |

|                 |       |      |          |       |          |       |                        |
|-----------------|-------|------|----------|-------|----------|-------|------------------------|
| CAACGAT# db/db1 | db/db | 1518 | 0.027273 | FALSE | 0.954516 | FALSE | Photoreceptor          |
| CAACGAT# db/db1 | db/db | 6730 | 0.026796 | FALSE | 0.775905 | FALSE | Photoreceptor          |
| CAACGAT# db/db1 | db/db | 1091 | 0.012814 | FALSE | 1.330884 | FALSE | Endothelia EC-C4       |
| CAACGATC db/db1 | db/db | 1493 | 0.043505 | FALSE | 0.670472 | FALSE | Photoreceptor          |
| CAACGATC db/db1 | db/db | 508  | 0.075259 | FALSE | 2.423399 | FALSE | Endothelia Capillary E |
| CAACGATC db/db1 | db/db | 2683 | 0.059406 | FALSE | 1.533753 | FALSE | Photoreceptor          |
| CAACGATT db/db1 | db/db | 2504 | 0.018422 | FALSE | 0.447496 | FALSE | Photoreceptor          |
| CAACGATT db/db1 | db/db | 1953 | 0.110901 | TRUE  | 1.494044 | FALSE |                        |
| CAACGATT db/db1 | db/db | 6214 | 0.044326 | FALSE | 0.620981 | FALSE | Photoreceptor          |
| CAACGATT db/db1 | db/db | 2521 | 0.012052 | FALSE | 0.733339 | FALSE | Endothelia EC-C4       |
| CAACGGC# db/db1 | db/db | 2220 | 0.010384 | FALSE | 0.944795 | FALSE | Endothelia EC-C4       |
| CAACGGC# db/db1 | db/db | 2800 | 0.043505 | FALSE | 0.504979 | FALSE | Photoreceptor          |
| CAACGGC( db/db1 | db/db | 970  | 0.041154 | FALSE | 3.329508 | FALSE | Muller cell            |
| CAACGGC( db/db1 | db/db | 1751 | 0.048732 | FALSE | 1.395594 | FALSE | Photoreceptor          |
| CAACGGC( db/db1 | db/db | 422  | 0.034334 | FALSE | 2.721083 | FALSE | Photoreceptor          |
| CAACGGC( db/db1 | db/db | 875  | 0.05065  | FALSE | 1.867372 | FALSE | Photoreceptor          |
| CAACGGC( db/db1 | db/db | 1567 | 0.025416 | FALSE | 1.371811 | FALSE | Endothelia Capillary E |
| CAACGGC( db/db1 | db/db | 417  | 0.093319 | FALSE | 2.196882 | FALSE | Endothelia Capillary E |
| CAACGGC  db/db1 | db/db | 2003 | 0.047807 | FALSE | 1.181677 | FALSE | Pericyte               |
| CAACGGC  db/db1 | db/db | 3822 | 0.030859 | FALSE | 1.035656 | FALSE | Endothelia Venous EC   |
| CAAGACT# db/db1 | db/db | 741  | 0.052669 | FALSE | 2.41861  | FALSE | Neuron                 |
| CAAGACTC db/db1 | db/db | 3070 | 0.106408 | TRUE  | 1.681781 | FALSE |                        |
| CAAGACTC db/db1 | db/db | 8819 | 0.017758 | FALSE | 0.403147 | FALSE | Photoreceptor          |
| CAAGACTC db/db1 | db/db | 1237 | 0.020536 | FALSE | 0.385438 | FALSE | Photoreceptor          |
| CAAGACTC db/db1 | db/db | 2851 | 0.024534 | FALSE | 0.610338 | FALSE | Photoreceptor          |
| CAAGACTC db/db1 | db/db | 6288 | 0.048732 | FALSE | 0.721496 | FALSE | Photoreceptor          |
| CAAGACTT db/db1 | db/db | 2092 | 0.040404 | FALSE | 1.514705 | FALSE | Photoreceptor          |
| CAAGAGG. db/db1 | db/db | 579  | 0.059406 | FALSE | 3.435392 | FALSE | Muller cell            |
| CAAGAGG. db/db1 | db/db | 1485 | 0.054795 | FALSE | 1.249224 | FALSE | Photoreceptor          |
| CAAGAGG. db/db1 | db/db | 700  | 0.035586 | FALSE | 1.720826 | FALSE | Endothelia Capillary E |
| CAAGAGG. db/db1 | db/db | 4450 | 0.025416 | FALSE | 0.927668 | FALSE | Photoreceptor          |
| CAAGAGG. db/db1 | db/db | 1455 | 0.025416 | FALSE | 0.837797 | FALSE | Photoreceptor          |
| CAAGAGG` db/db1 | db/db | 1433 | 0.008852 | FALSE | 1.143625 | FALSE | Endothelia Capillary E |
| CAAGCTAT db/db1 | db/db | 3138 | 0.018422 | FALSE | 0.883555 | FALSE | Endothelia EC-C4       |
| CAAGCTAT db/db1 | db/db | 6575 | 0.025416 | FALSE | 0.674229 | FALSE | Photoreceptor          |
| CAAGGGA. db/db1 | db/db | 603  | 0.027273 | FALSE | 0.633294 | FALSE | Photoreceptor          |
| CAAGGGA. db/db1 | db/db | 684  | 0.052669 | FALSE | 2.297139 | FALSE | Muller cell            |
| CAAGGGA. db/db1 | db/db | 1582 | 0.016488 | FALSE | 1.032181 | FALSE | Endothelia Capillary E |
| CAAGGGA. db/db1 | db/db | 2857 | 0.038251 | FALSE | 0.944596 | FALSE | Endothelia Capillary E |
| CAAGGGA. db/db1 | db/db | 1865 | 0.022857 | FALSE | 1.204563 | FALSE | Endothelia Capillary E |
| CAAGGGA. db/db1 | db/db | 1381 | 0.029787 | FALSE | 2.686569 | FALSE | Muller cell            |
| CAAGGGA. db/db1 | db/db | 1120 | 0.047807 | FALSE | 2.201421 | FALSE | Muller cell            |
| CAAGGGA. db/db1 | db/db | 5668 | 0.042704 | FALSE | 0.88977  | FALSE | Photoreceptor          |
| CAAGGGA. db/db1 | db/db | 388  | 0.070386 | FALSE | 13.33333 | TRUE  |                        |
| CAAGGGA. db/db1 | db/db | 5829 | 0.03313  | FALSE | 0.831576 | FALSE | Photoreceptor          |
| CAAGGGA. db/db1 | db/db | 1020 | 0.04192  | FALSE | 0.870995 | FALSE | Photoreceptor          |
| CAATACG# db/db1 | db/db | 482  | 0.098234 | FALSE | 3.04031  | FALSE | Endothelia Capillary E |

|                 |       |      |          |       |          |       |                        |
|-----------------|-------|------|----------|-------|----------|-------|------------------------|
| CAATACG db/db1  | db/db | 3432 | 0.015581 | FALSE | 0.942413 | FALSE | Endothelia Venous EC   |
| CAATACG db/db1  | db/db | 3563 | 0.065957 | FALSE | 1.050457 | FALSE | Photoreceptor          |
| CAATACG db/db1  | db/db | 636  | 0.051646 | FALSE | 4.014534 | FALSE | Muller cell            |
| CAATACG db/db1  | db/db | 809  | 0.084562 | FALSE | 1.414071 | FALSE | Photoreceptor          |
| CAATACG db/db1  | db/db | 3391 | 0.01981  | FALSE | 1.172537 | FALSE | Photoreceptor          |
| CAATACG db/db1  | db/db | 1765 | 0.055901 | FALSE | 1.569333 | FALSE | Endothelia Capillary E |
| CAATACG db/db1  | db/db | 1056 | 0.008852 | FALSE | 1.973426 | FALSE | Pericyte               |
| CAATACG db/db1  | db/db | 1513 | 0.025868 | FALSE | 0.74909  | FALSE | Photoreceptor          |
| CAATACG db/db1  | db/db | 743  | 0.022455 | FALSE | 2.440444 | FALSE | Endothelia Capillary E |
| CAATACG db/db1  | db/db | 5452 | 0.027758 | FALSE | 0.332153 | FALSE | Photoreceptor          |
| CAATACG db/db1  | db/db | 1337 | 0.070386 | FALSE | 2.013779 | FALSE | Photoreceptor          |
| CAATCGA db/db1  | db/db | 5118 | 0.063221 | FALSE | 0.674657 | FALSE | Neuron                 |
| CAATCGA db/db1  | db/db | 778  | 0.091004 | FALSE | 1.926208 | FALSE | Photoreceptor          |
| CAATCGA db/db1  | db/db | 477  | 0.061912 | FALSE | 3.137975 | FALSE | Muller cell            |
| CAATCGA db/db1  | db/db | 1222 | 0.031973 | FALSE | 0.537167 | FALSE | Photoreceptor          |
| CAATCGA db/db1  | db/db | 2786 | 0.038251 | FALSE | 0.95466  | FALSE | Photoreceptor          |
| CAATCGA db/db1  | db/db | 570  | 0.031973 | FALSE | 1.393826 | FALSE | Neuron                 |
| CAATGAC db/db1  | db/db | 2436 | 0.028251 | FALSE | 1.410686 | FALSE | Pericyte               |
| CAATGAC db/db1  | db/db | 866  | 0.025416 | FALSE | 0.572167 | FALSE | Photoreceptor          |
| CAATGAC db/db1  | db/db | 5493 | 0.034334 | FALSE | 0.759607 | FALSE | Photoreceptor          |
| CAATGAC db/db1  | db/db | 4251 | 0.032546 | FALSE | 0.746351 | FALSE | Photoreceptor          |
| CAATGAC db/db1  | db/db | 1230 | 0.013338 | FALSE | 1.541934 | FALSE | Endothelia Capillary E |
| CAATGAC db/db1  | db/db | 1015 | 0.070386 | FALSE | 2.181638 | FALSE | Photoreceptor          |
| CAATGAC db/db1  | db/db | 2163 | 0.03313  | FALSE | 1.046026 | FALSE | Endothelia Capillary E |
| CAATGAC db/db1  | db/db | 6428 | 0.022059 | FALSE | 0.652609 | FALSE | Photoreceptor          |
| CAATGAC db/db1  | db/db | 4524 | 0.025868 | FALSE | 0.775581 | FALSE | Endothelia Capillary E |
| CAATGAC db/db1  | db/db | 2093 | 0.046025 | FALSE | 1.31899  | FALSE | Photoreceptor          |
| CAATGAC db/db1  | db/db | 1379 | 0.020536 | FALSE | 0.443075 | FALSE | Photoreceptor          |
| CAATGAC db/db1  | db/db | 940  | 0.030859 | FALSE | 1.220687 | FALSE | Photoreceptor          |
| CAATGAC db/db1  | db/db | 1649 | 0.012303 | FALSE | 0.875986 | FALSE | Endothelia EC-C4       |
| CAATTTCA db/db1 | db/db | 2881 | 0.052669 | FALSE | 1.077187 | FALSE | Endothelia Venous EC   |
| CAATTTCA db/db1 | db/db | 1535 | 0.038251 | FALSE | 1.136463 | FALSE | Photoreceptor          |
| CAATTTCA db/db1 | db/db | 2214 | 0.013876 | FALSE | 0.893266 | FALSE | Endothelia Capillary E |
| CAATTTCA db/db1 | db/db | 1250 | 0.060641 | FALSE | 1.560408 | FALSE | Photoreceptor          |
| CAATTTCA db/db1 | db/db | 2641 | 0.017114 | FALSE | 1.193153 | FALSE | Endothelia Capillary E |
| CAATTTCC db/db1 | db/db | 1010 | 0.058205 | FALSE | 1.993615 | FALSE | Muller cell            |
| CAATTTCC db/db1 | db/db | 2240 | 0.015287 | FALSE | 1.092389 | FALSE | Endothelia EC-C4       |
| CAATTTCC db/db1 | db/db | 427  | 0.098234 | FALSE | 2.494752 | FALSE | Endothelia Capillary E |
| CAATTTCC db/db1 | db/db | 1631 | 0.04192  | FALSE | 1.39663  | FALSE | Photoreceptor          |
| CAATTTCC db/db1 | db/db | 795  | 0.065957 | FALSE | 2.228198 | FALSE | Endothelia Capillary E |
| CAATTTCC db/db1 | db/db | 1326 | 0.019106 | FALSE | 0.374084 | FALSE | Photoreceptor          |
| CAATTTCC db/db1 | db/db | 645  | 0.012814 | FALSE | 1.559019 | FALSE | Endothelia Capillary E |
| CAATTTCC db/db1 | db/db | 3530 | 0.070386 | FALSE | 0.816713 | FALSE | Endothelia EC-C4       |
| CAATTTCT db/db1 | db/db | 866  | 0.048732 | FALSE | 0.356468 | FALSE | Photoreceptor          |
| CACAACA db/db1  | db/db | 1871 | 0.022455 | FALSE | 0.989099 | FALSE | Photoreceptor          |
| CACAACA db/db1  | db/db | 8367 | 0.015879 | FALSE | 0.30712  | FALSE | Photoreceptor          |
| CACAACA db/db1  | db/db | 1311 | 0.028251 | FALSE | 1.415204 | FALSE | Endothelia Venous EC   |

|                 |       |      |          |       |          |       |                        |
|-----------------|-------|------|----------|-------|----------|-------|------------------------|
| CACAACAC db/db1 | db/db | 1224 | 0.037564 | FALSE | 1.412686 | FALSE | Photoreceptor          |
| CACAACAC db/db1 | db/db | 782  | 0.164835 | TRUE  | 5.116697 | TRUE  |                        |
| CACAACAC db/db1 | db/db | 610  | 0.024971 | FALSE | 2.517822 | FALSE | Photoreceptor          |
| CACAACAC db/db1 | db/db | 919  | 0.019106 | FALSE | 1.652561 | FALSE | Endothelia Capillary E |
| CACAACAC db/db1 | db/db | 2537 | 0.060641 | FALSE | 1.069173 | FALSE | Photoreceptor          |
| CACAACAC db/db1 | db/db | 540  | 0.003959 | FALSE | 2.952314 | FALSE | Pericyte               |
| CACAACAC db/db1 | db/db | 1720 | 0.112037 | TRUE  | 1.328087 | FALSE |                        |
| CACAACAC db/db1 | db/db | 876  | 0.022857 | FALSE | 2.454713 | FALSE | Photoreceptor          |
| CACAACAC db/db1 | db/db | 1713 | 0.048732 | FALSE | 1.237327 | FALSE | Photoreceptor          |
| CACAACAT db/db1 | db/db | 479  | 0.334395 | TRUE  | 1.226994 | FALSE |                        |
| CACAACAT db/db1 | db/db | 5233 | 0.047807 | FALSE | 0.955345 | FALSE | Photoreceptor          |
| CACAACAT db/db1 | db/db | 7972 | 0.020536 | FALSE | 0.33374  | FALSE | Photoreceptor          |
| CACAACAT db/db1 | db/db | 1981 | 0.064568 | FALSE | 1.726146 | FALSE | Photoreceptor          |
| CACAACAT db/db1 | db/db | 643  | 0.008644 | FALSE | 0.329431 | FALSE | Photoreceptor          |
| CACAACAT db/db1 | db/db | 854  | 0.048732 | FALSE | 1.288568 | FALSE | Photoreceptor          |
| CACAACAT db/db1 | db/db | 382  | 0.027273 | FALSE | 2.112418 | FALSE | Microglia              |
| CACAACAT db/db1 | db/db | 5536 | 0.13452  | TRUE  | 2.767378 | FALSE |                        |
| CACACAAC db/db1 | db/db | 1771 | 0.015287 | FALSE | 0.827557 | FALSE | Endothelia Capillary E |
| CACACAAC db/db1 | db/db | 1937 | 0.164835 | TRUE  | 8.231884 | TRUE  |                        |
| CACACAAC db/db1 | db/db | 875  | 0.020908 | FALSE | 0.30796  | FALSE | Photoreceptor          |
| CACACAAC db/db1 | db/db | 2325 | 0.026796 | FALSE | 1.029172 | FALSE | Endothelia Capillary E |
| CACACAAT db/db1 | db/db | 4329 | 0.030318 | FALSE | 0.825921 | FALSE | Endothelia Venous EC   |
| CACAGAT db/db1  | db/db | 2465 | 0.003345 | FALSE | 1.097789 | FALSE | Neuron                 |
| CACAGAT db/db1  | db/db | 721  | 0.031973 | FALSE | 0.479515 | FALSE | Photoreceptor          |
| CACAGAT db/db1  | db/db | 2159 | 0.012052 | FALSE | 0.797464 | FALSE | Endothelia Capillary E |
| CACAGAT db/db1  | db/db | 2402 | 0.007833 | FALSE | 0.667508 | FALSE | Endothelia EC-C4       |
| CACAGAT db/db1  | db/db | 2304 | 0.025416 | FALSE | 1.194699 | FALSE | Endothelia Capillary E |
| CACAGAT db/db1  | db/db | 526  | 0.01981  | FALSE | 1.681761 | FALSE | Pericyte               |
| CACAGAT db/db1  | db/db | 4047 | 0.036232 | FALSE | 1.12486  | FALSE | Endothelia Capillary E |
| CACAGAT db/db1  | db/db | 3901 | 0.022455 | FALSE | 1.162176 | FALSE | Photoreceptor          |
| CACAGAT db/db1  | db/db | 7991 | 0.024971 | FALSE | 0.614471 | FALSE | Photoreceptor          |
| CACAGATT db/db1 | db/db | 615  | 0.064568 | FALSE | 3.327407 | FALSE | Muller cell            |
| CACAGATT db/db1 | db/db | 667  | 0.037564 | FALSE | 1.640923 | FALSE | Photoreceptor          |
| CACAGGC db/db1  | db/db | 600  | 0.095727 | FALSE | 1.183864 | FALSE | Photoreceptor          |
| CACAGGC db/db1  | db/db | 2507 | 0.034334 | FALSE | 1.248808 | FALSE | Photoreceptor          |
| CACAGGC db/db1  | db/db | 8464 | 0.021286 | FALSE | 0.580355 | FALSE | Photoreceptor          |
| CACAGGC db/db1  | db/db | 7627 | 0.137569 | TRUE  | 2.10306  | FALSE |                        |
| CACAGGC db/db1  | db/db | 1508 | 0.014711 | FALSE | 1.437585 | FALSE | Endothelia Capillary E |
| CACAGGC db/db1  | db/db | 2428 | 0.011561 | FALSE | 1.061699 | FALSE | Photoreceptor          |
| CACAGGC db/db1  | db/db | 4475 | 0.036232 | FALSE | 1.022243 | FALSE | Photoreceptor          |
| CACAGGC db/db1  | db/db | 1910 | 0.038953 | FALSE | 1.079059 | FALSE | Endothelia Venous EC   |
| CACAGGC db/db1  | db/db | 1181 | 0.015581 | FALSE | 1.601087 | FALSE | Endothelia Capillary E |
| CACAGGC db/db1  | db/db | 3049 | 0.018088 | FALSE | 1.051252 | FALSE | Endothelia Capillary E |
| CACAGGC db/db1  | db/db | 6149 | 0.030318 | FALSE | 0.764092 | FALSE | Photoreceptor          |
| CACAGGC db/db1  | db/db | 649  | 0.028754 | FALSE | 1.397637 | FALSE | Photoreceptor          |
| CACAGGC db/db1  | db/db | 1787 | 0.019455 | FALSE | 1.17492  | FALSE | Endothelia EC-C4       |
| CACAGGC db/db1  | db/db | 7179 | 0.029266 | FALSE | 0.432233 | FALSE | Photoreceptor          |

|          |        |       |      |          |       |          |       |                        |
|----------|--------|-------|------|----------|-------|----------|-------|------------------------|
| CACAGGC  | db/db1 | db/db | 4621 | 0.011805 | FALSE | 1.052132 | FALSE | Photoreceptor          |
| CACAGGC  | db/db1 | db/db | 519  | 0.016799 | FALSE | 2.594008 | FALSE | Muller cell            |
| CACAGGC  | db/db1 | db/db | 433  | 0.007058 | FALSE | 2.263617 | FALSE | Pericyte               |
| CACAGGC  | db/db1 | db/db | 1536 | 0.076994 | FALSE | 1.053123 | FALSE | Photoreceptor          |
| CACAGGC  | db/db1 | db/db | 1893 | 0.10565  | TRUE  | 1.700812 | FALSE |                        |
| CACAGGC  | db/db1 | db/db | 1225 | 0.065957 | FALSE | 1.139135 | FALSE | Photoreceptor          |
| CACATGA  | db/db1 | db/db | 4032 | 0.029787 | FALSE | 0.945549 | FALSE | Endothelia Venous EC   |
| CACATGA  | db/db1 | db/db | 2582 | 0.037564 | FALSE | 1.330459 | FALSE | Photoreceptor          |
| CACATGA  | db/db1 | db/db | 1870 | 0.128582 | TRUE  | 1.33301  | FALSE |                        |
| CACATGA  | db/db1 | db/db | 525  | 0.052669 | FALSE | 1.665552 | FALSE | Endothelia Capillary E |
| CACATGA  | db/db1 | db/db | 1051 | 0.024971 | FALSE | 1.033472 | FALSE | Photoreceptor          |
| CACCAAA  | db/db1 | db/db | 401  | 0.011561 | FALSE | 3.161759 | FALSE | Endothelia Capillary E |
| CACCAAA  | db/db1 | db/db | 2708 | 0.005264 | FALSE | 1.367435 | FALSE | Neuron                 |
| CACCAAA  | db/db1 | db/db | 723  | 0.042704 | FALSE | 2.170674 | FALSE | Photoreceptor          |
| CACCAAAC | db/db1 | db/db | 1463 | 0.024534 | FALSE | 0.649084 | FALSE | Photoreceptor          |
| CACCAAAC | db/db1 | db/db | 3109 | 0.016488 | FALSE | 0.971939 | FALSE | Endothelia Venous EC   |
| CACCAAAT | db/db1 | db/db | 4305 | 0.209157 | TRUE  | 2.782747 | FALSE |                        |
| CACCGTTA | db/db1 | db/db | 4122 | 0.019106 | FALSE | 0.337273 | FALSE | Photoreceptor          |
| CACCGTTA | db/db1 | db/db | 1468 | 0.008032 | FALSE | 0.763813 | FALSE | Endothelia EC-C4       |
| CACCGTTA | db/db1 | db/db | 3538 | 0.020908 | FALSE | 1.047958 | FALSE | Endothelia Venous EC   |
| CACCGTTC | db/db1 | db/db | 2553 | 0.039671 | FALSE | 0.87913  | FALSE | Photoreceptor          |
| CACCGTTC | db/db1 | db/db | 1970 | 0.068864 | FALSE | 0.756836 | FALSE | Photoreceptor          |
| CACCGTTC | db/db1 | db/db | 4489 | 0.047807 | FALSE | 1.151274 | FALSE | Photoreceptor          |
| CACCGTTT | db/db1 | db/db | 3908 | 0.022059 | FALSE | 0.915266 | FALSE | Photoreceptor          |
| CACGAATC | db/db1 | db/db | 4294 | 0.035586 | FALSE | 0.750938 | FALSE | Photoreceptor          |
| CACGAATC | db/db1 | db/db | 1875 | 0.028251 | FALSE | 1.338659 | FALSE | Microglia              |
| CACGAATC | db/db1 | db/db | 765  | 0.010157 | FALSE | 1.058431 | FALSE | Endothelia Aterial EC  |
| CACGAATC | db/db1 | db/db | 2569 | 0.009933 | FALSE | 1.110811 | FALSE | Photoreceptor          |
| CACGAATC | db/db1 | db/db | 484  | 0.022857 | FALSE | 1.011163 | FALSE | Photoreceptor          |
| CACGAATC | db/db1 | db/db | 2371 | 0.034954 | FALSE | 1.135828 | FALSE | Endothelia Venous EC   |
| CACGAATT | db/db1 | db/db | 1682 | 0.052669 | FALSE | 0.916593 | FALSE | Photoreceptor          |
| CACGGGT  | db/db1 | db/db | 1563 | 0.029787 | FALSE | 0.57607  | FALSE | Photoreceptor          |
| CACGGGT  | db/db1 | db/db | 635  | 0.100845 | TRUE  | 4.682274 | FALSE |                        |
| CACGGGT  | db/db1 | db/db | 403  | 0.038953 | FALSE | 1.876489 | FALSE | Photoreceptor          |
| CACGGGT  | db/db1 | db/db | 3136 | 0.025416 | FALSE | 1.229834 | FALSE | Endothelia Capillary E |
| CACGGGT  | db/db1 | db/db | 2992 | 0.013074 | FALSE | 1.044538 | FALSE | Endothelia Capillary E |
| CACGGGT  | db/db1 | db/db | 1609 | 0.004116 | FALSE | 1.43049  | FALSE | Neuron                 |
| CACGGGT  | db/db1 | db/db | 3240 | 0.028754 | FALSE | 0.825244 | FALSE | Photoreceptor          |
| CACGGGT  | db/db1 | db/db | 3595 | 0.026796 | FALSE | 0.969764 | FALSE | Endothelia Venous EC   |
| CACGGGT  | db/db1 | db/db | 1382 | 0.084562 | FALSE | 1.035378 | FALSE | Photoreceptor          |
| CACGGGT  | db/db1 | db/db | 1508 | 0.065957 | FALSE | 1.675432 | FALSE | Endothelia Capillary E |
| CACGTGG  | db/db1 | db/db | 991  | 0.013876 | FALSE | 2.09345  | FALSE | Pericyte               |
| CACGTGG  | db/db1 | db/db | 1745 | 0.028754 | FALSE | 2.414068 | FALSE | Muller cell            |
| CACGTGG  | db/db1 | db/db | 806  | 0.027273 | FALSE | 2.06197  | FALSE | Endothelia Capillary E |
| CACGTGG  | db/db1 | db/db | 2689 | 0.076994 | FALSE | 1.159745 | FALSE | Photoreceptor          |
| CACGTGG  | db/db1 | db/db | 7803 | 0.022059 | FALSE | 0.630389 | FALSE | Photoreceptor          |
| CACGTGG  | db/db1 | db/db | 3029 | 0.014429 | FALSE | 1.04321  | FALSE | Endothelia Venous EC   |

|                 |       |      |          |       |          |       |                        |
|-----------------|-------|------|----------|-------|----------|-------|------------------------|
| CACGTGGT db/db1 | db/db | 406  | 0.037564 | FALSE | 3.485306 | FALSE | Photoreceptor          |
| CACGTGGT db/db1 | db/db | 1611 | 0.073582 | FALSE | 1.608728 | FALSE | Photoreceptor          |
| CACGTGGT db/db1 | db/db | 554  | 0.042704 | FALSE | 3.034675 | FALSE | Muller cell            |
| CACGTTCA db/db1 | db/db | 3047 | 0.030859 | FALSE | 1.092422 | FALSE | Endothelia Capillary E |
| CACGTTCC db/db1 | db/db | 5159 | 0.031973 | FALSE | 0.653992 | FALSE | Photoreceptor          |
| CACGTTCC db/db1 | db/db | 2294 | 0.059406 | FALSE | 1.047696 | FALSE | Photoreceptor          |
| CACGTTCC db/db1 | db/db | 1322 | 0.082569 | FALSE | 8.401453 | TRUE  |                        |
| CACGTTCC db/db1 | db/db | 1684 | 0.042704 | FALSE | 0.735584 | FALSE | Microglia              |
| CACTAAGT db/db1 | db/db | 671  | 0.025416 | FALSE | 1.779621 | FALSE | Photoreceptor          |
| CACTAAGT db/db1 | db/db | 3135 | 0.030318 | FALSE | 0.849614 | FALSE | Photoreceptor          |
| CACTAAGT db/db1 | db/db | 477  | 0.030318 | FALSE | 3.581778 | FALSE | Muller cell            |
| CACTAAGC db/db1 | db/db | 8319 | 0.15354  | TRUE  | 2.349401 | FALSE |                        |
| CACTAAGC db/db1 | db/db | 4028 | 0.063221 | FALSE | 1.04948  | FALSE | Endothelia Venous EC   |
| CACTAAGC db/db1 | db/db | 653  | 0.138889 | TRUE  | 23.35766 | TRUE  |                        |
| CACTAAGC db/db1 | db/db | 459  | 0.128582 | TRUE  | 2.970297 | FALSE |                        |
| CACTAAGT db/db1 | db/db | 400  | 0.131994 | TRUE  | 2.840909 | FALSE |                        |
| CACTAAGT db/db1 | db/db | 587  | 0.045165 | FALSE | 3.821354 | FALSE | Muller cell            |
| CACTAAGT db/db1 | db/db | 595  | 0.022857 | FALSE | 2.338101 | FALSE | Endothelia Capillary E |
| CACTGAAT db/db1 | db/db | 396  | 0.265464 | TRUE  | 7.976654 | TRUE  |                        |
| CACTGAAC db/db1 | db/db | 1027 | 0.054795 | FALSE | 0.664235 | FALSE | Photoreceptor          |
| CACTGAAC db/db1 | db/db | 833  | 0.080645 | FALSE | 2.895454 | FALSE | Photoreceptor          |
| CACTGAAC db/db1 | db/db | 2038 | 0.014151 | FALSE | 1.29789  | FALSE | Endothelia Venous EC   |
| CACTGAAT db/db1 | db/db | 2294 | 0.029266 | FALSE | 0.759962 | FALSE | Endothelia EC-C4       |
| CACTGAAT db/db1 | db/db | 1142 | 0.018761 | FALSE | 2.192995 | FALSE | Neuron                 |
| CACTGAAT db/db1 | db/db | 793  | 0.05065  | FALSE | 1.468081 | FALSE | Photoreceptor          |
| CACTGAAT db/db1 | db/db | 565  | 0.044326 | FALSE | 1.829374 | FALSE | Photoreceptor          |
| CACTGGGT db/db1 | db/db | 417  | 0.034954 | FALSE | 3.945679 | FALSE | Photoreceptor          |
| CACTGGGT db/db1 | db/db | 7879 | 0.016799 | FALSE | 0.511461 | FALSE | Photoreceptor          |
| CACTGGGT db/db1 | db/db | 4790 | 0.026328 | FALSE | 0.632704 | FALSE | Photoreceptor          |
| CACTGGGT db/db1 | db/db | 894  | 0.039671 | FALSE | 1.762595 | FALSE | Photoreceptor          |
| CACTGGGT db/db1 | db/db | 836  | 0.071958 | FALSE | 8.669354 | TRUE  |                        |
| CACTGGGT db/db1 | db/db | 1629 | 0.038953 | FALSE | 1.36891  | FALSE | Endothelia Capillary E |
| CACTGGGT db/db1 | db/db | 1108 | 0.122691 | TRUE  | 18.63098 | TRUE  |                        |
| CACTGGGT db/db1 | db/db | 2658 | 0.014429 | FALSE | 0.627086 | FALSE | Photoreceptor          |
| CACTGGGT db/db1 | db/db | 5142 | 0.020536 | FALSE | 0.687864 | FALSE | Endothelia EC-C4       |
| CACTGGGT db/db1 | db/db | 977  | 0.075259 | FALSE | 2.487799 | FALSE | Muller cell            |
| CACTGGGT db/db1 | db/db | 3241 | 0.028754 | FALSE | 0.733106 | FALSE | Photoreceptor          |
| CACTGGGT db/db1 | db/db | 306  | 0.044326 | FALSE | 3.746452 | FALSE | Muller cell            |
| CACTGGGT db/db1 | db/db | 4290 | 0.028754 | FALSE | 1.120996 | FALSE | Photoreceptor          |
| CACTGTCA db/db1 | db/db | 2852 | 0.070386 | FALSE | 0.921264 | FALSE | Photoreceptor          |
| CACTGTCA db/db1 | db/db | 510  | 0.025868 | FALSE | 2.467285 | FALSE | Muller cell            |
| CACTGTCC db/db1 | db/db | 1297 | 0.037564 | FALSE | 0.808193 | FALSE | Photoreceptor          |
| CACTGTCC db/db1 | db/db | 1232 | 0.059406 | FALSE | 1.33783  | FALSE | Photoreceptor          |
| CACTGTCC db/db1 | db/db | 2321 | 0.029787 | FALSE | 0.483043 | FALSE | Photoreceptor          |
| CACTGTCC db/db1 | db/db | 6302 | 0.17103  | TRUE  | 1.126081 | FALSE |                        |
| CACTGTCT db/db1 | db/db | 549  | 0.03313  | FALSE | 2.384439 | FALSE | Microglia              |
| CACTGTCT db/db1 | db/db | 2034 | 0.064568 | FALSE | 0.950414 | FALSE | Photoreceptor          |



|                 |       |      |          |       |          |       |                        |
|-----------------|-------|------|----------|-------|----------|-------|------------------------|
| CACTTCGA db/db1 | db/db | 1336 | 0.091004 | FALSE | 7.870968 | TRUE  |                        |
| CACTTCGC db/db1 | db/db | 2116 | 0.067388 | FALSE | 1.623119 | FALSE | Photoreceptor          |
| CACTTCGT db/db1 | db/db | 8432 | 0.026328 | FALSE | 0.409318 | FALSE | Photoreceptor          |
| CAGAGCC db/db1  | db/db | 3738 | 0.03313  | FALSE | 0.716069 | FALSE | Photoreceptor          |
| CAGAGCC db/db1  | db/db | 696  | 0.011319 | FALSE | 1.671846 | FALSE | Endothelia Capillary E |
| CAGAGCC db/db1  | db/db | 3914 | 0.028251 | FALSE | 0.882483 | FALSE | Photoreceptor          |
| CAGATAC db/db1  | db/db | 4902 | 0.17103  | TRUE  | 2.512904 | FALSE |                        |
| CAGATAC db/db1  | db/db | 4614 | 0.026328 | FALSE | 1.271451 | FALSE | Photoreceptor          |
| CAGATACC db/db1 | db/db | 1231 | 0.022455 | FALSE | 1.48092  | FALSE | Photoreceptor          |
| CAGATACT db/db1 | db/db | 785  | 0.041154 | FALSE | 1.389879 | FALSE | Photoreceptor          |
| CAGATCA db/db1  | db/db | 1113 | 0.034954 | FALSE | 1.570793 | FALSE | Photoreceptor          |
| CAGATCA db/db1  | db/db | 3994 | 0.053718 | FALSE | 0.940744 | FALSE | Photoreceptor          |
| CAGATCA db/db1  | db/db | 4870 | 0.035586 | FALSE | 0.679219 | FALSE | Photoreceptor          |
| CAGATCAC db/db1 | db/db | 4206 | 0.055901 | FALSE | 1.042281 | FALSE | Photoreceptor          |
| CAGATCAC db/db1 | db/db | 578  | 0.033726 | FALSE | 0.322693 | FALSE | Photoreceptor          |
| CAGATCAC db/db1 | db/db | 1196 | 0.012303 | FALSE | 0.883318 | FALSE | Photoreceptor          |
| CAGATCAC db/db1 | db/db | 2169 | 0.018088 | FALSE | 1.036352 | FALSE | Pericyte               |
| CAGATCAT db/db1 | db/db | 4276 | 0.030318 | FALSE | 0.746667 | FALSE | Photoreceptor          |
| CAGATCAT db/db1 | db/db | 979  | 0.034954 | FALSE | 0.828516 | FALSE | Photoreceptor          |
| CAGATCAT db/db1 | db/db | 793  | 0.064568 | FALSE | 1.407458 | FALSE | Photoreceptor          |
| CAGATTG db/db1  | db/db | 3556 | 0.137569 | TRUE  | 1.971043 | FALSE |                        |
| CAGATTG db/db1  | db/db | 4113 | 0.064568 | FALSE | 0.955304 | FALSE | Endothelia Venous EC   |
| CAGATTGC db/db1 | db/db | 3378 | 0.020908 | FALSE | 0.463465 | FALSE | Photoreceptor          |
| CAGATTGC db/db1 | db/db | 1790 | 0.009063 | FALSE | 0.759376 | FALSE | Endothelia EC-C4       |
| CAGATTGC db/db1 | db/db | 3790 | 0.017758 | FALSE | 0.592138 | FALSE | Photoreceptor          |
| CAGATTGC db/db1 | db/db | 2332 | 0.023682 | FALSE | 0.962847 | FALSE | Endothelia EC-C4       |
| CAGCAATC db/db1 | db/db | 3351 | 0.038953 | FALSE | 0.998776 | FALSE | Endothelia Venous EC   |
| CAGCAATC db/db1 | db/db | 1732 | 0.026328 | FALSE | 0.989094 | FALSE | Photoreceptor          |
| CAGCAATC db/db1 | db/db | 630  | 0.061912 | FALSE | 2.729355 | FALSE | Muller cell            |
| CAGCAATT db/db1 | db/db | 465  | 0.052669 | FALSE | 1.075776 | FALSE | Photoreceptor          |
| CAGCAATT db/db1 | db/db | 1589 | 0.017114 | FALSE | 0.931941 | FALSE | Endothelia Capillary E |
| CAGCAATT db/db1 | db/db | 849  | 0.041154 | FALSE | 1.317582 | FALSE | Endothelia Capillary E |
| CAGCACG db/db1  | db/db | 474  | 0.038251 | FALSE | 2.005919 | FALSE | Microglia              |
| CAGCACG db/db1  | db/db | 2162 | 0.036232 | FALSE | 0.535386 | FALSE | Photoreceptor          |
| CAGCACG db/db1  | db/db | 2116 | 0.010614 | FALSE | 1.126619 | FALSE | Endothelia Venous EC   |
| CAGCACG db/db1  | db/db | 1484 | 0.015879 | FALSE | 0.824926 | FALSE | Photoreceptor          |
| CAGCACG db/db1  | db/db | 1849 | 0.005095 | FALSE | 0.613953 | FALSE | Neuron                 |
| CAGCACG db/db1  | db/db | 2083 | 0.031973 | FALSE | 1.073801 | FALSE | Pericyte               |
| CAGCACG db/db1  | db/db | 2005 | 0.011805 | FALSE | 0.96322  | FALSE | Endothelia EC-C4       |
| CAGCACG db/db1  | db/db | 2916 | 0.032546 | FALSE | 1.032947 | FALSE | Endothelia Capillary E |
| CAGCACG db/db1  | db/db | 8505 | 0.023266 | FALSE | 0.552455 | FALSE | Photoreceptor          |
| CAGCACG db/db1  | db/db | 1588 | 0.265464 | TRUE  | 2.804831 | FALSE |                        |
| CAGCACG db/db1  | db/db | 1401 | 0.008438 | FALSE | 1.387929 | FALSE | Endothelia Capillary E |
| CAGCAGC db/db1  | db/db | 6016 | 0.041154 | FALSE | 0.718538 | FALSE | Endothelia Venous EC   |
| CAGCAGC db/db1  | db/db | 4384 | 0.026328 | FALSE | 0.861802 | FALSE | Endothelia EC-C4       |
| CAGCAGC db/db1  | db/db | 3832 | 0.022059 | FALSE | 0.900045 | FALSE | Endothelia Venous EC   |
| CAGCAGC db/db1  | db/db | 453  | 0.034334 | FALSE | 3.186209 | FALSE | Muller cell            |

|                |       |      |          |       |          |       |                        |
|----------------|-------|------|----------|-------|----------|-------|------------------------|
| CAGCAGC(db/db1 | db/db | 3472 | 0.018088 | FALSE | 0.894278 | FALSE | Endothelia EC-C4       |
| CAGCAGC(db/db1 | db/db | 1598 | 0.070386 | FALSE | 1.239243 | FALSE | Photoreceptor          |
| CAGCAGC(db/db1 | db/db | 1261 | 0.109954 | TRUE  | 1.781857 | FALSE |                        |
| CAGCAGCdb/db1  | db/db | 1321 | 0.017114 | FALSE | 1.361739 | FALSE | Endothelia Capillary E |
| CAGCAGCdb/db1  | db/db | 2884 | 0.034334 | FALSE | 0.97366  | FALSE | Endothelia EC-C4       |
| CAGCAGCdb/db1  | db/db | 3642 | 0.008032 | FALSE | 0.637521 | FALSE | Endothelia Venous EC   |
| CAGCCAGdb/db1  | db/db | 1954 | 0.093319 | FALSE | 1.559596 | FALSE | Endothelia Capillary E |
| CAGCCAG(db/db1 | db/db | 1279 | 0.065957 | FALSE | 0.629518 | FALSE | Photoreceptor          |
| CAGCCAG(db/db1 | db/db | 2103 | 0.025868 | FALSE | 1.119559 | FALSE | Photoreceptor          |
| CAGCCAG(db/db1 | db/db | 401  | 0.030859 | FALSE | 2.475999 | FALSE | Pericyte               |
| CAGCCAG(db/db1 | db/db | 811  | 0.010614 | FALSE | 2.02085  | FALSE | Endothelia Capillary E |
| CAGCCAG(db/db1 | db/db | 2243 | 0.035586 | FALSE | 1.086236 | FALSE | Photoreceptor          |
| CAGCCAGdb/db1  | db/db | 7203 | 0.014997 | FALSE | 0.524949 | FALSE | Photoreceptor          |
| CAGCCAGdb/db1  | db/db | 4013 | 0.084562 | FALSE | 1.209823 | FALSE | Photoreceptor          |
| CAGCCAGdb/db1  | db/db | 1541 | 0.006137 | FALSE | 0.911789 | FALSE | Pericyte               |
| CAGCCAGdb/db1  | db/db | 1345 | 0.014711 | FALSE | 1.322654 | FALSE | Endothelia Capillary E |
| CAGCCAGdb/db1  | db/db | 6854 | 0.018422 | FALSE | 0.811233 | FALSE | Photoreceptor          |
| CAGCGTGdb/db1  | db/db | 925  | 0.053718 | FALSE | 1.660807 | FALSE | Endothelia EC-C4       |
| CAGCGTG(db/db1 | db/db | 1214 | 0.071958 | FALSE | 1.66522  | FALSE | Photoreceptor          |
| CAGCGTG(db/db1 | db/db | 3304 | 0.061912 | FALSE | 0.915075 | FALSE | Endothelia Venous EC   |
| CAGCGTG(db/db1 | db/db | 529  | 0.044326 | FALSE | 1.69472  | FALSE | Photoreceptor          |
| CAGCGTGdb/db1  | db/db | 8753 | 0.016181 | FALSE | 0.432776 | FALSE | Photoreceptor          |
| CAGCGTGdb/db1  | db/db | 1804 | 0.150727 | TRUE  | 2.364532 | FALSE |                        |
| CAGGCCAdb/db1  | db/db | 6813 | 0.026796 | FALSE | 0.534486 | FALSE | Photoreceptor          |
| CAGGCCAdb/db1  | db/db | 421  | 0.033726 | FALSE | 0.977215 | FALSE | Photoreceptor          |
| CAGGCCAdb/db1  | db/db | 2166 | 0.049679 | FALSE | 0.757625 | FALSE | Photoreceptor          |
| CAGGCCA(db/db1 | db/db | 1090 | 0.026796 | FALSE | 1.201903 | FALSE | Endothelia EC-C4       |
| CAGGCCA(db/db1 | db/db | 530  | 0.042704 | FALSE | 1.360141 | FALSE | Photoreceptor          |
| CAGGCCA(db/db1 | db/db | 5047 | 0.022059 | FALSE | 0.878307 | FALSE | Photoreceptor          |
| CAGGCCA(db/db1 | db/db | 1418 | 0.055901 | FALSE | 1.135838 | FALSE | Photoreceptor          |
| CAGGCCA(db/db1 | db/db | 1069 | 0.018761 | FALSE | 0.393716 | FALSE | Photoreceptor          |
| CAGGCCAdb/db1  | db/db | 4854 | 0.016799 | FALSE | 0.461736 | FALSE | Photoreceptor          |
| CAGGGCTdb/db1  | db/db | 2726 | 0.013876 | FALSE | 1.137879 | FALSE | Endothelia Capillary E |
| CAGGGCTdb/db1  | db/db | 1921 | 0.045165 | FALSE | 1.277621 | FALSE | Photoreceptor          |
| CAGGGCTdb/db1  | db/db | 637  | 0.093319 | FALSE | 0.921415 | FALSE | Photoreceptor          |
| CAGGGCTdb/db1  | db/db | 1247 | 0.009493 | FALSE | 1.20778  | FALSE | Endothelia EC-C4       |
| CAGGGCT(db/db1 | db/db | 399  | 0.023682 | FALSE | 2.653407 | FALSE | Photoreceptor          |
| CAGGGCT(db/db1 | db/db | 379  | 0.112477 | TRUE  | 14.28572 | TRUE  |                        |
| CAGGGCT(db/db1 | db/db | 3183 | 0.022455 | FALSE | 1.205505 | FALSE | Endothelia Capillary E |
| CAGGGCT(db/db1 | db/db | 1071 | 0.015581 | FALSE | 1.322048 | FALSE | Endothelia Capillary E |
| CAGGGCTdb/db1  | db/db | 1771 | 0.098234 | FALSE | 1.40259  | FALSE | Photoreceptor          |
| CAGGGCTdb/db1  | db/db | 821  | 0.053718 | FALSE | 2.217581 | FALSE | Photoreceptor          |
| CAGGTATdb/db1  | db/db | 607  | 0.018422 | FALSE | 0.947685 | FALSE | Photoreceptor          |
| CAGGTATdb/db1  | db/db | 1380 | 0.035586 | FALSE | 2.951163 | FALSE | Muller cell            |
| CAGGTATdb/db1  | db/db | 484  | 0.019106 | FALSE | 3.055067 | FALSE | Photoreceptor          |
| CAGGTATCdb/db1 | db/db | 1445 | 0.057037 | FALSE | 1.257067 | FALSE | Endothelia Capillary E |
| CAGGTATdb/db1  | db/db | 531  | 0.038953 | FALSE | 1.402158 | FALSE | Photoreceptor          |

|                 |       |      |          |       |          |       |                         |
|-----------------|-------|------|----------|-------|----------|-------|-------------------------|
| CAGGTATT db/db1 | db/db | 4371 | 0.036232 | FALSE | 0.904142 | FALSE | Endothelia Venous EC    |
| CAGGTATT db/db1 | db/db | 649  | 0.057037 | FALSE | 2.84075  | FALSE | Endothelia Capillary EC |
| CAGGTATT db/db1 | db/db | 1356 | 0.093319 | FALSE | 1.306805 | FALSE | Photoreceptor           |
| CAGTGCG db/db1  | db/db | 7661 | 0.028754 | FALSE | 0.682708 | FALSE | Photoreceptor           |
| CAGTGCG db/db1  | db/db | 1858 | 0.022857 | FALSE | 0.902338 | FALSE | Photoreceptor           |
| CAGTGCG db/db1  | db/db | 505  | 0.041154 | FALSE | 1.091953 | FALSE | Photoreceptor           |
| CAGTGCG db/db1  | db/db | 6320 | 0.012814 | FALSE | 0.543635 | FALSE | Photoreceptor           |
| CAGTGCG db/db1  | db/db | 1772 | 0.137569 | TRUE  | 1.851852 | FALSE |                         |
| CAGTGCG db/db1  | db/db | 1724 | 0.024534 | FALSE | 1.205623 | FALSE | Endothelia Capillary EC |
| CAGTGCG db/db1  | db/db | 439  | 0.017114 | FALSE | 0.709421 | FALSE | Photoreceptor           |
| CAGTTAG db/db1  | db/db | 2185 | 0.030859 | FALSE | 0.784101 | FALSE | Photoreceptor           |
| CAGTTAG db/db1  | db/db | 1088 | 0.091004 | FALSE | 1.240863 | FALSE | Photoreceptor           |
| CAGTTAG db/db1  | db/db | 730  | 0.095727 | FALSE | 1.21176  | FALSE | Photoreceptor           |
| CAGTTAG db/db1  | db/db | 2534 | 0.025868 | FALSE | 1.137071 | FALSE | Endothelia Capillary EC |
| CAGTTAG db/db1  | db/db | 2667 | 0.010614 | FALSE | 0.647163 | FALSE | Endothelia EC-C4        |
| CAGTTAG db/db1  | db/db | 857  | 0.054795 | FALSE | 1.123309 | FALSE | Muller cell             |
| CAGTTAG db/db1  | db/db | 1861 | 0.023682 | FALSE | 1.288732 | FALSE | Neuron                  |
| CAGTTAG db/db1  | db/db | 1915 | 0.020536 | FALSE | 1.306475 | FALSE | Endothelia Capillary EC |
| CAGTTAG db/db1  | db/db | 2486 | 0.024534 | FALSE | 0.86373  | FALSE | Photoreceptor           |
| CAGTTAG db/db1  | db/db | 1129 | 0.014997 | FALSE | 1.076893 | FALSE | Endothelia Capillary EC |
| CAGTTCCA db/db1 | db/db | 783  | 0.048732 | FALSE | 1.255628 | FALSE | Photoreceptor           |
| CAGTTCCA db/db1 | db/db | 2476 | 0.018088 | FALSE | 1.274316 | FALSE | Pericyte                |
| CAGTTCCA db/db1 | db/db | 4953 | 0.025416 | FALSE | 0.672201 | FALSE | Photoreceptor           |
| CAGTTCCC db/db1 | db/db | 1769 | 0.014151 | FALSE | 1.501745 | FALSE | Endothelia Capillary EC |
| CAGTTCCC db/db1 | db/db | 2160 | 0.057037 | FALSE | 1.123151 | FALSE | Pericyte                |
| CAGTTCCC db/db1 | db/db | 2635 | 0.044326 | FALSE | 0.87584  | FALSE | Photoreceptor           |
| CAGTTCCT db/db1 | db/db | 3134 | 0.049679 | FALSE | 0.451595 | FALSE | Photoreceptor           |
| CATAAGC db/db1  | db/db | 2629 | 0.020171 | FALSE | 1.060234 | FALSE | Endothelia Capillary EC |
| CATAAGC db/db1  | db/db | 370  | 0.045165 | FALSE | 36.93587 | TRUE  |                         |
| CATAAGCC db/db1 | db/db | 905  | 0.055901 | FALSE | 2.186334 | FALSE | Photoreceptor           |
| CATAAGCC db/db1 | db/db | 5056 | 0.131994 | TRUE  | 1.918596 | FALSE |                         |
| CATAAGCC db/db1 | db/db | 1187 | 0.037564 | FALSE | 1.753688 | FALSE | Photoreceptor           |
| CATAAGCC db/db1 | db/db | 575  | 0.080645 | FALSE | 1.201704 | FALSE | Photoreceptor           |
| CATAAGCT db/db1 | db/db | 803  | 0.061912 | FALSE | 1.705321 | FALSE | Photoreceptor           |
| CATACAG db/db1  | db/db | 1808 | 0.014997 | FALSE | 1.267615 | FALSE | Endothelia Capillary EC |
| CATACAG db/db1  | db/db | 2163 | 0.029787 | FALSE | 1.193797 | FALSE | Endothelia EC-C4        |
| CATACAG db/db1  | db/db | 757  | 0.027273 | FALSE | 0.771851 | FALSE | Photoreceptor           |
| CATACAG db/db1  | db/db | 1208 | 0.024534 | FALSE | 2.262103 | FALSE | Photoreceptor           |
| CATACAG db/db1  | db/db | 6901 | 0.051646 | FALSE | 0.784658 | FALSE | Neuron                  |
| CATACAG db/db1  | db/db | 1268 | 0.011319 | FALSE | 1.374051 | FALSE | Endothelia Capillary EC |
| CATACAGT db/db1 | db/db | 504  | 0.048732 | FALSE | 2.627923 | FALSE | Muller cell             |
| CATACAGT db/db1 | db/db | 7008 | 0.020908 | FALSE | 0.555616 | FALSE | Photoreceptor           |
| CATACCCC db/db1 | db/db | 2272 | 0.122691 | TRUE  | 7.598227 | TRUE  |                         |
| CATACCCC db/db1 | db/db | 7919 | 0.017434 | FALSE | 0.16667  | FALSE | Photoreceptor           |
| CATACCCT db/db1 | db/db | 2201 | 0.106646 | TRUE  | 0.831537 | FALSE |                         |
| CATACCCT db/db1 | db/db | 1613 | 0.009493 | FALSE | 0.785855 | FALSE | Neuron                  |
| CATACTTC db/db1 | db/db | 1279 | 0.039671 | FALSE | 1.385095 | FALSE | Photoreceptor           |

|                 |       |      |          |       |          |       |                        |
|-----------------|-------|------|----------|-------|----------|-------|------------------------|
| CATACTTC db/db1 | db/db | 484  | 0.031973 | FALSE | 1.560214 | FALSE | Muller cell            |
| CATACTTG db/db1 | db/db | 3327 | 0.014429 | FALSE | 0.911594 | FALSE | Endothelia Venous EC   |
| CATACTTG db/db1 | db/db | 642  | 0.022059 | FALSE | 1.651857 | FALSE | Muller cell            |
| CATACTTG db/db1 | db/db | 2830 | 0.013876 | FALSE | 1.201198 | FALSE | Photoreceptor          |
| CATACTTT db/db1 | db/db | 1101 | 0.029266 | FALSE | 1.649513 | FALSE | Endothelia Capillary E |
| CATAGAC db/db1  | db/db | 417  | 0.063221 | FALSE | 2.357414 | FALSE | Endothelia Capillary E |
| CATAGACC db/db1 | db/db | 2158 | 0.033726 | FALSE | 1.584609 | FALSE | Photoreceptor          |
| CATAGACC db/db1 | db/db | 655  | 0.041154 | FALSE | 1.517834 | FALSE | Muller cell            |
| CATAGACC db/db1 | db/db | 7612 | 0.119124 | TRUE  | 2.259851 | FALSE |                        |
| CATAGACC db/db1 | db/db | 1350 | 0.082569 | FALSE | 1.738385 | FALSE | Photoreceptor          |
| CATAGACC db/db1 | db/db | 3513 | 0.015287 | FALSE | 0.902408 | FALSE | Endothelia Aterial EC  |
| CATAGACT db/db1 | db/db | 2396 | 0.004598 | FALSE | 0.999383 | FALSE | Neuron                 |
| CATAGACT db/db1 | db/db | 1450 | 0.020171 | FALSE | 0.958806 | FALSE | Endothelia EC-C4       |
| CATCAAG db/db1  | db/db | 3666 | 0.028754 | FALSE | 1.158534 | FALSE | Photoreceptor          |
| CATCAAG db/db1  | db/db | 1018 | 0.043505 | FALSE | 1.429597 | FALSE | Neuron                 |
| CATCAAG db/db1  | db/db | 1226 | 0.014429 | FALSE | 1.509291 | FALSE | Pericyte               |
| CATCAAGC db/db1 | db/db | 528  | 0.025868 | FALSE | 1.899699 | FALSE | Endothelia Capillary E |
| CATCAAGC db/db1 | db/db | 852  | 0.054795 | FALSE | 1.109181 | FALSE | Photoreceptor          |
| CATCAAGC db/db1 | db/db | 525  | 0.014151 | FALSE | 2.60594  | FALSE | Photoreceptor          |
| CATCAAGC db/db1 | db/db | 1545 | 0.020908 | FALSE | 1.041032 | FALSE | Photoreceptor          |
| CATCAAGC db/db1 | db/db | 1352 | 0.008032 | FALSE | 1.617559 | FALSE | Endothelia Capillary E |
| CATCAAGC db/db1 | db/db | 392  | 0.034334 | FALSE | 1.84292  | FALSE | Microglia              |
| CATCAAGT db/db1 | db/db | 610  | 0.122691 | TRUE  | 3.088392 | FALSE |                        |
| CATCCACA db/db1 | db/db | 1661 | 0.098234 | FALSE | 0.765293 | FALSE | Endothelia EC-C4       |
| CATCCACA db/db1 | db/db | 1536 | 0.008234 | FALSE | 1.173865 | FALSE | Endothelia Capillary E |
| CATCCACA db/db1 | db/db | 3357 | 0.046906 | FALSE | 1.458362 | FALSE | Muller cell            |
| CATCCACA db/db1 | db/db | 2683 | 0.143776 | TRUE  | 2.762696 | FALSE |                        |
| CATCCACA db/db1 | db/db | 1433 | 0.03313  | FALSE | 1.284836 | FALSE | Endothelia Capillary E |
| CATCCACA db/db1 | db/db | 1752 | 0.022857 | FALSE | 1.321777 | FALSE | Endothelia Aterial EC  |
| CATCCACC db/db1 | db/db | 747  | 0.036891 | FALSE | 2.460702 | FALSE | Endothelia Capillary E |
| CATCCACG db/db1 | db/db | 3188 | 0.010157 | FALSE | 1.081678 | FALSE | Endothelia Venous EC   |
| CATCCACG db/db1 | db/db | 644  | 0.039671 | FALSE | 1.63658  | FALSE | Neuron                 |
| CATCCACT db/db1 | db/db | 3391 | 0.024971 | FALSE | 0.720325 | FALSE | Photoreceptor          |
| CATCCACT db/db1 | db/db | 1566 | 0.011081 | FALSE | 1.407577 | FALSE | Endothelia Capillary E |
| CATCCACT db/db1 | db/db | 5279 | 0.148377 | TRUE  | 1.061441 | FALSE |                        |
| CATCCCAA db/db1 | db/db | 461  | 0.014997 | FALSE | 0.961036 | FALSE | Photoreceptor          |
| CATCCCAA db/db1 | db/db | 3225 | 0.032546 | FALSE | 0.783783 | FALSE | Photoreceptor          |
| CATCCCAA db/db1 | db/db | 595  | 0.019106 | FALSE | 2.622276 | FALSE | Endothelia Capillary E |
| CATCCCAC db/db1 | db/db | 3570 | 0.014151 | FALSE | 0.896379 | FALSE | Endothelia Capillary E |
| CATCCCAC db/db1 | db/db | 3500 | 0.022857 | FALSE | 0.645112 | FALSE | Photoreceptor          |
| CATCCCAC db/db1 | db/db | 791  | 0.029266 | FALSE | 3.451551 | FALSE | Muller cell            |
| CATCCCAC db/db1 | db/db | 3007 | 0.020908 | FALSE | 0.51947  | FALSE | Photoreceptor          |
| CATCCCAG db/db1 | db/db | 1106 | 0.031411 | FALSE | 1.08525  | FALSE | Endothelia Capillary E |
| CATCCCAG db/db1 | db/db | 1662 | 0.03313  | FALSE | 0.533925 | FALSE | Photoreceptor          |
| CATCCCAG db/db1 | db/db | 1354 | 0.184701 | TRUE  | 4.22596  | FALSE |                        |
| CATCCCAT db/db1 | db/db | 2921 | 0.023682 | FALSE | 1.102755 | FALSE | Endothelia Capillary E |
| CATCCCAT db/db1 | db/db | 2354 | 0.091004 | FALSE | 1.60225  | FALSE | Photoreceptor          |

|                 |       |      |          |       |          |       |                        |
|-----------------|-------|------|----------|-------|----------|-------|------------------------|
| CATCCGTA db/db1 | db/db | 802  | 0.027758 | FALSE | 0.703558 | FALSE | Photoreceptor          |
| CATCCGTA db/db1 | db/db | 2436 | 0.032546 | FALSE | 1.065659 | FALSE | Photoreceptor          |
| CATCCGTC db/db1 | db/db | 502  | 0.012557 | FALSE | 0.626589 | FALSE | Photoreceptor          |
| CATCCGTC db/db1 | db/db | 474  | 0.040404 | FALSE | 3.07697  | FALSE | Muller cell            |
| CATCCGTC db/db1 | db/db | 7599 | 0.011319 | FALSE | 0.412261 | FALSE | Photoreceptor          |
| CATCCGTC db/db1 | db/db | 466  | 0.063221 | FALSE | 0.945947 | FALSE | Photoreceptor          |
| CATCCGTC db/db1 | db/db | 334  | 0.054795 | FALSE | 23.84769 | TRUE  |                        |
| CATCCGTC db/db1 | db/db | 5188 | 0.014711 | FALSE | 0.828344 | FALSE | Endothelia EC-C4       |
| CATCCGTC db/db1 | db/db | 3927 | 0.131994 | TRUE  | 1.653171 | FALSE |                        |
| CATCCGTC db/db1 | db/db | 8513 | 0.014151 | FALSE | 0.160079 | FALSE | Photoreceptor          |
| CATCCGTT db/db1 | db/db | 1489 | 0.071958 | FALSE | 1.220744 | FALSE | Photoreceptor          |
| CATCGCTA db/db1 | db/db | 8320 | 0.060641 | FALSE | 0.580645 | FALSE | Photoreceptor          |
| CATCGCTC db/db1 | db/db | 1243 | 0.053718 | FALSE | 0.969124 | FALSE | Photoreceptor          |
| CATCGCTC db/db1 | db/db | 417  | 0.037564 | FALSE | 1.831644 | FALSE | Endothelia Capillary E |
| CATCGGG db/db1  | db/db | 600  | 0.095727 | FALSE | 3.417499 | FALSE | Muller cell            |
| CATCGGG db/db1  | db/db | 980  | 0.028251 | FALSE | 1.247105 | FALSE | Photoreceptor          |
| CATCGGG db/db1  | db/db | 3266 | 0.009277 | FALSE | 0.975487 | FALSE | Endothelia Capillary E |
| CATCGGG db/db1  | db/db | 3958 | 0.021286 | FALSE | 0.930316 | FALSE | Endothelia EC-C4       |
| CATCGGG db/db1  | db/db | 8518 | 0.014997 | FALSE | 0.395882 | FALSE | Photoreceptor          |
| CATCGTCA db/db1 | db/db | 1740 | 0.018088 | FALSE | 1.330583 | FALSE | Endothelia Capillary E |
| CATCGTCA db/db1 | db/db | 2568 | 0.022857 | FALSE | 0.789669 | FALSE | Photoreceptor          |
| CATCGTCA db/db1 | db/db | 3733 | 0.016181 | FALSE | 0.91752  | FALSE | Endothelia Venous EC   |
| CATCGTCC db/db1 | db/db | 4523 | 0.143501 | TRUE  | 1.71749  | FALSE |                        |
| CATCGTCC db/db1 | db/db | 3954 | 0.017434 | FALSE | 0.710462 | FALSE | Endothelia EC-C4       |
| CATCGTCC db/db1 | db/db | 911  | 0.018761 | FALSE | 1.316133 | FALSE | Endothelia Venous EC   |
| CATCGTCT db/db1 | db/db | 3060 | 0.017434 | FALSE | 1.085596 | FALSE | Endothelia Capillary E |
| CATCGTCT db/db1 | db/db | 2384 | 0.039671 | FALSE | 1.193596 | FALSE | Photoreceptor          |
| CATCGTCT db/db1 | db/db | 654  | 0.022059 | FALSE | 0.660106 | FALSE | Photoreceptor          |
| CATGAGTC db/db1 | db/db | 555  | 0.082569 | FALSE | 5.166051 | TRUE  |                        |
| CATGAGTC db/db1 | db/db | 698  | 0.046906 | FALSE | 1.091822 | FALSE | Photoreceptor          |
| CATGAGTT db/db1 | db/db | 441  | 0.036232 | FALSE | 0.705679 | FALSE | Photoreceptor          |
| CATGAGTT db/db1 | db/db | 1759 | 0.025868 | FALSE | 1.144984 | FALSE | Microglia              |
| CATGAGTT db/db1 | db/db | 1745 | 0.028251 | FALSE | 1.037046 | FALSE | Endothelia EC-C4       |
| CATGCAA db/db1  | db/db | 1985 | 0.122388 | TRUE  | 2.361148 | FALSE |                        |
| CATGCAA db/db1  | db/db | 1479 | 0.016799 | FALSE | 0.818358 | FALSE | Endothelia Capillary E |
| CATGCAA db/db1  | db/db | 3833 | 0.046906 | FALSE | 0.805134 | FALSE | Photoreceptor          |
| CATGCAAC db/db1 | db/db | 2494 | 0.061912 | FALSE | 1.575019 | FALSE | Photoreceptor          |
| CATGCAAC db/db1 | db/db | 6561 | 0.032546 | FALSE | 0.607011 | FALSE | Photoreceptor          |
| CATGCAAC db/db1 | db/db | 8915 | 0.017114 | FALSE | 0.406032 | FALSE | Photoreceptor          |
| CATGCAAC db/db1 | db/db | 5420 | 0.130374 | TRUE  | 1.956227 | FALSE |                        |
| CATGCAAT db/db1 | db/db | 1265 | 0.037564 | FALSE | 0.776994 | FALSE | Photoreceptor          |
| CATGCAAT db/db1 | db/db | 449  | 0.024534 | FALSE | 1.800871 | FALSE | Photoreceptor          |
| CATGCAAT db/db1 | db/db | 7266 | 0.01981  | FALSE | 0.593155 | FALSE | Photoreceptor          |
| CATGCAAT db/db1 | db/db | 3108 | 0.014711 | FALSE | 1.040701 | FALSE | Endothelia Capillary E |
| CATGCAAT db/db1 | db/db | 738  | 0.088776 | FALSE | 0.85834  | FALSE | Photoreceptor          |
| CATGCCTA db/db1 | db/db | 8389 | 0.022455 | FALSE | 0.632862 | FALSE | Photoreceptor          |
| CATGCCTA db/db1 | db/db | 7199 | 0.17103  | TRUE  | 1.638811 | FALSE |                        |

|                 |       |      |          |       |          |       |                        |
|-----------------|-------|------|----------|-------|----------|-------|------------------------|
| CATGCCTT db/db1 | db/db | 952  | 0.025416 | FALSE | 1.771942 | FALSE | Endothelia Capillary E |
| CATGCGG db/db1  | db/db | 417  | 0.109795 | TRUE  | 3.639847 | FALSE |                        |
| CATGCGG db/db1  | db/db | 2879 | 0.095727 | FALSE | 1.143922 | FALSE | Photoreceptor          |
| CATGCGG db/db1  | db/db | 8235 | 0.058205 | FALSE | 0.553538 | FALSE | Photoreceptor          |
| CATGCGG db/db1  | db/db | 1668 | 0.027273 | FALSE | 1.005257 | FALSE | Photoreceptor          |
| CATGCTCA db/db1 | db/db | 5347 | 0.012557 | FALSE | 0.709418 | FALSE | Neuron                 |
| CATGCTCA db/db1 | db/db | 2194 | 0.010384 | FALSE | 0.85402  | FALSE | Endothelia Aterial EC  |
| CATGCTCC db/db1 | db/db | 1192 | 0.027273 | FALSE | 2.36157  | FALSE | Muller cell            |
| CATGCTCC db/db1 | db/db | 4973 | 0.03313  | FALSE | 0.836759 | FALSE | Photoreceptor          |
| CATGCTCC db/db1 | db/db | 534  | 0.24     | TRUE  | 2.868852 | FALSE |                        |
| CATGCTCC db/db1 | db/db | 4955 | 0.03313  | FALSE | 0.781808 | FALSE | Photoreceptor          |
| CATGCTCC db/db1 | db/db | 6940 | 0.012052 | FALSE | 0.581136 | FALSE | Photoreceptor          |
| CATGCTCC db/db1 | db/db | 471  | 0.119124 | TRUE  | 4.704097 | FALSE |                        |
| CATGGAT db/db1  | db/db | 361  | 0.057037 | FALSE | 32.247   | TRUE  |                        |
| CATGGAT db/db1  | db/db | 3138 | 0.018088 | FALSE | 1.08928  | FALSE | Endothelia Capillary E |
| CATGGAT db/db1  | db/db | 798  | 0.017758 | FALSE | 1.523437 | FALSE | Photoreceptor          |
| CATGGAT db/db1  | db/db | 1106 | 0.070386 | FALSE | 0.777777 | FALSE | Photoreceptor          |
| CATGGAT db/db1  | db/db | 1771 | 0.05065  | FALSE | 1.339316 | FALSE | Photoreceptor          |
| CATGGAT db/db1  | db/db | 357  | 0.080645 | FALSE | 3.757915 | FALSE | Endothelia Capillary E |
| CATGGAT db/db1  | db/db | 789  | 0.045165 | FALSE | 1.972717 | FALSE | Endothelia Capillary E |
| CATGGAT db/db1  | db/db | 2098 | 0.028251 | FALSE | 1.095909 | FALSE | Endothelia Capillary E |
| CATGGTA db/db1  | db/db | 546  | 0.019455 | FALSE | 2.259744 | FALSE | Neuron                 |
| CATGGTA db/db1  | db/db | 894  | 0.08663  | FALSE | 2.273366 | FALSE | Endothelia Capillary E |
| CATGGTA db/db1  | db/db | 520  | 0.012557 | FALSE | 1.796004 | FALSE | Pericyte               |
| CATGGTA db/db1  | db/db | 1365 | 0.006683 | FALSE | 1.300246 | FALSE | Endothelia EC-C4       |
| CATGGTA db/db1  | db/db | 366  | 0.044326 | FALSE | 2.30965  | FALSE | Endothelia Capillary E |
| CATGGTA db/db1  | db/db | 3399 | 0.164835 | TRUE  | 3.985548 | FALSE |                        |
| CATGGTA db/db1  | db/db | 432  | 0.049679 | FALSE | 1.612202 | FALSE | Pericyte               |
| CATGGTA db/db1  | db/db | 1282 | 0.018088 | FALSE | 1.431925 | FALSE | Endothelia Capillary E |
| CATGGTA db/db1  | db/db | 1114 | 0.021286 | FALSE | 0.464102 | FALSE | Photoreceptor          |
| CATGGTA db/db1  | db/db | 3210 | 0.028251 | FALSE | 1.167941 | FALSE | Endothelia Venous EC   |
| CATGGTA db/db1  | db/db | 1587 | 0.022059 | FALSE | 0.538718 | FALSE | Photoreceptor          |
| CATTCATA db/db1 | db/db | 911  | 0.011805 | FALSE | 1.054444 | FALSE | Endothelia Capillary E |
| CATTCATA db/db1 | db/db | 1465 | 0.061912 | FALSE | 1.662159 | FALSE | Muller cell            |
| CATTCATC db/db1 | db/db | 5654 | 0.026796 | FALSE | 0.875909 | FALSE | Photoreceptor          |
| CATTCATC db/db1 | db/db | 713  | 0.045165 | FALSE | 1.169399 | FALSE | Photoreceptor          |
| CATTCATT db/db1 | db/db | 2930 | 0.100845 | TRUE  | 3.380531 | FALSE |                        |
| CATTCCGA db/db1 | db/db | 1932 | 0.013876 | FALSE | 0.66932  | FALSE | Photoreceptor          |
| CATTCCGA db/db1 | db/db | 1391 | 0.04192  | FALSE | 1.996385 | FALSE | Endothelia Capillary E |
| CATTCCGC db/db1 | db/db | 1517 | 0.043505 | FALSE | 1.293523 | FALSE | Photoreceptor          |
| CATTCCGC db/db1 | db/db | 333  | 0.045165 | FALSE | 17.46881 | TRUE  |                        |
| CATTCCGC db/db1 | db/db | 1654 | 0.14163  | TRUE  | 3.072812 | FALSE |                        |
| CATTCCGC db/db1 | db/db | 905  | 0.019106 | FALSE | 0.440138 | FALSE | Photoreceptor          |
| CATTCCGC db/db1 | db/db | 399  | 0.218615 | TRUE  | 6.653992 | TRUE  |                        |
| CATTCCGC db/db1 | db/db | 1038 | 0.051646 | FALSE | 1.610644 | FALSE | Photoreceptor          |
| CATTCCGT db/db1 | db/db | 823  | 0.014151 | FALSE | 1.050077 | FALSE | Endothelia Capillary E |
| CATTCCGT db/db1 | db/db | 8593 | 0.026328 | FALSE | 0.308774 | FALSE | Photoreceptor          |

|                 |       |      |          |       |          |       |                        |
|-----------------|-------|------|----------|-------|----------|-------|------------------------|
| CATTCTAA db/db1 | db/db | 4085 | 0.018088 | FALSE | 1.100218 | FALSE | Photoreceptor          |
| CATTCTAA db/db1 | db/db | 3684 | 0.036891 | FALSE | 0.537661 | FALSE | Photoreceptor          |
| CATTCTAA db/db1 | db/db | 1900 | 0.018422 | FALSE | 1.246498 | FALSE | Endothelia Capillary E |
| CATTCTAG db/db1 | db/db | 7167 | 0.265464 | TRUE  | 0.924712 | FALSE |                        |
| CATTCTAT db/db1 | db/db | 879  | 0.009712 | FALSE | 1.11581  | FALSE | Endothelia Aterial EC  |
| CATTCTAT db/db1 | db/db | 2487 | 0.102807 | TRUE  | 1.415409 | FALSE |                        |
| CATTGAG db/db1  | db/db | 157  | 0.110901 | TRUE  | 0.222321 | FALSE |                        |
| CATTGAG db/db1  | db/db | 1393 | 0.078788 | FALSE | 1.708773 | FALSE | Photoreceptor          |
| CATTGAG db/db1  | db/db | 723  | 0.218615 | TRUE  | 7.925636 | TRUE  |                        |
| CATTGAG db/db1  | db/db | 2089 | 0.060641 | FALSE | 1.61847  | FALSE | Photoreceptor          |
| CATTGAG db/db1  | db/db | 6699 | 0.021669 | FALSE | 0.655805 | FALSE | Photoreceptor          |
| CATTGAG db/db1  | db/db | 2507 | 0.018422 | FALSE | 0.49929  | FALSE | Photoreceptor          |
| CATTGAG db/db1  | db/db | 727  | 0.025416 | FALSE | 1.028824 | FALSE | Photoreceptor          |
| CATTGAG db/db1  | db/db | 818  | 0.04192  | FALSE | 0.220477 | FALSE | Photoreceptor          |
| CATTGAG db/db1  | db/db | 447  | 0.059406 | FALSE | 1.070485 | FALSE | Photoreceptor          |
| CATTGAG db/db1  | db/db | 1708 | 0.073582 | FALSE | 1.753381 | FALSE | Photoreceptor          |
| CATTGAG db/db1  | db/db | 7022 | 0.022857 | FALSE | 0.579287 | FALSE | Photoreceptor          |
| CATTGAG db/db1  | db/db | 616  | 0.080645 | FALSE | 1.430641 | FALSE | Photoreceptor          |
| CATTGAG db/db1  | db/db | 659  | 0.063221 | FALSE | 2.066229 | FALSE | Endothelia Capillary E |
| CATTGCCA db/db1 | db/db | 376  | 0.030318 | FALSE | 2.885065 | FALSE | Photoreceptor          |
| CATTGCCA db/db1 | db/db | 3691 | 0.038251 | FALSE | 0.965835 | FALSE | Photoreceptor          |
| CATTGCCA db/db1 | db/db | 6225 | 0.032546 | FALSE | 0.646555 | FALSE | Endothelia EC-C4       |
| CATTGCCA db/db1 | db/db | 744  | 0.046025 | FALSE | 0.680624 | FALSE | Neuron                 |
| CATTGCCA db/db1 | db/db | 996  | 0.005958 | FALSE | 0.741738 | FALSE | Endothelia Capillary E |
| CATTGCCC db/db1 | db/db | 5857 | 0.018761 | FALSE | 0.488988 | FALSE | Photoreceptor          |
| CATTGCCC db/db1 | db/db | 1180 | 0.026796 | FALSE | 0.497406 | FALSE | Photoreceptor          |
| CATTGCCC db/db1 | db/db | 1127 | 0.08663  | FALSE | 0.925346 | FALSE | Photoreceptor          |
| CATTGCCC db/db1 | db/db | 606  | 0.076994 | FALSE | 12.31965 | TRUE  |                        |
| CATTGCCC db/db1 | db/db | 1520 | 0.013338 | FALSE | 1.125361 | FALSE | Endothelia Capillary E |
| CATTGCCC db/db1 | db/db | 2030 | 0.022857 | FALSE | 1.383093 | FALSE | Endothelia Capillary E |
| CATTGTTA db/db1 | db/db | 2711 | 0.012557 | FALSE | 0.790751 | FALSE | Endothelia Aterial EC  |
| CATTGTTA db/db1 | db/db | 1493 | 0.039671 | FALSE | 1.059056 | FALSE | Photoreceptor          |
| CATTGTTC db/db1 | db/db | 785  | 0.093319 | FALSE | 0.903828 | FALSE | Photoreceptor          |
| CATTGTTG db/db1 | db/db | 2890 | 0.011805 | FALSE | 1.062376 | FALSE | Endothelia Venous EC   |
| CATTGTTG db/db1 | db/db | 1058 | 0.026796 | FALSE | 1.630201 | FALSE | Pericyte               |
| CATTGTTG db/db1 | db/db | 3304 | 0.009277 | FALSE | 1.015014 | FALSE | Endothelia Venous EC   |
| CATTGTTG db/db1 | db/db | 5817 | 0.265464 | TRUE  | 2.13139  | FALSE |                        |
| CATTGTTT db/db1 | db/db | 928  | 0.080645 | FALSE | 1.330617 | FALSE | Photoreceptor          |
| CATTGTTT db/db1 | db/db | 471  | 0.080645 | FALSE | 5.164319 | TRUE  |                        |
| CATTGTTT db/db1 | db/db | 806  | 0.03313  | FALSE | 0        | FALSE | Photoreceptor          |
| CATTTCAA db/db1 | db/db | 1582 | 0.044326 | FALSE | 0.7792   | FALSE | Photoreceptor          |
| CATTTCAA db/db1 | db/db | 659  | 0.032546 | FALSE | 2.331785 | FALSE | Photoreceptor          |
| CATTTCAG db/db1 | db/db | 2187 | 0.057037 | FALSE | 1.287041 | FALSE | Photoreceptor          |
| CATTTCAG db/db1 | db/db | 733  | 0.192271 | TRUE  | 11.34122 | TRUE  |                        |
| CATTTCAT db/db1 | db/db | 4182 | 0.010846 | FALSE | 0.758467 | FALSE | Endothelia Capillary E |
| CATTTCAT db/db1 | db/db | 2232 | 0.023682 | FALSE | 1.176919 | FALSE | Endothelia EC-C4       |
| CATTTCAT db/db1 | db/db | 2481 | 0.148319 | TRUE  | 3.576267 | FALSE |                        |

|          |        |       |      |          |       |          |       |                        |
|----------|--------|-------|------|----------|-------|----------|-------|------------------------|
| CATTTCA  | db/db1 | db/db | 829  | 0.064568 | FALSE | 1.000548 | FALSE | Photoreceptor          |
| CATTTCA  | db/db1 | db/db | 797  | 0.024534 | FALSE | 0.911327 | FALSE | Photoreceptor          |
| CATTTCA  | db/db1 | db/db | 733  | 0.061912 | FALSE | 2.085416 | FALSE | Photoreceptor          |
| CATTTCA  | db/db1 | db/db | 1007 | 0.020536 | FALSE | 0.340871 | FALSE | Photoreceptor          |
| CCAAGCG  | db/db1 | db/db | 4762 | 0.070386 | FALSE | 0.790166 | FALSE | Endothelia Venous EC   |
| CCAAGCG  | db/db1 | db/db | 3166 | 0.014997 | FALSE | 0.858753 | FALSE | Neuron                 |
| CCAAGCG  | db/db1 | db/db | 6828 | 0.026796 | FALSE | 0.849745 | FALSE | Photoreceptor          |
| CCAAGCG  | db/db1 | db/db | 3968 | 0.126437 | TRUE  | 3.949715 | FALSE |                        |
| CCAAGCG  | db/db1 | db/db | 4206 | 0.026796 | FALSE | 0.875805 | FALSE | Photoreceptor          |
| CCAAGCG  | db/db1 | db/db | 797  | 0.080645 | FALSE | 2.072444 | FALSE | Photoreceptor          |
| CCAAGCG  | db/db1 | db/db | 4909 | 0.067388 | FALSE | 0.803317 | FALSE | Endothelia EC-C4       |
| CCAAGCG  | db/db1 | db/db | 479  | 0.019106 | FALSE | 0.391133 | FALSE | Photoreceptor          |
| CCAATGA  | db/db1 | db/db | 3322 | 0.012814 | FALSE | 0.880455 | FALSE | Photoreceptor          |
| CCAATGA  | db/db1 | db/db | 4951 | 0.012303 | FALSE | 0.185989 | FALSE | Photoreceptor          |
| CCAATGA  | db/db1 | db/db | 1511 | 0.053718 | FALSE | 0.738448 | FALSE | Photoreceptor          |
| CCAATGA  | db/db1 | db/db | 1808 | 0.015879 | FALSE | 1.1307   | FALSE | Endothelia Capillary E |
| CCAATGA  | db/db1 | db/db | 1463 | 0.034334 | FALSE | 0.785231 | FALSE | Photoreceptor          |
| CCAATGA  | db/db1 | db/db | 1881 | 0.026328 | FALSE | 0.70513  | FALSE | Photoreceptor          |
| CCAATGA  | db/db1 | db/db | 4192 | 0.049679 | FALSE | 0.803929 | FALSE | Photoreceptor          |
| CCAATGA  | db/db1 | db/db | 1143 | 0.038251 | FALSE | 1.584015 | FALSE | Endothelia Capillary E |
| CCAATGA  | db/db1 | db/db | 3353 | 0.020171 | FALSE | 0.940483 | FALSE | Photoreceptor          |
| CCAATGA  | db/db1 | db/db | 483  | 0.054795 | FALSE | 1.645777 | FALSE | Photoreceptor          |
| CCAATTA  | db/db1 | db/db | 2051 | 0.063221 | FALSE | 1.68318  | FALSE | Endothelia Venous EC   |
| CCAATTA  | db/db1 | db/db | 3854 | 0.103567 | TRUE  | 1.538802 | FALSE |                        |
| CCAATTC  | db/db1 | db/db | 1730 | 0.022059 | FALSE | 1.147291 | FALSE | Endothelia Capillary E |
| CCAATTC  | db/db1 | db/db | 1918 | 0.019106 | FALSE | 1.082153 | FALSE | Endothelia Capillary E |
| CCAATTC  | db/db1 | db/db | 4633 | 0.032546 | FALSE | 0.831981 | FALSE | Endothelia Capillary E |
| CCAATTG  | db/db1 | db/db | 445  | 0.026796 | FALSE | 2.259313 | FALSE | Muller cell            |
| CCAATTG  | db/db1 | db/db | 831  | 0.031973 | FALSE | 0.219208 | FALSE | Photoreceptor          |
| CCAATTG  | db/db1 | db/db | 5702 | 0.024534 | FALSE | 0.534724 | FALSE | Photoreceptor          |
| CCAATTG  | db/db1 | db/db | 1914 | 0.035586 | FALSE | 1.035144 | FALSE | Endothelia Capillary E |
| CCAATTT  | db/db1 | db/db | 1026 | 0.032546 | FALSE | 0.635662 | FALSE | Photoreceptor          |
| CCAATTT  | db/db1 | db/db | 374  | 0.095727 | FALSE | 14.41281 | TRUE  |                        |
| CCACAAA  | db/db1 | db/db | 3441 | 0.046906 | FALSE | 0.695484 | FALSE | Endothelia Venous EC   |
| CCACAAA  | db/db1 | db/db | 4301 | 0.029266 | FALSE | 0.888813 | FALSE | Endothelia Venous EC   |
| CCACAAA  | db/db1 | db/db | 3273 | 0.026328 | FALSE | 0.938795 | FALSE | Endothelia Venous EC   |
| CCACAAA  | db/db1 | db/db | 2622 | 0.039671 | FALSE | 0.434575 | FALSE | Photoreceptor          |
| CCACAAA  | db/db1 | db/db | 7642 | 0.013338 | FALSE | 0.318186 | FALSE | Photoreceptor          |
| CCACAAA  | db/db1 | db/db | 1816 | 0.112477 | TRUE  | 2.762876 | FALSE |                        |
| CCACAAA  | db/db1 | db/db | 1803 | 0.029787 | FALSE | 0.473123 | FALSE | Photoreceptor          |
| CCACAAA  | db/db1 | db/db | 591  | 0.034954 | FALSE | 1.119116 | FALSE | Photoreceptor          |
| CCACAAA  | db/db1 | db/db | 824  | 0.088776 | FALSE | 0.594712 | FALSE | Photoreceptor          |
| CCACAAA  | db/db1 | db/db | 709  | 0.006499 | FALSE | 1.698027 | FALSE | Endothelia Capillary E |
| CCACACTA | db/db1 | db/db | 8250 | 0.016799 | FALSE | 0.589934 | FALSE | Photoreceptor          |
| CCACACTA | db/db1 | db/db | 2027 | 0.018088 | FALSE | 1.125337 | FALSE | Endothelia Aterial EC  |
| CCACACTC | db/db1 | db/db | 945  | 0.055901 | FALSE | 1.563756 | FALSE | Photoreceptor          |
| CCACACTC | db/db1 | db/db | 3154 | 0.059406 | FALSE | 1.199799 | FALSE | Photoreceptor          |



|                 |       |      |          |       |          |       |                        |
|-----------------|-------|------|----------|-------|----------|-------|------------------------|
| CCCACTC db/db1  | db/db | 620  | 0.036891 | FALSE | 2.153061 | FALSE | Muller cell            |
| CCCACTG db/db1  | db/db | 996  | 0.031411 | FALSE | 2.116561 | FALSE | Muller cell            |
| CCCACTG db/db1  | db/db | 1078 | 0.126437 | TRUE  | 2.690583 | FALSE |                        |
| CCCACTG db/db1  | db/db | 2424 | 0.023266 | FALSE | 0.507251 | FALSE | Photoreceptor          |
| CCCACTT db/db1  | db/db | 1467 | 0.017758 | FALSE | 0.731056 | FALSE | Photoreceptor          |
| CCCACTT db/db1  | db/db | 868  | 0.013338 | FALSE | 0.249888 | FALSE | Photoreceptor          |
| CCCACTT db/db1  | db/db | 1075 | 0.035586 | FALSE | 0.882482 | FALSE | Photoreceptor          |
| CCCACTT db/db1  | db/db | 738  | 0.080645 | FALSE | 2.115055 | FALSE | Endothelia Capillary E |
| CCACCATA db/db1 | db/db | 4177 | 0.035586 | FALSE | 0.875112 | FALSE | Photoreceptor          |
| CCACCATC db/db1 | db/db | 8435 | 0.012052 | FALSE | 0.572538 | FALSE | Photoreceptor          |
| CCACCATC db/db1 | db/db | 8498 | 0.034954 | FALSE | 0.544296 | FALSE | Photoreceptor          |
| CCACCATC db/db1 | db/db | 882  | 0.027273 | FALSE | 1.319978 | FALSE | Endothelia EC-C4       |
| CCACCATG db/db1 | db/db | 2871 | 0.046025 | FALSE | 1.13452  | FALSE | Photoreceptor          |
| CCACCATT db/db1 | db/db | 1201 | 0.052669 | FALSE | 0.657608 | FALSE | Photoreceptor          |
| CCACCATT db/db1 | db/db | 1436 | 0.03313  | FALSE | 0.843238 | FALSE | Photoreceptor          |
| CCACCATT db/db1 | db/db | 1054 | 0.009712 | FALSE | 1.538468 | FALSE | Endothelia EC-C4       |
| CCACCATT db/db1 | db/db | 472  | 0.027758 | FALSE | 3.530054 | FALSE | Endothelia Capillary E |
| CCACCATT db/db1 | db/db | 986  | 0.064568 | FALSE | 1.500584 | FALSE | Photoreceptor          |
| CCACGAG db/db1  | db/db | 8232 | 0.019106 | FALSE | 0.381509 | FALSE | Photoreceptor          |
| CCACGAG db/db1  | db/db | 1349 | 0.123864 | TRUE  | 3.471295 | FALSE |                        |
| CCACGAG db/db1  | db/db | 4474 | 0.022857 | FALSE | 0.657839 | FALSE | Photoreceptor          |
| CCACGAG db/db1  | db/db | 566  | 0.024971 | FALSE | 2.026957 | FALSE | Pericyte               |
| CCACGAG db/db1  | db/db | 3435 | 0.148319 | TRUE  | 1.552244 | FALSE |                        |
| CCACGAG db/db1  | db/db | 1031 | 0.091004 | FALSE | 2.915328 | FALSE | Muller cell            |
| CCACGAG db/db1  | db/db | 7949 | 0.023266 | FALSE | 0.568971 | FALSE | Photoreceptor          |
| CCACGAG db/db1  | db/db | 2769 | 0.059406 | FALSE | 1.104373 | FALSE | Photoreceptor          |
| CCACGAG db/db1  | db/db | 520  | 0.026796 | FALSE | 2.929134 | FALSE | Muller cell            |
| CCACGAG db/db1  | db/db | 3966 | 0.022455 | FALSE | 1.02099  | FALSE | Endothelia Venous EC   |
| CCACGAG db/db1  | db/db | 604  | 0.067388 | FALSE | 1.918538 | FALSE | Photoreceptor          |
| CCACGAG db/db1  | db/db | 4493 | 0.01981  | FALSE | 0.700617 | FALSE | Photoreceptor          |
| CCACGTTA db/db1 | db/db | 3354 | 0.044326 | FALSE | 0.893939 | FALSE | Photoreceptor          |
| CCACGTTA db/db1 | db/db | 1079 | 0.014429 | FALSE | 1.675896 | FALSE | Photoreceptor          |
| CCACGTTC db/db1 | db/db | 8038 | 0.026328 | FALSE | 0.708423 | FALSE | Photoreceptor          |
| CCACGTTC db/db1 | db/db | 1934 | 0.061912 | FALSE | 0.748807 | FALSE | Endothelia Capillary E |
| CCACGTTT db/db1 | db/db | 2152 | 0.031411 | FALSE | 0.810573 | FALSE | Photoreceptor          |
| CCACGTTT db/db1 | db/db | 5106 | 0.184701 | TRUE  | 2.527657 | FALSE |                        |
| CCACTTGA db/db1 | db/db | 2605 | 0.070386 | FALSE | 8.263453 | TRUE  |                        |
| CCACTTGA db/db1 | db/db | 1408 | 0.021669 | FALSE | 1.193334 | FALSE | Endothelia Capillary E |
| CCACTTGA db/db1 | db/db | 2180 | 0.004116 | FALSE | 0.767583 | FALSE | Neuron                 |
| CCACTTGC db/db1 | db/db | 621  | 0.036891 | FALSE | 4.827063 | FALSE | Muller cell            |
| CCACTTGC db/db1 | db/db | 974  | 0.022857 | FALSE | 0.24558  | FALSE | Photoreceptor          |
| CCACTTGC db/db1 | db/db | 730  | 0.027273 | FALSE | 1.225862 | FALSE | Neuron                 |
| CCACTTGC db/db1 | db/db | 1161 | 0.125386 | TRUE  | 2.909298 | FALSE |                        |
| CCACTTGT db/db1 | db/db | 1877 | 0.080645 | FALSE | 1.548244 | FALSE | Endothelia Capillary E |
| CCACTTGT db/db1 | db/db | 973  | 0.012814 | FALSE | 3.813792 | FALSE | Muller cell            |
| CCACTTGT db/db1 | db/db | 1039 | 0.031411 | FALSE | 2.667458 | FALSE | Neuron                 |
| CCATAAG db/db1  | db/db | 2821 | 0.133788 | TRUE  | 3.77646  | FALSE |                        |

|                 |       |      |          |       |          |       |                        |
|-----------------|-------|------|----------|-------|----------|-------|------------------------|
| CCATAAG/db/db1  | db/db | 1045 | 0.019455 | FALSE | 0.342512 | FALSE | Photoreceptor          |
| CCATAAG/db/db1  | db/db | 821  | 0.022857 | FALSE | 1.016732 | FALSE | Photoreceptor          |
| CCATAAG/db/db1  | db/db | 558  | 0.091004 | FALSE | 1.852056 | FALSE | Endothelia Capillary E |
| CCATAAGC db/db1 | db/db | 8889 | 0.012814 | FALSE | 0.515777 | FALSE | Photoreceptor          |
| CCATAAGC db/db1 | db/db | 6356 | 0.013338 | FALSE | 0.53411  | FALSE | Photoreceptor          |
| CCATAAGC db/db1 | db/db | 3537 | 0.023682 | FALSE | 0.707761 | FALSE | Photoreceptor          |
| CCATAAGC db/db1 | db/db | 2246 | 0.044326 | FALSE | 1.232361 | FALSE | Endothelia Capillary E |
| CCATAAGC db/db1 | db/db | 1044 | 0.059406 | FALSE | 1.908568 | FALSE | Photoreceptor          |
| CCATAAGT db/db1 | db/db | 974  | 0.068864 | FALSE | 2.549841 | FALSE | Muller cell            |
| CCATAAGT db/db1 | db/db | 806  | 0.036891 | FALSE | 0.922961 | FALSE | Photoreceptor          |
| CCATAAGT db/db1 | db/db | 2773 | 0.061912 | FALSE | 1.079453 | FALSE | Photoreceptor          |
| CCATAAGT db/db1 | db/db | 6821 | 0.012814 | FALSE | 0.523953 | FALSE | Photoreceptor          |
| CCATAAGT db/db1 | db/db | 3131 | 0.065957 | FALSE | 1.115984 | FALSE | Endothelia Venous EC   |
| CCATAAGT db/db1 | db/db | 628  | 0.030318 | FALSE | 0.478047 | FALSE | Photoreceptor          |
| CCATCACA db/db1 | db/db | 3869 | 0.018422 | FALSE | 1.075577 | FALSE | Photoreceptor          |
| CCATCACA db/db1 | db/db | 2350 | 0.025868 | FALSE | 1.183353 | FALSE | Endothelia Capillary E |
| CCATCACA db/db1 | db/db | 6694 | 0.015581 | FALSE | 0.329358 | FALSE | Photoreceptor          |
| CCATCACA db/db1 | db/db | 804  | 0.028251 | FALSE | 1.835437 | FALSE | Endothelia Capillary E |
| CCATCACC db/db1 | db/db | 4990 | 0.17103  | TRUE  | 3.019867 | FALSE |                        |
| CCATCACC db/db1 | db/db | 512  | 0.054795 | FALSE | 2.637953 | FALSE | Photoreceptor          |
| CCATCACC db/db1 | db/db | 1399 | 0.020908 | FALSE | 0.725575 | FALSE | Photoreceptor          |
| CCATCACT db/db1 | db/db | 3460 | 0.209157 | TRUE  | 5.651713 | TRUE  |                        |
| CCATCACT db/db1 | db/db | 4773 | 0.05065  | FALSE | 0.769115 | FALSE | Endothelia Venous EC   |
| CCATCACT db/db1 | db/db | 730  | 0.119124 | TRUE  | 6.145252 | TRUE  |                        |
| CCATCACT db/db1 | db/db | 1561 | 0.08663  | FALSE | 1.668263 | FALSE | Photoreceptor          |
| CCATCACT db/db1 | db/db | 387  | 0.018422 | FALSE | 1.487371 | FALSE | Photoreceptor          |
| CCCAACTC db/db1 | db/db | 592  | 0.03313  | FALSE | 0.623221 | FALSE | Muller cell            |
| CCCAACTC db/db1 | db/db | 2984 | 0.017434 | FALSE | 0.662574 | FALSE | Endothelia Aterial EC  |
| CCCAACTC db/db1 | db/db | 1223 | 0.025416 | FALSE | 2.824215 | FALSE | Muller cell            |
| CCCAACTT db/db1 | db/db | 1446 | 0.016488 | FALSE | 0.361369 | FALSE | Photoreceptor          |
| CCCAACTT db/db1 | db/db | 3707 | 0.041154 | FALSE | 0.690662 | FALSE | Photoreceptor          |
| CCCAACTT db/db1 | db/db | 805  | 0.047807 | FALSE | 1.226769 | FALSE | Photoreceptor          |
| CCCAACTT db/db1 | db/db | 1457 | 0.018761 | FALSE | 1.344672 | FALSE | Endothelia Aterial EC  |
| CCCATTGA db/db1 | db/db | 5225 | 0.027758 | FALSE | 0.981336 | FALSE | Photoreceptor          |
| CCCATTGC db/db1 | db/db | 3529 | 0.044326 | FALSE | 1.11988  | FALSE | Photoreceptor          |
| CCCATTGC db/db1 | db/db | 1889 | 0.011081 | FALSE | 0.821317 | FALSE | Endothelia EC-C4       |
| CCCATTGC db/db1 | db/db | 931  | 0.049679 | FALSE | 0.710655 | FALSE | Photoreceptor          |
| CCCATTGC db/db1 | db/db | 3836 | 0.013074 | FALSE | 0.91874  | FALSE | Endothelia Venous EC   |
| CCCATTGC db/db1 | db/db | 2014 | 0.057037 | FALSE | 1.220946 | FALSE | Photoreceptor          |
| CCCATTGC db/db1 | db/db | 8308 | 0.025416 | FALSE | 0.318967 | FALSE | Photoreceptor          |
| CCCATTGT db/db1 | db/db | 4388 | 0.018761 | FALSE | 0.820337 | FALSE | Endothelia EC-C4       |
| CCCATTGT db/db1 | db/db | 5389 | 0.023266 | FALSE | 0.609094 | FALSE | Photoreceptor          |
| CCCATTGT db/db1 | db/db | 8604 | 0.012052 | FALSE | 0.408293 | FALSE | Photoreceptor          |
| CCCGAAG/db/db1  | db/db | 714  | 0.034954 | FALSE | 1.207654 | FALSE | Photoreceptor          |
| CCCGAAG/db/db1  | db/db | 624  | 0.078788 | FALSE | 1.629167 | FALSE | Endothelia Capillary E |
| CCCGAAGC db/db1 | db/db | 1099 | 0.018088 | FALSE | 0.522645 | FALSE | Photoreceptor          |
| CCCGAAGC db/db1 | db/db | 2781 | 0.034954 | FALSE | 1.356364 | FALSE | Photoreceptor          |

|                 |       |      |          |       |          |       |                        |
|-----------------|-------|------|----------|-------|----------|-------|------------------------|
| CCCGAAGC db/db1 | db/db | 4692 | 0.071958 | FALSE | 0.811126 | FALSE | Endothelia Venous EC   |
| CCCGAAGT db/db1 | db/db | 1722 | 0.036232 | FALSE | 0.888395 | FALSE | Photoreceptor          |
| CCCGGAA/ db/db1 | db/db | 3222 | 0.028754 | FALSE | 1.261423 | FALSE | Photoreceptor          |
| CCCGGAA( db/db1 | db/db | 2076 | 0.013876 | FALSE | 1.253764 | FALSE | Endothelia Capillary E |
| CCCGGAA\ db/db1 | db/db | 3275 | 0.026328 | FALSE | 0.806672 | FALSE | Endothelia Venous EC   |
| CCCGGAA\ db/db1 | db/db | 538  | 0.016181 | FALSE | 2.166345 | FALSE | Photoreceptor          |
| CCCTAACA db/db1 | db/db | 1661 | 0.05065  | FALSE | 1.194393 | FALSE | Photoreceptor          |
| CCCTAACA db/db1 | db/db | 576  | 0.084562 | FALSE | 1.7439   | FALSE | Photoreceptor          |
| CCCTAACT db/db1 | db/db | 5684 | 0.031411 | FALSE | 0.780932 | FALSE | Photoreceptor          |
| CCCTCAAC db/db1 | db/db | 3732 | 0.031411 | FALSE | 0.772174 | FALSE | Endothelia EC-C4       |
| CCCTCAAC db/db1 | db/db | 904  | 0.067388 | FALSE | 1.716208 | FALSE | Photoreceptor          |
| CCCTCAAG db/db1 | db/db | 3784 | 0.032546 | FALSE | 1.070534 | FALSE | Photoreceptor          |
| CCCTCAAG db/db1 | db/db | 5243 | 0.021286 | FALSE | 0.645251 | FALSE | Photoreceptor          |
| CCCTCTCC db/db1 | db/db | 4129 | 0.131994 | TRUE  | 2.302816 | FALSE |                        |
| CCCTCTCG db/db1 | db/db | 1040 | 0.04192  | FALSE | 1.158245 | FALSE | Endothelia Capillary E |
| CCCTCTCT db/db1 | db/db | 2287 | 0.101906 | TRUE  | 1.936265 | FALSE |                        |
| CCCTCTCT db/db1 | db/db | 424  | 0.045165 | FALSE | 3.377053 | FALSE | Muller cell            |
| CCCTGATC db/db1 | db/db | 1652 | 0.045165 | FALSE | 0.898619 | FALSE | Photoreceptor          |
| CCCTGATC db/db1 | db/db | 3930 | 0.030859 | FALSE | 1.184862 | FALSE | Photoreceptor          |
| CCCTGATC db/db1 | db/db | 1678 | 0.018088 | FALSE | 1.146072 | FALSE | Endothelia Aterial EC  |
| CCCTGATC db/db1 | db/db | 2424 | 0.020908 | FALSE | 1.146778 | FALSE | Endothelia EC-C4       |
| CCCTGATG db/db1 | db/db | 8641 | 0.021669 | FALSE | 0.673698 | FALSE | Photoreceptor          |
| CCCTGATG db/db1 | db/db | 593  | 0.05065  | FALSE | 1.373775 | FALSE | Photoreceptor          |
| CCCTGATG db/db1 | db/db | 1062 | 0.143776 | TRUE  | 3.375    | FALSE |                        |
| CCCTGATG db/db1 | db/db | 1031 | 0.016181 | FALSE | 0.893642 | FALSE | Endothelia Capillary E |
| CCCTGATT db/db1 | db/db | 3051 | 0.018088 | FALSE | 0.229805 | FALSE | Photoreceptor          |
| CCCTTAGA db/db1 | db/db | 440  | 0.082569 | FALSE | 3.805979 | FALSE | Photoreceptor          |
| CCCTTAGA db/db1 | db/db | 1630 | 0.098234 | FALSE | 1.313309 | FALSE | Photoreceptor          |
| CCCTTAGC db/db1 | db/db | 539  | 0.200401 | TRUE  | 11.04218 | TRUE  |                        |
| CCCTTAGC db/db1 | db/db | 980  | 0.113205 | TRUE  | 1.640975 | FALSE |                        |
| CCCTTAGC db/db1 | db/db | 2121 | 0.080645 | FALSE | 1.27635  | FALSE | Photoreceptor          |
| CCCTTAGC db/db1 | db/db | 1036 | 0.048732 | FALSE | 1.319035 | FALSE | Endothelia Capillary E |
| CCCTTAGC db/db1 | db/db | 1291 | 0.022857 | FALSE | 1.153474 | FALSE | Endothelia EC-C4       |
| CCCTTAGT db/db1 | db/db | 4322 | 0.017114 | FALSE | 0.514744 | FALSE | Photoreceptor          |
| CCCTTAGT db/db1 | db/db | 7770 | 0.017758 | FALSE | 0.4833   | FALSE | Photoreceptor          |
| CCCTTAGT db/db1 | db/db | 374  | 0.059406 | FALSE | 3.580926 | FALSE | Muller cell            |
| CCCTTAGT db/db1 | db/db | 578  | 0.054795 | FALSE | 2.886146 | FALSE | Photoreceptor          |
| CCGAACG/ db/db1 | db/db | 795  | 0.123864 | TRUE  | 3.513514 | FALSE |                        |
| CCGAACG/ db/db1 | db/db | 1569 | 0.024105 | FALSE | 1.326894 | FALSE | Endothelia Capillary E |
| CCGAACG( db/db1 | db/db | 1726 | 0.012052 | FALSE | 0.994445 | FALSE | Endothelia EC-C4       |
| CCGAACG( db/db1 | db/db | 1045 | 0.061912 | FALSE | 0.941321 | FALSE | Photoreceptor          |
| CCGAACG( db/db1 | db/db | 3175 | 0.070386 | FALSE | 0.848458 | FALSE | Photoreceptor          |
| CCGAACG\ db/db1 | db/db | 611  | 0.08663  | FALSE | 3.301543 | FALSE | Endothelia Capillary E |
| CCGAACG\ db/db1 | db/db | 486  | 0.007636 | FALSE | 1.447937 | FALSE | Endothelia Capillary E |
| CCGATCTA db/db1 | db/db | 1317 | 0.029266 | FALSE | 1.5536   | FALSE | Endothelia Capillary E |
| CCGATCTA db/db1 | db/db | 2775 | 0.044326 | FALSE | 0.87928  | FALSE | Neuron                 |
| CCGATCTA db/db1 | db/db | 2292 | 0.042704 | FALSE | 0.954789 | FALSE | Microglia              |

|                 |       |      |          |       |          |       |                        |
|-----------------|-------|------|----------|-------|----------|-------|------------------------|
| CCGATCTC db/db1 | db/db | 1030 | 0.03313  | FALSE | 1.84633  | FALSE | Photoreceptor          |
| CCGATCTC db/db1 | db/db | 1077 | 0.076994 | FALSE | 2.402747 | FALSE | Muller cell            |
| CCGATCTC db/db1 | db/db | 1578 | 0.031411 | FALSE | 1.139771 | FALSE | Endothelia Venous EC   |
| CCGATCTC db/db1 | db/db | 1747 | 0.037564 | FALSE | 1.280461 | FALSE | Endothelia Capillary E |
| CCGATCTC db/db1 | db/db | 414  | 0.082569 | FALSE | 6.6787   | TRUE  |                        |
| CCGATCTC db/db1 | db/db | 687  | 0.039671 | FALSE | 4.890517 | FALSE | Muller cell            |
| CCGATGG db/db1  | db/db | 2299 | 0.019106 | FALSE | 1.20218  | FALSE | Endothelia Capillary E |
| CCGATGG db/db1  | db/db | 7198 | 0.013074 | FALSE | 0.508493 | FALSE | Photoreceptor          |
| CCGATGG db/db1  | db/db | 956  | 0.034334 | FALSE | 0.705959 | FALSE | Photoreceptor          |
| CCGATGG db/db1  | db/db | 828  | 0.022059 | FALSE | 1.461759 | FALSE | Pericyte               |
| CCGATGG db/db1  | db/db | 456  | 0.009933 | FALSE | 1.985744 | FALSE | Endothelia Capillary E |
| CCGATGG db/db1  | db/db | 443  | 0.033726 | FALSE | 2.700272 | FALSE | Photoreceptor          |
| CCGATGG db/db1  | db/db | 3836 | 0.029266 | FALSE | 1.167138 | FALSE | Photoreceptor          |
| CCGATGG db/db1  | db/db | 524  | 0.038953 | FALSE | 2.181759 | FALSE | Photoreceptor          |
| CCGATGG db/db1  | db/db | 1467 | 0.052669 | FALSE | 1.023831 | FALSE | Photoreceptor          |
| CCGCAAG db/db1  | db/db | 7427 | 0.031411 | FALSE | 0.614666 | FALSE | Photoreceptor          |
| CCGCAAG db/db1  | db/db | 1856 | 0.023682 | FALSE | 1.226867 | FALSE | Endothelia Capillary E |
| CCGCAAG db/db1  | db/db | 6537 | 0.411992 | TRUE  | 2.948437 | FALSE |                        |
| CCGCAAG db/db1  | db/db | 2957 | 0.014151 | FALSE | 1.100549 | FALSE | Endothelia EC-C4       |
| CCGCAAG db/db1  | db/db | 2363 | 0.023682 | FALSE | 1.121794 | FALSE | Endothelia Venous EC   |
| CCGCAAG db/db1  | db/db | 1554 | 0.148319 | TRUE  | 4.444445 | FALSE |                        |
| CCGCAAG db/db1  | db/db | 3622 | 0.143776 | TRUE  | 2.316829 | FALSE |                        |
| CCGGACA db/db1  | db/db | 1446 | 0.131994 | TRUE  | 1.031779 | FALSE |                        |
| CCGGACA db/db1  | db/db | 3993 | 0.059406 | FALSE | 1.048707 | FALSE | Photoreceptor          |
| CCGGACA db/db1  | db/db | 6262 | 0.055901 | FALSE | 0.685037 | FALSE | Endothelia Venous EC   |
| CCGGACA db/db1  | db/db | 851  | 0.044326 | FALSE | 3.356077 | FALSE | Muller cell            |
| CCGGGTA db/db1  | db/db | 486  | 0.024534 | FALSE | 2.370402 | FALSE | Muller cell            |
| CCGGGTA db/db1  | db/db | 635  | 0.106646 | TRUE  | 1.002506 | FALSE |                        |
| CCGGGTA db/db1  | db/db | 3131 | 0.022857 | FALSE | 0.929276 | FALSE | Endothelia Aterial EC  |
| CCGGGTA db/db1  | db/db | 4788 | 0.031411 | FALSE | 0.878787 | FALSE | Photoreceptor          |
| CCGGGTA db/db1  | db/db | 2137 | 0.019455 | FALSE | 0.49955  | FALSE | Photoreceptor          |
| CCGGGTA db/db1  | db/db | 2391 | 0.014151 | FALSE | 1.18351  | FALSE | Endothelia Capillary E |
| CCGGTAG db/db1  | db/db | 401  | 0.011319 | FALSE | 2.507108 | FALSE | Pericyte               |
| CCGGTAG db/db1  | db/db | 798  | 0.055901 | FALSE | 2.026438 | FALSE | Endothelia Capillary E |
| CCGGTAG db/db1  | db/db | 477  | 0.082569 | FALSE | 10.63257 | TRUE  |                        |
| CCGGTAG db/db1  | db/db | 730  | 0.053718 | FALSE | 1.24515  | FALSE | Photoreceptor          |
| CCGGTAG db/db1  | db/db | 1668 | 0.020536 | FALSE | 0.958949 | FALSE | Endothelia EC-C4       |
| CCGGTAG db/db1  | db/db | 493  | 0.022059 | FALSE | 3.029912 | FALSE | Neuron                 |
| CCGGTAG db/db1  | db/db | 3352 | 0.060641 | FALSE | 1.247932 | FALSE | Photoreceptor          |
| CCGGTAG db/db1  | db/db | 800  | 0.070386 | FALSE | 1.792344 | FALSE | Photoreceptor          |
| CCGGTAG db/db1  | db/db | 1130 | 0.014997 | FALSE | 1.715606 | FALSE | Endothelia Capillary E |
| CCGGTAG db/db1  | db/db | 648  | 0.054795 | FALSE | 2.240491 | FALSE | Photoreceptor          |
| CCGGTAG db/db1  | db/db | 354  | 0.053718 | FALSE | 3.754911 | FALSE | Muller cell            |
| CCGGTAG db/db1  | db/db | 553  | 0.007833 | FALSE | 2.2573   | FALSE | Endothelia Capillary E |
| CCGGTAG db/db1  | db/db | 1392 | 0.029266 | FALSE | 1.075674 | FALSE | Endothelia EC-C4       |
| CCGGTAG db/db1  | db/db | 3745 | 0.023266 | FALSE | 1.028429 | FALSE | Endothelia Venous EC   |
| CCGGTGA db/db1  | db/db | 7221 | 0.017114 | FALSE | 0.550036 | FALSE | Photoreceptor          |

|                 |       |      |          |       |          |       |                        |
|-----------------|-------|------|----------|-------|----------|-------|------------------------|
| CCGGTGA/db/db1  | db/db | 5280 | 0.025868 | FALSE | 0.814903 | FALSE | Photoreceptor          |
| CCGGTGA/db/db1  | db/db | 1150 | 0.034334 | FALSE | 1.674639 | FALSE | Endothelia Capillary E |
| CCGGTGA/db/db1  | db/db | 3577 | 0.024971 | FALSE | 1.17205  | FALSE | Endothelia EC-C4       |
| CCGGTGA/db/db1  | db/db | 427  | 0.037564 | FALSE | 1.41661  | FALSE | Photoreceptor          |
| CCGGTGA/db/db1  | db/db | 1766 | 0.030859 | FALSE | 1.04845  | FALSE | Endothelia Capillary E |
| CCGGTGA/db/db1  | db/db | 469  | 0.010157 | FALSE | 3.082233 | FALSE | Pericyte               |
| CCGTAGG/db/db1  | db/db | 3273 | 0.009712 | FALSE | 1.063099 | FALSE | Endothelia Venous EC   |
| CCGTAGG/db/db1  | db/db | 2785 | 0.013876 | FALSE | 0.85888  | FALSE | Endothelia Venous EC   |
| CCGTAGG/db/db1  | db/db | 1732 | 0.040404 | FALSE | 1.154448 | FALSE | Photoreceptor          |
| CCGTAGG/db/db1  | db/db | 2517 | 0.016799 | FALSE | 1.348691 | FALSE | Endothelia Capillary E |
| CCGTAGG/db/db1  | db/db | 388  | 0.08663  | FALSE | 1.47288  | FALSE | Microglia              |
| CCGTGAG/db/db1  | db/db | 2969 | 0.03313  | FALSE | 1.153906 | FALSE | Endothelia Venous EC   |
| CCGTGAG/db/db1  | db/db | 1587 | 0.016488 | FALSE | 0.964126 | FALSE | Endothelia EC-C4       |
| CCGTGAG/db/db1  | db/db | 3081 | 0.029266 | FALSE | 0.498174 | FALSE | Photoreceptor          |
| CCGTGAG/db/db1  | db/db | 639  | 0.036891 | FALSE | 1.77482  | FALSE | Photoreceptor          |
| CCGTGAG/db/db1  | db/db | 578  | 0.012052 | FALSE | 0.7982   | FALSE | Photoreceptor          |
| CCGTGAG/db/db1  | db/db | 4122 | 0.053718 | FALSE | 0.919061 | FALSE | Photoreceptor          |
| CCGTTCAA db/db1 | db/db | 650  | 0.041154 | FALSE | 1.247629 | FALSE | Photoreceptor          |
| CCGTTCAA db/db1 | db/db | 519  | 0.018088 | FALSE | 0.352963 | FALSE | Pericyte               |
| CCGTTCAA db/db1 | db/db | 1509 | 0.039671 | FALSE | 1.529095 | FALSE | Photoreceptor          |
| CCGTTCAA db/db1 | db/db | 1807 | 0.143501 | TRUE  | 2.400906 | FALSE |                        |
| CCGTTCAA db/db1 | db/db | 2267 | 0.052669 | FALSE | 0.979837 | FALSE | Neuron                 |
| CCGTTCAA db/db1 | db/db | 5867 | 0.030318 | FALSE | 0.649508 | FALSE | Photoreceptor          |
| CCGTTCAC db/db1 | db/db | 3489 | 0.164835 | TRUE  | 1.087096 | FALSE |                        |
| CCGTTCAC db/db1 | db/db | 7211 | 0.015287 | FALSE | 0.674479 | FALSE | Photoreceptor          |
| CCGTTCAC db/db1 | db/db | 1288 | 0.029787 | FALSE | 1.477823 | FALSE | Photoreceptor          |
| CCGTTCA db/db1  | db/db | 6404 | 0.016488 | FALSE | 0.619881 | FALSE | Photoreceptor          |
| CCGTTCA db/db1  | db/db | 374  | 0.057037 | FALSE | 3.845673 | FALSE | Neuron                 |
| CCGTTCAT db/db1 | db/db | 1899 | 0.016181 | FALSE | 1.19366  | FALSE | Endothelia Capillary E |
| CCTAACCA db/db1 | db/db | 792  | 0.033726 | FALSE | 2.422009 | FALSE | Endothelia Capillary E |
| CCTAACCA db/db1 | db/db | 1603 | 0.031973 | FALSE | 1.102077 | FALSE | Endothelia EC-C4       |
| CCTAACCC db/db1 | db/db | 1871 | 0.08663  | FALSE | 1.268345 | FALSE | Photoreceptor          |
| CCTAACCC db/db1 | db/db | 1245 | 0.067388 | FALSE | 3.088496 | FALSE | Muller cell            |
| CCTAACCC db/db1 | db/db | 3565 | 0.065957 | FALSE | 1.006922 | FALSE | Photoreceptor          |
| CCTAACCC db/db1 | db/db | 4997 | 0.037564 | FALSE | 0.857271 | FALSE | Endothelia Venous EC   |
| CCTAACCT db/db1 | db/db | 1642 | 0.100845 | TRUE  | 4.989459 | FALSE |                        |
| CCTAACCT db/db1 | db/db | 802  | 0.038953 | FALSE | 2.745031 | FALSE | Neuron                 |
| CCTAAGA/db/db1  | db/db | 2221 | 0.128582 | TRUE  | 1.215237 | FALSE |                        |
| CCTAAGA/db/db1  | db/db | 1876 | 0.068864 | FALSE | 1.298753 | FALSE | Endothelia EC-C4       |
| CCTAAGAC/db/db1 | db/db | 470  | 0.014151 | FALSE | 0.20283  | FALSE | Photoreceptor          |
| CCTAAGAC/db/db1 | db/db | 486  | 0.063221 | FALSE | 12.22222 | TRUE  |                        |
| CCTAAGAC/db/db1 | db/db | 1831 | 0.057037 | FALSE | 1.522397 | FALSE | Photoreceptor          |
| CCTAAGAC/db/db1 | db/db | 8151 | 0.016181 | FALSE | 0.298018 | FALSE | Photoreceptor          |
| CCTAAGAC/db/db1 | db/db | 732  | 0.046906 | FALSE | 0.602138 | FALSE | Photoreceptor          |
| CCTAAGAT db/db1 | db/db | 2163 | 0.058205 | FALSE | 0.998263 | FALSE | Pericyte               |
| CCTAAGAT db/db1 | db/db | 588  | 0.046025 | FALSE | 1.261562 | FALSE | Photoreceptor          |
| CCTACGTA db/db1 | db/db | 3815 | 0.013605 | FALSE | 0.874659 | FALSE | Endothelia Capillary E |

|                 |       |      |          |       |          |       |                        |
|-----------------|-------|------|----------|-------|----------|-------|------------------------|
| CCTACGTA db/db1 | db/db | 480  | 0.013338 | FALSE | 0.95315  | FALSE | Photoreceptor          |
| CCTACGTC db/db1 | db/db | 3303 | 0.027273 | FALSE | 0.70591  | FALSE | Endothelia EC-C4       |
| CCTACGTC db/db1 | db/db | 7718 | 0.009712 | FALSE | 0.238986 | FALSE | Photoreceptor          |
| CCTACGTC db/db1 | db/db | 933  | 0.017114 | FALSE | 0.522923 | FALSE | Photoreceptor          |
| CCTACGTC db/db1 | db/db | 1590 | 0.060641 | FALSE | 1.608407 | FALSE | Endothelia Capillary E |
| CCTACGTC db/db1 | db/db | 883  | 0.046025 | FALSE | 0.779155 | FALSE | Photoreceptor          |
| CCTACGTC db/db1 | db/db | 923  | 0.039671 | FALSE | 1.199067 | FALSE | Photoreceptor          |
| CCTACGTT db/db1 | db/db | 1219 | 0.017434 | FALSE | 0.9536   | FALSE | Photoreceptor          |
| CCTACGTT db/db1 | db/db | 1124 | 0.135645 | TRUE  | 1.868365 | FALSE |                        |
| CCTATCGA db/db1 | db/db | 3756 | 0.034954 | FALSE | 0.811453 | FALSE | Photoreceptor          |
| CCTATCGA db/db1 | db/db | 3495 | 0.020536 | FALSE | 0.854323 | FALSE | Endothelia Venous EC   |
| CCTATCGC db/db1 | db/db | 6256 | 0.025868 | FALSE | 0.701494 | FALSE | Endothelia EC-C4       |
| CCTATCGC db/db1 | db/db | 1483 | 0.044326 | FALSE | 1.430609 | FALSE | Endothelia Capillary E |
| CCTATCGC db/db1 | db/db | 6657 | 0.296296 | TRUE  | 1.343553 | FALSE |                        |
| CCTATCGT db/db1 | db/db | 1380 | 0.022857 | FALSE | 0.915313 | FALSE | Photoreceptor          |
| CCTATCGT db/db1 | db/db | 2081 | 0.01981  | FALSE | 1.290678 | FALSE | Endothelia Capillary E |
| CCTCAACA db/db1 | db/db | 6514 | 0.034334 | FALSE | 0.755999 | FALSE | Photoreceptor          |
| CCTCAACC db/db1 | db/db | 7025 | 0.044326 | FALSE | 0.630092 | FALSE | Photoreceptor          |
| CCTCAACC db/db1 | db/db | 2216 | 0.047807 | FALSE | 1.065298 | FALSE | Endothelia Capillary E |
| CCTCAACC db/db1 | db/db | 576  | 0.093319 | FALSE | 0.693752 | FALSE | Photoreceptor          |
| CCTCAACC db/db1 | db/db | 2893 | 0.012814 | FALSE | 0.902369 | FALSE | Endothelia Capillary E |
| CCTCAACC db/db1 | db/db | 705  | 0.065957 | FALSE | 1.666266 | FALSE | Photoreceptor          |
| CCTCAACC db/db1 | db/db | 2128 | 0.020536 | FALSE | 1.067151 | FALSE | Endothelia Capillary E |
| CCTCAACC db/db1 | db/db | 991  | 0.032546 | FALSE | 1.074917 | FALSE | Endothelia Capillary E |
| CCTCAACT db/db1 | db/db | 2261 | 0.080645 | FALSE | 1.008181 | FALSE | Endothelia Venous EC   |
| CCTCAACT db/db1 | db/db | 3728 | 0.01981  | FALSE | 0.943119 | FALSE | Photoreceptor          |
| CCTCAACT db/db1 | db/db | 8179 | 0.014151 | FALSE | 0.382679 | FALSE | Photoreceptor          |
| CCTCACAA db/db1 | db/db | 1646 | 0.01981  | FALSE | 0.97773  | FALSE | Endothelia EC-C4       |
| CCTCACAC db/db1 | db/db | 3016 | 0.068864 | FALSE | 1.62545  | FALSE | Neuron                 |
| CCTCACAC db/db1 | db/db | 2741 | 0.073582 | FALSE | 0.96781  | FALSE | Photoreceptor          |
| CCTCACAG db/db1 | db/db | 6667 | 0.018761 | FALSE | 0.249606 | FALSE | Photoreceptor          |
| CCTCACAG db/db1 | db/db | 465  | 0.038251 | FALSE | 0.205946 | FALSE | Photoreceptor          |
| CCTCACAG db/db1 | db/db | 3179 | 0.252153 | TRUE  | 3.714243 | FALSE |                        |
| CCTCACAT db/db1 | db/db | 2417 | 0.018088 | FALSE | 0.892991 | FALSE | Endothelia Venous EC   |
| CCTCAGTA db/db1 | db/db | 1879 | 0.060641 | FALSE | 1.302685 | FALSE | Endothelia Capillary E |
| CCTCAGTA db/db1 | db/db | 1002 | 0.019455 | FALSE | 0.987758 | FALSE | Muller cell            |
| CCTCAGTA db/db1 | db/db | 1869 | 0.122388 | TRUE  | 1.382656 | FALSE |                        |
| CCTCAGTC db/db1 | db/db | 737  | 0.075259 | FALSE | 2.26327  | FALSE | Muller cell            |
| CCTCAGTC db/db1 | db/db | 859  | 0.016799 | FALSE | 1.824015 | FALSE | Endothelia Capillary E |
| CCTCAGTC db/db1 | db/db | 1969 | 0.022455 | FALSE | 1.205087 | FALSE | Endothelia Capillary E |
| CCTCAGTC db/db1 | db/db | 548  | 0.026796 | FALSE | 0.167299 | FALSE | Photoreceptor          |
| CCTCAGTC db/db1 | db/db | 1615 | 0.061912 | FALSE | 1.271388 | FALSE | Photoreceptor          |
| CCTCAGTC db/db1 | db/db | 5971 | 0.044326 | FALSE | 0.634973 | FALSE | Photoreceptor          |
| CCTCAGTT db/db1 | db/db | 2094 | 0.027758 | FALSE | 0.487208 | FALSE | Neuron                 |
| CCTCAGTT db/db1 | db/db | 1464 | 0.016799 | FALSE | 1.699065 | FALSE | Endothelia Capillary E |
| CCTCATGA db/db1 | db/db | 403  | 0.073582 | FALSE | 2.772562 | FALSE | Muller cell            |
| CCTCATGA db/db1 | db/db | 657  | 0.045165 | FALSE | 2.606939 | FALSE | Muller cell            |

|                 |       |      |          |       |          |       |                        |
|-----------------|-------|------|----------|-------|----------|-------|------------------------|
| CCTCATGC db/db1 | db/db | 1477 | 0.047807 | FALSE | 1.606161 | FALSE | Photoreceptor          |
| CCTCATGC db/db1 | db/db | 904  | 0.015879 | FALSE | 0.590553 | FALSE | Photoreceptor          |
| CCTCATGC db/db1 | db/db | 1252 | 0.027273 | FALSE | 1.559606 | FALSE | Endothelia Capillary E |
| CCTCATGC db/db1 | db/db | 1444 | 0.03313  | FALSE | 1.695479 | FALSE | Endothelia Capillary E |
| CCTCATGC db/db1 | db/db | 2446 | 0.015287 | FALSE | 0.908103 | FALSE | Endothelia Capillary E |
| CCTCATGC db/db1 | db/db | 1423 | 0.039671 | FALSE | 1.42248  | FALSE | Photoreceptor          |
| CCTCATGC db/db1 | db/db | 459  | 0.026328 | FALSE | 1.149905 | FALSE | Microglia              |
| CCTCATGC db/db1 | db/db | 2609 | 0.068864 | FALSE | 1.22666  | FALSE | Photoreceptor          |
| CCTCCAAA db/db1 | db/db | 436  | 0.115641 | TRUE  | 3.608247 | FALSE |                        |
| CCTCCAAA db/db1 | db/db | 815  | 0.146004 | TRUE  | 3.911267 | FALSE |                        |
| CCTCCAAC db/db1 | db/db | 6274 | 0.022059 | FALSE | 0.635549 | FALSE | Photoreceptor          |
| CCTCCAAC db/db1 | db/db | 626  | 0.03313  | FALSE | 0.443552 | FALSE | Photoreceptor          |
| CCTCCAAC db/db1 | db/db | 1009 | 0.008032 | FALSE | 1.233298 | FALSE | Endothelia Capillary E |
| CCTCCAAT db/db1 | db/db | 3279 | 0.049679 | FALSE | 1.336091 | FALSE | Photoreceptor          |
| CCTCCAAT db/db1 | db/db | 6635 | 0.022857 | FALSE | 0.774972 | FALSE | Photoreceptor          |
| CCTCCTCA db/db1 | db/db | 6771 | 0.088776 | FALSE | 0.582668 | FALSE | Neuron                 |
| CCTCCTCA db/db1 | db/db | 3368 | 0.024971 | FALSE | 0.948518 | FALSE | Photoreceptor          |
| CCTCCTCC db/db1 | db/db | 622  | 0.126437 | TRUE  | 3.86681  | FALSE |                        |
| CCTCCTCG db/db1 | db/db | 4728 | 0.192271 | TRUE  | 2.365608 | FALSE |                        |
| CCTCCTCG db/db1 | db/db | 792  | 0.058205 | FALSE | 2.102386 | FALSE | Photoreceptor          |
| CCTCCTCT db/db1 | db/db | 4296 | 0.020171 | FALSE | 0.69854  | FALSE | Endothelia Capillary E |
| CCTCTAGA db/db1 | db/db | 562  | 0.012303 | FALSE | 1.726493 | FALSE | Endothelia EC-C4       |
| CCTCTAGC db/db1 | db/db | 890  | 0.012814 | FALSE | 1.676383 | FALSE | Endothelia Capillary E |
| CCTCTAGC db/db1 | db/db | 432  | 0.037564 | FALSE | 2.295959 | FALSE | Endothelia Capillary E |
| CCTCTAGC db/db1 | db/db | 1010 | 0.075259 | FALSE | 1.422736 | FALSE | Muller cell            |
| CCTCTAGC db/db1 | db/db | 477  | 0.020908 | FALSE | 0.998723 | FALSE | Photoreceptor          |
| CCTCTAGC db/db1 | db/db | 2254 | 0.078788 | FALSE | 1.363198 | FALSE | Endothelia Capillary E |
| CCTCTAGT db/db1 | db/db | 3376 | 0.076994 | FALSE | 1.279221 | FALSE | Photoreceptor          |
| CCTCTCCA db/db1 | db/db | 2967 | 0.020536 | FALSE | 0.76572  | FALSE | Photoreceptor          |
| CCTCTCCA db/db1 | db/db | 2495 | 0.115641 | TRUE  | 1.31579  | FALSE |                        |
| CCTCTCCC db/db1 | db/db | 4709 | 0.030859 | FALSE | 0.697424 | FALSE | Photoreceptor          |
| CCTCTCCC db/db1 | db/db | 3886 | 0.058205 | FALSE | 1.060645 | FALSE | Endothelia Capillary E |
| CCTCTCCC db/db1 | db/db | 9021 | 0.012052 | FALSE | 0.552108 | FALSE | Photoreceptor          |
| CCTCTCCG db/db1 | db/db | 3255 | 0.024534 | FALSE | 1.001931 | FALSE | Endothelia Venous EC   |
| CCTCTCCG db/db1 | db/db | 3119 | 0.008852 | FALSE | 0.817282 | FALSE | Neuron                 |
| CCTCTCCG db/db1 | db/db | 1634 | 0.033726 | FALSE | 0.928313 | FALSE | Neuron                 |
| CCTCTCCT db/db1 | db/db | 495  | 0.019106 | FALSE | 0.500236 | FALSE | Photoreceptor          |
| CCTGCATA db/db1 | db/db | 1496 | 0.038953 | FALSE | 1.156985 | FALSE | Neuron                 |
| CCTGCATC db/db1 | db/db | 407  | 0.065957 | FALSE | 2.466352 | FALSE | Endothelia Capillary E |
| CCTGCATC db/db1 | db/db | 1278 | 0.026328 | FALSE | 0.471551 | FALSE | Photoreceptor          |
| CCTGCATC db/db1 | db/db | 909  | 0.019455 | FALSE | 2.548055 | FALSE | Photoreceptor          |
| CCTGCATC db/db1 | db/db | 3403 | 0.164835 | TRUE  | 2.32342  | FALSE |                        |
| CCTGCATT db/db1 | db/db | 2801 | 0.020171 | FALSE | 0.523633 | FALSE | Photoreceptor          |
| CCTGCATT db/db1 | db/db | 3200 | 0.031973 | FALSE | 1.011347 | FALSE | Endothelia Aterial EC  |
| CCTGTTGA db/db1 | db/db | 1867 | 0.011805 | FALSE | 1.268213 | FALSE | Photoreceptor          |
| CCTGTTGC db/db1 | db/db | 407  | 0.052669 | FALSE | 2.048939 | FALSE | Neuron                 |
| CCTGTTGC db/db1 | db/db | 1268 | 0.104679 | TRUE  | 3.12115  | FALSE |                        |

|                 |       |      |          |       |          |       |                         |
|-----------------|-------|------|----------|-------|----------|-------|-------------------------|
| CCTGTTGC db/db1 | db/db | 229  | 0.110901 | TRUE  | 4.458599 | FALSE |                         |
| CCTGTTGC db/db1 | db/db | 3468 | 0.018422 | FALSE | 0.876824 | FALSE | Endothelia Capillary EC |
| CCTGTTGC db/db1 | db/db | 4147 | 0.061912 | FALSE | 1.147309 | FALSE | Photoreceptor           |
| CCTGTTGT db/db1 | db/db | 983  | 0.08663  | FALSE | 1.219056 | FALSE | Photoreceptor           |
| CCTGTTGT db/db1 | db/db | 3850 | 0.016799 | FALSE | 0.632575 | FALSE | Photoreceptor           |
| CCTGTTGT db/db1 | db/db | 366  | 0.04192  | FALSE | 4.518382 | FALSE | Muller cell             |
| CCTGTTGT db/db1 | db/db | 1743 | 0.049679 | FALSE | 0.967098 | FALSE | Endothelia Capillary EC |
| CCTGTTGT db/db1 | db/db | 2166 | 0.036891 | FALSE | 1.337788 | FALSE | Muller cell             |
| CCTTCAGA db/db1 | db/db | 1191 | 0.039671 | FALSE | 1.141486 | FALSE | Photoreceptor           |
| CCTTCAGA db/db1 | db/db | 1937 | 0.042704 | FALSE | 0.723823 | FALSE | Photoreceptor           |
| CCTTCAGA db/db1 | db/db | 902  | 0.119568 | TRUE  | 4.005935 | FALSE |                         |
| CCTTCAGA db/db1 | db/db | 3122 | 0.021286 | FALSE | 1.211267 | FALSE | Endothelia Capillary EC |
| CCTTCAGC db/db1 | db/db | 6052 | 0.031411 | FALSE | 0.776947 | FALSE | Photoreceptor           |
| CCTTCAGC db/db1 | db/db | 1013 | 0.021669 | FALSE | 2.296615 | FALSE | Muller cell             |
| CCTTCAGC db/db1 | db/db | 964  | 0.063221 | FALSE | 1.185788 | FALSE | Photoreceptor           |
| CCTTCAGC db/db1 | db/db | 864  | 0.048732 | FALSE | 1.26085  | FALSE | Photoreceptor           |
| CCTTCAGT db/db1 | db/db | 3588 | 0.031973 | FALSE | 1.046836 | FALSE | Photoreceptor           |
| CCTTGTGA db/db1 | db/db | 1969 | 0.030859 | FALSE | 1.264408 | FALSE | Endothelia Aterial EC   |
| CCTTGTGA db/db1 | db/db | 1370 | 0.044326 | FALSE | 1.884543 | FALSE | Photoreceptor           |
| CCTTGTGC db/db1 | db/db | 2028 | 0.016181 | FALSE | 0.384316 | FALSE | Photoreceptor           |
| CCTTGTGC db/db1 | db/db | 1923 | 0.109375 | TRUE  | 2.828763 | FALSE |                         |
| CCTTGTGC db/db1 | db/db | 972  | 0.043505 | FALSE | 1.315446 | FALSE | Photoreceptor           |
| CCTTGTGC db/db1 | db/db | 3311 | 0.030318 | FALSE | 0.914481 | FALSE | Endothelia Venous EC    |
| CCTTGTGC db/db1 | db/db | 3658 | 0.109375 | TRUE  | 2.254181 | FALSE |                         |
| CCTTGTGC db/db1 | db/db | 1886 | 0.024105 | FALSE | 0.740358 | FALSE | Photoreceptor           |
| CCTTGTGT db/db1 | db/db | 2187 | 0.020536 | FALSE | 0.948591 | FALSE | Endothelia Aterial EC   |
| CCTTGTGT db/db1 | db/db | 1524 | 0.006137 | FALSE | 1.095255 | FALSE | Endothelia Capillary EC |
| CCTTGTGT db/db1 | db/db | 963  | 0.020536 | FALSE | 1.477569 | FALSE | Endothelia EC-C4        |
| CCTTTGGA db/db1 | db/db | 3175 | 0.028251 | FALSE | 0.816354 | FALSE | Endothelia Capillary EC |
| CCTTTGGC db/db1 | db/db | 1232 | 0.030859 | FALSE | 1.071373 | FALSE | Endothelia Capillary EC |
| CCTTTGGC db/db1 | db/db | 1152 | 0.040404 | FALSE | 0.799918 | FALSE | Photoreceptor           |
| CCTTTGGC db/db1 | db/db | 1486 | 0.093319 | FALSE | 3.009491 | FALSE | Muller cell             |
| CCTTTGGT db/db1 | db/db | 3499 | 0.020536 | FALSE | 0.680179 | FALSE | Photoreceptor           |
| CCTTTGGT db/db1 | db/db | 686  | 0.022059 | FALSE | 3.3195   | FALSE | Neuron                  |
| CCTTTGGT db/db1 | db/db | 577  | 0.036232 | FALSE | 2.756444 | FALSE | Neuron                  |
| CGAAGGA db/db1  | db/db | 2126 | 0.051646 | FALSE | 0.813527 | FALSE | Photoreceptor           |
| CGAAGGA db/db1  | db/db | 3378 | 0.058205 | FALSE | 1.049594 | FALSE | Endothelia Capillary EC |
| CGAAGGA db/db1  | db/db | 1272 | 0.125386 | TRUE  | 2.098585 | FALSE |                         |
| CGAAGGA db/db1  | db/db | 2737 | 0.007058 | FALSE | 0.822876 | FALSE | Photoreceptor           |
| CGAAGGA db/db1  | db/db | 1420 | 0.015287 | FALSE | 0.381602 | FALSE | Photoreceptor           |
| CGAAGGA db/db1  | db/db | 358  | 0.035586 | FALSE | 4.961212 | FALSE | Photoreceptor           |
| CGAAGGA db/db1  | db/db | 6132 | 0.53202  | TRUE  | 1.615646 | FALSE |                         |
| CGAAGGA db/db1  | db/db | 2255 | 0.03313  | FALSE | 1.197646 | FALSE | Endothelia Venous EC    |
| CGAAGTT db/db1  | db/db | 376  | 0.126437 | TRUE  | 2.891933 | FALSE |                         |
| CGAAGTT db/db1  | db/db | 4096 | 0.022857 | FALSE | 1.054835 | FALSE | Photoreceptor           |
| CGAAGTT db/db1  | db/db | 3478 | 0.08663  | FALSE | 1.072207 | FALSE | Photoreceptor           |
| CGAAGTT db/db1  | db/db | 1380 | 0.055901 | FALSE | 1.565487 | FALSE | Photoreceptor           |



|                 |       |      |          |       |          |       |                        |
|-----------------|-------|------|----------|-------|----------|-------|------------------------|
| CGAAGTT( db/db1 | db/db | 2518 | 0.013338 | FALSE | 1.162311 | FALSE | Endothelia Capillary E |
| CGAAGTT( db/db1 | db/db | 1502 | 0.020171 | FALSE | 1.530905 | FALSE | Endothelia EC-C4       |
| CGAAGTTI db/db1 | db/db | 617  | 0.028251 | FALSE | 1.66807  | FALSE | Endothelia Capillary E |
| CGAAGTTI db/db1 | db/db | 1516 | 0.046906 | FALSE | 1.290831 | FALSE | Photoreceptor          |
| CGAAGTTI db/db1 | db/db | 3898 | 0.035586 | FALSE | 1.14893  | FALSE | Photoreceptor          |
| CGAAGTTI db/db1 | db/db | 3864 | 0.24     | TRUE  | 2.371928 | FALSE |                        |
| CGAAGTTI db/db1 | db/db | 571  | 0.041154 | FALSE | 1.250263 | FALSE | Photoreceptor          |
| CGAATTG/ db/db1 | db/db | 971  | 0.039671 | FALSE | 1.958905 | FALSE | Photoreceptor          |
| CGAATTG( db/db1 | db/db | 4724 | 0.022455 | FALSE | 0.554084 | FALSE | Photoreceptor          |
| CGAATTG( db/db1 | db/db | 1458 | 0.058205 | FALSE | 1.429427 | FALSE | Pericyte               |
| CGAATTG( db/db1 | db/db | 303  | 0.108718 | TRUE  | 0.847009 | FALSE |                        |
| CGAATTGI db/db1 | db/db | 753  | 0.088776 | FALSE | 1.761829 | FALSE | Endothelia Capillary E |
| CGAATTGI db/db1 | db/db | 2548 | 0.070386 | FALSE | 1.190414 | FALSE | Photoreceptor          |
| CGACAGC/ db/db1 | db/db | 733  | 0.018422 | FALSE | 0.250985 | FALSE | Photoreceptor          |
| CGACAGC/ db/db1 | db/db | 620  | 0.078788 | FALSE | 2.146618 | FALSE | Muller cell            |
| CGACAGC( db/db1 | db/db | 1130 | 0.045165 | FALSE | 1.251213 | FALSE | Muller cell            |
| CGACAGC( db/db1 | db/db | 2575 | 0.030859 | FALSE | 1.031771 | FALSE | Endothelia Venous EC   |
| CGACAGC( db/db1 | db/db | 570  | 0.025868 | FALSE | 1.345912 | FALSE | Microglia              |
| CGACAGC( db/db1 | db/db | 647  | 0.146004 | TRUE  | 4.149378 | FALSE |                        |
| CGACAGC( db/db1 | db/db | 5464 | 0.029787 | FALSE | 0.637278 | FALSE | Photoreceptor          |
| CGACAGC( db/db1 | db/db | 1133 | 0.032546 | FALSE | 1.558164 | FALSE | Photoreceptor          |
| CGACAGC  db/db1 | db/db | 2963 | 0.177638 | TRUE  | 5.136416 | TRUE  |                        |
| CGAGAAG, db/db1 | db/db | 3702 | 0.018422 | FALSE | 0.777657 | FALSE | Endothelia EC-C4       |
| CGAGAAG, db/db1 | db/db | 1699 | 0.008438 | FALSE | 1.217584 | FALSE | Endothelia Capillary E |
| CGAGAAG, db/db1 | db/db | 2229 | 0.042704 | FALSE | 1.391158 | FALSE | Microglia              |
| CGAGAAG, db/db1 | db/db | 4491 | 0.036891 | FALSE | 1.052224 | FALSE | Photoreceptor          |
| CGAGAAG, db/db1 | db/db | 4566 | 0.030859 | FALSE | 0.820993 | FALSE | Endothelia Venous EC   |
| CGAGAAG, db/db1 | db/db | 493  | 0.15354  | TRUE  | 2.597403 | FALSE |                        |
| CGAGAAG, db/db1 | db/db | 585  | 0.037564 | FALSE | 3.143776 | FALSE | Endothelia Capillary E |
| CGAGAAG` db/db1 | db/db | 772  | 0.020171 | FALSE | 0.46846  | FALSE | Photoreceptor          |
| CGAGGAA, db/db1 | db/db | 3348 | 0.017114 | FALSE | 0.801942 | FALSE | Endothelia EC-C4       |
| CGAGGAA, db/db1 | db/db | 638  | 0.017434 | FALSE | 2.395646 | FALSE | Pericyte               |
| CGAGGAA, db/db1 | db/db | 565  | 0.034334 | FALSE | 1.503955 | FALSE | Photoreceptor          |
| CGAGGAA, db/db1 | db/db | 6442 | 0.013605 | FALSE | 0.686109 | FALSE | Photoreceptor          |
| CGAGGAA, db/db1 | db/db | 864  | 0.038953 | FALSE | 1.684057 | FALSE | Photoreceptor          |
| CGAGGAA` db/db1 | db/db | 701  | 0.068864 | FALSE | 1.488014 | FALSE | Photoreceptor          |
| CGAGGAA` db/db1 | db/db | 445  | 0.028754 | FALSE | 2.33755  | FALSE | Photoreceptor          |
| CGAGGAA` db/db1 | db/db | 7178 | 0.032546 | FALSE | 0.691834 | FALSE | Photoreceptor          |
| CGAGGCT/ db/db1 | db/db | 701  | 0.037564 | FALSE | 1.65511  | FALSE | Photoreceptor          |
| CGAGGCT/ db/db1 | db/db | 375  | 0.018422 | FALSE | 0.87438  | FALSE | Endothelia Capillary E |
| CGAGGCT( db/db1 | db/db | 822  | 0.047807 | FALSE | 1.803593 | FALSE | Endothelia Capillary E |
| CGAGGCT( db/db1 | db/db | 896  | 0.029787 | FALSE | 0.585394 | FALSE | Photoreceptor          |
| CGAGGCT( db/db1 | db/db | 1842 | 0.019455 | FALSE | 1.464895 | FALSE | Endothelia Aterial EC  |
| CGAGGCT( db/db1 | db/db | 5449 | 0.057037 | FALSE | 1.003358 | FALSE | Endothelia Venous EC   |
| CGAGGCT  db/db1 | db/db | 2103 | 0.148377 | TRUE  | 1.606569 | FALSE |                        |
| CGAGGCT  db/db1 | db/db | 2574 | 0.017114 | FALSE | 1.323872 | FALSE | Photoreceptor          |
| CGAGTGC/ db/db1 | db/db | 769  | 0.029787 | FALSE | 1.994486 | FALSE | Endothelia Capillary E |

|                 |       |      |          |       |          |       |                        |
|-----------------|-------|------|----------|-------|----------|-------|------------------------|
| CGAGTGC/db/db1  | db/db | 2219 | 0.032546 | FALSE | 0.450218 | FALSE | Photoreceptor          |
| CGAGTGC/db/db1  | db/db | 8659 | 0.016799 | FALSE | 0.476149 | FALSE | Photoreceptor          |
| CGAGTGC/db/db1  | db/db | 1485 | 0.022857 | FALSE | 0.849143 | FALSE | Photoreceptor          |
| CGAGTGC/db/db1  | db/db | 620  | 0.043505 | FALSE | 0.713152 | FALSE | Neuron                 |
| CGAGTGC/db/db1  | db/db | 1000 | 0.015879 | FALSE | 1.400521 | FALSE | Pericyte               |
| CGAGTGC/db/db1  | db/db | 2358 | 0.065957 | FALSE | 1.495878 | FALSE | Photoreceptor          |
| CGAGTGC/db/db1  | db/db | 2262 | 0.051646 | FALSE | 1.098117 | FALSE | Photoreceptor          |
| CGAGTGC/db/db1  | db/db | 701  | 0.075259 | FALSE | 2.505751 | FALSE | Photoreceptor          |
| CGAGTTAT/db/db1 | db/db | 4941 | 0.013074 | FALSE | 0.397218 | FALSE | Photoreceptor          |
| CGAGTTAT/db/db1 | db/db | 1380 | 0.016799 | FALSE | 1.366033 | FALSE | Endothelia Aterial EC  |
| CGAGTTAT/db/db1 | db/db | 464  | 0.035586 | FALSE | 0.745613 | FALSE | Photoreceptor          |
| CGAGTTAT/db/db1 | db/db | 4133 | 0.048732 | FALSE | 0.972767 | FALSE | Photoreceptor          |
| CGATCGG/db/db1  | db/db | 3393 | 0.53202  | TRUE  | 1.775064 | FALSE |                        |
| CGATCGG/db/db1  | db/db | 948  | 0.067388 | FALSE | 6.754967 | TRUE  |                        |
| CGATCGG/db/db1  | db/db | 679  | 0.048732 | FALSE | 1.069945 | FALSE | Photoreceptor          |
| CGATCGG/db/db1  | db/db | 3142 | 0.021286 | FALSE | 0.947875 | FALSE | Photoreceptor          |
| CGATGCG/db/db1  | db/db | 4273 | 0.024971 | FALSE | 0.8399   | FALSE | Endothelia Venous EC   |
| CGATGCG/db/db1  | db/db | 7181 | 0.067388 | FALSE | 0.702999 | FALSE | Photoreceptor          |
| CGATGCG/db/db1  | db/db | 3959 | 0.023266 | FALSE | 0.698606 | FALSE | Endothelia EC-C4       |
| CGATGCG/db/db1  | db/db | 1547 | 0.031411 | FALSE | 0.993821 | FALSE | Photoreceptor          |
| CGATGCG/db/db1  | db/db | 461  | 0.036232 | FALSE | 2.659142 | FALSE | Endothelia Capillary E |
| CGATGCG/db/db1  | db/db | 1035 | 0.068864 | FALSE | 1.634037 | FALSE | Photoreceptor          |
| CGATGCG/db/db1  | db/db | 1258 | 0.047807 | FALSE | 1.433756 | FALSE | Photoreceptor          |
| CGATGCG/db/db1  | db/db | 1950 | 0.029787 | FALSE | 1.566246 | FALSE | Endothelia Venous EC   |
| CGATGCG/db/db1  | db/db | 2036 | 0.020171 | FALSE | 0.14063  | FALSE | Photoreceptor          |
| CGATGGC/db/db1  | db/db | 472  | 0.052669 | FALSE | 2.364438 | FALSE | Photoreceptor          |
| CGATGGC/db/db1  | db/db | 2254 | 0.061912 | FALSE | 0.92939  | FALSE | Photoreceptor          |
| CGATGGC/db/db1  | db/db | 1323 | 0.130259 | TRUE  | 1.162791 | FALSE |                        |
| CGATGGC/db/db1  | db/db | 376  | 0.043505 | FALSE | 2.391304 | FALSE | Endothelia Capillary E |
| CGATGGC/db/db1  | db/db | 2202 | 0.014429 | FALSE | 1.03853  | FALSE | Endothelia Venous EC   |
| CGATGGC/db/db1  | db/db | 5372 | 0.031973 | FALSE | 0.766545 | FALSE | Endothelia Capillary E |
| CGATGGC/db/db1  | db/db | 762  | 0.102807 | TRUE  | 2.854512 | FALSE |                        |
| CGATGGC/db/db1  | db/db | 2053 | 0.020536 | FALSE | 0.940107 | FALSE | Endothelia Venous EC   |
| CGATGGC/db/db1  | db/db | 3171 | 0.052669 | FALSE | 1.100349 | FALSE | Endothelia Venous EC   |
| CGATGGC/db/db1  | db/db | 1066 | 0.029787 | FALSE | 1.705931 | FALSE | Microglia              |
| CGATGGC/db/db1  | db/db | 816  | 0.022455 | FALSE | 2.013465 | FALSE | Endothelia Capillary E |
| CGATGGC/db/db1  | db/db | 436  | 0.076994 | FALSE | 4.904356 | FALSE | Muller cell            |
| CGCAGGT/db/db1  | db/db | 912  | 0.068864 | FALSE | 0.997957 | FALSE | Photoreceptor          |
| CGCAGGT/db/db1  | db/db | 4449 | 0.045165 | FALSE | 1.039378 | FALSE | Photoreceptor          |
| CGCAGGT/db/db1  | db/db | 526  | 0.034334 | FALSE | 2.251935 | FALSE | Neuron                 |
| CGCAGGT/db/db1  | db/db | 2842 | 0.021669 | FALSE | 0.794139 | FALSE | Endothelia Venous EC   |
| CGCAGGT/db/db1  | db/db | 4391 | 0.036232 | FALSE | 1.066741 | FALSE | Photoreceptor          |
| CGCAGGT/db/db1  | db/db | 2158 | 0.073582 | FALSE | 1.514253 | FALSE | Photoreceptor          |
| CGCAGGT/db/db1  | db/db | 1574 | 0.026328 | FALSE | 1.442951 | FALSE | Endothelia Capillary E |
| CGCAGGT/db/db1  | db/db | 3002 | 0.028251 | FALSE | 1.155251 | FALSE | Endothelia Capillary E |
| CGCAGGT/db/db1  | db/db | 1066 | 0.026328 | FALSE | 1.651641 | FALSE | Endothelia Capillary E |
| CGCAGGT/db/db1  | db/db | 4396 | 0.041154 | FALSE | 0.804735 | FALSE | Endothelia Venous EC   |

|                 |       |      |          |       |          |       |                        |
|-----------------|-------|------|----------|-------|----------|-------|------------------------|
| CGCATAAA db/db1 | db/db | 3749 | 0.130374 | TRUE  | 2.364475 | FALSE |                        |
| CGCATAAA db/db1 | db/db | 635  | 0.068864 | FALSE | 1.556362 | FALSE | Photoreceptor          |
| CGCATAAA db/db1 | db/db | 1433 | 0.064568 | FALSE | 1.417645 | FALSE | Photoreceptor          |
| CGCATAAC db/db1 | db/db | 7660 | 0.019455 | FALSE | 0.566712 | FALSE | Photoreceptor          |
| CGCATAAC db/db1 | db/db | 1602 | 0.017434 | FALSE | 0.582155 | FALSE | Photoreceptor          |
| CGCATAAC db/db1 | db/db | 3628 | 0.010846 | FALSE | 0.898945 | FALSE | Endothelia Capillary E |
| CGCATAAC db/db1 | db/db | 1098 | 0.017758 | FALSE | 1.131247 | FALSE | Endothelia Capillary E |
| CGCATAAC db/db1 | db/db | 691  | 0.052669 | FALSE | 0.792285 | FALSE | Photoreceptor          |
| CGCATGG db/db1  | db/db | 578  | 0.095727 | FALSE | 2.255792 | FALSE | Endothelia Capillary E |
| CGCATGG db/db1  | db/db | 7626 | 0.015287 | FALSE | 0.421451 | FALSE | Photoreceptor          |
| CGCATGG db/db1  | db/db | 696  | 0.091004 | FALSE | 0.529544 | FALSE | Photoreceptor          |
| CGCATGG db/db1  | db/db | 924  | 0.042704 | FALSE | 1.375602 | FALSE | Photoreceptor          |
| CGCATGG db/db1  | db/db | 2112 | 0.015879 | FALSE | 1.092491 | FALSE | Pericyte               |
| CGCATGG db/db1  | db/db | 955  | 0.112037 | TRUE  | 2.722559 | FALSE |                        |
| CGCATGG db/db1  | db/db | 7779 | 0.029266 | FALSE | 0.649362 | FALSE | Photoreceptor          |
| CGCATGG db/db1  | db/db | 3421 | 0.046906 | FALSE | 0.630734 | FALSE | Photoreceptor          |
| CGCATGG db/db1  | db/db | 2360 | 0.067388 | FALSE | 0.889931 | FALSE | Photoreceptor          |
| CGCATGG db/db1  | db/db | 2788 | 0.027758 | FALSE | 0.919035 | FALSE | Endothelia EC-C4       |
| CGCATGG db/db1  | db/db | 2543 | 0.016799 | FALSE | 1.127254 | FALSE | Endothelia Venous EC   |
| CGCATGG db/db1  | db/db | 2786 | 0.028251 | FALSE | 0.987956 | FALSE | Photoreceptor          |
| CGCATGG db/db1  | db/db | 427  | 0.071958 | FALSE | 3.140208 | FALSE | Endothelia Capillary E |
| CGCATGG db/db1  | db/db | 4518 | 0.031973 | FALSE | 0.927361 | FALSE | Photoreceptor          |
| CGCCAGAA db/db1 | db/db | 839  | 0.098234 | FALSE | 1.14307  | FALSE | Photoreceptor          |
| CGCCAGAA db/db1 | db/db | 4716 | 0.098234 | FALSE | 6.039238 | TRUE  |                        |
| CGCCAGAA db/db1 | db/db | 1169 | 0.070386 | FALSE | 0.912851 | FALSE | Photoreceptor          |
| CGCCAGAA db/db1 | db/db | 6020 | 0.130374 | TRUE  | 1.968398 | FALSE |                        |
| CGCCAGAA db/db1 | db/db | 8036 | 0.014711 | FALSE | 0.667936 | FALSE | Photoreceptor          |
| CGCCAGAA db/db1 | db/db | 2104 | 0.065957 | FALSE | 1.309122 | FALSE | Endothelia Capillary E |
| CGCCAGAA db/db1 | db/db | 1148 | 0.088776 | FALSE | 1.889866 | FALSE | Photoreceptor          |
| CGCCAGAA db/db1 | db/db | 1018 | 0.054795 | FALSE | 1.200819 | FALSE | Photoreceptor          |
| CGCCAGAA db/db1 | db/db | 1848 | 0.032546 | FALSE | 1.020361 | FALSE | Photoreceptor          |
| CGCCAGAA db/db1 | db/db | 2202 | 0.05065  | FALSE | 1.435742 | FALSE | Photoreceptor          |
| CGCCATTA db/db1 | db/db | 6744 | 0.019455 | FALSE | 0.657021 | FALSE | Photoreceptor          |
| CGCCATTA db/db1 | db/db | 465  | 0.103567 | TRUE  | 23.36182 | TRUE  |                        |
| CGCCATTC db/db1 | db/db | 5360 | 0.034954 | FALSE | 0.590639 | FALSE | Photoreceptor          |
| CGCCATTC db/db1 | db/db | 6349 | 0.023682 | FALSE | 0.757715 | FALSE | Photoreceptor          |
| CGCCATTC db/db1 | db/db | 1057 | 0.068864 | FALSE | 1.307721 | FALSE | Photoreceptor          |
| CGCCATTT db/db1 | db/db | 7606 | 0.029266 | FALSE | 1.032572 | FALSE | Photoreceptor          |
| CGCCATTT db/db1 | db/db | 2372 | 0.021286 | FALSE | 1.157166 | FALSE | Endothelia Capillary E |
| CGCCATTT db/db1 | db/db | 4542 | 0.022857 | FALSE | 0.801431 | FALSE | Photoreceptor          |
| CGCGTGA db/db1  | db/db | 1880 | 0.012814 | FALSE | 1.262532 | FALSE | Endothelia EC-C4       |
| CGCGTGA db/db1  | db/db | 3455 | 0.018761 | FALSE | 0.917588 | FALSE | Endothelia Venous EC   |
| CGCGTGA db/db1  | db/db | 635  | 0.020171 | FALSE | 1.221902 | FALSE | Photoreceptor          |
| CGCGTGA db/db1  | db/db | 956  | 0.005782 | FALSE | 1.449627 | FALSE | Pericyte               |
| CGCGTGA db/db1  | db/db | 1732 | 0.011081 | FALSE | 1.018434 | FALSE | Endothelia Aterial EC  |
| CGCGTGA db/db1  | db/db | 2755 | 0.033726 | FALSE | 1.065665 | FALSE | Photoreceptor          |
| CGGAACCA db/db1 | db/db | 772  | 0.053718 | FALSE | 1.149222 | FALSE | Photoreceptor          |

|               |       |      |          |       |          |       |                        |
|---------------|-------|------|----------|-------|----------|-------|------------------------|
| CGGAACC/d/db1 | db/db | 745  | 0.057037 | FALSE | 1.760555 | FALSE | Photoreceptor          |
| CGGAACC/d/db1 | db/db | 496  | 0.057037 | FALSE | 2.514307 | FALSE | Photoreceptor          |
| CGGAACC/d/db1 | db/db | 849  | 0.033726 | FALSE | 2.291773 | FALSE | Photoreceptor          |
| CGGAACC/d/db1 | db/db | 1930 | 0.032546 | FALSE | 1.310324 | FALSE | Endothelia Capillary E |
| CGGAACC/d/db1 | db/db | 669  | 0.012303 | FALSE | 2.078258 | FALSE | Endothelia Capillary E |
| CGGAACC/d/db1 | db/db | 2314 | 0.078788 | FALSE | 7.504735 | TRUE  |                        |
| CGGAACC/d/db1 | db/db | 4342 | 0.057037 | FALSE | 0.708175 | FALSE | Photoreceptor          |
| CGGAATT/d/db1 | db/db | 5585 | 0.138889 | TRUE  | 2.066791 | FALSE |                        |
| CGGAATT/d/db1 | db/db | 6116 | 0.032546 | FALSE | 0.164975 | FALSE | Photoreceptor          |
| CGGAATT/d/db1 | db/db | 952  | 0.093319 | FALSE | 6.206896 | TRUE  |                        |
| CGGAATT/d/db1 | db/db | 1431 | 0.088776 | FALSE | 1.086964 | FALSE | Pericyte               |
| CGGAATT/d/db1 | db/db | 498  | 0.011319 | FALSE | 3.407434 | FALSE | Endothelia Capillary E |
| CGGAATT/d/db1 | db/db | 1643 | 0.030859 | FALSE | 1.194949 | FALSE | Photoreceptor          |
| CGGAATT/d/db1 | db/db | 1246 | 0.103567 | TRUE  | 2.657602 | FALSE |                        |
| CGGAATT/d/db1 | db/db | 4051 | 0.061912 | FALSE | 0.6656   | FALSE | Endothelia Venous EC   |
| CGGACAC/d/db1 | db/db | 1193 | 0.024105 | FALSE | 1.423259 | FALSE | Endothelia Capillary E |
| CGGACAC/d/db1 | db/db | 932  | 0.018761 | FALSE | 2.035415 | FALSE | Endothelia Capillary E |
| CGGACAC/d/db1 | db/db | 987  | 0.013876 | FALSE | 1.343047 | FALSE | Endothelia Capillary E |
| CGGACAC/d/db1 | db/db | 4399 | 0.296296 | TRUE  | 4.200744 | FALSE |                        |
| CGGACAC/d/db1 | db/db | 3137 | 0.037564 | FALSE | 0.907301 | FALSE | Photoreceptor          |
| CGGACAC/d/db1 | db/db | 922  | 0.048732 | FALSE | 1.434265 | FALSE | Photoreceptor          |
| CGGACAC/d/db1 | db/db | 5195 | 0.030859 | FALSE | 0.910307 | FALSE | Endothelia Venous EC   |
| CGGACAC/d/db1 | db/db | 402  | 0.006683 | FALSE | 1.251162 | FALSE | Endothelia Capillary E |
| CGGACAC/d/db1 | db/db | 865  | 0.048732 | FALSE | 2.231652 | FALSE | Photoreceptor          |
| CGGACAC/d/db1 | db/db | 4926 | 0.148377 | TRUE  | 2.07057  | FALSE |                        |
| CGGAGAA/d/db1 | db/db | 434  | 0.033726 | FALSE | 2.786231 | FALSE | Photoreceptor          |
| CGGAGAA/d/db1 | db/db | 3131 | 0.059406 | FALSE | 0.707214 | FALSE | Endothelia Venous EC   |
| CGGAGAA/d/db1 | db/db | 2994 | 0.035586 | FALSE | 0.958882 | FALSE | Endothelia Venous EC   |
| CGGAGAA/d/db1 | db/db | 550  | 0.103732 | TRUE  | 2.361111 | FALSE |                        |
| CGGAGAA/d/db1 | db/db | 2344 | 0.146004 | TRUE  | 1.54202  | FALSE |                        |
| CGGAGAA/d/db1 | db/db | 2065 | 0.011805 | FALSE | 0.876525 | FALSE | Endothelia EC-C4       |
| CGGAGAA/d/db1 | db/db | 2889 | 0.021669 | FALSE | 0.494745 | FALSE | Photoreceptor          |
| CGGCAGT/d/db1 | db/db | 1446 | 0.131994 | TRUE  | 3.030303 | FALSE |                        |
| CGGCAGT/d/db1 | db/db | 812  | 0.009712 | FALSE | 1.535483 | FALSE | Endothelia Capillary E |
| CGGCAGT/d/db1 | db/db | 365  | 0.080645 | FALSE | 21.15028 | TRUE  |                        |
| CGGCAGT/d/db1 | db/db | 1613 | 0.038251 | FALSE | 1.493742 | FALSE | Endothelia Venous EC   |
| CGGCAGT/d/db1 | db/db | 1684 | 0.006683 | FALSE | 1.126522 | FALSE | Pericyte               |
| CGGCAGT/d/db1 | db/db | 7428 | 0.020171 | FALSE | 0.525351 | FALSE | Photoreceptor          |
| CGGCAGT/d/db1 | db/db | 1993 | 0.026796 | FALSE | 1.181107 | FALSE | Photoreceptor          |
| CGGGACT/d/db1 | db/db | 2676 | 0.022455 | FALSE | 1.020684 | FALSE | Endothelia Capillary E |
| CGGGACT/d/db1 | db/db | 445  | 0.054795 | FALSE | 2.225745 | FALSE | Endothelia Capillary E |
| CGGGACT/d/db1 | db/db | 1040 | 0.082569 | FALSE | 1.553791 | FALSE | Photoreceptor          |
| CGGGACT/d/db1 | db/db | 4907 | 0.057037 | FALSE | 0.908234 | FALSE | Endothelia Venous EC   |
| CGGGACT/d/db1 | db/db | 1988 | 0.051646 | FALSE | 0.937386 | FALSE | Endothelia Capillary E |
| CGGGACT/d/db1 | db/db | 1176 | 0.036891 | FALSE | 1.0718   | FALSE | Endothelia Capillary E |
| CGGGACT/d/db1 | db/db | 1597 | 0.073582 | FALSE | 1.430289 | FALSE | Endothelia Capillary E |
| CGGGCAT/d/db1 | db/db | 1638 | 0.070386 | FALSE | 0.928344 | FALSE | Photoreceptor          |

|                 |       |      |          |       |          |       |                        |
|-----------------|-------|------|----------|-------|----------|-------|------------------------|
| CGGGCAT/ db/db1 | db/db | 1641 | 0.025868 | FALSE | 1.395846 | FALSE | Endothelia EC-C4       |
| CGGGCAT( db/db1 | db/db | 2301 | 0.411992 | TRUE  | 2.608898 | FALSE |                        |
| CGGGCAT( db/db1 | db/db | 2776 | 0.046025 | FALSE | 0.83142  | FALSE | Microglia              |
| CGGGCAT( db/db1 | db/db | 3771 | 0.023266 | FALSE | 0.997678 | FALSE | Photoreceptor          |
| CGGGCAT( db/db1 | db/db | 541  | 0.05065  | FALSE | 2.11877  | FALSE | Endothelia Capillary E |
| CGGGCAT( db/db1 | db/db | 2252 | 0.036232 | FALSE | 1.003141 | FALSE | Endothelia Capillary E |
| CGGGCAT( db/db1 | db/db | 5461 | 0.073582 | FALSE | 0.855435 | FALSE | Endothelia EC-C4       |
| CGGGCAT db/db1  | db/db | 2533 | 0.073582 | FALSE | 0.798279 | FALSE | Photoreceptor          |
| CGGGCAT db/db1  | db/db | 608  | 0.022857 | FALSE | 1.462391 | FALSE | Endothelia EC-C4       |
| CGGGCAT db/db1  | db/db | 1912 | 0.03313  | FALSE | 1.30801  | FALSE | Endothelia Aterial EC  |
| CGGGTCA/ db/db1 | db/db | 947  | 0.314286 | TRUE  | 4.5961   | FALSE |                        |
| CGGGTCA( db/db1 | db/db | 1325 | 0.017758 | FALSE | 1.233537 | FALSE | Endothelia Capillary E |
| CGGGTCA( db/db1 | db/db | 1326 | 0.031973 | FALSE | 1.171591 | FALSE | Photoreceptor          |
| CGGGTCA( db/db1 | db/db | 1332 | 0.031973 | FALSE | 1.782348 | FALSE | Muller cell            |
| CGGGTCA( db/db1 | db/db | 3049 | 0.032546 | FALSE | 1.141983 | FALSE | Photoreceptor          |
| CGGGTCA( db/db1 | db/db | 1696 | 0.150727 | TRUE  | 0.239856 | FALSE |                        |
| CGGGTCA db/db1  | db/db | 2011 | 0.017114 | FALSE | 1.213756 | FALSE | Endothelia Capillary E |
| CGGGTCA db/db1  | db/db | 6274 | 0.24     | TRUE  | 0.625866 | FALSE |                        |
| CGGGTGT/ db/db1 | db/db | 1644 | 0.071958 | FALSE | 1.592393 | FALSE | Photoreceptor          |
| CGGGTGT( db/db1 | db/db | 7515 | 0.017114 | FALSE | 0.596209 | FALSE | Photoreceptor          |
| CGGGTGT( db/db1 | db/db | 997  | 0.025868 | FALSE | 0.759453 | FALSE | Photoreceptor          |
| CGGGTGT db/db1  | db/db | 689  | 0.010614 | FALSE | 1.41716  | FALSE | Endothelia Capillary E |
| CGGGTGT db/db1  | db/db | 968  | 0.007249 | FALSE | 0.886615 | FALSE | Endothelia Capillary E |
| CGGGTGT db/db1  | db/db | 3595 | 0.052669 | FALSE | 0.950194 | FALSE | Endothelia Venous EC   |
| CGGGTGT db/db1  | db/db | 763  | 0.046906 | FALSE | 2.252675 | FALSE | Endothelia Capillary E |
| CGGTCAG/ db/db1 | db/db | 2673 | 0.043505 | FALSE | 0.782791 | FALSE | Photoreceptor          |
| CGGTCAG( db/db1 | db/db | 3673 | 0.051646 | FALSE | 0.999842 | FALSE | Photoreceptor          |
| CGGTCAG( db/db1 | db/db | 3665 | 0.014997 | FALSE | 0.85901  | FALSE | Endothelia EC-C4       |
| CGGTCAG( db/db1 | db/db | 1721 | 0.052669 | FALSE | 0.884676 | FALSE | Photoreceptor          |
| CGGTCAG db/db1  | db/db | 690  | 0.064568 | FALSE | 2.044989 | FALSE | Endothelia Capillary E |
| CGGTCAG db/db1  | db/db | 666  | 0.024971 | FALSE | 1.016652 | FALSE | Neuron                 |
| CGGTCAG db/db1  | db/db | 2755 | 0.04192  | FALSE | 1.469375 | FALSE | Endothelia Venous EC   |
| CGGTCAG db/db1  | db/db | 845  | 0.031973 | FALSE | 0.215923 | FALSE | Photoreceptor          |
| CGGTCAG db/db1  | db/db | 777  | 0.101025 | TRUE  | 2.023121 | FALSE |                        |
| CGTAAGT( db/db1 | db/db | 2694 | 0.060641 | FALSE | 1.568238 | FALSE | Neuron                 |
| CGTAAGT( db/db1 | db/db | 524  | 0.014711 | FALSE | 3.380902 | FALSE | Photoreceptor          |
| CGTAAGT db/db1  | db/db | 3097 | 0.033726 | FALSE | 1.175952 | FALSE | Photoreceptor          |
| CGTAAGT db/db1  | db/db | 2168 | 0.067388 | FALSE | 1.342336 | FALSE | Pericyte               |
| CGTAATG/ db/db1 | db/db | 2125 | 0.036891 | FALSE | 1.286864 | FALSE | Endothelia EC-C4       |
| CGTAATG( db/db1 | db/db | 1438 | 0.014997 | FALSE | 1.041648 | FALSE | Photoreceptor          |
| CGTAATG( db/db1 | db/db | 4286 | 0.024971 | FALSE | 1.084201 | FALSE | Photoreceptor          |
| CGTAATG( db/db1 | db/db | 2155 | 0.014711 | FALSE | 1.104053 | FALSE | Endothelia Venous EC   |
| CGTAATG( db/db1 | db/db | 6273 | 0.139562 | TRUE  | 1.622219 | FALSE |                        |
| CGTAATG( db/db1 | db/db | 1417 | 0.016799 | FALSE | 1.414927 | FALSE | Endothelia Capillary E |
| CGTAATGT db/db1 | db/db | 4183 | 0.070386 | FALSE | 0.831177 | FALSE | Neuron                 |
| CGTAGTA/ db/db1 | db/db | 2967 | 0.025868 | FALSE | 0.829768 | FALSE | Endothelia Venous EC   |
| CGTAGTA/ db/db1 | db/db | 708  | 0.029787 | FALSE | 2.188166 | FALSE | Photoreceptor          |

|                 |       |      |          |       |          |       |                         |
|-----------------|-------|------|----------|-------|----------|-------|-------------------------|
| CGTAGTAC db/db1 | db/db | 848  | 0.068864 | FALSE | 1.877739 | FALSE | Microglia               |
| CGTAGTAC db/db1 | db/db | 1048 | 0.052669 | FALSE | 1.528305 | FALSE | Endothelia Capillary EC |
| CGTAGTAT db/db1 | db/db | 623  | 0.027273 | FALSE | 1.324157 | FALSE | Photoreceptor           |
| CGTAGTAT db/db1 | db/db | 5215 | 0.029787 | FALSE | 0.925106 | FALSE | Photoreceptor           |
| CGTCAAA db/db1  | db/db | 6717 | 0.095727 | FALSE | 0.79568  | FALSE | Photoreceptor           |
| CGTCAAA db/db1  | db/db | 1790 | 0.107669 | TRUE  | 3.041018 | FALSE |                         |
| CGTCAAA db/db1  | db/db | 430  | 0.05065  | FALSE | 4.221691 | FALSE | Muller cell             |
| CGTCAAA db/db1  | db/db | 463  | 0.031973 | FALSE | 0.404373 | FALSE | Photoreceptor           |
| CGTCAAA db/db1  | db/db | 2959 | 0.01981  | FALSE | 0.837149 | FALSE | Endothelia EC-C4        |
| CGTCAAA db/db1  | db/db | 1360 | 0.030859 | FALSE | 2.076924 | FALSE | Pericyte                |
| CGTCAAA db/db1  | db/db | 2012 | 0.030859 | FALSE | 0.845808 | FALSE | Photoreceptor           |
| CGTCAAA db/db1  | db/db | 6351 | 0.103567 | TRUE  | 0.788443 | FALSE |                         |
| CGTCAAA db/db1  | db/db | 670  | 0.032546 | FALSE | 2.201271 | FALSE | Pericyte                |
| CGTCAAA db/db1  | db/db | 686  | 0.009063 | FALSE | 2.131009 | FALSE | Pericyte                |
| CGTCCATA db/db1 | db/db | 2703 | 0.03313  | FALSE | 1.355598 | FALSE | Endothelia Venous EC    |
| CGTCCATA db/db1 | db/db | 4605 | 0.024105 | FALSE | 0.860656 | FALSE | Photoreceptor           |
| CGTCCATA db/db1 | db/db | 789  | 0.043505 | FALSE | 2.696384 | FALSE | Neuron                  |
| CGTCCATC db/db1 | db/db | 3080 | 0.113205 | TRUE  | 1.338451 | FALSE |                         |
| CGTCCATC db/db1 | db/db | 7256 | 0.018422 | FALSE | 0.471878 | FALSE | Photoreceptor           |
| CGTCCATC db/db1 | db/db | 3232 | 0.038953 | FALSE | 1.235457 | FALSE | Endothelia Capillary EC |
| CGTCCATC db/db1 | db/db | 2326 | 0.052669 | FALSE | 1.058106 | FALSE | Photoreceptor           |
| CGTCCATT db/db1 | db/db | 2057 | 0.065957 | FALSE | 0.829596 | FALSE | Photoreceptor           |
| CGTCCATT db/db1 | db/db | 697  | 0.037564 | FALSE | 1.183892 | FALSE | Photoreceptor           |
| CGTCCATT db/db1 | db/db | 4911 | 0.023682 | FALSE | 0.65947  | FALSE | Photoreceptor           |
| CGTGAATC db/db1 | db/db | 2734 | 0.14163  | TRUE  | 2.965953 | FALSE |                         |
| CGTGAATC db/db1 | db/db | 4945 | 0.078788 | FALSE | 0.87638  | FALSE | Neuron                  |
| CGTGAATC db/db1 | db/db | 516  | 0.011081 | FALSE | 1.370351 | FALSE | Muller cell             |
| CGTGAATC db/db1 | db/db | 1282 | 0.015581 | FALSE | 1.149136 | FALSE | Endothelia Capillary EC |
| CGTGAATC db/db1 | db/db | 1797 | 0.031973 | FALSE | 1.219644 | FALSE | Endothelia Capillary EC |
| CGTGAATC db/db1 | db/db | 1242 | 0.053718 | FALSE | 0.842014 | FALSE | Photoreceptor           |
| CGTGAATT db/db1 | db/db | 1332 | 0.068864 | FALSE | 1.824281 | FALSE | Photoreceptor           |
| CGTGAATT db/db1 | db/db | 852  | 0.036232 | FALSE | 0.835919 | FALSE | Photoreceptor           |
| CGTGATA db/db1  | db/db | 812  | 0.048732 | FALSE | 1.274254 | FALSE | Photoreceptor           |
| CGTGATA db/db1  | db/db | 1659 | 0.016799 | FALSE | 1.127895 | FALSE | Endothelia EC-C4        |
| CGTGATA db/db1  | db/db | 873  | 0.032546 | FALSE | 1.033279 | FALSE | Photoreceptor           |
| CGTGATA db/db1  | db/db | 3414 | 0.020171 | FALSE | 0.916388 | FALSE | Endothelia Venous EC    |
| CGTGATA db/db1  | db/db | 497  | 0.103732 | TRUE  | 2.295082 | FALSE |                         |
| CGTGATA db/db1  | db/db | 3892 | 0.024105 | FALSE | 1.08904  | FALSE | Photoreceptor           |
| CGTGATA db/db1  | db/db | 827  | 0.060641 | FALSE | 5.012326 | TRUE  |                         |
| CGTGCTTA db/db1 | db/db | 876  | 0.032546 | FALSE | 1.62142  | FALSE | Photoreceptor           |
| CGTGCTTA db/db1 | db/db | 424  | 0.063221 | FALSE | 4.05124  | FALSE | Muller cell             |
| CGTGCTTC db/db1 | db/db | 444  | 0.036891 | FALSE | 2.075465 | FALSE | Pericyte                |
| CGTGCTTC db/db1 | db/db | 6984 | 0.026328 | FALSE | 0.55172  | FALSE | Photoreceptor           |
| CGTGTCTC db/db1 | db/db | 1310 | 0.016488 | FALSE | 1.777965 | FALSE | Endothelia Capillary EC |
| CGTGTCTC db/db1 | db/db | 2225 | 0.012557 | FALSE | 1.015563 | FALSE | Endothelia Venous EC    |
| CGTGTCTC db/db1 | db/db | 392  | 0.084562 | FALSE | 9.505703 | TRUE  |                         |
| CGTGTCTC db/db1 | db/db | 1976 | 0.012557 | FALSE | 1.152922 | FALSE | Endothelia Venous EC    |

|                  |       |      |          |       |          |       |                        |
|------------------|-------|------|----------|-------|----------|-------|------------------------|
| CGTGTCTT db/db1  | db/db | 5195 | 0.015287 | FALSE | 0.466394 | FALSE | Photoreceptor          |
| CGTTAGA db/db1   | db/db | 2823 | 0.035586 | FALSE | 0.997262 | FALSE | Endothelia EC-C4       |
| CGTTAGAC db/db1  | db/db | 1149 | 0.015581 | FALSE | 1.001333 | FALSE | Endothelia Aterial EC  |
| CGTTAGAC db/db1  | db/db | 2077 | 0.040404 | FALSE | 1.075395 | FALSE | Photoreceptor          |
| CGTTAGAC db/db1  | db/db | 3808 | 0.218615 | TRUE  | 2.697207 | FALSE |                        |
| CGTTAGAC db/db1  | db/db | 1139 | 0.024534 | FALSE | 0.820564 | FALSE | Endothelia Capillary E |
| CGTTAGAT db/db1  | db/db | 724  | 0.078788 | FALSE | 2.329036 | FALSE | Neuron                 |
| CGTTAGAT db/db1  | db/db | 2141 | 0.025868 | FALSE | 1.319139 | FALSE | Endothelia Capillary E |
| CGTTAGAT db/db1  | db/db | 895  | 0.052669 | FALSE | 1.936692 | FALSE | Photoreceptor          |
| CGTTCTGC db/db1  | db/db | 2190 | 0.075259 | FALSE | 0.523054 | FALSE | Photoreceptor          |
| CGTTCTGC db/db1  | db/db | 621  | 0.024534 | FALSE | 1.866925 | FALSE | Endothelia Capillary E |
| CGTTCTGT db/db1  | db/db | 4411 | 0.24     | TRUE  | 2.136714 | FALSE |                        |
| CGTTGGG db/db1   | db/db | 1501 | 0.020908 | FALSE | 0.880337 | FALSE | Photoreceptor          |
| CGTTGGG db/db1   | db/db | 1666 | 0.014151 | FALSE | 1.012158 | FALSE | Endothelia Capillary E |
| CGTTGGG db/db1   | db/db | 3631 | 0.051646 | FALSE | 1.030723 | FALSE | Photoreceptor          |
| CGTTGGG db/db1   | db/db | 2235 | 0.05065  | FALSE | 1.537423 | FALSE | Photoreceptor          |
| CGTTGGG db/db1   | db/db | 4260 | 0.053718 | FALSE | 0.67083  | FALSE | Neuron                 |
| CGTTGGG db/db1   | db/db | 688  | 0.031973 | FALSE | 2.287927 | FALSE | Endothelia Capillary E |
| CGTTGGG db/db1   | db/db | 780  | 0.08663  | FALSE | 1.95084  | FALSE | Photoreceptor          |
| CGTTGGG db/db1   | db/db | 3691 | 0.018761 | FALSE | 0.622943 | FALSE | Photoreceptor          |
| CGTTGGG db/db1   | db/db | 3332 | 0.034334 | FALSE | 1.144573 | FALSE | Photoreceptor          |
| CTAACCCA db/db1  | db/db | 3022 | 0.009277 | FALSE | 1.465037 | FALSE | Photoreceptor          |
| CTAACCCA db/db1  | db/db | 1645 | 0.030859 | FALSE | 1.510835 | FALSE | Pericyte               |
| CTAACCCA db/db1  | db/db | 6763 | 0.046906 | FALSE | 0.489421 | FALSE | Photoreceptor          |
| CTAACCCC db/db1  | db/db | 4831 | 0.030318 | FALSE | 0.789127 | FALSE | Photoreceptor          |
| CTAACCCCT db/db1 | db/db | 922  | 0.035586 | FALSE | 1.085042 | FALSE | Photoreceptor          |
| CTAACCCCT db/db1 | db/db | 726  | 0.055901 | FALSE | 2.470497 | FALSE | Endothelia Capillary E |
| CTAACCCCT db/db1 | db/db | 1252 | 0.008852 | FALSE | 1.470154 | FALSE | Endothelia Capillary E |
| CTAACCCCT db/db1 | db/db | 1852 | 0.020171 | FALSE | 0.778547 | FALSE | Endothelia Capillary E |
| CTAACTTA db/db1  | db/db | 2096 | 0.148319 | TRUE  | 3.988932 | FALSE |                        |
| CTAACTTA db/db1  | db/db | 4419 | 0.109375 | TRUE  | 1.520677 | FALSE |                        |
| CTAACTTA db/db1  | db/db | 6404 | 0.054795 | FALSE | 0.778553 | FALSE | Photoreceptor          |
| CTAACTTA db/db1  | db/db | 5582 | 0.025868 | FALSE | 0.55142  | FALSE | Photoreceptor          |
| CTAACTTA db/db1  | db/db | 3730 | 0.020908 | FALSE | 0.76724  | FALSE | Endothelia Venous EC   |
| CTAACTTC db/db1  | db/db | 1996 | 0.046906 | FALSE | 1.429661 | FALSE | Photoreceptor          |
| CTAACTTG db/db1  | db/db | 6959 | 0.068864 | FALSE | 0.609481 | FALSE | Endothelia EC-C4       |
| CTAACTTG db/db1  | db/db | 1907 | 0.045165 | FALSE | 0.79531  | FALSE | Neuron                 |
| CTAACTTT db/db1  | db/db | 1434 | 0.017114 | FALSE | 1.298402 | FALSE | Endothelia Capillary E |
| CTAAGTG db/db1   | db/db | 1797 | 0.024105 | FALSE | 1.321083 | FALSE | Endothelia Capillary E |
| CTAAGTG db/db1   | db/db | 3234 | 0.04192  | FALSE | 1.176679 | FALSE | Neuron                 |
| CTAAGTG db/db1   | db/db | 610  | 0.024971 | FALSE | 2.041213 | FALSE | Neuron                 |
| CTAAGTG db/db1   | db/db | 576  | 0.049679 | FALSE | 1.198811 | FALSE | Photoreceptor          |
| CTAAGTG db/db1   | db/db | 1971 | 0.046906 | FALSE | 1.08183  | FALSE | Photoreceptor          |
| CTAAGTG db/db1   | db/db | 1715 | 0.073582 | FALSE | 1.423556 | FALSE | Pericyte               |
| CTAAGTG db/db1   | db/db | 578  | 0.038251 | FALSE | 0.825003 | FALSE | Photoreceptor          |
| CTAAGTG db/db1   | db/db | 2913 | 0.05065  | FALSE | 1.261959 | FALSE | Photoreceptor          |
| CTACAGA db/db1   | db/db | 4092 | 0.026796 | FALSE | 0.735269 | FALSE | Endothelia Venous EC   |

|                 |       |      |          |       |          |       |                        |
|-----------------|-------|------|----------|-------|----------|-------|------------------------|
| CTACAGAC db/db1 | db/db | 640  | 0.031411 | FALSE | 0.744248 | FALSE | Photoreceptor          |
| CTACAGAC db/db1 | db/db | 1524 | 0.015287 | FALSE | 1.439163 | FALSE | Endothelia Capillary E |
| CTACAGAC db/db1 | db/db | 769  | 0.009493 | FALSE | 2.191912 | FALSE | Endothelia EC-C4       |
| CTACAGAC db/db1 | db/db | 4061 | 0.153234 | TRUE  | 2.157239 | FALSE |                        |
| CTACAGAC db/db1 | db/db | 682  | 0.009712 | FALSE | 2.330083 | FALSE | Pericyte               |
| CTACAGAT db/db1 | db/db | 2038 | 0.043505 | FALSE | 0.873203 | FALSE | Microglia              |
| CTACAGAT db/db1 | db/db | 1084 | 0.059406 | FALSE | 1.99276  | FALSE | Muller cell            |
| CTACATTA db/db1 | db/db | 1384 | 0.026328 | FALSE | 1.00544  | FALSE | Photoreceptor          |
| CTACATTA db/db1 | db/db | 1622 | 0.036232 | FALSE | 1.08418  | FALSE | Photoreceptor          |
| CTACATTA db/db1 | db/db | 1646 | 0.024534 | FALSE | 0.726408 | FALSE | Photoreceptor          |
| CTACATTC db/db1 | db/db | 2744 | 0.008234 | FALSE | 1.212915 | FALSE | Photoreceptor          |
| CTACATTC db/db1 | db/db | 5661 | 0.018088 | FALSE | 0.541394 | FALSE | Photoreceptor          |
| CTACATTG db/db1 | db/db | 4095 | 0.025416 | FALSE | 0.739604 | FALSE | Photoreceptor          |
| CTACATTG db/db1 | db/db | 1604 | 0.073582 | FALSE | 1.382734 | FALSE | Photoreceptor          |
| CTACATTT db/db1 | db/db | 450  | 0.104679 | TRUE  | 4.195804 | FALSE |                        |
| CTACCCAA db/db1 | db/db | 1487 | 0.009063 | FALSE | 1.398638 | FALSE | Pericyte               |
| CTACCCAA db/db1 | db/db | 5262 | 0.028754 | FALSE | 0.562098 | FALSE | Photoreceptor          |
| CTACCCAA db/db1 | db/db | 2532 | 0.020908 | FALSE | 0.933235 | FALSE | Endothelia Venous EC   |
| CTACCCAC db/db1 | db/db | 4288 | 0.012557 | FALSE | 0.327165 | FALSE | Photoreceptor          |
| CTACCCAC db/db1 | db/db | 1918 | 0.061912 | FALSE | 1.299826 | FALSE | Photoreceptor          |
| CTACCCAG db/db1 | db/db | 4163 | 0.017114 | FALSE | 0.640247 | FALSE | Endothelia EC-C4       |
| CTACCCAG db/db1 | db/db | 2625 | 0.057037 | FALSE | 0.928335 | FALSE | Endothelia Venous EC   |
| CTACCCAT db/db1 | db/db | 7438 | 0.021669 | FALSE | 0.69927  | FALSE | Photoreceptor          |
| CTACCCAT db/db1 | db/db | 3586 | 0.039671 | FALSE | 0.78102  | FALSE | Endothelia Venous EC   |
| CTACCCAT db/db1 | db/db | 475  | 0.063221 | FALSE | 1.696531 | FALSE | Photoreceptor          |
| CTACCCAT db/db1 | db/db | 735  | 0.063221 | FALSE | 8.073395 | TRUE  |                        |
| CTACCTGC db/db1 | db/db | 1249 | 0.012052 | FALSE | 1.178005 | FALSE | Endothelia Capillary E |
| CTACCTGC db/db1 | db/db | 412  | 0.04192  | FALSE | 1.054546 | FALSE | Photoreceptor          |
| CTACCTGC db/db1 | db/db | 1584 | 0.098234 | FALSE | 1.801718 | FALSE | Muller cell            |
| CTACCTGC db/db1 | db/db | 1619 | 0.042704 | FALSE | 0.672958 | FALSE | Photoreceptor          |
| CTACCTGC db/db1 | db/db | 1241 | 0.058205 | FALSE | 1.518702 | FALSE | Photoreceptor          |
| CTACCTGC db/db1 | db/db | 533  | 0.067388 | FALSE | 12.76803 | TRUE  |                        |
| CTACCTGC db/db1 | db/db | 3255 | 0.032546 | FALSE | 0.772047 | FALSE | Photoreceptor          |
| CTACCTGC db/db1 | db/db | 4552 | 0.021286 | FALSE | 1.018513 | FALSE | Endothelia Capillary E |
| CTACCTGT db/db1 | db/db | 1282 | 0.126437 | TRUE  | 3.622124 | FALSE |                        |
| CTACGGG db/db1  | db/db | 459  | 0.13452  | TRUE  | 5.602716 | TRUE  |                        |
| CTACGGG db/db1  | db/db | 2041 | 0.039671 | FALSE | 0.907092 | FALSE | Neuron                 |
| CTACGGG db/db1  | db/db | 3721 | 0.034954 | FALSE | 0.829743 | FALSE | Endothelia Venous EC   |
| CTACGGG db/db1  | db/db | 268  | 0.071958 | FALSE | 2.849389 | FALSE | Microglia              |
| CTACGGG db/db1  | db/db | 807  | 0.027273 | FALSE | 1.121906 | FALSE | Photoreceptor          |
| CTACGGG db/db1  | db/db | 2245 | 0.018088 | FALSE | 0.867986 | FALSE | Endothelia EC-C4       |
| CTACGGG db/db1  | db/db | 1461 | 0.071958 | FALSE | 1.079002 | FALSE | Photoreceptor          |
| CTACGGG db/db1  | db/db | 659  | 0.035586 | FALSE | 0.786407 | FALSE | Photoreceptor          |
| CTACTATA db/db1 | db/db | 890  | 0.038251 | FALSE | 2.285214 | FALSE | Muller cell            |
| CTACTATC db/db1 | db/db | 5049 | 0.026796 | FALSE | 0.490951 | FALSE | Endothelia EC-C4       |
| CTACTATC db/db1 | db/db | 1246 | 0.022455 | FALSE | 2.334576 | FALSE | Neuron                 |
| CTACTATC db/db1 | db/db | 1733 | 0.043505 | FALSE | 1.72477  | FALSE | Endothelia Capillary E |



|                 |       |      |          |       |          |       |                        |
|-----------------|-------|------|----------|-------|----------|-------|------------------------|
| CTACTATG db/db1 | db/db | 793  | 0.030318 | FALSE | 2.144215 | FALSE | Photoreceptor          |
| CTACTATG db/db1 | db/db | 1892 | 0.027758 | FALSE | 1.262398 | FALSE | Endothelia Capillary E |
| CTACTATG db/db1 | db/db | 4310 | 0.026796 | FALSE | 0.94389  | FALSE | Endothelia EC-C4       |
| CTACTATG db/db1 | db/db | 845  | 0.023682 | FALSE | 1.283693 | FALSE | Endothelia Capillary E |
| CTAGACA db/db1  | db/db | 1066 | 0.016799 | FALSE | 0.653009 | FALSE | Photoreceptor          |
| CTAGACA db/db1  | db/db | 3149 | 0.013338 | FALSE | 1.04256  | FALSE | Endothelia Venous EC   |
| CTAGACA db/db1  | db/db | 7927 | 0.018088 | FALSE | 0.324538 | FALSE | Photoreceptor          |
| CTAGACA db/db1  | db/db | 867  | 0.03313  | FALSE | 2.830561 | FALSE | Muller cell            |
| CTAGACA db/db1  | db/db | 1462 | 0.033726 | FALSE | 1.058808 | FALSE | Photoreceptor          |
| CTAGACA db/db1  | db/db | 791  | 0.012814 | FALSE | 1.211875 | FALSE | Endothelia EC-C4       |
| CTAGACA db/db1  | db/db | 7070 | 0.022059 | FALSE | 0.507728 | FALSE | Photoreceptor          |
| CTAGACA db/db1  | db/db | 683  | 0.022857 | FALSE | 3.420669 | FALSE | Muller cell            |
| CTAGACA db/db1  | db/db | 597  | 0.08663  | FALSE | 2.79787  | FALSE | Endothelia Capillary E |
| CTAGACA db/db1  | db/db | 751  | 0.032546 | FALSE | 0.169428 | FALSE | Photoreceptor          |
| CTAGGTA db/db1  | db/db | 1370 | 0.031973 | FALSE | 1.070818 | FALSE | Photoreceptor          |
| CTAGGTA db/db1  | db/db | 721  | 0.047807 | FALSE | 2.9019   | FALSE | Neuron                 |
| CTAGGTA db/db1  | db/db | 711  | 0.047807 | FALSE | 1.84053  | FALSE | Photoreceptor          |
| CTAGGTA db/db1  | db/db | 558  | 0.053718 | FALSE | 2.632125 | FALSE | Photoreceptor          |
| CTAGGTA db/db1  | db/db | 2491 | 0.024534 | FALSE | 1.014605 | FALSE | Endothelia Capillary E |
| CTAGGTA db/db1  | db/db | 1955 | 0.064568 | FALSE | 0.924311 | FALSE | Neuron                 |
| CTAGGTA db/db1  | db/db | 7104 | 0.023682 | FALSE | 0.720869 | FALSE | Photoreceptor          |
| CTATAGGA db/db1 | db/db | 3196 | 0.008852 | FALSE | 1.020787 | FALSE | Endothelia Capillary E |
| CTATAGGA db/db1 | db/db | 440  | 0.032546 | FALSE | 1.649351 | FALSE | Photoreceptor          |
| CTATAGGA db/db1 | db/db | 6331 | 0.031973 | FALSE | 0.805663 | FALSE | Photoreceptor          |
| CTATAGGA db/db1 | db/db | 466  | 0.068864 | FALSE | 2.399784 | FALSE | Neuron                 |
| CTATAGGA db/db1 | db/db | 7635 | 0.020908 | FALSE | 0.408728 | FALSE | Photoreceptor          |
| CTATCCGA db/db1 | db/db | 7116 | 0.357022 | TRUE  | 1.66744  | FALSE |                        |
| CTATCCGC db/db1 | db/db | 4231 | 0.047807 | FALSE | 0.937322 | FALSE | Photoreceptor          |
| CTATCCGC db/db1 | db/db | 5541 | 0.037564 | FALSE | 0.832546 | FALSE | Photoreceptor          |
| CTATCCGC db/db1 | db/db | 2572 | 0.042704 | FALSE | 1.197954 | FALSE | Endothelia Capillary E |
| CTATCCGC db/db1 | db/db | 8547 | 0.013338 | FALSE | 0.191483 | FALSE | Photoreceptor          |
| CTATCCGC db/db1 | db/db | 2899 | 0.018422 | FALSE | 1.103965 | FALSE | Endothelia Venous EC   |
| CTATCCGC db/db1 | db/db | 1551 | 0.014997 | FALSE | 0.807184 | FALSE | Endothelia Capillary E |
| CTATCCGT db/db1 | db/db | 534  | 0.027273 | FALSE | 28.62863 | TRUE  |                        |
| CTATCCGT db/db1 | db/db | 535  | 0.009493 | FALSE | 3.220976 | FALSE | Muller cell            |
| CTATCCGT db/db1 | db/db | 9414 | 0.013605 | FALSE | 0.406899 | FALSE | Photoreceptor          |
| CTATCCGT db/db1 | db/db | 858  | 0.027273 | FALSE | 2.358138 | FALSE | Photoreceptor          |
| CTATCCGT db/db1 | db/db | 755  | 0.005095 | FALSE | 1.507604 | FALSE | Pericyte               |
| CTATCCGT db/db1 | db/db | 5991 | 0.010614 | FALSE | 0.422919 | FALSE | Photoreceptor          |
| CTATCTAA db/db1 | db/db | 566  | 0.146004 | TRUE  | 4.961832 | FALSE |                        |
| CTATCTAA db/db1 | db/db | 6932 | 0.027758 | FALSE | 0.600484 | FALSE | Photoreceptor          |
| CTATCTAA db/db1 | db/db | 4680 | 0.020171 | FALSE | 0.649968 | FALSE | Photoreceptor          |
| CTATCTAA db/db1 | db/db | 3440 | 0.021286 | FALSE | 0.992207 | FALSE | Endothelia Venous EC   |
| CTATCTAC db/db1 | db/db | 2070 | 0.014711 | FALSE | 1.261457 | FALSE | Endothelia Capillary E |
| CTATCTAC db/db1 | db/db | 1010 | 0.100845 | TRUE  | 6.551298 | TRUE  |                        |
| CTATCTAC db/db1 | db/db | 6581 | 0.53202  | TRUE  | 1.036683 | FALSE |                        |
| CTATCTAG db/db1 | db/db | 7822 | 0.058205 | FALSE | 0.501386 | FALSE | Photoreceptor          |

|                 |       |      |          |       |          |       |                        |
|-----------------|-------|------|----------|-------|----------|-------|------------------------|
| CTATCTAG db/db1 | db/db | 650  | 0.133788 | TRUE  | 4.720088 | FALSE |                        |
| CTCAACCA db/db1 | db/db | 717  | 0.070386 | FALSE | 7.919847 | TRUE  |                        |
| CTCAACCG db/db1 | db/db | 1783 | 0.019106 | FALSE | 0.966429 | FALSE | Endothelia Capillary E |
| CTCAACCG db/db1 | db/db | 2521 | 0.088776 | FALSE | 1.053526 | FALSE | Endothelia EC-C4       |
| CTCAACCG db/db1 | db/db | 1746 | 0.021669 | FALSE | 0.945805 | FALSE | Endothelia Capillary E |
| CTCAACCG db/db1 | db/db | 512  | 0.067388 | FALSE | 13.90821 | TRUE  |                        |
| CTCAACCG db/db1 | db/db | 2606 | 0.040404 | FALSE | 1.126224 | FALSE | Photoreceptor          |
| CTCAACCT db/db1 | db/db | 1565 | 0.025416 | FALSE | 1.657821 | FALSE | Endothelia EC-C4       |
| CTCAAGA db/db1  | db/db | 731  | 0.228861 | TRUE  | 1.47929  | FALSE |                        |
| CTCAAGAC db/db1 | db/db | 1251 | 0.228861 | TRUE  | 6.233766 | TRUE  |                        |
| CTCAAGAC db/db1 | db/db | 505  | 0.028754 | FALSE | 1.142309 | FALSE | Photoreceptor          |
| CTCAAGAC db/db1 | db/db | 3185 | 0.035586 | FALSE | 1.212801 | FALSE | Endothelia Venous EC   |
| CTCAAGAT db/db1 | db/db | 409  | 0.088776 | FALSE | 18.99351 | TRUE  |                        |
| CTCAAGAT db/db1 | db/db | 988  | 0.113205 | TRUE  | 3.576341 | FALSE |                        |
| CTCAAGAT db/db1 | db/db | 1559 | 0.017758 | FALSE | 1.180358 | FALSE | Endothelia Capillary E |
| CTCAATTA db/db1 | db/db | 630  | 0.036232 | FALSE | 1.184239 | FALSE | Photoreceptor          |
| CTCAATTA db/db1 | db/db | 885  | 0.070386 | FALSE | 1.744598 | FALSE | Photoreceptor          |
| CTCAATTC db/db1 | db/db | 970  | 0.020908 | FALSE | 0.530917 | FALSE | Photoreceptor          |
| CTCAATTG db/db1 | db/db | 582  | 0.106408 | TRUE  | 6.771463 | TRUE  |                        |
| CTCAATTG db/db1 | db/db | 970  | 0.045165 | FALSE | 0.903342 | FALSE | Photoreceptor          |
| CTCAATTG db/db1 | db/db | 1087 | 0.073582 | FALSE | 0.852452 | FALSE | Photoreceptor          |
| CTCAATTG db/db1 | db/db | 730  | 0.020536 | FALSE | 0.857218 | FALSE | Photoreceptor          |
| CTCAATTG db/db1 | db/db | 757  | 0.067388 | FALSE | 1.871405 | FALSE | Photoreceptor          |
| CTCAATTG db/db1 | db/db | 1770 | 0.016488 | FALSE | 1.016283 | FALSE | Endothelia EC-C4       |
| CTCAATTT db/db1 | db/db | 419  | 0.041154 | FALSE | 3.704608 | FALSE | Photoreceptor          |
| CTCAATTT db/db1 | db/db | 819  | 0.028251 | FALSE | 2.742004 | FALSE | Muller cell            |
| CTCACTGA db/db1 | db/db | 1504 | 0.011081 | FALSE | 1.034778 | FALSE | Endothelia EC-C4       |
| CTCACTGA db/db1 | db/db | 3214 | 0.023266 | FALSE | 0.676525 | FALSE | Photoreceptor          |
| CTCACTGC db/db1 | db/db | 2597 | 0.030859 | FALSE | 0.900177 | FALSE | Photoreceptor          |
| CTCACTGC db/db1 | db/db | 7315 | 0.030859 | FALSE | 0.416598 | FALSE | Photoreceptor          |
| CTCACTGC db/db1 | db/db | 536  | 0.110901 | TRUE  | 2.513967 | FALSE |                        |
| CTCACTGC db/db1 | db/db | 1830 | 0.007441 | FALSE | 0.960075 | FALSE | Endothelia Capillary E |
| CTCACTGC db/db1 | db/db | 3619 | 0.042704 | FALSE | 1.018662 | FALSE | Endothelia Venous EC   |
| CTCACTGT db/db1 | db/db | 2265 | 0.078788 | FALSE | 0.92214  | FALSE | Endothelia Venous EC   |
| CTCACTGT db/db1 | db/db | 1782 | 0.061912 | FALSE | 1.010608 | FALSE | Photoreceptor          |
| CTCACTGT db/db1 | db/db | 4652 | 0.049679 | FALSE | 0.810716 | FALSE | Photoreceptor          |
| CTCAGAA db/db1  | db/db | 5929 | 0.034334 | FALSE | 0.752446 | FALSE | Photoreceptor          |
| CTCAGAA db/db1  | db/db | 2100 | 0.071958 | FALSE | 1.080502 | FALSE | Photoreceptor          |
| CTCAGAAC db/db1 | db/db | 2327 | 0.009712 | FALSE | 1.673845 | FALSE | Photoreceptor          |
| CTCAGAAC db/db1 | db/db | 3135 | 0.070386 | FALSE | 8.3988   | TRUE  |                        |
| CTCAGAAC db/db1 | db/db | 7173 | 0.026328 | FALSE | 0.680088 | FALSE | Photoreceptor          |
| CTCAGAAC db/db1 | db/db | 5434 | 0.148377 | TRUE  | 0.774307 | FALSE |                        |
| CTCAGAAC db/db1 | db/db | 973  | 0.068864 | FALSE | 1.918432 | FALSE | Muller cell            |
| CTCAGAAC db/db1 | db/db | 1970 | 0.013338 | FALSE | 1.332775 | FALSE | Endothelia Aterial EC  |
| CTCAGAAT db/db1 | db/db | 1520 | 0.080645 | FALSE | 1.072244 | FALSE | Photoreceptor          |
| CTCAGAAT db/db1 | db/db | 828  | 0.034954 | FALSE | 1.132313 | FALSE | Photoreceptor          |
| CTCAGAAT db/db1 | db/db | 2681 | 0.016488 | FALSE | 1.029376 | FALSE | Endothelia Venous EC   |

|                 |       |      |          |       |          |       |                        |
|-----------------|-------|------|----------|-------|----------|-------|------------------------|
| CTCAGAAT db/db1 | db/db | 3292 | 0.070386 | FALSE | 1.020326 | FALSE | Photoreceptor          |
| CTCAGGG db/db1  | db/db | 616  | 0.027273 | FALSE | 0.353867 | FALSE | Photoreceptor          |
| CTCAGGG db/db1  | db/db | 3670 | 0.028251 | FALSE | 0.519739 | FALSE | Photoreceptor          |
| CTCAGGG db/db1  | db/db | 3990 | 0.024971 | FALSE | 0.70522  | FALSE | Endothelia Venous EC   |
| CTCAGGG db/db1  | db/db | 1163 | 0.008438 | FALSE | 0.893372 | FALSE | Endothelia EC-C4       |
| CTCAGGG db/db1  | db/db | 2505 | 0.03313  | FALSE | 1.109192 | FALSE | Endothelia Capillary E |
| CTCAGGG db/db1  | db/db | 3525 | 0.011081 | FALSE | 1.022141 | FALSE | Endothelia Capillary E |
| CTCAGGG db/db1  | db/db | 1349 | 0.209157 | TRUE  | 4.200953 | FALSE |                        |
| CTCAGGG db/db1  | db/db | 746  | 0.080645 | FALSE | 1.566939 | FALSE | Photoreceptor          |
| CTCAGGG db/db1  | db/db | 465  | 0.020536 | FALSE | 1.888545 | FALSE | Photoreceptor          |
| CTCAGGG db/db1  | db/db | 1999 | 0.028754 | FALSE | 0.486455 | FALSE | Photoreceptor          |
| CTCAGTCA db/db1 | db/db | 537  | 0.057037 | FALSE | 1.916218 | FALSE | Photoreceptor          |
| CTCAGTCA db/db1 | db/db | 5620 | 0.252153 | TRUE  | 2.050617 | FALSE |                        |
| CTCAGTCC db/db1 | db/db | 498  | 0.112477 | TRUE  | 6.980273 | TRUE  |                        |
| CTCAGTCC db/db1 | db/db | 6596 | 0.013876 | FALSE | 0.379594 | FALSE | Photoreceptor          |
| CTCAGTCC db/db1 | db/db | 479  | 0.119124 | TRUE  | 15.21418 | TRUE  |                        |
| CTCAGTCC db/db1 | db/db | 4424 | 0.411992 | TRUE  | 2.700096 | FALSE |                        |
| CTCAGTCT db/db1 | db/db | 2104 | 0.095727 | FALSE | 1.445232 | FALSE | Photoreceptor          |
| CTCAGTCT db/db1 | db/db | 3109 | 0.024971 | FALSE | 0.897976 | FALSE | Endothelia Venous EC   |
| CTCAGTCT db/db1 | db/db | 1264 | 0.006683 | FALSE | 1.472016 | FALSE | Endothelia Capillary E |
| CTCATCGA db/db1 | db/db | 5651 | 0.015581 | FALSE | 0.494862 | FALSE | Photoreceptor          |
| CTCATCGG db/db1 | db/db | 2543 | 0.047807 | FALSE | 0.998719 | FALSE | Photoreceptor          |
| CTCATCGT db/db1 | db/db | 2001 | 0.411992 | TRUE  | 1.846154 | FALSE |                        |
| CTCATCGT db/db1 | db/db | 1643 | 0.048732 | FALSE | 1.570199 | FALSE | Endothelia EC-C4       |
| CTCATCGT db/db1 | db/db | 418  | 0.048732 | FALSE | 0.912522 | FALSE | Photoreceptor          |
| CTCATCGT db/db1 | db/db | 7068 | 0.014711 | FALSE | 0.739558 | FALSE | Photoreceptor          |
| CTCATGCA db/db1 | db/db | 2035 | 0.020536 | FALSE | 1.031393 | FALSE | Endothelia Capillary E |
| CTCATGCA db/db1 | db/db | 980  | 0.034334 | FALSE | 0.727706 | FALSE | Photoreceptor          |
| CTCATGCA db/db1 | db/db | 6329 | 0.068864 | FALSE | 0.722139 | FALSE | Neuron                 |
| CTCATGCA db/db1 | db/db | 712  | 0.027758 | FALSE | 1.12018  | FALSE | Photoreceptor          |
| CTCATGCC db/db1 | db/db | 4951 | 0.014429 | FALSE | 0.746343 | FALSE | Photoreceptor          |
| CTCATGCT db/db1 | db/db | 514  | 0.01981  | FALSE | 1.8283   | FALSE | Endothelia Capillary E |
| CTCATGCT db/db1 | db/db | 560  | 0.007249 | FALSE | 1.296561 | FALSE | Endothelia Capillary E |
| CTCATTA db/db1  | db/db | 585  | 0.029787 | FALSE | 1.526547 | FALSE | Muller cell            |
| CTCATTA db/db1  | db/db | 1667 | 0.003803 | FALSE | 0.780424 | FALSE | Neuron                 |
| CTCATTA db/db1  | db/db | 4006 | 0.065957 | FALSE | 0.810761 | FALSE | Neuron                 |
| CTCATTAG db/db1 | db/db | 1966 | 0.044326 | FALSE | 1.000676 | FALSE | Photoreceptor          |
| CTCATTAG db/db1 | db/db | 629  | 0.057037 | FALSE | 1.309624 | FALSE | Photoreceptor          |
| CTCATTAG db/db1 | db/db | 4964 | 0.146004 | TRUE  | 2.321924 | FALSE |                        |
| CTCATTAG db/db1 | db/db | 6371 | 0.025868 | FALSE | 0.60832  | FALSE | Photoreceptor          |
| CTCATTAG db/db1 | db/db | 2903 | 0.022455 | FALSE | 1.023494 | FALSE | Endothelia EC-C4       |
| CTCATTAT db/db1 | db/db | 872  | 0.048732 | FALSE | 1.812918 | FALSE | Photoreceptor          |
| CTCCAACA db/db1 | db/db | 1437 | 0.012052 | FALSE | 0.404237 | FALSE | Photoreceptor          |
| CTCCAACC db/db1 | db/db | 4327 | 0.044326 | FALSE | 1.05319  | FALSE | Endothelia EC-C4       |
| CTCCAACC db/db1 | db/db | 1078 | 0.010614 | FALSE | 1.421455 | FALSE | Endothelia Capillary E |
| CTCCAACC db/db1 | db/db | 468  | 0.24     | TRUE  | 5.31401  | TRUE  |                        |
| CTCCAACC db/db1 | db/db | 1368 | 0.035586 | FALSE | 0.934584 | FALSE | Photoreceptor          |

|                 |       |      |          |       |          |       |                        |
|-----------------|-------|------|----------|-------|----------|-------|------------------------|
| CTCCAACC db/db1 | db/db | 6498 | 0.049679 | FALSE | 0.781832 | FALSE | Photoreceptor          |
| CTCCAACC db/db1 | db/db | 937  | 0.08663  | FALSE | 2.866585 | FALSE | Muller cell            |
| CTCCAACC db/db1 | db/db | 895  | 0.029787 | FALSE | 0.755797 | FALSE | Photoreceptor          |
| CTCCAACT db/db1 | db/db | 4738 | 0.017434 | FALSE | 0.782282 | FALSE | Photoreceptor          |
| CTCCAACT db/db1 | db/db | 3271 | 0.025416 | FALSE | 1.036463 | FALSE | Endothelia Capillary E |
| CTCCAACT db/db1 | db/db | 2332 | 0.064568 | FALSE | 1.203251 | FALSE | Photoreceptor          |
| CTCCACAA db/db1 | db/db | 846  | 0.08663  | FALSE | 1.177784 | FALSE | Photoreceptor          |
| CTCCACAA db/db1 | db/db | 654  | 0.070386 | FALSE | 2.556989 | FALSE | Muller cell            |
| CTCCACAA db/db1 | db/db | 1104 | 0.012557 | FALSE | 1.348063 | FALSE | Endothelia Capillary E |
| CTCCACAC db/db1 | db/db | 834  | 0.039671 | FALSE | 3.097286 | FALSE | Muller cell            |
| CTCCACAC db/db1 | db/db | 587  | 0.044326 | FALSE | 2.391818 | FALSE | Muller cell            |
| CTCCACAC db/db1 | db/db | 1818 | 0.012052 | FALSE | 1.084959 | FALSE | Endothelia Capillary E |
| CTCCACAC db/db1 | db/db | 1865 | 0.025416 | FALSE | 0.498442 | FALSE | Photoreceptor          |
| CTCCACAG db/db1 | db/db | 881  | 0.022857 | FALSE | 2.166212 | FALSE | Endothelia Capillary E |
| CTCCACAT db/db1 | db/db | 407  | 0.017758 | FALSE | 0.837771 | FALSE | Photoreceptor          |
| CTCCACAT db/db1 | db/db | 408  | 0.130374 | TRUE  | 9.380531 | TRUE  |                        |
| CTCCACAT db/db1 | db/db | 8966 | 0.034334 | FALSE | 0.516127 | FALSE | Photoreceptor          |
| CTCCATGA db/db1 | db/db | 542  | 0.024534 | FALSE | 0.609535 | FALSE | Photoreceptor          |
| CTCCATGA db/db1 | db/db | 508  | 0.17103  | TRUE  | 4.129794 | FALSE |                        |
| CTCCATGC db/db1 | db/db | 1643 | 0.009277 | FALSE | 0.939003 | FALSE | Endothelia Capillary E |
| CTCCATGC db/db1 | db/db | 825  | 0.059406 | FALSE | 1.060439 | FALSE | Photoreceptor          |
| CTCCATGT db/db1 | db/db | 3069 | 0.017114 | FALSE | 0.52191  | FALSE | Photoreceptor          |
| CTCCATGT db/db1 | db/db | 1522 | 0.053718 | FALSE | 1.347073 | FALSE | Photoreceptor          |
| CTCCATGT db/db1 | db/db | 2863 | 0.049679 | FALSE | 1.041349 | FALSE | Photoreceptor          |
| CTCCATGT db/db1 | db/db | 2198 | 0.055901 | FALSE | 0.489168 | FALSE | Photoreceptor          |
| CTCCCAAA db/db1 | db/db | 2164 | 0.022455 | FALSE | 0.870858 | FALSE | Endothelia Capillary E |
| CTCCCAAA db/db1 | db/db | 2266 | 0.060641 | FALSE | 0.882014 | FALSE | Endothelia Capillary E |
| CTCCCAAA db/db1 | db/db | 3031 | 0.065957 | FALSE | 0.968928 | FALSE | Endothelia Venous EC   |
| CTCCCAAA db/db1 | db/db | 1738 | 0.031973 | FALSE | 0.478796 | FALSE | Photoreceptor          |
| CTCCCAAA db/db1 | db/db | 2723 | 0.028754 | FALSE | 0.864148 | FALSE | Endothelia Capillary E |
| CTCCCAAA db/db1 | db/db | 763  | 0.047807 | FALSE | 0.970396 | FALSE | Photoreceptor          |
| CTCCCAAA db/db1 | db/db | 2262 | 0.024105 | FALSE | 1.089803 | FALSE | Photoreceptor          |
| CTCCCAAA db/db1 | db/db | 1063 | 0.036232 | FALSE | 0.579329 | FALSE | Neuron                 |
| CTCCCAAC db/db1 | db/db | 5378 | 0.015581 | FALSE | 0.820317 | FALSE | Photoreceptor          |
| CTCCCAAC db/db1 | db/db | 646  | 0.030859 | FALSE | 0.951485 | FALSE | Photoreceptor          |
| CTCCCAAC db/db1 | db/db | 3035 | 0.024534 | FALSE | 0.884453 | FALSE | Endothelia EC-C4       |
| CTCCCAAG db/db1 | db/db | 2302 | 0.017434 | FALSE | 0.986492 | FALSE | Endothelia Capillary E |
| CTCCCAAT db/db1 | db/db | 1886 | 0.070386 | FALSE | 1.231255 | FALSE | Endothelia Venous EC   |
| CTCCCAAT db/db1 | db/db | 4183 | 0.019106 | FALSE | 0.892804 | FALSE | Endothelia Aterial EC  |
| CTCCCAAT db/db1 | db/db | 3968 | 0.08663  | FALSE | 0.771742 | FALSE | Endothelia EC-C4       |
| CTCCCAAT db/db1 | db/db | 675  | 0.061912 | FALSE | 1.877978 | FALSE | Endothelia Capillary E |
| CTCCCTCA db/db1 | db/db | 2944 | 0.01981  | FALSE | 0.493859 | FALSE | Photoreceptor          |
| CTCCCTCA db/db1 | db/db | 1674 | 0.059406 | FALSE | 1.466635 | FALSE | Photoreceptor          |
| CTCCCTCG db/db1 | db/db | 7360 | 0.022455 | FALSE | 0.626178 | FALSE | Photoreceptor          |
| CTCCCTCG db/db1 | db/db | 1967 | 0.005435 | FALSE | 1.328894 | FALSE | Pericyte               |
| CTCCCTCT db/db1 | db/db | 886  | 0.010614 | FALSE | 1.274559 | FALSE | Endothelia Capillary E |
| CTCCCTCT db/db1 | db/db | 3522 | 0.13452  | TRUE  | 4.026115 | FALSE |                        |

|          |        |       |      |          |       |          |       |                        |
|----------|--------|-------|------|----------|-------|----------|-------|------------------------|
| CTCCCTCT | db/db1 | db/db | 1090 | 0.057037 | FALSE | 2.848818 | FALSE | Pericyte               |
| CTCCCTCT | db/db1 | db/db | 1582 | 0.138889 | TRUE  | 4.658041 | FALSE |                        |
| CTCCGATC | db/db1 | db/db | 2030 | 0.007249 | FALSE | 0.940636 | FALSE | Endothelia Capillary E |
| CTCCGATC | db/db1 | db/db | 878  | 0.075259 | FALSE | 1.399416 | FALSE | Photoreceptor          |
| CTCCGATC | db/db1 | db/db | 1235 | 0.022857 | FALSE | 1.268726 | FALSE | Endothelia Capillary E |
| CTCCGATC | db/db1 | db/db | 440  | 0.012052 | FALSE | 1.840335 | FALSE | Photoreceptor          |
| CTCCGATC | db/db1 | db/db | 626  | 0.025868 | FALSE | 0.871586 | FALSE | Photoreceptor          |
| CTCCGATC | db/db1 | db/db | 1338 | 0.018422 | FALSE | 1.045872 | FALSE | Endothelia Capillary E |
| CTCCGATC | db/db1 | db/db | 1789 | 0.130374 | TRUE  | 4.341972 | FALSE |                        |
| CTCCGATC | db/db1 | db/db | 573  | 0.035586 | FALSE | 2.14801  | FALSE | Photoreceptor          |
| CTCCGATC | db/db1 | db/db | 2529 | 0.026328 | FALSE | 0.793088 | FALSE | Photoreceptor          |
| CTCCGATC | db/db1 | db/db | 3056 | 0.071958 | FALSE | 1.282428 | FALSE | Photoreceptor          |
| CTCCGATT | db/db1 | db/db | 1010 | 0.013876 | FALSE | 1.102888 | FALSE | Endothelia Capillary E |
| CTCCGATT | db/db1 | db/db | 2421 | 0.084562 | FALSE | 0.656828 | FALSE | Photoreceptor          |
| CTCCTCCA | db/db1 | db/db | 2760 | 0.030318 | FALSE | 0.900015 | FALSE | Endothelia Aterial EC  |
| CTCCTCCC | db/db1 | db/db | 915  | 0.021286 | FALSE | 0.711206 | FALSE | Photoreceptor          |
| CTCCTCCC | db/db1 | db/db | 1132 | 0.038251 | FALSE | 1.76486  | FALSE | Photoreceptor          |
| CTCCTCCC | db/db1 | db/db | 2239 | 0.055901 | FALSE | 0.940759 | FALSE | Photoreceptor          |
| CTCCTCCC | db/db1 | db/db | 5172 | 0.029266 | FALSE | 0.987007 | FALSE | Photoreceptor          |
| CTCCTCCG | db/db1 | db/db | 1596 | 0.012814 | FALSE | 1.080916 | FALSE | Endothelia Capillary E |
| CTCCTCCG | db/db1 | db/db | 5815 | 0.025868 | FALSE | 0.734564 | FALSE | Photoreceptor          |
| CTCCTCCG | db/db1 | db/db | 853  | 0.048732 | FALSE | 1.864419 | FALSE | Photoreceptor          |
| CTCCTCCT | db/db1 | db/db | 9024 | 0.024534 | FALSE | 0.163402 | FALSE | Photoreceptor          |
| CTCCTCCT | db/db1 | db/db | 3375 | 0.013074 | FALSE | 0.904354 | FALSE | Endothelia Capillary E |
| CTCCTCCT | db/db1 | db/db | 4134 | 0.045165 | FALSE | 0.959703 | FALSE | Endothelia Venous EC   |
| CTCCTTTC | db/db1 | db/db | 509  | 0.045165 | FALSE | 2.393617 | FALSE | Neuron                 |
| CTCCTTTC | db/db1 | db/db | 933  | 0.010157 | FALSE | 1.17888  | FALSE | Endothelia Capillary E |
| CTCCTTTT | db/db1 | db/db | 806  | 0.068864 | FALSE | 1.819624 | FALSE | Photoreceptor          |
| CTCGAGG  | db/db1 | db/db | 7367 | 0.040404 | FALSE | 0.483793 | FALSE | Photoreceptor          |
| CTCGAGG  | db/db1 | db/db | 976  | 0.024105 | FALSE | 1.36634  | FALSE | Neuron                 |
| CTCGAGG  | db/db1 | db/db | 1994 | 0.082569 | FALSE | 1.629178 | FALSE | Photoreceptor          |
| CTCGAGG  | db/db1 | db/db | 565  | 0.031973 | FALSE | 1.843512 | FALSE | Photoreceptor          |
| CTCGAGG  | db/db1 | db/db | 802  | 0.030859 | FALSE | 1.064136 | FALSE | Photoreceptor          |
| CTCGAGG  | db/db1 | db/db | 2268 | 0.063221 | FALSE | 1.313572 | FALSE | Photoreceptor          |
| CTCGAGG  | db/db1 | db/db | 1626 | 0.120957 | TRUE  | 1.556157 | FALSE |                        |
| CTCGAGG  | db/db1 | db/db | 1685 | 0.032546 | FALSE | 0.821043 | FALSE | Photoreceptor          |
| CTCTCAGA | db/db1 | db/db | 489  | 0.042704 | FALSE | 1.930644 | FALSE | Endothelia Venous EC   |
| CTCTCAGA | db/db1 | db/db | 501  | 0.098234 | FALSE | 2.697907 | FALSE | Muller cell            |
| CTCTCAGC | db/db1 | db/db | 4511 | 0.05065  | FALSE | 0.688618 | FALSE | Photoreceptor          |
| CTCTCAGC | db/db1 | db/db | 716  | 0.088776 | FALSE | 7.026476 | TRUE  |                        |
| CTCTCAGC | db/db1 | db/db | 1319 | 0.017114 | FALSE | 1.139911 | FALSE | Endothelia Capillary E |
| CTCTCAGC | db/db1 | db/db | 4916 | 0.036232 | FALSE | 0.632206 | FALSE | Endothelia Capillary E |
| CTCTCAGC | db/db1 | db/db | 5496 | 0.184701 | TRUE  | 2.600013 | FALSE |                        |
| CTCTCAGC | db/db1 | db/db | 394  | 0.065957 | FALSE | 2.19157  | FALSE | Muller cell            |
| CTCTCAGC | db/db1 | db/db | 5458 | 0.01981  | FALSE | 0.717391 | FALSE | Photoreceptor          |
| CTCTCAGT | db/db1 | db/db | 7135 | 0.040404 | FALSE | 0.761703 | FALSE | Photoreceptor          |
| CTCTCGAA | db/db1 | db/db | 653  | 0.035586 | FALSE | 0.398511 | FALSE | Neuron                 |

|                 |       |      |          |       |          |       |                        |
|-----------------|-------|------|----------|-------|----------|-------|------------------------|
| CTCTCGAA db/db1 | db/db | 1659 | 0.073582 | FALSE | 0.924938 | FALSE | Endothelia Capillary E |
| CTCTCGAC db/db1 | db/db | 445  | 0.016799 | FALSE | 2.516745 | FALSE | Muller cell            |
| CTCTCGAG db/db1 | db/db | 612  | 0.012052 | FALSE | 2.719326 | FALSE | Muller cell            |
| CTCTCGAT db/db1 | db/db | 6268 | 0.029266 | FALSE | 0.456937 | FALSE | Photoreceptor          |
| CTCTGGTA db/db1 | db/db | 387  | 0.060641 | FALSE | 3.157448 | FALSE | Photoreceptor          |
| CTCTGGTC db/db1 | db/db | 1876 | 0.022857 | FALSE | 1.04509  | FALSE | Photoreceptor          |
| CTCTGGTĈ db/db1 | db/db | 2970 | 0.021669 | FALSE | 0.859063 | FALSE | Endothelia Capillary E |
| CTCTGGTĈ db/db1 | db/db | 1962 | 0.104679 | TRUE  | 0.914695 | FALSE |                        |
| CTCTGGTĈ db/db1 | db/db | 3813 | 0.046025 | FALSE | 1.138408 | FALSE | Photoreceptor          |
| CTCTGGTĈ db/db1 | db/db | 3848 | 0.018761 | FALSE | 0.903133 | FALSE | Endothelia Venous EC   |
| CTCTGGTT db/db1 | db/db | 432  | 0.058205 | FALSE | 9.84975  | TRUE  |                        |
| CTCTGGTT db/db1 | db/db | 827  | 0.041154 | FALSE | 0.664582 | FALSE | Photoreceptor          |
| CTCTGGTT db/db1 | db/db | 669  | 0.05065  | FALSE | 1.03673  | FALSE | Neuron                 |
| CTCTGGTT db/db1 | db/db | 4726 | 0.016799 | FALSE | 0.816447 | FALSE | Photoreceptor          |
| CTGAATGĈ db/db1 | db/db | 6206 | 0.049679 | FALSE | 0.789902 | FALSE | Photoreceptor          |
| CTGAATGĈ db/db1 | db/db | 2214 | 0.023682 | FALSE | 1.023417 | FALSE | Endothelia Capillary E |
| CTGAATGĈ db/db1 | db/db | 6496 | 0.029266 | FALSE | 0.739778 | FALSE | Photoreceptor          |
| CTGAATGĈ db/db1 | db/db | 5546 | 0.588076 | TRUE  | 2.848799 | FALSE |                        |
| CTGAATGĈ db/db1 | db/db | 2797 | 0.038953 | FALSE | 1.077835 | FALSE | Photoreceptor          |
| CTGAATGT db/db1 | db/db | 3333 | 0.016799 | FALSE | 0.791424 | FALSE | Endothelia EC-C4       |
| CTGAATGT db/db1 | db/db | 594  | 0.045165 | FALSE | 4.646861 | FALSE | Muller cell            |
| CTGAATGT db/db1 | db/db | 1565 | 0.054795 | FALSE | 1.246039 | FALSE | Photoreceptor          |
| CTGAATGT db/db1 | db/db | 8451 | 0.138889 | TRUE  | 0.660325 | FALSE |                        |
| CTGAGCGĈ db/db1 | db/db | 2345 | 0.013338 | FALSE | 1.257853 | FALSE | Endothelia Capillary E |
| CTGAGCGĈ db/db1 | db/db | 1415 | 0.020171 | FALSE | 0.436097 | FALSE | Photoreceptor          |
| CTGAGCGĈ db/db1 | db/db | 2988 | 0.093319 | FALSE | 1.257226 | FALSE | Photoreceptor          |
| CTGAGCGĈ db/db1 | db/db | 516  | 0.013605 | FALSE | 2.348375 | FALSE | Muller cell            |
| CTGAGCGĈ db/db1 | db/db | 2703 | 0.061912 | FALSE | 1.755033 | FALSE | Photoreceptor          |
| CTGAGCGĈ db/db1 | db/db | 5037 | 0.013338 | FALSE | 0.74697  | FALSE | Photoreceptor          |
| CTGAGCGĈ db/db1 | db/db | 6872 | 0.025416 | FALSE | 0.664307 | FALSE | Photoreceptor          |
| CTGAGCGĈ db/db1 | db/db | 2208 | 0.011805 | FALSE | 0.712728 | FALSE | Photoreceptor          |
| CTGAGCGĈ db/db1 | db/db | 403  | 0.018761 | FALSE | 3.358814 | FALSE | Endothelia Capillary E |
| CTGAGCGĈ db/db1 | db/db | 2348 | 0.139562 | TRUE  | 2.746192 | FALSE |                        |
| CTGAGCGĈ db/db1 | db/db | 2008 | 0.036232 | FALSE | 1.185789 | FALSE | Photoreceptor          |
| CTGAGGCĈ db/db1 | db/db | 1329 | 0.126437 | TRUE  | 11.48325 | TRUE  |                        |
| CTGAGGCĈ db/db1 | db/db | 1570 | 0.022455 | FALSE | 1.30697  | FALSE | Endothelia Capillary E |
| CTGAGGCĈ db/db1 | db/db | 3502 | 0.038953 | FALSE | 0.743088 | FALSE | Photoreceptor          |
| CTGAGGCĈ db/db1 | db/db | 447  | 0.051646 | FALSE | 3.691224 | FALSE | Muller cell            |
| CTGAGGCĈ db/db1 | db/db | 6745 | 0.138889 | TRUE  | 1.591746 | FALSE |                        |
| CTGAGGCĈ db/db1 | db/db | 663  | 0.046025 | FALSE | 3.861383 | FALSE | Muller cell            |
| CTGAGGCĈ db/db1 | db/db | 783  | 0.063221 | FALSE | 0.795532 | FALSE | Photoreceptor          |
| CTGAGGCĈ db/db1 | db/db | 1726 | 0.055901 | FALSE | 1.582243 | FALSE | Endothelia Capillary E |
| CTGAGGCĈ db/db1 | db/db | 995  | 0.071958 | FALSE | 1.757244 | FALSE | Photoreceptor          |
| CTGAGGCĈ db/db1 | db/db | 1818 | 0.019455 | FALSE | 1.1847   | FALSE | Endothelia EC-C4       |
| CTGATCCA db/db1 | db/db | 6609 | 0.098234 | FALSE | 0.754888 | FALSE | Neuron                 |
| CTGATCCA db/db1 | db/db | 562  | 0.029266 | FALSE | 1.991356 | FALSE | Endothelia Capillary E |
| CTGATCCC db/db1 | db/db | 1829 | 0.137569 | TRUE  | 4.862141 | FALSE |                        |

|                 |       |      |          |       |          |       |                        |
|-----------------|-------|------|----------|-------|----------|-------|------------------------|
| CTGATCCC db/db1 | db/db | 3928 | 0.027273 | FALSE | 0.821366 | FALSE | Endothelia EC-C4       |
| CTGATCCC db/db1 | db/db | 1899 | 0.031973 | FALSE | 1.332706 | FALSE | Neuron                 |
| CTGATCCC db/db1 | db/db | 1575 | 0.015581 | FALSE | 1.610259 | FALSE | Endothelia Capillary E |
| CTGATCCC db/db1 | db/db | 2232 | 0.088776 | FALSE | 1.326914 | FALSE | Endothelia Capillary E |
| CTGATCCC db/db1 | db/db | 5349 | 0.021286 | FALSE | 0.529701 | FALSE | Photoreceptor          |
| CTGATCCC db/db1 | db/db | 1642 | 0.013074 | FALSE | 0.886936 | FALSE | Pericyte               |
| CTGATCCC db/db1 | db/db | 430  | 0.055901 | FALSE | 1.43677  | FALSE | Pericyte               |
| CTGATCCT db/db1 | db/db | 2024 | 0.024105 | FALSE | 1.454721 | FALSE | Neuron                 |
| CTGATCCT db/db1 | db/db | 1481 | 0.076994 | FALSE | 1.038099 | FALSE | Photoreceptor          |
| CTGATCCT db/db1 | db/db | 3019 | 0.04192  | FALSE | 0.977359 | FALSE | Photoreceptor          |
| CTGCAGG db/db1  | db/db | 571  | 0.047807 | FALSE | 0.945296 | FALSE | Photoreceptor          |
| CTGCAGG db/db1  | db/db | 7834 | 0.021286 | FALSE | 0.490795 | FALSE | Photoreceptor          |
| CTGCAGG db/db1  | db/db | 4988 | 0.014711 | FALSE | 0.861371 | FALSE | Photoreceptor          |
| CTGCAGG db/db1  | db/db | 862  | 0.023266 | FALSE | 0.714252 | FALSE | Photoreceptor          |
| CTGCAGG db/db1  | db/db | 396  | 0.017758 | FALSE | 3.956629 | FALSE | Photoreceptor          |
| CTGCAGG db/db1  | db/db | 7029 | 0.028251 | FALSE | 0.338547 | FALSE | Photoreceptor          |
| CTGCAGG db/db1  | db/db | 2079 | 0.013876 | FALSE | 1.301154 | FALSE | Endothelia Capillary E |
| CTGCAGG db/db1  | db/db | 2582 | 0.007833 | FALSE | 1.166798 | FALSE | Endothelia Capillary E |
| CTGCAGG db/db1  | db/db | 521  | 0.030859 | FALSE | 0.479501 | FALSE | Photoreceptor          |
| CTGCAGG db/db1  | db/db | 3315 | 0.032546 | FALSE | 0.91798  | FALSE | Endothelia Aterial EC  |
| CTGCAGG db/db1  | db/db | 1371 | 0.073582 | FALSE | 1.639014 | FALSE | Photoreceptor          |
| CTGCAGG db/db1  | db/db | 1087 | 0.007833 | FALSE | 1.10791  | FALSE | Endothelia Capillary E |
| CTGCATCA db/db1 | db/db | 2565 | 0.017758 | FALSE | 1.338807 | FALSE | Endothelia Capillary E |
| CTGCATCA db/db1 | db/db | 1140 | 0.53202  | TRUE  | 7.57315  | TRUE  |                        |
| CTGCATCA db/db1 | db/db | 1572 | 0.119568 | TRUE  | 4.341373 | FALSE |                        |
| CTGCATCC db/db1 | db/db | 1152 | 0.024534 | FALSE | 1.143031 | FALSE | Endothelia Capillary E |
| CTGCATCC db/db1 | db/db | 2164 | 0.020171 | FALSE | 0.963065 | FALSE | Endothelia Capillary E |
| CTGCATCC db/db1 | db/db | 8770 | 0.011805 | FALSE | 0.449217 | FALSE | Photoreceptor          |
| CTGCATCC db/db1 | db/db | 1707 | 0.042704 | FALSE | 0.422793 | FALSE | Photoreceptor          |
| CTGCATCC db/db1 | db/db | 2149 | 0.004275 | FALSE | 1.118911 | FALSE | Neuron                 |
| CTGCCATA db/db1 | db/db | 1542 | 0.022455 | FALSE | 1.246182 | FALSE | Endothelia Capillary E |
| CTGCCATA db/db1 | db/db | 639  | 0.008644 | FALSE | 1.421928 | FALSE | Endothelia EC-C4       |
| CTGCCATC db/db1 | db/db | 3548 | 0.028754 | FALSE | 0.955423 | FALSE | Photoreceptor          |
| CTGCCATC db/db1 | db/db | 3809 | 0.060641 | FALSE | 0.883006 | FALSE | Endothelia Venous EC   |
| CTGCCATC db/db1 | db/db | 3786 | 0.100845 | TRUE  | 2.565619 | FALSE |                        |
| CTGCCATT db/db1 | db/db | 2604 | 0.059406 | FALSE | 0.505533 | FALSE | Photoreceptor          |
| CTGCCATT db/db1 | db/db | 1169 | 0.015879 | FALSE | 1.27343  | FALSE | Endothelia Capillary E |
| CTGCCATT db/db1 | db/db | 2752 | 0.036891 | FALSE | 0.955117 | FALSE | Neuron                 |
| CTGCCTAC db/db1 | db/db | 1653 | 0.095727 | FALSE | 1.20526  | FALSE | Endothelia Venous EC   |
| CTGCCTAC db/db1 | db/db | 302  | 0.103567 | TRUE  | 18.16144 | TRUE  |                        |
| CTGCCTAC db/db1 | db/db | 1300 | 0.003803 | FALSE | 1.285978 | FALSE | Pericyte               |
| CTGCCTAC db/db1 | db/db | 1453 | 0.019455 | FALSE | 1.727964 | FALSE | Endothelia Aterial EC  |
| CTGCCTAC db/db1 | db/db | 1060 | 0.020908 | FALSE | 0.809509 | FALSE | Photoreceptor          |
| CTGCCTAG db/db1 | db/db | 881  | 0.024105 | FALSE | 1.577372 | FALSE | Neuron                 |
| CTGCCTAG db/db1 | db/db | 4117 | 0.164835 | TRUE  | 1.881156 | FALSE |                        |
| CTGCCTAG db/db1 | db/db | 839  | 0.048732 | FALSE | 1.974332 | FALSE | Photoreceptor          |
| CTGCCTAG db/db1 | db/db | 3030 | 0.021669 | FALSE | 0.731627 | FALSE | Endothelia Venous EC   |

|                 |       |      |          |       |          |       |                        |
|-----------------|-------|------|----------|-------|----------|-------|------------------------|
| CTGCCTAG db/db1 | db/db | 701  | 0.017114 | FALSE | 2.211144 | FALSE | Photoreceptor          |
| CTGCCTAG db/db1 | db/db | 849  | 0.034334 | FALSE | 2.094792 | FALSE | Endothelia Capillary E |
| CTGCCTAT db/db1 | db/db | 4072 | 0.05065  | FALSE | 1.037683 | FALSE | Photoreceptor          |
| CTGCGAG db/db1  | db/db | 2304 | 0.265464 | TRUE  | 2.666993 | FALSE |                        |
| CTGCGAG db/db1  | db/db | 1750 | 0.027273 | FALSE | 0.955293 | FALSE | Microglia              |
| CTGCGAG db/db1  | db/db | 1180 | 0.013074 | FALSE | 1.001545 | FALSE | Endothelia EC-C4       |
| CTGCGAG db/db1  | db/db | 1717 | 0.012052 | FALSE | 1.570397 | FALSE | Endothelia Capillary E |
| CTGCGAG db/db1  | db/db | 1500 | 0.011081 | FALSE | 1.18866  | FALSE | Endothelia Aterial EC  |
| CTGCGAG db/db1  | db/db | 477  | 0.082569 | FALSE | 2.223974 | FALSE | Muller cell            |
| CTGCGAG db/db1  | db/db | 424  | 0.018761 | FALSE | 2.693837 | FALSE | Photoreceptor          |
| CTGCGAG db/db1  | db/db | 442  | 0.020908 | FALSE | 1.688208 | FALSE | Endothelia Aterial EC  |
| CTGCGAG db/db1  | db/db | 8150 | 0.030318 | FALSE | 0.338063 | FALSE | Photoreceptor          |
| CTGCGAG db/db1  | db/db | 441  | 0.023682 | FALSE | 3.98633  | FALSE | Muller cell            |
| CTGCTCAA db/db1 | db/db | 729  | 0.060641 | FALSE | 2.325253 | FALSE | Photoreceptor          |
| CTGCTCAA db/db1 | db/db | 1724 | 0.063221 | FALSE | 1.061633 | FALSE | Photoreceptor          |
| CTGCTCAA db/db1 | db/db | 1339 | 0.016488 | FALSE | 1.30475  | FALSE | Endothelia Capillary E |
| CTGCTCAC db/db1 | db/db | 712  | 0.036232 | FALSE | 0.963124 | FALSE | Photoreceptor          |
| CTGCTCAC db/db1 | db/db | 741  | 0.047807 | FALSE | 2.129682 | FALSE | Photoreceptor          |
| CTGCTCAG db/db1 | db/db | 452  | 0.017114 | FALSE | 2.191012 | FALSE | Endothelia Capillary E |
| CTGCTCAG db/db1 | db/db | 1794 | 0.098234 | FALSE | 5.162804 | TRUE  |                        |
| CTGCTCAG db/db1 | db/db | 1307 | 0.088776 | FALSE | 1.668384 | FALSE | Photoreceptor          |
| CTGCTCAT db/db1 | db/db | 2820 | 0.030318 | FALSE | 0.813214 | FALSE | Photoreceptor          |
| CTGCTCAT db/db1 | db/db | 1077 | 0.057037 | FALSE | 1.088052 | FALSE | Photoreceptor          |
| CTGCTCAT db/db1 | db/db | 9079 | 0.109375 | TRUE  | 0.945415 | FALSE |                        |
| CTGCTCAT db/db1 | db/db | 799  | 0.054795 | FALSE | 1.645114 | FALSE | Photoreceptor          |
| CTGCTCAT db/db1 | db/db | 2717 | 0.016181 | FALSE | 1.073858 | FALSE | Endothelia Venous EC   |
| CTGCTCAT db/db1 | db/db | 702  | 0.054795 | FALSE | 0.578684 | FALSE | Photoreceptor          |
| CTGGACG db/db1  | db/db | 2168 | 0.027273 | FALSE | 1.03879  | FALSE | Endothelia Capillary E |
| CTGGACG db/db1  | db/db | 2917 | 0.138889 | TRUE  | 3.469933 | FALSE |                        |
| CTGGACG db/db1  | db/db | 1621 | 0.017758 | FALSE | 0.513828 | FALSE | Photoreceptor          |
| CTGGACG db/db1  | db/db | 1640 | 0.017434 | FALSE | 1.114672 | FALSE | Endothelia Capillary E |
| CTGGCAG db/db1  | db/db | 4355 | 0.023682 | FALSE | 0.835887 | FALSE | Photoreceptor          |
| CTGGCAG db/db1  | db/db | 2058 | 0.012303 | FALSE | 1.121442 | FALSE | Endothelia Venous EC   |
| CTGGCAG db/db1  | db/db | 2489 | 0.030859 | FALSE | 1.04229  | FALSE | Endothelia EC-C4       |
| CTGGCAG db/db1  | db/db | 1820 | 0.028754 | FALSE | 0.4936   | FALSE | Photoreceptor          |
| CTGGCAG db/db1  | db/db | 642  | 0.046025 | FALSE | 3.011689 | FALSE | Photoreceptor          |
| CTGGCAG db/db1  | db/db | 7464 | 0.17103  | TRUE  | 1.724835 | FALSE |                        |
| CTGGCAG db/db1  | db/db | 931  | 0.095727 | FALSE | 0.974195 | FALSE | Photoreceptor          |
| CTGGCAG db/db1  | db/db | 7157 | 0.014429 | FALSE | 0.551255 | FALSE | Photoreceptor          |
| CTGGTCTA db/db1 | db/db | 908  | 0.028754 | FALSE | 1.248821 | FALSE | Endothelia Capillary E |
| CTGGTCTA db/db1 | db/db | 2349 | 0.054795 | FALSE | 0.929915 | FALSE | Photoreceptor          |
| CTGGTCTA db/db1 | db/db | 1222 | 0.046906 | FALSE | 1.352656 | FALSE | Photoreceptor          |
| CTGGTCTC db/db1 | db/db | 645  | 0.064568 | FALSE | 2.924115 | FALSE | Photoreceptor          |
| CTGGTCTC db/db1 | db/db | 2971 | 0.026328 | FALSE | 0.973025 | FALSE | Neuron                 |
| CTGGTCTT db/db1 | db/db | 5398 | 0.029266 | FALSE | 0.636268 | FALSE | Photoreceptor          |
| CTGGTCTT db/db1 | db/db | 635  | 0.075259 | FALSE | 0.779473 | FALSE | Photoreceptor          |
| CTGTACCA db/db1 | db/db | 7434 | 0.021286 | FALSE | 0.520944 | FALSE | Photoreceptor          |



|                 |       |      |          |       |          |       |                        |
|-----------------|-------|------|----------|-------|----------|-------|------------------------|
| CTGTACCC db/db1 | db/db | 2243 | 0.070386 | FALSE | 0.721613 | FALSE | Photoreceptor          |
| CTGTACCC db/db1 | db/db | 1348 | 0.076994 | FALSE | 1.040114 | FALSE | Photoreceptor          |
| CTGTACCC db/db1 | db/db | 1023 | 0.024534 | FALSE | 0.964098 | FALSE | Endothelia Capillary E |
| CTGTACCC db/db1 | db/db | 3756 | 0.022455 | FALSE | 1.024341 | FALSE | Endothelia Capillary E |
| CTGTACCT db/db1 | db/db | 7017 | 0.040404 | FALSE | 0.411234 | FALSE | Photoreceptor          |
| CTGTAGA db/db1  | db/db | 463  | 0.029787 | FALSE | 1.590345 | FALSE | Photoreceptor          |
| CTGTAGA db/db1  | db/db | 1461 | 0.017758 | FALSE | 1.167973 | FALSE | Endothelia Capillary E |
| CTGTAGAC db/db1 | db/db | 1985 | 0.01981  | FALSE | 0.930606 | FALSE | Endothelia Venous EC   |
| CTGTAGAT db/db1 | db/db | 1332 | 0.075259 | FALSE | 5.23832  | TRUE  |                        |
| CTGTAGAT db/db1 | db/db | 3787 | 0.031973 | FALSE | 0.799941 | FALSE | Photoreceptor          |
| CTGTAGAT db/db1 | db/db | 3859 | 0.382671 | TRUE  | 2.125495 | FALSE |                        |
| CTGTATTA db/db1 | db/db | 814  | 0.015581 | FALSE | 1.590682 | FALSE | Endothelia Capillary E |
| CTGTATTC db/db1 | db/db | 8767 | 0.015581 | FALSE | 0.285438 | FALSE | Photoreceptor          |
| CTGTATTC db/db1 | db/db | 2662 | 0.046906 | FALSE | 0.786964 | FALSE | Photoreceptor          |
| CTGTATTG db/db1 | db/db | 1381 | 0.068864 | FALSE | 1.332331 | FALSE | Photoreceptor          |
| CTGTATTG db/db1 | db/db | 1686 | 0.125386 | TRUE  | 0.766818 | FALSE |                        |
| CTGTATTG db/db1 | db/db | 1149 | 0.020171 | FALSE | 1.166668 | FALSE | Endothelia Capillary E |
| CTGTATTG db/db1 | db/db | 4247 | 0.017758 | FALSE | 0.587401 | FALSE | Photoreceptor          |
| CTGTATTT db/db1 | db/db | 4933 | 0.164835 | TRUE  | 1.847788 | FALSE |                        |
| CTGTATTT db/db1 | db/db | 3090 | 0.039671 | FALSE | 0.566074 | FALSE | Neuron                 |
| CTGTCGTA db/db1 | db/db | 4438 | 0.017114 | FALSE | 0.611451 | FALSE | Photoreceptor          |
| CTGTCGTA db/db1 | db/db | 834  | 0.13452  | TRUE  | 7.041073 | TRUE  |                        |
| CTGTCGTA db/db1 | db/db | 1328 | 0.027758 | FALSE | 1.825166 | FALSE | Endothelia Capillary E |
| CTGTCGTC db/db1 | db/db | 1542 | 0.021669 | FALSE | 0.762714 | FALSE | Endothelia EC-C4       |
| CTGTCGTC db/db1 | db/db | 4437 | 0.032546 | FALSE | 0.83287  | FALSE | Endothelia Venous EC   |
| CTGTCGTC db/db1 | db/db | 643  | 0.034334 | FALSE | 1.121564 | FALSE | Photoreceptor          |
| CTGTCGTC db/db1 | db/db | 592  | 0.061912 | FALSE | 1.285609 | FALSE | Photoreceptor          |
| CTGTCGTT db/db1 | db/db | 4111 | 0.019106 | FALSE | 0.809179 | FALSE | Endothelia Capillary E |
| CTGTCGTT db/db1 | db/db | 5800 | 0.024534 | FALSE | 0.652308 | FALSE | Photoreceptor          |
| CTGTGAA db/db1  | db/db | 416  | 0.126437 | TRUE  | 7.899462 | TRUE  |                        |
| CTGTGAA db/db1  | db/db | 3184 | 0.028251 | FALSE | 0.989592 | FALSE | Photoreceptor          |
| CTGTGAAC db/db1 | db/db | 7300 | 0.022455 | FALSE | 0.604006 | FALSE | Photoreceptor          |
| CTGTGAAC db/db1 | db/db | 2022 | 0.029266 | FALSE | 0.390104 | FALSE | Photoreceptor          |
| CTGTGAAC db/db1 | db/db | 6423 | 0.046906 | FALSE | 0.84916  | FALSE | Photoreceptor          |
| CTGTGGG db/db1  | db/db | 747  | 0.022059 | FALSE | 2.916512 | FALSE | Muller cell            |
| CTGTGGG db/db1  | db/db | 1287 | 0.017434 | FALSE | 1.157916 | FALSE | Endothelia Capillary E |
| CTGTGGG db/db1  | db/db | 4431 | 0.073582 | FALSE | 0.877341 | FALSE | Endothelia Venous EC   |
| CTGTGGG db/db1  | db/db | 519  | 0.041154 | FALSE | 1.636512 | FALSE | Endothelia Venous EC   |
| CTGTGGG db/db1  | db/db | 6719 | 0.023682 | FALSE | 0.697707 | FALSE | Photoreceptor          |
| CTGTGGG db/db1  | db/db | 2193 | 0.023266 | FALSE | 0.944502 | FALSE | Photoreceptor          |
| CTGTGGG db/db1  | db/db | 1715 | 0.067388 | FALSE | 1.621356 | FALSE | Endothelia EC-C4       |
| CTGTGGG db/db1  | db/db | 1734 | 0.046906 | FALSE | 1.468072 | FALSE | Photoreceptor          |
| CTGTGGG db/db1  | db/db | 2123 | 0.007833 | FALSE | 1.20243  | FALSE | Photoreceptor          |
| CTGTGGG db/db1  | db/db | 3004 | 0.034954 | FALSE | 1.052316 | FALSE | Endothelia Capillary E |
| CTGTGGG db/db1  | db/db | 3647 | 0.143501 | TRUE  | 11.65982 | TRUE  |                        |
| CTGTGGG db/db1  | db/db | 2535 | 0.059406 | FALSE | 0.882952 | FALSE | Microglia              |
| CTGTGGG db/db1  | db/db | 2592 | 0.013605 | FALSE | 0.997322 | FALSE | Endothelia EC-C4       |

|          |        |       |      |          |       |          |       |                        |
|----------|--------|-------|------|----------|-------|----------|-------|------------------------|
| CTGTGGG  | db/db1 | db/db | 1428 | 0.021669 | FALSE | 1.230046 | FALSE | Endothelia Capillary E |
| CTGTGGG  | db/db1 | db/db | 1008 | 0.051646 | FALSE | 2.004997 | FALSE | Photoreceptor          |
| CTGTGGG  | db/db1 | db/db | 344  | 0.078788 | FALSE | 12.35741 | TRUE  |                        |
| CTTACCGA | db/db1 | db/db | 8808 | 0.025868 | FALSE | 0.388514 | FALSE | Photoreceptor          |
| CTTACCGC | db/db1 | db/db | 4505 | 0.029787 | FALSE | 0.717126 | FALSE | Photoreceptor          |
| CTTACCGC | db/db1 | db/db | 1956 | 0.120957 | TRUE  | 1.213796 | FALSE |                        |
| CTTACCGC | db/db1 | db/db | 4212 | 0.020908 | FALSE | 0.779874 | FALSE | Photoreceptor          |
| CTTACCGC | db/db1 | db/db | 4442 | 0.052669 | FALSE | 1.021479 | FALSE | Photoreceptor          |
| CTTACCGC | db/db1 | db/db | 2111 | 0.037564 | FALSE | 1.136534 | FALSE | Photoreceptor          |
| CTTACCGC | db/db1 | db/db | 8247 | 0.028251 | FALSE | 0.381354 | FALSE | Photoreceptor          |
| CTTACCGC | db/db1 | db/db | 4111 | 0.054795 | FALSE | 0.965532 | FALSE | Photoreceptor          |
| CTTACCGT | db/db1 | db/db | 2560 | 0.028251 | FALSE | 1.000086 | FALSE | Endothelia Venous EC   |
| CTTAGGA  | db/db1 | db/db | 2599 | 0.012814 | FALSE | 0.884191 | FALSE | Endothelia EC-C4       |
| CTTAGGA  | db/db1 | db/db | 4386 | 0.019106 | FALSE | 0.614007 | FALSE | Photoreceptor          |
| CTTAGGA  | db/db1 | db/db | 2616 | 0.014429 | FALSE | 1.176836 | FALSE | Endothelia Venous EC   |
| CTTAGGA  | db/db1 | db/db | 839  | 0.026328 | FALSE | 1.29658  | FALSE | Photoreceptor          |
| CTTAGGAT | db/db1 | db/db | 4950 | 0.045165 | FALSE | 1.001164 | FALSE | Photoreceptor          |
| CTTAGGAT | db/db1 | db/db | 1047 | 0.014151 | FALSE | 1.987847 | FALSE | Endothelia EC-C4       |
| CTTAGGAT | db/db1 | db/db | 3923 | 0.008438 | FALSE | 1.163309 | FALSE | Photoreceptor          |
| CTTAGGAT | db/db1 | db/db | 3172 | 0.034954 | FALSE | 0.752751 | FALSE | Photoreceptor          |
| CTTCAATA | db/db1 | db/db | 2672 | 0.014711 | FALSE | 0.961774 | FALSE | Endothelia Venous EC   |
| CTTCAATA | db/db1 | db/db | 1733 | 0.045165 | FALSE | 0.991534 | FALSE | Photoreceptor          |
| CTTCAATA | db/db1 | db/db | 431  | 0.098234 | FALSE | 21.5208  | TRUE  |                        |
| CTTCAATA | db/db1 | db/db | 1402 | 0.033726 | FALSE | 1.117145 | FALSE | Photoreceptor          |
| CTTCAATC | db/db1 | db/db | 4377 | 0.192271 | TRUE  | 2.232771 | FALSE |                        |
| CTTCAATC | db/db1 | db/db | 2793 | 0.08663  | FALSE | 0.950716 | FALSE | Photoreceptor          |
| CTTCAATC | db/db1 | db/db | 736  | 0.025416 | FALSE | 1.705836 | FALSE | Photoreceptor          |
| CTTCAATC | db/db1 | db/db | 8153 | 0.020171 | FALSE | 0.472571 | FALSE | Photoreceptor          |
| CTTCAATG | db/db1 | db/db | 1108 | 0.046906 | FALSE | 1.568573 | FALSE | Photoreceptor          |
| CTTCAATT | db/db1 | db/db | 7929 | 0.014151 | FALSE | 0.520776 | FALSE | Photoreceptor          |
| CTTCCGAA | db/db1 | db/db | 3622 | 0.026328 | FALSE | 0.89227  | FALSE | Endothelia Venous EC   |
| CTTCCGAA | db/db1 | db/db | 1437 | 0.061912 | FALSE | 1.555415 | FALSE | Photoreceptor          |
| CTTCCGAC | db/db1 | db/db | 2642 | 0.068864 | FALSE | 1.087709 | FALSE | Photoreceptor          |
| CTTCCGAC | db/db1 | db/db | 1588 | 0.012303 | FALSE | 0.995155 | FALSE | Endothelia Capillary E |
| CTTCCGAC | db/db1 | db/db | 1708 | 0.054795 | FALSE | 1.298225 | FALSE | Photoreceptor          |
| CTTCCGAG | db/db1 | db/db | 4788 | 0.023682 | FALSE | 0.722771 | FALSE | Photoreceptor          |
| CTTCCGAG | db/db1 | db/db | 959  | 0.006683 | FALSE | 1.157872 | FALSE | Endothelia Capillary E |
| CTTCCGAG | db/db1 | db/db | 522  | 0.078788 | FALSE | 3.312453 | FALSE | Muller cell            |
| CTTCCGAT | db/db1 | db/db | 2470 | 0.007441 | FALSE | 1.240551 | FALSE | Photoreceptor          |
| CTTCCGAT | db/db1 | db/db | 3808 | 0.026328 | FALSE | 1.029568 | FALSE | Endothelia Venous EC   |
| CTTCCTTA | db/db1 | db/db | 571  | 0.055901 | FALSE | 4.181304 | FALSE | Muller cell            |
| CTTCCTTA | db/db1 | db/db | 4532 | 0.030859 | FALSE | 0.849647 | FALSE | Endothelia Venous EC   |
| CTTCCTTC | db/db1 | db/db | 2391 | 0.011561 | FALSE | 0.725176 | FALSE | Endothelia Capillary E |
| CTTCCTTC | db/db1 | db/db | 2655 | 0.08663  | FALSE | 1.052812 | FALSE | Endothelia Venous EC   |
| CTTCCTTG | db/db1 | db/db | 1504 | 0.036891 | FALSE | 1.915592 | FALSE | Photoreceptor          |
| CTTCCTTT | db/db1 | db/db | 4573 | 0.033726 | FALSE | 0.82385  | FALSE | Endothelia Venous EC   |
| CTTCCTTT | db/db1 | db/db | 1152 | 0.009712 | FALSE | 1.341453 | FALSE | Endothelia Capillary E |

|                 |       |      |          |       |          |       |                        |
|-----------------|-------|------|----------|-------|----------|-------|------------------------|
| CTTCGGTA db/db1 | db/db | 4226 | 0.034954 | FALSE | 0.936581 | FALSE | Photoreceptor          |
| CTTCGGTA db/db1 | db/db | 1854 | 0.073582 | FALSE | 1.410324 | FALSE | Photoreceptor          |
| CTTCGGTA db/db1 | db/db | 1405 | 0.020908 | FALSE | 0.543652 | FALSE | Photoreceptor          |
| CTTCGGTC db/db1 | db/db | 968  | 0.058205 | FALSE | 1.688679 | FALSE | Photoreceptor          |
| CTTCGGTC db/db1 | db/db | 3950 | 0.044326 | FALSE | 0.600833 | FALSE | Photoreceptor          |
| CTTCGGTC db/db1 | db/db | 6476 | 0.17103  | TRUE  | 1.207356 | FALSE |                        |
| CTTCGGTC db/db1 | db/db | 495  | 0.054795 | FALSE | 2.102681 | FALSE | Photoreceptor          |
| CTTCGGTC db/db1 | db/db | 2769 | 0.03313  | FALSE | 1.0915   | FALSE | Endothelia Venous EC   |
| CTTCGGTC db/db1 | db/db | 512  | 0.031411 | FALSE | 1.783933 | FALSE | Microglia              |
| CTTCGGTC db/db1 | db/db | 5559 | 0.034954 | FALSE | 0.746338 | FALSE | Photoreceptor          |
| CTTCGGTC db/db1 | db/db | 1573 | 0.060641 | FALSE | 8.342246 | TRUE  |                        |
| CTTCGGTC db/db1 | db/db | 506  | 0.047807 | FALSE | 2.221307 | FALSE | Photoreceptor          |
| CTTCGGTT db/db1 | db/db | 770  | 0.052669 | FALSE | 2.609271 | FALSE | Photoreceptor          |
| CTTCGGTT db/db1 | db/db | 481  | 0.065957 | FALSE | 1.134386 | FALSE | Photoreceptor          |
| CTTCTAAA db/db1 | db/db | 447  | 0.076994 | FALSE | 3.034532 | FALSE | Endothelia Capillary E |
| CTTCTAAA db/db1 | db/db | 7095 | 0.280108 | TRUE  | 1.554951 | FALSE |                        |
| CTTCTAAA db/db1 | db/db | 1194 | 0.032546 | FALSE | 0.676784 | FALSE | Photoreceptor          |
| CTTCTAAC db/db1 | db/db | 601  | 0.023682 | FALSE | 1.407938 | FALSE | Photoreceptor          |
| CTTCTAAC db/db1 | db/db | 3669 | 0.059406 | FALSE | 1.031035 | FALSE | Photoreceptor          |
| CTTCTAAC db/db1 | db/db | 3250 | 0.05065  | FALSE | 0.723097 | FALSE | Photoreceptor          |
| CTTCTAAC db/db1 | db/db | 2143 | 0.08663  | FALSE | 1.11619  | FALSE | Photoreceptor          |
| CTTCTAAG db/db1 | db/db | 3381 | 0.010614 | FALSE | 1.439481 | FALSE | Photoreceptor          |
| CTTCTAAG db/db1 | db/db | 439  | 0.034954 | FALSE | 3.945771 | FALSE | Muller cell            |
| CTTCTAAT db/db1 | db/db | 5962 | 0.037564 | FALSE | 0.767678 | FALSE | Endothelia Venous EC   |
| CTTCTCTA db/db1 | db/db | 4001 | 0.008644 | FALSE | 0.865503 | FALSE | Endothelia Venous EC   |
| CTTCTCTA db/db1 | db/db | 3137 | 0.016181 | FALSE | 0.919192 | FALSE | Endothelia Capillary E |
| CTTCTCTA db/db1 | db/db | 1528 | 0.020908 | FALSE | 0.843174 | FALSE | Photoreceptor          |
| CTTCTCTA db/db1 | db/db | 969  | 0.057037 | FALSE | 0.892857 | FALSE | Photoreceptor          |
| CTTCTCTA db/db1 | db/db | 1602 | 0.022857 | FALSE | 0.596281 | FALSE | Photoreceptor          |
| CTTCTCTC db/db1 | db/db | 689  | 0.020171 | FALSE | 0.985054 | FALSE | Photoreceptor          |
| CTTCTCTG db/db1 | db/db | 460  | 0.009277 | FALSE | 1.325275 | FALSE | Photoreceptor          |
| CTTCTCTG db/db1 | db/db | 792  | 0.048732 | FALSE | 4.315081 | FALSE | Muller cell            |
| CTTCTCTG db/db1 | db/db | 2177 | 0.05065  | FALSE | 1.106513 | FALSE | Endothelia EC-C4       |
| CTTCTCTG db/db1 | db/db | 2729 | 0.024971 | FALSE | 0.488865 | FALSE | Endothelia Venous EC   |
| CTTCTCTT db/db1 | db/db | 508  | 0.012557 | FALSE | 1.439893 | FALSE | Photoreceptor          |
| CTTCTCTT db/db1 | db/db | 1160 | 0.026796 | FALSE | 1.737868 | FALSE | Endothelia Capillary E |
| CTTGAGAT db/db1 | db/db | 2202 | 0.022059 | FALSE | 0.19648  | FALSE | Photoreceptor          |
| CTTGAGAT db/db1 | db/db | 2097 | 0.020908 | FALSE | 1.081839 | FALSE | Endothelia Capillary E |
| CTTGAGAT db/db1 | db/db | 4559 | 0.048732 | FALSE | 0.762769 | FALSE | Endothelia Venous EC   |
| CTTGAGAC db/db1 | db/db | 4157 | 0.029266 | FALSE | 0.837038 | FALSE | Endothelia Venous EC   |
| CTTGAGAC db/db1 | db/db | 2602 | 0.029266 | FALSE | 1.047543 | FALSE | Endothelia Capillary E |
| CTTGAGAC db/db1 | db/db | 1429 | 0.010384 | FALSE | 1.205937 | FALSE | Endothelia Aterial EC  |
| CTTGAGAC db/db1 | db/db | 1794 | 0.006317 | FALSE | 1.359118 | FALSE | Endothelia Capillary E |
| CTTGAGAC db/db1 | db/db | 1529 | 0.025868 | FALSE | 1.046133 | FALSE | Endothelia Venous EC   |
| CTTGAGAC db/db1 | db/db | 4294 | 0.138889 | TRUE  | 2.920036 | FALSE |                        |
| CTTGAGAC db/db1 | db/db | 1407 | 0.084562 | FALSE | 1.265032 | FALSE | Endothelia Capillary E |
| CTTGAGAC db/db1 | db/db | 489  | 0.093319 | FALSE | 2.122712 | FALSE | Photoreceptor          |

|                 |       |      |          |       |          |       |                        |
|-----------------|-------|------|----------|-------|----------|-------|------------------------|
| CTTGAGAC db/db1 | db/db | 1357 | 0.078788 | FALSE | 1.840823 | FALSE | Photoreceptor          |
| CTTGAGAT db/db1 | db/db | 633  | 0.025416 | FALSE | 2.987806 | FALSE | Muller cell            |
| CTTGATTG db/db1 | db/db | 1170 | 0.033726 | FALSE | 1.073798 | FALSE | Photoreceptor          |
| CTTTCAAA db/db1 | db/db | 682  | 0.014711 | FALSE | 2.334507 | FALSE | Pericyte               |
| CTTTCAAA db/db1 | db/db | 756  | 0.013074 | FALSE | 0.783735 | FALSE | Photoreceptor          |
| CTTTCAAC db/db1 | db/db | 3407 | 0.008234 | FALSE | 0.923254 | FALSE | Endothelia EC-C4       |
| CTTTCAAC db/db1 | db/db | 6864 | 0.063221 | FALSE | 0.949409 | FALSE | Neuron                 |
| CTTTCAAC db/db1 | db/db | 671  | 0.018761 | FALSE | 0.554363 | FALSE | Photoreceptor          |
| CTTTCAAG db/db1 | db/db | 3633 | 0.027758 | FALSE | 0.907106 | FALSE | Endothelia Venous EC   |
| CTTTCAAG db/db1 | db/db | 1153 | 0.007441 | FALSE | 2.141345 | FALSE | Endothelia Capillary E |
| CTTTCAAG db/db1 | db/db | 980  | 0.020171 | FALSE | 1.887095 | FALSE | Pericyte               |
| CTTTCAAT db/db1 | db/db | 477  | 0.047807 | FALSE | 1.849182 | FALSE | Photoreceptor          |
| CTTTCGGA db/db1 | db/db | 4011 | 0.022059 | FALSE | 0.908247 | FALSE | Photoreceptor          |
| CTTTCGGT db/db1 | db/db | 6436 | 0.023266 | FALSE | 0.503515 | FALSE | Photoreceptor          |
| CTTTCGGT db/db1 | db/db | 668  | 0.012814 | FALSE | 0.935807 | FALSE | Endothelia Capillary E |
| CTTTCGGT db/db1 | db/db | 588  | 0.095727 | FALSE | 6.553398 | TRUE  |                        |
| CTTTCGGT db/db1 | db/db | 440  | 0.068864 | FALSE | 1.865094 | FALSE | Endothelia Capillary E |
| GAAACCT# db/db1 | db/db | 1053 | 0.016488 | FALSE | 1.08167  | FALSE | Photoreceptor          |
| GAAACCT# db/db1 | db/db | 1268 | 0.031411 | FALSE | 0.943499 | FALSE | Photoreceptor          |
| GAAACCTC db/db1 | db/db | 1617 | 0.116912 | TRUE  | 4.874835 | FALSE |                        |
| GAAACCTC db/db1 | db/db | 1740 | 0.058205 | FALSE | 1.212715 | FALSE | Endothelia Aterial EC  |
| GAAACCTI db/db1 | db/db | 4714 | 0.014711 | FALSE | 0.612958 | FALSE | Photoreceptor          |
| GAAATGA( db/db1 | db/db | 573  | 0.143501 | TRUE  | 11.30653 | TRUE  |                        |
| GAAATGA( db/db1 | db/db | 958  | 0.014151 | FALSE | 1.399909 | FALSE | Photoreceptor          |
| GAAATGA( db/db1 | db/db | 406  | 0.032546 | FALSE | 3.108126 | FALSE | Endothelia Capillary E |
| GAAATGA` db/db1 | db/db | 2560 | 0.063221 | FALSE | 1.236071 | FALSE | Endothelia Venous EC   |
| GAACACT# db/db1 | db/db | 2876 | 0.024105 | FALSE | 0.737253 | FALSE | Endothelia EC-C4       |
| GAACACT# db/db1 | db/db | 4888 | 0.035586 | FALSE | 0.835454 | FALSE | Endothelia Venous EC   |
| GAACACT# db/db1 | db/db | 636  | 0.021286 | FALSE | 0.485927 | FALSE | Photoreceptor          |
| GAACACTC db/db1 | db/db | 1069 | 0.038953 | FALSE | 2.101181 | FALSE | Muller cell            |
| GAACACTC db/db1 | db/db | 1248 | 0.060641 | FALSE | 2.173584 | FALSE | Muller cell            |
| GAACACTC db/db1 | db/db | 1427 | 0.055901 | FALSE | 2.354066 | FALSE | Muller cell            |
| GAACACTC db/db1 | db/db | 794  | 0.13452  | TRUE  | 1.969981 | FALSE |                        |
| GAACACTI db/db1 | db/db | 5993 | 0.411992 | TRUE  | 1.730697 | FALSE |                        |
| GAACACTI db/db1 | db/db | 1980 | 0.061912 | FALSE | 1.378873 | FALSE | Endothelia Venous EC   |
| GAACACTI db/db1 | db/db | 469  | 0.008852 | FALSE | 1.19712  | FALSE | Photoreceptor          |
| GAACGTT# db/db1 | db/db | 2104 | 0.115723 | TRUE  | 9.121534 | TRUE  |                        |
| GAACGTT# db/db1 | db/db | 8119 | 0.022857 | FALSE | 0.559875 | FALSE | Photoreceptor          |
| GAACGTTC db/db1 | db/db | 659  | 0.027273 | FALSE | 2.814385 | FALSE | Muller cell            |
| GAACGTTC db/db1 | db/db | 3900 | 0.057037 | FALSE | 0.920567 | FALSE | Endothelia Venous EC   |
| GAACGTTI db/db1 | db/db | 1115 | 0.014429 | FALSE | 1.677998 | FALSE | Endothelia Capillary E |
| GAACGTTI db/db1 | db/db | 629  | 0.009493 | FALSE | 1.407197 | FALSE | Endothelia Capillary E |
| GAACGTTI db/db1 | db/db | 500  | 0.030859 | FALSE | 3.23826  | FALSE | Muller cell            |
| GAACGTG# db/db1 | db/db | 1621 | 0.036232 | FALSE | 0.95607  | FALSE | Photoreceptor          |
| GAACGTG# db/db1 | db/db | 5463 | 0.076994 | FALSE | 0.658011 | FALSE | Endothelia EC-C4       |
| GAACGTG# db/db1 | db/db | 631  | 0.03313  | FALSE | 0.904449 | FALSE | Photoreceptor          |
| GAACGTGC db/db1 | db/db | 5827 | 0.015581 | FALSE | 0.721044 | FALSE | Photoreceptor          |

|         |        |       |      |          |       |          |       |                        |
|---------|--------|-------|------|----------|-------|----------|-------|------------------------|
| GAAGTGT | db/db1 | db/db | 1006 | 0.037564 | FALSE | 2.925416 | FALSE | Muller cell            |
| GAAGTGT | db/db1 | db/db | 1315 | 0.019106 | FALSE | 1.00257  | FALSE | Endothelia Capillary E |
| GAAGTGT | db/db1 | db/db | 1673 | 0.027758 | FALSE | 1.413039 | FALSE | Endothelia Capillary E |
| GAAGTGT | db/db1 | db/db | 1033 | 0.071958 | FALSE | 1.299682 | FALSE | Photoreceptor          |
| GAAGAAT | db/db1 | db/db | 6735 | 0.026328 | FALSE | 0.447238 | FALSE | Photoreceptor          |
| GAAGAAT | db/db1 | db/db | 1718 | 0.007636 | FALSE | 1.067683 | FALSE | Endothelia Capillary E |
| GAAGAAT | db/db1 | db/db | 2484 | 0.013605 | FALSE | 1.026079 | FALSE | Photoreceptor          |
| GAAGAAT | db/db1 | db/db | 1345 | 0.007441 | FALSE | 1.546786 | FALSE | Endothelia Capillary E |
| GAAGAAT | db/db1 | db/db | 4187 | 0.038251 | FALSE | 1.330603 | FALSE | Photoreceptor          |
| GAAGAAT | db/db1 | db/db | 2679 | 0.008644 | FALSE | 0.86297  | FALSE | Endothelia EC-C4       |
| GAAGAAT | db/db1 | db/db | 1588 | 0.014429 | FALSE | 0.33561  | FALSE | Photoreceptor          |
| GAAGAAT | db/db1 | db/db | 4982 | 0.030859 | FALSE | 0.721178 | FALSE | Photoreceptor          |
| GAAGAAT | db/db1 | db/db | 3410 | 0.052669 | FALSE | 0.979062 | FALSE | Endothelia Venous EC   |
| GAAGAAT | db/db1 | db/db | 462  | 0.032546 | FALSE | 2.327106 | FALSE | Muller cell            |
| GAAGAAT | db/db1 | db/db | 921  | 0.05065  | FALSE | 1.978208 | FALSE | Photoreceptor          |
| GAAGAAT | db/db1 | db/db | 494  | 0.037564 | FALSE | 0.63602  | FALSE | Photoreceptor          |
| GAAGAAT | db/db1 | db/db | 1739 | 0.038251 | FALSE | 1.346974 | FALSE | Endothelia EC-C4       |
| GAAGAAT | db/db1 | db/db | 2859 | 0.031973 | FALSE | 0.896059 | FALSE | Photoreceptor          |
| GAAGCCC | db/db1 | db/db | 5551 | 0.022857 | FALSE | 0.539285 | FALSE | Photoreceptor          |
| GAAGCCC | db/db1 | db/db | 394  | 0.055901 | FALSE | 2.63307  | FALSE | Photoreceptor          |
| GAAGCCC | db/db1 | db/db | 494  | 0.15354  | TRUE  | 3.241491 | FALSE |                        |
| GAAGCCC | db/db1 | db/db | 692  | 0.028251 | FALSE | 2.157122 | FALSE | Endothelia Capillary E |
| GAAGCCC | db/db1 | db/db | 652  | 0.091004 | FALSE | 2.044957 | FALSE | Photoreceptor          |
| GAAGCCC | db/db1 | db/db | 7918 | 0.014151 | FALSE | 0.447139 | FALSE | Photoreceptor          |
| GAAGCCC | db/db1 | db/db | 2096 | 0.014151 | FALSE | 1.098629 | FALSE | Endothelia Capillary E |
| GAAGCCC | db/db1 | db/db | 1042 | 0.060641 | FALSE | 1.68207  | FALSE | Photoreceptor          |
| GAAGCCC | db/db1 | db/db | 3426 | 0.019455 | FALSE | 1.106896 | FALSE | Endothelia Venous EC   |
| GAAGCCC | db/db1 | db/db | 872  | 0.045165 | FALSE | 3.02607  | FALSE | Neuron                 |
| GAAGCGA | db/db1 | db/db | 406  | 0.039671 | FALSE | 1.029189 | FALSE | Photoreceptor          |
| GAAGCGA | db/db1 | db/db | 2847 | 0.022857 | FALSE | 0.422301 | FALSE | Photoreceptor          |
| GAAGCGA | db/db1 | db/db | 2195 | 0.010384 | FALSE | 1.160871 | FALSE | Endothelia EC-C4       |
| GAAGCGA | db/db1 | db/db | 1219 | 0.044326 | FALSE | 1.63441  | FALSE | Endothelia Capillary E |
| GAAGCGA | db/db1 | db/db | 1364 | 0.082569 | FALSE | 5.811451 | TRUE  |                        |
| GAAGCGA | db/db1 | db/db | 654  | 0.067388 | FALSE | 0.89407  | FALSE | Photoreceptor          |
| GAAGCGA | db/db1 | db/db | 1276 | 0.020908 | FALSE | 2.402262 | FALSE | Muller cell            |
| GAAGCGA | db/db1 | db/db | 2256 | 0.011081 | FALSE | 0.997662 | FALSE | Endothelia Aterial EC  |
| GAAGCGA | db/db1 | db/db | 3724 | 0.046906 | FALSE | 0.649631 | FALSE | Endothelia EC-C4       |
| GAAGCGA | db/db1 | db/db | 2489 | 0.039671 | FALSE | 1.529012 | FALSE | Endothelia Capillary E |
| GAAGCGA | db/db1 | db/db | 8238 | 0.014151 | FALSE | 0.554912 | FALSE | Photoreceptor          |
| GAAGGAC | db/db1 | db/db | 3416 | 0.119124 | TRUE  | 2.890807 | FALSE |                        |
| GAAGGAC | db/db1 | db/db | 1863 | 0.060641 | FALSE | 0.93538  | FALSE | Neuron                 |
| GAAGGAC | db/db1 | db/db | 2247 | 0.065957 | FALSE | 0.869097 | FALSE | Photoreceptor          |
| GAAGGAC | db/db1 | db/db | 1377 | 0.024534 | FALSE | 0.424206 | FALSE | Photoreceptor          |
| GAAGGAC | db/db1 | db/db | 2509 | 0.037564 | FALSE | 1.103038 | FALSE | Endothelia Capillary E |
| GAAGGAC | db/db1 | db/db | 3853 | 0.029266 | FALSE | 0.786471 | FALSE | Photoreceptor          |
| GAAGGAC | db/db1 | db/db | 460  | 0.065957 | FALSE | 2.67883  | FALSE | Photoreceptor          |
| GAAGGAC | db/db1 | db/db | 1317 | 0.014997 | FALSE | 1.416432 | FALSE | Endothelia Capillary E |

|          |        |       |      |          |       |          |       |                        |
|----------|--------|-------|------|----------|-------|----------|-------|------------------------|
| GAAGGAC  | db/db1 | db/db | 1093 | 0.126958 | TRUE  | 1.776199 | FALSE |                        |
| GAAGGAC  | db/db1 | db/db | 2295 | 0.043505 | FALSE | 0.947966 | FALSE | Photoreceptor          |
| GAAGGAC  | db/db1 | db/db | 1231 | 0.656627 | TRUE  | 2.211934 | FALSE |                        |
| GAAGGAC  | db/db1 | db/db | 8190 | 0.009493 | FALSE | 0.372859 | FALSE | Photoreceptor          |
| GAAGGGT  | db/db1 | db/db | 4955 | 0.047807 | FALSE | 0.898867 | FALSE | Endothelia Capillary E |
| GAAGGGT  | db/db1 | db/db | 4134 | 0.026796 | FALSE | 0.915979 | FALSE | Endothelia Venous EC   |
| GAAGGGT  | db/db1 | db/db | 1067 | 0.028251 | FALSE | 0.825864 | FALSE | Photoreceptor          |
| GAAGGGT  | db/db1 | db/db | 3110 | 0.019455 | FALSE | 1.066228 | FALSE | Photoreceptor          |
| GAAGGGT  | db/db1 | db/db | 2436 | 0.041154 | FALSE | 1.128664 | FALSE | Photoreceptor          |
| GAAGTAA  | db/db1 | db/db | 4733 | 0.010846 | FALSE | 0.945085 | FALSE | Endothelia Venous EC   |
| GAAGTAA  | db/db1 | db/db | 775  | 0.093319 | FALSE | 2.326229 | FALSE | Endothelia Capillary E |
| GAAGTAA  | db/db1 | db/db | 430  | 0.008032 | FALSE | 2.874639 | FALSE | Endothelia Capillary E |
| GAAGTAA  | db/db1 | db/db | 3358 | 0.138889 | TRUE  | 4.679539 | FALSE |                        |
| GAAGTAA  | db/db1 | db/db | 3789 | 0.032546 | FALSE | 0.989049 | FALSE | Endothelia Capillary E |
| GAAGTAA  | db/db1 | db/db | 1861 | 0.063221 | FALSE | 0.503522 | FALSE | Photoreceptor          |
| GAAGTAA  | db/db1 | db/db | 4204 | 0.011561 | FALSE | 0.853827 | FALSE | Endothelia Venous EC   |
| GAAGTAA  | db/db1 | db/db | 395  | 0.022059 | FALSE | 3.1886   | FALSE | Photoreceptor          |
| GAAGTAA  | db/db1 | db/db | 1261 | 0.020171 | FALSE | 1.611683 | FALSE | Endothelia Capillary E |
| GAAGTAA  | db/db1 | db/db | 388  | 0.031411 | FALSE | 3.291209 | FALSE | Photoreceptor          |
| GAATAGA  | db/db1 | db/db | 4116 | 0.035586 | FALSE | 0.70607  | FALSE | Photoreceptor          |
| GAATAGA  | db/db1 | db/db | 924  | 0.030318 | FALSE | 1.455924 | FALSE | Endothelia Capillary E |
| GAATAGA  | db/db1 | db/db | 782  | 0.058205 | FALSE | 1.204503 | FALSE | Photoreceptor          |
| GAATCAC  | db/db1 | db/db | 1496 | 0.015581 | FALSE | 1.045418 | FALSE | Endothelia Aterial EC  |
| GAATCAC  | db/db1 | db/db | 3176 | 0.046906 | FALSE | 1.183897 | FALSE | Photoreceptor          |
| GAATCAC  | db/db1 | db/db | 400  | 0.031411 | FALSE | 2.230014 | FALSE | Pericyte               |
| GAATCAC  | db/db1 | db/db | 2908 | 0.016799 | FALSE | 0.990818 | FALSE | Endothelia EC-C4       |
| GAATCAC  | db/db1 | db/db | 1055 | 0.018761 | FALSE | 0.400907 | FALSE | Photoreceptor          |
| GAATCGT  | db/db1 | db/db | 3238 | 0.017114 | FALSE | 0.785358 | FALSE | Endothelia EC-C4       |
| GAATCGT  | db/db1 | db/db | 6788 | 0.024534 | FALSE | 0.770763 | FALSE | Photoreceptor          |
| GAATCGT  | db/db1 | db/db | 1536 | 0.042704 | FALSE | 1.418656 | FALSE | Endothelia Capillary E |
| GAATCGT  | db/db1 | db/db | 640  | 0.008234 | FALSE | 1.79983  | FALSE | Endothelia Capillary E |
| GACACGC  | db/db1 | db/db | 6548 | 0.016181 | FALSE | 0.535811 | FALSE | Photoreceptor          |
| GACACGC  | db/db1 | db/db | 2084 | 0.016488 | FALSE | 0.932239 | FALSE | Endothelia EC-C4       |
| GACACGC  | db/db1 | db/db | 3299 | 0.018761 | FALSE | 0.899622 | FALSE | Endothelia EC-C4       |
| GACACGC  | db/db1 | db/db | 471  | 0.022857 | FALSE | 2.740335 | FALSE | Photoreceptor          |
| GACACGC  | db/db1 | db/db | 994  | 0.047807 | FALSE | 2.110757 | FALSE | Photoreceptor          |
| GACACGC  | db/db1 | db/db | 4314 | 0.019455 | FALSE | 0.939419 | FALSE | Photoreceptor          |
| GACAGCC  | db/db1 | db/db | 414  | 0.080645 | FALSE | 1.744547 | FALSE | Endothelia Capillary E |
| GACAGCC  | db/db1 | db/db | 2717 | 0.009933 | FALSE | 0.748968 | FALSE | Endothelia EC-C4       |
| GACAGCC  | db/db1 | db/db | 762  | 0.03313  | FALSE | 0.893006 | FALSE | Photoreceptor          |
| GACAGCC  | db/db1 | db/db | 3328 | 0.014997 | FALSE | 0.955737 | FALSE | Endothelia Capillary E |
| GACAGCC  | db/db1 | db/db | 2187 | 0.051646 | FALSE | 1.301145 | FALSE | Photoreceptor          |
| GACAGCC  | db/db1 | db/db | 1351 | 0.08663  | FALSE | 1.288812 | FALSE | Photoreceptor          |
| GACAGCC  | db/db1 | db/db | 1577 | 0.017758 | FALSE | 0.990922 | FALSE | Photoreceptor          |
| GACAGCC  | db/db1 | db/db | 3601 | 0.027758 | FALSE | 0.925384 | FALSE | Endothelia Aterial EC  |
| GACATCAC | db/db1 | db/db | 2263 | 0.05065  | FALSE | 1.140057 | FALSE | Endothelia Capillary E |
| GACATCAC | db/db1 | db/db | 702  | 0.030859 | FALSE | 1.027617 | FALSE | Photoreceptor          |

|                 |       |      |          |       |          |       |                        |
|-----------------|-------|------|----------|-------|----------|-------|------------------------|
| GACATCAC db/db1 | db/db | 1742 | 0.022059 | FALSE | 1.199857 | FALSE | Endothelia Capillary E |
| GACATCAC db/db1 | db/db | 7994 | 0.012814 | FALSE | 0.771036 | FALSE | Photoreceptor          |
| GACATCAC db/db1 | db/db | 399  | 0.047807 | FALSE | 2.547945 | FALSE | Photoreceptor          |
| GACATCAC db/db1 | db/db | 8141 | 0.017758 | FALSE | 0.521552 | FALSE | Photoreceptor          |
| GACATCAT db/db1 | db/db | 1942 | 0.063221 | FALSE | 1.183214 | FALSE | Photoreceptor          |
| GACCAAT db/db1  | db/db | 878  | 0.026328 | FALSE | 1.035661 | FALSE | Photoreceptor          |
| GACCAAT db/db1  | db/db | 417  | 0.013338 | FALSE | 2.529178 | FALSE | Endothelia Capillary E |
| GACCAAT db/db1  | db/db | 1857 | 0.058205 | FALSE | 1.238327 | FALSE | Photoreceptor          |
| GACCAAT db/db1  | db/db | 7101 | 0.015581 | FALSE | 0.438709 | FALSE | Photoreceptor          |
| GACCAAT db/db1  | db/db | 411  | 0.059406 | FALSE | 2.817916 | FALSE | Photoreceptor          |
| GACCAAT db/db1  | db/db | 2194 | 0.008644 | FALSE | 0.8045   | FALSE | Neuron                 |
| GACCAAT db/db1  | db/db | 7428 | 0.012052 | FALSE | 0.615174 | FALSE | Photoreceptor          |
| GACCAAT db/db1  | db/db | 7679 | 0.021669 | FALSE | 0.42412  | FALSE | Photoreceptor          |
| GACCCAG db/db1  | db/db | 1298 | 0.030859 | FALSE | 3.112819 | FALSE | Muller cell            |
| GACCCAG db/db1  | db/db | 1000 | 0.051646 | FALSE | 0.99733  | FALSE | Photoreceptor          |
| GACCCAG db/db1  | db/db | 399  | 0.034334 | FALSE | 1.332092 | FALSE | Photoreceptor          |
| GACCCAG db/db1  | db/db | 523  | 0.048732 | FALSE | 2.846808 | FALSE | Photoreceptor          |
| GACCCAG db/db1  | db/db | 439  | 0.113205 | TRUE  | 2.003643 | FALSE |                        |
| GACCCAG db/db1  | db/db | 2954 | 0.012814 | FALSE | 0.887535 | FALSE | Endothelia Capillary E |
| GACCCAG db/db1  | db/db | 2391 | 0.029787 | FALSE | 0.930217 | FALSE | Neuron                 |
| GACCCAG db/db1  | db/db | 8746 | 0.014151 | FALSE | 0.478153 | FALSE | Photoreceptor          |
| GACCCAG db/db1  | db/db | 1802 | 0.017434 | FALSE | 0.860817 | FALSE | Endothelia Capillary E |
| GACCCAG db/db1  | db/db | 2188 | 0.028251 | FALSE | 0.935464 | FALSE | Photoreceptor          |
| GACCCAG db/db1  | db/db | 675  | 0.025416 | FALSE | 0.383173 | FALSE | Photoreceptor          |
| GACCCAG db/db1  | db/db | 3665 | 0.047807 | FALSE | 0.815057 | FALSE | Endothelia Venous EC   |
| GACCCAG db/db1  | db/db | 4598 | 0.039671 | FALSE | 0.909195 | FALSE | Photoreceptor          |
| GACCCAG db/db1  | db/db | 2316 | 0.049679 | FALSE | 0.655665 | FALSE | Photoreceptor          |
| GACCCAG db/db1  | db/db | 1961 | 0.038953 | FALSE | 1.147882 | FALSE | Pericyte               |
| GACCCTTA db/db1 | db/db | 901  | 0.020908 | FALSE | 2.181338 | FALSE | Neuron                 |
| GACCCTTA db/db1 | db/db | 3476 | 0.023266 | FALSE | 0.468208 | FALSE | Photoreceptor          |
| GACCCTTC db/db1 | db/db | 971  | 0.01981  | FALSE | 1.868659 | FALSE | Endothelia Capillary E |
| GACCCTTC db/db1 | db/db | 1120 | 0.051646 | FALSE | 1.675147 | FALSE | Photoreceptor          |
| GACCCTTC db/db1 | db/db | 390  | 0.177638 | TRUE  | 1.236476 | FALSE |                        |
| GACCCTTC db/db1 | db/db | 534  | 0.030859 | FALSE | 3.234864 | FALSE | Photoreceptor          |
| GACCCTTT db/db1 | db/db | 4129 | 0.076994 | FALSE | 0.84246  | FALSE | Photoreceptor          |
| GACCCTTT db/db1 | db/db | 2648 | 0.014711 | FALSE | 1.337627 | FALSE | Endothelia Capillary E |
| GACCGTG db/db1  | db/db | 597  | 0.031973 | FALSE | 2.111589 | FALSE | Photoreceptor          |
| GACCGTG db/db1  | db/db | 5039 | 0.021286 | FALSE | 0.732511 | FALSE | Photoreceptor          |
| GACCGTG db/db1  | db/db | 969  | 0.018088 | FALSE | 1.655804 | FALSE | Photoreceptor          |
| GACCGTG db/db1  | db/db | 1558 | 0.00687  | FALSE | 1.521977 | FALSE | Endothelia Capillary E |
| GACCGTG db/db1  | db/db | 2541 | 0.031411 | FALSE | 1.354961 | FALSE | Endothelia Capillary E |
| GACCGTG db/db1  | db/db | 1725 | 0.040404 | FALSE | 1.397766 | FALSE | Endothelia Capillary E |
| GACCGTG db/db1  | db/db | 1916 | 0.064568 | FALSE | 1.104053 | FALSE | Photoreceptor          |
| GACCGTG db/db1  | db/db | 1599 | 0.040404 | FALSE | 1.756406 | FALSE | Photoreceptor          |
| GACCTTCA db/db1 | db/db | 2054 | 0.024971 | FALSE | 0.421189 | FALSE | Photoreceptor          |
| GACCTTCA db/db1 | db/db | 1531 | 0.049679 | FALSE | 1.335635 | FALSE | Endothelia Capillary E |
| GACCTTCA db/db1 | db/db | 1135 | 0.030318 | FALSE | 1.821085 | FALSE | Endothelia Capillary E |

|                 |       |      |          |       |          |       |                        |
|-----------------|-------|------|----------|-------|----------|-------|------------------------|
| GACCTTCC db/db1 | db/db | 2666 | 0.029266 | FALSE | 1.155498 | FALSE | Endothelia Capillary E |
| GACCTTCT db/db1 | db/db | 2033 | 0.101906 | TRUE  | 1.095494 | FALSE |                        |
| GACCTTCT db/db1 | db/db | 1051 | 0.049679 | FALSE | 1.73573  | FALSE | Photoreceptor          |
| GACCTTCT db/db1 | db/db | 655  | 0.024534 | FALSE | 0.977346 | FALSE | Photoreceptor          |
| GACGCTG db/db1  | db/db | 2359 | 0.020536 | FALSE | 0.836115 | FALSE | Endothelia Venous EC   |
| GACGCTG db/db1  | db/db | 5728 | 0.018088 | FALSE | 0.683237 | FALSE | Photoreceptor          |
| GACGCTG db/db1  | db/db | 2091 | 0.10565  | TRUE  | 1.414273 | FALSE |                        |
| GACGCTG db/db1  | db/db | 2460 | 0.109375 | TRUE  | 2.449711 | FALSE |                        |
| GACGCTG db/db1  | db/db | 3879 | 0.063221 | FALSE | 0.857578 | FALSE | Endothelia EC-C4       |
| GACGCTG db/db1  | db/db | 1634 | 0.021286 | FALSE | 0.497016 | FALSE | Photoreceptor          |
| GACGCTG db/db1  | db/db | 1509 | 0.036891 | FALSE | 0.9434   | FALSE | Photoreceptor          |
| GACGCTG db/db1  | db/db | 2303 | 0.058205 | FALSE | 1.4934   | FALSE | Endothelia Capillary E |
| GACGTTA db/db1  | db/db | 1973 | 0.04192  | FALSE | 1.046488 | FALSE | Endothelia Aterial EC  |
| GACGTTA db/db1  | db/db | 2729 | 0.046025 | FALSE | 0.621332 | FALSE | Neuron                 |
| GACGTTA db/db1  | db/db | 4640 | 0.026796 | FALSE | 0.455023 | FALSE | Photoreceptor          |
| GACGTTA db/db1  | db/db | 1324 | 0.043505 | FALSE | 0.920685 | FALSE | Photoreceptor          |
| GACGTTA db/db1  | db/db | 8137 | 0.03313  | FALSE | 0.516964 | FALSE | Photoreceptor          |
| GACGTTA db/db1  | db/db | 2278 | 0.007833 | FALSE | 1.319745 | FALSE | Neuron                 |
| GACGTTA db/db1  | db/db | 1055 | 0.060641 | FALSE | 1.145234 | FALSE | Photoreceptor          |
| GACGTTA db/db1  | db/db | 3003 | 0.084562 | FALSE | 1.169886 | FALSE | Photoreceptor          |
| GACTATG db/db1  | db/db | 1899 | 0.023266 | FALSE | 0.365579 | FALSE | Photoreceptor          |
| GACTATG db/db1  | db/db | 1822 | 0.03313  | FALSE | 0.729713 | FALSE | Photoreceptor          |
| GACTATG db/db1  | db/db | 3596 | 0.021669 | FALSE | 0.899611 | FALSE | Endothelia Venous EC   |
| GACTATG db/db1  | db/db | 865  | 0.08663  | FALSE | 1.995896 | FALSE | Neuron                 |
| GACTATG db/db1  | db/db | 2422 | 0.031411 | FALSE | 0.906932 | FALSE | Photoreceptor          |
| GACTATG db/db1  | db/db | 1001 | 0.075259 | FALSE | 9.238452 | TRUE  |                        |
| GACTATG db/db1  | db/db | 1206 | 0.067388 | FALSE | 1.611355 | FALSE | Photoreceptor          |
| GACTATG db/db1  | db/db | 1193 | 0.049679 | FALSE | 0.897363 | FALSE | Photoreceptor          |
| GACTATG db/db1  | db/db | 2404 | 0.082569 | FALSE | 1.258462 | FALSE | Pericyte               |
| GACTCAA db/db1  | db/db | 2268 | 0.037564 | FALSE | 1.076258 | FALSE | Photoreceptor          |
| GACTCAA db/db1  | db/db | 358  | 0.082569 | FALSE | 4.447538 | FALSE | Photoreceptor          |
| GACTCAA db/db1  | db/db | 1017 | 0.017114 | FALSE | 2.046148 | FALSE | Muller cell            |
| GACTCAA db/db1  | db/db | 1192 | 0.044326 | FALSE | 1.869072 | FALSE | Photoreceptor          |
| GACTCAAT db/db1 | db/db | 7496 | 0.035586 | FALSE | 0.884143 | FALSE | Photoreceptor          |
| GACTCAAT db/db1 | db/db | 948  | 0.016488 | FALSE | 1.602942 | FALSE | Endothelia Aterial EC  |
| GACTCAAT db/db1 | db/db | 728  | 0.036232 | FALSE | 1.675517 | FALSE | Photoreceptor          |
| GACTCTCA db/db1 | db/db | 3263 | 0.039671 | FALSE | 1.360257 | FALSE | Photoreceptor          |
| GACTCTCA db/db1 | db/db | 7813 | 0.036232 | FALSE | 0.596825 | FALSE | Photoreceptor          |
| GACTCTCA db/db1 | db/db | 1744 | 0.044326 | FALSE | 1.126026 | FALSE | Photoreceptor          |
| GACTCTCC db/db1 | db/db | 3591 | 0.017758 | FALSE | 0.675578 | FALSE | Photoreceptor          |
| GACTCTCC db/db1 | db/db | 909  | 0.063221 | FALSE | 1.245488 | FALSE | Photoreceptor          |
| GACTCTCC db/db1 | db/db | 1943 | 0.032546 | FALSE | 0.969216 | FALSE | Photoreceptor          |
| GACTCTCT db/db1 | db/db | 3062 | 0.014997 | FALSE | 0.792484 | FALSE | Endothelia EC-C4       |
| GACTCTCT db/db1 | db/db | 8507 | 0.013338 | FALSE | 0.529884 | FALSE | Photoreceptor          |
| GACTCTCT db/db1 | db/db | 1234 | 0.112477 | TRUE  | 5.708245 | TRUE  |                        |
| GACTGAT db/db1  | db/db | 1745 | 0.007441 | FALSE | 1.027872 | FALSE | Neuron                 |
| GACTGAT db/db1  | db/db | 1380 | 0.036891 | FALSE | 3.127454 | FALSE | Muller cell            |



|                 |       |      |          |       |          |       |                        |
|-----------------|-------|------|----------|-------|----------|-------|------------------------|
| GACTGATC db/db1 | db/db | 1671 | 0.138889 | TRUE  | 6.059645 | TRUE  |                        |
| GACTGATC db/db1 | db/db | 3482 | 0.029787 | FALSE | 0.809602 | FALSE | Photoreceptor          |
| GACTGATC db/db1 | db/db | 1099 | 0.045165 | FALSE | 0.820053 | FALSE | Photoreceptor          |
| GACTGATC db/db1 | db/db | 2046 | 0.034334 | FALSE | 1.201415 | FALSE | Endothelia EC-C4       |
| GACTGATC db/db1 | db/db | 6236 | 0.016181 | FALSE | 0.535928 | FALSE | Photoreceptor          |
| GACTTCCC db/db1 | db/db | 1029 | 0.122691 | TRUE  | 1.170875 | FALSE |                        |
| GACTTCCC db/db1 | db/db | 1185 | 0.078788 | FALSE | 1.936453 | FALSE | Endothelia Capillary E |
| GACTTCCC db/db1 | db/db | 1838 | 0.109326 | TRUE  | 3.071564 | FALSE |                        |
| GACTTCCT db/db1 | db/db | 3535 | 0.022059 | FALSE | 1.004416 | FALSE | Photoreceptor          |
| GACTTCCT db/db1 | db/db | 1240 | 0.082569 | FALSE | 1.720972 | FALSE | Photoreceptor          |
| GAGAAAT db/db1  | db/db | 5162 | 0.024105 | FALSE | 0.66801  | FALSE | Endothelia EC-C4       |
| GAGAAAT db/db1  | db/db | 413  | 0.034954 | FALSE | 1.070073 | FALSE | Photoreceptor          |
| GAGAAAT db/db1  | db/db | 949  | 0.039671 | FALSE | 1.905479 | FALSE | Photoreceptor          |
| GAGAAAT db/db1  | db/db | 3739 | 0.03313  | FALSE | 0.748089 | FALSE | Endothelia Aterial EC  |
| GAGAAAT db/db1  | db/db | 3098 | 0.018088 | FALSE | 0.845558 | FALSE | Endothelia Venous EC   |
| GAGAAAT db/db1  | db/db | 518  | 0.088776 | FALSE | 3.232855 | FALSE | Muller cell            |
| GAGACCC db/db1  | db/db | 8571 | 0.038953 | FALSE | 0.500554 | FALSE | Photoreceptor          |
| GAGACCC db/db1  | db/db | 2097 | 0.098234 | FALSE | 9.638554 | TRUE  |                        |
| GAGACCC db/db1  | db/db | 1108 | 0.071958 | FALSE | 1.42536  | FALSE | Photoreceptor          |
| GAGACCC db/db1  | db/db | 764  | 0.036232 | FALSE | 2.672869 | FALSE | Photoreceptor          |
| GAGACCC db/db1  | db/db | 2608 | 0.031973 | FALSE | 1.020982 | FALSE | Endothelia Capillary E |
| GAGACTTC db/db1 | db/db | 546  | 0.051646 | FALSE | 3.583606 | FALSE | Muller cell            |
| GAGACTTC db/db1 | db/db | 3989 | 0.059406 | FALSE | 0.957918 | FALSE | Photoreceptor          |
| GAGACTTC db/db1 | db/db | 400  | 0.103567 | TRUE  | 14.91228 | TRUE  |                        |
| GAGACTTC db/db1 | db/db | 2778 | 0.03313  | FALSE | 1.156318 | FALSE | Photoreceptor          |
| GAGACTTC db/db1 | db/db | 2782 | 0.016799 | FALSE | 0.991395 | FALSE | Endothelia Venous EC   |
| GAGACTTC db/db1 | db/db | 1067 | 0.030318 | FALSE | 2.591741 | FALSE | Pericyte               |
| GAGACTTI db/db1 | db/db | 4007 | 0.060641 | FALSE | 0.82941  | FALSE | Endothelia EC-C4       |
| GAGACTTI db/db1 | db/db | 2604 | 0.126437 | TRUE  | 0.240027 | FALSE |                        |
| GAGAGGT db/db1  | db/db | 2199 | 0.027758 | FALSE | 1.071642 | FALSE | Endothelia Venous EC   |
| GAGAGGT db/db1  | db/db | 1844 | 0.029787 | FALSE | 1.506705 | FALSE | Endothelia Venous EC   |
| GAGAGGT db/db1  | db/db | 883  | 0.034954 | FALSE | 0.348346 | FALSE | Photoreceptor          |
| GAGAGGT db/db1  | db/db | 314  | 0.054795 | FALSE | 3.221042 | FALSE | Microglia              |
| GAGAGGT db/db1  | db/db | 3324 | 0.010614 | FALSE | 1.139257 | FALSE | Endothelia Venous EC   |
| GAGAGGT db/db1  | db/db | 4534 | 0.027273 | FALSE | 0.992337 | FALSE | Photoreceptor          |
| GAGAGGT db/db1  | db/db | 1638 | 0.088776 | FALSE | 1.808717 | FALSE | Endothelia Capillary E |
| GAGAGGT db/db1  | db/db | 420  | 0.052669 | FALSE | 3.527135 | FALSE | Endothelia Capillary E |
| GAGAGGT db/db1  | db/db | 697  | 0.108718 | TRUE  | 4.77707  | FALSE |                        |
| GAGAGGT db/db1  | db/db | 2247 | 0.014711 | FALSE | 1.189804 | FALSE | Endothelia EC-C4       |
| GAGAGGT db/db1  | db/db | 907  | 0.058205 | FALSE | 0.793956 | FALSE | Photoreceptor          |
| GAGATGG db/db1  | db/db | 2570 | 0.021669 | FALSE | 1.319542 | FALSE | Endothelia Capillary E |
| GAGATGG db/db1  | db/db | 576  | 0.036891 | FALSE | 1.78403  | FALSE | Photoreceptor          |
| GAGATGG db/db1  | db/db | 2132 | 0.011319 | FALSE | 0.889738 | FALSE | Endothelia Aterial EC  |
| GAGATGG db/db1  | db/db | 606  | 0.026796 | FALSE | 0.510813 | FALSE | Photoreceptor          |
| GAGATGG db/db1  | db/db | 1019 | 0.061912 | FALSE | 0.463334 | FALSE | Photoreceptor          |
| GAGATGG db/db1  | db/db | 2654 | 0.014711 | FALSE | 1.215329 | FALSE | Photoreceptor          |
| GAGATGG db/db1  | db/db | 218  | 0.106646 | TRUE  | 0.415867 | FALSE |                        |

|                |       |      |          |       |          |       |                        |
|----------------|-------|------|----------|-------|----------|-------|------------------------|
| GAGCCTG/db/db1 | db/db | 1706 | 0.015879 | FALSE | 1.131877 | FALSE | Endothelia Aterial EC  |
| GAGCCTG/db/db1 | db/db | 512  | 0.034334 | FALSE | 2.371304 | FALSE | Endothelia Capillary E |
| GAGCCTG/db/db1 | db/db | 2605 | 0.016488 | FALSE | 0.493273 | FALSE | Photoreceptor          |
| GAGCCTG/db/db1 | db/db | 2152 | 0.009933 | FALSE | 0.851033 | FALSE | Endothelia Venous EC   |
| GAGCCTG/db/db1 | db/db | 726  | 0.024534 | FALSE | 2.396803 | FALSE | Endothelia Aterial EC  |
| GAGCCTG/db/db1 | db/db | 5630 | 0.039671 | FALSE | 0.789726 | FALSE | Photoreceptor          |
| GAGCCTG/db/db1 | db/db | 4642 | 0.068864 | FALSE | 1.032371 | FALSE | Photoreceptor          |
| GAGCCTG/db/db1 | db/db | 538  | 0.045165 | FALSE | 0.883557 | FALSE | Photoreceptor          |
| GAGCCTG/db/db1 | db/db | 7918 | 0.059406 | FALSE | 0.606344 | FALSE | Photoreceptor          |
| GAGCCTG/db/db1 | db/db | 876  | 0.046025 | FALSE | 0.71096  | FALSE | Photoreceptor          |
| GAGCCTG/db/db1 | db/db | 2045 | 0.068864 | FALSE | 1.128018 | FALSE | Neuron                 |
| GAGCCTG/db/db1 | db/db | 4530 | 0.018422 | FALSE | 0.695455 | FALSE | Photoreceptor          |
| GAGCTGC/db/db1 | db/db | 1461 | 0.014151 | FALSE | 1.147893 | FALSE | Endothelia EC-C4       |
| GAGCTGC/db/db1 | db/db | 4930 | 0.029787 | FALSE | 0.923823 | FALSE | Endothelia Venous EC   |
| GAGCTGC/db/db1 | db/db | 1077 | 0.071958 | FALSE | 1.814631 | FALSE | Photoreceptor          |
| GAGCTGC/db/db1 | db/db | 492  | 0.070386 | FALSE | 17.51825 | TRUE  |                        |
| GAGCTGC/db/db1 | db/db | 3367 | 0.017758 | FALSE | 0.878002 | FALSE | Photoreceptor          |
| GAGCTGC/db/db1 | db/db | 669  | 0.036891 | FALSE | 0.997345 | FALSE | Photoreceptor          |
| GAGCTGC/db/db1 | db/db | 9013 | 0.046025 | FALSE | 0.423048 | FALSE | Photoreceptor          |
| GAGGCAA/db/db1 | db/db | 954  | 0.051646 | FALSE | 0.836767 | FALSE | Photoreceptor          |
| GAGGCAA/db/db1 | db/db | 2107 | 0.023266 | FALSE | 1.172293 | FALSE | Pericyte               |
| GAGGCAA/db/db1 | db/db | 1949 | 0.08663  | FALSE | 1.430134 | FALSE | Muller cell            |
| GAGGCAA/db/db1 | db/db | 4343 | 0.031411 | FALSE | 0.980266 | FALSE | Endothelia EC-C4       |
| GAGGCAA/db/db1 | db/db | 546  | 0.034954 | FALSE | 1.576688 | FALSE | Photoreceptor          |
| GAGGCAA/db/db1 | db/db | 404  | 0.109375 | TRUE  | 14.28572 | TRUE  |                        |
| GAGGCAA/db/db1 | db/db | 826  | 0.116411 | TRUE  | 1.800327 | FALSE |                        |
| GAGGCAA/db/db1 | db/db | 2336 | 0.018088 | FALSE | 1.241035 | FALSE | Neuron                 |
| GAGGCAA/db/db1 | db/db | 532  | 0.022455 | FALSE | 3.679879 | FALSE | Endothelia Capillary E |
| GAGGCCT/db/db1 | db/db | 3503 | 0.027273 | FALSE | 0.952428 | FALSE | Endothelia Capillary E |
| GAGGCCT/db/db1 | db/db | 1604 | 0.043505 | FALSE | 0.975698 | FALSE | Photoreceptor          |
| GAGGCCT/db/db1 | db/db | 7045 | 0.021669 | FALSE | 0.44795  | FALSE | Photoreceptor          |
| GAGGCCT/db/db1 | db/db | 940  | 0.058205 | FALSE | 1.378882 | FALSE | Photoreceptor          |
| GAGGGAT/db/db1 | db/db | 2742 | 0.020536 | FALSE | 0.94379  | FALSE | Endothelia EC-C4       |
| GAGGGAT/db/db1 | db/db | 3201 | 0.016181 | FALSE | 0.914917 | FALSE | Endothelia Aterial EC  |
| GAGGGAT/db/db1 | db/db | 2167 | 0.034334 | FALSE | 1.176053 | FALSE | Neuron                 |
| GAGGGAT/db/db1 | db/db | 1972 | 0.016181 | FALSE | 0.391344 | FALSE | Photoreceptor          |
| GAGGGTA/db/db1 | db/db | 5054 | 0.031411 | FALSE | 0.844365 | FALSE | Photoreceptor          |
| GAGGGTA/db/db1 | db/db | 766  | 0.064568 | FALSE | 1.487501 | FALSE | Photoreceptor          |
| GAGGGTA/db/db1 | db/db | 4093 | 0.022455 | FALSE | 0.845445 | FALSE | Endothelia Venous EC   |
| GAGGGTA/db/db1 | db/db | 2349 | 0.043505 | FALSE | 0.633084 | FALSE | Photoreceptor          |
| GAGGGTA/db/db1 | db/db | 785  | 0.133788 | TRUE  | 2.19106  | FALSE |                        |
| GAGGGTA/db/db1 | db/db | 875  | 0.018422 | FALSE | 1.092395 | FALSE | Endothelia EC-C4       |
| GAGGGTA/db/db1 | db/db | 3629 | 0.046906 | FALSE | 0.812609 | FALSE | Photoreceptor          |
| GAGGGTA/db/db1 | db/db | 462  | 0.043505 | FALSE | 3.011484 | FALSE | Muller cell            |
| GAGTCAT/db/db1 | db/db | 1796 | 0.019455 | FALSE | 1.01846  | FALSE | Endothelia EC-C4       |
| GAGTCAT/db/db1 | db/db | 7770 | 0.010384 | FALSE | 0.42566  | FALSE | Photoreceptor          |
| GAGTCAT/db/db1 | db/db | 899  | 0.076994 | FALSE | 2.463012 | FALSE | Muller cell            |

|                 |       |      |          |       |          |       |                        |
|-----------------|-------|------|----------|-------|----------|-------|------------------------|
| GAGTCATT db/db1 | db/db | 1376 | 0.028251 | FALSE | 0.749098 | FALSE | Photoreceptor          |
| GAGTCATT db/db1 | db/db | 408  | 0.012052 | FALSE | 1.470712 | FALSE | Endothelia Capillary E |
| GAGTCTA db/db1  | db/db | 2025 | 0.025416 | FALSE | 1.152901 | FALSE | Endothelia Venous EC   |
| GAGTCTA db/db1  | db/db | 1412 | 0.026796 | FALSE | 1.349812 | FALSE | Endothelia Capillary E |
| GAGTCTAC db/db1 | db/db | 8221 | 0.027273 | FALSE | 0.548669 | FALSE | Photoreceptor          |
| GAGTCTAC db/db1 | db/db | 1760 | 0.068864 | FALSE | 0.717999 | FALSE | Photoreceptor          |
| GAGTCTAT db/db1 | db/db | 4478 | 0.100845 | TRUE  | 2.608398 | FALSE |                        |
| GAGTCTAT db/db1 | db/db | 3855 | 0.122388 | TRUE  | 1.814609 | FALSE |                        |
| GAGTGAG db/db1  | db/db | 1881 | 0.011805 | FALSE | 1.062058 | FALSE | Endothelia EC-C4       |
| GAGTGAG db/db1  | db/db | 3921 | 0.13452  | TRUE  | 2.262017 | FALSE |                        |
| GAGTGAG db/db1  | db/db | 1680 | 0.05065  | FALSE | 1.387247 | FALSE | Photoreceptor          |
| GAGTGAG db/db1  | db/db | 390  | 0.018088 | FALSE | 0.936946 | FALSE | Pericyte               |
| GAGTGAG db/db1  | db/db | 4478 | 0.011805 | FALSE | 0.108045 | FALSE | Photoreceptor          |
| GAGTGAG db/db1  | db/db | 2084 | 0.041154 | FALSE | 1.408522 | FALSE | Endothelia Venous EC   |
| GAGTGTT db/db1  | db/db | 2926 | 0.013876 | FALSE | 1.384522 | FALSE | Photoreceptor          |
| GAGTGTT db/db1  | db/db | 1720 | 0.034954 | FALSE | 1.377084 | FALSE | Endothelia Capillary E |
| GAGTGTT db/db1  | db/db | 419  | 0.021286 | FALSE | 1.426808 | FALSE | Photoreceptor          |
| GAGTGTT db/db1  | db/db | 1137 | 0.015287 | FALSE | 1.564351 | FALSE | Pericyte               |
| GAGTGTT db/db1  | db/db | 2163 | 0.064568 | FALSE | 6.032045 | TRUE  |                        |
| GAGTTAC db/db1  | db/db | 408  | 0.060641 | FALSE | 10.06945 | TRUE  |                        |
| GAGTTAC db/db1  | db/db | 834  | 0.018761 | FALSE | 1.163784 | FALSE | Photoreceptor          |
| GAGTTAC db/db1  | db/db | 6033 | 0.024971 | FALSE | 0.708308 | FALSE | Photoreceptor          |
| GAGTTAC db/db1  | db/db | 388  | 0.088776 | FALSE | 3.66065  | FALSE | Muller cell            |
| GAGTTAC db/db1  | db/db | 1162 | 0.098234 | FALSE | 1.33746  | FALSE | Photoreceptor          |
| GAGTTAC db/db1  | db/db | 4593 | 0.13452  | TRUE  | 3.338268 | FALSE |                        |
| GAGTTAC db/db1  | db/db | 1944 | 0.019106 | FALSE | 0.879857 | FALSE | Endothelia EC-C4       |
| GAGTTAC db/db1  | db/db | 2563 | 0.039671 | FALSE | 1.371545 | FALSE | Neuron                 |
| GAGTTACT db/db1 | db/db | 429  | 0.314286 | TRUE  | 7.614213 | TRUE  |                        |
| GAGTTACT db/db1 | db/db | 1363 | 0.018088 | FALSE | 1.31294  | FALSE | Endothelia Capillary E |
| GAGTTACT db/db1 | db/db | 8554 | 0.011319 | FALSE | 0.508798 | FALSE | Photoreceptor          |
| GAGTTACT db/db1 | db/db | 1635 | 0.017434 | FALSE | 1.135902 | FALSE | Endothelia Capillary E |
| GAGTTACT db/db1 | db/db | 466  | 0.088776 | FALSE | 3.057107 | FALSE | Neuron                 |
| GAGTTACT db/db1 | db/db | 1006 | 0.039671 | FALSE | 0.94371  | FALSE | Photoreceptor          |
| GAGTTGT db/db1  | db/db | 931  | 0.018761 | FALSE | 0.608886 | FALSE | Photoreceptor          |
| GAGTTGT db/db1  | db/db | 4634 | 0.014429 | FALSE | 0.672071 | FALSE | Photoreceptor          |
| GAGTTGT db/db1  | db/db | 1547 | 0.082569 | FALSE | 0.901986 | FALSE | Photoreceptor          |
| GAGTTGT db/db1  | db/db | 655  | 0.064568 | FALSE | 1.770823 | FALSE | Photoreceptor          |
| GAGTTGT db/db1  | db/db | 1082 | 0.067388 | FALSE | 5.896657 | TRUE  |                        |
| GAGTTGT db/db1  | db/db | 1287 | 0.014429 | FALSE | 1.435077 | FALSE | Endothelia Aterial EC  |
| GAGTTGT db/db1  | db/db | 1458 | 0.024105 | FALSE | 1.45471  | FALSE | Endothelia Capillary E |
| GAGTTTG db/db1  | db/db | 412  | 0.091004 | FALSE | 8.802817 | TRUE  |                        |
| GAGTTTG db/db1  | db/db | 2049 | 0.020536 | FALSE | 1.521414 | FALSE | Endothelia Capillary E |
| GAGTTTG db/db1  | db/db | 2941 | 0.102807 | TRUE  | 0.776791 | FALSE |                        |
| GAGTTTG db/db1  | db/db | 800  | 0.038953 | FALSE | 2.73297  | FALSE | Photoreceptor          |
| GAGTTTG db/db1  | db/db | 4993 | 0.054795 | FALSE | 0.785212 | FALSE | Endothelia EC-C4       |
| GATAGAA db/db1  | db/db | 3163 | 0.022857 | FALSE | 0.925163 | FALSE | Endothelia Capillary E |
| GATAGAA db/db1  | db/db | 2453 | 0.009063 | FALSE | 0.866646 | FALSE | Endothelia Venous EC   |

|                 |       |      |          |       |          |       |                        |
|-----------------|-------|------|----------|-------|----------|-------|------------------------|
| GATAGAA(db/db1  | db/db | 5420 | 0.015581 | FALSE | 0.710286 | FALSE | Endothelia EC-C4       |
| GATAGAA(db/db1  | db/db | 1869 | 0.041154 | FALSE | 1.015572 | FALSE | Photoreceptor          |
| GATAGAA(db/db1  | db/db | 2712 | 0.020908 | FALSE | 0.329649 | FALSE | Photoreceptor          |
| GATAGAA(db/db1  | db/db | 3197 | 0.042704 | FALSE | 1.380723 | FALSE | Endothelia Capillary E |
| GATAGAA(db/db1  | db/db | 3663 | 0.010846 | FALSE | 1.181634 | FALSE | Photoreceptor          |
| GATAGAA(db/db1  | db/db | 998  | 0.058205 | FALSE | 1.0107   | FALSE | Photoreceptor          |
| GATAGAA db/db1  | db/db | 1311 | 0.023682 | FALSE | 0.3273   | FALSE | Photoreceptor          |
| GATAGAA db/db1  | db/db | 6926 | 0.017434 | FALSE | 0.408758 | FALSE | Photoreceptor          |
| GATAGCT db/db1  | db/db | 744  | 0.357022 | TRUE  | 3        | FALSE |                        |
| GATAGCT db/db1  | db/db | 6405 | 0.209157 | TRUE  | 1.353294 | FALSE |                        |
| GATAGCT db/db1  | db/db | 4078 | 0.033726 | FALSE | 1.033772 | FALSE | Endothelia Venous EC   |
| GATAGCT db/db1  | db/db | 3940 | 0.018761 | FALSE | 0.929428 | FALSE | Endothelia Capillary E |
| GATAGCT db/db1  | db/db | 1163 | 0.053718 | FALSE | 2.026068 | FALSE | Endothelia Capillary E |
| GATAGCT db/db1  | db/db | 3474 | 0.033726 | FALSE | 1.447681 | FALSE | Neuron                 |
| GATAGCT db/db1  | db/db | 1976 | 0.036891 | FALSE | 0.926328 | FALSE | Photoreceptor          |
| GATAGCT db/db1  | db/db | 4142 | 0.017114 | FALSE | 0.735181 | FALSE | Photoreceptor          |
| GATAGCT db/db1  | db/db | 527  | 0.115723 | TRUE  | 11.18509 | TRUE  |                        |
| GATAGCT db/db1  | db/db | 742  | 0.046025 | FALSE | 1.850158 | FALSE | Photoreceptor          |
| GATCACA db/db1  | db/db | 4835 | 0.053718 | FALSE | 0.962566 | FALSE | Endothelia Venous EC   |
| GATCACA db/db1  | db/db | 5217 | 0.200401 | TRUE  | 2.599678 | FALSE |                        |
| GATCACA db/db1  | db/db | 605  | 0.103567 | TRUE  | 6.377858 | TRUE  |                        |
| GATCACA db/db1  | db/db | 1743 | 0.028754 | FALSE | 1.152883 | FALSE | Endothelia EC-C4       |
| GATCACA db/db1  | db/db | 1174 | 0.058205 | FALSE | 1.277631 | FALSE | Endothelia Capillary E |
| GATCACAC db/db1 | db/db | 2100 | 0.029787 | FALSE | 1.14272  | FALSE | Pericyte               |
| GATCACAC db/db1 | db/db | 1297 | 0.013876 | FALSE | 1.056432 | FALSE | Endothelia Aterial EC  |
| GATCACAC db/db1 | db/db | 2722 | 0.022059 | FALSE | 0.704044 | FALSE | Photoreceptor          |
| GATCACAC db/db1 | db/db | 538  | 0.040404 | FALSE | 2.146006 | FALSE | Photoreceptor          |
| GATCACAC db/db1 | db/db | 2648 | 0.037564 | FALSE | 1.144417 | FALSE | Endothelia Venous EC   |
| GATCACAC db/db1 | db/db | 834  | 0.015879 | FALSE | 1.533205 | FALSE | Endothelia Capillary E |
| GATCACAC db/db1 | db/db | 2067 | 0.023266 | FALSE | 0.686672 | FALSE | Photoreceptor          |
| GATCACAT db/db1 | db/db | 846  | 0.093319 | FALSE | 10.31294 | TRUE  |                        |
| GATCACAT db/db1 | db/db | 1368 | 0.035586 | FALSE | 1.775081 | FALSE | Photoreceptor          |
| GATCACAT db/db1 | db/db | 2724 | 0.017758 | FALSE | 0.83356  | FALSE | Endothelia Venous EC   |
| GATCACAT db/db1 | db/db | 702  | 0.035586 | FALSE | 1.864053 | FALSE | Photoreceptor          |
| GATCACAT db/db1 | db/db | 712  | 0.047807 | FALSE | 1.337859 | FALSE | Photoreceptor          |
| GATCAGT db/db1  | db/db | 544  | 0.051646 | FALSE | 1.129776 | FALSE | Photoreceptor          |
| GATCAGT db/db1  | db/db | 2596 | 0.004116 | FALSE | 0.563991 | FALSE | Neuron                 |
| GATCAGT db/db1  | db/db | 3151 | 0.031411 | FALSE | 0.954284 | FALSE | Endothelia EC-C4       |
| GATCAGT db/db1  | db/db | 1157 | 0.053718 | FALSE | 1.823819 | FALSE | Photoreceptor          |
| GATCAGT db/db1  | db/db | 1912 | 0.054795 | FALSE | 1.261533 | FALSE | Photoreceptor          |
| GATCAGT db/db1  | db/db | 1982 | 0.011561 | FALSE | 1.293971 | FALSE | Endothelia Venous EC   |
| GATCAGT db/db1  | db/db | 1121 | 0.006137 | FALSE | 1.120972 | FALSE | Endothelia Capillary E |
| GATCAGT db/db1  | db/db | 1361 | 0.013876 | FALSE | 0.89268  | FALSE | Endothelia Capillary E |
| GATCAGT db/db1  | db/db | 920  | 0.054795 | FALSE | 1.789787 | FALSE | Endothelia Capillary E |
| GATCAGT db/db1  | db/db | 396  | 0.022059 | FALSE | 1.730621 | FALSE | Photoreceptor          |
| GATCAGT db/db1  | db/db | 1636 | 0.037564 | FALSE | 1.344439 | FALSE | Photoreceptor          |
| GATCAGT db/db1  | db/db | 2005 | 0.004116 | FALSE | 0.668031 | FALSE | Neuron                 |

|                 |       |      |          |       |          |       |                        |
|-----------------|-------|------|----------|-------|----------|-------|------------------------|
| GATCATG/ db/db1 | db/db | 2148 | 0.012052 | FALSE | 0.901048 | FALSE | Endothelia Aterial EC  |
| GATCATG/ db/db1 | db/db | 1898 | 0.011081 | FALSE | 1.02749  | FALSE | Endothelia Capillary E |
| GATCATG( db/db1 | db/db | 1733 | 0.015287 | FALSE | 1.601153 | FALSE | Endothelia EC-C4       |
| GATCATG( db/db1 | db/db | 958  | 0.084562 | FALSE | 2.151908 | FALSE | Photoreceptor          |
| GATCATG( db/db1 | db/db | 3477 | 0.020171 | FALSE | 0.799031 | FALSE | Photoreceptor          |
| GATCATG( db/db1 | db/db | 3049 | 0.031411 | FALSE | 0.736985 | FALSE | Photoreceptor          |
| GATCATG( db/db1 | db/db | 2706 | 0.017114 | FALSE | 0.522845 | FALSE | Photoreceptor          |
| GATCATG( db/db1 | db/db | 393  | 0.015581 | FALSE | 2.771529 | FALSE | Photoreceptor          |
| GATCATG( db/db1 | db/db | 766  | 0.032546 | FALSE | 2.372409 | FALSE | Endothelia Capillary E |
| GATCATGT db/db1 | db/db | 3978 | 0.014151 | FALSE | 0.592865 | FALSE | Endothelia EC-C4       |
| GATCCCTA db/db1 | db/db | 6208 | 0.029266 | FALSE | 0.713893 | FALSE | Photoreceptor          |
| GATCCCTA db/db1 | db/db | 2582 | 0.031973 | FALSE | 0.692233 | FALSE | Photoreceptor          |
| GATCCCTG db/db1 | db/db | 4205 | 0.023682 | FALSE | 0.898534 | FALSE | Photoreceptor          |
| GATCCCTT db/db1 | db/db | 658  | 0.046906 | FALSE | 1.697933 | FALSE | Endothelia Capillary E |
| GATCCCTT db/db1 | db/db | 4000 | 0.026328 | FALSE | 0.687264 | FALSE | Endothelia Venous EC   |
| GATCCCTT db/db1 | db/db | 915  | 0.057037 | FALSE | 1.143064 | FALSE | Photoreceptor          |
| GATCGTA/ db/db1 | db/db | 1317 | 0.029787 | FALSE | 1.881316 | FALSE | Endothelia Capillary E |
| GATCGTA( db/db1 | db/db | 2383 | 0.067388 | FALSE | 0.927909 | FALSE | Pericyte               |
| GATCGTA( db/db1 | db/db | 803  | 0.067388 | FALSE | 2.380026 | FALSE | Endothelia Capillary E |
| GATCGTA( db/db1 | db/db | 417  | 0.015287 | FALSE | 3.062632 | FALSE | Endothelia Capillary E |
| GATCGTA( db/db1 | db/db | 622  | 0.047807 | FALSE | 0.710828 | FALSE | Photoreceptor          |
| GATCGTA( db/db1 | db/db | 6118 | 0.143501 | TRUE  | 3.981076 | FALSE |                        |
| GATCGTAT db/db1 | db/db | 638  | 0.067388 | FALSE | 2.271803 | FALSE | Endothelia Capillary E |
| GATCGTAT db/db1 | db/db | 2789 | 0.148319 | TRUE  | 4.030903 | FALSE |                        |
| GATCGTAT db/db1 | db/db | 721  | 0.017434 | FALSE | 1.604896 | FALSE | Endothelia Capillary E |
| GATGACT/ db/db1 | db/db | 7830 | 0.021669 | FALSE | 0.416029 | FALSE | Photoreceptor          |
| GATGACT/ db/db1 | db/db | 2027 | 0.013605 | FALSE | 0.965766 | FALSE | Endothelia Capillary E |
| GATGACT/ db/db1 | db/db | 964  | 0.033726 | FALSE | 0.724442 | FALSE | Photoreceptor          |
| GATGACT( db/db1 | db/db | 1372 | 0.053718 | FALSE | 1.72762  | FALSE | Photoreceptor          |
| GATGACT( db/db1 | db/db | 1994 | 0.067388 | FALSE | 1.348423 | FALSE | Photoreceptor          |
| GATGACT( db/db1 | db/db | 2522 | 0.014997 | FALSE | 0.96981  | FALSE | Endothelia Capillary E |
| GATGACTI db/db1 | db/db | 3365 | 0.018088 | FALSE | 1.10637  | FALSE | Endothelia Venous EC   |
| GATGACTI db/db1 | db/db | 977  | 0.044326 | FALSE | 1.284562 | FALSE | Photoreceptor          |
| GATGAGG. db/db1 | db/db | 4578 | 0.021286 | FALSE | 0.516836 | FALSE | Photoreceptor          |
| GATGAGG. db/db1 | db/db | 2803 | 0.030318 | FALSE | 0.934127 | FALSE | Photoreceptor          |
| GATGAGG. db/db1 | db/db | 1770 | 0.009063 | FALSE | 0.771399 | FALSE | Endothelia EC-C4       |
| GATGAGG. db/db1 | db/db | 2331 | 0.003345 | FALSE | 0.988365 | FALSE | Neuron                 |
| GATGAGG. db/db1 | db/db | 1706 | 0.042704 | FALSE | 0.997935 | FALSE | Endothelia Venous EC   |
| GATGAGG( db/db1 | db/db | 1656 | 0.209157 | TRUE  | 2.679939 | FALSE |                        |
| GATGAGG( db/db1 | db/db | 4798 | 0.028251 | FALSE | 0.868601 | FALSE | Endothelia Venous EC   |
| GATGAGG( db/db1 | db/db | 1394 | 0.017758 | FALSE | 1.137972 | FALSE | Endothelia Capillary E |
| GATGAGG( db/db1 | db/db | 2555 | 0.024534 | FALSE | 1.032875 | FALSE | Endothelia Capillary E |
| GATGATC/ db/db1 | db/db | 3774 | 0.018761 | FALSE | 0.88106  | FALSE | Endothelia EC-C4       |
| GATGATC/ db/db1 | db/db | 433  | 0.034954 | FALSE | 0.781087 | FALSE | Photoreceptor          |
| GATGATC/ db/db1 | db/db | 1281 | 0.04192  | FALSE | 0.955371 | FALSE | Photoreceptor          |
| GATGATC/ db/db1 | db/db | 5659 | 0.054795 | FALSE | 0.868898 | FALSE | Photoreceptor          |
| GATGATCC db/db1 | db/db | 4034 | 0.018088 | FALSE | 0.851259 | FALSE | Photoreceptor          |

|                 |       |      |          |       |          |       |                        |
|-----------------|-------|------|----------|-------|----------|-------|------------------------|
| GATGATCC db/db1 | db/db | 7644 | 0.014429 | FALSE | 0.247758 | FALSE | Photoreceptor          |
| GATGATCC db/db1 | db/db | 705  | 0.005607 | FALSE | 2.065403 | FALSE | Pericyte               |
| GATGATCT db/db1 | db/db | 2510 | 0.026328 | FALSE | 1.304273 | FALSE | Endothelia Venous EC   |
| GATGCTA db/db1  | db/db | 373  | 0.020908 | FALSE | 0.991365 | FALSE | Pericyte               |
| GATGCTA db/db1  | db/db | 757  | 0.109375 | TRUE  | 3.864279 | FALSE |                        |
| GATGCTA db/db1  | db/db | 2056 | 0.032546 | FALSE | 1.051699 | FALSE | Photoreceptor          |
| GATGGAG db/db1  | db/db | 1402 | 0.080645 | FALSE | 1.678008 | FALSE | Photoreceptor          |
| GATGGAG db/db1  | db/db | 3236 | 0.018422 | FALSE | 0.464287 | FALSE | Photoreceptor          |
| GATGGAG db/db1  | db/db | 2262 | 0.014429 | FALSE | 0.907729 | FALSE | Endothelia Capillary E |
| GATGGAG db/db1  | db/db | 4598 | 0.209157 | TRUE  | 0.202659 | FALSE |                        |
| GATGGAG db/db1  | db/db | 1650 | 0.080645 | FALSE | 0.926239 | FALSE | Photoreceptor          |
| GATGGAG db/db1  | db/db | 1226 | 0.064568 | FALSE | 1.639883 | FALSE | Endothelia Venous EC   |
| GATGGAG db/db1  | db/db | 2348 | 0.011081 | FALSE | 0.744491 | FALSE | Endothelia EC-C4       |
| GATGGAG db/db1  | db/db | 755  | 0.051646 | FALSE | 1.197823 | FALSE | Photoreceptor          |
| GATGGAG db/db1  | db/db | 929  | 0.060641 | FALSE | 1.272383 | FALSE | Photoreceptor          |
| GATGGAG db/db1  | db/db | 433  | 0.046906 | FALSE | 2.889735 | FALSE | Muller cell            |
| GATGTTG db/db1  | db/db | 2090 | 0.036891 | FALSE | 0.986594 | FALSE | Photoreceptor          |
| GATGTTG db/db1  | db/db | 1991 | 0.053718 | FALSE | 1.10524  | FALSE | Photoreceptor          |
| GATGTTG db/db1  | db/db | 1109 | 0.03313  | FALSE | 1.444104 | FALSE | Endothelia Capillary E |
| GATGTTG db/db1  | db/db | 2739 | 0.04192  | FALSE | 0.993594 | FALSE | Microglia              |
| GATGTTG db/db1  | db/db | 9000 | 0.013338 | FALSE | 0.56456  | FALSE | Photoreceptor          |
| GATGTTG db/db1  | db/db | 2472 | 0.025416 | FALSE | 0.934958 | FALSE | Endothelia Capillary E |
| GATGTTG db/db1  | db/db | 473  | 0.03313  | FALSE | 2.955515 | FALSE | Endothelia Capillary E |
| GATGTTG db/db1  | db/db | 2146 | 0.107669 | TRUE  | 2.314977 | FALSE |                        |
| GATGTTG db/db1  | db/db | 883  | 0.022857 | FALSE | 2.220233 | FALSE | Endothelia Capillary E |
| GATGTTG db/db1  | db/db | 3339 | 0.022857 | FALSE | 0.953929 | FALSE | Photoreceptor          |
| GATGTTG db/db1  | db/db | 1969 | 0.068864 | FALSE | 1.33847  | FALSE | Photoreceptor          |
| GATGTTG db/db1  | db/db | 1632 | 0.011081 | FALSE | 1.071799 | FALSE | Endothelia EC-C4       |
| GATGTTG db/db1  | db/db | 2382 | 0.01981  | FALSE | 0.926263 | FALSE | Endothelia Aterial EC  |
| GATTCGA db/db1  | db/db | 820  | 0.04192  | FALSE | 2.725593 | FALSE | Photoreceptor          |
| GATTCGA db/db1  | db/db | 842  | 0.036891 | FALSE | 0.567361 | FALSE | Photoreceptor          |
| GATTCGA db/db1  | db/db | 2424 | 0.045165 | FALSE | 1.127102 | FALSE | Endothelia Venous EC   |
| GATTCGA db/db1  | db/db | 2294 | 0.065957 | FALSE | 0.619809 | FALSE | Endothelia EC-C4       |
| GATTCGA db/db1  | db/db | 5143 | 0.030859 | FALSE | 0.845742 | FALSE | Endothelia Venous EC   |
| GATTCGA db/db1  | db/db | 1011 | 0.015879 | FALSE | 0.543863 | FALSE | Photoreceptor          |
| GATTCGA db/db1  | db/db | 1345 | 0.05065  | FALSE | 1.048433 | FALSE | Photoreceptor          |
| GATTCTTA db/db1 | db/db | 456  | 0.029266 | FALSE | 3.806335 | FALSE | Muller cell            |
| GATTCTTA db/db1 | db/db | 6232 | 0.013876 | FALSE | 0.659915 | FALSE | Photoreceptor          |
| GATTCTTC db/db1 | db/db | 1135 | 0.137569 | TRUE  | 3.030303 | FALSE |                        |
| GATTCTTC db/db1 | db/db | 1718 | 0.047807 | FALSE | 1.237398 | FALSE | Photoreceptor          |
| GATTCTTG db/db1 | db/db | 1098 | 0.009712 | FALSE | 0.980423 | FALSE | Endothelia Capillary E |
| GATTCTTG db/db1 | db/db | 4703 | 0.026796 | FALSE | 0.824023 | FALSE | Photoreceptor          |
| GATTCTTG db/db1 | db/db | 4223 | 0.012052 | FALSE | 1.035851 | FALSE | Photoreceptor          |
| GATTCTTT db/db1 | db/db | 2796 | 0.084562 | FALSE | 1.030039 | FALSE | Photoreceptor          |
| GATTCTTT db/db1 | db/db | 3816 | 0.024971 | FALSE | 0.791278 | FALSE | Endothelia EC-C4       |
| GATTCTTT db/db1 | db/db | 5191 | 0.033726 | FALSE | 0.727652 | FALSE | Photoreceptor          |
| GATTGGT db/db1  | db/db | 3684 | 0.026796 | FALSE | 0.986295 | FALSE | Endothelia Venous EC   |

|                 |       |      |          |       |          |       |                        |
|-----------------|-------|------|----------|-------|----------|-------|------------------------|
| GATTGGT/ db/db1 | db/db | 2859 | 0.007441 | FALSE | 1.13876  | FALSE | Neuron                 |
| GATTGGT/ db/db1 | db/db | 494  | 0.029266 | FALSE | 4.094366 | FALSE | Muller cell            |
| GATTGGT/ db/db1 | db/db | 1815 | 0.058205 | FALSE | 1.614546 | FALSE | Photoreceptor          |
| GATTGGT( db/db1 | db/db | 966  | 0.061912 | FALSE | 1.856349 | FALSE | Photoreceptor          |
| GATTGGT( db/db1 | db/db | 7599 | 0.027273 | FALSE | 0.744993 | FALSE | Photoreceptor          |
| GATTGGT( db/db1 | db/db | 957  | 0.029787 | FALSE | 2.12092  | FALSE | Pericyte               |
| GATTGGT  db/db1 | db/db | 2305 | 0.018422 | FALSE | 0.892327 | FALSE | Endothelia Venous EC   |
| GATTGGT  db/db1 | db/db | 6511 | 0.015581 | FALSE | 0.608731 | FALSE | Photoreceptor          |
| GATTGGT  db/db1 | db/db | 4047 | 0.043505 | FALSE | 0.811803 | FALSE | Endothelia Venous EC   |
| GATTGGT  db/db1 | db/db | 4517 | 0.028251 | FALSE | 0.745324 | FALSE | Photoreceptor          |
| GATTGGT  db/db1 | db/db | 4705 | 0.023682 | FALSE | 0.783237 | FALSE | Photoreceptor          |
| GATTGGT  db/db1 | db/db | 6327 | 0.265464 | TRUE  | 0.455804 | FALSE |                        |
| GATTTCTA db/db1 | db/db | 8578 | 0.046906 | FALSE | 0.547561 | FALSE | Photoreceptor          |
| GATTTCTC db/db1 | db/db | 506  | 0.014429 | FALSE | 2.714611 | FALSE | Endothelia Capillary E |
| GATTTCTG db/db1 | db/db | 2621 | 0.014151 | FALSE | 1.043635 | FALSE | Photoreceptor          |
| GATTTCTG db/db1 | db/db | 4040 | 0.029266 | FALSE | 0.896267 | FALSE | Endothelia Venous EC   |
| GATTTCTG db/db1 | db/db | 2228 | 0.08663  | FALSE | 1.194156 | FALSE | Neuron                 |
| GATTTCTT db/db1 | db/db | 1204 | 0.101025 | TRUE  | 2.419955 | FALSE |                        |
| GATTTCTT db/db1 | db/db | 3803 | 0.030318 | FALSE | 0.814818 | FALSE | Endothelia EC-C4       |
| GATTTCTT db/db1 | db/db | 3061 | 0.073582 | FALSE | 1.258881 | FALSE | Photoreceptor          |
| GCAACAT( db/db1 | db/db | 1119 | 0.020536 | FALSE | 3.04644  | FALSE | Muller cell            |
| GCAACAT( db/db1 | db/db | 1268 | 0.073582 | FALSE | 1.832875 | FALSE | Endothelia EC-C4       |
| GCAACAT( db/db1 | db/db | 3005 | 0.029787 | FALSE | 1.212638 | FALSE | Photoreceptor          |
| GCAACAT( db/db1 | db/db | 8389 | 0.012303 | FALSE | 0.294365 | FALSE | Photoreceptor          |
| GCAACAT( db/db1 | db/db | 1665 | 0.034334 | FALSE | 1.247419 | FALSE | Pericyte               |
| GCAACAT( db/db1 | db/db | 1098 | 0.025868 | FALSE | 1.058242 | FALSE | Endothelia Capillary E |
| GCAACATT db/db1 | db/db | 3656 | 0.020536 | FALSE | 0.877921 | FALSE | Endothelia Venous EC   |
| GCAACCG/ db/db1 | db/db | 4744 | 0.024105 | FALSE | 0.384878 | FALSE | Photoreceptor          |
| GCAACCG/ db/db1 | db/db | 2785 | 0.022059 | FALSE | 0.50111  | FALSE | Photoreceptor          |
| GCAACCG( db/db1 | db/db | 4355 | 0.064568 | FALSE | 1.043574 | FALSE | Photoreceptor          |
| GCAACCG( db/db1 | db/db | 924  | 0.009277 | FALSE | 1.431888 | FALSE | Endothelia Capillary E |
| GCAACCG( db/db1 | db/db | 1878 | 0.021286 | FALSE | 0.85397  | FALSE | Endothelia EC-C4       |
| GCAACCG( db/db1 | db/db | 1842 | 0.109795 | TRUE  | 1.437317 | FALSE |                        |
| GCAACCG( db/db1 | db/db | 440  | 0.084562 | FALSE | 1.078248 | FALSE | Photoreceptor          |
| GCAACCG( db/db1 | db/db | 2987 | 0.043505 | FALSE | 1.158449 | FALSE | Photoreceptor          |
| GCAACCG( db/db1 | db/db | 7644 | 0.015879 | FALSE | 0.543845 | FALSE | Photoreceptor          |
| GCAACCG( db/db1 | db/db | 616  | 0.043505 | FALSE | 1.463211 | FALSE | Photoreceptor          |
| GCAACCG  db/db1 | db/db | 906  | 0.041154 | FALSE | 2.188746 | FALSE | Endothelia Capillary E |
| GCAACCG  db/db1 | db/db | 707  | 0.051646 | FALSE | 0.86069  | FALSE | Photoreceptor          |
| GCAACCG  db/db1 | db/db | 854  | 0.061912 | FALSE | 0.582496 | FALSE | Photoreceptor          |
| GCAACCG  db/db1 | db/db | 4117 | 0.022059 | FALSE | 0.891884 | FALSE | Photoreceptor          |
| GCAACCG  db/db1 | db/db | 1681 | 0.041154 | FALSE | 0.737632 | FALSE | Photoreceptor          |
| GCAACCG  db/db1 | db/db | 3340 | 0.053718 | FALSE | 1.254674 | FALSE | Photoreceptor          |
| GCACATA/ db/db1 | db/db | 6144 | 0.03313  | FALSE | 0.817319 | FALSE | Photoreceptor          |
| GCACATA( db/db1 | db/db | 3556 | 0.028754 | FALSE | 1.012296 | FALSE | Endothelia Venous EC   |
| GCACATA( db/db1 | db/db | 402  | 0.065957 | FALSE | 3.847692 | FALSE | Muller cell            |
| GCACATA( db/db1 | db/db | 3014 | 0.080645 | FALSE | 5.040669 | TRUE  |                        |

|                |       |      |          |       |          |       |                        |
|----------------|-------|------|----------|-------|----------|-------|------------------------|
| GCACATATdb/db1 | db/db | 4818 | 0.019106 | FALSE | 0.447665 | FALSE | Photoreceptor          |
| GCACATATdb/db1 | db/db | 1932 | 0.049679 | FALSE | 1.059204 | FALSE | Photoreceptor          |
| GCACATATdb/db1 | db/db | 4827 | 0.034334 | FALSE | 1.081345 | FALSE | Photoreceptor          |
| GCACGGT/db/db1 | db/db | 1743 | 0.034954 | FALSE | 0.661978 | FALSE | Photoreceptor          |
| GCACGGT/db/db1 | db/db | 3158 | 0.024105 | FALSE | 1.000699 | FALSE | Endothelia EC-C4       |
| GCACGGT/db/db1 | db/db | 2897 | 0.054795 | FALSE | 1.135732 | FALSE | Endothelia Venous EC   |
| GCACGGT/db/db1 | db/db | 3544 | 0.054795 | FALSE | 0.807044 | FALSE | Endothelia Venous EC   |
| GCACGGT/db/db1 | db/db | 581  | 0.016488 | FALSE | 0.379855 | FALSE | Photoreceptor          |
| GCACGGT/db/db1 | db/db | 472  | 0.01981  | FALSE | 1.357144 | FALSE | Photoreceptor          |
| GCACGGT/db/db1 | db/db | 773  | 0.108726 | TRUE  | 1.125704 | FALSE |                        |
| GCACGTG/db/db1 | db/db | 1351 | 0.055901 | FALSE | 1.32667  | FALSE | Pericyte               |
| GCACGTG/db/db1 | db/db | 2674 | 0.101906 | TRUE  | 0.972555 | FALSE |                        |
| GCACGTG/db/db1 | db/db | 3171 | 0.038251 | FALSE | 0.847118 | FALSE | Photoreceptor          |
| GCACGTG/db/db1 | db/db | 3695 | 0.049679 | FALSE | 0.453638 | FALSE | Endothelia EC-C4       |
| GCACGTG/db/db1 | db/db | 1135 | 0.029266 | FALSE | 0.858608 | FALSE | Photoreceptor          |
| GCACGTG/db/db1 | db/db | 679  | 0.102334 | TRUE  | 4.439511 | FALSE |                        |
| GCACGTGdb/db1  | db/db | 626  | 0.025868 | FALSE | 2.922163 | FALSE | Photoreceptor          |
| GCACGTGdb/db1  | db/db | 2966 | 0.046025 | FALSE | 0.83719  | FALSE | Photoreceptor          |
| GCACGTGdb/db1  | db/db | 4300 | 0.047807 | FALSE | 0.791974 | FALSE | Photoreceptor          |
| GCACTAA/db/db1 | db/db | 707  | 0.026796 | FALSE | 1.072103 | FALSE | Photoreceptor          |
| GCACTAA/db/db1 | db/db | 3994 | 0.032546 | FALSE | 1.159588 | FALSE | Endothelia Capillary E |
| GCACTAACdb/db1 | db/db | 4767 | 0.022857 | FALSE | 0.625468 | FALSE | Endothelia EC-C4       |
| GCACTAACdb/db1 | db/db | 2609 | 0.070386 | FALSE | 1.432348 | FALSE | Photoreceptor          |
| GCACTAACdb/db1 | db/db | 595  | 0.04192  | FALSE | 2.13859  | FALSE | Photoreceptor          |
| GCACTAACdb/db1 | db/db | 2194 | 0.071958 | FALSE | 1.033563 | FALSE | Photoreceptor          |
| GCACTAATdb/db1 | db/db | 4065 | 0.054795 | FALSE | 0.739531 | FALSE | Photoreceptor          |
| GCACTAATdb/db1 | db/db | 563  | 0.028251 | FALSE | 1.137051 | FALSE | Photoreceptor          |
| GCACTAATdb/db1 | db/db | 1601 | 0.106408 | TRUE  | 0.955414 | FALSE |                        |
| GCAGCCA/db/db1 | db/db | 1546 | 0.080645 | FALSE | 0.86942  | FALSE | Photoreceptor          |
| GCAGCCA/db/db1 | db/db | 1964 | 0.020908 | FALSE | 0.714278 | FALSE | Neuron                 |
| GCAGCCA/db/db1 | db/db | 1496 | 0.020908 | FALSE | 1.392973 | FALSE | Endothelia Capillary E |
| GCAGCCA/db/db1 | db/db | 4587 | 0.054795 | FALSE | 0.899021 | FALSE | Photoreceptor          |
| GCAGCCA/db/db1 | db/db | 2778 | 0.021669 | FALSE | 0.930243 | FALSE | Photoreceptor          |
| GCAGCCA/db/db1 | db/db | 1583 | 0.019455 | FALSE | 1.61129  | FALSE | Endothelia Capillary E |
| GCAGCCA/db/db1 | db/db | 3294 | 0.040404 | FALSE | 1.086926 | FALSE | Endothelia Venous EC   |
| GCAGCCAdb/db1  | db/db | 825  | 0.054795 | FALSE | 1.611638 | FALSE | Photoreceptor          |
| GCAGCCAdb/db1  | db/db | 1322 | 0.04192  | FALSE | 1.319464 | FALSE | Photoreceptor          |
| GCAGCTG/db/db1 | db/db | 4193 | 0.025868 | FALSE | 0.823246 | FALSE | Endothelia Venous EC   |
| GCAGCTG/db/db1 | db/db | 1209 | 0.080645 | FALSE | 1.064801 | FALSE | Photoreceptor          |
| GCAGCTG/db/db1 | db/db | 868  | 0.057037 | FALSE | 1.496844 | FALSE | Photoreceptor          |
| GCAGCTG/db/db1 | db/db | 1730 | 0.012814 | FALSE | 1.152661 | FALSE | Endothelia Capillary E |
| GCAGCTGdb/db1  | db/db | 1408 | 0.011081 | FALSE | 1.866387 | FALSE | Endothelia EC-C4       |
| GCAGCTGdb/db1  | db/db | 422  | 0.015581 | FALSE | 1.239294 | FALSE | Photoreceptor          |
| GCAGGCT/db/db1 | db/db | 1599 | 0.012557 | FALSE | 1.091881 | FALSE | Endothelia Capillary E |
| GCAGGCT/db/db1 | db/db | 522  | 0.016488 | FALSE | 2.703338 | FALSE | Photoreceptor          |
| GCAGGCT/db/db1 | db/db | 1835 | 0.038953 | FALSE | 1.149468 | FALSE | Endothelia EC-C4       |
| GCAGGCT/db/db1 | db/db | 3660 | 0.036232 | FALSE | 1.074668 | FALSE | Endothelia Capillary E |



|          |        |       |      |          |       |          |       |                        |
|----------|--------|-------|------|----------|-------|----------|-------|------------------------|
| GCAGGCT  | db/db1 | db/db | 5037 | 0.017434 | FALSE | 0.947227 | FALSE | Photoreceptor          |
| GCAGGCT  | db/db1 | db/db | 4343 | 0.200401 | TRUE  | 12.55194 | TRUE  |                        |
| GCAGTTA  | db/db1 | db/db | 760  | 0.049679 | FALSE | 1.661072 | FALSE | Neuron                 |
| GCAGTTA  | db/db1 | db/db | 1068 | 0.063221 | FALSE | 0.687299 | FALSE | Photoreceptor          |
| GCAGTTA  | db/db1 | db/db | 2307 | 0.008852 | FALSE | 1.26017  | FALSE | Endothelia EC-C4       |
| GCAGTTA  | db/db1 | db/db | 1129 | 0.073582 | FALSE | 1.91028  | FALSE | Photoreceptor          |
| GCAGTTA  | db/db1 | db/db | 472  | 0.009493 | FALSE | 0.849182 | FALSE | Endothelia EC-C4       |
| GCAGTTA  | db/db1 | db/db | 3012 | 0.060641 | FALSE | 1.193862 | FALSE | Endothelia EC-C4       |
| GCAGTTA  | db/db1 | db/db | 550  | 0.030318 | FALSE | 2.416583 | FALSE | Endothelia Capillary E |
| GCAGTTA  | db/db1 | db/db | 2241 | 0.041154 | FALSE | 0.990232 | FALSE | Photoreceptor          |
| GCAGTTA  | db/db1 | db/db | 8524 | 0.017758 | FALSE | 0.249295 | FALSE | Photoreceptor          |
| GCATCGG  | db/db1 | db/db | 1367 | 0.025416 | FALSE | 0.914367 | FALSE | Endothelia Capillary E |
| GCATCGG  | db/db1 | db/db | 1841 | 0.088776 | FALSE | 1.014017 | FALSE | Endothelia EC-C4       |
| GCATCGG  | db/db1 | db/db | 484  | 0.112477 | TRUE  | 16.57682 | TRUE  |                        |
| GCATCGG  | db/db1 | db/db | 3773 | 0.015581 | FALSE | 0.798686 | FALSE | Photoreceptor          |
| GCATCGG  | db/db1 | db/db | 3089 | 0.018422 | FALSE | 1.097364 | FALSE | Endothelia Venous EC   |
| GCATCGG  | db/db1 | db/db | 402  | 0.018761 | FALSE | 0.785225 | FALSE | Photoreceptor          |
| GCATCGG  | db/db1 | db/db | 4637 | 0.485327 | TRUE  | 3.549026 | FALSE |                        |
| GCATCTCA | db/db1 | db/db | 3652 | 0.052669 | FALSE | 1.230842 | FALSE | Photoreceptor          |
| GCATCTCA | db/db1 | db/db | 7667 | 0.334395 | TRUE  | 1.270846 | FALSE |                        |
| GCATCTCA | db/db1 | db/db | 689  | 0.071958 | FALSE | 0.883494 | FALSE | Photoreceptor          |
| GCATCTCC | db/db1 | db/db | 1578 | 0.004275 | FALSE | 1.245092 | FALSE | Neuron                 |
| GCATCTCC | db/db1 | db/db | 7531 | 0.022059 | FALSE | 0.557272 | FALSE | Photoreceptor          |
| GCATCTCT | db/db1 | db/db | 6864 | 0.017114 | FALSE | 0.743181 | FALSE | Photoreceptor          |
| GCATCTCT | db/db1 | db/db | 1044 | 0.012557 | FALSE | 1.363063 | FALSE | Endothelia Capillary E |
| GCATGAT  | db/db1 | db/db | 5952 | 0.013074 | FALSE | 0.490233 | FALSE | Photoreceptor          |
| GCATGAT  | db/db1 | db/db | 1248 | 0.009493 | FALSE | 0.923505 | FALSE | Endothelia Capillary E |
| GCATGAT  | db/db1 | db/db | 2537 | 0.057037 | FALSE | 0.658301 | FALSE | Photoreceptor          |
| GCATGAT  | db/db1 | db/db | 388  | 0.023682 | FALSE | 0.983793 | FALSE | Photoreceptor          |
| GCATGAT  | db/db1 | db/db | 411  | 0.065957 | FALSE | 2.483773 | FALSE | Photoreceptor          |
| GCATGAT  | db/db1 | db/db | 3264 | 0.048732 | FALSE | 1.069953 | FALSE | Photoreceptor          |
| GCATTAG  | db/db1 | db/db | 444  | 0.112477 | TRUE  | 9.274874 | TRUE  |                        |
| GCATTAG  | db/db1 | db/db | 7667 | 0.011561 | FALSE | 0.576156 | FALSE | Photoreceptor          |
| GCATTAG  | db/db1 | db/db | 1597 | 0.084562 | FALSE | 0.940165 | FALSE | Photoreceptor          |
| GCATTAG  | db/db1 | db/db | 3960 | 0.073582 | FALSE | 0.953538 | FALSE | Neuron                 |
| GCATTAG  | db/db1 | db/db | 983  | 0.046906 | FALSE | 1.860327 | FALSE | Photoreceptor          |
| GCATTAG  | db/db1 | db/db | 1528 | 0.021669 | FALSE | 1.176725 | FALSE | Endothelia EC-C4       |
| GCATTAG  | db/db1 | db/db | 565  | 0.054795 | FALSE | 4.146143 | FALSE | Neuron                 |
| GCATTAG  | db/db1 | db/db | 1087 | 0.015287 | FALSE | 1.973095 | FALSE | Endothelia Capillary E |
| GCATTAG  | db/db1 | db/db | 4240 | 0.026328 | FALSE | 1.036305 | FALSE | Endothelia Venous EC   |
| GCATTAG  | db/db1 | db/db | 1289 | 0.026796 | FALSE | 1.610228 | FALSE | Photoreceptor          |
| GCATTAG  | db/db1 | db/db | 3044 | 0.012557 | FALSE | 1.064273 | FALSE | Endothelia Venous EC   |
| GCATTAG  | db/db1 | db/db | 2858 | 0.046025 | FALSE | 0.56501  | FALSE | Photoreceptor          |
| GCCAACG  | db/db1 | db/db | 2148 | 0.005095 | FALSE | 1.014149 | FALSE | Neuron                 |
| GCCAACG  | db/db1 | db/db | 3035 | 0.018761 | FALSE | 0.989213 | FALSE | Endothelia Capillary E |
| GCCAACG  | db/db1 | db/db | 2189 | 0.030318 | FALSE | 1.177698 | FALSE | Endothelia EC-C4       |
| GCCAACG  | db/db1 | db/db | 4217 | 0.028251 | FALSE | 0.800421 | FALSE | Endothelia Venous EC   |

|                 |       |      |          |       |          |       |                        |
|-----------------|-------|------|----------|-------|----------|-------|------------------------|
| GCCAACG/db/db1  | db/db | 4850 | 0.021669 | FALSE | 0.658983 | FALSE | Photoreceptor          |
| GCCAACG/db/db1  | db/db | 689  | 0.060641 | FALSE | 2.992147 | FALSE | Muller cell            |
| GCCAACG/db/db1  | db/db | 6309 | 0.023682 | FALSE | 0.597983 | FALSE | Photoreceptor          |
| GCCAGCA/db/db1  | db/db | 2130 | 0.034334 | FALSE | 1.327627 | FALSE | Endothelia Capillary E |
| GCCAGCA/db/db1  | db/db | 3109 | 0.039671 | FALSE | 1.218574 | FALSE | Photoreceptor          |
| GCCAGCA/db/db1  | db/db | 3480 | 0.011081 | FALSE | 1.265547 | FALSE | Photoreceptor          |
| GCCAGCA/db/db1  | db/db | 2621 | 0.037564 | FALSE | 0.835478 | FALSE | Photoreceptor          |
| GCCAGCA/db/db1  | db/db | 3246 | 0.116912 | TRUE  | 4.128142 | FALSE |                        |
| GCCAGCA/db/db1  | db/db | 1928 | 0.024534 | FALSE | 0.603581 | FALSE | Photoreceptor          |
| GCCAGCA/db/db1  | db/db | 1059 | 0.043505 | FALSE | 0.659572 | FALSE | Photoreceptor          |
| GCCAGGT/db/db1  | db/db | 1521 | 0.052669 | FALSE | 1.915264 | FALSE | Photoreceptor          |
| GCCAGGT/db/db1  | db/db | 2379 | 0.008234 | FALSE | 1.106754 | FALSE | Endothelia EC-C4       |
| GCCAGGT/db/db1  | db/db | 627  | 0.098234 | FALSE | 2.03983  | FALSE | Endothelia Capillary E |
| GCCAGGT/db/db1  | db/db | 5569 | 0.051646 | FALSE | 1.020871 | FALSE | Photoreceptor          |
| GCCAGGT/db/db1  | db/db | 1171 | 0.033726 | FALSE | 0.791562 | FALSE | Photoreceptor          |
| GCCAGGT/db/db1  | db/db | 1847 | 0.070386 | FALSE | 1.478364 | FALSE | Photoreceptor          |
| GCCAGGT/db/db1  | db/db | 501  | 0.080645 | FALSE | 17.52717 | TRUE  |                        |
| GCCAGTG/db/db1  | db/db | 2338 | 0.008032 | FALSE | 1.109901 | FALSE | Endothelia Capillary E |
| GCCAGTG/db/db1  | db/db | 1434 | 0.093319 | FALSE | 1.139912 | FALSE | Photoreceptor          |
| GCCAGTG/db/db1  | db/db | 3774 | 0.012052 | FALSE | 1.042955 | FALSE | Photoreceptor          |
| GCCAGTG/db/db1  | db/db | 4059 | 0.038251 | FALSE | 0.832657 | FALSE | Photoreceptor          |
| GCCAGTG/db/db1  | db/db | 798  | 0.00687  | FALSE | 1.486043 | FALSE | Pericyte               |
| GCCAGTG/db/db1  | db/db | 2133 | 0.045165 | FALSE | 0.948647 | FALSE | Endothelia EC-C4       |
| GCCAGTG/db/db1  | db/db | 2544 | 0.052669 | FALSE | 1.255394 | FALSE | Photoreceptor          |
| GCCAGTG/db/db1  | db/db | 758  | 0.041154 | FALSE | 1.971117 | FALSE | Neuron                 |
| GCCAGTG/db/db1  | db/db | 1845 | 0.076994 | FALSE | 1.922833 | FALSE | Photoreceptor          |
| GCCATGG/db/db1  | db/db | 4666 | 0.061912 | FALSE | 0.72377  | FALSE | Endothelia EC-C4       |
| GCCATGG/db/db1  | db/db | 5097 | 0.017114 | FALSE | 0.50848  | FALSE | Photoreceptor          |
| GCCATGG/db/db1  | db/db | 1706 | 0.037564 | FALSE | 1.140892 | FALSE | Endothelia Capillary E |
| GCCATGG/db/db1  | db/db | 997  | 0.012814 | FALSE | 1.427166 | FALSE | Endothelia Capillary E |
| GCCATGG/db/db1  | db/db | 1640 | 0.038251 | FALSE | 1.545506 | FALSE | Neuron                 |
| GCCATGG/db/db1  | db/db | 2684 | 0.018422 | FALSE | 0.994527 | FALSE | Endothelia Capillary E |
| GCCATGG/db/db1  | db/db | 609  | 0.023266 | FALSE | 0.743624 | FALSE | Photoreceptor          |
| GCCATGG/db/db1  | db/db | 884  | 0.049679 | FALSE | 1.436554 | FALSE | Photoreceptor          |
| GCCATGG/db/db1  | db/db | 5541 | 0.017758 | FALSE | 0.447332 | FALSE | Photoreceptor          |
| GCCATGG/db/db1  | db/db | 544  | 0.073582 | FALSE | 9.499358 | TRUE  |                        |
| GCCATGG/db/db1  | db/db | 2560 | 0.011561 | FALSE | 1.219511 | FALSE | Photoreceptor          |
| GCCATGG/db/db1  | db/db | 1697 | 0.055901 | FALSE | 1.211337 | FALSE | Photoreceptor          |
| GCCATGG/db/db1  | db/db | 1012 | 0.138889 | TRUE  | 6.071179 | TRUE  |                        |
| GCCATGG/db/db1  | db/db | 2620 | 0.032546 | FALSE | 0.484336 | FALSE | Photoreceptor          |
| GCCATGG/db/db1  | db/db | 6268 | 0.039671 | FALSE | 0.550364 | FALSE | Photoreceptor          |
| GCCATTCA db/db1 | db/db | 3031 | 0.020171 | FALSE | 1.262795 | FALSE | Endothelia Capillary E |
| GCCATTCA db/db1 | db/db | 775  | 0.023266 | FALSE | 0.512906 | FALSE | Photoreceptor          |
| GCCATTCA db/db1 | db/db | 474  | 0.014151 | FALSE | 2.388849 | FALSE | Endothelia Capillary E |
| GCCATTCC db/db1 | db/db | 925  | 0.017758 | FALSE | 0.690272 | FALSE | Photoreceptor          |
| GCCATTCC db/db1 | db/db | 413  | 0.046906 | FALSE | 29.15493 | TRUE  |                        |
| GCCATTCC db/db1 | db/db | 725  | 0.100845 | TRUE  | 18.44332 | TRUE  |                        |

|                 |       |      |          |       |          |       |                        |
|-----------------|-------|------|----------|-------|----------|-------|------------------------|
| GCCATTCC db/db1 | db/db | 945  | 0.046906 | FALSE | 0.613701 | FALSE | Photoreceptor          |
| GCCATTCC db/db1 | db/db | 2094 | 0.027758 | FALSE | 1.879429 | FALSE | Muller cell            |
| GCCATTCC db/db1 | db/db | 593  | 0.047807 | FALSE | 1.200033 | FALSE | Photoreceptor          |
| GCCATTCT db/db1 | db/db | 4244 | 0.061912 | FALSE | 1.065121 | FALSE | Photoreceptor          |
| GCCATTCT db/db1 | db/db | 737  | 0.008438 | FALSE | 2.067558 | FALSE | Endothelia Capillary E |
| CCCCAGA db/db1  | db/db | 6917 | 0.037564 | FALSE | 0.617588 | FALSE | Photoreceptor          |
| CCCCAGA db/db1  | db/db | 4376 | 0.018761 | FALSE | 0.625444 | FALSE | Photoreceptor          |
| CCCCAGA db/db1  | db/db | 649  | 0.043505 | FALSE | 2.272798 | FALSE | Endothelia Venous EC   |
| CCCCAGA db/db1  | db/db | 7988 | 0.021669 | FALSE | 0.697263 | FALSE | Photoreceptor          |
| CCCCAGA db/db1  | db/db | 5666 | 0.024105 | FALSE | 0.79032  | FALSE | Photoreceptor          |
| CCCCAGA db/db1  | db/db | 1121 | 0.076994 | FALSE | 1.672629 | FALSE | Photoreceptor          |
| CCCCAGA db/db1  | db/db | 3577 | 0.043505 | FALSE | 0.826931 | FALSE | Photoreceptor          |
| CCCCAGA db/db1  | db/db | 2627 | 0.065957 | FALSE | 1.494268 | FALSE | Endothelia Capillary E |
| CCCCAGA db/db1  | db/db | 1724 | 0.080645 | FALSE | 1.302862 | FALSE | Endothelia Capillary E |
| CCCCAGA db/db1  | db/db | 1470 | 0.109795 | TRUE  | 1.234568 | FALSE |                        |
| CCCCAGA db/db1  | db/db | 1334 | 0.014151 | FALSE | 1.358362 | FALSE | Endothelia Capillary E |
| CCCCAGA db/db1  | db/db | 359  | 0.009493 | FALSE | 4.037161 | FALSE | Muller cell            |
| CCCCGAA db/db1  | db/db | 4687 | 0.023266 | FALSE | 0.699698 | FALSE | Endothelia Venous EC   |
| CCCCGAA db/db1  | db/db | 2684 | 0.022857 | FALSE | 0.668184 | FALSE | Photoreceptor          |
| CCCCGAA db/db1  | db/db | 771  | 0.080645 | FALSE | 2.298438 | FALSE | Photoreceptor          |
| CCCCGAA db/db1  | db/db | 799  | 0.080645 | FALSE | 13.0898  | TRUE  |                        |
| CCCCGAA db/db1  | db/db | 515  | 0.014151 | FALSE | 1.117424 | FALSE | Photoreceptor          |
| CCCCGAA db/db1  | db/db | 1323 | 0.042704 | FALSE | 1.347746 | FALSE | Photoreceptor          |
| CCCCGAA db/db1  | db/db | 823  | 0.091004 | FALSE | 1.38855  | FALSE | Photoreceptor          |
| CCCCGAA db/db1  | db/db | 408  | 0.058205 | FALSE | 3.183023 | FALSE | Pericyte               |
| CCCCGAA db/db1  | db/db | 777  | 0.012814 | FALSE | 0.397826 | FALSE | Photoreceptor          |
| CCCCGAA db/db1  | db/db | 579  | 0.027758 | FALSE | 0.753543 | FALSE | Photoreceptor          |
| CCCCGAA db/db1  | db/db | 5865 | 0.025868 | FALSE | 0.907742 | FALSE | Photoreceptor          |
| CCCGATG db/db1  | db/db | 455  | 0.088776 | FALSE | 10.16692 | TRUE  |                        |
| CCCGATG db/db1  | db/db | 5135 | 0.016799 | FALSE | 0.530409 | FALSE | Photoreceptor          |
| CCCGATG db/db1  | db/db | 2614 | 0.018088 | FALSE | 0.955247 | FALSE | Photoreceptor          |
| CCCGATG db/db1  | db/db | 1254 | 0.024971 | FALSE | 1.071179 | FALSE | Photoreceptor          |
| CCCGATG db/db1  | db/db | 786  | 0.012557 | FALSE | 0.895616 | FALSE | Endothelia Capillary E |
| CCCGATG db/db1  | db/db | 3429 | 0.021669 | FALSE | 1.01373  | FALSE | Endothelia Capillary E |
| CCCGTGA db/db1  | db/db | 1564 | 0.009493 | FALSE | 0.84039  | FALSE | Photoreceptor          |
| CCCGTGA db/db1  | db/db | 2420 | 0.067388 | FALSE | 0.966412 | FALSE | Photoreceptor          |
| CCCGTGA db/db1  | db/db | 769  | 0.084562 | FALSE | 2.34561  | FALSE | Photoreceptor          |
| CCCGTGA db/db1  | db/db | 1424 | 0.126958 | TRUE  | 1.203089 | FALSE |                        |
| CCCGTGA db/db1  | db/db | 2850 | 0.021286 | FALSE | 1.18986  | FALSE | Endothelia Capillary E |
| CCCGTGA db/db1  | db/db | 450  | 0.014151 | FALSE | 0.596613 | FALSE | Photoreceptor          |
| GCCTGTTA db/db1 | db/db | 387  | 0.095727 | FALSE | 2.885772 | FALSE | Muller cell            |
| GCCTGTTC db/db1 | db/db | 650  | 0.044326 | FALSE | 0.997952 | FALSE | Photoreceptor          |
| GCCTGTTC db/db1 | db/db | 5099 | 0.034954 | FALSE | 0.941219 | FALSE | Photoreceptor          |
| GCCTGTTC db/db1 | db/db | 9170 | 0.014429 | FALSE | 0.434273 | FALSE | Photoreceptor          |
| GCCTGTTC db/db1 | db/db | 2132 | 0.046906 | FALSE | 0.927828 | FALSE | Photoreceptor          |
| GCCTGTTT db/db1 | db/db | 993  | 0.057037 | FALSE | 0.856952 | FALSE | Photoreceptor          |
| GCGAGAA db/db1  | db/db | 3752 | 0.012052 | FALSE | 0.859881 | FALSE | Endothelia Venous EC   |

|                 |       |      |          |       |          |       |                        |
|-----------------|-------|------|----------|-------|----------|-------|------------------------|
| GCGAGAA db/db1  | db/db | 1336 | 0.082569 | FALSE | 0.70149  | FALSE | Photoreceptor          |
| GCGAGAA db/db1  | db/db | 4124 | 0.016488 | FALSE | 0.93091  | FALSE | Endothelia EC-C4       |
| GCGAGAA db/db1  | db/db | 2467 | 0.076994 | FALSE | 1.723732 | FALSE | Photoreceptor          |
| GCGAGAA db/db1  | db/db | 1074 | 0.135645 | TRUE  | 4.315197 | FALSE |                        |
| GCGAGAA db/db1  | db/db | 600  | 0.00687  | FALSE | 1.95516  | FALSE | Endothelia Capillary E |
| GCGAGAA db/db1  | db/db | 1339 | 0.091004 | FALSE | 2.826722 | FALSE | Muller cell            |
| GCGAGAA db/db1  | db/db | 662  | 0.106411 | TRUE  | 1.185345 | FALSE |                        |
| GCGAGAA db/db1  | db/db | 8577 | 0.008852 | FALSE | 0.535872 | FALSE | Photoreceptor          |
| GCGAGAA db/db1  | db/db | 4714 | 0.042704 | FALSE | 0.68606  | FALSE | Photoreceptor          |
| GCGATCG db/db1  | db/db | 940  | 0.036232 | FALSE | 1.957156 | FALSE | Photoreceptor          |
| GCGATCG db/db1  | db/db | 624  | 0.122388 | TRUE  | 1.152074 | FALSE |                        |
| GCGATCG db/db1  | db/db | 560  | 0.020908 | FALSE | 0.338105 | FALSE | Photoreceptor          |
| GCGATCG db/db1  | db/db | 851  | 0.035586 | FALSE | 0.887228 | FALSE | Photoreceptor          |
| GCGATCG db/db1  | db/db | 6234 | 0.093319 | FALSE | 0.840061 | FALSE | Neuron                 |
| GCGATCG db/db1  | db/db | 1860 | 0.088776 | FALSE | 0.706242 | FALSE | Photoreceptor          |
| GCGGAAA db/db1  | db/db | 6251 | 0.382671 | TRUE  | 1.421095 | FALSE |                        |
| GCGGAAA db/db1  | db/db | 415  | 0.022455 | FALSE | 2.322078 | FALSE | Muller cell            |
| GCGGAAA db/db1  | db/db | 3492 | 0.054795 | FALSE | 0.980826 | FALSE | Photoreceptor          |
| GCGGAAA db/db1  | db/db | 384  | 0.095727 | FALSE | 3.535256 | FALSE | Muller cell            |
| GCGGAAA db/db1  | db/db | 7372 | 0.029787 | FALSE | 0.687778 | FALSE | Photoreceptor          |
| GCGGATC db/db1  | db/db | 961  | 0.063221 | FALSE | 1.826765 | FALSE | Photoreceptor          |
| GCGGATC db/db1  | db/db | 2881 | 0.014997 | FALSE | 0.998181 | FALSE | Photoreceptor          |
| GCGGATC db/db1  | db/db | 4933 | 0.057037 | FALSE | 0.866654 | FALSE | Endothelia Venous EC   |
| GCGGATC db/db1  | db/db | 584  | 0.058205 | FALSE | 2.167529 | FALSE | Endothelia Capillary E |
| GCGGATC db/db1  | db/db | 3401 | 0.052669 | FALSE | 1.187447 | FALSE | Photoreceptor          |
| GCGTGCA db/db1  | db/db | 919  | 0.040404 | FALSE | 1.005622 | FALSE | Photoreceptor          |
| GCGTGCA db/db1  | db/db | 653  | 0.033726 | FALSE | 2.848207 | FALSE | Endothelia Capillary E |
| GCGTGCA db/db1  | db/db | 1126 | 0.014151 | FALSE | 1.377952 | FALSE | Pericyte               |
| GCGTGCA db/db1  | db/db | 6104 | 0.357022 | TRUE  | 2.532558 | FALSE |                        |
| GCGTGCA db/db1  | db/db | 1286 | 0.020908 | FALSE | 1.178727 | FALSE | Photoreceptor          |
| GCGTGCA db/db1  | db/db | 2244 | 0.017758 | FALSE | 1.231969 | FALSE | Endothelia Capillary E |
| GCGTGCA db/db1  | db/db | 427  | 0.034954 | FALSE | 2.050921 | FALSE | Photoreceptor          |
| GCGTGCA db/db1  | db/db | 1068 | 0.080645 | FALSE | 1.882741 | FALSE | Endothelia Venous EC   |
| GCGTGCA db/db1  | db/db | 769  | 0.13452  | TRUE  | 7.692308 | TRUE  |                        |
| GCGTTTCA db/db1 | db/db | 6551 | 0.034334 | FALSE | 0.811626 | FALSE | Photoreceptor          |
| GCGTTTCC db/db1 | db/db | 1652 | 0.08663  | FALSE | 1.40834  | FALSE | Muller cell            |
| GCGTTTCC db/db1 | db/db | 475  | 0.073582 | FALSE | 10.41348 | TRUE  |                        |
| GCGTTTCC db/db1 | db/db | 2354 | 0.017434 | FALSE | 0.94314  | FALSE | Endothelia Venous EC   |
| GCGTTTCC db/db1 | db/db | 4851 | 0.024105 | FALSE | 0.881601 | FALSE | Photoreceptor          |
| GCGTTTCC db/db1 | db/db | 2580 | 0.017114 | FALSE | 0.809496 | FALSE | Photoreceptor          |
| GCGTTTCC db/db1 | db/db | 2071 | 0.080645 | FALSE | 0.99892  | FALSE | Photoreceptor          |
| GCGTTTCT db/db1 | db/db | 682  | 0.036891 | FALSE | 1.339554 | FALSE | Photoreceptor          |
| GCGTTTCT db/db1 | db/db | 7632 | 0.021669 | FALSE | 0.662932 | FALSE | Photoreceptor          |
| GCGTTTCT db/db1 | db/db | 563  | 0.023682 | FALSE | 2.634254 | FALSE | Muller cell            |
| GCGTTTCT db/db1 | db/db | 1551 | 0.024971 | FALSE | 1.05201  | FALSE | Pericyte               |
| GCTACAA db/db1  | db/db | 179  | 0.104679 | TRUE  | 0.391543 | FALSE |                        |
| GCTACAA db/db1  | db/db | 6520 | 0.01981  | FALSE | 0.268564 | FALSE | Photoreceptor          |

|                 |       |      |          |       |          |       |                        |
|-----------------|-------|------|----------|-------|----------|-------|------------------------|
| GCTACAA/ db/db1 | db/db | 7019 | 0.019106 | FALSE | 0.39613  | FALSE | Photoreceptor          |
| GCTACAA/ db/db1 | db/db | 1614 | 0.013074 | FALSE | 1.564671 | FALSE | Endothelia Capillary E |
| GCTACAA/ db/db1 | db/db | 3686 | 0.038953 | FALSE | 0.589454 | FALSE | Photoreceptor          |
| GCTACAA( db/db1 | db/db | 8062 | 0.055901 | FALSE | 0.407916 | FALSE | Photoreceptor          |
| GCTACAA( db/db1 | db/db | 4232 | 0.035586 | FALSE | 0.655738 | FALSE | Photoreceptor          |
| GCTACAA( db/db1 | db/db | 669  | 0.015287 | FALSE | 1.621423 | FALSE | Endothelia Capillary E |
| GCTACAAT db/db1 | db/db | 464  | 0.051646 | FALSE | 8.830022 | TRUE  |                        |
| GCTACAAT db/db1 | db/db | 1506 | 0.064568 | FALSE | 1.428784 | FALSE | Photoreceptor          |
| GCTACAAT db/db1 | db/db | 5409 | 0.036232 | FALSE | 0.867774 | FALSE | Endothelia Venous EC   |
| GCTACCTA db/db1 | db/db | 2175 | 0.098234 | FALSE | 1.192551 | FALSE | Photoreceptor          |
| GCTACCTA db/db1 | db/db | 3641 | 0.029266 | FALSE | 1.133742 | FALSE | Endothelia Venous EC   |
| GCTACCTC db/db1 | db/db | 1821 | 0.024105 | FALSE | 1.06872  | FALSE | Photoreceptor          |
| GCTACCTC db/db1 | db/db | 3068 | 0.021669 | FALSE | 0.630498 | FALSE | Photoreceptor          |
| GCTACCTC db/db1 | db/db | 441  | 0.045165 | FALSE | 1.499955 | FALSE | Photoreceptor          |
| GCTACCTT db/db1 | db/db | 456  | 0.006137 | FALSE | 1.610539 | FALSE | Endothelia Capillary E |
| GCTACCTT db/db1 | db/db | 1539 | 0.014711 | FALSE | 0.941556 | FALSE | Endothelia Capillary E |
| GCTCAAA/ db/db1 | db/db | 481  | 0.075259 | FALSE | 11.5983  | TRUE  |                        |
| GCTCAAA/ db/db1 | db/db | 3566 | 0.021286 | FALSE | 1.140672 | FALSE | Endothelia Capillary E |
| GCTCAAA/ db/db1 | db/db | 3646 | 0.100845 | TRUE  | 1.624178 | FALSE |                        |
| GCTCAAA( db/db1 | db/db | 416  | 0.091004 | FALSE | 3.238755 | FALSE | Muller cell            |
| GCTCAAA( db/db1 | db/db | 972  | 0.073582 | FALSE | 1.271027 | FALSE | Photoreceptor          |
| GCTCAAA( db/db1 | db/db | 1827 | 0.070386 | FALSE | 1.559717 | FALSE | Photoreceptor          |
| GCTCAAA( db/db1 | db/db | 583  | 0.012814 | FALSE | 0.53982  | FALSE | Photoreceptor          |
| GCTCAAA( db/db1 | db/db | 7358 | 0.035586 | FALSE | 0.420665 | FALSE | Photoreceptor          |
| GCTCAAA( db/db1 | db/db | 618  | 0.015581 | FALSE | 1.543401 | FALSE | Endothelia Capillary E |
| GCTCAAAT db/db1 | db/db | 1698 | 0.071958 | FALSE | 1.953663 | FALSE | Muller cell            |
| GCTCAAAT db/db1 | db/db | 3552 | 0.164835 | TRUE  | 3.530911 | FALSE |                        |
| GCTCAAAT db/db1 | db/db | 783  | 0.007833 | FALSE | 2.523409 | FALSE | Photoreceptor          |
| GCTCAAAT db/db1 | db/db | 2440 | 0.012814 | FALSE | 0.853091 | FALSE | Endothelia Venous EC   |
| GCTGAAT( db/db1 | db/db | 5779 | 0.018422 | FALSE | 0.69791  | FALSE | Photoreceptor          |
| GCTGAAT( db/db1 | db/db | 3147 | 0.008852 | FALSE | 0.866746 | FALSE | Endothelia EC-C4       |
| GCTGAAT( db/db1 | db/db | 528  | 0.070386 | FALSE | 6.620689 | TRUE  |                        |
| GCTGAAT( db/db1 | db/db | 4100 | 0.026328 | FALSE | 0.954454 | FALSE | Photoreceptor          |
| GCTGAAT( db/db1 | db/db | 1035 | 0.045165 | FALSE | 1.498124 | FALSE | Photoreceptor          |
| GCTGAAT( db/db1 | db/db | 411  | 0.011561 | FALSE | 0.933317 | FALSE | Photoreceptor          |
| GCTGAATT db/db1 | db/db | 438  | 0.039671 | FALSE | 2.038049 | FALSE | Pericyte               |
| GCTGAATT db/db1 | db/db | 8051 | 0.048732 | FALSE | 0.530715 | FALSE | Photoreceptor          |
| GCTGCAG/ db/db1 | db/db | 1921 | 0.093319 | FALSE | 1.328711 | FALSE | Photoreceptor          |
| GCTGCAG/ db/db1 | db/db | 1948 | 0.034954 | FALSE | 1.232341 | FALSE | Photoreceptor          |
| GCTGCAG/ db/db1 | db/db | 2177 | 0.013605 | FALSE | 0.966604 | FALSE | Endothelia Capillary E |
| GCTGCAG/ db/db1 | db/db | 7290 | 0.021669 | FALSE | 0.370011 | FALSE | Photoreceptor          |
| GCTGCAG( db/db1 | db/db | 1031 | 0.039671 | FALSE | 2.214784 | FALSE | Muller cell            |
| GCTGCAG( db/db1 | db/db | 1928 | 0.006683 | FALSE | 1.091076 | FALSE | Endothelia EC-C4       |
| GCTGCAG( db/db1 | db/db | 821  | 0.018422 | FALSE | 0.743536 | FALSE | Photoreceptor          |
| GCTGCAG( db/db1 | db/db | 4779 | 0.334395 | TRUE  | 0.811585 | FALSE |                        |
| GCTGCAG  db/db1 | db/db | 729  | 0.061912 | FALSE | 2.600621 | FALSE | Photoreceptor          |
| GCTGCAG  db/db1 | db/db | 652  | 0.018088 | FALSE | 1.967358 | FALSE | Endothelia Capillary E |

|                 |       |      |          |       |          |       |                        |
|-----------------|-------|------|----------|-------|----------|-------|------------------------|
| GCTGCAGT db/db1 | db/db | 6859 | 0.020908 | FALSE | 0.75104  | FALSE | Photoreceptor          |
| GCTGGGT db/db1  | db/db | 4351 | 0.063221 | FALSE | 0.914844 | FALSE | Endothelia EC-C4       |
| GCTGGGT db/db1  | db/db | 1097 | 0.048732 | FALSE | 1.378096 | FALSE | Endothelia Capillary E |
| GCTGGGT db/db1  | db/db | 2652 | 0.095727 | FALSE | 1.19729  | FALSE | Photoreceptor          |
| GCTGGGT db/db1  | db/db | 1471 | 0.148319 | TRUE  | 2.295661 | FALSE |                        |
| GCTGGGT db/db1  | db/db | 3312 | 0.065957 | FALSE | 1.087439 | FALSE | Photoreceptor          |
| GCTGGGT db/db1  | db/db | 413  | 0.045165 | FALSE | 3.407307 | FALSE | Endothelia EC-C4       |
| GCTGGGT db/db1  | db/db | 936  | 0.044326 | FALSE | 2.118273 | FALSE | Muller cell            |
| GCTGGGT db/db1  | db/db | 3051 | 0.038251 | FALSE | 0.628139 | FALSE | Photoreceptor          |
| GCTGGGT db/db1  | db/db | 1144 | 0.064568 | FALSE | 1.103542 | FALSE | Photoreceptor          |
| GCTGGGT db/db1  | db/db | 756  | 0.038953 | FALSE | 1.973341 | FALSE | Photoreceptor          |
| GCTGGGT db/db1  | db/db | 1205 | 0.028251 | FALSE | 1.493936 | FALSE | Endothelia Capillary E |
| GCTGGGT db/db1  | db/db | 508  | 0.006683 | FALSE | 2.239576 | FALSE | Endothelia Capillary E |
| GCTGGGT db/db1  | db/db | 5241 | 0.022857 | FALSE | 0.756628 | FALSE | Photoreceptor          |
| GCTGGGT db/db1  | db/db | 1223 | 0.043505 | FALSE | 1.307233 | FALSE | Photoreceptor          |
| GCTTCACC db/db1 | db/db | 3724 | 0.034954 | FALSE | 1.046641 | FALSE | Photoreceptor          |
| GCTTCACC db/db1 | db/db | 515  | 0.114406 | TRUE  | 3.221809 | FALSE |                        |
| GCTTCACC db/db1 | db/db | 379  | 0.093319 | FALSE | 3.587915 | FALSE | Microglia              |
| GCTTCACC db/db1 | db/db | 1733 | 0.030859 | FALSE | 0.843893 | FALSE | Photoreceptor          |
| GCTTCACC db/db1 | db/db | 2924 | 0.071958 | FALSE | 0.929979 | FALSE | Photoreceptor          |
| GCTTCACC db/db1 | db/db | 3099 | 0.015879 | FALSE | 0.388427 | FALSE | Photoreceptor          |
| GCTTCACT db/db1 | db/db | 919  | 0.048732 | FALSE | 1.487412 | FALSE | Photoreceptor          |
| GCTTCACT db/db1 | db/db | 2064 | 0.024534 | FALSE | 1.226905 | FALSE | Endothelia Venous EC   |
| GCTTCACT db/db1 | db/db | 2958 | 0.026328 | FALSE | 1.107444 | FALSE | Endothelia Capillary E |
| GCTTGGG db/db1  | db/db | 771  | 0.039671 | FALSE | 1.127062 | FALSE | Photoreceptor          |
| GCTTGGG db/db1  | db/db | 4383 | 0.034954 | FALSE | 0.859972 | FALSE | Endothelia Venous EC   |
| GCTTGGG db/db1  | db/db | 1479 | 0.065957 | FALSE | 0.865695 | FALSE | Photoreceptor          |
| GCTTGGG db/db1  | db/db | 927  | 0.05065  | FALSE | 1.70345  | FALSE | Endothelia Capillary E |
| GCTTGGG db/db1  | db/db | 1885 | 0.014997 | FALSE | 1.064115 | FALSE | Photoreceptor          |
| GCTTTCGA db/db1 | db/db | 3292 | 0.135645 | TRUE  | 2.282158 | FALSE |                        |
| GCTTTCGA db/db1 | db/db | 421  | 0.026796 | FALSE | 2.209269 | FALSE | Endothelia Capillary E |
| GCTTTCGA db/db1 | db/db | 1331 | 0.112477 | TRUE  | 7.539854 | TRUE  |                        |
| GCTTTCGA db/db1 | db/db | 2826 | 0.03313  | FALSE | 0.901937 | FALSE | Photoreceptor          |
| GCTTTCGC db/db1 | db/db | 2664 | 0.028251 | FALSE | 0.956367 | FALSE | Endothelia Capillary E |
| GCTTTCGC db/db1 | db/db | 1415 | 0.018761 | FALSE | 1.146547 | FALSE | Endothelia Capillary E |
| GCTTTCGC db/db1 | db/db | 2747 | 0.021669 | FALSE | 0.870169 | FALSE | Endothelia Venous EC   |
| GCTTTCGC db/db1 | db/db | 3563 | 0.100845 | TRUE  | 1.92413  | FALSE |                        |
| GCTTTCGC db/db1 | db/db | 1179 | 0.058205 | FALSE | 1.373404 | FALSE | Photoreceptor          |
| GCTTTCGT db/db1 | db/db | 963  | 0.098234 | FALSE | 2.951084 | FALSE | Muller cell            |
| GGAACCC db/db1  | db/db | 3919 | 0.027758 | FALSE | 1.489368 | FALSE | Photoreceptor          |
| GGAACCC db/db1  | db/db | 799  | 0.084562 | FALSE | 1.327756 | FALSE | Photoreceptor          |
| GGAACCC db/db1  | db/db | 1389 | 0.095727 | FALSE | 1.070938 | FALSE | Photoreceptor          |
| GGAACCC db/db1  | db/db | 873  | 0.043505 | FALSE | 1.600978 | FALSE | Photoreceptor          |
| GGAACCC db/db1  | db/db | 1968 | 0.038953 | FALSE | 1.246512 | FALSE | Endothelia Capillary E |
| GGAACCC db/db1  | db/db | 790  | 0.027273 | FALSE | 1.94294  | FALSE | Endothelia EC-C4       |
| GGAACCC db/db1  | db/db | 1523 | 0.021669 | FALSE | 1.087071 | FALSE | Endothelia Capillary E |
| GGAACCC db/db1  | db/db | 7285 | 0.020536 | FALSE | 0.526593 | FALSE | Photoreceptor          |

|         |        |       |      |          |       |          |       |                        |
|---------|--------|-------|------|----------|-------|----------|-------|------------------------|
| GGAACCC | db/db1 | db/db | 610  | 0.038953 | FALSE | 0.359923 | FALSE | Photoreceptor          |
| GGAACCC | db/db1 | db/db | 559  | 0.044326 | FALSE | 1.335717 | FALSE | Photoreceptor          |
| GGAACCC | db/db1 | db/db | 1269 | 0.012814 | FALSE | 1.296634 | FALSE | Endothelia Capillary E |
| GGAAGTG | db/db1 | db/db | 1530 | 0.029787 | FALSE | 1.538382 | FALSE | Endothelia EC-C4       |
| GGAAGTG | db/db1 | db/db | 1854 | 0.126437 | TRUE  | 4.388512 | FALSE |                        |
| GGAAGTG | db/db1 | db/db | 3544 | 0.024105 | FALSE | 1.311417 | FALSE | Photoreceptor          |
| GGAAGTG | db/db1 | db/db | 1782 | 0.051646 | FALSE | 1.02223  | FALSE | Endothelia EC-C4       |
| GGAATCT | db/db1 | db/db | 961  | 0.112037 | TRUE  | 0.771389 | FALSE |                        |
| GGAATCT | db/db1 | db/db | 388  | 0.031973 | FALSE | 3.435379 | FALSE | Photoreceptor          |
| GGAATCT | db/db1 | db/db | 7078 | 0.031411 | FALSE | 0.752399 | FALSE | Photoreceptor          |
| GGAATCT | db/db1 | db/db | 1354 | 0.019455 | FALSE | 0.418352 | FALSE | Photoreceptor          |
| GGAATCT | db/db1 | db/db | 1269 | 0.057037 | FALSE | 1.46225  | FALSE | Endothelia Capillary E |
| GGAATCT | db/db1 | db/db | 502  | 0.08663  | FALSE | 0.998554 | FALSE | Photoreceptor          |
| GGAATCT | db/db1 | db/db | 2532 | 0.024534 | FALSE | 1.336071 | FALSE | Endothelia Capillary E |
| GGAATCT | db/db1 | db/db | 1213 | 0.014429 | FALSE | 2.174047 | FALSE | Muller cell            |
| GGAATCT | db/db1 | db/db | 5703 | 0.020171 | FALSE | 0.629583 | FALSE | Photoreceptor          |
| GGAATCT | db/db1 | db/db | 448  | 0.068864 | FALSE | 15.46875 | TRUE  |                        |
| GGAATCT | db/db1 | db/db | 3279 | 0.130259 | TRUE  | 2.898551 | FALSE |                        |
| GGAATCT | db/db1 | db/db | 621  | 0.041154 | FALSE | 1.025979 | FALSE | Photoreceptor          |
| GGAATGG | db/db1 | db/db | 1306 | 0.023266 | FALSE | 1.396218 | FALSE | Endothelia Capillary E |
| GGAATGG | db/db1 | db/db | 2914 | 0.016799 | FALSE | 0.653148 | FALSE | Photoreceptor          |
| GGAATGG | db/db1 | db/db | 3111 | 0.011561 | FALSE | 0.915514 | FALSE | Endothelia Venous EC   |
| GGAATGG | db/db1 | db/db | 580  | 0.012557 | FALSE | 0.495308 | FALSE | Photoreceptor          |
| GGAATGG | db/db1 | db/db | 4350 | 0.029266 | FALSE | 1.002012 | FALSE | Photoreceptor          |
| GGAATGG | db/db1 | db/db | 2048 | 0.035586 | FALSE | 1.263669 | FALSE | Photoreceptor          |
| GGAATGG | db/db1 | db/db | 3301 | 0.022857 | FALSE | 0.906063 | FALSE | Endothelia EC-C4       |
| GGAATGG | db/db1 | db/db | 598  | 0.025416 | FALSE | 2.474098 | FALSE | Endothelia Capillary E |
| GGACGTC | db/db1 | db/db | 5806 | 0.019106 | FALSE | 0.673534 | FALSE | Photoreceptor          |
| GGACGTC | db/db1 | db/db | 2577 | 0.020171 | FALSE | 1.101223 | FALSE | Endothelia Capillary E |
| GGACGTC | db/db1 | db/db | 7323 | 0.036891 | FALSE | 0.573617 | FALSE | Photoreceptor          |
| GGACGTC | db/db1 | db/db | 897  | 0.061912 | FALSE | 7.323751 | TRUE  |                        |
| GGACGTC | db/db1 | db/db | 1115 | 0.036232 | FALSE | 1.790186 | FALSE | Endothelia Capillary E |
| GGACGTC | db/db1 | db/db | 1738 | 0.107669 | TRUE  | 2.279793 | FALSE |                        |
| GGACGTC | db/db1 | db/db | 1771 | 0.148377 | TRUE  | 6.781678 | TRUE  |                        |
| GGAGAAC | db/db1 | db/db | 2705 | 0.022455 | FALSE | 0.346517 | FALSE | Photoreceptor          |
| GGAGAAC | db/db1 | db/db | 5525 | 0.080645 | FALSE | 0.768766 | FALSE | Photoreceptor          |
| GGAGAAC | db/db1 | db/db | 1305 | 0.018088 | FALSE | 1.058641 | FALSE | Endothelia Capillary E |
| GGAGAAC | db/db1 | db/db | 457  | 0.021669 | FALSE | 1.291617 | FALSE | Neuron                 |
| GGAGAAC | db/db1 | db/db | 2708 | 0.029787 | FALSE | 0.536764 | FALSE | Photoreceptor          |
| GGAGAAC | db/db1 | db/db | 1232 | 0.104679 | TRUE  | 3.017005 | FALSE |                        |
| GGAGATG | db/db1 | db/db | 5634 | 0.058205 | FALSE | 0.78105  | FALSE | Photoreceptor          |
| GGAGATG | db/db1 | db/db | 960  | 0.070386 | FALSE | 11.11111 | TRUE  |                        |
| GGAGATG | db/db1 | db/db | 932  | 0.027273 | FALSE | 0.839694 | FALSE | Photoreceptor          |
| GGAGATG | db/db1 | db/db | 414  | 0.059406 | FALSE | 4.160134 | FALSE | Photoreceptor          |
| GGAGATG | db/db1 | db/db | 750  | 0.098234 | FALSE | 2.002413 | FALSE | Photoreceptor          |
| GGAGATG | db/db1 | db/db | 3124 | 0.296296 | TRUE  | 2.358903 | FALSE |                        |
| GGAGATG | db/db1 | db/db | 7669 | 0.022455 | FALSE | 0.439941 | FALSE | Photoreceptor          |

|         |        |       |      |          |       |          |       |                        |
|---------|--------|-------|------|----------|-------|----------|-------|------------------------|
| GGAGATG | db/db1 | db/db | 2356 | 0.018422 | FALSE | 0.915212 | FALSE | Endothelia Venous EC   |
| GGAGATG | db/db1 | db/db | 4967 | 0.445833 | TRUE  | 1.740688 | FALSE |                        |
| GGAGATG | db/db1 | db/db | 866  | 0.012557 | FALSE | 2.008094 | FALSE | Endothelia Aterial EC  |
| GGAGCAA | db/db1 | db/db | 650  | 0.01981  | FALSE | 0.537297 | FALSE | Photoreceptor          |
| GGAGCAA | db/db1 | db/db | 605  | 0.046025 | FALSE | 1.249094 | FALSE | Photoreceptor          |
| GGAGCAA | db/db1 | db/db | 2486 | 0.068864 | FALSE | 1.18049  | FALSE | Endothelia EC-C4       |
| GGAGCAA | db/db1 | db/db | 185  | 0.048732 | FALSE | 5.375    | TRUE  |                        |
| GGAGCAA | db/db1 | db/db | 1276 | 0.010614 | FALSE | 1.189018 | FALSE | Endothelia Capillary E |
| GGAGCAA | db/db1 | db/db | 5769 | 0.030859 | FALSE | 0.573285 | FALSE | Photoreceptor          |
| GGAGCAA | db/db1 | db/db | 1047 | 0.018422 | FALSE | 1.089057 | FALSE | Endothelia EC-C4       |
| GGAGGAT | db/db1 | db/db | 4919 | 0.020536 | FALSE | 0.717165 | FALSE | Photoreceptor          |
| GGAGGAT | db/db1 | db/db | 3982 | 0.016488 | FALSE | 0.357971 | FALSE | Photoreceptor          |
| GGAGGAT | db/db1 | db/db | 6497 | 0.013605 | FALSE | 0.555902 | FALSE | Photoreceptor          |
| GGAGGAT | db/db1 | db/db | 4489 | 0.035586 | FALSE | 0.897551 | FALSE | Endothelia Venous EC   |
| GGAGGAT | db/db1 | db/db | 2527 | 0.012303 | FALSE | 1.014332 | FALSE | Photoreceptor          |
| GGAGGAT | db/db1 | db/db | 859  | 0.016181 | FALSE | 2.265788 | FALSE | Photoreceptor          |
| GGAGGAT | db/db1 | db/db | 2479 | 0.049679 | FALSE | 0.91494  | FALSE | Photoreceptor          |
| GGAGGAT | db/db1 | db/db | 908  | 0.009277 | FALSE | 2.090888 | FALSE | Endothelia Capillary E |
| GGAGGAT | db/db1 | db/db | 958  | 0.033726 | FALSE | 1.286641 | FALSE | Muller cell            |
| GGAGGTA | db/db1 | db/db | 776  | 0.044326 | FALSE | 1.9897   | FALSE | Photoreceptor          |
| GGAGGTA | db/db1 | db/db | 988  | 0.061912 | FALSE | 7.576747 | TRUE  |                        |
| GGAGGTA | db/db1 | db/db | 2561 | 0.019106 | FALSE | 0.962615 | FALSE | Endothelia Venous EC   |
| GGAGGTA | db/db1 | db/db | 1400 | 0.078788 | FALSE | 2.069234 | FALSE | Muller cell            |
| GGAGGTA | db/db1 | db/db | 531  | 0.052669 | FALSE | 1.516104 | FALSE | Photoreceptor          |
| GGAGGTA | db/db1 | db/db | 2876 | 0.018761 | FALSE | 1.259884 | FALSE | Endothelia Venous EC   |
| GGAGGTA | db/db1 | db/db | 1725 | 0.011081 | FALSE | 0.570297 | FALSE | Endothelia Venous EC   |
| GGAGGTA | db/db1 | db/db | 6043 | 0.071958 | FALSE | 0.726183 | FALSE | Photoreceptor          |
| GGAGGTA | db/db1 | db/db | 602  | 0.060641 | FALSE | 1.20114  | FALSE | Photoreceptor          |
| GGAGGTA | db/db1 | db/db | 1031 | 0.070386 | FALSE | 1.740736 | FALSE | Photoreceptor          |
| GGATCTA | db/db1 | db/db | 1158 | 0.10565  | TRUE  | 2.337514 | FALSE |                        |
| GGATCTA | db/db1 | db/db | 1401 | 0.016488 | FALSE | 1.274771 | FALSE | Endothelia EC-C4       |
| GGATCTA | db/db1 | db/db | 1894 | 0.022455 | FALSE | 1.052107 | FALSE | Endothelia Capillary E |
| GGATCTA | db/db1 | db/db | 488  | 0.04192  | FALSE | 2.086986 | FALSE | Pericyte               |
| GGATCTA | db/db1 | db/db | 740  | 0.059406 | FALSE | 1.619144 | FALSE | Photoreceptor          |
| GGATCTA | db/db1 | db/db | 2404 | 0.020536 | FALSE | 1.159302 | FALSE | Endothelia Capillary E |
| GGATCTA | db/db1 | db/db | 1304 | 0.007441 | FALSE | 0.844658 | FALSE | Endothelia EC-C4       |
| GGATCTA | db/db1 | db/db | 1590 | 0.04192  | FALSE | 2.488941 | FALSE | Photoreceptor          |
| GGATCTA | db/db1 | db/db | 1254 | 0.084562 | FALSE | 1.557808 | FALSE | Endothelia Capillary E |
| GGATCTA | db/db1 | db/db | 1297 | 0.031973 | FALSE | 1.258814 | FALSE | Endothelia Capillary E |
| GGATGTT | db/db1 | db/db | 6864 | 0.016799 | FALSE | 0.7078   | FALSE | Photoreceptor          |
| GGATGTT | db/db1 | db/db | 5536 | 0.022059 | FALSE | 0.745068 | FALSE | Endothelia EC-C4       |
| GGATGTT | db/db1 | db/db | 884  | 0.065957 | FALSE | 1.417932 | FALSE | Photoreceptor          |
| GGATGTT | db/db1 | db/db | 656  | 0.057037 | FALSE | 1.468983 | FALSE | Photoreceptor          |
| GGATGTT | db/db1 | db/db | 583  | 0.080645 | FALSE | 10.46358 | TRUE  |                        |
| GGATGTT | db/db1 | db/db | 3412 | 0.029787 | FALSE | 0.982354 | FALSE | Endothelia Venous EC   |
| GGATGTT | db/db1 | db/db | 5322 | 0.115723 | TRUE  | 4.565993 | FALSE |                        |
| GGCACGT | db/db1 | db/db | 1381 | 0.013338 | FALSE | 1.373152 | FALSE | Endothelia Capillary E |



|                 |       |      |          |       |          |       |                        |
|-----------------|-------|------|----------|-------|----------|-------|------------------------|
| GGCACGT(db/db1  | db/db | 1805 | 0.027273 | FALSE | 0.494583 | FALSE | Photoreceptor          |
| GGCACGT(db/db1  | db/db | 461  | 0.078788 | FALSE | 1.309528 | FALSE | Pericyte               |
| GGCACGT(db/db1  | db/db | 915  | 0.017114 | FALSE | 1.604092 | FALSE | Endothelia Capillary E |
| GGCACGT(db/db1  | db/db | 438  | 0.025868 | FALSE | 1.735911 | FALSE | Endothelia Capillary E |
| GGCACGT db/db1  | db/db | 3856 | 0.023682 | FALSE | 0.992459 | FALSE | Endothelia Venous EC   |
| GGCACGT db/db1  | db/db | 472  | 0.054795 | FALSE | 2.002172 | FALSE | Photoreceptor          |
| GGCAGTC db/db1  | db/db | 388  | 0.018422 | FALSE | 3.433799 | FALSE | Muller cell            |
| GGCAGTC(db/db1  | db/db | 1642 | 0.028251 | FALSE | 1.508602 | FALSE | Neuron                 |
| GGCAGTC(db/db1  | db/db | 1487 | 0.025868 | FALSE | 1.202391 | FALSE | Endothelia Capillary E |
| GGCAGTC db/db1  | db/db | 1240 | 0.013605 | FALSE | 1.641011 | FALSE | Endothelia Capillary E |
| GGCAGTC db/db1  | db/db | 464  | 0.010614 | FALSE | 2.68554  | FALSE | Endothelia Capillary E |
| GGCGTCA db/db1  | db/db | 3456 | 0.048732 | FALSE | 0.968097 | FALSE | Endothelia Venous EC   |
| GGCGTCA db/db1  | db/db | 1550 | 0.026328 | FALSE | 1.352623 | FALSE | Endothelia EC-C4       |
| GGCGTCA db/db1  | db/db | 3512 | 0.043505 | FALSE | 0.564341 | FALSE | Photoreceptor          |
| GGCGTCA db/db1  | db/db | 3127 | 0.038953 | FALSE | 0.799962 | FALSE | Photoreceptor          |
| GGCGTCA(db/db1  | db/db | 2437 | 0.028251 | FALSE | 0.829285 | FALSE | Endothelia EC-C4       |
| GGCGTCA(db/db1  | db/db | 2701 | 0.192271 | TRUE  | 2.105101 | FALSE |                        |
| GGCGTCA(db/db1  | db/db | 2528 | 0.03313  | FALSE | 1.193031 | FALSE | Endothelia Capillary E |
| GGCGTCA db/db1  | db/db | 593  | 0.060641 | FALSE | 4.357996 | FALSE | Muller cell            |
| GGCGTCA db/db1  | db/db | 961  | 0.048732 | FALSE | 1.389568 | FALSE | Photoreceptor          |
| GGCTGTG db/db1  | db/db | 485  | 0.109375 | TRUE  | 12.74788 | TRUE  |                        |
| GGCTGTG(db/db1  | db/db | 3956 | 0.016488 | FALSE | 1.150282 | FALSE | Endothelia Venous EC   |
| GGCTGTG db/db1  | db/db | 1603 | 0.018088 | FALSE | 1.128161 | FALSE | Endothelia Capillary E |
| GGCTTGG db/db1  | db/db | 5440 | 0.022857 | FALSE | 0.767688 | FALSE | Photoreceptor          |
| GGCTTGG db/db1  | db/db | 812  | 0.038953 | FALSE | 0.615721 | FALSE | Photoreceptor          |
| GGCTTGG db/db1  | db/db | 2061 | 0.046906 | FALSE | 1.099254 | FALSE | Photoreceptor          |
| GGCTTGG(db/db1  | db/db | 6687 | 0.022059 | FALSE | 0.715214 | FALSE | Photoreceptor          |
| GGCTTGG(db/db1  | db/db | 3771 | 0.029266 | FALSE | 0.840297 | FALSE | Endothelia Venous EC   |
| GGCTTGG(db/db1  | db/db | 623  | 0.103732 | TRUE  | 0.258116 | FALSE |                        |
| GGCTTGG db/db1  | db/db | 1145 | 0.014997 | FALSE | 1.226808 | FALSE | Endothelia Capillary E |
| GGCTTGG db/db1  | db/db | 701  | 0.030318 | FALSE | 1.214212 | FALSE | Photoreceptor          |
| GGCTTGG db/db1  | db/db | 7076 | 0.022455 | FALSE | 0.494857 | FALSE | Photoreceptor          |
| GGCTTTCC db/db1 | db/db | 424  | 0.091004 | FALSE | 1.842292 | FALSE | Photoreceptor          |
| GGCTTTCC db/db1 | db/db | 5101 | 0.029787 | FALSE | 0.562252 | FALSE | Photoreceptor          |
| GGCTTTCC db/db1 | db/db | 969  | 0.05065  | FALSE | 1.166957 | FALSE | Photoreceptor          |
| GGCTTTCC db/db1 | db/db | 808  | 0.078788 | FALSE | 0.637239 | FALSE | Photoreceptor          |
| GGCTTTCC db/db1 | db/db | 864  | 0.007441 | FALSE | 1.87268  | FALSE | Pericyte               |
| GGCTTTCT db/db1 | db/db | 947  | 0.068864 | FALSE | 2.593915 | FALSE | Photoreceptor          |
| GGCTTTCT db/db1 | db/db | 691  | 0.080645 | FALSE | 3.879489 | FALSE | Endothelia Capillary E |
| GGCTTTCT db/db1 | db/db | 463  | 0.082569 | FALSE | 6.564885 | TRUE  |                        |
| GGCTTTCT db/db1 | db/db | 1813 | 0.014429 | FALSE | 0.959474 | FALSE | Pericyte               |
| GGGAAGT db/db1  | db/db | 4897 | 0.05065  | FALSE | 0.922284 | FALSE | Photoreceptor          |
| GGGAAGT db/db1  | db/db | 6365 | 0.020536 | FALSE | 0.490621 | FALSE | Photoreceptor          |
| GGGAAGT db/db1  | db/db | 1342 | 0.033726 | FALSE | 2.740594 | FALSE | Muller cell            |
| GGGAAGT db/db1  | db/db | 1185 | 0.021286 | FALSE | 1.654957 | FALSE | Endothelia Capillary E |
| GGGAAGT db/db1  | db/db | 1310 | 0.047807 | FALSE | 1.120989 | FALSE | Pericyte               |
| GGGAAGT db/db1  | db/db | 963  | 0.006317 | FALSE | 1.484206 | FALSE | Pericyte               |

|                |       |      |          |       |          |       |                        |
|----------------|-------|------|----------|-------|----------|-------|------------------------|
| GGGAAGT db/db1 | db/db | 5060 | 0.022857 | FALSE | 0.759651 | FALSE | Photoreceptor          |
| GGGAAGT db/db1 | db/db | 6805 | 0.334395 | TRUE  | 1.038122 | FALSE |                        |
| GGGAAGT db/db1 | db/db | 739  | 0.076994 | FALSE | 2.214188 | FALSE | Endothelia Capillary E |
| GGGACAA db/db1 | db/db | 1774 | 0.016488 | FALSE | 1.170168 | FALSE | Endothelia Aterial EC  |
| GGGACAA db/db1 | db/db | 1071 | 0.004275 | FALSE | 1.123909 | FALSE | Pericyte               |
| GGGACAA db/db1 | db/db | 800  | 0.033726 | FALSE | 1.906917 | FALSE | Photoreceptor          |
| GGGACAA db/db1 | db/db | 1199 | 0.057037 | FALSE | 2.350422 | FALSE | Photoreceptor          |
| GGGACAA db/db1 | db/db | 769  | 0.028754 | FALSE | 1.458037 | FALSE | Photoreceptor          |
| GGGACAA db/db1 | db/db | 1418 | 0.076994 | FALSE | 1.458446 | FALSE | Photoreceptor          |
| GGGACAA db/db1 | db/db | 3509 | 0.051646 | FALSE | 0.926695 | FALSE | Endothelia Venous EC   |
| GGGACAA db/db1 | db/db | 800  | 0.063221 | FALSE | 0.729021 | FALSE | Photoreceptor          |
| GGGACAA db/db1 | db/db | 1220 | 0.053718 | FALSE | 1.315685 | FALSE | Photoreceptor          |
| GGGACAA db/db1 | db/db | 6502 | 0.021669 | FALSE | 0.887115 | FALSE | Photoreceptor          |
| GGGACCT db/db1 | db/db | 1057 | 0.076994 | FALSE | 1.857004 | FALSE | Photoreceptor          |
| GGGACCT db/db1 | db/db | 504  | 0.076994 | FALSE | 3.146072 | FALSE | Muller cell            |
| GGGACCT db/db1 | db/db | 3425 | 0.020171 | FALSE | 1.098784 | FALSE | Endothelia Venous EC   |
| GGGACCT db/db1 | db/db | 2275 | 0.020908 | FALSE | 0.506183 | FALSE | Photoreceptor          |
| GGGACCT db/db1 | db/db | 549  | 0.019455 | FALSE | 3.163907 | FALSE | Endothelia Capillary E |
| GGGACCT db/db1 | db/db | 566  | 0.054795 | FALSE | 1.280126 | FALSE | Photoreceptor          |
| GGGACCT db/db1 | db/db | 3886 | 0.055901 | FALSE | 1.002303 | FALSE | Endothelia Venous EC   |
| GGGACCT db/db1 | db/db | 1515 | 0.012303 | FALSE | 1.18265  | FALSE | Endothelia Capillary E |
| GGGACCT db/db1 | db/db | 786  | 0.054795 | FALSE | 1.668868 | FALSE | Photoreceptor          |
| GGGACCT db/db1 | db/db | 4107 | 0.016181 | FALSE | 0.547143 | FALSE | Photoreceptor          |
| GGGACTC db/db1 | db/db | 394  | 0.016181 | FALSE | 3.459138 | FALSE | Photoreceptor          |
| GGGACTC db/db1 | db/db | 4434 | 0.021669 | FALSE | 0.866403 | FALSE | Photoreceptor          |
| GGGACTC db/db1 | db/db | 2994 | 0.075259 | FALSE | 1.208479 | FALSE | Photoreceptor          |
| GGGACTC db/db1 | db/db | 3885 | 0.020536 | FALSE | 1.192131 | FALSE | Photoreceptor          |
| GGGACTC db/db1 | db/db | 2816 | 0.01981  | FALSE | 1.189304 | FALSE | Photoreceptor          |
| GGGACTC db/db1 | db/db | 1223 | 0.025868 | FALSE | 0.814554 | FALSE | Photoreceptor          |
| GGGAGAT db/db1 | db/db | 541  | 0.018088 | FALSE | 2.392055 | FALSE | Endothelia Capillary E |
| GGGAGAT db/db1 | db/db | 1089 | 0.067388 | FALSE | 1.224541 | FALSE | Photoreceptor          |
| GGGAGAT db/db1 | db/db | 434  | 0.023266 | FALSE | 0.440965 | FALSE | Photoreceptor          |
| GGGAGAT db/db1 | db/db | 1063 | 0.08663  | FALSE | 1.966941 | FALSE | Muller cell            |
| GGGAGAT db/db1 | db/db | 1614 | 0.036891 | FALSE | 1.082563 | FALSE | Photoreceptor          |
| GGGAGAT db/db1 | db/db | 978  | 0.070386 | FALSE | 1.684649 | FALSE | Photoreceptor          |
| GGGAGAT db/db1 | db/db | 2242 | 0.014711 | FALSE | 0.890863 | FALSE | Endothelia EC-C4       |
| GGGAGAT db/db1 | db/db | 5454 | 0.016799 | FALSE | 0.495264 | FALSE | Photoreceptor          |
| GGGAGAT db/db1 | db/db | 809  | 0.030318 | FALSE | 1.760596 | FALSE | Muller cell            |
| GGGAGAT db/db1 | db/db | 823  | 0.031973 | FALSE | 1.947388 | FALSE | Endothelia Capillary E |
| GGGAGTA db/db1 | db/db | 658  | 0.104679 | TRUE  | 3.289474 | FALSE |                        |
| GGGAGTA db/db1 | db/db | 1876 | 0.021286 | FALSE | 1.042569 | FALSE | Photoreceptor          |
| GGGAGTA db/db1 | db/db | 4093 | 0.023266 | FALSE | 0.825854 | FALSE | Photoreceptor          |
| GGGAGTA db/db1 | db/db | 3666 | 0.04192  | FALSE | 1.046058 | FALSE | Photoreceptor          |
| GGGAGTA db/db1 | db/db | 1019 | 0.007636 | FALSE | 1.590804 | FALSE | Endothelia Capillary E |
| GGGATCC db/db1 | db/db | 1385 | 0.051646 | FALSE | 0.900908 | FALSE | Photoreceptor          |
| GGGATCC db/db1 | db/db | 4332 | 0.029266 | FALSE | 0.693295 | FALSE | Photoreceptor          |
| GGGATCC db/db1 | db/db | 1782 | 0.020908 | FALSE | 1.081299 | FALSE | Endothelia EC-C4       |

|         |        |       |      |          |       |          |       |                         |
|---------|--------|-------|------|----------|-------|----------|-------|-------------------------|
| GGGATCC | db/db1 | db/db | 3538 | 0.119124 | TRUE  | 3.694779 | FALSE |                         |
| GGGATGA | db/db1 | db/db | 401  | 0.047807 | FALSE | 4.197701 | FALSE | Muller cell             |
| GGGATGA | db/db1 | db/db | 2432 | 0.013605 | FALSE | 0.920631 | FALSE | Photoreceptor           |
| GGGATGA | db/db1 | db/db | 1974 | 0.052669 | FALSE | 1.152244 | FALSE | Photoreceptor           |
| GGGATGA | db/db1 | db/db | 1015 | 0.013074 | FALSE | 1.093517 | FALSE | Pericyte                |
| GGGATGA | db/db1 | db/db | 1079 | 0.093319 | FALSE | 0.774138 | FALSE | Photoreceptor           |
| GGGATGA | db/db1 | db/db | 1654 | 0.011561 | FALSE | 0.985838 | FALSE | Endothelia Capillary EC |
| GGGATGA | db/db1 | db/db | 412  | 0.053718 | FALSE | 6.862745 | TRUE  |                         |
| GGGCCAT | db/db1 | db/db | 881  | 0.014151 | FALSE | 1.045216 | FALSE | Endothelia Aterial EC   |
| GGGCCAT | db/db1 | db/db | 1311 | 0.017434 | FALSE | 1.219779 | FALSE | Endothelia Capillary EC |
| GGGCCAT | db/db1 | db/db | 1724 | 0.063221 | FALSE | 0.676906 | FALSE | Photoreceptor           |
| GGGCCAT | db/db1 | db/db | 951  | 0.018422 | FALSE | 1.632396 | FALSE | Endothelia Capillary EC |
| GGGCCAT | db/db1 | db/db | 2074 | 0.068864 | FALSE | 0.972853 | FALSE | Photoreceptor           |
| GGGCCAT | db/db1 | db/db | 2484 | 0.046025 | FALSE | 1.49582  | FALSE | Photoreceptor           |
| GGGCCAT | db/db1 | db/db | 607  | 0.029787 | FALSE | 0.757698 | FALSE | Photoreceptor           |
| GGGCCAT | db/db1 | db/db | 7522 | 0.018761 | FALSE | 0.489341 | FALSE | Photoreceptor           |
| GGGCCAT | db/db1 | db/db | 863  | 0.032546 | FALSE | 2.045873 | FALSE | Photoreceptor           |
| GGGCCAT | db/db1 | db/db | 894  | 0.112477 | TRUE  | 3.652301 | FALSE |                         |
| GGGCCAT | db/db1 | db/db | 846  | 0.026328 | FALSE | 1.381589 | FALSE | Photoreceptor           |
| GGGCGTT | db/db1 | db/db | 2208 | 0.035586 | FALSE | 1.058331 | FALSE | Endothelia Capillary EC |
| GGGCGTT | db/db1 | db/db | 2848 | 0.013605 | FALSE | 1.159788 | FALSE | Photoreceptor           |
| GGGCGTT | db/db1 | db/db | 1372 | 0.022059 | FALSE | 1.06448  | FALSE | Endothelia Aterial EC   |
| GGGCGTT | db/db1 | db/db | 3919 | 0.159016 | TRUE  | 2.02277  | FALSE |                         |
| GGGCGTT | db/db1 | db/db | 2319 | 0.005607 | FALSE | 0.837761 | FALSE | Neuron                  |
| GGGCGTT | db/db1 | db/db | 1794 | 0.070386 | FALSE | 1.135633 | FALSE | Endothelia Venous EC    |
| GGGCGTT | db/db1 | db/db | 2004 | 0.009277 | FALSE | 1.226379 | FALSE | Endothelia Capillary EC |
| GGGCGTT | db/db1 | db/db | 1777 | 0.022455 | FALSE | 1.366797 | FALSE | Microglia               |
| GGGCGTT | db/db1 | db/db | 6815 | 0.159016 | TRUE  | 1.734904 | FALSE |                         |
| GGGCGTT | db/db1 | db/db | 2114 | 0.009277 | FALSE | 1.121499 | FALSE | Endothelia Capillary EC |
| GGGCGTT | db/db1 | db/db | 492  | 0.080645 | FALSE | 19.62865 | TRUE  |                         |
| GGGCTAC | db/db1 | db/db | 4278 | 0.017114 | FALSE | 0.932141 | FALSE | Endothelia EC-C4        |
| GGGCTAC | db/db1 | db/db | 7353 | 0.025868 | FALSE | 0.358404 | FALSE | Photoreceptor           |
| GGGCTAC | db/db1 | db/db | 406  | 0.028754 | FALSE | 3.418199 | FALSE | Photoreceptor           |
| GGGCTAC | db/db1 | db/db | 1799 | 0.018088 | FALSE | 1.256996 | FALSE | Endothelia Capillary EC |
| GGGCTAC | db/db1 | db/db | 5186 | 0.021286 | FALSE | 0.493083 | FALSE | Photoreceptor           |
| GGGCTAC | db/db1 | db/db | 395  | 0.045165 | FALSE | 0.475973 | FALSE | Photoreceptor           |
| GGGCTAC | db/db1 | db/db | 5163 | 0.073582 | FALSE | 0.989932 | FALSE | Photoreceptor           |
| GGGCTAC | db/db1 | db/db | 3678 | 0.011319 | FALSE | 0.694038 | FALSE | Endothelia Venous EC    |
| GGGCTAC | db/db1 | db/db | 635  | 0.017114 | FALSE | 1.249839 | FALSE | Photoreceptor           |
| GGGCTAC | db/db1 | db/db | 935  | 0.022059 | FALSE | 1.087995 | FALSE | Photoreceptor           |
| GGGCTAC | db/db1 | db/db | 836  | 0.044326 | FALSE | 1.537815 | FALSE | Photoreceptor           |
| GGGCTAC | db/db1 | db/db | 3296 | 0.011561 | FALSE | 1.040196 | FALSE | Photoreceptor           |
| GGGCTAC | db/db1 | db/db | 3183 | 0.014429 | FALSE | 1.023056 | FALSE | Photoreceptor           |
| GGGCTCA | db/db1 | db/db | 4268 | 0.037564 | FALSE | 1.128239 | FALSE | Endothelia Venous EC    |
| GGGCTCA | db/db1 | db/db | 1464 | 0.040404 | FALSE | 1.287579 | FALSE | Photoreceptor           |
| GGGCTCA | db/db1 | db/db | 418  | 0.027758 | FALSE | 0.913738 | FALSE | Endothelia Capillary EC |
| GGGCTCA | db/db1 | db/db | 1352 | 0.018761 | FALSE | 0.767743 | FALSE | Photoreceptor           |

|         |        |       |      |          |       |          |       |                        |
|---------|--------|-------|------|----------|-------|----------|-------|------------------------|
| GGGCTCA | db/db1 | db/db | 4098 | 0.016799 | FALSE | 0.836929 | FALSE | Endothelia Venous EC   |
| GGGCTCA | db/db1 | db/db | 1260 | 0.007249 | FALSE | 0.699765 | FALSE | Endothelia EC-C4       |
| GGGCTCA | db/db1 | db/db | 391  | 0.036891 | FALSE | 2.704565 | FALSE | Muller cell            |
| GGGCTCA | db/db1 | db/db | 227  | 0.053718 | FALSE | 4.946872 | FALSE | Muller cell            |
| GGGCTCA | db/db1 | db/db | 4266 | 0.024971 | FALSE | 0.627422 | FALSE | Photoreceptor          |
| GGGTAGA | db/db1 | db/db | 348  | 0.038953 | FALSE | 1.87586  | FALSE | Microglia              |
| GGGTAGA | db/db1 | db/db | 483  | 0.020171 | FALSE | 1.75493  | FALSE | Endothelia Capillary E |
| GGGTATT | db/db1 | db/db | 716  | 0.017434 | FALSE | 0.804568 | FALSE | Photoreceptor          |
| GGGTATT | db/db1 | db/db | 1000 | 0.057037 | FALSE | 1.063437 | FALSE | Photoreceptor          |
| GGGTATT | db/db1 | db/db | 3268 | 0.025868 | FALSE | 0.96224  | FALSE | Photoreceptor          |
| GGGTATT | db/db1 | db/db | 2697 | 0.022455 | FALSE | 1.44819  | FALSE | Photoreceptor          |
| GGGTATT | db/db1 | db/db | 1796 | 0.029787 | FALSE | 1.49652  | FALSE | Endothelia Venous EC   |
| GGGTATT | db/db1 | db/db | 1470 | 0.045165 | FALSE | 1.152479 | FALSE | Photoreceptor          |
| GGGTATT | db/db1 | db/db | 973  | 0.021286 | FALSE | 0.764282 | FALSE | Photoreceptor          |
| GGGTCAC | db/db1 | db/db | 457  | 0.04192  | FALSE | 2.792261 | FALSE | Pericyte               |
| GGGTCAC | db/db1 | db/db | 6862 | 0.445833 | TRUE  | 1.459274 | FALSE |                        |
| GGGTCAC | db/db1 | db/db | 1409 | 0.025868 | FALSE | 1.499106 | FALSE | Endothelia Capillary E |
| GGGTCAC | db/db1 | db/db | 1171 | 0.049679 | FALSE | 2.106945 | FALSE | Photoreceptor          |
| GGGTCAC | db/db1 | db/db | 1626 | 0.051646 | FALSE | 1.251126 | FALSE | Photoreceptor          |
| GGGTCAC | db/db1 | db/db | 503  | 0.043505 | FALSE | 1.377134 | FALSE | Photoreceptor          |
| GGGTCTG | db/db1 | db/db | 3586 | 0.026328 | FALSE | 0.956236 | FALSE | Endothelia EC-C4       |
| GGGTCTG | db/db1 | db/db | 2523 | 0.024105 | FALSE | 1.191742 | FALSE | Endothelia Venous EC   |
| GGGTCTG | db/db1 | db/db | 2445 | 0.023682 | FALSE | 0.986412 | FALSE | Endothelia Capillary E |
| GGGTCTG | db/db1 | db/db | 5407 | 0.031411 | FALSE | 0.926228 | FALSE | Photoreceptor          |
| GGGTCTG | db/db1 | db/db | 757  | 0.067388 | FALSE | 7.366639 | TRUE  |                        |
| GGGTCTG | db/db1 | db/db | 6741 | 0.025416 | FALSE | 0.789666 | FALSE | Photoreceptor          |
| GGGTCTG | db/db1 | db/db | 2080 | 0.073582 | FALSE | 0.654007 | FALSE | Photoreceptor          |
| GGGTGAA | db/db1 | db/db | 898  | 0.070386 | FALSE | 2.041582 | FALSE | Endothelia Capillary E |
| GGGTGAA | db/db1 | db/db | 5781 | 0.023266 | FALSE | 0.513112 | FALSE | Photoreceptor          |
| GGGTGAA | db/db1 | db/db | 795  | 0.019455 | FALSE | 0.436479 | FALSE | Photoreceptor          |
| GGGTGAA | db/db1 | db/db | 3729 | 0.021669 | FALSE | 0.874915 | FALSE | Endothelia EC-C4       |
| GGGTGAA | db/db1 | db/db | 4799 | 0.021669 | FALSE | 0.774093 | FALSE | Photoreceptor          |
| GGGTGAA | db/db1 | db/db | 2871 | 0.021669 | FALSE | 1.157164 | FALSE | Endothelia Venous EC   |
| GGGTGAA | db/db1 | db/db | 1884 | 0.08663  | FALSE | 1.193743 | FALSE | Endothelia Capillary E |
| GGGTGAA | db/db1 | db/db | 8374 | 0.280108 | TRUE  | 0.78259  | FALSE |                        |
| GGGTGTC | db/db1 | db/db | 3705 | 0.061912 | FALSE | 0.832083 | FALSE | Endothelia Venous EC   |
| GGGTGTC | db/db1 | db/db | 478  | 0.016799 | FALSE | 1.416326 | FALSE | Pericyte               |
| GGGTGTC | db/db1 | db/db | 1567 | 0.023266 | FALSE | 0.790463 | FALSE | Photoreceptor          |
| GGGTGTC | db/db1 | db/db | 2864 | 0.035586 | FALSE | 0.642727 | FALSE | Neuron                 |
| GGGTGTC | db/db1 | db/db | 1631 | 0.093319 | FALSE | 1.942479 | FALSE | Photoreceptor          |
| GGGTTAT | db/db1 | db/db | 1427 | 0.033726 | FALSE | 2.433265 | FALSE | Muller cell            |
| GGGTTAT | db/db1 | db/db | 7317 | 0.016799 | FALSE | 0.723419 | FALSE | Photoreceptor          |
| GGGTTAT | db/db1 | db/db | 1819 | 0.015581 | FALSE | 0.626141 | FALSE | Endothelia Capillary E |
| GGGTTAT | db/db1 | db/db | 2007 | 0.025868 | FALSE | 1.079504 | FALSE | Endothelia EC-C4       |
| GGGTTAT | db/db1 | db/db | 1939 | 0.036232 | FALSE | 1.223036 | FALSE | Endothelia Capillary E |
| GGGTTAT | db/db1 | db/db | 951  | 0.031411 | FALSE | 1.141333 | FALSE | Muller cell            |
| GGGTTAT | db/db1 | db/db | 1083 | 0.08663  | FALSE | 1.788706 | FALSE | Photoreceptor          |

|                 |       |      |          |       |          |       |                        |
|-----------------|-------|------|----------|-------|----------|-------|------------------------|
| GGGTTTA/ db/db1 | db/db | 4478 | 0.022857 | FALSE | 0.986303 | FALSE | Photoreceptor          |
| GGGTTTA/ db/db1 | db/db | 375  | 0.047807 | FALSE | 4.494404 | FALSE | Muller cell            |
| GGGTTTA( db/db1 | db/db | 2169 | 0.068864 | FALSE | 1.405483 | FALSE | Endothelia EC-C4       |
| GGGTTTA1 db/db1 | db/db | 5698 | 0.014997 | FALSE | 0.381519 | FALSE | Photoreceptor          |
| GGTAACT/ db/db1 | db/db | 418  | 0.046906 | FALSE | 2.269404 | FALSE | Muller cell            |
| GGTAACT( db/db1 | db/db | 8334 | 0.029787 | FALSE | 0.612009 | FALSE | Photoreceptor          |
| GGTAACT( db/db1 | db/db | 2347 | 0.01981  | FALSE | 0.962394 | FALSE | Endothelia Venous EC   |
| GGTAACT( db/db1 | db/db | 3078 | 0.093319 | FALSE | 1.22086  | FALSE | Endothelia Venous EC   |
| GGTAACT1 db/db1 | db/db | 1348 | 0.049679 | FALSE | 1.066752 | FALSE | Photoreceptor          |
| GGTAACT1 db/db1 | db/db | 2393 | 0.011805 | FALSE | 0.741599 | FALSE | Endothelia Venous EC   |
| GGTAACT1 db/db1 | db/db | 2189 | 0.045165 | FALSE | 1.221665 | FALSE | Photoreceptor          |
| GGTAATC( db/db1 | db/db | 2596 | 0.026328 | FALSE | 1.144842 | FALSE | Endothelia Aterial EC  |
| GGTAATCT db/db1 | db/db | 6822 | 0.016181 | FALSE | 0.622108 | FALSE | Photoreceptor          |
| GGTAATCT db/db1 | db/db | 1438 | 0.025416 | FALSE | 1.268835 | FALSE | Endothelia Capillary E |
| GGTAGAG. db/db1 | db/db | 3266 | 0.012557 | FALSE | 0.900203 | FALSE | Endothelia Venous EC   |
| GGTAGAG. db/db1 | db/db | 2424 | 0.047807 | FALSE | 1.092554 | FALSE | Endothelia Capillary E |
| GGTAGAG. db/db1 | db/db | 5798 | 0.039671 | FALSE | 0.808619 | FALSE | Photoreceptor          |
| GGTCACG( db/db1 | db/db | 2552 | 0.018422 | FALSE | 0.835528 | FALSE | Endothelia Venous EC   |
| GGTCACG( db/db1 | db/db | 3052 | 0.057037 | FALSE | 0.94294  | FALSE | Photoreceptor          |
| GGTCACG( db/db1 | db/db | 6586 | 0.148377 | TRUE  | 2.932512 | FALSE |                        |
| GGTCACG1 db/db1 | db/db | 1017 | 0.03313  | FALSE | 2.184037 | FALSE | Muller cell            |
| GGTCTGG/ db/db1 | db/db | 2821 | 0.022455 | FALSE | 0.913793 | FALSE | Photoreceptor          |
| GGTCTGG( db/db1 | db/db | 2373 | 0.015879 | FALSE | 1.057818 | FALSE | Endothelia Aterial EC  |
| GGTCTGG( db/db1 | db/db | 489  | 0.016181 | FALSE | 2.397631 | FALSE | Endothelia Capillary E |
| GGTCTGG( db/db1 | db/db | 837  | 0.075259 | FALSE | 2.435955 | FALSE | Photoreceptor          |
| GGTCTGG1 db/db1 | db/db | 3460 | 0.08663  | FALSE | 0.607923 | FALSE | Neuron                 |
| GGTGAAG. db/db1 | db/db | 717  | 0.043505 | FALSE | 0.605013 | FALSE | Photoreceptor          |
| GGTGAAG. db/db1 | db/db | 3905 | 0.073582 | FALSE | 0.838    | FALSE | Photoreceptor          |
| GGTGAAG. db/db1 | db/db | 1154 | 0.026796 | FALSE | 1.212955 | FALSE | Endothelia Capillary E |
| GGTGAAG. db/db1 | db/db | 887  | 0.009933 | FALSE | 1.28797  | FALSE | Endothelia Capillary E |
| GGTGAAG. db/db1 | db/db | 6085 | 0.018422 | FALSE | 0.663383 | FALSE | Photoreceptor          |
| GGTGAAG. db/db1 | db/db | 3757 | 0.036891 | FALSE | 1.03453  | FALSE | Photoreceptor          |
| GGTGAAG. db/db1 | db/db | 8555 | 0.209157 | TRUE  | 0.638313 | FALSE |                        |
| GGTGAAG. db/db1 | db/db | 6586 | 0.445833 | TRUE  | 1.90813  | FALSE |                        |
| GGTGAAG. db/db1 | db/db | 3310 | 0.146004 | TRUE  | 3.697595 | FALSE |                        |
| GGTGAAG. db/db1 | db/db | 408  | 0.038953 | FALSE | 2.932969 | FALSE | Photoreceptor          |
| GGTGATT/ db/db1 | db/db | 1734 | 0.028251 | FALSE | 2.130785 | FALSE | Muller cell            |
| GGTGATT/ db/db1 | db/db | 1623 | 0.068864 | FALSE | 1.245271 | FALSE | Endothelia Capillary E |
| GGTGATT/ db/db1 | db/db | 926  | 0.011561 | FALSE | 1.944246 | FALSE | Endothelia EC-C4       |
| GGTGATT( db/db1 | db/db | 1367 | 0.025868 | FALSE | 1.04287  | FALSE | Photoreceptor          |
| GGTGATT( db/db1 | db/db | 3611 | 0.018088 | FALSE | 0.737106 | FALSE | Endothelia Venous EC   |
| GGTGATT( db/db1 | db/db | 1942 | 0.13452  | TRUE  | 1.529149 | FALSE |                        |
| GGTGATT( db/db1 | db/db | 1921 | 0.016799 | FALSE | 1.41761  | FALSE | Endothelia EC-C4       |
| GGTGATT( db/db1 | db/db | 2020 | 0.014429 | FALSE | 1.187885 | FALSE | Endothelia Capillary E |
| GGTGATT1 db/db1 | db/db | 5159 | 0.065957 | FALSE | 0.753026 | FALSE | Endothelia Venous EC   |
| GGTGATT1 db/db1 | db/db | 5771 | 0.035586 | FALSE | 0.818125 | FALSE | Photoreceptor          |
| GGTGGCT/ db/db1 | db/db | 5786 | 0.028251 | FALSE | 0.793242 | FALSE | Photoreceptor          |

|                 |       |       |          |       |          |       |                        |
|-----------------|-------|-------|----------|-------|----------|-------|------------------------|
| GGTGGCT(db/db1  | db/db | 2695  | 0.046906 | FALSE | 1.125785 | FALSE | Photoreceptor          |
| GGTGGCT(db/db1  | db/db | 2782  | 0.020908 | FALSE | 1.081639 | FALSE | Endothelia Capillary E |
| GGTGGCT(db/db1  | db/db | 463   | 0.061912 | FALSE | 1.249415 | FALSE | Photoreceptor          |
| GGTGGCT(db/db1  | db/db | 380   | 0.020908 | FALSE | 2.428826 | FALSE | Endothelia Capillary E |
| GGTGGCT(db/db1  | db/db | 2556  | 0.098234 | FALSE | 5.551181 | TRUE  |                        |
| GGTGGCT(db/db1  | db/db | 2284  | 0.022059 | FALSE | 0.771074 | FALSE | Photoreceptor          |
| GGTGGCT(db/db1  | db/db | 1117  | 0.118682 | TRUE  | 3.985932 | FALSE |                        |
| GGTGGCT db/db1  | db/db | 5708  | 0.027273 | FALSE | 0.685619 | FALSE | Photoreceptor          |
| GGTGGCT db/db1  | db/db | 1747  | 0.015287 | FALSE | 1.112413 | FALSE | Endothelia EC-C4       |
| GGTGGCT db/db1  | db/db | 4182  | 0.045165 | FALSE | 1.096451 | FALSE | Photoreceptor          |
| GGTGTCG db/db1  | db/db | 385   | 0.049679 | FALSE | 1.22323  | FALSE | Pericyte               |
| GGTGTCG db/db1  | db/db | 1707  | 0.016488 | FALSE | 1.224203 | FALSE | Endothelia EC-C4       |
| GGTGTCG db/db1  | db/db | 2875  | 0.055901 | FALSE | 1.020299 | FALSE | Endothelia Capillary E |
| GGTGTCG(db/db1  | db/db | 583   | 0.038953 | FALSE | 0.867411 | FALSE | Photoreceptor          |
| GGTGTCG(db/db1  | db/db | 1226  | 0.052669 | FALSE | 2.025297 | FALSE | Photoreceptor          |
| GGTGTCG(db/db1  | db/db | 490   | 0.046906 | FALSE | 2.378402 | FALSE | Muller cell            |
| GGTGTCG(db/db1  | db/db | 606   | 0.036891 | FALSE | 1.94752  | FALSE | Neuron                 |
| GGTGTCG(db/db1  | db/db | 1118  | 0.022857 | FALSE | 1.988549 | FALSE | Endothelia Capillary E |
| GGTGTCG(db/db1  | db/db | 1241  | 0.012052 | FALSE | 1.146347 | FALSE | Endothelia Capillary E |
| GGTGTCG(db/db1  | db/db | 2479  | 0.033726 | FALSE | 1.104874 | FALSE | Endothelia Venous EC   |
| GGTGTCG(db/db1  | db/db | 452   | 0.082569 | FALSE | 4.499862 | FALSE | Photoreceptor          |
| GGTGTCG(db/db1  | db/db | 11214 | 0.016488 | FALSE | 0.525354 | FALSE | Photoreceptor          |
| GGTGTCG db/db1  | db/db | 2928  | 0.024534 | FALSE | 1.123428 | FALSE | Endothelia Capillary E |
| GGTGTCG db/db1  | db/db | 869   | 0.004762 | FALSE | 1.520961 | FALSE | Pericyte               |
| GGTGTTA db/db1  | db/db | 503   | 0.095727 | FALSE | 4.37448  | FALSE | Photoreceptor          |
| GGTGTTA db/db1  | db/db | 517   | 0.042704 | FALSE | 2.330705 | FALSE | Muller cell            |
| GGTGTTA(db/db1  | db/db | 2149  | 0.057037 | FALSE | 0.908574 | FALSE | Photoreceptor          |
| GGTGTTA(db/db1  | db/db | 1029  | 0.018088 | FALSE | 0.631877 | FALSE | Photoreceptor          |
| GGTGTTA(db/db1  | db/db | 875   | 0.061912 | FALSE | 1.818189 | FALSE | Photoreceptor          |
| GGTGTTA(db/db1  | db/db | 878   | 0.021669 | FALSE | 0.247911 | FALSE | Photoreceptor          |
| GGTGTTA(db/db1  | db/db | 3022  | 0.106408 | TRUE  | 2.874774 | FALSE |                        |
| GGTGTTA(db/db1  | db/db | 1600  | 0.055901 | FALSE | 1.057083 | FALSE | Photoreceptor          |
| GGTGTTA(db/db1  | db/db | 1364  | 0.013338 | FALSE | 1.295381 | FALSE | Endothelia Capillary E |
| GGTGTTA db/db1  | db/db | 1713  | 0.009933 | FALSE | 1.003829 | FALSE | Endothelia Aterial EC  |
| GGTTAAC db/db1  | db/db | 4986  | 0.164835 | TRUE  | 2.19896  | FALSE |                        |
| GGTTAAC db/db1  | db/db | 6241  | 0.017434 | FALSE | 0.640899 | FALSE | Photoreceptor          |
| GGTTAAC db/db1  | db/db | 644   | 0.04192  | FALSE | 2.115177 | FALSE | Photoreceptor          |
| GGTTAAC db/db1  | db/db | 7769  | 0.018422 | FALSE | 0.168167 | FALSE | Photoreceptor          |
| GGTTAAC db/db1  | db/db | 1780  | 0.044326 | FALSE | 1.314197 | FALSE | Endothelia Capillary E |
| GGTTAACT db/db1 | db/db | 678   | 0.020908 | FALSE | 0.274609 | FALSE | Photoreceptor          |
| GGTTAACT db/db1 | db/db | 459   | 0.051646 | FALSE | 0.721707 | FALSE | Photoreceptor          |
| GGTTCTCA db/db1 | db/db | 858   | 0.008032 | FALSE | 1.816333 | FALSE | Endothelia Capillary E |
| GGTTCTCC db/db1 | db/db | 8214  | 0.084562 | FALSE | 0.522136 | FALSE | Photoreceptor          |
| GGTTCTCC db/db1 | db/db | 1619  | 0.051646 | FALSE | 1.517439 | FALSE | Photoreceptor          |
| GGTTCTCC db/db1 | db/db | 4104  | 0.05065  | FALSE | 1.002377 | FALSE | Photoreceptor          |
| GGTTCTCC db/db1 | db/db | 703   | 0.071958 | FALSE | 0.83692  | FALSE | Photoreceptor          |
| GGTTCTCC db/db1 | db/db | 456   | 0.008644 | FALSE | 1.934415 | FALSE | Photoreceptor          |

|                 |       |      |          |       |          |       |                        |
|-----------------|-------|------|----------|-------|----------|-------|------------------------|
| GGTTCTCC db/db1 | db/db | 1957 | 0.011081 | FALSE | 0.355185 | FALSE | Neuron                 |
| GGTTCTCC db/db1 | db/db | 1452 | 0.016799 | FALSE | 1.332425 | FALSE | Endothelia Capillary E |
| GGTTCTCC db/db1 | db/db | 1082 | 0.022857 | FALSE | 1.173263 | FALSE | Photoreceptor          |
| GGTTCTCC db/db1 | db/db | 1377 | 0.123864 | TRUE  | 1.114677 | FALSE |                        |
| GGTTCTCC db/db1 | db/db | 1404 | 0.146004 | TRUE  | 2.136007 | FALSE |                        |
| GGTTCTCC db/db1 | db/db | 551  | 0.159016 | TRUE  | 14.28572 | TRUE  |                        |
| GGTTCTCT db/db1 | db/db | 1049 | 0.05065  | FALSE | 1.508705 | FALSE | Photoreceptor          |
| GGTTCTCT db/db1 | db/db | 540  | 0.04192  | FALSE | 2.187573 | FALSE | Endothelia Capillary E |
| GGTTGTAC db/db1 | db/db | 3217 | 0.100845 | TRUE  | 6.81382  | TRUE  |                        |
| GGTTGTAC db/db1 | db/db | 931  | 0.024971 | FALSE | 0.484186 | FALSE | Neuron                 |
| GGTTGTAC db/db1 | db/db | 4561 | 0.009933 | FALSE | 0.741357 | FALSE | Endothelia EC-C4       |
| GGTTGTAC db/db1 | db/db | 1852 | 0.04192  | FALSE | 0.676193 | FALSE | Photoreceptor          |
| GGTTGTAT db/db1 | db/db | 7451 | 0.023682 | FALSE | 0.537845 | FALSE | Photoreceptor          |
| GGTTGTAT db/db1 | db/db | 1377 | 0.119124 | TRUE  | 6.416629 | TRUE  |                        |
| GTAACAC db/db1  | db/db | 3250 | 0.011081 | FALSE | 0.903822 | FALSE | Endothelia Capillary E |
| GTAACAC db/db1  | db/db | 2168 | 0.021669 | FALSE | 1.002198 | FALSE | Endothelia Venous EC   |
| GTAACAC db/db1  | db/db | 2857 | 0.032546 | FALSE | 1.060038 | FALSE | Photoreceptor          |
| GTAACAC db/db1  | db/db | 1448 | 0.017434 | FALSE | 1.261717 | FALSE | Endothelia Venous EC   |
| GTAACAC db/db1  | db/db | 630  | 0.038953 | FALSE | 1.043556 | FALSE | Photoreceptor          |
| GTAACAC db/db1  | db/db | 3607 | 0.033726 | FALSE | 0.977531 | FALSE | Photoreceptor          |
| GTAACACC db/db1 | db/db | 3498 | 0.100845 | TRUE  | 2.220903 | FALSE |                        |
| GTAACACC db/db1 | db/db | 5108 | 0.100845 | TRUE  | 2.564484 | FALSE |                        |
| GTAACACC db/db1 | db/db | 4826 | 0.011561 | FALSE | 0.761166 | FALSE | Photoreceptor          |
| GTAACACC db/db1 | db/db | 2880 | 0.010157 | FALSE | 0.997812 | FALSE | Photoreceptor          |
| GTAACACC db/db1 | db/db | 2216 | 0.038251 | FALSE | 1.057387 | FALSE | Photoreceptor          |
| GTAACACC db/db1 | db/db | 2803 | 0.065957 | FALSE | 0.963876 | FALSE | Neuron                 |
| GTAACACT db/db1 | db/db | 7396 | 0.013338 | FALSE | 0.66683  | FALSE | Photoreceptor          |
| GTAACCA db/db1  | db/db | 1195 | 0.032546 | FALSE | 1.738705 | FALSE | Pericyte               |
| GTAACCAC db/db1 | db/db | 676  | 0.106408 | TRUE  | 3.983229 | FALSE |                        |
| GTAACCAC db/db1 | db/db | 1032 | 0.042704 | FALSE | 1.635021 | FALSE | Photoreceptor          |
| GTAACCAC db/db1 | db/db | 5289 | 0.025416 | FALSE | 0.817609 | FALSE | Endothelia Venous EC   |
| GTAACCAC db/db1 | db/db | 556  | 0.08663  | FALSE | 0.628266 | FALSE | Photoreceptor          |
| GTAACCAC db/db1 | db/db | 891  | 0.044326 | FALSE | 2.181869 | FALSE | Photoreceptor          |
| GTAACCAC db/db1 | db/db | 976  | 0.04192  | FALSE | 1.396222 | FALSE | Photoreceptor          |
| GTAACCAC db/db1 | db/db | 6932 | 0.014151 | FALSE | 0.565093 | FALSE | Photoreceptor          |
| GTAACCAT db/db1 | db/db | 373  | 0.078788 | FALSE | 4.582001 | FALSE | Muller cell            |
| GTAACCAT db/db1 | db/db | 2232 | 0.026328 | FALSE | 1.232226 | FALSE | Endothelia Aterial EC  |
| GTAACCAT db/db1 | db/db | 2576 | 0.082569 | FALSE | 1.353678 | FALSE | Photoreceptor          |
| GTAAGTCC db/db1 | db/db | 907  | 0.020536 | FALSE | 1.796761 | FALSE | Photoreceptor          |
| GTAAGTCC db/db1 | db/db | 876  | 0.039671 | FALSE | 3.444065 | FALSE | Muller cell            |
| GTAAGTCC db/db1 | db/db | 961  | 0.003345 | FALSE | 0.516294 | FALSE | Pericyte               |
| GTAAGTCT db/db1 | db/db | 7066 | 0.036891 | FALSE | 0.697641 | FALSE | Photoreceptor          |
| GTAAGTCT db/db1 | db/db | 786  | 0.038953 | FALSE | 1.175422 | FALSE | Photoreceptor          |
| GTAATCG db/db1  | db/db | 2175 | 0.009063 | FALSE | 0.877408 | FALSE | Endothelia EC-C4       |
| GTAATCG db/db1  | db/db | 2869 | 0.041154 | FALSE | 1.090313 | FALSE | Endothelia EC-C4       |
| GTAATCG db/db1  | db/db | 2231 | 0.017758 | FALSE | 1.107003 | FALSE | Endothelia Aterial EC  |
| GTAATCG db/db1  | db/db | 2565 | 0.022059 | FALSE | 1.029881 | FALSE | Endothelia Capillary E |

|                 |       |      |          |       |          |       |                        |
|-----------------|-------|------|----------|-------|----------|-------|------------------------|
| GTAATCGC db/db1 | db/db | 1992 | 0.071958 | FALSE | 1.263726 | FALSE | Photoreceptor          |
| GTAATCGC db/db1 | db/db | 3751 | 0.184701 | TRUE  | 2.38211  | FALSE |                        |
| GTAATCGC db/db1 | db/db | 2486 | 0.046025 | FALSE | 1.68098  | FALSE | Endothelia Capillary E |
| GTAATCGT db/db1 | db/db | 1186 | 0.064568 | FALSE | 1.788724 | FALSE | Photoreceptor          |
| GTAATGC db/db1  | db/db | 3446 | 0.357022 | TRUE  | 1.975879 | FALSE |                        |
| GTAATGCC db/db1 | db/db | 2853 | 0.022455 | FALSE | 0.959301 | FALSE | Photoreceptor          |
| GTAATGCC db/db1 | db/db | 1329 | 0.112477 | TRUE  | 9.333333 | TRUE  |                        |
| GTAATGCT db/db1 | db/db | 3386 | 0.036891 | FALSE | 1.470924 | FALSE | Neuron                 |
| GTAATGCT db/db1 | db/db | 2033 | 0.070386 | FALSE | 1.138541 | FALSE | Photoreceptor          |
| GTAATGCT db/db1 | db/db | 394  | 0.209157 | TRUE  | 16.04278 | TRUE  |                        |
| GTACAAC db/db1  | db/db | 975  | 0.068864 | FALSE | 1.8463   | FALSE | Photoreceptor          |
| GTACAACC db/db1 | db/db | 2840 | 0.138889 | TRUE  | 4.025489 | FALSE |                        |
| GTACAACC db/db1 | db/db | 3371 | 0.046025 | FALSE | 0.791512 | FALSE | Photoreceptor          |
| GTACAACC db/db1 | db/db | 2219 | 0.020536 | FALSE | 0.835317 | FALSE | Endothelia EC-C4       |
| GTACAAC db/db1  | db/db | 2640 | 0.023682 | FALSE | 0.827425 | FALSE | Endothelia Capillary E |
| GTACAAC db/db1  | db/db | 3701 | 0.013876 | FALSE | 0.733715 | FALSE | Photoreceptor          |
| GTACAAC db/db1  | db/db | 902  | 0.016799 | FALSE | 0.24082  | FALSE | Photoreceptor          |
| GTACAGT db/db1  | db/db | 1128 | 0.088776 | FALSE | 10.84133 | TRUE  |                        |
| GTACAGTC db/db1 | db/db | 1916 | 0.046025 | FALSE | 1.067556 | FALSE | Photoreceptor          |
| GTACAGTC db/db1 | db/db | 4874 | 0.046906 | FALSE | 0.920564 | FALSE | Photoreceptor          |
| GTACAGTC db/db1 | db/db | 5944 | 0.064568 | FALSE | 0.907862 | FALSE | Photoreceptor          |
| GTACAGTC db/db1 | db/db | 1588 | 0.03313  | FALSE | 1.035723 | FALSE | Endothelia Capillary E |
| GTACAGTC db/db1 | db/db | 2208 | 0.048732 | FALSE | 1.059498 | FALSE | Neuron                 |
| GTACAGTT db/db1 | db/db | 3232 | 0.028754 | FALSE | 0.509043 | FALSE | Endothelia Aterial EC  |
| GTACAGTT db/db1 | db/db | 548  | 0.018422 | FALSE | 3.449758 | FALSE | Photoreceptor          |
| GTACAGTT db/db1 | db/db | 1427 | 0.12692  | TRUE  | 3.771088 | FALSE |                        |
| GTACAGTT db/db1 | db/db | 2510 | 0.04192  | FALSE | 1.228457 | FALSE | Photoreceptor          |
| GTAGAAA db/db1  | db/db | 433  | 0.046025 | FALSE | 1.600673 | FALSE | Photoreceptor          |
| GTAGAAA db/db1  | db/db | 866  | 0.068864 | FALSE | 1.294057 | FALSE | Photoreceptor          |
| GTAGAAA db/db1  | db/db | 1897 | 0.126958 | TRUE  | 1.514693 | FALSE |                        |
| GTAGAAA db/db1  | db/db | 852  | 0.043505 | FALSE | 1.864035 | FALSE | Photoreceptor          |
| GTAGAAA db/db1  | db/db | 1587 | 0.084562 | FALSE | 6.116643 | TRUE  |                        |
| GTAGAAA db/db1  | db/db | 572  | 0.043505 | FALSE | 1.071741 | FALSE | Photoreceptor          |
| GTAGAAA db/db1  | db/db | 2390 | 0.028251 | FALSE | 0.993846 | FALSE | Microglia              |
| GTAGAAA db/db1  | db/db | 3713 | 0.010384 | FALSE | 0.79449  | FALSE | Endothelia EC-C4       |
| GTAGAAA db/db1  | db/db | 634  | 0.029787 | FALSE | 0.778097 | FALSE | Photoreceptor          |
| GTAGAAA db/db1  | db/db | 1700 | 0.058205 | FALSE | 1.172166 | FALSE | Photoreceptor          |
| GTAGAAA db/db1  | db/db | 923  | 0.051646 | FALSE | 1.35454  | FALSE | Photoreceptor          |
| GTAGAGG db/db1  | db/db | 1892 | 0.007833 | FALSE | 0.920299 | FALSE | Endothelia EC-C4       |
| GTAGAGG db/db1  | db/db | 864  | 0.027273 | FALSE | 3.906216 | FALSE | Muller cell            |
| GTAGAGG db/db1  | db/db | 2123 | 0.023682 | FALSE | 0.763646 | FALSE | Photoreceptor          |
| GTAGAGG db/db1  | db/db | 979  | 0.064568 | FALSE | 1.875908 | FALSE | Muller cell            |
| GTAGAGG db/db1  | db/db | 1696 | 0.023266 | FALSE | 0.883292 | FALSE | Photoreceptor          |
| GTAGATCC db/db1 | db/db | 387  | 0.011561 | FALSE | 1.310352 | FALSE | Photoreceptor          |
| GTAGATCC db/db1 | db/db | 2102 | 0.003803 | FALSE | 1.019127 | FALSE | Neuron                 |
| GTAGATCC db/db1 | db/db | 5246 | 0.018422 | FALSE | 0.483335 | FALSE | Photoreceptor          |
| GTAGATCT db/db1 | db/db | 3313 | 0.022857 | FALSE | 0.737763 | FALSE | Photoreceptor          |



|                 |       |      |          |       |          |       |                        |
|-----------------|-------|------|----------|-------|----------|-------|------------------------|
| GTAGCTA/ db/db1 | db/db | 3189 | 0.030318 | FALSE | 1.003078 | FALSE | Endothelia Capillary E |
| GTAGCTA/ db/db1 | db/db | 3536 | 0.026796 | FALSE | 1.064451 | FALSE | Photoreceptor          |
| GTAGCTA/ db/db1 | db/db | 858  | 0.130259 | TRUE  | 1.129032 | FALSE |                        |
| GTAGCTA/ db/db1 | db/db | 897  | 0.053718 | FALSE | 1.816945 | FALSE | Photoreceptor          |
| GTAGCTA/ db/db1 | db/db | 4810 | 0.014711 | FALSE | 0.619032 | FALSE | Photoreceptor          |
| GTAGCTA/ db/db1 | db/db | 1453 | 0.005958 | FALSE | 1.605679 | FALSE | Endothelia Capillary E |
| GTAGCTA( db/db1 | db/db | 1773 | 0.014997 | FALSE | 1.236152 | FALSE | Endothelia Capillary E |
| GTAGCTA( db/db1 | db/db | 1060 | 0.067388 | FALSE | 0.931356 | FALSE | Photoreceptor          |
| GTAGCTA( db/db1 | db/db | 1176 | 0.052669 | FALSE | 0.576814 | FALSE | Photoreceptor          |
| GTAGCTA( db/db1 | db/db | 2309 | 0.003497 | FALSE | 1.375881 | FALSE | Neuron                 |
| GTAGCTA( db/db1 | db/db | 5534 | 0.013338 | FALSE | 0.614651 | FALSE | Photoreceptor          |
| GTAGCTA( db/db1 | db/db | 506  | 0.058205 | FALSE | 2.441972 | FALSE | Muller cell            |
| GTAGCTA( db/db1 | db/db | 1655 | 0.005958 | FALSE | 0.922593 | FALSE | Endothelia Capillary E |
| GTAGCTA  db/db1 | db/db | 4201 | 0.031411 | FALSE | 0.853678 | FALSE | Photoreceptor          |
| GTAGGAG db/db1  | db/db | 736  | 0.064568 | FALSE | 13.47053 | TRUE  |                        |
| GTAGGAG db/db1  | db/db | 1447 | 0.008438 | FALSE | 1.462198 | FALSE | Photoreceptor          |
| GTAGGAG db/db1  | db/db | 699  | 0.005264 | FALSE | 2.129598 | FALSE | Endothelia Capillary E |
| GTAGGAG db/db1  | db/db | 2365 | 0.093319 | FALSE | 1.577709 | FALSE | Endothelia Capillary E |
| GTAGGAG db/db1  | db/db | 1949 | 0.078788 | FALSE | 1.636231 | FALSE | Photoreceptor          |
| GTAGGAG db/db1  | db/db | 2348 | 0.033726 | FALSE | 1.454797 | FALSE | Endothelia EC-C4       |
| GTAGGAG db/db1  | db/db | 2095 | 0.046025 | FALSE | 1.0287   | FALSE | Microglia              |
| GTAGGAG db/db1  | db/db | 3140 | 0.007833 | FALSE | 0.713698 | FALSE | Neuron                 |
| GTAGGAG db/db1  | db/db | 390  | 0.122388 | TRUE  | 2.877698 | FALSE |                        |
| GTAGGAG db/db1  | db/db | 3479 | 0.058205 | FALSE | 1.129254 | FALSE | Neuron                 |
| GTAGGAG db/db1  | db/db | 1101 | 0.445833 | TRUE  | 4.456655 | FALSE |                        |
| GTAGGAG db/db1  | db/db | 1510 | 0.130374 | TRUE  | 17.01906 | TRUE  |                        |
| GTAGGTT( db/db1 | db/db | 582  | 0.015879 | FALSE | 0.482266 | FALSE | Photoreceptor          |
| GTAGGTT( db/db1 | db/db | 1342 | 0.016488 | FALSE | 1.087209 | FALSE | Endothelia EC-C4       |
| GTAGGTT( db/db1 | db/db | 1521 | 0.013338 | FALSE | 1.306219 | FALSE | Endothelia EC-C4       |
| GTAGGTT( db/db1 | db/db | 1841 | 0.041154 | FALSE | 5.543595 | TRUE  |                        |
| GTAGGTT  db/db1 | db/db | 2403 | 0.035586 | FALSE | 0.903882 | FALSE | Photoreceptor          |
| GTAGGTT  db/db1 | db/db | 2140 | 0.038251 | FALSE | 0.708298 | FALSE | Neuron                 |
| GTAGGTT  db/db1 | db/db | 8142 | 0.021669 | FALSE | 0.519405 | FALSE | Photoreceptor          |
| GTAGTAC/ db/db1 | db/db | 4739 | 0.030318 | FALSE | 0.680644 | FALSE | Endothelia Venous EC   |
| GTAGTAC/ db/db1 | db/db | 833  | 0.049679 | FALSE | 0.918597 | FALSE | Photoreceptor          |
| GTAGTAC/ db/db1 | db/db | 5455 | 0.013605 | FALSE | 0.97089  | FALSE | Photoreceptor          |
| GTAGTAC( db/db1 | db/db | 633  | 0.051646 | FALSE | 1.253028 | FALSE | Photoreceptor          |
| GTAGTAC( db/db1 | db/db | 3377 | 0.020908 | FALSE | 1.346297 | FALSE | Endothelia Venous EC   |
| GTAGTAC( db/db1 | db/db | 3147 | 0.022059 | FALSE | 1.009383 | FALSE | Endothelia EC-C4       |
| GTAGTAC  db/db1 | db/db | 1526 | 0.022059 | FALSE | 1.235058 | FALSE | Endothelia Venous EC   |
| GTAGTAC  db/db1 | db/db | 615  | 0.047807 | FALSE | 1.619262 | FALSE | Neuron                 |
| GTAGTAC  db/db1 | db/db | 570  | 0.029266 | FALSE | 1.471889 | FALSE | Muller cell            |
| GTATTGG( db/db1 | db/db | 469  | 0.048732 | FALSE | 2.447102 | FALSE | Photoreceptor          |
| GTATTGG( db/db1 | db/db | 840  | 0.078788 | FALSE | 1.09283  | FALSE | Photoreceptor          |
| GTATTGG( db/db1 | db/db | 642  | 0.054795 | FALSE | 1.739338 | FALSE | Endothelia Capillary E |
| GTATTGG( db/db1 | db/db | 2269 | 0.138889 | TRUE  | 5.484015 | TRUE  |                        |
| GTATTGG( db/db1 | db/db | 7762 | 0.054795 | FALSE | 0.57919  | FALSE | Photoreceptor          |

|                  |       |      |          |       |          |       |                        |
|------------------|-------|------|----------|-------|----------|-------|------------------------|
| GTATTGGC db/db1  | db/db | 5337 | 0.148377 | TRUE  | 1.582456 | FALSE |                        |
| GTATTGGC db/db1  | db/db | 824  | 0.057037 | FALSE | 1.254553 | FALSE | Photoreceptor          |
| GTATTGGC db/db1  | db/db | 3814 | 0.04192  | FALSE | 1.012985 | FALSE | Endothelia Venous EC   |
| GTATTGGT db/db1  | db/db | 1172 | 0.127704 | TRUE  | 1.69364  | FALSE |                        |
| GTATTTCA db/db1  | db/db | 2295 | 0.033726 | FALSE | 1.070419 | FALSE | Neuron                 |
| GTATTTCA db/db1  | db/db | 1162 | 0.047807 | FALSE | 0.744747 | FALSE | Photoreceptor          |
| GTATTTCA db/db1  | db/db | 539  | 0.023266 | FALSE | 3.945373 | FALSE | Muller cell            |
| GTATTTCC db/db1  | db/db | 4226 | 0.031973 | FALSE | 0.821133 | FALSE | Photoreceptor          |
| GTATTTCC db/db1  | db/db | 1721 | 0.027273 | FALSE | 1.231709 | FALSE | Neuron                 |
| GTATTTCC db/db1  | db/db | 866  | 0.013338 | FALSE | 1.339267 | FALSE | Endothelia Capillary E |
| GTATTTCCG db/db1 | db/db | 6188 | 0.016799 | FALSE | 0.491624 | FALSE | Photoreceptor          |
| GTATTTCCG db/db1 | db/db | 1638 | 0.017434 | FALSE | 0.919732 | FALSE | Photoreceptor          |
| GTATTTCCG db/db1 | db/db | 1362 | 0.041154 | FALSE | 1.196324 | FALSE | Endothelia Capillary E |
| GTATTTCT db/db1  | db/db | 861  | 0.095727 | FALSE | 5.725807 | TRUE  |                        |
| GTATTTCT db/db1  | db/db | 3787 | 0.035586 | FALSE | 0.798078 | FALSE | Photoreceptor          |
| GTCAAAC db/db1   | db/db | 2806 | 0.017758 | FALSE | 0.994323 | FALSE | Endothelia EC-C4       |
| GTCAAAC db/db1   | db/db | 954  | 0.049679 | FALSE | 1.915075 | FALSE | Endothelia Aterial EC  |
| GTCAAAC db/db1   | db/db | 3344 | 0.034334 | FALSE | 1.289413 | FALSE | Endothelia Venous EC   |
| GTCAAAC db/db1   | db/db | 1578 | 0.014151 | FALSE | 1.686423 | FALSE | Photoreceptor          |
| GTCAAACC db/db1  | db/db | 337  | 0.100165 | TRUE  | 1.188455 | FALSE |                        |
| GTCAAACC db/db1  | db/db | 7377 | 0.022857 | FALSE | 0.510706 | FALSE | Photoreceptor          |
| GTCAAACC db/db1  | db/db | 5382 | 0.024105 | FALSE | 0.806091 | FALSE | Photoreceptor          |
| GTCAAACC db/db1  | db/db | 947  | 0.075259 | FALSE | 2.065635 | FALSE | Photoreceptor          |
| GTCAAACC db/db1  | db/db | 2370 | 0.014429 | FALSE | 1.295353 | FALSE | Endothelia Capillary E |
| GTCAAACC db/db1  | db/db | 602  | 0.159016 | TRUE  | 1.553166 | FALSE |                        |
| GTCAAACC db/db1  | db/db | 3935 | 0.014711 | FALSE | 0.903321 | FALSE | Endothelia Venous EC   |
| GTCAAACC db/db1  | db/db | 1916 | 0.026328 | FALSE | 1.216482 | FALSE | Endothelia Capillary E |
| GTCAAACC db/db1  | db/db | 626  | 0.026328 | FALSE | 1.102611 | FALSE | Photoreceptor          |
| GTCAAACC db/db1  | db/db | 1253 | 0.113205 | TRUE  | 4.05506  | FALSE |                        |
| GTCAAGT db/db1   | db/db | 2444 | 0.032546 | FALSE | 0.981978 | FALSE | Endothelia Aterial EC  |
| GTCAAGT db/db1   | db/db | 1412 | 0.051646 | FALSE | 2.045972 | FALSE | Photoreceptor          |
| GTCAAGT db/db1   | db/db | 782  | 0.091004 | FALSE | 1.234114 | FALSE | Photoreceptor          |
| GTCAAGT db/db1   | db/db | 451  | 0.067388 | FALSE | 1.565688 | FALSE | Photoreceptor          |
| GTCAAGT db/db1   | db/db | 587  | 0.018761 | FALSE | 0.510585 | FALSE | Photoreceptor          |
| GTCAAGT db/db1   | db/db | 438  | 0.018422 | FALSE | 3.252118 | FALSE | Endothelia Capillary E |
| GTCACGG db/db1   | db/db | 4723 | 0.026328 | FALSE | 0.741278 | FALSE | Endothelia EC-C4       |
| GTCACGG db/db1   | db/db | 2327 | 0.016181 | FALSE | 0.467979 | FALSE | Photoreceptor          |
| GTCACGG db/db1   | db/db | 1137 | 0.057037 | FALSE | 2.086516 | FALSE | Photoreceptor          |
| GTCACGG db/db1   | db/db | 3737 | 0.030318 | FALSE | 0.884007 | FALSE | Photoreceptor          |
| GTCACGG db/db1   | db/db | 1447 | 0.009277 | FALSE | 0.936532 | FALSE | Endothelia Capillary E |
| GTCACTCA db/db1  | db/db | 1380 | 0.022059 | FALSE | 0.713288 | FALSE | Photoreceptor          |
| GTCACTCA db/db1  | db/db | 2262 | 0.088776 | FALSE | 0.783269 | FALSE | Photoreceptor          |
| GTCACTCC db/db1  | db/db | 2106 | 0.068864 | FALSE | 1.262431 | FALSE | Neuron                 |
| GTCACTCC db/db1  | db/db | 5336 | 0.028754 | FALSE | 0.955729 | FALSE | Photoreceptor          |
| GTCACTCC db/db1  | db/db | 1619 | 0.017434 | FALSE | 1.382768 | FALSE | Endothelia EC-C4       |
| GTCACTCC db/db1  | db/db | 633  | 0.049679 | FALSE | 1.331717 | FALSE | Photoreceptor          |
| GTCACTCC db/db1  | db/db | 848  | 0.020908 | FALSE | 2.035086 | FALSE | Endothelia EC-C4       |

|                 |       |      |          |       |          |       |                        |
|-----------------|-------|------|----------|-------|----------|-------|------------------------|
| GTCACTCC db/db1 | db/db | 451  | 0.029266 | FALSE | 2.874233 | FALSE | Muller cell            |
| GTCACTCC db/db1 | db/db | 739  | 0.109971 | TRUE  | 3.336422 | FALSE |                        |
| GTCACTCC db/db1 | db/db | 3955 | 0.038953 | FALSE | 0.894329 | FALSE | Endothelia Venous EC   |
| GTCACTCC db/db1 | db/db | 874  | 0.073582 | FALSE | 1.278036 | FALSE | Photoreceptor          |
| GTCACTCC db/db1 | db/db | 1218 | 0.08663  | FALSE | 5.646719 | TRUE  |                        |
| GTCACTCC db/db1 | db/db | 1171 | 0.015581 | FALSE | 1.469218 | FALSE | Endothelia EC-C4       |
| GTCACTCC db/db1 | db/db | 7462 | 0.027758 | FALSE | 0.681977 | FALSE | Photoreceptor          |
| GTCACTCC db/db1 | db/db | 685  | 0.093319 | FALSE | 1.615601 | FALSE | Photoreceptor          |
| GTCACTCT db/db1 | db/db | 1771 | 0.073582 | FALSE | 1.628538 | FALSE | Photoreceptor          |
| GTCACTCT db/db1 | db/db | 2455 | 0.024971 | FALSE | 1.322233 | FALSE | Endothelia EC-C4       |
| GTCACTCT db/db1 | db/db | 701  | 0.034954 | FALSE | 1.474728 | FALSE | Photoreceptor          |
| GTCAGCG db/db1  | db/db | 592  | 0.028754 | FALSE | 0.474503 | FALSE | Photoreceptor          |
| GTCAGCG db/db1  | db/db | 3158 | 0.027273 | FALSE | 0.91477  | FALSE | Endothelia Venous EC   |
| GTCAGCG db/db1  | db/db | 620  | 0.053718 | FALSE | 1.205061 | FALSE | Photoreceptor          |
| GTCAGCG db/db1  | db/db | 1921 | 0.027273 | FALSE | 1.207488 | FALSE | Endothelia Capillary E |
| GTCAGCG db/db1  | db/db | 3640 | 0.016181 | FALSE | 0.529314 | FALSE | Photoreceptor          |
| GTCAGCG db/db1  | db/db | 2555 | 0.063221 | FALSE | 1.064687 | FALSE | Endothelia Venous EC   |
| GTCAGCG db/db1  | db/db | 575  | 0.150727 | TRUE  | 3.979461 | FALSE |                        |
| GTCAGCG db/db1  | db/db | 1472 | 0.044326 | FALSE | 1.525294 | FALSE | Photoreceptor          |
| GTCAGCG db/db1  | db/db | 1109 | 0.063221 | FALSE | 11.89711 | TRUE  |                        |
| GTCATCCA db/db1 | db/db | 1219 | 0.078788 | FALSE | 1.942719 | FALSE | Photoreceptor          |
| GTCATCCA db/db1 | db/db | 1917 | 0.022059 | FALSE | 1.134502 | FALSE | Endothelia Capillary E |
| GTCATCCA db/db1 | db/db | 2150 | 0.019455 | FALSE | 1.08699  | FALSE | Endothelia Venous EC   |
| GTCATCCC db/db1 | db/db | 1545 | 0.036891 | FALSE | 0.690244 | FALSE | Photoreceptor          |
| GTCATCCC db/db1 | db/db | 2540 | 0.014151 | FALSE | 1.047772 | FALSE | Photoreceptor          |
| GTCATGA db/db1  | db/db | 625  | 0.049679 | FALSE | 0.970803 | FALSE | Photoreceptor          |
| GTCATGA db/db1  | db/db | 5484 | 0.106408 | TRUE  | 1.918977 | FALSE |                        |
| GTCATGA db/db1  | db/db | 3016 | 0.019106 | FALSE | 1.101642 | FALSE | Endothelia Capillary E |
| GTCATGA db/db1  | db/db | 737  | 0.015581 | FALSE | 1.67038  | FALSE | Endothelia Capillary E |
| GTCATGA db/db1  | db/db | 2417 | 0.109375 | TRUE  | 1.150185 | FALSE |                        |
| GTCATGA db/db1  | db/db | 3432 | 0.015879 | FALSE | 1.062117 | FALSE | Endothelia Capillary E |
| GTCATTTA db/db1 | db/db | 1663 | 0.017434 | FALSE | 1.255538 | FALSE | Endothelia EC-C4       |
| GTCATTTC db/db1 | db/db | 1926 | 0.011561 | FALSE | 1.089518 | FALSE | Endothelia EC-C4       |
| GTCATTTG db/db1 | db/db | 818  | 0.070386 | FALSE | 1.054481 | FALSE | Photoreceptor          |
| GTCCACTC db/db1 | db/db | 1604 | 0.022857 | FALSE | 0.959713 | FALSE | Endothelia Capillary E |
| GTCCACTC db/db1 | db/db | 411  | 0.017114 | FALSE | 3.076571 | FALSE | Photoreceptor          |
| GTCCACTC db/db1 | db/db | 2417 | 0.017758 | FALSE | 0.846653 | FALSE | Endothelia Venous EC   |
| GTCCACTC db/db1 | db/db | 787  | 0.018761 | FALSE | 3.929046 | FALSE | Muller cell            |
| GTCCACTC db/db1 | db/db | 2444 | 0.024534 | FALSE | 0.92771  | FALSE | Endothelia Capillary E |
| GTCCACTC db/db1 | db/db | 1788 | 0.015879 | FALSE | 0.916142 | FALSE | Endothelia EC-C4       |
| GTCCACTT db/db1 | db/db | 1249 | 0.060641 | FALSE | 1.996424 | FALSE | Photoreceptor          |
| GTCCACTT db/db1 | db/db | 8918 | 0.024534 | FALSE | 0.547717 | FALSE | Photoreceptor          |
| GTCCACTT db/db1 | db/db | 2612 | 0.040404 | FALSE | 1.51813  | FALSE | Photoreceptor          |
| GTCCCATA db/db1 | db/db | 1864 | 0.024534 | FALSE | 1.30489  | FALSE | Endothelia Capillary E |
| GTCCCATC db/db1 | db/db | 3516 | 0.031973 | FALSE | 0.966633 | FALSE | Endothelia Capillary E |
| GTCCCATC db/db1 | db/db | 4727 | 0.228861 | TRUE  | 1.855501 | FALSE |                        |
| GTCCCATC db/db1 | db/db | 2610 | 0.024105 | FALSE | 1.110098 | FALSE | Endothelia Capillary E |

|                 |       |      |          |       |          |       |                        |
|-----------------|-------|------|----------|-------|----------|-------|------------------------|
| GTCCTCAA db/db1 | db/db | 1574 | 0.106646 | TRUE  | 1.054173 | FALSE |                        |
| GTCCTCAC db/db1 | db/db | 1079 | 0.095727 | FALSE | 9.327926 | TRUE  |                        |
| GTCCTCAC db/db1 | db/db | 833  | 0.00687  | FALSE | 1.783283 | FALSE | Endothelia Capillary E |
| GTCCTCAC db/db1 | db/db | 513  | 0.043505 | FALSE | 3.972567 | FALSE | Muller cell            |
| GTCCTCAC db/db1 | db/db | 1187 | 0.078788 | FALSE | 2.157528 | FALSE | Muller cell            |
| GTCCTCAC db/db1 | db/db | 3080 | 0.019106 | FALSE | 1.129181 | FALSE | Photoreceptor          |
| GTCCTCAC db/db1 | db/db | 2534 | 0.052669 | FALSE | 0.95588  | FALSE | Endothelia EC-C4       |
| GTCCTCAC db/db1 | db/db | 398  | 0.143501 | TRUE  | 2.371542 | FALSE |                        |
| GTCGAAT/ db/db1 | db/db | 597  | 0.046025 | FALSE | 1.779551 | FALSE | Photoreceptor          |
| GTCGAAT/ db/db1 | db/db | 958  | 0.065957 | FALSE | 2.597079 | FALSE | Neuron                 |
| GTCGAAT/ db/db1 | db/db | 1506 | 0.024534 | FALSE | 0.503179 | FALSE | Photoreceptor          |
| GTCGAAT( db/db1 | db/db | 1604 | 0.016488 | FALSE | 1.162331 | FALSE | Endothelia Capillary E |
| GTCGAAT( db/db1 | db/db | 905  | 0.017434 | FALSE | 1.416534 | FALSE | Endothelia EC-C4       |
| GTCGAATT db/db1 | db/db | 2189 | 0.025416 | FALSE | 1.241955 | FALSE | Endothelia Venous EC   |
| GTCGAATT db/db1 | db/db | 735  | 0.027273 | FALSE | 2.254515 | FALSE | Photoreceptor          |
| GTCGCGA/ db/db1 | db/db | 3471 | 0.009933 | FALSE | 0.866232 | FALSE | Photoreceptor          |
| GTCGCGA( db/db1 | db/db | 1016 | 0.098234 | FALSE | 1.632301 | FALSE | Photoreceptor          |
| GTCGCGA( db/db1 | db/db | 1971 | 0.01981  | FALSE | 0.969564 | FALSE | Endothelia Capillary E |
| GTCGCGA( db/db1 | db/db | 1500 | 0.115723 | TRUE  | 5.333334 | TRUE  |                        |
| GTCGCGA1 db/db1 | db/db | 1394 | 0.024105 | FALSE | 1.75148  | FALSE | Endothelia Capillary E |
| GTCGCGA1 db/db1 | db/db | 2491 | 0.025416 | FALSE | 0.991156 | FALSE | Photoreceptor          |
| GTCGCGA1 db/db1 | db/db | 926  | 0.011805 | FALSE | 2.074947 | FALSE | Endothelia Capillary E |
| GTCGTAA/ db/db1 | db/db | 1467 | 0.008438 | FALSE | 1.525654 | FALSE | Endothelia Capillary E |
| GTCGTAA( db/db1 | db/db | 2816 | 0.071958 | FALSE | 1.078104 | FALSE | Photoreceptor          |
| GTCGTAA( db/db1 | db/db | 3315 | 0.019106 | FALSE | 0.851579 | FALSE | Endothelia EC-C4       |
| GTCGTAA1 db/db1 | db/db | 8772 | 0.024105 | FALSE | 0.522177 | FALSE | Photoreceptor          |
| GTCGTTCA db/db1 | db/db | 5967 | 0.025868 | FALSE | 0.457982 | FALSE | Photoreceptor          |
| GTCGTTCA db/db1 | db/db | 2546 | 0.028754 | FALSE | 1.197371 | FALSE | Endothelia Aterial EC  |
| GTCGTTCA db/db1 | db/db | 1103 | 0.065957 | FALSE | 1.691192 | FALSE | Muller cell            |
| GTCGTTCA db/db1 | db/db | 1378 | 0.039671 | FALSE | 0.982752 | FALSE | Endothelia Capillary E |
| GTCGTTCC db/db1 | db/db | 2212 | 0.026328 | FALSE | 1.140773 | FALSE | Endothelia Capillary E |
| GTCGTTCC db/db1 | db/db | 7274 | 0.024105 | FALSE | 0.59952  | FALSE | Photoreceptor          |
| GTCGTTCC db/db1 | db/db | 1446 | 0.023682 | FALSE | 0.929996 | FALSE | Endothelia Venous EC   |
| GTCGTTCC db/db1 | db/db | 2104 | 0.05065  | FALSE | 1.191444 | FALSE | Endothelia Capillary E |
| GTCGTTCC db/db1 | db/db | 1399 | 0.063221 | FALSE | 1.711469 | FALSE | Photoreceptor          |
| GTCGTTCC db/db1 | db/db | 2155 | 0.017758 | FALSE | 1.008495 | FALSE | Endothelia Venous EC   |
| GTCGTTCC db/db1 | db/db | 1436 | 0.064568 | FALSE | 1.468233 | FALSE | Photoreceptor          |
| GTCTACCA db/db1 | db/db | 3183 | 0.025416 | FALSE | 0.894712 | FALSE | Photoreceptor          |
| GTCTACCC db/db1 | db/db | 2671 | 0.038953 | FALSE | 1.034812 | FALSE | Photoreceptor          |
| GTCTACCC db/db1 | db/db | 468  | 0.046906 | FALSE | 2.932417 | FALSE | Photoreceptor          |
| GTCTACCC db/db1 | db/db | 2815 | 0.012303 | FALSE | 1.243428 | FALSE | Photoreceptor          |
| GTCTACCT db/db1 | db/db | 783  | 0.071958 | FALSE | 2.381376 | FALSE | Endothelia Capillary E |
| GTCTACCT db/db1 | db/db | 1740 | 0.041154 | FALSE | 1.100657 | FALSE | Photoreceptor          |
| GTCTAGAC db/db1 | db/db | 920  | 0.088776 | FALSE | 1.535987 | FALSE | Photoreceptor          |
| GTCTAGAC db/db1 | db/db | 770  | 0.039671 | FALSE | 2.531541 | FALSE | Endothelia Capillary E |
| GTCTAGAC db/db1 | db/db | 1402 | 0.013876 | FALSE | 0.847972 | FALSE | Endothelia EC-C4       |
| GTCTAGAC db/db1 | db/db | 1173 | 0.006137 | FALSE | 1.234956 | FALSE | Pericyte               |

|                 |       |      |          |       |          |       |                        |
|-----------------|-------|------|----------|-------|----------|-------|------------------------|
| GTCTAGAC db/db1 | db/db | 3837 | 0.025868 | FALSE | 0.921365 | FALSE | Endothelia Venous EC   |
| GTCTCACA db/db1 | db/db | 4134 | 0.112477 | TRUE  | 2.533883 | FALSE |                        |
| GTCTCACA db/db1 | db/db | 1029 | 0.037564 | FALSE | 2.500195 | FALSE | Muller cell            |
| GTCTCACA db/db1 | db/db | 3693 | 0.122691 | TRUE  | 2.585217 | FALSE |                        |
| GTCTCACC db/db1 | db/db | 671  | 0.049679 | FALSE | 4.466565 | FALSE | Muller cell            |
| GTCTCACC db/db1 | db/db | 2415 | 0.091004 | FALSE | 1.584566 | FALSE | Photoreceptor          |
| GTCTCACC db/db1 | db/db | 2450 | 0.107669 | TRUE  | 2.626308 | FALSE |                        |
| GTCTCACC db/db1 | db/db | 787  | 0.022455 | FALSE | 0.39292  | FALSE | Photoreceptor          |
| GTCTCACC db/db1 | db/db | 3159 | 0.018088 | FALSE | 1.148264 | FALSE | Photoreceptor          |
| GTCTCACC db/db1 | db/db | 1596 | 0.025868 | FALSE | 1.398216 | FALSE | Endothelia Capillary E |
| GTCTCACC db/db1 | db/db | 4113 | 0.010614 | FALSE | 0.812447 | FALSE | Endothelia EC-C4       |
| GTCTCACT db/db1 | db/db | 584  | 0.018088 | FALSE | 1.983522 | FALSE | Endothelia Capillary E |
| GTCTCACT db/db1 | db/db | 512  | 0.088776 | FALSE | 17.88512 | TRUE  |                        |
| GTCTCACT db/db1 | db/db | 1502 | 0.048732 | FALSE | 0.996114 | FALSE | Photoreceptor          |
| GTCTGTCA db/db1 | db/db | 1018 | 0.058205 | FALSE | 1.407161 | FALSE | Photoreceptor          |
| GTCTGTCA db/db1 | db/db | 2955 | 0.036232 | FALSE | 1.468529 | FALSE | Neuron                 |
| GTCTGTCA db/db1 | db/db | 4273 | 0.036232 | FALSE | 0.992526 | FALSE | Photoreceptor          |
| GTCTGTCA db/db1 | db/db | 6330 | 0.265464 | TRUE  | 1.673533 | FALSE |                        |
| GTCTGTCC db/db1 | db/db | 8914 | 0.098234 | FALSE | 0.633187 | FALSE | Photoreceptor          |
| GTCTGTCT db/db1 | db/db | 2708 | 0.044326 | FALSE | 0.875094 | FALSE | Photoreceptor          |
| GTCTTTAA db/db1 | db/db | 3422 | 0.013074 | FALSE | 0.870804 | FALSE | Endothelia EC-C4       |
| GTCTTTAA db/db1 | db/db | 1897 | 0.025868 | FALSE | 1.151835 | FALSE | Endothelia Venous EC   |
| GTCTTTAA db/db1 | db/db | 783  | 0.04192  | FALSE | 0.889141 | FALSE | Photoreceptor          |
| GTCTTTAC db/db1 | db/db | 2174 | 0.014151 | FALSE | 1.167641 | FALSE | Endothelia Venous EC   |
| GTCTTTAC db/db1 | db/db | 398  | 0.023682 | FALSE | 3.489038 | FALSE | Photoreceptor          |
| GTCTTTAC db/db1 | db/db | 1594 | 0.015287 | FALSE | 1.539016 | FALSE | Photoreceptor          |
| GTGACGC db/db1  | db/db | 2439 | 0.038953 | FALSE | 1.130175 | FALSE | Photoreceptor          |
| GTGACGC db/db1  | db/db | 8485 | 0.011081 | FALSE | 0.369617 | FALSE | Photoreceptor          |
| GTGACGC db/db1  | db/db | 4724 | 0.106408 | TRUE  | 1.501118 | FALSE |                        |
| GTGACGC db/db1  | db/db | 1168 | 0.192271 | TRUE  | 4.616805 | FALSE |                        |
| GTGACGC db/db1  | db/db | 3851 | 0.035586 | FALSE | 0.890225 | FALSE | Photoreceptor          |
| GTGACGC db/db1  | db/db | 3712 | 0.041154 | FALSE | 0.83809  | FALSE | Photoreceptor          |
| GTGACGC db/db1  | db/db | 854  | 0.018422 | FALSE | 1.734054 | FALSE | Endothelia Capillary E |
| GTGACGC db/db1  | db/db | 3700 | 0.036232 | FALSE | 0.83508  | FALSE | Endothelia Venous EC   |
| GTGAGCC db/db1  | db/db | 1062 | 0.038953 | FALSE | 1.539904 | FALSE | Photoreceptor          |
| GTGAGCC db/db1  | db/db | 1631 | 0.013338 | FALSE | 2.764939 | FALSE | Muller cell            |
| GTGAGCC db/db1  | db/db | 403  | 0.24     | TRUE  | 2.539063 | FALSE |                        |
| GTGAGCC db/db1  | db/db | 2222 | 0.028754 | FALSE | 1.467698 | FALSE | Endothelia Aterial EC  |
| GTGAGCC db/db1  | db/db | 5701 | 0.029266 | FALSE | 0.61879  | FALSE | Photoreceptor          |
| GTGAGCC db/db1  | db/db | 2645 | 0.017434 | FALSE | 1.148639 | FALSE | Endothelia Venous EC   |
| GTGAGCC db/db1  | db/db | 2904 | 0.011805 | FALSE | 0.960087 | FALSE | Endothelia Capillary E |
| GTGAGCC db/db1  | db/db | 2221 | 0.005782 | FALSE | 0.852398 | FALSE | Neuron                 |
| GTGAGCC db/db1  | db/db | 1100 | 0.016181 | FALSE | 1.093704 | FALSE | Photoreceptor          |
| GTGAGCC db/db1  | db/db | 1141 | 0.021286 | FALSE | 1.670789 | FALSE | Endothelia Capillary E |
| GTGAGCC db/db1  | db/db | 1124 | 0.075259 | FALSE | 12.81523 | TRUE  |                        |
| GTGAGGA db/db1  | db/db | 2608 | 0.022059 | FALSE | 1.060261 | FALSE | Endothelia Capillary E |
| GTGAGGA db/db1  | db/db | 1743 | 0.048732 | FALSE | 2.177725 | FALSE | Endothelia Venous EC   |

|                |       |      |          |       |          |       |                        |
|----------------|-------|------|----------|-------|----------|-------|------------------------|
| GTGAGGA db/db1 | db/db | 8716 | 0.014711 | FALSE | 0.575204 | FALSE | Photoreceptor          |
| GTGAGGA db/db1 | db/db | 568  | 0.024534 | FALSE | 3.311064 | FALSE | Photoreceptor          |
| GTGAGGA db/db1 | db/db | 2445 | 0.100845 | TRUE  | 1.473234 | FALSE |                        |
| GTGAGGA db/db1 | db/db | 3277 | 0.031411 | FALSE | 1.073276 | FALSE | Photoreceptor          |
| GTGAGGA db/db1 | db/db | 1458 | 0.04192  | FALSE | 1.130251 | FALSE | Photoreceptor          |
| GTGAGGA db/db1 | db/db | 604  | 0.065957 | FALSE | 2.130396 | FALSE | Photoreceptor          |
| GTGAGGA db/db1 | db/db | 5222 | 0.039671 | FALSE | 0.814551 | FALSE | Photoreceptor          |
| GTGAGGA db/db1 | db/db | 8096 | 0.018088 | FALSE | 0.716624 | FALSE | Photoreceptor          |
| GTGAGTT db/db1 | db/db | 1870 | 0.101906 | TRUE  | 1.444471 | FALSE |                        |
| GTGAGTT db/db1 | db/db | 4333 | 0.016799 | FALSE | 0.205731 | FALSE | Photoreceptor          |
| GTGAGTT db/db1 | db/db | 7294 | 0.019106 | FALSE | 0.661565 | FALSE | Photoreceptor          |
| GTGAGTT db/db1 | db/db | 1192 | 0.027758 | FALSE | 0.727798 | FALSE | Photoreceptor          |
| GTGAGTT db/db1 | db/db | 2353 | 0.026796 | FALSE | 1.254177 | FALSE | Endothelia Aterial EC  |
| GTGATGT db/db1 | db/db | 751  | 0.034954 | FALSE | 1.392177 | FALSE | Endothelia EC-C4       |
| GTGATGT db/db1 | db/db | 6837 | 0.024971 | FALSE | 0.671077 | FALSE | Photoreceptor          |
| GTGATGT db/db1 | db/db | 1204 | 0.022857 | FALSE | 0.289977 | FALSE | Photoreceptor          |
| GTGATGT db/db1 | db/db | 923  | 0.073582 | FALSE | 1.307799 | FALSE | Photoreceptor          |
| GTGATGT db/db1 | db/db | 1762 | 0.017114 | FALSE | 1.444739 | FALSE | Endothelia Capillary E |
| GTGATGT db/db1 | db/db | 2702 | 0.022455 | FALSE | 0.881856 | FALSE | Endothelia Aterial EC  |
| GTGATGT db/db1 | db/db | 3112 | 0.032546 | FALSE | 1.215832 | FALSE | Photoreceptor          |
| GTGATGT db/db1 | db/db | 1407 | 0.024534 | FALSE | 1.132876 | FALSE | Endothelia Capillary E |
| GTGATGT db/db1 | db/db | 709  | 0.037564 | FALSE | 1.744881 | FALSE | Photoreceptor          |
| GTGATGT db/db1 | db/db | 1759 | 0.021669 | FALSE | 0.917068 | FALSE | Endothelia EC-C4       |
| GTGCACG db/db1 | db/db | 3886 | 0.17103  | TRUE  | 2.536575 | FALSE |                        |
| GTGCACG db/db1 | db/db | 1065 | 0.035586 | FALSE | 1.096967 | FALSE | Photoreceptor          |
| GTGCACG db/db1 | db/db | 5389 | 0.143501 | TRUE  | 2.742326 | FALSE |                        |
| GTGCACG db/db1 | db/db | 4586 | 0.028754 | FALSE | 0.803375 | FALSE | Photoreceptor          |
| GTGCACG db/db1 | db/db | 491  | 0.10692  | TRUE  | 1.76     | FALSE |                        |
| GTGCACG db/db1 | db/db | 591  | 0.024534 | FALSE | 2.881448 | FALSE | Muller cell            |
| GTGCACG db/db1 | db/db | 4064 | 0.038251 | FALSE | 1.038236 | FALSE | Photoreceptor          |
| GTGCACG db/db1 | db/db | 8066 | 0.015581 | FALSE | 0.217948 | FALSE | Photoreceptor          |
| GTGCACG db/db1 | db/db | 1842 | 0.012557 | FALSE | 1.157734 | FALSE | Endothelia Aterial EC  |
| GTGCACG db/db1 | db/db | 4125 | 0.014151 | FALSE | 0.92568  | FALSE | Endothelia Venous EC   |
| GTGCACG db/db1 | db/db | 3205 | 0.031411 | FALSE | 1.226796 | FALSE | Endothelia Venous EC   |
| GTGCACG db/db1 | db/db | 364  | 0.059406 | FALSE | 4.192736 | FALSE | Photoreceptor          |
| GTGCACG db/db1 | db/db | 2616 | 0.01981  | FALSE | 0.781722 | FALSE | Photoreceptor          |
| GTGCACG db/db1 | db/db | 3661 | 0.025416 | FALSE | 0.758197 | FALSE | Photoreceptor          |
| GTGCACG db/db1 | db/db | 3449 | 0.05065  | FALSE | 0.984495 | FALSE | Endothelia Venous EC   |
| GTGCACG db/db1 | db/db | 2079 | 0.031411 | FALSE | 1.234163 | FALSE | Endothelia Capillary E |
| GTGCACG db/db1 | db/db | 7294 | 0.013338 | FALSE | 0.732608 | FALSE | Photoreceptor          |
| GTGCAGC db/db1 | db/db | 414  | 0.043505 | FALSE | 2.526142 | FALSE | Endothelia Capillary E |
| GTGCAGC db/db1 | db/db | 407  | 0.064568 | FALSE | 2.4927   | FALSE | Endothelia Capillary E |
| GTGCAGC db/db1 | db/db | 728  | 0.052669 | FALSE | 3.174415 | FALSE | Muller cell            |
| GTGCAGC db/db1 | db/db | 1326 | 0.023266 | FALSE | 1.420036 | FALSE | Endothelia Capillary E |
| GTGCAGC db/db1 | db/db | 659  | 0.130374 | TRUE  | 3.858521 | FALSE |                        |
| GTGCAGC db/db1 | db/db | 735  | 0.078788 | FALSE | 1.729233 | FALSE | Photoreceptor          |
| GTGCAGC db/db1 | db/db | 772  | 0.039671 | FALSE | 1.539015 | FALSE | Photoreceptor          |

|          |        |       |      |          |       |          |       |                        |
|----------|--------|-------|------|----------|-------|----------|-------|------------------------|
| GTGCAGC  | db/db1 | db/db | 2188 | 0.038251 | FALSE | 1.262954 | FALSE | Photoreceptor          |
| GTGCGTG  | db/db1 | db/db | 650  | 0.030318 | FALSE | 0.620965 | FALSE | Photoreceptor          |
| GTGCGTG  | db/db1 | db/db | 7374 | 0.013074 | FALSE | 0.128992 | FALSE | Photoreceptor          |
| GTGCGTG  | db/db1 | db/db | 3001 | 0.045165 | FALSE | 1.260527 | FALSE | Endothelia Venous EC   |
| GTGCGTG  | db/db1 | db/db | 3379 | 0.015287 | FALSE | 0.784235 | FALSE | Photoreceptor          |
| GTGCGTG  | db/db1 | db/db | 436  | 0.061912 | FALSE | 2.550791 | FALSE | Photoreceptor          |
| GTGCGTG  | db/db1 | db/db | 5357 | 0.024105 | FALSE | 0.97928  | FALSE | Endothelia EC-C4       |
| GTGCGTG  | db/db1 | db/db | 6767 | 0.015879 | FALSE | 0.778993 | FALSE | Photoreceptor          |
| GTGCGTG  | db/db1 | db/db | 3714 | 0.024971 | FALSE | 0.90416  | FALSE | Photoreceptor          |
| GTGCGTG  | db/db1 | db/db | 966  | 0.016181 | FALSE | 1.281824 | FALSE | Endothelia Capillary E |
| GTGCGTG  | db/db1 | db/db | 1598 | 0.012052 | FALSE | 0.8002   | FALSE | Endothelia EC-C4       |
| GTGCGTG  | db/db1 | db/db | 504  | 0.031973 | FALSE | 3.581094 | FALSE | Muller cell            |
| GTGCGTG  | db/db1 | db/db | 1538 | 0.007636 | FALSE | 1.314277 | FALSE | Neuron                 |
| GTGCGTG  | db/db1 | db/db | 411  | 0.138889 | TRUE  | 8.122744 | TRUE  |                        |
| GTGCTGG  | db/db1 | db/db | 2036 | 0.016488 | FALSE | 0.60714  | FALSE | Photoreceptor          |
| GTGCTGG  | db/db1 | db/db | 1355 | 0.126958 | TRUE  | 1.056938 | FALSE |                        |
| GTGCTGG  | db/db1 | db/db | 2676 | 0.017114 | FALSE | 0.835191 | FALSE | Endothelia EC-C4       |
| GTGCTGG  | db/db1 | db/db | 561  | 0.016181 | FALSE | 1.884325 | FALSE | Photoreceptor          |
| GTGCTGG  | db/db1 | db/db | 575  | 0.036891 | FALSE | 0.798261 | FALSE | Photoreceptor          |
| GTGCTGG  | db/db1 | db/db | 2657 | 0.013876 | FALSE | 1.150183 | FALSE | Endothelia Venous EC   |
| GTGCTGG  | db/db1 | db/db | 4299 | 0.012303 | FALSE | 0.835265 | FALSE | Endothelia Venous EC   |
| GTGCTGG  | db/db1 | db/db | 3237 | 0.061912 | FALSE | 1.363865 | FALSE | Photoreceptor          |
| GTGCTGG  | db/db1 | db/db | 4442 | 0.018422 | FALSE | 0.813781 | FALSE | Photoreceptor          |
| GTGCTGG  | db/db1 | db/db | 546  | 0.058205 | FALSE | 2.328121 | FALSE | Muller cell            |
| GTGCTTCA | db/db1 | db/db | 523  | 0.020536 | FALSE | 3.646265 | FALSE | Muller cell            |
| GTGCTTCC | db/db1 | db/db | 3754 | 0.055901 | FALSE | 0.734646 | FALSE | Endothelia EC-C4       |
| GTGCTTCC | db/db1 | db/db | 7256 | 0.020536 | FALSE | 0.808771 | FALSE | Photoreceptor          |
| GTGCTTCC | db/db1 | db/db | 1611 | 0.039671 | FALSE | 0.908933 | FALSE | Photoreceptor          |
| GTGCTTCC | db/db1 | db/db | 2747 | 0.028754 | FALSE | 0.785737 | FALSE | Photoreceptor          |
| GTGCTTCC | db/db1 | db/db | 2691 | 0.037564 | FALSE | 0.646987 | FALSE | Photoreceptor          |
| GTGCTTCC | db/db1 | db/db | 704  | 0.024971 | FALSE | 2.474362 | FALSE | Muller cell            |
| GTGCTTCC | db/db1 | db/db | 2144 | 0.021286 | FALSE | 0.547335 | FALSE | Photoreceptor          |
| GTGCTTCT | db/db1 | db/db | 1056 | 0.021286 | FALSE | 2.034904 | FALSE | Endothelia Capillary E |
| GTGCTTCT | db/db1 | db/db | 4222 | 0.025416 | FALSE | 0.825531 | FALSE | Endothelia EC-C4       |
| GTGCTTCT | db/db1 | db/db | 316  | 0.076994 | FALSE | 35.7016  | TRUE  |                        |
| GTGGAAG  | db/db1 | db/db | 3562 | 0.012052 | FALSE | 1.006676 | FALSE | Photoreceptor          |
| GTGGAAG  | db/db1 | db/db | 2759 | 0.029266 | FALSE | 1.575146 | FALSE | Endothelia Venous EC   |
| GTGGAAG  | db/db1 | db/db | 451  | 0.015581 | FALSE | 1.290899 | FALSE | Photoreceptor          |
| GTGGAAG  | db/db1 | db/db | 3680 | 0.026796 | FALSE | 0.444208 | FALSE | Photoreceptor          |
| GTGGAAG  | db/db1 | db/db | 339  | 0.041154 | FALSE | 3.698323 | FALSE | Pericyte               |
| GTGGAAG  | db/db1 | db/db | 385  | 0.021286 | FALSE | 1.57405  | FALSE | Photoreceptor          |
| GTGGAAG  | db/db1 | db/db | 1925 | 0.020171 | FALSE | 1.573948 | FALSE | Endothelia Capillary E |
| GTGGAAG  | db/db1 | db/db | 793  | 0.05065  | FALSE | 1.090109 | FALSE | Photoreceptor          |
| GTGGAGA  | db/db1 | db/db | 2652 | 0.015581 | FALSE | 1.11236  | FALSE | Photoreceptor          |
| GTGGAGA  | db/db1 | db/db | 1434 | 0.063221 | FALSE | 1.272261 | FALSE | Endothelia Capillary E |
| GTGGAGA  | db/db1 | db/db | 2135 | 0.024534 | FALSE | 1.243701 | FALSE | Endothelia Capillary E |
| GTGGAGA  | db/db1 | db/db | 535  | 0.063221 | FALSE | 12.08791 | TRUE  |                        |

|                 |       |      |          |       |          |       |                        |
|-----------------|-------|------|----------|-------|----------|-------|------------------------|
| GTGGAGA db/db1  | db/db | 528  | 0.051646 | FALSE | 2.247881 | FALSE | Muller cell            |
| GTGGAGA db/db1  | db/db | 1556 | 0.102807 | TRUE  | 0.775194 | FALSE |                        |
| GTGGAGA db/db1  | db/db | 605  | 0.091004 | FALSE | 3.402689 | FALSE | Neuron                 |
| GTGGCGT db/db1  | db/db | 1729 | 0.015879 | FALSE | 0.595133 | FALSE | Photoreceptor          |
| GTGGCGT db/db1  | db/db | 459  | 0.143501 | TRUE  | 9.090909 | TRUE  |                        |
| GTGGCGT db/db1  | db/db | 1395 | 0.021669 | FALSE | 1.34421  | FALSE | Endothelia Capillary E |
| GTGGCGT db/db1  | db/db | 2651 | 0.064568 | FALSE | 1.161725 | FALSE | Endothelia Venous EC   |
| GTGGCGT db/db1  | db/db | 2766 | 0.071958 | FALSE | 5.310683 | TRUE  |                        |
| GTGGCGT db/db1  | db/db | 1215 | 0.023266 | FALSE | 3.676228 | FALSE | Muller cell            |
| GTGGGAA db/db1  | db/db | 3821 | 0.019455 | FALSE | 0.882155 | FALSE | Endothelia Venous EC   |
| GTGGGAA db/db1  | db/db | 1203 | 0.011319 | FALSE | 1.385775 | FALSE | Endothelia Capillary E |
| GTGGGAA db/db1  | db/db | 3244 | 0.068864 | FALSE | 1.506635 | FALSE | Photoreceptor          |
| GTGGGAA db/db1  | db/db | 2777 | 0.030859 | FALSE | 0.846179 | FALSE | Photoreceptor          |
| GTGGGAA db/db1  | db/db | 1024 | 0.043505 | FALSE | 0.954221 | FALSE | Photoreceptor          |
| GTGGGAA db/db1  | db/db | 2265 | 0.052669 | FALSE | 1.053497 | FALSE | Neuron                 |
| GTGGGAA db/db1  | db/db | 931  | 0.032546 | FALSE | 2.410334 | FALSE | Photoreceptor          |
| GTGGGAA db/db1  | db/db | 2354 | 0.036891 | FALSE | 0.52672  | FALSE | Photoreceptor          |
| GTGGGAA db/db1  | db/db | 5738 | 0.036891 | FALSE | 1.098941 | FALSE | Photoreceptor          |
| GTGGGAA db/db1  | db/db | 1103 | 0.011319 | FALSE | 1.149593 | FALSE | Photoreceptor          |
| GTGGGAA db/db1  | db/db | 1283 | 0.03313  | FALSE | 2.189692 | FALSE | Muller cell            |
| GTGGTTA db/db1  | db/db | 1130 | 0.007441 | FALSE | 1.673799 | FALSE | Endothelia Capillary E |
| GTGGTTA db/db1  | db/db | 691  | 0.04192  | FALSE | 1.048337 | FALSE | Photoreceptor          |
| GTGGTTA db/db1  | db/db | 3906 | 0.064568 | FALSE | 1.31805  | FALSE | Photoreceptor          |
| GTGGTTA db/db1  | db/db | 478  | 0.027758 | FALSE | 2.256048 | FALSE | Microglia              |
| GTGGTTA db/db1  | db/db | 3407 | 0.014151 | FALSE | 0.929858 | FALSE | Endothelia Aterial EC  |
| GTGGTTA db/db1  | db/db | 848  | 0.018422 | FALSE | 0.54771  | FALSE | Photoreceptor          |
| GTGGTTA db/db1  | db/db | 929  | 0.007833 | FALSE | 1.009211 | FALSE | Endothelia Capillary E |
| GTGGTTA db/db1  | db/db | 2772 | 0.011561 | FALSE | 0.927466 | FALSE | Endothelia Capillary E |
| GTGGTTA db/db1  | db/db | 2265 | 0.033726 | FALSE | 1.065783 | FALSE | Endothelia Venous EC   |
| GTGGTTA db/db1  | db/db | 1283 | 0.012303 | FALSE | 1.314815 | FALSE | Endothelia Capillary E |
| GTGGTTA db/db1  | db/db | 3369 | 0.030859 | FALSE | 1.258769 | FALSE | Endothelia Capillary E |
| GTGTAAC db/db1  | db/db | 7591 | 0.012557 | FALSE | 0.509996 | FALSE | Photoreceptor          |
| GTGTAAC db/db1  | db/db | 3227 | 0.010846 | FALSE | 0.774502 | FALSE | Endothelia EC-C4       |
| GTGTAAC db/db1  | db/db | 6583 | 0.020171 | FALSE | 0.779115 | FALSE | Photoreceptor          |
| GTGTAAC db/db1  | db/db | 654  | 0.03313  | FALSE | 0.966916 | FALSE | Photoreceptor          |
| GTGTAAC db/db1  | db/db | 1259 | 0.024534 | FALSE | 1.572231 | FALSE | Endothelia Aterial EC  |
| GTGTAAC db/db1  | db/db | 6650 | 0.025868 | FALSE | 0.886354 | FALSE | Photoreceptor          |
| GTGTAAC db/db1  | db/db | 6858 | 0.485327 | TRUE  | 0.901258 | FALSE |                        |
| GTGTAAC db/db1  | db/db | 1724 | 0.020536 | FALSE | 1.347347 | FALSE | Endothelia Capillary E |
| GTGTAAC db/db1  | db/db | 943  | 0.070386 | FALSE | 6.435286 | TRUE  |                        |
| GTGTCCTA db/db1 | db/db | 879  | 0.016181 | FALSE | 0.504898 | FALSE | Photoreceptor          |
| GTGTCCTA db/db1 | db/db | 1943 | 0.082569 | FALSE | 1.157411 | FALSE | Photoreceptor          |
| GTGTCCTA db/db1 | db/db | 1533 | 0.038251 | FALSE | 1.616349 | FALSE | Endothelia Capillary E |
| GTGTCCTA db/db1 | db/db | 5073 | 0.031411 | FALSE | 0.813033 | FALSE | Photoreceptor          |
| GTGTCCTA db/db1 | db/db | 1167 | 0.068864 | FALSE | 1.64764  | FALSE | Photoreceptor          |
| GTGTCCTC db/db1 | db/db | 961  | 0.057037 | FALSE | 1.551521 | FALSE | Photoreceptor          |
| GTGTCCTC db/db1 | db/db | 5957 | 0.027758 | FALSE | 0.682594 | FALSE | Photoreceptor          |



|                  |       |      |          |       |          |       |                        |
|------------------|-------|------|----------|-------|----------|-------|------------------------|
| GTGTCCTC db/db1  | db/db | 506  | 0.24     | TRUE  | 13.04945 | TRUE  |                        |
| GTGTCCTC db/db1  | db/db | 693  | 0.143501 | TRUE  | 13.68821 | TRUE  |                        |
| GTGTCCTT db/db1  | db/db | 1402 | 0.043505 | FALSE | 1.91912  | FALSE | Endothelia Capillary E |
| GTGTCCTT db/db1  | db/db | 6194 | 0.143501 | TRUE  | 1.722818 | FALSE |                        |
| GTGTCCTT db/db1  | db/db | 1813 | 0.030318 | FALSE | 1.294658 | FALSE | Endothelia Venous EC   |
| GTGTCCTT db/db1  | db/db | 3799 | 0.014151 | FALSE | 0.940526 | FALSE | Endothelia Venous EC   |
| GTGTCCTT db/db1  | db/db | 2317 | 0.053718 | FALSE | 0.950535 | FALSE | Endothelia Venous EC   |
| GTGTCCTT db/db1  | db/db | 1184 | 0.119124 | TRUE  | 4.241782 | FALSE |                        |
| GTGTCCTT db/db1  | db/db | 5202 | 0.043505 | FALSE | 0.937686 | FALSE | Endothelia EC-C4       |
| GTGTGATC db/db1  | db/db | 4146 | 0.025868 | FALSE | 0.829468 | FALSE | Photoreceptor          |
| GTGTGATC db/db1  | db/db | 483  | 0.018422 | FALSE | 2.970205 | FALSE | Photoreceptor          |
| GTGTGATC db/db1  | db/db | 1938 | 0.031411 | FALSE | 1.307149 | FALSE | Endothelia Capillary E |
| GTGTGATC db/db1  | db/db | 780  | 0.058205 | FALSE | 1.975759 | FALSE | Muller cell            |
| GTGTGATC db/db1  | db/db | 2418 | 0.029787 | FALSE | 1.139834 | FALSE | Endothelia Capillary E |
| GTGTGATC db/db1  | db/db | 569  | 0.026328 | FALSE | 2.821409 | FALSE | Endothelia Capillary E |
| GTGTGGC db/db1   | db/db | 585  | 0.057037 | FALSE | 1.178381 | FALSE | Photoreceptor          |
| GTGTGGC db/db1   | db/db | 504  | 0.014429 | FALSE | 1.933499 | FALSE | Endothelia Capillary E |
| GTGTGGC db/db1   | db/db | 696  | 0.159016 | TRUE  | 6.969697 | TRUE  |                        |
| GTGTGGC db/db1   | db/db | 2005 | 0.028754 | FALSE | 0.837225 | FALSE | Microglia              |
| GTGTGGC db/db1   | db/db | 2382 | 0.037564 | FALSE | 1.1843   | FALSE | Endothelia Capillary E |
| GTGTGGC db/db1   | db/db | 1369 | 0.046025 | FALSE | 1.343963 | FALSE | Photoreceptor          |
| GTGTGGC db/db1   | db/db | 6162 | 0.049679 | FALSE | 0.727367 | FALSE | Photoreceptor          |
| GTGTTAG db/db1   | db/db | 768  | 0.015581 | FALSE | 1.118201 | FALSE | Endothelia Capillary E |
| GTGTTAG db/db1   | db/db | 1961 | 0.009933 | FALSE | 1.132022 | FALSE | Photoreceptor          |
| GTGTTAG db/db1   | db/db | 2067 | 0.033726 | FALSE | 1.168993 | FALSE | Photoreceptor          |
| GTGTTAG db/db1   | db/db | 2803 | 0.039671 | FALSE | 0.985355 | FALSE | Photoreceptor          |
| GTGTTAG db/db1   | db/db | 8279 | 0.014151 | FALSE | 0.285847 | FALSE | Photoreceptor          |
| GTGTTAG db/db1   | db/db | 2558 | 0.058205 | FALSE | 1.23643  | FALSE | Endothelia Venous EC   |
| GTGTTAG db/db1   | db/db | 1755 | 0.018088 | FALSE | 1.349548 | FALSE | Endothelia Capillary E |
| GTGTTAG db/db1   | db/db | 957  | 0.064568 | FALSE | 2.111902 | FALSE | Photoreceptor          |
| GTGTTCCA db/db1  | db/db | 478  | 0.058205 | FALSE | 1.470255 | FALSE | Photoreceptor          |
| GTGTTCCA db/db1  | db/db | 1519 | 0.068864 | FALSE | 1.011276 | FALSE | Photoreceptor          |
| GTGTTCCC db/db1  | db/db | 5345 | 0.032546 | FALSE | 0.937901 | FALSE | Photoreceptor          |
| GTGTTCCC db/db1  | db/db | 3506 | 0.013074 | FALSE | 0.925764 | FALSE | Endothelia Venous EC   |
| GTGTTCCC db/db1  | db/db | 2718 | 0.08663  | FALSE | 0.96746  | FALSE | Photoreceptor          |
| GTGTTCCG db/db1  | db/db | 7328 | 0.411992 | TRUE  | 1.621083 | FALSE |                        |
| GTGTTCCG db/db1  | db/db | 2679 | 0.071958 | FALSE | 1.171713 | FALSE | Photoreceptor          |
| GTGTTCCG db/db1  | db/db | 2065 | 0.107669 | TRUE  | 2.218189 | FALSE |                        |
| GTGTTCCCT db/db1 | db/db | 918  | 0.019106 | FALSE | 1.009914 | FALSE | Endothelia Aterial EC  |
| GTGTTCCCT db/db1 | db/db | 1637 | 0.008234 | FALSE | 0.949203 | FALSE | Endothelia Capillary E |
| GTTACAG db/db1   | db/db | 2878 | 0.05065  | FALSE | 1.089045 | FALSE | Neuron                 |
| GTTACAG db/db1   | db/db | 513  | 0.093319 | FALSE | 2.998153 | FALSE | Photoreceptor          |
| GTTACAG db/db1   | db/db | 4077 | 0.023682 | FALSE | 0.654898 | FALSE | Photoreceptor          |
| GTTACAG db/db1   | db/db | 5089 | 0.027758 | FALSE | 0.749831 | FALSE | Endothelia EC-C4       |
| GTTACAG db/db1   | db/db | 1167 | 0.014997 | FALSE | 0.952448 | FALSE | Endothelia Capillary E |
| GTTACAG db/db1   | db/db | 4081 | 0.016799 | FALSE | 0.764522 | FALSE | Endothelia Venous EC   |
| GTTACAG db/db1   | db/db | 4401 | 0.019455 | FALSE | 0.853652 | FALSE | Endothelia Venous EC   |

|                 |       |      |          |       |          |       |                        |
|-----------------|-------|------|----------|-------|----------|-------|------------------------|
| GTTACAGC db/db1 | db/db | 2040 | 0.082569 | FALSE | 1.06822  | FALSE | Photoreceptor          |
| GTTACAGC db/db1 | db/db | 2667 | 0.031411 | FALSE | 1.277547 | FALSE | Endothelia Aterial EC  |
| GTTACAGT db/db1 | db/db | 5875 | 0.021286 | FALSE | 0.807004 | FALSE | Photoreceptor          |
| GTTACAGT db/db1 | db/db | 2037 | 0.033726 | FALSE | 1.33435  | FALSE | Endothelia Aterial EC  |
| GTTACAGT db/db1 | db/db | 4313 | 0.028251 | FALSE | 0.725004 | FALSE | Photoreceptor          |
| GTTACAGT db/db1 | db/db | 3539 | 0.055901 | FALSE | 0.873758 | FALSE | Endothelia Venous EC   |
| GTTACCCA db/db1 | db/db | 831  | 0.115723 | TRUE  | 8.123953 | TRUE  |                        |
| GTTACCCA db/db1 | db/db | 879  | 0.026796 | FALSE | 0.379053 | FALSE | Photoreceptor          |
| GTTACCCC db/db1 | db/db | 1549 | 0.016488 | FALSE | 0.58072  | FALSE | Photoreceptor          |
| GTTACCCC db/db1 | db/db | 6084 | 0.018761 | FALSE | 0.636405 | FALSE | Photoreceptor          |
| GTTACCCC db/db1 | db/db | 1797 | 0.051646 | FALSE | 1.572424 | FALSE | Photoreceptor          |
| GTTACCCC db/db1 | db/db | 2036 | 0.016799 | FALSE | 1.385213 | FALSE | Endothelia EC-C4       |
| GTTACCCC db/db1 | db/db | 914  | 0.048732 | FALSE | 1.241723 | FALSE | Photoreceptor          |
| GTTACCCT db/db1 | db/db | 3312 | 0.064568 | FALSE | 1.186285 | FALSE | Endothelia Venous EC   |
| GTTACCCT db/db1 | db/db | 1035 | 0.029266 | FALSE | 2.093687 | FALSE | Photoreceptor          |
| GTTACCCT db/db1 | db/db | 3744 | 0.046906 | FALSE | 0.93032  | FALSE | Endothelia Venous EC   |
| GTTACGA/ db/db1 | db/db | 939  | 0.033726 | FALSE | 3.1647   | FALSE | Muller cell            |
| GTTACGA/ db/db1 | db/db | 850  | 0.040404 | FALSE | 2.03726  | FALSE | Endothelia Capillary E |
| GTTACGAC db/db1 | db/db | 1966 | 0.053718 | FALSE | 0.834024 | FALSE | Photoreceptor          |
| GTTACGAC db/db1 | db/db | 391  | 0.040404 | FALSE | 1.643195 | FALSE | Photoreceptor          |
| GTTACGAC db/db1 | db/db | 750  | 0.052669 | FALSE | 1.407914 | FALSE | Photoreceptor          |
| GTTACGAC db/db1 | db/db | 2595 | 0.150727 | TRUE  | 1.063937 | FALSE |                        |
| GTTAGAC/ db/db1 | db/db | 6865 | 0.015879 | FALSE | 0.50416  | FALSE | Photoreceptor          |
| GTTAGAC/ db/db1 | db/db | 704  | 0.057037 | FALSE | 1.622611 | FALSE | Photoreceptor          |
| GTTAGACC db/db1 | db/db | 532  | 0.076994 | FALSE | 16.76942 | TRUE  |                        |
| GTTAGACC db/db1 | db/db | 2346 | 0.080645 | FALSE | 1.064476 | FALSE | Microglia              |
| GTTAGACT db/db1 | db/db | 1121 | 0.061912 | FALSE | 1.592491 | FALSE | Muller cell            |
| GTTAGACT db/db1 | db/db | 2636 | 0.036891 | FALSE | 0.881951 | FALSE | Photoreceptor          |
| GTTAGACT db/db1 | db/db | 1810 | 0.03313  | FALSE | 1.030958 | FALSE | Endothelia Capillary E |
| GTTAGTG/ db/db1 | db/db | 395  | 0.119124 | TRUE  | 13.99254 | TRUE  |                        |
| GTTAGTG/ db/db1 | db/db | 3161 | 0.020536 | FALSE | 0.828826 | FALSE | Photoreceptor          |
| GTTAGTG/ db/db1 | db/db | 658  | 0.028754 | FALSE | 0.891698 | FALSE | Photoreceptor          |
| GTTAGTG/ db/db1 | db/db | 905  | 0.095727 | FALSE | 5.30914  | TRUE  |                        |
| GTTAGTG/ db/db1 | db/db | 813  | 0.027273 | FALSE | 2.454876 | FALSE | Photoreceptor          |
| GTTATGG/ db/db1 | db/db | 584  | 0.040404 | FALSE | 34.89474 | TRUE  |                        |
| GTTATGG/ db/db1 | db/db | 3518 | 0.021669 | FALSE | 0.985038 | FALSE | Endothelia Venous EC   |
| GTTATGG/ db/db1 | db/db | 5142 | 0.280108 | TRUE  | 1.715397 | FALSE |                        |
| GTTATGG/ db/db1 | db/db | 788  | 0.017758 | FALSE | 1.308629 | FALSE | Photoreceptor          |
| GTTATGG/ db/db1 | db/db | 3559 | 0.031411 | FALSE | 1.144786 | FALSE | Photoreceptor          |
| GTTCATTA db/db1 | db/db | 1341 | 0.020171 | FALSE | 1.823553 | FALSE | Endothelia Capillary E |
| GTTCATTA db/db1 | db/db | 419  | 0.047807 | FALSE | 0.952211 | FALSE | Endothelia Capillary E |
| GTTCATTA db/db1 | db/db | 2209 | 0.015287 | FALSE | 0.937622 | FALSE | Endothelia Capillary E |
| GTTCATTA db/db1 | db/db | 1794 | 0.106408 | TRUE  | 6.081081 | TRUE  |                        |
| GTTCATTC db/db1 | db/db | 489  | 0.080645 | FALSE | 12.85552 | TRUE  |                        |
| GTTCATTG db/db1 | db/db | 1136 | 0.061912 | FALSE | 1.509534 | FALSE | Photoreceptor          |
| GTTCATTG db/db1 | db/db | 1920 | 0.030318 | FALSE | 1.019217 | FALSE | Photoreceptor          |
| GTTCATTG db/db1 | db/db | 1466 | 0.060641 | FALSE | 1.42182  | FALSE | Photoreceptor          |

|          |        |       |      |          |       |          |       |                        |
|----------|--------|-------|------|----------|-------|----------|-------|------------------------|
| GTTCAATT | db/db1 | db/db | 6850 | 0.017114 | FALSE | 0.660779 | FALSE | Photoreceptor          |
| GTTCAATT | db/db1 | db/db | 2144 | 0.100845 | TRUE  | 4.221505 | FALSE |                        |
| GTTCAATT | db/db1 | db/db | 3138 | 0.334395 | TRUE  | 3.048152 | FALSE |                        |
| GTTCCGTA | db/db1 | db/db | 3299 | 0.030318 | FALSE | 0.84909  | FALSE | Photoreceptor          |
| GTTCCGTA | db/db1 | db/db | 1691 | 0.075259 | FALSE | 1.51867  | FALSE | Photoreceptor          |
| GTTCCGTC | db/db1 | db/db | 6010 | 0.119124 | TRUE  | 2.125641 | FALSE |                        |
| GTTCCGTC | db/db1 | db/db | 3159 | 0.070386 | FALSE | 6.328601 | TRUE  |                        |
| GTTCCGTC | db/db1 | db/db | 1956 | 0.018422 | FALSE | 0.918981 | FALSE | Photoreceptor          |
| GTTCCGTC | db/db1 | db/db | 3415 | 0.08663  | FALSE | 1.099587 | FALSE | Neuron                 |
| GTTCCGTC | db/db1 | db/db | 1721 | 0.080645 | FALSE | 1.145664 | FALSE | Photoreceptor          |
| GTTCCGTC | db/db1 | db/db | 1037 | 0.019455 | FALSE | 1.173906 | FALSE | Endothelia Capillary E |
| GTTCCGTC | db/db1 | db/db | 3130 | 0.17103  | TRUE  | 8.3227   | TRUE  |                        |
| GTTCCGTC | db/db1 | db/db | 3211 | 0.019106 | FALSE | 1.052552 | FALSE | Endothelia EC-C4       |
| GTTCCGTC | db/db1 | db/db | 884  | 0.048732 | FALSE | 1.498246 | FALSE | Photoreceptor          |
| GTTCCGTC | db/db1 | db/db | 5473 | 0.023682 | FALSE | 0.674617 | FALSE | Photoreceptor          |
| GTTCCGTT | db/db1 | db/db | 3129 | 0.030318 | FALSE | 0.933268 | FALSE | Photoreceptor          |
| GTTCCGTT | db/db1 | db/db | 4841 | 0.020908 | FALSE | 0.62418  | FALSE | Photoreceptor          |
| GTTCCGTT | db/db1 | db/db | 6546 | 0.022455 | FALSE | 0.55825  | FALSE | Photoreceptor          |
| GTTGCTC  | db/db1 | db/db | 489  | 0.052669 | FALSE | 1.005231 | FALSE | Photoreceptor          |
| GTTGCTC  | db/db1 | db/db | 1356 | 0.024105 | FALSE | 1.194723 | FALSE | Endothelia Capillary E |
| GTTGCTT  | db/db1 | db/db | 2372 | 0.03313  | FALSE | 1.133472 | FALSE | Endothelia Venous EC   |
| GTTGCTT  | db/db1 | db/db | 1181 | 0.265464 | TRUE  | 4.93763  | FALSE |                        |
| GTTCTATA | db/db1 | db/db | 1030 | 0.028251 | FALSE | 0.301839 | FALSE | Photoreceptor          |
| GTTCTATC | db/db1 | db/db | 254  | 0.039671 | FALSE | 61.84211 | TRUE  |                        |
| GTTCTATG | db/db1 | db/db | 5731 | 0.016488 | FALSE | 0.783576 | FALSE | Endothelia Venous EC   |
| GTTCTATT | db/db1 | db/db | 5900 | 0.036891 | FALSE | 0.584936 | FALSE | Photoreceptor          |
| GTTCTATT | db/db1 | db/db | 1661 | 0.08663  | FALSE | 17.00494 | TRUE  |                        |
| GTTCTATT | db/db1 | db/db | 2957 | 0.047807 | FALSE | 0.945084 | FALSE | Endothelia Venous EC   |
| GTTCTATT | db/db1 | db/db | 1535 | 0.007833 | FALSE | 0.868384 | FALSE | Endothelia Capillary E |
| GTTGAAC  | db/db1 | db/db | 859  | 0.045165 | FALSE | 1.869471 | FALSE | Photoreceptor          |
| GTTGAAC  | db/db1 | db/db | 2422 | 0.024971 | FALSE | 0.981121 | FALSE | Endothelia Venous EC   |
| GTTGAAC  | db/db1 | db/db | 3506 | 0.009277 | FALSE | 1.073366 | FALSE | Endothelia Capillary E |
| GTTGAAC  | db/db1 | db/db | 3301 | 0.055901 | FALSE | 1.292175 | FALSE | Photoreceptor          |
| GTTGAAC  | db/db1 | db/db | 1351 | 0.010846 | FALSE | 1.923846 | FALSE | Photoreceptor          |
| GTTGAAC  | db/db1 | db/db | 3648 | 0.030859 | FALSE | 0.880461 | FALSE | Photoreceptor          |
| GTTGAAC  | db/db1 | db/db | 1757 | 0.054795 | FALSE | 1.078269 | FALSE | Endothelia Aterial EC  |
| GTTGCGG  | db/db1 | db/db | 981  | 0.045165 | FALSE | 2.411099 | FALSE | Photoreceptor          |
| GTTGCGG  | db/db1 | db/db | 676  | 0.031411 | FALSE | 0.407892 | FALSE | Photoreceptor          |
| GTTGCGG  | db/db1 | db/db | 665  | 0.052669 | FALSE | 2.249979 | FALSE | Endothelia Capillary E |
| GTTGCGG  | db/db1 | db/db | 2029 | 0.025416 | FALSE | 1.190739 | FALSE | Endothelia EC-C4       |
| GTTGCGG  | db/db1 | db/db | 2001 | 0.015581 | FALSE | 1.005664 | FALSE | Endothelia Capillary E |
| GTTGCGG  | db/db1 | db/db | 865  | 0.042704 | FALSE | 0.567171 | FALSE | Photoreceptor          |
| GTTGCGG  | db/db1 | db/db | 4616 | 0.024534 | FALSE | 0.877217 | FALSE | Endothelia Venous EC   |
| GTTGCTCA | db/db1 | db/db | 3968 | 0.055901 | FALSE | 0.949935 | FALSE | Endothelia Venous EC   |
| GTTGCTCA | db/db1 | db/db | 3049 | 0.024971 | FALSE | 1.163055 | FALSE | Endothelia EC-C4       |
| GTTGCTCA | db/db1 | db/db | 4600 | 0.059406 | FALSE | 0.608743 | FALSE | Photoreceptor          |
| GTTGCTCC | db/db1 | db/db | 2180 | 0.059406 | FALSE | 1.576385 | FALSE | Endothelia Capillary E |

|                 |       |      |          |       |          |       |                        |
|-----------------|-------|------|----------|-------|----------|-------|------------------------|
| GTTGCTCC db/db1 | db/db | 3190 | 0.138889 | TRUE  | 2.827724 | FALSE |                        |
| GTTGCTCC db/db1 | db/db | 767  | 0.088776 | FALSE | 2.204087 | FALSE | Photoreceptor          |
| GTTGCTCC db/db1 | db/db | 6490 | 0.015581 | FALSE | 0.645479 | FALSE | Photoreceptor          |
| GTTGCTCT db/db1 | db/db | 1886 | 0.013074 | FALSE | 1.021543 | FALSE | Endothelia Capillary E |
| GTTGCTCT db/db1 | db/db | 944  | 0.048732 | FALSE | 0.565221 | FALSE | Photoreceptor          |
| GTTGCTCT db/db1 | db/db | 5274 | 0.046906 | FALSE | 0.701123 | FALSE | Endothelia Venous EC   |
| GTTGCTCT db/db1 | db/db | 1523 | 0.030318 | FALSE | 1.363473 | FALSE | Endothelia Capillary E |
| GTTGCTCT db/db1 | db/db | 1841 | 0.010384 | FALSE | 1.202398 | FALSE | Endothelia Capillary E |
| GTTGTAG db/db1  | db/db | 927  | 0.005095 | FALSE | 1.331022 | FALSE | Pericyte               |
| GTTGTAG db/db1  | db/db | 669  | 0.020171 | FALSE | 2.732015 | FALSE | Endothelia Capillary E |
| GTTGTAG db/db1  | db/db | 546  | 0.139562 | TRUE  | 2.809706 | FALSE |                        |
| GTTGTAG db/db1  | db/db | 2946 | 0.021286 | FALSE | 0.981444 | FALSE | Photoreceptor          |
| GTTGTAG db/db1  | db/db | 6221 | 0.018088 | FALSE | 0.583893 | FALSE | Photoreceptor          |
| GTTGTAG db/db1  | db/db | 1083 | 0.067388 | FALSE | 1.099322 | FALSE | Photoreceptor          |
| GTTGTAG db/db1  | db/db | 3606 | 0.012052 | FALSE | 1.069971 | FALSE | Photoreceptor          |
| GTTGTAG db/db1  | db/db | 2157 | 0.05065  | FALSE | 1.149706 | FALSE | Photoreceptor          |
| GTTGTAG db/db1  | db/db | 2133 | 0.051646 | FALSE | 0.648169 | FALSE | Photoreceptor          |
| GTTGTAG db/db1  | db/db | 1090 | 0.047807 | FALSE | 0.89458  | FALSE | Photoreceptor          |
| GTTGTAG db/db1  | db/db | 975  | 0.05065  | FALSE | 1.197286 | FALSE | Photoreceptor          |
| GTTGTAG db/db1  | db/db | 848  | 0.026796 | FALSE | 0.7467   | FALSE | Photoreceptor          |
| GTTGTCCC db/db1 | db/db | 3520 | 0.023682 | FALSE | 0.706551 | FALSE | Photoreceptor          |
| GTTGTCCC db/db1 | db/db | 3369 | 0.076994 | FALSE | 0.910616 | FALSE | Photoreceptor          |
| GTTGTCCC db/db1 | db/db | 1366 | 0.042704 | FALSE | 1.578439 | FALSE | Endothelia Capillary E |
| GTTGTCCC db/db1 | db/db | 774  | 0.029266 | FALSE | 1.802349 | FALSE | Photoreceptor          |
| GTTGTCCC db/db1 | db/db | 1707 | 0.017758 | FALSE | 1.108966 | FALSE | Endothelia Capillary E |
| GTTGTCCT db/db1 | db/db | 1093 | 0.013338 | FALSE | 0.936696 | FALSE | Endothelia Capillary E |
| GTTGTCCT db/db1 | db/db | 3836 | 0.021669 | FALSE | 0.947207 | FALSE | Photoreceptor          |
| GTTGTCCT db/db1 | db/db | 1635 | 0.013074 | FALSE | 1.113214 | FALSE | Endothelia Capillary E |
| GTTGTCCT db/db1 | db/db | 5965 | 0.039671 | FALSE | 0.644721 | FALSE | Photoreceptor          |
| GTTGTGA db/db1  | db/db | 1817 | 0.148377 | TRUE  | 1.506849 | FALSE |                        |
| GTTGTGA db/db1  | db/db | 604  | 0.020171 | FALSE | 0.429784 | FALSE | Neuron                 |
| GTTGTGA db/db1  | db/db | 1520 | 0.049679 | FALSE | 1.644834 | FALSE | Photoreceptor          |
| GTTGTGA db/db1  | db/db | 758  | 0.047807 | FALSE | 0.826158 | FALSE | Photoreceptor          |
| GTTGTGA db/db1  | db/db | 452  | 0.133788 | TRUE  | 3.34507  | FALSE |                        |
| GTTGTGA db/db1  | db/db | 2330 | 0.019455 | FALSE | 1.36886  | FALSE | Endothelia Capillary E |
| GTTGTGA db/db1  | db/db | 386  | 0.036891 | FALSE | 1.929511 | FALSE | Microglia              |
| GTTGTGA db/db1  | db/db | 8190 | 0.016488 | FALSE | 0.629899 | FALSE | Photoreceptor          |
| GTTTACTA db/db1 | db/db | 3234 | 0.020171 | FALSE | 0.652042 | FALSE | Photoreceptor          |
| GTTTACTA db/db1 | db/db | 667  | 0.059406 | FALSE | 3.404562 | FALSE | Muller cell            |
| GTTTACTC db/db1 | db/db | 1397 | 0.021286 | FALSE | 0.98775  | FALSE | Endothelia Capillary E |
| GTTTACTT db/db1 | db/db | 454  | 0.009933 | FALSE | 3.435328 | FALSE | Pericyte               |
| GTTTACTT db/db1 | db/db | 1401 | 0.095727 | FALSE | 1.003459 | FALSE | Photoreceptor          |
| GTTTACTT db/db1 | db/db | 2341 | 0.021286 | FALSE | 1.099189 | FALSE | Endothelia EC-C4       |
| GTTTGGA db/db1  | db/db | 6162 | 0.014711 | FALSE | 0.270599 | FALSE | Photoreceptor          |
| GTTTGGA db/db1  | db/db | 2391 | 0.053718 | FALSE | 1.105304 | FALSE | Photoreceptor          |
| GTTTGGA db/db1  | db/db | 5712 | 0.040404 | FALSE | 0.780663 | FALSE | Photoreceptor          |
| GTTTGGA db/db1  | db/db | 1067 | 0.045165 | FALSE | 1.623971 | FALSE | Photoreceptor          |

|                 |       |      |          |       |          |       |                         |
|-----------------|-------|------|----------|-------|----------|-------|-------------------------|
| GTTTGGAT db/db1 | db/db | 4618 | 0.044326 | FALSE | 0.927117 | FALSE | Endothelia Venous EC    |
| TAACACG db/db1  | db/db | 1246 | 0.119568 | TRUE  | 3.257077 | FALSE |                         |
| TAACACG db/db1  | db/db | 2988 | 0.024971 | FALSE | 1.073625 | FALSE | Endothelia Capillary EC |
| TAACACG db/db1  | db/db | 763  | 0.067388 | FALSE | 1.33592  | FALSE | Photoreceptor           |
| TAACACG db/db1  | db/db | 1787 | 0.023266 | FALSE | 1.186807 | FALSE | Endothelia Capillary EC |
| TAACACG db/db1  | db/db | 2301 | 0.034334 | FALSE | 1.028599 | FALSE | Endothelia EC-C4        |
| TAACACG db/db1  | db/db | 3416 | 0.021669 | FALSE | 0.928688 | FALSE | Endothelia EC-C4        |
| TAACACG db/db1  | db/db | 1757 | 0.036891 | FALSE | 1.032459 | FALSE | Endothelia Venous EC    |
| TAACCAG db/db1  | db/db | 1767 | 0.005782 | FALSE | 0.838558 | FALSE | Neuron                  |
| TAACCAG db/db1  | db/db | 678  | 0.040404 | FALSE | 0.975422 | FALSE | Photoreceptor           |
| TAACCAG db/db1  | db/db | 702  | 0.021669 | FALSE | 0.689341 | FALSE | Photoreceptor           |
| TAACCAG db/db1  | db/db | 1974 | 0.025868 | FALSE | 1.0313   | FALSE | Endothelia Venous EC    |
| TAACCAG db/db1  | db/db | 1283 | 0.038251 | FALSE | 0.360176 | FALSE | Photoreceptor           |
| TAACCAG db/db1  | db/db | 2732 | 0.036232 | FALSE | 0.960863 | FALSE | Neuron                  |
| TAACCAG db/db1  | db/db | 1803 | 0.024105 | FALSE | 1.040534 | FALSE | Photoreceptor           |
| TAACCAG db/db1  | db/db | 5519 | 0.17103  | TRUE  | 2.621746 | FALSE |                         |
| TAACCAG db/db1  | db/db | 1554 | 0.05065  | FALSE | 1.863253 | FALSE | Pericyte                |
| TAACCAG db/db1  | db/db | 1746 | 0.023266 | FALSE | 1.105759 | FALSE | Endothelia EC-C4        |
| TAACCAG db/db1  | db/db | 2585 | 0.04192  | FALSE | 1.083642 | FALSE | Photoreceptor           |
| TAACCAG db/db1  | db/db | 3087 | 0.022455 | FALSE | 0.756266 | FALSE | Endothelia EC-C4        |
| TAACCAG db/db1  | db/db | 583  | 0.005958 | FALSE | 2.151289 | FALSE | Pericyte                |
| TAACCAG db/db1  | db/db | 850  | 0.071958 | FALSE | 1.337067 | FALSE | Photoreceptor           |
| TAACGAC db/db1  | db/db | 3097 | 0.009933 | FALSE | 0.670739 | FALSE | Endothelia Venous EC    |
| TAACGAC db/db1  | db/db | 3674 | 0.009712 | FALSE | 1.300253 | FALSE | Photoreceptor           |
| TAACGAC db/db1  | db/db | 2898 | 0.051646 | FALSE | 1.12894  | FALSE | Photoreceptor           |
| TAACGAC db/db1  | db/db | 465  | 0.098234 | FALSE | 10.46154 | TRUE  |                         |
| TAACGACT db/db1 | db/db | 769  | 0.076994 | FALSE | 2.154024 | FALSE | Photoreceptor           |
| TAACGACT db/db1 | db/db | 1793 | 0.112037 | TRUE  | 1.730215 | FALSE |                         |
| TAACGACT db/db1 | db/db | 491  | 0.038953 | FALSE | 2.997137 | FALSE | Muller cell             |
| TAATTCC db/db1  | db/db | 1303 | 0.008032 | FALSE | 0.988021 | FALSE | Endothelia EC-C4        |
| TAATTCC db/db1  | db/db | 3978 | 0.078788 | FALSE | 0.872225 | FALSE | Photoreceptor           |
| TAATTCC db/db1  | db/db | 665  | 0.020908 | FALSE | 1.582279 | FALSE | Photoreceptor           |
| TAATTCT db/db1  | db/db | 6412 | 0.059406 | FALSE | 0.606194 | FALSE | Photoreceptor           |
| TAATTCT db/db1  | db/db | 901  | 0.116912 | TRUE  | 2.670623 | FALSE |                         |
| TAATTCT db/db1  | db/db | 1180 | 0.012557 | FALSE | 0.928778 | FALSE | Endothelia Capillary EC |
| TAAGCAC db/db1  | db/db | 1231 | 0.411992 | TRUE  | 1.255459 | FALSE |                         |
| TAAGCAC db/db1  | db/db | 750  | 0.052669 | FALSE | 1.987574 | FALSE | Photoreceptor           |
| TAAGCAC db/db1  | db/db | 4999 | 0.03313  | FALSE | 0.749176 | FALSE | Photoreceptor           |
| TAAGCAC db/db1  | db/db | 652  | 0.05065  | FALSE | 1.810725 | FALSE | Photoreceptor           |
| TAAGCAC db/db1  | db/db | 966  | 0.053718 | FALSE | 0.903728 | FALSE | Photoreceptor           |
| TAAGCAC db/db1  | db/db | 1698 | 0.080645 | FALSE | 1.336174 | FALSE | Photoreceptor           |
| TAAGCAC db/db1  | db/db | 1873 | 0.022455 | FALSE | 0.788925 | FALSE | Photoreceptor           |
| TAAGCAC db/db1  | db/db | 3446 | 0.029266 | FALSE | 1.13402  | FALSE | Photoreceptor           |
| TAAGCAC db/db1  | db/db | 457  | 0.041154 | FALSE | 54.68165 | TRUE  |                         |
| TAAGCAC db/db1  | db/db | 1060 | 0.052669 | FALSE | 1.157284 | FALSE | Photoreceptor           |
| TAAGCAC db/db1  | db/db | 798  | 0.038251 | FALSE | 0.91259  | FALSE | Photoreceptor           |
| TAAGCACT db/db1 | db/db | 2219 | 0.063221 | FALSE | 1.576517 | FALSE | Neuron                  |

|                 |       |      |          |       |          |       |                        |
|-----------------|-------|------|----------|-------|----------|-------|------------------------|
| TAAGCCA/db/db1  | db/db | 8289 | 0.019106 | FALSE | 0.534836 | FALSE | Photoreceptor          |
| TAAGCCA/db/db1  | db/db | 7315 | 0.021669 | FALSE | 0.56868  | FALSE | Photoreceptor          |
| TAAGCCA/db/db1  | db/db | 401  | 0.043505 | FALSE | 4.039557 | FALSE | Muller cell            |
| TAAGCCA/db/db1  | db/db | 766  | 0.015581 | FALSE | 1.733568 | FALSE | Muller cell            |
| TAAGCCA/db/db1  | db/db | 4013 | 0.016799 | FALSE | 0.720822 | FALSE | Photoreceptor          |
| TAAGCCA/db/db1  | db/db | 628  | 0.04192  | FALSE | 2.975789 | FALSE | Muller cell            |
| TAAGCCAT/db/db1 | db/db | 700  | 0.018761 | FALSE | 3.406141 | FALSE | Muller cell            |
| TAAGCCAT/db/db1 | db/db | 3339 | 0.011319 | FALSE | 0.370178 | FALSE | Photoreceptor          |
| TAAGCCAT/db/db1 | db/db | 2792 | 0.011319 | FALSE | 0.399054 | FALSE | Photoreceptor          |
| TAAGCGT/db/db1  | db/db | 1081 | 0.027273 | FALSE | 1.1248   | FALSE | Muller cell            |
| TAAGCGT/db/db1  | db/db | 1740 | 0.026796 | FALSE | 1.383969 | FALSE | Pericyte               |
| TAAGCGT/db/db1  | db/db | 2981 | 0.029787 | FALSE | 0.665092 | FALSE | Photoreceptor          |
| TAAGCGT/db/db1  | db/db | 4482 | 0.148319 | TRUE  | 4.901282 | FALSE |                        |
| TAAGCGT/db/db1  | db/db | 840  | 0.053718 | FALSE | 1.92899  | FALSE | Photoreceptor          |
| TAAGCGT/db/db1  | db/db | 1945 | 0.023682 | FALSE | 0.511071 | FALSE | Photoreceptor          |
| TAAGCGT/db/db1  | db/db | 562  | 0.08663  | FALSE | 9.494452 | TRUE  |                        |
| TAAGCGT/db/db1  | db/db | 2741 | 0.03313  | FALSE | 1.091518 | FALSE | Endothelia Capillary E |
| TAAGCGT/db/db1  | db/db | 664  | 0.028754 | FALSE | 0.496884 | FALSE | Photoreceptor          |
| TAAGCGT/db/db1  | db/db | 3689 | 0.022059 | FALSE | 0.930345 | FALSE | Endothelia Capillary E |
| TAAGCGT/db/db1  | db/db | 658  | 0.126437 | TRUE  | 24.47419 | TRUE  |                        |
| TAAGTCG/db/db1  | db/db | 3127 | 0.051646 | FALSE | 1.044172 | FALSE | Photoreceptor          |
| TAAGTCG/db/db1  | db/db | 3395 | 0.057037 | FALSE | 0.74069  | FALSE | Endothelia Venous EC   |
| TAAGTCG/db/db1  | db/db | 1382 | 0.023266 | FALSE | 0.585015 | FALSE | Photoreceptor          |
| TAAGTCG/db/db1  | db/db | 1367 | 0.007441 | FALSE | 1.670949 | FALSE | Endothelia Capillary E |
| TAATCTCA/db/db1 | db/db | 733  | 0.060641 | FALSE | 1.596869 | FALSE | Endothelia EC-C4       |
| TAATCTCA/db/db1 | db/db | 3323 | 0.024105 | FALSE | 1.024917 | FALSE | Endothelia EC-C4       |
| TAATCTCA/db/db1 | db/db | 1279 | 0.030318 | FALSE | 0.421168 | FALSE | Photoreceptor          |
| TAATCTCA/db/db1 | db/db | 2116 | 0.019455 | FALSE | 0.885036 | FALSE | Microglia              |
| TAATCTCC/db/db1 | db/db | 972  | 0.080645 | FALSE | 1.451265 | FALSE | Photoreceptor          |
| TAATCTCC/db/db1 | db/db | 4002 | 0.057037 | FALSE | 1.003649 | FALSE | Photoreceptor          |
| TAATCTCG/db/db1 | db/db | 744  | 0.060641 | FALSE | 1.046997 | FALSE | Photoreceptor          |
| TAATCTCG/db/db1 | db/db | 502  | 0.010157 | FALSE | 0.627563 | FALSE | Photoreceptor          |
| TAATCTCG/db/db1 | db/db | 641  | 0.034954 | FALSE | 7.336343 | TRUE  |                        |
| TAATCTCG/db/db1 | db/db | 689  | 0.025868 | FALSE | 1.048363 | FALSE | Photoreceptor          |
| TAATTTCA/db/db1 | db/db | 4153 | 0.028754 | FALSE | 0.83547  | FALSE | Endothelia EC-C4       |
| TAATTTCA/db/db1 | db/db | 1470 | 0.024534 | FALSE | 1.199427 | FALSE | Endothelia Capillary E |
| TAATTTCA/db/db1 | db/db | 1158 | 0.051646 | FALSE | 1.686908 | FALSE | Endothelia Venous EC   |
| TAATTTCC/db/db1 | db/db | 392  | 0.01981  | FALSE | 0.392817 | FALSE | Photoreceptor          |
| TAATTTCC/db/db1 | db/db | 1276 | 0.037564 | FALSE | 1.763852 | FALSE | Photoreceptor          |
| TAATTTCC/db/db1 | db/db | 2109 | 0.039671 | FALSE | 1.413903 | FALSE | Neuron                 |
| TAATTTCC/db/db1 | db/db | 8031 | 0.045165 | FALSE | 0.617999 | FALSE | Photoreceptor          |
| TAATTTCT/db/db1 | db/db | 3269 | 0.036891 | FALSE | 0.86825  | FALSE | Photoreceptor          |
| TAATTTCT/db/db1 | db/db | 437  | 0.007249 | FALSE | 2.121795 | FALSE | Photoreceptor          |
| TACAACG/db/db1  | db/db | 1940 | 0.108718 | TRUE  | 2.310655 | FALSE |                        |
| TACAACG/db/db1  | db/db | 5942 | 0.014429 | FALSE | 0.168115 | FALSE | Photoreceptor          |
| TACAACG/db/db1  | db/db | 1436 | 0.043505 | FALSE | 2.532881 | FALSE | Muller cell            |
| TACAACG/db/db1  | db/db | 1102 | 0.020171 | FALSE | 1.495924 | FALSE | Photoreceptor          |

|                  |       |      |          |       |          |       |                        |
|------------------|-------|------|----------|-------|----------|-------|------------------------|
| TACAACGC db/db1  | db/db | 1940 | 0.082569 | FALSE | 1.336111 | FALSE | Photoreceptor          |
| TACAACGT db/db1  | db/db | 5848 | 0.030318 | FALSE | 0.819921 | FALSE | Photoreceptor          |
| TACAACGT db/db1  | db/db | 3643 | 0.014711 | FALSE | 0.807999 | FALSE | Endothelia EC-C4       |
| TACACCCA db/db1  | db/db | 1641 | 0.133788 | TRUE  | 2.919971 | FALSE |                        |
| TACACCCA db/db1  | db/db | 491  | 0.049679 | FALSE | 3.779123 | FALSE | Photoreceptor          |
| TACACCCA db/db1  | db/db | 2319 | 0.088776 | FALSE | 6.84581  | TRUE  |                        |
| TACACCCA db/db1  | db/db | 1285 | 0.059406 | FALSE | 0.984724 | FALSE | Photoreceptor          |
| TACACCCA db/db1  | db/db | 8596 | 0.020908 | FALSE | 0.573035 | FALSE | Photoreceptor          |
| TACACCCA db/db1  | db/db | 604  | 0.029266 | FALSE | 2.67141  | FALSE | Muller cell            |
| TACACCCC db/db1  | db/db | 802  | 0.078788 | FALSE | 1.526499 | FALSE | Endothelia Capillary E |
| TACACCCC db/db1  | db/db | 664  | 0.005958 | FALSE | 3.03888  | FALSE | Endothelia Capillary E |
| TACACCCC db/db1  | db/db | 1381 | 0.012557 | FALSE | 1.01165  | FALSE | Endothelia Capillary E |
| TACACCCC db/db1  | db/db | 6014 | 0.031411 | FALSE | 0.552222 | FALSE | Photoreceptor          |
| TACACCCC db/db1  | db/db | 1579 | 0.064568 | FALSE | 2.759325 | FALSE | Muller cell            |
| TACACCCC db/db1  | db/db | 1009 | 0.036891 | FALSE | 1.672846 | FALSE | Photoreceptor          |
| TACACCCG db/db1  | db/db | 5053 | 0.048732 | FALSE | 0.888125 | FALSE | Endothelia Venous EC   |
| TACACCCT db/db1  | db/db | 4548 | 0.031411 | FALSE | 0.863698 | FALSE | Endothelia EC-C4       |
| TACAGGTC db/db1  | db/db | 1336 | 0.063221 | FALSE | 1.008795 | FALSE | Neuron                 |
| TACAGGTC db/db1  | db/db | 7568 | 0.028754 | FALSE | 0.426942 | FALSE | Photoreceptor          |
| TACAGGTC db/db1  | db/db | 489  | 0.049679 | FALSE | 2.574976 | FALSE | Muller cell            |
| TACAGGTT db/db1  | db/db | 1744 | 0.009933 | FALSE | 1.072299 | FALSE | Endothelia Capillary E |
| TACATTCA db/db1  | db/db | 1183 | 0.013074 | FALSE | 0.77841  | FALSE | Photoreceptor          |
| TACATTCA db/db1  | db/db | 502  | 0.013876 | FALSE | 2.777966 | FALSE | Photoreceptor          |
| TACATTCC db/db1  | db/db | 2029 | 0.065957 | FALSE | 1.161985 | FALSE | Photoreceptor          |
| TACATTCC db/db1  | db/db | 497  | 0.102758 | TRUE  | 0.584795 | FALSE |                        |
| TACATTCC db/db1  | db/db | 1276 | 0.039671 | FALSE | 0.848976 | FALSE | Neuron                 |
| TACATTCCG db/db1 | db/db | 2659 | 0.051646 | FALSE | 0.910898 | FALSE | Microglia              |
| TACATTCCG db/db1 | db/db | 847  | 0.08663  | FALSE | 0.406366 | FALSE | Photoreceptor          |
| TACCCACA db/db1  | db/db | 3901 | 0.019106 | FALSE | 0.888321 | FALSE | Endothelia Venous EC   |
| TACCCACC db/db1  | db/db | 1179 | 0.055901 | FALSE | 1.325783 | FALSE | Photoreceptor          |
| TACCCACG db/db1  | db/db | 6206 | 0.020908 | FALSE | 0.783041 | FALSE | Photoreceptor          |
| TACCCACG db/db1  | db/db | 2358 | 0.031411 | FALSE | 0.628049 | FALSE | Photoreceptor          |
| TACCCACG db/db1  | db/db | 1708 | 0.049679 | FALSE | 1.142461 | FALSE | Photoreceptor          |
| TACCCACG db/db1  | db/db | 6212 | 0.022059 | FALSE | 0.452321 | FALSE | Photoreceptor          |
| TACCCACG db/db1  | db/db | 1214 | 0.018422 | FALSE | 1.539417 | FALSE | Endothelia Capillary E |
| TACCCACT db/db1  | db/db | 1339 | 0.017758 | FALSE | 1.525823 | FALSE | Endothelia Capillary E |
| TACCCACT db/db1  | db/db | 3744 | 0.025416 | FALSE | 0.896848 | FALSE | Endothelia EC-C4       |
| TACCCGTA db/db1  | db/db | 8319 | 0.043505 | FALSE | 0.485191 | FALSE | Photoreceptor          |
| TACCCGTA db/db1  | db/db | 1009 | 0.103732 | TRUE  | 2.338009 | FALSE |                        |
| TACCCGTA db/db1  | db/db | 429  | 0.075259 | FALSE | 3.584949 | FALSE | Muller cell            |
| TACCCGTC db/db1  | db/db | 7163 | 0.025416 | FALSE | 0.533516 | FALSE | Photoreceptor          |
| TACCCGTC db/db1  | db/db | 484  | 0.042704 | FALSE | 0.904182 | FALSE | Photoreceptor          |
| TACCCGTT db/db1  | db/db | 3382 | 0.044326 | FALSE | 0.986221 | FALSE | Photoreceptor          |
| TACCCGTT db/db1  | db/db | 428  | 0.093319 | FALSE | 1.713397 | FALSE | Photoreceptor          |
| TACCCGTT db/db1  | db/db | 794  | 0.057037 | FALSE | 1.697682 | FALSE | Endothelia Capillary E |
| TACCGAA db/db1   | db/db | 655  | 0.051646 | FALSE | 1.216385 | FALSE | Photoreceptor          |
| TACCGAA db/db1   | db/db | 725  | 0.091004 | FALSE | 1.070438 | FALSE | Photoreceptor          |

|                 |       |      |          |       |          |       |                        |
|-----------------|-------|------|----------|-------|----------|-------|------------------------|
| TACCGAA/ db/db1 | db/db | 1163 | 0.054795 | FALSE | 2.028832 | FALSE | Photoreceptor          |
| TACCGAA/ db/db1 | db/db | 1686 | 0.018761 | FALSE | 0.714511 | FALSE | Photoreceptor          |
| TACCGAA( db/db1 | db/db | 8489 | 0.022059 | FALSE | 0.351504 | FALSE | Photoreceptor          |
| TACCGAA( db/db1 | db/db | 8136 | 0.036232 | FALSE | 0.534092 | FALSE | Photoreceptor          |
| TACCGAA( db/db1 | db/db | 3731 | 0.024971 | FALSE | 0.774744 | FALSE | Photoreceptor          |
| TACCGAAT db/db1 | db/db | 1088 | 0.043505 | FALSE | 0.839644 | FALSE | Photoreceptor          |
| TACCGAAT db/db1 | db/db | 2869 | 0.025416 | FALSE | 0.999888 | FALSE | Endothelia Capillary E |
| TACCGGG( db/db1 | db/db | 1170 | 0.007058 | FALSE | 0.928671 | FALSE | Endothelia Capillary E |
| TACCGGG( db/db1 | db/db | 1057 | 0.024534 | FALSE | 1.860797 | FALSE | Endothelia Venous EC   |
| TACCGGG  db/db1 | db/db | 9510 | 0.018088 | FALSE | 0.458923 | FALSE | Photoreceptor          |
| TACCGGG  db/db1 | db/db | 2534 | 0.103567 | TRUE  | 1.853658 | FALSE |                        |
| TACCTCGA db/db1 | db/db | 4228 | 0.036232 | FALSE | 0.759168 | FALSE | Photoreceptor          |
| TACCTCGA db/db1 | db/db | 747  | 0.119124 | TRUE  | 4        | FALSE |                        |
| TACCTCGC db/db1 | db/db | 3188 | 0.034954 | FALSE | 0.956315 | FALSE | Photoreceptor          |
| TACCTCGC db/db1 | db/db | 1408 | 0.030859 | FALSE | 0.41571  | FALSE | Photoreceptor          |
| TACCTCGC db/db1 | db/db | 6010 | 0.022455 | FALSE | 0.792934 | FALSE | Photoreceptor          |
| TACCTCGC db/db1 | db/db | 1964 | 0.052669 | FALSE | 1.334538 | FALSE | Photoreceptor          |
| TACCTCGT db/db1 | db/db | 1250 | 0.071958 | FALSE | 8.10163  | TRUE  |                        |
| TACCTCGT db/db1 | db/db | 3683 | 0.027273 | FALSE | 1.168379 | FALSE | Neuron                 |
| TACCTGCA db/db1 | db/db | 477  | 0.053718 | FALSE | 2.237517 | FALSE | Endothelia Capillary E |
| TACCTGCC db/db1 | db/db | 754  | 0.008644 | FALSE | 1.280805 | FALSE | Endothelia Capillary E |
| TACCTGCC db/db1 | db/db | 566  | 0.023266 | FALSE | 0.49729  | FALSE | Photoreceptor          |
| TACCTGCC db/db1 | db/db | 516  | 0.004762 | FALSE | 2.635072 | FALSE | Pericyte               |
| TACCTGCC db/db1 | db/db | 1946 | 0.026796 | FALSE | 1.478727 | FALSE | Endothelia Venous EC   |
| TACGCTCA db/db1 | db/db | 7605 | 0.014711 | FALSE | 0.77176  | FALSE | Photoreceptor          |
| TACGCTCA db/db1 | db/db | 1915 | 0.042704 | FALSE | 1.246454 | FALSE | Photoreceptor          |
| TACGCTCC db/db1 | db/db | 832  | 0.051646 | FALSE | 1.936922 | FALSE | Photoreceptor          |
| TACGCTCC db/db1 | db/db | 2677 | 0.052669 | FALSE | 0.949664 | FALSE | Endothelia Venous EC   |
| TACGCTCC db/db1 | db/db | 2172 | 0.055901 | FALSE | 0.792252 | FALSE | Photoreceptor          |
| TACGCTCT db/db1 | db/db | 589  | 0.035586 | FALSE | 2.248186 | FALSE | Photoreceptor          |
| TACGGGC/ db/db1 | db/db | 913  | 0.012814 | FALSE | 1.424612 | FALSE | Endothelia Capillary E |
| TACGGGC( db/db1 | db/db | 1074 | 0.027273 | FALSE | 0.970291 | FALSE | Photoreceptor          |
| TACGGGC( db/db1 | db/db | 492  | 0.138889 | TRUE  | 3.098592 | FALSE |                        |
| TACGGGC( db/db1 | db/db | 2360 | 0.05065  | FALSE | 1.007788 | FALSE | Photoreceptor          |
| TACGGGC( db/db1 | db/db | 564  | 0.067388 | FALSE | 0.886527 | FALSE | Photoreceptor          |
| TACGGGC( db/db1 | db/db | 825  | 0.080645 | FALSE | 1.776493 | FALSE | Photoreceptor          |
| TACGGGC( db/db1 | db/db | 504  | 0.037564 | FALSE | 2.17967  | FALSE | Pericyte               |
| TACGGGC  db/db1 | db/db | 894  | 0.073582 | FALSE | 1.279044 | FALSE | Photoreceptor          |
| TACGGTA/ db/db1 | db/db | 1458 | 0.038251 | FALSE | 1.369844 | FALSE | Endothelia Capillary E |
| TACGGTA( db/db1 | db/db | 883  | 0.046025 | FALSE | 1.901564 | FALSE | Photoreceptor          |
| TACGGTA( db/db1 | db/db | 911  | 0.088776 | FALSE | 1.785342 | FALSE | Photoreceptor          |
| TACGGTA( db/db1 | db/db | 905  | 0.314286 | TRUE  | 4.017857 | FALSE |                        |
| TACGGTA( db/db1 | db/db | 1112 | 0.018422 | FALSE | 0.387493 | FALSE | Photoreceptor          |
| TACGGTA( db/db1 | db/db | 385  | 0.093319 | FALSE | 4.830584 | FALSE | Photoreceptor          |
| TACGGTA( db/db1 | db/db | 1295 | 0.106408 | TRUE  | 5.536502 | TRUE  |                        |
| TACGGTA( db/db1 | db/db | 6221 | 0.036891 | FALSE | 0.78895  | FALSE | Photoreceptor          |
| TACGGTA( db/db1 | db/db | 2298 | 0.010384 | FALSE | 1.245412 | FALSE | Endothelia Venous EC   |



|                 |       |      |          |       |          |       |                        |
|-----------------|-------|------|----------|-------|----------|-------|------------------------|
| TACGGTAT db/db1 | db/db | 658  | 0.093319 | FALSE | 2.502788 | FALSE | Microglia              |
| TACGGTAT db/db1 | db/db | 3038 | 0.014711 | FALSE | 1.017803 | FALSE | Endothelia Venous EC   |
| TACGGTAT db/db1 | db/db | 968  | 0.012052 | FALSE | 1.351115 | FALSE | Endothelia Capillary E |
| TACGTCCA db/db1 | db/db | 6254 | 0.018761 | FALSE | 0.592451 | FALSE | Photoreceptor          |
| TACGTCCA db/db1 | db/db | 8316 | 0.021286 | FALSE | 0.52659  | FALSE | Photoreceptor          |
| TACGTCCA db/db1 | db/db | 3213 | 0.018761 | FALSE | 0.994898 | FALSE | Endothelia Capillary E |
| TACGTCCA db/db1 | db/db | 753  | 0.029787 | FALSE | 1.317596 | FALSE | Photoreceptor          |
| TACGTCCC db/db1 | db/db | 3968 | 0.047807 | FALSE | 0.972333 | FALSE | Endothelia Venous EC   |
| TACGTCCC db/db1 | db/db | 380  | 0.037564 | FALSE | 2.262465 | FALSE | Endothelia Capillary E |
| TACGTCCC db/db1 | db/db | 6947 | 0.010846 | FALSE | 0.153181 | FALSE | Photoreceptor          |
| TACGTCCC db/db1 | db/db | 1792 | 0.018761 | FALSE | 0.597403 | FALSE | Photoreceptor          |
| TACTGCCA db/db1 | db/db | 6866 | 0.016181 | FALSE | 0.637509 | FALSE | Photoreceptor          |
| TACTGCCA db/db1 | db/db | 907  | 0.075259 | FALSE | 1.804255 | FALSE | Photoreceptor          |
| TACTGCCG db/db1 | db/db | 451  | 0.025868 | FALSE | 3.04106  | FALSE | Photoreceptor          |
| TACTGCCG db/db1 | db/db | 1080 | 0.020908 | FALSE | 2.628322 | FALSE | Muller cell            |
| TACTTACA db/db1 | db/db | 1607 | 0.009933 | FALSE | 1.199325 | FALSE | Endothelia Capillary E |
| TACTTACC db/db1 | db/db | 2894 | 0.031411 | FALSE | 0.786767 | FALSE | Photoreceptor          |
| TACTTACC db/db1 | db/db | 4660 | 0.025868 | FALSE | 0.628906 | FALSE | Photoreceptor          |
| TACTTACG db/db1 | db/db | 3117 | 0.031411 | FALSE | 1.101223 | FALSE | Endothelia EC-C4       |
| TACTTACG db/db1 | db/db | 1582 | 0.046906 | FALSE | 0.80601  | FALSE | Microglia              |
| TACTTACG db/db1 | db/db | 2463 | 0.013338 | FALSE | 1.033943 | FALSE | Endothelia EC-C4       |
| TACTTACG db/db1 | db/db | 978  | 0.05065  | FALSE | 1.901283 | FALSE | Photoreceptor          |
| TACTTACG db/db1 | db/db | 2668 | 0.130259 | TRUE  | 4.516962 | FALSE |                        |
| TACTTACG db/db1 | db/db | 2632 | 0.011561 | FALSE | 1.05627  | FALSE | Endothelia Venous EC   |
| TACTTACT db/db1 | db/db | 344  | 0.045165 | FALSE | 7.235622 | TRUE  |                        |
| TACTTACT db/db1 | db/db | 2357 | 0.020171 | FALSE | 1.054094 | FALSE | Endothelia EC-C4       |
| TACTTCAA db/db1 | db/db | 1633 | 0.049679 | FALSE | 1.800582 | FALSE | Photoreceptor          |
| TACTTCAC db/db1 | db/db | 1093 | 0.008644 | FALSE | 1.179167 | FALSE | Endothelia Capillary E |
| TACTTCAC db/db1 | db/db | 2330 | 0.023266 | FALSE | 1.678948 | FALSE | Photoreceptor          |
| TACTTCAG db/db1 | db/db | 2758 | 0.098234 | FALSE | 1.314368 | FALSE | Endothelia Capillary E |
| TACTTCAG db/db1 | db/db | 3089 | 0.041154 | FALSE | 0.938039 | FALSE | Photoreceptor          |
| TACTTCAG db/db1 | db/db | 2361 | 0.007441 | FALSE | 1.411077 | FALSE | Photoreceptor          |
| TACTTCAG db/db1 | db/db | 3032 | 0.063221 | FALSE | 1.078388 | FALSE | Endothelia Capillary E |
| TACTTCAT db/db1 | db/db | 6549 | 0.112477 | TRUE  | 1.400008 | FALSE |                        |
| TACTTGTA db/db1 | db/db | 2812 | 0.15354  | TRUE  | 6.620667 | TRUE  |                        |
| TACTTGTA db/db1 | db/db | 3623 | 0.020171 | FALSE | 0.791816 | FALSE | Photoreceptor          |
| TACTTGTA db/db1 | db/db | 4451 | 0.015287 | FALSE | 0.654135 | FALSE | Photoreceptor          |
| TACTTGTA db/db1 | db/db | 6614 | 0.020536 | FALSE | 0.691931 | FALSE | Endothelia Venous EC   |
| TACTTGTA db/db1 | db/db | 738  | 0.043505 | FALSE | 3.738482 | FALSE | Muller cell            |
| TACTTGTC db/db1 | db/db | 1779 | 0.059406 | FALSE | 1.346317 | FALSE | Photoreceptor          |
| TACTTGTC db/db1 | db/db | 3752 | 0.018088 | FALSE | 0.682631 | FALSE | Photoreceptor          |
| TACTTGTT db/db1 | db/db | 1282 | 0.100845 | TRUE  | 6.521739 | TRUE  |                        |
| TAGACCAC db/db1 | db/db | 788  | 0.044326 | FALSE | 2.361041 | FALSE | Photoreceptor          |
| TAGACCAC db/db1 | db/db | 8720 | 0.01981  | FALSE | 0.59713  | FALSE | Photoreceptor          |
| TAGACCAC db/db1 | db/db | 635  | 0.026796 | FALSE | 2.383997 | FALSE | Pericyte               |
| TAGACCAC db/db1 | db/db | 2710 | 0.031973 | FALSE | 1.004824 | FALSE | Endothelia Venous EC   |
| TAGACCAC db/db1 | db/db | 4812 | 0.049679 | FALSE | 0.758196 | FALSE | Endothelia Venous EC   |

|                 |       |      |          |       |          |       |                        |
|-----------------|-------|------|----------|-------|----------|-------|------------------------|
| TAGACTG/ db/db1 | db/db | 691  | 0.038953 | FALSE | 2.309738 | FALSE | Photoreceptor          |
| TAGACTG/ db/db1 | db/db | 2611 | 0.027758 | FALSE | 1.05281  | FALSE | Photoreceptor          |
| TAGACTG/ db/db1 | db/db | 887  | 0.021286 | FALSE | 2.499754 | FALSE | Muller cell            |
| TAGACTG( db/db1 | db/db | 884  | 0.044326 | FALSE | 1.244211 | FALSE | Photoreceptor          |
| TAGACTG( db/db1 | db/db | 1262 | 0.042704 | FALSE | 2.125531 | FALSE | Muller cell            |
| TAGACTG( db/db1 | db/db | 1668 | 0.024105 | FALSE | 0.792019 | FALSE | Photoreceptor          |
| TAGACTG  db/db1 | db/db | 1779 | 0.011805 | FALSE | 0.947758 | FALSE | Endothelia Capillary E |
| TAGACTG  db/db1 | db/db | 585  | 0.078788 | FALSE | 7.344633 | TRUE  |                        |
| TAGAGTC/ db/db1 | db/db | 804  | 0.020908 | FALSE | 1.036442 | FALSE | Photoreceptor          |
| TAGAGTC( db/db1 | db/db | 2439 | 0.091004 | FALSE | 1.179897 | FALSE | Endothelia Venous EC   |
| TAGAGTC( db/db1 | db/db | 922  | 0.088776 | FALSE | 1.718216 | FALSE | Endothelia Capillary E |
| TAGAGTC( db/db1 | db/db | 4149 | 0.047807 | FALSE | 0.763637 | FALSE | Endothelia Venous EC   |
| TAGAGTC( db/db1 | db/db | 1007 | 0.040404 | FALSE | 0.368329 | FALSE | Photoreceptor          |
| TAGAGTC( db/db1 | db/db | 463  | 0.012052 | FALSE | 1.588192 | FALSE | Endothelia Capillary E |
| TAGAGTCT db/db1 | db/db | 4028 | 0.109375 | TRUE  | 3.392226 | FALSE |                        |
| TAGAGTCT db/db1 | db/db | 1346 | 0.025868 | FALSE | 0.721391 | FALSE | Photoreceptor          |
| TAGAGTCT db/db1 | db/db | 3041 | 0.015581 | FALSE | 0.561558 | FALSE | Endothelia EC-C4       |
| TAGATCG/ db/db1 | db/db | 7046 | 0.012052 | FALSE | 0.499393 | FALSE | Photoreceptor          |
| TAGATCG( db/db1 | db/db | 616  | 0.028251 | FALSE | 1.005674 | FALSE | Photoreceptor          |
| TAGATCG( db/db1 | db/db | 587  | 0.029787 | FALSE | 1.027192 | FALSE | Photoreceptor          |
| TAGATCG( db/db1 | db/db | 1024 | 0.045165 | FALSE | 1.53084  | FALSE | Photoreceptor          |
| TAGATCG( db/db1 | db/db | 5526 | 0.027273 | FALSE | 0.694474 | FALSE | Photoreceptor          |
| TAGATCG( db/db1 | db/db | 792  | 0.119124 | TRUE  | 9.030654 | TRUE  |                        |
| TAGATCG( db/db1 | db/db | 2337 | 0.030859 | FALSE | 0.573895 | FALSE | Photoreceptor          |
| TAGATCG  db/db1 | db/db | 2065 | 0.04192  | FALSE | 1.108873 | FALSE | Endothelia Aterial EC  |
| TAGATCG  db/db1 | db/db | 1852 | 0.026796 | FALSE | 1.407322 | FALSE | Neuron                 |
| TAGCACAC db/db1 | db/db | 804  | 0.018422 | FALSE | 2.125547 | FALSE | Endothelia Capillary E |
| TAGCACAC db/db1 | db/db | 388  | 0.057037 | FALSE | 2.675237 | FALSE | Photoreceptor          |
| TAGCACAC db/db1 | db/db | 1199 | 0.008438 | FALSE | 1.229457 | FALSE | Pericyte               |
| TAGCACAT db/db1 | db/db | 1717 | 0.098234 | FALSE | 1.480435 | FALSE | Photoreceptor          |
| TAGGAGG db/db1  | db/db | 1489 | 0.060641 | FALSE | 1.132137 | FALSE | Photoreceptor          |
| TAGGAGG db/db1  | db/db | 7576 | 0.024105 | FALSE | 0.47859  | FALSE | Photoreceptor          |
| TAGGAGG db/db1  | db/db | 1857 | 0.038953 | FALSE | 0.722226 | FALSE | Photoreceptor          |
| TAGGGTT/ db/db1 | db/db | 834  | 0.05065  | FALSE | 0.976973 | FALSE | Photoreceptor          |
| TAGGGTT/ db/db1 | db/db | 888  | 0.060641 | FALSE | 2.071826 | FALSE | Photoreceptor          |
| TAGGGTT( db/db1 | db/db | 1270 | 0.011561 | FALSE | 1.398816 | FALSE | Endothelia EC-C4       |
| TAGGGTT( db/db1 | db/db | 2018 | 0.040404 | FALSE | 1.185011 | FALSE | Endothelia Capillary E |
| TAGGGTT( db/db1 | db/db | 569  | 0.042704 | FALSE | 0.863709 | FALSE | Photoreceptor          |
| TAGGGTT( db/db1 | db/db | 1939 | 0.106408 | TRUE  | 3.106736 | FALSE |                        |
| TAGGGTT( db/db1 | db/db | 623  | 0.070386 | FALSE | 5.944056 | TRUE  |                        |
| TAGGGTT  db/db1 | db/db | 650  | 0.028251 | FALSE | 2.584091 | FALSE | Endothelia Capillary E |
| TAGGTAC/ db/db1 | db/db | 2854 | 0.049679 | FALSE | 0.717507 | FALSE | Photoreceptor          |
| TAGGTAC/ db/db1 | db/db | 438  | 0.016799 | FALSE | 0.825161 | FALSE | Photoreceptor          |
| TAGGTACC db/db1 | db/db | 1161 | 0.046025 | FALSE | 1.632594 | FALSE | Photoreceptor          |
| TAGGTACC db/db1 | db/db | 1933 | 0.08663  | FALSE | 1.294626 | FALSE | Photoreceptor          |
| TAGGTACC db/db1 | db/db | 1973 | 0.009063 | FALSE | 0.975178 | FALSE | Endothelia EC-C4       |
| TAGGTACC db/db1 | db/db | 7150 | 0.025868 | FALSE | 0.558507 | FALSE | Photoreceptor          |

|                  |       |      |          |       |          |       |                        |
|------------------|-------|------|----------|-------|----------|-------|------------------------|
| TAGGTTG/ db/db1  | db/db | 3186 | 0.148377 | TRUE  | 1.738411 | FALSE |                        |
| TAGGTTG/ db/db1  | db/db | 1742 | 0.059406 | FALSE | 1.463786 | FALSE | Photoreceptor          |
| TAGGTTG( db/db1  | db/db | 3378 | 0.485327 | TRUE  | 3.92482  | FALSE |                        |
| TAGGTTG( db/db1  | db/db | 3496 | 0.109375 | TRUE  | 1.460035 | FALSE |                        |
| TAGGTTG( db/db1  | db/db | 401  | 0.065957 | FALSE | 9.284332 | TRUE  |                        |
| TAGGTTG( db/db1  | db/db | 5128 | 0.057037 | FALSE | 0.701516 | FALSE | Endothelia Venous EC   |
| TAGGTTG( db/db1  | db/db | 3622 | 0.017114 | FALSE | 0.286079 | FALSE | Photoreceptor          |
| TAGGTTG( db/db1  | db/db | 2453 | 0.025868 | FALSE | 0.838965 | FALSE | Endothelia Capillary E |
| TAGGTTG( db/db1  | db/db | 780  | 0.009063 | FALSE | 1.677126 | FALSE | Endothelia EC-C4       |
| TAGGTTG( db/db1  | db/db | 519  | 0.048732 | FALSE | 1.067548 | FALSE | Photoreceptor          |
| TAGGTTG  db/db1  | db/db | 5345 | 0.382671 | TRUE  | 2.022555 | FALSE |                        |
| TAGGTTG  db/db1  | db/db | 1047 | 0.049679 | FALSE | 2.996793 | FALSE | Muller cell            |
| TAGGTTG  db/db1  | db/db | 592  | 0.034334 | FALSE | 3.464135 | FALSE | Muller cell            |
| TAGGTTG  db/db1  | db/db | 2112 | 0.088776 | FALSE | 1.462782 | FALSE | Photoreceptor          |
| TAGTGCA/ db/db1  | db/db | 386  | 0.095727 | FALSE | 12.18075 | TRUE  |                        |
| TAGTGCA( db/db1  | db/db | 1545 | 0.059406 | FALSE | 0.986891 | FALSE | Photoreceptor          |
| TAGTGCA( db/db1  | db/db | 2458 | 0.020171 | FALSE | 0.984406 | FALSE | Endothelia Venous EC   |
| TAGTGCA( db/db1  | db/db | 1178 | 0.019106 | FALSE | 1.628242 | FALSE | Muller cell            |
| TAGTGCA( db/db1  | db/db | 3078 | 0.021669 | FALSE | 0.894004 | FALSE | Endothelia Venous EC   |
| TAGTGCA( db/db1  | db/db | 7798 | 0.016799 | FALSE | 0.488402 | FALSE | Photoreceptor          |
| TAGTGCA( db/db1  | db/db | 985  | 0.109534 | TRUE  | 1.934236 | FALSE |                        |
| TAGTGCA  db/db1  | db/db | 1006 | 0.048732 | FALSE | 1.579553 | FALSE | Photoreceptor          |
| TAGTGCA  db/db1  | db/db | 1197 | 0.027273 | FALSE | 1.6865   | FALSE | Photoreceptor          |
| TAGTGCA  db/db1  | db/db | 3687 | 0.017114 | FALSE | 0.72727  | FALSE | Endothelia Aterial EC  |
| TATACCTA db/db1  | db/db | 6532 | 0.026328 | FALSE | 0.450084 | FALSE | Photoreceptor          |
| TATACCTA db/db1  | db/db | 2127 | 0.027273 | FALSE | 1.205771 | FALSE | Endothelia Capillary E |
| TATACCTA db/db1  | db/db | 680  | 0.04192  | FALSE | 1.293809 | FALSE | Photoreceptor          |
| TATACCTC db/db1  | db/db | 873  | 0.115404 | TRUE  | 0.52592  | FALSE |                        |
| TATACCTC db/db1  | db/db | 3866 | 0.01981  | FALSE | 0.890457 | FALSE | Endothelia EC-C4       |
| TATACCTC db/db1  | db/db | 1587 | 0.021669 | FALSE | 1.410516 | FALSE | Endothelia Capillary E |
| TATACCTG db/db1  | db/db | 611  | 0.04192  | FALSE | 2.256607 | FALSE | Photoreceptor          |
| TATACCTG db/db1  | db/db | 5743 | 0.024534 | FALSE | 1.016354 | FALSE | Endothelia Venous EC   |
| TATACCT  db/db1  | db/db | 5526 | 0.018422 | FALSE | 0.864255 | FALSE | Endothelia Venous EC   |
| TATACCT  db/db1  | db/db | 1067 | 0.051646 | FALSE | 1.695896 | FALSE | Photoreceptor          |
| TATACCT  db/db1  | db/db | 1713 | 0.019106 | FALSE | 1.053028 | FALSE | Endothelia Capillary E |
| TATACCT  db/db1  | db/db | 2233 | 0.059406 | FALSE | 1.161197 | FALSE | Photoreceptor          |
| TATATCCA db/db1  | db/db | 3876 | 0.026796 | FALSE | 0.793279 | FALSE | Endothelia Venous EC   |
| TATATCCC db/db1  | db/db | 895  | 0.007441 | FALSE | 0.852472 | FALSE | Endothelia EC-C4       |
| TATATCCC db/db1  | db/db | 417  | 0.030318 | FALSE | 3.325399 | FALSE | Endothelia Capillary E |
| TATATCCC db/db1  | db/db | 710  | 0.046025 | FALSE | 0.822139 | FALSE | Photoreceptor          |
| TATATCCC db/db1  | db/db | 3024 | 0.024105 | FALSE | 0.790676 | FALSE | Endothelia Venous EC   |
| TATATCCG db/db1  | db/db | 669  | 0.073582 | FALSE | 10.80214 | TRUE  |                        |
| TATATCCT  db/db1 | db/db | 880  | 0.047807 | FALSE | 2.135635 | FALSE | Photoreceptor          |
| TATATCCT  db/db1 | db/db | 6739 | 0.022059 | FALSE | 0.738033 | FALSE | Photoreceptor          |
| TATATCCT  db/db1 | db/db | 447  | 0.038953 | FALSE | 1.768657 | FALSE | Endothelia Capillary E |
| TATCAGG( db/db1  | db/db | 3268 | 0.053718 | FALSE | 1.14228  | FALSE | Endothelia Venous EC   |
| TATCAGG( db/db1  | db/db | 1446 | 0.010384 | FALSE | 0.930257 | FALSE | Endothelia Capillary E |

|                 |       |      |          |       |          |       |                        |
|-----------------|-------|------|----------|-------|----------|-------|------------------------|
| TATCAGGC db/db1 | db/db | 733  | 0.103567 | TRUE  | 3.170029 | FALSE |                        |
| TATCAGGC db/db1 | db/db | 867  | 0.012303 | FALSE | 1.102676 | FALSE | Endothelia Capillary E |
| TATCAGGC db/db1 | db/db | 1957 | 0.017114 | FALSE | 0.508251 | FALSE | Photoreceptor          |
| TATCAGGC db/db1 | db/db | 782  | 0.022455 | FALSE | 0.834573 | FALSE | Photoreceptor          |
| TATCAGGC db/db1 | db/db | 5300 | 0.03313  | FALSE | 0.845646 | FALSE | Photoreceptor          |
| TATCAGGT db/db1 | db/db | 429  | 0.071958 | FALSE | 1.493679 | FALSE | Neuron                 |
| TATCAGGT db/db1 | db/db | 5197 | 0.382671 | TRUE  | 3.599609 | FALSE |                        |
| TATCAGGT db/db1 | db/db | 2303 | 0.010614 | FALSE | 1.127073 | FALSE | Endothelia Capillary E |
| TATCAGGT db/db1 | db/db | 8147 | 0.024971 | FALSE | 0.601571 | FALSE | Photoreceptor          |
| TATCCTAA db/db1 | db/db | 4742 | 0.058205 | FALSE | 0.875655 | FALSE | Photoreceptor          |
| TATCCTAA db/db1 | db/db | 7844 | 0.011081 | FALSE | 0.532029 | FALSE | Photoreceptor          |
| TATCCTAG db/db1 | db/db | 3638 | 0.122691 | TRUE  | 3.334122 | FALSE |                        |
| TATCCTAG db/db1 | db/db | 2444 | 0.008438 | FALSE | 1.326661 | FALSE | Photoreceptor          |
| TATCCTAT db/db1 | db/db | 3347 | 0.024971 | FALSE | 0.654811 | FALSE | Photoreceptor          |
| TATCCTAT db/db1 | db/db | 7460 | 0.03313  | FALSE | 0.294057 | FALSE | Photoreceptor          |
| TATCCTAT db/db1 | db/db | 3751 | 0.100845 | TRUE  | 2.46311  | FALSE |                        |
| TATCGCCC db/db1 | db/db | 1483 | 0.053718 | FALSE | 1.721656 | FALSE | Photoreceptor          |
| TATCGCCC db/db1 | db/db | 1645 | 0.082569 | FALSE | 1.713194 | FALSE | Photoreceptor          |
| TATCGCCC db/db1 | db/db | 3529 | 0.011081 | FALSE | 0.258516 | FALSE | Photoreceptor          |
| TATCGCCC db/db1 | db/db | 4160 | 0.021669 | FALSE | 0.91506  | FALSE | Endothelia EC-C4       |
| TATCGCCT db/db1 | db/db | 5715 | 0.018422 | FALSE | 0.664922 | FALSE | Photoreceptor          |
| TATCGCCT db/db1 | db/db | 502  | 0.027273 | FALSE | 1.898346 | FALSE | Photoreceptor          |
| TATCGCCT db/db1 | db/db | 580  | 0.051646 | FALSE | 2.690489 | FALSE | Endothelia Capillary E |
| TATCGCCT db/db1 | db/db | 1984 | 0.007833 | FALSE | 0.952069 | FALSE | Endothelia EC-C4       |
| TATCTGTA db/db1 | db/db | 6378 | 0.020908 | FALSE | 0.477664 | FALSE | Photoreceptor          |
| TATCTGTA db/db1 | db/db | 2816 | 0.030859 | FALSE | 1.071741 | FALSE | Photoreceptor          |
| TATCTGTA db/db1 | db/db | 512  | 0.015879 | FALSE | 2.985735 | FALSE | Muller cell            |
| TATCTGTC db/db1 | db/db | 2757 | 0.113205 | TRUE  | 3.60944  | FALSE |                        |
| TATCTGTC db/db1 | db/db | 2126 | 0.028251 | FALSE | 1.062471 | FALSE | Neuron                 |
| TATCTGTG db/db1 | db/db | 3728 | 0.035586 | FALSE | 1.037071 | FALSE | Endothelia Venous EC   |
| TATCTGTT db/db1 | db/db | 511  | 0.088776 | FALSE | 3.594769 | FALSE | Endothelia Capillary E |
| TATCTGTT db/db1 | db/db | 3592 | 0.014997 | FALSE | 1.014421 | FALSE | Endothelia Capillary E |
| TATCTTGC db/db1 | db/db | 820  | 0.039671 | FALSE | 0.754417 | FALSE | Photoreceptor          |
| TATCTTGC db/db1 | db/db | 2914 | 0.031411 | FALSE | 1.169032 | FALSE | Photoreceptor          |
| TATCTTGG db/db1 | db/db | 4734 | 0.018761 | FALSE | 0.873738 | FALSE | Photoreceptor          |
| TATCTTGG db/db1 | db/db | 1258 | 0.031411 | FALSE | 0.705211 | FALSE | Photoreceptor          |
| TATCTTGT db/db1 | db/db | 4296 | 0.049679 | FALSE | 0.779923 | FALSE | Endothelia Venous EC   |
| TATCTTGT db/db1 | db/db | 2185 | 0.046906 | FALSE | 0.900458 | FALSE | Photoreceptor          |
| TATGTTCA db/db1 | db/db | 789  | 0.070386 | FALSE | 19.38846 | TRUE  |                        |
| TATGTTCA db/db1 | db/db | 662  | 0.042704 | FALSE | 1.976632 | FALSE | Endothelia Capillary E |
| TATGTTCC db/db1 | db/db | 1637 | 0.078788 | FALSE | 1.628295 | FALSE | Photoreceptor          |
| TATGTTCC db/db1 | db/db | 2561 | 0.049679 | FALSE | 0.909545 | FALSE | Neuron                 |
| TATGTTCC db/db1 | db/db | 732  | 0.012052 | FALSE | 0.730699 | FALSE | Photoreceptor          |
| TATGTTCT db/db1 | db/db | 880  | 0.113251 | TRUE  | 4.056291 | FALSE |                        |
| TATTCCAC db/db1 | db/db | 789  | 0.046906 | FALSE | 1.167467 | FALSE | Photoreceptor          |
| TATTCCAC db/db1 | db/db | 3213 | 0.05065  | FALSE | 0.951184 | FALSE | Endothelia Venous EC   |
| TATTCCAG db/db1 | db/db | 7940 | 0.018422 | FALSE | 0.632017 | FALSE | Photoreceptor          |

|                 |       |      |          |       |          |       |                        |
|-----------------|-------|------|----------|-------|----------|-------|------------------------|
| TATTCCAG db/db1 | db/db | 2940 | 0.025416 | FALSE | 0.8932   | FALSE | Photoreceptor          |
| TATTCCAT db/db1 | db/db | 4610 | 0.021286 | FALSE | 0.89357  | FALSE | Endothelia Venous EC   |
| TATTCCAT db/db1 | db/db | 7515 | 0.445833 | TRUE  | 0.686349 | FALSE |                        |
| TATTCCAT db/db1 | db/db | 2979 | 0.013074 | FALSE | 0.839148 | FALSE | Neuron                 |
| TATTCCAT db/db1 | db/db | 1628 | 0.023266 | FALSE | 1.023764 | FALSE | Endothelia Capillary E |
| TATTGCTA db/db1 | db/db | 3739 | 0.034954 | FALSE | 0.645065 | FALSE | Photoreceptor          |
| TATTGCTA db/db1 | db/db | 4613 | 0.133788 | TRUE  | 2.196513 | FALSE |                        |
| TATTGCTA db/db1 | db/db | 675  | 0.043505 | FALSE | 2.176229 | FALSE | Photoreceptor          |
| TATTGCTC db/db1 | db/db | 3883 | 0.065957 | FALSE | 0.926321 | FALSE | Neuron                 |
| TATTGCTC db/db1 | db/db | 471  | 0.030859 | FALSE | 1.692296 | FALSE | Microglia              |
| TATTGCTC db/db1 | db/db | 2747 | 0.067388 | FALSE | 0.921588 | FALSE | Photoreceptor          |
| TATTGCTC db/db1 | db/db | 513  | 0.052669 | FALSE | 1.881901 | FALSE | Endothelia Capillary E |
| TATTGCTG db/db1 | db/db | 3471 | 0.041154 | FALSE | 1.118472 | FALSE | Photoreceptor          |
| TATTGCTG db/db1 | db/db | 5105 | 0.014997 | FALSE | 0.797347 | FALSE | Photoreceptor          |
| TATTGCTT db/db1 | db/db | 1432 | 0.027758 | FALSE | 1.364245 | FALSE | Endothelia EC-C4       |
| TATTGGG db/db1  | db/db | 1874 | 0.042704 | FALSE | 1.50033  | FALSE | Endothelia Capillary E |
| TATTGGG db/db1  | db/db | 720  | 0.041154 | FALSE | 0.684035 | FALSE | Photoreceptor          |
| TATTGGG db/db1  | db/db | 2899 | 0.016799 | FALSE | 0.842249 | FALSE | Photoreceptor          |
| TATTGGG db/db1  | db/db | 2222 | 0.023682 | FALSE | 1.205181 | FALSE | Endothelia Capillary E |
| TATTGGG db/db1  | db/db | 4059 | 0.357022 | TRUE  | 1.332645 | FALSE |                        |
| TATTGGG db/db1  | db/db | 1490 | 0.010614 | FALSE | 0.999689 | FALSE | Endothelia EC-C4       |
| TATTGGG db/db1  | db/db | 2217 | 0.046906 | FALSE | 1.076369 | FALSE | Endothelia Venous EC   |
| TATTGGG db/db1  | db/db | 2628 | 0.007833 | FALSE | 0.832928 | FALSE | Neuron                 |
| TATTCGA db/db1  | db/db | 478  | 0.038251 | FALSE | 0.598541 | FALSE | Photoreceptor          |
| TATTCGA db/db1  | db/db | 3030 | 0.031973 | FALSE | 0.795136 | FALSE | Endothelia EC-C4       |
| TATTCGC db/db1  | db/db | 6319 | 0.200401 | TRUE  | 1.896377 | FALSE |                        |
| TATTCGG db/db1  | db/db | 1110 | 0.08663  | FALSE | 8.722221 | TRUE  |                        |
| TATTCGG db/db1  | db/db | 1258 | 0.016488 | FALSE | 1.06126  | FALSE | Endothelia Aterial EC  |
| TATTCGG db/db1  | db/db | 8618 | 0.021286 | FALSE | 0.51377  | FALSE | Photoreceptor          |
| TATTCGG db/db1  | db/db | 1145 | 0.029266 | FALSE | 1.517571 | FALSE | Endothelia Aterial EC  |
| TATTCGG db/db1  | db/db | 993  | 0.252153 | TRUE  | 3.659447 | FALSE |                        |
| TCAAGAC db/db1  | db/db | 2162 | 0.130374 | TRUE  | 1.143425 | FALSE |                        |
| TCAAGAC db/db1  | db/db | 907  | 0.031973 | FALSE | 1.316947 | FALSE | Muller cell            |
| TCAAGAC db/db1  | db/db | 668  | 0.064568 | FALSE | 2.348125 | FALSE | Neuron                 |
| TCAAGAC db/db1  | db/db | 4152 | 0.026328 | FALSE | 0.773475 | FALSE | Photoreceptor          |
| TCAAGACT db/db1 | db/db | 7268 | 0.016799 | FALSE | 0.746204 | FALSE | Photoreceptor          |
| TCAAGACT db/db1 | db/db | 2163 | 0.009063 | FALSE | 0.647413 | FALSE | Endothelia EC-C4       |
| TCAAGCA db/db1  | db/db | 1691 | 0.054795 | FALSE | 1.229625 | FALSE | Photoreceptor          |
| TCAAGCA db/db1  | db/db | 2148 | 0.058205 | FALSE | 1.33805  | FALSE | Photoreceptor          |
| TCAAGCA db/db1  | db/db | 1424 | 0.013605 | FALSE | 1.674206 | FALSE | Endothelia Capillary E |
| TCAAGCA db/db1  | db/db | 4207 | 0.040404 | FALSE | 0.92848  | FALSE | Photoreceptor          |
| TCAAGCA db/db1  | db/db | 2685 | 0.013074 | FALSE | 1.183056 | FALSE | Photoreceptor          |
| TCAAGCA db/db1  | db/db | 2113 | 0.049679 | FALSE | 1.480675 | FALSE | Photoreceptor          |
| TCAAGCA db/db1  | db/db | 1759 | 0.017434 | FALSE | 1.075037 | FALSE | Endothelia Capillary E |
| TCAAGCA db/db1  | db/db | 1895 | 0.014151 | FALSE | 1.155432 | FALSE | Endothelia EC-C4       |
| TCAAGCA db/db1  | db/db | 5108 | 0.130259 | TRUE  | 1.897337 | FALSE |                        |
| TCAAGCA db/db1  | db/db | 3886 | 0.067388 | FALSE | 1.128796 | FALSE | Photoreceptor          |

|                  |       |      |          |       |          |       |                        |
|------------------|-------|------|----------|-------|----------|-------|------------------------|
| TCAAGCAC db/db1  | db/db | 7112 | 0.013876 | FALSE | 0.594033 | FALSE | Photoreceptor          |
| TCAAGCAC db/db1  | db/db | 566  | 0.052669 | FALSE | 2.150363 | FALSE | Photoreceptor          |
| TCAAGCAT db/db1  | db/db | 1101 | 0.048732 | FALSE | 1.140436 | FALSE | Photoreceptor          |
| TCAAGCAT db/db1  | db/db | 455  | 0.028251 | FALSE | 1.3097   | FALSE | Neuron                 |
| TCAAGTGA db/db1  | db/db | 1276 | 0.006317 | FALSE | 1.202241 | FALSE | Endothelia Capillary E |
| TCAAGTGC db/db1  | db/db | 3817 | 0.071958 | FALSE | 1.711895 | FALSE | Neuron                 |
| TCAAGTGC db/db1  | db/db | 6746 | 0.093319 | FALSE | 0.77924  | FALSE | Photoreceptor          |
| TCAAGTGC db/db1  | db/db | 736  | 0.164835 | TRUE  | 9.582964 | TRUE  |                        |
| TCAAGTGT db/db1  | db/db | 993  | 0.080645 | FALSE | 1.995085 | FALSE | Photoreceptor          |
| TCAATCTA db/db1  | db/db | 1450 | 0.109795 | TRUE  | 3.062527 | FALSE |                        |
| TCAATCTA db/db1  | db/db | 728  | 0.035586 | FALSE | 0.792744 | FALSE | Photoreceptor          |
| TCAATCTC db/db1  | db/db | 830  | 0.021286 | FALSE | 3.164235 | FALSE | Muller cell            |
| TCAATCTC db/db1  | db/db | 3553 | 0.025416 | FALSE | 0.612917 | FALSE | Endothelia EC-C4       |
| TCAATCTC db/db1  | db/db | 1417 | 0.034334 | FALSE | 0.666733 | FALSE | Photoreceptor          |
| TCAATCTC db/db1  | db/db | 1071 | 0.013074 | FALSE | 1.291979 | FALSE | Pericyte               |
| TCAATCTG db/db1  | db/db | 2721 | 0.04192  | FALSE | 0.809985 | FALSE | Endothelia Capillary E |
| TCAATCTG db/db1  | db/db | 7609 | 0.028251 | FALSE | 0.663276 | FALSE | Photoreceptor          |
| TCAATCTG db/db1  | db/db | 2436 | 0.018422 | FALSE | 1.28978  | FALSE | Endothelia Venous EC   |
| TCAATCTG db/db1  | db/db | 7621 | 0.034954 | FALSE | 0.71451  | FALSE | Photoreceptor          |
| TCAATCTT db/db1  | db/db | 1911 | 0.047807 | FALSE | 1.328165 | FALSE | Microglia              |
| TCAATTCA db/db1  | db/db | 1720 | 0.031973 | FALSE | 0.880174 | FALSE | Photoreceptor          |
| TCAATTCC db/db1  | db/db | 532  | 0.022857 | FALSE | 2.720141 | FALSE | Endothelia Capillary E |
| TCAATTCC db/db1  | db/db | 820  | 0.126958 | TRUE  | 4.196933 | FALSE |                        |
| TCAATTCC db/db1  | db/db | 2048 | 0.118221 | TRUE  | 1.826394 | FALSE |                        |
| TCAATTCC db/db1  | db/db | 4366 | 0.015287 | FALSE | 0.766939 | FALSE | Photoreceptor          |
| TCAATTCC db/db1  | db/db | 3280 | 0.061912 | FALSE | 1.177371 | FALSE | Photoreceptor          |
| TCAATTCCG db/db1 | db/db | 1599 | 0.126958 | TRUE  | 2.043628 | FALSE |                        |
| TCAATTCCG db/db1 | db/db | 1231 | 0.049679 | FALSE | 1.025734 | FALSE | Photoreceptor          |
| TCAATTCCG db/db1 | db/db | 1370 | 0.019106 | FALSE | 1.410166 | FALSE | Endothelia Capillary E |
| TCAATTCT db/db1  | db/db | 2482 | 0.010157 | FALSE | 0.782955 | FALSE | Photoreceptor          |
| TCAATTCT db/db1  | db/db | 8391 | 0.021669 | FALSE | 0.541744 | FALSE | Photoreceptor          |
| TCACAAGA db/db1  | db/db | 963  | 0.03313  | FALSE | 1.055352 | FALSE | Photoreceptor          |
| TCACAAGA db/db1  | db/db | 960  | 0.004598 | FALSE | 1.406958 | FALSE | Pericyte               |
| TCACAAGC db/db1  | db/db | 8753 | 0.082569 | FALSE | 0.673393 | FALSE | Photoreceptor          |
| TCACAAGC db/db1  | db/db | 543  | 0.030318 | FALSE | 5.643994 | TRUE  |                        |
| TCACAAGC db/db1  | db/db | 397  | 0.073582 | FALSE | 2.74969  | FALSE | Muller cell            |
| TCACAAGC db/db1  | db/db | 1148 | 0.088776 | FALSE | 9.725275 | TRUE  |                        |
| TCACAAGC db/db1  | db/db | 7153 | 0.228861 | TRUE  | 0.506615 | FALSE |                        |
| TCACAAGT db/db1  | db/db | 3050 | 0.018088 | FALSE | 0.616932 | FALSE | Photoreceptor          |
| TCACAAGT db/db1  | db/db | 3035 | 0.026328 | FALSE | 1.086948 | FALSE | Endothelia Capillary E |
| TCACACCA db/db1  | db/db | 1011 | 0.061912 | FALSE | 1.875067 | FALSE | Photoreceptor          |
| TCACACCA db/db1  | db/db | 829  | 0.055901 | FALSE | 0.735853 | FALSE | Photoreceptor          |
| TCACACCA db/db1  | db/db | 3599 | 0.040404 | FALSE | 0.79579  | FALSE | Endothelia EC-C4       |
| TCACACCA db/db1  | db/db | 2733 | 0.093319 | FALSE | 0.899288 | FALSE | Photoreceptor          |
| TCACACCA db/db1  | db/db | 630  | 0.088776 | FALSE | 3.388614 | FALSE | Muller cell            |
| TCACACCC db/db1  | db/db | 2498 | 0.022857 | FALSE | 0.539994 | FALSE | Photoreceptor          |
| TCACACCC db/db1  | db/db | 6821 | 0.01981  | FALSE | 0.597458 | FALSE | Photoreceptor          |

|                 |       |      |          |       |          |       |                        |
|-----------------|-------|------|----------|-------|----------|-------|------------------------|
| TCACACCC db/db1 | db/db | 1581 | 0.016799 | FALSE | 1.205225 | FALSE | Endothelia Capillary E |
| TCACACCG db/db1 | db/db | 436  | 0.08663  | FALSE | 4.141654 | FALSE | Muller cell            |
| TCACACCG db/db1 | db/db | 2361 | 0.024105 | FALSE | 0.950713 | FALSE | Endothelia Capillary E |
| TCACACCG db/db1 | db/db | 1375 | 0.063221 | FALSE | 2.04347  | FALSE | Endothelia Capillary E |
| TCACACCG db/db1 | db/db | 690  | 0.100165 | TRUE  | 1.461378 | FALSE |                        |
| TCACATTA db/db1 | db/db | 1977 | 0.024971 | FALSE | 1.094888 | FALSE | Endothelia Capillary E |
| TCACATTA db/db1 | db/db | 3262 | 0.022455 | FALSE | 1.098028 | FALSE | Photoreceptor          |
| TCACATTC db/db1 | db/db | 1298 | 0.084562 | FALSE | 1.793436 | FALSE | Photoreceptor          |
| TCACATTC db/db1 | db/db | 8610 | 0.020536 | FALSE | 0.450409 | FALSE | Photoreceptor          |
| TCACATTG db/db1 | db/db | 1089 | 0.031973 | FALSE | 1.558756 | FALSE | Photoreceptor          |
| TCACATTG db/db1 | db/db | 1182 | 0.020908 | FALSE | 1.383173 | FALSE | Photoreceptor          |
| TCACATTT db/db1 | db/db | 6583 | 0.209157 | TRUE  | 2.159728 | FALSE |                        |
| TCACGCTA db/db1 | db/db | 3267 | 0.028251 | FALSE | 0.756386 | FALSE | Photoreceptor          |
| TCACGCTA db/db1 | db/db | 771  | 0.109375 | TRUE  | 11.35225 | TRUE  |                        |
| TCACGCTA db/db1 | db/db | 1197 | 0.011561 | FALSE | 1.191864 | FALSE | Endothelia Capillary E |
| TCACGCTA db/db1 | db/db | 2319 | 0.034334 | FALSE | 1.556698 | FALSE | Photoreceptor          |
| TCACGCTC db/db1 | db/db | 2016 | 0.036232 | FALSE | 0.934525 | FALSE | Photoreceptor          |
| TCACGCTC db/db1 | db/db | 2678 | 0.061912 | FALSE | 0.953198 | FALSE | Photoreceptor          |
| TCACGCTC db/db1 | db/db | 1233 | 0.055901 | FALSE | 1.356216 | FALSE | Photoreceptor          |
| TCACGCTC db/db1 | db/db | 1271 | 0.025416 | FALSE | 1.475596 | FALSE | Endothelia Capillary E |
| TCACGCTC db/db1 | db/db | 2825 | 0.022857 | FALSE | 1.486852 | FALSE | Photoreceptor          |
| TCACGCTC db/db1 | db/db | 945  | 0.024971 | FALSE | 0.655236 | FALSE | Photoreceptor          |
| TCACGCTT db/db1 | db/db | 390  | 0.018422 | FALSE | 1.421341 | FALSE | Pericyte               |
| TCACGCTT db/db1 | db/db | 660  | 0.041154 | FALSE | 1.945004 | FALSE | Photoreceptor          |
| TCACGGG db/db1  | db/db | 3584 | 0.032546 | FALSE | 0.857756 | FALSE | Photoreceptor          |
| TCACGGG db/db1  | db/db | 3356 | 0.029266 | FALSE | 1.003185 | FALSE | Endothelia Venous EC   |
| TCACGGG db/db1  | db/db | 1327 | 0.034954 | FALSE | 1.95479  | FALSE | Endothelia Capillary E |
| TCACGGG db/db1  | db/db | 2266 | 0.057037 | FALSE | 7.366771 | TRUE  |                        |
| TCACGGG db/db1  | db/db | 387  | 0.028251 | FALSE | 2.219308 | FALSE | Photoreceptor          |
| TCACGGG db/db1  | db/db | 934  | 0.070386 | FALSE | 1.503089 | FALSE | Photoreceptor          |
| TCACGGG db/db1  | db/db | 460  | 0.023682 | FALSE | 4.072515 | FALSE | Neuron                 |
| TCACGGG db/db1  | db/db | 544  | 0.04192  | FALSE | 1.758872 | FALSE | Photoreceptor          |
| TCACGGG db/db1  | db/db | 776  | 0.039671 | FALSE | 0.634405 | FALSE | Photoreceptor          |
| TCACTATA db/db1 | db/db | 483  | 0.057037 | FALSE | 2.782488 | FALSE | Photoreceptor          |
| TCACTATA db/db1 | db/db | 2877 | 0.006683 | FALSE | 1.013068 | FALSE | Neuron                 |
| TCACTATC db/db1 | db/db | 547  | 0.048732 | FALSE | 2.192308 | FALSE | Photoreceptor          |
| TCACTATT db/db1 | db/db | 3654 | 0.013074 | FALSE | 0.848858 | FALSE | Endothelia Venous EC   |
| TCACTATT db/db1 | db/db | 4103 | 0.026796 | FALSE | 0.79469  | FALSE | Photoreceptor          |
| TCACTATT db/db1 | db/db | 1618 | 0.020908 | FALSE | 0.658941 | FALSE | Photoreceptor          |
| TCACTATT db/db1 | db/db | 4164 | 0.024534 | FALSE | 0.856952 | FALSE | Photoreceptor          |
| TCACTATT db/db1 | db/db | 1897 | 0.014997 | FALSE | 1.185308 | FALSE | Pericyte               |
| TCACTCGA db/db1 | db/db | 5596 | 0.014151 | FALSE | 0.447731 | FALSE | Photoreceptor          |
| TCACTCGA db/db1 | db/db | 1927 | 0.045165 | FALSE | 1.137141 | FALSE | Photoreceptor          |
| TCACTCGA db/db1 | db/db | 2638 | 0.020908 | FALSE | 1.238455 | FALSE | Endothelia Venous EC   |
| TCACTCGA db/db1 | db/db | 1038 | 0.046025 | FALSE | 1.329105 | FALSE | Photoreceptor          |
| TCACTCGA db/db1 | db/db | 2490 | 0.029266 | FALSE | 1.57475  | FALSE | Pericyte               |
| TCACTCGC db/db1 | db/db | 1248 | 0.007249 | FALSE | 1.174693 | FALSE | Endothelia EC-C4       |

|                 |       |      |          |       |          |       |                        |
|-----------------|-------|------|----------|-------|----------|-------|------------------------|
| TCACTCGC db/db1 | db/db | 5669 | 0.020536 | FALSE | 0.356713 | FALSE | Photoreceptor          |
| TCACTCGC db/db1 | db/db | 1364 | 0.011805 | FALSE | 0.899105 | FALSE | Endothelia EC-C4       |
| TCACTCGC db/db1 | db/db | 1979 | 0.060641 | FALSE | 1.732525 | FALSE | Photoreceptor          |
| TCACTCGC db/db1 | db/db | 2260 | 0.010846 | FALSE | 1.108789 | FALSE | Endothelia Venous EC   |
| TCACTCGC db/db1 | db/db | 2502 | 0.016799 | FALSE | 1.051728 | FALSE | Photoreceptor          |
| TCACTCGT db/db1 | db/db | 3983 | 0.064568 | FALSE | 0.908162 | FALSE | Endothelia Venous EC   |
| TCAGCAA/ db/db1 | db/db | 2041 | 0.012052 | FALSE | 0.70202  | FALSE | Neuron                 |
| TCAGCAA/ db/db1 | db/db | 617  | 0.010384 | FALSE | 3.078697 | FALSE | Pericyte               |
| TCAGCAA/ db/db1 | db/db | 677  | 0.017758 | FALSE | 2.396042 | FALSE | Neuron                 |
| TCAGCAAC db/db1 | db/db | 2195 | 0.009277 | FALSE | 1.012647 | FALSE | Endothelia EC-C4       |
| TCAGCAAC db/db1 | db/db | 2813 | 0.025416 | FALSE | 1.106949 | FALSE | Endothelia EC-C4       |
| TCAGCAAC db/db1 | db/db | 2449 | 0.031973 | FALSE | 1.133758 | FALSE | Neuron                 |
| TCAGCAAC db/db1 | db/db | 2865 | 0.042704 | FALSE | 1.176981 | FALSE | Photoreceptor          |
| TCAGCAAT db/db1 | db/db | 407  | 0.076994 | FALSE | 1.091157 | FALSE | Photoreceptor          |
| TCAGCAAT db/db1 | db/db | 4617 | 0.01981  | FALSE | 1.110235 | FALSE | Photoreceptor          |
| TCAGCAAT db/db1 | db/db | 2630 | 0.026796 | FALSE | 0.859585 | FALSE | Microglia              |
| TCAGCAAT db/db1 | db/db | 3281 | 0.007441 | FALSE | 0.982297 | FALSE | Endothelia Capillary E |
| TCAGCCTA db/db1 | db/db | 973  | 0.103567 | TRUE  | 6.2      | TRUE  |                        |
| TCAGCCTC db/db1 | db/db | 1296 | 0.007441 | FALSE | 0.970996 | FALSE | Endothelia Capillary E |
| TCAGCCTC db/db1 | db/db | 3215 | 0.054795 | FALSE | 0.930339 | FALSE | Photoreceptor          |
| TCAGCCTC db/db1 | db/db | 743  | 0.012557 | FALSE | 0.416523 | FALSE | Photoreceptor          |
| TCAGCCTC db/db1 | db/db | 1065 | 0.027758 | FALSE | 2.040183 | FALSE | Endothelia Capillary E |
| TCAGCCTC db/db1 | db/db | 6855 | 0.032546 | FALSE | 0.665709 | FALSE | Photoreceptor          |
| TCAGCCTC db/db1 | db/db | 2077 | 0.026796 | FALSE | 1.275491 | FALSE | Neuron                 |
| TCAGCCTC db/db1 | db/db | 426  | 0.026328 | FALSE | 1.425064 | FALSE | Photoreceptor          |
| TCAGCCTC db/db1 | db/db | 8655 | 0.016799 | FALSE | 0.269705 | FALSE | Photoreceptor          |
| TCAGCCTT db/db1 | db/db | 2870 | 0.143501 | TRUE  | 4.986713 | FALSE |                        |
| TCAGCCTT db/db1 | db/db | 665  | 0.061912 | FALSE | 0.466987 | FALSE | Photoreceptor          |
| TCAGCCTT db/db1 | db/db | 6700 | 0.023266 | FALSE | 0.615858 | FALSE | Photoreceptor          |
| TCAGGGC/ db/db1 | db/db | 1549 | 0.073582 | FALSE | 1.423278 | FALSE | Photoreceptor          |
| TCAGGGC/ db/db1 | db/db | 983  | 0.071958 | FALSE | 3.705485 | FALSE | Muller cell            |
| TCAGGGC/ db/db1 | db/db | 2731 | 0.030318 | FALSE | 0.703406 | FALSE | Photoreceptor          |
| TCAGGGC( db/db1 | db/db | 1578 | 0.022857 | FALSE | 1.593833 | FALSE | Endothelia Capillary E |
| TCAGGGC( db/db1 | db/db | 535  | 0.031973 | FALSE | 1.869818 | FALSE | Photoreceptor          |
| TCAGGGC( db/db1 | db/db | 827  | 0.045165 | FALSE | 1.185776 | FALSE | Photoreceptor          |
| TCAGGGC( db/db1 | db/db | 2658 | 0.017434 | FALSE | 1.006875 | FALSE | Photoreceptor          |
| TCAGGGC( db/db1 | db/db | 1159 | 0.021669 | FALSE | 1.736132 | FALSE | Endothelia EC-C4       |
| TCAGGGC( db/db1 | db/db | 839  | 0.028251 | FALSE | 1.42751  | FALSE | Endothelia Venous EC   |
| TCAGGGC[ db/db1 | db/db | 4786 | 0.023682 | FALSE | 0.906557 | FALSE | Photoreceptor          |
| TCAGGGC[ db/db1 | db/db | 700  | 0.027273 | FALSE | 1.015539 | FALSE | Photoreceptor          |
| TCAGGGC[ db/db1 | db/db | 922  | 0.041154 | FALSE | 1.644381 | FALSE | Photoreceptor          |
| TCAGGTA/ db/db1 | db/db | 4176 | 0.012557 | FALSE | 0.275911 | FALSE | Photoreceptor          |
| TCAGGTA/ db/db1 | db/db | 583  | 0.036891 | FALSE | 1.343265 | FALSE | Photoreceptor          |
| TCAGGTAC db/db1 | db/db | 4657 | 0.025868 | FALSE | 0.810982 | FALSE | Photoreceptor          |
| TCAGGTAC db/db1 | db/db | 2769 | 0.034954 | FALSE | 0.765734 | FALSE | Photoreceptor          |
| TCAGGTAC db/db1 | db/db | 397  | 0.027273 | FALSE | 1.22326  | FALSE | Photoreceptor          |
| TCAGGTAC db/db1 | db/db | 2726 | 0.082569 | FALSE | 1.423732 | FALSE | Endothelia Venous EC   |



|                 |       |      |          |       |          |       |                        |
|-----------------|-------|------|----------|-------|----------|-------|------------------------|
| TCAGGTAC db/db1 | db/db | 726  | 0.005095 | FALSE | 1.72532  | FALSE | Pericyte               |
| TCAGGTAC db/db1 | db/db | 848  | 0.018422 | FALSE | 1.043329 | FALSE | Photoreceptor          |
| TCAGGTAT db/db1 | db/db | 421  | 0.010384 | FALSE | 1.199274 | FALSE | Muller cell            |
| TCAGGTAT db/db1 | db/db | 4340 | 0.026328 | FALSE | 0.793801 | FALSE | Photoreceptor          |
| TCAGGTAT db/db1 | db/db | 3763 | 0.043505 | FALSE | 0.619142 | FALSE | Endothelia EC-C4       |
| TCAGTCCA db/db1 | db/db | 1688 | 0.091004 | FALSE | 1.538009 | FALSE | Muller cell            |
| TCAGTCCC db/db1 | db/db | 824  | 0.012052 | FALSE | 1.730291 | FALSE | Endothelia Capillary E |
| TCAGTCCC db/db1 | db/db | 4297 | 0.021286 | FALSE | 0.959747 | FALSE | Endothelia Capillary E |
| TCAGTCCC db/db1 | db/db | 2571 | 0.022857 | FALSE | 0.825078 | FALSE | Photoreceptor          |
| TCAGTCCC db/db1 | db/db | 1782 | 0.018422 | FALSE | 1.133075 | FALSE | Endothelia Capillary E |
| TCAGTGA db/db1  | db/db | 1576 | 0.045165 | FALSE | 1.905703 | FALSE | Endothelia Capillary E |
| TCAGTGA db/db1  | db/db | 1809 | 0.024971 | FALSE | 1.054555 | FALSE | Endothelia Venous EC   |
| TCAGTGAC db/db1 | db/db | 580  | 0.026796 | FALSE | 0.760367 | FALSE | Photoreceptor          |
| TCAGTGAC db/db1 | db/db | 610  | 0.088776 | FALSE | 2.354143 | FALSE | Photoreceptor          |
| TCAGTGAC db/db1 | db/db | 3414 | 0.012052 | FALSE | 0.907526 | FALSE | Endothelia Venous EC   |
| TCAGTGAC db/db1 | db/db | 6677 | 0.058205 | FALSE | 0.658024 | FALSE | Photoreceptor          |
| TCAGTGAC db/db1 | db/db | 2043 | 0.068864 | FALSE | 1.202798 | FALSE | Photoreceptor          |
| TCAGTGAC db/db1 | db/db | 5459 | 0.025868 | FALSE | 0.506105 | FALSE | Photoreceptor          |
| TCAGTGAC db/db1 | db/db | 403  | 0.023266 | FALSE | 3.5939   | FALSE | Muller cell            |
| TCAGTGAT db/db1 | db/db | 2000 | 0.041154 | FALSE | 1.100598 | FALSE | Photoreceptor          |
| TCAGTGAT db/db1 | db/db | 2373 | 0.055901 | FALSE | 0.998348 | FALSE | Photoreceptor          |
| TCAGTTTA db/db1 | db/db | 5284 | 0.058205 | FALSE | 0.90744  | FALSE | Photoreceptor          |
| TCAGTTTA db/db1 | db/db | 5586 | 0.314286 | TRUE  | 1.795001 | FALSE |                        |
| TCAGTTTC db/db1 | db/db | 1379 | 0.073582 | FALSE | 1.26711  | FALSE | Endothelia Capillary E |
| TCAGTTTG db/db1 | db/db | 492  | 0.046906 | FALSE | 3.012069 | FALSE | Muller cell            |
| TCAGTTTG db/db1 | db/db | 2454 | 0.017758 | FALSE | 1.185813 | FALSE | Endothelia Venous EC   |
| TCAGTTTT db/db1 | db/db | 819  | 0.006137 | FALSE | 2.271949 | FALSE | Pericyte               |
| TCAGTTTT db/db1 | db/db | 8310 | 0.01981  | FALSE | 0.463893 | FALSE | Photoreceptor          |
| TCAGTTTT db/db1 | db/db | 2243 | 0.060641 | FALSE | 1.074961 | FALSE | Endothelia EC-C4       |
| TCATACTA db/db1 | db/db | 3177 | 0.026328 | FALSE | 1.084716 | FALSE | Photoreceptor          |
| TCATACTA db/db1 | db/db | 3368 | 0.013605 | FALSE | 0.910704 | FALSE | Endothelia Venous EC   |
| TCATACTC db/db1 | db/db | 3830 | 0.012303 | FALSE | 0.206766 | FALSE | Photoreceptor          |
| TCATACTG db/db1 | db/db | 1829 | 0.028754 | FALSE | 1.329191 | FALSE | Pericyte               |
| TCATACTT db/db1 | db/db | 559  | 0.034334 | FALSE | 0.929353 | FALSE | Photoreceptor          |
| TCATACTT db/db1 | db/db | 930  | 0.070386 | FALSE | 1.451873 | FALSE | Photoreceptor          |
| TCATACTT db/db1 | db/db | 590  | 0.048732 | FALSE | 1.062247 | FALSE | Photoreceptor          |
| TCATATCA db/db1 | db/db | 1185 | 0.110586 | TRUE  | 0.596659 | FALSE |                        |
| TCATATCC db/db1 | db/db | 852  | 0.011081 | FALSE | 1.202813 | FALSE | Endothelia EC-C4       |
| TCATATCC db/db1 | db/db | 2472 | 0.027758 | FALSE | 0.851654 | FALSE | Photoreceptor          |
| TCATATCC db/db1 | db/db | 1430 | 0.010846 | FALSE | 1.053993 | FALSE | Endothelia Capillary E |
| TCATATCC db/db1 | db/db | 4402 | 0.023682 | FALSE | 0.699542 | FALSE | Photoreceptor          |
| TCATATCG db/db1 | db/db | 3234 | 0.038251 | FALSE | 0.910536 | FALSE | Photoreceptor          |
| TCATATCT db/db1 | db/db | 3922 | 0.018761 | FALSE | 0.963858 | FALSE | Photoreceptor          |
| TCATATCT db/db1 | db/db | 648  | 0.028251 | FALSE | 0.566024 | FALSE | Photoreceptor          |
| TCATCATA db/db1 | db/db | 8030 | 0.013074 | FALSE | 0.430477 | FALSE | Photoreceptor          |
| TCATCATC db/db1 | db/db | 732  | 0.014997 | FALSE | 1.851279 | FALSE | Photoreceptor          |
| TCATCATC db/db1 | db/db | 4893 | 0.019455 | FALSE | 0.76041  | FALSE | Photoreceptor          |

|                 |       |      |          |       |          |       |                        |
|-----------------|-------|------|----------|-------|----------|-------|------------------------|
| TCATCATG db/db1 | db/db | 4784 | 0.028251 | FALSE | 0.924138 | FALSE | Endothelia EC-C4       |
| TCATCATG db/db1 | db/db | 1031 | 0.113205 | TRUE  | 3.580097 | FALSE |                        |
| TCATCATT db/db1 | db/db | 1747 | 0.045165 | FALSE | 1.287024 | FALSE | Endothelia Capillary E |
| TCATCATT db/db1 | db/db | 603  | 0.047807 | FALSE | 3.216819 | FALSE | Muller cell            |
| TCATCCGA db/db1 | db/db | 1365 | 0.00687  | FALSE | 1.32242  | FALSE | Endothelia EC-C4       |
| TCATCCGA db/db1 | db/db | 419  | 0.059406 | FALSE | 28.08321 | TRUE  |                        |
| TCATCCGA db/db1 | db/db | 1974 | 0.080645 | FALSE | 0.831404 | FALSE | Photoreceptor          |
| TCATCCGA db/db1 | db/db | 825  | 0.070386 | FALSE | 2.07456  | FALSE | Photoreceptor          |
| TCATCCGA db/db1 | db/db | 1014 | 0.119124 | TRUE  | 1.258653 | FALSE |                        |
| TCATCCGA db/db1 | db/db | 1899 | 0.019455 | FALSE | 1.270555 | FALSE | Endothelia Aterial EC  |
| TCATCCGC db/db1 | db/db | 3766 | 0.024534 | FALSE | 0.849072 | FALSE | Photoreceptor          |
| TCATCCGC db/db1 | db/db | 5359 | 0.150727 | TRUE  | 1.554274 | FALSE |                        |
| TCATCCGC db/db1 | db/db | 935  | 0.05065  | FALSE | 0.99658  | FALSE | Photoreceptor          |
| TCATCCGT db/db1 | db/db | 1778 | 0.037564 | FALSE | 1.090742 | FALSE | Photoreceptor          |
| TCATCCGT db/db1 | db/db | 596  | 0.058205 | FALSE | 1.315338 | FALSE | Photoreceptor          |
| TCATGAG db/db1  | db/db | 407  | 0.016799 | FALSE | 4.147248 | FALSE | Photoreceptor          |
| TCATGAG db/db1  | db/db | 3548 | 0.038251 | FALSE | 1.03155  | FALSE | Photoreceptor          |
| TCATGAG db/db1  | db/db | 1568 | 0.076994 | FALSE | 1.060625 | FALSE | Photoreceptor          |
| TCATGAG db/db1  | db/db | 603  | 0.252153 | TRUE  | 13.24201 | TRUE  |                        |
| TCATGAG db/db1  | db/db | 3204 | 0.036232 | FALSE | 0.850224 | FALSE | Photoreceptor          |
| TCATGAGT db/db1 | db/db | 2825 | 0.018761 | FALSE | 1.120954 | FALSE | Endothelia Venous EC   |
| TCATGAGT db/db1 | db/db | 6528 | 0.017434 | FALSE | 0.574855 | FALSE | Photoreceptor          |
| TCATGAGT db/db1 | db/db | 2145 | 0.012557 | FALSE | 1.157203 | FALSE | Endothelia EC-C4       |
| TCATGCCA db/db1 | db/db | 1578 | 0.024534 | FALSE | 1.698572 | FALSE | Pericyte               |
| TCATGCCA db/db1 | db/db | 3602 | 0.098234 | FALSE | 0.81025  | FALSE | Neuron                 |
| TCATGCCA db/db1 | db/db | 941  | 0.095727 | FALSE | 2.792093 | FALSE | Muller cell            |
| TCATGCCC db/db1 | db/db | 5708 | 0.148377 | TRUE  | 2.121311 | FALSE |                        |
| TCATGCCC db/db1 | db/db | 5733 | 0.017434 | FALSE | 0.818152 | FALSE | Photoreceptor          |
| TCATGCCC db/db1 | db/db | 8664 | 0.012303 | FALSE | 0.591291 | FALSE | Photoreceptor          |
| TCATGCCC db/db1 | db/db | 1827 | 0.018422 | FALSE | 1.107147 | FALSE | Endothelia EC-C4       |
| TCATGGAC db/db1 | db/db | 6113 | 0.025868 | FALSE | 0.827386 | FALSE | Photoreceptor          |
| TCATGGAC db/db1 | db/db | 4320 | 0.031973 | FALSE | 1.025312 | FALSE | Photoreceptor          |
| TCATGGAC db/db1 | db/db | 1567 | 0.10565  | TRUE  | 3.246108 | FALSE |                        |
| TCATGGAT db/db1 | db/db | 2021 | 0.024105 | FALSE | 1.294486 | FALSE | Endothelia EC-C4       |
| TCATGTTA db/db1 | db/db | 788  | 0.046025 | FALSE | 0.514096 | FALSE | Photoreceptor          |
| TCATGTTA db/db1 | db/db | 7234 | 0.017758 | FALSE | 0.512083 | FALSE | Photoreceptor          |
| TCATGTTC db/db1 | db/db | 4439 | 0.032546 | FALSE | 1.00158  | FALSE | Photoreceptor          |
| TCATGTTC db/db1 | db/db | 2557 | 0.015879 | FALSE | 0.829281 | FALSE | Endothelia EC-C4       |
| TCATGTTG db/db1 | db/db | 1506 | 0.071958 | FALSE | 1.579642 | FALSE | Photoreceptor          |
| TCATGTTG db/db1 | db/db | 3111 | 0.078788 | FALSE | 1.274836 | FALSE | Photoreceptor          |
| TCATGTTG db/db1 | db/db | 4162 | 0.334395 | TRUE  | 0.790088 | FALSE |                        |
| TCATGTTG db/db1 | db/db | 459  | 0.047807 | FALSE | 2.478207 | FALSE | Endothelia Capillary E |
| TCATGTTG db/db1 | db/db | 489  | 0.078788 | FALSE | 1.872871 | FALSE | Photoreceptor          |
| TCATGTTT db/db1 | db/db | 8080 | 0.03313  | FALSE | 0.565806 | FALSE | Photoreceptor          |
| TCATGTTT db/db1 | db/db | 4016 | 0.016488 | FALSE | 0.429233 | FALSE | Photoreceptor          |
| TCATTACG db/db1 | db/db | 797  | 0.076994 | FALSE | 2.104953 | FALSE | Photoreceptor          |
| TCATTACG db/db1 | db/db | 6796 | 0.019455 | FALSE | 0.837793 | FALSE | Photoreceptor          |

|                 |       |      |          |       |          |       |                        |
|-----------------|-------|------|----------|-------|----------|-------|------------------------|
| TCATTACG db/db1 | db/db | 1137 | 0.095727 | FALSE | 7.725093 | TRUE  |                        |
| TCATTACG db/db1 | db/db | 742  | 0.103732 | TRUE  | 2.033272 | FALSE |                        |
| TCATTACT db/db1 | db/db | 1398 | 0.006499 | FALSE | 1.164161 | FALSE | Endothelia Capillary E |
| TCATTACT db/db1 | db/db | 4799 | 0.033726 | FALSE | 0.486529 | FALSE | Photoreceptor          |
| TCATTCAA db/db1 | db/db | 792  | 0.016181 | FALSE | 1.415961 | FALSE | Endothelia Capillary E |
| TCATTCAA db/db1 | db/db | 688  | 0.04192  | FALSE | 1.74355  | FALSE | Photoreceptor          |
| TCATTCAA db/db1 | db/db | 6133 | 0.411992 | TRUE  | 0.983912 | FALSE |                        |
| TCATTCAA db/db1 | db/db | 1547 | 0.013876 | FALSE | 0.940704 | FALSE | Endothelia Capillary E |
| TCATTGTA db/db1 | db/db | 1086 | 0.033726 | FALSE | 0.836473 | FALSE | Photoreceptor          |
| TCATTGTA db/db1 | db/db | 721  | 0.036891 | FALSE | 1.69361  | FALSE | Photoreceptor          |
| TCATTGTA db/db1 | db/db | 2644 | 0.008852 | FALSE | 0.885911 | FALSE | Endothelia EC-C4       |
| TCATTGTC db/db1 | db/db | 430  | 0.025868 | FALSE | 1.42549  | FALSE | Photoreceptor          |
| TCATTGTC db/db1 | db/db | 1076 | 0.054795 | FALSE | 1.308441 | FALSE | Photoreceptor          |
| TCATTGTC db/db1 | db/db | 6291 | 0.025416 | FALSE | 0.84039  | FALSE | Photoreceptor          |
| TCATTGTC db/db1 | db/db | 751  | 0.070386 | FALSE | 0.819619 | FALSE | Photoreceptor          |
| TCATTGTC db/db1 | db/db | 511  | 0.036232 | FALSE | 3.175073 | FALSE | Muller cell            |
| TCATTGTC db/db1 | db/db | 9048 | 0.020536 | FALSE | 0.353551 | FALSE | Photoreceptor          |
| TCATTGTG db/db1 | db/db | 3014 | 0.065957 | FALSE | 0.774214 | FALSE | Endothelia Venous EC   |
| TCATTGTG db/db1 | db/db | 638  | 0.010157 | FALSE | 1.802652 | FALSE | Endothelia Capillary E |
| TCATTGTT db/db1 | db/db | 1115 | 0.076994 | FALSE | 8.535896 | TRUE  |                        |
| TCATTTGA db/db1 | db/db | 811  | 0.033726 | FALSE | 1.801935 | FALSE | Photoreceptor          |
| TCATTTGA db/db1 | db/db | 1457 | 0.043505 | FALSE | 1.446395 | FALSE | Pericyte               |
| TCATTTGG db/db1 | db/db | 773  | 0.036891 | FALSE | 1.125929 | FALSE | Photoreceptor          |
| TCATTTGG db/db1 | db/db | 1738 | 0.008032 | FALSE | 1.246739 | FALSE | Photoreceptor          |
| TCATTTGG db/db1 | db/db | 2577 | 0.042704 | FALSE | 0.877506 | FALSE | Photoreceptor          |
| TCATTTGT db/db1 | db/db | 2467 | 0.016488 | FALSE | 0.478881 | FALSE | Photoreceptor          |
| TCATTTGT db/db1 | db/db | 1290 | 0.025868 | FALSE | 1.270783 | FALSE | Endothelia Capillary E |
| TCCACCAC db/db1 | db/db | 4475 | 0.016488 | FALSE | 0.899763 | FALSE | Endothelia Venous EC   |
| TCCACCAC db/db1 | db/db | 2839 | 0.03313  | FALSE | 0.784406 | FALSE | Photoreceptor          |
| TCCACCAG db/db1 | db/db | 1641 | 0.038953 | FALSE | 1.604502 | FALSE | Photoreceptor          |
| TCCACGTA db/db1 | db/db | 5135 | 0.024105 | FALSE | 0.817863 | FALSE | Photoreceptor          |
| TCCACGTA db/db1 | db/db | 2269 | 0.015581 | FALSE | 0.805924 | FALSE | Endothelia Venous EC   |
| TCCACGTA db/db1 | db/db | 942  | 0.052669 | FALSE | 3.488944 | FALSE | Muller cell            |
| TCCACGTA db/db1 | db/db | 1370 | 0.012303 | FALSE | 1.31454  | FALSE | Endothelia Capillary E |
| TCCACGTA db/db1 | db/db | 6658 | 0.026328 | FALSE | 0.477356 | FALSE | Photoreceptor          |
| TCCACGTC db/db1 | db/db | 9722 | 0.012557 | FALSE | 0.480194 | FALSE | Photoreceptor          |
| TCCACGTC db/db1 | db/db | 2340 | 0.024534 | FALSE | 0.708699 | FALSE | Endothelia EC-C4       |
| TCCACGTC db/db1 | db/db | 792  | 0.013338 | FALSE | 1.460652 | FALSE | Endothelia Aterial EC  |
| TCCACGTT db/db1 | db/db | 2239 | 0.018761 | FALSE | 0.904317 | FALSE | Endothelia Capillary E |
| TCCACGTT db/db1 | db/db | 1133 | 0.045165 | FALSE | 0.573984 | FALSE | Photoreceptor          |
| TCCACGTT db/db1 | db/db | 2939 | 0.036891 | FALSE | 0.855359 | FALSE | Photoreceptor          |
| TCCACGTT db/db1 | db/db | 2977 | 0.022857 | FALSE | 0.917171 | FALSE | Endothelia EC-C4       |
| TCCAGAA db/db1  | db/db | 3755 | 0.150727 | TRUE  | 1.502772 | FALSE |                        |
| TCCAGAA db/db1  | db/db | 1459 | 0.029787 | FALSE | 1.94967  | FALSE | Endothelia Capillary E |
| TCCAGAA db/db1  | db/db | 872  | 0.035586 | FALSE | 1.258596 | FALSE | Photoreceptor          |
| TCCAGAAC db/db1 | db/db | 7517 | 0.019455 | FALSE | 0.48268  | FALSE | Photoreceptor          |
| TCCAGAAC db/db1 | db/db | 3342 | 0.041154 | FALSE | 1.124084 | FALSE | Photoreceptor          |

|                  |       |      |          |       |          |       |                        |
|------------------|-------|------|----------|-------|----------|-------|------------------------|
| TCCAGAAC db/db1  | db/db | 2007 | 0.013605 | FALSE | 1.358319 | FALSE | Endothelia Capillary E |
| TCCAGAAC db/db1  | db/db | 1870 | 0.028251 | FALSE | 1.093287 | FALSE | Endothelia Capillary E |
| TCCAGAAAT db/db1 | db/db | 926  | 0.031411 | FALSE | 1.85111  | FALSE | Photoreceptor          |
| TCCATCGA db/db1  | db/db | 2613 | 0.026796 | FALSE | 1.086141 | FALSE | Endothelia Capillary E |
| TCCATCGA db/db1  | db/db | 4933 | 0.031973 | FALSE | 0.844439 | FALSE | Photoreceptor          |
| TCCATCGC db/db1  | db/db | 2672 | 0.013074 | FALSE | 0.488397 | FALSE | Endothelia Capillary E |
| TCCATCGC db/db1  | db/db | 1301 | 0.015287 | FALSE | 0.917493 | FALSE | Pericyte               |
| TCCATCGT db/db1  | db/db | 3260 | 0.091004 | FALSE | 7.434609 | TRUE  |                        |
| TCCATCGT db/db1  | db/db | 515  | 0.016488 | FALSE | 1.21337  | FALSE | Photoreceptor          |
| TCCATGCA db/db1  | db/db | 581  | 0.013876 | FALSE | 2.755603 | FALSE | Neuron                 |
| TCCATGCC db/db1  | db/db | 3408 | 0.019455 | FALSE | 0.800799 | FALSE | Endothelia Venous EC   |
| TCCATGCC db/db1  | db/db | 5303 | 0.022857 | FALSE | 0.584271 | FALSE | Photoreceptor          |
| TCCATGCC db/db1  | db/db | 1541 | 0.017434 | FALSE | 1.071471 | FALSE | Endothelia Capillary E |
| TCCATGCC db/db1  | db/db | 738  | 0.016488 | FALSE | 0.539686 | FALSE | Photoreceptor          |
| TCCATGCC db/db1  | db/db | 399  | 0.093319 | FALSE | 2.947903 | FALSE | Muller cell            |
| TCCATGCC db/db1  | db/db | 3805 | 0.010384 | FALSE | 0.894224 | FALSE | Endothelia Venous EC   |
| TCCATGCC db/db1  | db/db | 2188 | 0.184701 | TRUE  | 6.186498 | TRUE  |                        |
| TCCATGCT db/db1  | db/db | 366  | 0.022059 | FALSE | 2.615431 | FALSE | Endothelia Capillary E |
| TCCCACAA db/db1  | db/db | 488  | 0.028754 | FALSE | 3.078953 | FALSE | Photoreceptor          |
| TCCCACAA db/db1  | db/db | 2818 | 0.119568 | TRUE  | 1.260644 | FALSE |                        |
| TCCCACAA db/db1  | db/db | 3047 | 0.100845 | TRUE  | 1.707074 | FALSE |                        |
| TCCCACAA db/db1  | db/db | 6895 | 0.026796 | FALSE | 0.707797 | FALSE | Photoreceptor          |
| TCCCACAC db/db1  | db/db | 424  | 0.029787 | FALSE | 2.685692 | FALSE | Photoreceptor          |
| TCCCACAC db/db1  | db/db | 1419 | 0.01981  | FALSE | 1.1807   | FALSE | Endothelia Capillary E |
| TCCCACAC db/db1  | db/db | 4379 | 0.020536 | FALSE | 0.729576 | FALSE | Endothelia Capillary E |
| TCCCACAC db/db1  | db/db | 432  | 0.040404 | FALSE | 3.015206 | FALSE | Endothelia Capillary E |
| TCCCACAC db/db1  | db/db | 686  | 0.043505 | FALSE | 1.84472  | FALSE | Photoreceptor          |
| TCCCACAC db/db1  | db/db | 6011 | 0.020908 | FALSE | 0.895736 | FALSE | Photoreceptor          |
| TCCCACAG db/db1  | db/db | 3176 | 0.018422 | FALSE | 1.044328 | FALSE | Endothelia Capillary E |
| TCCCACAG db/db1  | db/db | 423  | 0.029787 | FALSE | 3.345795 | FALSE | Photoreceptor          |
| TCCCACAG db/db1  | db/db | 4768 | 0.070386 | FALSE | 0.817441 | FALSE | Endothelia Aterial EC  |
| TCCCACAG db/db1  | db/db | 516  | 0.106408 | TRUE  | 4.674221 | FALSE |                        |
| TCCCACAG db/db1  | db/db | 1992 | 0.107669 | TRUE  | 2.987013 | FALSE |                        |
| TCCCACAT db/db1  | db/db | 2056 | 0.031973 | FALSE | 1.36684  | FALSE | Photoreceptor          |
| TCCCAGTA db/db1  | db/db | 3366 | 0.019106 | FALSE | 0.989506 | FALSE | Photoreceptor          |
| TCCCAGTA db/db1  | db/db | 2106 | 0.019106 | FALSE | 1.09005  | FALSE | Endothelia Capillary E |
| TCCCAGTA db/db1  | db/db | 4720 | 0.042704 | FALSE | 1.020793 | FALSE | Photoreceptor          |
| TCCCAGTC db/db1  | db/db | 7795 | 0.014997 | FALSE | 0.589905 | FALSE | Photoreceptor          |
| TCCCAGTC db/db1  | db/db | 558  | 0.067388 | FALSE | 2.629219 | FALSE | Endothelia Capillary E |
| TCCCAGTT db/db1  | db/db | 4348 | 0.017114 | FALSE | 0.883162 | FALSE | Photoreceptor          |
| TCCCATGA db/db1  | db/db | 2447 | 0.009277 | FALSE | 1.077954 | FALSE | Endothelia Capillary E |
| TCCCATGA db/db1  | db/db | 4078 | 0.034334 | FALSE | 0.944046 | FALSE | Endothelia EC-C4       |
| TCCCATGA db/db1  | db/db | 2273 | 0.008234 | FALSE | 1.43742  | FALSE | Photoreceptor          |
| TCCCATGC db/db1  | db/db | 3041 | 0.098234 | FALSE | 1.479868 | FALSE | Neuron                 |
| TCCCATGC db/db1  | db/db | 604  | 0.026328 | FALSE | 1.275372 | FALSE | Photoreceptor          |
| TCCCATGC db/db1  | db/db | 3072 | 0.038953 | FALSE | 1.131914 | FALSE | Neuron                 |
| TCCCATGT db/db1  | db/db | 3477 | 0.040404 | FALSE | 1.10592  | FALSE | Endothelia Venous EC   |

|                 |       |      |          |       |          |       |                        |
|-----------------|-------|------|----------|-------|----------|-------|------------------------|
| TCCCATGT db/db1 | db/db | 2731 | 0.028754 | FALSE | 1.227419 | FALSE | Pericyte               |
| TCCCATGT db/db1 | db/db | 1055 | 0.027273 | FALSE | 1.485433 | FALSE | Endothelia Capillary E |
| TCCGAAA db/db1  | db/db | 3738 | 0.022857 | FALSE | 0.988442 | FALSE | Endothelia Venous EC   |
| TCCGAAA db/db1  | db/db | 3365 | 0.009493 | FALSE | 0.76617  | FALSE | Endothelia Venous EC   |
| TCCGAAA db/db1  | db/db | 7257 | 0.026796 | FALSE | 0.62659  | FALSE | Photoreceptor          |
| TCCGAAAC db/db1 | db/db | 822  | 0.053718 | FALSE | 1.373559 | FALSE | Photoreceptor          |
| TCCGAAAC db/db1 | db/db | 2328 | 0.033726 | FALSE | 0.784621 | FALSE | Photoreceptor          |
| TCCGAAAC db/db1 | db/db | 840  | 0.039671 | FALSE | 1.477375 | FALSE | Photoreceptor          |
| TCCGAAAC db/db1 | db/db | 3985 | 0.252153 | TRUE  | 1.80778  | FALSE |                        |
| TCCGATCA db/db1 | db/db | 4216 | 0.020908 | FALSE | 0.640594 | FALSE | Photoreceptor          |
| TCCGATCA db/db1 | db/db | 4702 | 0.024534 | FALSE | 0.6766   | FALSE | Photoreceptor          |
| TCCGATCC db/db1 | db/db | 3777 | 0.018761 | FALSE | 0.79893  | FALSE | Endothelia EC-C4       |
| TCCGATCC db/db1 | db/db | 5368 | 0.03313  | FALSE | 1.079562 | FALSE | Photoreceptor          |
| TCCGATCC db/db1 | db/db | 2296 | 0.013074 | FALSE | 0.981845 | FALSE | Endothelia Capillary E |
| TCCGATCC db/db1 | db/db | 796  | 0.024105 | FALSE | 1.4099   | FALSE | Endothelia Capillary E |
| TCCGATCC db/db1 | db/db | 1759 | 0.060641 | FALSE | 1.315883 | FALSE | Endothelia Venous EC   |
| TCCGATCT db/db1 | db/db | 2425 | 0.106646 | TRUE  | 2.564103 | FALSE |                        |
| TCCGGGA db/db1  | db/db | 2791 | 0.060641 | FALSE | 1.244529 | FALSE | Endothelia Venous EC   |
| TCCGGGA db/db1  | db/db | 4230 | 0.038953 | FALSE | 1.104708 | FALSE | Endothelia Venous EC   |
| TCCGGGA db/db1  | db/db | 2117 | 0.051646 | FALSE | 1.392468 | FALSE | Neuron                 |
| TCCGGGA db/db1  | db/db | 2815 | 0.063221 | FALSE | 8.415361 | TRUE  |                        |
| TCCGGGA db/db1  | db/db | 4986 | 0.039671 | FALSE | 0.915556 | FALSE | Endothelia Venous EC   |
| TCCGGGA db/db1  | db/db | 2004 | 0.014711 | FALSE | 1.070333 | FALSE | Endothelia Capillary E |
| TCCGGGA db/db1  | db/db | 400  | 0.020908 | FALSE | 2.938081 | FALSE | Photoreceptor          |
| TCCGGGA db/db1  | db/db | 577  | 0.014429 | FALSE | 3.400061 | FALSE | Endothelia Capillary E |
| TCCGGGA db/db1  | db/db | 3068 | 0.052669 | FALSE | 1.153596 | FALSE | Endothelia Aterial EC  |
| TCCGGGA db/db1  | db/db | 772  | 0.028754 | FALSE | 1.125015 | FALSE | Photoreceptor          |
| TCCGGGA db/db1  | db/db | 1171 | 0.08663  | FALSE | 6.834336 | TRUE  |                        |
| TCCGGGA db/db1  | db/db | 2086 | 0.073582 | FALSE | 1.052957 | FALSE | Photoreceptor          |
| TCCGGGA db/db1  | db/db | 3118 | 0.019455 | FALSE | 0.532706 | FALSE | Photoreceptor          |
| TCCGTGTC db/db1 | db/db | 8167 | 0.357022 | TRUE  | 1.194516 | FALSE |                        |
| TCCGTGTC db/db1 | db/db | 3374 | 0.054795 | FALSE | 1.25072  | FALSE | Endothelia Venous EC   |
| TCCGTGTC db/db1 | db/db | 2950 | 0.071958 | FALSE | 1.444514 | FALSE | Photoreceptor          |
| TCCGTGTT db/db1 | db/db | 3453 | 0.040404 | FALSE | 0.873563 | FALSE | Endothelia Venous EC   |
| TCCGTGTT db/db1 | db/db | 2193 | 0.040404 | FALSE | 0.995686 | FALSE | Photoreceptor          |
| TCCGTGTT db/db1 | db/db | 666  | 0.040404 | FALSE | 1.01916  | FALSE | Photoreceptor          |
| TCCTAATA db/db1 | db/db | 1473 | 0.051646 | FALSE | 1.371186 | FALSE | Pericyte               |
| TCCTAATC db/db1 | db/db | 935  | 0.038953 | FALSE | 2.11684  | FALSE | Photoreceptor          |
| TCCTAATG db/db1 | db/db | 3256 | 0.130259 | TRUE  | 0.813008 | FALSE |                        |
| TCCTAATG db/db1 | db/db | 1095 | 0.036232 | FALSE | 1.107426 | FALSE | Muller cell            |
| TCCTAATG db/db1 | db/db | 2978 | 0.029266 | FALSE | 0.615249 | FALSE | Photoreceptor          |
| TCCTAATG db/db1 | db/db | 622  | 0.017758 | FALSE | 0.446293 | FALSE | Photoreceptor          |
| TCCTAATG db/db1 | db/db | 2540 | 0.024534 | FALSE | 1.000715 | FALSE | Endothelia Venous EC   |
| TCCTAATT db/db1 | db/db | 808  | 0.053718 | FALSE | 4.192976 | FALSE | Muller cell            |
| TCCTAATT db/db1 | db/db | 4983 | 0.016799 | FALSE | 0.454837 | FALSE | Photoreceptor          |
| TCCTCCCA db/db1 | db/db | 2664 | 0.209157 | TRUE  | 2.714259 | FALSE |                        |
| TCCTCCCA db/db1 | db/db | 4911 | 0.038953 | FALSE | 0.830168 | FALSE | Endothelia EC-C4       |

|                 |       |      |          |       |          |       |                         |
|-----------------|-------|------|----------|-------|----------|-------|-------------------------|
| TCCTCCCC db/db1 | db/db | 4001 | 0.011805 | FALSE | 0.818827 | FALSE | Endothelia Venous EC    |
| TCCTCCCT db/db1 | db/db | 904  | 0.063221 | FALSE | 1.762974 | FALSE | Endothelia Capillary EC |
| TCCTCCCT db/db1 | db/db | 5827 | 0.014151 | FALSE | 0.586675 | FALSE | Photoreceptor           |
| TCCTCCCT db/db1 | db/db | 5280 | 0.014429 | FALSE | 0.747173 | FALSE | Endothelia Capillary EC |
| TCCTCCCT db/db1 | db/db | 3360 | 0.047807 | FALSE | 1.636593 | FALSE | Neuron                  |
| TCCTCCCT db/db1 | db/db | 1311 | 0.030318 | FALSE | 0.747585 | FALSE | Photoreceptor           |
| TCCTCGAA db/db1 | db/db | 495  | 0.060641 | FALSE | 2.485721 | FALSE | Endothelia Capillary EC |
| TCCTCGAC db/db1 | db/db | 2283 | 0.046906 | FALSE | 1.405328 | FALSE | Photoreceptor           |
| TCCTCGAC db/db1 | db/db | 4072 | 0.01981  | FALSE | 0.836735 | FALSE | Endothelia EC-C4        |
| TCCTCGAC db/db1 | db/db | 1426 | 0.084562 | FALSE | 1.126775 | FALSE | Pericyte                |
| TCCTCGAT db/db1 | db/db | 3461 | 0.019106 | FALSE | 1.237127 | FALSE | Endothelia EC-C4        |
| TCCTCGAT db/db1 | db/db | 1395 | 0.047807 | FALSE | 0.8053   | FALSE | Photoreceptor           |
| TCCTCGAT db/db1 | db/db | 2431 | 0.011319 | FALSE | 0.885355 | FALSE | Endothelia EC-C4        |
| TCCTCGAT db/db1 | db/db | 4723 | 0.656627 | TRUE  | 2.216551 | FALSE |                         |
| TCCTCTTC db/db1 | db/db | 4611 | 0.039671 | FALSE | 0.572147 | FALSE | Endothelia EC-C4        |
| TCCTCTTC db/db1 | db/db | 7048 | 0.028251 | FALSE | 0.693346 | FALSE | Photoreceptor           |
| TCCTCTTC db/db1 | db/db | 915  | 0.012814 | FALSE | 0.799946 | FALSE | Photoreceptor           |
| TCCTCTTC db/db1 | db/db | 376  | 0.013605 | FALSE | 3.579113 | FALSE | Muller cell             |
| TCCTCTTC db/db1 | db/db | 6123 | 0.016799 | FALSE | 0.775135 | FALSE | Photoreceptor           |
| TCCTCTTG db/db1 | db/db | 2137 | 0.004275 | FALSE | 0.894585 | FALSE | Neuron                  |
| TCCTCTTT db/db1 | db/db | 1486 | 0.027273 | FALSE | 1.560186 | FALSE | Endothelia EC-C4        |
| TCCTCTTT db/db1 | db/db | 2743 | 0.04192  | FALSE | 0.857925 | FALSE | Endothelia Venous EC    |
| TCCTGCAA db/db1 | db/db | 930  | 0.016488 | FALSE | 1.561991 | FALSE | Endothelia Capillary EC |
| TCCTGCAA db/db1 | db/db | 1885 | 0.036891 | FALSE | 1.416955 | FALSE | Endothelia Capillary EC |
| TCCTGCAA db/db1 | db/db | 4446 | 0.01981  | FALSE | 0.491848 | FALSE | Photoreceptor           |
| TCCTGCAA db/db1 | db/db | 3116 | 0.046025 | FALSE | 0.86541  | FALSE | Photoreceptor           |
| TCCTGCAA db/db1 | db/db | 804  | 0.030859 | FALSE | 1.680506 | FALSE | Endothelia Capillary EC |
| TCCTGCAC db/db1 | db/db | 2210 | 0.019106 | FALSE | 1.252051 | FALSE | Endothelia Capillary EC |
| TCCTGCAC db/db1 | db/db | 434  | 0.098234 | FALSE | 3.224497 | FALSE | Pericyte                |
| TCCTGCAC db/db1 | db/db | 1298 | 0.017114 | FALSE | 1.215951 | FALSE | Endothelia Capillary EC |
| TCCTGCAT db/db1 | db/db | 3522 | 0.018088 | FALSE | 0.395008 | FALSE | Photoreceptor           |
| TCCTGCAT db/db1 | db/db | 716  | 0.065957 | FALSE | 2.30593  | FALSE | Endothelia Aterial EC   |
| TCCTGCAT db/db1 | db/db | 642  | 0.021286 | FALSE | 0.144531 | FALSE | Photoreceptor           |
| TCCTGCAT db/db1 | db/db | 3915 | 0.023266 | FALSE | 0.716315 | FALSE | Photoreceptor           |
| TCCTTCTA db/db1 | db/db | 549  | 0.032546 | FALSE | 3.276841 | FALSE | Endothelia Capillary EC |
| TCCTTCTA db/db1 | db/db | 489  | 0.01981  | FALSE | 1.906588 | FALSE | Pericyte                |
| TCCTTCTA db/db1 | db/db | 1061 | 0.033726 | FALSE | 1.309879 | FALSE | Photoreceptor           |
| TCCTTCTA db/db1 | db/db | 2883 | 0.038251 | FALSE | 0.959411 | FALSE | Photoreceptor           |
| TCCTTCTA db/db1 | db/db | 4994 | 0.016181 | FALSE | 0.701486 | FALSE | Photoreceptor           |
| TCCTTCTC db/db1 | db/db | 2280 | 0.010614 | FALSE | 1.287335 | FALSE | Neuron                  |
| TCCTTCTG db/db1 | db/db | 989  | 0.046906 | FALSE | 1.151308 | FALSE | Photoreceptor           |
| TCCTTCTG db/db1 | db/db | 1075 | 0.028754 | FALSE | 1.382229 | FALSE | Photoreceptor           |
| TCCTTCTG db/db1 | db/db | 3460 | 0.023682 | FALSE | 0.478539 | FALSE | Photoreceptor           |
| TCCTTCTT db/db1 | db/db | 6738 | 0.017114 | FALSE | 0.530267 | FALSE | Photoreceptor           |
| TCCTTCTT db/db1 | db/db | 2967 | 0.029266 | FALSE | 0.964879 | FALSE | Endothelia Capillary EC |
| TCCTTTCA db/db1 | db/db | 6283 | 0.022455 | FALSE | 0.664208 | FALSE | Photoreceptor           |
| TCCTTTCA db/db1 | db/db | 2584 | 0.025868 | FALSE | 1.01526  | FALSE | Endothelia Capillary EC |

|                 |       |      |          |       |          |       |                        |
|-----------------|-------|------|----------|-------|----------|-------|------------------------|
| TCCTTTCC db/db1 | db/db | 1009 | 0.143501 | TRUE  | 5.656697 | TRUE  |                        |
| TCCTTTCC db/db1 | db/db | 2229 | 0.009712 | FALSE | 0.801925 | FALSE | Neuron                 |
| TCCTTTCC db/db1 | db/db | 780  | 0.058205 | FALSE | 1.639006 | FALSE | Endothelia Capillary E |
| TCCTTTCT db/db1 | db/db | 2747 | 0.013074 | FALSE | 1.09565  | FALSE | Endothelia Capillary E |
| TCCTTTCT db/db1 | db/db | 4913 | 0.023682 | FALSE | 0.778903 | FALSE | Photoreceptor          |
| TCCTTTCT db/db1 | db/db | 1714 | 0.071958 | FALSE | 5.921976 | TRUE  |                        |
| TCCTTTCT db/db1 | db/db | 2307 | 0.009712 | FALSE | 1.071998 | FALSE | Endothelia Capillary E |
| TCCTTTCT db/db1 | db/db | 1427 | 0.014151 | FALSE | 0.643676 | FALSE | Photoreceptor          |
| TCGAACA db/db1  | db/db | 1456 | 0.013338 | FALSE | 1.114113 | FALSE | Pericyte               |
| TCGAACA db/db1  | db/db | 2236 | 0.030859 | FALSE | 0.862907 | FALSE | Photoreceptor          |
| TCGAACA db/db1  | db/db | 458  | 0.018761 | FALSE | 2.450307 | FALSE | Muller cell            |
| TCGAACA db/db1  | db/db | 978  | 0.015287 | FALSE | 1.895543 | FALSE | Endothelia Capillary E |
| TCGAACA db/db1  | db/db | 868  | 0.036891 | FALSE | 0.811244 | FALSE | Photoreceptor          |
| TCGAACA db/db1  | db/db | 1072 | 0.073582 | FALSE | 10.1889  | TRUE  |                        |
| TCGAACA db/db1  | db/db | 2914 | 0.011319 | FALSE | 1.266372 | FALSE | Photoreceptor          |
| TCGAACAT db/db1 | db/db | 4668 | 0.028251 | FALSE | 0.873566 | FALSE | Photoreceptor          |
| TCGAACAT db/db1 | db/db | 8179 | 0.013876 | FALSE | 0.354812 | FALSE | Photoreceptor          |
| TCGAAGT db/db1  | db/db | 796  | 0.059406 | FALSE | 0.658905 | FALSE | Photoreceptor          |
| TCGAAGT db/db1  | db/db | 3966 | 0.037564 | FALSE | 0.645785 | FALSE | Endothelia Venous EC   |
| TCGAAGT db/db1  | db/db | 5487 | 0.130374 | TRUE  | 2.405646 | FALSE |                        |
| TCGAAGT db/db1  | db/db | 744  | 0.028251 | FALSE | 1.054263 | FALSE | Endothelia Aterial EC  |
| TCGAAGT db/db1  | db/db | 1582 | 0.030859 | FALSE | 1.320096 | FALSE | Photoreceptor          |
| TCGAAGT db/db1  | db/db | 835  | 0.125386 | TRUE  | 0.892193 | FALSE |                        |
| TCGAAGT db/db1  | db/db | 2097 | 0.014997 | FALSE | 1.111573 | FALSE | Endothelia EC-C4       |
| TCGAAGT db/db1  | db/db | 2671 | 0.006317 | FALSE | 1.044558 | FALSE | Neuron                 |
| TCGACCTA db/db1 | db/db | 4200 | 0.03313  | FALSE | 0.994471 | FALSE | Endothelia EC-C4       |
| TCGACCTA db/db1 | db/db | 4246 | 0.01981  | FALSE | 0.929329 | FALSE | Photoreceptor          |
| TCGACCTA db/db1 | db/db | 1930 | 0.011081 | FALSE | 0.852739 | FALSE | Endothelia Capillary E |
| TCGACCTC db/db1 | db/db | 3711 | 0.019106 | FALSE | 0.5103   | FALSE | Photoreceptor          |
| TCGACCTC db/db1 | db/db | 735  | 0.051646 | FALSE | 7.234433 | TRUE  |                        |
| TCGACCTC db/db1 | db/db | 1069 | 0.036891 | FALSE | 2.060608 | FALSE | Endothelia Capillary E |
| TCGACCTC db/db1 | db/db | 8335 | 0.012814 | FALSE | 0.596885 | FALSE | Photoreceptor          |
| TCGACCTT db/db1 | db/db | 623  | 0.018422 | FALSE | 0.403804 | FALSE | Photoreceptor          |
| TCGACCTT db/db1 | db/db | 6667 | 0.485327 | TRUE  | 2.021651 | FALSE |                        |
| TCGACCTT db/db1 | db/db | 8895 | 0.011561 | FALSE | 0.538365 | FALSE | Photoreceptor          |
| TCGACCTT db/db1 | db/db | 3028 | 0.023682 | FALSE | 0.5473   | FALSE | Photoreceptor          |
| TCGACGG db/db1  | db/db | 4204 | 0.091004 | FALSE | 0.98554  | FALSE | Photoreceptor          |
| TCGACGG db/db1  | db/db | 1915 | 0.038251 | FALSE | 0.39215  | FALSE | Photoreceptor          |
| TCGACGG db/db1  | db/db | 779  | 0.064568 | FALSE | 1.961655 | FALSE | Photoreceptor          |
| TCGACGG db/db1  | db/db | 763  | 0.065957 | FALSE | 2.175003 | FALSE | Photoreceptor          |
| TCGACGG db/db1  | db/db | 421  | 0.098234 | FALSE | 4.085803 | FALSE | Muller cell            |
| TCGACGG db/db1  | db/db | 3183 | 0.009063 | FALSE | 0.857613 | FALSE | Endothelia Venous EC   |
| TCGACGG db/db1  | db/db | 1754 | 0.019455 | FALSE | 0.923242 | FALSE | Endothelia EC-C4       |
| TCGACGG db/db1  | db/db | 903  | 0.005958 | FALSE | 1.636591 | FALSE | Pericyte               |
| TCGACGG db/db1  | db/db | 8044 | 0.063221 | FALSE | 0.60347  | FALSE | Photoreceptor          |
| TCGACGG db/db1  | db/db | 910  | 0.095727 | FALSE | 1.817688 | FALSE | Photoreceptor          |
| TCGACGG db/db1  | db/db | 1929 | 0.042704 | FALSE | 1.190454 | FALSE | Endothelia Capillary E |

|                 |       |      |          |       |          |       |                         |
|-----------------|-------|------|----------|-------|----------|-------|-------------------------|
| TCGACGGT db/db1 | db/db | 2763 | 0.046906 | FALSE | 1.398261 | FALSE | Photoreceptor           |
| TCGATTTA db/db1 | db/db | 970  | 0.013876 | FALSE | 1.475614 | FALSE | Endothelia Capillary EC |
| TCGATTTT db/db1 | db/db | 2017 | 0.148319 | TRUE  | 2.304915 | FALSE |                         |
| TCGATTTT db/db1 | db/db | 1116 | 0.019455 | FALSE | 1.618747 | FALSE | Pericyte                |
| TCGATTTG db/db1 | db/db | 7354 | 0.025868 | FALSE | 0.616776 | FALSE | Photoreceptor           |
| TCGATTTG db/db1 | db/db | 851  | 0.068864 | FALSE | 0.858974 | FALSE | Photoreceptor           |
| TCGATTTT db/db1 | db/db | 6910 | 0.020171 | FALSE | 0.528477 | FALSE | Photoreceptor           |
| TCGATTTT db/db1 | db/db | 2715 | 0.109375 | TRUE  | 4.483142 | FALSE |                         |
| TCGCACTA db/db1 | db/db | 154  | 0.108718 | TRUE  | 0.142694 | FALSE |                         |
| TCGCACTA db/db1 | db/db | 2054 | 0.024534 | FALSE | 0.830165 | FALSE | Photoreceptor           |
| TCGCACTG db/db1 | db/db | 1801 | 0.010614 | FALSE | 1.476261 | FALSE | Photoreceptor           |
| TCGCACTG db/db1 | db/db | 1400 | 0.10565  | TRUE  | 4.019574 | FALSE |                         |
| TCGCACTT db/db1 | db/db | 2343 | 0.014429 | FALSE | 0.242085 | FALSE | Photoreceptor           |
| TCGCAGG/ db/db1 | db/db | 997  | 0.137569 | TRUE  | 1.491086 | FALSE |                         |
| TCGCAGG/ db/db1 | db/db | 672  | 0.119124 | TRUE  | 4.43459  | FALSE |                         |
| TCGCAGG/ db/db1 | db/db | 7457 | 0.032546 | FALSE | 0.695906 | FALSE | Photoreceptor           |
| TCGCAGG( db/db1 | db/db | 1032 | 0.033726 | FALSE | 0.871632 | FALSE | Photoreceptor           |
| TCGCAGG( db/db1 | db/db | 2370 | 0.025868 | FALSE | 1.307504 | FALSE | Endothelia Capillary EC |
| TCGCAGG( db/db1 | db/db | 544  | 0.071958 | FALSE | 2.306945 | FALSE | Photoreceptor           |
| TCGCAGG( db/db1 | db/db | 4029 | 0.065957 | FALSE | 1.092451 | FALSE | Photoreceptor           |
| TCGCAGGT db/db1 | db/db | 1005 | 0.012814 | FALSE | 1.299136 | FALSE | Pericyte                |
| TCGCTCAA db/db1 | db/db | 3308 | 0.023682 | FALSE | 0.895638 | FALSE | Endothelia Capillary EC |
| TCGCTCAA db/db1 | db/db | 2206 | 0.018422 | FALSE | 0.950577 | FALSE | Photoreceptor           |
| TCGCTCAA db/db1 | db/db | 1987 | 0.028754 | FALSE | 1.062986 | FALSE | Endothelia Capillary EC |
| TCGCTCAC db/db1 | db/db | 8547 | 0.022455 | FALSE | 0.449279 | FALSE | Photoreceptor           |
| TCGCTCAC db/db1 | db/db | 2348 | 0.035586 | FALSE | 1.066028 | FALSE | Endothelia Venous EC    |
| TCGCTCAG db/db1 | db/db | 950  | 0.10565  | TRUE  | 0.497512 | FALSE |                         |
| TCGCTCAG db/db1 | db/db | 2053 | 0.084562 | FALSE | 1.262333 | FALSE | Pericyte                |
| TCGCTCAT db/db1 | db/db | 7812 | 0.252153 | TRUE  | 0.804447 | FALSE |                         |
| TCGCTCAT db/db1 | db/db | 1149 | 0.053718 | FALSE | 1.0061   | FALSE | Pericyte                |
| TCGCTCAT db/db1 | db/db | 8755 | 0.022455 | FALSE | 0.298217 | FALSE | Photoreceptor           |
| TCGCTCAT db/db1 | db/db | 718  | 0.078788 | FALSE | 1.353499 | FALSE | Photoreceptor           |
| TCGCTCAT db/db1 | db/db | 562  | 0.013876 | FALSE | 0.94732  | FALSE | Photoreceptor           |
| TCGCTTGA db/db1 | db/db | 1958 | 0.057037 | FALSE | 0.935758 | FALSE | Photoreceptor           |
| TCGCTTGC db/db1 | db/db | 2822 | 0.018088 | FALSE | 0.817916 | FALSE | Photoreceptor           |
| TCGCTTGC db/db1 | db/db | 2497 | 0.016488 | FALSE | 1.100254 | FALSE | Endothelia Venous EC    |
| TCGCTTGT db/db1 | db/db | 2027 | 0.015879 | FALSE | 1.14206  | FALSE | Endothelia Venous EC    |
| TCGCTTGT db/db1 | db/db | 1842 | 0.028251 | FALSE | 0.867691 | FALSE | Endothelia Capillary EC |
| TCGCTTGT db/db1 | db/db | 1756 | 0.036891 | FALSE | 1.598087 | FALSE | Endothelia Capillary EC |
| TCGGATA/ db/db1 | db/db | 1607 | 0.019106 | FALSE | 1.184801 | FALSE | Endothelia EC-C4        |
| TCGGATA( db/db1 | db/db | 3591 | 0.030318 | FALSE | 0.654176 | FALSE | Photoreceptor           |
| TCGGATA( db/db1 | db/db | 514  | 0.049679 | FALSE | 2.471377 | FALSE | Endothelia Capillary EC |
| TCGGATA( db/db1 | db/db | 1484 | 0.017758 | FALSE | 1.098926 | FALSE | Endothelia Venous EC    |
| TCGGATA( db/db1 | db/db | 4016 | 0.043505 | FALSE | 1.040889 | FALSE | Endothelia Venous EC    |
| TCGGATA( db/db1 | db/db | 4063 | 0.014997 | FALSE | 0.603585 | FALSE | Photoreceptor           |
| TCGGATA( db/db1 | db/db | 1543 | 0.013876 | FALSE | 1.106147 | FALSE | Endothelia Capillary EC |
| TCGGATAI db/db1 | db/db | 3816 | 0.060641 | FALSE | 1.24294  | FALSE | Photoreceptor           |



|                 |       |      |          |       |          |       |                        |
|-----------------|-------|------|----------|-------|----------|-------|------------------------|
| TCGGATA/db/db1  | db/db | 1108 | 0.075259 | FALSE | 1.767733 | FALSE | Photoreceptor          |
| TCGGGAC/db/db1  | db/db | 3142 | 0.043505 | FALSE | 1.013806 | FALSE | Endothelia Venous EC   |
| TCGGGAC/db/db1  | db/db | 572  | 0.068864 | FALSE | 1.088841 | FALSE | Photoreceptor          |
| TCGGGAC/db/db1  | db/db | 1461 | 0.037564 | FALSE | 0.949204 | FALSE | Photoreceptor          |
| TCGGGAC/db/db1  | db/db | 805  | 0.016181 | FALSE | 1.522736 | FALSE | Endothelia Capillary E |
| TCGGGAC/db/db1  | db/db | 1596 | 0.022857 | FALSE | 1.376778 | FALSE | Endothelia Aterial EC  |
| TCGGGAC/db/db1  | db/db | 4944 | 0.137569 | TRUE  | 2.437055 | FALSE |                        |
| TCGGGAC/db/db1  | db/db | 598  | 0.114406 | TRUE  | 0.274001 | FALSE |                        |
| TCGGGAC/db/db1  | db/db | 604  | 0.070386 | FALSE | 2.067847 | FALSE | Muller cell            |
| TCGGGAC/db/db1  | db/db | 597  | 0.004762 | FALSE | 2.220962 | FALSE | Pericyte               |
| TCGGGAC/db/db1  | db/db | 6551 | 0.017114 | FALSE | 0.611506 | FALSE | Photoreceptor          |
| TCGGGAC/db/db1  | db/db | 3569 | 0.053718 | FALSE | 1.208584 | FALSE | Endothelia Aterial EC  |
| TCGGGCA/db/db1  | db/db | 2812 | 0.034954 | FALSE | 1.200621 | FALSE | Endothelia Capillary E |
| TCGGGCA/db/db1  | db/db | 2387 | 0.010846 | FALSE | 1.167657 | FALSE | Endothelia Venous EC   |
| TCGGGCA/db/db1  | db/db | 3089 | 0.015879 | FALSE | 0.985726 | FALSE | Endothelia EC-C4       |
| TCGGGCA/db/db1  | db/db | 1929 | 0.019455 | FALSE | 0.962352 | FALSE | Endothelia EC-C4       |
| TCGGGCA/db/db1  | db/db | 672  | 0.039671 | FALSE | 2.128508 | FALSE | Photoreceptor          |
| TCGGGTG/db/db1  | db/db | 3467 | 0.019106 | FALSE | 0.896825 | FALSE | Endothelia Capillary E |
| TCGGGTG/db/db1  | db/db | 2511 | 0.061912 | FALSE | 1.407718 | FALSE | Photoreceptor          |
| TCGGGTG/db/db1  | db/db | 636  | 0.042704 | FALSE | 2.19535  | FALSE | Photoreceptor          |
| TCGGGTG/db/db1  | db/db | 3927 | 0.019455 | FALSE | 0.622031 | FALSE | Photoreceptor          |
| TCGGGTG/db/db1  | db/db | 4628 | 0.025868 | FALSE | 0.771747 | FALSE | Photoreceptor          |
| TCGGGTG/db/db1  | db/db | 1036 | 0.052669 | FALSE | 2.269526 | FALSE | Muller cell            |
| TCGGGTG/db/db1  | db/db | 5745 | 0.027273 | FALSE | 0.755769 | FALSE | Photoreceptor          |
| TCGGGTG/db/db1  | db/db | 3880 | 0.013338 | FALSE | 0.986681 | FALSE | Endothelia Venous EC   |
| TCGGTCTC/db/db1 | db/db | 1408 | 0.012052 | FALSE | 1.31968  | FALSE | Endothelia Capillary E |
| TCGGTCTC/db/db1 | db/db | 6043 | 0.014711 | FALSE | 0.897638 | FALSE | Photoreceptor          |
| TCGGTCTC/db/db1 | db/db | 1906 | 0.044326 | FALSE | 1.213876 | FALSE | Endothelia Capillary E |
| TCGGTCTC/db/db1 | db/db | 626  | 0.046025 | FALSE | 2.745077 | FALSE | Muller cell            |
| TCGGTCTC/db/db1 | db/db | 905  | 0.028754 | FALSE | 1.929581 | FALSE | Endothelia Capillary E |
| TCGGTCTC/db/db1 | db/db | 643  | 0.017114 | FALSE | 2.318788 | FALSE | Endothelia Capillary E |
| TCGGTCTC/db/db1 | db/db | 3205 | 0.026328 | FALSE | 1.091896 | FALSE | Endothelia EC-C4       |
| TCGGTCTC/db/db1 | db/db | 1728 | 0.119568 | TRUE  | 1.109955 | FALSE |                        |
| TCGGTCTC/db/db1 | db/db | 3583 | 0.031411 | FALSE | 1.121542 | FALSE | Endothelia Venous EC   |
| TCGGTCTT/db/db1 | db/db | 1495 | 0.046906 | FALSE | 0.708323 | FALSE | Photoreceptor          |
| TCGGTCTT/db/db1 | db/db | 781  | 0.021669 | FALSE | 0.776662 | FALSE | Photoreceptor          |
| TCGGTCTT/db/db1 | db/db | 2152 | 0.026328 | FALSE | 1.213042 | FALSE | Pericyte               |
| TCGTAGA/db/db1  | db/db | 2225 | 0.016488 | FALSE | 0.970948 | FALSE | Endothelia EC-C4       |
| TCGTAGA/db/db1  | db/db | 1146 | 0.028754 | FALSE | 1.142946 | FALSE | Endothelia Capillary E |
| TCGTAGA/db/db1  | db/db | 4867 | 0.036891 | FALSE | 0.938974 | FALSE | Photoreceptor          |
| TCGTAGAC/db/db1 | db/db | 3578 | 0.028251 | FALSE | 1.005565 | FALSE | Endothelia EC-C4       |
| TCGTAGAC/db/db1 | db/db | 540  | 0.093319 | FALSE | 4.594046 | FALSE | Muller cell            |
| TCGTAGAC/db/db1 | db/db | 1119 | 0.045165 | FALSE | 0.820852 | FALSE | Photoreceptor          |
| TCGTAGAC/db/db1 | db/db | 4653 | 0.031411 | FALSE | 0.807341 | FALSE | Photoreceptor          |
| TCGTAGAC/db/db1 | db/db | 2494 | 0.025868 | FALSE | 1.234944 | FALSE | Endothelia Venous EC   |
| TCGTAGAC/db/db1 | db/db | 1324 | 0.041154 | FALSE | 0.906999 | FALSE | Endothelia Capillary E |
| TCGTAGAC/db/db1 | db/db | 7495 | 0.023266 | FALSE | 0.437666 | FALSE | Photoreceptor          |

|                 |       |      |          |       |          |       |                        |
|-----------------|-------|------|----------|-------|----------|-------|------------------------|
| TCGTAGAC db/db1 | db/db | 1327 | 0.032546 | FALSE | 0.825609 | FALSE | Photoreceptor          |
| TCGTAGAT db/db1 | db/db | 564  | 0.080645 | FALSE | 6.608479 | TRUE  |                        |
| TCGTAGAT db/db1 | db/db | 3416 | 0.109375 | TRUE  | 1.492903 | FALSE |                        |
| TCGTCCAC db/db1 | db/db | 3721 | 0.031411 | FALSE | 0.80288  | FALSE | Photoreceptor          |
| TCGTCCAG db/db1 | db/db | 5453 | 0.028754 | FALSE | 1.012384 | FALSE | Photoreceptor          |
| TCGTCCAG db/db1 | db/db | 1126 | 0.067388 | FALSE | 2.056874 | FALSE | Photoreceptor          |
| TCGTCCAG db/db1 | db/db | 2103 | 0.116912 | TRUE  | 1.535705 | FALSE |                        |
| TCGTCCAT db/db1 | db/db | 2795 | 0.039671 | FALSE | 1.025524 | FALSE | Photoreceptor          |
| TCGTGCTC db/db1 | db/db | 1827 | 0.027758 | FALSE | 1.337196 | FALSE | Endothelia Capillary E |
| TCGTGCTC db/db1 | db/db | 2191 | 0.023682 | FALSE | 1.294489 | FALSE | Endothelia Capillary E |
| TCGTGCTC db/db1 | db/db | 3707 | 0.119124 | TRUE  | 2.283551 | FALSE |                        |
| TCGTGCTT db/db1 | db/db | 3205 | 0.031411 | FALSE | 0.641264 | FALSE | Photoreceptor          |
| TCGTGCTT db/db1 | db/db | 1090 | 0.076994 | FALSE | 0.803103 | FALSE | Photoreceptor          |
| TCGTGCTT db/db1 | db/db | 833  | 0.028754 | FALSE | 3.808794 | FALSE | Muller cell            |
| TCGTGGG db/db1  | db/db | 1491 | 0.011081 | FALSE | 1.094726 | FALSE | Endothelia EC-C4       |
| TCGTGGG db/db1  | db/db | 2056 | 0.070386 | FALSE | 0.976848 | FALSE | Photoreceptor          |
| TCGTGGG db/db1  | db/db | 1958 | 0.038953 | FALSE | 0.867953 | FALSE | Microglia              |
| TCGTGGG db/db1  | db/db | 2522 | 0.084562 | FALSE | 1.145954 | FALSE | Endothelia Venous EC   |
| TCGTGGG db/db1  | db/db | 2006 | 0.044326 | FALSE | 1.355559 | FALSE | Endothelia Venous EC   |
| TCGTGGG db/db1  | db/db | 2610 | 0.041154 | FALSE | 0.899932 | FALSE | Endothelia Venous EC   |
| TCGTGGG db/db1  | db/db | 2117 | 0.018422 | FALSE | 1.256399 | FALSE | Endothelia Aterial EC  |
| TCGTGGG db/db1  | db/db | 1039 | 0.010614 | FALSE | 1.180521 | FALSE | Endothelia Capillary E |
| TCGTGGG db/db1  | db/db | 916  | 0.048732 | FALSE | 1.581444 | FALSE | Muller cell            |
| TCTAACTA db/db1 | db/db | 3073 | 0.024971 | FALSE | 0.746819 | FALSE | Photoreceptor          |
| TCTAACTA db/db1 | db/db | 3310 | 0.137569 | TRUE  | 2.764313 | FALSE |                        |
| TCTAACTC db/db1 | db/db | 6664 | 0.014997 | FALSE | 0.680024 | FALSE | Photoreceptor          |
| TCTAACTC db/db1 | db/db | 658  | 0.007441 | FALSE | 2.11757  | FALSE | Pericyte               |
| TCTAACTC db/db1 | db/db | 1565 | 0.043505 | FALSE | 1.284547 | FALSE | Photoreceptor          |
| TCTAACTC db/db1 | db/db | 2621 | 0.014997 | FALSE | 0.442526 | FALSE | Photoreceptor          |
| TCTAACTG db/db1 | db/db | 1593 | 0.084562 | FALSE | 1.096851 | FALSE | Photoreceptor          |
| TCTAACTT db/db1 | db/db | 660  | 0.011561 | FALSE | 1.717617 | FALSE | Endothelia EC-C4       |
| TCTACATA db/db1 | db/db | 2536 | 0.030859 | FALSE | 1.130056 | FALSE | Endothelia Capillary E |
| TCTACATA db/db1 | db/db | 1682 | 0.485327 | TRUE  | 6.693489 | TRUE  |                        |
| TCTACATA db/db1 | db/db | 1154 | 0.044326 | FALSE | 1.606516 | FALSE | Photoreceptor          |
| TCTACATC db/db1 | db/db | 1640 | 0.065957 | FALSE | 1.48871  | FALSE | Photoreceptor          |
| TCTACATG db/db1 | db/db | 1116 | 0.024105 | FALSE | 1.363716 | FALSE | Endothelia Aterial EC  |
| TCTACCGA db/db1 | db/db | 4879 | 0.055901 | FALSE | 0.973183 | FALSE | Endothelia Venous EC   |
| TCTACCGC db/db1 | db/db | 1266 | 0.01981  | FALSE | 1.767424 | FALSE | Endothelia EC-C4       |
| TCTACCGC db/db1 | db/db | 1658 | 0.035586 | FALSE | 0.739176 | FALSE | Photoreceptor          |
| TCTACCGC db/db1 | db/db | 2005 | 0.027273 | FALSE | 1.177407 | FALSE | Endothelia Capillary E |
| TCTACCGC db/db1 | db/db | 4401 | 0.017758 | FALSE | 0.756756 | FALSE | Photoreceptor          |
| TCTACCGC db/db1 | db/db | 3648 | 0.143501 | TRUE  | 3.569104 | FALSE |                        |
| TCTACCGC db/db1 | db/db | 1130 | 0.01981  | FALSE | 1.236594 | FALSE | Endothelia Capillary E |
| TCTACCGT db/db1 | db/db | 1396 | 0.005958 | FALSE | 1.524382 | FALSE | Pericyte               |
| TCTATACA db/db1 | db/db | 902  | 0.019455 | FALSE | 0.408277 | FALSE | Photoreceptor          |
| TCTATACA db/db1 | db/db | 1734 | 0.021286 | FALSE | 0.852158 | FALSE | Endothelia Capillary E |
| TCTATACC db/db1 | db/db | 1289 | 0.048732 | FALSE | 1.400889 | FALSE | Photoreceptor          |

|                 |       |      |          |       |          |       |                        |
|-----------------|-------|------|----------|-------|----------|-------|------------------------|
| TCTATACG db/db1 | db/db | 8019 | 0.018761 | FALSE | 0.519698 | FALSE | Photoreceptor          |
| TCTATACG db/db1 | db/db | 1165 | 0.029787 | FALSE | 0.974359 | FALSE | Photoreceptor          |
| TCTATACG db/db1 | db/db | 5652 | 0.029787 | FALSE | 0.636313 | FALSE | Photoreceptor          |
| TCTATACG db/db1 | db/db | 779  | 0.060641 | FALSE | 2.178873 | FALSE | Photoreceptor          |
| TCTATACG db/db1 | db/db | 7966 | 0.011561 | FALSE | 0.398248 | FALSE | Photoreceptor          |
| TCTATACT db/db1 | db/db | 3619 | 0.010614 | FALSE | 0.777696 | FALSE | Endothelia Venous EC   |
| TCTATACT db/db1 | db/db | 3640 | 0.046025 | FALSE | 0.864815 | FALSE | Photoreceptor          |
| TCTATACT db/db1 | db/db | 3016 | 0.067388 | FALSE | 0.560793 | FALSE | Photoreceptor          |
| TCTATACT db/db1 | db/db | 4294 | 0.024534 | FALSE | 0.890053 | FALSE | Endothelia Venous EC   |
| TCTATACT db/db1 | db/db | 1840 | 0.029266 | FALSE | 1.585591 | FALSE | Endothelia Capillary E |
| TCTATCAC db/db1 | db/db | 760  | 0.024971 | FALSE | 2.470796 | FALSE | Muller cell            |
| TCTATCAC db/db1 | db/db | 408  | 0.065957 | FALSE | 3.042319 | FALSE | Photoreceptor          |
| TCTATCAC db/db1 | db/db | 7808 | 0.014151 | FALSE | 0.258444 | FALSE | Photoreceptor          |
| TCTATCAC db/db1 | db/db | 767  | 0.048732 | FALSE | 2.161483 | FALSE | Pericyte               |
| TCTATCAC db/db1 | db/db | 2541 | 0.025416 | FALSE | 1.034716 | FALSE | Endothelia Venous EC   |
| TCTATCAG db/db1 | db/db | 3012 | 0.034334 | FALSE | 0.887843 | FALSE | Endothelia Venous EC   |
| TCTCACGA db/db1 | db/db | 2452 | 0.036891 | FALSE | 1.301936 | FALSE | Endothelia Capillary E |
| TCTCACGG db/db1 | db/db | 614  | 0.093319 | FALSE | 0.703163 | FALSE | Photoreceptor          |
| TCTCACGG db/db1 | db/db | 1131 | 0.017434 | FALSE | 1.38832  | FALSE | Endothelia Capillary E |
| TCTCACGT db/db1 | db/db | 2888 | 0.05065  | FALSE | 1.104436 | FALSE | Photoreceptor          |
| TCTCAGCA db/db1 | db/db | 1598 | 0.036232 | FALSE | 1.360637 | FALSE | Photoreceptor          |
| TCTCAGCC db/db1 | db/db | 3289 | 0.018422 | FALSE | 0.863851 | FALSE | Endothelia Capillary E |
| TCTCAGCC db/db1 | db/db | 1524 | 0.135645 | TRUE  | 2.165355 | FALSE |                        |
| TCTCAGCT db/db1 | db/db | 2282 | 0.017114 | FALSE | 1.333867 | FALSE | Endothelia Venous EC   |
| TCTCCGAA db/db1 | db/db | 1317 | 0.013605 | FALSE | 1.245842 | FALSE | Endothelia Capillary E |
| TCTCCGAA db/db1 | db/db | 856  | 0.042704 | FALSE | 2.22535  | FALSE | Photoreceptor          |
| TCTCCGAC db/db1 | db/db | 1330 | 0.012303 | FALSE | 0.739386 | FALSE | Endothelia Capillary E |
| TCTCCGAC db/db1 | db/db | 2729 | 0.023266 | FALSE | 1.093422 | FALSE | Photoreceptor          |
| TCTCCGAT db/db1 | db/db | 425  | 0.01981  | FALSE | 2.946093 | FALSE | Photoreceptor          |
| TCTCCGAT db/db1 | db/db | 4560 | 0.016488 | FALSE | 0.644535 | FALSE | Photoreceptor          |
| TCTCTGGA db/db1 | db/db | 1753 | 0.020171 | FALSE | 0.726151 | FALSE | Endothelia Venous EC   |
| TCTCTGGA db/db1 | db/db | 2609 | 0.028754 | FALSE | 0.871316 | FALSE | Endothelia EC-C4       |
| TCTCTGGC db/db1 | db/db | 1938 | 0.024534 | FALSE | 1.129248 | FALSE | Endothelia Venous EC   |
| TCTCTGGT db/db1 | db/db | 473  | 0.007058 | FALSE | 2.737609 | FALSE | Neuron                 |
| TCTCTGGT db/db1 | db/db | 4382 | 0.012814 | FALSE | 0.678656 | FALSE | Endothelia Capillary E |
| TCTGCCAA db/db1 | db/db | 890  | 0.035586 | FALSE | 0.813917 | FALSE | Photoreceptor          |
| TCTGCCAA db/db1 | db/db | 5913 | 0.01981  | FALSE | 0.539662 | FALSE | Endothelia EC-C4       |
| TCTGCCAA db/db1 | db/db | 2516 | 0.022059 | FALSE | 0.618725 | FALSE | Photoreceptor          |
| TCTGCCAG db/db1 | db/db | 867  | 0.044326 | FALSE | 0.757255 | FALSE | Photoreceptor          |
| TCTGCCAT db/db1 | db/db | 1407 | 0.013338 | FALSE | 1.414092 | FALSE | Endothelia Capillary E |
| TCTGGCTA db/db1 | db/db | 4236 | 0.052669 | FALSE | 0.868949 | FALSE | Photoreceptor          |
| TCTGGCTA db/db1 | db/db | 7811 | 0.53202  | TRUE  | 0.906369 | FALSE |                        |
| TCTGGCTC db/db1 | db/db | 2324 | 0.119124 | TRUE  | 2.642228 | FALSE |                        |
| TCTGGCTC db/db1 | db/db | 824  | 0.016181 | FALSE | 1.956823 | FALSE | Endothelia Capillary E |
| TCTGGCTC db/db1 | db/db | 970  | 0.022059 | FALSE | 2.527338 | FALSE | Pericyte               |
| TCTGGCTC db/db1 | db/db | 1002 | 0.044326 | FALSE | 2.226733 | FALSE | Muller cell            |
| TCTGGCTT db/db1 | db/db | 1867 | 0.108718 | TRUE  | 1.091968 | FALSE |                        |

|                 |       |      |          |       |          |       |                        |
|-----------------|-------|------|----------|-------|----------|-------|------------------------|
| TCTGGCTT db/db1 | db/db | 2071 | 0.007058 | FALSE | 1.2853   | FALSE | Neuron                 |
| TCTGGCTT db/db1 | db/db | 6836 | 0.020908 | FALSE | 0.549924 | FALSE | Photoreceptor          |
| TCTGTCGA db/db1 | db/db | 8662 | 0.035586 | FALSE | 0.582417 | FALSE | Photoreceptor          |
| TCTGTCGC db/db1 | db/db | 3308 | 0.046906 | FALSE | 1.11876  | FALSE | Endothelia Capillary E |
| TCTGTCGC db/db1 | db/db | 1479 | 0.04192  | FALSE | 1.193044 | FALSE | Photoreceptor          |
| TCTTAGTA db/db1 | db/db | 1103 | 0.08663  | FALSE | 2.766947 | FALSE | Muller cell            |
| TCTTAGTA db/db1 | db/db | 1425 | 0.024971 | FALSE | 1.422442 | FALSE | Endothelia Capillary E |
| TCTTAGTA db/db1 | db/db | 551  | 0.036232 | FALSE | 3.474691 | FALSE | Endothelia Capillary E |
| TCTTAGTA db/db1 | db/db | 3410 | 0.020908 | FALSE | 1.00913  | FALSE | Photoreceptor          |
| TCTTAGTA db/db1 | db/db | 3379 | 0.029266 | FALSE | 1.040164 | FALSE | Endothelia Aterial EC  |
| TCTTAGTC db/db1 | db/db | 2248 | 0.021286 | FALSE | 1.054183 | FALSE | Endothelia EC-C4       |
| TCTTAGTC db/db1 | db/db | 1886 | 0.015287 | FALSE | 1.019758 | FALSE | Endothelia Aterial EC  |
| TCTTAGTC db/db1 | db/db | 925  | 0.011805 | FALSE | 0.519062 | FALSE | Photoreceptor          |
| TCTTAGTG db/db1 | db/db | 2419 | 0.026328 | FALSE | 0.576875 | FALSE | Endothelia Venous EC   |
| TCTTAGTT db/db1 | db/db | 4329 | 0.445833 | TRUE  | 3.344825 | FALSE |                        |
| TCTTCCTA db/db1 | db/db | 430  | 0.115723 | TRUE  | 4.663213 | FALSE |                        |
| TCTTCCTA db/db1 | db/db | 4017 | 0.043505 | FALSE | 0.914045 | FALSE | Photoreceptor          |
| TCTTCCTA db/db1 | db/db | 461  | 0.022455 | FALSE | 0.619886 | FALSE | Photoreceptor          |
| TCTTCCTC db/db1 | db/db | 1919 | 0.024534 | FALSE | 1.330181 | FALSE | Pericyte               |
| TCTTCCTC db/db1 | db/db | 1065 | 0.011561 | FALSE | 0.619668 | FALSE | Endothelia Aterial EC  |
| TCTTCCTC db/db1 | db/db | 1655 | 0.029266 | FALSE | 1.599229 | FALSE | Endothelia Capillary E |
| TCTTCCTG db/db1 | db/db | 2699 | 0.024534 | FALSE | 1.050187 | FALSE | Photoreceptor          |
| TCTTCCTG db/db1 | db/db | 833  | 0.064568 | FALSE | 2.111469 | FALSE | Endothelia Capillary E |
| TCTTCCTG db/db1 | db/db | 731  | 0.029787 | FALSE | 2.047383 | FALSE | Endothelia Capillary E |
| TCTTCCTG db/db1 | db/db | 608  | 0.036232 | FALSE | 1.741772 | FALSE | Endothelia Capillary E |
| TCTTCCTG db/db1 | db/db | 2377 | 0.003649 | FALSE | 0.647676 | FALSE | Neuron                 |
| TCTTCCTT db/db1 | db/db | 793  | 0.026328 | FALSE | 1.34887  | FALSE | Photoreceptor          |
| TCTTGCGA db/db1 | db/db | 1679 | 0.018088 | FALSE | 0.946383 | FALSE | Endothelia Aterial EC  |
| TCTTGCGC db/db1 | db/db | 4507 | 0.022455 | FALSE | 0.852248 | FALSE | Endothelia Venous EC   |
| TCTTGCGC db/db1 | db/db | 1581 | 0.098234 | FALSE | 0.560975 | FALSE | Endothelia Capillary E |
| TCTTGCGC db/db1 | db/db | 617  | 0.051646 | FALSE | 2.516295 | FALSE | Photoreceptor          |
| TCTTGCGC db/db1 | db/db | 792  | 0.046025 | FALSE | 1.374588 | FALSE | Photoreceptor          |
| TCTTGCGT db/db1 | db/db | 706  | 0.052669 | FALSE | 1.647515 | FALSE | Photoreceptor          |
| TCTTGCGT db/db1 | db/db | 3518 | 0.009933 | FALSE | 0.952729 | FALSE | Endothelia Venous EC   |
| TCTTGCGT db/db1 | db/db | 5026 | 0.112477 | TRUE  | 2.25603  | FALSE |                        |
| TCTTGCGT db/db1 | db/db | 441  | 0.020908 | FALSE | 1.588787 | FALSE | Neuron                 |
| TCTTTGAA db/db1 | db/db | 1379 | 0.016181 | FALSE | 1.36181  | FALSE | Endothelia EC-C4       |
| TCTTTGAA db/db1 | db/db | 3134 | 0.031973 | FALSE | 0.450219 | FALSE | Photoreceptor          |
| TCTTTGAC db/db1 | db/db | 2543 | 0.016488 | FALSE | 1.09685  | FALSE | Endothelia Capillary E |
| TCTTTGAC db/db1 | db/db | 4131 | 0.059406 | FALSE | 1.115796 | FALSE | Photoreceptor          |
| TCTTTGAG db/db1 | db/db | 373  | 0.021669 | FALSE | 2.763674 | FALSE | Photoreceptor          |
| TCTTTGAG db/db1 | db/db | 3015 | 0.017114 | FALSE | 0.99063  | FALSE | Endothelia Venous EC   |
| TCTTTGAT db/db1 | db/db | 3103 | 0.034334 | FALSE | 1.020605 | FALSE | Photoreceptor          |
| TGAACGT db/db1  | db/db | 348  | 0.029787 | FALSE | 4.705969 | FALSE | Endothelia Capillary E |
| TGAACGT db/db1  | db/db | 7190 | 0.025416 | FALSE | 0.826177 | FALSE | Photoreceptor          |
| TGAACGT db/db1  | db/db | 7054 | 0.073582 | FALSE | 0.593973 | FALSE | Photoreceptor          |
| TGAACGT db/db1  | db/db | 1495 | 0.013338 | FALSE | 1.353436 | FALSE | Endothelia Capillary E |

|                 |       |      |          |       |          |       |                        |
|-----------------|-------|------|----------|-------|----------|-------|------------------------|
| TGAACGTC db/db1 | db/db | 1325 | 0.054795 | FALSE | 0.942198 | FALSE | Muller cell            |
| TGAACGTC db/db1 | db/db | 2302 | 0.101025 | TRUE  | 2.769231 | FALSE |                        |
| TGAACGTT db/db1 | db/db | 1813 | 0.025868 | FALSE | 1.026511 | FALSE | Endothelia Capillary E |
| TGAACGTT db/db1 | db/db | 418  | 0.048732 | FALSE | 8.196721 | TRUE  |                        |
| TGAACGTT db/db1 | db/db | 1405 | 0.015287 | FALSE | 1.125503 | FALSE | Endothelia Capillary E |
| TGAACGTT db/db1 | db/db | 1001 | 0.184701 | TRUE  | 3.17139  | FALSE |                        |
| TGAATCG/ db/db1 | db/db | 634  | 0.026328 | FALSE | 4.376298 | FALSE | Muller cell            |
| TGAATCG/ db/db1 | db/db | 450  | 0.061912 | FALSE | 1.9757   | FALSE | Pericyte               |
| TGAATCGC db/db1 | db/db | 453  | 0.044326 | FALSE | 1.633571 | FALSE | Pericyte               |
| TGAATCGT db/db1 | db/db | 696  | 0.095727 | FALSE | 9.396637 | TRUE  |                        |
| TGAATCGT db/db1 | db/db | 1535 | 0.007058 | FALSE | 1.495263 | FALSE | Endothelia Capillary E |
| TGAATCGT db/db1 | db/db | 939  | 0.044326 | FALSE | 1.486991 | FALSE | Endothelia Venous EC   |
| TGAATCGT db/db1 | db/db | 891  | 0.080645 | FALSE | 1.148329 | FALSE | Photoreceptor          |
| TGAATGC/ db/db1 | db/db | 2248 | 0.013876 | FALSE | 0.206465 | FALSE | Photoreceptor          |
| TGAATGC/ db/db1 | db/db | 5018 | 0.060641 | FALSE | 0.880406 | FALSE | Endothelia Venous EC   |
| TGAATGCC db/db1 | db/db | 1406 | 0.011081 | FALSE | 1.087707 | FALSE | Endothelia Capillary E |
| TGAATGCC db/db1 | db/db | 1037 | 0.048732 | FALSE | 2.259237 | FALSE | Photoreceptor          |
| TGAATGCC db/db1 | db/db | 1386 | 0.078788 | FALSE | 1.359673 | FALSE | Photoreceptor          |
| TGAATGCC db/db1 | db/db | 613  | 0.060641 | FALSE | 3.780476 | FALSE | Muller cell            |
| TGAATGCC db/db1 | db/db | 604  | 0.054795 | FALSE | 2.921491 | FALSE | Neuron                 |
| TGAATGCC db/db1 | db/db | 1442 | 0.024534 | FALSE | 1.805555 | FALSE | Endothelia EC-C4       |
| TGAATGCC db/db1 | db/db | 6567 | 0.035586 | FALSE | 0.491792 | FALSE | Photoreceptor          |
| TGAATGCC db/db1 | db/db | 2105 | 0.106646 | TRUE  | 2.022264 | FALSE |                        |
| TGAATGCT db/db1 | db/db | 505  | 0.019106 | FALSE | 2.069915 | FALSE | Endothelia Capillary E |
| TGAATGCT db/db1 | db/db | 1257 | 0.013876 | FALSE | 1.078672 | FALSE | Endothelia Capillary E |
| TGAATGCT db/db1 | db/db | 3361 | 0.122691 | TRUE  | 2.556669 | FALSE |                        |
| TGACAGTC db/db1 | db/db | 932  | 0.018422 | FALSE | 0.653371 | FALSE | Photoreceptor          |
| TGACAGTC db/db1 | db/db | 875  | 0.067388 | FALSE | 1.650333 | FALSE | Photoreceptor          |
| TGACAGTC db/db1 | db/db | 3248 | 0.031973 | FALSE | 0.952017 | FALSE | Endothelia Venous EC   |
| TGACAGTT db/db1 | db/db | 797  | 0.073582 | FALSE | 0.417306 | FALSE | Photoreceptor          |
| TGACAGTT db/db1 | db/db | 699  | 0.028754 | FALSE | 1.717965 | FALSE | Photoreceptor          |
| TGACCCTA db/db1 | db/db | 2665 | 0.05065  | FALSE | 0.594683 | FALSE | Photoreceptor          |
| TGACCCTA db/db1 | db/db | 1229 | 0.059406 | FALSE | 0.752317 | FALSE | Photoreceptor          |
| TGACCCTC db/db1 | db/db | 3110 | 0.012052 | FALSE | 0.974718 | FALSE | Endothelia Capillary E |
| TGACCCTC db/db1 | db/db | 2706 | 0.016799 | FALSE | 1.021229 | FALSE | Endothelia EC-C4       |
| TGACCCTC db/db1 | db/db | 3333 | 0.015287 | FALSE | 0.406045 | FALSE | Photoreceptor          |
| TGACCCTC db/db1 | db/db | 7426 | 0.022059 | FALSE | 0.262419 | FALSE | Photoreceptor          |
| TGACCCTC db/db1 | db/db | 771  | 0.073582 | FALSE | 2.143358 | FALSE | Endothelia Capillary E |
| TGACCCTT db/db1 | db/db | 7799 | 0.020171 | FALSE | 0.327461 | FALSE | Photoreceptor          |
| TGACCCTT db/db1 | db/db | 7067 | 0.024105 | FALSE | 0.598812 | FALSE | Photoreceptor          |
| TGACGCG/ db/db1 | db/db | 4775 | 0.023682 | FALSE | 0.818011 | FALSE | Photoreceptor          |
| TGACGCG/ db/db1 | db/db | 2930 | 0.357022 | TRUE  | 0.746534 | FALSE |                        |
| TGACGCG/ db/db1 | db/db | 1093 | 0.088776 | FALSE | 2.037476 | FALSE | Photoreceptor          |
| TGACGCG/ db/db1 | db/db | 410  | 0.098234 | FALSE | 7.434944 | TRUE  |                        |
| TGACGCG/ db/db1 | db/db | 888  | 0.109971 | TRUE  | 0.959024 | FALSE |                        |
| TGACGCGC db/db1 | db/db | 597  | 0.018761 | FALSE | 2.344614 | FALSE | Muller cell            |
| TGACGCGC db/db1 | db/db | 668  | 0.656627 | TRUE  | 7.635207 | TRUE  |                        |

|                 |       |      |          |       |          |       |                        |
|-----------------|-------|------|----------|-------|----------|-------|------------------------|
| TGACGCGT db/db1 | db/db | 3137 | 0.035586 | FALSE | 1.021642 | FALSE | Neuron                 |
| TGACGCGT db/db1 | db/db | 5822 | 0.011081 | FALSE | 0.580973 | FALSE | Photoreceptor          |
| TGACTCCA db/db1 | db/db | 460  | 0.091004 | FALSE | 7.446808 | TRUE  |                        |
| TGACTCCA db/db1 | db/db | 3303 | 0.023682 | FALSE | 1.094158 | FALSE | Endothelia EC-C4       |
| TGACTCCA db/db1 | db/db | 2396 | 0.015879 | FALSE | 1.009819 | FALSE | Endothelia Capillary E |
| TGACTCCC db/db1 | db/db | 779  | 0.030318 | FALSE | 2.704008 | FALSE | Neuron                 |
| TGACTCCC db/db1 | db/db | 1003 | 0.007636 | FALSE | 1.114651 | FALSE | Endothelia Capillary E |
| TGACTCCC db/db1 | db/db | 1115 | 0.034954 | FALSE | 0.624387 | FALSE | Photoreceptor          |
| TGACTCCC db/db1 | db/db | 3175 | 0.012814 | FALSE | 0.822855 | FALSE | Endothelia Capillary E |
| TGACTCCC db/db1 | db/db | 959  | 0.052669 | FALSE | 1.538989 | FALSE | Photoreceptor          |
| TGACTCCC db/db1 | db/db | 1337 | 0.025868 | FALSE | 0.845296 | FALSE | Photoreceptor          |
| TGACTCCC db/db1 | db/db | 6538 | 0.164835 | TRUE  | 1.954942 | FALSE |                        |
| TGACTCCT db/db1 | db/db | 2067 | 0.03313  | FALSE | 1.152089 | FALSE | Endothelia EC-C4       |
| TGACTCCT db/db1 | db/db | 490  | 0.061912 | FALSE | 8.664773 | TRUE  |                        |
| TGACTCCT db/db1 | db/db | 9271 | 0.020536 | FALSE | 0.425676 | FALSE | Photoreceptor          |
| TGACTCCT db/db1 | db/db | 2181 | 0.041154 | FALSE | 0.934821 | FALSE | Neuron                 |
| TGAGACT/ db/db1 | db/db | 471  | 0.019106 | FALSE | 0.902639 | FALSE | Muller cell            |
| TGAGACT/ db/db1 | db/db | 4306 | 0.024105 | FALSE | 0.770154 | FALSE | Endothelia EC-C4       |
| TGAGACT( db/db1 | db/db | 8518 | 0.05065  | FALSE | 0.49277  | FALSE | Endothelia Capillary E |
| TGAGACT( db/db1 | db/db | 1540 | 0.012303 | FALSE | 1.080748 | FALSE | Endothelia Venous EC   |
| TGAGACT( db/db1 | db/db | 1057 | 0.016488 | FALSE | 1.214332 | FALSE | Endothelia Capillary E |
| TGAGACTT db/db1 | db/db | 2968 | 0.130259 | TRUE  | 2.786278 | FALSE |                        |
| TGAGACTT db/db1 | db/db | 3419 | 0.020908 | FALSE | 0.685928 | FALSE | Photoreceptor          |
| TGAGACTT db/db1 | db/db | 4008 | 0.061912 | FALSE | 0.876531 | FALSE | Endothelia Capillary E |
| TGAGCAT/ db/db1 | db/db | 2260 | 0.020171 | FALSE | 1.055277 | FALSE | Endothelia EC-C4       |
| TGAGCAT( db/db1 | db/db | 919  | 0.177638 | TRUE  | 5.469756 | TRUE  |                        |
| TGAGCAT( db/db1 | db/db | 3664 | 0.038251 | FALSE | 0.931615 | FALSE | Endothelia Venous EC   |
| TGAGCAT( db/db1 | db/db | 487  | 0.075259 | FALSE | 2.838429 | FALSE | Photoreceptor          |
| TGAGCATT db/db1 | db/db | 3411 | 0.015581 | FALSE | 0.744477 | FALSE | Endothelia EC-C4       |
| TGAGCATT db/db1 | db/db | 2457 | 0.036891 | FALSE | 1.2592   | FALSE | Neuron                 |
| TGAGCGC( db/db1 | db/db | 914  | 0.038251 | FALSE | 2.518833 | FALSE | Neuron                 |
| TGAGCGC( db/db1 | db/db | 2302 | 0.042704 | FALSE | 1.190833 | FALSE | Photoreceptor          |
| TGAGCGC( db/db1 | db/db | 1691 | 0.052669 | FALSE | 1.120255 | FALSE | Photoreceptor          |
| TGAGCGC( db/db1 | db/db | 607  | 0.148377 | TRUE  | 17.09578 | TRUE  |                        |
| TGAGCGC( db/db1 | db/db | 4988 | 0.022857 | FALSE | 0.851902 | FALSE | Photoreceptor          |
| TGAGCGC( db/db1 | db/db | 829  | 0.008644 | FALSE | 1.835317 | FALSE | Pericyte               |
| TGAGCGCT db/db1 | db/db | 1602 | 0.043505 | FALSE | 0.834562 | FALSE | Photoreceptor          |
| TGAGCGCT db/db1 | db/db | 4309 | 0.014429 | FALSE | 0.783106 | FALSE | Endothelia EC-C4       |
| TGAGGAG db/db1  | db/db | 3493 | 0.016181 | FALSE | 0.913463 | FALSE | Endothelia Venous EC   |
| TGAGGAG db/db1  | db/db | 2921 | 0.082569 | FALSE | 0.94639  | FALSE | Endothelia Venous EC   |
| TGAGGAG db/db1  | db/db | 4834 | 0.177638 | TRUE  | 1.709788 | FALSE |                        |
| TGAGGAG db/db1  | db/db | 1931 | 0.058205 | FALSE | 1.031387 | FALSE | Photoreceptor          |
| TGAGGAG db/db1  | db/db | 4154 | 0.037564 | FALSE | 0.799518 | FALSE | Photoreceptor          |
| TGAGGAG db/db1  | db/db | 2480 | 0.073582 | FALSE | 1.296814 | FALSE | Neuron                 |
| TGAGGAG db/db1  | db/db | 3598 | 0.080645 | FALSE | 0.731841 | FALSE | Neuron                 |
| TGAGGAG db/db1  | db/db | 8041 | 0.021669 | FALSE | 0.524764 | FALSE | Photoreceptor          |
| TGAGGAG db/db1  | db/db | 1051 | 0.019455 | FALSE | 2.943679 | FALSE | Muller cell            |

|                 |       |      |          |       |          |       |                        |
|-----------------|-------|------|----------|-------|----------|-------|------------------------|
| TGAGGAG db/db1  | db/db | 421  | 0.106646 | TRUE  | 3.125    | FALSE |                        |
| TGAGGGA db/db1  | db/db | 1467 | 0.034334 | FALSE | 2.871623 | FALSE | Muller cell            |
| TGAGGGA db/db1  | db/db | 519  | 0.032546 | FALSE | 1.990542 | FALSE | Neuron                 |
| TGAGGGA db/db1  | db/db | 1376 | 0.012814 | FALSE | 1.423481 | FALSE | Endothelia Aterial EC  |
| TGAGGGA db/db1  | db/db | 1174 | 0.009933 | FALSE | 0.962968 | FALSE | Endothelia Capillary E |
| TGAGGGA db/db1  | db/db | 709  | 0.088776 | FALSE | 2.980398 | FALSE | Photoreceptor          |
| TGAGGGA db/db1  | db/db | 762  | 0.075259 | FALSE | 1.073336 | FALSE | Photoreceptor          |
| TGAGGGA db/db1  | db/db | 4127 | 0.044326 | FALSE | 0.975817 | FALSE | Photoreceptor          |
| TGAGGTT db/db1  | db/db | 2321 | 0.01981  | FALSE | 1.078539 | FALSE | Endothelia Capillary E |
| TGAGGTT db/db1  | db/db | 401  | 0.013876 | FALSE | 1.385881 | FALSE | Photoreceptor          |
| TGAGGTT db/db1  | db/db | 1966 | 0.10813  | TRUE  | 3.06383  | FALSE |                        |
| TGAGGTT db/db1  | db/db | 3793 | 0.016488 | FALSE | 0.745911 | FALSE | Photoreceptor          |
| TGAGGTT db/db1  | db/db | 392  | 0.035586 | FALSE | 3.443998 | FALSE | Pericyte               |
| TGAGGTT db/db1  | db/db | 6449 | 0.012814 | FALSE | 0.497535 | FALSE | Photoreceptor          |
| TGAGTCA db/db1  | db/db | 6140 | 0.026328 | FALSE | 0.754793 | FALSE | Photoreceptor          |
| TGAGTCA db/db1  | db/db | 1872 | 0.014997 | FALSE | 1.181783 | FALSE | Endothelia Capillary E |
| TGAGTCA db/db1  | db/db | 4602 | 0.019106 | FALSE | 1.041507 | FALSE | Endothelia EC-C4       |
| TGAGTCA db/db1  | db/db | 7940 | 0.012557 | FALSE | 0.5052   | FALSE | Photoreceptor          |
| TGAGTCA db/db1  | db/db | 4096 | 0.035586 | FALSE | 0.914797 | FALSE | Photoreceptor          |
| TGAGTCA db/db1  | db/db | 4786 | 0.023682 | FALSE | 0.393115 | FALSE | Endothelia Venous EC   |
| TGAGTCA db/db1  | db/db | 1066 | 0.03313  | FALSE | 1.764959 | FALSE | Photoreceptor          |
| TGAGTCA db/db1  | db/db | 614  | 0.031973 | FALSE | 2.204219 | FALSE | Endothelia Capillary E |
| TGATCAG db/db1  | db/db | 371  | 0.102807 | TRUE  | 0.852498 | FALSE |                        |
| TGATCAG db/db1  | db/db | 2196 | 0.048732 | FALSE | 1.693541 | FALSE | Neuron                 |
| TGATCAG db/db1  | db/db | 4962 | 0.018088 | FALSE | 0.797718 | FALSE | Endothelia EC-C4       |
| TGATCAG db/db1  | db/db | 3796 | 0.031973 | FALSE | 0.706823 | FALSE | Photoreceptor          |
| TGATCAG db/db1  | db/db | 3329 | 0.009933 | FALSE | 0.997794 | FALSE | Endothelia Venous EC   |
| TGATCAG db/db1  | db/db | 694  | 0.040404 | FALSE | 2.21543  | FALSE | Photoreceptor          |
| TGATCAG db/db1  | db/db | 613  | 0.082569 | FALSE | 2.202976 | FALSE | Muller cell            |
| TGATCAG db/db1  | db/db | 1976 | 0.039671 | FALSE | 0.89229  | FALSE | Photoreceptor          |
| TGATCAG db/db1  | db/db | 785  | 0.059406 | FALSE | 2.127524 | FALSE | Endothelia Capillary E |
| TGATCTTA db/db1 | db/db | 694  | 0.059406 | FALSE | 0.970576 | FALSE | Photoreceptor          |
| TGATCTTC db/db1 | db/db | 1197 | 0.005958 | FALSE | 0.967356 | FALSE | Endothelia Capillary E |
| TGATCTTC db/db1 | db/db | 1859 | 0.038251 | FALSE | 0.710528 | FALSE | Photoreceptor          |
| TGATCTTC db/db1 | db/db | 407  | 0.013074 | FALSE | 2.123841 | FALSE | Endothelia Capillary E |
| TGATCTTG db/db1 | db/db | 2167 | 0.030318 | FALSE | 1.312034 | FALSE | Photoreceptor          |
| TGATCTTG db/db1 | db/db | 1671 | 0.146004 | TRUE  | 3.622159 | FALSE |                        |
| TGATCTTG db/db1 | db/db | 364  | 0.088776 | FALSE | 17.06827 | TRUE  |                        |
| TGATCTTG db/db1 | db/db | 3736 | 0.118221 | TRUE  | 2.643726 | FALSE |                        |
| TGATCTTT db/db1 | db/db | 1708 | 0.043505 | FALSE | 1.32348  | FALSE | Endothelia Capillary E |
| TGATCTTT db/db1 | db/db | 1406 | 0.021669 | FALSE | 1.377199 | FALSE | Endothelia Capillary E |
| TGATGCA db/db1  | db/db | 2202 | 0.038251 | FALSE | 0.778449 | FALSE | Photoreceptor          |
| TGATGCA db/db1  | db/db | 1033 | 0.098234 | FALSE | 0.794096 | FALSE | Photoreceptor          |
| TGATGCA db/db1  | db/db | 5994 | 0.04192  | FALSE | 0.784894 | FALSE | Photoreceptor          |
| TGATGCA db/db1  | db/db | 4944 | 0.067388 | FALSE | 0.774873 | FALSE | Neuron                 |
| TGATGCA db/db1  | db/db | 2149 | 0.033726 | FALSE | 1.012767 | FALSE | Endothelia Venous EC   |
| TGATGCA db/db1  | db/db | 1448 | 0.084562 | FALSE | 7.961538 | TRUE  |                        |

|          |        |       |      |          |       |          |       |                        |
|----------|--------|-------|------|----------|-------|----------|-------|------------------------|
| TGATGCAC | db/db1 | db/db | 3168 | 0.017434 | FALSE | 1.292992 | FALSE | Photoreceptor          |
| TGATGCAT | db/db1 | db/db | 1250 | 0.020171 | FALSE | 1.767512 | FALSE | Endothelia Capillary E |
| TGATGCAT | db/db1 | db/db | 1254 | 0.051646 | FALSE | 0.809519 | FALSE | Photoreceptor          |
| TGATGCAT | db/db1 | db/db | 757  | 0.026328 | FALSE | 1.156779 | FALSE | Neuron                 |
| TGATGCAT | db/db1 | db/db | 1673 | 0.010157 | FALSE | 0.559192 | FALSE | Photoreceptor          |
| TGATGGT  | db/db1 | db/db | 492  | 0.095727 | FALSE | 3.183306 | FALSE | Photoreceptor          |
| TGATGGT  | db/db1 | db/db | 3009 | 0.033726 | FALSE | 1.113414 | FALSE | Photoreceptor          |
| TGATGGT  | db/db1 | db/db | 774  | 0.008852 | FALSE | 2.046761 | FALSE | Endothelia Capillary E |
| TGATGGT  | db/db1 | db/db | 4926 | 0.04192  | FALSE | 0.765746 | FALSE | Endothelia Venous EC   |
| TGATGGT  | db/db1 | db/db | 1478 | 0.088776 | FALSE | 1.336813 | FALSE | Photoreceptor          |
| TGATGGT  | db/db1 | db/db | 785  | 0.026796 | FALSE | 0.776795 | FALSE | Photoreceptor          |
| TGATTCTA | db/db1 | db/db | 921  | 0.018088 | FALSE | 1.701866 | FALSE | Endothelia Capillary E |
| TGATTCTA | db/db1 | db/db | 411  | 0.022455 | FALSE | 0.797009 | FALSE | Pericyte               |
| TGATTCTA | db/db1 | db/db | 3044 | 0.008852 | FALSE | 1.329764 | FALSE | Photoreceptor          |
| TGATTCTA | db/db1 | db/db | 1499 | 0.032546 | FALSE | 1.554378 | FALSE | Endothelia Capillary E |
| TGATTCTA | db/db1 | db/db | 3050 | 0.027273 | FALSE | 0.939648 | FALSE | Endothelia Aterial EC  |
| TGATTCTC | db/db1 | db/db | 3595 | 0.019106 | FALSE | 0.770321 | FALSE | Photoreceptor          |
| TGATTCTC | db/db1 | db/db | 629  | 0.025416 | FALSE | 2.41064  | FALSE | Photoreceptor          |
| TGATTCTC | db/db1 | db/db | 7393 | 0.016488 | FALSE | 0.527521 | FALSE | Photoreceptor          |
| TGATTCTT | db/db1 | db/db | 3691 | 0.019106 | FALSE | 0.989958 | FALSE | Endothelia Capillary E |
| TGATTCTT | db/db1 | db/db | 1520 | 0.009712 | FALSE | 1.16585  | FALSE | Endothelia Capillary E |
| TGATTTCa | db/db1 | db/db | 1960 | 0.023682 | FALSE | 1.029091 | FALSE | Photoreceptor          |
| TGATTTCa | db/db1 | db/db | 2265 | 0.040404 | FALSE | 1.128856 | FALSE | Photoreceptor          |
| TGATTTCc | db/db1 | db/db | 3478 | 0.025868 | FALSE | 0.872818 | FALSE | Endothelia Capillary E |
| TGATTTCc | db/db1 | db/db | 439  | 0.05065  | FALSE | 3.327125 | FALSE | Muller cell            |
| TGATTTCG | db/db1 | db/db | 2779 | 0.040404 | FALSE | 1.005684 | FALSE | Endothelia Capillary E |
| TGATTTCG | db/db1 | db/db | 2550 | 0.020171 | FALSE | 1.21508  | FALSE | Endothelia Aterial EC  |
| TGATTTCG | db/db1 | db/db | 1225 | 0.068864 | FALSE | 1.457828 | FALSE | Pericyte               |
| TGATTTCT | db/db1 | db/db | 1867 | 0.013074 | FALSE | 1.222316 | FALSE | Pericyte               |
| TGATTTCT | db/db1 | db/db | 2073 | 0.017434 | FALSE | 1.097059 | FALSE | Endothelia Capillary E |
| TGATTTCT | db/db1 | db/db | 523  | 0.039671 | FALSE | 38.6059  | TRUE  |                        |
| TGCACGG  | db/db1 | db/db | 3186 | 0.011561 | FALSE | 0.899412 | FALSE | Endothelia Venous EC   |
| TGCACGG  | db/db1 | db/db | 1223 | 0.013074 | FALSE | 1.564269 | FALSE | Endothelia Capillary E |
| TGCACGG  | db/db1 | db/db | 792  | 0.013605 | FALSE | 1.625789 | FALSE | Photoreceptor          |
| TGCACGG  | db/db1 | db/db | 959  | 0.058205 | FALSE | 1.724458 | FALSE | Photoreceptor          |
| TGCACGG  | db/db1 | db/db | 709  | 0.045165 | FALSE | 2.652137 | FALSE | Muller cell            |
| TGCACGG  | db/db1 | db/db | 3293 | 0.100845 | TRUE  | 2.025605 | FALSE |                        |
| TGCACGG  | db/db1 | db/db | 655  | 0.031411 | FALSE | 1.465095 | FALSE | Photoreceptor          |
| TGCACGG  | db/db1 | db/db | 679  | 0.028251 | FALSE | 0.467712 | FALSE | Neuron                 |
| TGCACGG  | db/db1 | db/db | 1015 | 0.120957 | TRUE  | 3.918023 | FALSE |                        |
| TGCACGG  | db/db1 | db/db | 8297 | 0.015879 | FALSE | 0.614286 | FALSE | Photoreceptor          |
| TGCACGG  | db/db1 | db/db | 1204 | 0.021286 | FALSE | 0.994471 | FALSE | Endothelia Capillary E |
| TGCACGG  | db/db1 | db/db | 684  | 0.05065  | FALSE | 2.219775 | FALSE | Endothelia Capillary E |
| TGCACGG  | db/db1 | db/db | 1271 | 0.016799 | FALSE | 1.211993 | FALSE | Endothelia EC-C4       |
| TGCACGG  | db/db1 | db/db | 5615 | 0.445833 | TRUE  | 1.49952  | FALSE |                        |
| TGCACGG  | db/db1 | db/db | 5286 | 0.024105 | FALSE | 0.7439   | FALSE | Photoreceptor          |
| TGCACGG  | db/db1 | db/db | 918  | 0.007058 | FALSE | 2.204833 | FALSE | Photoreceptor          |



|          |        |       |      |          |       |          |       |                        |
|----------|--------|-------|------|----------|-------|----------|-------|------------------------|
| TGCACGG  | db/db1 | db/db | 574  | 0.065957 | FALSE | 5.183312 | TRUE  |                        |
| TGCAGAT  | db/db1 | db/db | 1877 | 0.011561 | FALSE | 1.31348  | FALSE | Endothelia EC-C4       |
| TGCAGAT  | db/db1 | db/db | 2395 | 0.024534 | FALSE | 1.2443   | FALSE | Endothelia Venous EC   |
| TGCAGAT  | db/db1 | db/db | 404  | 0.024971 | FALSE | 5.617978 | TRUE  |                        |
| TGCAGAT  | db/db1 | db/db | 1786 | 0.020908 | FALSE | 1.235861 | FALSE | Endothelia Capillary E |
| TGCAGAT  | db/db1 | db/db | 8840 | 0.034954 | FALSE | 0.248062 | FALSE | Photoreceptor          |
| TGCAGAT  | db/db1 | db/db | 871  | 0.046025 | FALSE | 1.383053 | FALSE | Photoreceptor          |
| TGCAGAT  | db/db1 | db/db | 418  | 0.091004 | FALSE | 2.239369 | FALSE | Photoreceptor          |
| TGCAGGC  | db/db1 | db/db | 3117 | 0.022455 | FALSE | 0.526619 | FALSE | Photoreceptor          |
| TGCAGGC  | db/db1 | db/db | 1320 | 0.060641 | FALSE | 1.434054 | FALSE | Photoreceptor          |
| TGCAGGC  | db/db1 | db/db | 8089 | 0.015287 | FALSE | 0.687271 | FALSE | Photoreceptor          |
| TGCAGGC  | db/db1 | db/db | 436  | 0.184701 | TRUE  | 9.466437 | TRUE  |                        |
| TGCAGGC  | db/db1 | db/db | 408  | 0.091004 | FALSE | 2.27903  | FALSE | Endothelia Capillary E |
| TGCAGGC  | db/db1 | db/db | 409  | 0.036232 | FALSE | 0.80572  | FALSE | Photoreceptor          |
| TGCAGGC  | db/db1 | db/db | 1856 | 0.007249 | FALSE | 1.233419 | FALSE | Endothelia Capillary E |
| TGCAGGC  | db/db1 | db/db | 2495 | 0.027758 | FALSE | 1.292058 | FALSE | Endothelia Venous EC   |
| TGCAGTA  | db/db1 | db/db | 2777 | 0.030318 | FALSE | 0.666859 | FALSE | Photoreceptor          |
| TGCAGTA  | db/db1 | db/db | 405  | 0.006499 | FALSE | 2.724505 | FALSE | Muller cell            |
| TGCAGTA  | db/db1 | db/db | 3724 | 0.018088 | FALSE | 0.843604 | FALSE | Endothelia Capillary E |
| TGCAGTA  | db/db1 | db/db | 4655 | 0.040404 | FALSE | 0.878613 | FALSE | Photoreceptor          |
| TGCAGTA  | db/db1 | db/db | 824  | 0.068864 | FALSE | 3.136438 | FALSE | Photoreceptor          |
| TGCATCCC | db/db1 | db/db | 3938 | 0.014997 | FALSE | 0.957467 | FALSE | Endothelia Venous EC   |
| TGCATCCC | db/db1 | db/db | 3619 | 0.016488 | FALSE | 0.823366 | FALSE | Photoreceptor          |
| TGCATCCC | db/db1 | db/db | 2387 | 0.021286 | FALSE | 0.729145 | FALSE | Photoreceptor          |
| TGCATCCC | db/db1 | db/db | 3456 | 0.020171 | FALSE | 0.630117 | FALSE | Photoreceptor          |
| TGCATCCC | db/db1 | db/db | 886  | 0.138889 | TRUE  | 10.58575 | TRUE  |                        |
| TGCATCCT | db/db1 | db/db | 2483 | 0.029266 | FALSE | 1.237218 | FALSE | Photoreceptor          |
| TGCATCCT | db/db1 | db/db | 1315 | 0.068864 | FALSE | 0.903166 | FALSE | Photoreceptor          |
| TGCATCCT | db/db1 | db/db | 3362 | 0.023682 | FALSE | 0.628405 | FALSE | Photoreceptor          |
| TGCATCCT | db/db1 | db/db | 437  | 0.026328 | FALSE | 2.406819 | FALSE | Neuron                 |
| TGCATGA  | db/db1 | db/db | 1585 | 0.095727 | FALSE | 0.81617  | FALSE | Photoreceptor          |
| TGCATGA  | db/db1 | db/db | 1245 | 0.070386 | FALSE | 1.301284 | FALSE | Photoreceptor          |
| TGCATGA  | db/db1 | db/db | 2045 | 0.146004 | TRUE  | 3.455842 | FALSE |                        |
| TGCATGA  | db/db1 | db/db | 3969 | 0.025868 | FALSE | 0.972134 | FALSE | Endothelia Venous EC   |
| TGCATGA  | db/db1 | db/db | 4248 | 0.100845 | TRUE  | 2.87506  | FALSE |                        |
| TGCATGA  | db/db1 | db/db | 1399 | 0.031973 | FALSE | 1.680427 | FALSE | Pericyte               |
| TGCATGA  | db/db1 | db/db | 1748 | 0.009933 | FALSE | 1.282825 | FALSE | Endothelia Capillary E |
| TGCATGA  | db/db1 | db/db | 796  | 0.063221 | FALSE | 2.433301 | FALSE | Muller cell            |
| TGCCGAG  | db/db1 | db/db | 3197 | 0.034334 | FALSE | 0.97983  | FALSE | Endothelia EC-C4       |
| TGCCGAG  | db/db1 | db/db | 2440 | 0.025416 | FALSE | 1.14458  | FALSE | Neuron                 |
| TGCCGAG  | db/db1 | db/db | 8066 | 0.027758 | FALSE | 0.453121 | FALSE | Photoreceptor          |
| TGCCGAG  | db/db1 | db/db | 780  | 0.106408 | TRUE  | 9.657595 | TRUE  |                        |
| TGCGACG  | db/db1 | db/db | 640  | 0.109375 | TRUE  | 4.835165 | FALSE |                        |
| TGCGACG  | db/db1 | db/db | 7477 | 0.061912 | FALSE | 0.782788 | FALSE | Photoreceptor          |
| TGCGACG  | db/db1 | db/db | 849  | 0.016181 | FALSE | 2.012788 | FALSE | Endothelia Capillary E |
| TGCGACG  | db/db1 | db/db | 7624 | 0.014711 | FALSE | 0.305493 | FALSE | Photoreceptor          |
| TGCGACG  | db/db1 | db/db | 1372 | 0.091004 | FALSE | 1.24493  | FALSE | Photoreceptor          |

|                 |       |      |          |       |          |       |                        |
|-----------------|-------|------|----------|-------|----------|-------|------------------------|
| TGCGACG(db/db1  | db/db | 1315 | 0.017114 | FALSE | 0.618817 | FALSE | Photoreceptor          |
| TGCGACG(db/db1  | db/db | 380  | 0.098234 | FALSE | 3.613979 | FALSE | Photoreceptor          |
| TGCGACG(db/db1  | db/db | 3132 | 0.060641 | FALSE | 1.317187 | FALSE | Photoreceptor          |
| TGCGACG db/db1  | db/db | 628  | 0.022059 | FALSE | 2.683348 | FALSE | Neuron                 |
| TGCGACG db/db1  | db/db | 828  | 0.047807 | FALSE | 1.996397 | FALSE | Photoreceptor          |
| TGCGACG db/db1  | db/db | 2511 | 0.088776 | FALSE | 6.274921 | TRUE  |                        |
| TGCGACG db/db1  | db/db | 1969 | 0.010614 | FALSE | 1.016777 | FALSE | Endothelia Capillary E |
| TGCGATA db/db1  | db/db | 1382 | 0.020171 | FALSE | 1.22676  | FALSE | Endothelia Capillary E |
| TGCGATA db/db1  | db/db | 406  | 0.252153 | TRUE  | 9.874327 | TRUE  |                        |
| TGCGATA db/db1  | db/db | 4427 | 0.095727 | FALSE | 0.626184 | FALSE | Photoreceptor          |
| TGCGATA db/db1  | db/db | 2277 | 0.013074 | FALSE | 1.446486 | FALSE | Photoreceptor          |
| TGCGATA db/db1  | db/db | 1023 | 0.046025 | FALSE | 1.334934 | FALSE | Photoreceptor          |
| TGCGGCA db/db1  | db/db | 596  | 0.025416 | FALSE | 2.19098  | FALSE | Neuron                 |
| TGCGGCA db/db1  | db/db | 4457 | 0.058205 | FALSE | 0.996303 | FALSE | Photoreceptor          |
| TGCGGCA db/db1  | db/db | 1494 | 0.024971 | FALSE | 1.912694 | FALSE | Endothelia EC-C4       |
| TGCGGCA db/db1  | db/db | 416  | 0.095727 | FALSE | 3.003274 | FALSE | Endothelia Capillary E |
| TGCGGCA db/db1  | db/db | 719  | 0.034954 | FALSE | 1.558444 | FALSE | Photoreceptor          |
| TGCGGCA db/db1  | db/db | 613  | 0.020536 | FALSE | 3.238166 | FALSE | Muller cell            |
| TGCGGCA db/db1  | db/db | 501  | 0.04192  | FALSE | 1.190402 | FALSE | Photoreceptor          |
| TGCGGGT db/db1  | db/db | 3559 | 0.025868 | FALSE | 0.934652 | FALSE | Endothelia Venous EC   |
| TGCGGGT db/db1  | db/db | 8541 | 0.037564 | FALSE | 0.54399  | FALSE | Photoreceptor          |
| TGCGGGT db/db1  | db/db | 2472 | 0.004598 | FALSE | 0.985498 | FALSE | Neuron                 |
| TGCGGGT db/db1  | db/db | 1612 | 0.082569 | FALSE | 1.585415 | FALSE | Endothelia Capillary E |
| TGCGGGT db/db1  | db/db | 6061 | 0.018088 | FALSE | 0.670885 | FALSE | Photoreceptor          |
| TGCGGGT db/db1  | db/db | 3401 | 0.411992 | TRUE  | 3.616995 | FALSE |                        |
| TGCGGGT db/db1  | db/db | 1357 | 0.031411 | FALSE | 1.833    | FALSE | Endothelia Capillary E |
| TGCGGGT db/db1  | db/db | 3082 | 0.024971 | FALSE | 0.955188 | FALSE | Endothelia Capillary E |
| TGCGGGT db/db1  | db/db | 669  | 0.012814 | FALSE | 1.190053 | FALSE | Photoreceptor          |
| TGCGGGT db/db1  | db/db | 2048 | 0.025416 | FALSE | 0.915362 | FALSE | Photoreceptor          |
| TGCGGGT db/db1  | db/db | 2786 | 0.016799 | FALSE | 1.358719 | FALSE | Photoreceptor          |
| TGCTCCAA db/db1 | db/db | 2393 | 0.054795 | FALSE | 0.778609 | FALSE | Photoreceptor          |
| TGCTCCAA db/db1 | db/db | 1021 | 0.014997 | FALSE | 1.108802 | FALSE | Photoreceptor          |
| TGCTCCAC db/db1 | db/db | 1955 | 0.011805 | FALSE | 0.988836 | FALSE | Endothelia Capillary E |
| TGCTCCAC db/db1 | db/db | 786  | 0.040404 | FALSE | 0.739265 | FALSE | Photoreceptor          |
| TGCTCCAG db/db1 | db/db | 8687 | 0.063221 | FALSE | 0.282632 | FALSE | Photoreceptor          |
| TGCTCCAG db/db1 | db/db | 1560 | 0.044326 | FALSE | 1.441891 | FALSE | Photoreceptor          |
| TGCTCCAG db/db1 | db/db | 1135 | 0.054795 | FALSE | 1.715231 | FALSE | Endothelia Capillary E |
| TGCTCGTC db/db1 | db/db | 464  | 0.103567 | TRUE  | 4.32     | FALSE |                        |
| TGCTCGTC db/db1 | db/db | 1333 | 0.071958 | FALSE | 5.749056 | TRUE  |                        |
| TGCTCGTC db/db1 | db/db | 691  | 0.030318 | FALSE | 2.580193 | FALSE | Muller cell            |
| TGCTCGTT db/db1 | db/db | 899  | 0.076994 | FALSE | 1.353911 | FALSE | Photoreceptor          |
| TGCTGAA db/db1  | db/db | 3490 | 0.067388 | FALSE | 1.066827 | FALSE | Photoreceptor          |
| TGCTGAA db/db1  | db/db | 3789 | 0.022857 | FALSE | 0.826831 | FALSE | Endothelia EC-C4       |
| TGCTGAA db/db1  | db/db | 2172 | 0.032546 | FALSE | 0.630769 | FALSE | Photoreceptor          |
| TGCTGAA db/db1  | db/db | 3367 | 0.020908 | FALSE | 0.753794 | FALSE | Photoreceptor          |
| TGCTTCGA db/db1 | db/db | 2386 | 0.027758 | FALSE | 0.321662 | FALSE | Photoreceptor          |
| TGCTTCGA db/db1 | db/db | 2749 | 0.103732 | TRUE  | 1.147561 | FALSE |                        |

|                 |       |      |          |       |          |       |                        |
|-----------------|-------|------|----------|-------|----------|-------|------------------------|
| TGCTTCGC db/db1 | db/db | 2883 | 0.15354  | TRUE  | 2.581875 | FALSE |                        |
| TGCTTCGC db/db1 | db/db | 1540 | 0.017114 | FALSE | 1.460992 | FALSE | Endothelia EC-C4       |
| TGCTTCGT db/db1 | db/db | 2989 | 0.030318 | FALSE | 1.207856 | FALSE | Endothelia Venous EC   |
| TGCTTCGT db/db1 | db/db | 1639 | 0.100845 | TRUE  | 2.024584 | FALSE |                        |
| TGCTTGCA db/db1 | db/db | 2507 | 0.060641 | FALSE | 0.733035 | FALSE | Photoreceptor          |
| TGCTTGCA db/db1 | db/db | 2081 | 0.143501 | TRUE  | 8.712872 | TRUE  |                        |
| TGCTTGCC db/db1 | db/db | 1232 | 0.053718 | FALSE | 1.635873 | FALSE | Endothelia Capillary E |
| TGCTTGCC db/db1 | db/db | 562  | 0.164835 | TRUE  | 10.03628 | TRUE  |                        |
| TGCTTGCC db/db1 | db/db | 2945 | 0.033726 | FALSE | 0.750286 | FALSE | Photoreceptor          |
| TGCTTGCT db/db1 | db/db | 543  | 0.017758 | FALSE | 1.511716 | FALSE | Photoreceptor          |
| TGGAACF db/db1  | db/db | 844  | 0.022059 | FALSE | 1.659961 | FALSE | Endothelia Capillary E |
| TGGAACF db/db1  | db/db | 4591 | 0.022857 | FALSE | 0.997697 | FALSE | Endothelia Venous EC   |
| TGGAACF db/db1  | db/db | 683  | 0.137569 | TRUE  | 1.135074 | FALSE |                        |
| TGGAACF db/db1  | db/db | 1690 | 0.038953 | FALSE | 1.026932 | FALSE | Photoreceptor          |
| TGGAACF db/db1  | db/db | 406  | 0.029787 | FALSE | 2.355636 | FALSE | Photoreceptor          |
| TGGAACF db/db1  | db/db | 1373 | 0.020536 | FALSE | 0.800313 | FALSE | Neuron                 |
| TGGAACF db/db1  | db/db | 2932 | 0.019455 | FALSE | 0.745697 | FALSE | Photoreceptor          |
| TGGAGAG db/db1  | db/db | 3054 | 0.030318 | FALSE | 1.004742 | FALSE | Endothelia Capillary E |
| TGGAGAG db/db1  | db/db | 1402 | 0.091004 | FALSE | 1.944624 | FALSE | Photoreceptor          |
| TGGAGAG db/db1  | db/db | 1285 | 0.078788 | FALSE | 2.025408 | FALSE | Muller cell            |
| TGGAGGA db/db1  | db/db | 1306 | 0.033726 | FALSE | 1.20202  | FALSE | Endothelia Capillary E |
| TGGAGGA db/db1  | db/db | 1137 | 0.070386 | FALSE | 0.89631  | FALSE | Photoreceptor          |
| TGGAGGA db/db1  | db/db | 1837 | 0.112477 | TRUE  | 3.77709  | FALSE |                        |
| TGGAGGA db/db1  | db/db | 1566 | 0.016488 | FALSE | 1.237222 | FALSE | Endothelia Capillary E |
| TGGAGGA db/db1  | db/db | 1172 | 0.039671 | FALSE | 1.194909 | FALSE | Photoreceptor          |
| TGGAGGA db/db1  | db/db | 2713 | 0.030859 | FALSE | 0.801696 | FALSE | Photoreceptor          |
| TGGAGGA db/db1  | db/db | 3297 | 0.010846 | FALSE | 0.861179 | FALSE | Endothelia EC-C4       |
| TGGATCAF db/db1 | db/db | 1232 | 0.020536 | FALSE | 0.995228 | FALSE | Photoreceptor          |
| TGGATCAF db/db1 | db/db | 2185 | 0.015581 | FALSE | 1.081541 | FALSE | Endothelia Capillary E |
| TGGATCAF db/db1 | db/db | 9368 | 0.012814 | FALSE | 0.463662 | FALSE | Photoreceptor          |
| TGGATCAF db/db1 | db/db | 2833 | 0.05065  | FALSE | 1.405098 | FALSE | Photoreceptor          |
| TGGATCAF db/db1 | db/db | 3658 | 0.03313  | FALSE | 1.034531 | FALSE | Photoreceptor          |
| TGGATCAF db/db1 | db/db | 991  | 0.046906 | FALSE | 1.607979 | FALSE | Photoreceptor          |
| TGGATCAF db/db1 | db/db | 2845 | 0.034954 | FALSE | 1.054928 | FALSE | Endothelia Capillary E |
| TGGATCAF db/db1 | db/db | 6087 | 0.028754 | FALSE | 0.478561 | FALSE | Photoreceptor          |
| TGGATCAF db/db1 | db/db | 335  | 0.103567 | TRUE  | 31.66667 | TRUE  |                        |
| TGGATCAI db/db1 | db/db | 586  | 0.063221 | FALSE | 2.514401 | FALSE | Microglia              |
| TGGATCAI db/db1 | db/db | 2433 | 0.023682 | FALSE | 0.734389 | FALSE | Photoreceptor          |
| TGGATGTf db/db1 | db/db | 578  | 0.028251 | FALSE | 2.398627 | FALSE | Muller cell            |
| TGGATGTf db/db1 | db/db | 1069 | 0.14163  | TRUE  | 4.211151 | FALSE |                        |
| TGGATGTf db/db1 | db/db | 1599 | 0.022857 | FALSE | 1.511095 | FALSE | Endothelia Capillary E |
| TGGATGTf db/db1 | db/db | 729  | 0.08663  | FALSE | 1.393399 | FALSE | Photoreceptor          |
| TGGATGTf db/db1 | db/db | 3329 | 0.042704 | FALSE | 0.961812 | FALSE | Photoreceptor          |
| TGGATGTf db/db1 | db/db | 8012 | 0.020171 | FALSE | 0.625068 | FALSE | Photoreceptor          |
| TGGATGTf db/db1 | db/db | 5627 | 0.039671 | FALSE | 0.97393  | FALSE | Photoreceptor          |
| TGGATGTI db/db1 | db/db | 619  | 0.018088 | FALSE | 0.59108  | FALSE | Photoreceptor          |
| TGGATGTI db/db1 | db/db | 963  | 0.058205 | FALSE | 1.344624 | FALSE | Neuron                 |

|                |       |      |          |       |          |       |                        |
|----------------|-------|------|----------|-------|----------|-------|------------------------|
| TGGATGT/db/db1 | db/db | 2450 | 0.075259 | FALSE | 1.315691 | FALSE | Photoreceptor          |
| TGGCGTG/db/db1 | db/db | 1083 | 0.042704 | FALSE | 0.773014 | FALSE | Photoreceptor          |
| TGGCGTG/db/db1 | db/db | 945  | 0.041154 | FALSE | 2.205492 | FALSE | Photoreceptor          |
| TGGCGTG/db/db1 | db/db | 609  | 0.024534 | FALSE | 3.420163 | FALSE | Photoreceptor          |
| TGGCGTG/db/db1 | db/db | 4099 | 0.020171 | FALSE | 0.892714 | FALSE | Endothelia EC-C4       |
| TGGCGTG/db/db1 | db/db | 1035 | 0.046025 | FALSE | 1.978564 | FALSE | Photoreceptor          |
| TGGCGTG/db/db1 | db/db | 2123 | 0.036232 | FALSE | 0.786176 | FALSE | Muller cell            |
| TGGCGTG/db/db1 | db/db | 2461 | 0.039671 | FALSE | 1.119336 | FALSE | Photoreceptor          |
| TGGCGTG/db/db1 | db/db | 855  | 0.058205 | FALSE | 1.333506 | FALSE | Photoreceptor          |
| TGGGAAG/db/db1 | db/db | 3267 | 0.010846 | FALSE | 0.808529 | FALSE | Endothelia EC-C4       |
| TGGGAAG/db/db1 | db/db | 944  | 0.109375 | TRUE  | 5.670103 | TRUE  |                        |
| TGGGAAG/db/db1 | db/db | 1282 | 0.05065  | FALSE | 1.993978 | FALSE | Photoreceptor          |
| TGGGAAG/db/db1 | db/db | 2036 | 0.031411 | FALSE | 1.225484 | FALSE | Endothelia Capillary E |
| TGGGAAG/db/db1 | db/db | 1187 | 0.130374 | TRUE  | 12.58883 | TRUE  |                        |
| TGGGAAG/db/db1 | db/db | 897  | 0.033726 | FALSE | 0.690393 | FALSE | Photoreceptor          |
| TGGGAAG/db/db1 | db/db | 2957 | 0.020908 | FALSE | 0.805422 | FALSE | Photoreceptor          |
| TGGGAAG/db/db1 | db/db | 2352 | 0.016488 | FALSE | 0.853463 | FALSE | Photoreceptor          |
| TGGGAAG/db/db1 | db/db | 4522 | 0.067388 | FALSE | 0.808111 | FALSE | Endothelia Venous EC   |
| TGGGAAG/db/db1 | db/db | 1478 | 0.020536 | FALSE | 1.605475 | FALSE | Endothelia Capillary E |
| TGGGAAG/db/db1 | db/db | 911  | 0.017114 | FALSE | 1.803687 | FALSE | Endothelia Capillary E |
| TGGGAAG/db/db1 | db/db | 2359 | 0.011805 | FALSE | 1.002584 | FALSE | Endothelia EC-C4       |
| TGGGAAG/db/db1 | db/db | 2755 | 0.046906 | FALSE | 0.691989 | FALSE | Photoreceptor          |
| TGGGAGA/db/db1 | db/db | 4212 | 0.025868 | FALSE | 0.84562  | FALSE | Endothelia Venous EC   |
| TGGGAGA/db/db1 | db/db | 3031 | 0.656627 | TRUE  | 4.143157 | FALSE |                        |
| TGGGAGA/db/db1 | db/db | 1130 | 0.053718 | FALSE | 1.363849 | FALSE | Endothelia Capillary E |
| TGGGAGA/db/db1 | db/db | 525  | 0.334395 | TRUE  | 5.789474 | TRUE  |                        |
| TGGGAGA/db/db1 | db/db | 2705 | 0.076994 | FALSE | 0.953054 | FALSE | Neuron                 |
| TGGGAGA/db/db1 | db/db | 854  | 0.029266 | FALSE | 0.457586 | FALSE | Photoreceptor          |
| TGGGAGA/db/db1 | db/db | 2218 | 0.020908 | FALSE | 0.67025  | FALSE | Photoreceptor          |
| TGGGAGA/db/db1 | db/db | 1924 | 0.150727 | TRUE  | 4.298391 | FALSE |                        |
| TGGGATT/db/db1 | db/db | 576  | 0.041154 | FALSE | 2.927934 | FALSE | Muller cell            |
| TGGGATT/db/db1 | db/db | 1046 | 0.032546 | FALSE | 1.824895 | FALSE | Photoreceptor          |
| TGGGATT/db/db1 | db/db | 6305 | 0.01981  | FALSE | 0.414628 | FALSE | Photoreceptor          |
| TGGGATT/db/db1 | db/db | 700  | 0.115641 | TRUE  | 4.468719 | FALSE |                        |
| TGGGATT/db/db1 | db/db | 2772 | 0.013074 | FALSE | 1.015366 | FALSE | Endothelia Venous EC   |
| TGGGATT/db/db1 | db/db | 1503 | 0.009493 | FALSE | 1.20212  | FALSE | Endothelia Capillary E |
| TGGGATT/db/db1 | db/db | 2337 | 0.015879 | FALSE | 0.676474 | FALSE | Photoreceptor          |
| TGGGATT/db/db1 | db/db | 440  | 0.034334 | FALSE | 2.46084  | FALSE | Photoreceptor          |
| TGGGCGT/db/db1 | db/db | 793  | 0.068864 | FALSE | 1.776154 | FALSE | Endothelia Capillary E |
| TGGGCGT/db/db1 | db/db | 5821 | 0.026796 | FALSE | 0.778513 | FALSE | Photoreceptor          |
| TGGGCGT/db/db1 | db/db | 707  | 0.048732 | FALSE | 1.928615 | FALSE | Photoreceptor          |
| TGGGCGT/db/db1 | db/db | 957  | 0.021669 | FALSE | 1.454017 | FALSE | Endothelia Capillary E |
| TGGGCGT/db/db1 | db/db | 587  | 0.05065  | FALSE | 4.223909 | FALSE | Muller cell            |
| TGGGCGT/db/db1 | db/db | 613  | 0.007636 | FALSE | 1.379718 | FALSE | Pericyte               |
| TGGGCTG/db/db1 | db/db | 2620 | 0.025416 | FALSE | 1.008197 | FALSE | Photoreceptor          |
| TGGGCTG/db/db1 | db/db | 832  | 0.029266 | FALSE | 1.22445  | FALSE | Photoreceptor          |
| TGGGCTG/db/db1 | db/db | 5069 | 0.024105 | FALSE | 0.873456 | FALSE | Endothelia EC-C4       |

|                |       |      |          |       |          |       |                        |
|----------------|-------|------|----------|-------|----------|-------|------------------------|
| TGGGCTG(db/db1 | db/db | 3901 | 0.031411 | FALSE | 1.327448 | FALSE | Photoreceptor          |
| TGGGCTG(db/db1 | db/db | 1246 | 0.073582 | FALSE | 1.549474 | FALSE | Photoreceptor          |
| TGGGCTG db/db1 | db/db | 4170 | 0.042704 | FALSE | 0.953594 | FALSE | Endothelia Venous EC   |
| TGGGCTG db/db1 | db/db | 2047 | 0.051646 | FALSE | 0.939851 | FALSE | Photoreceptor          |
| TGGGTTA db/db1 | db/db | 905  | 0.027273 | FALSE | 0.797955 | FALSE | Photoreceptor          |
| TGGGTTA(db/db1 | db/db | 739  | 0.044326 | FALSE | 1.96533  | FALSE | Photoreceptor          |
| TGGGTTA(db/db1 | db/db | 1330 | 0.019106 | FALSE | 1.154842 | FALSE | Endothelia EC-C4       |
| TGGGTTA(db/db1 | db/db | 4064 | 0.112477 | TRUE  | 3.03826  | FALSE |                        |
| TGGGTTA db/db1 | db/db | 994  | 0.061912 | FALSE | 1.461196 | FALSE | Photoreceptor          |
| TGGGTTA db/db1 | db/db | 1768 | 0.027273 | FALSE | 0.92045  | FALSE | Neuron                 |
| TGGGTTA db/db1 | db/db | 1427 | 0.05065  | FALSE | 1.166529 | FALSE | Photoreceptor          |
| TGGTACA db/db1 | db/db | 4491 | 0.036232 | FALSE | 0.689218 | FALSE | Photoreceptor          |
| TGGTACA db/db1 | db/db | 1441 | 0.044326 | FALSE | 1.126798 | FALSE | Endothelia Capillary E |
| TGGTACA(db/db1 | db/db | 2643 | 0.24     | TRUE  | 3.725454 | FALSE |                        |
| TGGTACA(db/db1 | db/db | 3038 | 0.024971 | FALSE | 0.805292 | FALSE | Endothelia EC-C4       |
| TGGTACA(db/db1 | db/db | 4132 | 0.014711 | FALSE | 0.552425 | FALSE | Endothelia Venous EC   |
| TGGTAGT db/db1 | db/db | 1392 | 0.024105 | FALSE | 1.320467 | FALSE | Endothelia Capillary E |
| TGGTAGT(db/db1 | db/db | 3064 | 0.049679 | FALSE | 0.923294 | FALSE | Endothelia Venous EC   |
| TGGTAGT(db/db1 | db/db | 2624 | 0.00687  | FALSE | 0.960451 | FALSE | Neuron                 |
| TGGTAGT(db/db1 | db/db | 3623 | 0.01981  | FALSE | 1.107897 | FALSE | Endothelia Venous EC   |
| TGGTAGT(db/db1 | db/db | 1038 | 0.047807 | FALSE | 1.215955 | FALSE | Photoreceptor          |
| TGGTAGT(db/db1 | db/db | 7271 | 0.023266 | FALSE | 0.545185 | FALSE | Photoreceptor          |
| TGGTAGT db/db1 | db/db | 4025 | 0.177638 | TRUE  | 3.481953 | FALSE |                        |
| TGGTAGT db/db1 | db/db | 1667 | 0.018088 | FALSE | 0.506188 | FALSE | Photoreceptor          |
| TGGTAGT db/db1 | db/db | 3771 | 0.04192  | FALSE | 0.93232  | FALSE | Photoreceptor          |
| TGGTAGT db/db1 | db/db | 2130 | 0.030859 | FALSE | 0.817006 | FALSE | Photoreceptor          |
| TGGTGAT db/db1 | db/db | 727  | 0.054795 | FALSE | 1.589132 | FALSE | Photoreceptor          |
| TGGTGAT(db/db1 | db/db | 2282 | 0.009712 | FALSE | 1.017151 | FALSE | Endothelia Capillary E |
| TGGTGAT(db/db1 | db/db | 2533 | 0.075259 | FALSE | 1.371915 | FALSE | Endothelia Capillary E |
| TGGTGAT(db/db1 | db/db | 1609 | 0.016181 | FALSE | 1.175083 | FALSE | Endothelia Capillary E |
| TGGTGAT(db/db1 | db/db | 1613 | 0.007441 | FALSE | 1.370052 | FALSE | Neuron                 |
| TGGTGAT db/db1 | db/db | 846  | 0.064568 | FALSE | 0.932055 | FALSE | Photoreceptor          |
| TGGTGAT db/db1 | db/db | 426  | 0.036232 | FALSE | 7.504691 | TRUE  |                        |
| TGGTTAG db/db1 | db/db | 1075 | 0.04192  | FALSE | 1.241184 | FALSE | Endothelia Capillary E |
| TGGTTAG db/db1 | db/db | 711  | 0.022455 | FALSE | 1.437979 | FALSE | Endothelia Venous EC   |
| TGGTTAG db/db1 | db/db | 478  | 0.017758 | FALSE | 0.660717 | FALSE | Photoreceptor          |
| TGGTTAG db/db1 | db/db | 565  | 0.008234 | FALSE | 1.521553 | FALSE | Endothelia Capillary E |
| TGGTTAG(db/db1 | db/db | 1099 | 0.051646 | FALSE | 1.596807 | FALSE | Photoreceptor          |
| TGGTTAG(db/db1 | db/db | 1073 | 0.025416 | FALSE | 1.17918  | FALSE | Photoreceptor          |
| TGGTTAG(db/db1 | db/db | 3319 | 0.135645 | TRUE  | 2.816901 | FALSE |                        |
| TGGTTAG(db/db1 | db/db | 2070 | 0.027758 | FALSE | 1.124334 | FALSE | Endothelia EC-C4       |
| TGGTTAG db/db1 | db/db | 762  | 0.058205 | FALSE | 2.077474 | FALSE | Endothelia Venous EC   |
| TGTAACG db/db1 | db/db | 8191 | 0.019455 | FALSE | 0.621181 | FALSE | Photoreceptor          |
| TGTAACG(db/db1 | db/db | 889  | 0.053718 | FALSE | 3.639496 | FALSE | Muller cell            |
| TGTAACG(db/db1 | db/db | 4946 | 0.044326 | FALSE | 0.83886  | FALSE | Photoreceptor          |
| TGTAACG(db/db1 | db/db | 1552 | 0.009063 | FALSE | 0.948914 | FALSE | Endothelia EC-C4       |
| TGTAACG(db/db1 | db/db | 5058 | 0.314286 | TRUE  | 1.559303 | FALSE |                        |

|                 |       |      |          |       |          |       |                        |
|-----------------|-------|------|----------|-------|----------|-------|------------------------|
| TGTAACGT db/db1 | db/db | 662  | 0.038953 | FALSE | 1.581261 | FALSE | Muller cell            |
| TGTAAGC db/db1  | db/db | 868  | 0.018088 | FALSE | 0.45123  | FALSE | Photoreceptor          |
| TGTAAGCC db/db1 | db/db | 2893 | 0.016799 | FALSE | 0.781539 | FALSE | Photoreceptor          |
| TGTAAGCC db/db1 | db/db | 425  | 0.045165 | FALSE | 4.030979 | FALSE | Muller cell            |
| TGTAAGCC db/db1 | db/db | 1772 | 0.038953 | FALSE | 1.191986 | FALSE | Endothelia Capillary E |
| TGTAAGCC db/db1 | db/db | 588  | 0.011081 | FALSE | 0.319287 | FALSE | Photoreceptor          |
| TGTAAGCT db/db1 | db/db | 5573 | 0.019455 | FALSE | 0.635521 | FALSE | Photoreceptor          |
| TGTACAG db/db1  | db/db | 6037 | 0.032546 | FALSE | 0.813528 | FALSE | Photoreceptor          |
| TGTACAG db/db1  | db/db | 3133 | 0.019455 | FALSE | 0.570788 | FALSE | Photoreceptor          |
| TGTACAG db/db1  | db/db | 1132 | 0.060641 | FALSE | 0.577591 | FALSE | Neuron                 |
| TGTACAGC db/db1 | db/db | 481  | 0.026796 | FALSE | 0.196611 | FALSE | Photoreceptor          |
| TGTACAGC db/db1 | db/db | 2085 | 0.228861 | TRUE  | 5.900447 | TRUE  |                        |
| TGTACAGC db/db1 | db/db | 3327 | 0.030859 | FALSE | 0.587665 | FALSE | Photoreceptor          |
| TGTACAGC db/db1 | db/db | 2296 | 0.035586 | FALSE | 1.608559 | FALSE | Endothelia Aterial EC  |
| TGTACAGT db/db1 | db/db | 1377 | 0.024971 | FALSE | 0.724206 | FALSE | Photoreceptor          |
| TGTAGAC db/db1  | db/db | 379  | 0.030859 | FALSE | 3.806975 | FALSE | Muller cell            |
| TGTAGACC db/db1 | db/db | 442  | 0.028251 | FALSE | 1.647763 | FALSE | Endothelia Capillary E |
| TGTAGACC db/db1 | db/db | 617  | 0.100845 | TRUE  | 3.736264 | FALSE |                        |
| TGTAGACC db/db1 | db/db | 641  | 0.038953 | FALSE | 1.974625 | FALSE | Photoreceptor          |
| TGTAGACC db/db1 | db/db | 395  | 0.019106 | FALSE | 1.138545 | FALSE | Endothelia EC-C4       |
| TGTCAGA db/db1  | db/db | 1597 | 0.015879 | FALSE | 1.072967 | FALSE | Pericyte               |
| TGTCAGAC db/db1 | db/db | 2323 | 0.009933 | FALSE | 1.255044 | FALSE | Endothelia Capillary E |
| TGTCAGAC db/db1 | db/db | 4536 | 0.05065  | FALSE | 0.883059 | FALSE | Endothelia Venous EC   |
| TGTCAGAC db/db1 | db/db | 1640 | 0.017114 | FALSE | 1.328673 | FALSE | Endothelia Venous EC   |
| TGTCAGAC db/db1 | db/db | 1809 | 0.065957 | FALSE | 1.270437 | FALSE | Photoreceptor          |
| TGTCAGAC db/db1 | db/db | 5180 | 0.020536 | FALSE | 0.73216  | FALSE | Photoreceptor          |
| TGTCAGAC db/db1 | db/db | 2506 | 0.058205 | FALSE | 1.149513 | FALSE | Photoreceptor          |
| TGTCAGAT db/db1 | db/db | 3515 | 0.022059 | FALSE | 1.030863 | FALSE | Photoreceptor          |
| TGTCCACA db/db1 | db/db | 1906 | 0.043505 | FALSE | 1.574926 | FALSE | Endothelia Capillary E |
| TGTCCACA db/db1 | db/db | 7050 | 0.064568 | FALSE | 0.780655 | FALSE | Photoreceptor          |
| TGTCCACA db/db1 | db/db | 3185 | 0.013074 | FALSE | 0.937131 | FALSE | Endothelia EC-C4       |
| TGTCCACC db/db1 | db/db | 1010 | 0.265464 | TRUE  | 5.662983 | TRUE  |                        |
| TGTCCACC db/db1 | db/db | 697  | 0.016488 | FALSE | 2.278309 | FALSE | Muller cell            |
| TGTCCACC db/db1 | db/db | 3283 | 0.028754 | FALSE | 0.597805 | FALSE | Photoreceptor          |
| TGTCCACC db/db1 | db/db | 2329 | 0.009277 | FALSE | 1.075097 | FALSE | Endothelia Venous EC   |
| TGTCCACT db/db1 | db/db | 3088 | 0.007833 | FALSE | 1.113425 | FALSE | Neuron                 |
| TGTCCACT db/db1 | db/db | 1482 | 0.076994 | FALSE | 1.243727 | FALSE | Photoreceptor          |
| TGTCCCAA db/db1 | db/db | 540  | 0.007833 | FALSE | 2.227216 | FALSE | Pericyte               |
| TGTCCCAA db/db1 | db/db | 2882 | 0.055901 | FALSE | 1.105826 | FALSE | Photoreceptor          |
| TGTCCCAA db/db1 | db/db | 1607 | 0.03313  | FALSE | 1.355277 | FALSE | Endothelia EC-C4       |
| TGTCCCAC db/db1 | db/db | 2257 | 0.059406 | FALSE | 1.006659 | FALSE | Photoreceptor          |
| TGTCCCAC db/db1 | db/db | 495  | 0.075259 | FALSE | 6.060606 | TRUE  |                        |
| TGTCCCAC db/db1 | db/db | 1762 | 0.020908 | FALSE | 1.12738  | FALSE | Endothelia Capillary E |
| TGTCCCAC db/db1 | db/db | 1478 | 0.025416 | FALSE | 1.872188 | FALSE | Endothelia Capillary E |
| TGTCCCAC db/db1 | db/db | 3814 | 0.061912 | FALSE | 0.982217 | FALSE | Photoreceptor          |
| TGTCCCAG db/db1 | db/db | 1208 | 0.038251 | FALSE | 0.920818 | FALSE | Endothelia Capillary E |
| TGTCCCAT db/db1 | db/db | 2702 | 0.027273 | FALSE | 0.446648 | FALSE | Photoreceptor          |

|                 |       |      |          |       |          |       |                        |
|-----------------|-------|------|----------|-------|----------|-------|------------------------|
| TGTCCCAT db/db1 | db/db | 444  | 0.020908 | FALSE | 2.914205 | FALSE | Endothelia Capillary E |
| TGTCCTGC db/db1 | db/db | 527  | 0.029787 | FALSE | 3.288115 | FALSE | Muller cell            |
| TGTCCTGT db/db1 | db/db | 883  | 0.004762 | FALSE | 1.490064 | FALSE | Endothelia Capillary E |
| TGTCCTGT db/db1 | db/db | 1950 | 0.122691 | TRUE  | 5.502793 | TRUE  |                        |
| TGTCCTGT db/db1 | db/db | 889  | 0.070386 | FALSE | 1.832297 | FALSE | Photoreceptor          |
| TGTCCTGT db/db1 | db/db | 789  | 0.029787 | FALSE | 3.590272 | FALSE | Muller cell            |
| TGTGAGT( db/db1 | db/db | 4779 | 0.038251 | FALSE | 0.988607 | FALSE | Endothelia Venous EC   |
| TGTGAGT( db/db1 | db/db | 1486 | 0.027758 | FALSE | 1.248988 | FALSE | Endothelia Capillary E |
| TGTGAGT( db/db1 | db/db | 798  | 0.063221 | FALSE | 1.655754 | FALSE | Photoreceptor          |
| TGTGAGT  db/db1 | db/db | 2793 | 0.073582 | FALSE | 1.147469 | FALSE | Endothelia EC-C4       |
| TGTGAGT  db/db1 | db/db | 507  | 0.026328 | FALSE | 3.400053 | FALSE | Neuron                 |
| TGTGATG( db/db1 | db/db | 872  | 0.063221 | FALSE | 10.34722 | TRUE  |                        |
| TGTGATG( db/db1 | db/db | 2656 | 0.039671 | FALSE | 1.1252   | FALSE | Photoreceptor          |
| TGTGATG( db/db1 | db/db | 1871 | 0.032546 | FALSE | 1.189699 | FALSE | Endothelia Capillary E |
| TGTGATG( db/db1 | db/db | 845  | 0.014711 | FALSE | 1.829044 | FALSE | Pericyte               |
| TGTGATG  db/db1 | db/db | 3926 | 0.030859 | FALSE | 0.959542 | FALSE | Endothelia EC-C4       |
| TGTGATG  db/db1 | db/db | 1754 | 0.068864 | FALSE | 1.416942 | FALSE | Photoreceptor          |
| TGTGATG  db/db1 | db/db | 1130 | 0.067388 | FALSE | 1.472645 | FALSE | Photoreceptor          |
| TGTGCGG( db/db1 | db/db | 434  | 0.048732 | FALSE | 2.171652 | FALSE | Photoreceptor          |
| TGTGCGG( db/db1 | db/db | 642  | 0.095727 | FALSE | 21.10092 | TRUE  |                        |
| TGTGCGG( db/db1 | db/db | 414  | 0.031973 | FALSE | 0.757272 | FALSE | Photoreceptor          |
| TGTGCGG( db/db1 | db/db | 648  | 0.054795 | FALSE | 0.338941 | FALSE | Photoreceptor          |
| TGTGCGG( db/db1 | db/db | 2225 | 0.017434 | FALSE | 1.1197   | FALSE | Endothelia Capillary E |
| TGTGGCG/ db/db1 | db/db | 388  | 0.057037 | FALSE | 2.575329 | FALSE | Photoreceptor          |
| TGTGGCG/ db/db1 | db/db | 2151 | 0.022059 | FALSE | 1.199091 | FALSE | Endothelia Capillary E |
| TGTGGCG/ db/db1 | db/db | 1055 | 0.098234 | FALSE | 1.982999 | FALSE | Photoreceptor          |
| TGTGGCG/ db/db1 | db/db | 3746 | 0.150727 | TRUE  | 1.944911 | FALSE |                        |
| TGTGGCG/ db/db1 | db/db | 1197 | 0.036232 | FALSE | 1.778699 | FALSE | Endothelia Capillary E |
| TGTGGCG( db/db1 | db/db | 4755 | 0.014997 | FALSE | 0.636829 | FALSE | Photoreceptor          |
| TGTGGCG( db/db1 | db/db | 1101 | 0.057037 | FALSE | 1.272917 | FALSE | Photoreceptor          |
| TGTGGCG( db/db1 | db/db | 3584 | 0.022857 | FALSE | 1.048475 | FALSE | Photoreceptor          |
| TGTGGCG( db/db1 | db/db | 947  | 0.067388 | FALSE | 1.479064 | FALSE | Photoreceptor          |
| TGTGGCG  db/db1 | db/db | 6955 | 0.015581 | FALSE | 0.510514 | FALSE | Photoreceptor          |
| TGTGGCG  db/db1 | db/db | 1531 | 0.020908 | FALSE | 1.036682 | FALSE | Endothelia Aterial EC  |
| TGTGGCG  db/db1 | db/db | 551  | 0.013876 | FALSE | 2.077777 | FALSE | Pericyte               |
| TGTGTGA/ db/db1 | db/db | 674  | 0.058205 | FALSE | 1.173779 | FALSE | Photoreceptor          |
| TGTGTGA/ db/db1 | db/db | 492  | 0.017114 | FALSE | 2.510365 | FALSE | Muller cell            |
| TGTGTGA/ db/db1 | db/db | 508  | 0.010384 | FALSE | 0.53683  | FALSE | Photoreceptor          |
| TGTGTGA( db/db1 | db/db | 938  | 0.041154 | FALSE | 2.156639 | FALSE | Endothelia Capillary E |
| TGTGTGA( db/db1 | db/db | 1036 | 0.04192  | FALSE | 1.661114 | FALSE | Endothelia Capillary E |
| TGTGTGA  db/db1 | db/db | 2651 | 0.080645 | FALSE | 5.127686 | TRUE  |                        |
| TGTGTGA  db/db1 | db/db | 903  | 0.100845 | TRUE  | 7.327586 | TRUE  |                        |
| TGTTACTA db/db1 | db/db | 1516 | 0.051646 | FALSE | 1.174636 | FALSE | Endothelia EC-C4       |
| TGTTACTC db/db1 | db/db | 2097 | 0.038953 | FALSE | 1.221634 | FALSE | Endothelia Venous EC   |
| TGTTACTC db/db1 | db/db | 765  | 0.029787 | FALSE | 1.132147 | FALSE | Photoreceptor          |
| TGTTACTC db/db1 | db/db | 1093 | 0.098234 | FALSE | 2.529169 | FALSE | Muller cell            |
| TGTTACTG db/db1 | db/db | 2672 | 0.011319 | FALSE | 0.947694 | FALSE | Photoreceptor          |

|                 |       |      |          |       |          |       |                        |
|-----------------|-------|------|----------|-------|----------|-------|------------------------|
| TGTTACTG db/db1 | db/db | 862  | 0.023266 | FALSE | 2.271032 | FALSE | Microglia              |
| TGTTACTT db/db1 | db/db | 5129 | 0.093319 | FALSE | 0.686803 | FALSE | Endothelia Venous EC   |
| TGTTACTT db/db1 | db/db | 1030 | 0.039671 | FALSE | 1.50654  | FALSE | Photoreceptor          |
| TGTTCATA db/db1 | db/db | 7362 | 0.013876 | FALSE | 0.540156 | FALSE | Photoreceptor          |
| TGTTCATA db/db1 | db/db | 369  | 0.016799 | FALSE | 1.728017 | FALSE | Photoreceptor          |
| TGTTCATC db/db1 | db/db | 2225 | 0.003959 | FALSE | 0.953023 | FALSE | Neuron                 |
| TGTTCATC db/db1 | db/db | 717  | 0.118221 | TRUE  | 3.121853 | FALSE |                        |
| TGTTCATC db/db1 | db/db | 2668 | 0.058205 | FALSE | 1.22762  | FALSE | Photoreceptor          |
| TGTTCATT db/db1 | db/db | 2663 | 0.011805 | FALSE | 1.218095 | FALSE | Endothelia EC-C4       |
| TGTTCATT db/db1 | db/db | 703  | 0.08663  | FALSE | 1.20034  | FALSE | Photoreceptor          |
| TGTTCCGA db/db1 | db/db | 1240 | 0.015581 | FALSE | 1.319547 | FALSE | Endothelia Capillary E |
| TGTTCCGA db/db1 | db/db | 2263 | 0.013876 | FALSE | 0.959492 | FALSE | Endothelia Venous EC   |
| TGTTCCGA db/db1 | db/db | 453  | 0.073582 | FALSE | 3.365089 | FALSE | Endothelia Capillary E |
| TGTTCCGC db/db1 | db/db | 1072 | 0.123864 | TRUE  | 4.642639 | FALSE |                        |
| TGTTCCGC db/db1 | db/db | 871  | 0.012557 | FALSE | 1.383545 | FALSE | Endothelia Aterial EC  |
| TGTTCCGT db/db1 | db/db | 444  | 0.026796 | FALSE | 2.275751 | FALSE | Photoreceptor          |
| TGTTCTAA db/db1 | db/db | 610  | 0.052669 | FALSE | 1.561545 | FALSE | Photoreceptor          |
| TGTTCTAA db/db1 | db/db | 7547 | 0.020171 | FALSE | 0.660945 | FALSE | Photoreceptor          |
| TGTTCTAA db/db1 | db/db | 1112 | 0.023266 | FALSE | 1.767014 | FALSE | Endothelia Capillary E |
| TGTTCTAG db/db1 | db/db | 3738 | 0.031411 | FALSE | 0.952842 | FALSE | Endothelia EC-C4       |
| TGTTCTAG db/db1 | db/db | 1508 | 0.035586 | FALSE | 1.11308  | FALSE | Endothelia Capillary E |
| TGTTCTAG db/db1 | db/db | 553  | 0.070386 | FALSE | 9.494452 | TRUE  |                        |
| TGTTCTAT db/db1 | db/db | 3865 | 0.031973 | FALSE | 1.006043 | FALSE | Photoreceptor          |
| TGTTGAG db/db1  | db/db | 1297 | 0.015879 | FALSE | 1.170473 | FALSE | Endothelia Capillary E |
| TGTTGAG db/db1  | db/db | 7181 | 0.029787 | FALSE | 0.585683 | FALSE | Photoreceptor          |
| TGTTGAG db/db1  | db/db | 5193 | 0.028251 | FALSE | 0.714609 | FALSE | Endothelia Venous EC   |
| TGTTGAG db/db1  | db/db | 3541 | 0.022059 | FALSE | 1.246939 | FALSE | Photoreceptor          |
| TGTTGAG db/db1  | db/db | 1833 | 0.012303 | FALSE | 1.225732 | FALSE | Endothelia Capillary E |
| TGTTGAG db/db1  | db/db | 3327 | 0.228861 | TRUE  | 2.970297 | FALSE |                        |
| TGTTGAG db/db1  | db/db | 498  | 0.039671 | FALSE | 3.468397 | FALSE | Neuron                 |
| TGTTGAG db/db1  | db/db | 1887 | 0.209157 | TRUE  | 7.546174 | TRUE  |                        |
| TGTTGAG db/db1  | db/db | 662  | 0.020536 | FALSE | 1.854548 | FALSE | Muller cell            |
| TGTTGGA db/db1  | db/db | 1462 | 0.024105 | FALSE | 1.406579 | FALSE | Endothelia Capillary E |
| TGTTGGA db/db1  | db/db | 1051 | 0.028754 | FALSE | 2.446652 | FALSE | Muller cell            |
| TGTTGGA db/db1  | db/db | 4169 | 0.020536 | FALSE | 0.832396 | FALSE | Photoreceptor          |
| TGTTGGA db/db1  | db/db | 3185 | 0.135645 | TRUE  | 1.530389 | FALSE |                        |
| TGTTGGA db/db1  | db/db | 4508 | 0.064568 | FALSE | 1.020636 | FALSE | Photoreceptor          |
| TGTTGGA db/db1  | db/db | 2922 | 0.029266 | FALSE | 1.021093 | FALSE | Photoreceptor          |
| TGTTGGA db/db1  | db/db | 3779 | 0.031411 | FALSE | 0.853194 | FALSE | Endothelia Venous EC   |
| TGTTGGA db/db1  | db/db | 1503 | 0.032546 | FALSE | 0.948274 | FALSE | Endothelia Aterial EC  |
| TGTTGGA db/db1  | db/db | 4490 | 0.022455 | FALSE | 0.860707 | FALSE | Photoreceptor          |
| TGTTGGA db/db1  | db/db | 516  | 0.054795 | FALSE | 1.503049 | FALSE | Photoreceptor          |
| TGTTTGTA db/db1 | db/db | 901  | 0.115723 | TRUE  | 7.418398 | TRUE  |                        |
| TGTTTGTC db/db1 | db/db | 1232 | 0.034334 | FALSE | 1.395471 | FALSE | Pericyte               |
| TGTTTGTC db/db1 | db/db | 1039 | 0.067388 | FALSE | 2.870739 | FALSE | Muller cell            |
| TGTTTGTT db/db1 | db/db | 2358 | 0.014429 | FALSE | 0.600616 | FALSE | Photoreceptor          |
| TTAATCCA db/db1 | db/db | 1062 | 0.037564 | FALSE | 0.96003  | FALSE | Photoreceptor          |



|                 |       |      |          |       |          |       |                         |
|-----------------|-------|------|----------|-------|----------|-------|-------------------------|
| TTAATCCC db/db1 | db/db | 8316 | 0.012052 | FALSE | 0.507632 | FALSE | Photoreceptor           |
| TTAATCCC db/db1 | db/db | 4097 | 0.051646 | FALSE | 0.605695 | FALSE | Endothelia Venous EC    |
| TTAATCCT db/db1 | db/db | 7551 | 0.016488 | FALSE | 0.608901 | FALSE | Photoreceptor           |
| TTACAGG db/db1  | db/db | 1171 | 0.046906 | FALSE | 1.370895 | FALSE | Photoreceptor           |
| TTACAGG db/db1  | db/db | 615  | 0.008032 | FALSE | 1.115029 | FALSE | Endothelia Capillary EC |
| TTACAGG db/db1  | db/db | 2053 | 0.013876 | FALSE | 0.934015 | FALSE | Endothelia Capillary EC |
| TTACAGG db/db1  | db/db | 2540 | 0.024971 | FALSE | 0.54947  | FALSE | Microglia               |
| TTACAGG db/db1  | db/db | 1147 | 0.007833 | FALSE | 1.103831 | FALSE | Pericyte                |
| TTACAGG db/db1  | db/db | 1810 | 0.065957 | FALSE | 1.172573 | FALSE | Endothelia EC-C4        |
| TTACAGG db/db1  | db/db | 2609 | 0.047807 | FALSE | 1.06162  | FALSE | Photoreceptor           |
| TTACCATA db/db1 | db/db | 1767 | 0.011561 | FALSE | 0.86143  | FALSE | Endothelia Capillary EC |
| TTACCATA db/db1 | db/db | 720  | 0.008852 | FALSE | 3.004449 | FALSE | Pericyte                |
| TTACCATA db/db1 | db/db | 7591 | 0.018422 | FALSE | 0.65254  | FALSE | Photoreceptor           |
| TTACCATA db/db1 | db/db | 831  | 0.034954 | FALSE | 1.004225 | FALSE | Photoreceptor           |
| TTACCATC db/db1 | db/db | 1679 | 0.045165 | FALSE | 1.023569 | FALSE | Photoreceptor           |
| TTACCATC db/db1 | db/db | 7544 | 0.017114 | FALSE | 0.485889 | FALSE | Photoreceptor           |
| TTACCATG db/db1 | db/db | 4654 | 0.025416 | FALSE | 0.911411 | FALSE | Photoreceptor           |
| TTACCATT db/db1 | db/db | 1867 | 0.012052 | FALSE | 0.430501 | FALSE | Photoreceptor           |
| TTACCATT db/db1 | db/db | 2150 | 0.015581 | FALSE | 1.189982 | FALSE | Endothelia Venous EC    |
| TTACCATT db/db1 | db/db | 1091 | 0.046025 | FALSE | 1.847797 | FALSE | Photoreceptor           |
| TTACCGCA db/db1 | db/db | 4867 | 0.138889 | TRUE  | 1.514219 | FALSE |                         |
| TTACCGCC db/db1 | db/db | 381  | 0.071958 | FALSE | 2.208218 | FALSE | Endothelia Capillary EC |
| TTACCGCC db/db1 | db/db | 2825 | 0.023682 | FALSE | 0.813    | FALSE | Endothelia Venous EC    |
| TTACCGCC db/db1 | db/db | 1608 | 0.021669 | FALSE | 1.144036 | FALSE | Endothelia Capillary EC |
| TTACCGCC db/db1 | db/db | 7160 | 0.184701 | TRUE  | 0.892857 | FALSE |                         |
| TTACCGCC db/db1 | db/db | 2166 | 0.022455 | FALSE | 1.072189 | FALSE | Endothelia Capillary EC |
| TTACCGCT db/db1 | db/db | 3237 | 0.013074 | FALSE | 0.96251  | FALSE | Endothelia Capillary EC |
| TTACGCCA db/db1 | db/db | 2316 | 0.159016 | TRUE  | 4.344905 | FALSE |                         |
| TTACGCCA db/db1 | db/db | 286  | 0.040404 | FALSE | 2.70476  | FALSE | Microglia               |
| TTACGCCC db/db1 | db/db | 502  | 0.018422 | FALSE | 3.171693 | FALSE | Endothelia Capillary EC |
| TTACGCCC db/db1 | db/db | 497  | 0.076994 | FALSE | 2.278435 | FALSE | Endothelia Capillary EC |
| TTACGCCC db/db1 | db/db | 601  | 0.071958 | FALSE | 2.235174 | FALSE | Muller cell             |
| TTACGCCC db/db1 | db/db | 7546 | 0.015581 | FALSE | 0.674281 | FALSE | Photoreceptor           |
| TTACGCCT db/db1 | db/db | 2667 | 0.029787 | FALSE | 1.059573 | FALSE | Endothelia Capillary EC |
| TTACGCCT db/db1 | db/db | 1036 | 0.012814 | FALSE | 0.618228 | FALSE | Endothelia Capillary EC |
| TTACGTTA db/db1 | db/db | 2827 | 0.026328 | FALSE | 1.104962 | FALSE | Endothelia Capillary EC |
| TTACGTTC db/db1 | db/db | 467  | 0.088776 | FALSE | 2.552767 | FALSE | Muller cell             |
| TTACGTTG db/db1 | db/db | 890  | 0.044326 | FALSE | 1.785604 | FALSE | Endothelia Capillary EC |
| TTACGTTG db/db1 | db/db | 2880 | 0.031411 | FALSE | 0.896574 | FALSE | Photoreceptor           |
| TTACGTTG db/db1 | db/db | 1351 | 0.010846 | FALSE | 1.150755 | FALSE | Endothelia Capillary EC |
| TTACGTTT db/db1 | db/db | 2016 | 0.015287 | FALSE | 1.088552 | FALSE | Endothelia Capillary EC |
| TTACTGTA db/db1 | db/db | 3620 | 0.028754 | FALSE | 0.819347 | FALSE | Photoreceptor           |
| TTACTGTA db/db1 | db/db | 2995 | 0.068864 | FALSE | 1.171636 | FALSE | Photoreceptor           |
| TTACTGTG db/db1 | db/db | 1935 | 0.037564 | FALSE | 0.879967 | FALSE | Pericyte                |
| TTACTGTT db/db1 | db/db | 1423 | 0.095727 | FALSE | 1.085127 | FALSE | Photoreceptor           |
| TTACTGTT db/db1 | db/db | 5171 | 0.018761 | FALSE | 0.616705 | FALSE | Photoreceptor           |
| TTACTGTT db/db1 | db/db | 537  | 0.018761 | FALSE | 1.383989 | FALSE | Endothelia Capillary EC |

|                  |       |      |          |       |          |       |                        |
|------------------|-------|------|----------|-------|----------|-------|------------------------|
| TTAGGCA/ db/db1  | db/db | 1471 | 0.010157 | FALSE | 0.884211 | FALSE | Endothelia Aterial EC  |
| TTAGGCA/ db/db1  | db/db | 8127 | 0.013074 | FALSE | 0.508124 | FALSE | Photoreceptor          |
| TTAGGCA/ db/db1  | db/db | 1739 | 0.024534 | FALSE | 1.153597 | FALSE | Neuron                 |
| TTAGGCA( db/db1  | db/db | 6991 | 0.357022 | TRUE  | 1.293266 | FALSE |                        |
| TTAGGCA( db/db1  | db/db | 1186 | 0.064568 | FALSE | 1.666116 | FALSE | Photoreceptor          |
| TTAGGCA( db/db1  | db/db | 1559 | 0.119124 | TRUE  | 2.996845 | FALSE |                        |
| TTAGGCA( db/db1  | db/db | 783  | 0.017114 | FALSE | 1.662077 | FALSE | Pericyte               |
| TTAGGCA( db/db1  | db/db | 3260 | 0.020908 | FALSE | 0.876616 | FALSE | Endothelia Aterial EC  |
| TTAGGCAI db/db1  | db/db | 4430 | 0.036891 | FALSE | 0.966773 | FALSE | Endothelia Aterial EC  |
| TTAGGCAI db/db1  | db/db | 4693 | 0.043505 | FALSE | 0.642404 | FALSE | Endothelia Venous EC   |
| TTAGGGT/ db/db1  | db/db | 1529 | 0.084562 | FALSE | 1.479778 | FALSE | Photoreceptor          |
| TTAGGGT/ db/db1  | db/db | 2605 | 0.026796 | FALSE | 1.128358 | FALSE | Endothelia Venous EC   |
| TTAGGGT( db/db1  | db/db | 1769 | 0.053718 | FALSE | 1.538207 | FALSE | Photoreceptor          |
| TTAGGGT( db/db1  | db/db | 1226 | 0.051646 | FALSE | 1.108591 | FALSE | Photoreceptor          |
| TTAGGGT( db/db1  | db/db | 1696 | 0.022059 | FALSE | 1.022923 | FALSE | Endothelia Capillary E |
| TTAGGGT( db/db1  | db/db | 2715 | 0.064568 | FALSE | 0.781344 | FALSE | Photoreceptor          |
| TTAGGGTI db/db1  | db/db | 3741 | 0.017758 | FALSE | 0.469705 | FALSE | Endothelia Capillary E |
| TTAGGGTI db/db1  | db/db | 2435 | 0.148377 | TRUE  | 2.310375 | FALSE |                        |
| TTAGTCTA db/db1  | db/db | 5163 | 0.020171 | FALSE | 0.914697 | FALSE | Endothelia Capillary E |
| TTAGTCTA db/db1  | db/db | 897  | 0.039671 | FALSE | 1.6887   | FALSE | Photoreceptor          |
| TTAGTCTG db/db1  | db/db | 5991 | 0.063221 | FALSE | 0.898659 | FALSE | Photoreceptor          |
| TTAGTCTI db/db1  | db/db | 6673 | 0.01981  | FALSE | 0.842158 | FALSE | Photoreceptor          |
| TTAGTCTI db/db1  | db/db | 5807 | 0.357022 | TRUE  | 1.065907 | FALSE |                        |
| TTAGTCTI db/db1  | db/db | 1046 | 0.055901 | FALSE | 1.476426 | FALSE | Photoreceptor          |
| TTATTGCA db/db1  | db/db | 631  | 0.051646 | FALSE | 3.832005 | FALSE | Endothelia Capillary E |
| TTATTGCA db/db1  | db/db | 2095 | 0.088776 | FALSE | 8.703031 | TRUE  |                        |
| TTATTGCC db/db1  | db/db | 731  | 0.034954 | FALSE | 0.669435 | FALSE | Muller cell            |
| TTATTGCC db/db1  | db/db | 3110 | 0.012814 | FALSE | 0.949166 | FALSE | Endothelia EC-C4       |
| TTATTGCC db/db1  | db/db | 739  | 0.063221 | FALSE | 0.545294 | FALSE | Photoreceptor          |
| TTATTGCG db/db1  | db/db | 589  | 0.08663  | FALSE | 1.418337 | FALSE | Photoreceptor          |
| TTATTGCG db/db1  | db/db | 1997 | 0.017758 | FALSE | 1.46017  | FALSE | Endothelia Capillary E |
| TTATTGCTI db/db1 | db/db | 2170 | 0.039671 | FALSE | 1.273943 | FALSE | Photoreceptor          |
| TTATTGCTI db/db1 | db/db | 886  | 0.036891 | FALSE | 1.555603 | FALSE | Muller cell            |
| TTATTGCTI db/db1 | db/db | 4045 | 0.028251 | FALSE | 0.905522 | FALSE | Endothelia EC-C4       |
| TTCAATCA db/db1  | db/db | 1069 | 0.053718 | FALSE | 1.586751 | FALSE | Endothelia Venous EC   |
| TTCAATCA db/db1  | db/db | 4099 | 0.029787 | FALSE | 1.145706 | FALSE | Photoreceptor          |
| TTCAATCC db/db1  | db/db | 4261 | 0.032546 | FALSE | 0.997085 | FALSE | Photoreceptor          |
| TTCAATCC db/db1  | db/db | 2194 | 0.009933 | FALSE | 1.351474 | FALSE | Endothelia EC-C4       |
| TTCAATCC db/db1  | db/db | 3906 | 0.033726 | FALSE | 1.141728 | FALSE | Photoreceptor          |
| TTCAATCG db/db1  | db/db | 1478 | 0.084562 | FALSE | 1.223491 | FALSE | Photoreceptor          |
| TTCAATCG db/db1  | db/db | 938  | 0.017114 | FALSE | 1.513877 | FALSE | Endothelia Capillary E |
| TTCAATCG db/db1  | db/db | 1839 | 0.018422 | FALSE | 1.203023 | FALSE | Endothelia EC-C4       |
| TTCAATCTI db/db1 | db/db | 2505 | 0.034954 | FALSE | 0.555738 | FALSE | Photoreceptor          |
| TTCAATCTI db/db1 | db/db | 707  | 0.059406 | FALSE | 3.327413 | FALSE | Photoreceptor          |
| TTCAATCTI db/db1 | db/db | 1428 | 0.013338 | FALSE | 1.230455 | FALSE | Endothelia Capillary E |
| TTCACCGA db/db1  | db/db | 1345 | 0.048732 | FALSE | 1.290443 | FALSE | Photoreceptor          |
| TTCACCGA db/db1  | db/db | 1005 | 0.080645 | FALSE | 1.233525 | FALSE | Photoreceptor          |

|                 |       |      |          |       |          |       |                         |
|-----------------|-------|------|----------|-------|----------|-------|-------------------------|
| TTCACCGC db/db1 | db/db | 577  | 0.037564 | FALSE | 2.433376 | FALSE | Muller cell             |
| TTCACCGC db/db1 | db/db | 5055 | 0.021669 | FALSE | 0.705153 | FALSE | Photoreceptor           |
| TTCACCGT db/db1 | db/db | 664  | 0.058205 | FALSE | 0.890527 | FALSE | Photoreceptor           |
| TTCACCGT db/db1 | db/db | 569  | 0.027273 | FALSE | 1.032517 | FALSE | Photoreceptor           |
| TTCACCGT db/db1 | db/db | 3739 | 0.059406 | FALSE | 0.779522 | FALSE | Endothelia Venous EC    |
| TTCACGCA db/db1 | db/db | 2884 | 0.068864 | FALSE | 1.723303 | FALSE | Photoreceptor           |
| TTCACGCA db/db1 | db/db | 6487 | 0.022059 | FALSE | 0.814347 | FALSE | Photoreceptor           |
| TTCACGCA db/db1 | db/db | 790  | 0.022455 | FALSE | 0.451627 | FALSE | Neuron                  |
| TTCACGCC db/db1 | db/db | 1462 | 0.011805 | FALSE | 1.414826 | FALSE | Endothelia Capillary EC |
| TTCACGCC db/db1 | db/db | 869  | 0.022455 | FALSE | 0.955106 | FALSE | Endothelia EC-C4        |
| TTCACGCT db/db1 | db/db | 448  | 0.028754 | FALSE | 2.911451 | FALSE | Muller cell             |
| TTCAGGA db/db1  | db/db | 1255 | 0.007058 | FALSE | 0.947525 | FALSE | Endothelia Capillary EC |
| TTCAGGA db/db1  | db/db | 1499 | 0.382671 | TRUE  | 2.659575 | FALSE |                         |
| TTCAGGA db/db1  | db/db | 2212 | 0.024971 | FALSE | 1.295036 | FALSE | Endothelia Aterial EC   |
| TTCAGGA db/db1  | db/db | 3923 | 0.036232 | FALSE | 0.732413 | FALSE | Photoreceptor           |
| TTCAGGA db/db1  | db/db | 1215 | 0.031411 | FALSE | 0.81836  | FALSE | Photoreceptor           |
| TTCAGGA db/db1  | db/db | 603  | 0.296296 | TRUE  | 8.813161 | TRUE  |                         |
| TTCAGGA db/db1  | db/db | 2245 | 0.015287 | FALSE | 1.174979 | FALSE | Endothelia EC-C4        |
| TTCAGGA db/db1  | db/db | 8120 | 0.015581 | FALSE | 0.351534 | FALSE | Photoreceptor           |
| TTCATGTA db/db1 | db/db | 846  | 0.008438 | FALSE | 1.772382 | FALSE | Endothelia Capillary EC |
| TTCATGTC db/db1 | db/db | 1071 | 0.445833 | TRUE  | 5.326152 | TRUE  |                         |
| TTCATGTC db/db1 | db/db | 6969 | 0.022059 | FALSE | 0.728945 | FALSE | Photoreceptor           |
| TTCATGTC db/db1 | db/db | 2346 | 0.026328 | FALSE | 0.951776 | FALSE | Endothelia Aterial EC   |
| TTCATGTG db/db1 | db/db | 712  | 0.098234 | FALSE | 1.661395 | FALSE | Photoreceptor           |
| TTCATGTT db/db1 | db/db | 2858 | 0.029266 | FALSE | 1.15941  | FALSE | Endothelia EC-C4        |
| TTCATGTT db/db1 | db/db | 1895 | 0.038251 | FALSE | 1.024758 | FALSE | Endothelia Venous EC    |
| TTCATGTT db/db1 | db/db | 3190 | 0.031973 | FALSE | 0.943664 | FALSE | Endothelia Capillary EC |
| TTCATTGC db/db1 | db/db | 4857 | 0.053718 | FALSE | 0.727008 | FALSE | Photoreceptor           |
| TTCATTGC db/db1 | db/db | 810  | 0.037564 | FALSE | 1.034787 | FALSE | Photoreceptor           |
| TTCATTGC db/db1 | db/db | 418  | 0.018761 | FALSE | 0.623062 | FALSE | Photoreceptor           |
| TTCATTGC db/db1 | db/db | 4706 | 0.027273 | FALSE | 0.626545 | FALSE | Photoreceptor           |
| TTCATTGG db/db1 | db/db | 6310 | 0.119124 | TRUE  | 1.567672 | FALSE |                         |
| TTCATTGG db/db1 | db/db | 730  | 0.122388 | TRUE  | 4.375    | FALSE |                         |
| TTCATTGG db/db1 | db/db | 2139 | 0.019455 | FALSE | 0.600477 | FALSE | Photoreceptor           |
| TTCATTGT db/db1 | db/db | 663  | 0.076994 | FALSE | 1.991131 | FALSE | Photoreceptor           |
| TTCATTGT db/db1 | db/db | 430  | 0.15354  | TRUE  | 6.299213 | TRUE  |                         |
| TTCATTGT db/db1 | db/db | 1394 | 0.054795 | FALSE | 6.773774 | TRUE  |                         |
| TTCCAATA db/db1 | db/db | 2615 | 0.013074 | FALSE | 0.500213 | FALSE | Photoreceptor           |
| TTCCAATA db/db1 | db/db | 1800 | 0.012557 | FALSE | 1.412946 | FALSE | Pericyte                |
| TTCCAATC db/db1 | db/db | 2472 | 0.060641 | FALSE | 1.006981 | FALSE | Endothelia EC-C4        |
| TTCCAATC db/db1 | db/db | 4611 | 0.028251 | FALSE | 0.815344 | FALSE | Photoreceptor           |
| TTCCAATC db/db1 | db/db | 3043 | 0.037564 | FALSE | 1.000953 | FALSE | Photoreceptor           |
| TTCCAATG db/db1 | db/db | 2114 | 0.108718 | TRUE  | 1.251167 | FALSE |                         |
| TTCCAATT db/db1 | db/db | 391  | 0.015287 | FALSE | 2.61623  | FALSE | Photoreceptor           |
| TTCCAATT db/db1 | db/db | 560  | 0.052669 | FALSE | 1.555431 | FALSE | Endothelia Venous EC    |
| TTCCAATT db/db1 | db/db | 5665 | 0.017434 | FALSE | 0.656967 | FALSE | Photoreceptor           |
| TTCCACGA db/db1 | db/db | 7253 | 0.019455 | FALSE | 0.620035 | FALSE | Photoreceptor           |

|                 |       |      |          |       |          |       |                        |
|-----------------|-------|------|----------|-------|----------|-------|------------------------|
| TTCCACGC db/db1 | db/db | 1259 | 0.036232 | FALSE | 0.645044 | FALSE | Photoreceptor          |
| TTCCACGC db/db1 | db/db | 2190 | 0.01981  | FALSE | 0.970222 | FALSE | Endothelia Capillary E |
| TTCCACGC db/db1 | db/db | 1439 | 0.071958 | FALSE | 11.87964 | TRUE  |                        |
| TTCCACGC db/db1 | db/db | 1712 | 0.020536 | FALSE | 0.462323 | FALSE | Photoreceptor          |
| TTCCACGC db/db1 | db/db | 954  | 0.038251 | FALSE | 1.435861 | FALSE | Photoreceptor          |
| TTCCACGT db/db1 | db/db | 2461 | 0.013074 | FALSE | 1.286828 | FALSE | Endothelia Capillary E |
| TTCCACGT db/db1 | db/db | 2858 | 0.013876 | FALSE | 0.90065  | FALSE | Photoreceptor          |
| TTCCGGTA db/db1 | db/db | 580  | 0.063221 | FALSE | 1.33727  | FALSE | Photoreceptor          |
| TTCCGGTA db/db1 | db/db | 1387 | 0.016488 | FALSE | 0.626522 | FALSE | Photoreceptor          |
| TTCCGGTA db/db1 | db/db | 1539 | 0.026328 | FALSE | 1.072497 | FALSE | Endothelia Capillary E |
| TTCCGGTA db/db1 | db/db | 1387 | 0.024105 | FALSE | 1.251809 | FALSE | Endothelia Capillary E |
| TTCCGGTC db/db1 | db/db | 2017 | 0.020171 | FALSE | 1.479866 | FALSE | Endothelia Venous EC   |
| TTCCGGTC db/db1 | db/db | 6044 | 0.164835 | TRUE  | 2.061894 | FALSE |                        |
| TTCCGGTC db/db1 | db/db | 1892 | 0.128582 | TRUE  | 1.591414 | FALSE |                        |
| TTCCGGTC db/db1 | db/db | 4205 | 0.046025 | FALSE | 0.931043 | FALSE | Endothelia EC-C4       |
| TTCCGGTT db/db1 | db/db | 494  | 0.052669 | FALSE | 1.197849 | FALSE | Photoreceptor          |
| TTCCGGTT db/db1 | db/db | 3451 | 0.009063 | FALSE | 1.570846 | FALSE | Photoreceptor          |
| TTCCGGTT db/db1 | db/db | 703  | 0.03313  | FALSE | 2.12606  | FALSE | Muller cell            |
| TTCCGTGA db/db1 | db/db | 2702 | 0.031973 | FALSE | 1.19635  | FALSE | Photoreceptor          |
| TTCCGTGC db/db1 | db/db | 2900 | 0.019455 | FALSE | 0.634864 | FALSE | Photoreceptor          |
| TTCCGTGC db/db1 | db/db | 2927 | 0.012557 | FALSE | 0.88355  | FALSE | Endothelia Capillary E |
| TTCCGTGC db/db1 | db/db | 1674 | 0.026796 | FALSE | 2.670994 | FALSE | Muller cell            |
| TTCCGTGC db/db1 | db/db | 842  | 0.024534 | FALSE | 1.759129 | FALSE | Endothelia Capillary E |
| TTCCGTGC db/db1 | db/db | 1058 | 0.164835 | TRUE  | 7.398976 | TRUE  |                        |
| TTCCGTGT db/db1 | db/db | 740  | 0.013338 | FALSE | 1.94349  | FALSE | Endothelia Capillary E |
| TTCCTAAA db/db1 | db/db | 2654 | 0.04192  | FALSE | 1.325025 | FALSE | Photoreceptor          |
| TTCCTAAC db/db1 | db/db | 7292 | 0.026328 | FALSE | 0.639353 | FALSE | Photoreceptor          |
| TTCCTAAC db/db1 | db/db | 2182 | 0.15354  | TRUE  | 4.587156 | FALSE |                        |
| TTCCTAAC db/db1 | db/db | 3319 | 0.065957 | FALSE | 1.18153  | FALSE | Neuron                 |
| TTCCTAAC db/db1 | db/db | 630  | 0.018761 | FALSE | 1.43398  | FALSE | Endothelia Capillary E |
| TTCCTAAC db/db1 | db/db | 5611 | 0.029787 | FALSE | 0.803326 | FALSE | Photoreceptor          |
| TTCCTAAG db/db1 | db/db | 477  | 0.036891 | FALSE | 1.87203  | FALSE | Endothelia Capillary E |
| TTCCTAAG db/db1 | db/db | 875  | 0.031411 | FALSE | 1.154577 | FALSE | Photoreceptor          |
| TTCCTAAT db/db1 | db/db | 5265 | 0.091004 | FALSE | 0.730413 | FALSE | Photoreceptor          |
| TTCCTAAT db/db1 | db/db | 1885 | 0.042704 | FALSE | 0.738965 | FALSE | Photoreceptor          |
| TTCCTCTA db/db1 | db/db | 2113 | 0.029266 | FALSE | 1.203077 | FALSE | Photoreceptor          |
| TTCCTCTC db/db1 | db/db | 2599 | 0.137569 | TRUE  | 3.824579 | FALSE |                        |
| TTCCTCTC db/db1 | db/db | 618  | 0.029266 | FALSE | 1.197106 | FALSE | Muller cell            |
| TTCCTCTC db/db1 | db/db | 2244 | 0.10565  | TRUE  | 1.365837 | FALSE |                        |
| TTCCTCTC db/db1 | db/db | 3853 | 0.030318 | FALSE | 0.985332 | FALSE | Photoreceptor          |
| TTCCTCTC db/db1 | db/db | 1841 | 0.073582 | FALSE | 1.125274 | FALSE | Photoreceptor          |
| TTCCTCTC db/db1 | db/db | 496  | 0.122691 | TRUE  | 2.578797 | FALSE |                        |
| TTCCTCTC db/db1 | db/db | 1178 | 0.046906 | FALSE | 1.281283 | FALSE | Photoreceptor          |
| TTCCTCTG db/db1 | db/db | 5084 | 0.139562 | TRUE  | 1.331372 | FALSE |                        |
| TTCCTCTG db/db1 | db/db | 3832 | 0.031411 | FALSE | 0.862346 | FALSE | Endothelia Capillary E |
| TTCCTCTG db/db1 | db/db | 1728 | 0.020536 | FALSE | 1.177225 | FALSE | Endothelia Aterial EC  |
| TTCCTCTT db/db1 | db/db | 421  | 0.029787 | FALSE | 0.455545 | FALSE | Photoreceptor          |

|                 |       |      |          |       |          |       |                        |
|-----------------|-------|------|----------|-------|----------|-------|------------------------|
| TTCCTCTT db/db1 | db/db | 1809 | 0.053718 | FALSE | 1.329659 | FALSE | Endothelia Capillary E |
| TTCCTTCA db/db1 | db/db | 1051 | 0.015287 | FALSE | 1.158901 | FALSE | Endothelia Capillary E |
| TTCCTTCA db/db1 | db/db | 1931 | 0.013074 | FALSE | 1.370209 | FALSE | Endothelia Capillary E |
| TTCCTTCG db/db1 | db/db | 1280 | 0.01981  | FALSE | 0.984652 | FALSE | Neuron                 |
| TTCCTTCG db/db1 | db/db | 408  | 0.020908 | FALSE | 3.065255 | FALSE | Muller cell            |
| TTCCTTCG db/db1 | db/db | 5602 | 0.025868 | FALSE | 0.52853  | FALSE | Photoreceptor          |
| TTCCTTCG db/db1 | db/db | 3040 | 0.038251 | FALSE | 0.772959 | FALSE | Photoreceptor          |
| TTCCTTCT db/db1 | db/db | 1049 | 0.011805 | FALSE | 1.220193 | FALSE | Endothelia Capillary E |
| TTCGATTA db/db1 | db/db | 5249 | 0.023266 | FALSE | 0.662719 | FALSE | Photoreceptor          |
| TTCGATTA db/db1 | db/db | 8384 | 0.014151 | FALSE | 0.54271  | FALSE | Photoreceptor          |
| TTCGATTC db/db1 | db/db | 7159 | 0.029787 | FALSE | 0.49229  | FALSE | Photoreceptor          |
| TTCGATTC db/db1 | db/db | 1015 | 0.046025 | FALSE | 1.377467 | FALSE | Photoreceptor          |
| TTCGATTC db/db1 | db/db | 1644 | 0.010846 | FALSE | 1.048219 | FALSE | Endothelia Capillary E |
| TTCGATTC db/db1 | db/db | 420  | 0.020908 | FALSE | 3.235812 | FALSE | Photoreceptor          |
| TTCGATTC db/db1 | db/db | 2516 | 0.039671 | FALSE | 0.84356  | FALSE | Photoreceptor          |
| TTCGATTG db/db1 | db/db | 523  | 0.013338 | FALSE | 1.221436 | FALSE | Endothelia Capillary E |
| TTCGATTT db/db1 | db/db | 3085 | 0.024971 | FALSE | 0.88077  | FALSE | Endothelia Venous EC   |
| TTCGCTGC db/db1 | db/db | 2596 | 0.045165 | FALSE | 1.001539 | FALSE | Endothelia Venous EC   |
| TTCGCTGC db/db1 | db/db | 1130 | 0.126437 | TRUE  | 0.925355 | FALSE |                        |
| TTCGCTGT db/db1 | db/db | 3217 | 0.150727 | TRUE  | 1.185526 | FALSE |                        |
| TTCGCTGT db/db1 | db/db | 634  | 0.038953 | FALSE | 1.996156 | FALSE | Endothelia Aterial EC  |
| TTCGCTGT db/db1 | db/db | 2701 | 0.058205 | FALSE | 1.109564 | FALSE | Photoreceptor          |
| TTCGCTGT db/db1 | db/db | 2608 | 0.043505 | FALSE | 1.156655 | FALSE | Photoreceptor          |
| TTCGGTCA db/db1 | db/db | 1949 | 0.020908 | FALSE | 1.036202 | FALSE | Endothelia Aterial EC  |
| TTCGGTCC db/db1 | db/db | 1826 | 0.029787 | FALSE | 1.440203 | FALSE | Pericyte               |
| TTCGGTCC db/db1 | db/db | 1158 | 0.052669 | FALSE | 1.468573 | FALSE | Endothelia EC-C4       |
| TTCGGTCC db/db1 | db/db | 2590 | 0.016799 | FALSE | 0.854313 | FALSE | Endothelia Capillary E |
| TTCGGTCC db/db1 | db/db | 1872 | 0.053718 | FALSE | 1.076092 | FALSE | Photoreceptor          |
| TTCGGTCC db/db1 | db/db | 4130 | 0.023266 | FALSE | 0.586025 | FALSE | Photoreceptor          |
| TTCGGTCT db/db1 | db/db | 558  | 0.068864 | FALSE | 2.251551 | FALSE | Photoreceptor          |
| TTCGGTCT db/db1 | db/db | 2155 | 0.018761 | FALSE | 0.933194 | FALSE | Endothelia EC-C4       |
| TTCGGTCT db/db1 | db/db | 1389 | 0.034954 | FALSE | 1.794271 | FALSE | Pericyte               |
| TTCGGTCT db/db1 | db/db | 1426 | 0.004436 | FALSE | 1.174821 | FALSE | Pericyte               |
| TTCTAACC db/db1 | db/db | 433  | 0.071958 | FALSE | 3.360607 | FALSE | Muller cell            |
| TTCTAACG db/db1 | db/db | 3802 | 0.045165 | FALSE | 0.710062 | FALSE | Photoreceptor          |
| TTCTAACG db/db1 | db/db | 4080 | 0.029266 | FALSE | 0.725529 | FALSE | Photoreceptor          |
| TTCTAACT db/db1 | db/db | 1816 | 0.046906 | FALSE | 1.242336 | FALSE | Endothelia Venous EC   |
| TTCTAACT db/db1 | db/db | 2470 | 0.038953 | FALSE | 0.981578 | FALSE | Microglia              |
| TTCTAACT db/db1 | db/db | 632  | 0.019455 | FALSE | 1.243455 | FALSE | Endothelia Capillary E |
| TTCTAGTA db/db1 | db/db | 802  | 0.357022 | TRUE  | 1.815039 | FALSE |                        |
| TTCTAGTA db/db1 | db/db | 666  | 0.060641 | FALSE | 1.138924 | FALSE | Photoreceptor          |
| TTCTAGTA db/db1 | db/db | 3943 | 0.019455 | FALSE | 0.476399 | FALSE | Photoreceptor          |
| TTCTAGTC db/db1 | db/db | 1394 | 0.025416 | FALSE | 1.294109 | FALSE | Endothelia Capillary E |
| TTCTAGTC db/db1 | db/db | 3723 | 0.013876 | FALSE | 0.859742 | FALSE | Endothelia Capillary E |
| TTCTAGTG db/db1 | db/db | 1579 | 0.016799 | FALSE | 1.114319 | FALSE | Endothelia EC-C4       |
| TTCTAGTG db/db1 | db/db | 2608 | 0.209157 | TRUE  | 3.714232 | FALSE |                        |
| TTCTAGTT db/db1 | db/db | 1914 | 0.143501 | TRUE  | 5.689703 | TRUE  |                        |

|                 |       |      |          |       |          |       |                        |
|-----------------|-------|------|----------|-------|----------|-------|------------------------|
| TTCTAGTT db/db1 | db/db | 6230 | 0.020536 | FALSE | 0.624748 | FALSE | Photoreceptor          |
| TTCTAGTT db/db1 | db/db | 903  | 0.032546 | FALSE | 0.808103 | FALSE | Photoreceptor          |
| TTCTAGTT db/db1 | db/db | 1065 | 0.059406 | FALSE | 1.663124 | FALSE | Muller cell            |
| TTCTCTCA db/db1 | db/db | 846  | 0.046906 | FALSE | 1.071153 | FALSE | Photoreceptor          |
| TTCTCTCC db/db1 | db/db | 699  | 0.014429 | FALSE | 1.390335 | FALSE | Endothelia Aterial EC  |
| TTCTCTCG db/db1 | db/db | 598  | 0.020536 | FALSE | 0.927345 | FALSE | Photoreceptor          |
| TTCTCTCT db/db1 | db/db | 7576 | 0.028251 | FALSE | 0.250492 | FALSE | Photoreceptor          |
| TTCTCTCT db/db1 | db/db | 1934 | 0.042704 | FALSE | 1.436049 | FALSE | Photoreceptor          |
| TTCTCTCT db/db1 | db/db | 1017 | 0.03313  | FALSE | 2.00626  | FALSE | Endothelia Aterial EC  |
| TTCTCTCT db/db1 | db/db | 2337 | 0.014429 | FALSE | 1.032033 | FALSE | Endothelia Venous EC   |
| TTCTGTAA db/db1 | db/db | 6229 | 0.021669 | FALSE | 0.600393 | FALSE | Photoreceptor          |
| TTCTGTAA db/db1 | db/db | 1014 | 0.061912 | FALSE | 1.697134 | FALSE | Photoreceptor          |
| TTCTGTAA db/db1 | db/db | 2207 | 0.067388 | FALSE | 1.092917 | FALSE | Endothelia Capillary E |
| TTCTGTAA db/db1 | db/db | 2045 | 0.016799 | FALSE | 0.684622 | FALSE | Photoreceptor          |
| TTCTGTAA db/db1 | db/db | 940  | 0.082569 | FALSE | 9.963899 | TRUE  |                        |
| TTCTGTAC db/db1 | db/db | 3687 | 0.021286 | FALSE | 0.639319 | FALSE | Photoreceptor          |
| TTCTGTAC db/db1 | db/db | 1316 | 0.022857 | FALSE | 1.335224 | FALSE | Endothelia Capillary E |
| TTCTGTAC db/db1 | db/db | 1399 | 0.014429 | FALSE | 0.968693 | FALSE | Endothelia Capillary E |
| TTCTGTAC db/db1 | db/db | 1553 | 0.088776 | FALSE | 0.924311 | FALSE | Photoreceptor          |
| TTCTGTAT db/db1 | db/db | 742  | 0.045165 | FALSE | 1.28057  | FALSE | Photoreceptor          |
| TTCTGTAT db/db1 | db/db | 2410 | 0.012052 | FALSE | 0.991696 | FALSE | Endothelia Capillary E |
| TTCTGTAT db/db1 | db/db | 3769 | 0.200401 | TRUE  | 2.482201 | FALSE |                        |
| TTCTTCCC db/db1 | db/db | 547  | 0.045165 | FALSE | 1.23889  | FALSE | Photoreceptor          |
| TTCTTCCC db/db1 | db/db | 700  | 0.022059 | FALSE | 3.002464 | FALSE | Endothelia Capillary E |
| TTCTTCCG db/db1 | db/db | 2543 | 0.109375 | TRUE  | 3.59902  | FALSE |                        |
| TTCTTCCG db/db1 | db/db | 1508 | 0.025868 | FALSE | 1.390222 | FALSE | Endothelia Capillary E |
| TTCTTCCG db/db1 | db/db | 2885 | 0.031973 | FALSE | 0.90675  | FALSE | Photoreceptor          |
| TTCTTCCT db/db1 | db/db | 1159 | 0.017114 | FALSE | 0.265245 | FALSE | Photoreceptor          |
| TTCTTCCT db/db1 | db/db | 4631 | 0.031411 | FALSE | 0.919994 | FALSE | Endothelia EC-C4       |
| TTCTTCCT db/db1 | db/db | 2491 | 0.102807 | TRUE  | 0.841189 | FALSE |                        |
| TTCTTCCT db/db1 | db/db | 1821 | 0.024971 | FALSE | 1.500817 | FALSE | Neuron                 |
| TTCTTGAA db/db1 | db/db | 907  | 0.043505 | FALSE | 3.128912 | FALSE | Muller cell            |
| TTCTTGAA db/db1 | db/db | 2630 | 0.017114 | FALSE | 0.861129 | FALSE | Photoreceptor          |
| TTCTTGAA db/db1 | db/db | 2042 | 0.015287 | FALSE | 1.099814 | FALSE | Endothelia EC-C4       |
| TTCTTGAC db/db1 | db/db | 4043 | 0.029266 | FALSE | 0.608437 | FALSE | Photoreceptor          |
| TTCTTGAC db/db1 | db/db | 4922 | 0.064568 | FALSE | 0.797554 | FALSE | Endothelia Venous EC   |
| TTCTTGAC db/db1 | db/db | 803  | 0.036232 | FALSE | 1.83553  | FALSE | Photoreceptor          |
| TTCTTGAC db/db1 | db/db | 5069 | 0.024105 | FALSE | 0.684816 | FALSE | Photoreceptor          |
| TTCTTGAG db/db1 | db/db | 5406 | 0.13452  | TRUE  | 1.555457 | FALSE |                        |
| TTCTTGAG db/db1 | db/db | 1810 | 0.016181 | FALSE | 1.170636 | FALSE | Endothelia Capillary E |
| TTCTTGAG db/db1 | db/db | 758  | 0.107546 | TRUE  | 0.915565 | FALSE |                        |
| TTCTTGAT db/db1 | db/db | 2261 | 0.027273 | FALSE | 0.790626 | FALSE | Pericyte               |
| TTCTTGAT db/db1 | db/db | 952  | 0.075259 | FALSE | 1.667282 | FALSE | Photoreceptor          |
| TTGAACG db/db1  | db/db | 922  | 0.049679 | FALSE | 3.536418 | FALSE | Muller cell            |
| TTGAACG db/db1  | db/db | 7572 | 0.013074 | FALSE | 0.733317 | FALSE | Photoreceptor          |
| TTGAACG db/db1  | db/db | 1108 | 0.063221 | FALSE | 1.551028 | FALSE | Photoreceptor          |
| TTGAACG db/db1  | db/db | 973  | 0.040404 | FALSE | 1.536564 | FALSE | Photoreceptor          |

|                 |       |      |          |       |          |       |                        |
|-----------------|-------|------|----------|-------|----------|-------|------------------------|
| TTGAACGC db/db1 | db/db | 361  | 0.071958 | FALSE | 3.405901 | FALSE | Pericyte               |
| TTGAACGT db/db1 | db/db | 3096 | 0.021669 | FALSE | 0.961948 | FALSE | Endothelia EC-C4       |
| TTGAACGT db/db1 | db/db | 4573 | 0.024105 | FALSE | 0.761653 | FALSE | Photoreceptor          |
| TTGAACGT db/db1 | db/db | 2251 | 0.038251 | FALSE | 1.027687 | FALSE | Photoreceptor          |
| TTGACCCA db/db1 | db/db | 5256 | 0.043505 | FALSE | 0.923447 | FALSE | Photoreceptor          |
| TTGACCCC db/db1 | db/db | 594  | 0.032546 | FALSE | 0.465515 | FALSE | Photoreceptor          |
| TTGACCCC db/db1 | db/db | 1819 | 0.016799 | FALSE | 1.101448 | FALSE | Endothelia Venous EC   |
| TTGACCCC db/db1 | db/db | 656  | 0.033726 | FALSE | 0.427946 | FALSE | Neuron                 |
| TTGACCCC db/db1 | db/db | 2447 | 0.04192  | FALSE | 1.227593 | FALSE | Photoreceptor          |
| TTGACCCC db/db1 | db/db | 2047 | 0.063221 | FALSE | 1.441714 | FALSE | Photoreceptor          |
| TTGACCCT db/db1 | db/db | 5157 | 0.029266 | FALSE | 0.865402 | FALSE | Endothelia EC-C4       |
| TTGACCCT db/db1 | db/db | 1517 | 0.046906 | FALSE | 2.028944 | FALSE | Muller cell            |
| TTGACCCT db/db1 | db/db | 520  | 0.020171 | FALSE | 4.175894 | FALSE | Muller cell            |
| TTGAGTG/ db/db1 | db/db | 2707 | 0.019455 | FALSE | 1.205193 | FALSE | Endothelia Capillary E |
| TTGAGTGC db/db1 | db/db | 601  | 0.038953 | FALSE | 0.765126 | FALSE | Photoreceptor          |
| TTGAGTGC db/db1 | db/db | 581  | 0.034954 | FALSE | 0.876251 | FALSE | Photoreceptor          |
| TTGAGTGC db/db1 | db/db | 2042 | 0.021286 | FALSE | 1.210553 | FALSE | Endothelia Capillary E |
| TTGAGTGC db/db1 | db/db | 1832 | 0.057037 | FALSE | 1.169964 | FALSE | Photoreceptor          |
| TTGAGTGT db/db1 | db/db | 845  | 0.044326 | FALSE | 4.487931 | FALSE | Muller cell            |
| TTGAGTGT db/db1 | db/db | 577  | 0.023682 | FALSE | 0.6255   | FALSE | Photoreceptor          |
| TTGAGTGT db/db1 | db/db | 2135 | 0.084562 | FALSE | 1.232569 | FALSE | Photoreceptor          |
| TTGATGG/ db/db1 | db/db | 6506 | 0.159016 | TRUE  | 1.271971 | FALSE |                        |
| TTGATGG/ db/db1 | db/db | 689  | 0.059406 | FALSE | 0.814694 | FALSE | Photoreceptor          |
| TTGATGG/ db/db1 | db/db | 1310 | 0.070386 | FALSE | 1.525497 | FALSE | Photoreceptor          |
| TTGATGG/ db/db1 | db/db | 1159 | 0.009063 | FALSE | 1.429052 | FALSE | Endothelia Capillary E |
| TTGATGGC db/db1 | db/db | 3590 | 0.091004 | FALSE | 1.120782 | FALSE | Neuron                 |
| TTGATGGC db/db1 | db/db | 2462 | 0.025868 | FALSE | 1.049059 | FALSE | Endothelia Venous EC   |
| TTGATGGC db/db1 | db/db | 4209 | 0.018761 | FALSE | 1.125537 | FALSE | Photoreceptor          |
| TTGATGGC db/db1 | db/db | 7001 | 0.020908 | FALSE | 0.710055 | FALSE | Photoreceptor          |
| TTGATGGT db/db1 | db/db | 1289 | 0.098234 | FALSE | 2.003508 | FALSE | Muller cell            |
| TTGATGGT db/db1 | db/db | 1232 | 0.020908 | FALSE | 0.903266 | FALSE | Photoreceptor          |
| TTGCATTA db/db1 | db/db | 1504 | 0.052669 | FALSE | 1.130145 | FALSE | Photoreceptor          |
| TTGCATTA db/db1 | db/db | 1066 | 0.04192  | FALSE | 1.768482 | FALSE | Endothelia Venous EC   |
| TTGCATTA db/db1 | db/db | 2833 | 0.024971 | FALSE | 1.044741 | FALSE | Endothelia Capillary E |
| TTGCATTA db/db1 | db/db | 1887 | 0.047807 | FALSE | 1.052574 | FALSE | Photoreceptor          |
| TTGCATTG db/db1 | db/db | 977  | 0.051646 | FALSE | 0.31242  | FALSE | Photoreceptor          |
| TTGCATTT db/db1 | db/db | 3898 | 0.013074 | FALSE | 0.389331 | FALSE | Photoreceptor          |
| TTGCCTGA db/db1 | db/db | 760  | 0.053718 | FALSE | 0.718908 | FALSE | Photoreceptor          |
| TTGCCTGA db/db1 | db/db | 995  | 0.054795 | FALSE | 1.434128 | FALSE | Endothelia Capillary E |
| TTGCCTGA db/db1 | db/db | 423  | 0.076994 | FALSE | 2.540481 | FALSE | Endothelia Capillary E |
| TTGCCTGA db/db1 | db/db | 1241 | 0.485327 | TRUE  | 2.63558  | FALSE |                        |
| TTGCCTGA db/db1 | db/db | 2883 | 0.048732 | FALSE | 0.919497 | FALSE | Photoreceptor          |
| TTGCCTGC db/db1 | db/db | 2573 | 0.135645 | TRUE  | 2.990948 | FALSE |                        |
| TTGCCTGC db/db1 | db/db | 606  | 0.218615 | TRUE  | 2.673147 | FALSE |                        |
| TTGCCTGC db/db1 | db/db | 3955 | 0.025416 | FALSE | 0.642964 | FALSE | Endothelia EC-C4       |
| TTGCCTGC db/db1 | db/db | 3898 | 0.076994 | FALSE | 0.88095  | FALSE | Endothelia Venous EC   |
| TTGCCTGC db/db1 | db/db | 7180 | 0.103567 | TRUE  | 1.905388 | FALSE |                        |

|                 |       |      |          |       |          |       |                        |
|-----------------|-------|------|----------|-------|----------|-------|------------------------|
| TTGCCTGC db/db1 | db/db | 3098 | 0.013876 | FALSE | 0.28955  | FALSE | Photoreceptor          |
| TTGCCTGC db/db1 | db/db | 1668 | 0.046025 | FALSE | 1.180418 | FALSE | Endothelia Venous EC   |
| TTGCCTGC db/db1 | db/db | 7485 | 0.334395 | TRUE  | 0.905458 | FALSE |                        |
| TTGCCTGT db/db1 | db/db | 817  | 0.019106 | FALSE | 0.340501 | FALSE | Photoreceptor          |
| TTGCCTGT db/db1 | db/db | 1716 | 0.041154 | FALSE | 0.784597 | FALSE | Photoreceptor          |
| TTGCGTCC db/db1 | db/db | 775  | 0.031411 | FALSE | 1.751301 | FALSE | Photoreceptor          |
| TTGCGTCC db/db1 | db/db | 773  | 0.011081 | FALSE | 1.355689 | FALSE | Endothelia Capillary E |
| TTGCGTCC db/db1 | db/db | 1886 | 0.026328 | FALSE | 1.15331  | FALSE | Endothelia Venous EC   |
| TTGCGTCT db/db1 | db/db | 1208 | 0.015879 | FALSE | 0.601402 | FALSE | Endothelia Aterial EC  |
| TTGCGTCT db/db1 | db/db | 583  | 0.058205 | FALSE | 2.017861 | FALSE | Muller cell            |
| TTGCTGCA db/db1 | db/db | 1171 | 0.036891 | FALSE | 1.311846 | FALSE | Endothelia Capillary E |
| TTGCTGCA db/db1 | db/db | 468  | 0.044326 | FALSE | 2.227737 | FALSE | Muller cell            |
| TTGCTGCA db/db1 | db/db | 2067 | 0.018088 | FALSE | 0.959638 | FALSE | Photoreceptor          |
| TTGCTGCC db/db1 | db/db | 2313 | 0.055901 | FALSE | 0.970084 | FALSE | Endothelia Capillary E |
| TTGCTGCC db/db1 | db/db | 1795 | 0.14163  | TRUE  | 2.880658 | FALSE |                        |
| TTGCTGCC db/db1 | db/db | 1630 | 0.107669 | TRUE  | 1.198692 | FALSE |                        |
| TTGCTGCT db/db1 | db/db | 743  | 0.058205 | FALSE | 1.269758 | FALSE | Endothelia Capillary E |
| TTGCTGCT db/db1 | db/db | 3423 | 0.022857 | FALSE | 0.736885 | FALSE | Photoreceptor          |
| TTGCTGCT db/db1 | db/db | 3953 | 0.026328 | FALSE | 0.771597 | FALSE | Endothelia Venous EC   |
| TTGCTGCT db/db1 | db/db | 2227 | 0.027273 | FALSE | 0.578736 | FALSE | Photoreceptor          |
| TTGGATG/ db/db1 | db/db | 1006 | 0.04192  | FALSE | 2.6014   | FALSE | Muller cell            |
| TTGGATG/ db/db1 | db/db | 1443 | 0.013876 | FALSE | 1.213911 | FALSE | Endothelia Capillary E |
| TTGGATG( db/db1 | db/db | 438  | 0.073582 | FALSE | 3.85767  | FALSE | Muller cell            |
| TTGGATG( db/db1 | db/db | 3663 | 0.025416 | FALSE | 0.841389 | FALSE | Photoreceptor          |
| TTGGATG( db/db1 | db/db | 4475 | 0.015879 | FALSE | 0.828164 | FALSE | Endothelia EC-C4       |
| TTGGATG( db/db1 | db/db | 1441 | 0.042704 | FALSE | 1.694814 | FALSE | Photoreceptor          |
| TTGGATG( db/db1 | db/db | 1177 | 0.023266 | FALSE | 0.389623 | FALSE | Photoreceptor          |
| TTGGATG( db/db1 | db/db | 1505 | 0.012814 | FALSE | 0.618533 | FALSE | Photoreceptor          |
| TTGGATG1 db/db1 | db/db | 1046 | 0.061912 | FALSE | 0.603373 | FALSE | Photoreceptor          |
| TTGGATG1 db/db1 | db/db | 1127 | 0.046906 | FALSE | 1.600205 | FALSE | Photoreceptor          |
| TTGGGAT/ db/db1 | db/db | 4450 | 0.022857 | FALSE | 0.841213 | FALSE | Endothelia Capillary E |
| TTGGGAT( db/db1 | db/db | 6019 | 0.043505 | FALSE | 0.978051 | FALSE | Photoreceptor          |
| TTGGGAT( db/db1 | db/db | 3493 | 0.018761 | FALSE | 0.538762 | FALSE | Photoreceptor          |
| TTGGGAT( db/db1 | db/db | 1351 | 0.012303 | FALSE | 1.325576 | FALSE | Endothelia Capillary E |
| TTGGGAT( db/db1 | db/db | 402  | 0.08663  | FALSE | 12.85714 | TRUE  |                        |
| TTGGGAT( db/db1 | db/db | 6308 | 0.015287 | FALSE | 0.681896 | FALSE | Photoreceptor          |
| TTGGGAT( db/db1 | db/db | 1262 | 0.076994 | FALSE | 1.056828 | FALSE | Photoreceptor          |
| TTGGGAT1 db/db1 | db/db | 4853 | 0.098234 | FALSE | 0.912216 | FALSE | Endothelia Venous EC   |
| TTGGGAT1 db/db1 | db/db | 865  | 0.004927 | FALSE | 1.535078 | FALSE | Pericyte               |
| TTGGGCG/ db/db1 | db/db | 562  | 0.041154 | FALSE | 1.294499 | FALSE | Photoreceptor          |
| TTGGGCG( db/db1 | db/db | 464  | 0.024105 | FALSE | 2.083126 | FALSE | Photoreceptor          |
| TTGGGCG( db/db1 | db/db | 776  | 0.038953 | FALSE | 1.743661 | FALSE | Photoreceptor          |
| TTGGGCG( db/db1 | db/db | 2443 | 0.030318 | FALSE | 0.840824 | FALSE | Photoreceptor          |
| TTGGGCG( db/db1 | db/db | 5512 | 0.119124 | TRUE  | 1.953009 | FALSE |                        |
| TTGGGCG( db/db1 | db/db | 1642 | 0.028754 | FALSE | 1.07296  | FALSE | Endothelia EC-C4       |
| TTGGGCG( db/db1 | db/db | 4993 | 0.03313  | FALSE | 0.996572 | FALSE | Endothelia Venous EC   |
| TTGGGCG( db/db1 | db/db | 1907 | 0.103567 | TRUE  | 8.061749 | TRUE  |                        |



|                  |       |      |          |       |          |       |                        |
|------------------|-------|------|----------|-------|----------|-------|------------------------|
| TTGGGCG↓ db/db1  | db/db | 2005 | 0.091004 | FALSE | 1.598732 | FALSE | Endothelia EC-C4       |
| TTGGGCG↓ db/db1  | db/db | 2235 | 0.073582 | FALSE | 0.995378 | FALSE | Photoreceptor          |
| TTGGGCG↓ db/db1  | db/db | 656  | 0.038251 | FALSE | 0.508441 | FALSE | Photoreceptor          |
| TTGGGCG↓ db/db1  | db/db | 734  | 0.016799 | FALSE | 1.529797 | FALSE | Endothelia Aterial EC  |
| TTGGGCG↓ db/db1  | db/db | 680  | 0.052669 | FALSE | 2.003313 | FALSE | Photoreceptor          |
| TTGGGCG↓ db/db1  | db/db | 401  | 0.084562 | FALSE | 3.331346 | FALSE | Muller cell            |
| TTGGGTAC↓ db/db1 | db/db | 5280 | 0.011081 | FALSE | 0.390101 | FALSE | Photoreceptor          |
| TTGGGTAC db/db1  | db/db | 2462 | 0.014997 | FALSE | 1.026997 | FALSE | Endothelia Capillary E |
| TTGGGTAC db/db1  | db/db | 7669 | 0.016181 | FALSE | 0.65276  | FALSE | Photoreceptor          |
| TTGGGTA↓ db/db1  | db/db | 1587 | 0.078788 | FALSE | 1.082378 | FALSE | Pericyte               |
| TTGGGTA↓ db/db1  | db/db | 3816 | 0.036891 | FALSE | 0.957115 | FALSE | Photoreceptor          |
| TTGGTTTA db/db1  | db/db | 1236 | 0.020171 | FALSE | 0.625003 | FALSE | Photoreceptor          |
| TTGGTTTC db/db1  | db/db | 5950 | 0.314286 | TRUE  | 1.643629 | FALSE |                        |
| TTGGTTTC db/db1  | db/db | 850  | 0.015287 | FALSE | 1.248314 | FALSE | Endothelia EC-C4       |
| TTGGTTTG db/db1  | db/db | 2525 | 0.022455 | FALSE | 1.097774 | FALSE | Endothelia Capillary E |
| TTGGTTTT db/db1  | db/db | 6962 | 0.019106 | FALSE | 0.60276  | FALSE | Photoreceptor          |
| TTGTGGA↓ db/db1  | db/db | 735  | 0.122388 | TRUE  | 4.571984 | FALSE |                        |
| TTGTGGA↓ db/db1  | db/db | 3342 | 0.047807 | FALSE | 1.022792 | FALSE | Microglia              |
| TTGTGGA↓ db/db1  | db/db | 8428 | 0.013338 | FALSE | 0.51053  | FALSE | Photoreceptor          |
| TTGTGGAC db/db1  | db/db | 382  | 0.073582 | FALSE | 0.936255 | FALSE | Photoreceptor          |
| TTGTGGA↓ db/db1  | db/db | 572  | 0.01981  | FALSE | 1.85095  | FALSE | Endothelia Capillary E |
| TTGTGGA↓ db/db1  | db/db | 1778 | 0.012303 | FALSE | 0.972115 | FALSE | Endothelia Aterial EC  |
| TTGTGTTA db/db1  | db/db | 1882 | 0.029787 | FALSE | 1.333288 | FALSE | Neuron                 |
| TTGTGTTA db/db1  | db/db | 8887 | 0.064568 | FALSE | 0.50099  | FALSE | Photoreceptor          |
| TTGTGTTC db/db1  | db/db | 1026 | 0.107669 | TRUE  | 2.902758 | FALSE |                        |
| TTGTGTTC db/db1  | db/db | 4654 | 0.035586 | FALSE | 0.595774 | FALSE | Photoreceptor          |
| TTGTGTTG db/db1  | db/db | 5037 | 0.014997 | FALSE | 0.83164  | FALSE | Photoreceptor          |
| TTGTGTTT db/db1  | db/db | 2565 | 0.091004 | FALSE | 0.975117 | FALSE | Photoreceptor          |
| TTGTTCAA db/db1  | db/db | 749  | 0.053718 | FALSE | 1.292017 | FALSE | Photoreceptor          |
| TTGTTCAA db/db1  | db/db | 875  | 0.044326 | FALSE | 1.741997 | FALSE | Photoreceptor          |
| TTGTTCAC db/db1  | db/db | 3884 | 0.031973 | FALSE | 0.951078 | FALSE | Endothelia Venous EC   |
| TTGTTCAC db/db1  | db/db | 891  | 0.103567 | TRUE  | 9.54142  | TRUE  |                        |
| TTGTTCAC db/db1  | db/db | 4348 | 0.067388 | FALSE | 0.952689 | FALSE | Endothelia Venous EC   |
| TTGTTCAC db/db1  | db/db | 2357 | 0.015879 | FALSE | 1.020454 | FALSE | Endothelia Capillary E |
| TTGTTCAG db/db1  | db/db | 4318 | 0.357022 | TRUE  | 2.271437 | FALSE |                        |
| TTGTTCAG db/db1  | db/db | 3647 | 0.064568 | FALSE | 0.926204 | FALSE | Photoreceptor          |
| TTGTTCAG db/db1  | db/db | 1939 | 0.023266 | FALSE | 1.148722 | FALSE | Endothelia Capillary E |
| TTGTTCAT↓ db/db1 | db/db | 2835 | 0.028251 | FALSE | 1.196631 | FALSE | Endothelia Venous EC   |
| TTGTTCAT↓ db/db1 | db/db | 1042 | 0.024534 | FALSE | 1.418055 | FALSE | Endothelia Capillary E |
| TTGTTGTA db/db1  | db/db | 6993 | 0.012052 | FALSE | 0.596517 | FALSE | Photoreceptor          |
| TTGTTGTA db/db1  | db/db | 1980 | 0.08663  | FALSE | 1.118861 | FALSE | Photoreceptor          |
| TTGTTGTC db/db1  | db/db | 706  | 0.028754 | FALSE | 0.310029 | FALSE | Photoreceptor          |
| TTGTTGTG db/db1  | db/db | 2793 | 0.035586 | FALSE | 0.864081 | FALSE | Endothelia EC-C4       |
| TTGTTGTT db/db1  | db/db | 2780 | 0.014429 | FALSE | 0.901323 | FALSE | Endothelia Capillary E |
| TTGTTTGA db/db1  | db/db | 1435 | 0.061912 | FALSE | 1.196545 | FALSE | Photoreceptor          |
| TTGTTTGC db/db1  | db/db | 1883 | 0.012303 | FALSE | 1.074097 | FALSE | Endothelia Capillary E |
| TTGTTTGC db/db1  | db/db | 843  | 0.098234 | FALSE | 2.211703 | FALSE | Endothelia Capillary E |

|                 |       |      |          |       |          |       |                        |
|-----------------|-------|------|----------|-------|----------|-------|------------------------|
| TTGTTTGC db/db1 | db/db | 4466 | 0.078788 | FALSE | 1.024364 | FALSE | Photoreceptor          |
| TTGTTTGT db/db1 | db/db | 844  | 0.049679 | FALSE | 1.739101 | FALSE | Photoreceptor          |
| TTTACCAC db/db1 | db/db | 3247 | 0.05065  | FALSE | 1.01424  | FALSE | Photoreceptor          |
| TTTACCAC db/db1 | db/db | 704  | 0.053718 | FALSE | 1.69159  | FALSE | Photoreceptor          |
| TTTACCAC db/db1 | db/db | 4885 | 0.018761 | FALSE | 0.619957 | FALSE | Photoreceptor          |
| TTTACCAG db/db1 | db/db | 2911 | 0.016181 | FALSE | 0.741523 | FALSE | Endothelia Venous EC   |
| TTTACCAG db/db1 | db/db | 2821 | 0.022059 | FALSE | 0.844582 | FALSE | Endothelia EC-C4       |
| TTTACCAG db/db1 | db/db | 752  | 0.091004 | FALSE | 1.455784 | FALSE | Muller cell            |
| TTTACCAG db/db1 | db/db | 4467 | 0.485327 | TRUE  | 2.435553 | FALSE |                        |
| TTTACCAT db/db1 | db/db | 5519 | 0.022455 | FALSE | 0.744751 | FALSE | Photoreceptor          |
| TTTACCAT db/db1 | db/db | 391  | 0.036891 | FALSE | 1.19784  | FALSE | Photoreceptor          |
| TTTACCAT db/db1 | db/db | 3483 | 0.015581 | FALSE | 0.910176 | FALSE | Endothelia Venous EC   |
| TTTACGTA db/db1 | db/db | 6662 | 0.027758 | FALSE | 0.632787 | FALSE | Photoreceptor          |
| TTTACGTC db/db1 | db/db | 4223 | 0.209157 | TRUE  | 2.187177 | FALSE |                        |
| TTTACGTG db/db1 | db/db | 3809 | 0.026796 | FALSE | 0.800437 | FALSE | Endothelia Venous EC   |
| TTTACGTG db/db1 | db/db | 4721 | 0.01981  | FALSE | 0.648027 | FALSE | Photoreceptor          |
| TTTACGTT db/db1 | db/db | 1752 | 0.021669 | FALSE | 1.170911 | FALSE | Endothelia Capillary E |
| TTTACGTT db/db1 | db/db | 1265 | 0.139562 | TRUE  | 1.06848  | FALSE |                        |
| TTTACGTT db/db1 | db/db | 756  | 0.004927 | FALSE | 1.674903 | FALSE | Endothelia Capillary E |
| TTTACTGA db/db1 | db/db | 1057 | 0.036891 | FALSE | 1.007927 | FALSE | Photoreceptor          |
| TTTACTGA db/db1 | db/db | 4749 | 0.019106 | FALSE | 0.768722 | FALSE | Endothelia EC-C4       |
| TTTACTGA db/db1 | db/db | 3020 | 0.024105 | FALSE | 1.070033 | FALSE | Photoreceptor          |
| TTTACTGC db/db1 | db/db | 5942 | 0.024105 | FALSE | 0.718698 | FALSE | Photoreceptor          |
| TTTACTGC db/db1 | db/db | 1593 | 0.023266 | FALSE | 0.868935 | FALSE | Photoreceptor          |
| TTTACTGC db/db1 | db/db | 1407 | 0.015287 | FALSE | 1.327032 | FALSE | Endothelia Aterial EC  |
| TTTACTGG db/db1 | db/db | 502  | 0.051646 | FALSE | 3.267739 | FALSE | Muller cell            |
| TTTACTGT db/db1 | db/db | 1004 | 0.061912 | FALSE | 1.690561 | FALSE | Photoreceptor          |
| TTTACTGT db/db1 | db/db | 2380 | 0.014429 | FALSE | 0.804621 | FALSE | Endothelia Venous EC   |
| TTTAGTCC db/db1 | db/db | 3825 | 0.042704 | FALSE | 0.822691 | FALSE | Endothelia EC-C4       |
| TTTAGTCC db/db1 | db/db | 788  | 0.028251 | FALSE | 2.361241 | FALSE | Photoreceptor          |
| TTTAGTCC db/db1 | db/db | 1114 | 0.13452  | TRUE  | 11.13024 | TRUE  |                        |
| TTTAGTCC db/db1 | db/db | 621  | 0.059406 | FALSE | 1.552769 | FALSE | Photoreceptor          |
| TTTAGTCG db/db1 | db/db | 3447 | 0.108718 | TRUE  | 0.541087 | FALSE |                        |
| TTTAGTCG db/db1 | db/db | 1821 | 0.075259 | FALSE | 1.530813 | FALSE | Neuron                 |
| TTTAGTCG db/db1 | db/db | 1348 | 0.045165 | FALSE | 0.655363 | FALSE | Photoreceptor          |
| TTTAGTCT db/db1 | db/db | 636  | 0.078788 | FALSE | 3.343256 | FALSE | Muller cell            |
| TTTAGTCT db/db1 | db/db | 3234 | 0.020536 | FALSE | 0.943268 | FALSE | Endothelia Capillary E |
| TTTAGTCT db/db1 | db/db | 1281 | 0.051646 | FALSE | 0.798671 | FALSE | Photoreceptor          |
| TTTAGTCT db/db1 | db/db | 992  | 0.020536 | FALSE | 1.467756 | FALSE | Endothelia Capillary E |
| TTTATGCA db/db1 | db/db | 1074 | 0.018422 | FALSE | 2.300868 | FALSE | Muller cell            |
| TTTATGCA db/db1 | db/db | 1866 | 0.104679 | TRUE  | 2.05     | FALSE |                        |
| TTTATGCA db/db1 | db/db | 2134 | 0.073582 | FALSE | 1.624104 | FALSE | Endothelia EC-C4       |
| TTTATGCC db/db1 | db/db | 3310 | 0.026328 | FALSE | 0.839695 | FALSE | Photoreceptor          |
| TTTATGCC db/db1 | db/db | 4382 | 0.04192  | FALSE | 0.561628 | FALSE | Endothelia EC-C4       |
| TTTATGCG db/db1 | db/db | 1520 | 0.060641 | FALSE | 1.25611  | FALSE | Photoreceptor          |
| TTTATGCT db/db1 | db/db | 2157 | 0.028754 | FALSE | 1.160641 | FALSE | Endothelia Capillary E |
| TTTATGCT db/db1 | db/db | 5065 | 0.24     | TRUE  | 1.651487 | FALSE |                        |

|          |        |       |      |          |       |          |       |                         |
|----------|--------|-------|------|----------|-------|----------|-------|-------------------------|
| TTTATGCT | db/db1 | db/db | 849  | 0.046906 | FALSE | 1.733224 | FALSE | Photoreceptor           |
| TTTATGCT | db/db1 | db/db | 3623 | 0.13452  | TRUE  | 6.816974 | TRUE  |                         |
| TTTATGCT | db/db1 | db/db | 434  | 0.022455 | FALSE | 0.218208 | FALSE | Photoreceptor           |
| TTTATGCT | db/db1 | db/db | 1474 | 0.029787 | FALSE | 0.989034 | FALSE | Pericyte                |
| TTTCACAA | db/db1 | db/db | 1062 | 0.114406 | TRUE  | 4.169221 | FALSE |                         |
| TTTCACAA | db/db1 | db/db | 3466 | 0.073582 | FALSE | 1.12169  | FALSE | Endothelia Venous EC    |
| TTTCACAC | db/db1 | db/db | 1394 | 0.028251 | FALSE | 1.252367 | FALSE | Photoreceptor           |
| TTTCACAC | db/db1 | db/db | 3161 | 0.014429 | FALSE | 0.765021 | FALSE | Endothelia Venous EC    |
| TTTCACAC | db/db1 | db/db | 582  | 0.005264 | FALSE | 2.433936 | FALSE | Pericyte                |
| TTTCACAT | db/db1 | db/db | 517  | 0.012814 | FALSE | 2.373444 | FALSE | Muller cell             |
| TTTCACAT | db/db1 | db/db | 3764 | 0.095727 | FALSE | 0.988399 | FALSE | Microglia               |
| TTTCAGTA | db/db1 | db/db | 9101 | 0.011561 | FALSE | 0.4197   | FALSE | Photoreceptor           |
| TTTCAGTA | db/db1 | db/db | 752  | 0.064568 | FALSE | 5.876393 | TRUE  |                         |
| TTTCAGTC | db/db1 | db/db | 2183 | 0.093319 | FALSE | 0.794775 | FALSE | Neuron                  |
| TTTCAGTC | db/db1 | db/db | 5478 | 0.021286 | FALSE | 0.671703 | FALSE | Photoreceptor           |
| TTTCAGTC | db/db1 | db/db | 8595 | 0.026796 | FALSE | 0.510964 | FALSE | Photoreceptor           |
| TTTCAGTG | db/db1 | db/db | 4707 | 0.021669 | FALSE | 0.357809 | FALSE | Photoreceptor           |
| TTTCAGTG | db/db1 | db/db | 2807 | 0.109375 | TRUE  | 5.082345 | TRUE  |                         |
| TTTCAGTG | db/db1 | db/db | 1100 | 0.024971 | FALSE | 1.869939 | FALSE | Photoreceptor           |
| TTTCAGTT | db/db1 | db/db | 2601 | 0.018761 | FALSE | 0.935161 | FALSE | Endothelia EC-C4        |
| TTTCATGA | db/db1 | db/db | 659  | 0.046906 | FALSE | 4.276927 | FALSE | Muller cell             |
| TTTCATGC | db/db1 | db/db | 4052 | 0.029787 | FALSE | 0.92913  | FALSE | Endothelia Capillary EC |
| TTTCATGC | db/db1 | db/db | 1115 | 0.034954 | FALSE | 1.848139 | FALSE | Endothelia Capillary EC |
| TTTCATGG | db/db1 | db/db | 447  | 0.034954 | FALSE | 2.905897 | FALSE | Neuron                  |
| TTTCATGG | db/db1 | db/db | 663  | 0.061912 | FALSE | 3.25777  | FALSE | Endothelia Aterial EC   |
| TTTCATGG | db/db1 | db/db | 514  | 0.012052 | FALSE | 3.314744 | FALSE | Photoreceptor           |
| TTTCATGT | db/db1 | db/db | 1388 | 0.047807 | FALSE | 0.519382 | FALSE | Photoreceptor           |
| TTTCATGT | db/db1 | db/db | 501  | 0.010614 | FALSE | 2.130426 | FALSE | Pericyte                |
| TTTCATGT | db/db1 | db/db | 885  | 0.024534 | FALSE | 0.57789  | FALSE | Photoreceptor           |
| TTTCATGT | db/db1 | db/db | 1986 | 0.013876 | FALSE | 1.060567 | FALSE | Endothelia EC-C4        |
| TTTCCTCC | db/db1 | db/db | 2779 | 0.012052 | FALSE | 0.989    | FALSE | Photoreceptor           |
| TTTCCTCG | db/db1 | db/db | 1295 | 0.014711 | FALSE | 1.539018 | FALSE | Endothelia Capillary EC |
| TTTCCTCT | db/db1 | db/db | 1579 | 0.13452  | TRUE  | 7.216495 | TRUE  |                         |
| TTTCGATC | db/db1 | db/db | 4956 | 0.024105 | FALSE | 0.589672 | FALSE | Endothelia EC-C4        |
| TTTCGATC | db/db1 | db/db | 3254 | 0.139562 | TRUE  | 4.712111 | FALSE |                         |
| TTTCGATC | db/db1 | db/db | 2064 | 0.064568 | FALSE | 1.404678 | FALSE | Endothelia Venous EC    |
| TTTCGATG | db/db1 | db/db | 522  | 0.103567 | TRUE  | 11.56915 | TRUE  |                         |
| TTTCGATT | db/db1 | db/db | 6097 | 0.028251 | FALSE | 0.677586 | FALSE | Photoreceptor           |
| TTTGACTA | db/db1 | db/db | 436  | 0.048732 | FALSE | 3.577112 | FALSE | Pericyte                |
| TTTGACTA | db/db1 | db/db | 1281 | 0.070386 | FALSE | 1.941532 | FALSE | Photoreceptor           |
| TTTGACTC | db/db1 | db/db | 763  | 0.05065  | FALSE | 1.812667 | FALSE | Photoreceptor           |
| TTTGACTC | db/db1 | db/db | 886  | 0.038251 | FALSE | 2.013619 | FALSE | Endothelia Capillary EC |
| TTTGACTC | db/db1 | db/db | 1416 | 0.010384 | FALSE | 0.479066 | FALSE | Photoreceptor           |
| TTTGACTC | db/db1 | db/db | 2090 | 0.025416 | FALSE | 0.7461   | FALSE | Photoreceptor           |
| TTTGACTG | db/db1 | db/db | 1762 | 0.103732 | TRUE  | 1.297112 | FALSE |                         |
| TTTGACTG | db/db1 | db/db | 1743 | 0.014151 | FALSE | 1.11154  | FALSE | Endothelia Aterial EC   |
| TTTGACTG | db/db1 | db/db | 1283 | 0.020908 | FALSE | 1.017759 | FALSE | Endothelia Capillary EC |

|           |        |       |      |          |       |          |       |                        |
|-----------|--------|-------|------|----------|-------|----------|-------|------------------------|
| TTTGACTT  | db/db1 | db/db | 612  | 0.028754 | FALSE | 0.651039 | FALSE | Pericyte               |
| TTTGACTT  | db/db1 | db/db | 547  | 0.011319 | FALSE | 1.584456 | FALSE | Endothelia Capillary E |
| TTTGACTT  | db/db1 | db/db | 5326 | 0.382671 | TRUE  | 1.511397 | FALSE |                        |
| TTTGATCC  | db/db1 | db/db | 483  | 0.024534 | FALSE | 1.099038 | FALSE | Photoreceptor          |
| TTTGATCC  | db/db1 | db/db | 778  | 0.059406 | FALSE | 1.071038 | FALSE | Photoreceptor          |
| TTTGATCC  | db/db1 | db/db | 735  | 0.031973 | FALSE | 1.207406 | FALSE | Photoreceptor          |
| TTTGATCC  | db/db1 | db/db | 894  | 0.017114 | FALSE | 1.522924 | FALSE | Endothelia Capillary E |
| TTTGATCG  | db/db1 | db/db | 982  | 0.146004 | TRUE  | 1.467351 | FALSE |                        |
| TTTGATCT  | db/db1 | db/db | 3576 | 0.038251 | FALSE | 1.238356 | FALSE | Photoreceptor          |
| TTTGATCT  | db/db1 | db/db | 2267 | 0.014151 | FALSE | 1.358747 | FALSE | Endothelia Venous EC   |
| TTTGATCT  | db/db1 | db/db | 1054 | 0.05065  | FALSE | 1.693408 | FALSE | Endothelia EC-C4       |
| TTTGGAG   | db/db1 | db/db | 3286 | 0.028754 | FALSE | 0.497792 | FALSE | Photoreceptor          |
| TTTGGAG   | db/db1 | db/db | 2043 | 0.006683 | FALSE | 1.005271 | FALSE | Endothelia Capillary E |
| TTTGGAG   | db/db1 | db/db | 428  | 0.053718 | FALSE | 3.167482 | FALSE | Endothelia Capillary E |
| TTTGGAG   | db/db1 | db/db | 1701 | 0.011805 | FALSE | 1.134736 | FALSE | Endothelia Capillary E |
| TTTGGAG   | db/db1 | db/db | 1139 | 0.009063 | FALSE | 0.993281 | FALSE | Endothelia Capillary E |
| TTTGGAG   | db/db1 | db/db | 673  | 0.130259 | TRUE  | 3.871577 | FALSE |                        |
| TTTGGAG   | db/db1 | db/db | 3649 | 0.015287 | FALSE | 1.095628 | FALSE | Photoreceptor          |
| TTTGGAG   | db/db1 | db/db | 6853 | 0.05065  | FALSE | 0.717344 | FALSE | Photoreceptor          |
| TTTGGAG   | db/db1 | db/db | 497  | 0.022857 | FALSE | 0.573669 | FALSE | Photoreceptor          |
| TTTGGAG   | db/db1 | db/db | 2393 | 0.037564 | FALSE | 0.839152 | FALSE | Neuron                 |
| TTTGGAG   | db/db1 | db/db | 2738 | 0.067388 | FALSE | 0.689191 | FALSE | Endothelia Capillary E |
| TTTGGTTA  | db/db1 | db/db | 8499 | 0.016181 | FALSE | 0.399522 | FALSE | Photoreceptor          |
| TTTGGTTA  | db/db1 | db/db | 4166 | 0.015879 | FALSE | 0.728171 | FALSE | Endothelia EC-C4       |
| TTTGGTTA  | db/db1 | db/db | 1510 | 0.051646 | FALSE | 1.161059 | FALSE | Photoreceptor          |
| TTTGGTTG  | db/db1 | db/db | 710  | 0.067388 | FALSE | 0.785586 | FALSE | Photoreceptor          |
| TTTGGTTGA | db/db1 | db/db | 515  | 0.080645 | FALSE | 1.253905 | FALSE | Photoreceptor          |
| TTTGGTTGA | db/db1 | db/db | 3070 | 0.008032 | FALSE | 0.664778 | FALSE | Neuron                 |
| TTTGGTGC  | db/db1 | db/db | 471  | 0.100845 | TRUE  | 18.98907 | TRUE  |                        |
| TTTGGTGG  | db/db1 | db/db | 1633 | 0.019106 | FALSE | 1.021507 | FALSE | Endothelia EC-C4       |
| TTTGGTGG  | db/db1 | db/db | 2329 | 0.017434 | FALSE | 1.073416 | FALSE | Neuron                 |
| TTTGGTGT  | db/db1 | db/db | 3805 | 0.024105 | FALSE | 0.357465 | FALSE | Photoreceptor          |
| TTTGGTGT  | db/db1 | db/db | 1681 | 0.006499 | FALSE | 1.194703 | FALSE | Endothelia EC-C4       |
| TTTGGTGT  | db/db1 | db/db | 493  | 0.131994 | TRUE  | 3.757225 | FALSE |                        |
| AAACCCA   | db/db2 | db/db | 2409 | 0.107669 | TRUE  | 2.466479 | FALSE |                        |
| AAACCCAC  | db/db2 | db/db | 3613 | 0.024971 | FALSE | 1.029132 | FALSE | Endothelia Capillary E |
| AAACCCAC  | db/db2 | db/db | 822  | 0.024105 | FALSE | 57.43782 | TRUE  |                        |
| AAACCCAC  | db/db2 | db/db | 2700 | 0.014997 | FALSE | 0.994595 | FALSE | Endothelia Capillary E |
| AAACCCAC  | db/db2 | db/db | 1229 | 0.023266 | FALSE | 0.741258 | FALSE | Photoreceptor          |
| AAACCCAT  | db/db2 | db/db | 9792 | 0.314286 | TRUE  | 1.093012 | FALSE |                        |
| AAACGAA   | db/db2 | db/db | 8437 | 0.076994 | FALSE | 0.910646 | FALSE | Neuron                 |
| AAACGAA   | db/db2 | db/db | 1985 | 0.016488 | FALSE | 0.520181 | FALSE | Photoreceptor          |
| AAACGAA   | db/db2 | db/db | 465  | 0.080645 | FALSE | 3.305925 | FALSE | Endothelia Capillary E |
| AAACGAA   | db/db2 | db/db | 406  | 0.065957 | FALSE | 8.302583 | TRUE  |                        |
| AAACGAA   | db/db2 | db/db | 7140 | 0.027758 | FALSE | 0.871131 | FALSE | Photoreceptor          |
| AAACGAA   | db/db2 | db/db | 3055 | 0.028251 | FALSE | 0.984588 | FALSE | Photoreceptor          |
| AAACGCTC  | db/db2 | db/db | 413  | 0.063221 | FALSE | 26.23188 | TRUE  |                        |

|                 |       |      |          |       |          |       |                        |
|-----------------|-------|------|----------|-------|----------|-------|------------------------|
| AAACGCTC db/db2 | db/db | 2783 | 0.020536 | FALSE | 0.554329 | FALSE | Photoreceptor          |
| AAACGCTC db/db2 | db/db | 674  | 0.042704 | FALSE | 23.62832 | TRUE  |                        |
| AAACGCTC db/db2 | db/db | 3873 | 0.016488 | FALSE | 1.373092 | FALSE | Endothelia Venous EC   |
| AAACGCTT db/db2 | db/db | 2771 | 0.020171 | FALSE | 1.453387 | FALSE | Endothelia Aterial EC  |
| AAAGAAC db/db2  | db/db | 8920 | 0.024534 | FALSE | 0.510999 | FALSE | Photoreceptor          |
| AAAGAAC db/db2  | db/db | 5511 | 0.042704 | FALSE | 0.938186 | FALSE | Photoreceptor          |
| AAAGGAT db/db2  | db/db | 775  | 0.071958 | FALSE | 1.610067 | FALSE | Photoreceptor          |
| AAAGGAT db/db2  | db/db | 1666 | 0.025416 | FALSE | 1.219335 | FALSE | Endothelia Capillary E |
| AAAGGAT db/db2  | db/db | 518  | 0.025868 | FALSE | 2.053935 | FALSE | Endothelia Aterial EC  |
| AAAGGGC db/db2  | db/db | 873  | 0.058205 | FALSE | 2.312005 | FALSE | Photoreceptor          |
| AAAGGGC db/db2  | db/db | 437  | 0.055901 | FALSE | 3.888403 | FALSE | Muller cell            |
| AAAGGGC db/db2  | db/db | 736  | 0.051646 | FALSE | 2.629677 | FALSE | Muller cell            |
| AAAGGGC db/db2  | db/db | 1055 | 0.063221 | FALSE | 29.38204 | TRUE  |                        |
| AAAGGGC db/db2  | db/db | 474  | 0.103567 | TRUE  | 12.44696 | TRUE  |                        |
| AAAGGGC db/db2  | db/db | 4640 | 0.019455 | FALSE | 0.84597  | FALSE | Photoreceptor          |
| AAAGGGC db/db2  | db/db | 1214 | 0.032546 | FALSE | 0.491502 | FALSE | Photoreceptor          |
| AAAGGTA db/db2  | db/db | 4945 | 0.025868 | FALSE | 0.962412 | FALSE | Endothelia EC-C4       |
| AAAGGTA db/db2  | db/db | 5199 | 0.034954 | FALSE | 0.912742 | FALSE | Photoreceptor          |
| AAAGGTA db/db2  | db/db | 556  | 0.031411 | FALSE | 33.68421 | TRUE  |                        |
| AAAGTCC db/db2  | db/db | 3643 | 0.015287 | FALSE | 0.210513 | FALSE | Photoreceptor          |
| AAAGTCC db/db2  | db/db | 344  | 0.022857 | FALSE | 58.50401 | TRUE  |                        |
| AAAGTCT db/db2  | db/db | 5461 | 0.034334 | FALSE | 1.099684 | FALSE | Photoreceptor          |
| AAAGTGA db/db2  | db/db | 454  | 0.026328 | FALSE | 52.75472 | TRUE  |                        |
| AAAGTGA db/db2  | db/db | 4407 | 0.059406 | FALSE | 0.861909 | FALSE | Endothelia EC-C4       |
| AAAGTGA db/db2  | db/db | 845  | 0.024971 | FALSE | 2.207511 | FALSE | Photoreceptor          |
| AAAGTGA db/db2  | db/db | 1683 | 0.030859 | FALSE | 0.508481 | FALSE | Photoreceptor          |
| AAATGGA db/db2  | db/db | 1767 | 0.024971 | FALSE | 1.929366 | FALSE | Endothelia Capillary E |
| AAATGGA db/db2  | db/db | 2162 | 0.080645 | FALSE | 1.396291 | FALSE | Photoreceptor          |
| AAATGGA db/db2  | db/db | 3204 | 0.063221 | FALSE | 1.338907 | FALSE | Photoreceptor          |
| AACAAAG db/db2  | db/db | 292  | 0.021669 | FALSE | 50.81744 | TRUE  |                        |
| AACAAAG db/db2  | db/db | 930  | 0.016181 | FALSE | 0.472063 | FALSE | Photoreceptor          |
| AACAAAG db/db2  | db/db | 1021 | 0.020171 | FALSE | 0.644726 | FALSE | Photoreceptor          |
| AACAAAG db/db2  | db/db | 479  | 0.334395 | TRUE  | 24.94145 | TRUE  |                        |
| AACAAAG db/db2  | db/db | 345  | 0.016488 | FALSE | 55.88803 | TRUE  |                        |
| AACAAAG db/db2  | db/db | 873  | 0.025868 | FALSE | 0.632705 | FALSE | Photoreceptor          |
| AACAACCA db/db2 | db/db | 5701 | 0.04192  | FALSE | 0.807897 | FALSE | Photoreceptor          |
| AACAACCC db/db2 | db/db | 7226 | 0.153234 | TRUE  | 2.109614 | FALSE |                        |
| AACAACCC db/db2 | db/db | 2577 | 0.063221 | FALSE | 1.074259 | FALSE | Pericyte               |
| AACAACCC db/db2 | db/db | 974  | 0.115723 | TRUE  | 9.448036 | TRUE  |                        |
| AACAACCC db/db2 | db/db | 2738 | 0.058205 | FALSE | 1.40984  | FALSE | Endothelia EC-C4       |
| AACAACCC db/db2 | db/db | 1740 | 0.021286 | FALSE | 3.707993 | FALSE | Muller cell            |
| AACAACCC db/db2 | db/db | 2565 | 0.042704 | FALSE | 1.240977 | FALSE | Microglia              |
| AACAACCC db/db2 | db/db | 7303 | 0.014429 | FALSE | 0.409943 | FALSE | Photoreceptor          |
| AACAAGA db/db2  | db/db | 3768 | 0.022857 | FALSE | 0.751102 | FALSE | Photoreceptor          |
| AACACACC db/db2 | db/db | 3189 | 0.029787 | FALSE | 1.224322 | FALSE | Endothelia Venous EC   |
| AACACACC db/db2 | db/db | 977  | 0.028251 | FALSE | 2.793802 | FALSE | Muller cell            |
| AACACACT db/db2 | db/db | 3754 | 0.043505 | FALSE | 1.443383 | FALSE | Endothelia Capillary E |

|          |        |       |      |          |       |          |       |                        |
|----------|--------|-------|------|----------|-------|----------|-------|------------------------|
| AACACACT | db/db2 | db/db | 5149 | 0.017434 | FALSE | 1.03593  | FALSE | Endothelia EC-C4       |
| AACAGGG  | db/db2 | db/db | 4534 | 0.022455 | FALSE | 0.997757 | FALSE | Endothelia Venous EC   |
| AACAGGG  | db/db2 | db/db | 7743 | 0.027273 | FALSE | 1.003251 | FALSE | Photoreceptor          |
| AACAGGG  | db/db2 | db/db | 3290 | 0.048732 | FALSE | 1.588332 | FALSE | Photoreceptor          |
| AACCAACC | db/db2 | db/db | 2645 | 0.120957 | TRUE  | 2.468393 | FALSE |                        |
| AACCAACC | db/db2 | db/db | 6376 | 0.010157 | FALSE | 0.383089 | FALSE | Photoreceptor          |
| AACCACA  | db/db2 | db/db | 887  | 0.017114 | FALSE | 2.571235 | FALSE | Muller cell            |
| AACCATG  | db/db2 | db/db | 1713 | 0.024534 | FALSE | 1.298648 | FALSE | Endothelia Venous EC   |
| AACCATG  | db/db2 | db/db | 5032 | 0.010846 | FALSE | 0.998579 | FALSE | Endothelia Venous EC   |
| AACCCAA  | db/db2 | db/db | 1146 | 0.011805 | FALSE | 2.141375 | FALSE | Muller cell            |
| AACCCAA  | db/db2 | db/db | 1068 | 0.015879 | FALSE | 0.452511 | FALSE | Photoreceptor          |
| AACCCAAC | db/db2 | db/db | 1473 | 0.088776 | FALSE | 1.924108 | FALSE | Photoreceptor          |
| AACCCAAC | db/db2 | db/db | 592  | 0.034334 | FALSE | 2.402014 | FALSE | Muller cell            |
| AACCCAAC | db/db2 | db/db | 8163 | 0.058205 | FALSE | 0.745147 | FALSE | Endothelia EC-C4       |
| AACCTGA  | db/db2 | db/db | 4354 | 0.021286 | FALSE | 0.537309 | FALSE | Photoreceptor          |
| AACCTGAC | db/db2 | db/db | 4750 | 0.014429 | FALSE | 1.072564 | FALSE | Photoreceptor          |
| AACCTGAC | db/db2 | db/db | 3047 | 0.061912 | FALSE | 1.142842 | FALSE | Endothelia Venous EC   |
| AACCTGAT | db/db2 | db/db | 1373 | 0.005607 | FALSE | 1.465133 | FALSE | Pericyte               |
| AACCTTTC | db/db2 | db/db | 689  | 0.084562 | FALSE | 1.354034 | FALSE | Photoreceptor          |
| AACCTTTT | db/db2 | db/db | 2374 | 0.034334 | FALSE | 1.923081 | FALSE | Endothelia Capillary E |
| AACCTTTT | db/db2 | db/db | 380  | 0.265464 | TRUE  | 2.234637 | FALSE |                        |
| AACCTTTT | db/db2 | db/db | 1614 | 0.051646 | FALSE | 1.363842 | FALSE | Photoreceptor          |
| AACGAAA  | db/db2 | db/db | 1398 | 0.053718 | FALSE | 3.377555 | FALSE | Muller cell            |
| AACGAAA  | db/db2 | db/db | 1592 | 0.05065  | FALSE | 1.037107 | FALSE | Photoreceptor          |
| AACGAAA  | db/db2 | db/db | 8720 | 0.017434 | FALSE | 0.734364 | FALSE | Photoreceptor          |
| AACGGGA  | db/db2 | db/db | 5299 | 0.014997 | FALSE | 0.839077 | FALSE | Photoreceptor          |
| AACGGGA  | db/db2 | db/db | 3024 | 0.044326 | FALSE | 1.17616  | FALSE | Endothelia Venous EC   |
| AACGGGA  | db/db2 | db/db | 5954 | 0.017434 | FALSE | 1.04893  | FALSE | Photoreceptor          |
| AACGGGA  | db/db2 | db/db | 412  | 0.039671 | FALSE | 37.84047 | TRUE  |                        |
| AACGGGA  | db/db2 | db/db | 386  | 0.032546 | FALSE | 43.27309 | TRUE  |                        |
| AACGTCA  | db/db2 | db/db | 3091 | 0.013876 | FALSE | 0.827914 | FALSE | Endothelia EC-C4       |
| AACGTCA  | db/db2 | db/db | 1453 | 0.038953 | FALSE | 1.2336   | FALSE | Photoreceptor          |
| AACTTCTG | db/db2 | db/db | 350  | 0.126437 | TRUE  | 11.35029 | TRUE  |                        |
| AACTTCTT | db/db2 | db/db | 644  | 0.046025 | FALSE | 3.095616 | FALSE | Muller cell            |
| AACTTCTT | db/db2 | db/db | 436  | 0.08663  | FALSE | 28.55297 | TRUE  |                        |
| AACTTCTT | db/db2 | db/db | 2349 | 0.053718 | FALSE | 1.415557 | FALSE | Photoreceptor          |
| AAGAACA  | db/db2 | db/db | 494  | 0.019455 | FALSE | 2.354052 | FALSE | Photoreceptor          |
| AAGAACA  | db/db2 | db/db | 678  | 0.082569 | FALSE | 2.149699 | FALSE | Endothelia Capillary E |
| AAGAACA  | db/db2 | db/db | 679  | 0.030318 | FALSE | 2.972391 | FALSE | Pericyte               |
| AAGACAA  | db/db2 | db/db | 781  | 0.138889 | TRUE  | 4.600694 | FALSE |                        |
| AAGACAA  | db/db2 | db/db | 2921 | 0.041154 | FALSE | 1.174876 | FALSE | Endothelia EC-C4       |
| AAGACTCC | db/db2 | db/db | 159  | 0.113205 | TRUE  | 1.071429 | FALSE |                        |
| AAGACTCC | db/db2 | db/db | 335  | 0.073582 | FALSE | 42.60516 | TRUE  |                        |
| AAGACTCC | db/db2 | db/db | 3190 | 0.054795 | FALSE | 1.029901 | FALSE | Photoreceptor          |
| AAGATAG  | db/db2 | db/db | 1886 | 0.014997 | FALSE | 1.385496 | FALSE | Endothelia Capillary E |
| AAGATAG  | db/db2 | db/db | 2738 | 0.036232 | FALSE | 1.167079 | FALSE | Photoreceptor          |
| AAGATAG  | db/db2 | db/db | 546  | 0.044326 | FALSE | 8.15822  | TRUE  |                        |

|                 |       |      |          |       |          |       |                        |
|-----------------|-------|------|----------|-------|----------|-------|------------------------|
| AAGATAG( db/db2 | db/db | 4487 | 0.020536 | FALSE | 0.730073 | FALSE | Photoreceptor          |
| AAGATAG` db/db2 | db/db | 6135 | 0.015581 | FALSE | 0.558471 | FALSE | Photoreceptor          |
| AAGCATC/ db/db2 | db/db | 2235 | 0.017114 | FALSE | 1.250564 | FALSE | Endothelia Capillary E |
| AAGCATCC db/db2 | db/db | 1754 | 0.017758 | FALSE | 1.214728 | FALSE | Photoreceptor          |
| AAGCATCC db/db2 | db/db | 862  | 0.084562 | FALSE | 18.66372 | TRUE  |                        |
| AAGCATCT db/db2 | db/db | 1735 | 0.041154 | FALSE | 1.1932   | FALSE | Photoreceptor          |
| AAGCCAT/ db/db2 | db/db | 1941 | 0.034954 | FALSE | 1.70886  | FALSE | Pericyte               |
| AAGCCATC db/db2 | db/db | 8963 | 0.022059 | FALSE | 0.521017 | FALSE | Photoreceptor          |
| AAGCCATC db/db2 | db/db | 413  | 0.068864 | FALSE | 21.77914 | TRUE  |                        |
| AAGCGAG, db/db2 | db/db | 3131 | 0.009277 | FALSE | 1.081635 | FALSE | Endothelia Capillary E |
| AAGCGAG, db/db2 | db/db | 1000 | 0.012303 | FALSE | 0.514883 | FALSE | Photoreceptor          |
| AAGCGAG, db/db2 | db/db | 1174 | 0.027758 | FALSE | 0.76496  | FALSE | Photoreceptor          |
| AAGCGAG, db/db2 | db/db | 381  | 0.031411 | FALSE | 3.869238 | FALSE | Muller cell            |
| AAGCGAG` db/db2 | db/db | 7659 | 0.020536 | FALSE | 0.758239 | FALSE | Photoreceptor          |
| AAGCGTT/ db/db2 | db/db | 665  | 0.047807 | FALSE | 4.999448 | FALSE | Muller cell            |
| AAGCGTT/ db/db2 | db/db | 1411 | 0.021286 | FALSE | 1.651573 | FALSE | Endothelia Capillary E |
| AAGCGTT( db/db2 | db/db | 905  | 0.013074 | FALSE | 2.22029  | FALSE | Muller cell            |
| AAGCGTT( db/db2 | db/db | 6096 | 0.088776 | FALSE | 0.936379 | FALSE | Endothelia EC-C4       |
| AAGCGTTI db/db2 | db/db | 6128 | 0.017434 | FALSE | 0.843355 | FALSE | Endothelia EC-C4       |
| AAGGAAT/ db/db2 | db/db | 7702 | 0.020536 | FALSE | 0.960709 | FALSE | Photoreceptor          |
| AAGGAAT( db/db2 | db/db | 1899 | 0.041154 | FALSE | 1.576716 | FALSE | Endothelia Capillary E |
| AAGGAAT` db/db2 | db/db | 3287 | 0.009933 | FALSE | 1.214922 | FALSE | Endothelia EC-C4       |
| AAGGAAT` db/db2 | db/db | 368  | 0.031973 | FALSE | 21.76991 | TRUE  |                        |
| AAGGAAT` db/db2 | db/db | 728  | 0.029787 | FALSE | 0.629994 | FALSE | Photoreceptor          |
| AAGGTAA` db/db2 | db/db | 3776 | 0.031411 | FALSE | 1.051659 | FALSE | Endothelia Venous EC   |
| AAGTACCT db/db2 | db/db | 2899 | 0.024105 | FALSE | 1.489406 | FALSE | Endothelia Venous EC   |
| AAGTCGT( db/db2 | db/db | 969  | 0.024105 | FALSE | 2.03478  | FALSE | Endothelia Capillary E |
| AAGTCGT( db/db2 | db/db | 817  | 0.022059 | FALSE | 2.09503  | FALSE | Photoreceptor          |
| AAGTCGTI db/db2 | db/db | 792  | 0.042704 | FALSE | 1.197924 | FALSE | Photoreceptor          |
| AAGTGAA, db/db2 | db/db | 386  | 0.009493 | FALSE | 3.672409 | FALSE | Muller cell            |
| AAGTGAA, db/db2 | db/db | 3421 | 0.046025 | FALSE | 1.449725 | FALSE | Photoreceptor          |
| AAGTGAA( db/db2 | db/db | 2925 | 0.019455 | FALSE | 0.992773 | FALSE | Endothelia Venous EC   |
| AAGTGAA( db/db2 | db/db | 3006 | 0.095727 | FALSE | 1.544022 | FALSE | Muller cell            |
| AAGTGAA( db/db2 | db/db | 590  | 0.013338 | FALSE | 0.466437 | FALSE | Photoreceptor          |
| AAGTGAA( db/db2 | db/db | 4340 | 0.058205 | FALSE | 1.257998 | FALSE | Photoreceptor          |
| AAGTGAA` db/db2 | db/db | 1105 | 0.039671 | FALSE | 4.32428  | FALSE | Muller cell            |
| AAGTGAA` db/db2 | db/db | 4143 | 0.043505 | FALSE | 0.987803 | FALSE | Endothelia EC-C4       |
| AAGTGAA` db/db2 | db/db | 4104 | 0.032546 | FALSE | 1.109622 | FALSE | Endothelia Capillary E |
| AAGTGAA` db/db2 | db/db | 801  | 0.017758 | FALSE | 0.264506 | FALSE | Pericyte               |
| AAGTGAA` db/db2 | db/db | 3965 | 0.052669 | FALSE | 1.007497 | FALSE | Endothelia Venous EC   |
| AAGTTCG( db/db2 | db/db | 790  | 0.006683 | FALSE | 1.695763 | FALSE | Endothelia EC-C4       |
| AATAGAG( db/db2 | db/db | 354  | 0.013074 | FALSE | 3.798067 | FALSE | Muller cell            |
| AATAGAG( db/db2 | db/db | 7288 | 0.01981  | FALSE | 0.600141 | FALSE | Photoreceptor          |
| AATAGAG( db/db2 | db/db | 4036 | 0.007058 | FALSE | 1.628481 | FALSE | Photoreceptor          |
| AATAGAG` db/db2 | db/db | 2262 | 0.015879 | FALSE | 1.457564 | FALSE | Endothelia Capillary E |
| AATCACG( db/db2 | db/db | 1428 | 0.054795 | FALSE | 1.796235 | FALSE | Photoreceptor          |
| AATCACG( db/db2 | db/db | 337  | 0.093319 | FALSE | 20.86466 | TRUE  |                        |

|                 |       |      |          |       |          |       |                         |
|-----------------|-------|------|----------|-------|----------|-------|-------------------------|
| AATCACGT db/db2 | db/db | 6539 | 0.017758 | FALSE | 0.580858 | FALSE | Photoreceptor           |
| AATCGAC db/db2  | db/db | 614  | 0.054795 | FALSE | 3.84145  | FALSE | Muller cell             |
| AATCGACC db/db2 | db/db | 5414 | 0.024534 | FALSE | 0.818075 | FALSE | Photoreceptor           |
| AATCGACC db/db2 | db/db | 5742 | 0.036232 | FALSE | 1.028539 | FALSE | Photoreceptor           |
| AATCGACC db/db2 | db/db | 1633 | 0.046906 | FALSE | 0.678284 | FALSE | Photoreceptor           |
| AATCGTGT db/db2 | db/db | 971  | 0.045165 | FALSE | 3.090135 | FALSE | Muller cell             |
| AATGAAG db/db2  | db/db | 3799 | 0.014997 | FALSE | 0.948055 | FALSE | Endothelia Venous EC    |
| AATGAAG db/db2  | db/db | 5475 | 0.023682 | FALSE | 0.958405 | FALSE | Endothelia Venous EC    |
| AATGAAG db/db2  | db/db | 611  | 0.010157 | FALSE | 2.923583 | FALSE | Muller cell             |
| AATGAAG db/db2  | db/db | 960  | 0.007249 | FALSE | 1.479193 | FALSE | Endothelia Capillary EC |
| AATGACC db/db2  | db/db | 497  | 0.024971 | FALSE | 2.524724 | FALSE | Photoreceptor           |
| AATGACC db/db2  | db/db | 825  | 0.028754 | FALSE | 0.731285 | FALSE | Photoreceptor           |
| AATGACC db/db2  | db/db | 1443 | 0.016488 | FALSE | 1.538549 | FALSE | Endothelia EC-C4        |
| AATGACCT db/db2 | db/db | 806  | 0.007441 | FALSE | 1.989615 | FALSE | Endothelia Capillary EC |
| AATGACCT db/db2 | db/db | 2829 | 0.014151 | FALSE | 0.967624 | FALSE | Photoreceptor           |
| AATGCCAC db/db2 | db/db | 1353 | 0.011081 | FALSE | 2.065279 | FALSE | Pericyte                |
| AATGCCAC db/db2 | db/db | 5714 | 0.042704 | FALSE | 1.087394 | FALSE | Endothelia Capillary EC |
| AATGCCAT db/db2 | db/db | 2544 | 0.025416 | FALSE | 1.312399 | FALSE | Endothelia Capillary EC |
| AATGGAA db/db2  | db/db | 2097 | 0.08663  | FALSE | 1.85547  | FALSE | Photoreceptor           |
| AATGGAA db/db2  | db/db | 7036 | 0.033726 | FALSE | 0.842592 | FALSE | Photoreceptor           |
| AATGGAA db/db2  | db/db | 301  | 0.042704 | FALSE | 62.14533 | TRUE  |                         |
| AATGGCT db/db2  | db/db | 4614 | 0.071958 | FALSE | 1.104475 | FALSE | Endothelia Venous EC    |
| AATGGCT db/db2  | db/db | 4499 | 0.049679 | FALSE | 1.467293 | FALSE | Photoreceptor           |
| AATGGCT db/db2  | db/db | 5838 | 0.03313  | FALSE | 0.835946 | FALSE | Photoreceptor           |
| AATGGCT db/db2  | db/db | 1843 | 0.013605 | FALSE | 0.773007 | FALSE | Photoreceptor           |
| AATGGCT db/db2  | db/db | 815  | 0.047807 | FALSE | 1.81244  | FALSE | Muller cell             |
| AATGGCT db/db2  | db/db | 3262 | 0.045165 | FALSE | 1.182119 | FALSE | Photoreceptor           |
| AATGGCT db/db2  | db/db | 2173 | 0.044326 | FALSE | 1.28163  | FALSE | Endothelia Capillary EC |
| AATGGCT db/db2  | db/db | 371  | 0.04192  | FALSE | 34.51705 | TRUE  |                         |
| AATTCCTA db/db2 | db/db | 2149 | 0.028754 | FALSE | 1.59945  | FALSE | Endothelia Capillary EC |
| AATTCCTC db/db2 | db/db | 911  | 0.143501 | TRUE  | 16.13092 | TRUE  |                         |
| AATTCCTT db/db2 | db/db | 1408 | 0.065957 | FALSE | 13.55086 | TRUE  |                         |
| AATTCCTT db/db2 | db/db | 3086 | 0.035586 | FALSE | 0.865668 | FALSE | Photoreceptor           |
| AATTTCCG db/db2 | db/db | 3292 | 0.028251 | FALSE | 0.385531 | FALSE | Photoreceptor           |
| ACAAAGA db/db2  | db/db | 1037 | 0.098234 | FALSE | 1.133264 | FALSE | Endothelia Venous EC    |
| ACAAAGA db/db2  | db/db | 7577 | 0.026796 | FALSE | 0.949214 | FALSE | Photoreceptor           |
| ACAAAGA db/db2  | db/db | 3557 | 0.011805 | FALSE | 1.076835 | FALSE | Endothelia EC-C4        |
| ACAAAGA db/db2  | db/db | 457  | 0.022059 | FALSE | 55.09227 | TRUE  |                         |
| ACAAAGA db/db2  | db/db | 1738 | 0.018422 | FALSE | 0.455238 | FALSE | Photoreceptor           |
| ACAACCA db/db2  | db/db | 1031 | 0.024971 | FALSE | 0.16955  | FALSE | Photoreceptor           |
| ACAACCA db/db2  | db/db | 1274 | 0.053718 | FALSE | 1.600647 | FALSE | Endothelia EC-C4        |
| ACAAGCTC db/db2 | db/db | 1175 | 0.043505 | FALSE | 0.715744 | FALSE | Photoreceptor           |
| ACAAGCTC db/db2 | db/db | 2002 | 0.020908 | FALSE | 1.049002 | FALSE | Endothelia EC-C4        |
| ACACAGTC db/db2 | db/db | 682  | 0.015581 | FALSE | 4.40616  | FALSE | Muller cell             |
| ACACAGTC db/db2 | db/db | 649  | 0.13452  | TRUE  | 8.450704 | TRUE  |                         |
| ACACCAAC db/db2 | db/db | 1183 | 0.026796 | FALSE | 0.413762 | FALSE | Photoreceptor           |
| ACACCAAC db/db2 | db/db | 1338 | 0.049679 | FALSE | 44.77325 | TRUE  |                         |



|                  |       |      |          |       |          |       |                         |
|------------------|-------|------|----------|-------|----------|-------|-------------------------|
| ACACCAAT db/db2  | db/db | 8034 | 0.023682 | FALSE | 0.604272 | FALSE | Photoreceptor           |
| ACACCAAT db/db2  | db/db | 1384 | 0.103567 | TRUE  | 7.581349 | TRUE  |                         |
| ACACCAAT db/db2  | db/db | 387  | 0.063221 | FALSE | 4.366002 | FALSE | Muller cell             |
| ACACGCG/ db/db2  | db/db | 4356 | 0.022455 | FALSE | 1.455282 | FALSE | Neuron                  |
| ACACGCG/ db/db2  | db/db | 4296 | 0.091004 | FALSE | 1.321968 | FALSE | Neuron                  |
| ACACGCG1 db/db2  | db/db | 446  | 0.058205 | FALSE | 3.41371  | FALSE | Muller cell             |
| ACACTGA/ db/db2  | db/db | 4237 | 0.021669 | FALSE | 0.709358 | FALSE | Photoreceptor           |
| ACACTGA/ db/db2  | db/db | 4097 | 0.020908 | FALSE | 0.779856 | FALSE | Photoreceptor           |
| ACACTGAC db/db2  | db/db | 1489 | 0.041154 | FALSE | 0.813833 | FALSE | Photoreceptor           |
| ACAGAAA/ db/db2  | db/db | 3304 | 0.100845 | TRUE  | 7.102434 | TRUE  |                         |
| ACAGAAA( db/db2  | db/db | 369  | 0.039671 | FALSE | 4.527508 | FALSE | Muller cell             |
| ACAGCCG( db/db2  | db/db | 3322 | 0.023266 | FALSE | 0.595661 | FALSE | Photoreceptor           |
| ACAGCCG( db/db2  | db/db | 1548 | 0.080645 | FALSE | 10.11318 | TRUE  |                         |
| ACAGCCG1 db/db2  | db/db | 5643 | 0.037564 | FALSE | 1.374144 | FALSE | Photoreceptor           |
| ACAGGGA/ db/db2  | db/db | 5362 | 0.046906 | FALSE | 1.240736 | FALSE | Photoreceptor           |
| ACAGGGA' db/db2  | db/db | 944  | 0.017114 | FALSE | 0.970032 | FALSE | Photoreceptor           |
| ACAGGGA' db/db2  | db/db | 1099 | 0.045165 | FALSE | 1.201667 | FALSE | Photoreceptor           |
| ACATCCCA db/db2  | db/db | 420  | 0.064568 | FALSE | 1.75367  | FALSE | Photoreceptor           |
| ACATCCCA db/db2  | db/db | 399  | 0.045165 | FALSE | 2.65069  | FALSE | Muller cell             |
| ACATCCCA db/db2  | db/db | 6732 | 0.046025 | FALSE | 0.789918 | FALSE | Photoreceptor           |
| ACATCCCC db/db2  | db/db | 489  | 0.012557 | FALSE | 0.619153 | FALSE | Photoreceptor           |
| ACATCCCC db/db2  | db/db | 3206 | 0.04192  | FALSE | 0.888931 | FALSE | Photoreceptor           |
| ACATCCCC db/db2  | db/db | 7111 | 0.032546 | FALSE | 0.889884 | FALSE | Endothelia Venous EC    |
| ACATCCCC db/db2  | db/db | 5497 | 0.177638 | TRUE  | 1.965066 | FALSE |                         |
| ACATCGAC db/db2  | db/db | 581  | 0.017758 | FALSE | 2.033009 | FALSE | Pericyte                |
| ACATCGAC db/db2  | db/db | 3196 | 0.029266 | FALSE | 1.363577 | FALSE | Pericyte                |
| ACATCGAC db/db2  | db/db | 1582 | 0.036891 | FALSE | 2.102757 | FALSE | Photoreceptor           |
| ACATCGAC db/db2  | db/db | 971  | 0.044326 | FALSE | 0.896674 | FALSE | Photoreceptor           |
| ACATCGAT db/db2  | db/db | 2380 | 0.03313  | FALSE | 1.26902  | FALSE | Neuron                  |
| ACATGCAC db/db2  | db/db | 5351 | 0.017758 | FALSE | 0.495633 | FALSE | Photoreceptor           |
| ACATGCAC db/db2  | db/db | 680  | 0.012557 | FALSE | 0.323071 | FALSE | Photoreceptor           |
| ACATGCAT db/db2  | db/db | 767  | 0.036232 | FALSE | 0.679687 | FALSE | Photoreceptor           |
| ACATTTCC db/db2  | db/db | 9122 | 0.022455 | FALSE | 0.824265 | FALSE | Photoreceptor           |
| ACATTTCC db/db2  | db/db | 1280 | 0.023682 | FALSE | 1.246704 | FALSE | Photoreceptor           |
| ACATTTCC db/db2  | db/db | 9082 | 0.015879 | FALSE | 0.600004 | FALSE | Photoreceptor           |
| ACATTTCC db/db2  | db/db | 401  | 0.008234 | FALSE | 1.903631 | FALSE | Muller cell             |
| ACATTTCC db/db2  | db/db | 2697 | 0.032546 | FALSE | 1.257365 | FALSE | Photoreceptor           |
| ACATTTCT1 db/db2 | db/db | 468  | 0.041154 | FALSE | 4.188317 | FALSE | Muller cell             |
| ACCAAAC( db/db2  | db/db | 9602 | 0.012052 | FALSE | 0.58088  | FALSE | Photoreceptor           |
| ACCAAAC1 db/db2  | db/db | 1827 | 0.007058 | FALSE | 1.29955  | FALSE | Endothelia Capillary EC |
| ACCAACAC db/db2  | db/db | 761  | 0.075259 | FALSE | 11.07383 | TRUE  |                         |
| ACCAACAC db/db2  | db/db | 1337 | 0.012303 | FALSE | 1.533954 | FALSE | Endothelia Capillary EC |
| ACCAACAC db/db2  | db/db | 5326 | 0.025416 | FALSE | 0.90458  | FALSE | Photoreceptor           |
| ACCAACAT db/db2  | db/db | 1955 | 0.071958 | FALSE | 1.710525 | FALSE | Photoreceptor           |
| ACCACAA/ db/db2  | db/db | 3166 | 0.006317 | FALSE | 1.135702 | FALSE | Endothelia Capillary EC |
| ACCACAA( db/db2  | db/db | 471  | 0.067388 | FALSE | 3.763271 | FALSE | Muller cell             |
| ACCACAA( db/db2  | db/db | 2390 | 0.018088 | FALSE | 1.18118  | FALSE | Endothelia Capillary EC |

|                 |       |      |          |       |          |       |                        |
|-----------------|-------|------|----------|-------|----------|-------|------------------------|
| ACCACAAC db/db2 | db/db | 2535 | 0.016181 | FALSE | 0.835887 | FALSE | Endothelia EC-C4       |
| ACCATTTA db/db2 | db/db | 1995 | 0.014997 | FALSE | 1.238886 | FALSE | Endothelia Capillary E |
| ACCCAAA db/db2  | db/db | 1593 | 0.048732 | FALSE | 2.415399 | FALSE | Photoreceptor          |
| ACCCAAA db/db2  | db/db | 612  | 0.004598 | FALSE | 1.120163 | FALSE | Endothelia Capillary E |
| ACCCAAAC db/db2 | db/db | 3655 | 0.015287 | FALSE | 1.19876  | FALSE | Endothelia EC-C4       |
| ACCCAAAT db/db2 | db/db | 2277 | 0.039671 | FALSE | 1.770994 | FALSE | Photoreceptor          |
| ACCCAAAT db/db2 | db/db | 652  | 0.018761 | FALSE | 1.328544 | FALSE | Photoreceptor          |
| ACCCTCAC db/db2 | db/db | 9553 | 0.015581 | FALSE | 0.588465 | FALSE | Photoreceptor          |
| ACCCTTGA db/db2 | db/db | 4032 | 0.023682 | FALSE | 0.630042 | FALSE | Photoreceptor          |
| ACCCTTGC db/db2 | db/db | 462  | 0.148377 | TRUE  | 20.36083 | TRUE  |                        |
| ACCCTTGC db/db2 | db/db | 1485 | 0.057037 | FALSE | 1.598985 | FALSE | Photoreceptor          |
| ACCCTTGC db/db2 | db/db | 1594 | 0.184701 | TRUE  | 18.24904 | TRUE  |                        |
| ACCCTTGC db/db2 | db/db | 648  | 0.05065  | FALSE | 6.693712 | TRUE  |                        |
| ACCCTTGT db/db2 | db/db | 1683 | 0.073582 | FALSE | 1.250317 | FALSE | Photoreceptor          |
| ACCCTTGT db/db2 | db/db | 519  | 0.022059 | FALSE | 2.730887 | FALSE | Muller cell            |
| ACCCTTGT db/db2 | db/db | 1860 | 0.042704 | FALSE | 0.612815 | FALSE | Photoreceptor          |
| ACCGTTCC db/db2 | db/db | 2147 | 0.051646 | FALSE | 1.149587 | FALSE | Photoreceptor          |
| ACCGTTCC db/db2 | db/db | 1491 | 0.091004 | FALSE | 1.058643 | FALSE | Photoreceptor          |
| ACCGTTCC db/db2 | db/db | 9197 | 0.024971 | FALSE | 0.733228 | FALSE | Photoreceptor          |
| ACCGTTCT db/db2 | db/db | 2373 | 0.126958 | TRUE  | 4.73029  | FALSE |                        |
| ACCTACCA db/db2 | db/db | 2362 | 0.007636 | FALSE | 1.552532 | FALSE | Endothelia Capillary E |
| ACCTACCA db/db2 | db/db | 9429 | 0.015879 | FALSE | 0.738657 | FALSE | Photoreceptor          |
| ACCTACCA db/db2 | db/db | 2129 | 0.010614 | FALSE | 1.176599 | FALSE | Pericyte               |
| ACCTACCA db/db2 | db/db | 3346 | 0.008234 | FALSE | 1.031424 | FALSE | Endothelia Venous EC   |
| ACCTACCG db/db2 | db/db | 2375 | 0.008852 | FALSE | 1.044039 | FALSE | Endothelia Capillary E |
| ACCTACCG db/db2 | db/db | 1497 | 0.076994 | FALSE | 2.423827 | FALSE | Muller cell            |
| ACCTACCG db/db2 | db/db | 9550 | 0.082569 | FALSE | 0.663942 | FALSE | Photoreceptor          |
| ACCTACCG db/db2 | db/db | 637  | 0.038953 | FALSE | 4.799432 | FALSE | Muller cell            |
| ACCTACCT db/db2 | db/db | 1440 | 0.037564 | FALSE | 1.751878 | FALSE | Photoreceptor          |
| ACCTGAAC db/db2 | db/db | 1370 | 0.051646 | FALSE | 1.333364 | FALSE | Endothelia EC-C4       |
| ACCTGAAC db/db2 | db/db | 1023 | 0.040404 | FALSE | 1.872617 | FALSE | Endothelia Capillary E |
| ACCTGAAC db/db2 | db/db | 1429 | 0.063221 | FALSE | 6.093042 | TRUE  |                        |
| ACCTGAAT db/db2 | db/db | 1520 | 0.04192  | FALSE | 1.315968 | FALSE | Photoreceptor          |
| ACCTGAAT db/db2 | db/db | 2835 | 0.08663  | FALSE | 1.030121 | FALSE | Photoreceptor          |
| ACCTGAAT db/db2 | db/db | 3113 | 0.045165 | FALSE | 1.227282 | FALSE | Photoreceptor          |
| ACCTGTCA db/db2 | db/db | 5280 | 0.046025 | FALSE | 1.187355 | FALSE | Photoreceptor          |
| ACCTGTCC db/db2 | db/db | 6667 | 0.018422 | FALSE | 0.862338 | FALSE | Endothelia Venous EC   |
| ACCTGTCC db/db2 | db/db | 1229 | 0.036232 | FALSE | 3.23223  | FALSE | Muller cell            |
| ACCTGTCT db/db2 | db/db | 3505 | 0.012303 | FALSE | 1.296534 | FALSE | Photoreceptor          |
| ACCTGTCT db/db2 | db/db | 1576 | 0.034954 | FALSE | 1.117898 | FALSE | Photoreceptor          |
| ACCTGTCT db/db2 | db/db | 2005 | 0.061912 | FALSE | 2.136317 | FALSE | Muller cell            |
| ACGATCAC db/db2 | db/db | 7306 | 0.022455 | FALSE | 0.694422 | FALSE | Photoreceptor          |
| ACGATCAC db/db2 | db/db | 6013 | 0.05065  | FALSE | 1.117864 | FALSE | Photoreceptor          |
| ACGATCAC db/db2 | db/db | 940  | 0.002901 | FALSE | 1.625515 | FALSE | Pericyte               |
| ACGATCAT db/db2 | db/db | 1404 | 0.091004 | FALSE | 1.88299  | FALSE | Pericyte               |
| ACGATGT db/db2  | db/db | 591  | 0.020908 | FALSE | 2.788198 | FALSE | Muller cell            |
| ACGATGT db/db2  | db/db | 965  | 0.057037 | FALSE | 0.569858 | FALSE | Photoreceptor          |

|          |        |       |      |          |       |          |       |                        |
|----------|--------|-------|------|----------|-------|----------|-------|------------------------|
| ACGATGT  | db/db2 | db/db | 874  | 0.014711 | FALSE | 0.4873   | FALSE | Photoreceptor          |
| ACGATGT  | db/db2 | db/db | 861  | 0.08663  | FALSE | 24.32056 | TRUE  |                        |
| ACGCACG  | db/db2 | db/db | 2737 | 0.007441 | FALSE | 1.577885 | FALSE | Photoreceptor          |
| ACGCACG  | db/db2 | db/db | 1270 | 0.007249 | FALSE | 1.036662 | FALSE | Pericyte               |
| ACGCACG  | db/db2 | db/db | 401  | 0.010384 | FALSE | 2.433663 | FALSE | Endothelia Capillary E |
| ACGCACG  | db/db2 | db/db | 3109 | 0.036891 | FALSE | 0.967895 | FALSE | Photoreceptor          |
| ACGCACG  | db/db2 | db/db | 838  | 0.080645 | FALSE | 10.84431 | TRUE  |                        |
| ACGGAAG  | db/db2 | db/db | 317  | 0.046906 | FALSE | 45.95688 | TRUE  |                        |
| ACGGAAG  | db/db2 | db/db | 754  | 0.018761 | FALSE | 50.27554 | TRUE  |                        |
| ACGGAAG  | db/db2 | db/db | 497  | 0.030859 | FALSE | 39.02647 | TRUE  |                        |
| ACGGAAG  | db/db2 | db/db | 1575 | 0.019455 | FALSE | 0.56614  | FALSE | Photoreceptor          |
| ACGGGTC  | db/db2 | db/db | 4330 | 0.075259 | FALSE | 0.987914 | FALSE | Endothelia EC-C4       |
| ACGGGTC  | db/db2 | db/db | 621  | 0.024534 | FALSE | 3.336473 | FALSE | Muller cell            |
| ACGGGTC  | db/db2 | db/db | 3975 | 0.08663  | FALSE | 1.706736 | FALSE | Photoreceptor          |
| ACGGTCG  | db/db2 | db/db | 6058 | 0.054795 | FALSE | 1.057265 | FALSE | Endothelia Venous EC   |
| ACGGTCG  | db/db2 | db/db | 2495 | 0.029266 | FALSE | 0.903675 | FALSE | Photoreceptor          |
| ACGGTTA  | db/db2 | db/db | 3825 | 0.01981  | FALSE | 0.986811 | FALSE | Photoreceptor          |
| ACGGTTA  | db/db2 | db/db | 4277 | 0.13452  | TRUE  | 6.024097 | TRUE  |                        |
| ACGGTTA  | db/db2 | db/db | 791  | 0.030859 | FALSE | 1.207687 | FALSE | Photoreceptor          |
| ACGGTTA  | db/db2 | db/db | 9212 | 0.017434 | FALSE | 0.596435 | FALSE | Photoreceptor          |
| ACGGTTA  | db/db2 | db/db | 1334 | 0.018088 | FALSE | 1.245464 | FALSE | Endothelia Capillary E |
| ACGTAAC  | db/db2 | db/db | 1036 | 0.015879 | FALSE | 0.766544 | FALSE | Photoreceptor          |
| ACGTAAC  | db/db2 | db/db | 5054 | 0.042704 | FALSE | 0.936602 | FALSE | Endothelia Venous EC   |
| ACGTAAC  | db/db2 | db/db | 2280 | 0.018422 | FALSE | 1.257497 | FALSE | Endothelia Capillary E |
| ACGTAAC  | db/db2 | db/db | 1018 | 0.039671 | FALSE | 47.02925 | TRUE  |                        |
| ACGTAAC  | db/db2 | db/db | 791  | 0.095727 | FALSE | 2.309123 | FALSE | Endothelia Capillary E |
| ACGTACA  | db/db2 | db/db | 6984 | 0.042704 | FALSE | 0.791558 | FALSE | Photoreceptor          |
| ACGTACA  | db/db2 | db/db | 1553 | 0.012557 | FALSE | 1.245518 | FALSE | Endothelia Capillary E |
| ACGTACA  | db/db2 | db/db | 793  | 0.078788 | FALSE | 10.42003 | TRUE  |                        |
| ACGTACA  | db/db2 | db/db | 497  | 0.052669 | FALSE | 27.51799 | TRUE  |                        |
| ACGTACA  | db/db2 | db/db | 281  | 0.042704 | FALSE | 54.93507 | TRUE  |                        |
| ACGTACA  | db/db2 | db/db | 1633 | 0.012052 | FALSE | 0.637723 | FALSE | Photoreceptor          |
| ACGTACA  | db/db2 | db/db | 4215 | 0.115641 | TRUE  | 1.231328 | FALSE |                        |
| ACGTAGT  | db/db2 | db/db | 481  | 0.034954 | FALSE | 13.87363 | TRUE  |                        |
| ACGTCCTA | db/db2 | db/db | 410  | 0.078788 | FALSE | 34.92064 | TRUE  |                        |
| ACGTCCTA | db/db2 | db/db | 444  | 0.025416 | FALSE | 2.738446 | FALSE | Muller cell            |
| ACGTCCTA | db/db2 | db/db | 1881 | 0.011805 | FALSE | 1.188607 | FALSE | Endothelia Capillary E |
| ACGTCCTC | db/db2 | db/db | 243  | 0.05065  | FALSE | 2.903809 | FALSE | Muller cell            |
| ACGTCCTC | db/db2 | db/db | 2428 | 0.021669 | FALSE | 1.336838 | FALSE | Endothelia Capillary E |
| ACGTCCTC | db/db2 | db/db | 4965 | 0.013074 | FALSE | 0.557553 | FALSE | Photoreceptor          |
| ACGTCCTC | db/db2 | db/db | 444  | 0.08663  | FALSE | 3.863287 | FALSE | Endothelia Capillary E |
| ACGTCCTT | db/db2 | db/db | 4608 | 0.025416 | FALSE | 0.676967 | FALSE | Photoreceptor          |
| ACGTTCCA | db/db2 | db/db | 523  | 0.024534 | FALSE | 2.335387 | FALSE | Endothelia Capillary E |
| ACGTTCCC | db/db2 | db/db | 1061 | 0.102807 | TRUE  | 3.911565 | FALSE |                        |
| ACGTTCCC | db/db2 | db/db | 2927 | 0.101906 | TRUE  | 1.957078 | FALSE |                        |
| ACTACGA  | db/db2 | db/db | 631  | 0.065957 | FALSE | 2.317568 | FALSE | Microglia              |
| ACTACGA  | db/db2 | db/db | 501  | 0.119124 | TRUE  | 31.32948 | TRUE  |                        |

|                 |       |      |          |       |          |       |                         |
|-----------------|-------|------|----------|-------|----------|-------|-------------------------|
| ACTACGAC db/db2 | db/db | 2036 | 0.101906 | TRUE  | 2.442778 | FALSE |                         |
| ACTACGAT db/db2 | db/db | 676  | 0.061912 | FALSE | 0.494958 | FALSE | Neuron                  |
| ACTACGAT db/db2 | db/db | 2096 | 0.018422 | FALSE | 1.025542 | FALSE | Photoreceptor           |
| ACTATCTG db/db2 | db/db | 389  | 0.060641 | FALSE | 5.367793 | TRUE  |                         |
| ACTATCTT db/db2 | db/db | 1909 | 0.051646 | FALSE | 1.970451 | FALSE | Photoreceptor           |
| ACTATGGT db/db2 | db/db | 596  | 0.088776 | FALSE | 2.461841 | FALSE | Endothelia Venous EC    |
| ACTATGGC db/db2 | db/db | 6065 | 0.008234 | FALSE | 1.09995  | FALSE | Neuron                  |
| ACTATGGC db/db2 | db/db | 4576 | 0.031411 | FALSE | 1.116785 | FALSE | Endothelia Venous EC    |
| ACTATGGC db/db2 | db/db | 2429 | 0.010846 | FALSE | 2.058504 | FALSE | Neuron                  |
| ACTATGGC db/db2 | db/db | 1909 | 0.016799 | FALSE | 1.273529 | FALSE | Endothelia Capillary EC |
| ACTATGGT db/db2 | db/db | 3465 | 0.037564 | FALSE | 1.20611  | FALSE | Endothelia Venous EC    |
| ACTATTCC db/db2 | db/db | 2814 | 0.038953 | FALSE | 1.106506 | FALSE | Endothelia Capillary EC |
| ACTATTCC db/db2 | db/db | 3068 | 0.107669 | TRUE  | 1.573299 | FALSE |                         |
| ACTATTCT db/db2 | db/db | 1442 | 0.027758 | FALSE | 1.100935 | FALSE | Photoreceptor           |
| ACTATTCT db/db2 | db/db | 1128 | 0.007636 | FALSE | 1.241602 | FALSE | Endothelia Capillary EC |
| ACTATTCT db/db2 | db/db | 6667 | 0.112477 | TRUE  | 3.166727 | FALSE |                         |
| ACTCCCAA db/db2 | db/db | 4397 | 0.026796 | FALSE | 1.224863 | FALSE | Endothelia Venous EC    |
| ACTCCCAA db/db2 | db/db | 461  | 0.046025 | FALSE | 4.07623  | FALSE | Muller cell             |
| ACTCCCAC db/db2 | db/db | 2467 | 0.018761 | FALSE | 1.204863 | FALSE | Endothelia Capillary EC |
| ACTCCCAC db/db2 | db/db | 927  | 0.039671 | FALSE | 0.468121 | FALSE | Photoreceptor           |
| ACTCCCAG db/db2 | db/db | 2391 | 0.010384 | FALSE | 1.120896 | FALSE | Endothelia EC-C4        |
| ACTCTCGA db/db2 | db/db | 4145 | 0.027758 | FALSE | 1.171443 | FALSE | Endothelia Capillary EC |
| ACTCTCGC db/db2 | db/db | 2713 | 0.008438 | FALSE | 0.914541 | FALSE | Endothelia Capillary EC |
| ACTCTCGT db/db2 | db/db | 427  | 0.008032 | FALSE | 1.618953 | FALSE | Photoreceptor           |
| ACTCTCGT db/db2 | db/db | 429  | 0.019455 | FALSE | 1.247518 | FALSE | Endothelia Capillary EC |
| ACTGATGC db/db2 | db/db | 344  | 0.032546 | FALSE | 42.85714 | TRUE  |                         |
| ACTGATGC db/db2 | db/db | 1152 | 0.023266 | FALSE | 0.467659 | FALSE | Photoreceptor           |
| ACTGATGC db/db2 | db/db | 512  | 0.041154 | FALSE | 52.96167 | TRUE  |                         |
| ACTGATGC db/db2 | db/db | 8989 | 0.013876 | FALSE | 0.684504 | FALSE | Photoreceptor           |
| ACTGCAA db/db2  | db/db | 2640 | 0.022857 | FALSE | 0.92375  | FALSE | Endothelia Capillary EC |
| ACTGCAA db/db2  | db/db | 883  | 0.012557 | FALSE | 0.310745 | FALSE | Photoreceptor           |
| ACTGCAA db/db2  | db/db | 6258 | 0.035586 | FALSE | 0.897062 | FALSE | Endothelia Venous EC    |
| ACTGCAAC db/db2 | db/db | 1093 | 0.012052 | FALSE | 0.379303 | FALSE | Photoreceptor           |
| ACTGCAAT db/db2 | db/db | 2678 | 0.020908 | FALSE | 1.064693 | FALSE | Endothelia EC-C4        |
| ACTGTCCA db/db2 | db/db | 4231 | 0.006137 | FALSE | 1.362897 | FALSE | Neuron                  |
| ACTGTCCC db/db2 | db/db | 2582 | 0.054795 | FALSE | 1.345948 | FALSE | Pericyte                |
| ACTGTCCC db/db2 | db/db | 1570 | 0.042704 | FALSE | 2.316611 | FALSE | Photoreceptor           |
| ACTGTCCC db/db2 | db/db | 391  | 0.058205 | FALSE | 26.97674 | TRUE  |                         |
| ACTGTCCT db/db2 | db/db | 551  | 0.103088 | TRUE  | 2.896552 | FALSE |                         |
| ACTGTGA db/db2  | db/db | 2876 | 0.048732 | FALSE | 1.605889 | FALSE | Endothelia Venous EC    |
| ACTGTGA db/db2  | db/db | 6724 | 0.017758 | FALSE | 0.291677 | FALSE | Photoreceptor           |
| ACTGTGAC db/db2 | db/db | 2180 | 0.045165 | FALSE | 0.764753 | FALSE | Photoreceptor           |
| ACTGTGAC db/db2 | db/db | 1898 | 0.073582 | FALSE | 1.534038 | FALSE | Photoreceptor           |
| ACTGTGAC db/db2 | db/db | 391  | 0.038953 | FALSE | 30.89744 | TRUE  |                         |
| ACTGTGAC db/db2 | db/db | 381  | 0.041154 | FALSE | 4.834351 | FALSE | Photoreceptor           |
| ACTGTGAT db/db2 | db/db | 3726 | 0.040404 | FALSE | 0.955596 | FALSE | Photoreceptor           |
| ACTGTGAT db/db2 | db/db | 938  | 0.014711 | FALSE | 0.507115 | FALSE | Photoreceptor           |

|          |        |       |      |          |       |          |       |                        |
|----------|--------|-------|------|----------|-------|----------|-------|------------------------|
| ACTTAGG  | db/db2 | db/db | 5369 | 0.012052 | FALSE | 1.200262 | FALSE | Photoreceptor          |
| ACTTAGG  | db/db2 | db/db | 2317 | 0.036232 | FALSE | 1.636737 | FALSE | Endothelia Capillary E |
| ACTTATCA | db/db2 | db/db | 4838 | 0.032546 | FALSE | 0.910096 | FALSE | Endothelia EC-C4       |
| ACTTATCA | db/db2 | db/db | 687  | 0.040404 | FALSE | 41.54488 | TRUE  |                        |
| ACTTATCC | db/db2 | db/db | 4763 | 0.177638 | TRUE  | 3.333066 | FALSE |                        |
| ACTTATCT | db/db2 | db/db | 1235 | 0.034334 | FALSE | 0.916064 | FALSE | Photoreceptor          |
| ACTTATCT | db/db2 | db/db | 878  | 0.05065  | FALSE | 1.21227  | FALSE | Photoreceptor          |
| ACTTCCGA | db/db2 | db/db | 394  | 0.046025 | FALSE | 33.12883 | TRUE  |                        |
| ACTTCCGC | db/db2 | db/db | 1879 | 0.022059 | FALSE | 1.612123 | FALSE | Endothelia Capillary E |
| ACTTCCGT | db/db2 | db/db | 892  | 0.016799 | FALSE | 0.537095 | FALSE | Photoreceptor          |
| ACTTCGCA | db/db2 | db/db | 1590 | 0.021286 | FALSE | 1.991563 | FALSE | Endothelia Capillary E |
| ACTTCGCA | db/db2 | db/db | 2739 | 0.031973 | FALSE | 1.978651 | FALSE | Neuron                 |
| ACTTCGCT | db/db2 | db/db | 1163 | 0.106408 | TRUE  | 15.63229 | TRUE  |                        |
| ACTTTCAC | db/db2 | db/db | 1076 | 0.034954 | FALSE | 39.61428 | TRUE  |                        |
| ACTTTCAG | db/db2 | db/db | 1257 | 0.126437 | TRUE  | 4.997707 | FALSE |                        |
| ACTTTCAG | db/db2 | db/db | 453  | 0.032546 | FALSE | 37.24066 | TRUE  |                        |
| ACTTTCAG | db/db2 | db/db | 409  | 0.011561 | FALSE | 3.288595 | FALSE | Endothelia Capillary E |
| ACTTTCAT | db/db2 | db/db | 493  | 0.04192  | FALSE | 2.966675 | FALSE | Endothelia Capillary E |
| ACTTTCAT | db/db2 | db/db | 748  | 0.036891 | FALSE | 3.991132 | FALSE | Muller cell            |
| ACTTTGTA | db/db2 | db/db | 545  | 0.028251 | FALSE | 4.686234 | FALSE | Muller cell            |
| ACTTTGTA | db/db2 | db/db | 2146 | 0.013338 | FALSE | 1.297756 | FALSE | Endothelia Capillary E |
| ACTTTGTT | db/db2 | db/db | 3832 | 0.012052 | FALSE | 1.253577 | FALSE | Photoreceptor          |
| AGAAATG  | db/db2 | db/db | 3102 | 0.046025 | FALSE | 0.895779 | FALSE | Photoreceptor          |
| AGAAATG  | db/db2 | db/db | 1290 | 0.063221 | FALSE | 1.679573 | FALSE | Photoreceptor          |
| AGAAATG  | db/db2 | db/db | 1915 | 0.075259 | FALSE | 3.04249  | FALSE | Muller cell            |
| AGAAATG  | db/db2 | db/db | 5777 | 0.023266 | FALSE | 1.10555  | FALSE | Photoreceptor          |
| AGAACAA  | db/db2 | db/db | 2167 | 0.070386 | FALSE | 1.518253 | FALSE | Photoreceptor          |
| AGAACAA  | db/db2 | db/db | 657  | 0.042704 | FALSE | 33.55971 | TRUE  |                        |
| AGAACAA  | db/db2 | db/db | 3265 | 0.027758 | FALSE | 1.38701  | FALSE | Neuron                 |
| AGAACAA  | db/db2 | db/db | 4910 | 0.013605 | FALSE | 0.906065 | FALSE | Endothelia EC-C4       |
| AGAACCT  | db/db2 | db/db | 456  | 0.042704 | FALSE | 28.29964 | TRUE  |                        |
| AGAACCT  | db/db2 | db/db | 957  | 0.007441 | FALSE | 1.447634 | FALSE | Endothelia Capillary E |
| AGAACCT  | db/db2 | db/db | 856  | 0.041154 | FALSE | 3.168696 | FALSE | Pericyte               |
| AGAACCT  | db/db2 | db/db | 2470 | 0.027758 | FALSE | 1.430974 | FALSE | Neuron                 |
| AGAAGCG  | db/db2 | db/db | 443  | 0.038251 | FALSE | 44.78022 | TRUE  |                        |
| AGAAGCG  | db/db2 | db/db | 370  | 0.055901 | FALSE | 4.948965 | FALSE | Muller cell            |
| AGAAGCG  | db/db2 | db/db | 466  | 0.04192  | FALSE | 29.51219 | TRUE  |                        |
| AGAAGTA  | db/db2 | db/db | 856  | 0.010384 | FALSE | 1.871665 | FALSE | Endothelia Capillary E |
| AGAAGTA  | db/db2 | db/db | 2346 | 0.080645 | FALSE | 1.428589 | FALSE | Photoreceptor          |
| AGAAGTA  | db/db2 | db/db | 2517 | 0.022857 | FALSE | 1.347218 | FALSE | Endothelia Capillary E |
| AGAAGTA  | db/db2 | db/db | 2253 | 0.030859 | FALSE | 1.571465 | FALSE | Photoreceptor          |
| AGACAAA  | db/db2 | db/db | 2159 | 0.047807 | FALSE | 1.194082 | FALSE | Photoreceptor          |
| AGACAAA  | db/db2 | db/db | 3830 | 0.030318 | FALSE | 0.94172  | FALSE | Endothelia EC-C4       |
| AGACAAA  | db/db2 | db/db | 2391 | 0.048732 | FALSE | 1.101291 | FALSE | Photoreceptor          |
| AGACAAA  | db/db2 | db/db | 1546 | 0.015879 | FALSE | 1.227546 | FALSE | Endothelia Capillary E |
| AGACAAA  | db/db2 | db/db | 3406 | 0.016799 | FALSE | 1.03161  | FALSE | Endothelia Aterial EC  |
| AGACACT  | db/db2 | db/db | 818  | 0.033726 | FALSE | 1.456894 | FALSE | Photoreceptor          |

|                 |       |       |          |       |          |       |                         |
|-----------------|-------|-------|----------|-------|----------|-------|-------------------------|
| AGACACTT db/db2 | db/db | 1725  | 0.08663  | FALSE | 1.743069 | FALSE | Endothelia Venous EC    |
| AGACACTT db/db2 | db/db | 429   | 0.067388 | FALSE | 46.35945 | TRUE  |                         |
| AGACAGG db/db2  | db/db | 2655  | 0.078788 | FALSE | 1.268458 | FALSE | Photoreceptor           |
| AGACCATC db/db2 | db/db | 9337  | 0.019455 | FALSE | 0.607156 | FALSE | Photoreceptor           |
| AGACCCG db/db2  | db/db | 6013  | 0.032546 | FALSE | 0.705079 | FALSE | Photoreceptor           |
| AGACCCG db/db2  | db/db | 4511  | 0.046025 | FALSE | 1.220426 | FALSE | Photoreceptor           |
| AGACTCA db/db2  | db/db | 1560  | 0.018088 | FALSE | 1.641526 | FALSE | Endothelia Capillary EC |
| AGACTCA db/db2  | db/db | 10803 | 0.164835 | TRUE  | 0.980816 | FALSE |                         |
| AGACTCAT db/db2 | db/db | 1229  | 0.040404 | FALSE | 39.78322 | TRUE  |                         |
| AGACTCAT db/db2 | db/db | 1242  | 0.049679 | FALSE | 1.620387 | FALSE | Photoreceptor           |
| AGAGAAT db/db2  | db/db | 8818  | 0.015287 | FALSE | 0.457072 | FALSE | Photoreceptor           |
| AGAGAAT db/db2  | db/db | 1281  | 0.091004 | FALSE | 1.488674 | FALSE | Photoreceptor           |
| AGAGAAT db/db2  | db/db | 480   | 0.076994 | FALSE | 20.50633 | TRUE  |                         |
| AGAGAAT db/db2  | db/db | 9329  | 0.017758 | FALSE | 0.731846 | FALSE | Photoreceptor           |
| AGAGAAT db/db2  | db/db | 3484  | 0.013605 | FALSE | 1.358761 | FALSE | Endothelia Aterial EC   |
| AGAGAAT db/db2  | db/db | 1151  | 0.052669 | FALSE | 1.669899 | FALSE | Endothelia Aterial EC   |
| AGAGAAT db/db2  | db/db | 498   | 0.119124 | TRUE  | 8.112095 | TRUE  |                         |
| AGAGAAT db/db2  | db/db | 6923  | 0.016181 | FALSE | 0.602752 | FALSE | Photoreceptor           |
| AGAGAGC db/db2  | db/db | 4868  | 0.011805 | FALSE | 1.389679 | FALSE | Photoreceptor           |
| AGAGAGC db/db2  | db/db | 5236  | 0.023266 | FALSE | 1.230548 | FALSE | Endothelia Venous EC    |
| AGAGAGC db/db2  | db/db | 2147  | 0.013605 | FALSE | 1.515875 | FALSE | Endothelia Capillary EC |
| AGAGAGC db/db2  | db/db | 2289  | 0.101906 | TRUE  | 2.415377 | FALSE |                         |
| AGAGAGC db/db2  | db/db | 1769  | 0.026796 | FALSE | 1.432809 | FALSE | Endothelia Capillary EC |
| AGAGCAG db/db2  | db/db | 1523  | 0.035586 | FALSE | 1.612727 | FALSE | Endothelia Capillary EC |
| AGAGCAG db/db2  | db/db | 3081  | 0.107669 | TRUE  | 2.199362 | FALSE |                         |
| AGAGCAG db/db2  | db/db | 2589  | 0.021286 | FALSE | 1.119479 | FALSE | Endothelia EC-C4        |
| AGAGCAG db/db2  | db/db | 422   | 0.03313  | FALSE | 1.084753 | FALSE | Photoreceptor           |
| AGAGCAG db/db2  | db/db | 3452  | 0.137569 | TRUE  | 3.94373  | FALSE |                         |
| AGAGCAG db/db2  | db/db | 919   | 0.093319 | FALSE | 1.681947 | FALSE | Photoreceptor           |
| AGAGCAG db/db2  | db/db | 2054  | 0.067388 | FALSE | 1.761065 | FALSE | Endothelia Capillary EC |
| AGAGCAG db/db2  | db/db | 3134  | 0.003803 | FALSE | 1.153286 | FALSE | Neuron                  |
| AGAGCAG db/db2  | db/db | 1128  | 0.046025 | FALSE | 1.732165 | FALSE | Muller cell             |
| AGAGCCC db/db2  | db/db | 5771  | 0.022455 | FALSE | 0.621627 | FALSE | Photoreceptor           |
| AGAGCCC db/db2  | db/db | 1438  | 0.024971 | FALSE | 42.19101 | TRUE  |                         |
| AGAGCCC db/db2  | db/db | 1995  | 0.018761 | FALSE | 1.312903 | FALSE | Endothelia Aterial EC   |
| AGAGCCC db/db2  | db/db | 2164  | 0.040404 | FALSE | 0.888563 | FALSE | Photoreceptor           |
| AGATAGA db/db2  | db/db | 2180  | 0.014429 | FALSE | 0.983004 | FALSE | Endothelia EC-C4        |
| AGATAGA db/db2  | db/db | 9043  | 0.035586 | FALSE | 0.49285  | FALSE | Photoreceptor           |
| AGATCCA db/db2  | db/db | 3602  | 0.046025 | FALSE | 1.113392 | FALSE | Photoreceptor           |
| AGATCCA db/db2  | db/db | 449   | 0.044326 | FALSE | 2.65674  | FALSE | Muller cell             |
| AGATCCA db/db2  | db/db | 1507  | 0.015879 | FALSE | 0.757524 | FALSE | Photoreceptor           |
| AGATCCA db/db2  | db/db | 1119  | 0.016181 | FALSE | 3.771969 | FALSE | Muller cell             |
| AGATCCAT db/db2 | db/db | 9348  | 0.012814 | FALSE | 0.565443 | FALSE | Photoreceptor           |
| AGATCGT db/db2  | db/db | 2652  | 0.036232 | FALSE | 1.251919 | FALSE | Photoreceptor           |
| AGATCGT db/db2  | db/db | 5842  | 0.05065  | FALSE | 0.917031 | FALSE | Photoreceptor           |
| AGATCGT db/db2  | db/db | 1035  | 0.040404 | FALSE | 0.635294 | FALSE | Photoreceptor           |
| AGATCGT db/db2  | db/db | 1254  | 0.011805 | FALSE | 1.189577 | FALSE | Endothelia Aterial EC   |

|                 |       |       |          |       |          |       |                        |
|-----------------|-------|-------|----------|-------|----------|-------|------------------------|
| AGATCGTC db/db2 | db/db | 493   | 0.078788 | FALSE | 3.419981 | FALSE | Muller cell            |
| AGATCGTC db/db2 | db/db | 870   | 0.021286 | FALSE | 2.699668 | FALSE | Endothelia Capillary E |
| AGATCGTT db/db2 | db/db | 1910  | 0.017758 | FALSE | 1.058399 | FALSE | Pericyte               |
| AGATGAA db/db2  | db/db | 3914  | 0.033726 | FALSE | 0.915706 | FALSE | Photoreceptor          |
| AGATGAA db/db2  | db/db | 6158  | 0.027758 | FALSE | 0.999845 | FALSE | Endothelia EC-C4       |
| AGATGAA db/db2  | db/db | 7149  | 0.126437 | TRUE  | 1.85599  | FALSE |                        |
| AGATGAA db/db2  | db/db | 7724  | 0.018088 | FALSE | 0.972804 | FALSE | Photoreceptor          |
| AGATGCTT db/db2 | db/db | 505   | 0.063221 | FALSE | 3.106424 | FALSE | Endothelia Capillary E |
| AGATGCTT db/db2 | db/db | 2899  | 0.016181 | FALSE | 1.060263 | FALSE | Endothelia Capillary E |
| AGCATCAC db/db2 | db/db | 9449  | 0.016799 | FALSE | 0.694251 | FALSE | Photoreceptor          |
| AGCATCAC db/db2 | db/db | 7784  | 0.035586 | FALSE | 0.875448 | FALSE | Photoreceptor          |
| AGCATCAT db/db2 | db/db | 700   | 0.019106 | FALSE | 2.861223 | FALSE | Muller cell            |
| AGCATCAT db/db2 | db/db | 4011  | 0.032546 | FALSE | 0.929985 | FALSE | Endothelia EC-C4       |
| AGCATCAT db/db2 | db/db | 3438  | 0.008234 | FALSE | 0.936494 | FALSE | Endothelia EC-C4       |
| AGCATCAT db/db2 | db/db | 8921  | 0.095727 | FALSE | 0.680862 | FALSE | Photoreceptor          |
| AGCCAAT db/db2  | db/db | 2424  | 0.007249 | FALSE | 1.262995 | FALSE | Endothelia Capillary E |
| AGCCAAT db/db2  | db/db | 6135  | 0.014151 | FALSE | 0.574146 | FALSE | Photoreceptor          |
| AGCCAATT db/db2 | db/db | 1095  | 0.025868 | FALSE | 1.408065 | FALSE | Endothelia EC-C4       |
| AGCCACG db/db2  | db/db | 173   | 0.020171 | FALSE | 65.61955 | TRUE  |                        |
| AGCCAGC db/db2  | db/db | 362   | 0.040404 | FALSE | 38.34049 | TRUE  |                        |
| AGCCAGC db/db2  | db/db | 3443  | 0.060641 | FALSE | 1.3905   | FALSE | Photoreceptor          |
| AGCCAGC db/db2  | db/db | 912   | 0.025416 | FALSE | 3.636435 | FALSE | Muller cell            |
| AGCCAGC db/db2  | db/db | 669   | 0.042704 | FALSE | 1.394212 | FALSE | Photoreceptor          |
| AGCGATT db/db2  | db/db | 2135  | 0.012557 | FALSE | 1.225574 | FALSE | Endothelia Capillary E |
| AGCGATT db/db2  | db/db | 1128  | 0.021669 | FALSE | 0.443988 | FALSE | Photoreceptor          |
| AGCGCCA db/db2  | db/db | 3198  | 0.016181 | FALSE | 0.534666 | FALSE | Photoreceptor          |
| AGCGCCA db/db2  | db/db | 2957  | 0.013605 | FALSE | 1.096325 | FALSE | Endothelia EC-C4       |
| AGCGCCA db/db2  | db/db | 1477  | 0.038953 | FALSE | 1.184467 | FALSE | Photoreceptor          |
| AGCGCCA db/db2  | db/db | 701   | 0.008644 | FALSE | 1.844423 | FALSE | Pericyte               |
| AGCGCTG db/db2  | db/db | 2707  | 0.048732 | FALSE | 1.368377 | FALSE | Endothelia Venous EC   |
| AGCGCTG db/db2  | db/db | 468   | 0.014151 | FALSE | 2.567218 | FALSE | Muller cell            |
| AGCGCTG db/db2  | db/db | 5932  | 0.022857 | FALSE | 0.736556 | FALSE | Photoreceptor          |
| AGCGCTG db/db2  | db/db | 854   | 0.058205 | FALSE | 0.972623 | FALSE | Photoreceptor          |
| AGCGCTG db/db2  | db/db | 482   | 0.019455 | FALSE | 2.800106 | FALSE | Muller cell            |
| AGCGTATC db/db2 | db/db | 2325  | 0.103567 | TRUE  | 13.95684 | TRUE  |                        |
| AGCGTATT db/db2 | db/db | 1878  | 0.023682 | FALSE | 1.408134 | FALSE | Endothelia Capillary E |
| AGCTACA db/db2  | db/db | 8444  | 0.033726 | FALSE | 0.7977   | FALSE | Photoreceptor          |
| AGCTACA db/db2  | db/db | 4672  | 0.04192  | FALSE | 1.100646 | FALSE | Endothelia Capillary E |
| AGCTACAC db/db2 | db/db | 3118  | 0.015581 | FALSE | 1.026743 | FALSE | Endothelia Venous EC   |
| AGCTACAT db/db2 | db/db | 922   | 0.019106 | FALSE | 0.639303 | FALSE | Photoreceptor          |
| AGCTACAT db/db2 | db/db | 5202  | 0.022857 | FALSE | 0.522323 | FALSE | Photoreceptor          |
| AGCTCAA db/db2  | db/db | 10073 | 0.024534 | FALSE | 0.485851 | FALSE | Photoreceptor          |
| AGCTCAAC db/db2 | db/db | 1113  | 0.038251 | FALSE | 0.776144 | FALSE | Photoreceptor          |
| AGCTCAAT db/db2 | db/db | 1413  | 0.034334 | FALSE | 2.183854 | FALSE | Endothelia Venous EC   |
| AGCTCAAT db/db2 | db/db | 6354  | 0.008234 | FALSE | 1.014622 | FALSE | Photoreceptor          |
| AGCTTCCA db/db2 | db/db | 2267  | 0.104679 | TRUE  | 2.313167 | FALSE |                        |
| AGCTTCCC db/db2 | db/db | 2978  | 0.033726 | FALSE | 0.985741 | FALSE | Endothelia EC-C4       |

|                 |       |      |          |       |          |       |                        |
|-----------------|-------|------|----------|-------|----------|-------|------------------------|
| AGCTTCCC db/db2 | db/db | 2821 | 0.027273 | FALSE | 1.051771 | FALSE | Endothelia Capillary E |
| AGCTTCCT db/db2 | db/db | 467  | 0.048732 | FALSE | 3.224805 | FALSE | Endothelia Capillary E |
| AGCTTCCT db/db2 | db/db | 530  | 0.031411 | FALSE | 2.898661 | FALSE | Neuron                 |
| AGGAAAT db/db2  | db/db | 913  | 0.065957 | FALSE | 5.648855 | TRUE  |                        |
| AGGAAAT db/db2  | db/db | 877  | 0.075259 | FALSE | 4.283126 | FALSE | Muller cell            |
| AGGAAAT db/db2  | db/db | 2531 | 0.019106 | FALSE | 1.24539  | FALSE | Endothelia Capillary E |
| AGGAAAT db/db2  | db/db | 1080 | 0.015581 | FALSE | 2.475746 | FALSE | Endothelia Capillary E |
| AGGAATA db/db2  | db/db | 3720 | 0.037564 | FALSE | 0.960101 | FALSE | Photoreceptor          |
| AGGAATA db/db2  | db/db | 720  | 0.012052 | FALSE | 0.41397  | FALSE | Pericyte               |
| AGGACGA db/db2  | db/db | 1375 | 0.023266 | FALSE | 2.514074 | FALSE | Endothelia Capillary E |
| AGGACGA db/db2  | db/db | 438  | 0.035586 | FALSE | 4.058002 | FALSE | Muller cell            |
| AGGACGA db/db2  | db/db | 2218 | 0.026328 | FALSE | 1.029547 | FALSE | Endothelia Venous EC   |
| AGGACTT db/db2  | db/db | 3761 | 0.038251 | FALSE | 1.006544 | FALSE | Photoreceptor          |
| AGGACTT db/db2  | db/db | 1689 | 0.093319 | FALSE | 5.463183 | TRUE  |                        |
| AGGACTT db/db2  | db/db | 4667 | 0.047807 | FALSE | 1.08285  | FALSE | Endothelia EC-C4       |
| AGGACTT db/db2  | db/db | 4896 | 0.030318 | FALSE | 0.914737 | FALSE | Endothelia EC-C4       |
| AGGACTT db/db2  | db/db | 4113 | 0.058205 | FALSE | 1.030176 | FALSE | Photoreceptor          |
| AGGAGGT db/db2  | db/db | 477  | 0.023266 | FALSE | 3.936253 | FALSE | Muller cell            |
| AGGAGGT db/db2  | db/db | 1766 | 0.018088 | FALSE | 1.397184 | FALSE | Endothelia Capillary E |
| AGGAGGT db/db2  | db/db | 329  | 0.022059 | FALSE | 47.92833 | TRUE  |                        |
| AGGAGGT db/db2  | db/db | 711  | 0.015581 | FALSE | 0.438782 | FALSE | Photoreceptor          |
| AGGAGGT db/db2  | db/db | 9450 | 0.018088 | FALSE | 0.549249 | FALSE | Photoreceptor          |
| AGGAGGT db/db2  | db/db | 7263 | 0.023682 | FALSE | 0.905786 | FALSE | Photoreceptor          |
| AGGATAA db/db2  | db/db | 4883 | 0.036232 | FALSE | 1.024775 | FALSE | Endothelia Venous EC   |
| AGGATAA db/db2  | db/db | 340  | 0.026328 | FALSE | 56.04187 | TRUE  |                        |
| AGGATAA db/db2  | db/db | 471  | 0.05065  | FALSE | 30.26906 | TRUE  |                        |
| AGGATCT db/db2  | db/db | 4333 | 0.017758 | FALSE | 0.843535 | FALSE | Endothelia Venous EC   |
| AGGATCT db/db2  | db/db | 428  | 0.035586 | FALSE | 42.32804 | TRUE  |                        |
| AGGATCT db/db2  | db/db | 501  | 0.020171 | FALSE | 3.40756  | FALSE | Endothelia Capillary E |
| AGGCATT db/db2  | db/db | 7017 | 0.033726 | FALSE | 0.758632 | FALSE | Photoreceptor          |
| AGGCATT db/db2  | db/db | 4871 | 0.020536 | FALSE | 0.774381 | FALSE | Photoreceptor          |
| AGGCATT db/db2  | db/db | 595  | 0.019455 | FALSE | 1.696844 | FALSE | Microglia              |
| AGGCATT db/db2  | db/db | 9211 | 0.012557 | FALSE | 0.632225 | FALSE | Photoreceptor          |
| AGGCATT db/db2  | db/db | 4552 | 0.028251 | FALSE | 0.778086 | FALSE | Photoreceptor          |
| AGGCATT db/db2  | db/db | 4923 | 0.012814 | FALSE | 0.96289  | FALSE | Endothelia Venous EC   |
| AGGCATT db/db2  | db/db | 515  | 0.059406 | FALSE | 2.012835 | FALSE | Photoreceptor          |
| AGGCCAC db/db2  | db/db | 676  | 0.035586 | FALSE | 4.864908 | FALSE | Muller cell            |
| AGGCCAC db/db2  | db/db | 2370 | 0.041154 | FALSE | 1.734165 | FALSE | Photoreceptor          |
| AGGCCAC db/db2  | db/db | 3268 | 0.114406 | TRUE  | 1.957922 | FALSE |                        |
| AGGCCAC db/db2  | db/db | 781  | 0.016799 | FALSE | 2.356098 | FALSE | Endothelia Capillary E |
| AGGCCAC db/db2  | db/db | 972  | 0.036891 | FALSE | 1.222756 | FALSE | Photoreceptor          |
| AGGCCAC db/db2  | db/db | 1614 | 0.015879 | FALSE | 0.545498 | FALSE | Photoreceptor          |
| AGGCTGC db/db2  | db/db | 805  | 0.029266 | FALSE | 0.910959 | FALSE | Photoreceptor          |
| AGGCTGC db/db2  | db/db | 1774 | 0.034954 | FALSE | 0.751567 | FALSE | Photoreceptor          |
| AGGGAGT db/db2  | db/db | 796  | 0.011561 | FALSE | 0.567782 | FALSE | Photoreceptor          |
| AGGGAGT db/db2  | db/db | 2822 | 0.05065  | FALSE | 1.206944 | FALSE | Photoreceptor          |
| AGGGAGT db/db2  | db/db | 2238 | 0.003959 | FALSE | 1.063468 | FALSE | Neuron                 |



|                |       |      |          |       |          |       |                        |
|----------------|-------|------|----------|-------|----------|-------|------------------------|
| AGGGAGT db/db2 | db/db | 716  | 0.071958 | FALSE | 13.46154 | TRUE  |                        |
| AGGGCCT db/db2 | db/db | 5333 | 0.080645 | FALSE | 0.904017 | FALSE | Photoreceptor          |
| AGGGCCT db/db2 | db/db | 4276 | 0.041154 | FALSE | 1.253418 | FALSE | Endothelia Capillary E |
| AGGGCCT db/db2 | db/db | 1715 | 0.028754 | FALSE | 0.885789 | FALSE | Photoreceptor          |
| AGGGCCT db/db2 | db/db | 796  | 0.091004 | FALSE | 2.847299 | FALSE | Muller cell            |
| AGGGCTC db/db2 | db/db | 422  | 0.130374 | TRUE  | 14.62585 | TRUE  |                        |
| AGGGCTC db/db2 | db/db | 2948 | 0.026328 | FALSE | 1.168519 | FALSE | Neuron                 |
| AGGGTCC db/db2 | db/db | 1933 | 0.028754 | FALSE | 0.915197 | FALSE | Photoreceptor          |
| AGGGTCC db/db2 | db/db | 6635 | 0.053718 | FALSE | 0.985571 | FALSE | Endothelia Venous EC   |
| AGGGTCC db/db2 | db/db | 6440 | 0.023682 | FALSE | 0.806402 | FALSE | Photoreceptor          |
| AGGGTCC db/db2 | db/db | 8551 | 0.03313  | FALSE | 0.840843 | FALSE | Photoreceptor          |
| AGGGTGA db/db2 | db/db | 690  | 0.084562 | FALSE | 2.651931 | FALSE | Muller cell            |
| AGGGTGA db/db2 | db/db | 709  | 0.017434 | FALSE | 3.366975 | FALSE | Photoreceptor          |
| AGGGTGA db/db2 | db/db | 4070 | 0.022455 | FALSE | 0.699212 | FALSE | Photoreceptor          |
| AGGGTGA db/db2 | db/db | 5591 | 0.054795 | FALSE | 1.480702 | FALSE | Neuron                 |
| AGGGTTT db/db2 | db/db | 3433 | 0.126437 | TRUE  | 4.586723 | FALSE |                        |
| AGGGTTT db/db2 | db/db | 2125 | 0.018422 | FALSE | 1.251775 | FALSE | Endothelia Capillary E |
| AGGGTTT db/db2 | db/db | 1017 | 0.01981  | FALSE | 0.711753 | FALSE | Photoreceptor          |
| AGGGTTT db/db2 | db/db | 880  | 0.064568 | FALSE | 8.943716 | TRUE  |                        |
| AGGTAGG db/db2 | db/db | 3174 | 0.032546 | FALSE | 0.750701 | FALSE | Photoreceptor          |
| AGGTAGG db/db2 | db/db | 3469 | 0.048732 | FALSE | 1.102397 | FALSE | Photoreceptor          |
| AGGTAGG db/db2 | db/db | 4919 | 0.018761 | FALSE | 0.965316 | FALSE | Endothelia Venous EC   |
| AGGTCAT db/db2 | db/db | 4334 | 0.008644 | FALSE | 0.898454 | FALSE | Endothelia EC-C4       |
| AGGTCAT db/db2 | db/db | 3193 | 0.029787 | FALSE | 0.86033  | FALSE | Photoreceptor          |
| AGGTCAT db/db2 | db/db | 2456 | 0.05065  | FALSE | 1.666273 | FALSE | Photoreceptor          |
| AGGTCAT db/db2 | db/db | 6287 | 0.029266 | FALSE | 1.448479 | FALSE | Neuron                 |
| AGGTCAT db/db2 | db/db | 7889 | 0.15354  | TRUE  | 2.332567 | FALSE |                        |
| AGGTCTA db/db2 | db/db | 1967 | 0.012557 | FALSE | 1.218997 | FALSE | Endothelia Capillary E |
| AGGTCTA db/db2 | db/db | 7455 | 0.055901 | FALSE | 0.861914 | FALSE | Photoreceptor          |
| AGGTCTA db/db2 | db/db | 3798 | 0.036891 | FALSE | 0.992195 | FALSE | Photoreceptor          |
| AGGTCTA db/db2 | db/db | 2656 | 0.126958 | TRUE  | 2.478213 | FALSE |                        |
| AGGTCTA db/db2 | db/db | 1769 | 0.070386 | FALSE | 1.903966 | FALSE | Photoreceptor          |
| AGGTCTA db/db2 | db/db | 1292 | 0.046906 | FALSE | 19.18506 | TRUE  |                        |
| AGGTCTA db/db2 | db/db | 362  | 0.019106 | FALSE | 4.893086 | FALSE | Photoreceptor          |
| AGGTGTT db/db2 | db/db | 1805 | 0.022059 | FALSE | 0.884442 | FALSE | Photoreceptor          |
| AGGTGTT db/db2 | db/db | 517  | 0.025416 | FALSE | 56.70927 | TRUE  |                        |
| AGGTGTT db/db2 | db/db | 573  | 0.028754 | FALSE | 47.61905 | TRUE  |                        |
| AGGTGTT db/db2 | db/db | 5047 | 0.045165 | FALSE | 1.088308 | FALSE | Endothelia EC-C4       |
| AGGTGTT db/db2 | db/db | 818  | 0.080645 | FALSE | 4.441422 | FALSE | Muller cell            |
| AGGTTAC db/db2 | db/db | 1813 | 0.019455 | FALSE | 0.50009  | FALSE | Photoreceptor          |
| AGGTTAC db/db2 | db/db | 2043 | 0.049679 | FALSE | 1.503912 | FALSE | Photoreceptor          |
| AGGTTAC db/db2 | db/db | 8418 | 0.020536 | FALSE | 0.882132 | FALSE | Photoreceptor          |
| AGGTTGT db/db2 | db/db | 4812 | 0.024534 | FALSE | 1.123059 | FALSE | Endothelia Capillary E |
| AGGTTGT db/db2 | db/db | 6987 | 0.029266 | FALSE | 0.717921 | FALSE | Photoreceptor          |
| AGGTTGT db/db2 | db/db | 3066 | 0.006137 | FALSE | 1.397038 | FALSE | Neuron                 |
| AGTAACC db/db2 | db/db | 468  | 0.075259 | FALSE | 42.39424 | TRUE  |                        |
| AGTAACC db/db2 | db/db | 2715 | 0.018761 | FALSE | 1.379689 | FALSE | Endothelia Capillary E |

|                 |       |      |          |       |          |       |                        |
|-----------------|-------|------|----------|-------|----------|-------|------------------------|
| AGTAACCA db/db2 | db/db | 3626 | 0.041154 | FALSE | 0.995001 | FALSE | Microglia              |
| AGTAACCC db/db2 | db/db | 3342 | 0.010846 | FALSE | 0.943793 | FALSE | Endothelia EC-C4       |
| AGTAACCC db/db2 | db/db | 372  | 0.046906 | FALSE | 4.446922 | FALSE | Muller cell            |
| AGTAACCT db/db2 | db/db | 879  | 0.024971 | FALSE | 3.068316 | FALSE | Muller cell            |
| AGTACCAC db/db2 | db/db | 1158 | 0.016181 | FALSE | 2.45419  | FALSE | Endothelia Capillary E |
| AGTACCAC db/db2 | db/db | 2366 | 0.118505 | TRUE  | 3.506788 | FALSE |                        |
| AGTACTGA db/db2 | db/db | 7916 | 0.018088 | FALSE | 0.642944 | FALSE | Photoreceptor          |
| AGTACTGC db/db2 | db/db | 1457 | 0.012557 | FALSE | 1.136755 | FALSE | Endothelia EC-C4       |
| AGTACTGC db/db2 | db/db | 2780 | 0.006317 | FALSE | 1.077996 | FALSE | Photoreceptor          |
| AGTACTGC db/db2 | db/db | 1471 | 0.015287 | FALSE | 1.27232  | FALSE | Endothelia Capillary E |
| AGTACTGC db/db2 | db/db | 519  | 0.011805 | FALSE | 4.933561 | FALSE | Muller cell            |
| AGTACTGC db/db2 | db/db | 420  | 0.015879 | FALSE | 4.338185 | FALSE | Pericyte               |
| AGTACTGT db/db2 | db/db | 2464 | 0.022857 | FALSE | 1.328816 | FALSE | Endothelia Capillary E |
| AGTAGCTA db/db2 | db/db | 846  | 0.075259 | FALSE | 20.01304 | TRUE  |                        |
| AGTAGCTA db/db2 | db/db | 3746 | 0.022857 | FALSE | 1.097698 | FALSE | Endothelia Capillary E |
| AGTAGCTA db/db2 | db/db | 4791 | 0.029266 | FALSE | 1.181312 | FALSE | Photoreceptor          |
| AGTAGCTC db/db2 | db/db | 3302 | 0.058205 | FALSE | 1.58104  | FALSE | Neuron                 |
| AGTAGCTC db/db2 | db/db | 8824 | 0.022455 | FALSE | 0.572139 | FALSE | Photoreceptor          |
| AGTAGCTC db/db2 | db/db | 470  | 0.012557 | FALSE | 3.39769  | FALSE | Muller cell            |
| AGTAGTCA db/db2 | db/db | 2019 | 0.018088 | FALSE | 1.402403 | FALSE | Endothelia Capillary E |
| AGTAGTCA db/db2 | db/db | 976  | 0.036891 | FALSE | 2.288965 | FALSE | Photoreceptor          |
| AGTAGTCC db/db2 | db/db | 6047 | 0.055901 | FALSE | 0.800668 | FALSE | Photoreceptor          |
| AGTAGTCC db/db2 | db/db | 2921 | 0.006499 | FALSE | 1.752329 | FALSE | Photoreceptor          |
| AGTAGTCC db/db2 | db/db | 1168 | 0.051646 | FALSE | 0.735665 | FALSE | Photoreceptor          |
| AGTAGTCC db/db2 | db/db | 2070 | 0.093319 | FALSE | 1.33554  | FALSE | Neuron                 |
| AGTAGTCC db/db2 | db/db | 6483 | 0.052669 | FALSE | 0.936511 | FALSE | Endothelia Venous EC   |
| AGTAGTCC db/db2 | db/db | 830  | 0.004762 | FALSE | 3.020864 | FALSE | Pericyte               |
| AGTCAACC db/db2 | db/db | 411  | 0.115723 | TRUE  | 11.68    | TRUE  |                        |
| AGTCAACC db/db2 | db/db | 5711 | 0.025416 | FALSE | 0.997095 | FALSE | Photoreceptor          |
| AGTCAACC db/db2 | db/db | 4979 | 0.059406 | FALSE | 1.019203 | FALSE | Endothelia Venous EC   |
| AGTCAACT db/db2 | db/db | 4981 | 0.034334 | FALSE | 0.839507 | FALSE | Photoreceptor          |
| AGTCAACT db/db2 | db/db | 4087 | 0.022455 | FALSE | 0.928167 | FALSE | Endothelia Venous EC   |
| AGTCACA db/db2  | db/db | 2004 | 0.015287 | FALSE | 1.249227 | FALSE | Endothelia EC-C4       |
| AGTCACAC db/db2 | db/db | 2262 | 0.024971 | FALSE | 1.363994 | FALSE | Endothelia Aterial EC  |
| AGTCACAT db/db2 | db/db | 4967 | 0.032546 | FALSE | 1.189251 | FALSE | Photoreceptor          |
| AGTCATGC db/db2 | db/db | 4201 | 0.025416 | FALSE | 1.002017 | FALSE | Photoreceptor          |
| AGTCATGC db/db2 | db/db | 1061 | 0.030318 | FALSE | 1.78974  | FALSE | Photoreceptor          |
| AGTCTCCA db/db2 | db/db | 446  | 0.019455 | FALSE | 47.1564  | TRUE  |                        |
| AGTCTCCC db/db2 | db/db | 2052 | 0.013605 | FALSE | 1.367167 | FALSE | Endothelia EC-C4       |
| AGTCTCCC db/db2 | db/db | 3633 | 0.042704 | FALSE | 0.787289 | FALSE | Photoreceptor          |
| AGTCTCCT db/db2 | db/db | 4407 | 0.015581 | FALSE | 0.951625 | FALSE | Photoreceptor          |
| AGTGACTA db/db2 | db/db | 2403 | 0.043505 | FALSE | 1.401825 | FALSE | Photoreceptor          |
| AGTGACTC db/db2 | db/db | 1584 | 0.046906 | FALSE | 1.302736 | FALSE | Photoreceptor          |
| AGTGACTT db/db2 | db/db | 5607 | 0.032546 | FALSE | 0.898995 | FALSE | Photoreceptor          |
| AGTGACTT db/db2 | db/db | 711  | 0.138889 | TRUE  | 1.964637 | FALSE |                        |
| AGTGATCT db/db2 | db/db | 378  | 0.058205 | FALSE | 31.39013 | TRUE  |                        |
| AGTGCCGA db/db2 | db/db | 2279 | 0.029266 | FALSE | 1.498541 | FALSE | Endothelia Capillary E |

|                 |       |      |          |       |          |       |                        |
|-----------------|-------|------|----------|-------|----------|-------|------------------------|
| AGTGCCG/ db/db2 | db/db | 2139 | 0.048732 | FALSE | 1.27674  | FALSE | Endothelia EC-C4       |
| AGTGCCG/ db/db2 | db/db | 5368 | 0.080645 | FALSE | 1.326239 | FALSE | Photoreceptor          |
| AGTGCCG( db/db2 | db/db | 875  | 0.060641 | FALSE | 1.306999 | FALSE | Photoreceptor          |
| AGTGTTG/ db/db2 | db/db | 2125 | 0.17103  | TRUE  | 18.22629 | TRUE  |                        |
| AGTGTTG/ db/db2 | db/db | 2128 | 0.101906 | TRUE  | 1.546478 | FALSE |                        |
| AGTGTTG/ db/db2 | db/db | 3687 | 0.052669 | FALSE | 1.590934 | FALSE | Photoreceptor          |
| AGTGTTG/ db/db2 | db/db | 4205 | 0.024534 | FALSE | 1.050297 | FALSE | Endothelia Venous EC   |
| AGTGTTG/ db/db2 | db/db | 8846 | 0.019106 | FALSE | 0.652305 | FALSE | Photoreceptor          |
| AGTGTTG( db/db2 | db/db | 5579 | 0.024971 | FALSE | 0.72771  | FALSE | Photoreceptor          |
| AGTGTTG( db/db2 | db/db | 2529 | 0.019455 | FALSE | 1.423327 | FALSE | Endothelia Capillary E |
| AGTGTTG1 db/db2 | db/db | 3372 | 0.016488 | FALSE | 1.000304 | FALSE | Endothelia Venous EC   |
| AGTTAGC/ db/db2 | db/db | 287  | 0.043505 | FALSE | 56.2249  | TRUE  |                        |
| AGTTAGC( db/db2 | db/db | 1660 | 0.055901 | FALSE | 1.263639 | FALSE | Photoreceptor          |
| AGTTAGC( db/db2 | db/db | 1068 | 0.17103  | TRUE  | 10.78591 | TRUE  |                        |
| AGTTAGC1 db/db2 | db/db | 1617 | 0.070386 | FALSE | 1.773372 | FALSE | Muller cell            |
| AGTTCCCA db/db2 | db/db | 1107 | 0.022059 | FALSE | 0.68864  | FALSE | Photoreceptor          |
| AGTTCCCA db/db2 | db/db | 3097 | 0.023682 | FALSE | 1.055982 | FALSE | Endothelia Venous EC   |
| AGTTCCCC db/db2 | db/db | 1734 | 0.016181 | FALSE | 1.211104 | FALSE | Endothelia Capillary E |
| AGTTCCCC db/db2 | db/db | 898  | 0.063221 | FALSE | 1.621371 | FALSE | Photoreceptor          |
| AGTTCCCC db/db2 | db/db | 2239 | 0.006683 | FALSE | 1.157831 | FALSE | Photoreceptor          |
| AGTTCGA/ db/db2 | db/db | 642  | 0.026796 | FALSE | 3.791691 | FALSE | Muller cell            |
| AGTTCGA( db/db2 | db/db | 4827 | 0.192271 | TRUE  | 4.945828 | FALSE |                        |
| ATACCGA/ db/db2 | db/db | 4532 | 0.013876 | FALSE | 1.01492  | FALSE | Endothelia Venous EC   |
| ATACCGA/ db/db2 | db/db | 5300 | 0.078788 | FALSE | 1.124197 | FALSE | Endothelia EC-C4       |
| ATACCGA/ db/db2 | db/db | 6387 | 0.159016 | TRUE  | 3.954958 | FALSE |                        |
| ATACCGA( db/db2 | db/db | 1588 | 0.029266 | FALSE | 2.310184 | FALSE | Photoreceptor          |
| ATACCGAT db/db2 | db/db | 8097 | 0.015879 | FALSE | 0.626927 | FALSE | Photoreceptor          |
| ATACCTTA db/db2 | db/db | 4217 | 0.05065  | FALSE | 1.140766 | FALSE | Endothelia Venous EC   |
| ATACCTTT db/db2 | db/db | 1118 | 0.070386 | FALSE | 1.160223 | FALSE | Photoreceptor          |
| ATACCTTT db/db2 | db/db | 5705 | 0.014429 | FALSE | 0.495535 | FALSE | Photoreceptor          |
| ATACCTTT db/db2 | db/db | 391  | 0.063221 | FALSE | 2.715009 | FALSE | Neuron                 |
| ATACCTTT db/db2 | db/db | 1350 | 0.028754 | FALSE | 0.524125 | FALSE | Photoreceptor          |
| ATACTTCA db/db2 | db/db | 2200 | 0.009712 | FALSE | 1.353172 | FALSE | Pericyte               |
| ATACTTCC db/db2 | db/db | 1539 | 0.05065  | FALSE | 1.607785 | FALSE | Photoreceptor          |
| ATACTTCC db/db2 | db/db | 6126 | 0.018761 | FALSE | 0.926555 | FALSE | Photoreceptor          |
| ATACTTCG db/db2 | db/db | 1243 | 0.024105 | FALSE | 1.836589 | FALSE | Endothelia Capillary E |
| ATACTTCG db/db2 | db/db | 380  | 0.082569 | FALSE | 2.960336 | FALSE | Photoreceptor          |
| ATACTTCG db/db2 | db/db | 2250 | 0.036891 | FALSE | 1.646852 | FALSE | Endothelia Capillary E |
| ATACTTCT db/db2 | db/db | 700  | 0.093319 | FALSE | 3.204854 | FALSE | Pericyte               |
| ATAGACC/ db/db2 | db/db | 885  | 0.025416 | FALSE | 2.155648 | FALSE | Muller cell            |
| ATAGACC/ db/db2 | db/db | 370  | 0.055901 | FALSE | 40.72229 | TRUE  |                        |
| ATAGACCC db/db2 | db/db | 2239 | 0.005782 | FALSE | 0.897859 | FALSE | Neuron                 |
| ATAGACCC db/db2 | db/db | 2666 | 0.177638 | TRUE  | 7.383225 | TRUE  |                        |
| ATAGACCC db/db2 | db/db | 3820 | 0.015287 | FALSE | 1.233643 | FALSE | Photoreceptor          |
| ATAGACCT db/db2 | db/db | 1234 | 0.024534 | FALSE | 0.944636 | FALSE | Photoreceptor          |
| ATAGACCT db/db2 | db/db | 2322 | 0.040404 | FALSE | 1.303833 | FALSE | Photoreceptor          |
| ATAGAGA/ db/db2 | db/db | 315  | 0.054795 | FALSE | 51.38191 | TRUE  |                        |

|          |        |       |      |          |       |          |       |                        |
|----------|--------|-------|------|----------|-------|----------|-------|------------------------|
| ATAGAGA  | db/db2 | db/db | 4074 | 0.091004 | FALSE | 1.221926 | FALSE | Neuron                 |
| ATAGAGA  | db/db2 | db/db | 674  | 0.038251 | FALSE | 2.35718  | FALSE | Endothelia Capillary E |
| ATAGGCT  | db/db2 | db/db | 1146 | 0.029266 | FALSE | 2.375051 | FALSE | Endothelia Capillary E |
| ATAGGCT  | db/db2 | db/db | 3208 | 0.065957 | FALSE | 1.180763 | FALSE | Neuron                 |
| ATAGGCT  | db/db2 | db/db | 422  | 0.052669 | FALSE | 4.649098 | FALSE | Muller cell            |
| ATATCCTA | db/db2 | db/db | 1149 | 0.031411 | FALSE | 1.504544 | FALSE | Photoreceptor          |
| ATATCCTC | db/db2 | db/db | 1942 | 0.053718 | FALSE | 1.450695 | FALSE | Photoreceptor          |
| ATATCCTG | db/db2 | db/db | 1373 | 0.070386 | FALSE | 0.969075 | FALSE | Photoreceptor          |
| ATCACAG  | db/db2 | db/db | 5488 | 0.023682 | FALSE | 0.831852 | FALSE | Photoreceptor          |
| ATCACAG  | db/db2 | db/db | 2670 | 0.031411 | FALSE | 1.459897 | FALSE | Neuron                 |
| ATCACAG  | db/db2 | db/db | 4902 | 0.153234 | TRUE  | 1.693604 | FALSE |                        |
| ATCACAG  | db/db2 | db/db | 426  | 0.080645 | FALSE | 37.2035  | TRUE  |                        |
| ATCACAGT | db/db2 | db/db | 4241 | 0.024971 | FALSE | 1.091718 | FALSE | Photoreceptor          |
| ATCACGAC | db/db2 | db/db | 1689 | 0.017114 | FALSE | 1.226313 | FALSE | Endothelia Capillary E |
| ATCACGAC | db/db2 | db/db | 8664 | 0.027758 | FALSE | 0.641263 | FALSE | Photoreceptor          |
| ATCACGAC | db/db2 | db/db | 4178 | 0.011805 | FALSE | 1.133392 | FALSE | Endothelia Capillary E |
| ATCACTTA | db/db2 | db/db | 5289 | 0.012303 | FALSE | 0.71871  | FALSE | Endothelia EC-C4       |
| ATCACTTC | db/db2 | db/db | 2518 | 0.04192  | FALSE | 1.248269 | FALSE | Endothelia Capillary E |
| ATCAGGT  | db/db2 | db/db | 1840 | 0.026328 | FALSE | 1.854909 | FALSE | Pericyte               |
| ATCAGGT  | db/db2 | db/db | 8395 | 0.17103  | TRUE  | 2.147586 | FALSE |                        |
| ATCAGGT  | db/db2 | db/db | 477  | 0.009493 | FALSE | 2.740307 | FALSE | Endothelia Capillary E |
| ATCAGGT  | db/db2 | db/db | 1826 | 0.034954 | FALSE | 0.410932 | FALSE | Photoreceptor          |
| ATCAGGT  | db/db2 | db/db | 2378 | 0.020536 | FALSE | 0.687705 | FALSE | Photoreceptor          |
| ATCATTCG | db/db2 | db/db | 3831 | 0.010384 | FALSE | 1.281016 | FALSE | Photoreceptor          |
| ATCCACCA | db/db2 | db/db | 537  | 0.093319 | FALSE | 8.561236 | TRUE  |                        |
| ATCCACCC | db/db2 | db/db | 3801 | 0.080645 | FALSE | 1.359851 | FALSE | Photoreceptor          |
| ATCCATTA | db/db2 | db/db | 6760 | 0.029266 | FALSE | 0.862626 | FALSE | Photoreceptor          |
| ATCCATTC | db/db2 | db/db | 8073 | 0.020908 | FALSE | 0.749991 | FALSE | Photoreceptor          |
| ATCCATTG | db/db2 | db/db | 1953 | 0.078788 | FALSE | 3.502895 | FALSE | Muller cell            |
| ATCCATTG | db/db2 | db/db | 2008 | 0.042704 | FALSE | 1.766743 | FALSE | Photoreceptor          |
| ATCCCTGC | db/db2 | db/db | 1093 | 0.024534 | FALSE | 0.759887 | FALSE | Photoreceptor          |
| ATCCCTGC | db/db2 | db/db | 2522 | 0.028754 | FALSE | 2.737954 | FALSE | Muller cell            |
| ATCCCTGC | db/db2 | db/db | 7783 | 0.026796 | FALSE | 0.840333 | FALSE | Photoreceptor          |
| ATCCCTGC | db/db2 | db/db | 1356 | 0.093319 | FALSE | 8.448815 | TRUE  |                        |
| ATCCGTCA | db/db2 | db/db | 1572 | 0.024105 | FALSE | 0.968066 | FALSE | Photoreceptor          |
| ATCCGTCA | db/db2 | db/db | 593  | 0.024105 | FALSE | 3.18079  | FALSE | Muller cell            |
| ATCCGTCT | db/db2 | db/db | 3955 | 0.04192  | FALSE | 1.354889 | FALSE | Photoreceptor          |
| ATCCGTCT | db/db2 | db/db | 4932 | 0.019455 | FALSE | 0.987837 | FALSE | Photoreceptor          |
| ATCCGTCT | db/db2 | db/db | 3702 | 0.028754 | FALSE | 0.908594 | FALSE | Photoreceptor          |
| ATCCGTCT | db/db2 | db/db | 5332 | 0.031973 | FALSE | 0.835594 | FALSE | Photoreceptor          |
| ATCCTATA | db/db2 | db/db | 8585 | 0.017114 | FALSE | 0.559471 | FALSE | Photoreceptor          |
| ATCCTATA | db/db2 | db/db | 1960 | 0.014151 | FALSE | 1.003824 | FALSE | Endothelia EC-C4       |
| ATCCTATA | db/db2 | db/db | 7197 | 0.148377 | TRUE  | 1.87942  | FALSE |                        |
| ATCCTATG | db/db2 | db/db | 535  | 0.028754 | FALSE | 2.009523 | FALSE | Endothelia Capillary E |
| ATCGATG  | db/db2 | db/db | 3754 | 0.025868 | FALSE | 1.278384 | FALSE | Endothelia Venous EC   |
| ATCGATG  | db/db2 | db/db | 7761 | 0.016799 | FALSE | 0.787414 | FALSE | Photoreceptor          |
| ATCGATG  | db/db2 | db/db | 2550 | 0.053718 | FALSE | 1.541916 | FALSE | Photoreceptor          |

|                 |       |      |          |       |          |       |                        |
|-----------------|-------|------|----------|-------|----------|-------|------------------------|
| ATCGATGT db/db2 | db/db | 2435 | 0.01981  | FALSE | 1.157508 | FALSE | Endothelia Aterial EC  |
| ATCGCCTA db/db2 | db/db | 1377 | 0.051646 | FALSE | 1.713346 | FALSE | Muller cell            |
| ATCGCCTA db/db2 | db/db | 1855 | 0.040404 | FALSE | 1.28963  | FALSE | Endothelia Capillary E |
| ATCGCCTC db/db2 | db/db | 1535 | 0.130259 | TRUE  | 2.420929 | FALSE |                        |
| ATCGCCTG db/db2 | db/db | 1665 | 0.024534 | FALSE | 0.872596 | FALSE | Photoreceptor          |
| ATCGGATC db/db2 | db/db | 1265 | 0.024534 | FALSE | 0.721277 | FALSE | Photoreceptor          |
| ATCGGATC db/db2 | db/db | 2996 | 0.018422 | FALSE | 1.160511 | FALSE | Endothelia Capillary E |
| ATCGGATC db/db2 | db/db | 2289 | 0.007249 | FALSE | 1.197068 | FALSE | Endothelia Capillary E |
| ATCGGATC db/db2 | db/db | 762  | 0.084562 | FALSE | 6.594324 | TRUE  |                        |
| ATCGGATT db/db2 | db/db | 1509 | 0.016799 | FALSE | 0.39153  | FALSE | Photoreceptor          |
| ATCGGATT db/db2 | db/db | 1855 | 0.013074 | FALSE | 1.102974 | FALSE | Endothelia EC-C4       |
| ATCGGCGC db/db2 | db/db | 448  | 0.03313  | FALSE | 3.429322 | FALSE | Muller cell            |
| ATCGGCGC db/db2 | db/db | 4703 | 0.018761 | FALSE | 0.990546 | FALSE | Endothelia Venous EC   |
| ATCGTAGA db/db2 | db/db | 392  | 0.006683 | FALSE | 0.479121 | FALSE | Photoreceptor          |
| ATCGTAGA db/db2 | db/db | 3858 | 0.029266 | FALSE | 1.383415 | FALSE | Endothelia Capillary E |
| ATCGTAGT db/db2 | db/db | 1810 | 0.008234 | FALSE | 0.978725 | FALSE | Endothelia Capillary E |
| ATCGTAGT db/db2 | db/db | 2561 | 0.071958 | FALSE | 1.216946 | FALSE | Microglia              |
| ATCGTCCA db/db2 | db/db | 624  | 0.075259 | FALSE | 4.12431  | FALSE | Muller cell            |
| ATCGTCCA db/db2 | db/db | 760  | 0.029787 | FALSE | 1.097668 | FALSE | Photoreceptor          |
| ATCGTCCC db/db2 | db/db | 1081 | 0.021286 | FALSE | 1.53506  | FALSE | Photoreceptor          |
| ATCGTCCC db/db2 | db/db | 4489 | 0.044326 | FALSE | 1.276904 | FALSE | Endothelia EC-C4       |
| ATCGTCCC db/db2 | db/db | 760  | 0.088776 | FALSE | 9.302325 | TRUE  |                        |
| ATCGTCCC db/db2 | db/db | 2722 | 0.034954 | FALSE | 1.113466 | FALSE | Photoreceptor          |
| ATCGTCCG db/db2 | db/db | 3406 | 0.042704 | FALSE | 1.161632 | FALSE | Photoreceptor          |
| ATCGTCCT db/db2 | db/db | 2399 | 0.018422 | FALSE | 1.318271 | FALSE | Endothelia Capillary E |
| ATCGTGAC db/db2 | db/db | 4770 | 0.018761 | FALSE | 0.412166 | FALSE | Photoreceptor          |
| ATCGTGAC db/db2 | db/db | 816  | 0.017434 | FALSE | 5.777055 | TRUE  |                        |
| ATCGTGAC db/db2 | db/db | 381  | 0.030318 | FALSE | 12.87313 | TRUE  |                        |
| ATCGTGAC db/db2 | db/db | 1598 | 0.019455 | FALSE | 1.183463 | FALSE | Endothelia Capillary E |
| ATCGTGAT db/db2 | db/db | 1504 | 0.04192  | FALSE | 1.271218 | FALSE | Endothelia Capillary E |
| ATCGTGAT db/db2 | db/db | 3128 | 0.020908 | FALSE | 1.42934  | FALSE | Endothelia Aterial EC  |
| ATCTCTAA db/db2 | db/db | 2933 | 0.020171 | FALSE | 0.526167 | FALSE | Photoreceptor          |
| ATCTCTAA db/db2 | db/db | 9137 | 0.017114 | FALSE | 0.771149 | FALSE | Photoreceptor          |
| ATCTCTAA db/db2 | db/db | 2117 | 0.038251 | FALSE | 1.070164 | FALSE | Endothelia Capillary E |
| ATCTCTAC db/db2 | db/db | 1413 | 0.039671 | FALSE | 1.652847 | FALSE | Photoreceptor          |
| ATCTCTAG db/db2 | db/db | 8970 | 0.016488 | FALSE | 0.603444 | FALSE | Photoreceptor          |
| ATCTCTAG db/db2 | db/db | 8431 | 0.13452  | TRUE  | 2.427853 | FALSE |                        |
| ATCTCTAG db/db2 | db/db | 1860 | 0.382671 | TRUE  | 17.83394 | TRUE  |                        |
| ATCTTCAA db/db2 | db/db | 6821 | 0.019455 | FALSE | 0.762497 | FALSE | Photoreceptor          |
| ATCTTCAC db/db2 | db/db | 1227 | 0.018422 | FALSE | 0.757226 | FALSE | Photoreceptor          |
| ATCTTCAC db/db2 | db/db | 1044 | 0.070386 | FALSE | 15.90266 | TRUE  |                        |
| ATCTTCAG db/db2 | db/db | 495  | 0.020171 | FALSE | 39.31997 | TRUE  |                        |
| ATCTTCAT db/db2 | db/db | 3658 | 0.013338 | FALSE | 0.369251 | FALSE | Photoreceptor          |
| ATGAAAGC db/db2 | db/db | 421  | 0.035586 | FALSE | 0.908927 | FALSE | Photoreceptor          |
| ATGAAAGC db/db2 | db/db | 494  | 0.101906 | TRUE  | 1.380368 | FALSE |                        |
| ATGAAAGC db/db2 | db/db | 827  | 0.034954 | FALSE | 3.497667 | FALSE | Pericyte               |
| ATGAAAGC db/db2 | db/db | 2127 | 0.025868 | FALSE | 0.630117 | FALSE | Photoreceptor          |

|                 |       |      |          |       |          |       |                        |
|-----------------|-------|------|----------|-------|----------|-------|------------------------|
| ATGACCA# db/db2 | db/db | 415  | 0.15354  | TRUE  | 13.5514  | TRUE  |                        |
| ATGACCA# db/db2 | db/db | 2976 | 0.008852 | FALSE | 1.247152 | FALSE | Photoreceptor          |
| ATGACCA# db/db2 | db/db | 1699 | 0.043505 | FALSE | 1.296593 | FALSE | Endothelia EC-C4       |
| ATGACCAC db/db2 | db/db | 9072 | 0.038251 | FALSE | 0.809473 | FALSE | Photoreceptor          |
| ATGAGGG. db/db2 | db/db | 1521 | 0.017758 | FALSE | 1.207127 | FALSE | Endothelia EC-C4       |
| ATGAGGG. db/db2 | db/db | 1267 | 0.042704 | FALSE | 55.09601 | TRUE  |                        |
| ATGAGGG. db/db2 | db/db | 5242 | 0.061912 | FALSE | 0.953509 | FALSE | Endothelia Venous EC   |
| ATGAGGG. db/db2 | db/db | 909  | 0.008438 | FALSE | 1.225607 | FALSE | Endothelia EC-C4       |
| ATGAGGG. db/db2 | db/db | 1557 | 0.076994 | FALSE | 16.87255 | TRUE  |                        |
| ATGAGGG. db/db2 | db/db | 3434 | 0.029266 | FALSE | 1.014233 | FALSE | Endothelia EC-C4       |
| ATGAGTCC db/db2 | db/db | 682  | 0.013605 | FALSE | 2.132595 | FALSE | Endothelia Capillary E |
| ATGAGTCC db/db2 | db/db | 2771 | 0.052669 | FALSE | 1.552926 | FALSE | Photoreceptor          |
| ATGAGTCC db/db2 | db/db | 1280 | 0.03313  | FALSE | 0.710601 | FALSE | Photoreceptor          |
| ATGAGTCC db/db2 | db/db | 484  | 0.070386 | FALSE | 18.66502 | TRUE  |                        |
| ATGAGTCC db/db2 | db/db | 1058 | 0.028754 | FALSE | 1.242051 | FALSE | Endothelia Aterial EC  |
| ATGAGTCC db/db2 | db/db | 3353 | 0.028754 | FALSE | 0.813978 | FALSE | Photoreceptor          |
| ATGAGTCT db/db2 | db/db | 1068 | 0.071958 | FALSE | 1.004992 | FALSE | Photoreceptor          |
| ATGATCG( db/db2 | db/db | 328  | 0.027758 | FALSE | 30.97826 | TRUE  |                        |
| ATGATCGI db/db2 | db/db | 1977 | 0.024105 | FALSE | 0.712863 | FALSE | Photoreceptor          |
| ATGCATG# db/db2 | db/db | 493  | 0.045165 | FALSE | 35.04532 | TRUE  |                        |
| ATGCATG( db/db2 | db/db | 1126 | 0.004275 | FALSE | 1.120708 | FALSE | Endothelia Capillary E |
| ATGCATGI db/db2 | db/db | 2295 | 0.061912 | FALSE | 1.487852 | FALSE | Endothelia EC-C4       |
| ATGCCTCA db/db2 | db/db | 1239 | 0.013605 | FALSE | 0.898336 | FALSE | Endothelia Capillary E |
| ATGCCTCC db/db2 | db/db | 5453 | 0.051646 | FALSE | 1.165019 | FALSE | Photoreceptor          |
| ATGCCTCC db/db2 | db/db | 683  | 0.014429 | FALSE | 2.851936 | FALSE | Photoreceptor          |
| ATGCCTCC db/db2 | db/db | 3808 | 0.021286 | FALSE | 1.158056 | FALSE | Endothelia EC-C4       |
| ATGCCTCT db/db2 | db/db | 891  | 0.034334 | FALSE | 2.281576 | FALSE | Endothelia Capillary E |
| ATGCGAT( db/db2 | db/db | 5856 | 0.014151 | FALSE | 0.537589 | FALSE | Photoreceptor          |
| ATGCGATI db/db2 | db/db | 1065 | 0.014711 | FALSE | 1.546346 | FALSE | Endothelia Capillary E |
| ATGCGATI db/db2 | db/db | 829  | 0.159016 | TRUE  | 16.05114 | TRUE  |                        |
| ATGGAGG. db/db2 | db/db | 879  | 0.015287 | FALSE | 1.597276 | FALSE | Muller cell            |
| ATGGAGG. db/db2 | db/db | 4126 | 0.061912 | FALSE | 1.206139 | FALSE | Photoreceptor          |
| ATGGAGG. db/db2 | db/db | 9583 | 0.013338 | FALSE | 0.514558 | FALSE | Photoreceptor          |
| ATGGAGG. db/db2 | db/db | 916  | 0.029266 | FALSE | 4.963856 | FALSE | Muller cell            |
| ATGGAGG. db/db2 | db/db | 3061 | 0.026796 | FALSE | 1.139081 | FALSE | Endothelia EC-C4       |
| ATGGAGG. db/db2 | db/db | 3570 | 0.038251 | FALSE | 1.129641 | FALSE | Microglia              |
| ATGGAGG. db/db2 | db/db | 4256 | 0.013876 | FALSE | 1.182724 | FALSE | Endothelia EC-C4       |
| ATGGATCC db/db2 | db/db | 2788 | 0.107669 | TRUE  | 1.311673 | FALSE |                        |
| ATGGATCC db/db2 | db/db | 805  | 0.017758 | FALSE | 0.577639 | FALSE | Photoreceptor          |
| ATGGATCT db/db2 | db/db | 792  | 0.016488 | FALSE | 1.038948 | FALSE | Endothelia EC-C4       |
| ATGGGAG. db/db2 | db/db | 595  | 0.025868 | FALSE | 2.948737 | FALSE | Photoreceptor          |
| ATGGGAG. db/db2 | db/db | 2007 | 0.046025 | FALSE | 1.729203 | FALSE | Photoreceptor          |
| ATGGGAG. db/db2 | db/db | 1126 | 0.048732 | FALSE | 2.781528 | FALSE | Muller cell            |
| ATGGGAG. db/db2 | db/db | 416  | 0.080645 | FALSE | 12.02749 | TRUE  |                        |
| ATGGGAG. db/db2 | db/db | 4333 | 0.024534 | FALSE | 0.76006  | FALSE | Photoreceptor          |
| ATGGGAG. db/db2 | db/db | 3055 | 0.053718 | FALSE | 1.257443 | FALSE | Photoreceptor          |
| ATGGGAG. db/db2 | db/db | 1415 | 0.008234 | FALSE | 1.510819 | FALSE | Endothelia Capillary E |

|                 |       |      |          |       |          |       |                        |
|-----------------|-------|------|----------|-------|----------|-------|------------------------|
| ATGGGTTA db/db2 | db/db | 428  | 0.017114 | FALSE | 3.385174 | FALSE | Endothelia Capillary E |
| ATGGGTTG db/db2 | db/db | 8648 | 0.014429 | FALSE | 0.615354 | FALSE | Photoreceptor          |
| ATGGGTTG db/db2 | db/db | 5596 | 0.131994 | TRUE  | 1.659198 | FALSE |                        |
| ATGGGTTG db/db2 | db/db | 5160 | 0.014151 | FALSE | 1.205635 | FALSE | Photoreceptor          |
| ATGGGTTT db/db2 | db/db | 2708 | 0.022059 | FALSE | 0.52812  | FALSE | Photoreceptor          |
| ATGGGTTT db/db2 | db/db | 1489 | 0.060641 | FALSE | 2.084733 | FALSE | Photoreceptor          |
| ATGGTTG1 db/db2 | db/db | 1060 | 0.011561 | FALSE | 0.165942 | FALSE | Pericyte               |
| ATGGTTG1 db/db2 | db/db | 3803 | 0.033726 | FALSE | 1.132228 | FALSE | Photoreceptor          |
| ATGTCCCA db/db2 | db/db | 8015 | 0.038251 | FALSE | 0.829909 | FALSE | Photoreceptor          |
| ATGTCCCA db/db2 | db/db | 4496 | 0.014151 | FALSE | 0.898841 | FALSE | Endothelia Venous EC   |
| ATGTCCCA db/db2 | db/db | 7969 | 0.018761 | FALSE | 0.718184 | FALSE | Photoreceptor          |
| ATGTCCCC db/db2 | db/db | 404  | 0.035586 | FALSE | 40.70295 | TRUE  |                        |
| ATGTCCCT db/db2 | db/db | 1125 | 0.057037 | FALSE | 0.82281  | FALSE | Neuron                 |
| ATGTCCCT db/db2 | db/db | 941  | 0.125386 | TRUE  | 4.412576 | FALSE |                        |
| ATGTCTTA db/db2 | db/db | 729  | 0.075259 | FALSE | 25.76295 | TRUE  |                        |
| ATGTCTTA db/db2 | db/db | 3480 | 0.05065  | FALSE | 0.774282 | FALSE | Photoreceptor          |
| ATGTCTTG db/db2 | db/db | 2546 | 0.084562 | FALSE | 1.511482 | FALSE | Endothelia Capillary E |
| ATGTCTTG db/db2 | db/db | 567  | 0.019455 | FALSE | 3.051343 | FALSE | Endothelia Capillary E |
| ATGTCTTT db/db2 | db/db | 979  | 0.038251 | FALSE | 45.72619 | TRUE  |                        |
| ATTACCTA db/db2 | db/db | 2360 | 0.022857 | FALSE | 1.230112 | FALSE | Endothelia Aterial EC  |
| ATTACCTC db/db2 | db/db | 1022 | 0.059406 | FALSE | 1.628109 | FALSE | Photoreceptor          |
| ATTACCTG db/db2 | db/db | 4487 | 0.018422 | FALSE | 0.585654 | FALSE | Photoreceptor          |
| ATTACCTT db/db2 | db/db | 2974 | 0.028754 | FALSE | 1.001116 | FALSE | Endothelia Capillary E |
| ATTACTCA db/db2 | db/db | 6665 | 0.01981  | FALSE | 0.60007  | FALSE | Photoreceptor          |
| ATTACTCA db/db2 | db/db | 1670 | 0.021286 | FALSE | 2.023515 | FALSE | Endothelia Capillary E |
| ATTACTCA db/db2 | db/db | 475  | 0.032546 | FALSE | 4.746694 | FALSE | Muller cell            |
| ATTACTCG db/db2 | db/db | 2488 | 0.076994 | FALSE | 1.303548 | FALSE | Endothelia Venous EC   |
| ATTATCCA db/db2 | db/db | 3743 | 0.020171 | FALSE | 0.947125 | FALSE | Photoreceptor          |
| ATTATCCA db/db2 | db/db | 2030 | 0.020908 | FALSE | 1.50346  | FALSE | Endothelia Capillary E |
| ATTATCCA db/db2 | db/db | 4499 | 0.057037 | FALSE | 0.781525 | FALSE | Endothelia Venous EC   |
| ATTATCCC db/db2 | db/db | 674  | 0.057037 | FALSE | 3.675787 | FALSE | Muller cell            |
| ATTATCCG db/db2 | db/db | 1651 | 0.012814 | FALSE | 0.644799 | FALSE | Endothelia Aterial EC  |
| ATTCACTA db/db2 | db/db | 3188 | 0.075259 | FALSE | 1.277921 | FALSE | Endothelia Venous EC   |
| ATTCACTA db/db2 | db/db | 3806 | 0.109375 | TRUE  | 13.46325 | TRUE  |                        |
| ATTCACTT db/db2 | db/db | 2843 | 0.010157 | FALSE | 0.939073 | FALSE | Endothelia Venous EC   |
| ATTCACTT db/db2 | db/db | 8155 | 0.038251 | FALSE | 0.829524 | FALSE | Photoreceptor          |
| ATTCACTT db/db2 | db/db | 2745 | 0.025416 | FALSE | 1.817153 | FALSE | Neuron                 |
| ATTCACTT db/db2 | db/db | 3569 | 0.009493 | FALSE | 0.97564  | FALSE | Endothelia Venous EC   |
| ATTCAGGA db/db2 | db/db | 334  | 0.034954 | FALSE | 52.44957 | TRUE  |                        |
| ATTCAGGA db/db2 | db/db | 7342 | 0.067388 | FALSE | 0.724751 | FALSE | Photoreceptor          |
| ATTCAGGC db/db2 | db/db | 6072 | 0.018761 | FALSE | 0.739739 | FALSE | Photoreceptor          |
| ATTCAGGT db/db2 | db/db | 2618 | 0.088776 | FALSE | 1.135697 | FALSE | Endothelia Capillary E |
| ATTCATCA db/db2 | db/db | 8583 | 0.014429 | FALSE | 0.438851 | FALSE | Photoreceptor          |
| ATTCATCC db/db2 | db/db | 1172 | 0.055901 | FALSE | 9.032891 | TRUE  |                        |
| ATTCATCG db/db2 | db/db | 1102 | 0.055901 | FALSE | 1.12154  | FALSE | Endothelia Venous EC   |
| ATTCATCT db/db2 | db/db | 5360 | 0.051646 | FALSE | 0.870313 | FALSE | Endothelia EC-C4       |
| ATTCATA db/db2  | db/db | 1966 | 0.078788 | FALSE | 14.04508 | TRUE  |                        |

|                  |       |       |          |       |          |       |                        |
|------------------|-------|-------|----------|-------|----------|-------|------------------------|
| ATTCCATA db/db2  | db/db | 4482  | 0.011319 | FALSE | 1.18367  | FALSE | Photoreceptor          |
| ATTCCATA db/db2  | db/db | 512   | 0.031973 | FALSE | 2.04264  | FALSE | Microglia              |
| ATTCCATC db/db2  | db/db | 4247  | 0.044326 | FALSE | 1.075617 | FALSE | Photoreceptor          |
| ATTCCATC db/db2  | db/db | 2441  | 0.013074 | FALSE | 1.439781 | FALSE | Endothelia Aterial EC  |
| ATTCCATT db/db2  | db/db | 4746  | 0.013605 | FALSE | 0.408221 | FALSE | Photoreceptor          |
| ATTCCCGA db/db2  | db/db | 3363  | 0.048732 | FALSE | 1.82302  | FALSE | Photoreceptor          |
| ATTCCCGC db/db2  | db/db | 3393  | 0.018088 | FALSE | 0.914548 | FALSE | Endothelia EC-C4       |
| ATTCCCGC db/db2  | db/db | 1416  | 0.045165 | FALSE | 2.081323 | FALSE | Photoreceptor          |
| ATTCCCGC db/db2  | db/db | 1959  | 0.026796 | FALSE | 1.688498 | FALSE | Endothelia Capillary E |
| ATTCCCGT db/db2  | db/db | 449   | 0.032546 | FALSE | 3.214672 | FALSE | Muller cell            |
| ATTCCCGT db/db2  | db/db | 2472  | 0.014429 | FALSE | 1.169096 | FALSE | Photoreceptor          |
| ATTCCCGT db/db2  | db/db | 1584  | 0.030318 | FALSE | 0.380526 | FALSE | Photoreceptor          |
| ATTCCCTAC db/db2 | db/db | 359   | 0.007058 | FALSE | 4.342087 | FALSE | Pericyte               |
| ATTCCCTAG db/db2 | db/db | 5548  | 0.013338 | FALSE | 0.591136 | FALSE | Photoreceptor          |
| ATTCCGTTA db/db2 | db/db | 9237  | 0.020908 | FALSE | 0.499843 | FALSE | Photoreceptor          |
| ATTCCGTTC db/db2 | db/db | 537   | 0.042704 | FALSE | 44.85597 | TRUE  |                        |
| ATTCCGTTT db/db2 | db/db | 642   | 0.031411 | FALSE | 2.961215 | FALSE | Photoreceptor          |
| ATTCTACA db/db2  | db/db | 3627  | 0.060641 | FALSE | 1.662065 | FALSE | Endothelia Venous EC   |
| ATTCTACG db/db2  | db/db | 6637  | 0.038251 | FALSE | 0.911921 | FALSE | Photoreceptor          |
| ATTCTACT db/db2  | db/db | 1789  | 0.040404 | FALSE | 0.726805 | FALSE | Microglia              |
| ATTCTACT db/db2  | db/db | 2034  | 0.024105 | FALSE | 1.438136 | FALSE | Endothelia Capillary E |
| ATTCTTGC db/db2  | db/db | 487   | 0.093319 | FALSE | 1.551024 | FALSE | Muller cell            |
| ATTCTTGC db/db2  | db/db | 8203  | 0.014711 | FALSE | 0.483472 | FALSE | Photoreceptor          |
| ATTCTTGG db/db2  | db/db | 5550  | 0.025416 | FALSE | 0.531968 | FALSE | Photoreceptor          |
| ATTCTTGG db/db2  | db/db | 6578  | 0.045165 | FALSE | 1.010524 | FALSE | Photoreceptor          |
| ATTCTTGG db/db2  | db/db | 1828  | 0.073582 | FALSE | 1.406789 | FALSE | Photoreceptor          |
| ATTCTTGG db/db2  | db/db | 1940  | 0.025416 | FALSE | 1.067155 | FALSE | Photoreceptor          |
| ATTCTTGT db/db2  | db/db | 6214  | 0.037564 | FALSE | 1.00383  | FALSE | Endothelia Venous EC   |
| ATTCTTGT db/db2  | db/db | 2517  | 0.109795 | TRUE  | 3.749458 | FALSE |                        |
| ATTGGGT db/db2   | db/db | 6165  | 0.018088 | FALSE | 0.941647 | FALSE | Photoreceptor          |
| ATTGGGT db/db2   | db/db | 8478  | 0.143501 | TRUE  | 1.782254 | FALSE |                        |
| ATTGTTCC db/db2  | db/db | 477   | 0.059406 | FALSE | 0.255972 | FALSE | Pericyte               |
| ATTGTTCT db/db2  | db/db | 242   | 0.034954 | FALSE | 48.84547 | TRUE  |                        |
| ATTGTTCT db/db2  | db/db | 10259 | 0.015879 | FALSE | 0.535235 | FALSE | Photoreceptor          |
| ATTTACCG db/db2  | db/db | 1065  | 0.020908 | FALSE | 0.902505 | FALSE | Photoreceptor          |
| ATTTACCG db/db2  | db/db | 2389  | 0.044326 | FALSE | 0.83161  | FALSE | Photoreceptor          |
| ATTTACCG db/db2  | db/db | 1921  | 0.042704 | FALSE | 1.488226 | FALSE | Photoreceptor          |
| ATTTACCT db/db2  | db/db | 8249  | 0.012052 | FALSE | 0.435116 | FALSE | Photoreceptor          |
| ATTTACCT db/db2  | db/db | 7128  | 0.019106 | FALSE | 0.955767 | FALSE | Photoreceptor          |
| ATTTACACA db/db2 | db/db | 968   | 0.015879 | FALSE | 1.86451  | FALSE | Neuron                 |
| ATTTACACA db/db2 | db/db | 2325  | 0.027273 | FALSE | 1.10555  | FALSE | Endothelia EC-C4       |
| ATTTACACC db/db2 | db/db | 1051  | 0.040404 | FALSE | 2.333044 | FALSE | Endothelia Venous EC   |
| ATTTCTGT db/db2  | db/db | 2660  | 0.034334 | FALSE | 1.305368 | FALSE | Endothelia Capillary E |
| ATTTCTGT db/db2  | db/db | 5348  | 0.030318 | FALSE | 0.978861 | FALSE | Endothelia Venous EC   |
| CAAAGAA db/db2   | db/db | 2495  | 0.055901 | FALSE | 1.528141 | FALSE | Photoreceptor          |
| CAAAGAA db/db2   | db/db | 710   | 0.059406 | FALSE | 1.794638 | FALSE | Endothelia Venous EC   |
| CAAAGAA db/db2   | db/db | 868   | 0.036891 | FALSE | 2.664734 | FALSE | Endothelia Capillary E |



|          |        |       |      |          |       |          |       |                        |
|----------|--------|-------|------|----------|-------|----------|-------|------------------------|
| CAAAGAA  | db/db2 | db/db | 1602 | 0.073582 | FALSE | 1.878423 | FALSE | Endothelia Capillary E |
| CAACAAC  | db/db2 | db/db | 2230 | 0.044326 | FALSE | 1.132939 | FALSE | Photoreceptor          |
| CAACAAC  | db/db2 | db/db | 1217 | 0.061912 | FALSE | 1.521678 | FALSE | Muller cell            |
| CAACAAC  | db/db2 | db/db | 1267 | 0.025416 | FALSE | 1.008149 | FALSE | Photoreceptor          |
| CAACAGT  | db/db2 | db/db | 624  | 0.023682 | FALSE | 1.585633 | FALSE | Photoreceptor          |
| CAACAGT  | db/db2 | db/db | 2528 | 0.060641 | FALSE | 1.802356 | FALSE | Endothelia Aterial EC  |
| CAACAGT  | db/db2 | db/db | 2134 | 0.051646 | FALSE | 1.513572 | FALSE | Muller cell            |
| CAACAGT  | db/db2 | db/db | 9558 | 0.296296 | TRUE  | 1.91376  | FALSE |                        |
| CAACAGT  | db/db2 | db/db | 5794 | 0.057037 | FALSE | 0.951805 | FALSE | Photoreceptor          |
| CAACAGT  | db/db2 | db/db | 3581 | 0.012814 | FALSE | 1.027041 | FALSE | Endothelia Venous EC   |
| CAACCAA  | db/db2 | db/db | 506  | 0.013338 | FALSE | 2.951432 | FALSE | Muller cell            |
| CAACCAAC | db/db2 | db/db | 5475 | 0.026796 | FALSE | 1.025472 | FALSE | Photoreceptor          |
| CAACCAAC | db/db2 | db/db | 3124 | 0.104679 | TRUE  | 1.578343 | FALSE |                        |
| CAACCAAT | db/db2 | db/db | 1586 | 0.014151 | FALSE | 0.230089 | FALSE | Photoreceptor          |
| CAACCTCA | db/db2 | db/db | 2409 | 0.067388 | FALSE | 0.984507 | FALSE | Photoreceptor          |
| CAACCTCA | db/db2 | db/db | 2862 | 0.024105 | FALSE | 1.377005 | FALSE | Endothelia Venous EC   |
| CAACCTCC | db/db2 | db/db | 4848 | 0.020908 | FALSE | 1.19112  | FALSE | Photoreceptor          |
| CAACCTCT | db/db2 | db/db | 9564 | 0.019455 | FALSE | 0.7095   | FALSE | Photoreceptor          |
| CAACCTCT | db/db2 | db/db | 487  | 0.047807 | FALSE | 9.60452  | TRUE  |                        |
| CAACGAT  | db/db2 | db/db | 1095 | 0.022455 | FALSE | 0.348151 | FALSE | Photoreceptor          |
| CAACGAT  | db/db2 | db/db | 1583 | 0.046025 | FALSE | 1.840521 | FALSE | Photoreceptor          |
| CAACGAT  | db/db2 | db/db | 1554 | 0.016488 | FALSE | 0.425396 | FALSE | Photoreceptor          |
| CAACGAT  | db/db2 | db/db | 2301 | 0.047807 | FALSE | 1.151142 | FALSE | Photoreceptor          |
| CAACGGC  | db/db2 | db/db | 1055 | 0.055901 | FALSE | 1.911284 | FALSE | Photoreceptor          |
| CAACGGC  | db/db2 | db/db | 5869 | 0.018761 | FALSE | 0.735255 | FALSE | Photoreceptor          |
| CAACGGC  | db/db2 | db/db | 1159 | 0.013338 | FALSE | 1.159087 | FALSE | Endothelia Capillary E |
| CAACGGC  | db/db2 | db/db | 1829 | 0.020908 | FALSE | 1.127769 | FALSE | Endothelia EC-C4       |
| CAACGGC  | db/db2 | db/db | 3780 | 0.010384 | FALSE | 1.016761 | FALSE | Endothelia Venous EC   |
| CAACGGC  | db/db2 | db/db | 3797 | 0.008438 | FALSE | 1.826757 | FALSE | Photoreceptor          |
| CAAGACT  | db/db2 | db/db | 2217 | 0.013074 | FALSE | 1.144725 | FALSE | Endothelia Capillary E |
| CAAGACT  | db/db2 | db/db | 9619 | 0.013876 | FALSE | 0.598279 | FALSE | Photoreceptor          |
| CAAGACT  | db/db2 | db/db | 993  | 0.029787 | FALSE | 2.54212  | FALSE | Endothelia Capillary E |
| CAAGACT  | db/db2 | db/db | 3162 | 0.005435 | FALSE | 1.094684 | FALSE | Neuron                 |
| CAAGAGG  | db/db2 | db/db | 3446 | 0.031411 | FALSE | 1.276244 | FALSE | Endothelia Capillary E |
| CAAGAGG  | db/db2 | db/db | 805  | 0.036891 | FALSE | 2.668368 | FALSE | Photoreceptor          |
| CAAGAGG  | db/db2 | db/db | 215  | 0.033726 | FALSE | 66.93549 | TRUE  |                        |
| CAAGCTA  | db/db2 | db/db | 745  | 0.013074 | FALSE | 4.783342 | FALSE | Muller cell            |
| CAAGCTA  | db/db2 | db/db | 5237 | 0.009063 | FALSE | 0.905019 | FALSE | Endothelia EC-C4       |
| CAAGCTAT | db/db2 | db/db | 835  | 0.027273 | FALSE | 0.219084 | FALSE | Photoreceptor          |
| CAAGGGA  | db/db2 | db/db | 925  | 0.075259 | FALSE | 1.312287 | FALSE | Photoreceptor          |
| CAAGGGA  | db/db2 | db/db | 1783 | 0.005782 | FALSE | 1.16074  | FALSE | Endothelia EC-C4       |
| CAATACGT | db/db2 | db/db | 2633 | 0.035586 | FALSE | 1.84253  | FALSE | Photoreceptor          |
| CAATACGT | db/db2 | db/db | 3245 | 0.026796 | FALSE | 1.101243 | FALSE | Microglia              |
| CAATACGT | db/db2 | db/db | 5268 | 0.028754 | FALSE | 0.994689 | FALSE | Endothelia Venous EC   |
| CAATCGA  | db/db2 | db/db | 4793 | 0.046025 | FALSE | 1.183828 | FALSE | Photoreceptor          |
| CAATCGAT | db/db2 | db/db | 4233 | 0.030318 | FALSE | 1.102041 | FALSE | Endothelia Capillary E |
| CAATGAC  | db/db2 | db/db | 2202 | 0.020171 | FALSE | 1.274741 | FALSE | Pericyte               |

|                 |       |      |          |       |          |       |                        |
|-----------------|-------|------|----------|-------|----------|-------|------------------------|
| CAATGACC db/db2 | db/db | 446  | 0.130259 | TRUE  | 3.733766 | FALSE |                        |
| CAATGACC db/db2 | db/db | 1560 | 0.122691 | TRUE  | 11.70139 | TRUE  |                        |
| CAATGACT db/db2 | db/db | 3374 | 0.024534 | FALSE | 0.520585 | FALSE | Photoreceptor          |
| CAATTTCC db/db2 | db/db | 494  | 0.075259 | FALSE | 12.08054 | TRUE  |                        |
| CAATTTCC db/db2 | db/db | 5146 | 0.009712 | FALSE | 0.994232 | FALSE | Endothelia Capillary E |
| CAATTTCC db/db2 | db/db | 2986 | 0.030859 | FALSE | 1.210475 | FALSE | Photoreceptor          |
| CAATTTCC db/db2 | db/db | 1217 | 0.03313  | FALSE | 1.911714 | FALSE | Endothelia Capillary E |
| CAATTTCT db/db2 | db/db | 1560 | 0.070386 | FALSE | 1.261792 | FALSE | Photoreceptor          |
| CACAACAC db/db2 | db/db | 9162 | 0.017434 | FALSE | 0.761452 | FALSE | Photoreceptor          |
| CACAACAC db/db2 | db/db | 1321 | 0.038251 | FALSE | 2.04089  | FALSE | Photoreceptor          |
| CACAACAC db/db2 | db/db | 5482 | 0.028251 | FALSE | 1.047328 | FALSE | Endothelia Venous EC   |
| CACACAA db/db2  | db/db | 2917 | 0.028754 | FALSE | 1.595563 | FALSE | Pericyte               |
| CACACAAC db/db2 | db/db | 2012 | 0.043505 | FALSE | 1.103975 | FALSE | Endothelia Capillary E |
| CACACAAC db/db2 | db/db | 5005 | 0.03313  | FALSE | 0.851649 | FALSE | Photoreceptor          |
| CACACAAT db/db2 | db/db | 3749 | 0.018422 | FALSE | 1.034409 | FALSE | Endothelia EC-C4       |
| CACACAAT db/db2 | db/db | 1057 | 0.020171 | FALSE | 0.328587 | FALSE | Photoreceptor          |
| CACAGATC db/db2 | db/db | 2884 | 0.007249 | FALSE | 1.320035 | FALSE | Photoreceptor          |
| CACAGATC db/db2 | db/db | 9456 | 0.03313  | FALSE | 0.709752 | FALSE | Photoreceptor          |
| CACAGATC db/db2 | db/db | 1419 | 0.018761 | FALSE | 1.722938 | FALSE | Pericyte               |
| CACAGATC db/db2 | db/db | 660  | 0.025416 | FALSE | 41.91739 | TRUE  |                        |
| CACAGGC db/db2  | db/db | 5247 | 0.015287 | FALSE | 1.290545 | FALSE | Photoreceptor          |
| CACAGGC db/db2  | db/db | 6932 | 0.031411 | FALSE | 0.713243 | FALSE | Photoreceptor          |
| CACAGGC db/db2  | db/db | 1985 | 0.007249 | FALSE | 1.166356 | FALSE | Endothelia Capillary E |
| CACAGGC db/db2  | db/db | 1421 | 0.055901 | FALSE | 1.761639 | FALSE | Photoreceptor          |
| CACAGGC db/db2  | db/db | 5510 | 0.021669 | FALSE | 1.023953 | FALSE | Photoreceptor          |
| CACAGGC db/db2  | db/db | 1472 | 0.067388 | FALSE | 3.064324 | FALSE | Muller cell            |
| CACATGA db/db2  | db/db | 6198 | 0.032546 | FALSE | 1.041603 | FALSE | Photoreceptor          |
| CACATGA db/db2  | db/db | 3987 | 0.031411 | FALSE | 1.280905 | FALSE | Pericyte               |
| CACATGA db/db2  | db/db | 9173 | 0.016799 | FALSE | 0.588222 | FALSE | Photoreceptor          |
| CACCAAA db/db2  | db/db | 507  | 0.088776 | FALSE | 2.388704 | FALSE | Muller cell            |
| CACCAAAC db/db2 | db/db | 9668 | 0.022857 | FALSE | 0.678309 | FALSE | Photoreceptor          |
| CACCAAAT db/db2 | db/db | 412  | 0.038251 | FALSE | 44.21158 | TRUE  |                        |
| CACCGTTA db/db2 | db/db | 510  | 0.025868 | FALSE | 1.878304 | FALSE | Photoreceptor          |
| CACCGTTA db/db2 | db/db | 2951 | 0.024105 | FALSE | 1.23725  | FALSE | Endothelia EC-C4       |
| CACCGTTA db/db2 | db/db | 6592 | 0.046906 | FALSE | 0.864064 | FALSE | Photoreceptor          |
| CACCGTTC db/db2 | db/db | 404  | 0.024971 | FALSE | 2.261998 | FALSE | Endothelia Capillary E |
| CACCGTTC db/db2 | db/db | 1114 | 0.03313  | FALSE | 0.613614 | FALSE | Photoreceptor          |
| CACGAATC db/db2 | db/db | 9844 | 0.030318 | FALSE | 0.675829 | FALSE | Photoreceptor          |
| CACGAATC db/db2 | db/db | 419  | 0.014429 | FALSE | 47.24265 | TRUE  |                        |
| CACGAATT db/db2 | db/db | 1712 | 0.063221 | FALSE | 1.235111 | FALSE | Photoreceptor          |
| CACGGGT db/db2  | db/db | 3832 | 0.020536 | FALSE | 0.990901 | FALSE | Photoreceptor          |
| CACGGGT db/db2  | db/db | 439  | 0.044326 | FALSE | 38.13056 | TRUE  |                        |
| CACGGGT db/db2  | db/db | 5360 | 0.037564 | FALSE | 1.340062 | FALSE | Endothelia Venous EC   |
| CACGTGG db/db2  | db/db | 409  | 0.022455 | FALSE | 2.322128 | FALSE | Muller cell            |
| CACGTGG db/db2  | db/db | 3737 | 0.012303 | FALSE | 0.985351 | FALSE | Endothelia EC-C4       |
| CACGTGG db/db2  | db/db | 1760 | 0.017434 | FALSE | 1.166711 | FALSE | Pericyte               |
| CACGTGG db/db2  | db/db | 685  | 0.042704 | FALSE | 2.756898 | FALSE | Pericyte               |

|                 |       |      |          |       |          |       |                        |
|-----------------|-------|------|----------|-------|----------|-------|------------------------|
| CACGTTCC db/db2 | db/db | 4812 | 0.065957 | FALSE | 1.263363 | FALSE | Photoreceptor          |
| CACGTTCC db/db2 | db/db | 489  | 0.038251 | FALSE | 55.40866 | TRUE  |                        |
| CACGTTCC db/db2 | db/db | 2308 | 0.070386 | FALSE | 1.703516 | FALSE | Pericyte               |
| CACTAAGC db/db2 | db/db | 2668 | 0.039671 | FALSE | 1.271611 | FALSE | Neuron                 |
| CACTAAGT db/db2 | db/db | 373  | 0.025416 | FALSE | 3.111063 | FALSE | Muller cell            |
| CACTGAA db/db2  | db/db | 333  | 0.049679 | FALSE | 23.58491 | TRUE  |                        |
| CACTGAAC db/db2 | db/db | 6612 | 0.027273 | FALSE | 0.99609  | FALSE | Photoreceptor          |
| CACTGAAC db/db2 | db/db | 3794 | 0.027273 | FALSE | 0.905141 | FALSE | Photoreceptor          |
| CACTGAAC db/db2 | db/db | 583  | 0.034954 | FALSE | 1.710225 | FALSE | Pericyte               |
| CACTGAAC db/db2 | db/db | 2248 | 0.015287 | FALSE | 0.789192 | FALSE | Photoreceptor          |
| CACTGAAC db/db2 | db/db | 815  | 0.061912 | FALSE | 2.985611 | FALSE | Endothelia Capillary E |
| CACTGAAT db/db2 | db/db | 2163 | 0.023266 | FALSE | 1.114226 | FALSE | Endothelia Capillary E |
| CACTGAAT db/db2 | db/db | 7727 | 0.068864 | FALSE | 0.939314 | FALSE | Photoreceptor          |
| CACTGAAT db/db2 | db/db | 688  | 0.109375 | TRUE  | 9.896729 | TRUE  |                        |
| CACTGGG db/db2  | db/db | 6802 | 0.061912 | FALSE | 1.133169 | FALSE | Photoreceptor          |
| CACTGGG db/db2  | db/db | 6703 | 0.01981  | FALSE | 0.898442 | FALSE | Photoreceptor          |
| CACTGGG db/db2  | db/db | 567  | 0.084562 | FALSE | 4.917327 | FALSE | Muller cell            |
| CACTGGG db/db2  | db/db | 4482 | 0.091004 | FALSE | 0.870585 | FALSE | Neuron                 |
| CACTGTCA db/db2 | db/db | 356  | 0.014429 | FALSE | 4.935536 | FALSE | Muller cell            |
| CACTGTCC db/db2 | db/db | 9217 | 0.017758 | FALSE | 0.63788  | FALSE | Photoreceptor          |
| CACTGTCC db/db2 | db/db | 3145 | 0.036891 | FALSE | 0.477679 | FALSE | Neuron                 |
| CACTGTCT db/db2 | db/db | 2673 | 0.078788 | FALSE | 1.258102 | FALSE | Photoreceptor          |
| CACTTCGA db/db2 | db/db | 1149 | 0.034334 | FALSE | 3.40082  | FALSE | Endothelia Capillary E |
| CACTTCGA db/db2 | db/db | 9778 | 0.014429 | FALSE | 0.429816 | FALSE | Photoreceptor          |
| CACTTCGC db/db2 | db/db | 1804 | 0.018088 | FALSE | 1.46452  | FALSE | Endothelia Capillary E |
| CACTTCGC db/db2 | db/db | 409  | 0.044326 | FALSE | 3.509524 | FALSE | Endothelia Capillary E |
| CACTTCGC db/db2 | db/db | 2639 | 0.115723 | TRUE  | 10.93835 | TRUE  |                        |
| CACTTCGC db/db2 | db/db | 3395 | 0.023682 | FALSE | 0.852895 | FALSE | Endothelia EC-C4       |
| CACTTCGC db/db2 | db/db | 3048 | 0.070386 | FALSE | 1.157176 | FALSE | Pericyte               |
| CACTTCGC db/db2 | db/db | 251  | 0.028251 | FALSE | 67.39584 | TRUE  |                        |
| CACTTCGT db/db2 | db/db | 1796 | 0.073582 | FALSE | 20.80662 | TRUE  |                        |
| CAGAGCC db/db2  | db/db | 4419 | 0.024971 | FALSE | 0.49082  | FALSE | Photoreceptor          |
| CAGAGCC db/db2  | db/db | 4750 | 0.098234 | FALSE | 1.181216 | FALSE | Neuron                 |
| CAGAGCC db/db2  | db/db | 454  | 0.023266 | FALSE | 53.8864  | TRUE  |                        |
| CAGAGCC db/db2  | db/db | 6002 | 0.027758 | FALSE | 1.19251  | FALSE | Photoreceptor          |
| CAGATAC db/db2  | db/db | 920  | 0.065957 | FALSE | 10.47431 | TRUE  |                        |
| CAGATAC db/db2  | db/db | 2202 | 0.095727 | FALSE | 2.116467 | FALSE | Muller cell            |
| CAGATAC db/db2  | db/db | 2270 | 0.048732 | FALSE | 1.24588  | FALSE | Endothelia Capillary E |
| CAGATAC db/db2  | db/db | 2396 | 0.103732 | TRUE  | 1.538023 | FALSE |                        |
| CAGATAC db/db2  | db/db | 2890 | 0.082569 | FALSE | 1.375049 | FALSE | Neuron                 |
| CAGATCA db/db2  | db/db | 367  | 0.112037 | TRUE  | 0.374795 | FALSE |                        |
| CAGATCA db/db2  | db/db | 5088 | 0.031411 | FALSE | 0.933114 | FALSE | Photoreceptor          |
| CAGATTG db/db2  | db/db | 3904 | 0.029787 | FALSE | 1.132227 | FALSE | Endothelia Capillary E |
| CAGATTG db/db2  | db/db | 435  | 0.038953 | FALSE | 4.631829 | FALSE | Muller cell            |
| CAGATTG db/db2  | db/db | 2790 | 0.048732 | FALSE | 1.412106 | FALSE | Photoreceptor          |
| CAGATTGT db/db2 | db/db | 1829 | 0.014429 | FALSE | 1.882295 | FALSE | Endothelia Aterial EC  |
| CAGCAATC db/db2 | db/db | 2767 | 0.032546 | FALSE | 0.626674 | FALSE | Photoreceptor          |

|                 |       |       |          |       |          |       |                        |
|-----------------|-------|-------|----------|-------|----------|-------|------------------------|
| CAGCAATC db/db2 | db/db | 4610  | 0.01981  | FALSE | 0.52863  | FALSE | Photoreceptor          |
| CAGCAATT db/db2 | db/db | 9034  | 0.065957 | FALSE | 0.826992 | FALSE | Photoreceptor          |
| CAGCAATT db/db2 | db/db | 350   | 0.054795 | FALSE | 25.70162 | TRUE  |                        |
| CAGCAATT db/db2 | db/db | 9534  | 0.012052 | FALSE | 0.53906  | FALSE | Photoreceptor          |
| CAGCACG db/db2  | db/db | 487   | 0.017434 | FALSE | 3.917375 | FALSE | Muller cell            |
| CAGCACG db/db2  | db/db | 3025  | 0.024971 | FALSE | 1.098022 | FALSE | Endothelia Aterial EC  |
| CAGCACG db/db2  | db/db | 7256  | 0.023266 | FALSE | 0.783386 | FALSE | Photoreceptor          |
| CAGCACG db/db2  | db/db | 1560  | 0.044326 | FALSE | 1.567968 | FALSE | Photoreceptor          |
| CAGCACG db/db2  | db/db | 10133 | 0.035586 | FALSE | 0.719387 | FALSE | Photoreceptor          |
| CAGCACG db/db2  | db/db | 5850  | 0.164835 | TRUE  | 4.80347  | FALSE |                        |
| CAGCACG db/db2  | db/db | 4190  | 0.020908 | FALSE | 0.705655 | FALSE | Photoreceptor          |
| CAGCACG db/db2  | db/db | 636   | 0.036232 | FALSE | 0.543865 | FALSE | Photoreceptor          |
| CAGCACG db/db2  | db/db | 5002  | 0.044326 | FALSE | 0.671144 | FALSE | Photoreceptor          |
| CAGCACG db/db2  | db/db | 2766  | 0.022455 | FALSE | 0.933327 | FALSE | Photoreceptor          |
| CAGCACG db/db2  | db/db | 764   | 0.014997 | FALSE | 1.907349 | FALSE | Endothelia Capillary E |
| CAGCCAG db/db2  | db/db | 679   | 0.015581 | FALSE | 3.399177 | FALSE | Muller cell            |
| CAGCCAG db/db2  | db/db | 498   | 0.095727 | FALSE | 2.305127 | FALSE | Photoreceptor          |
| CAGCGTG db/db2  | db/db | 440   | 0.012303 | FALSE | 1.70779  | FALSE | Muller cell            |
| CAGCGTG db/db2  | db/db | 1156  | 0.020536 | FALSE | 0.877058 | FALSE | Photoreceptor          |
| CAGCGTG db/db2  | db/db | 4776  | 0.071958 | FALSE | 0.911807 | FALSE | Endothelia Venous EC   |
| CAGCGTG db/db2  | db/db | 859   | 0.041154 | FALSE | 2.531999 | FALSE | Endothelia Capillary E |
| CAGGCCA db/db2  | db/db | 1607  | 0.026796 | FALSE | 1.855252 | FALSE | Endothelia Capillary E |
| CAGGCCA db/db2  | db/db | 9476  | 0.020536 | FALSE | 0.553697 | FALSE | Photoreceptor          |
| CAGGCCA db/db2  | db/db | 4711  | 0.028754 | FALSE | 0.90339  | FALSE | Endothelia Venous EC   |
| CAGGCCA db/db2  | db/db | 3669  | 0.039671 | FALSE | 1.198089 | FALSE | Photoreceptor          |
| CAGGGCT db/db2  | db/db | 1610  | 0.014997 | FALSE | 1.52525  | FALSE | Endothelia Capillary E |
| CAGGGCT db/db2  | db/db | 2043  | 0.033726 | FALSE | 1.41579  | FALSE | Endothelia Capillary E |
| CAGGGCT db/db2  | db/db | 4844  | 0.026328 | FALSE | 0.994344 | FALSE | Endothelia Venous EC   |
| CAGGGCT db/db2  | db/db | 8557  | 0.029787 | FALSE | 0.615778 | FALSE | Photoreceptor          |
| CAGGTATT db/db2 | db/db | 686   | 0.022059 | FALSE | 29.34866 | TRUE  |                        |
| CAGGTATT db/db2 | db/db | 1455  | 0.015287 | FALSE | 1.418964 | FALSE | Endothelia Capillary E |
| CAGTGCG db/db2  | db/db | 2592  | 0.058205 | FALSE | 1.330818 | FALSE | Photoreceptor          |
| CAGTGCG db/db2  | db/db | 2939  | 0.012557 | FALSE | 1.503735 | FALSE | Neuron                 |
| CAGTTAG db/db2  | db/db | 1659  | 0.014711 | FALSE | 3.276734 | FALSE | Muller cell            |
| CAGTTAG db/db2  | db/db | 686   | 0.059406 | FALSE | 1.66808  | FALSE | Endothelia Capillary E |
| CAGTTAG db/db2  | db/db | 4387  | 0.047807 | FALSE | 1.125459 | FALSE | Endothelia Aterial EC  |
| CAGTTAG db/db2  | db/db | 1021  | 0.070386 | FALSE | 1.845499 | FALSE | Photoreceptor          |
| CAGTTAG db/db2  | db/db | 1726  | 0.014997 | FALSE | 0.7397   | FALSE | Photoreceptor          |
| CAGTTAG db/db2  | db/db | 2588  | 0.015879 | FALSE | 1.158727 | FALSE | Pericyte               |
| CAGTTAG db/db2  | db/db | 3577  | 0.078788 | FALSE | 0.979252 | FALSE | Endothelia EC-C4       |
| CAGTTAG db/db2  | db/db | 1734  | 0.044326 | FALSE | 1.531483 | FALSE | Photoreceptor          |
| CAGTTCCA db/db2 | db/db | 2032  | 0.014711 | FALSE | 1.021115 | FALSE | Endothelia Capillary E |
| CAGTTCCA db/db2 | db/db | 9105  | 0.014151 | FALSE | 0.704435 | FALSE | Photoreceptor          |
| CAGTTCCC db/db2 | db/db | 5336  | 0.016181 | FALSE | 1.145172 | FALSE | Photoreceptor          |
| CATAAGC db/db2  | db/db | 1293  | 0.048732 | FALSE | 1.259132 | FALSE | Photoreceptor          |
| CATAAGC db/db2  | db/db | 6792  | 0.068864 | FALSE | 0.850058 | FALSE | Photoreceptor          |
| CATAAGC db/db2  | db/db | 8817  | 0.018422 | FALSE | 0.691179 | FALSE | Photoreceptor          |

|                             |       |       |          |       |          |       |                        |
|-----------------------------|-------|-------|----------|-------|----------|-------|------------------------|
| CATACAG <del>A</del> db/db2 | db/db | 9632  | 0.034334 | FALSE | 0.649288 | FALSE | Photoreceptor          |
| CATACAG <del>C</del> db/db2 | db/db | 580   | 0.034334 | FALSE | 0.866659 | FALSE | Neuron                 |
| CATACAG <del>C</del> db/db2 | db/db | 338   | 0.106646 | TRUE  | 0.320452 | FALSE |                        |
| CATACAG <del>T</del> db/db2 | db/db | 2754  | 0.10565  | TRUE  | 1.830509 | FALSE |                        |
| CATACAG <del>T</del> db/db2 | db/db | 1335  | 0.078788 | FALSE | 2.072122 | FALSE | Photoreceptor          |
| CATACCCC db/db2             | db/db | 7140  | 0.019455 | FALSE | 0.670317 | FALSE | Photoreceptor          |
| CATACCCC db/db2             | db/db | 1666  | 0.038953 | FALSE | 1.483303 | FALSE | Endothelia EC-C4       |
| CATACCCT db/db2             | db/db | 2825  | 0.015287 | FALSE | 0.87718  | FALSE | Endothelia Aterial EC  |
| CATACCCT db/db2             | db/db | 2879  | 0.048732 | FALSE | 1.218876 | FALSE | Neuron                 |
| CATACTTA db/db2             | db/db | 1810  | 0.014151 | FALSE | 1.22498  | FALSE | Photoreceptor          |
| CATACTTA db/db2             | db/db | 4006  | 0.075259 | FALSE | 1.29175  | FALSE | Endothelia EC-C4       |
| CATACTTA db/db2             | db/db | 537   | 0.014711 | FALSE | 0        | FALSE | Photoreceptor          |
| CATACTTG db/db2             | db/db | 5315  | 0.021286 | FALSE | 0.707705 | FALSE | Photoreceptor          |
| CATACTTG db/db2             | db/db | 412   | 0.04192  | FALSE | 4.796288 | FALSE | Muller cell            |
| CATACTTT db/db2             | db/db | 3341  | 0.043505 | FALSE | 1.08246  | FALSE | Microglia              |
| CATAGAC <del>A</del> db/db2 | db/db | 3844  | 0.013338 | FALSE | 1.260146 | FALSE | Endothelia Capillary E |
| CATAGAC <del>A</del> db/db2 | db/db | 10111 | 0.021286 | FALSE | 0.453686 | FALSE | Photoreceptor          |
| CATCAAG <del>A</del> db/db2 | db/db | 509   | 0.027273 | FALSE | 2.191895 | FALSE | Endothelia Capillary E |
| CATCAAG <del>C</del> db/db2 | db/db | 1516  | 0.025868 | FALSE | 1.289806 | FALSE | Photoreceptor          |
| CATCAAG <del>C</del> db/db2 | db/db | 277   | 0.020171 | FALSE | 53.35196 | TRUE  |                        |
| CATCAAG <del>T</del> db/db2 | db/db | 3427  | 0.010614 | FALSE | 1.749198 | FALSE | Photoreceptor          |
| CATCAAG <del>T</del> db/db2 | db/db | 2596  | 0.080645 | FALSE | 9.610352 | TRUE  |                        |
| CATCCACC db/db2             | db/db | 647   | 0.060641 | FALSE | 4.212735 | FALSE | Muller cell            |
| CATCCACC db/db2             | db/db | 4496  | 0.009493 | FALSE | 1.584692 | FALSE | Photoreceptor          |
| CATCCACC db/db2             | db/db | 1765  | 0.060641 | FALSE | 17.3407  | TRUE  |                        |
| CATCCACG db/db2             | db/db | 1222  | 0.014151 | FALSE | 0.62137  | FALSE | Photoreceptor          |
| CATCCCAA db/db2             | db/db | 744   | 0.067388 | FALSE | 2.757599 | FALSE | Photoreceptor          |
| CATCCCAT db/db2             | db/db | 1443  | 0.043505 | FALSE | 1.296781 | FALSE | Photoreceptor          |
| CATCCGTT db/db2             | db/db | 558   | 0.053718 | FALSE | 2.416487 | FALSE | Photoreceptor          |
| CATCCGTT db/db2             | db/db | 981   | 0.036232 | FALSE | 3.811943 | FALSE | Muller cell            |
| CATCGCTA db/db2             | db/db | 2837  | 0.112037 | TRUE  | 1.396385 | FALSE |                        |
| CATCGCTA db/db2             | db/db | 1837  | 0.106408 | TRUE  | 8.621998 | TRUE  |                        |
| CATCGCTC db/db2             | db/db | 912   | 0.009063 | FALSE | 0.545753 | FALSE | Photoreceptor          |
| CATCGCTG db/db2             | db/db | 622   | 0.044326 | FALSE | 4.460058 | FALSE | Muller cell            |
| CATCGCTT db/db2             | db/db | 1899  | 0.011805 | FALSE | 1.124016 | FALSE | Endothelia Capillary E |
| CATCGGG <del>C</del> db/db2 | db/db | 6118  | 0.020908 | FALSE | 1.032169 | FALSE | Photoreceptor          |
| CATCGGG <del>T</del> db/db2 | db/db | 2615  | 0.08663  | FALSE | 2.200838 | FALSE | Photoreceptor          |
| CATCGGG <del>T</del> db/db2 | db/db | 1745  | 0.048732 | FALSE | 1.585248 | FALSE | Endothelia Capillary E |
| CATCGGG <del>T</del> db/db2 | db/db | 5073  | 0.218615 | TRUE  | 4.023138 | FALSE |                        |
| CATGAGT <del>A</del> db/db2 | db/db | 2542  | 0.034334 | FALSE | 1.149847 | FALSE | Photoreceptor          |
| CATGAGT <del>C</del> db/db2 | db/db | 5521  | 0.03313  | FALSE | 0.767328 | FALSE | Photoreceptor          |
| CATGAGT <del>C</del> db/db2 | db/db | 1882  | 0.012814 | FALSE | 1.209567 | FALSE | Pericyte               |
| CATGAGT <del>T</del> db/db2 | db/db | 1400  | 0.061912 | FALSE | 1.242866 | FALSE | Photoreceptor          |
| CATGCAA <del>A</del> db/db2 | db/db | 2712  | 0.027758 | FALSE | 1.562139 | FALSE | Endothelia Venous EC   |
| CATGCAAC db/db2             | db/db | 413   | 0.073582 | FALSE | 3.842411 | FALSE | Muller cell            |
| CATGCCTA db/db2             | db/db | 760   | 0.017434 | FALSE | 2.413078 | FALSE | Endothelia Capillary E |
| CATGCCTT db/db2             | db/db | 995   | 0.013074 | FALSE | 0.419792 | FALSE | Photoreceptor          |

|                 |       |      |          |       |          |       |                        |
|-----------------|-------|------|----------|-------|----------|-------|------------------------|
| CATGCGG/db/db2  | db/db | 1306 | 0.063221 | FALSE | 1.140043 | FALSE | Photoreceptor          |
| CATGCGG/db/db2  | db/db | 6904 | 0.034954 | FALSE | 0.97965  | FALSE | Photoreceptor          |
| CATGCGG/db/db2  | db/db | 4770 | 0.023682 | FALSE | 0.927818 | FALSE | Photoreceptor          |
| CATGCGG/db/db2  | db/db | 451  | 0.046906 | FALSE | 26.91839 | TRUE  |                        |
| CATGCGG/db/db2  | db/db | 5805 | 0.314286 | TRUE  | 2.38811  | FALSE |                        |
| CATGCGG/db/db2  | db/db | 2972 | 0.011561 | FALSE | 0.932873 | FALSE | Endothelia Venous EC   |
| CATGCGG/db/db2  | db/db | 339  | 0.018422 | FALSE | 50.70093 | TRUE  |                        |
| CATGCTCC db/db2 | db/db | 398  | 0.095727 | FALSE | 35.16624 | TRUE  |                        |
| CATGCTCC db/db2 | db/db | 3060 | 0.064568 | FALSE | 1.266074 | FALSE | Photoreceptor          |
| CATGGATC db/db2 | db/db | 2378 | 0.010384 | FALSE | 1.063535 | FALSE | Photoreceptor          |
| CATGGATC db/db2 | db/db | 1261 | 0.060641 | FALSE | 1.70835  | FALSE | Photoreceptor          |
| CATGGATT db/db2 | db/db | 3501 | 0.024971 | FALSE | 1.198636 | FALSE | Endothelia Venous EC   |
| CATGGATT db/db2 | db/db | 3516 | 0.080645 | FALSE | 1.291484 | FALSE | Endothelia Capillary E |
| CATGGTA/db/db2  | db/db | 1388 | 0.054795 | FALSE | 1.881431 | FALSE | Photoreceptor          |
| CATGGTA/db/db2  | db/db | 1752 | 0.031411 | FALSE | 0.992869 | FALSE | Endothelia Aterial EC  |
| CATGGTAC db/db2 | db/db | 1951 | 0.029787 | FALSE | 1.548556 | FALSE | Neuron                 |
| CATTCATC db/db2 | db/db | 1629 | 0.021669 | FALSE | 1.676567 | FALSE | Endothelia Aterial EC  |
| CATTCATC db/db2 | db/db | 2283 | 0.033726 | FALSE | 0.48632  | FALSE | Photoreceptor          |
| CATTCATC db/db2 | db/db | 1650 | 0.026328 | FALSE | 0.743442 | FALSE | Photoreceptor          |
| CATTCATG db/db2 | db/db | 7510 | 0.028754 | FALSE | 0.872509 | FALSE | Photoreceptor          |
| CATTCATG db/db2 | db/db | 1552 | 0.078788 | FALSE | 1.613428 | FALSE | Pericyte               |
| CATTCCGA db/db2 | db/db | 847  | 0.040404 | FALSE | 4.556425 | FALSE | Muller cell            |
| CATTCCGA db/db2 | db/db | 3660 | 0.036232 | FALSE | 0.945237 | FALSE | Photoreceptor          |
| CATTCCGA db/db2 | db/db | 3409 | 0.057037 | FALSE | 1.670733 | FALSE | Photoreceptor          |
| CATTCCGA db/db2 | db/db | 3751 | 0.014711 | FALSE | 1.097573 | FALSE | Endothelia Capillary E |
| CATTCCGC db/db2 | db/db | 4816 | 0.016181 | FALSE | 0.949732 | FALSE | Endothelia Capillary E |
| CATTCCGC db/db2 | db/db | 341  | 0.028251 | FALSE | 36       | TRUE  |                        |
| CATTCCGT db/db2 | db/db | 5046 | 0.023682 | FALSE | 1.087576 | FALSE | Endothelia Capillary E |
| CATTCCGT db/db2 | db/db | 3050 | 0.012814 | FALSE | 1.215062 | FALSE | Endothelia Venous EC   |
| CATTCCGT db/db2 | db/db | 464  | 0.048732 | FALSE | 31.76065 | TRUE  |                        |
| CATTCCGT db/db2 | db/db | 628  | 0.034334 | FALSE | 2.596755 | FALSE | Muller cell            |
| CATTCCGT db/db2 | db/db | 1793 | 0.011561 | FALSE | 1.34833  | FALSE | Endothelia Aterial EC  |
| CATTCTAA db/db2 | db/db | 530  | 0.016488 | FALSE | 2.993791 | FALSE | Muller cell            |
| CATTCTAG db/db2 | db/db | 2248 | 0.100845 | TRUE  | 1.887942 | FALSE |                        |
| CATTCTAG db/db2 | db/db | 2519 | 0.073582 | FALSE | 1.478983 | FALSE | Pericyte               |
| CATTCTAG db/db2 | db/db | 4947 | 0.112477 | TRUE  | 2.434583 | FALSE |                        |
| CATTCTAT db/db2 | db/db | 2759 | 0.038953 | FALSE | 1.065587 | FALSE | Photoreceptor          |
| CATTCTAT db/db2 | db/db | 652  | 0.078788 | FALSE | 4.249466 | FALSE | Muller cell            |
| CATTGAG/db/db2  | db/db | 6876 | 0.030318 | FALSE | 1.034263 | FALSE | Photoreceptor          |
| CATTGAG/db/db2  | db/db | 3060 | 0.041154 | FALSE | 0.957559 | FALSE | Photoreceptor          |
| CATTGAG/db/db2  | db/db | 775  | 0.009712 | FALSE | 1.971386 | FALSE | Endothelia Capillary E |
| CATTGAG/db/db2  | db/db | 563  | 0.080645 | FALSE | 2.005787 | FALSE | Photoreceptor          |
| CATTGAG/db/db2  | db/db | 3923 | 0.137569 | TRUE  | 1.496834 | FALSE |                        |
| CATTGAGT db/db2 | db/db | 4001 | 0.019106 | FALSE | 0.989411 | FALSE | Endothelia Venous EC   |
| CATTGCCC db/db2 | db/db | 6164 | 0.041154 | FALSE | 0.864295 | FALSE | Endothelia Venous EC   |
| CATTGCCC db/db2 | db/db | 3610 | 0.040404 | FALSE | 1.459832 | FALSE | Endothelia Capillary E |
| CATTGCCC db/db2 | db/db | 3732 | 0.022857 | FALSE | 1.266477 | FALSE | Photoreceptor          |

|                 |       |      |          |       |          |       |                        |
|-----------------|-------|------|----------|-------|----------|-------|------------------------|
| CATTGCCC db/db2 | db/db | 407  | 0.048732 | FALSE | 2.570949 | FALSE | Pericyte               |
| CATTGCCT db/db2 | db/db | 873  | 0.04192  | FALSE | 4.144566 | FALSE | Muller cell            |
| CATTGTTA db/db2 | db/db | 7428 | 0.029266 | FALSE | 0.728186 | FALSE | Photoreceptor          |
| CATTGTTG db/db2 | db/db | 2375 | 0.073582 | FALSE | 0.90999  | FALSE | Photoreceptor          |
| CATTGTTT db/db2 | db/db | 1866 | 0.031973 | FALSE | 1.283194 | FALSE | Photoreceptor          |
| CATTGTTT db/db2 | db/db | 934  | 0.033726 | FALSE | 0.950604 | FALSE | Photoreceptor          |
| CATTTCAA db/db2 | db/db | 1443 | 0.110901 | TRUE  | 2.223154 | FALSE |                        |
| CATTTCAA db/db2 | db/db | 7577 | 0.022455 | FALSE | 0.659711 | FALSE | Photoreceptor          |
| CATTTCAC db/db2 | db/db | 3742 | 0.023682 | FALSE | 1.542386 | FALSE | Photoreceptor          |
| CATTTCAG db/db2 | db/db | 4369 | 0.080645 | FALSE | 6.576935 | TRUE  |                        |
| CCAAGCGC db/db2 | db/db | 437  | 0.073582 | FALSE | 27.39872 | TRUE  |                        |
| CCAAGCGC db/db2 | db/db | 1152 | 0.095727 | FALSE | 2.851576 | FALSE | Muller cell            |
| CCAATGA db/db2  | db/db | 3566 | 0.018088 | FALSE | 1.373416 | FALSE | Photoreceptor          |
| CCAATGA db/db2  | db/db | 3122 | 0.04192  | FALSE | 1.166515 | FALSE | Photoreceptor          |
| CCAATGA db/db2  | db/db | 2512 | 0.009712 | FALSE | 1.01627  | FALSE | Endothelia EC-C4       |
| CCAATGAC db/db2 | db/db | 576  | 0.015879 | FALSE | 0.783127 | FALSE | Endothelia Aterial EC  |
| CCAATGAC db/db2 | db/db | 4173 | 0.018088 | FALSE | 1.281708 | FALSE | Photoreceptor          |
| CCAATGAT db/db2 | db/db | 3933 | 0.014711 | FALSE | 1.080846 | FALSE | Endothelia Venous EC   |
| CCAATTTG db/db2 | db/db | 2351 | 0.053718 | FALSE | 1.829391 | FALSE | Photoreceptor          |
| CCAATTTG db/db2 | db/db | 3479 | 0.015879 | FALSE | 0.820398 | FALSE | Endothelia Venous EC   |
| CCACAAA db/db2  | db/db | 6565 | 0.052669 | FALSE | 0.826698 | FALSE | Photoreceptor          |
| CCACAAA db/db2  | db/db | 3548 | 0.184701 | TRUE  | 1.697364 | FALSE |                        |
| CCACAAAC db/db2 | db/db | 661  | 0.015581 | FALSE | 0.277579 | FALSE | Photoreceptor          |
| CCACAAAC db/db2 | db/db | 2417 | 0.104679 | TRUE  | 1.465668 | FALSE |                        |
| CCACAAAC db/db2 | db/db | 5703 | 0.073582 | FALSE | 1.030339 | FALSE | Endothelia EC-C4       |
| CCACAAAC db/db2 | db/db | 7647 | 0.01981  | FALSE | 0.777396 | FALSE | Photoreceptor          |
| CCACAAAT db/db2 | db/db | 3510 | 0.021286 | FALSE | 0.861226 | FALSE | Photoreceptor          |
| CCACACTA db/db2 | db/db | 3065 | 0.034334 | FALSE | 1.249379 | FALSE | Endothelia Capillary E |
| CCACACTC db/db2 | db/db | 1717 | 0.014151 | FALSE | 0.927015 | FALSE | Endothelia Capillary E |
| CCACACTC db/db2 | db/db | 677  | 0.030318 | FALSE | 49.07317 | TRUE  |                        |
| CCACACTT db/db2 | db/db | 440  | 0.032546 | FALSE | 26.80272 | TRUE  |                        |
| CCACCATA db/db2 | db/db | 336  | 0.078788 | FALSE | 4.202703 | FALSE | Muller cell            |
| CCACCATC db/db2 | db/db | 688  | 0.093319 | FALSE | 3.218999 | FALSE | Photoreceptor          |
| CCACCATC db/db2 | db/db | 3182 | 0.015879 | FALSE | 1.166713 | FALSE | Endothelia Venous EC   |
| CCACCATG db/db2 | db/db | 5119 | 0.024105 | FALSE | 1.031222 | FALSE | Photoreceptor          |
| CCACCATT db/db2 | db/db | 8211 | 0.025868 | FALSE | 0.657752 | FALSE | Photoreceptor          |
| CCACGAG db/db2  | db/db | 1699 | 0.025416 | FALSE | 1.750595 | FALSE | Endothelia Capillary E |
| CCACGAG db/db2  | db/db | 3732 | 0.013338 | FALSE | 1.123304 | FALSE | Neuron                 |
| CCACGAG db/db2  | db/db | 3360 | 0.009277 | FALSE | 1.557931 | FALSE | Photoreceptor          |
| CCACGAGC db/db2 | db/db | 724  | 0.036891 | FALSE | 0.446012 | FALSE | Pericyte               |
| CCACGAGC db/db2 | db/db | 4355 | 0.018761 | FALSE | 1.024382 | FALSE | Endothelia EC-C4       |
| CCACGAGC db/db2 | db/db | 6365 | 0.015879 | FALSE | 0.618722 | FALSE | Photoreceptor          |
| CCACGTTA db/db2 | db/db | 1066 | 0.015287 | FALSE | 0.350462 | FALSE | Photoreceptor          |
| CCACGTTA db/db2 | db/db | 2776 | 0.014711 | FALSE | 0.781201 | FALSE | Endothelia EC-C4       |
| CCACGTTC db/db2 | db/db | 548  | 0.064568 | FALSE | 7.257072 | TRUE  |                        |
| CCACGTTC db/db2 | db/db | 2405 | 0.024971 | FALSE | 0.729619 | FALSE | Photoreceptor          |
| CCACGTTT db/db2 | db/db | 1116 | 0.022059 | FALSE | 1.322833 | FALSE | Endothelia EC-C4       |

|                 |       |       |          |       |          |       |                         |
|-----------------|-------|-------|----------|-------|----------|-------|-------------------------|
| CCACTTGC db/db2 | db/db | 5575  | 0.080645 | FALSE | 1.077089 | FALSE | Endothelia Venous EC    |
| CCACTTGC db/db2 | db/db | 4638  | 0.028251 | FALSE | 1.130829 | FALSE | Photoreceptor           |
| CCACTTGC db/db2 | db/db | 3685  | 0.013074 | FALSE | 0.633511 | FALSE | Photoreceptor           |
| CCACTTGT db/db2 | db/db | 1200  | 0.034954 | FALSE | 1.078257 | FALSE | Photoreceptor           |
| CCATAAG db/db2  | db/db | 521   | 0.013074 | FALSE | 0.833753 | FALSE | Photoreceptor           |
| CCATAAGC db/db2 | db/db | 4667  | 0.060641 | FALSE | 1.320228 | FALSE | Photoreceptor           |
| CCATAAGT db/db2 | db/db | 2315  | 0.036891 | FALSE | 1.173225 | FALSE | Photoreceptor           |
| CCATCACA db/db2 | db/db | 8694  | 0.025868 | FALSE | 0.591331 | FALSE | Photoreceptor           |
| CCATCACA db/db2 | db/db | 2365  | 0.004275 | FALSE | 1.062129 | FALSE | Neuron                  |
| CCATCACA db/db2 | db/db | 460   | 0.019455 | FALSE | 0.404145 | FALSE | Photoreceptor           |
| CCATCACA db/db2 | db/db | 351   | 0.064568 | FALSE | 15.18738 | TRUE  |                         |
| CCATCACT db/db2 | db/db | 793   | 0.010157 | FALSE | 2.683482 | FALSE | Pericyte                |
| CCCAACTA db/db2 | db/db | 7497  | 0.143776 | TRUE  | 1.411241 | FALSE |                         |
| CCCAACTA db/db2 | db/db | 831   | 0.060641 | FALSE | 2.174397 | FALSE | Endothelia Capillary EC |
| CCCAACTA db/db2 | db/db | 4441  | 0.034954 | FALSE | 0.909569 | FALSE | Endothelia EC-C4        |
| CCCAACTA db/db2 | db/db | 2891  | 0.012814 | FALSE | 1.050773 | FALSE | Endothelia EC-C4        |
| CCCAACTC db/db2 | db/db | 7271  | 0.015581 | FALSE | 0.648322 | FALSE | Photoreceptor           |
| CCCAACTC db/db2 | db/db | 1404  | 0.131994 | TRUE  | 1.902078 | FALSE |                         |
| CCCAACTC db/db2 | db/db | 490   | 0.035586 | FALSE | 28.54251 | TRUE  |                         |
| CCCAACTC db/db2 | db/db | 4096  | 0.038251 | FALSE | 1.034699 | FALSE | Endothelia EC-C4        |
| CCCAACTC db/db2 | db/db | 1054  | 0.023682 | FALSE | 1.730581 | FALSE | Photoreceptor           |
| CCCAACTT db/db2 | db/db | 950   | 0.109375 | TRUE  | 10.50228 | TRUE  |                         |
| CCCATTGT db/db2 | db/db | 4315  | 0.013876 | FALSE | 0.948936 | FALSE | Endothelia EC-C4        |
| CCCGAAGC db/db2 | db/db | 1671  | 0.048732 | FALSE | 1.921161 | FALSE | Endothelia Aterial EC   |
| CCCGAAGT db/db2 | db/db | 8652  | 0.041154 | FALSE | 0.72494  | FALSE | Photoreceptor           |
| CCCGGAAC db/db2 | db/db | 2988  | 0.017434 | FALSE | 1.51163  | FALSE | Endothelia Capillary EC |
| CCCGGAAC db/db2 | db/db | 440   | 0.040404 | FALSE | 1.014034 | FALSE | Microglia               |
| CCCTAACA db/db2 | db/db | 824   | 0.084562 | FALSE | 3.088864 | FALSE | Pericyte                |
| CCCTAACG db/db2 | db/db | 425   | 0.013074 | FALSE | 48.41202 | TRUE  |                         |
| CCCTAACG db/db2 | db/db | 1139  | 0.028754 | FALSE | 1.728305 | FALSE | Neuron                  |
| CCCTAACG db/db2 | db/db | 2396  | 0.023266 | FALSE | 1.370917 | FALSE | Endothelia Venous EC    |
| CCCTCAAA db/db2 | db/db | 483   | 0.013074 | FALSE | 3.111668 | FALSE | Muller cell             |
| CCCTCAAC db/db2 | db/db | 1113  | 0.022857 | FALSE | 1.740197 | FALSE | Endothelia Aterial EC   |
| CCCTCAAG db/db2 | db/db | 3682  | 0.059406 | FALSE | 1.020509 | FALSE | Photoreceptor           |
| CCCTCAAT db/db2 | db/db | 971   | 0.05065  | FALSE | 8.07198  | TRUE  |                         |
| CCCTCAAT db/db2 | db/db | 10328 | 0.017434 | FALSE | 0.557402 | FALSE | Photoreceptor           |
| CCCTCTCA db/db2 | db/db | 4350  | 0.018761 | FALSE | 0.481845 | FALSE | Photoreceptor           |
| CCCTCTCC db/db2 | db/db | 705   | 0.016488 | FALSE | 4.54743  | FALSE | Photoreceptor           |
| CCCTCTCG db/db2 | db/db | 9231  | 0.15354  | TRUE  | 1.600242 | FALSE |                         |
| CCCTCTCT db/db2 | db/db | 844   | 0.03313  | FALSE | 0.971332 | FALSE | Photoreceptor           |
| CCCTGATA db/db2 | db/db | 3966  | 0.036232 | FALSE | 1.130389 | FALSE | Photoreceptor           |
| CCCTGATA db/db2 | db/db | 1308  | 0.031411 | FALSE | 0.86599  | FALSE | Photoreceptor           |
| CCCTGATA db/db2 | db/db | 873   | 0.098234 | FALSE | 4.324947 | FALSE | Muller cell             |
| CCCTGATC db/db2 | db/db | 1759  | 0.076994 | FALSE | 1.414204 | FALSE | Endothelia Venous EC    |
| CCCTGATC db/db2 | db/db | 9974  | 0.014711 | FALSE | 0.282387 | FALSE | Photoreceptor           |
| CCCTGATC db/db2 | db/db | 1040  | 0.023682 | FALSE | 1.913647 | FALSE | Photoreceptor           |
| CCCTGATT db/db2 | db/db | 6965  | 0.017758 | FALSE | 0.51715  | FALSE | Photoreceptor           |



|                 |       |       |          |       |          |       |                        |
|-----------------|-------|-------|----------|-------|----------|-------|------------------------|
| CCCTTAGC db/db2 | db/db | 2141  | 0.027758 | FALSE | 0.83305  | FALSE | Photoreceptor          |
| CCCTTAGC db/db2 | db/db | 2786  | 0.01981  | FALSE | 1.017237 | FALSE | Endothelia Capillary E |
| CCCTTAGC db/db2 | db/db | 2567  | 0.049679 | FALSE | 7.944251 | TRUE  |                        |
| CCCTTAGC db/db2 | db/db | 2027  | 0.018088 | FALSE | 1.326716 | FALSE | Endothelia Capillary E |
| CCCTTAGC db/db2 | db/db | 455   | 0.038251 | FALSE | 0.619147 | FALSE | Photoreceptor          |
| CCCTTAGC db/db2 | db/db | 861   | 0.016488 | FALSE | 2.0528   | FALSE | Endothelia Aterial EC  |
| CCCTTAGC db/db2 | db/db | 9678  | 0.028251 | FALSE | 0.605589 | FALSE | Photoreceptor          |
| CCCTTAGT db/db2 | db/db | 1777  | 0.011805 | FALSE | 0.764134 | FALSE | Endothelia Aterial EC  |
| CCGAACG db/db2  | db/db | 555   | 0.046025 | FALSE | 3.232597 | FALSE | Photoreceptor          |
| CCGAACG db/db2  | db/db | 9577  | 0.014711 | FALSE | 0.725948 | FALSE | Photoreceptor          |
| CCGAACG db/db2  | db/db | 3733  | 0.014711 | FALSE | 1.419008 | FALSE | Photoreceptor          |
| CCGATCTC db/db2 | db/db | 4752  | 0.020536 | FALSE | 0.824731 | FALSE | Photoreceptor          |
| CCGATCTC db/db2 | db/db | 3317  | 0.027273 | FALSE | 0.950257 | FALSE | Photoreceptor          |
| CCGATCTT db/db2 | db/db | 3426  | 0.058205 | FALSE | 0.911076 | FALSE | Endothelia EC-C4       |
| CCGATCTT db/db2 | db/db | 3898  | 0.093319 | FALSE | 1.088695 | FALSE | Endothelia Venous EC   |
| CCGATGG db/db2  | db/db | 446   | 0.038953 | FALSE | 4.81254  | FALSE | Muller cell            |
| CCGATGG db/db2  | db/db | 400   | 0.013074 | FALSE | 0.476376 | FALSE | Photoreceptor          |
| CCGATGG db/db2  | db/db | 922   | 0.080645 | FALSE | 1.147179 | FALSE | Photoreceptor          |
| CCGATGG db/db2  | db/db | 5279  | 0.025868 | FALSE | 0.61165  | FALSE | Photoreceptor          |
| CCGATGG db/db2  | db/db | 4033  | 0.025416 | FALSE | 1.070342 | FALSE | Endothelia Capillary E |
| CCGATGG db/db2  | db/db | 1065  | 0.075259 | FALSE | 4.071145 | FALSE | Muller cell            |
| CCGATGG db/db2  | db/db | 3583  | 0.023266 | FALSE | 0.945528 | FALSE | Endothelia EC-C4       |
| CCGCAAG db/db2  | db/db | 2957  | 0.008234 | FALSE | 0.521013 | FALSE | Neuron                 |
| CCGCAAG db/db2  | db/db | 3354  | 0.022059 | FALSE | 0.999523 | FALSE | Endothelia Venous EC   |
| CCGGACA db/db2  | db/db | 6839  | 0.018422 | FALSE | 1.085975 | FALSE | Photoreceptor          |
| CCGGACA db/db2  | db/db | 2400  | 0.013605 | FALSE | 1.469373 | FALSE | Photoreceptor          |
| CCGGACA db/db2  | db/db | 2819  | 0.048732 | FALSE | 1.241697 | FALSE | Endothelia EC-C4       |
| CCGGACA db/db2  | db/db | 4534  | 0.014151 | FALSE | 1.023313 | FALSE | Endothelia EC-C4       |
| CCGGACA db/db2  | db/db | 3712  | 0.014711 | FALSE | 1.05168  | FALSE | Endothelia Capillary E |
| CCGGACA db/db2  | db/db | 2230  | 0.034334 | FALSE | 1.295612 | FALSE | Endothelia Capillary E |
| CCGGGTA db/db2  | db/db | 2180  | 0.019455 | FALSE | 1.20487  | FALSE | Neuron                 |
| CCGGGTA db/db2  | db/db | 284   | 0.107669 | TRUE  | 4.536489 | FALSE |                        |
| CCGGGTA db/db2  | db/db | 1411  | 0.114671 | TRUE  | 3.292894 | FALSE |                        |
| CCGGTAG db/db2  | db/db | 7470  | 0.068864 | FALSE | 0.854456 | FALSE | Photoreceptor          |
| CCGGTAG db/db2  | db/db | 465   | 0.031973 | FALSE | 38.80597 | TRUE  |                        |
| CCGGTGA db/db2  | db/db | 2035  | 0.073582 | FALSE | 16.42456 | TRUE  |                        |
| CCGGTGA db/db2  | db/db | 295   | 0.103567 | TRUE  | 38.21429 | TRUE  |                        |
| CCGGTGA db/db2  | db/db | 4681  | 0.115723 | TRUE  | 5.322129 | TRUE  |                        |
| CCGGTGA db/db2  | db/db | 1477  | 0.008852 | FALSE | 1.018748 | FALSE | Endothelia Capillary E |
| CCGGTGA db/db2  | db/db | 759   | 0.029266 | FALSE | 3.486475 | FALSE | Muller cell            |
| CCGTAGG db/db2  | db/db | 9070  | 0.026328 | FALSE | 0.561321 | FALSE | Photoreceptor          |
| CCGTAGG db/db2  | db/db | 3494  | 0.008032 | FALSE | 1.654351 | FALSE | Photoreceptor          |
| CCGTAGG db/db2  | db/db | 10377 | 0.022857 | FALSE | 0.621418 | FALSE | Photoreceptor          |
| CCGTAGG db/db2  | db/db | 5576  | 0.088776 | FALSE | 1.167789 | FALSE | Neuron                 |
| CCGTGAG db/db2  | db/db | 6393  | 0.034334 | FALSE | 0.719225 | FALSE | Photoreceptor          |
| CCGTGAG db/db2  | db/db | 401   | 0.036232 | FALSE | 24.41315 | TRUE  |                        |
| CCGTTCAC db/db2 | db/db | 4883  | 0.118221 | TRUE  | 2.324187 | FALSE |                        |

|                  |       |      |          |       |          |       |                        |
|------------------|-------|------|----------|-------|----------|-------|------------------------|
| CCGTTAC db/db2   | db/db | 4926 | 0.019455 | FALSE | 0.510947 | FALSE | Photoreceptor          |
| CCGTTACAT db/db2 | db/db | 650  | 0.054795 | FALSE | 22.633   | TRUE  |                        |
| CCGTTACAT db/db2 | db/db | 384  | 0.046025 | FALSE | 23.1096  | TRUE  |                        |
| CCTAACCA db/db2  | db/db | 474  | 0.026328 | FALSE | 1.322391 | FALSE | Photoreceptor          |
| CCTAACCA db/db2  | db/db | 1752 | 0.011561 | FALSE | 1.846218 | FALSE | Photoreceptor          |
| CCTAACCC db/db2  | db/db | 549  | 0.049679 | FALSE | 2.032965 | FALSE | Muller cell            |
| CCTAACCC db/db2  | db/db | 2179 | 0.063221 | FALSE | 12.63135 | TRUE  |                        |
| CCTAACCG db/db2  | db/db | 3206 | 0.007636 | FALSE | 0.993403 | FALSE | Endothelia Capillary E |
| CCTAAGAC db/db2  | db/db | 5614 | 0.040404 | FALSE | 1.010126 | FALSE | Photoreceptor          |
| CCTAAGAC db/db2  | db/db | 2569 | 0.078788 | FALSE | 1.822959 | FALSE | Photoreceptor          |
| CCTAAGAT db/db2  | db/db | 2551 | 0.030859 | FALSE | 1.132076 | FALSE | Endothelia Capillary E |
| CCTACGTA db/db2  | db/db | 5186 | 0.093319 | FALSE | 0.962947 | FALSE | Neuron                 |
| CCTACGTA db/db2  | db/db | 7057 | 0.022059 | FALSE | 1.03693  | FALSE | Photoreceptor          |
| CCTACGTC db/db2  | db/db | 8595 | 0.024105 | FALSE | 0.757566 | FALSE | Photoreceptor          |
| CCTACGTC db/db2  | db/db | 1159 | 0.049679 | FALSE | 1.50997  | FALSE | Photoreceptor          |
| CCTACGTC db/db2  | db/db | 1522 | 0.014151 | FALSE | 1.887397 | FALSE | Endothelia Capillary E |
| CCTACGTT db/db2  | db/db | 5348 | 0.029787 | FALSE | 0.910377 | FALSE | Endothelia Venous EC   |
| CCTATCGC db/db2  | db/db | 409  | 0.018761 | FALSE | 4.426518 | FALSE | Muller cell            |
| CCTATCGC db/db2  | db/db | 2322 | 0.055901 | FALSE | 1.40442  | FALSE | Photoreceptor          |
| CCTATCGC db/db2  | db/db | 6049 | 0.043505 | FALSE | 1.126364 | FALSE | Endothelia Capillary E |
| CCTATCGT db/db2  | db/db | 1005 | 0.017114 | FALSE | 1.911563 | FALSE | Endothelia Capillary E |
| CCTATCGT db/db2  | db/db | 2417 | 0.026796 | FALSE | 1.138911 | FALSE | Endothelia EC-C4       |
| CCTATCGT db/db2  | db/db | 3239 | 0.022857 | FALSE | 1.109345 | FALSE | Photoreceptor          |
| CCTCAACA db/db2  | db/db | 895  | 0.095727 | FALSE | 1.310883 | FALSE | Endothelia Capillary E |
| CCTCAACC db/db2  | db/db | 3830 | 0.044326 | FALSE | 0.904825 | FALSE | Photoreceptor          |
| CCTCAACG db/db2  | db/db | 1399 | 0.070386 | FALSE | 2.775148 | FALSE | Muller cell            |
| CCTCACAG db/db2  | db/db | 3796 | 0.098234 | FALSE | 10.92465 | TRUE  |                        |
| CCTCAGTC db/db2  | db/db | 6963 | 0.031411 | FALSE | 0.900545 | FALSE | Photoreceptor          |
| CCTCAGTC db/db2  | db/db | 2433 | 0.036232 | FALSE | 1.320157 | FALSE | Endothelia Capillary E |
| CCTCAGTC db/db2  | db/db | 9582 | 0.023682 | FALSE | 0.618249 | FALSE | Photoreceptor          |
| CCTCAGTT db/db2  | db/db | 291  | 0.030318 | FALSE | 41.55172 | TRUE  |                        |
| CCTCAGTT db/db2  | db/db | 6261 | 0.020171 | FALSE | 0.764292 | FALSE | Photoreceptor          |
| CCTCATGA db/db2  | db/db | 715  | 0.023682 | FALSE | 2.447513 | FALSE | Neuron                 |
| CCTCATGT db/db2  | db/db | 5855 | 0.030318 | FALSE | 0.894042 | FALSE | Photoreceptor          |
| CCTCATGT db/db2  | db/db | 2739 | 0.108718 | TRUE  | 2.241057 | FALSE |                        |
| CCTCCAAC db/db2  | db/db | 6753 | 0.021286 | FALSE | 0.776219 | FALSE | Photoreceptor          |
| CCTCCAAG db/db2  | db/db | 409  | 0.010157 | FALSE | 1.602976 | FALSE | Photoreceptor          |
| CCTCCAAG db/db2  | db/db | 550  | 0.184701 | TRUE  | 13.19053 | TRUE  |                        |
| CCTCCTCA db/db2  | db/db | 4087 | 0.057037 | FALSE | 1.146661 | FALSE | Photoreceptor          |
| CCTCCTCC db/db2  | db/db | 416  | 0.043505 | FALSE | 3.9692   | FALSE | Endothelia Capillary E |
| CCTCCTCC db/db2  | db/db | 1188 | 0.029266 | FALSE | 0.627805 | FALSE | Photoreceptor          |
| CCTCCTCC db/db2  | db/db | 317  | 0.049679 | FALSE | 47.43935 | TRUE  |                        |
| CCTCCTCG db/db2  | db/db | 485  | 0.045165 | FALSE | 41.59292 | TRUE  |                        |
| CCTCCTCG db/db2  | db/db | 3292 | 0.025868 | FALSE | 1.308668 | FALSE | Endothelia Capillary E |
| CCTCCTCT db/db2  | db/db | 510  | 0.028251 | FALSE | 3.661246 | FALSE | Endothelia Capillary E |
| CCTCCTCT db/db2  | db/db | 2081 | 0.049679 | FALSE | 1.773144 | FALSE | Photoreceptor          |
| CCTCTAGA db/db2  | db/db | 2233 | 0.035586 | FALSE | 1.6925   | FALSE | Pericyte               |

|                 |       |      |          |       |          |       |                        |
|-----------------|-------|------|----------|-------|----------|-------|------------------------|
| CCTCTAGC db/db2 | db/db | 596  | 0.078788 | FALSE | 4.596828 | FALSE | Muller cell            |
| CCTCTAGC db/db2 | db/db | 1335 | 0.028754 | FALSE | 1.774734 | FALSE | Endothelia Capillary E |
| CCTCTAGC db/db2 | db/db | 3497 | 0.051646 | FALSE | 1.571869 | FALSE | Photoreceptor          |
| CCTCTAGT db/db2 | db/db | 4424 | 0.036891 | FALSE | 1.080509 | FALSE | Endothelia Capillary E |
| CCTCTAGT db/db2 | db/db | 387  | 0.052669 | FALSE | 0.929747 | FALSE | Endothelia Capillary E |
| CCTCTCCG db/db2 | db/db | 454  | 0.011319 | FALSE | 1.768269 | FALSE | Muller cell            |
| CCTCTCCG db/db2 | db/db | 4760 | 0.065957 | FALSE | 1.402403 | FALSE | Photoreceptor          |
| CCTCTCCT db/db2 | db/db | 6537 | 0.021286 | FALSE | 0.916002 | FALSE | Photoreceptor          |
| CCTGCATC db/db2 | db/db | 406  | 0.043505 | FALSE | 25.17289 | TRUE  |                        |
| CCTGCATC db/db2 | db/db | 658  | 0.048732 | FALSE | 4.6531   | FALSE | Muller cell            |
| CCTGCATC db/db2 | db/db | 8211 | 0.035586 | FALSE | 0.783552 | FALSE | Photoreceptor          |
| CCTGTTGC db/db2 | db/db | 367  | 0.060641 | FALSE | 39.94846 | TRUE  |                        |
| CCTTCAGA db/db2 | db/db | 1344 | 0.071958 | FALSE | 2.099262 | FALSE | Endothelia Capillary E |
| CCTTCAGA db/db2 | db/db | 2242 | 0.023682 | FALSE | 1.317004 | FALSE | Endothelia Capillary E |
| CCTTCAGA db/db2 | db/db | 2363 | 0.051646 | FALSE | 0.928797 | FALSE | Neuron                 |
| CCTTCAGT db/db2 | db/db | 717  | 0.012814 | FALSE | 2.55141  | FALSE | Endothelia Capillary E |
| CCTTGTGA db/db2 | db/db | 978  | 0.026796 | FALSE | 2.162219 | FALSE | Neuron                 |
| CCTTGTGA db/db2 | db/db | 1557 | 0.046025 | FALSE | 0.692321 | FALSE | Photoreceptor          |
| CCTTGTGA db/db2 | db/db | 3458 | 0.021669 | FALSE | 0.923082 | FALSE | Endothelia Capillary E |
| CCTTGTGC db/db2 | db/db | 930  | 0.046906 | FALSE | 2.399844 | FALSE | Endothelia Capillary E |
| CCTTGTGC db/db2 | db/db | 3673 | 0.135645 | TRUE  | 4.038083 | FALSE |                        |
| CCTTTGGA db/db2 | db/db | 3400 | 0.024105 | FALSE | 1.225996 | FALSE | Endothelia Capillary E |
| CCTTTGGA db/db2 | db/db | 5313 | 0.026796 | FALSE | 0.912398 | FALSE | Photoreceptor          |
| CCTTTGGA db/db2 | db/db | 4062 | 0.044326 | FALSE | 0.809445 | FALSE | Photoreceptor          |
| CCTTTGGC db/db2 | db/db | 466  | 0.034954 | FALSE | 3.243366 | FALSE | Muller cell            |
| CCTTTGGC db/db2 | db/db | 5398 | 0.045165 | FALSE | 1.171015 | FALSE | Photoreceptor          |
| CGAAGGA db/db2  | db/db | 441  | 0.01981  | FALSE | 3.590868 | FALSE | Endothelia Capillary E |
| CGAAGGA db/db2  | db/db | 625  | 0.064568 | FALSE | 1.032639 | FALSE | Neuron                 |
| CGAAGGA db/db2  | db/db | 2892 | 0.020908 | FALSE | 1.571411 | FALSE | Endothelia Capillary E |
| CGAAGGA db/db2  | db/db | 2205 | 0.061912 | FALSE | 1.328708 | FALSE | Endothelia Venous EC   |
| CGAAGTT db/db2  | db/db | 6174 | 0.065957 | FALSE | 0.973738 | FALSE | Neuron                 |
| CGAAGTT db/db2  | db/db | 9788 | 0.013074 | FALSE | 0.597356 | FALSE | Photoreceptor          |
| CGAAGTT db/db2  | db/db | 468  | 0.024971 | FALSE | 3.249028 | FALSE | Muller cell            |
| CGAAGTT db/db2  | db/db | 2970 | 0.051646 | FALSE | 0.973847 | FALSE | Photoreceptor          |
| CGAATTG db/db2  | db/db | 826  | 0.051646 | FALSE | 3.085594 | FALSE | Photoreceptor          |
| CGAATTG db/db2  | db/db | 9254 | 0.021286 | FALSE | 0.684341 | FALSE | Photoreceptor          |
| CGAATTG db/db2  | db/db | 152  | 0.023682 | FALSE | 74.38495 | TRUE  |                        |
| CGACAGC db/db2  | db/db | 2728 | 0.026328 | FALSE | 1.401417 | FALSE | Endothelia Venous EC   |
| CGACAGC db/db2  | db/db | 2638 | 0.022455 | FALSE | 1.37912  | FALSE | Endothelia EC-C4       |
| CGACAGC db/db2  | db/db | 3943 | 0.042704 | FALSE | 1.470112 | FALSE | Photoreceptor          |
| CGACAGC db/db2  | db/db | 7656 | 0.01981  | FALSE | 0.746494 | FALSE | Photoreceptor          |
| CGAGAAG db/db2  | db/db | 1102 | 0.054795 | FALSE | 0.521152 | FALSE | Photoreceptor          |
| CGAGAAG db/db2  | db/db | 213  | 0.106646 | TRUE  | 0.180995 | FALSE |                        |
| CGAGGAA db/db2  | db/db | 358  | 0.01981  | FALSE | 4.889598 | FALSE | Muller cell            |
| CGAGGAA db/db2  | db/db | 2866 | 0.043505 | FALSE | 1.002436 | FALSE | Photoreceptor          |
| CGAGGAA db/db2  | db/db | 3493 | 0.019106 | FALSE | 1.009226 | FALSE | Endothelia EC-C4       |
| CGAGGAA db/db2  | db/db | 2157 | 0.095727 | FALSE | 6.479532 | TRUE  |                        |

|                 |       |      |          |       |          |       |                        |
|-----------------|-------|------|----------|-------|----------|-------|------------------------|
| CGAGGAA db/db2  | db/db | 5777 | 0.049679 | FALSE | 1.361348 | FALSE | Neuron                 |
| CGAGGCT db/db2  | db/db | 2888 | 0.017114 | FALSE | 1.044341 | FALSE | Endothelia Capillary E |
| CGAGGCT db/db2  | db/db | 4097 | 0.065957 | FALSE | 1.328084 | FALSE | Endothelia EC-C4       |
| CGAGGCT db/db2  | db/db | 687  | 0.088776 | FALSE | 1.873206 | FALSE | Endothelia Capillary E |
| CGAGGCT db/db2  | db/db | 1018 | 0.024534 | FALSE | 2.307282 | FALSE | Photoreceptor          |
| CGAGGCT db/db2  | db/db | 1671 | 0.059406 | FALSE | 1.263801 | FALSE | Photoreceptor          |
| CGAGTGC db/db2  | db/db | 549  | 0.088776 | FALSE | 2.633983 | FALSE | Muller cell            |
| CGAGTGC db/db2  | db/db | 1051 | 0.023682 | FALSE | 2.10199  | FALSE | Neuron                 |
| CGAGTGC db/db2  | db/db | 7576 | 0.019106 | FALSE | 0.952049 | FALSE | Photoreceptor          |
| CGAGTGC db/db2  | db/db | 1019 | 0.01981  | FALSE | 0.297082 | FALSE | Photoreceptor          |
| CGAGTGC db/db2  | db/db | 1838 | 0.009277 | FALSE | 1.467625 | FALSE | Endothelia Capillary E |
| CGAGTTA db/db2  | db/db | 288  | 0.034954 | FALSE | 58.94988 | TRUE  |                        |
| CGAGTTA db/db2  | db/db | 2449 | 0.009712 | FALSE | 1.044132 | FALSE | Endothelia Capillary E |
| CGAGTTA db/db2  | db/db | 1974 | 0.046025 | FALSE | 1.16331  | FALSE | Photoreceptor          |
| CGAGTTA db/db2  | db/db | 1598 | 0.055901 | FALSE | 1.609491 | FALSE | Pericyte               |
| CGAGTTA db/db2  | db/db | 502  | 0.007833 | FALSE | 0        | FALSE | Muller cell            |
| CGATCGG db/db2  | db/db | 7010 | 0.019455 | FALSE | 0.659615 | FALSE | Photoreceptor          |
| CGATCGG db/db2  | db/db | 5149 | 0.03313  | FALSE | 1.155032 | FALSE | Photoreceptor          |
| CGATGCG db/db2  | db/db | 995  | 0.065957 | FALSE | 2.731905 | FALSE | Endothelia Aterial EC  |
| CGATGCG db/db2  | db/db | 2828 | 0.019106 | FALSE | 1.247182 | FALSE | Endothelia Capillary E |
| CGATGCG db/db2  | db/db | 3467 | 0.024534 | FALSE | 1.028748 | FALSE | Endothelia Venous EC   |
| CGATGCG db/db2  | db/db | 1229 | 0.005958 | FALSE | 1.319745 | FALSE | Endothelia Capillary E |
| CGATGGC db/db2  | db/db | 4805 | 0.024105 | FALSE | 0.878347 | FALSE | Endothelia EC-C4       |
| CGATGGC db/db2  | db/db | 1504 | 0.014997 | FALSE | 1.24281  | FALSE | Endothelia Capillary E |
| CGATGGC db/db2  | db/db | 2708 | 0.014151 | FALSE | 1.403776 | FALSE | Photoreceptor          |
| CGATGGC db/db2  | db/db | 740  | 0.029787 | FALSE | 1.638572 | FALSE | Endothelia Capillary E |
| CGCAGGT db/db2  | db/db | 2544 | 0.028754 | FALSE | 1.321886 | FALSE | Endothelia Capillary E |
| CGCAGGT db/db2  | db/db | 3716 | 0.028754 | FALSE | 1.078894 | FALSE | Endothelia Venous EC   |
| CGCATAA db/db2  | db/db | 1450 | 0.133788 | TRUE  | 3.693065 | FALSE |                        |
| CGCATAA db/db2  | db/db | 1853 | 0.082569 | FALSE | 1.127082 | FALSE | Photoreceptor          |
| CGCATAA db/db2  | db/db | 587  | 0.24     | TRUE  | 13.04348 | TRUE  |                        |
| CGCATAA db/db2  | db/db | 2495 | 0.017434 | FALSE | 1.281848 | FALSE | Endothelia Capillary E |
| CGCATAA db/db2  | db/db | 2104 | 0.008644 | FALSE | 1.372788 | FALSE | Endothelia Capillary E |
| CGCATGG db/db2  | db/db | 3632 | 0.026328 | FALSE | 0.985379 | FALSE | Endothelia EC-C4       |
| CGCATGG db/db2  | db/db | 533  | 0.021286 | FALSE | 3.031271 | FALSE | Endothelia Capillary E |
| CGCCAGA db/db2  | db/db | 8079 | 0.041154 | FALSE | 0.903422 | FALSE | Photoreceptor          |
| CGCCAGA db/db2  | db/db | 1237 | 0.060641 | FALSE | 1.553825 | FALSE | Photoreceptor          |
| CGCCAGA db/db2  | db/db | 2048 | 0.020908 | FALSE | 2.398293 | FALSE | Neuron                 |
| CGCCAGA db/db2  | db/db | 437  | 0.071958 | FALSE | 9.904154 | TRUE  |                        |
| CGCCAGA db/db2  | db/db | 2061 | 0.082569 | FALSE | 1.835819 | FALSE | Photoreceptor          |
| CGCCAGA db/db2  | db/db | 9155 | 0.029787 | FALSE | 0.681192 | FALSE | Photoreceptor          |
| CGCCAGA db/db2  | db/db | 572  | 0.084562 | FALSE | 3.263151 | FALSE | Photoreceptor          |
| CGCCATTC db/db2 | db/db | 4775 | 0.017758 | FALSE | 1.024036 | FALSE | Endothelia Venous EC   |
| CGCCATTC db/db2 | db/db | 1952 | 0.445833 | TRUE  | 10.03948 | TRUE  |                        |
| CGCCATTT db/db2 | db/db | 1421 | 0.091004 | FALSE | 2.644555 | FALSE | Photoreceptor          |
| CGCGTGA db/db2  | db/db | 1829 | 0.057037 | FALSE | 1.28254  | FALSE | Photoreceptor          |
| CGCGTGA db/db2  | db/db | 1092 | 0.029787 | FALSE | 4.304015 | FALSE | Muller cell            |

|           |        |       |       |          |       |          |       |                        |
|-----------|--------|-------|-------|----------|-------|----------|-------|------------------------|
| CGCGTGA/d | db/db2 | db/db | 1799  | 0.038251 | FALSE | 3.130198 | FALSE | Muller cell            |
| CGCGTGA(d | db/db2 | db/db | 5359  | 0.023682 | FALSE | 0.993457 | FALSE | Endothelia Venous EC   |
| CGCGTGA1  | db/db2 | db/db | 283   | 0.017434 | FALSE | 68.93124 | TRUE  |                        |
| CGGAACCC/ | db/db2 | db/db | 1318  | 0.007833 | FALSE | 1.697549 | FALSE | Pericyte               |
| CGGAACCC( | db/db2 | db/db | 8738  | 0.043505 | FALSE | 0.783811 | FALSE | Photoreceptor          |
| CGGAACCC( | db/db2 | db/db | 560   | 0.076994 | FALSE | 25.02343 | TRUE  |                        |
| CGGAACCC( | db/db2 | db/db | 946   | 0.054795 | FALSE | 1.884369 | FALSE | Photoreceptor          |
| CGGAACCC1 | db/db2 | db/db | 394   | 0.024971 | FALSE | 37.36527 | TRUE  |                        |
| CGGAATT/  | db/db2 | db/db | 8344  | 0.034334 | FALSE | 0.832417 | FALSE | Photoreceptor          |
| CGGAATT/  | db/db2 | db/db | 6931  | 0.016488 | FALSE | 1.049891 | FALSE | Photoreceptor          |
| CGGAATT(  | db/db2 | db/db | 3590  | 0.015287 | FALSE | 0.729777 | FALSE | Photoreceptor          |
| CGGAATT(  | db/db2 | db/db | 4207  | 0.015879 | FALSE | 1.06605  | FALSE | Endothelia Venous EC   |
| CGGAATT(  | db/db2 | db/db | 4066  | 0.031973 | FALSE | 1.090471 | FALSE | Photoreceptor          |
| CGGAATT1  | db/db2 | db/db | 3944  | 0.020908 | FALSE | 1.022426 | FALSE | Endothelia Capillary E |
| CGGACAC(  | db/db2 | db/db | 716   | 0.049679 | FALSE | 0.505335 | FALSE | Photoreceptor          |
| CGGACAC(  | db/db2 | db/db | 2748  | 0.082569 | FALSE | 17.76836 | TRUE  |                        |
| CGGAGAA.  | db/db2 | db/db | 2013  | 0.076994 | FALSE | 2.999192 | FALSE | Muller cell            |
| CGGAGAA.  | db/db2 | db/db | 511   | 0.093319 | FALSE | 4.889531 | FALSE | Muller cell            |
| CGGAGAA.  | db/db2 | db/db | 1282  | 0.026796 | FALSE | 2.183992 | FALSE | Endothelia EC-C4       |
| CGGAGAA/  | db/db2 | db/db | 3867  | 0.177638 | TRUE  | 4.231405 | FALSE |                        |
| CGGAGAA/  | db/db2 | db/db | 1604  | 0.011081 | FALSE | 1.030124 | FALSE | Endothelia Capillary E |
| CGGCAGT/  | db/db2 | db/db | 2882  | 0.013605 | FALSE | 1.051507 | FALSE | Endothelia Venous EC   |
| CGGCAGT(  | db/db2 | db/db | 5796  | 0.043505 | FALSE | 0.928051 | FALSE | Endothelia Venous EC   |
| CGGGACT1  | db/db2 | db/db | 2822  | 0.100165 | TRUE  | 1.576431 | FALSE |                        |
| CGGGCAT/  | db/db2 | db/db | 6197  | 0.115723 | TRUE  | 3.193048 | FALSE |                        |
| CGGGCAT/  | db/db2 | db/db | 503   | 0.011561 | FALSE | 2.739655 | FALSE | Muller cell            |
| CGGGCAT(  | db/db2 | db/db | 6169  | 0.020908 | FALSE | 0.975204 | FALSE | Endothelia EC-C4       |
| CGGGCAT(  | db/db2 | db/db | 436   | 0.034334 | FALSE | 0.875114 | FALSE | Photoreceptor          |
| CGGGCAT(  | db/db2 | db/db | 592   | 0.047807 | FALSE | 4.883191 | FALSE | Muller cell            |
| CGGGCAT1  | db/db2 | db/db | 721   | 0.044326 | FALSE | 6.591337 | TRUE  |                        |
| CGGGCAT1  | db/db2 | db/db | 875   | 0.038251 | FALSE | 1.565348 | FALSE | Photoreceptor          |
| CGGGTCA(  | db/db2 | db/db | 10223 | 0.017758 | FALSE | 0.539229 | FALSE | Photoreceptor          |
| CGGGTGT/  | db/db2 | db/db | 4086  | 0.033726 | FALSE | 1.186082 | FALSE | Endothelia EC-C4       |
| CGGGTGT/  | db/db2 | db/db | 1089  | 0.039671 | FALSE | 2.533627 | FALSE | Pericyte               |
| CGGGTGT1  | db/db2 | db/db | 429   | 0.057037 | FALSE | 0.222759 | FALSE | Neuron                 |
| CGGGTGT1  | db/db2 | db/db | 2238  | 0.016181 | FALSE | 0.694168 | FALSE | Endothelia EC-C4       |
| CGGTCAG(  | db/db2 | db/db | 569   | 0.021669 | FALSE | 3.786886 | FALSE | Muller cell            |
| CGGTCAG(  | db/db2 | db/db | 3639  | 0.146004 | TRUE  | 2.03258  | FALSE |                        |
| CGGTCAG(  | db/db2 | db/db | 848   | 0.029787 | FALSE | 2.381964 | FALSE | Muller cell            |
| CGTAAGT(  | db/db2 | db/db | 402   | 0.020536 | FALSE | 1.148534 | FALSE | Endothelia Capillary E |
| CGTAATG(  | db/db2 | db/db | 373   | 0.020536 | FALSE | 4.321021 | FALSE | Muller cell            |
| CGTAATG(  | db/db2 | db/db | 2822  | 0.021286 | FALSE | 0.929616 | FALSE | Endothelia Venous EC   |
| CGTAATG(  | db/db2 | db/db | 3131  | 0.009712 | FALSE | 1.260022 | FALSE | Photoreceptor          |
| CGTAGTA/  | db/db2 | db/db | 2101  | 0.012557 | FALSE | 0.246838 | FALSE | Photoreceptor          |
| CGTAGTA1  | db/db2 | db/db | 9390  | 0.080645 | FALSE | 0.751392 | FALSE | Photoreceptor          |
| CGTCAAA/  | db/db2 | db/db | 1138  | 0.013074 | FALSE | 1.247071 | FALSE | Endothelia Capillary E |
| CGTCAAA/  | db/db2 | db/db | 1812  | 0.006317 | FALSE | 1.356315 | FALSE | Pericyte               |

|                 |       |      |          |       |          |       |                        |
|-----------------|-------|------|----------|-------|----------|-------|------------------------|
| CGTCAAA/ db/db2 | db/db | 1792 | 0.008852 | FALSE | 1.744545 | FALSE | Endothelia Capillary E |
| CGTCAAA( db/db2 | db/db | 999  | 0.049679 | FALSE | 1.462283 | FALSE | Photoreceptor          |
| CGTCAAA( db/db2 | db/db | 5698 | 0.021669 | FALSE | 0.808203 | FALSE | Photoreceptor          |
| CGTCAAA( db/db2 | db/db | 4477 | 0.017434 | FALSE | 0.911305 | FALSE | Endothelia Venous EC   |
| CGTCAAA( db/db2 | db/db | 2662 | 0.057037 | FALSE | 0.726514 | FALSE | Photoreceptor          |
| CGTCAAA( db/db2 | db/db | 2200 | 0.041154 | FALSE | 1.371111 | FALSE | Neuron                 |
| CGTCAAA( db/db2 | db/db | 401  | 0.068864 | FALSE | 5.510535 | TRUE  |                        |
| CGTCCATC db/db2 | db/db | 635  | 0.053718 | FALSE | 1.557711 | FALSE | Photoreceptor          |
| CGTCCATC db/db2 | db/db | 2166 | 0.032546 | FALSE | 1.518285 | FALSE | Endothelia Capillary E |
| CGTCCATC db/db2 | db/db | 2663 | 0.046025 | FALSE | 1.255217 | FALSE | Endothelia Aterial EC  |
| CGTCCATC db/db2 | db/db | 4134 | 0.164835 | TRUE  | 3.482678 | FALSE |                        |
| CGTGAAT/ db/db2 | db/db | 1363 | 0.011805 | FALSE | 1.218117 | FALSE | Endothelia Capillary E |
| CGTGAAT/ db/db2 | db/db | 942  | 0.060641 | FALSE | 41.00279 | TRUE  |                        |
| CGTGAAT( db/db2 | db/db | 1346 | 0.084562 | FALSE | 2.404352 | FALSE | Photoreceptor          |
| CGTGAAT( db/db2 | db/db | 966  | 0.057037 | FALSE | 1.952513 | FALSE | Photoreceptor          |
| CGTGAATT db/db2 | db/db | 957  | 0.034334 | FALSE | 0.51159  | FALSE | Endothelia EC-C4       |
| CGTGAATT db/db2 | db/db | 1503 | 0.045165 | FALSE | 1.347512 | FALSE | Photoreceptor          |
| CGTGATA/ db/db2 | db/db | 1034 | 0.065957 | FALSE | 1.2238   | FALSE | Photoreceptor          |
| CGTGATA/ db/db2 | db/db | 1289 | 0.024971 | FALSE | 0.267512 | FALSE | Photoreceptor          |
| CGTGATA/ db/db2 | db/db | 5153 | 0.024971 | FALSE | 1.111464 | FALSE | Endothelia Venous EC   |
| CGTGCTTA db/db2 | db/db | 799  | 0.068864 | FALSE | 1.851595 | FALSE | Photoreceptor          |
| CGTGCTTA db/db2 | db/db | 740  | 0.065957 | FALSE | 30.65457 | TRUE  |                        |
| CGTGCTTA db/db2 | db/db | 1143 | 0.057037 | FALSE | 1.384903 | FALSE | Photoreceptor          |
| CGTGCTTA db/db2 | db/db | 5766 | 0.192271 | TRUE  | 3.93229  | FALSE |                        |
| CGTGCTTC db/db2 | db/db | 811  | 0.049679 | FALSE | 0.772326 | FALSE | Photoreceptor          |
| CGTGCTTT db/db2 | db/db | 9404 | 0.020908 | FALSE | 0.510353 | FALSE | Photoreceptor          |
| CGTGTCTC db/db2 | db/db | 865  | 0.218615 | TRUE  | 6.358819 | TRUE  |                        |
| CGTGTCTC db/db2 | db/db | 1232 | 0.024534 | FALSE | 0.402455 | FALSE | Photoreceptor          |
| CGTGTCTC db/db2 | db/db | 599  | 0.041154 | FALSE | 3.115464 | FALSE | Pericyte               |
| CGTGTCTT db/db2 | db/db | 601  | 0.005607 | FALSE | 2.105212 | FALSE | Muller cell            |
| CGTTAGA/ db/db2 | db/db | 791  | 0.061912 | FALSE | 1.473716 | FALSE | Photoreceptor          |
| CGTTAGA/ db/db2 | db/db | 2448 | 0.015581 | FALSE | 1.310439 | FALSE | Endothelia Venous EC   |
| CGTTAGA( db/db2 | db/db | 1427 | 0.049679 | FALSE | 0.627756 | FALSE | Neuron                 |
| CGTTAGA( db/db2 | db/db | 519  | 0.095727 | FALSE | 12.57485 | TRUE  |                        |
| CGTTAGA( db/db2 | db/db | 4888 | 0.024105 | FALSE | 0.92143  | FALSE | Photoreceptor          |
| CGTTAGA( db/db2 | db/db | 1863 | 0.063221 | FALSE | 0.60831  | FALSE | Photoreceptor          |
| CGTTAGA( db/db2 | db/db | 1593 | 0.015879 | FALSE | 1.477431 | FALSE | Endothelia Capillary E |
| CGTTCTGA db/db2 | db/db | 6167 | 0.026328 | FALSE | 0.803477 | FALSE | Photoreceptor          |
| CGTTCTGC db/db2 | db/db | 8729 | 0.014429 | FALSE | 0.643282 | FALSE | Photoreceptor          |
| CGTTCTGT db/db2 | db/db | 548  | 0.075259 | FALSE | 3.907923 | FALSE | Muller cell            |
| CGTTGGG/ db/db2 | db/db | 427  | 0.052669 | FALSE | 2.857697 | FALSE | Muller cell            |
| CTAACTTA db/db2 | db/db | 8623 | 0.03313  | FALSE | 0.7684   | FALSE | Photoreceptor          |
| CTAACTTC db/db2 | db/db | 1801 | 0.031411 | FALSE | 0.931777 | FALSE | Photoreceptor          |
| CTAAGTG( db/db2 | db/db | 2954 | 0.009712 | FALSE | 1.068712 | FALSE | Endothelia Capillary E |
| CTAAGTG( db/db2 | db/db | 2707 | 0.008644 | FALSE | 0.898771 | FALSE | Endothelia EC-C4       |
| CTAAGTGT db/db2 | db/db | 2355 | 0.025868 | FALSE | 1.190282 | FALSE | Endothelia EC-C4       |
| CTACAGA/ db/db2 | db/db | 349  | 0.030859 | FALSE | 29.6     | TRUE  |                        |

|                 |       |       |          |       |          |       |                        |
|-----------------|-------|-------|----------|-------|----------|-------|------------------------|
| CTACAGAA db/db2 | db/db | 4646  | 0.045165 | FALSE | 1.153236 | FALSE | Endothelia EC-C4       |
| CTACAGAC db/db2 | db/db | 1715  | 0.020908 | FALSE | 1.160444 | FALSE | Endothelia Capillary E |
| CTACAGAC db/db2 | db/db | 1546  | 0.024971 | FALSE | 1.761766 | FALSE | Endothelia Venous EC   |
| CTACAGAT db/db2 | db/db | 4151  | 0.023682 | FALSE | 0.867055 | FALSE | Endothelia Aterial EC  |
| CTACAGAT db/db2 | db/db | 401   | 0.059406 | FALSE | 1.410431 | FALSE | Photoreceptor          |
| CTACAGAT db/db2 | db/db | 1792  | 0.022059 | FALSE | 1.109081 | FALSE | Endothelia EC-C4       |
| CTACATTG db/db2 | db/db | 1825  | 0.015287 | FALSE | 1.350804 | FALSE | Photoreceptor          |
| CTACATTG db/db2 | db/db | 4974  | 0.028754 | FALSE | 1.064852 | FALSE | Photoreceptor          |
| CTACATTT db/db2 | db/db | 1090  | 0.091004 | FALSE | 2.84367  | FALSE | Muller cell            |
| CTACCCAA db/db2 | db/db | 480   | 0.018422 | FALSE | 1.937265 | FALSE | Endothelia Capillary E |
| CTACCCAC db/db2 | db/db | 4475  | 0.030859 | FALSE | 0.983143 | FALSE | Endothelia Venous EC   |
| CTACCCAG db/db2 | db/db | 1683  | 0.018088 | FALSE | 0.866516 | FALSE | Photoreceptor          |
| CTACCCAT db/db2 | db/db | 1093  | 0.025416 | FALSE | 1.644867 | FALSE | Photoreceptor          |
| CTACCTGA db/db2 | db/db | 6335  | 0.038953 | FALSE | 1.014158 | FALSE | Endothelia EC-C4       |
| CTACCTGA db/db2 | db/db | 3921  | 0.037564 | FALSE | 1.065555 | FALSE | Photoreceptor          |
| CTACCTGC db/db2 | db/db | 537   | 0.063221 | FALSE | 2.581563 | FALSE | Endothelia Capillary E |
| CTACCTGC db/db2 | db/db | 4155  | 0.052669 | FALSE | 1.148093 | FALSE | Photoreceptor          |
| CTACCTGT db/db2 | db/db | 1623  | 0.011805 | FALSE | 1.019004 | FALSE | Endothelia Capillary E |
| CTACGGGA db/db2 | db/db | 909   | 0.024971 | FALSE | 1.449991 | FALSE | Photoreceptor          |
| CTACGGGA db/db2 | db/db | 1162  | 0.014429 | FALSE | 0.072735 | FALSE | Photoreceptor          |
| CTACGGGA db/db2 | db/db | 2459  | 0.018088 | FALSE | 1.34105  | FALSE | Endothelia Venous EC   |
| CTACGGGA db/db2 | db/db | 822   | 0.055901 | FALSE | 0.720214 | FALSE | Photoreceptor          |
| CTACGGGA db/db2 | db/db | 1654  | 0.007636 | FALSE | 1.360235 | FALSE | Endothelia Capillary E |
| CTACGGGA db/db2 | db/db | 3124  | 0.038953 | FALSE | 0.990989 | FALSE | Endothelia EC-C4       |
| CTACGGGA db/db2 | db/db | 2815  | 0.043505 | FALSE | 0.870333 | FALSE | Endothelia EC-C4       |
| CTACGGGA db/db2 | db/db | 10046 | 0.028251 | FALSE | 0.587371 | FALSE | Photoreceptor          |
| CTACTATA db/db2 | db/db | 4563  | 0.012814 | FALSE | 0.946334 | FALSE | Endothelia Capillary E |
| CTACTATA db/db2 | db/db | 4324  | 0.015581 | FALSE | 0.984544 | FALSE | Photoreceptor          |
| CTACTATC db/db2 | db/db | 2854  | 0.029266 | FALSE | 1.23054  | FALSE | Endothelia Aterial EC  |
| CTACTATG db/db2 | db/db | 490   | 0.025868 | FALSE | 3.301514 | FALSE | Photoreceptor          |
| CTACTATG db/db2 | db/db | 4249  | 0.028754 | FALSE | 0.947156 | FALSE | Photoreceptor          |
| CTACTATG db/db2 | db/db | 2072  | 0.054795 | FALSE | 1.95136  | FALSE | Photoreceptor          |
| CTACTATT db/db2 | db/db | 782   | 0.080645 | FALSE | 9.183674 | TRUE  |                        |
| CTACTATT db/db2 | db/db | 1449  | 0.029787 | FALSE | 1.220632 | FALSE | Photoreceptor          |
| CTACTATT db/db2 | db/db | 1495  | 0.030318 | FALSE | 1.012825 | FALSE | Photoreceptor          |
| CTAGACAA db/db2 | db/db | 9693  | 0.03313  | FALSE | 0.592399 | FALSE | Photoreceptor          |
| CTAGACAA db/db2 | db/db | 4398  | 0.046906 | FALSE | 1.120022 | FALSE | Photoreceptor          |
| CTAGACAC db/db2 | db/db | 773   | 0.038953 | FALSE | 1.107129 | FALSE | Photoreceptor          |
| CTAGACAC db/db2 | db/db | 2359  | 0.012303 | FALSE | 1.189049 | FALSE | Endothelia Capillary E |
| CTAGACAT db/db2 | db/db | 6417  | 0.026328 | FALSE | 0.625976 | FALSE | Photoreceptor          |
| CTAGGTAA db/db2 | db/db | 3642  | 0.131994 | TRUE  | 4.489119 | FALSE |                        |
| CTAGGTAC db/db2 | db/db | 1728  | 0.015879 | FALSE | 1.273283 | FALSE | Endothelia Capillary E |
| CTAGGTAC db/db2 | db/db | 1249  | 0.068864 | FALSE | 1.990442 | FALSE | Photoreceptor          |
| CTAGGTAT db/db2 | db/db | 1965  | 0.018761 | FALSE | 1.194313 | FALSE | Endothelia EC-C4       |
| CTATAGGA db/db2 | db/db | 1288  | 0.060641 | FALSE | 10.57155 | TRUE  |                        |
| CTATAGGA db/db2 | db/db | 1397  | 0.052669 | FALSE | 2.045055 | FALSE | Photoreceptor          |
| CTATCCGA db/db2 | db/db | 270   | 0.043505 | FALSE | 55.68783 | TRUE  |                        |

|                 |       |       |          |       |          |       |                        |
|-----------------|-------|-------|----------|-------|----------|-------|------------------------|
| CTATCCGC db/db2 | db/db | 1313  | 0.095727 | FALSE | 1.510939 | FALSE | Photoreceptor          |
| CTATCTAC db/db2 | db/db | 737   | 0.024105 | FALSE | 0.374672 | FALSE | Photoreceptor          |
| CTATCTAG db/db2 | db/db | 2684  | 0.021669 | FALSE | 0.328617 | FALSE | Photoreceptor          |
| CTATCTAT db/db2 | db/db | 848   | 0.012303 | FALSE | 0.888416 | FALSE | Endothelia Capillary E |
| CTCAACCC db/db2 | db/db | 2933  | 0.004436 | FALSE | 1.207804 | FALSE | Neuron                 |
| CTCAACCC db/db2 | db/db | 3934  | 0.034954 | FALSE | 1.04338  | FALSE | Photoreceptor          |
| CTCAACCC db/db2 | db/db | 1594  | 0.022059 | FALSE | 2.082468 | FALSE | Endothelia Capillary E |
| CTCAACCC db/db2 | db/db | 4839  | 0.019455 | FALSE | 1.06627  | FALSE | Endothelia Venous EC   |
| CTCAACCC db/db2 | db/db | 1205  | 0.047807 | FALSE | 1.880114 | FALSE | Photoreceptor          |
| CTCAACCT db/db2 | db/db | 3748  | 0.018422 | FALSE | 0.453217 | FALSE | Photoreceptor          |
| CTCAAGA db/db2  | db/db | 832   | 0.031973 | FALSE | 4.370782 | FALSE | Muller cell            |
| CTCAAGAC db/db2 | db/db | 1334  | 0.018761 | FALSE | 0.852817 | FALSE | Muller cell            |
| CTCAAGAC db/db2 | db/db | 5070  | 0.030318 | FALSE | 0.767295 | FALSE | Photoreceptor          |
| CTCAAGAC db/db2 | db/db | 400   | 0.024971 | FALSE | 1.662058 | FALSE | Microglia              |
| CTCAATTA db/db2 | db/db | 6660  | 0.032546 | FALSE | 0.990893 | FALSE | Photoreceptor          |
| CTCAATTC db/db2 | db/db | 8618  | 0.024971 | FALSE | 0.364323 | FALSE | Photoreceptor          |
| CTCAATTC db/db2 | db/db | 4194  | 0.088776 | FALSE | 1.221421 | FALSE | Endothelia Venous EC   |
| CTCACTGA db/db2 | db/db | 1232  | 0.064568 | FALSE | 1.791334 | FALSE | Photoreceptor          |
| CTCACTGC db/db2 | db/db | 361   | 0.022857 | FALSE | 4.759635 | FALSE | Muller cell            |
| CTCACTGT db/db2 | db/db | 520   | 0.014151 | FALSE | 2.630264 | FALSE | Photoreceptor          |
| CTCAGAA db/db2  | db/db | 1460  | 0.031411 | FALSE | 1.095875 | FALSE | Photoreceptor          |
| CTCAGAAC db/db2 | db/db | 2586  | 0.049679 | FALSE | 1.741164 | FALSE | Endothelia EC-C4       |
| CTCAGAAC db/db2 | db/db | 2142  | 0.068864 | FALSE | 1.081323 | FALSE | Photoreceptor          |
| CTCAGAAT db/db2 | db/db | 10042 | 0.010846 | FALSE | 0.545332 | FALSE | Photoreceptor          |
| CTCAGAAT db/db2 | db/db | 676   | 0.033726 | FALSE | 4.212946 | FALSE | Muller cell            |
| CTCAGGG db/db2  | db/db | 695   | 0.020171 | FALSE | 0.656577 | FALSE | Photoreceptor          |
| CTCAGGG db/db2  | db/db | 1818  | 0.020536 | FALSE | 0.956394 | FALSE | Photoreceptor          |
| CTCAGGG db/db2  | db/db | 4024  | 0.021286 | FALSE | 1.092289 | FALSE | Endothelia EC-C4       |
| CTCAGGG db/db2  | db/db | 1230  | 0.061912 | FALSE | 1.462228 | FALSE | Photoreceptor          |
| CTCAGGG db/db2  | db/db | 5470  | 0.019455 | FALSE | 1.045566 | FALSE | Endothelia Venous EC   |
| CTCAGGG db/db2  | db/db | 9107  | 0.036232 | FALSE | 0.775782 | FALSE | Photoreceptor          |
| CTCAGTCC db/db2 | db/db | 399   | 0.037564 | FALSE | 26.94064 | TRUE  |                        |
| CTCAGTCC db/db2 | db/db | 8569  | 0.016488 | FALSE | 0.641418 | FALSE | Photoreceptor          |
| CTCAGTCC db/db2 | db/db | 1604  | 0.082569 | FALSE | 20.06648 | TRUE  |                        |
| CTCAGTCT db/db2 | db/db | 5932  | 0.029266 | FALSE | 1.029192 | FALSE | Photoreceptor          |
| CTCATCGA db/db2 | db/db | 881   | 0.046025 | FALSE | 1.103438 | FALSE | Photoreceptor          |
| CTCATCGC db/db2 | db/db | 6562  | 0.084562 | FALSE | 1.004045 | FALSE | Photoreceptor          |
| CTCATCGT db/db2 | db/db | 6756  | 0.023266 | FALSE | 0.981267 | FALSE | Photoreceptor          |
| CTCATGCA db/db2 | db/db | 5918  | 0.028251 | FALSE | 0.891621 | FALSE | Endothelia Venous EC   |
| CTCATGCA db/db2 | db/db | 260   | 0.035586 | FALSE | 49.18567 | TRUE  |                        |
| CTCATGCA db/db2 | db/db | 4020  | 0.148319 | TRUE  | 4.138072 | FALSE |                        |
| CTCATTAA db/db2 | db/db | 547   | 0.024105 | FALSE | 1.025487 | FALSE | Photoreceptor          |
| CTCATTAC db/db2 | db/db | 719   | 0.016488 | FALSE | 2.183866 | FALSE | Endothelia Capillary E |
| CTCATTAC db/db2 | db/db | 566   | 0.028251 | FALSE | 3.432842 | FALSE | Muller cell            |
| CTCATTAT db/db2 | db/db | 2129  | 0.017114 | FALSE | 1.28829  | FALSE | Endothelia Capillary E |
| CTCCAACA db/db2 | db/db | 8689  | 0.023266 | FALSE | 0.679137 | FALSE | Photoreceptor          |
| CTCCAACA db/db2 | db/db | 1952  | 0.019106 | FALSE | 0.806682 | FALSE | Endothelia EC-C4       |



|                 |       |      |          |       |          |       |                        |
|-----------------|-------|------|----------|-------|----------|-------|------------------------|
| CTCCAACC db/db2 | db/db | 4707 | 0.031411 | FALSE | 0.853855 | FALSE | Photoreceptor          |
| CTCCAACC db/db2 | db/db | 6371 | 0.020171 | FALSE | 0.776732 | FALSE | Endothelia Venous EC   |
| CTCCAACG db/db2 | db/db | 3220 | 0.17103  | TRUE  | 5.164034 | TRUE  |                        |
| CTCCAACG db/db2 | db/db | 8705 | 0.017114 | FALSE | 0.795153 | FALSE | Photoreceptor          |
| CTCCAACG db/db2 | db/db | 2797 | 0.015879 | FALSE | 1.322477 | FALSE | Endothelia Aterial EC  |
| CTCCAACT db/db2 | db/db | 427  | 0.057037 | FALSE | 3.425405 | FALSE | Muller cell            |
| CTCCAACT db/db2 | db/db | 2005 | 0.013605 | FALSE | 1.2794   | FALSE | Endothelia Aterial EC  |
| CTCCAACT db/db2 | db/db | 1484 | 0.082569 | FALSE | 2.442445 | FALSE | Photoreceptor          |
| CTCCACAA db/db2 | db/db | 1162 | 0.059406 | FALSE | 1.791186 | FALSE | Photoreceptor          |
| CTCCACAG db/db2 | db/db | 1971 | 0.046906 | FALSE | 1.011541 | FALSE | Photoreceptor          |
| CTCCATGT db/db2 | db/db | 5363 | 0.027273 | FALSE | 0.856926 | FALSE | Endothelia Venous EC   |
| CTCCCAAA db/db2 | db/db | 3223 | 0.030859 | FALSE | 1.033285 | FALSE | Photoreceptor          |
| CTCCCAAC db/db2 | db/db | 2549 | 0.029266 | FALSE | 1.029643 | FALSE | Endothelia EC-C4       |
| CTCCCAAG db/db2 | db/db | 388  | 0.029787 | FALSE | 26.43312 | TRUE  |                        |
| CTCCCAAG db/db2 | db/db | 597  | 0.034334 | FALSE | 1.50077  | FALSE | Photoreceptor          |
| CTCCCAAT db/db2 | db/db | 2115 | 0.028251 | FALSE | 1.171299 | FALSE | Photoreceptor          |
| CTCCCAAT db/db2 | db/db | 1849 | 0.024534 | FALSE | 0.777138 | FALSE | Photoreceptor          |
| CTCCCTCA db/db2 | db/db | 479  | 0.130374 | TRUE  | 7.58427  | TRUE  |                        |
| CTCCCTCG db/db2 | db/db | 9713 | 0.015581 | FALSE | 0.605564 | FALSE | Photoreceptor          |
| CTCCCTCG db/db2 | db/db | 569  | 0.059406 | FALSE | 2.606084 | FALSE | Endothelia Capillary E |
| CTCCCTCT db/db2 | db/db | 4297 | 0.012814 | FALSE | 1.169216 | FALSE | Photoreceptor          |
| CTCCCTCT db/db2 | db/db | 6347 | 0.049679 | FALSE | 0.824798 | FALSE | Endothelia Venous EC   |
| CTCCCTCT db/db2 | db/db | 989  | 0.060641 | FALSE | 1.930961 | FALSE | Neuron                 |
| CTCCGATG db/db2 | db/db | 8646 | 0.014711 | FALSE | 0.666384 | FALSE | Photoreceptor          |
| CTCCTCCC db/db2 | db/db | 557  | 0.067388 | FALSE | 3.414756 | FALSE | Endothelia Capillary E |
| CTCCTCCG db/db2 | db/db | 381  | 0.049679 | FALSE | 3.985552 | FALSE | Muller cell            |
| CTCCTCCG db/db2 | db/db | 388  | 0.048732 | FALSE | 3.83177  | FALSE | Photoreceptor          |
| CTCCTCCT db/db2 | db/db | 1894 | 0.01981  | FALSE | 1.681046 | FALSE | Neuron                 |
| CTCCTTTA db/db2 | db/db | 230  | 0.027273 | FALSE | 57.8125  | TRUE  |                        |
| CTCCTTTG db/db2 | db/db | 2698 | 0.020171 | FALSE | 0.443229 | FALSE | Photoreceptor          |
| CTCCTTTT db/db2 | db/db | 1114 | 0.046906 | FALSE | 0.783733 | FALSE | Photoreceptor          |
| CTCGAGG db/db2  | db/db | 418  | 0.047807 | FALSE | 5.663717 | TRUE  |                        |
| CTCGAGG db/db2  | db/db | 2635 | 0.040404 | FALSE | 1.410654 | FALSE | Photoreceptor          |
| CTCTCAGA db/db2 | db/db | 1691 | 0.021286 | FALSE | 1.706309 | FALSE | Endothelia Capillary E |
| CTCTCAGC db/db2 | db/db | 1323 | 0.068864 | FALSE | 1.637084 | FALSE | Photoreceptor          |
| CTCTCAGC db/db2 | db/db | 2411 | 0.020536 | FALSE | 1.392097 | FALSE | Endothelia Capillary E |
| CTCTCAGC db/db2 | db/db | 2340 | 0.065957 | FALSE | 1.04068  | FALSE | Endothelia Capillary E |
| CTCTCAGC db/db2 | db/db | 4359 | 0.028754 | FALSE | 1.132689 | FALSE | Endothelia Venous EC   |
| CTCTCAGT db/db2 | db/db | 716  | 0.061912 | FALSE | 11.15141 | TRUE  |                        |
| CTCTCAGT db/db2 | db/db | 1540 | 0.019455 | FALSE | 0.811863 | FALSE | Photoreceptor          |
| CTCTCGAC db/db2 | db/db | 420  | 0.022455 | FALSE | 53.91304 | TRUE  |                        |
| CTCTCGAC db/db2 | db/db | 811  | 0.048732 | FALSE | 0.86746  | FALSE | Photoreceptor          |
| CTCTCGAC db/db2 | db/db | 1256 | 0.052669 | FALSE | 1.640369 | FALSE | Photoreceptor          |
| CTCTCGAC db/db2 | db/db | 2014 | 0.031411 | FALSE | 0.78863  | FALSE | Photoreceptor          |
| CTCTCGAC db/db2 | db/db | 9359 | 0.029787 | FALSE | 0.69607  | FALSE | Photoreceptor          |
| CTCTGGTA db/db2 | db/db | 1750 | 0.021669 | FALSE | 1.20204  | FALSE | Endothelia Capillary E |
| CTCTGGTC db/db2 | db/db | 1822 | 0.023682 | FALSE | 0.962429 | FALSE | Photoreceptor          |

|                 |       |      |          |       |          |       |                        |
|-----------------|-------|------|----------|-------|----------|-------|------------------------|
| CTCTGGTC db/db2 | db/db | 219  | 0.038251 | FALSE | 70.84786 | TRUE  |                        |
| CTGAATGC db/db2 | db/db | 2146 | 0.053718 | FALSE | 1.060863 | FALSE | Photoreceptor          |
| CTGAATGC db/db2 | db/db | 5938 | 0.020908 | FALSE | 0.771869 | FALSE | Endothelia Venous EC   |
| CTGAATGC db/db2 | db/db | 611  | 0.017758 | FALSE | 1.251317 | FALSE | Muller cell            |
| CTGAATGT db/db2 | db/db | 1930 | 0.028754 | FALSE | 1.309225 | FALSE | Pericyte               |
| CTGAATGT db/db2 | db/db | 934  | 0.030859 | FALSE | 1.730847 | FALSE | Endothelia Capillary E |
| CTGAGCG db/db2  | db/db | 2445 | 0.088776 | FALSE | 9.45146  | TRUE  |                        |
| CTGAGCG db/db2  | db/db | 2025 | 0.103732 | TRUE  | 2.704952 | FALSE |                        |
| CTGAGCG db/db2  | db/db | 3547 | 0.052669 | FALSE | 0.953146 | FALSE | Photoreceptor          |
| CTGAGGC db/db2  | db/db | 624  | 0.016799 | FALSE | 2.701578 | FALSE | Endothelia Capillary E |
| CTGAGGC db/db2  | db/db | 2814 | 0.028754 | FALSE | 1.047531 | FALSE | Pericyte               |
| CTGAGGC db/db2  | db/db | 1151 | 0.036232 | FALSE | 1.17603  | FALSE | Muller cell            |
| CTGAGGC db/db2  | db/db | 475  | 0.04192  | FALSE | 2.009548 | FALSE | Photoreceptor          |
| CTGAGGC db/db2  | db/db | 3497 | 0.015879 | FALSE | 1.024659 | FALSE | Photoreceptor          |
| CTGATCCC db/db2 | db/db | 467  | 0.073582 | FALSE | 3.824172 | FALSE | Muller cell            |
| CTGATCCC db/db2 | db/db | 764  | 0.013338 | FALSE | 0.239393 | FALSE | Photoreceptor          |
| CTGCAGG db/db2  | db/db | 2695 | 0.029787 | FALSE | 1.458315 | FALSE | Endothelia Capillary E |
| CTGCAGG db/db2  | db/db | 6761 | 0.052669 | FALSE | 0.839491 | FALSE | Endothelia Venous EC   |
| CTGCAGG db/db2  | db/db | 3464 | 0.071958 | FALSE | 1.501078 | FALSE | Endothelia Capillary E |
| CTGCAGG db/db2  | db/db | 1701 | 0.033726 | FALSE | 2.206023 | FALSE | Muller cell            |
| CTGCAGG db/db2  | db/db | 2303 | 0.020536 | FALSE | 0.783357 | FALSE | Photoreceptor          |
| CTGCATCA db/db2 | db/db | 2620 | 0.057037 | FALSE | 1.845624 | FALSE | Photoreceptor          |
| CTGCATCC db/db2 | db/db | 7353 | 0.048732 | FALSE | 0.974007 | FALSE | Photoreceptor          |
| CTGCATCT db/db2 | db/db | 4171 | 0.036891 | FALSE | 1.023791 | FALSE | Endothelia Venous EC   |
| CTGCCATA db/db2 | db/db | 1235 | 0.059406 | FALSE | 2.479743 | FALSE | Endothelia Capillary E |
| CTGCCATA db/db2 | db/db | 2718 | 0.024105 | FALSE | 1.02524  | FALSE | Endothelia Capillary E |
| CTGCCATG db/db2 | db/db | 840  | 0.027758 | FALSE | 39.97456 | TRUE  |                        |
| CTGCCATG db/db2 | db/db | 3824 | 0.038953 | FALSE | 0.636049 | FALSE | Photoreceptor          |
| CTGCCATT db/db2 | db/db | 956  | 0.032546 | FALSE | 0.374518 | FALSE | Photoreceptor          |
| CTGCCATT db/db2 | db/db | 423  | 0.061912 | FALSE | 55.2     | TRUE  |                        |
| CTGCCATT db/db2 | db/db | 711  | 0.095727 | FALSE | 4.339586 | FALSE | Muller cell            |
| CTGCCATT db/db2 | db/db | 1405 | 0.031411 | FALSE | 0.571437 | FALSE | Photoreceptor          |
| CTGCCTAT db/db2 | db/db | 4604 | 0.130374 | TRUE  | 2.22996  | FALSE |                        |
| CTGCGAG db/db2  | db/db | 8743 | 0.036232 | FALSE | 0.67527  | FALSE | Photoreceptor          |
| CTGCGAG db/db2  | db/db | 492  | 0.032546 | FALSE | 1.177722 | FALSE | Photoreceptor          |
| CTGCGAG db/db2  | db/db | 2204 | 0.084562 | FALSE | 1.815785 | FALSE | Muller cell            |
| CTGCGAG db/db2  | db/db | 539  | 0.030318 | FALSE | 42.16084 | TRUE  |                        |
| CTGCGAG db/db2  | db/db | 1209 | 0.033726 | FALSE | 1.148715 | FALSE | Photoreceptor          |
| CTGCGAG db/db2  | db/db | 7612 | 0.029787 | FALSE | 0.809216 | FALSE | Photoreceptor          |
| CTGCGAG db/db2  | db/db | 7043 | 0.143501 | TRUE  | 2.136546 | FALSE |                        |
| CTGCTCAC db/db2 | db/db | 584  | 0.031973 | FALSE | 2.269361 | FALSE | Endothelia Capillary E |
| CTGCTCAT db/db2 | db/db | 2346 | 0.010384 | FALSE | 0.670689 | FALSE | Endothelia EC-C4       |
| CTGCTCAT db/db2 | db/db | 3665 | 0.022857 | FALSE | 1.169467 | FALSE | Endothelia Capillary E |
| CTGGACG db/db2  | db/db | 4583 | 0.011081 | FALSE | 1.019303 | FALSE | Neuron                 |
| CTGGACG db/db2  | db/db | 726  | 0.03313  | FALSE | 3.99093  | FALSE | Muller cell            |
| CTGGACG db/db2  | db/db | 1211 | 0.020908 | FALSE | 1.150477 | FALSE | Endothelia EC-C4       |
| CTGGACG db/db2  | db/db | 1319 | 0.014429 | FALSE | 2.215585 | FALSE | Endothelia Capillary E |

|                  |       |      |          |       |          |       |                        |
|------------------|-------|------|----------|-------|----------|-------|------------------------|
| CTGGCAG/ db/db2  | db/db | 394  | 0.055901 | FALSE | 0.474086 | FALSE | Pericyte               |
| CTGGCAG( db/db2  | db/db | 3979 | 0.012303 | FALSE | 0.841875 | FALSE | Endothelia EC-C4       |
| CTGGTCTA db/db2  | db/db | 1905 | 0.093319 | FALSE | 1.103175 | FALSE | Photoreceptor          |
| CTGGTCTC db/db2  | db/db | 5458 | 0.022455 | FALSE | 1.011055 | FALSE | Endothelia Venous EC   |
| CTGGTCTT db/db2  | db/db | 3128 | 0.018422 | FALSE | 1.303134 | FALSE | Endothelia Capillary E |
| CTGTACCA db/db2  | db/db | 3279 | 0.01981  | FALSE | 1.339416 | FALSE | Endothelia Capillary E |
| CTGTACCC db/db2  | db/db | 2474 | 0.064568 | FALSE | 1.382348 | FALSE | Photoreceptor          |
| CTGTACCC db/db2  | db/db | 4120 | 0.029266 | FALSE | 1.173486 | FALSE | Photoreceptor          |
| CTGTACCC db/db2  | db/db | 1734 | 0.047807 | FALSE | 1.685231 | FALSE | Endothelia Capillary E |
| CTGTAGA/ db/db2  | db/db | 1374 | 0.014997 | FALSE | 1.967062 | FALSE | Microglia              |
| CTGTAGAC( db/db2 | db/db | 2749 | 0.021286 | FALSE | 0.910733 | FALSE | Endothelia EC-C4       |
| CTGTAGAC( db/db2 | db/db | 2239 | 0.030318 | FALSE | 1.407995 | FALSE | Pericyte               |
| CTGTAGAT db/db2  | db/db | 1646 | 0.015287 | FALSE | 0.500843 | FALSE | Endothelia Capillary E |
| CTGTATTA db/db2  | db/db | 459  | 0.014711 | FALSE | 0.823173 | FALSE | Photoreceptor          |
| CTGTATTA db/db2  | db/db | 4347 | 0.040404 | FALSE | 1.090143 | FALSE | Photoreceptor          |
| CTGTATTA db/db2  | db/db | 786  | 0.017434 | FALSE | 2.420295 | FALSE | Photoreceptor          |
| CTGTATTA db/db2  | db/db | 5508 | 0.033726 | FALSE | 0.967797 | FALSE | Photoreceptor          |
| CTGTATTT db/db2  | db/db | 4757 | 0.04192  | FALSE | 0.822725 | FALSE | Photoreceptor          |
| CTGTCGTA db/db2  | db/db | 2729 | 0.038251 | FALSE | 1.616137 | FALSE | Neuron                 |
| CTGTCGTA db/db2  | db/db | 3518 | 0.029266 | FALSE | 1.187646 | FALSE | Photoreceptor          |
| CTGTCGTA db/db2  | db/db | 3274 | 0.017434 | FALSE | 0.928051 | FALSE | Endothelia Capillary E |
| CTGTCGT( db/db2  | db/db | 3286 | 0.045165 | FALSE | 1.440689 | FALSE | Endothelia Capillary E |
| CTGTCGTT db/db2  | db/db | 4363 | 0.025416 | FALSE | 0.92404  | FALSE | Endothelia EC-C4       |
| CTGTCGTT db/db2  | db/db | 9370 | 0.012814 | FALSE | 0.680532 | FALSE | Photoreceptor          |
| CTGTGAAC( db/db2 | db/db | 6431 | 0.15354  | TRUE  | 3.076854 | FALSE |                        |
| CTGTGAAC( db/db2 | db/db | 821  | 0.038251 | FALSE | 1.987942 | FALSE | Endothelia Capillary E |
| CTGTGGG/ db/db2  | db/db | 868  | 0.022857 | FALSE | 2.480059 | FALSE | Endothelia Capillary E |
| CTGTGGG( db/db2  | db/db | 1813 | 0.106408 | TRUE  | 8.734506 | TRUE  |                        |
| CTGTGGG( db/db2  | db/db | 1332 | 0.100165 | TRUE  | 1.976936 | FALSE |                        |
| CTGTGGG db/db2   | db/db | 270  | 0.058205 | FALSE | 2.105731 | FALSE | Microglia              |
| CTTACCGA db/db2  | db/db | 4626 | 0.018422 | FALSE | 0.92222  | FALSE | Endothelia EC-C4       |
| CTTACCGC db/db2  | db/db | 544  | 0.064568 | FALSE | 39.06391 | TRUE  |                        |
| CTTACCGC db/db2  | db/db | 2634 | 0.033726 | FALSE | 2.630839 | FALSE | Muller cell            |
| CTTACCGT db/db2  | db/db | 4235 | 0.022059 | FALSE | 0.980761 | FALSE | Endothelia Capillary E |
| CTTACCGT db/db2  | db/db | 2786 | 0.010157 | FALSE | 1.05803  | FALSE | Endothelia Capillary E |
| CTTACCGT db/db2  | db/db | 1085 | 0.029787 | FALSE | 1.264296 | FALSE | Photoreceptor          |
| CTTAGGA/ db/db2  | db/db | 7092 | 0.036232 | FALSE | 0.907663 | FALSE | Photoreceptor          |
| CTTAGGA/ db/db2  | db/db | 587  | 0.021669 | FALSE | 2.539305 | FALSE | Muller cell            |
| CTTAGGAC( db/db2 | db/db | 2755 | 0.055901 | FALSE | 16.51335 | TRUE  |                        |
| CTTAGGAT db/db2  | db/db | 7040 | 0.018761 | FALSE | 0.705702 | FALSE | Photoreceptor          |
| CTTAGGAT db/db2  | db/db | 1666 | 0.017758 | FALSE | 1.898816 | FALSE | Endothelia Capillary E |
| CTTCAATA db/db2  | db/db | 6595 | 0.010614 | FALSE | 0.942918 | FALSE | Endothelia Venous EC   |
| CTTCAATA db/db2  | db/db | 4348 | 0.021286 | FALSE | 1.04511  | FALSE | Endothelia Venous EC   |
| CTTCCGAA db/db2  | db/db | 1919 | 0.026796 | FALSE | 0.567767 | FALSE | Photoreceptor          |
| CTTCCGAC db/db2  | db/db | 7917 | 0.015287 | FALSE | 0.647162 | FALSE | Photoreceptor          |
| CTTCCGAC db/db2  | db/db | 335  | 0.019106 | FALSE | 59.00086 | TRUE  |                        |
| CTTCCGAC db/db2  | db/db | 2157 | 0.048732 | FALSE | 1.664281 | FALSE | Photoreceptor          |

|                 |       |      |          |       |          |       |                        |
|-----------------|-------|------|----------|-------|----------|-------|------------------------|
| CTTCCGAG db/db2 | db/db | 868  | 0.017434 | FALSE | 1.637352 | FALSE | Endothelia EC-C4       |
| CTTCCGAT db/db2 | db/db | 1912 | 0.01981  | FALSE | 1.526677 | FALSE | Endothelia Capillary E |
| CTTCCGAT db/db2 | db/db | 381  | 0.015581 | FALSE | 1.606818 | FALSE | Endothelia Capillary E |
| CTTCCTTA db/db2 | db/db | 377  | 0.033726 | FALSE | 4.57055  | FALSE | Endothelia Capillary E |
| CTTCCTTA db/db2 | db/db | 3997 | 0.010157 | FALSE | 1.317896 | FALSE | Photoreceptor          |
| CTTCCTTA db/db2 | db/db | 2041 | 0.013338 | FALSE | 1.240617 | FALSE | Endothelia Capillary E |
| CTTCCTTA db/db2 | db/db | 5616 | 0.047807 | FALSE | 1.090838 | FALSE | Photoreceptor          |
| CTTCCTTG db/db2 | db/db | 4665 | 0.15354  | TRUE  | 4.215608 | FALSE |                        |
| CTTCCTTG db/db2 | db/db | 1685 | 0.008234 | FALSE | 0.981353 | FALSE | Endothelia EC-C4       |
| CTTCGGTA db/db2 | db/db | 2329 | 0.093319 | FALSE | 1.105881 | FALSE | Photoreceptor          |
| CTTCGGTA db/db2 | db/db | 7404 | 0.013876 | FALSE | 0.7898   | FALSE | Photoreceptor          |
| CTTCGGTG db/db2 | db/db | 4742 | 0.148319 | TRUE  | 1.948267 | FALSE |                        |
| CTTCTAAC db/db2 | db/db | 1567 | 0.028251 | FALSE | 0.661779 | FALSE | Photoreceptor          |
| CTTCTAAG db/db2 | db/db | 3636 | 0.023266 | FALSE | 1.631669 | FALSE | Neuron                 |
| CTTCTCTA db/db2 | db/db | 5097 | 0.028754 | FALSE | 1.127267 | FALSE | Photoreceptor          |
| CTTCTCTC db/db2 | db/db | 967  | 0.028251 | FALSE | 0.488182 | FALSE | Photoreceptor          |
| CTTCTCTG db/db2 | db/db | 2074 | 0.025868 | FALSE | 1.288497 | FALSE | Endothelia Capillary E |
| CTTCTCTT db/db2 | db/db | 2325 | 0.068864 | FALSE | 1.603708 | FALSE | Photoreceptor          |
| CTTCTCTT db/db2 | db/db | 7357 | 0.021286 | FALSE | 0.84735  | FALSE | Photoreceptor          |
| CTTCTCTT db/db2 | db/db | 5710 | 0.040404 | FALSE | 0.955927 | FALSE | Endothelia Venous EC   |
| CTTGAGA db/db2  | db/db | 2408 | 0.031411 | FALSE | 0.87579  | FALSE | Photoreceptor          |
| CTTGATTC db/db2 | db/db | 3093 | 0.080645 | FALSE | 1.579729 | FALSE | Photoreceptor          |
| CTTGATTG db/db2 | db/db | 2537 | 0.107669 | TRUE  | 1.718363 | FALSE |                        |
| CTTGATTT db/db2 | db/db | 5210 | 0.018761 | FALSE | 0.795051 | FALSE | Photoreceptor          |
| CTTGATTT db/db2 | db/db | 2267 | 0.017114 | FALSE | 0.983494 | FALSE | Photoreceptor          |
| CTTGATTT db/db2 | db/db | 1128 | 0.007441 | FALSE | 1.873985 | FALSE | Endothelia Capillary E |
| CTTGATTT db/db2 | db/db | 1341 | 0.076994 | FALSE | 15.93776 | TRUE  |                        |
| CTTGATTT db/db2 | db/db | 1143 | 0.058205 | FALSE | 1.544479 | FALSE | Photoreceptor          |
| CTTCAATT db/db2 | db/db | 1028 | 0.041154 | FALSE | 1.09165  | FALSE | Photoreceptor          |
| CTTTCGGA db/db2 | db/db | 1159 | 0.017434 | FALSE | 1.616021 | FALSE | Endothelia Capillary E |
| CTTTCGGC db/db2 | db/db | 1035 | 0.039671 | FALSE | 1.636803 | FALSE | Muller cell            |
| CTTTCGGT db/db2 | db/db | 7145 | 0.026796 | FALSE | 1.024678 | FALSE | Photoreceptor          |
| GAAACCT db/db2  | db/db | 1046 | 0.044326 | FALSE | 1.8403   | FALSE | Photoreceptor          |
| GAAACCT db/db2  | db/db | 4236 | 0.018761 | FALSE | 0.982094 | FALSE | Endothelia Venous EC   |
| GAAACCT db/db2  | db/db | 4792 | 0.070386 | FALSE | 0.99131  | FALSE | Photoreceptor          |
| GAAATGA db/db2  | db/db | 1288 | 0.059406 | FALSE | 2.015551 | FALSE | Photoreceptor          |
| GAAATGA db/db2  | db/db | 1919 | 0.039671 | FALSE | 6.236018 | TRUE  |                        |
| GAAATGA db/db2  | db/db | 439  | 0.143501 | TRUE  | 39.6184  | TRUE  |                        |
| GAAATGA db/db2  | db/db | 1182 | 0.053718 | FALSE | 1.245868 | FALSE | Photoreceptor          |
| GAAATGA db/db2  | db/db | 771  | 0.068864 | FALSE | 3.72959  | FALSE | Muller cell            |
| GAAATGA db/db2  | db/db | 4496 | 0.042704 | FALSE | 1.026591 | FALSE | Endothelia Capillary E |
| GAACACT db/db2  | db/db | 2551 | 0.095727 | FALSE | 1.534318 | FALSE | Photoreceptor          |
| GAACACT db/db2  | db/db | 5996 | 0.014151 | FALSE | 0.707592 | FALSE | Photoreceptor          |
| GAACGTT db/db2  | db/db | 4929 | 0.021669 | FALSE | 0.949929 | FALSE | Endothelia EC-C4       |
| GAACGTT db/db2  | db/db | 1529 | 0.024105 | FALSE | 1.463262 | FALSE | Endothelia Capillary E |
| GAACGTT db/db2  | db/db | 5200 | 0.016488 | FALSE | 1.010049 | FALSE | Photoreceptor          |
| GAACGTT db/db2  | db/db | 583  | 0.010157 | FALSE | 1.86712  | FALSE | Pericyte               |

|                 |       |      |          |       |          |       |                         |
|-----------------|-------|------|----------|-------|----------|-------|-------------------------|
| GAAGTGT db/db2  | db/db | 895  | 0.061912 | FALSE | 1.643405 | FALSE | Photoreceptor           |
| GAAGTGT db/db2  | db/db | 1066 | 0.076994 | FALSE | 7.258549 | TRUE  |                         |
| GAAGAAT db/db2  | db/db | 1472 | 0.075259 | FALSE | 6.514789 | TRUE  |                         |
| GAAGAAT db/db2  | db/db | 532  | 0.05065  | FALSE | 36.96275 | TRUE  |                         |
| GAAGAAT db/db2  | db/db | 391  | 0.054795 | FALSE | 33.5443  | TRUE  |                         |
| GAAGAAT db/db2  | db/db | 1874 | 0.051646 | FALSE | 0.775339 | FALSE | Photoreceptor           |
| GAAGAAT db/db2  | db/db | 7288 | 0.032546 | FALSE | 0.962348 | FALSE | Photoreceptor           |
| GAAGCCC db/db2  | db/db | 2155 | 0.032546 | FALSE | 0.529403 | FALSE | Photoreceptor           |
| GAAGCCC db/db2  | db/db | 1202 | 0.088776 | FALSE | 3.856461 | FALSE | Muller cell             |
| GAAGCCC db/db2  | db/db | 2894 | 0.018088 | FALSE | 0.517652 | FALSE | Photoreceptor           |
| GAAGCCC db/db2  | db/db | 3427 | 0.016799 | FALSE | 1.008699 | FALSE | Endothelia Venous EC    |
| GAAGCGA db/db2  | db/db | 5576 | 0.019455 | FALSE | 0.599489 | FALSE | Photoreceptor           |
| GAAGCGA db/db2  | db/db | 337  | 0.041154 | FALSE | 2.659588 | FALSE | Neuron                  |
| GAAGCGA db/db2  | db/db | 1950 | 0.022455 | FALSE | 1.392321 | FALSE | Pericyte                |
| GAAGCGA db/db2  | db/db | 515  | 0.022059 | FALSE | 54.71779 | TRUE  |                         |
| GAAGCGA db/db2  | db/db | 3029 | 0.03313  | FALSE | 1.293074 | FALSE | Endothelia Capillary EC |
| GAAGGAC db/db2  | db/db | 3393 | 0.060641 | FALSE | 1.521402 | FALSE | Neuron                  |
| GAAGGAC db/db2  | db/db | 2861 | 0.030318 | FALSE | 1.000022 | FALSE | Photoreceptor           |
| GAAGGAC db/db2  | db/db | 5821 | 0.030859 | FALSE | 0.631055 | FALSE | Photoreceptor           |
| GAAGGGT db/db2  | db/db | 4007 | 0.017114 | FALSE | 1.071436 | FALSE | Photoreceptor           |
| GAAGGGT db/db2  | db/db | 460  | 0.082569 | FALSE | 3.812001 | FALSE | Muller cell             |
| GAAGGGT db/db2  | db/db | 5953 | 0.036232 | FALSE | 0.934988 | FALSE | Photoreceptor           |
| GAAGGGT db/db2  | db/db | 1598 | 0.015879 | FALSE | 0.63538  | FALSE | Photoreceptor           |
| GAAGGGT db/db2  | db/db | 1966 | 0.014429 | FALSE | 1.218571 | FALSE | Endothelia Capillary EC |
| GAAGTAA db/db2  | db/db | 810  | 0.033726 | FALSE | 3.682784 | FALSE | Muller cell             |
| GAAGTAA db/db2  | db/db | 3025 | 0.016799 | FALSE | 1.006135 | FALSE | Endothelia Capillary EC |
| GAAGTAA db/db2  | db/db | 736  | 0.014711 | FALSE | 2.683065 | FALSE | Endothelia Capillary EC |
| GAAGTAA db/db2  | db/db | 1668 | 0.014711 | FALSE | 1.825801 | FALSE | Endothelia Capillary EC |
| GAAGTAA db/db2  | db/db | 8039 | 0.022857 | FALSE | 0.58393  | FALSE | Photoreceptor           |
| GAAGTAA db/db2  | db/db | 3719 | 0.059406 | FALSE | 1.441574 | FALSE | Photoreceptor           |
| GAATAGA db/db2  | db/db | 1239 | 0.013605 | FALSE | 0        | FALSE | Photoreceptor           |
| GAATAGA db/db2  | db/db | 4135 | 0.071958 | FALSE | 1.094293 | FALSE | Photoreceptor           |
| GAATAGA db/db2  | db/db | 502  | 0.008644 | FALSE | 0        | FALSE | Photoreceptor           |
| GAATCAC db/db2  | db/db | 515  | 0.007636 | FALSE | 2.398526 | FALSE | Endothelia Capillary EC |
| GAATCAC db/db2  | db/db | 365  | 0.075259 | FALSE | 32.87462 | TRUE  |                         |
| GAATCAC db/db2  | db/db | 5596 | 0.036232 | FALSE | 1.132485 | FALSE | Photoreceptor           |
| GAATCACT db/db2 | db/db | 1035 | 0.024534 | FALSE | 2.189185 | FALSE | Muller cell             |
| GAATCGT db/db2  | db/db | 4251 | 0.296296 | TRUE  | 3.231374 | FALSE |                         |
| GAATCGT db/db2  | db/db | 852  | 0.040404 | FALSE | 0.983481 | FALSE | Photoreceptor           |
| GAATCGT db/db2  | db/db | 366  | 0.027758 | FALSE | 3.311884 | FALSE | Endothelia Capillary EC |
| GAATCGT db/db2  | db/db | 1670 | 0.036891 | FALSE | 1.550066 | FALSE | Photoreceptor           |
| GAATCGT db/db2  | db/db | 860  | 0.039671 | FALSE | 1.147601 | FALSE | Endothelia Capillary EC |
| GACACGC db/db2  | db/db | 691  | 0.138889 | TRUE  | 7.664884 | TRUE  |                         |
| GACACGC db/db2  | db/db | 3985 | 0.029266 | FALSE | 1.0564   | FALSE | Endothelia Capillary EC |
| GACACGC db/db2  | db/db | 1114 | 0.035586 | FALSE | 2.269097 | FALSE | Photoreceptor           |
| GACACGC db/db2  | db/db | 1152 | 0.032546 | FALSE | 1.63397  | FALSE | Photoreceptor           |
| GACACGC db/db2  | db/db | 5548 | 0.024971 | FALSE | 0.977842 | FALSE | Endothelia Venous EC    |

|                 |       |      |          |       |          |       |                        |
|-----------------|-------|------|----------|-------|----------|-------|------------------------|
| GACAGCC/ db/db2 | db/db | 4197 | 0.024105 | FALSE | 0.54011  | FALSE | Photoreceptor          |
| GACAGCC( db/db2 | db/db | 1015 | 0.031411 | FALSE | 0.610259 | FALSE | Photoreceptor          |
| GACAGCC( db/db2 | db/db | 1366 | 0.036232 | FALSE | 2.035741 | FALSE | Photoreceptor          |
| GACAGCC( db/db2 | db/db | 642  | 0.038251 | FALSE | 44.07407 | TRUE  |                        |
| GACAGCC( db/db2 | db/db | 3471 | 0.027758 | FALSE | 1.068797 | FALSE | Endothelia EC-C4       |
| GACATCA/ db/db2 | db/db | 2142 | 0.028251 | FALSE | 0.584281 | FALSE | Photoreceptor          |
| GACATCA/ db/db2 | db/db | 481  | 0.061912 | FALSE | 28.89151 | TRUE  |                        |
| GACATCA( db/db2 | db/db | 5046 | 0.063221 | FALSE | 1.041044 | FALSE | Photoreceptor          |
| GACATCA( db/db2 | db/db | 3499 | 0.009933 | FALSE | 1.466531 | FALSE | Photoreceptor          |
| GACATCA( db/db2 | db/db | 647  | 0.039671 | FALSE | 4.773774 | FALSE | Muller cell            |
| GACATCA( db/db2 | db/db | 3220 | 0.026328 | FALSE | 1.271407 | FALSE | Endothelia Venous EC   |
| GACCAAT/ db/db2 | db/db | 4983 | 0.038251 | FALSE | 1.616084 | FALSE | Photoreceptor          |
| GACCAAT( db/db2 | db/db | 2733 | 0.126437 | TRUE  | 2.375673 | FALSE |                        |
| GACCAAT( db/db2 | db/db | 5438 | 0.038251 | FALSE | 0.893546 | FALSE | Endothelia EC-C4       |
| GACCAATT db/db2 | db/db | 610  | 0.018761 | FALSE | 0.775235 | FALSE | Photoreceptor          |
| GACCAATT db/db2 | db/db | 5462 | 0.017434 | FALSE | 0.84451  | FALSE | Endothelia Venous EC   |
| GACCCAG  db/db2 | db/db | 8376 | 0.015581 | FALSE | 0.951399 | FALSE | Photoreceptor          |
| GACCCTTA db/db2 | db/db | 794  | 0.126437 | TRUE  | 5.805397 | TRUE  |                        |
| GACCCTTA db/db2 | db/db | 1936 | 0.013338 | FALSE | 0.453943 | FALSE | Photoreceptor          |
| GACCCTTA db/db2 | db/db | 4256 | 0.028754 | FALSE | 0.941231 | FALSE | Photoreceptor          |
| GACCCTTG db/db2 | db/db | 1395 | 0.040404 | FALSE | 33.80045 | TRUE  |                        |
| GACCCTTG db/db2 | db/db | 3990 | 0.019455 | FALSE | 0.888035 | FALSE | Endothelia EC-C4       |
| GACCCTTG db/db2 | db/db | 3788 | 0.012052 | FALSE | 0.96911  | FALSE | Endothelia Capillary E |
| GACCCTTT db/db2 | db/db | 5032 | 0.112477 | TRUE  | 1.663769 | FALSE |                        |
| GACCGTG/ db/db2 | db/db | 2395 | 0.314286 | TRUE  | 18.51852 | TRUE  |                        |
| GACCGTG( db/db2 | db/db | 660  | 0.034334 | FALSE | 42.1286  | TRUE  |                        |
| GACCGTG  db/db2 | db/db | 1278 | 0.098234 | FALSE | 1.457981 | FALSE | Photoreceptor          |
| GACCTTCA db/db2 | db/db | 8177 | 0.030318 | FALSE | 0.778599 | FALSE | Photoreceptor          |
| GACCTTCC db/db2 | db/db | 3935 | 0.029266 | FALSE | 0.956511 | FALSE | Endothelia Capillary E |
| GACCTTCC db/db2 | db/db | 1507 | 0.025416 | FALSE | 0.782268 | FALSE | Photoreceptor          |
| GACCTTCC db/db2 | db/db | 928  | 0.053718 | FALSE | 3.23829  | FALSE | Muller cell            |
| GACGCTG/ db/db2 | db/db | 3701 | 0.016488 | FALSE | 1.084102 | FALSE | Endothelia Capillary E |
| GACGCTG/ db/db2 | db/db | 3534 | 0.016181 | FALSE | 0.961848 | FALSE | Photoreceptor          |
| GACGCTG/ db/db2 | db/db | 5579 | 0.024105 | FALSE | 0.937375 | FALSE | Endothelia Venous EC   |
| GACGCTG( db/db2 | db/db | 2317 | 0.019455 | FALSE | 1.293344 | FALSE | Endothelia Capillary E |
| GACGCTG  db/db2 | db/db | 629  | 0.047807 | FALSE | 3.28438  | FALSE | Endothelia Capillary E |
| GACGTTA( db/db2 | db/db | 4151 | 0.040404 | FALSE | 1.045536 | FALSE | Photoreceptor          |
| GACGTTA( db/db2 | db/db | 8701 | 0.027273 | FALSE | 0.502714 | FALSE | Photoreceptor          |
| GACGTTAT db/db2 | db/db | 1168 | 0.041154 | FALSE | 1.829637 | FALSE | Photoreceptor          |
| GACGTTAT db/db2 | db/db | 9350 | 0.014997 | FALSE | 0.823423 | FALSE | Photoreceptor          |
| GACTATG/ db/db2 | db/db | 3805 | 0.091004 | FALSE | 1.092188 | FALSE | Photoreceptor          |
| GACTATG( db/db2 | db/db | 901  | 0.048732 | FALSE | 1.713942 | FALSE | Endothelia Capillary E |
| GACTATG  db/db2 | db/db | 3122 | 0.024534 | FALSE | 0.668705 | FALSE | Endothelia EC-C4       |
| GACTATG  db/db2 | db/db | 1963 | 0.064568 | FALSE | 9.067155 | TRUE  |                        |
| GACTCAA/ db/db2 | db/db | 1396 | 0.063221 | FALSE | 15.1277  | TRUE  |                        |
| GACTCAAC db/db2 | db/db | 3564 | 0.008852 | FALSE | 1.434541 | FALSE | Neuron                 |
| GACTCTCA db/db2 | db/db | 2109 | 0.05065  | FALSE | 1.73603  | FALSE | Photoreceptor          |

|                 |       |      |          |       |          |       |                        |
|-----------------|-------|------|----------|-------|----------|-------|------------------------|
| GACTCTCA db/db2 | db/db | 7371 | 0.036232 | FALSE | 0.55195  | FALSE | Photoreceptor          |
| GACTCTCC db/db2 | db/db | 3428 | 0.068864 | FALSE | 1.126373 | FALSE | Photoreceptor          |
| GACTCTCC db/db2 | db/db | 578  | 0.084562 | FALSE | 2.79554  | FALSE | Muller cell            |
| GACTCTCC db/db2 | db/db | 883  | 0.04192  | FALSE | 40.07156 | TRUE  |                        |
| GACTCTCT db/db2 | db/db | 7714 | 0.084562 | FALSE | 0.858267 | FALSE | Photoreceptor          |
| GACTGAT db/db2  | db/db | 2200 | 0.022059 | FALSE | 1.556598 | FALSE | Endothelia Capillary E |
| GACTGAT db/db2  | db/db | 393  | 0.116912 | TRUE  | 0.938967 | FALSE |                        |
| GACTGATC db/db2 | db/db | 1516 | 0.054795 | FALSE | 1.478092 | FALSE | Photoreceptor          |
| GACTGATC db/db2 | db/db | 4205 | 0.030318 | FALSE | 0.896085 | FALSE | Photoreceptor          |
| GACTTCCC db/db2 | db/db | 1251 | 0.047807 | FALSE | 3.042106 | FALSE | Muller cell            |
| GACTTCCC db/db2 | db/db | 552  | 0.148377 | TRUE  | 4.410256 | FALSE |                        |
| GACTTCCC db/db2 | db/db | 2036 | 0.063221 | FALSE | 1.791248 | FALSE | Neuron                 |
| GACTTCCC db/db2 | db/db | 389  | 0.037564 | FALSE | 3.746052 | FALSE | Endothelia Capillary E |
| GACTTCCC db/db2 | db/db | 2484 | 0.021286 | FALSE | 1.180922 | FALSE | Endothelia Capillary E |
| GAGAAATC db/db2 | db/db | 1540 | 0.045165 | FALSE | 0.590578 | FALSE | Endothelia Capillary E |
| GAGAAATC db/db2 | db/db | 1827 | 0.04192  | FALSE | 0.678543 | FALSE | Photoreceptor          |
| GAGAAATC db/db2 | db/db | 1758 | 0.024534 | FALSE | 1.279296 | FALSE | Endothelia Capillary E |
| GAGAAATC db/db2 | db/db | 1040 | 0.098234 | FALSE | 1.798924 | FALSE | Muller cell            |
| GAGAAATC db/db2 | db/db | 7430 | 0.076994 | FALSE | 1.150507 | FALSE | Neuron                 |
| GAGAAAT db/db2  | db/db | 456  | 0.04192  | FALSE | 30.83141 | TRUE  |                        |
| GAGACCC db/db2  | db/db | 624  | 0.082569 | FALSE | 3.416488 | FALSE | Muller cell            |
| GAGACCC db/db2  | db/db | 2401 | 0.093319 | FALSE | 1.897027 | FALSE | Photoreceptor          |
| GAGACCC db/db2  | db/db | 2472 | 0.011805 | FALSE | 1.119008 | FALSE | Endothelia EC-C4       |
| GAGACCC db/db2  | db/db | 1111 | 0.020171 | FALSE | 0.853619 | FALSE | Photoreceptor          |
| GAGACTTC db/db2 | db/db | 475  | 0.029266 | FALSE | 3.201118 | FALSE | Muller cell            |
| GAGACTTC db/db2 | db/db | 751  | 0.014711 | FALSE | 3.215578 | FALSE | Muller cell            |
| GAGACTTC db/db2 | db/db | 667  | 0.04192  | FALSE | 2.015398 | FALSE | Muller cell            |
| GAGAGGT db/db2  | db/db | 1042 | 0.021286 | FALSE | 2.179041 | FALSE | Muller cell            |
| GAGAGGT db/db2  | db/db | 5768 | 0.164835 | TRUE  | 6.937866 | TRUE  |                        |
| GAGAGGT db/db2  | db/db | 598  | 0.080645 | FALSE | 4.110729 | FALSE | Photoreceptor          |
| GAGAGGT db/db2  | db/db | 3827 | 0.046025 | FALSE | 1.097427 | FALSE | Photoreceptor          |
| GAGAGGT db/db2  | db/db | 8675 | 0.016488 | FALSE | 0.791029 | FALSE | Photoreceptor          |
| GAGAGGT db/db2  | db/db | 4745 | 0.065957 | FALSE | 1.1022   | FALSE | Endothelia Venous EC   |
| GAGAGGT db/db2  | db/db | 7576 | 0.038251 | FALSE | 0.998561 | FALSE | Photoreceptor          |
| GAGATGG db/db2  | db/db | 1886 | 0.053718 | FALSE | 1.662042 | FALSE | Photoreceptor          |
| GAGATGG db/db2  | db/db | 8444 | 0.018422 | FALSE | 0.632478 | FALSE | Photoreceptor          |
| GAGATGG db/db2  | db/db | 1671 | 0.014997 | FALSE | 1.128634 | FALSE | Endothelia Capillary E |
| GAGATGG db/db2  | db/db | 1746 | 0.017434 | FALSE | 1.151907 | FALSE | Endothelia Capillary E |
| GAGCCTG db/db2  | db/db | 4562 | 0.016181 | FALSE | 1.012274 | FALSE | Endothelia Capillary E |
| GAGCCTG db/db2  | db/db | 1982 | 0.014429 | FALSE | 1.229798 | FALSE | Pericyte               |
| GAGCCTG db/db2  | db/db | 1456 | 0.01981  | FALSE | 1.392601 | FALSE | Endothelia Capillary E |
| GAGCTGC db/db2  | db/db | 3716 | 0.018761 | FALSE | 1.139931 | FALSE | Endothelia Venous EC   |
| GAGCTGC db/db2  | db/db | 873  | 0.039671 | FALSE | 1.290355 | FALSE | Photoreceptor          |
| GAGGCAA db/db2  | db/db | 1025 | 0.030318 | FALSE | 1.630907 | FALSE | Photoreceptor          |
| GAGGCAA db/db2  | db/db | 1077 | 0.041154 | FALSE | 0.852657 | FALSE | Photoreceptor          |
| GAGGCAA db/db2  | db/db | 2730 | 0.022857 | FALSE | 1.293956 | FALSE | Endothelia Capillary E |
| GAGGCAA db/db2  | db/db | 366  | 0.030318 | FALSE | 30.19169 | TRUE  |                        |

|                 |       |      |          |       |          |       |                        |
|-----------------|-------|------|----------|-------|----------|-------|------------------------|
| GAGGCAA` db/db2 | db/db | 9630 | 0.054795 | FALSE | 0.693196 | FALSE | Photoreceptor          |
| GAGGCAA` db/db2 | db/db | 8174 | 0.036232 | FALSE | 0.702715 | FALSE | Photoreceptor          |
| GAGGCCT/ db/db2 | db/db | 5784 | 0.013338 | FALSE | 0.955931 | FALSE | Endothelia Venous EC   |
| GAGGCCT( db/db2 | db/db | 2192 | 0.008644 | FALSE | 1.23438  | FALSE | Photoreceptor          |
| GAGGCCT( db/db2 | db/db | 9741 | 0.016799 | FALSE | 0.668932 | FALSE | Photoreceptor          |
| GAGGCCT  db/db2 | db/db | 1404 | 0.030859 | FALSE | 0.838651 | FALSE | Photoreceptor          |
| GAGGGAT  db/db2 | db/db | 2118 | 0.046025 | FALSE | 0.794201 | FALSE | Photoreceptor          |
| GAGGGAT  db/db2 | db/db | 7217 | 0.015287 | FALSE | 0.581079 | FALSE | Photoreceptor          |
| GAGGGAT  db/db2 | db/db | 5003 | 0.024105 | FALSE | 0.820881 | FALSE | Photoreceptor          |
| GAGGGTA  db/db2 | db/db | 508  | 0.039671 | FALSE | 38.17161 | TRUE  |                        |
| GAGGGTA` db/db2 | db/db | 987  | 0.028251 | FALSE | 0.179703 | FALSE | Photoreceptor          |
| GAGGGTA` db/db2 | db/db | 1032 | 0.027758 | FALSE | 0.380331 | FALSE | Photoreceptor          |
| GAGTCAT/ db/db2 | db/db | 367  | 0.093319 | FALSE | 4.092473 | FALSE | Photoreceptor          |
| GAGTCAT( db/db2 | db/db | 1636 | 0.110901 | TRUE  | 3.293011 | FALSE |                        |
| GAGTCAT( db/db2 | db/db | 1885 | 0.012052 | FALSE | 1.422977 | FALSE | Endothelia Capillary E |
| GAGTCAT( db/db2 | db/db | 2174 | 0.035586 | FALSE | 1.484359 | FALSE | Pericyte               |
| GAGTCAT  db/db2 | db/db | 1502 | 0.064568 | FALSE | 1.686911 | FALSE | Endothelia Capillary E |
| GAGTCTA/ db/db2 | db/db | 929  | 0.065957 | FALSE | 22.48021 | TRUE  |                        |
| GAGTCTA/ db/db2 | db/db | 638  | 0.010157 | FALSE | 0.524516 | FALSE | Photoreceptor          |
| GAGTCTA( db/db2 | db/db | 1309 | 0.014151 | FALSE | 2.040984 | FALSE | Pericyte               |
| GAGTCTA( db/db2 | db/db | 5138 | 0.019106 | FALSE | 0.959275 | FALSE | Endothelia Venous EC   |
| GAGTCTA( db/db2 | db/db | 2953 | 0.067388 | FALSE | 2.16321  | FALSE | Neuron                 |
| GAGTGAG  db/db2 | db/db | 6364 | 0.016488 | FALSE | 0.869265 | FALSE | Photoreceptor          |
| GAGTGAG  db/db2 | db/db | 908  | 0.040404 | FALSE | 0.339765 | FALSE | Photoreceptor          |
| GAGTGAG  db/db2 | db/db | 2204 | 0.010384 | FALSE | 1.30915  | FALSE | Endothelia EC-C4       |
| GAGTGAG  db/db2 | db/db | 1032 | 0.126437 | TRUE  | 10.91413 | TRUE  |                        |
| GAGTGAG  db/db2 | db/db | 3198 | 0.044326 | FALSE | 1.051877 | FALSE | Photoreceptor          |
| GAGTGAG` db/db2 | db/db | 4528 | 0.041154 | FALSE | 1.089269 | FALSE | Photoreceptor          |
| GAGTGTT( db/db2 | db/db | 3861 | 0.006683 | FALSE | 1.274989 | FALSE | Photoreceptor          |
| GAGTGTT( db/db2 | db/db | 392  | 0.064568 | FALSE | 3.59155  | FALSE | Muller cell            |
| GAGTTAC/ db/db2 | db/db | 4898 | 0.011319 | FALSE | 1.020434 | FALSE | Endothelia Venous EC   |
| GAGTTAC( db/db2 | db/db | 2078 | 0.036891 | FALSE | 1.508538 | FALSE | Endothelia Capillary E |
| GAGTTAC( db/db2 | db/db | 2503 | 0.08663  | FALSE | 0.811225 | FALSE | Photoreceptor          |
| GAGTTAC( db/db2 | db/db | 3251 | 0.01981  | FALSE | 1.302546 | FALSE | Endothelia Venous EC   |
| GAGTTGT/ db/db2 | db/db | 545  | 0.030318 | FALSE | 39.04321 | TRUE  |                        |
| GAGTTGT  db/db2 | db/db | 8390 | 0.01981  | FALSE | 0.818313 | FALSE | Photoreceptor          |
| GAGTTTG/ db/db2 | db/db | 6167 | 0.138889 | TRUE  | 5.698616 | TRUE  |                        |
| GAGTTTG( db/db2 | db/db | 2172 | 0.055901 | FALSE | 0.885886 | FALSE | Photoreceptor          |
| GAGTTTG( db/db2 | db/db | 5049 | 0.023266 | FALSE | 0.909548 | FALSE | Photoreceptor          |
| GAGTTTG( db/db2 | db/db | 2719 | 0.091004 | FALSE | 1.451611 | FALSE | Endothelia Capillary E |
| GAGTTTG( db/db2 | db/db | 447  | 0.021669 | FALSE | 2.985849 | FALSE | Muller cell            |
| GATAGAA( db/db2 | db/db | 393  | 0.043505 | FALSE | 4.051482 | FALSE | Muller cell            |
| GATAGAA` db/db2 | db/db | 715  | 0.103567 | TRUE  | 22.57319 | TRUE  |                        |
| GATAGAA` db/db2 | db/db | 813  | 0.026328 | FALSE | 0.223308 | FALSE | Photoreceptor          |
| GATAGAA` db/db2 | db/db | 1423 | 0.032546 | FALSE | 0.708425 | FALSE | Photoreceptor          |
| GATAGCT( db/db2 | db/db | 474  | 0.019106 | FALSE | 2.507944 | FALSE | Endothelia Capillary E |
| GATAGCT( db/db2 | db/db | 363  | 0.060641 | FALSE | 4.030545 | FALSE | Pericyte               |



|                 |       |      |          |       |          |       |                        |
|-----------------|-------|------|----------|-------|----------|-------|------------------------|
| GATAGCTC db/db2 | db/db | 2705 | 0.063221 | FALSE | 1.291472 | FALSE | Pericyte               |
| GATAGCTC db/db2 | db/db | 371  | 0.029266 | FALSE | 4.724681 | FALSE | Muller cell            |
| GATCACAC db/db2 | db/db | 4499 | 0.057037 | FALSE | 1.095635 | FALSE | Photoreceptor          |
| GATCACAT db/db2 | db/db | 7223 | 0.016799 | FALSE | 0.520353 | FALSE | Photoreceptor          |
| GATCAGTC db/db2 | db/db | 4403 | 0.055901 | FALSE | 1.404743 | FALSE | Photoreceptor          |
| GATCAGTC db/db2 | db/db | 4622 | 0.030318 | FALSE | 0.965251 | FALSE | Photoreceptor          |
| GATCAGTC db/db2 | db/db | 1388 | 0.059406 | FALSE | 21.546   | TRUE  |                        |
| GATCAGTC db/db2 | db/db | 1475 | 0.070386 | FALSE | 1.559605 | FALSE | Pericyte               |
| GATCAGTC db/db2 | db/db | 1596 | 0.009933 | FALSE | 1.311852 | FALSE | Endothelia Capillary E |
| GATCAGTC db/db2 | db/db | 372  | 0.030859 | FALSE | 47.82206 | TRUE  |                        |
| GATCAGTC db/db2 | db/db | 5016 | 0.037564 | FALSE | 0.988586 | FALSE | Endothelia Venous EC   |
| GATCAGTT db/db2 | db/db | 6363 | 0.019455 | FALSE | 0.827723 | FALSE | Endothelia Capillary E |
| GATCATGC db/db2 | db/db | 1113 | 0.019106 | FALSE | 1.346873 | FALSE | Endothelia EC-C4       |
| GATCCCTC db/db2 | db/db | 2233 | 0.070386 | FALSE | 1.342858 | FALSE | Photoreceptor          |
| GATCCCTC db/db2 | db/db | 5616 | 0.042704 | FALSE | 1.072033 | FALSE | Endothelia Venous EC   |
| GATCCCTC db/db2 | db/db | 637  | 0.026328 | FALSE | 0.427084 | FALSE | Photoreceptor          |
| GATCCCTC db/db2 | db/db | 4449 | 0.026328 | FALSE | 0.616204 | FALSE | Photoreceptor          |
| GATCCCTC db/db2 | db/db | 1996 | 0.051646 | FALSE | 2.075956 | FALSE | Photoreceptor          |
| GATCCCTT db/db2 | db/db | 4055 | 0.026328 | FALSE | 1.045371 | FALSE | Endothelia Venous EC   |
| GATCGTA db/db2  | db/db | 1733 | 0.020536 | FALSE | 0.538008 | FALSE | Photoreceptor          |
| GATCGTAT db/db2 | db/db | 2841 | 0.030318 | FALSE | 0.883662 | FALSE | Endothelia EC-C4       |
| GATCGTAT db/db2 | db/db | 2924 | 0.025868 | FALSE | 1.56075  | FALSE | Neuron                 |
| GATGACTC db/db2 | db/db | 2463 | 0.024971 | FALSE | 1.390949 | FALSE | Endothelia Capillary E |
| GATGACTC db/db2 | db/db | 1416 | 0.076994 | FALSE | 1.764816 | FALSE | Photoreceptor          |
| GATGACTC db/db2 | db/db | 7830 | 0.04192  | FALSE | 0.796147 | FALSE | Endothelia EC-C4       |
| GATGACTC db/db2 | db/db | 2097 | 0.012814 | FALSE | 1.034689 | FALSE | Endothelia Venous EC   |
| GATGACTC db/db2 | db/db | 3108 | 0.017758 | FALSE | 1.265423 | FALSE | Endothelia Capillary E |
| GATGACTT db/db2 | db/db | 2383 | 0.020536 | FALSE | 1.039118 | FALSE | Endothelia EC-C4       |
| GATGAGG db/db2  | db/db | 2298 | 0.063221 | FALSE | 1.600243 | FALSE | Pericyte               |
| GATGAGG db/db2  | db/db | 1635 | 0.016488 | FALSE | 1.495211 | FALSE | Endothelia Capillary E |
| GATGAGG db/db2  | db/db | 1163 | 0.04192  | FALSE | 2.022361 | FALSE | Photoreceptor          |
| GATGAGG db/db2  | db/db | 7559 | 0.022455 | FALSE | 0.642847 | FALSE | Photoreceptor          |
| GATGAGG db/db2  | db/db | 904  | 0.059406 | FALSE | 1.45507  | FALSE | Photoreceptor          |
| GATGAGG db/db2  | db/db | 2509 | 0.098234 | FALSE | 0.962814 | FALSE | Endothelia EC-C4       |
| GATGAGG db/db2  | db/db | 863  | 0.037564 | FALSE | 1.056123 | FALSE | Photoreceptor          |
| GATGATC db/db2  | db/db | 1433 | 0.034334 | FALSE | 1.823725 | FALSE | Endothelia Capillary E |
| GATGATC db/db2  | db/db | 3306 | 0.036891 | FALSE | 1.494345 | FALSE | Photoreceptor          |
| GATGATC db/db2  | db/db | 1888 | 0.08663  | FALSE | 1.368464 | FALSE | Photoreceptor          |
| GATGATCT db/db2 | db/db | 1243 | 0.032546 | FALSE | 2.368649 | FALSE | Pericyte               |
| GATGCTAC db/db2 | db/db | 489  | 0.020908 | FALSE | 2.341175 | FALSE | Photoreceptor          |
| GATGCTAC db/db2 | db/db | 2210 | 0.020536 | FALSE | 0.395715 | FALSE | Photoreceptor          |
| GATGCTAC db/db2 | db/db | 2420 | 0.022857 | FALSE | 1.058069 | FALSE | Endothelia Aterial EC  |
| GATGCTAT db/db2 | db/db | 1348 | 0.015879 | FALSE | 1.736315 | FALSE | Endothelia Capillary E |
| GATGCTAT db/db2 | db/db | 4579 | 0.048732 | FALSE | 1.266916 | FALSE | Endothelia Venous EC   |
| GATGGAG db/db2  | db/db | 7191 | 0.025868 | FALSE | 0.74473  | FALSE | Endothelia EC-C4       |
| GATTCGA db/db2  | db/db | 5047 | 0.058205 | FALSE | 1.149666 | FALSE | Photoreceptor          |
| GATTCGAC db/db2 | db/db | 2311 | 0.015879 | FALSE | 1.251587 | FALSE | Endothelia Capillary E |

|                 |       |      |          |       |          |       |                        |
|-----------------|-------|------|----------|-------|----------|-------|------------------------|
| GATTCGAC db/db2 | db/db | 1027 | 0.014997 | FALSE | 0.382636 | FALSE | Photoreceptor          |
| GATTCGAC db/db2 | db/db | 613  | 0.020908 | FALSE | 1.375443 | FALSE | Muller cell            |
| GATTCGAC db/db2 | db/db | 1130 | 0.005958 | FALSE | 1.442624 | FALSE | Endothelia Capillary E |
| GATTCGAC db/db2 | db/db | 3027 | 0.064568 | FALSE | 1.783231 | FALSE | Muller cell            |
| GATTCGAT db/db2 | db/db | 1222 | 0.017758 | FALSE | 0        | FALSE | Photoreceptor          |
| GATTCGAT db/db2 | db/db | 590  | 0.070386 | FALSE | 4.902565 | FALSE | Muller cell            |
| GATTCGAT db/db2 | db/db | 9187 | 0.017434 | FALSE | 0.933084 | FALSE | Photoreceptor          |
| GATTCTTA db/db2 | db/db | 2259 | 0.009933 | FALSE | 0.914435 | FALSE | Endothelia Capillary E |
| GATTCTTC db/db2 | db/db | 6631 | 0.019106 | FALSE | 0.746523 | FALSE | Photoreceptor          |
| GATTCTTC db/db2 | db/db | 444  | 0.036891 | FALSE | 7.189543 | TRUE  |                        |
| GATTCTTG db/db2 | db/db | 331  | 0.009933 | FALSE | 4.091868 | FALSE | Muller cell            |
| GATTCTTT db/db2 | db/db | 2962 | 0.064568 | FALSE | 1.401911 | FALSE | Pericyte               |
| GATTGGTC db/db2 | db/db | 1139 | 0.04192  | FALSE | 1.919435 | FALSE | Photoreceptor          |
| GATTTCTC db/db2 | db/db | 8489 | 0.095727 | FALSE | 1.003163 | FALSE | Neuron                 |
| GATTTCTC db/db2 | db/db | 370  | 0.112477 | TRUE  | 20.91062 | TRUE  |                        |
| GATTTCTC db/db2 | db/db | 1540 | 0.03313  | FALSE | 1.326951 | FALSE | Pericyte               |
| GATTTCTG db/db2 | db/db | 465  | 0.411992 | TRUE  | 15.38462 | TRUE  |                        |
| GATTTCTT db/db2 | db/db | 1286 | 0.007058 | FALSE | 1.60824  | FALSE | Endothelia Capillary E |
| GATTTCTT db/db2 | db/db | 7236 | 0.013876 | FALSE | 0.68684  | FALSE | Endothelia Capillary E |
| GCAACAT db/db2  | db/db | 2287 | 0.018088 | FALSE | 1.295293 | FALSE | Endothelia Capillary E |
| GCAACATC db/db2 | db/db | 1517 | 0.058205 | FALSE | 1.428554 | FALSE | Endothelia Capillary E |
| GCAACATT db/db2 | db/db | 698  | 0.017434 | FALSE | 3.083835 | FALSE | Neuron                 |
| GCAACATT db/db2 | db/db | 3226 | 0.036232 | FALSE | 1.26804  | FALSE | Endothelia Venous EC   |
| GCAACCG db/db2  | db/db | 8351 | 0.023266 | FALSE | 0.575989 | FALSE | Photoreceptor          |
| GCAACCG db/db2  | db/db | 2006 | 0.029266 | FALSE | 1.220781 | FALSE | Photoreceptor          |
| GCAACCG db/db2  | db/db | 6390 | 0.026328 | FALSE | 0.803518 | FALSE | Photoreceptor          |
| GCAACCGC db/db2 | db/db | 2483 | 0.049679 | FALSE | 1.601897 | FALSE | Photoreceptor          |
| GCAACCGC db/db2 | db/db | 406  | 0.095727 | FALSE | 1.634414 | FALSE | Endothelia Capillary E |
| GCAACCGC db/db2 | db/db | 3654 | 0.018088 | FALSE | 1.006054 | FALSE | Endothelia EC-C4       |
| GCAACCGC db/db2 | db/db | 5685 | 0.049679 | FALSE | 0.948101 | FALSE | Photoreceptor          |
| GCAACCGT db/db2 | db/db | 1775 | 0.04192  | FALSE | 1.822561 | FALSE | Photoreceptor          |
| GCACATAC db/db2 | db/db | 802  | 0.076994 | FALSE | 1.683293 | FALSE | Muller cell            |
| GCACGGT db/db2  | db/db | 291  | 0.05065  | FALSE | 56.50685 | TRUE  |                        |
| GCACGGT db/db2  | db/db | 1111 | 0.03313  | FALSE | 0.734723 | FALSE | Photoreceptor          |
| GCACGTG db/db2  | db/db | 3705 | 0.020171 | FALSE | 1.520114 | FALSE | Photoreceptor          |
| GCACGTGC db/db2 | db/db | 800  | 0.078788 | FALSE | 3.143499 | FALSE | Muller cell            |
| GCACGTGC db/db2 | db/db | 2316 | 0.019455 | FALSE | 1.25306  | FALSE | Endothelia Capillary E |
| GCACGTGC db/db2 | db/db | 1475 | 0.013074 | FALSE | 1.300028 | FALSE | Pericyte               |
| GCACTAA db/db2  | db/db | 7825 | 0.021669 | FALSE | 0.771463 | FALSE | Photoreceptor          |
| GCACTAA db/db2  | db/db | 889  | 0.061912 | FALSE | 3.274646 | FALSE | Muller cell            |
| GCACTAAC db/db2 | db/db | 2385 | 0.131994 | TRUE  | 0.970638 | FALSE |                        |
| GCACTAAT db/db2 | db/db | 6722 | 0.038251 | FALSE | 1.177809 | FALSE | Photoreceptor          |
| GCAGCCA db/db2  | db/db | 2790 | 0.012303 | FALSE | 0.899205 | FALSE | Endothelia EC-C4       |
| GCAGCCA db/db2  | db/db | 5264 | 0.011081 | FALSE | 0.947489 | FALSE | Endothelia Venous EC   |
| GCAGCCA db/db2  | db/db | 1352 | 0.024534 | FALSE | 1.922051 | FALSE | Endothelia EC-C4       |
| GCAGCTG db/db2  | db/db | 5441 | 0.064568 | FALSE | 1.257415 | FALSE | Photoreceptor          |
| GCAGCTGC db/db2 | db/db | 5822 | 0.024971 | FALSE | 0.894839 | FALSE | Endothelia Venous EC   |

|          |        |       |      |          |       |          |       |                        |
|----------|--------|-------|------|----------|-------|----------|-------|------------------------|
| GCAGCTG  | db/db2 | db/db | 3525 | 0.010846 | FALSE | 1.410445 | FALSE | Photoreceptor          |
| GCAGCTG  | db/db2 | db/db | 484  | 0.041154 | FALSE | 13.26816 | TRUE  |                        |
| GCAGGCT  | db/db2 | db/db | 9275 | 0.018088 | FALSE | 0.497725 | FALSE | Photoreceptor          |
| GCAGGCT  | db/db2 | db/db | 3417 | 0.009493 | FALSE | 1.417409 | FALSE | Photoreceptor          |
| GCAGGCT  | db/db2 | db/db | 2895 | 0.036891 | FALSE | 1.190661 | FALSE | Endothelia Capillary E |
| GCAGTTA  | db/db2 | db/db | 988  | 0.011081 | FALSE | 1.718534 | FALSE | Endothelia Aterial EC  |
| GCAGTTA  | db/db2 | db/db | 997  | 0.057037 | FALSE | 1.636503 | FALSE | Photoreceptor          |
| GCAGTTA  | db/db2 | db/db | 311  | 0.031411 | FALSE | 53.17019 | TRUE  |                        |
| GCAGTTA  | db/db2 | db/db | 1376 | 0.011081 | FALSE | 1.35435  | FALSE | Endothelia EC-C4       |
| GCAGTTA  | db/db2 | db/db | 591  | 0.012557 | FALSE | 3.03369  | FALSE | Muller cell            |
| GCAGTTA  | db/db2 | db/db | 362  | 0.060641 | FALSE | 42.96978 | TRUE  |                        |
| GCATCGG  | db/db2 | db/db | 1808 | 0.012303 | FALSE | 1.126678 | FALSE | Endothelia Capillary E |
| GCATCGG  | db/db2 | db/db | 2897 | 0.020536 | FALSE | 1.220902 | FALSE | Endothelia EC-C4       |
| GCATCGG  | db/db2 | db/db | 959  | 0.054795 | FALSE | 0.630728 | FALSE | Photoreceptor          |
| GCATCGG  | db/db2 | db/db | 546  | 0.073582 | FALSE | 7.044025 | TRUE  |                        |
| GCATCGG  | db/db2 | db/db | 371  | 0.022059 | FALSE | 1.835076 | FALSE | Endothelia Capillary E |
| GCATCGG  | db/db2 | db/db | 1806 | 0.009277 | FALSE | 0.839063 | FALSE | Endothelia EC-C4       |
| GCATCGG  | db/db2 | db/db | 585  | 0.030859 | FALSE | 0.77917  | FALSE | Photoreceptor          |
| GCATCGG  | db/db2 | db/db | 2007 | 0.022857 | FALSE | 1.238484 | FALSE | Photoreceptor          |
| GCATCTCA | db/db2 | db/db | 1116 | 0.018761 | FALSE | 0.471634 | FALSE | Photoreceptor          |
| GCATCTCA | db/db2 | db/db | 2151 | 0.030859 | FALSE | 1.304472 | FALSE | Endothelia Capillary E |
| GCATCTCT | db/db2 | db/db | 2448 | 0.012557 | FALSE | 0.958014 | FALSE | Endothelia EC-C4       |
| GCATGAT  | db/db2 | db/db | 1397 | 0.022857 | FALSE | 1.582382 | FALSE | Photoreceptor          |
| GCATGAT  | db/db2 | db/db | 2219 | 0.013876 | FALSE | 1.114526 | FALSE | Endothelia Capillary E |
| GCATTAG  | db/db2 | db/db | 2717 | 0.073582 | FALSE | 1.547866 | FALSE | Endothelia Capillary E |
| GCATTAG  | db/db2 | db/db | 8270 | 0.017758 | FALSE | 0.706805 | FALSE | Photoreceptor          |
| GCCAACG  | db/db2 | db/db | 5273 | 0.109375 | TRUE  | 3.677492 | FALSE |                        |
| GCCAACG  | db/db2 | db/db | 3920 | 0.035586 | FALSE | 1.115616 | FALSE | Photoreceptor          |
| GCCAACG  | db/db2 | db/db | 2469 | 0.039671 | FALSE | 0.614799 | FALSE | Photoreceptor          |
| GCCAACG  | db/db2 | db/db | 3778 | 0.012052 | FALSE | 0.986832 | FALSE | Endothelia Venous EC   |
| GCCAACG  | db/db2 | db/db | 951  | 0.020908 | FALSE | 1.869282 | FALSE | Photoreceptor          |
| GCCAACG  | db/db2 | db/db | 2353 | 0.075259 | FALSE | 1.262783 | FALSE | Photoreceptor          |
| GCCAGCA  | db/db2 | db/db | 2354 | 0.036891 | FALSE | 1.066401 | FALSE | Photoreceptor          |
| GCCAGCA  | db/db2 | db/db | 1013 | 0.091004 | FALSE | 1.947227 | FALSE | Photoreceptor          |
| GCCAGCA  | db/db2 | db/db | 7349 | 0.082569 | FALSE | 1.077489 | FALSE | Neuron                 |
| GCCAGCA  | db/db2 | db/db | 829  | 0.078788 | FALSE | 3.440987 | FALSE | Muller cell            |
| GCCAGCA  | db/db2 | db/db | 4292 | 0.031973 | FALSE | 1.053567 | FALSE | Endothelia Venous EC   |
| GCCAGGT  | db/db2 | db/db | 969  | 0.052669 | FALSE | 1.394251 | FALSE | Photoreceptor          |
| GCCAGGT  | db/db2 | db/db | 599  | 0.021286 | FALSE | 2.319488 | FALSE | Endothelia Capillary E |
| GCCAGGT  | db/db2 | db/db | 6704 | 0.016799 | FALSE | 0.610989 | FALSE | Photoreceptor          |
| GCCAGGT  | db/db2 | db/db | 3991 | 0.027273 | FALSE | 1.199266 | FALSE | Photoreceptor          |
| GCCAGGT  | db/db2 | db/db | 2303 | 0.014429 | FALSE | 1.240428 | FALSE | Endothelia Aterial EC  |
| GCCAGGT  | db/db2 | db/db | 2053 | 0.017434 | FALSE | 1.394778 | FALSE | Endothelia Capillary E |
| GCCAGGT  | db/db2 | db/db | 1069 | 0.08663  | FALSE | 0.820151 | FALSE | Photoreceptor          |
| GCCAGTG  | db/db2 | db/db | 8241 | 0.024105 | FALSE | 0.691957 | FALSE | Photoreceptor          |
| GCCAGTG  | db/db2 | db/db | 2881 | 0.011081 | FALSE | 1.125198 | FALSE | Endothelia Venous EC   |
| GCCATGG  | db/db2 | db/db | 3580 | 0.040404 | FALSE | 1.383575 | FALSE | Microglia              |

|                 |       |      |          |       |          |       |                         |
|-----------------|-------|------|----------|-------|----------|-------|-------------------------|
| GCCATGGC db/db2 | db/db | 9490 | 0.017434 | FALSE | 0.566837 | FALSE | Photoreceptor           |
| GCCATGGC db/db2 | db/db | 4322 | 0.03313  | FALSE | 1.091768 | FALSE | Endothelia EC-C4        |
| GCCATTCC db/db2 | db/db | 9198 | 0.016799 | FALSE | 0.69703  | FALSE | Photoreceptor           |
| GCCATTCT db/db2 | db/db | 771  | 0.120957 | TRUE  | 1.281139 | FALSE |                         |
| GCCCAGAC db/db2 | db/db | 2318 | 0.007833 | FALSE | 1.218875 | FALSE | Endothelia Capillary EC |
| GCCCAGAC db/db2 | db/db | 3674 | 0.041154 | FALSE | 1.315968 | FALSE | Photoreceptor           |
| GCCCGAAC db/db2 | db/db | 1002 | 0.049679 | FALSE | 0.957231 | FALSE | Photoreceptor           |
| GCCCGAAC db/db2 | db/db | 6464 | 0.100845 | TRUE  | 2.139713 | FALSE |                         |
| GCCCGAAC db/db2 | db/db | 1344 | 0.022059 | FALSE | 1.712614 | FALSE | Endothelia Capillary EC |
| GCCCGAAC db/db2 | db/db | 6687 | 0.018088 | FALSE | 0.645605 | FALSE | Photoreceptor           |
| GCCCGAAC db/db2 | db/db | 448  | 0.052669 | FALSE | 37.7169  | TRUE  |                         |
| GCCCGAAC db/db2 | db/db | 5142 | 0.047807 | FALSE | 0.996157 | FALSE | Endothelia EC-C4        |
| GCCCGAAC db/db2 | db/db | 9102 | 0.025416 | FALSE | 0.622825 | FALSE | Photoreceptor           |
| GCCGATGC db/db2 | db/db | 1736 | 0.005958 | FALSE | 1.071121 | FALSE | Pericyte                |
| GCCGATGC db/db2 | db/db | 1891 | 0.088776 | FALSE | 10.69042 | TRUE  |                         |
| GCCGTGAC db/db2 | db/db | 1321 | 0.095727 | FALSE | 8.055236 | TRUE  |                         |
| GCCGTGAC db/db2 | db/db | 519  | 0.082569 | FALSE | 4.866029 | FALSE | Endothelia Aterial EC   |
| GCCTGTTA db/db2 | db/db | 5585 | 0.028251 | FALSE | 1.066676 | FALSE | Photoreceptor           |
| GCCTGTTC db/db2 | db/db | 1644 | 0.023682 | FALSE | 0.662557 | FALSE | Photoreceptor           |
| GCCTGTTC db/db2 | db/db | 2970 | 0.445833 | TRUE  | 6.944665 | TRUE  |                         |
| GCCTGTTC db/db2 | db/db | 3367 | 0.014997 | FALSE | 1.021858 | FALSE | Endothelia Venous EC    |
| GCGAGAAC db/db2 | db/db | 455  | 0.060641 | FALSE | 4.346031 | FALSE | Muller cell             |
| GCGAGAAC db/db2 | db/db | 6461 | 0.036232 | FALSE | 1.111474 | FALSE | Photoreceptor           |
| GCGAGAAC db/db2 | db/db | 366  | 0.046906 | FALSE | 43.56659 | TRUE  |                         |
| GCGAGAAC db/db2 | db/db | 7197 | 0.025416 | FALSE | 0.891765 | FALSE | Photoreceptor           |
| GCGAGAAC db/db2 | db/db | 1201 | 0.024971 | FALSE | 2.381123 | FALSE | Photoreceptor           |
| GCGATCGA db/db2 | db/db | 7228 | 0.04192  | FALSE | 0.863482 | FALSE | Photoreceptor           |
| GCGATCGA db/db2 | db/db | 818  | 0.061912 | FALSE | 3.508569 | FALSE | Muller cell             |
| GCGATCGA db/db2 | db/db | 3587 | 0.017114 | FALSE | 1.078564 | FALSE | Endothelia Venous EC    |
| GCGGAAAC db/db2 | db/db | 435  | 0.010846 | FALSE | 1.474597 | FALSE | Endothelia Aterial EC   |
| GCGGAAAC db/db2 | db/db | 2826 | 0.004762 | FALSE | 0.934179 | FALSE | Neuron                  |
| GCGGAAAC db/db2 | db/db | 399  | 0.065957 | FALSE | 39.05882 | TRUE  |                         |
| GCGGAAAC db/db2 | db/db | 2603 | 0.150727 | TRUE  | 4.669793 | FALSE |                         |
| GCGGAAAC db/db2 | db/db | 2012 | 0.039671 | FALSE | 1.247819 | FALSE | Photoreceptor           |
| GCGGATCA db/db2 | db/db | 8639 | 0.153234 | TRUE  | 2.204905 | FALSE |                         |
| GCGGATCA db/db2 | db/db | 6378 | 0.031411 | FALSE | 0.8181   | FALSE | Photoreceptor           |
| GCGGATCA db/db2 | db/db | 7294 | 0.020171 | FALSE | 0.798707 | FALSE | Photoreceptor           |
| GCGGATCA db/db2 | db/db | 1663 | 0.063221 | FALSE | 1.134543 | FALSE | Photoreceptor           |
| GCGGATCA db/db2 | db/db | 410  | 0.012052 | FALSE | 2.009614 | FALSE | Photoreceptor           |
| GCGGATCA db/db2 | db/db | 5694 | 0.098234 | FALSE | 0.816153 | FALSE | Endothelia Venous EC    |
| GCGGATCA db/db2 | db/db | 1869 | 0.020908 | FALSE | 1.378991 | FALSE | Endothelia Capillary EC |
| GCGGATCA db/db2 | db/db | 1762 | 0.038251 | FALSE | 1.44437  | FALSE | Neuron                  |
| GCGGATCA db/db2 | db/db | 1057 | 0.078788 | FALSE | 1.684736 | FALSE | Muller cell             |
| GCGTGCAA db/db2 | db/db | 403  | 0.027273 | FALSE | 3.31751  | FALSE | Endothelia Capillary EC |
| GCGTGCAA db/db2 | db/db | 1044 | 0.04192  | FALSE | 0.569924 | FALSE | Photoreceptor           |
| GCGTGCAA db/db2 | db/db | 963  | 0.03313  | FALSE | 2.364465 | FALSE | Photoreceptor           |
| GCGTGCAA db/db2 | db/db | 959  | 0.038953 | FALSE | 1.765596 | FALSE | Photoreceptor           |

|          |        |       |       |          |       |          |       |                        |
|----------|--------|-------|-------|----------|-------|----------|-------|------------------------|
| GCGTGCA  | db/db2 | db/db | 800   | 0.030859 | FALSE | 0.546954 | FALSE | Photoreceptor          |
| GCGTGCA  | db/db2 | db/db | 2099  | 0.009933 | FALSE | 1.128786 | FALSE | Endothelia Capillary E |
| GCGTTTCG | db/db2 | db/db | 7887  | 0.034334 | FALSE | 0.791957 | FALSE | Photoreceptor          |
| GCTACAA  | db/db2 | db/db | 1182  | 0.007249 | FALSE | 2.215905 | FALSE | Endothelia Capillary E |
| GCTACAA  | db/db2 | db/db | 4640  | 0.040404 | FALSE | 0.957919 | FALSE | Endothelia Capillary E |
| GCTACCTC | db/db2 | db/db | 2457  | 0.060641 | FALSE | 1.032406 | FALSE | Photoreceptor          |
| GCTACCTC | db/db2 | db/db | 714   | 0.007441 | FALSE | 1.81035  | FALSE | Muller cell            |
| GCTACCTC | db/db2 | db/db | 698   | 0.016799 | FALSE | 0.181603 | FALSE | Photoreceptor          |
| GCTACCTT | db/db2 | db/db | 619   | 0.073582 | FALSE | 13.07252 | TRUE  |                        |
| GCTCAAA  | db/db2 | db/db | 2297  | 0.020536 | FALSE | 0.391066 | FALSE | Photoreceptor          |
| GCTCAAA  | db/db2 | db/db | 5022  | 0.017114 | FALSE | 0.520414 | FALSE | Photoreceptor          |
| GCTCAAA  | db/db2 | db/db | 466   | 0.106408 | TRUE  | 13.46154 | TRUE  |                        |
| GCTCAAT  | db/db2 | db/db | 10204 | 0.082569 | FALSE | 0.653918 | FALSE | Photoreceptor          |
| GCTGAAT  | db/db2 | db/db | 4796  | 0.029266 | FALSE | 1.11332  | FALSE | Photoreceptor          |
| GCTGAAT  | db/db2 | db/db | 773   | 0.036891 | FALSE | 3.878011 | FALSE | Muller cell            |
| GCTGAAT  | db/db2 | db/db | 904   | 0.080645 | FALSE | 7.929515 | TRUE  |                        |
| GCTGCAG  | db/db2 | db/db | 1848  | 0.013876 | FALSE | 1.141498 | FALSE | Endothelia Capillary E |
| GCTGCAG  | db/db2 | db/db | 578   | 0.023682 | FALSE | 3.066525 | FALSE | Endothelia Capillary E |
| GCTGCAG  | db/db2 | db/db | 9349  | 0.055901 | FALSE | 0.804293 | FALSE | Photoreceptor          |
| GCTGCAG  | db/db2 | db/db | 1703  | 0.038953 | FALSE | 1.683616 | FALSE | Endothelia Aterial EC  |
| GCTGGGT  | db/db2 | db/db | 3323  | 0.009277 | FALSE | 1.239856 | FALSE | Photoreceptor          |
| GCTGGGT  | db/db2 | db/db | 2187  | 0.017434 | FALSE | 1.528789 | FALSE | Endothelia Capillary E |
| GCTGGGT  | db/db2 | db/db | 5049  | 0.024534 | FALSE | 0.687424 | FALSE | Photoreceptor          |
| GCTGGGT  | db/db2 | db/db | 3455  | 0.106408 | TRUE  | 3.227125 | FALSE |                        |
| GCTGGGT  | db/db2 | db/db | 1767  | 0.010614 | FALSE | 1.191114 | FALSE | Endothelia Capillary E |
| GCTTCACG | db/db2 | db/db | 1415  | 0.006499 | FALSE | 0.918172 | FALSE | Endothelia EC-C4       |
| GCTTCACG | db/db2 | db/db | 1263  | 0.028754 | FALSE | 1.704829 | FALSE | Endothelia Capillary E |
| GCTTGGG  | db/db2 | db/db | 3732  | 0.031973 | FALSE | 1.001742 | FALSE | Photoreceptor          |
| GCTTGGG  | db/db2 | db/db | 3994  | 0.075259 | FALSE | 1.186076 | FALSE | Photoreceptor          |
| GCTTGGG  | db/db2 | db/db | 1753  | 0.049679 | FALSE | 1.902622 | FALSE | Photoreceptor          |
| GCTTGGG  | db/db2 | db/db | 499   | 0.080645 | FALSE | 16.96065 | TRUE  |                        |
| GCTTTCGA | db/db2 | db/db | 1237  | 0.030318 | FALSE | 0.984285 | FALSE | Photoreceptor          |
| GCTTTCGA | db/db2 | db/db | 5452  | 0.036232 | FALSE | 0.847006 | FALSE | Endothelia EC-C4       |
| GCTTTCGA | db/db2 | db/db | 3968  | 0.057037 | FALSE | 1.057524 | FALSE | Photoreceptor          |
| GCTTTCGA | db/db2 | db/db | 1293  | 0.044326 | FALSE | 2.005077 | FALSE | Photoreceptor          |
| GCTTTCGC | db/db2 | db/db | 781   | 0.046906 | FALSE | 0.751241 | FALSE | Photoreceptor          |
| GCTTTCGC | db/db2 | db/db | 902   | 0.098234 | FALSE | 2.049481 | FALSE | Photoreceptor          |
| GCTTTCGC | db/db2 | db/db | 337   | 0.034334 | FALSE | 38.90187 | TRUE  |                        |
| GCTTTCGT | db/db2 | db/db | 1987  | 0.029787 | FALSE | 1.653666 | FALSE | Endothelia Capillary E |
| GGAACCC  | db/db2 | db/db | 4150  | 0.033726 | FALSE | 1.151627 | FALSE | Photoreceptor          |
| GGAAGTG  | db/db2 | db/db | 584   | 0.030318 | FALSE | 2.341514 | FALSE | Endothelia Capillary E |
| GGAAGTG  | db/db2 | db/db | 736   | 0.041154 | FALSE | 1.566742 | FALSE | Muller cell            |
| GGAAGTG  | db/db2 | db/db | 674   | 0.042704 | FALSE | 2.793217 | FALSE | Muller cell            |
| GGAATCT  | db/db2 | db/db | 2794  | 0.008644 | FALSE | 1.220143 | FALSE | Endothelia Capillary E |
| GGAATCT  | db/db2 | db/db | 3498  | 0.084562 | FALSE | 1.895976 | FALSE | Muller cell            |
| GGAATCT  | db/db2 | db/db | 2836  | 0.023266 | FALSE | 0.958297 | FALSE | Photoreceptor          |
| GGAATCT  | db/db2 | db/db | 496   | 0.014997 | FALSE | 3.514659 | FALSE | Muller cell            |

|                 |       |      |          |       |          |       |                         |
|-----------------|-------|------|----------|-------|----------|-------|-------------------------|
| GGAATCTT db/db2 | db/db | 393  | 0.038953 | FALSE | 1.900092 | FALSE | Endothelia Venous EC    |
| GGAATGG db/db2  | db/db | 7943 | 0.024105 | FALSE | 0.833198 | FALSE | Endothelia EC-C4        |
| GGAATGG db/db2  | db/db | 1973 | 0.018422 | FALSE | 1.296464 | FALSE | Endothelia Capillary EC |
| GGACGTC db/db2  | db/db | 512  | 0.023682 | FALSE | 0.974752 | FALSE | Photoreceptor           |
| GGACGTC db/db2  | db/db | 683  | 0.019106 | FALSE | 2.282244 | FALSE | Endothelia Capillary EC |
| GGACGTC db/db2  | db/db | 1990 | 0.012052 | FALSE | 1.284377 | FALSE | Endothelia Capillary EC |
| GGAGAAC db/db2  | db/db | 732  | 0.067388 | FALSE | 8.631773 | TRUE  |                         |
| GGAGCAA db/db2  | db/db | 925  | 0.076994 | FALSE | 1.712377 | FALSE | Photoreceptor           |
| GGAGCAA db/db2  | db/db | 2365 | 0.021286 | FALSE | 0.826941 | FALSE | Photoreceptor           |
| GGAGGAT db/db2  | db/db | 1719 | 0.112037 | TRUE  | 1.540667 | FALSE |                         |
| GGAGGAT db/db2  | db/db | 535  | 0.08663  | FALSE | 1.662213 | FALSE | Endothelia Aterial EC   |
| GGAGGAT db/db2  | db/db | 4968 | 0.08663  | FALSE | 0.904387 | FALSE | Photoreceptor           |
| GGAGGAT db/db2  | db/db | 496  | 0.060641 | FALSE | 4.710117 | FALSE | Muller cell             |
| GGAGGTA db/db2  | db/db | 570  | 0.042704 | FALSE | 30.08596 | TRUE  |                         |
| GGAGGTA db/db2  | db/db | 1335 | 0.025416 | FALSE | 3.036899 | FALSE | Muller cell             |
| GGAGGTA db/db2  | db/db | 5794 | 0.016799 | FALSE | 0.878107 | FALSE | Endothelia EC-C4        |
| GGAGGTA db/db2  | db/db | 1426 | 0.003497 | FALSE | 1.203905 | FALSE | Pericyte                |
| GGATCTA db/db2  | db/db | 428  | 0.026328 | FALSE | 7.262569 | TRUE  |                         |
| GGATCTA db/db2  | db/db | 3202 | 0.010614 | FALSE | 1.479844 | FALSE | Photoreceptor           |
| GGATCTA db/db2  | db/db | 626  | 0.126437 | TRUE  | 8.900001 | TRUE  |                         |
| GGATGTT db/db2  | db/db | 1279 | 0.05065  | FALSE | 1.871602 | FALSE | Photoreceptor           |
| GGATGTT db/db2  | db/db | 8057 | 0.032546 | FALSE | 0.75658  | FALSE | Photoreceptor           |
| GGATGTT db/db2  | db/db | 1784 | 0.032546 | FALSE | 0.682785 | FALSE | Photoreceptor           |
| GGATGTT db/db2  | db/db | 888  | 0.009712 | FALSE | 1.530179 | FALSE | Endothelia Capillary EC |
| GGATGTT db/db2  | db/db | 2275 | 0.027273 | FALSE | 1.077983 | FALSE | Endothelia Capillary EC |
| GGATGTT db/db2  | db/db | 3436 | 0.075259 | FALSE | 1.191295 | FALSE | Endothelia Venous EC    |
| GGATGTT db/db2  | db/db | 905  | 0.055901 | FALSE | 1.936201 | FALSE | Photoreceptor           |
| GGATGTT db/db2  | db/db | 1145 | 0.021286 | FALSE | 1.97677  | FALSE | Photoreceptor           |
| GGCACGT db/db2  | db/db | 2343 | 0.052669 | FALSE | 1.132144 | FALSE | Photoreceptor           |
| GGCACGT db/db2  | db/db | 956  | 0.045165 | FALSE | 1.221063 | FALSE | Photoreceptor           |
| GGCACGT db/db2  | db/db | 4839 | 0.027758 | FALSE | 1.307653 | FALSE | Photoreceptor           |
| GGCACGT db/db2  | db/db | 1398 | 0.053718 | FALSE | 1.945182 | FALSE | Muller cell             |
| GGCACGT db/db2  | db/db | 1177 | 0.034334 | FALSE | 1.064795 | FALSE | Photoreceptor           |
| GGCAGTC db/db2  | db/db | 2204 | 0.059406 | FALSE | 1.201033 | FALSE | Endothelia Aterial EC   |
| GGCGTCA db/db2  | db/db | 1397 | 0.026796 | FALSE | 1.699363 | FALSE | Endothelia Capillary EC |
| GGCGTCA db/db2  | db/db | 9129 | 0.022857 | FALSE | 0.692942 | FALSE | Photoreceptor           |
| GGCGTCA db/db2  | db/db | 9170 | 0.040404 | FALSE | 0.671419 | FALSE | Photoreceptor           |
| GGCGTCA db/db2  | db/db | 1794 | 0.017434 | FALSE | 0.360271 | FALSE | Photoreceptor           |
| GGCGTCA db/db2  | db/db | 4252 | 0.053718 | FALSE | 1.056453 | FALSE | Endothelia EC-C4        |
| GGCGTCA db/db2  | db/db | 3128 | 0.022857 | FALSE | 1.243436 | FALSE | Endothelia Capillary EC |
| GGCGTCA db/db2  | db/db | 3264 | 0.031411 | FALSE | 1.27541  | FALSE | Endothelia EC-C4        |
| GGCTGTG db/db2  | db/db | 2690 | 0.028754 | FALSE | 1.129885 | FALSE | Endothelia Capillary EC |
| GGCTGTG db/db2  | db/db | 557  | 0.034334 | FALSE | 0.593448 | FALSE | Photoreceptor           |
| GGCTGTG db/db2  | db/db | 3842 | 0.082569 | FALSE | 8.60613  | TRUE  |                         |
| GGCTGTG db/db2  | db/db | 1125 | 0.036232 | FALSE | 0.907085 | FALSE | Photoreceptor           |
| GGCTTGG db/db2  | db/db | 3008 | 0.076994 | FALSE | 1.048115 | FALSE | Photoreceptor           |
| GGCTTGG db/db2  | db/db | 2965 | 0.053718 | FALSE | 0.982698 | FALSE | Photoreceptor           |

|                 |       |      |          |       |          |       |                        |
|-----------------|-------|------|----------|-------|----------|-------|------------------------|
| GGCTTGGC db/db2 | db/db | 1990 | 0.037564 | FALSE | 0.541699 | FALSE | Photoreceptor          |
| GGCTTGGC db/db2 | db/db | 8921 | 0.015581 | FALSE | 0.741006 | FALSE | Photoreceptor          |
| GGCTTGGC db/db2 | db/db | 732  | 0.073582 | FALSE | 4.23482  | FALSE | Muller cell            |
| GGCTTTCA db/db2 | db/db | 1250 | 0.029266 | FALSE | 0.305663 | FALSE | Photoreceptor          |
| GGCTTTCC db/db2 | db/db | 6774 | 0.027758 | FALSE | 0.910869 | FALSE | Photoreceptor          |
| GGCTTTCC db/db2 | db/db | 7230 | 0.020908 | FALSE | 0.712445 | FALSE | Endothelia EC-C4       |
| GGCTTTCC db/db2 | db/db | 407  | 0.113205 | TRUE  | 1.995724 | FALSE |                        |
| GGCTTTCC db/db2 | db/db | 9020 | 0.084562 | FALSE | 0.721178 | FALSE | Photoreceptor          |
| GGCTTTCT db/db2 | db/db | 435  | 0.038251 | FALSE | 0.424847 | FALSE | Endothelia Aterial EC  |
| GGGAAGT db/db2  | db/db | 3555 | 0.022455 | FALSE | 1.206196 | FALSE | Endothelia Venous EC   |
| GGGAAGT db/db2  | db/db | 937  | 0.010846 | FALSE | 3.475535 | FALSE | Photoreceptor          |
| GGGAAGT db/db2  | db/db | 6485 | 0.143501 | TRUE  | 2.464355 | FALSE |                        |
| GGGAAGT db/db2  | db/db | 3597 | 0.058205 | FALSE | 0.732056 | FALSE | Photoreceptor          |
| GGGACAA db/db2  | db/db | 4151 | 0.015287 | FALSE | 1.305465 | FALSE | Endothelia Capillary E |
| GGGACAA db/db2  | db/db | 3729 | 0.034954 | FALSE | 1.154898 | FALSE | Photoreceptor          |
| GGGACAA db/db2  | db/db | 9716 | 0.017114 | FALSE | 0.598783 | FALSE | Photoreceptor          |
| GGGACCT db/db2  | db/db | 795  | 0.024105 | FALSE | 0.663839 | FALSE | Photoreceptor          |
| GGGACCT db/db2  | db/db | 5078 | 0.046906 | FALSE | 1.126951 | FALSE | Photoreceptor          |
| GGGACTC db/db2  | db/db | 6768 | 0.040404 | FALSE | 0.966791 | FALSE | Photoreceptor          |
| GGGAGAT db/db2  | db/db | 969  | 0.033726 | FALSE | 1.282241 | FALSE | Photoreceptor          |
| GGGAGAT db/db2  | db/db | 4395 | 0.010614 | FALSE | 0.943694 | FALSE | Endothelia Venous EC   |
| GGGAGAT db/db2  | db/db | 4677 | 0.044326 | FALSE | 0.807933 | FALSE | Photoreceptor          |
| GGGAGAT db/db2  | db/db | 710  | 0.043505 | FALSE | 2.223409 | FALSE | Photoreceptor          |
| GGGAGTA db/db2  | db/db | 887  | 0.022059 | FALSE | 0.704216 | FALSE | Photoreceptor          |
| GGGAGTA db/db2  | db/db | 4619 | 0.126437 | TRUE  | 3.810475 | FALSE |                        |
| GGGAGTA db/db2  | db/db | 3337 | 0.106408 | TRUE  | 2.402606 | FALSE |                        |
| GGGATCC db/db2  | db/db | 1065 | 0.028754 | FALSE | 0.787383 | FALSE | Photoreceptor          |
| GGGATCC db/db2  | db/db | 4550 | 0.009063 | FALSE | 0.98847  | FALSE | Endothelia EC-C4       |
| GGGATCC db/db2  | db/db | 2282 | 0.053718 | FALSE | 1.143776 | FALSE | Pericyte               |
| GGGATCC db/db2  | db/db | 1559 | 0.095727 | FALSE | 22.29102 | TRUE  |                        |
| GGGATGA db/db2  | db/db | 2877 | 0.018761 | FALSE | 0.945934 | FALSE | Photoreceptor          |
| GGGATGA db/db2  | db/db | 3460 | 0.029787 | FALSE | 1.028289 | FALSE | Endothelia EC-C4       |
| GGGATGA db/db2  | db/db | 3624 | 0.012814 | FALSE | 1.171863 | FALSE | Endothelia Capillary E |
| GGGCCAT db/db2  | db/db | 2081 | 0.100845 | TRUE  | 7.098471 | TRUE  |                        |
| GGGCGTT db/db2  | db/db | 329  | 0.034954 | FALSE | 32.02847 | TRUE  |                        |
| GGGCGTT db/db2  | db/db | 1337 | 0.084562 | FALSE | 1.964318 | FALSE | Photoreceptor          |
| GGGCGTT db/db2  | db/db | 1556 | 0.042704 | FALSE | 3.762923 | FALSE | Muller cell            |
| GGGCTAC db/db2  | db/db | 698  | 0.007636 | FALSE | 1.645576 | FALSE | Pericyte               |
| GGGCTAC db/db2  | db/db | 3130 | 0.009493 | FALSE | 0.8757   | FALSE | Endothelia Capillary E |
| GGGCTAC db/db2  | db/db | 3411 | 0.010384 | FALSE | 0.967414 | FALSE | Endothelia Capillary E |
| GGGCTAC db/db2  | db/db | 1635 | 0.016488 | FALSE | 0.997674 | FALSE | Endothelia Capillary E |
| GGGCTCA db/db2  | db/db | 715  | 0.03313  | FALSE | 3.176023 | FALSE | Neuron                 |
| GGGCTCA db/db2  | db/db | 3567 | 0.045165 | FALSE | 0.823751 | FALSE | Photoreceptor          |
| GGGCTCA db/db2  | db/db | 4337 | 0.091004 | FALSE | 6.858316 | TRUE  |                        |
| GGGCTCA db/db2  | db/db | 3719 | 0.088776 | FALSE | 1.949227 | FALSE | Neuron                 |
| GGGCTCA db/db2  | db/db | 9720 | 0.019455 | FALSE | 0.658027 | FALSE | Photoreceptor          |
| GGGCTCA db/db2  | db/db | 2342 | 0.020908 | FALSE | 1.375106 | FALSE | Endothelia Capillary E |

|                 |       |      |          |       |          |       |                        |
|-----------------|-------|------|----------|-------|----------|-------|------------------------|
| GGGCTCA1 db/db2 | db/db | 3742 | 0.014711 | FALSE | 1.068864 | FALSE | Endothelia EC-C4       |
| GGGCTCA1 db/db2 | db/db | 829  | 0.027273 | FALSE | 2.033502 | FALSE | Muller cell            |
| GGGTAGA1 db/db2 | db/db | 8577 | 0.031973 | FALSE | 0.628629 | FALSE | Photoreceptor          |
| GGGTAGA1 db/db2 | db/db | 1975 | 0.041154 | FALSE | 1.275394 | FALSE | Photoreceptor          |
| GGGTAGA1 db/db2 | db/db | 4160 | 0.022455 | FALSE | 0.966683 | FALSE | Endothelia Venous EC   |
| GGGTAGA1 db/db2 | db/db | 466  | 0.119124 | TRUE  | 3.150406 | FALSE |                        |
| GGGTAGA1 db/db2 | db/db | 2451 | 0.017434 | FALSE | 1.491032 | FALSE | Pericyte               |
| GGGTATT1 db/db2 | db/db | 6715 | 0.019455 | FALSE | 0.958978 | FALSE | Photoreceptor          |
| GGGTATT1 db/db2 | db/db | 7515 | 0.029787 | FALSE | 0.798366 | FALSE | Photoreceptor          |
| GGGTATT1 db/db2 | db/db | 728  | 0.064568 | FALSE | 2.029355 | FALSE | Endothelia Capillary E |
| GGGTCAC1 db/db2 | db/db | 488  | 0.015287 | FALSE | 3.417057 | FALSE | Endothelia Capillary E |
| GGGTCAC1 db/db2 | db/db | 3041 | 0.046906 | FALSE | 1.409896 | FALSE | Photoreceptor          |
| GGGTCTG1 db/db2 | db/db | 4350 | 0.115723 | TRUE  | 6.981705 | TRUE  |                        |
| GGGTCTG1 db/db2 | db/db | 4796 | 0.044326 | FALSE | 1.04093  | FALSE | Endothelia Venous EC   |
| GGGTCTG1 db/db2 | db/db | 480  | 0.036891 | FALSE | 2.000407 | FALSE | Endothelia Venous EC   |
| GGGTCTG1 db/db2 | db/db | 2430 | 0.013338 | FALSE | 1.25441  | FALSE | Photoreceptor          |
| GGGTGAA1 db/db2 | db/db | 1304 | 0.024534 | FALSE | 1.198003 | FALSE | Microglia              |
| GGGTGAA1 db/db2 | db/db | 227  | 0.047807 | FALSE | 2.918691 | FALSE | Muller cell            |
| GGGTGAA1 db/db2 | db/db | 3829 | 0.014997 | FALSE | 0.974414 | FALSE | Endothelia EC-C4       |
| GGGTGAA1 db/db2 | db/db | 366  | 0.035586 | FALSE | 4.165166 | FALSE | Muller cell            |
| GGGTGAA1 db/db2 | db/db | 6381 | 0.071958 | FALSE | 0.866482 | FALSE | Endothelia Venous EC   |
| GGGTGTC1 db/db2 | db/db | 6454 | 0.035586 | FALSE | 0.751869 | FALSE | Photoreceptor          |
| GGGTGTC1 db/db2 | db/db | 2054 | 0.015287 | FALSE | 1.141362 | FALSE | Endothelia Capillary E |
| GGGTGTC1 db/db2 | db/db | 485  | 0.019106 | FALSE | 2.24607  | FALSE | Photoreceptor          |
| GGGTGTC1 db/db2 | db/db | 1295 | 0.014711 | FALSE | 2.119295 | FALSE | Muller cell            |
| GGGTGTC1 db/db2 | db/db | 1411 | 0.082569 | FALSE | 15.33652 | TRUE  |                        |
| GGGTTAT1 db/db2 | db/db | 3521 | 0.009933 | FALSE | 0.84237  | FALSE | Neuron                 |
| GGGTTAT1 db/db2 | db/db | 1327 | 0.051646 | FALSE | 16.51406 | TRUE  |                        |
| GGGTTAT1 db/db2 | db/db | 2031 | 0.046906 | FALSE | 1.003034 | FALSE | Photoreceptor          |
| GGGTTAT1 db/db2 | db/db | 2284 | 0.008032 | FALSE | 0.865238 | FALSE | Endothelia EC-C4       |
| GGGTTAT1 db/db2 | db/db | 2329 | 0.109375 | TRUE  | 2.797705 | FALSE |                        |
| GGGTTAT1 db/db2 | db/db | 2799 | 0.093319 | FALSE | 1.575252 | FALSE | Muller cell            |
| GGGTTTA1 db/db2 | db/db | 1999 | 0.017434 | FALSE | 1.134957 | FALSE | Endothelia EC-C4       |
| GGGTTTA1 db/db2 | db/db | 6764 | 0.025868 | FALSE | 1.112699 | FALSE | Photoreceptor          |
| GGGTTTA1 db/db2 | db/db | 4446 | 0.016181 | FALSE | 0.914928 | FALSE | Photoreceptor          |
| GGGTTTA1 db/db2 | db/db | 1043 | 0.027273 | FALSE | 0.252484 | FALSE | Photoreceptor          |
| GGGTTTA1 db/db2 | db/db | 552  | 0.048732 | FALSE | 3.559468 | FALSE | Neuron                 |
| GGTAATC1 db/db2 | db/db | 543  | 0.034954 | FALSE | 46.31061 | TRUE  |                        |
| GGTAATC1 db/db2 | db/db | 8608 | 0.122691 | TRUE  | 1.503171 | FALSE |                        |
| GGTAATC1 db/db2 | db/db | 1360 | 0.039671 | FALSE | 1.81941  | FALSE | Photoreceptor          |
| GGTAATC1 db/db2 | db/db | 1581 | 0.036232 | FALSE | 3.632443 | FALSE | Muller cell            |
| GGTAATC1 db/db2 | db/db | 2545 | 0.004116 | FALSE | 1.351339 | FALSE | Neuron                 |
| GGTAATC1 db/db2 | db/db | 4273 | 0.098234 | FALSE | 1.069992 | FALSE | Photoreceptor          |
| GGTAGAG1 db/db2 | db/db | 646  | 0.08663  | FALSE | 3.746243 | FALSE | Muller cell            |
| GGTAGAG1 db/db2 | db/db | 2260 | 0.05065  | FALSE | 1.026142 | FALSE | Photoreceptor          |
| GGTAGAG1 db/db2 | db/db | 661  | 0.093319 | FALSE | 12.54682 | TRUE  |                        |
| GGTAGAG1 db/db2 | db/db | 1348 | 0.076994 | FALSE | 7.116954 | TRUE  |                        |



|                 |       |      |          |       |          |       |                        |
|-----------------|-------|------|----------|-------|----------|-------|------------------------|
| GGTAGAG db/db2  | db/db | 4897 | 0.031973 | FALSE | 0.877752 | FALSE | Photoreceptor          |
| GGTCACG db/db2  | db/db | 3297 | 0.04192  | FALSE | 1.180863 | FALSE | Microglia              |
| GGTCACG db/db2  | db/db | 1099 | 0.164835 | TRUE  | 2.536232 | FALSE |                        |
| GGTCACG db/db2  | db/db | 561  | 0.084562 | FALSE | 15.09217 | TRUE  |                        |
| GGTCACG db/db2  | db/db | 452  | 0.031411 | FALSE | 23.21429 | TRUE  |                        |
| GGTCACG db/db2  | db/db | 4974 | 0.023266 | FALSE | 1.253419 | FALSE | Endothelia Venous EC   |
| GGTCTGG db/db2  | db/db | 441  | 0.021669 | FALSE | 48.47364 | TRUE  |                        |
| GGTCTGG db/db2  | db/db | 1318 | 0.010846 | FALSE | 1.15684  | FALSE | Endothelia EC-C4       |
| GGTCTGG db/db2  | db/db | 2703 | 0.009493 | FALSE | 1.687704 | FALSE | Photoreceptor          |
| GGTCTGG db/db2  | db/db | 700  | 0.028754 | FALSE | 4.604518 | FALSE | Muller cell            |
| GGTCTGG db/db2  | db/db | 3273 | 0.005264 | FALSE | 1.407504 | FALSE | Neuron                 |
| GGTGAAG db/db2  | db/db | 782  | 0.013605 | FALSE | 0.50539  | FALSE | Photoreceptor          |
| GGTGAAG db/db2  | db/db | 390  | 0.084562 | FALSE | 16.09375 | TRUE  |                        |
| GGTGAAG db/db2  | db/db | 1998 | 0.041154 | FALSE | 1.071938 | FALSE | Photoreceptor          |
| GGTGAAG db/db2  | db/db | 3601 | 0.011081 | FALSE | 1.26019  | FALSE | Endothelia Capillary E |
| GGTGAAG db/db2  | db/db | 2074 | 0.046025 | FALSE | 1.038669 | FALSE | Photoreceptor          |
| GGTGAAG db/db2  | db/db | 2252 | 0.027758 | FALSE | 1.238946 | FALSE | Endothelia Aterial EC  |
| GGTGAAG db/db2  | db/db | 1088 | 0.041154 | FALSE | 2.643414 | FALSE | Photoreceptor          |
| GGTGAAG db/db2  | db/db | 915  | 0.016488 | FALSE | 0.192516 | FALSE | Photoreceptor          |
| GGTGATT db/db2  | db/db | 1562 | 0.048732 | FALSE | 1.092765 | FALSE | Photoreceptor          |
| GGTGATT db/db2  | db/db | 866  | 0.012052 | FALSE | 1.315065 | FALSE | Endothelia Capillary E |
| GGTGATT db/db2  | db/db | 2397 | 0.015581 | FALSE | 1.175954 | FALSE | Endothelia Capillary E |
| GGTGATT db/db2  | db/db | 3396 | 0.038953 | FALSE | 0.920748 | FALSE | Photoreceptor          |
| GGTGATT db/db2  | db/db | 890  | 0.091004 | FALSE | 3.020541 | FALSE | Pericyte               |
| GGTGATT db/db2  | db/db | 2015 | 0.007441 | FALSE | 1.161682 | FALSE | Endothelia Capillary E |
| GGTGGCT db/db2  | db/db | 888  | 0.064568 | FALSE | 5.906593 | TRUE  |                        |
| GGTGGCT db/db2  | db/db | 922  | 0.038953 | FALSE | 0.788457 | FALSE | Photoreceptor          |
| GGTGGCT db/db2  | db/db | 701  | 0.088776 | FALSE | 3.481997 | FALSE | Endothelia Capillary E |
| GGTGGCT db/db2  | db/db | 884  | 0.027273 | FALSE | 4.906034 | FALSE | Muller cell            |
| GGTGGCT db/db2  | db/db | 493  | 0.022857 | FALSE | 3.267266 | FALSE | Muller cell            |
| GGTGTG db/db2   | db/db | 2065 | 0.047807 | FALSE | 1.299321 | FALSE | Endothelia Venous EC   |
| GGTGTG db/db2   | db/db | 2124 | 0.028754 | FALSE | 1.282787 | FALSE | Endothelia Capillary E |
| GGTGTG db/db2   | db/db | 3448 | 0.039671 | FALSE | 0.668321 | FALSE | Photoreceptor          |
| GGTGTG db/db2   | db/db | 6488 | 0.038251 | FALSE | 0.766495 | FALSE | Photoreceptor          |
| GGTGTG db/db2   | db/db | 925  | 0.026328 | FALSE | 1.926702 | FALSE | Endothelia EC-C4       |
| GGTGTTA db/db2  | db/db | 7993 | 0.016181 | FALSE | 0.680924 | FALSE | Photoreceptor          |
| GGTGTTA db/db2  | db/db | 6634 | 0.078788 | FALSE | 1.047659 | FALSE | Neuron                 |
| GGTGTTA db/db2  | db/db | 5359 | 0.026796 | FALSE | 1.094698 | FALSE | Endothelia Venous EC   |
| GGTTAAC db/db2  | db/db | 2747 | 0.018761 | FALSE | 0.967751 | FALSE | Endothelia Venous EC   |
| GGTTAAC db/db2  | db/db | 4221 | 0.032546 | FALSE | 1.074853 | FALSE | Photoreceptor          |
| GGTTAAC db/db2  | db/db | 2807 | 0.014997 | FALSE | 1.140703 | FALSE | Photoreceptor          |
| GGTTACT db/db2  | db/db | 3603 | 0.035586 | FALSE | 0.935946 | FALSE | Endothelia Capillary E |
| GGTTCTCA db/db2 | db/db | 916  | 0.014429 | FALSE | 2.178565 | FALSE | Endothelia Capillary E |
| GGTTCTCA db/db2 | db/db | 338  | 0.076994 | FALSE | 4.958817 | FALSE | Muller cell            |
| GGTTCTCC db/db2 | db/db | 3328 | 0.080645 | FALSE | 1.059891 | FALSE | Photoreceptor          |
| GGTTCTCC db/db2 | db/db | 315  | 0.03313  | FALSE | 47.54768 | TRUE  |                        |
| GGTTCTCT db/db2 | db/db | 591  | 0.03313  | FALSE | 3.330991 | FALSE | Muller cell            |

|                 |       |      |          |       |          |       |                        |
|-----------------|-------|------|----------|-------|----------|-------|------------------------|
| GGTTGTA/ db/db2 | db/db | 624  | 0.013876 | FALSE | 2.986336 | FALSE | Muller cell            |
| GGTTGTAC db/db2 | db/db | 2671 | 0.032546 | FALSE | 1.35541  | FALSE | Endothelia Capillary E |
| GGTTGTAC db/db2 | db/db | 4976 | 0.023266 | FALSE | 0.892023 | FALSE | Photoreceptor          |
| GTAACAC/ db/db2 | db/db | 2291 | 0.024971 | FALSE | 1.014647 | FALSE | Endothelia Aterial EC  |
| GTAACACC db/db2 | db/db | 1001 | 0.04192  | FALSE | 0.862842 | FALSE | Photoreceptor          |
| GTAACACC db/db2 | db/db | 1544 | 0.011081 | FALSE | 1.485629 | FALSE | Endothelia Capillary E |
| GTAACACC db/db2 | db/db | 2591 | 0.067388 | FALSE | 0.719174 | FALSE | Photoreceptor          |
| GTAACCA/ db/db2 | db/db | 639  | 0.026328 | FALSE | 0.339095 | FALSE | Photoreceptor          |
| GTAACCAC db/db2 | db/db | 863  | 0.020908 | FALSE | 1.683137 | FALSE | Microglia              |
| GTAACCAC db/db2 | db/db | 1355 | 0.058205 | FALSE | 1.592372 | FALSE | Photoreceptor          |
| GTAACCAT db/db2 | db/db | 502  | 0.019455 | FALSE | 4.123001 | FALSE | Muller cell            |
| GTAACCAT db/db2 | db/db | 5779 | 0.028754 | FALSE | 0.93416  | FALSE | Photoreceptor          |
| GTAAGTCC db/db2 | db/db | 1251 | 0.071958 | FALSE | 14.85859 | TRUE  |                        |
| GTAAGTCC db/db2 | db/db | 2021 | 0.021669 | FALSE | 1.025336 | FALSE | Endothelia Capillary E |
| GTAAGTCT db/db2 | db/db | 1590 | 0.071958 | FALSE | 2.190417 | FALSE | Muller cell            |
| GTAATCGC db/db2 | db/db | 1405 | 0.075259 | FALSE | 1.388662 | FALSE | Photoreceptor          |
| GTAATCGC db/db2 | db/db | 856  | 0.04192  | FALSE | 0.949231 | FALSE | Photoreceptor          |
| GTAATCGT db/db2 | db/db | 1074 | 0.009277 | FALSE | 1.283745 | FALSE | Endothelia Aterial EC  |
| GTAATCGT db/db2 | db/db | 715  | 0.049679 | FALSE | 31.2     | TRUE  |                        |
| GTAATGC/ db/db2 | db/db | 897  | 0.018422 | FALSE | 0.640184 | FALSE | Photoreceptor          |
| GTAATGCT db/db2 | db/db | 2015 | 0.017758 | FALSE | 0.340125 | FALSE | Photoreceptor          |
| GTAATGCT db/db2 | db/db | 1150 | 0.031973 | FALSE | 1.735366 | FALSE | Neuron                 |
| GTAATGCT db/db2 | db/db | 5376 | 0.100845 | TRUE  | 1.55712  | FALSE |                        |
| GTACAACC db/db2 | db/db | 1587 | 0.024534 | FALSE | 0.342067 | FALSE | Photoreceptor          |
| GTACAACC db/db2 | db/db | 5713 | 0.024534 | FALSE | 0.977834 | FALSE | Photoreceptor          |
| GTACAACC db/db2 | db/db | 5430 | 0.17103  | TRUE  | 2.689831 | FALSE |                        |
| GTACAACC db/db2 | db/db | 1069 | 0.026328 | FALSE | 0.883682 | FALSE | Photoreceptor          |
| GTACAGTC db/db2 | db/db | 5476 | 0.013876 | FALSE | 0.517923 | FALSE | Photoreceptor          |
| GTACAGTC db/db2 | db/db | 216  | 0.031411 | FALSE | 59.53125 | TRUE  |                        |
| GTACAGTC db/db2 | db/db | 7941 | 0.024534 | FALSE | 1.010025 | FALSE | Photoreceptor          |
| GTACAGTT db/db2 | db/db | 798  | 0.037564 | FALSE | 0.229141 | FALSE | Photoreceptor          |
| GTAGAAA/ db/db2 | db/db | 2320 | 0.047807 | FALSE | 1.253555 | FALSE | Endothelia Venous EC   |
| GTAGAAA/ db/db2 | db/db | 3072 | 0.061912 | FALSE | 9.261202 | TRUE  |                        |
| GTAGAAA( db/db2 | db/db | 417  | 0.022857 | FALSE | 0.451154 | FALSE | Photoreceptor          |
| GTAGAAA( db/db2 | db/db | 1844 | 0.044326 | FALSE | 0.918822 | FALSE | Photoreceptor          |
| GTAGAAA( db/db2 | db/db | 3064 | 0.044326 | FALSE | 1.388575 | FALSE | Endothelia Capillary E |
| GTAGAAA( db/db2 | db/db | 2814 | 0.040404 | FALSE | 0.659941 | FALSE | Photoreceptor          |
| GTAGAGG db/db2  | db/db | 499  | 0.038251 | FALSE | 2.327966 | FALSE | Endothelia Capillary E |
| GTAGAGG db/db2  | db/db | 2860 | 0.008438 | FALSE | 1.026634 | FALSE | Endothelia EC-C4       |
| GTAGAGG db/db2  | db/db | 886  | 0.059406 | FALSE | 0.373103 | FALSE | Photoreceptor          |
| GTAGAGG db/db2  | db/db | 5054 | 0.015287 | FALSE | 0.748458 | FALSE | Endothelia EC-C4       |
| GTAGAGG db/db2  | db/db | 2395 | 0.063221 | FALSE | 2.129822 | FALSE | Photoreceptor          |
| GTAGAGG db/db2  | db/db | 394  | 0.031973 | FALSE | 4.962702 | FALSE | Muller cell            |
| GTAGAGG db/db2  | db/db | 3735 | 0.022857 | FALSE | 0.537205 | FALSE | Photoreceptor          |
| GTAGATCC db/db2 | db/db | 4132 | 0.017434 | FALSE | 0.807982 | FALSE | Endothelia EC-C4       |
| GTAGATCC db/db2 | db/db | 3912 | 0.048732 | FALSE | 0.893293 | FALSE | Photoreceptor          |
| GTAGATCC db/db2 | db/db | 1971 | 0.006317 | FALSE | 0.931116 | FALSE | Endothelia Capillary E |

|                 |       |      |          |       |          |       |                        |
|-----------------|-------|------|----------|-------|----------|-------|------------------------|
| GTAGATCT db/db2 | db/db | 701  | 0.006317 | FALSE | 2.027624 | FALSE | Pericyte               |
| GTAGCTAC db/db2 | db/db | 4603 | 0.044326 | FALSE | 0.950406 | FALSE | Endothelia Venous EC   |
| GTAGCTAC db/db2 | db/db | 1853 | 0.029787 | FALSE | 1.715717 | FALSE | Endothelia Capillary E |
| GTAGGAG db/db2  | db/db | 3815 | 0.048732 | FALSE | 1.766715 | FALSE | Endothelia Capillary E |
| GTAGGAG db/db2  | db/db | 5710 | 0.017434 | FALSE | 0.576939 | FALSE | Photoreceptor          |
| GTAGGTT db/db2  | db/db | 1284 | 0.029787 | FALSE | 1.0818   | FALSE | Photoreceptor          |
| GTAGGTT db/db2  | db/db | 1561 | 0.009277 | FALSE | 1.035815 | FALSE | Endothelia Aterial EC  |
| GTAGGTT db/db2  | db/db | 504  | 0.038251 | FALSE | 41.78404 | TRUE  |                        |
| GTAGTAC db/db2  | db/db | 3773 | 0.029266 | FALSE | 0.866632 | FALSE | Photoreceptor          |
| GTAGTAC db/db2  | db/db | 4425 | 0.040404 | FALSE | 1.116049 | FALSE | Photoreceptor          |
| GTAGTACC db/db2 | db/db | 2191 | 0.091004 | FALSE | 1.348647 | FALSE | Photoreceptor          |
| GTAGTACT db/db2 | db/db | 5634 | 0.009063 | FALSE | 0.98482  | FALSE | Endothelia Venous EC   |
| GTATTGGC db/db2 | db/db | 2914 | 0.044326 | FALSE | 1.233459 | FALSE | Photoreceptor          |
| GTATTGGC db/db2 | db/db | 2872 | 0.022059 | FALSE | 1.157581 | FALSE | Endothelia Capillary E |
| GTATTGGC db/db2 | db/db | 4357 | 0.042704 | FALSE | 0.77811  | FALSE | Photoreceptor          |
| GTATTGGT db/db2 | db/db | 4869 | 0.024534 | FALSE | 0.951522 | FALSE | Endothelia EC-C4       |
| GTATTGGT db/db2 | db/db | 9920 | 0.011805 | FALSE | 0.581656 | FALSE | Photoreceptor          |
| GTATTTCC db/db2 | db/db | 354  | 0.038953 | FALSE | 4.717271 | FALSE | Muller cell            |
| GTATTTCC db/db2 | db/db | 1042 | 0.057037 | FALSE | 1.262842 | FALSE | Photoreceptor          |
| GTATTTCT db/db2 | db/db | 1455 | 0.054795 | FALSE | 16.48036 | TRUE  |                        |
| GTATTTCT db/db2 | db/db | 3270 | 0.022857 | FALSE | 2.166172 | FALSE | Neuron                 |
| GTATTTCT db/db2 | db/db | 2184 | 0.016488 | FALSE | 0.562664 | FALSE | Photoreceptor          |
| GTCAAACC db/db2 | db/db | 3051 | 0.022857 | FALSE | 1.195118 | FALSE | Endothelia Capillary E |
| GTCAAACC db/db2 | db/db | 801  | 0.031973 | FALSE | 3.566592 | FALSE | Muller cell            |
| GTCAAACC db/db2 | db/db | 2097 | 0.016181 | FALSE | 1.263597 | FALSE | Endothelia Capillary E |
| GTCAAACC db/db2 | db/db | 1703 | 0.100845 | TRUE  | 6.716886 | TRUE  |                        |
| GTCAAAC db/db2  | db/db | 1031 | 0.017434 | FALSE | 0.624079 | FALSE | Photoreceptor          |
| GTCAAGT db/db2  | db/db | 1608 | 0.018761 | FALSE | 3.428272 | FALSE | Muller cell            |
| GTCAAGTC db/db2 | db/db | 7330 | 0.022857 | FALSE | 0.937154 | FALSE | Photoreceptor          |
| GTCACGG db/db2  | db/db | 5958 | 0.012814 | FALSE | 1.173078 | FALSE | Photoreceptor          |
| GTCACGG db/db2  | db/db | 4569 | 0.014997 | FALSE | 0.614285 | FALSE | Photoreceptor          |
| GTCACGG db/db2  | db/db | 7349 | 0.018088 | FALSE | 0.856044 | FALSE | Photoreceptor          |
| GTCACGG db/db2  | db/db | 4126 | 0.017758 | FALSE | 1.000265 | FALSE | Photoreceptor          |
| GTCACTCC db/db2 | db/db | 3087 | 0.016181 | FALSE | 1.08048  | FALSE | Endothelia Venous EC   |
| GTCACTCC db/db2 | db/db | 937  | 0.014151 | FALSE | 2.952958 | FALSE | Photoreceptor          |
| GTCACTCC db/db2 | db/db | 273  | 0.047807 | FALSE | 0.640505 | FALSE | Muller cell            |
| GTCACTCT db/db2 | db/db | 6752 | 0.021286 | FALSE | 0.960353 | FALSE | Photoreceptor          |
| GTCAGCG db/db2  | db/db | 421  | 0.060641 | FALSE | 3.826828 | FALSE | Muller cell            |
| GTCAGCG db/db2  | db/db | 2257 | 0.053718 | FALSE | 1.443825 | FALSE | Endothelia Venous EC   |
| GTCAGCG db/db2  | db/db | 7265 | 0.028754 | FALSE | 0.910815 | FALSE | Photoreceptor          |
| GTCAGCG db/db2  | db/db | 2028 | 0.159016 | TRUE  | 4.756563 | FALSE |                        |
| GTCAGCG db/db2  | db/db | 5003 | 0.014711 | FALSE | 0.951677 | FALSE | Endothelia EC-C4       |
| GTCAGCG db/db2  | db/db | 3905 | 0.130374 | TRUE  | 3.453808 | FALSE |                        |
| GTCATCCA db/db2 | db/db | 553  | 0.15354  | TRUE  | 27.26531 | TRUE  |                        |
| GTCATCCC db/db2 | db/db | 2664 | 0.031973 | FALSE | 1.066293 | FALSE | Photoreceptor          |
| GTCATCCC db/db2 | db/db | 590  | 0.042704 | FALSE | 2.628954 | FALSE | Muller cell            |
| GTCATCCC db/db2 | db/db | 2550 | 0.014151 | FALSE | 1.182303 | FALSE | Endothelia Capillary E |

|                 |       |       |          |       |          |       |                        |
|-----------------|-------|-------|----------|-------|----------|-------|------------------------|
| GTCATCCC db/db2 | db/db | 1251  | 0.103567 | TRUE  | 9.545454 | TRUE  |                        |
| GTCATCCC db/db2 | db/db | 6990  | 0.04192  | FALSE | 0.827595 | FALSE | Endothelia Venous EC   |
| GTCATCCC db/db2 | db/db | 5446  | 0.036232 | FALSE | 1.078032 | FALSE | Endothelia Venous EC   |
| GTCATGAC db/db2 | db/db | 4238  | 0.148377 | TRUE  | 3.801222 | FALSE |                        |
| GTCATGAC db/db2 | db/db | 2895  | 0.100845 | TRUE  | 4.098864 | FALSE |                        |
| GTCATGAT db/db2 | db/db | 2554  | 0.058205 | FALSE | 1.323671 | FALSE | Photoreceptor          |
| GTCATTTA db/db2 | db/db | 865   | 0.228861 | TRUE  | 3.193278 | FALSE |                        |
| GTCATTTA db/db2 | db/db | 2143  | 0.007441 | FALSE | 1.188666 | FALSE | Endothelia EC-C4       |
| GTCATTTT db/db2 | db/db | 1505  | 0.009277 | FALSE | 1.507676 | FALSE | Endothelia Capillary E |
| GTCCACTA db/db2 | db/db | 6345  | 0.014429 | FALSE | 1.019784 | FALSE | Photoreceptor          |
| GTCCACTC db/db2 | db/db | 827   | 0.060641 | FALSE | 1.682656 | FALSE | Photoreceptor          |
| GTCCACTG db/db2 | db/db | 2440  | 0.012303 | FALSE | 1.140044 | FALSE | Endothelia Aterial EC  |
| GTCCCATA db/db2 | db/db | 1964  | 0.008438 | FALSE | 1.043386 | FALSE | Pericyte               |
| GTCCCATG db/db2 | db/db | 454   | 0.046906 | FALSE | 3.41358  | FALSE | Endothelia Capillary E |
| GTCCCATT db/db2 | db/db | 8682  | 0.065957 | FALSE | 1.364088 | FALSE | Neuron                 |
| GTCCCATT db/db2 | db/db | 2877  | 0.024971 | FALSE | 1.147255 | FALSE | Endothelia Capillary E |
| GTCCTCAA db/db2 | db/db | 2713  | 0.010846 | FALSE | 1.400683 | FALSE | Endothelia Capillary E |
| GTCCTCAA db/db2 | db/db | 2673  | 0.048732 | FALSE | 1.076431 | FALSE | Endothelia EC-C4       |
| GTCCTCAA db/db2 | db/db | 1082  | 0.040404 | FALSE | 1.113552 | FALSE | Photoreceptor          |
| GTCCTCAG db/db2 | db/db | 635   | 0.014429 | FALSE | 3.508482 | FALSE | Photoreceptor          |
| GTCCTCAT db/db2 | db/db | 909   | 0.022857 | FALSE | 0.140169 | FALSE | Photoreceptor          |
| GTCGAAT/ db/db2 | db/db | 3758  | 0.047807 | FALSE | 0.918723 | FALSE | Photoreceptor          |
| GTCGAAT/ db/db2 | db/db | 1445  | 0.024534 | FALSE | 1.529224 | FALSE | Endothelia Capillary E |
| GTCGAATC db/db2 | db/db | 2223  | 0.014711 | FALSE | 1.461828 | FALSE | Endothelia EC-C4       |
| GTCGAATT db/db2 | db/db | 708   | 0.103567 | TRUE  | 19.93068 | TRUE  |                        |
| GTCGAATT db/db2 | db/db | 3965  | 0.027758 | FALSE | 1.085886 | FALSE | Endothelia EC-C4       |
| GTCGCGA/ db/db2 | db/db | 6071  | 0.024534 | FALSE | 0.759575 | FALSE | Photoreceptor          |
| GTCGCGA/ db/db2 | db/db | 1409  | 0.078788 | FALSE | 17.33994 | TRUE  |                        |
| GTCGCGA/ db/db2 | db/db | 2229  | 0.005958 | FALSE | 1.098313 | FALSE | Endothelia Capillary E |
| GTCGCGAC db/db2 | db/db | 363   | 0.076994 | FALSE | 3.2355   | FALSE | Endothelia Capillary E |
| GTCGCGAT db/db2 | db/db | 1603  | 0.024534 | FALSE | 1.893427 | FALSE | Endothelia Venous EC   |
| GTCGTAA/ db/db2 | db/db | 5174  | 0.038953 | FALSE | 0.927859 | FALSE | Endothelia EC-C4       |
| GTCGTAA/ db/db2 | db/db | 2213  | 0.031973 | FALSE | 1.581533 | FALSE | Endothelia Capillary E |
| GTCGTAA/ db/db2 | db/db | 1600  | 0.063221 | FALSE | 1.458103 | FALSE | Pericyte               |
| GTCGTAA/ db/db2 | db/db | 1774  | 0.064568 | FALSE | 1.049551 | FALSE | Photoreceptor          |
| GTCGTTCC db/db2 | db/db | 384   | 0.029266 | FALSE | 3.833983 | FALSE | Photoreceptor          |
| GTCTACCA db/db2 | db/db | 10192 | 0.04192  | FALSE | 0.500695 | FALSE | Photoreceptor          |
| GTCTACCC db/db2 | db/db | 1230  | 0.060641 | FALSE | 20.56149 | TRUE  |                        |
| GTCTACCC db/db2 | db/db | 6548  | 0.026328 | FALSE | 0.861547 | FALSE | Photoreceptor          |
| GTCTACCC db/db2 | db/db | 694   | 0.017114 | FALSE | 2.45095  | FALSE | Photoreceptor          |
| GTCTACCT db/db2 | db/db | 2428  | 0.024534 | FALSE | 0.46415  | FALSE | Photoreceptor          |
| GTCTACCT db/db2 | db/db | 880   | 0.03313  | FALSE | 0.657932 | FALSE | Photoreceptor          |
| GTCTACCT db/db2 | db/db | 9849  | 0.013876 | FALSE | 0.579768 | FALSE | Photoreceptor          |
| GTCTACCT db/db2 | db/db | 352   | 0.042704 | FALSE | 2.016094 | FALSE | Neuron                 |
| GTCTAGAT db/db2 | db/db | 3759  | 0.025416 | FALSE | 1.070025 | FALSE | Endothelia Venous EC   |
| GTCTAGAT db/db2 | db/db | 2332  | 0.075259 | FALSE | 1.965364 | FALSE | Muller cell            |
| GTCTCACA db/db2 | db/db | 4148  | 0.026328 | FALSE | 1.027939 | FALSE | Photoreceptor          |

|                 |       |      |          |       |          |       |                         |
|-----------------|-------|------|----------|-------|----------|-------|-------------------------|
| GTCTCACC db/db2 | db/db | 6716 | 0.052669 | FALSE | 1.030915 | FALSE | Photoreceptor           |
| GTCTCACC db/db2 | db/db | 484  | 0.045165 | FALSE | 3.406018 | FALSE | Muller cell             |
| GTCTCACC db/db2 | db/db | 1308 | 0.052669 | FALSE | 0.628786 | FALSE | Photoreceptor           |
| GTCTCACC db/db2 | db/db | 1607 | 0.024971 | FALSE | 2.191421 | FALSE | Pericyte                |
| GTCTCACC db/db2 | db/db | 5230 | 0.016488 | FALSE | 1.117418 | FALSE | Photoreceptor           |
| GTCTCACC db/db2 | db/db | 5025 | 0.03313  | FALSE | 0.958421 | FALSE | Endothelia Venous EC    |
| GTCTCACT db/db2 | db/db | 9157 | 0.029787 | FALSE | 0.470211 | FALSE | Photoreceptor           |
| GTCTGTCA db/db2 | db/db | 2706 | 0.015879 | FALSE | 1.043127 | FALSE | Photoreceptor           |
| GTCTGTCC db/db2 | db/db | 5047 | 0.038953 | FALSE | 0.946472 | FALSE | Photoreceptor           |
| GTCTGTCT db/db2 | db/db | 3387 | 0.022857 | FALSE | 0.997985 | FALSE | Endothelia Venous EC    |
| GTCTGTCT db/db2 | db/db | 2776 | 0.019455 | FALSE | 0.596836 | FALSE | Photoreceptor           |
| GTCTTTAA db/db2 | db/db | 3695 | 0.042704 | FALSE | 0.805532 | FALSE | Endothelia Venous EC    |
| GTCTTTAA db/db2 | db/db | 1297 | 0.019106 | FALSE | 1.40186  | FALSE | Endothelia Capillary EC |
| GTGACGC db/db2  | db/db | 3057 | 0.032546 | FALSE | 1.117192 | FALSE | Photoreceptor           |
| GTGACGC db/db2  | db/db | 477  | 0.034334 | FALSE | 37.79904 | TRUE  |                         |
| GTGAGCC db/db2  | db/db | 4011 | 0.025416 | FALSE | 0.859668 | FALSE | Endothelia Capillary EC |
| GTGAGCC db/db2  | db/db | 444  | 0.065957 | FALSE | 1.836743 | FALSE | Endothelia Capillary EC |
| GTGAGCC db/db2  | db/db | 3489 | 0.021669 | FALSE | 1.267045 | FALSE | Endothelia Aterial EC   |
| GTGAGGA db/db2  | db/db | 624  | 0.122691 | TRUE  | 11.84211 | TRUE  |                         |
| GTGAGGA db/db2  | db/db | 784  | 0.039671 | FALSE | 44.24268 | TRUE  |                         |
| GTGAGGA db/db2  | db/db | 917  | 0.065957 | FALSE | 0.923684 | FALSE | Photoreceptor           |
| GTGAGGA db/db2  | db/db | 2295 | 0.035586 | FALSE | 1.20709  | FALSE | Photoreceptor           |
| GTGAGGA db/db2  | db/db | 1396 | 0.057037 | FALSE | 1.319435 | FALSE | Photoreceptor           |
| GTGATGT db/db2  | db/db | 341  | 0.030318 | FALSE | 58.89328 | TRUE  |                         |
| GTGCACG db/db2  | db/db | 1302 | 0.357022 | TRUE  | 10.36315 | TRUE  |                         |
| GTGCACG db/db2  | db/db | 796  | 0.020536 | FALSE | 2.046467 | FALSE | Endothelia Capillary EC |
| GTGCACG db/db2  | db/db | 1298 | 0.060641 | FALSE | 2.284153 | FALSE | Photoreceptor           |
| GTGCACG db/db2  | db/db | 4567 | 0.023266 | FALSE | 1.323247 | FALSE | Endothelia Venous EC    |
| GTGCACG db/db2  | db/db | 522  | 0.088776 | FALSE | 19.75758 | TRUE  |                         |
| GTGCAGC db/db2  | db/db | 9802 | 0.057037 | FALSE | 0.548736 | FALSE | Photoreceptor           |
| GTGCAGC db/db2  | db/db | 1863 | 0.17103  | TRUE  | 4.390874 | FALSE |                         |
| GTGCAGC db/db2  | db/db | 5117 | 0.016799 | FALSE | 0.529491 | FALSE | Photoreceptor           |
| GTGCGTG db/db2  | db/db | 890  | 0.03313  | FALSE | 4.515028 | FALSE | Muller cell             |
| GTGCGTG db/db2  | db/db | 3100 | 0.027758 | FALSE | 1.221352 | FALSE | Endothelia Capillary EC |
| GTGCGTG db/db2  | db/db | 482  | 0.070386 | FALSE | 3.433948 | FALSE | Muller cell             |
| GTGCGTG db/db2  | db/db | 374  | 0.049679 | FALSE | 45.47564 | TRUE  |                         |
| GTGCGTG db/db2  | db/db | 7636 | 0.030859 | FALSE | 0.758788 | FALSE | Photoreceptor           |
| GTGCGTG db/db2  | db/db | 1051 | 0.032546 | FALSE | 1.187852 | FALSE | Endothelia EC-C4        |
| GTGCGTG db/db2  | db/db | 2234 | 0.093319 | FALSE | 2.022706 | FALSE | Muller cell             |
| GTGCTGG db/db2  | db/db | 1174 | 0.00687  | FALSE | 1.370756 | FALSE | Endothelia Capillary EC |
| GTGCTGG db/db2  | db/db | 390  | 0.122388 | TRUE  | 2.982107 | FALSE |                         |
| GTGCTGG db/db2  | db/db | 1260 | 0.014429 | FALSE | 1.219261 | FALSE | Endothelia Capillary EC |
| GTGCTGG db/db2  | db/db | 414  | 0.055901 | FALSE | 36.85369 | TRUE  |                         |
| GTGCTGG db/db2  | db/db | 3749 | 0.059406 | FALSE | 1.160782 | FALSE | Photoreceptor           |
| GTGCTTCA db/db2 | db/db | 7329 | 0.018088 | FALSE | 0.613275 | FALSE | Photoreceptor           |
| GTGCTTCA db/db2 | db/db | 5251 | 0.046025 | FALSE | 1.200097 | FALSE | Photoreceptor           |
| GTGCTTCA db/db2 | db/db | 4281 | 0.032546 | FALSE | 1.182715 | FALSE | Endothelia Aterial EC   |

|                 |       |      |          |       |          |       |                        |
|-----------------|-------|------|----------|-------|----------|-------|------------------------|
| GTGCTTCT db/db2 | db/db | 4691 | 0.008852 | FALSE | 0.874512 | FALSE | Endothelia Venous EC   |
| GTGCTTCT db/db2 | db/db | 1318 | 0.088776 | FALSE | 0.71583  | FALSE | Photoreceptor          |
| GTGCTTCT db/db2 | db/db | 1463 | 0.05065  | FALSE | 1.640262 | FALSE | Photoreceptor          |
| GTGGAAG db/db2  | db/db | 5525 | 0.15354  | TRUE  | 1.803374 | FALSE |                        |
| GTGGAAG db/db2  | db/db | 1721 | 0.018088 | FALSE | 1.194387 | FALSE | Endothelia Aterial EC  |
| GTGGAAG db/db2  | db/db | 1394 | 0.054795 | FALSE | 14.21948 | TRUE  |                        |
| GTGGAGA db/db2  | db/db | 1963 | 0.027758 | FALSE | 1.440307 | FALSE | Endothelia Capillary E |
| GTGGAGA db/db2  | db/db | 9113 | 0.022455 | FALSE | 0.644916 | FALSE | Photoreceptor          |
| GTGGAGA db/db2  | db/db | 1093 | 0.018422 | FALSE | 1.65646  | FALSE | Endothelia Capillary E |
| GTGGAGA db/db2  | db/db | 2623 | 0.031973 | FALSE | 1.212338 | FALSE | Endothelia Venous EC   |
| GTGGAGA db/db2  | db/db | 577  | 0.013338 | FALSE | 2.578526 | FALSE | Endothelia Capillary E |
| GTGGAGA db/db2  | db/db | 930  | 0.022455 | FALSE | 0.769377 | FALSE | Photoreceptor          |
| GTGGCGT db/db2  | db/db | 1749 | 0.030318 | FALSE | 0.726793 | FALSE | Photoreceptor          |
| GTGGCGT db/db2  | db/db | 988  | 0.046906 | FALSE | 0.707175 | FALSE | Photoreceptor          |
| GTGGCGT db/db2  | db/db | 532  | 0.012557 | FALSE | 1.39699  | FALSE | Endothelia Capillary E |
| GTGGCGT db/db2  | db/db | 2546 | 0.043505 | FALSE | 1.525915 | FALSE | Photoreceptor          |
| GTGGCGT db/db2  | db/db | 4828 | 0.122388 | TRUE  | 1.933765 | FALSE |                        |
| GTGGCGT db/db2  | db/db | 1977 | 0.017434 | FALSE | 1.388118 | FALSE | Pericyte               |
| GTGGGAA db/db2  | db/db | 2058 | 0.053718 | FALSE | 1.344807 | FALSE | Endothelia EC-C4       |
| GTGGGAA db/db2  | db/db | 3643 | 0.031411 | FALSE | 1.231889 | FALSE | Endothelia Aterial EC  |
| GTGGGAA db/db2  | db/db | 304  | 0.019106 | FALSE | 50.61728 | TRUE  |                        |
| GTGGGAA db/db2  | db/db | 7393 | 0.019455 | FALSE | 0.917304 | FALSE | Photoreceptor          |
| GTGGGAA db/db2  | db/db | 5599 | 0.030318 | FALSE | 0.95827  | FALSE | Photoreceptor          |
| GTGGTTA db/db2  | db/db | 3994 | 0.05065  | FALSE | 1.175388 | FALSE | Photoreceptor          |
| GTGGTTA db/db2  | db/db | 486  | 0.192271 | TRUE  | 21.14914 | TRUE  |                        |
| GTGGTTA db/db2  | db/db | 2266 | 0.002901 | FALSE | 0.763172 | FALSE | Neuron                 |
| GTGGTTA db/db2  | db/db | 3947 | 0.018761 | FALSE | 1.131018 | FALSE | Endothelia Venous EC   |
| GTGGTTA db/db2  | db/db | 2719 | 0.034954 | FALSE | 1.079058 | FALSE | Photoreceptor          |
| GTGTAA db/db2   | db/db | 2935 | 0.058205 | FALSE | 1.134965 | FALSE | Endothelia Capillary E |
| GTGTAA db/db2   | db/db | 970  | 0.032546 | FALSE | 4.086299 | FALSE | Muller cell            |
| GTGTAA db/db2   | db/db | 1142 | 0.080645 | FALSE | 2.033087 | FALSE | Photoreceptor          |
| GTGTAAC db/db2  | db/db | 598  | 0.017114 | FALSE | 0.149892 | FALSE | Endothelia Aterial EC  |
| GTGTCCTA db/db2 | db/db | 260  | 0.042704 | FALSE | 1.498414 | FALSE | Muller cell            |
| GTGTCCTC db/db2 | db/db | 2977 | 0.018761 | FALSE | 1.199353 | FALSE | Endothelia Venous EC   |
| GTGTCCTT db/db2 | db/db | 718  | 0.027758 | FALSE | 0.641382 | FALSE | Photoreceptor          |
| GTGTGAT db/db2  | db/db | 1886 | 0.020536 | FALSE | 1.150678 | FALSE | Endothelia Capillary E |
| GTGTGAT db/db2  | db/db | 354  | 0.045165 | FALSE | 3.213374 | FALSE | Endothelia Capillary E |
| GTGTGAT db/db2  | db/db | 3440 | 0.082569 | FALSE | 0.984492 | FALSE | Endothelia Venous EC   |
| GTGTGGC db/db2  | db/db | 887  | 0.027758 | FALSE | 3.86646  | FALSE | Muller cell            |
| GTGTGGC db/db2  | db/db | 948  | 0.060641 | FALSE | 3.387267 | FALSE | Muller cell            |
| GTGTGGC db/db2  | db/db | 410  | 0.026796 | FALSE | 49.21803 | TRUE  |                        |
| GTGTGGC db/db2  | db/db | 517  | 0.024534 | FALSE | 30.54393 | TRUE  |                        |
| GTGTGGC db/db2  | db/db | 3613 | 0.007441 | FALSE | 1.116091 | FALSE | Endothelia EC-C4       |
| GTGTGGC db/db2  | db/db | 6037 | 0.032546 | FALSE | 0.759719 | FALSE | Photoreceptor          |
| GTGTTAGT db/db2 | db/db | 1626 | 0.054795 | FALSE | 1.056526 | FALSE | Photoreceptor          |
| GTGTTCCA db/db2 | db/db | 4043 | 0.042704 | FALSE | 1.45996  | FALSE | Neuron                 |
| GTGTTCCA db/db2 | db/db | 8535 | 0.122691 | TRUE  | 2.284072 | FALSE |                        |

|                 |       |      |          |       |          |       |                        |
|-----------------|-------|------|----------|-------|----------|-------|------------------------|
| GTGTTCCA db/db2 | db/db | 374  | 0.053718 | FALSE | 27.80807 | TRUE  |                        |
| GTGTTCCC db/db2 | db/db | 2873 | 0.008852 | FALSE | 1.172762 | FALSE | Endothelia Capillary E |
| GTGTTCCC db/db2 | db/db | 1384 | 0.055901 | FALSE | 19.87061 | TRUE  |                        |
| GTTACAG db/db2  | db/db | 4125 | 0.054795 | FALSE | 0.986249 | FALSE | Endothelia Venous EC   |
| GTTACAGC db/db2 | db/db | 2132 | 0.028251 | FALSE | 0.944688 | FALSE | Photoreceptor          |
| GTTACAGC db/db2 | db/db | 877  | 0.015879 | FALSE | 4.293611 | FALSE | Muller cell            |
| GTTACAGC db/db2 | db/db | 693  | 0.014151 | FALSE | 3.88991  | FALSE | Photoreceptor          |
| GTTACAGT db/db2 | db/db | 3363 | 0.029266 | FALSE | 0.703935 | FALSE | Photoreceptor          |
| GTTACCCA db/db2 | db/db | 1804 | 0.041154 | FALSE | 0.917209 | FALSE | Photoreceptor          |
| GTTACCCA db/db2 | db/db | 2848 | 0.014711 | FALSE | 1.144852 | FALSE | Endothelia Venous EC   |
| GTTACCCA db/db2 | db/db | 370  | 0.012814 | FALSE | 3.352105 | FALSE | Photoreceptor          |
| GTTACCCC db/db2 | db/db | 684  | 0.019455 | FALSE | 1.194107 | FALSE | Endothelia Venous EC   |
| GTTACCCC db/db2 | db/db | 3758 | 0.013338 | FALSE | 1.018605 | FALSE | Endothelia EC-C4       |
| GTTACCCT db/db2 | db/db | 3988 | 0.021286 | FALSE | 1.265984 | FALSE | Endothelia Aterial EC  |
| GTTACGAC db/db2 | db/db | 934  | 0.088776 | FALSE | 4.830033 | FALSE | Muller cell            |
| GTTACGAC db/db2 | db/db | 5024 | 0.032546 | FALSE | 0.681799 | FALSE | Photoreceptor          |
| GTTAGACC db/db2 | db/db | 437  | 0.119124 | TRUE  | 17.15543 | TRUE  |                        |
| GTTAGACC db/db2 | db/db | 7348 | 0.019106 | FALSE | 0.535846 | FALSE | Photoreceptor          |
| GTTAGACC db/db2 | db/db | 450  | 0.013338 | FALSE | 4.078375 | FALSE | Pericyte               |
| GTTAGACT db/db2 | db/db | 3207 | 0.023682 | FALSE | 1.202485 | FALSE | Endothelia EC-C4       |
| GTTAGACT db/db2 | db/db | 5431 | 0.021669 | FALSE | 1.112039 | FALSE | Photoreceptor          |
| GTTAGTGC db/db2 | db/db | 9540 | 0.058205 | FALSE | 0.668151 | FALSE | Photoreceptor          |
| GTTAGTGC db/db2 | db/db | 1819 | 0.051646 | FALSE | 1.246946 | FALSE | Photoreceptor          |
| GTTATGG db/db2  | db/db | 608  | 0.004927 | FALSE | 2.168289 | FALSE | Neuron                 |
| GTTATGGC db/db2 | db/db | 2654 | 0.027273 | FALSE | 0.84559  | FALSE | Photoreceptor          |
| GTTATGGC db/db2 | db/db | 590  | 0.034954 | FALSE | 33.64126 | TRUE  |                        |
| GTTCATTA db/db2 | db/db | 9454 | 0.020171 | FALSE | 0.644749 | FALSE | Photoreceptor          |
| GTTCATTC db/db2 | db/db | 4105 | 0.011561 | FALSE | 1.02824  | FALSE | Endothelia Capillary E |
| GTTCATTG db/db2 | db/db | 2507 | 0.055901 | FALSE | 1.595128 | FALSE | Photoreceptor          |
| GTTCATTG db/db2 | db/db | 2725 | 0.017434 | FALSE | 1.525154 | FALSE | Endothelia Capillary E |
| GTTCATTG db/db2 | db/db | 341  | 0.047807 | FALSE | 39.27007 | TRUE  |                        |
| GTTCCGTC db/db2 | db/db | 1815 | 0.049679 | FALSE | 1.378509 | FALSE | Photoreceptor          |
| GTTCCGTT db/db2 | db/db | 486  | 0.063221 | FALSE | 43.22111 | TRUE  |                        |
| GTTCCGTT db/db2 | db/db | 301  | 0.042704 | FALSE | 40.0607  | TRUE  |                        |
| GTTCCGTT db/db2 | db/db | 8449 | 0.019455 | FALSE | 0.662222 | FALSE | Photoreceptor          |
| GTTCCGTT db/db2 | db/db | 402  | 0.034334 | FALSE | 41.04116 | TRUE  |                        |
| GTTCGCTA db/db2 | db/db | 5050 | 0.030318 | FALSE | 0.707409 | FALSE | Photoreceptor          |
| GTTCGCTA db/db2 | db/db | 2945 | 0.027273 | FALSE | 0.846477 | FALSE | Photoreceptor          |
| GTTCGCTC db/db2 | db/db | 357  | 0.047807 | FALSE | 52.17391 | TRUE  |                        |
| GTTCGCTC db/db2 | db/db | 1868 | 0.005095 | FALSE | 0.961754 | FALSE | Endothelia EC-C4       |
| GTTCGCTC db/db2 | db/db | 2902 | 0.016799 | FALSE | 1.167085 | FALSE | Endothelia Venous EC   |
| GTTCGCTT db/db2 | db/db | 2001 | 0.024534 | FALSE | 1.095035 | FALSE | Endothelia Capillary E |
| GTTCTATA db/db2 | db/db | 3908 | 0.008644 | FALSE | 1.535948 | FALSE | Neuron                 |
| GTTCTATA db/db2 | db/db | 1635 | 0.014711 | FALSE | 1.234011 | FALSE | Pericyte               |
| GTTCTATG db/db2 | db/db | 7903 | 0.027758 | FALSE | 0.792861 | FALSE | Photoreceptor          |
| GTTGAAC db/db2  | db/db | 946  | 0.031973 | FALSE | 3.853434 | FALSE | Muller cell            |
| GTTGAAC db/db2  | db/db | 7676 | 0.020171 | FALSE | 0.78771  | FALSE | Photoreceptor          |

|          |        |       |      |          |       |          |       |                        |
|----------|--------|-------|------|----------|-------|----------|-------|------------------------|
| GTTGAACT | db/db2 | db/db | 2343 | 0.010157 | FALSE | 1.430724 | FALSE | Photoreceptor          |
| GTTGCGG  | db/db2 | db/db | 1812 | 0.076994 | FALSE | 19.75176 | TRUE  |                        |
| GTTGCGG  | db/db2 | db/db | 2767 | 0.04192  | FALSE | 0.84647  | FALSE | Photoreceptor          |
| GTTGCGG  | db/db2 | db/db | 3434 | 0.038953 | FALSE | 0.819992 | FALSE | Photoreceptor          |
| GTTGCGG  | db/db2 | db/db | 2440 | 0.08663  | FALSE | 11.54331 | TRUE  |                        |
| GTTGCTCA | db/db2 | db/db | 3484 | 0.153234 | TRUE  | 4.599039 | FALSE |                        |
| GTTGCTCC | db/db2 | db/db | 2836 | 0.103567 | TRUE  | 13.59063 | TRUE  |                        |
| GTTGCTCC | db/db2 | db/db | 4037 | 0.022455 | FALSE | 0.957629 | FALSE | Endothelia Capillary E |
| GTTGCTCC | db/db2 | db/db | 4096 | 0.04192  | FALSE | 1.425391 | FALSE | Photoreceptor          |
| GTTGTAG  | db/db2 | db/db | 542  | 0.082569 | FALSE | 2.722252 | FALSE | Endothelia Capillary E |
| GTTGTAG  | db/db2 | db/db | 584  | 0.058205 | FALSE | 16.87243 | TRUE  |                        |
| GTTGTAG  | db/db2 | db/db | 742  | 0.022857 | FALSE | 0.919663 | FALSE | Photoreceptor          |
| GTTGTAG  | db/db2 | db/db | 1686 | 0.042704 | FALSE | 0.901643 | FALSE | Photoreceptor          |
| GTTGTAG  | db/db2 | db/db | 6266 | 0.012052 | FALSE | 1.220656 | FALSE | Photoreceptor          |
| GTTGTAG  | db/db2 | db/db | 375  | 0.033726 | FALSE | 25.04119 | TRUE  |                        |
| GTTGTAG  | db/db2 | db/db | 1318 | 0.028251 | FALSE | 1.43612  | FALSE | Endothelia Venous EC   |
| GTTGTCCA | db/db2 | db/db | 3035 | 0.115641 | TRUE  | 1.945137 | FALSE |                        |
| GTTGTGA  | db/db2 | db/db | 2302 | 0.061912 | FALSE | 1.290544 | FALSE | Neuron                 |
| GTTGTGA  | db/db2 | db/db | 3461 | 0.04192  | FALSE | 1.461868 | FALSE | Photoreceptor          |
| GTTGTGA  | db/db2 | db/db | 2882 | 0.00687  | FALSE | 1.351681 | FALSE | Neuron                 |
| GTTGTGA  | db/db2 | db/db | 6142 | 0.037564 | FALSE | 0.869786 | FALSE | Photoreceptor          |
| GTTTACTC | db/db2 | db/db | 2233 | 0.015581 | FALSE | 1.133396 | FALSE | Endothelia EC-C4       |
| GTTTACTG | db/db2 | db/db | 5936 | 0.041154 | FALSE | 0.871494 | FALSE | Photoreceptor          |
| GTTTGGA  | db/db2 | db/db | 1097 | 0.049679 | FALSE | 1.510947 | FALSE | Photoreceptor          |
| GTTTGGAC | db/db2 | db/db | 872  | 0.038953 | FALSE | 0.809009 | FALSE | Photoreceptor          |
| GTTTGGAC | db/db2 | db/db | 1006 | 0.068864 | FALSE | 3.482156 | FALSE | Muller cell            |
| GTTTGGAT | db/db2 | db/db | 4338 | 0.016181 | FALSE | 0.719682 | FALSE | Endothelia EC-C4       |
| TAACACG  | db/db2 | db/db | 8292 | 0.011805 | FALSE | 0.901312 | FALSE | Photoreceptor          |
| TAACACG  | db/db2 | db/db | 4561 | 0.063221 | FALSE | 0.744995 | FALSE | Photoreceptor          |
| TAACCAG  | db/db2 | db/db | 6224 | 0.052669 | FALSE | 0.965547 | FALSE | Photoreceptor          |
| TAACCAG  | db/db2 | db/db | 3761 | 0.018761 | FALSE | 1.04694  | FALSE | Endothelia Venous EC   |
| TAACCAG  | db/db2 | db/db | 1113 | 0.054795 | FALSE | 0.817562 | FALSE | Photoreceptor          |
| TAACCAG  | db/db2 | db/db | 1373 | 0.010846 | FALSE | 0.153711 | FALSE | Photoreceptor          |
| TAACCAG  | db/db2 | db/db | 1932 | 0.020536 | FALSE | 3.197769 | FALSE | Muller cell            |
| TAACCAG  | db/db2 | db/db | 1436 | 0.029266 | FALSE | 1.34505  | FALSE | Pericyte               |
| TAACGAC  | db/db2 | db/db | 2441 | 0.013074 | FALSE | 1.02654  | FALSE | Endothelia Capillary E |
| TAACGAC  | db/db2 | db/db | 504  | 0.036891 | FALSE | 3.557156 | FALSE | Photoreceptor          |
| TAACGAC  | db/db2 | db/db | 559  | 0.025868 | FALSE | 3.507086 | FALSE | Endothelia Capillary E |
| TAACGAC  | db/db2 | db/db | 1267 | 0.112477 | TRUE  | 14.13916 | TRUE  |                        |
| TAACGAC  | db/db2 | db/db | 8844 | 0.022455 | FALSE | 0.6539   | FALSE | Photoreceptor          |
| TAACCTCA | db/db2 | db/db | 1672 | 0.029787 | FALSE | 1.150043 | FALSE | Photoreceptor          |
| TAACCTCG | db/db2 | db/db | 2172 | 0.040404 | FALSE | 1.594855 | FALSE | Photoreceptor          |
| TAACCTCT | db/db2 | db/db | 6674 | 0.071958 | FALSE | 1.015823 | FALSE | Neuron                 |
| TAACCTCT | db/db2 | db/db | 2752 | 0.026328 | FALSE | 1.286383 | FALSE | Microglia              |
| TAAGCAC  | db/db2 | db/db | 2403 | 0.03313  | FALSE | 0.868427 | FALSE | Photoreceptor          |
| TAAGCAC  | db/db2 | db/db | 4959 | 0.022455 | FALSE | 0.715265 | FALSE | Photoreceptor          |
| TAAGCAC  | db/db2 | db/db | 3448 | 0.009933 | FALSE | 0.909701 | FALSE | Endothelia Venous EC   |



|          |        |       |      |          |       |          |       |                        |
|----------|--------|-------|------|----------|-------|----------|-------|------------------------|
| TAAGCAC  | db/db2 | db/db | 8861 | 0.027758 | FALSE | 0.670649 | FALSE | Photoreceptor          |
| TAAGCCA  | db/db2 | db/db | 7303 | 0.057037 | FALSE | 0.92996  | FALSE | Photoreceptor          |
| TAAGCCA  | db/db2 | db/db | 837  | 0.011561 | FALSE | 1.62067  | FALSE | Endothelia EC-C4       |
| TAAGCCA  | db/db2 | db/db | 2535 | 0.053718 | FALSE | 1.713633 | FALSE | Photoreceptor          |
| TAAGCCA  | db/db2 | db/db | 931  | 0.14163  | TRUE  | 3.749383 | FALSE |                        |
| TAAGCCA  | db/db2 | db/db | 808  | 0.063221 | FALSE | 3.564132 | FALSE | Photoreceptor          |
| TAAGCCAT | db/db2 | db/db | 5656 | 0.032546 | FALSE | 0.92349  | FALSE | Endothelia Venous EC   |
| TAAGCGT  | db/db2 | db/db | 2395 | 0.030318 | FALSE | 1.013052 | FALSE | Endothelia Capillary E |
| TAAGCGT  | db/db2 | db/db | 531  | 0.020536 | FALSE | 2.881647 | FALSE | Pericyte               |
| TAAGCGT  | db/db2 | db/db | 1065 | 0.037564 | FALSE | 1.895997 | FALSE | Photoreceptor          |
| TAAGCGT  | db/db2 | db/db | 1240 | 0.018422 | FALSE | 1.105656 | FALSE | Endothelia Capillary E |
| TAAGTCG  | db/db2 | db/db | 4628 | 0.022059 | FALSE | 1.204301 | FALSE | Photoreceptor          |
| TAAGTCG  | db/db2 | db/db | 3141 | 0.008438 | FALSE | 0.85183  | FALSE | Endothelia Venous EC   |
| TAAGTCG  | db/db2 | db/db | 7419 | 0.084562 | FALSE | 0.887811 | FALSE | Photoreceptor          |
| TAATCTCA | db/db2 | db/db | 2277 | 0.008032 | FALSE | 1.509191 | FALSE | Photoreceptor          |
| TAATCTCT | db/db2 | db/db | 922  | 0.164835 | TRUE  | 13.84146 | TRUE  |                        |
| TAATTCCA | db/db2 | db/db | 1392 | 0.024534 | FALSE | 1.670426 | FALSE | Endothelia Capillary E |
| TAATTCCA | db/db2 | db/db | 1218 | 0.058205 | FALSE | 1.820809 | FALSE | Endothelia Capillary E |
| TAATTCCA | db/db2 | db/db | 4183 | 0.029266 | FALSE | 0.940662 | FALSE | Photoreceptor          |
| TAATTCCA | db/db2 | db/db | 7890 | 0.184701 | TRUE  | 1.533718 | FALSE |                        |
| TAATTCCT | db/db2 | db/db | 6283 | 0.009933 | FALSE | 0.907013 | FALSE | Endothelia EC-C4       |
| TAATTCCT | db/db2 | db/db | 1146 | 0.037564 | FALSE | 0.746694 | FALSE | Photoreceptor          |
| TAATTCCT | db/db2 | db/db | 428  | 0.026796 | FALSE | 46.35272 | TRUE  |                        |
| TACAACG  | db/db2 | db/db | 1031 | 0.016488 | FALSE | 1.68119  | FALSE | Endothelia Capillary E |
| TACAACG  | db/db2 | db/db | 4261 | 0.022857 | FALSE | 1.206942 | FALSE | Endothelia Venous EC   |
| TACACCCC | db/db2 | db/db | 2034 | 0.017434 | FALSE | 0.407497 | FALSE | Photoreceptor          |
| TACACCCC | db/db2 | db/db | 1881 | 0.021286 | FALSE | 1.192263 | FALSE | Photoreceptor          |
| TACACCCT | db/db2 | db/db | 416  | 0.036891 | FALSE | 46.22641 | TRUE  |                        |
| TACACCCT | db/db2 | db/db | 1084 | 0.076994 | FALSE | 3.377603 | FALSE | Muller cell            |
| TACACCCT | db/db2 | db/db | 438  | 0.021286 | FALSE | 2.279364 | FALSE | Photoreceptor          |
| TACACCCT | db/db2 | db/db | 3871 | 0.009277 | FALSE | 0.939232 | FALSE | Endothelia Venous EC   |
| TACAGGT  | db/db2 | db/db | 838  | 0.034954 | FALSE | 1.304157 | FALSE | Photoreceptor          |
| TACAGGT  | db/db2 | db/db | 2418 | 0.091004 | FALSE | 1.384376 | FALSE | Endothelia Venous EC   |
| TACAGGT  | db/db2 | db/db | 1007 | 0.075259 | FALSE | 2.628062 | FALSE | Muller cell            |
| TACAGGT  | db/db2 | db/db | 856  | 0.046906 | FALSE | 2.983783 | FALSE | Endothelia Capillary E |
| TACAGGT  | db/db2 | db/db | 4561 | 0.025868 | FALSE | 1.041862 | FALSE | Endothelia EC-C4       |
| TACATTCA | db/db2 | db/db | 691  | 0.058205 | FALSE | 39.66022 | TRUE  |                        |
| TACATTCA | db/db2 | db/db | 830  | 0.036232 | FALSE | 2.648014 | FALSE | Endothelia Capillary E |
| TACATTCA | db/db2 | db/db | 3268 | 0.028754 | FALSE | 0.859642 | FALSE | Photoreceptor          |
| TACATTCC | db/db2 | db/db | 6680 | 0.028251 | FALSE | 0.768712 | FALSE | Photoreceptor          |
| TACATTCC | db/db2 | db/db | 1152 | 0.080645 | FALSE | 3.453295 | FALSE | Muller cell            |
| TACATTCC | db/db2 | db/db | 1666 | 0.041154 | FALSE | 1.696557 | FALSE | Photoreceptor          |
| TACATTCT | db/db2 | db/db | 9853 | 0.022059 | FALSE | 0.775799 | FALSE | Photoreceptor          |
| TACCCACC | db/db2 | db/db | 308  | 0.045165 | FALSE | 52.86625 | TRUE  |                        |
| TACCCACC | db/db2 | db/db | 604  | 0.052669 | FALSE | 2.828595 | FALSE | Photoreceptor          |
| TACCCGTA | db/db2 | db/db | 1383 | 0.011561 | FALSE | 1.612936 | FALSE | Endothelia EC-C4       |
| TACCCGTA | db/db2 | db/db | 6043 | 0.067388 | FALSE | 1.75183  | FALSE | Neuron                 |

|                 |       |       |          |       |          |       |                        |
|-----------------|-------|-------|----------|-------|----------|-------|------------------------|
| TACCCGTC db/db2 | db/db | 1048  | 0.030318 | FALSE | 3.631646 | FALSE | Muller cell            |
| TACCCGTC db/db2 | db/db | 1026  | 0.080645 | FALSE | 7.783312 | TRUE  |                        |
| TACCCGTC db/db2 | db/db | 2947  | 0.030318 | FALSE | 0.931534 | FALSE | Endothelia Capillary E |
| TACCCGTC db/db2 | db/db | 2797  | 0.053718 | FALSE | 1.09187  | FALSE | Endothelia EC-C4       |
| TACCGAA db/db2  | db/db | 2501  | 0.013605 | FALSE | 0.301657 | FALSE | Photoreceptor          |
| TACCGAAC db/db2 | db/db | 1098  | 0.028251 | FALSE | 1.261041 | FALSE | Endothelia Capillary E |
| TACCGGG db/db2  | db/db | 816   | 0.020171 | FALSE | 1.332512 | FALSE | Photoreceptor          |
| TACCGGG db/db2  | db/db | 683   | 0.055901 | FALSE | 1.048765 | FALSE | Photoreceptor          |
| TACCTCGA db/db2 | db/db | 1226  | 0.010614 | FALSE | 1.674703 | FALSE | Pericyte               |
| TACCTCGA db/db2 | db/db | 2717  | 0.029787 | FALSE | 1.041957 | FALSE | Endothelia EC-C4       |
| TACCTCGC db/db2 | db/db | 4447  | 0.018422 | FALSE | 1.037948 | FALSE | Endothelia Capillary E |
| TACCTCGC db/db2 | db/db | 3805  | 0.053718 | FALSE | 1.259273 | FALSE | Photoreceptor          |
| TACCTCGC db/db2 | db/db | 7871  | 0.046025 | FALSE | 0.926894 | FALSE | Photoreceptor          |
| TACCTCGC db/db2 | db/db | 2605  | 0.038251 | FALSE | 1.691093 | FALSE | Neuron                 |
| TACCTCGC db/db2 | db/db | 4304  | 0.024534 | FALSE | 0.827537 | FALSE | Photoreceptor          |
| TACCTGCA db/db2 | db/db | 4082  | 0.023266 | FALSE | 1.05599  | FALSE | Endothelia Venous EC   |
| TACCTGCC db/db2 | db/db | 9236  | 0.028251 | FALSE | 0.756885 | FALSE | Photoreceptor          |
| TACGCTCA db/db2 | db/db | 454   | 0.020536 | FALSE | 0.631048 | FALSE | Photoreceptor          |
| TACGCTCC db/db2 | db/db | 2338  | 0.028754 | FALSE | 1.303178 | FALSE | Photoreceptor          |
| TACGCTCC db/db2 | db/db | 1085  | 0.076994 | FALSE | 1.572165 | FALSE | Photoreceptor          |
| TACGGGC db/db2  | db/db | 477   | 0.098234 | FALSE | 4.267625 | FALSE | Muller cell            |
| TACGGGC db/db2  | db/db | 6036  | 0.055901 | FALSE | 1.136112 | FALSE | Photoreceptor          |
| TACGGGC db/db2  | db/db | 1816  | 0.046906 | FALSE | 0.919148 | FALSE | Photoreceptor          |
| TACGGGC db/db2  | db/db | 476   | 0.031973 | FALSE | 37.24007 | TRUE  |                        |
| TACGGGC db/db2  | db/db | 3370  | 0.025416 | FALSE | 1.011263 | FALSE | Endothelia EC-C4       |
| TACGGTA db/db2  | db/db | 3543  | 0.03313  | FALSE | 0.862844 | FALSE | Photoreceptor          |
| TACGGTA db/db2  | db/db | 398   | 0.046906 | FALSE | 36.37427 | TRUE  |                        |
| TACGGTAC db/db2 | db/db | 2437  | 0.009277 | FALSE | 0.296771 | FALSE | Photoreceptor          |
| TACGGTAC db/db2 | db/db | 2855  | 0.024971 | FALSE | 1.101344 | FALSE | Endothelia Venous EC   |
| TACGGTAC db/db2 | db/db | 3018  | 0.107669 | TRUE  | 2.588901 | FALSE |                        |
| TACGGTAT db/db2 | db/db | 5217  | 0.023266 | FALSE | 0.973004 | FALSE | Endothelia Capillary E |
| TACGTCCG db/db2 | db/db | 5761  | 0.023266 | FALSE | 0.791904 | FALSE | Photoreceptor          |
| TACTGCCA db/db2 | db/db | 812   | 0.043505 | FALSE | 1.961531 | FALSE | Microglia              |
| TACTGCCC db/db2 | db/db | 461   | 0.033726 | FALSE | 4.908009 | FALSE | Muller cell            |
| TACTGCCC db/db2 | db/db | 498   | 0.119124 | TRUE  | 3.034901 | FALSE |                        |
| TACTGCCC db/db2 | db/db | 4702  | 0.022857 | FALSE | 0.96864  | FALSE | Endothelia Venous EC   |
| TACTGCCC db/db2 | db/db | 2823  | 0.013338 | FALSE | 1.309063 | FALSE | Endothelia Venous EC   |
| TACTTACC db/db2 | db/db | 398   | 0.045165 | FALSE | 1.266809 | FALSE | Photoreceptor          |
| TACTTACC db/db2 | db/db | 10249 | 0.036891 | FALSE | 0.577523 | FALSE | Photoreceptor          |
| TACTTACG db/db2 | db/db | 521   | 0.039671 | FALSE | 34.9892  | TRUE  |                        |
| TACTTACG db/db2 | db/db | 4467  | 0.027273 | FALSE | 1.073564 | FALSE | Photoreceptor          |
| TACTTACT db/db2 | db/db | 1489  | 0.012052 | FALSE | 0.723468 | FALSE | Photoreceptor          |
| TACTTCAA db/db2 | db/db | 5161  | 0.011805 | FALSE | 0.678083 | FALSE | Photoreceptor          |
| TACTTCAA db/db2 | db/db | 783   | 0.008032 | FALSE | 1.968117 | FALSE | Pericyte               |
| TACTTCAA db/db2 | db/db | 6214  | 0.029266 | FALSE | 1.041616 | FALSE | Photoreceptor          |
| TACTTCAC db/db2 | db/db | 587   | 0.057037 | FALSE | 1.212626 | FALSE | Photoreceptor          |
| TACTTCAT db/db2 | db/db | 2800  | 0.059406 | FALSE | 0.769923 | FALSE | Photoreceptor          |

|                 |       |      |          |       |          |       |                        |
|-----------------|-------|------|----------|-------|----------|-------|------------------------|
| TACTTGTA db/db2 | db/db | 569  | 0.021286 | FALSE | 3.483219 | FALSE | Muller cell            |
| TACTTGTT db/db2 | db/db | 359  | 0.071958 | FALSE | 17.65835 | TRUE  |                        |
| TACTTGTT db/db2 | db/db | 766  | 0.015581 | FALSE | 0.116647 | FALSE | Photoreceptor          |
| TAGACCA db/db2  | db/db | 470  | 0.053718 | FALSE | 17.83355 | TRUE  |                        |
| TAGACCAC db/db2 | db/db | 402  | 0.031973 | FALSE | 4.153145 | FALSE | Photoreceptor          |
| TAGACCAC db/db2 | db/db | 1826 | 0.082569 | FALSE | 1.505051 | FALSE | Photoreceptor          |
| TAGACCAT db/db2 | db/db | 3042 | 0.014151 | FALSE | 1.402724 | FALSE | Endothelia Venous EC   |
| TAGACCAT db/db2 | db/db | 2501 | 0.058205 | FALSE | 1.670534 | FALSE | Endothelia Venous EC   |
| TAGACTG db/db2  | db/db | 677  | 0.075259 | FALSE | 3.87295  | FALSE | Muller cell            |
| TAGACTG db/db2  | db/db | 477  | 0.184701 | TRUE  | 16.35688 | TRUE  |                        |
| TAGACTGC db/db2 | db/db | 333  | 0.035586 | FALSE | 36.21212 | TRUE  |                        |
| TAGAGTCC db/db2 | db/db | 656  | 0.012303 | FALSE | 0.550844 | FALSE | Photoreceptor          |
| TAGAGTCC db/db2 | db/db | 1743 | 0.016799 | FALSE | 0.93197  | FALSE | Endothelia Capillary E |
| TAGAGTCC db/db2 | db/db | 1001 | 0.023682 | FALSE | 1.030968 | FALSE | Photoreceptor          |
| TAGAGTCC db/db2 | db/db | 4074 | 0.048732 | FALSE | 0.717236 | FALSE | Photoreceptor          |
| TAGAGTCC db/db2 | db/db | 1002 | 0.009493 | FALSE | 1.438254 | FALSE | Endothelia Capillary E |
| TAGAGTCT db/db2 | db/db | 1264 | 0.088776 | FALSE | 7.497415 | TRUE  |                        |
| TAGATCG db/db2  | db/db | 824  | 0.021669 | FALSE | 1.818179 | FALSE | Endothelia Capillary E |
| TAGATCG db/db2  | db/db | 2923 | 0.004275 | FALSE | 1.529394 | FALSE | Neuron                 |
| TAGATCG db/db2  | db/db | 4060 | 0.023266 | FALSE | 0.982868 | FALSE | Endothelia EC-C4       |
| TAGATCG db/db2  | db/db | 842  | 0.036232 | FALSE | 3.502606 | FALSE | Muller cell            |
| TAGATCGT db/db2 | db/db | 392  | 0.026328 | FALSE | 3.147758 | FALSE | Photoreceptor          |
| TAGATCGT db/db2 | db/db | 1185 | 0.024534 | FALSE | 1.112889 | FALSE | Photoreceptor          |
| TAGCACA db/db2  | db/db | 7371 | 0.01981  | FALSE | 0.912077 | FALSE | Photoreceptor          |
| TAGCACA db/db2  | db/db | 8316 | 0.014151 | FALSE | 0.732781 | FALSE | Photoreceptor          |
| TAGCACA db/db2  | db/db | 417  | 0.052669 | FALSE | 16.01307 | TRUE  |                        |
| TAGCACAC db/db2 | db/db | 3401 | 0.049679 | FALSE | 1.271566 | FALSE | Endothelia Venous EC   |
| TAGGAGG db/db2  | db/db | 1024 | 0.091004 | FALSE | 4.5446   | FALSE | Muller cell            |
| TAGGAGG db/db2  | db/db | 307  | 0.052669 | FALSE | 19.32515 | TRUE  |                        |
| TAGGAGG db/db2  | db/db | 1270 | 0.08663  | FALSE | 2.198895 | FALSE | Muller cell            |
| TAGGGTT db/db2  | db/db | 3177 | 0.013338 | FALSE | 1.243251 | FALSE | Endothelia Aterial EC  |
| TAGGGTT db/db2  | db/db | 1982 | 0.013074 | FALSE | 3.510243 | FALSE | Muller cell            |
| TAGGGTT db/db2  | db/db | 432  | 0.026796 | FALSE | 2.093301 | FALSE | Endothelia Capillary E |
| TAGGGTT db/db2  | db/db | 433  | 0.054795 | FALSE | 30.09321 | TRUE  |                        |
| TAGGGTT db/db2  | db/db | 3608 | 0.015581 | FALSE | 0.808277 | FALSE | Photoreceptor          |
| TAGGGTT db/db2  | db/db | 1504 | 0.03313  | FALSE | 0.566742 | FALSE | Photoreceptor          |
| TAGGTAC db/db2  | db/db | 6285 | 0.055901 | FALSE | 0.996573 | FALSE | Endothelia Venous EC   |
| TAGGTAC db/db2  | db/db | 639  | 0.012557 | FALSE | 2.091621 | FALSE | Muller cell            |
| TAGGTAC db/db2  | db/db | 694  | 0.051646 | FALSE | 2.471741 | FALSE | Pericyte               |
| TAGGTAC db/db2  | db/db | 961  | 0.032546 | FALSE | 1.540956 | FALSE | Photoreceptor          |
| TAGGTACT db/db2 | db/db | 7526 | 0.04192  | FALSE | 0.972895 | FALSE | Photoreceptor          |
| TAGGTTG db/db2  | db/db | 4455 | 0.112477 | TRUE  | 5.312185 | TRUE  |                        |
| TAGGTTG db/db2  | db/db | 4644 | 0.031411 | FALSE | 1.113863 | FALSE | Photoreceptor          |
| TAGGTTG db/db2  | db/db | 1910 | 0.067388 | FALSE | 0.971445 | FALSE | Photoreceptor          |
| TAGGTTG db/db2  | db/db | 1172 | 0.009277 | FALSE | 1.870234 | FALSE | Pericyte               |
| TAGGTTG db/db2  | db/db | 906  | 0.022857 | FALSE | 3.395095 | FALSE | Muller cell            |
| TAGGTTG db/db2  | db/db | 546  | 0.059406 | FALSE | 4.23033  | FALSE | Muller cell            |

|                  |       |      |          |       |          |       |                        |
|------------------|-------|------|----------|-------|----------|-------|------------------------|
| TAGGTTG1 db/db2  | db/db | 859  | 0.084562 | FALSE | 2.231826 | FALSE | Endothelia Capillary E |
| TAGGTTG1 db/db2  | db/db | 2721 | 0.005958 | FALSE | 1.376906 | FALSE | Neuron                 |
| TAGTGCA/ db/db2  | db/db | 7324 | 0.095727 | FALSE | 0.759077 | FALSE | Photoreceptor          |
| TAGTGCA/ db/db2  | db/db | 402  | 0.016181 | FALSE | 2.809554 | FALSE | Photoreceptor          |
| TAGTGCA( db/db2  | db/db | 2331 | 0.043505 | FALSE | 1.755306 | FALSE | Photoreceptor          |
| TAGTGCA( db/db2  | db/db | 2569 | 0.017758 | FALSE | 1.001076 | FALSE | Endothelia EC-C4       |
| TAGTGCA( db/db2  | db/db | 4430 | 0.036232 | FALSE | 1.06857  | FALSE | Endothelia Capillary E |
| TAGTGCA1 db/db2  | db/db | 1641 | 0.060641 | FALSE | 1.567925 | FALSE | Photoreceptor          |
| TATACCTA db/db2  | db/db | 1114 | 0.03313  | FALSE | 0.396231 | FALSE | Photoreceptor          |
| TATACCT1 db/db2  | db/db | 3377 | 0.046025 | FALSE | 1.022509 | FALSE | Endothelia Venous EC   |
| TATATCCA db/db2  | db/db | 5528 | 0.034954 | FALSE | 0.990699 | FALSE | Photoreceptor          |
| TATATCCA db/db2  | db/db | 7751 | 0.218615 | TRUE  | 2.539334 | FALSE |                        |
| TATATCCC db/db2  | db/db | 335  | 0.03313  | FALSE | 27.10952 | TRUE  |                        |
| TATATCCC db/db2  | db/db | 1347 | 0.03313  | FALSE | 0.893778 | FALSE | Photoreceptor          |
| TATATCCC db/db2  | db/db | 7071 | 0.058205 | FALSE | 0.851819 | FALSE | Photoreceptor          |
| TATATCCG db/db2  | db/db | 3347 | 0.042704 | FALSE | 0.73112  | FALSE | Photoreceptor          |
| TATATCCT1 db/db2 | db/db | 5059 | 0.027273 | FALSE | 0.898179 | FALSE | Endothelia EC-C4       |
| TATCAGG/ db/db2  | db/db | 2471 | 0.013876 | FALSE | 1.272536 | FALSE | Photoreceptor          |
| TATCCTAC db/db2  | db/db | 913  | 0.068864 | FALSE | 2.54547  | FALSE | Endothelia Capillary E |
| TATCCTAC db/db2  | db/db | 383  | 0.055901 | FALSE | 6.981132 | TRUE  |                        |
| TATCGCCA db/db2  | db/db | 415  | 0.036232 | FALSE | 4.313696 | FALSE | Endothelia Capillary E |
| TATCGCCT db/db2  | db/db | 1217 | 0.100845 | TRUE  | 16.08877 | TRUE  |                        |
| TATCTGTA db/db2  | db/db | 537  | 0.033726 | FALSE | 3.592363 | FALSE | Photoreceptor          |
| TATCTGTT1 db/db2 | db/db | 2111 | 0.024105 | FALSE | 1.735008 | FALSE | Endothelia Capillary E |
| TATCTGTT1 db/db2 | db/db | 6504 | 0.031411 | FALSE | 0.749316 | FALSE | Endothelia EC-C4       |
| TATCTGTT1 db/db2 | db/db | 524  | 0.028251 | FALSE | 3.196103 | FALSE | Muller cell            |
| TATCTTGA db/db2  | db/db | 4584 | 0.017758 | FALSE | 0.882022 | FALSE | Photoreceptor          |
| TATCTTGA db/db2  | db/db | 3382 | 0.106408 | TRUE  | 5.895412 | TRUE  |                        |
| TATCTTGA db/db2  | db/db | 687  | 0.078788 | FALSE | 47.06609 | TRUE  |                        |
| TATCTTGC db/db2  | db/db | 3484 | 0.070386 | FALSE | 1.190379 | FALSE | Photoreceptor          |
| TATGTTCA db/db2  | db/db | 750  | 0.003497 | FALSE | 1.972764 | FALSE | Endothelia Capillary E |
| TATGTTCA db/db2  | db/db | 5205 | 0.022455 | FALSE | 0.979806 | FALSE | Endothelia Venous EC   |
| TATGTTCA db/db2  | db/db | 1954 | 0.038251 | FALSE | 0.567977 | FALSE | Photoreceptor          |
| TATGTTCG db/db2  | db/db | 485  | 0.022857 | FALSE | 3.250759 | FALSE | Photoreceptor          |
| TATGTTCT1 db/db2 | db/db | 507  | 0.012052 | FALSE | 0        | FALSE | Photoreceptor          |
| TATGTTCT1 db/db2 | db/db | 621  | 0.009933 | FALSE | 3.064574 | FALSE | Pericyte               |
| TATTCCAC db/db2  | db/db | 7042 | 0.200401 | TRUE  | 2.627389 | FALSE |                        |
| TATTCCAC db/db2  | db/db | 541  | 0.036232 | FALSE | 3.376143 | FALSE | Muller cell            |
| TATTGCTC db/db2  | db/db | 7233 | 0.029787 | FALSE | 0.817236 | FALSE | Endothelia EC-C4       |
| TATTGCTG db/db2  | db/db | 2718 | 0.029787 | FALSE | 1.759639 | FALSE | Pericyte               |
| TATTGCTG db/db2  | db/db | 3255 | 0.004116 | FALSE | 1.072839 | FALSE | Neuron                 |
| TATTGGG( db/db2  | db/db | 2235 | 0.084562 | FALSE | 5.99295  | TRUE  |                        |
| TATTTCGC db/db2  | db/db | 684  | 0.070386 | FALSE | 17.32082 | TRUE  |                        |
| TATTTCGG db/db2  | db/db | 1351 | 0.08663  | FALSE | 2.761982 | FALSE | Muller cell            |
| TATTTCGG db/db2  | db/db | 5167 | 0.057037 | FALSE | 1.114383 | FALSE | Photoreceptor          |
| TATTTCGT1 db/db2 | db/db | 3626 | 0.036232 | FALSE | 0.83964  | FALSE | Photoreceptor          |
| TCAAGACT db/db2  | db/db | 2340 | 0.010846 | FALSE | 0.940921 | FALSE | Endothelia Aterial EC  |

|                 |       |      |          |       |          |       |                        |
|-----------------|-------|------|----------|-------|----------|-------|------------------------|
| TCAAGACT db/db2 | db/db | 5831 | 0.019455 | FALSE | 1.03558  | FALSE | Endothelia Venous EC   |
| TCAAGCA db/db2  | db/db | 816  | 0.075259 | FALSE | 2.100043 | FALSE | Endothelia Capillary E |
| TCAAGCA db/db2  | db/db | 582  | 0.039671 | FALSE | 43.35938 | TRUE  |                        |
| TCAAGCA db/db2  | db/db | 5266 | 0.028251 | FALSE | 1.026325 | FALSE | Endothelia Venous EC   |
| TCAAGCA db/db2  | db/db | 631  | 0.014151 | FALSE | 2.60428  | FALSE | Muller cell            |
| TCAAGCAT db/db2 | db/db | 1091 | 0.080645 | FALSE | 3.198293 | FALSE | Muller cell            |
| TCAAGCAT db/db2 | db/db | 2274 | 0.047807 | FALSE | 1.501613 | FALSE | Neuron                 |
| TCAAGTG db/db2  | db/db | 5104 | 0.021669 | FALSE | 1.242085 | FALSE | Photoreceptor          |
| TCAAGTG db/db2  | db/db | 2062 | 0.045165 | FALSE | 1.925777 | FALSE | Photoreceptor          |
| TCAATCTA db/db2 | db/db | 3810 | 0.015581 | FALSE | 0.952479 | FALSE | Endothelia Venous EC   |
| TCAATCTC db/db2 | db/db | 1089 | 0.011081 | FALSE | 1.470343 | FALSE | Endothelia Capillary E |
| TCAATCTG db/db2 | db/db | 1088 | 0.046906 | FALSE | 0.786599 | FALSE | Photoreceptor          |
| TCAATCTG db/db2 | db/db | 9873 | 0.017758 | FALSE | 0.555551 | FALSE | Photoreceptor          |
| TCAATCTG db/db2 | db/db | 898  | 0.057037 | FALSE | 2.180694 | FALSE | Photoreceptor          |
| TCAATCTG db/db2 | db/db | 4281 | 0.035586 | FALSE | 1.13327  | FALSE | Endothelia Venous EC   |
| TCAATCTG db/db2 | db/db | 7050 | 0.018761 | FALSE | 0.536979 | FALSE | Photoreceptor          |
| TCAATTCA db/db2 | db/db | 7229 | 0.314286 | TRUE  | 1.347544 | FALSE |                        |
| TCAATTCA db/db2 | db/db | 498  | 0.044326 | FALSE | 2.040255 | FALSE | Endothelia Capillary E |
| TCAATTCA db/db2 | db/db | 4536 | 0.012557 | FALSE | 0.877612 | FALSE | Endothelia EC-C4       |
| TCAATTCC db/db2 | db/db | 525  | 0.028251 | FALSE | 3.731359 | FALSE | Endothelia Capillary E |
| TCAATTCC db/db2 | db/db | 3502 | 0.010614 | FALSE | 1.016653 | FALSE | Endothelia Venous EC   |
| TCAATTCT db/db2 | db/db | 3568 | 0.022857 | FALSE | 0.897025 | FALSE | Photoreceptor          |
| TCACAAG db/db2  | db/db | 4325 | 0.119124 | TRUE  | 8.215828 | TRUE  |                        |
| TCACAAG db/db2  | db/db | 826  | 0.119124 | TRUE  | 17.91578 | TRUE  |                        |
| TCACAAG db/db2  | db/db | 346  | 0.115723 | TRUE  | 6.916996 | TRUE  |                        |
| TCACATTA db/db2 | db/db | 9247 | 0.014429 | FALSE | 0.683097 | FALSE | Photoreceptor          |
| TCACGCTC db/db2 | db/db | 4187 | 0.014429 | FALSE | 1.062298 | FALSE | Endothelia Venous EC   |
| TCACGCTT db/db2 | db/db | 2547 | 0.101906 | TRUE  | 1.698398 | FALSE |                        |
| TCACGGG db/db2  | db/db | 2455 | 0.020536 | FALSE | 1.544941 | FALSE | Endothelia Capillary E |
| TCACTCGA db/db2 | db/db | 489  | 0.027758 | FALSE | 4.74164  | FALSE | Muller cell            |
| TCACTCGA db/db2 | db/db | 5535 | 0.048732 | FALSE | 1.079263 | FALSE | Photoreceptor          |
| TCACTCGC db/db2 | db/db | 8445 | 0.020536 | FALSE | 0.816267 | FALSE | Photoreceptor          |
| TCACTCGT db/db2 | db/db | 872  | 0.028251 | FALSE | 2.768491 | FALSE | Muller cell            |
| TCACTCGT db/db2 | db/db | 4718 | 0.037564 | FALSE | 0.760236 | FALSE | Endothelia EC-C4       |
| TCAGCAA db/db2  | db/db | 2162 | 0.013605 | FALSE | 1.117103 | FALSE | Endothelia EC-C4       |
| TCAGCAAC db/db2 | db/db | 2578 | 0.011561 | FALSE | 1.348173 | FALSE | Endothelia EC-C4       |
| TCAGCAAC db/db2 | db/db | 2844 | 0.025868 | FALSE | 0.945211 | FALSE | Endothelia EC-C4       |
| TCAGCAAT db/db2 | db/db | 2080 | 0.057037 | FALSE | 2.452821 | FALSE | Muller cell            |
| TCAGCCTA db/db2 | db/db | 510  | 0.039671 | FALSE | 4.288292 | FALSE | Muller cell            |
| TCAGCCTC db/db2 | db/db | 1286 | 0.030318 | FALSE | 0.470475 | FALSE | Photoreceptor          |
| TCAGCCTC db/db2 | db/db | 420  | 0.061912 | FALSE | 35.73113 | TRUE  |                        |
| TCAGCCTC db/db2 | db/db | 2986 | 0.057037 | FALSE | 1.202945 | FALSE | Photoreceptor          |
| TCAGCCTC db/db2 | db/db | 1214 | 0.093319 | FALSE | 2.930095 | FALSE | Muller cell            |
| TCAGCCTT db/db2 | db/db | 3906 | 0.014711 | FALSE | 0.887909 | FALSE | Photoreceptor          |
| TCAGCCTT db/db2 | db/db | 3236 | 0.011319 | FALSE | 0.155361 | FALSE | Photoreceptor          |
| TCAGGGC db/db2  | db/db | 1138 | 0.020908 | FALSE | 1.108263 | FALSE | Photoreceptor          |
| TCAGGGC db/db2  | db/db | 4624 | 0.034954 | FALSE | 1.117501 | FALSE | Photoreceptor          |

|          |        |       |      |          |       |          |       |                         |
|----------|--------|-------|------|----------|-------|----------|-------|-------------------------|
| TCAGGGC  | db/db2 | db/db | 4278 | 0.084562 | FALSE | 1.128728 | FALSE | Photoreceptor           |
| TCAGGGC  | db/db2 | db/db | 1276 | 0.033726 | FALSE | 1.706404 | FALSE | Muller cell             |
| TCAGGTAC | db/db2 | db/db | 5955 | 0.020171 | FALSE | 0.925314 | FALSE | Endothelia EC-C4        |
| TCAGGTAC | db/db2 | db/db | 8804 | 0.025416 | FALSE | 0.718799 | FALSE | Photoreceptor           |
| TCAGGTAC | db/db2 | db/db | 1539 | 0.041154 | FALSE | 1.533498 | FALSE | Photoreceptor           |
| TCAGGTAC | db/db2 | db/db | 1146 | 0.014997 | FALSE | 2.376972 | FALSE | Neuron                  |
| TCAGGTAT | db/db2 | db/db | 6505 | 0.038953 | FALSE | 0.62767  | FALSE | Photoreceptor           |
| TCAGGTAT | db/db2 | db/db | 2737 | 0.023266 | FALSE | 1.198147 | FALSE | Endothelia Venous EC    |
| TCAGTCCA | db/db2 | db/db | 458  | 0.008852 | FALSE | 3.024403 | FALSE | Muller cell             |
| TCAGTCCC | db/db2 | db/db | 442  | 0.064568 | FALSE | 1.741044 | FALSE | Photoreceptor           |
| TCAGTCCT | db/db2 | db/db | 2959 | 0.052669 | FALSE | 9.994691 | TRUE  |                         |
| TCAGTCCT | db/db2 | db/db | 748  | 0.05065  | FALSE | 37.0144  | TRUE  |                         |
| TCAGTGA  | db/db2 | db/db | 2385 | 0.027273 | FALSE | 0.870427 | FALSE | Photoreceptor           |
| TCAGTGA  | db/db2 | db/db | 3503 | 0.068864 | FALSE | 1.497857 | FALSE | Photoreceptor           |
| TCAGTGAT | db/db2 | db/db | 593  | 0.024534 | FALSE | 2.136721 | FALSE | Photoreceptor           |
| TCAGTTTA | db/db2 | db/db | 9045 | 0.159016 | TRUE  | 2.459539 | FALSE |                         |
| TCAGTTTA | db/db2 | db/db | 3226 | 0.037564 | FALSE | 1.154722 | FALSE | Pericyte                |
| TCAGTTTC | db/db2 | db/db | 4707 | 0.059406 | FALSE | 1.102597 | FALSE | Endothelia Venous EC    |
| TCAGTTTC | db/db2 | db/db | 388  | 0.045165 | FALSE | 3.748634 | FALSE | Endothelia Capillary EC |
| TCAGTTTG | db/db2 | db/db | 1124 | 0.037564 | FALSE | 1.118282 | FALSE | Photoreceptor           |
| TCAGTTTG | db/db2 | db/db | 1832 | 0.021669 | FALSE | 0.241136 | FALSE | Photoreceptor           |
| TCATACTA | db/db2 | db/db | 7540 | 0.031973 | FALSE | 0.867493 | FALSE | Photoreceptor           |
| TCATACTA | db/db2 | db/db | 2375 | 0.018761 | FALSE | 1.085757 | FALSE | Endothelia Capillary EC |
| TCATACTA | db/db2 | db/db | 8115 | 0.061912 | FALSE | 0.877561 | FALSE | Photoreceptor           |
| TCATACTA | db/db2 | db/db | 1880 | 0.040404 | FALSE | 2.731359 | FALSE | Muller cell             |
| TCATACTA | db/db2 | db/db | 3642 | 0.013074 | FALSE | 1.03043  | FALSE | Endothelia Capillary EC |
| TCATACTA | db/db2 | db/db | 1556 | 0.038953 | FALSE | 3.446957 | FALSE | Muller cell             |
| TCATATCA | db/db2 | db/db | 8365 | 0.018422 | FALSE | 0.718436 | FALSE | Photoreceptor           |
| TCATATCC | db/db2 | db/db | 2663 | 0.025868 | FALSE | 0.727602 | FALSE | Photoreceptor           |
| TCATATCG | db/db2 | db/db | 1097 | 0.043505 | FALSE | 2.110085 | FALSE | Photoreceptor           |
| TCATATCG | db/db2 | db/db | 8504 | 0.016488 | FALSE | 0.725306 | FALSE | Photoreceptor           |
| TCATATCT | db/db2 | db/db | 755  | 0.019106 | FALSE | 0.636844 | FALSE | Pericyte                |
| TCATCATA | db/db2 | db/db | 1589 | 0.047807 | FALSE | 2.255936 | FALSE | Photoreceptor           |
| TCATCATG | db/db2 | db/db | 5485 | 0.014151 | FALSE | 0.779416 | FALSE | Photoreceptor           |
| TCATCCGA | db/db2 | db/db | 1985 | 0.067388 | FALSE | 1.283926 | FALSE | Photoreceptor           |
| TCATCCGC | db/db2 | db/db | 1769 | 0.076994 | FALSE | 2.231908 | FALSE | Photoreceptor           |
| TCATCCGC | db/db2 | db/db | 533  | 0.018422 | FALSE | 0.81394  | FALSE | Neuron                  |
| TCATCCGC | db/db2 | db/db | 1171 | 0.093319 | FALSE | 2.633828 | FALSE | Photoreceptor           |
| TCATCCGT | db/db2 | db/db | 520  | 0.048732 | FALSE | 2.291406 | FALSE | Endothelia Capillary EC |
| TCATCCGT | db/db2 | db/db | 977  | 0.024534 | FALSE | 2.02619  | FALSE | Endothelia Capillary EC |
| TCATCCGT | db/db2 | db/db | 1584 | 0.011805 | FALSE | 0.428054 | FALSE | Photoreceptor           |
| TCATGAG  | db/db2 | db/db | 1442 | 0.057037 | FALSE | 1.773943 | FALSE | Endothelia Capillary EC |
| TCATGAG  | db/db2 | db/db | 1931 | 0.047807 | FALSE | 1.199516 | FALSE | Endothelia Capillary EC |
| TCATGAG  | db/db2 | db/db | 7319 | 0.017434 | FALSE | 0.260652 | FALSE | Photoreceptor           |
| TCATGAG  | db/db2 | db/db | 4115 | 0.022059 | FALSE | 1.337145 | FALSE | Photoreceptor           |
| TCATGAG  | db/db2 | db/db | 5581 | 0.028754 | FALSE | 0.963115 | FALSE | Endothelia EC-C4        |
| TCATGAGT | db/db2 | db/db | 858  | 0.042704 | FALSE | 1.331329 | FALSE | Photoreceptor           |

|                 |       |       |          |       |          |       |                        |
|-----------------|-------|-------|----------|-------|----------|-------|------------------------|
| TCATGCCA db/db2 | db/db | 1697  | 0.010614 | FALSE | 1.186146 | FALSE | Photoreceptor          |
| TCATGCCC db/db2 | db/db | 994   | 0.012557 | FALSE | 0.088109 | FALSE | Photoreceptor          |
| TCATGCCC db/db2 | db/db | 2434  | 0.029266 | FALSE | 0.798257 | FALSE | Photoreceptor          |
| TCATGCCC db/db2 | db/db | 4321  | 0.024534 | FALSE | 1.154209 | FALSE | Endothelia Capillary E |
| TCATGCCT db/db2 | db/db | 438   | 0.17103  | TRUE  | 5.379747 | TRUE  |                        |
| TCATGCCT db/db2 | db/db | 6069  | 0.03313  | FALSE | 0.953899 | FALSE | Photoreceptor          |
| TCATGGAC db/db2 | db/db | 1791  | 0.045165 | FALSE | 2.343813 | FALSE | Photoreceptor          |
| TCATGGAC db/db2 | db/db | 2742  | 0.010614 | FALSE | 1.076626 | FALSE | Endothelia Venous EC   |
| TCATGGAC db/db2 | db/db | 654   | 0.008234 | FALSE | 1.896304 | FALSE | Endothelia Capillary E |
| TCATGGAC db/db2 | db/db | 1477  | 0.015287 | FALSE | 1.258119 | FALSE | Endothelia Capillary E |
| TCATGGAC db/db2 | db/db | 1547  | 0.016799 | FALSE | 1.527355 | FALSE | Endothelia Capillary E |
| TCATGGAT db/db2 | db/db | 1472  | 0.046906 | FALSE | 3.355986 | FALSE | Muller cell            |
| TCATGTTT db/db2 | db/db | 3031  | 0.027758 | FALSE | 0.770528 | FALSE | Microglia              |
| TCATTACA db/db2 | db/db | 1234  | 0.030859 | FALSE | 3.742525 | FALSE | Muller cell            |
| TCATTACA db/db2 | db/db | 3733  | 0.024534 | FALSE | 1.138903 | FALSE | Endothelia Venous EC   |
| TCATTACG db/db2 | db/db | 3124  | 0.048732 | FALSE | 0.772871 | FALSE | Photoreceptor          |
| TCATTACG db/db2 | db/db | 4882  | 0.017114 | FALSE | 1.001355 | FALSE | Endothelia Venous EC   |
| TCATTACG db/db2 | db/db | 1141  | 0.030318 | FALSE | 1.412491 | FALSE | Photoreceptor          |
| TCATTACT db/db2 | db/db | 10602 | 0.054795 | FALSE | 0.593322 | FALSE | Photoreceptor          |
| TCATTCAA db/db2 | db/db | 3955  | 0.023682 | FALSE | 0.904818 | FALSE | Photoreceptor          |
| TCATTCAA db/db2 | db/db | 2783  | 0.05065  | FALSE | 1.619995 | FALSE | Endothelia Capillary E |
| TCATTCAG db/db2 | db/db | 330   | 0.314286 | TRUE  | 20.83333 | TRUE  |                        |
| TCATTCAT db/db2 | db/db | 4522  | 0.029787 | FALSE | 1.094043 | FALSE | Endothelia EC-C4       |
| TCATTCAT db/db2 | db/db | 1558  | 0.034334 | FALSE | 1.498134 | FALSE | Photoreceptor          |
| TCATTGTA db/db2 | db/db | 8777  | 0.033726 | FALSE | 0.647308 | FALSE | Photoreceptor          |
| TCATTGTG db/db2 | db/db | 792   | 0.008644 | FALSE | 0.57588  | FALSE | Pericyte               |
| TCATTGTG db/db2 | db/db | 2028  | 0.030318 | FALSE | 1.168336 | FALSE | Endothelia EC-C4       |
| TCATTGTG db/db2 | db/db | 5818  | 0.021669 | FALSE | 0.755414 | FALSE | Photoreceptor          |
| TCATTGTG db/db2 | db/db | 813   | 0.015287 | FALSE | 2.455561 | FALSE | Pericyte               |
| TCATTGTT db/db2 | db/db | 8498  | 0.012814 | FALSE | 0.533802 | FALSE | Photoreceptor          |
| TCATTGTT db/db2 | db/db | 4499  | 0.029787 | FALSE | 0.867166 | FALSE | Photoreceptor          |
| TCATTTGA db/db2 | db/db | 6052  | 0.022455 | FALSE | 0.914958 | FALSE | Endothelia Capillary E |
| TCATTTGC db/db2 | db/db | 404   | 0.009277 | FALSE | 1.939455 | FALSE | Photoreceptor          |
| TCATTTGC db/db2 | db/db | 2948  | 0.029787 | FALSE | 1.631724 | FALSE | Pericyte               |
| TCATTTGT db/db2 | db/db | 2706  | 0.052669 | FALSE | 0.715095 | FALSE | Neuron                 |
| TCCACCAA db/db2 | db/db | 4049  | 0.093319 | FALSE | 1.757247 | FALSE | Muller cell            |
| TCCACCAA db/db2 | db/db | 4704  | 0.012052 | FALSE | 0.890185 | FALSE | Endothelia Venous EC   |
| TCCACCAA db/db2 | db/db | 419   | 0.018761 | FALSE | 35.74939 | TRUE  |                        |
| TCCACCAA db/db2 | db/db | 3283  | 0.055901 | FALSE | 1.50104  | FALSE | Photoreceptor          |
| TCCACCAA db/db2 | db/db | 2023  | 0.018088 | FALSE | 1.250892 | FALSE | Endothelia Capillary E |
| TCCACCAC db/db2 | db/db | 1737  | 0.078788 | FALSE | 2.292906 | FALSE | Muller cell            |
| TCCACCAG db/db2 | db/db | 1226  | 0.075259 | FALSE | 1.419883 | FALSE | Photoreceptor          |
| TCCACCAG db/db2 | db/db | 1269  | 0.020908 | FALSE | 0.798882 | FALSE | Photoreceptor          |
| TCCACCAG db/db2 | db/db | 1099  | 0.098234 | FALSE | 11.7797  | TRUE  |                        |
| TCCACCAT db/db2 | db/db | 2399  | 0.04192  | FALSE | 0.870249 | FALSE | Photoreceptor          |
| TCCACCAT db/db2 | db/db | 6115  | 0.015581 | FALSE | 0.894029 | FALSE | Photoreceptor          |
| TCCACGTC db/db2 | db/db | 6081  | 0.032546 | FALSE | 1.041482 | FALSE | Endothelia Venous EC   |

|                 |       |      |          |       |          |       |                        |
|-----------------|-------|------|----------|-------|----------|-------|------------------------|
| TCCACGTC db/db2 | db/db | 3889 | 0.020536 | FALSE | 1.049174 | FALSE | Photoreceptor          |
| TCCACGTT db/db2 | db/db | 1420 | 0.052669 | FALSE | 1.141588 | FALSE | Photoreceptor          |
| TCCAGAA db/db2  | db/db | 413  | 0.036232 | FALSE | 2.393182 | FALSE | Muller cell            |
| TCCAGAAC db/db2 | db/db | 2315 | 0.016488 | FALSE | 1.323484 | FALSE | Endothelia Capillary E |
| TCCAGAAC db/db2 | db/db | 3487 | 0.022059 | FALSE | 1.082207 | FALSE | Endothelia Capillary E |
| TCCAGAAC db/db2 | db/db | 790  | 0.010614 | FALSE | 2.583266 | FALSE | Muller cell            |
| TCCAGAAC db/db2 | db/db | 9622 | 0.015879 | FALSE | 0.608599 | FALSE | Photoreceptor          |
| TCCAGAAC db/db2 | db/db | 3022 | 0.010157 | FALSE | 1.14032  | FALSE | Endothelia Capillary E |
| TCCAGAAC db/db2 | db/db | 4333 | 0.093319 | FALSE | 1.339211 | FALSE | Photoreceptor          |
| TCCAGAAC db/db2 | db/db | 4483 | 0.029787 | FALSE | 0.670359 | FALSE | Photoreceptor          |
| TCCATCGC db/db2 | db/db | 2041 | 0.020171 | FALSE | 1.009706 | FALSE | Endothelia EC-C4       |
| TCCATCGT db/db2 | db/db | 2227 | 0.012557 | FALSE | 0.413762 | FALSE | Photoreceptor          |
| TCCATGCG db/db2 | db/db | 471  | 0.014711 | FALSE | 3.024908 | FALSE | Photoreceptor          |
| TCCATGCT db/db2 | db/db | 534  | 0.029266 | FALSE | 0.804873 | FALSE | Muller cell            |
| TCCCACAA db/db2 | db/db | 481  | 0.080645 | FALSE | 4.369614 | FALSE | Muller cell            |
| TCCCACAA db/db2 | db/db | 4767 | 0.021286 | FALSE | 0.742272 | FALSE | Photoreceptor          |
| TCCCACAC db/db2 | db/db | 3823 | 0.031973 | FALSE | 0.873753 | FALSE | Photoreceptor          |
| TCCCACAC db/db2 | db/db | 455  | 0.051646 | FALSE | 0.416608 | FALSE | Photoreceptor          |
| TCCCACAT db/db2 | db/db | 2665 | 0.017434 | FALSE | 0.931832 | FALSE | Endothelia Capillary E |
| TCCCACAT db/db2 | db/db | 6760 | 0.024534 | FALSE | 0.903169 | FALSE | Endothelia EC-C4       |
| TCCCACAT db/db2 | db/db | 3513 | 0.067388 | FALSE | 1.152708 | FALSE | Photoreceptor          |
| TCCCAGTA db/db2 | db/db | 1942 | 0.019106 | FALSE | 0.310611 | FALSE | Photoreceptor          |
| TCCCAGTC db/db2 | db/db | 3252 | 0.017758 | FALSE | 0.586179 | FALSE | Photoreceptor          |
| TCCCAGTC db/db2 | db/db | 528  | 0.043505 | FALSE | 31.55173 | TRUE  |                        |
| TCCCATGC db/db2 | db/db | 2891 | 0.023266 | FALSE | 0.961125 | FALSE | Endothelia EC-C4       |
| TCCCATGC db/db2 | db/db | 1932 | 0.058205 | FALSE | 1.544399 | FALSE | Photoreceptor          |
| TCCCATGT db/db2 | db/db | 2329 | 0.067388 | FALSE | 1.668541 | FALSE | Endothelia EC-C4       |
| TCCGAAA db/db2  | db/db | 1017 | 0.119124 | TRUE  | 7.83467  | TRUE  |                        |
| TCCGAAAC db/db2 | db/db | 2036 | 0.015879 | FALSE | 1.165685 | FALSE | Endothelia Capillary E |
| TCCGAAAC db/db2 | db/db | 360  | 0.070386 | FALSE | 27.96748 | TRUE  |                        |
| TCCGAAAC db/db2 | db/db | 1629 | 0.012557 | FALSE | 1.149807 | FALSE | Endothelia Capillary E |
| TCCGAAAC db/db2 | db/db | 3581 | 0.013074 | FALSE | 1.025304 | FALSE | Endothelia Venous EC   |
| TCCGAAAC db/db2 | db/db | 5222 | 0.040404 | FALSE | 0.975717 | FALSE | Photoreceptor          |
| TCCGATCA db/db2 | db/db | 3365 | 0.013605 | FALSE | 1.277508 | FALSE | Photoreceptor          |
| TCCGATCA db/db2 | db/db | 1374 | 0.009712 | FALSE | 1.058768 | FALSE | Endothelia Capillary E |
| TCCGATCG db/db2 | db/db | 1143 | 0.013605 | FALSE | 0.675281 | FALSE | Photoreceptor          |
| TCCGATCG db/db2 | db/db | 789  | 0.030859 | FALSE | 2.4949   | FALSE | Photoreceptor          |
| TCCGATCT db/db2 | db/db | 8936 | 0.084562 | FALSE | 0.722875 | FALSE | Photoreceptor          |
| TCCGATCT db/db2 | db/db | 1043 | 0.029266 | FALSE | 2.206863 | FALSE | Photoreceptor          |
| TCCGATCT db/db2 | db/db | 3239 | 0.019106 | FALSE | 1.118935 | FALSE | Endothelia Capillary E |
| TCCGATCT db/db2 | db/db | 4824 | 0.022455 | FALSE | 0.719733 | FALSE | Photoreceptor          |
| TCCGATCT db/db2 | db/db | 1678 | 0.010384 | FALSE | 1.431468 | FALSE | Endothelia Capillary E |
| TCCGGGA db/db2  | db/db | 882  | 0.012814 | FALSE | 3.975973 | FALSE | Muller cell            |
| TCCGGGA db/db2  | db/db | 2435 | 0.027758 | FALSE | 1.305306 | FALSE | Endothelia Capillary E |
| TCCGGGA db/db2  | db/db | 2260 | 0.018761 | FALSE | 1.155533 | FALSE | Endothelia Capillary E |
| TCCGGGA db/db2  | db/db | 6005 | 0.025868 | FALSE | 0.862797 | FALSE | Endothelia Capillary E |
| TCCGTGTC db/db2 | db/db | 8069 | 0.031411 | FALSE | 0.878569 | FALSE | Photoreceptor          |



|                 |       |       |          |       |          |       |                        |
|-----------------|-------|-------|----------|-------|----------|-------|------------------------|
| TCCGTGTC db/db2 | db/db | 2688  | 0.022857 | FALSE | 1.361448 | FALSE | Endothelia Capillary E |
| TCCGTGTT db/db2 | db/db | 1542  | 0.036232 | FALSE | 3.008097 | FALSE | Photoreceptor          |
| TCCTAATA db/db2 | db/db | 3008  | 0.014711 | FALSE | 1.232511 | FALSE | Endothelia Aterial EC  |
| TCCTAATA db/db2 | db/db | 354   | 0.034954 | FALSE | 1.065234 | FALSE | Microglia              |
| TCCTAATT db/db2 | db/db | 2203  | 0.073582 | FALSE | 1.755153 | FALSE | Photoreceptor          |
| TCCTCCCG db/db2 | db/db | 1459  | 0.076994 | FALSE | 1.249978 | FALSE | Photoreceptor          |
| TCCTCCCG db/db2 | db/db | 1576  | 0.013876 | FALSE | 1.073139 | FALSE | Endothelia Aterial EC  |
| TCCTCCCT db/db2 | db/db | 7011  | 0.016488 | FALSE | 0.507105 | FALSE | Photoreceptor          |
| TCCTCCCT db/db2 | db/db | 3016  | 0.057037 | FALSE | 1.570588 | FALSE | Photoreceptor          |
| TCCTCGAA db/db2 | db/db | 760   | 0.15354  | TRUE  | 6.536502 | TRUE  |                        |
| TCCTCGAA db/db2 | db/db | 586   | 0.055901 | FALSE | 4.385101 | FALSE | Muller cell            |
| TCCTCGAC db/db2 | db/db | 1262  | 0.036891 | FALSE | 1.74406  | FALSE | Photoreceptor          |
| TCCTCGAT db/db2 | db/db | 6865  | 0.030318 | FALSE | 0.814061 | FALSE | Photoreceptor          |
| TCCTCGAT db/db2 | db/db | 2295  | 0.012303 | FALSE | 0.959481 | FALSE | Endothelia EC-C4       |
| TCCTCGAT db/db2 | db/db | 6388  | 0.026328 | FALSE | 0.859493 | FALSE | Photoreceptor          |
| TCCTCTTA db/db2 | db/db | 2743  | 0.027273 | FALSE | 0.757599 | FALSE | Photoreceptor          |
| TCCTCTTA db/db2 | db/db | 4533  | 0.023266 | FALSE | 1.288382 | FALSE | Photoreceptor          |
| TCCTCTTC db/db2 | db/db | 1769  | 0.044326 | FALSE | 0.636041 | FALSE | Photoreceptor          |
| TCCTCTTC db/db2 | db/db | 10864 | 0.073582 | FALSE | 0.554825 | FALSE | Photoreceptor          |
| TCCTCTTG db/db2 | db/db | 404   | 0.038953 | FALSE | 1.736927 | FALSE | Photoreceptor          |
| TCCTCTTG db/db2 | db/db | 3016  | 0.039671 | FALSE | 1.063201 | FALSE | Endothelia EC-C4       |
| TCCTCTTG db/db2 | db/db | 1121  | 0.045165 | FALSE | 1.728449 | FALSE | Photoreceptor          |
| TCCTCTTT db/db2 | db/db | 1943  | 0.024105 | FALSE | 1.078935 | FALSE | Photoreceptor          |
| TCCTCTTT db/db2 | db/db | 1954  | 0.036891 | FALSE | 1.068067 | FALSE | Photoreceptor          |
| TCCTGCAA db/db2 | db/db | 1544  | 0.023266 | FALSE | 3.657725 | FALSE | Muller cell            |
| TCCTGCAA db/db2 | db/db | 543   | 0.008852 | FALSE | 2.118464 | FALSE | Endothelia Capillary E |
| TCCTGCAC db/db2 | db/db | 2102  | 0.018761 | FALSE | 0.961453 | FALSE | Endothelia EC-C4       |
| TCCTGCAC db/db2 | db/db | 5041  | 0.027758 | FALSE | 0.942579 | FALSE | Endothelia Venous EC   |
| TCCTGCAC db/db2 | db/db | 879   | 0.04192  | FALSE | 4.626876 | FALSE | Muller cell            |
| TCCTGCAC db/db2 | db/db | 3152  | 0.025868 | FALSE | 0.56355  | FALSE | Photoreceptor          |
| TCCTGCAC db/db2 | db/db | 2758  | 0.109375 | TRUE  | 5.611672 | TRUE  |                        |
| TCCTTCTC db/db2 | db/db | 3102  | 0.035586 | FALSE | 0.904013 | FALSE | Microglia              |
| TCCTTTCA db/db2 | db/db | 491   | 0.073582 | FALSE | 4.474997 | FALSE | Muller cell            |
| TCCTTTCG db/db2 | db/db | 2579  | 0.019455 | FALSE | 0.250701 | FALSE | Photoreceptor          |
| TCCTTTCG db/db2 | db/db | 7016  | 0.122691 | TRUE  | 3.8452   | FALSE |                        |
| TCCTTTCG db/db2 | db/db | 7022  | 0.025868 | FALSE | 0.774233 | FALSE | Photoreceptor          |
| TCCTTTCG db/db2 | db/db | 2301  | 0.022857 | FALSE | 0.986266 | FALSE | Endothelia EC-C4       |
| TCGAAGT db/db2  | db/db | 1345  | 0.023682 | FALSE | 1.456903 | FALSE | Endothelia Venous EC   |
| TCGAAGT db/db2  | db/db | 5237  | 0.028251 | FALSE | 0.994092 | FALSE | Photoreceptor          |
| TCGAAGT db/db2  | db/db | 6072  | 0.042704 | FALSE | 1.010751 | FALSE | Photoreceptor          |
| TCGAAGT db/db2  | db/db | 828   | 0.029266 | FALSE | 1.073928 | FALSE | Pericyte               |
| TCGAAGT db/db2  | db/db | 10034 | 0.084562 | FALSE | 0.622417 | FALSE | Photoreceptor          |
| TCGACCTA db/db2 | db/db | 402   | 0.042704 | FALSE | 31.9222  | TRUE  |                        |
| TCGACCTA db/db2 | db/db | 894   | 0.008234 | FALSE | 1.727631 | FALSE | Endothelia Capillary E |
| TCGACCTA db/db2 | db/db | 1578  | 0.093319 | FALSE | 2.749652 | FALSE | Photoreceptor          |
| TCGACCTC db/db2 | db/db | 2738  | 0.020536 | FALSE | 1.069538 | FALSE | Photoreceptor          |
| TCGACCTC db/db2 | db/db | 2249  | 0.018761 | FALSE | 0.913176 | FALSE | Endothelia Capillary E |

|                 |       |      |          |       |          |       |                        |
|-----------------|-------|------|----------|-------|----------|-------|------------------------|
| TCGACGG/db/db2  | db/db | 4928 | 0.023682 | FALSE | 1.839183 | FALSE | Muller cell            |
| TCGACGG/db/db2  | db/db | 3171 | 0.016181 | FALSE | 0.939759 | FALSE | Endothelia Venous EC   |
| TCGACGG/db/db2  | db/db | 1157 | 0.05065  | FALSE | 2.02349  | FALSE | Photoreceptor          |
| TCGACGG/db/db2  | db/db | 1410 | 0.010846 | FALSE | 1.716379 | FALSE | Photoreceptor          |
| TCGATTG/db/db2  | db/db | 926  | 0.044326 | FALSE | 3.032479 | FALSE | Muller cell            |
| TCGATTG/db/db2  | db/db | 1578 | 0.013876 | FALSE | 1.593202 | FALSE | Endothelia Capillary E |
| TCGACTC/db/db2  | db/db | 5531 | 0.031411 | FALSE | 1.04609  | FALSE | Endothelia Venous EC   |
| TCGCAGG/db/db2  | db/db | 2922 | 0.054795 | FALSE | 1.115523 | FALSE | Photoreceptor          |
| TCGCAGG/db/db2  | db/db | 2236 | 0.108718 | TRUE  | 2.195333 | FALSE |                        |
| TCGCAGG/db/db2  | db/db | 6407 | 0.063221 | FALSE | 1.182769 | FALSE | Photoreceptor          |
| TCGCTCA/db/db2  | db/db | 4827 | 0.028251 | FALSE | 1.335415 | FALSE | Photoreceptor          |
| TCGCTCAC/db/db2 | db/db | 904  | 0.030859 | FALSE | 2.788366 | FALSE | Photoreceptor          |
| TCGCTCAC/db/db2 | db/db | 2053 | 0.032546 | FALSE | 1.097215 | FALSE | Endothelia EC-C4       |
| TCGCTCAT/db/db2 | db/db | 1892 | 0.073582 | FALSE | 5.733029 | TRUE  |                        |
| TCGCTCAT/db/db2 | db/db | 3336 | 0.019106 | FALSE | 0.893954 | FALSE | Endothelia Venous EC   |
| TCGCTCAT/db/db2 | db/db | 5138 | 0.038953 | FALSE | 1.224293 | FALSE | Photoreceptor          |
| TCGCTTGC/db/db2 | db/db | 6023 | 0.020171 | FALSE | 0.905165 | FALSE | Photoreceptor          |
| TCGCTTGT/db/db2 | db/db | 1975 | 0.009712 | FALSE | 1.303507 | FALSE | Endothelia EC-C4       |
| TCGCTTGT/db/db2 | db/db | 7305 | 0.031411 | FALSE | 0.61347  | FALSE | Photoreceptor          |
| TCGGATA/db/db2  | db/db | 1255 | 0.008852 | FALSE | 1.084753 | FALSE | Photoreceptor          |
| TCGGATA/db/db2  | db/db | 1738 | 0.021669 | FALSE | 1.385574 | FALSE | Endothelia Capillary E |
| TCGGGAC/db/db2  | db/db | 9924 | 0.032546 | FALSE | 0.582096 | FALSE | Photoreceptor          |
| TCGGGAC/db/db2  | db/db | 256  | 0.022059 | FALSE | 66.0021  | TRUE  |                        |
| TCGGGAC/db/db2  | db/db | 9519 | 0.029266 | FALSE | 0.669457 | FALSE | Photoreceptor          |
| TCGGGCA/db/db2  | db/db | 813  | 0.01981  | FALSE | 2.634908 | FALSE | Endothelia Capillary E |
| TCGGGCA/db/db2  | db/db | 8333 | 0.065957 | FALSE | 0.89661  | FALSE | Photoreceptor          |
| TCGGGCA/db/db2  | db/db | 4928 | 0.063221 | FALSE | 1.670198 | FALSE | Neuron                 |
| TCGGGCA/db/db2  | db/db | 577  | 0.014997 | FALSE | 2.752353 | FALSE | Muller cell            |
| TCGGGCA/db/db2  | db/db | 365  | 0.051646 | FALSE | 3.317546 | FALSE | Endothelia Capillary E |
| TCGGGCA/db/db2  | db/db | 1349 | 0.029787 | FALSE | 1.885567 | FALSE | Endothelia Capillary E |
| TCGGGCA/db/db2  | db/db | 1031 | 0.026796 | FALSE | 2.109273 | FALSE | Endothelia Capillary E |
| TCGGGCA/db/db2  | db/db | 546  | 0.03313  | FALSE | 1.464722 | FALSE | Photoreceptor          |
| TCGGGCA/db/db2  | db/db | 2908 | 0.003345 | FALSE | 1.064856 | FALSE | Neuron                 |
| TCGGGTG/db/db2  | db/db | 401  | 0.051646 | FALSE | 41.94444 | TRUE  |                        |
| TCGGGTG/db/db2  | db/db | 5101 | 0.126437 | TRUE  | 5.354414 | TRUE  |                        |
| TCGGGTG/db/db2  | db/db | 3491 | 0.036891 | FALSE | 1.326087 | FALSE | Photoreceptor          |
| TCGGGTG/db/db2  | db/db | 4967 | 0.022455 | FALSE | 0.746955 | FALSE | Photoreceptor          |
| TCGGGTG/db/db2  | db/db | 1614 | 0.123864 | TRUE  | 2.075327 | FALSE |                        |
| TCGGTCTA/db/db2 | db/db | 1486 | 0.014711 | FALSE | 1.49324  | FALSE | Endothelia Capillary E |
| TCGGTCTA/db/db2 | db/db | 4490 | 0.047807 | FALSE | 6.63049  | TRUE  |                        |
| TCGGTCTC/db/db2 | db/db | 3598 | 0.014711 | FALSE | 0.43582  | FALSE | Photoreceptor          |
| TCGGTCTC/db/db2 | db/db | 656  | 0.054795 | FALSE | 4.633431 | FALSE | Muller cell            |
| TCGGTCTC/db/db2 | db/db | 5874 | 0.032546 | FALSE | 0.866144 | FALSE | Endothelia EC-C4       |
| TCGGTCTC/db/db2 | db/db | 795  | 0.01981  | FALSE | 2.08987  | FALSE | Endothelia Capillary E |
| TCGGTCTT/db/db2 | db/db | 1608 | 0.078788 | FALSE | 2.640909 | FALSE | Muller cell            |
| TCGGTCTT/db/db2 | db/db | 2072 | 0.03313  | FALSE | 1.046422 | FALSE | Photoreceptor          |
| TCGGTCTT/db/db2 | db/db | 9435 | 0.022455 | FALSE | 0.563318 | FALSE | Photoreceptor          |

|                 |       |      |          |       |          |       |                        |
|-----------------|-------|------|----------|-------|----------|-------|------------------------|
| TCGTCCAA db/db2 | db/db | 6776 | 0.143501 | TRUE  | 2.774151 | FALSE |                        |
| TCGTCCAA db/db2 | db/db | 881  | 0.024971 | FALSE | 0.515284 | FALSE | Photoreceptor          |
| TCGTCCAA db/db2 | db/db | 1307 | 0.029787 | FALSE | 1.669534 | FALSE | Endothelia Capillary E |
| TCGTCCAC db/db2 | db/db | 1998 | 0.075259 | FALSE | 0.871395 | FALSE | Photoreceptor          |
| TCGTCCAT db/db2 | db/db | 1489 | 0.036232 | FALSE | 0.474234 | FALSE | Photoreceptor          |
| TCGTCCAT db/db2 | db/db | 2223 | 0.024534 | FALSE | 1.566844 | FALSE | Endothelia Capillary E |
| TCGTGCTA db/db2 | db/db | 1126 | 0.04192  | FALSE | 4.77248  | FALSE | Muller cell            |
| TCGTGCTG db/db2 | db/db | 1670 | 0.028251 | FALSE | 1.128579 | FALSE | Endothelia Capillary E |
| TCGTGGG db/db2  | db/db | 1935 | 0.031411 | FALSE | 1.513796 | FALSE | Endothelia Capillary E |
| TCGTGGG db/db2  | db/db | 4506 | 0.033726 | FALSE | 0.989836 | FALSE | Endothelia Venous EC   |
| TCGTGGG db/db2  | db/db | 4959 | 0.031973 | FALSE | 1.055954 | FALSE | Photoreceptor          |
| TCGTGGG db/db2  | db/db | 1333 | 0.061912 | FALSE | 0.839499 | FALSE | Photoreceptor          |
| TCGTGGG db/db2  | db/db | 2261 | 0.038953 | FALSE | 1.141933 | FALSE | Endothelia Capillary E |
| TCGTGGG db/db2  | db/db | 1933 | 0.014429 | FALSE | 1.004239 | FALSE | Photoreceptor          |
| TCGTGGG db/db2  | db/db | 722  | 0.045165 | FALSE | 1.446061 | FALSE | Endothelia Capillary E |
| TCGTGGG db/db2  | db/db | 1964 | 0.020908 | FALSE | 1.12231  | FALSE | Pericyte               |
| TCTAACTA db/db2 | db/db | 1044 | 0.067388 | FALSE | 1.864327 | FALSE | Photoreceptor          |
| TCTAACTC db/db2 | db/db | 6898 | 0.138889 | TRUE  | 4.237808 | FALSE |                        |
| TCTAACTC db/db2 | db/db | 5819 | 0.018088 | FALSE | 0.563525 | FALSE | Photoreceptor          |
| TCTAACTG db/db2 | db/db | 626  | 0.046906 | FALSE | 3.633396 | FALSE | Muller cell            |
| TCTAACTG db/db2 | db/db | 412  | 0.034954 | FALSE | 40.50633 | TRUE  |                        |
| TCTAACTT db/db2 | db/db | 4384 | 0.015287 | FALSE | 0.959855 | FALSE | Endothelia Capillary E |
| TCTACATA db/db2 | db/db | 715  | 0.05065  | FALSE | 39.31178 | TRUE  |                        |
| TCTACATG db/db2 | db/db | 4371 | 0.034334 | FALSE | 1.023699 | FALSE | Endothelia Venous EC   |
| TCTACATG db/db2 | db/db | 2636 | 0.015879 | FALSE | 0.347287 | FALSE | Photoreceptor          |
| TCTACATT db/db2 | db/db | 792  | 0.038251 | FALSE | 3.896017 | FALSE | Muller cell            |
| TCTACATT db/db2 | db/db | 1384 | 0.037564 | FALSE | 2.09527  | FALSE | Photoreceptor          |
| TCTACCGA db/db2 | db/db | 2037 | 0.017758 | FALSE | 1.162608 | FALSE | Endothelia EC-C4       |
| TCTACCGA db/db2 | db/db | 7718 | 0.011561 | FALSE | 0.930964 | FALSE | Photoreceptor          |
| TCTACCGC db/db2 | db/db | 3863 | 0.020171 | FALSE | 1.181244 | FALSE | Photoreceptor          |
| TCTACCGG db/db2 | db/db | 8221 | 0.01981  | FALSE | 0.716161 | FALSE | Photoreceptor          |
| TCTACCGT db/db2 | db/db | 2537 | 0.018422 | FALSE | 1.046289 | FALSE | Endothelia Capillary E |
| TCTACCGT db/db2 | db/db | 1354 | 0.055901 | FALSE | 1.457017 | FALSE | Photoreceptor          |
| TCTATACA db/db2 | db/db | 2512 | 0.003803 | FALSE | 1.238359 | FALSE | Pericyte               |
| TCTATACA db/db2 | db/db | 5967 | 0.024105 | FALSE | 0.767711 | FALSE | Photoreceptor          |
| TCTATACT db/db2 | db/db | 502  | 0.061912 | FALSE | 0.421957 | FALSE | Muller cell            |
| TCTATCAA db/db2 | db/db | 9030 | 0.014429 | FALSE | 0.65689  | FALSE | Photoreceptor          |
| TCTATCAC db/db2 | db/db | 1013 | 0.112564 | TRUE  | 3.53443  | FALSE |                        |
| TCTATCAG db/db2 | db/db | 1633 | 0.037564 | FALSE | 1.416099 | FALSE | Endothelia Capillary E |
| TCTCACGC db/db2 | db/db | 931  | 0.011081 | FALSE | 2.559065 | FALSE | Endothelia Capillary E |
| TCTCACGC db/db2 | db/db | 1226 | 0.026328 | FALSE | 2.343818 | FALSE | Photoreceptor          |
| TCTCACGC db/db2 | db/db | 472  | 0.021286 | FALSE | 1.990406 | FALSE | Photoreceptor          |
| TCTCACGT db/db2 | db/db | 2129 | 0.013605 | FALSE | 1.246724 | FALSE | Endothelia EC-C4       |
| TCTCAGCA db/db2 | db/db | 555  | 0.031411 | FALSE | 4.253256 | FALSE | Muller cell            |
| TCTCAGCC db/db2 | db/db | 358  | 0.023266 | FALSE | 19.43925 | TRUE  |                        |
| TCTCAGCC db/db2 | db/db | 4664 | 0.018422 | FALSE | 0.922988 | FALSE | Endothelia Venous EC   |
| TCTCAGCC db/db2 | db/db | 1291 | 0.122691 | TRUE  | 3.659696 | FALSE |                        |

|                 |       |      |          |       |          |       |                        |
|-----------------|-------|------|----------|-------|----------|-------|------------------------|
| TCTCAGCT db/db2 | db/db | 2810 | 0.01981  | FALSE | 1.043596 | FALSE | Endothelia Venous EC   |
| TCTCAGCT db/db2 | db/db | 2251 | 0.027273 | FALSE | 1.624146 | FALSE | Neuron                 |
| TCTCCGAA db/db2 | db/db | 500  | 0.042704 | FALSE | 38.2579  | TRUE  |                        |
| TCTCCGAC db/db2 | db/db | 2476 | 0.021669 | FALSE | 1.257745 | FALSE | Endothelia Capillary E |
| TCTCTGGC db/db2 | db/db | 2265 | 0.014151 | FALSE | 0.932652 | FALSE | Endothelia Capillary E |
| TCTGCCAA db/db2 | db/db | 1582 | 0.067388 | FALSE | 1.786157 | FALSE | Photoreceptor          |
| TCTGGCTA db/db2 | db/db | 5003 | 0.018088 | FALSE | 1.029087 | FALSE | Endothelia Venous EC   |
| TCTGGCTA db/db2 | db/db | 319  | 0.019455 | FALSE | 66.88312 | TRUE  |                        |
| TCTGGCTC db/db2 | db/db | 1311 | 0.048732 | FALSE | 1.391987 | FALSE | Endothelia EC-C4       |
| TCTGGCTC db/db2 | db/db | 1644 | 0.067388 | FALSE | 1.055831 | FALSE | Photoreceptor          |
| TCTGGCTT db/db2 | db/db | 3616 | 0.031973 | FALSE | 1.196471 | FALSE | Photoreceptor          |
| TCTGTCGC db/db2 | db/db | 3020 | 0.049679 | FALSE | 1.630477 | FALSE | Photoreceptor          |
| TCTGTCGC db/db2 | db/db | 1772 | 0.030318 | FALSE | 0.437173 | FALSE | Photoreceptor          |
| TCTGTCGC db/db2 | db/db | 7560 | 0.024971 | FALSE | 0.756032 | FALSE | Photoreceptor          |
| TCTTAGTA db/db2 | db/db | 2057 | 0.028251 | FALSE | 1.050269 | FALSE | Endothelia Capillary E |
| TCTTAGTA db/db2 | db/db | 5060 | 0.023682 | FALSE | 0.926887 | FALSE | Photoreceptor          |
| TCTTAGTG db/db2 | db/db | 940  | 0.041154 | FALSE | 0.793989 | FALSE | Photoreceptor          |
| TCTTAGTT db/db2 | db/db | 951  | 0.026328 | FALSE | 2.066901 | FALSE | Photoreceptor          |
| TCTTCCTA db/db2 | db/db | 3565 | 0.05065  | FALSE | 0.917808 | FALSE | Endothelia EC-C4       |
| TCTTCCTA db/db2 | db/db | 1201 | 0.076994 | FALSE | 1.867143 | FALSE | Photoreceptor          |
| TCTTCCTA db/db2 | db/db | 557  | 0.075259 | FALSE | 3.793586 | FALSE | Photoreceptor          |
| TCTTCCTG db/db2 | db/db | 3627 | 0.034334 | FALSE | 0.617536 | FALSE | Photoreceptor          |
| TCTTCCTG db/db2 | db/db | 8688 | 0.022857 | FALSE | 0.746716 | FALSE | Photoreceptor          |
| TCTTCCTT db/db2 | db/db | 1216 | 0.071958 | FALSE | 2.239654 | FALSE | Photoreceptor          |
| TCTTCCTT db/db2 | db/db | 950  | 0.080645 | FALSE | 1.862455 | FALSE | Photoreceptor          |
| TCTTCCTT db/db2 | db/db | 2847 | 0.012814 | FALSE | 0.975079 | FALSE | Endothelia Aterial EC  |
| TCTTGCGA db/db2 | db/db | 2993 | 0.027758 | FALSE | 1.176845 | FALSE | Microglia              |
| TCTTGCGA db/db2 | db/db | 1253 | 0.009712 | FALSE | 1.59678  | FALSE | Endothelia Capillary E |
| TCTTGCGC db/db2 | db/db | 4126 | 0.051646 | FALSE | 1.58204  | FALSE | Photoreceptor          |
| TCTTGCGC db/db2 | db/db | 3318 | 0.014997 | FALSE | 1.048388 | FALSE | Endothelia EC-C4       |
| TCTTGCGC db/db2 | db/db | 1234 | 0.038953 | FALSE | 1.387535 | FALSE | Endothelia Capillary E |
| TCTTTGAG db/db2 | db/db | 9411 | 0.013338 | FALSE | 0.475545 | FALSE | Photoreceptor          |
| TCTTTGAG db/db2 | db/db | 4544 | 0.016799 | FALSE | 1.023393 | FALSE | Endothelia Venous EC   |
| TGAACGT db/db2  | db/db | 3546 | 0.036891 | FALSE | 0.951888 | FALSE | Photoreceptor          |
| TGAATCGC db/db2 | db/db | 2884 | 0.027273 | FALSE | 1.532696 | FALSE | Neuron                 |
| TGAATCGC db/db2 | db/db | 3983 | 0.106408 | TRUE  | 3.896104 | FALSE |                        |
| TGAATCGT db/db2 | db/db | 1234 | 0.027758 | FALSE | 1.782177 | FALSE | Muller cell            |
| TGAATCGT db/db2 | db/db | 6021 | 0.061912 | FALSE | 1.670755 | FALSE | Muller cell            |
| TGAATCGT db/db2 | db/db | 906  | 0.057037 | FALSE | 1.466363 | FALSE | Photoreceptor          |
| TGAATGC db/db2  | db/db | 2035 | 0.08663  | FALSE | 9.49144  | TRUE  |                        |
| TGAATGCC db/db2 | db/db | 1026 | 0.046906 | FALSE | 1.071511 | FALSE | Photoreceptor          |
| TGAATGCC db/db2 | db/db | 3864 | 0.130259 | TRUE  | 1.334961 | FALSE |                        |
| TGAATGCC db/db2 | db/db | 2710 | 0.153234 | TRUE  | 3.373356 | FALSE |                        |
| TGAATGCC db/db2 | db/db | 1834 | 0.010846 | FALSE | 1.364385 | FALSE | Endothelia Capillary E |
| TGAATGCT db/db2 | db/db | 1620 | 0.054795 | FALSE | 1.491825 | FALSE | Photoreceptor          |
| TGACAGT db/db2  | db/db | 1095 | 0.038953 | FALSE | 1.221783 | FALSE | Photoreceptor          |
| TGACAGT db/db2  | db/db | 1537 | 0.031411 | FALSE | 2.073877 | FALSE | Photoreceptor          |

|                 |       |      |          |       |          |       |                        |
|-----------------|-------|------|----------|-------|----------|-------|------------------------|
| TGACAGTC db/db2 | db/db | 915  | 0.027758 | FALSE | 1.099192 | FALSE | Photoreceptor          |
| TGACAGTC db/db2 | db/db | 317  | 0.014151 | FALSE | 4.561047 | FALSE | Endothelia Capillary E |
| TGACGCG db/db2  | db/db | 7744 | 0.027273 | FALSE | 0.874141 | FALSE | Photoreceptor          |
| TGACGCG db/db2  | db/db | 1941 | 0.013074 | FALSE | 0.977887 | FALSE | Endothelia Capillary E |
| TGACGCG db/db2  | db/db | 7572 | 0.023266 | FALSE | 0.874246 | FALSE | Photoreceptor          |
| TGACGCG db/db2  | db/db | 5298 | 0.058205 | FALSE | 0.993874 | FALSE | Endothelia Venous EC   |
| TGACGCG db/db2  | db/db | 3132 | 0.013074 | FALSE | 1.077121 | FALSE | Endothelia Capillary E |
| TGACGCG db/db2  | db/db | 4256 | 0.01981  | FALSE | 0.51374  | FALSE | Photoreceptor          |
| TGACGCG db/db2  | db/db | 7712 | 0.049679 | FALSE | 0.76141  | FALSE | Photoreceptor          |
| TGACGCG db/db2  | db/db | 1601 | 0.021669 | FALSE | 0.548753 | FALSE | Photoreceptor          |
| TGACGCG db/db2  | db/db | 2922 | 0.024105 | FALSE | 1.03327  | FALSE | Endothelia EC-C4       |
| TGACGCG db/db2  | db/db | 4388 | 0.038251 | FALSE | 0.868598 | FALSE | Photoreceptor          |
| TGACGCG db/db2  | db/db | 1591 | 0.067388 | FALSE | 1.200387 | FALSE | Photoreceptor          |
| TGACGCG db/db2  | db/db | 783  | 0.08663  | FALSE | 0.545635 | FALSE | Photoreceptor          |
| TGACGCG db/db2  | db/db | 1012 | 0.019455 | FALSE | 0.390972 | FALSE | Photoreceptor          |
| TGACGCG db/db2  | db/db | 380  | 0.04192  | FALSE | 4.593651 | FALSE | Muller cell            |
| TGACTCCC db/db2 | db/db | 2368 | 0.025868 | FALSE | 1.890343 | FALSE | Endothelia Capillary E |
| TGACTCCC db/db2 | db/db | 697  | 0.038251 | FALSE | 2.959322 | FALSE | Endothelia Capillary E |
| TGACTCCC db/db2 | db/db | 1188 | 0.078788 | FALSE | 7.979936 | TRUE  |                        |
| TGACTCCC db/db2 | db/db | 2801 | 0.040404 | FALSE | 1.245411 | FALSE | Endothelia Capillary E |
| TGACTCCC db/db2 | db/db | 1086 | 0.033726 | FALSE | 1.611249 | FALSE | Photoreceptor          |
| TGACTCCC db/db2 | db/db | 780  | 0.012557 | FALSE | 2.821496 | FALSE | Endothelia Capillary E |
| TGACTCCT db/db2 | db/db | 1476 | 0.041154 | FALSE | 1.936043 | FALSE | Photoreceptor          |
| TGAGACT db/db2  | db/db | 3596 | 0.025416 | FALSE | 1.168316 | FALSE | Endothelia Capillary E |
| TGAGACT db/db2  | db/db | 1542 | 0.04192  | FALSE | 2.230219 | FALSE | Photoreceptor          |
| TGAGACT db/db2  | db/db | 6307 | 0.044326 | FALSE | 1.091367 | FALSE | Photoreceptor          |
| TGAGACT db/db2  | db/db | 1365 | 0.048732 | FALSE | 1.95505  | FALSE | Muller cell            |
| TGAGACT db/db2  | db/db | 6479 | 0.026328 | FALSE | 0.901611 | FALSE | Photoreceptor          |
| TGAGACT db/db2  | db/db | 925  | 0.059406 | FALSE | 0.829675 | FALSE | Photoreceptor          |
| TGAGCAT db/db2  | db/db | 1712 | 0.042704 | FALSE | 0.920021 | FALSE | Photoreceptor          |
| TGAGCAT db/db2  | db/db | 2904 | 0.057037 | FALSE | 0.860025 | FALSE | Photoreceptor          |
| TGAGCAT db/db2  | db/db | 855  | 0.023266 | FALSE | 0.904301 | FALSE | Photoreceptor          |
| TGAGCAT db/db2  | db/db | 5233 | 0.029787 | FALSE | 0.950066 | FALSE | Endothelia Venous EC   |
| TGAGCAT db/db2  | db/db | 727  | 0.046025 | FALSE | 0.719975 | FALSE | Photoreceptor          |
| TGAGCAT db/db2  | db/db | 3352 | 0.038251 | FALSE | 0.643588 | FALSE | Photoreceptor          |
| TGAGCGC db/db2  | db/db | 533  | 0.034954 | FALSE | 44.66403 | TRUE  |                        |
| TGAGCGC db/db2  | db/db | 3257 | 0.015581 | FALSE | 1.103445 | FALSE | Endothelia Aterial EC  |
| TGAGCGC db/db2  | db/db | 3148 | 0.036891 | FALSE | 1.32825  | FALSE | Endothelia EC-C4       |
| TGAGGAG db/db2  | db/db | 2762 | 0.004275 | FALSE | 1.034826 | FALSE | Neuron                 |
| TGAGGAG db/db2  | db/db | 1373 | 0.005958 | FALSE | 0.865343 | FALSE | Endothelia Capillary E |
| TGAGGAG db/db2  | db/db | 2759 | 0.003497 | FALSE | 1.044609 | FALSE | Neuron                 |
| TGAGGGA db/db2  | db/db | 619  | 0.009933 | FALSE | 2.989636 | FALSE | Photoreceptor          |
| TGAGGGA db/db2  | db/db | 2688 | 0.055901 | FALSE | 0.937487 | FALSE | Photoreceptor          |
| TGAGGGA db/db2  | db/db | 2235 | 0.018088 | FALSE | 0.725797 | FALSE | Endothelia EC-C4       |
| TGAGGTT db/db2  | db/db | 9279 | 0.022857 | FALSE | 0.673277 | FALSE | Photoreceptor          |
| TGAGGTT db/db2  | db/db | 937  | 0.024971 | FALSE | 0.382608 | FALSE | Photoreceptor          |
| TGAGGTT db/db2  | db/db | 3347 | 0.012814 | FALSE | 1.134586 | FALSE | Endothelia Venous EC   |

|                 |       |      |          |       |          |       |                        |
|-----------------|-------|------|----------|-------|----------|-------|------------------------|
| TGAGGTT db/db2  | db/db | 946  | 0.076994 | FALSE | 1.735154 | FALSE | Photoreceptor          |
| TGAGTCA db/db2  | db/db | 2374 | 0.098234 | FALSE | 1.645422 | FALSE | Photoreceptor          |
| TGAGTCA db/db2  | db/db | 3862 | 0.065957 | FALSE | 0.812181 | FALSE | Neuron                 |
| TGAGTCA db/db2  | db/db | 559  | 0.08663  | FALSE | 3.590026 | FALSE | Muller cell            |
| TGATCAG db/db2  | db/db | 5148 | 0.014429 | FALSE | 0.882353 | FALSE | Endothelia EC-C4       |
| TGATCAG db/db2  | db/db | 923  | 0.025416 | FALSE | 2.169224 | FALSE | Photoreceptor          |
| TGATCAG db/db2  | db/db | 5341 | 0.037564 | FALSE | 1.149517 | FALSE | Endothelia Venous EC   |
| TGATCTTA db/db2 | db/db | 6824 | 0.023682 | FALSE | 0.801282 | FALSE | Photoreceptor          |
| TGATCTTC db/db2 | db/db | 455  | 0.08663  | FALSE | 38.92157 | TRUE  |                        |
| TGATCTTC db/db2 | db/db | 3242 | 0.020171 | FALSE | 0.66982  | FALSE | Endothelia EC-C4       |
| TGATCTTC db/db2 | db/db | 1070 | 0.058205 | FALSE | 17.66749 | TRUE  |                        |
| TGATGCA db/db2  | db/db | 4217 | 0.022455 | FALSE | 1.00267  | FALSE | Photoreceptor          |
| TGATGCA db/db2  | db/db | 457  | 0.073582 | FALSE | 4.647438 | FALSE | Muller cell            |
| TGATGCA db/db2  | db/db | 6304 | 0.061912 | FALSE | 0.817083 | FALSE | Endothelia EC-C4       |
| TGATGGT db/db2  | db/db | 4249 | 0.014997 | FALSE | 0.981194 | FALSE | Endothelia Venous EC   |
| TGATGGT db/db2  | db/db | 4639 | 0.047807 | FALSE | 1.075338 | FALSE | Endothelia EC-C4       |
| TGATGGT db/db2  | db/db | 4546 | 0.024105 | FALSE | 1.037147 | FALSE | Endothelia Venous EC   |
| TGATTCTC db/db2 | db/db | 2180 | 0.031411 | FALSE | 0.639459 | FALSE | Photoreceptor          |
| TGATTCTC db/db2 | db/db | 800  | 0.031973 | FALSE | 1.105304 | FALSE | Photoreceptor          |
| TGATTCTG db/db2 | db/db | 1181 | 0.016799 | FALSE | 0.144562 | FALSE | Photoreceptor          |
| TGATTCTT db/db2 | db/db | 283  | 0.038251 | FALSE | 2.560292 | FALSE | Microglia              |
| TGATTTCA db/db2 | db/db | 3294 | 0.014711 | FALSE | 0.884024 | FALSE | Endothelia Venous EC   |
| TGCACGG db/db2  | db/db | 3369 | 0.045165 | FALSE | 1.50583  | FALSE | Photoreceptor          |
| TGCACGG db/db2  | db/db | 558  | 0.021669 | FALSE | 4.181386 | FALSE | Muller cell            |
| TGCACGG db/db2  | db/db | 528  | 0.115723 | TRUE  | 17.36111 | TRUE  |                        |
| TGCAGAT db/db2  | db/db | 2750 | 0.017758 | FALSE | 0.941241 | FALSE | Endothelia EC-C4       |
| TGCAGAT db/db2  | db/db | 2639 | 0.038953 | FALSE | 1.047152 | FALSE | Endothelia EC-C4       |
| TGCAGGC db/db2  | db/db | 1242 | 0.013338 | FALSE | 1.457332 | FALSE | Endothelia Aterial EC  |
| TGCAGGC db/db2  | db/db | 2410 | 0.015581 | FALSE | 1.08471  | FALSE | Endothelia Capillary E |
| TGCAGGC db/db2  | db/db | 2480 | 0.04192  | FALSE | 0.560673 | FALSE | Photoreceptor          |
| TGCAGGC db/db2  | db/db | 1458 | 0.027758 | FALSE | 1.429528 | FALSE | Endothelia Capillary E |
| TGCAGTA db/db2  | db/db | 4276 | 0.018761 | FALSE | 0.805639 | FALSE | Photoreceptor          |
| TGCATCCA db/db2 | db/db | 355  | 0.109795 | TRUE  | 3.67893  | FALSE |                        |
| TGCATCCG db/db2 | db/db | 456  | 0.012052 | FALSE | 3.529677 | FALSE | Photoreceptor          |
| TGCATCCT db/db2 | db/db | 2187 | 0.040404 | FALSE | 1.604087 | FALSE | Endothelia Capillary E |
| TGCATGAC db/db2 | db/db | 799  | 0.031973 | FALSE | 2.348823 | FALSE | Photoreceptor          |
| TGCATGAC db/db2 | db/db | 2352 | 0.011081 | FALSE | 1.186278 | FALSE | Endothelia Aterial EC  |
| TGCCGAG db/db2  | db/db | 2983 | 0.029266 | FALSE | 1.328094 | FALSE | Endothelia Capillary E |
| TGCGACG db/db2  | db/db | 4750 | 0.05065  | FALSE | 1.277488 | FALSE | Photoreceptor          |
| TGCGACG db/db2  | db/db | 7681 | 0.025868 | FALSE | 0.79901  | FALSE | Photoreceptor          |
| TGCGACG db/db2  | db/db | 6265 | 0.017114 | FALSE | 0.973969 | FALSE | Photoreceptor          |
| TGCGACG db/db2  | db/db | 475  | 0.061912 | FALSE | 51.81998 | TRUE  |                        |
| TGCGATA db/db2  | db/db | 156  | 0.022059 | FALSE | 74.21875 | TRUE  |                        |
| TGCGATAC db/db2 | db/db | 8367 | 0.022059 | FALSE | 0.691408 | FALSE | Photoreceptor          |
| TGCGATAC db/db2 | db/db | 6511 | 0.020171 | FALSE | 0.877283 | FALSE | Photoreceptor          |
| TGCGGCA db/db2  | db/db | 493  | 0.082569 | FALSE | 3.728516 | FALSE | Muller cell            |
| TGCGGCA db/db2  | db/db | 2048 | 0.075259 | FALSE | 1.849719 | FALSE | Photoreceptor          |

|          |        |       |      |          |       |          |       |                        |
|----------|--------|-------|------|----------|-------|----------|-------|------------------------|
| TGCGGCA  | db/db2 | db/db | 2956 | 0.068864 | FALSE | 1.032493 | FALSE | Endothelia Capillary E |
| TGCGGCA  | db/db2 | db/db | 285  | 0.044326 | FALSE | 32.99799 | TRUE  |                        |
| TGCGGCA  | db/db2 | db/db | 1869 | 0.028251 | FALSE | 1.418971 | FALSE | Endothelia Capillary E |
| TGCGGGT  | db/db2 | db/db | 4042 | 0.03313  | FALSE | 1.040671 | FALSE | Photoreceptor          |
| TGCGGGT  | db/db2 | db/db | 236  | 0.020908 | FALSE | 67.50903 | TRUE  |                        |
| TGCGGGT  | db/db2 | db/db | 446  | 0.032546 | FALSE | 40.22039 | TRUE  |                        |
| TGCGGGT  | db/db2 | db/db | 1397 | 0.137569 | TRUE  | 4.331835 | FALSE |                        |
| TGCGGGT  | db/db2 | db/db | 4949 | 0.027273 | FALSE | 0.830676 | FALSE | Photoreceptor          |
| TGCTCCAA | db/db2 | db/db | 6717 | 0.030318 | FALSE | 0.882153 | FALSE | Photoreceptor          |
| TGCTCCAA | db/db2 | db/db | 7896 | 0.036891 | FALSE | 0.859221 | FALSE | Photoreceptor          |
| TGCTCCAC | db/db2 | db/db | 6300 | 0.014429 | FALSE | 0.853968 | FALSE | Endothelia EC-C4       |
| TGCTCCAT | db/db2 | db/db | 1823 | 0.042704 | FALSE | 0.988312 | FALSE | Photoreceptor          |
| TGCTCCAT | db/db2 | db/db | 337  | 0.053718 | FALSE | 3.649688 | FALSE | Microglia              |
| TGCTCGTA | db/db2 | db/db | 574  | 0.021286 | FALSE | 1.010069 | FALSE | Endothelia Capillary E |
| TGCTCGTC | db/db2 | db/db | 2897 | 0.026328 | FALSE | 1.349948 | FALSE | Endothelia EC-C4       |
| TGCTCGTT | db/db2 | db/db | 2735 | 0.068864 | FALSE | 1.608731 | FALSE | Photoreceptor          |
| TGCTGAA  | db/db2 | db/db | 3888 | 0.024534 | FALSE | 1.08903  | FALSE | Endothelia Venous EC   |
| TGCTGAAC | db/db2 | db/db | 2460 | 0.014997 | FALSE | 1.310588 | FALSE | Endothelia Capillary E |
| TGCTGAAC | db/db2 | db/db | 9906 | 0.01981  | FALSE | 0.444453 | FALSE | Photoreceptor          |
| TGCTGAAC | db/db2 | db/db | 935  | 0.045165 | FALSE | 3.824547 | FALSE | Photoreceptor          |
| TGCTTCGA | db/db2 | db/db | 940  | 0.028251 | FALSE | 3.405957 | FALSE | Muller cell            |
| TGCTTCGA | db/db2 | db/db | 4659 | 0.073582 | FALSE | 1.153326 | FALSE | Photoreceptor          |
| TGCTTCGA | db/db2 | db/db | 1390 | 0.075259 | FALSE | 0.852211 | FALSE | Photoreceptor          |
| TGCTTCGA | db/db2 | db/db | 212  | 0.021669 | FALSE | 70.45977 | TRUE  |                        |
| TGCTTCGA | db/db2 | db/db | 644  | 0.064568 | FALSE | 0.690223 | FALSE | Photoreceptor          |
| TGCTTCGC | db/db2 | db/db | 982  | 0.143776 | TRUE  | 3.001501 | FALSE |                        |
| TGCTTCGC | db/db2 | db/db | 7104 | 0.03313  | FALSE | 0.867423 | FALSE | Photoreceptor          |
| TGCTTCGC | db/db2 | db/db | 392  | 0.018088 | FALSE | 2.669426 | FALSE | Muller cell            |
| TGCTTCGC | db/db2 | db/db | 439  | 0.033726 | FALSE | 38.50051 | TRUE  |                        |
| TGCTTCGT | db/db2 | db/db | 5660 | 0.018761 | FALSE | 0.714122 | FALSE | Photoreceptor          |
| TGCTTGCA | db/db2 | db/db | 2563 | 0.014711 | FALSE | 1.094738 | FALSE | Endothelia Venous EC   |
| TGCTTGCT | db/db2 | db/db | 6453 | 0.019106 | FALSE | 1.033319 | FALSE | Photoreceptor          |
| TGGAACT  | db/db2 | db/db | 5465 | 0.022059 | FALSE | 0.673703 | FALSE | Photoreceptor          |
| TGGAACT  | db/db2 | db/db | 2065 | 0.070386 | FALSE | 1.405353 | FALSE | Endothelia Capillary E |
| TGGAGAG  | db/db2 | db/db | 5853 | 0.022059 | FALSE | 0.851664 | FALSE | Photoreceptor          |
| TGGAGAG  | db/db2 | db/db | 926  | 0.065957 | FALSE | 1.038036 | FALSE | Photoreceptor          |
| TGGAGAG  | db/db2 | db/db | 1392 | 0.045165 | FALSE | 2.359988 | FALSE | Muller cell            |
| TGGAGGA  | db/db2 | db/db | 1734 | 0.034954 | FALSE | 1.802371 | FALSE | Endothelia EC-C4       |
| TGGATCA  | db/db2 | db/db | 2016 | 0.126437 | TRUE  | 3.091961 | FALSE |                        |
| TGGATCA  | db/db2 | db/db | 2900 | 0.029266 | FALSE | 1.577591 | FALSE | Endothelia Capillary E |
| TGGATCA  | db/db2 | db/db | 8188 | 0.020171 | FALSE | 0.299496 | FALSE | Photoreceptor          |
| TGGATGT  | db/db2 | db/db | 232  | 0.014997 | FALSE | 60.42857 | TRUE  |                        |
| TGGATGT  | db/db2 | db/db | 403  | 0.137569 | TRUE  | 0.8726   | FALSE |                        |
| TGGATGT  | db/db2 | db/db | 3350 | 0.53202  | TRUE  | 4.625528 | FALSE |                        |
| TGGATGT  | db/db2 | db/db | 637  | 0.03313  | FALSE | 0.688921 | FALSE | Photoreceptor          |
| TGGCGTG  | db/db2 | db/db | 4646 | 0.064568 | FALSE | 0.806211 | FALSE | Photoreceptor          |
| TGGCGTG  | db/db2 | db/db | 3763 | 0.008852 | FALSE | 1.257905 | FALSE | Photoreceptor          |

|                |       |      |          |       |          |       |                        |
|----------------|-------|------|----------|-------|----------|-------|------------------------|
| TGGGAAG db/db2 | db/db | 456  | 0.028754 | FALSE | 2.648861 | FALSE | Pericyte               |
| TGGGAAG db/db2 | db/db | 563  | 0.038953 | FALSE | 1.978719 | FALSE | Endothelia Capillary E |
| TGGGAAG db/db2 | db/db | 3296 | 0.019455 | FALSE | 1.19167  | FALSE | Endothelia Venous EC   |
| TGGGAAG db/db2 | db/db | 1520 | 0.060641 | FALSE | 3.057769 | FALSE | Muller cell            |
| TGGGAAG db/db2 | db/db | 825  | 0.054795 | FALSE | 4.457304 | FALSE | Muller cell            |
| TGGGAAG db/db2 | db/db | 991  | 0.034334 | FALSE | 1.764591 | FALSE | Photoreceptor          |
| TGGGAAG db/db2 | db/db | 4608 | 0.058205 | FALSE | 1.043315 | FALSE | Endothelia Venous EC   |
| TGGGAGA db/db2 | db/db | 3274 | 0.060641 | FALSE | 0.805171 | FALSE | Photoreceptor          |
| TGGGATT db/db2 | db/db | 2717 | 0.039671 | FALSE | 0.853603 | FALSE | Endothelia EC-C4       |
| TGGGATT db/db2 | db/db | 4762 | 0.007636 | FALSE | 1.397251 | FALSE | Photoreceptor          |
| TGGGATT db/db2 | db/db | 4767 | 0.130374 | TRUE  | 8.236414 | TRUE  |                        |
| TGGGCGT db/db2 | db/db | 490  | 0.119568 | TRUE  | 0.480769 | FALSE |                        |
| TGGGCGT db/db2 | db/db | 2424 | 0.042704 | FALSE | 1.084286 | FALSE | Photoreceptor          |
| TGGGCGT db/db2 | db/db | 4432 | 0.022455 | FALSE | 0.893632 | FALSE | Endothelia EC-C4       |
| TGGGCGT db/db2 | db/db | 7484 | 0.020536 | FALSE | 0.861302 | FALSE | Photoreceptor          |
| TGGGCGT db/db2 | db/db | 4702 | 0.029266 | FALSE | 0.925126 | FALSE | Endothelia EC-C4       |
| TGGGCGT db/db2 | db/db | 4454 | 0.024971 | FALSE | 1.018732 | FALSE | Endothelia Venous EC   |
| TGGGCTG db/db2 | db/db | 7647 | 0.020536 | FALSE | 0.784541 | FALSE | Photoreceptor          |
| TGGGCTG db/db2 | db/db | 374  | 0.04192  | FALSE | 4.116684 | FALSE | Photoreceptor          |
| TGGGCTG db/db2 | db/db | 2464 | 0.101906 | TRUE  | 2.124892 | FALSE |                        |
| TGGGCTG db/db2 | db/db | 1839 | 0.071958 | FALSE | 2.212749 | FALSE | Muller cell            |
| TGGGCTG db/db2 | db/db | 4567 | 0.015287 | FALSE | 1.284247 | FALSE | Endothelia Capillary E |
| TGGGTTA db/db2 | db/db | 6164 | 0.033726 | FALSE | 0.885134 | FALSE | Endothelia Venous EC   |
| TGGGTTA db/db2 | db/db | 491  | 0.014711 | FALSE | 3.294974 | FALSE | Endothelia Capillary E |
| TGGGTTA db/db2 | db/db | 416  | 0.041154 | FALSE | 3.891784 | FALSE | Muller cell            |
| TGGGTTA db/db2 | db/db | 972  | 0.05065  | FALSE | 40.15152 | TRUE  |                        |
| TGGTACA db/db2 | db/db | 395  | 0.055901 | FALSE | 26.71875 | TRUE  |                        |
| TGGTACA db/db2 | db/db | 6411 | 0.023266 | FALSE | 0.912942 | FALSE | Photoreceptor          |
| TGGTACA db/db2 | db/db | 477  | 0.019106 | FALSE | 3.27285  | FALSE | Endothelia Capillary E |
| TGGTAGT db/db2 | db/db | 433  | 0.334395 | TRUE  | 7.075471 | TRUE  |                        |
| TGGTAGT db/db2 | db/db | 1151 | 0.045165 | FALSE | 1.517607 | FALSE | Photoreceptor          |
| TGGTAGT db/db2 | db/db | 365  | 0.063221 | FALSE | 3.561225 | FALSE | Muller cell            |
| TGGTAGT db/db2 | db/db | 666  | 0.078788 | FALSE | 4.486066 | FALSE | Muller cell            |
| TGGTAGT db/db2 | db/db | 2317 | 0.008852 | FALSE | 1.100602 | FALSE | Endothelia EC-C4       |
| TGGTAGT db/db2 | db/db | 3001 | 0.028754 | FALSE | 1.09015  | FALSE | Endothelia Capillary E |
| TGGTGAT db/db2 | db/db | 3844 | 0.095727 | FALSE | 1.661999 | FALSE | Endothelia Capillary E |
| TGGTGAT db/db2 | db/db | 6597 | 0.034954 | FALSE | 0.992111 | FALSE | Endothelia Venous EC   |
| TGGTTAG db/db2 | db/db | 1325 | 0.055901 | FALSE | 1.283237 | FALSE | Photoreceptor          |
| TGGTTAG db/db2 | db/db | 1611 | 0.076994 | FALSE | 1.666664 | FALSE | Photoreceptor          |
| TGGTTAG db/db2 | db/db | 678  | 0.041154 | FALSE | 3.190737 | FALSE | Pericyte               |
| TGGTTAG db/db2 | db/db | 530  | 0.024105 | FALSE | 47.67442 | TRUE  |                        |
| TGGTTAG db/db2 | db/db | 2891 | 0.017434 | FALSE | 1.579666 | FALSE | Photoreceptor          |
| TGGTTAG db/db2 | db/db | 1906 | 0.016799 | FALSE | 1.091587 | FALSE | Endothelia Capillary E |
| TGTAACG db/db2 | db/db | 3951 | 0.143501 | TRUE  | 6.347457 | TRUE  |                        |
| TGTAACG db/db2 | db/db | 872  | 0.053718 | FALSE | 2.047953 | FALSE | Endothelia Capillary E |
| TGTAAGC db/db2 | db/db | 2484 | 0.068864 | FALSE | 1.478882 | FALSE | Endothelia Capillary E |
| TGTAAGC db/db2 | db/db | 3602 | 0.015581 | FALSE | 1.268014 | FALSE | Endothelia EC-C4       |



|                 |       |      |          |       |          |       |                        |
|-----------------|-------|------|----------|-------|----------|-------|------------------------|
| TGTAAGCT db/db2 | db/db | 3203 | 0.019106 | FALSE | 0.971119 | FALSE | Neuron                 |
| TGTAAGCT db/db2 | db/db | 652  | 0.314286 | TRUE  | 24.19643 | TRUE  |                        |
| TGTAAGCT db/db2 | db/db | 6774 | 0.095727 | FALSE | 0.932122 | FALSE | Photoreceptor          |
| TGTACAG db/db2  | db/db | 2791 | 0.148319 | TRUE  | 1.663943 | FALSE |                        |
| TGTACAG db/db2  | db/db | 9967 | 0.058205 | FALSE | 0.636982 | FALSE | Photoreceptor          |
| TGTACAG db/db2  | db/db | 316  | 0.020171 | FALSE | 56.29139 | TRUE  |                        |
| TGTACAG db/db2  | db/db | 1571 | 0.017114 | FALSE | 1.37595  | FALSE | Endothelia Capillary E |
| TGTACAG db/db2  | db/db | 2729 | 0.037564 | FALSE | 1.983182 | FALSE | Neuron                 |
| TGTACAG db/db2  | db/db | 973  | 0.04192  | FALSE | 19.11691 | TRUE  |                        |
| TGTAGAC db/db2  | db/db | 366  | 0.05065  | FALSE | 30.1391  | TRUE  |                        |
| TGTAGAC db/db2  | db/db | 426  | 0.035586 | FALSE | 25.31121 | TRUE  |                        |
| TGTAGAC db/db2  | db/db | 3701 | 0.037564 | FALSE | 1.243222 | FALSE | Photoreceptor          |
| TGTAGAC db/db2  | db/db | 407  | 0.017434 | FALSE | 49.22929 | TRUE  |                        |
| TGTAGAC db/db2  | db/db | 788  | 0.01981  | FALSE | 1.643501 | FALSE | Microglia              |
| TGTAGAC db/db2  | db/db | 743  | 0.024534 | FALSE | 0.772036 | FALSE | Photoreceptor          |
| TGTAGAC db/db2  | db/db | 3454 | 0.030859 | FALSE | 0.942202 | FALSE | Endothelia EC-C4       |
| TGTCAGA db/db2  | db/db | 558  | 0.022857 | FALSE | 2.498757 | FALSE | Photoreceptor          |
| TGTCAGA db/db2  | db/db | 929  | 0.040404 | FALSE | 0.761811 | FALSE | Photoreceptor          |
| TGTCAGA db/db2  | db/db | 687  | 0.015581 | FALSE | 0.455889 | FALSE | Photoreceptor          |
| TGTCCACC db/db2 | db/db | 3051 | 0.057037 | FALSE | 1.458849 | FALSE | Endothelia Venous EC   |
| TGTCCCAT db/db2 | db/db | 3624 | 0.028754 | FALSE | 1.070286 | FALSE | Endothelia Capillary E |
| TGTCCTGA db/db2 | db/db | 5156 | 0.010384 | FALSE | 0.673664 | FALSE | Endothelia EC-C4       |
| TGTCCTGC db/db2 | db/db | 1093 | 0.042704 | FALSE | 1.578808 | FALSE | Photoreceptor          |
| TGTGAGT db/db2  | db/db | 5427 | 0.032546 | FALSE | 0.96851  | FALSE | Endothelia Venous EC   |
| TGTGAGT db/db2  | db/db | 187  | 0.016488 | FALSE | 78.16327 | TRUE  |                        |
| TGTGAGT db/db2  | db/db | 430  | 0.028251 | FALSE | 3.056652 | FALSE | Endothelia Capillary E |
| TGTGAGT db/db2  | db/db | 3070 | 0.021286 | FALSE | 1.145513 | FALSE | Endothelia Capillary E |
| TGTGATG db/db2  | db/db | 712  | 0.048732 | FALSE | 3.956592 | FALSE | Muller cell            |
| TGTGATG db/db2  | db/db | 6621 | 0.041154 | FALSE | 0.965849 | FALSE | Photoreceptor          |
| TGTGATG db/db2  | db/db | 449  | 0.08663  | FALSE | 3.934958 | FALSE | Muller cell            |
| TGTGATG db/db2  | db/db | 908  | 0.031411 | FALSE | 3.72274  | FALSE | Photoreceptor          |
| TGTGATG db/db2  | db/db | 2609 | 0.027273 | FALSE | 1.870697 | FALSE | Endothelia Aterial EC  |
| TGTGCGG db/db2  | db/db | 2059 | 0.013605 | FALSE | 1.507411 | FALSE | Endothelia Capillary E |
| TGTGGCG db/db2  | db/db | 3154 | 0.011319 | FALSE | 1.295906 | FALSE | Endothelia Capillary E |
| TGTGGCG db/db2  | db/db | 191  | 0.109795 | TRUE  | 0.118168 | FALSE |                        |
| TGTGGCG db/db2  | db/db | 561  | 0.042704 | FALSE | 17.61298 | TRUE  |                        |
| TGTGTGA db/db2  | db/db | 6633 | 0.112477 | TRUE  | 2.647112 | FALSE |                        |
| TGTGTGA db/db2  | db/db | 3937 | 0.024105 | FALSE | 0.750925 | FALSE | Photoreceptor          |
| TGTGTGA db/db2  | db/db | 896  | 0.032546 | FALSE | 2.420787 | FALSE | Photoreceptor          |
| TGTGTGA db/db2  | db/db | 2704 | 0.011319 | FALSE | 1.00218  | FALSE | Endothelia EC-C4       |
| TGTGTGA db/db2  | db/db | 2076 | 0.045165 | FALSE | 1.634625 | FALSE | Photoreceptor          |
| TGTGTGA db/db2  | db/db | 994  | 0.080645 | FALSE | 2.250707 | FALSE | Muller cell            |
| TGTGTGA db/db2  | db/db | 644  | 0.027758 | FALSE | 2.459012 | FALSE | Photoreceptor          |
| TGTTACTA db/db2 | db/db | 1610 | 0.012303 | FALSE | 1.361892 | FALSE | Endothelia Capillary E |
| TGTTACTC db/db2 | db/db | 4887 | 0.057037 | FALSE | 1.072561 | FALSE | Endothelia EC-C4       |
| TGTTACTG db/db2 | db/db | 5437 | 0.17103  | TRUE  | 7.660543 | TRUE  |                        |
| TGTTACTT db/db2 | db/db | 1581 | 0.025416 | FALSE | 1.252082 | FALSE | Endothelia Capillary E |

|                  |       |      |          |       |          |       |                        |
|------------------|-------|------|----------|-------|----------|-------|------------------------|
| TGTTTCATA db/db2 | db/db | 6271 | 0.032546 | FALSE | 0.739318 | FALSE | Photoreceptor          |
| TGTTTCATA db/db2 | db/db | 799  | 0.052669 | FALSE | 1.501366 | FALSE | Photoreceptor          |
| TGTTTCATC db/db2 | db/db | 5115 | 0.057037 | FALSE | 1.084629 | FALSE | Photoreceptor          |
| TGTTTCATC db/db2 | db/db | 741  | 0.025416 | FALSE | 0.122477 | FALSE | Photoreceptor          |
| TGTTTCATT db/db2 | db/db | 2287 | 0.058205 | FALSE | 2.836976 | FALSE | Muller cell            |
| TGTTCTAG db/db2  | db/db | 2320 | 0.024534 | FALSE | 0.702969 | FALSE | Photoreceptor          |
| TGTTCTAG db/db2  | db/db | 351  | 0.038251 | FALSE | 27.45098 | TRUE  |                        |
| TGTTCTAT db/db2  | db/db | 346  | 0.064568 | FALSE | 30.56    | TRUE  |                        |
| TGTTGAG db/db2   | db/db | 376  | 0.025416 | FALSE | 3.170065 | FALSE | Endothelia Capillary E |
| TGTTGGAC db/db2  | db/db | 3926 | 0.023266 | FALSE | 0.981071 | FALSE | Endothelia EC-C4       |
| TGTTTGTA db/db2  | db/db | 1007 | 0.067388 | FALSE | 1.552918 | FALSE | Photoreceptor          |
| TGTTTGTA db/db2  | db/db | 1955 | 0.04192  | FALSE | 0.960005 | FALSE | Photoreceptor          |
| TGTTTGTA db/db2  | db/db | 2926 | 0.037564 | FALSE | 1.195897 | FALSE | Photoreceptor          |
| TGTTTGTC db/db2  | db/db | 6337 | 0.027273 | FALSE | 0.835712 | FALSE | Photoreceptor          |
| TGTTTGTC db/db2  | db/db | 1225 | 0.009063 | FALSE | 1.098099 | FALSE | Pericyte               |
| TGTTTGTT db/db2  | db/db | 1068 | 0.054795 | FALSE | 1.941752 | FALSE | Photoreceptor          |
| TTAATCCC db/db2  | db/db | 7411 | 0.025416 | FALSE | 0.889757 | FALSE | Photoreceptor          |
| TTAATCCG db/db2  | db/db | 526  | 0.016799 | FALSE | 0.633256 | FALSE | Photoreceptor          |
| TTAATCCG db/db2  | db/db | 1226 | 0.071958 | FALSE | 1.685041 | FALSE | Photoreceptor          |
| TTAATCCT db/db2  | db/db | 374  | 0.020171 | FALSE | 56.85484 | TRUE  |                        |
| TTACAGG db/db2   | db/db | 1540 | 0.013876 | FALSE | 1.308023 | FALSE | Endothelia Capillary E |
| TTACAGG db/db2   | db/db | 1890 | 0.015879 | FALSE | 1.217977 | FALSE | Endothelia EC-C4       |
| TTACAGGC db/db2  | db/db | 2383 | 0.093319 | FALSE | 1.888379 | FALSE | Photoreceptor          |
| TTACAGGC db/db2  | db/db | 988  | 0.051646 | FALSE | 2.522227 | FALSE | Muller cell            |
| TTACAGGC db/db2  | db/db | 333  | 0.046906 | FALSE | 4.271475 | FALSE | Pericyte               |
| TTACCATA db/db2  | db/db | 1004 | 0.070386 | FALSE | 1.462954 | FALSE | Photoreceptor          |
| TTACCATG db/db2  | db/db | 533  | 0.025868 | FALSE | 47.51634 | TRUE  |                        |
| TTACCATT db/db2  | db/db | 5115 | 0.016799 | FALSE | 0.891636 | FALSE | Photoreceptor          |
| TTACCGCA db/db2  | db/db | 5454 | 0.027758 | FALSE | 0.865242 | FALSE | Endothelia Venous EC   |
| TTACCGCA db/db2  | db/db | 1417 | 0.048732 | FALSE | 0.972723 | FALSE | Photoreceptor          |
| TTACCGCA db/db2  | db/db | 451  | 0.040404 | FALSE | 1.054187 | FALSE | Endothelia Capillary E |
| TTACCGCC db/db2  | db/db | 8180 | 0.026328 | FALSE | 0.895356 | FALSE | Photoreceptor          |
| TTACCGCC db/db2  | db/db | 4072 | 0.045165 | FALSE | 1.326351 | FALSE | Endothelia Venous EC   |
| TTACCGCC db/db2  | db/db | 1001 | 0.03313  | FALSE | 0.304782 | FALSE | Photoreceptor          |
| TTACCGCT db/db2  | db/db | 3502 | 0.016799 | FALSE | 0.506539 | FALSE | Photoreceptor          |
| TTACGCCA db/db2  | db/db | 2122 | 0.009712 | FALSE | 1.011841 | FALSE | Endothelia EC-C4       |
| TTACGCCA db/db2  | db/db | 1027 | 0.024105 | FALSE | 0.744199 | FALSE | Photoreceptor          |
| TTACGCCC db/db2  | db/db | 7298 | 0.218615 | TRUE  | 2.558918 | FALSE |                        |
| TTACGTTA db/db2  | db/db | 3599 | 0.013338 | FALSE | 1.151386 | FALSE | Endothelia Venous EC   |
| TTACTGTA db/db2  | db/db | 3240 | 0.052669 | FALSE | 1.137506 | FALSE | Photoreceptor          |
| TTACTGTA db/db2  | db/db | 6575 | 0.033726 | FALSE | 0.911901 | FALSE | Photoreceptor          |
| TTACTGTC db/db2  | db/db | 1963 | 0.007441 | FALSE | 0.860767 | FALSE | Endothelia EC-C4       |
| TTACTGTC db/db2  | db/db | 3469 | 0.011805 | FALSE | 1.336037 | FALSE | Photoreceptor          |
| TTACTGTC db/db2  | db/db | 4302 | 0.013876 | FALSE | 0.924047 | FALSE | Endothelia Venous EC   |
| TTACTGTG db/db2  | db/db | 479  | 0.022059 | FALSE | 1.175462 | FALSE | Photoreceptor          |
| TTACTGTG db/db2  | db/db | 729  | 0.098234 | FALSE | 11.56463 | TRUE  |                        |
| TTACTGTT db/db2  | db/db | 5070 | 0.036891 | FALSE | 1.055522 | FALSE | Photoreceptor          |

|                 |       |      |          |       |          |       |                        |
|-----------------|-------|------|----------|-------|----------|-------|------------------------|
| TACTGTT db/db2  | db/db | 430  | 0.055901 | FALSE | 1.068496 | FALSE | Endothelia Capillary E |
| TAGGCA db/db2   | db/db | 1075 | 0.015581 | FALSE | 1.450914 | FALSE | Endothelia Capillary E |
| TAGGCA db/db2   | db/db | 317  | 0.025416 | FALSE | 26.24255 | TRUE  |                        |
| TAGGCA db/db2   | db/db | 4656 | 0.025416 | FALSE | 0.947942 | FALSE | Photoreceptor          |
| TAGGCA db/db2   | db/db | 4739 | 0.029266 | FALSE | 0.754513 | FALSE | Photoreceptor          |
| TAGGCA db/db2   | db/db | 1083 | 0.022857 | FALSE | 0.533175 | FALSE | Photoreceptor          |
| TAGGGT db/db2   | db/db | 881  | 0.013338 | FALSE | 1.704716 | FALSE | Endothelia Capillary E |
| TAGGGT db/db2   | db/db | 1509 | 0.049679 | FALSE | 11.76651 | TRUE  |                        |
| TAGGGT db/db2   | db/db | 583  | 0.082569 | FALSE | 7.710558 | TRUE  |                        |
| TAGTCTA db/db2  | db/db | 357  | 0.03313  | FALSE | 33.33334 | TRUE  |                        |
| TAGTCT db/db2   | db/db | 356  | 0.047807 | FALSE | 32.27848 | TRUE  |                        |
| TAGTCT db/db2   | db/db | 4677 | 0.040404 | FALSE | 0.910798 | FALSE | Endothelia Venous EC   |
| TATTGCG db/db2  | db/db | 2395 | 0.024534 | FALSE | 1.332632 | FALSE | Endothelia Capillary E |
| TATTGCG db/db2  | db/db | 2090 | 0.060641 | FALSE | 1.499955 | FALSE | Endothelia Capillary E |
| TATTGCT db/db2  | db/db | 592  | 0.042704 | FALSE | 0.781866 | FALSE | Photoreceptor          |
| TATTGCT db/db2  | db/db | 6806 | 0.049679 | FALSE | 1.046887 | FALSE | Photoreceptor          |
| TATTGCT db/db2  | db/db | 489  | 0.048732 | FALSE | 0.892645 | FALSE | Photoreceptor          |
| TCAATCA db/db2  | db/db | 3085 | 0.015879 | FALSE | 1.317012 | FALSE | Endothelia Aterial EC  |
| TCAATCA db/db2  | db/db | 1757 | 0.020171 | FALSE | 1.526092 | FALSE | Endothelia Capillary E |
| TCAATCC db/db2  | db/db | 7877 | 0.022455 | FALSE | 0.816021 | FALSE | Photoreceptor          |
| TCAATCT db/db2  | db/db | 547  | 0.024105 | FALSE | 43.64821 | TRUE  |                        |
| TCACCGA db/db2  | db/db | 406  | 0.098234 | FALSE | 4.323345 | FALSE | Endothelia Capillary E |
| TCACCGC db/db2  | db/db | 5717 | 0.044326 | FALSE | 1.005234 | FALSE | Photoreceptor          |
| TCACCGC db/db2  | db/db | 1546 | 0.060641 | FALSE | 1.595051 | FALSE | Photoreceptor          |
| TCACCGC db/db2  | db/db | 4748 | 0.024534 | FALSE | 0.494823 | FALSE | Photoreceptor          |
| TCACCGT db/db2  | db/db | 1147 | 0.019106 | FALSE | 1.027879 | FALSE | Muller cell            |
| TCACCGT db/db2  | db/db | 5033 | 0.012814 | FALSE | 0.897429 | FALSE | Endothelia Venous EC   |
| TCACGCC db/db2  | db/db | 6566 | 0.042704 | FALSE | 0.875222 | FALSE | Endothelia Venous EC   |
| TCACGCC db/db2  | db/db | 744  | 0.012052 | FALSE | 1.431222 | FALSE | Endothelia Venous EC   |
| TCACGCT db/db2  | db/db | 526  | 0.030318 | FALSE | 49.17127 | TRUE  |                        |
| TCACGCT db/db2  | db/db | 1895 | 0.031973 | FALSE | 3.594273 | FALSE | Muller cell            |
| TCAGGA db/db2   | db/db | 4642 | 0.019455 | FALSE | 0.820546 | FALSE | Endothelia EC-C4       |
| TCAGGA db/db2   | db/db | 3426 | 0.038251 | FALSE | 1.398527 | FALSE | Endothelia Venous EC   |
| TCAGGA db/db2   | db/db | 1942 | 0.013605 | FALSE | 1.467683 | FALSE | Endothelia Capillary E |
| TCAGGA db/db2   | db/db | 7174 | 0.091004 | FALSE | 1.014606 | FALSE | Photoreceptor          |
| TCAGGA db/db2   | db/db | 1499 | 0.021669 | FALSE | 1.831866 | FALSE | Endothelia Capillary E |
| TCAGGA db/db2   | db/db | 2177 | 0.032546 | FALSE | 1.074944 | FALSE | Photoreceptor          |
| TCATTGA db/db2  | db/db | 6094 | 0.020908 | FALSE | 1.074639 | FALSE | Endothelia Venous EC   |
| TCATTGG db/db2  | db/db | 3018 | 0.009712 | FALSE | 0.233692 | FALSE | Photoreceptor          |
| TCATTGG db/db2  | db/db | 374  | 0.012052 | FALSE | 2.560621 | FALSE | Muller cell            |
| TCATTGG db/db2  | db/db | 531  | 0.035586 | FALSE | 3.670337 | FALSE | Muller cell            |
| TCATTGT db/db2  | db/db | 5893 | 0.022857 | FALSE | 0.922012 | FALSE | Endothelia EC-C4       |
| TCATTGT db/db2  | db/db | 423  | 0.030859 | FALSE | 0        | FALSE | Photoreceptor          |
| TTCCAATA db/db2 | db/db | 856  | 0.075259 | FALSE | 2.826832 | FALSE | Endothelia Capillary E |
| TTCCAATA db/db2 | db/db | 3376 | 0.022857 | FALSE | 1.064546 | FALSE | Neuron                 |
| TTCCAATC db/db2 | db/db | 884  | 0.036232 | FALSE | 43.62606 | TRUE  |                        |
| TTCCAATG db/db2 | db/db | 3186 | 0.08663  | FALSE | 1.530533 | FALSE | Photoreceptor          |

|                 |       |      |          |       |          |       |                        |
|-----------------|-------|------|----------|-------|----------|-------|------------------------|
| TTCCACGA db/db2 | db/db | 4742 | 0.042704 | FALSE | 0.937314 | FALSE | Photoreceptor          |
| TTCCACGA db/db2 | db/db | 1118 | 0.067388 | FALSE | 12.75626 | TRUE  |                        |
| TTCCACGC db/db2 | db/db | 535  | 0.036232 | FALSE | 39.12    | TRUE  |                        |
| TTCCACGC db/db2 | db/db | 2479 | 0.018088 | FALSE | 1.103693 | FALSE | Endothelia Capillary E |
| TTCCACGC db/db2 | db/db | 4842 | 0.025868 | FALSE | 0.497142 | FALSE | Photoreceptor          |
| TTCCACGC db/db2 | db/db | 391  | 0.046025 | FALSE | 2.994593 | FALSE | Muller cell            |
| TTCCACGT db/db2 | db/db | 487  | 0.012303 | FALSE | 1.793756 | FALSE | Muller cell            |
| TTCCGGTA db/db2 | db/db | 1961 | 0.013605 | FALSE | 1.203692 | FALSE | Endothelia Capillary E |
| TTCCGGTC db/db2 | db/db | 5316 | 0.013605 | FALSE | 1.017998 | FALSE | Endothelia Venous EC   |
| TTCCGGTT db/db2 | db/db | 981  | 0.039671 | FALSE | 2.021011 | FALSE | Photoreceptor          |
| TTCCGTGT db/db2 | db/db | 2695 | 0.065957 | FALSE | 1.670367 | FALSE | Photoreceptor          |
| TTCCGTGT db/db2 | db/db | 4798 | 0.031973 | FALSE | 0.953159 | FALSE | Endothelia Venous EC   |
| TTCTAAA db/db2  | db/db | 727  | 0.05065  | FALSE | 3.823751 | FALSE | Muller cell            |
| TTCTAAC db/db2  | db/db | 410  | 0.034954 | FALSE | 1.394618 | FALSE | Photoreceptor          |
| TTCTAAC db/db2  | db/db | 628  | 0.020171 | FALSE | 2.275467 | FALSE | Photoreceptor          |
| TTCTAAG db/db2  | db/db | 2689 | 0.101025 | TRUE  | 1.924905 | FALSE |                        |
| TTCTAAG db/db2  | db/db | 1519 | 0.019106 | FALSE | 1.169813 | FALSE | Endothelia Capillary E |
| TTCTAAG db/db2  | db/db | 725  | 0.109375 | TRUE  | 7.342658 | TRUE  |                        |
| TTCTAAT db/db2  | db/db | 445  | 0.034954 | FALSE | 28.86978 | TRUE  |                        |
| TTCTCTA db/db2  | db/db | 2190 | 0.021669 | FALSE | 1.122696 | FALSE | Endothelia Capillary E |
| TTCTCTA db/db2  | db/db | 349  | 0.048732 | FALSE | 38.05436 | TRUE  |                        |
| TTCTCTA db/db2  | db/db | 1172 | 0.091004 | FALSE | 1.096725 | FALSE | Photoreceptor          |
| TTCTCTC db/db2  | db/db | 1156 | 0.030318 | FALSE | 4.132046 | FALSE | Muller cell            |
| TTCTCTG db/db2  | db/db | 6179 | 0.017758 | FALSE | 0.786661 | FALSE | Photoreceptor          |
| TTCTCTG db/db2  | db/db | 5051 | 0.025868 | FALSE | 0.698671 | FALSE | Photoreceptor          |
| TTCTCTG db/db2  | db/db | 3569 | 0.014711 | FALSE | 1.056685 | FALSE | Endothelia Capillary E |
| TTCTTCA db/db2  | db/db | 2403 | 0.023682 | FALSE | 0.74837  | FALSE | Photoreceptor          |
| TTCTTCA db/db2  | db/db | 1088 | 0.068864 | FALSE | 2.039382 | FALSE | Muller cell            |
| TTCTTCC db/db2  | db/db | 7211 | 0.025868 | FALSE | 0.710805 | FALSE | Photoreceptor          |
| TTCTTCG db/db2  | db/db | 3387 | 0.026328 | FALSE | 0.870104 | FALSE | Endothelia Capillary E |
| TTGATTA db/db2  | db/db | 2537 | 0.014711 | FALSE | 1.603703 | FALSE | Photoreceptor          |
| TTGATTA db/db2  | db/db | 2291 | 0.022455 | FALSE | 1.053109 | FALSE | Endothelia EC-C4       |
| TTGATTC db/db2  | db/db | 1764 | 0.068864 | FALSE | 1.822513 | FALSE | Endothelia Capillary E |
| TTGATTC db/db2  | db/db | 5721 | 0.019455 | FALSE | 0.642712 | FALSE | Photoreceptor          |
| TTGATTG db/db2  | db/db | 2213 | 0.024971 | FALSE | 1.16499  | FALSE | Endothelia Capillary E |
| TTGATTG db/db2  | db/db | 728  | 0.084562 | FALSE | 4.382883 | FALSE | Muller cell            |
| TTGATTG db/db2  | db/db | 595  | 0.040404 | FALSE | 37.09678 | TRUE  |                        |
| TTGCTGA db/db2  | db/db | 522  | 0.025868 | FALSE | 49.78567 | TRUE  |                        |
| TTGCTGC db/db2  | db/db | 348  | 0.033726 | FALSE | 52.31729 | TRUE  |                        |
| TTGCTGC db/db2  | db/db | 499  | 0.015287 | FALSE | 2.453191 | FALSE | Photoreceptor          |
| TTGCTGC db/db2  | db/db | 504  | 0.034954 | FALSE | 3.503004 | FALSE | Muller cell            |
| TTGCTGT db/db2  | db/db | 451  | 0.037564 | FALSE | 37.35374 | TRUE  |                        |
| TTCTAACA db/db2 | db/db | 1195 | 0.063221 | FALSE | 3.027504 | FALSE | Muller cell            |
| TTCTAACC db/db2 | db/db | 1581 | 0.040404 | FALSE | 1.469512 | FALSE | Photoreceptor          |
| TTCTAACC db/db2 | db/db | 4253 | 0.027273 | FALSE | 1.129052 | FALSE | Photoreceptor          |
| TTCTAACC db/db2 | db/db | 531  | 0.052669 | FALSE | 2.554765 | FALSE | Photoreceptor          |
| TTCTAACC db/db2 | db/db | 1678 | 0.029266 | FALSE | 1.638179 | FALSE | Photoreceptor          |

|                 |       |      |          |       |          |       |                        |
|-----------------|-------|------|----------|-------|----------|-------|------------------------|
| TTCTAACC db/db2 | db/db | 2502 | 0.05065  | FALSE | 1.312583 | FALSE | Photoreceptor          |
| TTCTAACC db/db2 | db/db | 2001 | 0.033726 | FALSE | 1.157715 | FALSE | Endothelia Capillary E |
| TTCTAACT db/db2 | db/db | 2341 | 0.022059 | FALSE | 0.936952 | FALSE | Photoreceptor          |
| TTCTAACT db/db2 | db/db | 5687 | 0.040404 | FALSE | 0.973814 | FALSE | Photoreceptor          |
| TTCTAACT db/db2 | db/db | 1244 | 0.044326 | FALSE | 2.00132  | FALSE | Photoreceptor          |
| TTCTAGTA db/db2 | db/db | 1232 | 0.036891 | FALSE | 1.216595 | FALSE | Photoreceptor          |
| TTCTAGTC db/db2 | db/db | 1659 | 0.015581 | FALSE | 1.328545 | FALSE | Endothelia Capillary E |
| TTCTAGTC db/db2 | db/db | 3233 | 0.01981  | FALSE | 1.03359  | FALSE | Endothelia Venous EC   |
| TTCTCTCA db/db2 | db/db | 5317 | 0.209157 | TRUE  | 3.702379 | FALSE |                        |
| TTCTCTCG db/db2 | db/db | 2424 | 0.012052 | FALSE | 0.308753 | FALSE | Photoreceptor          |
| TTCTGTAA db/db2 | db/db | 3632 | 0.046906 | FALSE | 1.262515 | FALSE | Photoreceptor          |
| TTCTGTAA db/db2 | db/db | 1478 | 0.020536 | FALSE | 0.411093 | FALSE | Photoreceptor          |
| TTCTGTAG db/db2 | db/db | 1218 | 0.012052 | FALSE | 1.920187 | FALSE | Endothelia Aterial EC  |
| TTCTGTAG db/db2 | db/db | 3768 | 0.020171 | FALSE | 1.017764 | FALSE | Photoreceptor          |
| TTCTGTAG db/db2 | db/db | 2902 | 0.042704 | FALSE | 1.220527 | FALSE | Endothelia EC-C4       |
| TTCTGTAT db/db2 | db/db | 574  | 0.040404 | FALSE | 52.08518 | TRUE  |                        |
| TTCTTCCC db/db2 | db/db | 1976 | 0.022857 | FALSE | 1.078739 | FALSE | Endothelia Capillary E |
| TTCTTCCG db/db2 | db/db | 8460 | 0.015879 | FALSE | 0.61487  | FALSE | Photoreceptor          |
| TTCTTCCG db/db2 | db/db | 2344 | 0.014151 | FALSE | 1.420514 | FALSE | Endothelia EC-C4       |
| TTCTTGAC db/db2 | db/db | 8861 | 0.019106 | FALSE | 0.711798 | FALSE | Photoreceptor          |
| TTCTTGAC db/db2 | db/db | 1808 | 0.015287 | FALSE | 1.493734 | FALSE | Endothelia Aterial EC  |
| TTCTTGAC db/db2 | db/db | 2252 | 0.016181 | FALSE | 1.119464 | FALSE | Endothelia EC-C4       |
| TTCTTGAC db/db2 | db/db | 468  | 0.010384 | FALSE | 0.531597 | FALSE | Endothelia Aterial EC  |
| TTCTTGAG db/db2 | db/db | 3454 | 0.042704 | FALSE | 0.883048 | FALSE | Endothelia EC-C4       |
| TTCTTGAT db/db2 | db/db | 3810 | 0.078788 | FALSE | 1.43687  | FALSE | Endothelia Capillary E |
| TTGAACG db/db2  | db/db | 3275 | 0.023266 | FALSE | 1.359524 | FALSE | Endothelia EC-C4       |
| TTGAACG db/db2  | db/db | 1877 | 0.071958 | FALSE | 0.805389 | FALSE | Photoreceptor          |
| TTGAACG db/db2  | db/db | 3078 | 0.118221 | TRUE  | 3.069658 | FALSE |                        |
| TTGAACG db/db2  | db/db | 770  | 0.014151 | FALSE | 0.359643 | FALSE | Photoreceptor          |
| TTGAACG db/db2  | db/db | 957  | 0.209157 | TRUE  | 12.921   | TRUE  |                        |
| TTGAACG db/db2  | db/db | 3273 | 0.048732 | FALSE | 1.398063 | FALSE | Photoreceptor          |
| TTGAACG db/db2  | db/db | 6942 | 0.112477 | TRUE  | 2.604838 | FALSE |                        |
| TTGACCCA db/db2 | db/db | 685  | 0.008438 | FALSE | 2.507179 | FALSE | Muller cell            |
| TTGACCCC db/db2 | db/db | 537  | 0.042704 | FALSE | 37.34835 | TRUE  |                        |
| TTGAGTG db/db2  | db/db | 1049 | 0.076994 | FALSE | 1.846317 | FALSE | Endothelia Capillary E |
| TTGAGTG db/db2  | db/db | 1683 | 0.020171 | FALSE | 0.451254 | FALSE | Endothelia Capillary E |
| TTGAGTG db/db2  | db/db | 388  | 0.071958 | FALSE | 1.605841 | FALSE | Endothelia Capillary E |
| TTGAGTG db/db2  | db/db | 1248 | 0.08663  | FALSE | 21.80075 | TRUE  |                        |
| TTGAGTG db/db2  | db/db | 3569 | 0.047807 | FALSE | 1.228541 | FALSE | Photoreceptor          |
| TTGAGTG db/db2  | db/db | 1981 | 0.058205 | FALSE | 1.105059 | FALSE | Neuron                 |
| TTGAGTG db/db2  | db/db | 2539 | 0.042704 | FALSE | 1.125996 | FALSE | Photoreceptor          |
| TTGATGG db/db2  | db/db | 3081 | 0.025416 | FALSE | 0.804681 | FALSE | Endothelia EC-C4       |
| TTGATGG db/db2  | db/db | 2633 | 0.014429 | FALSE | 1.197776 | FALSE | Endothelia Aterial EC  |
| TTGATGG db/db2  | db/db | 7283 | 0.038251 | FALSE | 0.932864 | FALSE | Endothelia Venous EC   |
| TTGCATTA db/db2 | db/db | 966  | 0.049679 | FALSE | 0.998785 | FALSE | Photoreceptor          |
| TTGCATTG db/db2 | db/db | 4703 | 0.03313  | FALSE | 0.875371 | FALSE | Photoreceptor          |
| TTGCATTG db/db2 | db/db | 5592 | 0.053718 | FALSE | 1.034169 | FALSE | Photoreceptor          |

|                 |       |      |          |       |          |       |                        |
|-----------------|-------|------|----------|-------|----------|-------|------------------------|
| TTGCATTT db/db2 | db/db | 1861 | 0.049679 | FALSE | 1.786074 | FALSE | Endothelia Venous EC   |
| TTGCCTGC db/db2 | db/db | 8044 | 0.021286 | FALSE | 0.789527 | FALSE | Photoreceptor          |
| TTGCCTGT db/db2 | db/db | 2762 | 0.060641 | FALSE | 1.822774 | FALSE | Photoreceptor          |
| TTGCCTGT db/db2 | db/db | 4279 | 0.018422 | FALSE | 0.892195 | FALSE | Endothelia EC-C4       |
| TTGCGTCA db/db2 | db/db | 2828 | 0.022857 | FALSE | 1.092193 | FALSE | Photoreceptor          |
| TTGCGTCC db/db2 | db/db | 1989 | 0.078788 | FALSE | 20.30025 | TRUE  |                        |
| TTGCGTCC db/db2 | db/db | 7057 | 0.063221 | FALSE | 1.623627 | FALSE | Neuron                 |
| TTGCGTCC db/db2 | db/db | 3766 | 0.036232 | FALSE | 1.225209 | FALSE | Photoreceptor          |
| TTGCGTCT db/db2 | db/db | 8873 | 0.016181 | FALSE | 0.765372 | FALSE | Photoreceptor          |
| TTGGATG db/db2  | db/db | 3024 | 0.020171 | FALSE | 1.372075 | FALSE | Endothelia Capillary E |
| TTGGATG db/db2  | db/db | 3804 | 0.064568 | FALSE | 1.008113 | FALSE | Photoreceptor          |
| TTGGATG db/db2  | db/db | 2569 | 0.033726 | FALSE | 0.865986 | FALSE | Photoreceptor          |
| TTGGATG db/db2  | db/db | 483  | 0.021669 | FALSE | 2.861678 | FALSE | Endothelia Capillary E |
| TTGGATG db/db2  | db/db | 4448 | 0.054795 | FALSE | 1.13145  | FALSE | Endothelia Venous EC   |
| TTGGATG db/db2  | db/db | 681  | 0.028251 | FALSE | 1.424291 | FALSE | Photoreceptor          |
| TTGGGATG db/db2 | db/db | 1305 | 0.038251 | FALSE | 1.281398 | FALSE | Photoreceptor          |
| TTGGGATG db/db2 | db/db | 6368 | 0.052669 | FALSE | 1.026273 | FALSE | Photoreceptor          |
| TTGGGATG db/db2 | db/db | 5768 | 0.020171 | FALSE | 1.016172 | FALSE | Photoreceptor          |
| TTGGGCG db/db2  | db/db | 724  | 0.016181 | FALSE | 2.501872 | FALSE | Endothelia Capillary E |
| TTGGGCG db/db2  | db/db | 2317 | 0.032546 | FALSE | 1.030642 | FALSE | Endothelia Capillary E |
| TTGGGCG db/db2  | db/db | 858  | 0.043505 | FALSE | 2.759429 | FALSE | Microglia              |
| TTGGGCG db/db2  | db/db | 7649 | 0.031411 | FALSE | 1.159705 | FALSE | Photoreceptor          |
| TTGGGCG db/db2  | db/db | 4460 | 0.016488 | FALSE | 1.054885 | FALSE | Endothelia Capillary E |
| TTGGGCG db/db2  | db/db | 235  | 0.034334 | FALSE | 56.1947  | TRUE  |                        |
| TTGGGTA db/db2  | db/db | 2398 | 0.159016 | TRUE  | 2.397313 | FALSE |                        |
| TTGGGTA db/db2  | db/db | 841  | 0.008032 | FALSE | 2.468789 | FALSE | Muller cell            |
| TTGGGTA db/db2  | db/db | 1886 | 0.065957 | FALSE | 0.897083 | FALSE | Neuron                 |
| TTGGGTA db/db2  | db/db | 2052 | 0.078788 | FALSE | 0.710846 | FALSE | Photoreceptor          |
| TTGGGTA db/db2  | db/db | 4703 | 0.045165 | FALSE | 1.090299 | FALSE | Photoreceptor          |
| TTGGTTTA db/db2 | db/db | 4392 | 0.046025 | FALSE | 0.796262 | FALSE | Endothelia Venous EC   |
| TTGGTTTC db/db2 | db/db | 1451 | 0.088776 | FALSE | 2.014351 | FALSE | Endothelia Capillary E |
| TTGGTTTC db/db2 | db/db | 948  | 0.032546 | FALSE | 1.140735 | FALSE | Photoreceptor          |
| TTGGTTTG db/db2 | db/db | 541  | 0.045165 | FALSE | 32.64166 | TRUE  |                        |
| TTGGTTTG db/db2 | db/db | 5598 | 0.03313  | FALSE | 0.901605 | FALSE | Endothelia Venous EC   |
| TTGGTTTT db/db2 | db/db | 2302 | 0.015879 | FALSE | 1.482193 | FALSE | Endothelia EC-C4       |
| TTGGTTTT db/db2 | db/db | 886  | 0.011081 | FALSE | 3.192886 | FALSE | Pericyte               |
| TTGGTTTT db/db2 | db/db | 1261 | 0.035586 | FALSE | 1.256286 | FALSE | Photoreceptor          |
| TTGGTTTT db/db2 | db/db | 1388 | 0.014429 | FALSE | 2.077632 | FALSE | Endothelia EC-C4       |
| TTGTGGA db/db2  | db/db | 970  | 0.218615 | TRUE  | 6.311208 | TRUE  |                        |
| TTGTGGA db/db2  | db/db | 1079 | 0.020908 | FALSE | 1.759976 | FALSE | Endothelia Capillary E |
| TTGTGGA db/db2  | db/db | 635  | 0.047807 | FALSE | 4.172131 | FALSE | Muller cell            |
| TTGTGGA db/db2  | db/db | 1133 | 0.049679 | FALSE | 1.872141 | FALSE | Photoreceptor          |
| TTGTGGA db/db2  | db/db | 2051 | 0.043505 | FALSE | 1.079337 | FALSE | Neuron                 |
| TTGTGTTA db/db2 | db/db | 1137 | 0.016799 | FALSE | 1.859174 | FALSE | Microglia              |
| TTGTGTTG db/db2 | db/db | 884  | 0.046906 | FALSE | 0.632261 | FALSE | Photoreceptor          |
| TTGTGTTT db/db2 | db/db | 1159 | 0.076994 | FALSE | 3.218895 | FALSE | Muller cell            |
| TTGTGTTT db/db2 | db/db | 5268 | 0.028251 | FALSE | 1.052869 | FALSE | Photoreceptor          |

|                 |       |       |          |       |          |       |                        |
|-----------------|-------|-------|----------|-------|----------|-------|------------------------|
| TTGTTCAg db/db2 | db/db | 4447  | 0.058205 | FALSE | 1.106585 | FALSE | Endothelia EC-C4       |
| TTGTTCAg db/db2 | db/db | 6662  | 0.024534 | FALSE | 0.859629 | FALSE | Photoreceptor          |
| TTGTTCAg db/db2 | db/db | 493   | 0.08663  | FALSE | 3.053394 | FALSE | Endothelia Capillary E |
| TTGTTGTA db/db2 | db/db | 4575  | 0.036232 | FALSE | 0.979749 | FALSE | Endothelia Venous EC   |
| TTGTTGTC db/db2 | db/db | 1108  | 0.068864 | FALSE | 2.231467 | FALSE | Photoreceptor          |
| TTGTTGTG db/db2 | db/db | 1524  | 0.010614 | FALSE | 1.167856 | FALSE | Endothelia Capillary E |
| TTGTTGTT db/db2 | db/db | 425   | 0.025868 | FALSE | 3.560927 | FALSE | Endothelia Capillary E |
| TTGTTGTT db/db2 | db/db | 520   | 0.058205 | FALSE | 3.365951 | FALSE | Muller cell            |
| TTGTTTGC db/db2 | db/db | 1840  | 0.021669 | FALSE | 1.442032 | FALSE | Endothelia EC-C4       |
| TTGTTTGG db/db2 | db/db | 4239  | 0.026328 | FALSE | 0.798595 | FALSE | Photoreceptor          |
| TTTACCAC db/db2 | db/db | 1083  | 0.020536 | FALSE | 1.593846 | FALSE | Microglia              |
| TTTACCAC db/db2 | db/db | 971   | 0.024971 | FALSE | 1.948309 | FALSE | Endothelia Capillary E |
| TTTACGTT db/db2 | db/db | 675   | 0.022059 | FALSE | 3.131037 | FALSE | Endothelia Capillary E |
| TTTACGTT db/db2 | db/db | 1106  | 0.052669 | FALSE | 1.677945 | FALSE | Photoreceptor          |
| TTTACGTT db/db2 | db/db | 5102  | 0.091004 | FALSE | 1.222535 | FALSE | Neuron                 |
| TTTACGTT db/db2 | db/db | 7256  | 0.029787 | FALSE | 0.840995 | FALSE | Photoreceptor          |
| TTTACTGA db/db2 | db/db | 1387  | 0.053718 | FALSE | 1.327757 | FALSE | Photoreceptor          |
| TTTACTGA db/db2 | db/db | 7088  | 0.045165 | FALSE | 0.987791 | FALSE | Photoreceptor          |
| TTTACTGT db/db2 | db/db | 6078  | 0.03313  | FALSE | 0.964498 | FALSE | Endothelia Venous EC   |
| TTTAGTCA db/db2 | db/db | 3754  | 0.020536 | FALSE | 1.041292 | FALSE | Photoreceptor          |
| TTTAGTCC db/db2 | db/db | 345   | 0.029266 | FALSE | 42.35925 | TRUE  |                        |
| TTTAGTCG db/db2 | db/db | 5953  | 0.24     | TRUE  | 4.834606 | FALSE |                        |
| TTTATGCA db/db2 | db/db | 509   | 0.043505 | FALSE | 4.259635 | FALSE | Muller cell            |
| TTTATGCT db/db2 | db/db | 3285  | 0.009063 | FALSE | 1.385709 | FALSE | Photoreceptor          |
| TTTCACAA db/db2 | db/db | 2028  | 0.021286 | FALSE | 1.221465 | FALSE | Endothelia Capillary E |
| TTTCACAA db/db2 | db/db | 489   | 0.024971 | FALSE | 44.86486 | TRUE  |                        |
| TTTCACAC db/db2 | db/db | 2773  | 0.020908 | FALSE | 1.471089 | FALSE | Endothelia Capillary E |
| TTTCAGTC db/db2 | db/db | 3315  | 0.038953 | FALSE | 1.346663 | FALSE | Photoreceptor          |
| TTTCAGTC db/db2 | db/db | 2268  | 0.016488 | FALSE | 1.170041 | FALSE | Endothelia Capillary E |
| TTTCATGA db/db2 | db/db | 555   | 0.040404 | FALSE | 44.61437 | TRUE  |                        |
| TTTCATGC db/db2 | db/db | 2192  | 0.039671 | FALSE | 2.013484 | FALSE | Photoreceptor          |
| TTTCATGG db/db2 | db/db | 10013 | 0.014711 | FALSE | 0.638921 | FALSE | Photoreceptor          |
| TTTCATGG db/db2 | db/db | 3003  | 0.093319 | FALSE | 5.916911 | TRUE  |                        |
| TTTCATGT db/db2 | db/db | 601   | 0.04192  | FALSE | 2.792765 | FALSE | Muller cell            |
| TTTCCTCA db/db2 | db/db | 1902  | 0.126958 | TRUE  | 3.49345  | FALSE |                        |
| TTTCCTCA db/db2 | db/db | 1007  | 0.038953 | FALSE | 1.537522 | FALSE | Photoreceptor          |
| TTTCCTCC db/db2 | db/db | 2626  | 0.05065  | FALSE | 0.998144 | FALSE | Photoreceptor          |
| TTTCCTCG db/db2 | db/db | 2767  | 0.034334 | FALSE | 1.241708 | FALSE | Endothelia Venous EC   |
| TTTCCTCG db/db2 | db/db | 677   | 0.020171 | FALSE | 55.60694 | TRUE  |                        |
| TTTCCTCT db/db2 | db/db | 590   | 0.034954 | FALSE | 36.14735 | TRUE  |                        |
| TTTCCTCT db/db2 | db/db | 805   | 0.021669 | FALSE | 2.271209 | FALSE | Endothelia Capillary E |
| TTTCCTCT db/db2 | db/db | 5058  | 0.034334 | FALSE | 1.017284 | FALSE | Photoreceptor          |
| TTTCGATA db/db2 | db/db | 917   | 0.025868 | FALSE | 0.490271 | FALSE | Photoreceptor          |
| TTTCGATC db/db2 | db/db | 470   | 0.014151 | FALSE | 2.002658 | FALSE | Muller cell            |
| TTTCGATC db/db2 | db/db | 3440  | 0.035586 | FALSE | 1.025936 | FALSE | Endothelia EC-C4       |
| TTTCGATC db/db2 | db/db | 398   | 0.016799 | FALSE | 4.045273 | FALSE | Muller cell            |
| TTTCGATT db/db2 | db/db | 381   | 0.041154 | FALSE | 26.43312 | TRUE  |                        |

|                 |       |      |          |       |          |       |                        |
|-----------------|-------|------|----------|-------|----------|-------|------------------------|
| TTTGACTA db/db2 | db/db | 267  | 0.049679 | FALSE | 59.24968 | TRUE  |                        |
| TTTGACTA db/db2 | db/db | 3446 | 0.048732 | FALSE | 0.993065 | FALSE | Photoreceptor          |
| TTTGACTG db/db2 | db/db | 6720 | 0.061912 | FALSE | 0.85928  | FALSE | Photoreceptor          |
| TTTGATCA db/db2 | db/db | 4513 | 0.022455 | FALSE | 0.839028 | FALSE | Photoreceptor          |
| TTTGATCG db/db2 | db/db | 528  | 0.016799 | FALSE | 3.741183 | FALSE | Muller cell            |
| TTTGATCG db/db2 | db/db | 2459 | 0.076994 | FALSE | 1.524202 | FALSE | Photoreceptor          |
| TTTGGAG/ db/db2 | db/db | 932  | 0.047807 | FALSE | 0.691757 | FALSE | Photoreceptor          |
| TTTGGAG/ db/db2 | db/db | 4204 | 0.037564 | FALSE | 1.052596 | FALSE | Endothelia Venous EC   |
| TTTGGAG( db/db2 | db/db | 2023 | 0.020908 | FALSE | 0.960803 | FALSE | Endothelia Aterial EC  |
| TTTGGAG1 db/db2 | db/db | 1612 | 0.011561 | FALSE | 1.547089 | FALSE | Endothelia Capillary E |
| TTTGGTTA db/db2 | db/db | 6948 | 0.065957 | FALSE | 0.391762 | FALSE | Photoreceptor          |
| TTTGGTTC db/db2 | db/db | 1091 | 0.006499 | FALSE | 1.171438 | FALSE | Endothelia Capillary E |
| TTTGGTTG db/db2 | db/db | 2823 | 0.084562 | FALSE | 1.978554 | FALSE | Muller cell            |
| TTTGGTTT db/db2 | db/db | 481  | 0.067388 | FALSE | 10.96296 | TRUE  |                        |
| TTTGTGA db/db2  | db/db | 3258 | 0.046906 | FALSE | 1.095461 | FALSE | Photoreceptor          |
| TTTGTGG db/db2  | db/db | 2715 | 0.018761 | FALSE | 1.080043 | FALSE | Endothelia Venous EC   |



;

C

C

C

C

C

C

C

C

C

C

C

C

C

C

C

C

C

C

C

C

C  
C

C

C

C

C

c

c

c

c

c

c

c

C

C

C

C

C

C

C

C

C

C



C

C

C

C

C

C

C

C

C

C

C

C

C

c

c

c

C

C

C

C

C

C

C

C

C

C

C

C

C

C

C

C

C

C

C

C

C

C

C

c

c

c

c

c



C

C

C

C

C

C

C

C

C

C

c

c

c

C

C

C

C

C

C

C

C

C

C

C

C

C

C

C

C

C

C

C

C

C

c

c

c

C

C

C

C

C

C



C  
C

C

C

C  
C

C  
C

C  
C

C

C

C

C

C  
C

C

C  
C  
C

C

C

C

C

C

C

C

C

C

C

C

C

C  
C

C

C

C

C

C

C

C

C

C

C

C

C

C

C

C

C

C

C

C

C

C

C

C

C

C

C

C



C

C

C

C

C

C

C

C

C

C

C

C

C

C

C  
C

C

C

C  
C

C  
C

C

C

C

C

C

C

C

C

C

C

C

C

C

c

c  
c

c

C

C

C

C

C

C

C



c

c

c

c

c

C

C

C

C  
C

C

C

C

C

C

C

C  
C

C

C

C

C

c

c

c

C  
C

C

C  
C  
C

C

c

c

c

c

c

c

c

c



C

C

C

C

C

C

C

C

C

C

C

C

C

C

C

C

C

c

c

c

c

c

c

c

c

c

c

c

c

c

c

c

c

C  
C

C

C

C

C



c

c

c

c

c

c

c

c

c

c

C  
C

C

C

C

C

C



C

C

C

C

C

C

C

C

C

C

C  
C

C

C

C

C

c

c

c

c

c

c

c

c



C

C

C

c

c

c

C  
C  
C

C  
C

C

C  
C

C

C

C

C

C

C  
C

C

C

c

c

c

c

c

c

c

c

c

c

c

C

C

C

C

C

C

C

C



C

C

C

C

C

C

C

C

C

C

C

C

C

C

C

C



C

C

C

C

C

C

c

c

c

c

c

c

C

C

C

C

C



C

C

C

C

C

C

C

C

C

c  
c

C  
C

C

C

C

C

C

C

C

C

C

C

c

c

C

C

C

C

C

C

C

C

C

C

C

C

C

C

c

c

c

c



C

C

C

C

C

C

C

C

C

C

C

C

C

C

C

C

C

C

C

C

C

C

C

C

C

C

C

C

C

C

C

C

C

C  
C  
C

C

C

c

c

c

c

C

C

C

C

C

C

C



C

C

C

C

C

C

C

C

C

C

C

C

C

C

C

c

c

c

c

c

c

C

C

C

C

C

C

C



c

c

c

c

c



C

C

C

C

C

C

C

C

C  
C

C

C

C

C

C

C

C

C

C

C

C

C  
C

C

c

c

c

c

c

c

C

C

C

C

C

C

C

C

C

C

C



C

C

C

C

C

C

C

C

C

C

C

C

C

C

C

c

c

c

C

C

C

C

C

C

C

C

C

C

C

C

C

C

C

C

C

C

C

C

C

C

C

C



C

C

C

C

C

c

c

c

c

c

c

c

c

C

C

C

C

C

C

C

C

C

C

C

C

C

C

C

C

C

C

C

C

C

C

C

C

C

C

C

C

C  
C

C

C

C



C

C

C

C

C

C

C

C

C

C

C

C

C

C

C

C

C

C

C

C

C

C

C

C

c

c

c

c

c

C

C

C

C

C

C

C

C

c

c

c

c

c

c



c

c

c

c

c

c

c

c

c

C

C

C

C

C

C

C

C

C

C

C

C

C

C

C

C

C

C

C

C

C

C

C

C

C

C

C

C

C

C

C

C

C

C



c

c

C

C

C

C

c

c

c

c

c

c

c

c

c

c

C

C

C

C

C

C

C

C

C

C

C

c

c

c

c

c

c

c

c



c

c

c

c

C

C

C

C

C

C

C

C

C

C

C

C

C

C

C

C

c

c

c

c

c

c

c

c

c

C

C

C

C

C

C

C

C

C

C

C

C

C

C



C

C

C

C

C

C

C

C

C

C

C

C

C

C

C

C

C

C

C

C

C

C  
C

C

C

C

C

C

C

C

C

C

C

C

C

C

C  
C

C

C  
C



c

c

c



C

C

C

C

C

C

C  
C

C  
C

C  
C

C

C  
C

C

C

C

c

c

c

c

c

c

c

c

c

c

c

C

C

C

C

C

C

C

C

C

c

c

c



c

c

c

c

c

c

c

c

c

c

c

C

C

C

C

C

c

c

c

c

C

C

C

C

C

C

C

C

C

C

C

C

C



c

c

c

c

c

c

c

c

C

C

C

C

C

C

C

C

C

c

c

c

c

C

C

C

C

C

C

c

c

c

c

C

C

C

C

C



C

C

C

C

C

c

c

c

c

c

c

c

C

C

C

C

C

C

C

C

C

C

C

C

C

C

C



C

C

C

C

C

C

C



C

C

C

C

C

C

C  
C

C  
C

C

C

C

C

C

C

C

C

C

C

C

C

C

C

C

C

C

C

C

C

C

C

C

C

C

C

C

C

C

C

C

C

C

C

C

C

C

C

C

C

C

C

C

C



C

C  
C

C

c

c

c

c

c

c

c

c

c

C  
C  
C

C  
C

C  
C

C

C

C

C  
C

C

C  
C  
C

C

C

C

C

C

C

C

C

C

C

C

C

C

C

C

C

C

C

C

C

C

C

C

C

C

C



C

C

C

C

C

C

C

c

c

c

c

C

C

C

C

C

C

C

C

c

c

c

C  
C

C

C

C

C

C

C

C

C  
C

C  
C

C

C

C

C

C

C

C

C

C

C

C

C

C

C

C



C

C

C

C

C

C

C

C

C

C

C

C

C

C

C

C

C

C

C

C

C

C

C

C

C

C

C

C

C

C

C

C

C

C

C

C

C

C

C

C

C

C

C

C

C

C  
C

C

C

C

C

C

C  
C

C

C

C

C

C



C

C

C

C

C

C

C

C

C

C

C

C

C

C

C

C

C

C

c

c

C

C

C

C

C

C

C

C

C

C

C

C

C

C

C

C

C

C

C

C

C

C

C

C  
C

C

C  
C

C  
C

C

C

C

C

C

C

C

C

C

C



C

C

C

C

C

C

C

C

c

c

c

c

c

C

C

C

C

C

C

C

C

C

C

C

C

C

C

C

C

C

C

C

C

C

C

C

C

C

C

C

C

C

C

C

C

C

C

C

C

C

C

C

c

c

c



C

C

C

C

C

C

C

C

C

C

C

C

C

C

C

C

C

C

C

C

C

C

C  
C

C

C

C

C

C

C

C  
C

C

C

C

C

C

C

C

C

C

C

C

C

C

C

C

C

C

C

C

C

C

C

C

C

C

C

C

C

C

C

C

C



c

c

c

c

c

C

C

C

C

C

C

C

C

C

C

C  
C  
C

C

C

C

C

C

C

C

C

C

C

C

C

C

C

C

C

C

C

C

C

C

C

C

C

C

C  
C  
C

C

C

C  
C

C

C

C

C

C

C

C

C

C

C



C

C

C

C

C

C

C

C

C

C

C

C

C

C

C

C

C

C

C

C

C

C  
C

C

C  
C  
C

C

C

C  
C

C  
C  
C

C  
C

C

C

C  
C

C

C

C

C

C

C

C

C

C

C

C

C

C

C

C

C

C

C

c

c

c

c



C

C

C

C

C

C

C

C

C

C

C

C

C  
C

C

C

C  
C

C

C

C

C

C

C

C

C

C

C

C

C

C

C

C

C

C

C

C

C

C

C

C

C

C

C

C

C

C

C  
C

C  
C

C  
C

C  
C

C

C

C

C

C

C

C

C

C



C  
C

C

C

C

C

C

C

C

c

c

c

c

c

C

C

C

C

C

C

C

C

C

C

C

C

C

C  
C

C  
C

C

C

C

C

C

C

C

C  
C

C

C

C

C  
C

C

C

C

C

C

C

C

C

C

C

C

C

C

C

c

c



C

C

C

C

C

c

c

c

C

C

C

C

C

C

C

C

C

C  
C

C

C

C  
C  
C

C

C

C

C

C

C

C

C

C

C

C

C

C

C

C

C

C

C

c

c

c

c

C

C

C

C

C

C



C

C

C

C

C

C

C

C

C

C

C

C

C

C

C

C

C

C

C

C

C

C

C

C

C

C

C

C

C

C

C

C

C

C

C  
C

C

C

C

C  
C

C

C

C

C

C

C

C

C

C

C

C

C

C

C

C

C

C



C  
C

C  
C  
C

C

C

C

C

C

C

C

C

C

C

C

C

C

C

C

C

C

C

C

C

C

C

C

C

C

C

C

C

C

C

C

C

C

C

C

C

C

C

C

C

C

C

C

C

C

C

C

C

C



C

C

C

C

C

C

C

C

C

C

C

C

C

C

C

C

C

C

C

C

C

C

C

C

C

C

C

C

C

C

C

C

C

C

C

C

C

C

C

C

C

C

C

C

C

C

C

C

C

C

C

C

C

C

C

C

C

C

C

C



C

C

C

C

C

C

C

C

C

C

c

c

c

c

c

C

C

C

C

C

C

C

C

C

C

C

C

C

C

C

C

C

C

C

C

C

C

C

C

C  
C  
C

C

C  
C

C

C  
C

C  
C

C

C



C

C

C

C

C

C

C

C

C

C

C

C

C

C

C

C

C

C

C

C

C

C

C

C

C

C

C

C

C

C

C

C

C

C

C

C

C

C

C

C

C

C

C

C

C

C

C

C



C  
C

C  
C

C

C

c

c

C

C

C

C

C

C

C

C

C  
C  
  
C  
  
C

C

C

C  
C  
C

C

C

C

C

C

C

C

C

C

C

C

C

C

C

C

C

C

C

C

C

C  
C

C

C

C

C

C

C

C

C

C

C

C

C

C



C

C

C

C

C

C

C

C

C

C  
C

C

C

C

C

C

C

C

C

C

C

C

C

C

C

C

C

C

C

C

C

C

C

C

C

C

C

C

C

C

C

C

C

C

C

C

C

C

C

C

C

C

C

C

C

C

C

C

C

C

C

C

C

C

C

C

C

C

C

C

C



C

C

C

C

C

C

C  
C

C

C

C  
C

C

C

C

C

C

C

C

C

C

C

C

C  
C

C

C

C

C

C

C

C

C

C

C

C

C

C

C

C

C

C

C

C

C

C

C

C

C

C

C

C

C

C

C

C

C

C

C



C  
C

C

C

C

C  
C

C  
C

C  
C  
C

C

C  
C

C

C

C

C

C

C

C

C

C

C

C

C

C

C

C

C

C

C

C

C

C

C

C  
C  
C

C

C

C

C

C

C  
C

C

C

C

C

C

C

C

C

C

C

C

C

C

C

C

C

C

C

C

C



C

C

C

C

C

C

C

C

C

C

C

C

C

C

C  
C

C

C

C

C

C

C

C

C

C

C

C

C

C

c

c

c

c

c

c

C

C

C

C

C

C

C

C

C

C

C

C

C



c

c

c

c

C

C

C

C

C

C

C

C

C

C

C

C

C

C

C

C

C

C

C

C

C

C

C

C

C

C

C

C

C

C

C

C

C

C

C

C

C

C

C  
C

C

C

C

C

C  
C

C  
C

C

C

C

C



C

C

C

C

C

C

C

C

C

C

C

c

c

c

c

C  
C

C  
C  
C  
C

C

C

C  
C

C  
C

C

C  
C

C

C

C

C

C

C

C

C

C

C

C

C

C

C

c

c

c

c



C

C

C

C

C

C

C

C

C

C

C

C  
C

C  
C  
C

C

C

C

C  
C

C  
C

C

C

C

c

c

c

c

c

C

C

C

C

C

C

C  
C

C

c

c



C

C

C

C

C

C

C

C

C

C

C

C

C

C

C

C

C

C

C

C

C

C

C

C

C

C

C

C

C

C

C

C

C

C

C

C

C

C

C

c

c

c

c

c

c

c

c

c

C

C

C

C

C

C

C

C

C

C

C

C



C

C

C

C

C

C

C

C

C

C

C

C

C

C

C

C  
C

C

C

C  
C

C  
C

C  
C

C

C

C

C

C

C

C

C

C

C

C

C

C

C

C

C

C

C

C

C

C

C

C

C

C

C

C

C

C

C

C

C

C

C

C

c

c

c

c

c



C

C

C

C

C

C

C

C

C

C

C  
C  
C  
C

C

C

C

C

C

C

C

C

C

C

C

C

C

C

C

C

C

C

C

C

C

C

C

C

C

C

C

C

C

C

C

C

C

C

C

C  
C  
C

C

C  
C

C



C

C  
C

C

C

C

C  
C

C

C

C

C

C

C

C  
C

C

C  
C

C

C

C

C

C

C

C

C

C

C

C

C

C

C

C

C

C

C

C

C

C

C

C

c

c

c

c

C

C

C

C



C

C

C

C

C

C

C

C

C

C

C

c

c

c

c

C

C

C

C

C

C

C

C

C

C

C

C

C

C

C

C

C

C

C

C  
C  
C

C

C

C

C  
C

C

C

C

C

C

C

C

C  
C  
C



c

c

c

c

C

C

C

C

C

C

C

C

C

C

C

C

C

C

C

C

C

C

C  
C

C

C

C

C

C

C

C

C

C

C

C

C

C

C

C

C

C

C

C

C

C

C

C

C

C

C

C

C

C

C

C

C



C

C

C

C

C

C

C

C

c

c

c

C  
C

C

C  
C

C

C

C

C

C

C

C

C

C

C

C

C

C

C

C

C

C

C  
C  
C

C

C

C

C

C

C

C

C

C

C

C

C

C

C

C

C

c

c
