# Supplementary material
Source: publisher figshare collection journal article supplement (https://diabetesjournals.figshare.com/articles/dataset/_/24550435)
Supplement: Supplementary file 9 [file 1]

| id_cp      | interacting_partner_a | partner_b                | gene_a          | gene_b    | secreted | receptor_a | receptor_b |
|------------|-----------------------|--------------------------|-----------------|-----------|----------|------------|------------|
| CPI-SC0FA2 | CSPG4_inte            | simple:Q6U complex:int   | ENSG00000173546 |           | FALSE    | FALSE      | FALSE      |
| CPI-SS006C | MDK_LRP1              | simple:P21: simple:Q07   | ENSG00000       | ENSG00000 | TRUE     | FALSE      | TRUE       |
| CPI-SS0B38 | CADM3_EP              | simple:Q8N simple:Q9H    | ENSG00000       | ENSG00000 | FALSE    | FALSE      | FALSE      |
| CPI-SS0855 | NRP1_PGF              | simple:O14 simple:P49    | ENSG00000       | ENSG00000 | TRUE     | TRUE       | FALSE      |
| CPI-CS0E0B | FLT1_comp             | complex:FL simple:P49763 | ENSG00000       |           | TRUE     | TRUE       | FALSE      |
| CPI-CS0E54 | BMPR1A_B              | complex:BN simple:P12644 | ENSG00000       |           | TRUE     | TRUE       | FALSE      |
| CPI-SS01F6 | FGF2_FGFR             | simple:P09( simple:P11:  | ENSG00000       | ENSG00000 | TRUE     | FALSE      | TRUE       |
| CPI-CS0C57 | PlexinA1_cc           | complex:Pl simple:Q8NFY4 | ENSG00000       |           | FALSE    | TRUE       | FALSE      |
| CPI-SS0CB8 | WNT5A_PT              | simple:P41: simple:Q15   | ENSG00000       | ENSG00000 | TRUE     | FALSE      | TRUE       |
| CPI-SS0F21 | SCGB3A1_N             | simple:Q96 simple:Q9U    | ENSG00000       | ENSG00000 | TRUE     | FALSE      | TRUE       |
| CPI-SC00EA | COL5A3_int            | simple:P25: complex:int  | ENSG00000080573 |           | TRUE     | FALSE      | FALSE      |
| CPI-SC0376 | COL8A1_int            | simple:P27( complex:int  | ENSG00000144810 |           | TRUE     | FALSE      | FALSE      |
| CPI-SC042B | COL4A5_int            | simple:P29: complex:int  | ENSG00000188153 |           | TRUE     | FALSE      | FALSE      |
| CPI-SC0036 | COL3A1_int            | simple:P02: complex:int  | ENSG00000168542 |           | TRUE     | FALSE      | FALSE      |
| CPI-SC0886 | COL4A3_int            | simple:Q01 complex:int   | ENSG00000169031 |           | TRUE     | FALSE      | FALSE      |
| CPI-SC09DB | COL1A2_int            | simple:P08: complex:int  | ENSG00000164692 |           | TRUE     | FALSE      | FALSE      |
| CPI-SC0FB8 | HTR1B_Ser             | simple:P28: complex:Se   | ENSG00000135312 |           | TRUE     | TRUE       | FALSE      |
| CPI-SS068C | FGF1_TGFB             | simple:P05: simple:Q03   | ENSG00000       | ENSG00000 | TRUE     | FALSE      | TRUE       |
| CPI-CS0475 | ACVR_1A2A             | complex:AC simple:P22003 | ENSG00000       |           | TRUE     | TRUE       | FALSE      |
| CPI-CS0FA9 | ACVR_1A2E             | complex:AC simple:P22003 | ENSG00000       |           | TRUE     | TRUE       | FALSE      |
| CPI-CS047E | BMR1A_AC              | complex:BN simple:P22003 | ENSG00000       |           | TRUE     | TRUE       | FALSE      |
| CPI-CS0CA3 | BMR1A_AV              | complex:BN simple:P22003 | ENSG00000       |           | TRUE     | TRUE       | FALSE      |
| CPI-SS0D22 | NRP2_PGF              | simple:O60 simple:P49    | ENSG00000       | ENSG00000 | TRUE     | TRUE       | FALSE      |
| CPI-SS033E | NRP1_VEGF             | simple:O14 simple:P49    | ENSG00000       | ENSG00000 | TRUE     | TRUE       | FALSE      |
| CPI-SS0DD9 | NGF_SORT1             | simple:P01: simple:Q99   | ENSG00000       | ENSG00000 | TRUE     | FALSE      | TRUE       |
| CPI-SC0B25 | VCAM1_int             | simple:P19: complex:int  | ENSG00000162692 |           | FALSE    | FALSE      | FALSE      |
| CPI-SS02DA | BSG_PPIA              | simple:P35( simple:P62:  | ENSG00000       | ENSG00000 | TRUE     | FALSE      | FALSE      |
| CPI-SC04AB | COL4A4_int            | simple:P53: complex:int  | ENSG00000081052 |           | TRUE     | FALSE      | FALSE      |
| CPI-CS046B | BMPR1A_B              | complex:BN simple:P22003 | ENSG00000       |           | TRUE     | TRUE       | FALSE      |
| CPI-SS0A07 | TNFRSF21_             | simple:O75 simple:P05(   | ENSG00000       | ENSG00000 | FALSE    | TRUE       | FALSE      |
| CPI-SS0BFB | PLXNB2_PT             | simple:O15 simple:P21:   | ENSG00000       | ENSG00000 | TRUE     | TRUE       | FALSE      |
| CPI-SS0755 | FGF1_FGFR             | simple:P05: simple:P11:  | ENSG00000       | ENSG00000 | TRUE     | FALSE      | TRUE       |
| CPI-SS0E61 | FLT1_PGF              | simple:P17: simple:P49   | ENSG00000       | ENSG00000 | TRUE     | TRUE       | FALSE      |
| CPI-SS0158 | FGF1_FGFR             | simple:P05: simple:P22(  | ENSG00000       | ENSG00000 | TRUE     | FALSE      | TRUE       |
| CPI-CS0C01 | FLT1_comp             | complex:FL simple:P49765 | ENSG00000       |           | TRUE     | TRUE       | FALSE      |
| CPI-SS0EE0 | CDH2_CDH:             | simple:P19( simple:P19(  | ENSG00000       | ENSG00000 | FALSE    | FALSE      | FALSE      |
| CPI-CS0E1B | ACVR1_BM              | complex:AC simple:P22003 | ENSG00000       |           | TRUE     | TRUE       | FALSE      |
| CPI-SC03FF | LAMC1_int             | simple:P11( complex:int  | ENSG00000135862 |           | TRUE     | FALSE      | FALSE      |
| CPI-SS0397 | FGFR1_NCA             | simple:P11: simple:P13:  | ENSG00000       | ENSG00000 | TRUE     | TRUE       | TRUE       |
| CPI-SC0C21 | JAM2_integ            | simple:P57( complex:int  | ENSG00000154721 |           | FALSE    | FALSE      | FALSE      |
| CPI-SS0D95 | PDGFRB_PT             | simple:P09( simple:Q9G   | ENSG00000       | ENSG00000 | TRUE     | TRUE       | FALSE      |
| CPI-SC0717 | VTN_integr            | simple:P04( complex:int  | ENSG00000109072 |           | TRUE     | FALSE      | FALSE      |
| CPI-SS0F9D | JAM3_JAM:             | simple:Q9B simple:Q9B    | ENSG00000       | ENSG00000 | TRUE     | FALSE      | FALSE      |

|                                                                     |       |       |       |
|---------------------------------------------------------------------|-------|-------|-------|
| CPI-SS087B JAM2_JAM: simple:P57: simple:Q9B ENSG000000 ENSG000000   | TRUE  | FALSE | FALSE |
| CPI-SS03A4 AXL_GAS6 simple:P30: simple:Q14 ENSG000000 ENSG000000    | TRUE  | TRUE  | FALSE |
| CPI-SS0954 CCRL2_RAR simple:O00: simple:Q99 ENSG000000 ENSG000000   | TRUE  | TRUE  | FALSE |
| CPI-SC09B4 FN1_integri simple:P02: complex:int ENSG000000115414     | TRUE  | FALSE | FALSE |
| CPI-SS0BAB ANGPT2_TE simple:O15 simple:Q02 ENSG000000 ENSG000000    | TRUE  | FALSE | TRUE  |
| CPI-SC0F96 FN1_integri simple:P02: complex:int ENSG000000115414     | TRUE  | FALSE | FALSE |
| CPI-SS0415 MERTK_GA: simple:Q12 simple:Q14 ENSG000000 ENSG000000    | TRUE  | TRUE  | FALSE |
| CPI-SS05A2 PDGFB_PD: simple:P01: simple:P09: ENSG000000 ENSG000000  | TRUE  | FALSE | TRUE  |
| CPI-SS03E2 ADORA2A_ simple:P29: simple:P49: ENSG000000 ENSG000000   | FALSE | TRUE  | FALSE |
| CPI-SS0241 NRP2_SEM: simple:O60: simple:Q99 ENSG000000 ENSG000000   | TRUE  | TRUE  | FALSE |
| CPI-SS0292 PDGFB_LRP simple:P01: simple:Q07 ENSG000000 ENSG000000   | TRUE  | FALSE | TRUE  |
| CPI-SS0AB2 PLXNB2_SE simple:O15 simple:Q9C ENSG000000 ENSG000000    | FALSE | TRUE  | TRUE  |
| CPI-SC03AF SEMA7A_in simple:O75 complex:int ENSG000000138623        | FALSE | FALSE | FALSE |
| CPI-SS0751 AGRN_NCA simple:O00: simple:P13: ENSG000000 ENSG000000   | TRUE  | FALSE | TRUE  |
| CPI-SS055E LAMP1_FA: simple:P11: simple:Q92 ENSG000000 ENSG000000   | TRUE  | TRUE  | FALSE |
| CPI-SS04F3 COPA_SOR: simple:P53: simple:Q99 ENSG000000 ENSG000000   | TRUE  | FALSE | TRUE  |
| CPI-CS0406 Cholesterol complex:Ch simple:P35398 ENSG000000          | TRUE  | FALSE | TRUE  |
| CPI-SS00F4 PTN_PTPRS simple:P21: simple:Q13 ENSG000000 ENSG000000   | TRUE  | FALSE | TRUE  |
| CPI-SS0715 ACKR3_CXC simple:P25: simple:P48: ENSG000000 ENSG000000  | TRUE  | TRUE  | FALSE |
| CPI-SS0938 DLL4_NOTC simple:Q9N simple:Q9U ENSG000000 ENSG000000    | FALSE | FALSE | TRUE  |
| CPI-SS00A6 ADORA2A_ simple:P29: simple:P43: ENSG000000 ENSG000000   | TRUE  | TRUE  | FALSE |
| CPI-SS0C85 PROS1_AXL simple:P07: simple:P30: ENSG000000 ENSG000000  | TRUE  | FALSE | TRUE  |
| CPI-SS0C4D NOTCH3_JA simple:Q9U simple:Q9Y ENSG000000 ENSG000000    | FALSE | TRUE  | FALSE |
| CPI-SS0B87 NOTCH1_JA simple:P46: simple:P78: ENSG000000 ENSG000000  | FALSE | TRUE  | FALSE |
| CPI-SS005F UNC5B_NT: simple:Q8I: simple:Q9H ENSG000000 ENSG000000   | TRUE  | TRUE  | FALSE |
| CPI-SC0744 COL4A1_int simple:P02: complex:int ENSG000000187498      | TRUE  | FALSE | FALSE |
| CPI-SS0593 AGRN_PTP: simple:O00: simple:Q13 ENSG000000 ENSG000000   | TRUE  | FALSE | TRUE  |
| CPI-SS0B99 JAG1_NOTC simple:P78: simple:Q9U ENSG000000 ENSG000000   | FALSE | FALSE | TRUE  |
| CPI-SS02A0 FAM3C_CLE simple:Q92 simple:Q9U ENSG000000 ENSG000000    | TRUE  | FALSE | TRUE  |
| CPI-SC08F9 FN1_integri simple:P02: complex:int ENSG000000115414     | TRUE  | FALSE | FALSE |
| CPI-SS02A5 LRPAP1_SO simple:P30: simple:Q99 ENSG000000 ENSG000000   | FALSE | FALSE | TRUE  |
| CPI-SS0947 FLT1_VEGF: simple:P17: simple:P49: ENSG000000 ENSG000000 | TRUE  | TRUE  | FALSE |
| CPI-SC024F LAMC1_int: simple:P11: complex:int ENSG000000135862      | TRUE  | FALSE | FALSE |
| CPI-SS07CC GRN_SORT: simple:P28: simple:Q99 ENSG000000 ENSG000000   | TRUE  | FALSE | TRUE  |
| CPI-SS0178 TGFB2_TGF simple:P61: simple:Q03 ENSG000000 ENSG000000   | TRUE  | FALSE | TRUE  |
| CPI-SC03F7 COL4A2_int simple:P08: complex:int ENSG000000134871      | TRUE  | FALSE | FALSE |
| CPI-SS0DA0 TNFRSF1A_ simple:P19: simple:P28: ENSG000000 ENSG000000  | TRUE  | TRUE  | FALSE |

| annotation_             | Aterial EC F | Aterial EC F | Pericyte At | Pericyte At | Capillary EC | Capillary EC | Pericyte Ca | Pericyte Ca |
|-------------------------|--------------|--------------|-------------|-------------|--------------|--------------|-------------|-------------|
| curated                 |              | 1            |             | 1           |              | 1            |             | 1           |
| I2D,InnateDB-All        |              | 1            |             | 1           |              | 1            |             | 1           |
| curated                 |              | 1            |             | 1           |              | 1            |             | 1           |
| curated                 |              | 1            |             | 1           |              | 1            |             | 1           |
| curated                 |              | 1            |             | 1           |              | 1            |             | 1           |
| curated                 |              | 1            |             | 1           |              | 1            |             | 1           |
| curated                 |              | 1            |             | 1           |              | 1            |             | 1           |
| curated                 |              | 1            |             | 1           |              | 1            |             | 1           |
| InnateDB-All            |              | 1            |             | 1           |              | 1            |             | 1           |
| InnateDB-All            |              | 1            |             | 1           |              | 1            |             | 1           |
| curated                 |              | 1            |             | 1           |              | 1            |             | 1           |
| curated                 |              | 1            |             | 1           |              | 1            |             | 1           |
| curated                 |              | 1            |             | 1           |              | 1            |             | 1           |
| curated                 |              | 1            |             | 1           |              | 1            |             | 1           |
| curated                 |              | 1            |             | 1           |              | 1            |             | 1           |
| curated                 |              | 1            |             | 1           |              | 1            |             | 1           |
| curated                 |              | 1            | 0.199       | 0           |              | 1            |             | 1           |
| InnateDB-All            |              | 1            |             | 0.963       |              | 1            |             | 0.884       |
| curated                 |              | 1            |             | 1           |              | 1            |             | 1           |
| curated                 |              | 1            |             | 1           |              | 1            |             | 1           |
| curated                 |              | 1            |             | 1           |              | 1            |             | 1           |
| curated                 |              | 1            |             | 1           |              | 1            |             | 1           |
| curated                 |              | 1            |             | 1           |              | 1            |             | 1           |
| curated                 |              | 1            |             | 1           |              | 1            |             | 1           |
| curated                 |              | 1            |             | 1           | 0.603        |              |             | 1           |
| curated                 |              | 1            |             | 1           |              | 1            |             | 1           |
| curated                 |              | 1            |             | 0.985       |              | 1            |             | 1           |
| curated                 |              | 0.204        |             | 1           |              | 1            |             | 1           |
| curated                 |              | 0.899        |             | 1           |              | 1            |             | 1           |
| curated                 |              | 1            |             | 1           |              | 1            |             | 1           |
| curated                 |              | 1            |             | 1           |              | 1            |             | 1           |
| curated                 |              | 1            |             | 0.393       |              | 1            |             | 1           |
| I2D,IMEx,InnateDB-All,I |              | 1            | 3.959       | 0           |              | 1            |             | 1           |
| curated                 |              | 1            |             | 1           |              | 1            |             | 1           |
| curated                 | 14.431       | 0.038        |             | 1           |              | 1            |             | 1           |
| curated                 |              | 1            | 0.179       | 0           |              | 1            |             | 1           |
| curated                 |              | 1            |             | 1           |              | 1            |             | 1           |
| curated                 |              | 1            |             | 1           |              | 1            |             | 1           |
| curated                 | 0.225        | 0.008        |             | 1           |              | 0.29         |             | 1           |
| curated                 |              | 0.928        |             | 1           |              | 1            |             | 1           |
| curated                 |              | 1            |             | 0.961       |              | 1            |             | 0.546       |
| curated                 |              | 0.244        |             | 1           |              | 0.962        |             | 1           |
| curated                 |              | 1            | 1.872       | 0           |              | 1            | 1.805       | 0           |
| curated                 |              | 1            | 7.901       | 0           |              | 1            |             | 1           |
| curated                 |              | 1            |             | 1           |              | 1            |             | 1           |

|                                    |       |       |       |       |       |       |       |       |
|------------------------------------|-------|-------|-------|-------|-------|-------|-------|-------|
| curated                            |       | 0.576 |       | 1     |       | 1     |       | 1     |
| curated                            |       | 1     | 0.845 | 0     |       | 1     |       | 0.338 |
| curated                            | 0.625 | 0     |       | 1     |       | 1     |       | 1     |
| curated                            | 3.508 | 0.04  |       | 1     |       | 1     |       | 1     |
| curated                            |       | 1     | 1.315 | 0     |       | 1     |       | 1     |
| curated                            | 3.584 | 0.024 |       | 1     |       | 1     |       | 1     |
| curated                            |       | 1     |       | 0.211 |       | 1     |       | 1     |
| curated                            | 2.571 | 0     |       | 1     | 2.45  | 0     |       | 1     |
| curated                            |       | 1     | 0.787 | 0     |       | 1     |       | 1     |
| curated                            |       | 1     |       | 1     |       | 1     |       | 1     |
| I2D,InnateC                        | 1.298 | 0     |       | 1     | 1.177 | 0.04  |       | 1     |
| curated                            |       | 1     |       | 0.467 |       | 1     |       | 0.837 |
| curated                            |       | 1     |       | 1     |       | 1     |       | 1     |
| curated                            |       | 0.657 |       | 1     |       | 1     |       | 1     |
| InnateDB-All                       |       | 1     |       | 1     |       | 1     |       | 1     |
| IMEx,InnateDB-All,IntAc            |       | 0.71  |       | 1     |       | 1     |       | 1     |
| curated                            |       | 1     |       | 1     |       | 1     |       | 1     |
| I2D,IMEx,In                        | 3.944 | 0     |       | 1     |       | 1     |       | 1     |
| guidetopharmacology.c              |       | 1     |       | 1     |       | 1     |       | 0.992 |
| curated                            | 1.442 | 0     |       | 1     | 1.226 | 0     |       | 1     |
| I2D,IMEx,InnateDB-All,IntAc        |       | 1     | 0.405 | 0     |       | 1     | 0.345 | 0.039 |
| guidetopha                         | 0.487 | 0     |       | 1     |       | 0.221 |       | 1     |
| curated                            |       | 1     | 1.672 | 0     |       | 1     | 1.363 | 0     |
| curated                            |       | 0.961 |       | 1     |       | 1     |       | 1     |
| curated                            | 0.58  | 0     |       | 1     |       | 0.776 |       | 1     |
| curated                            |       | 1     |       | 1     |       | 1     |       | 1     |
| curated                            |       | 0.15  |       | 1     |       | 1     |       | 1     |
| curated                            | 1.419 | 0     |       | 1     | 1.231 | 0     |       | 1     |
| IMEx,InnateDB-All,IntAc            |       | 1     |       | 0.796 |       | 1     |       | 1     |
| curated                            | 3.508 | 0.04  |       | 1     |       | 1     |       | 1     |
| curated                            |       | 0.906 |       | 1     |       | 1     |       | 1     |
| curated                            |       | 0.054 |       | 1     |       | 1     |       | 1     |
| curated                            |       | 1     |       | 1     |       | 1     |       | 1     |
| IMEx,InnateDB-All,MIN <sup>+</sup> |       | 0.814 |       | 1     |       | 1     |       | 1     |
| curated                            | 0.841 | 0     |       | 1     |       | 1     |       | 1     |
| curated                            |       | 1     |       | 1     |       | 1     |       | 1     |
| IMEx,InnateDB-All,MIN <sup>+</sup> |       | 1     |       | 1     |       | 1     |       | 1     |

| Venous EC | Venous EC | Pericyte | Ve Pericyte | Ve EC-C4 | Peric EC-C4 | Peric Pericyte | EC Pericyte | EC-C4_qual |
|-----------|-----------|----------|-------------|----------|-------------|----------------|-------------|------------|
|           | 1         |          | 1           |          | 1           | 0.898          | 0           |            |
| 0.556     | 0         |          | 1           |          | 1           |                | 1           |            |
|           | 1         |          | 1           | 0.298    | 0           |                | 1           |            |
| 1.382     | 0         |          | 1           |          | 0.992       |                | 1           |            |
| 2.183     | 0         |          | 1           |          | 0.111       |                | 1           |            |
|           | 1         | 0.226    | 0           |          | 1           |                | 1           |            |
| 0.178     | 0         |          | 1           |          | 1           |                | 1           |            |
| 0.364     | 0         |          | 1           |          | 1           |                | 1           |            |
|           | 1         |          | 1           | 0.438    | 0           |                | 1           |            |
|           | 1         |          | 1           | 1.686    | 0           |                | 1           |            |
|           | 1         | 2.808    | 0           |          | 1           | 2.034          | 0           |            |
|           | 1         | 2.817    | 0           |          | 1           | 2.043          | 0           |            |
|           | 1         | 2.808    | 0           |          | 1           | 2.034          | 0           |            |
|           | 1         | 2.815    | 0           |          | 1           | 2.041          | 0           |            |
|           | 1         | 2.829    | 0           |          | 1           | 2.055          | 0           |            |
|           | 1         | 2.813    | 0           |          | 1           | 2.039          | 0           |            |
|           | 1         | 0.21     | 0           |          | 1           |                | 1           |            |
|           | 1         | 0.473    | 0           |          | 1           | 0.404          | 0           |            |
| 0.185     | 0         |          | 1           | 0.158    | 0           |                | 1           |            |
| 0.214     | 0         |          | 1           | 0.185    | 0           |                | 1           |            |
| 0.185     | 0         |          | 1           | 0.158    | 0           |                | 1           |            |
| 0.214     | 0         |          | 1           | 0.185    | 0           |                | 1           |            |
| 0.532     | 0         |          | 1           | 0.429    | 0           |                | 1           |            |
| 1.375     | 0         |          | 1           |          | 1           |                | 1           |            |
| 0.247     | 0         | 0.401    | 0           |          | 1           | 0.285          | 0           |            |
|           | 0.265     |          | 1           | 2.327    | 0           |                | 1           |            |
| 50.255    | 0         |          | 1           |          | 1           |                | 1           |            |
|           | 1         | 2.851    | 0           |          | 1           | 2.077          | 0           |            |
| 0.412     | 0         | 0.309    | 0           | 0.227    | 0           |                | 1           |            |
|           | 1         | 6.75     | 0           |          | 1           | 6.322          | 0           |            |
|           | 1         | 4.66     | 0           |          | 1           |                | 1           |            |
| 0.202     | 0         | 0.277    | 0           |          | 1           | 0.238          | 0           |            |
| 21.571    | 0         |          | 1           | 14.707   | 0           |                | 1           |            |
|           | 1         | 0.171    | 0           |          | 1           | 0.217          | 0           |            |
| 2.176     | 0         |          | 1           |          | 0.543       |                | 1           |            |
| 0.664     | 0         | 0.664    | 0           |          | 0.556       |                | 0.556       |            |
| 0.319     | 0         |          | 1           | 0.248    | 0           |                | 1           |            |
| 1.438     | 0         | 0.71     | 0.023       | 0.864    | 0           |                | 1           |            |
|           | 0.062     | 0.309    | 0           |          | 0.664       | 0.254          | 0.039       |            |
| 1.123     | 0         |          | 1           | 1.259    | 0           |                | 1           |            |
|           | 1         | 1.879    | 0           |          | 1           | 1.887          | 0           |            |
| 14.076    | 0         | 8.106    | 0           |          | 1           | 7.979          | 0           |            |
| 0.365     | 0         | 0.365    | 0           | 0.217    | 0           | 0.217          | 0           |            |

|        |       |        |       |       |       |        |       |
|--------|-------|--------|-------|-------|-------|--------|-------|
| 1.075  | 0     |        | 1     | 1.211 | 0     |        | 1     |
|        | 0.605 | 1.088  | 0     |       | 1     |        | 0.22  |
| 0.754  | 0     | 0.959  | 0     | 0.659 | 0     |        | 0.976 |
| 4.894  | 0     |        | 1     | 4.755 | 0     |        | 1     |
|        | 1     | 1.738  | 0     |       | 1     | 1.199  | 0     |
| 4.97   | 0     |        | 1     | 4.831 | 0     |        | 1     |
|        | 1     | 0.88   | 0     |       | 1     |        | 1     |
| 3.082  | 0     |        | 1     | 2.666 | 0     |        | 1     |
|        | 1     | 0.643  | 0     |       | 1     | 0.726  | 0     |
|        | 1     |        | 0.244 |       | 1     | 1.141  | 0     |
| 1.808  | 0     |        | 1     | 1.393 | 0     |        | 1     |
|        | 1     | 0.3    | 0     |       | 1     | 0.254  | 0     |
|        | 0.97  |        | 1     | 2.382 | 0     |        | 1     |
| 0.717  | 0     |        | 1     |       | 0.068 |        | 1     |
| 1.98   | 0     |        | 1     | 1.328 | 0.031 |        | 1     |
| 0.745  | 0     |        | 0.392 | 0.549 | 0.015 |        | 1     |
|        | 0.945 |        | 1     | 1.146 | 0     |        | 1     |
| 4.645  | 0     |        | 1     |       | 1     |        | 1     |
|        | 1     | 15.364 | 0     |       | 1     | 12.077 | 0.008 |
| 1.433  | 0     |        | 1     | 1.255 | 0     |        | 1     |
|        | 1     | 0.548  | 0     |       | 1     | 0.437  | 0     |
| 0.666  | 0     | 0.604  | 0     | 0.648 | 0     |        | 1     |
|        | 1     | 1.694  | 0     |       | 1     | 1.593  | 0     |
| 2.336  | 0     |        | 1     | 1.501 | 0     |        | 1     |
| 0.694  | 0     | 0.427  | 0     |       | 0.209 |        | 1     |
| 3.662  | 0     | 3.555  | 0     |       | 0.101 |        | 0.467 |
| 0.743  | 0     |        | 1     | 0.568 | 0     |        | 1     |
| 1.654  | 0     | 2.124  | 0     | 1.414 | 0     |        | 0.704 |
|        | 1     | 2.351  | 0     |       | 1     | 2.594  | 0     |
| 4.894  | 0     |        | 1     | 4.755 | 0     |        | 1     |
| 0.614  | 0     | 0.473  | 0.016 | 0.483 | 0.008 |        | 1     |
| 21.564 | 0     |        | 1     | 14.7  | 0     |        | 1     |
|        | 1     | 2.334  | 0     |       | 1     | 2.052  | 0     |
| 0.637  | 0     |        | 0.091 | 0.578 | 0     |        | 1     |
| 0.943  | 0     |        | 1     |       | 0.471 |        | 1     |
| 2.627  | 0     | 3.121  | 0     | 2.524 | 0.008 |        | 0.164 |
|        | 0.392 | 0.595  | 0     | 0.723 | 0     | 0.536  | 0.024 |
