# Supplementary material
Source: publisher figshare collection journal article supplement (https://diabetesjournals.figshare.com/articles/dataset/_/24550435)
Supplement: Supplementary file 10 [file 1]

|            | <b>Description</b>                                             | <b>GeneRatio</b> | <b>BgRatio</b> |
|------------|----------------------------------------------------------------|------------------|----------------|
| GO:0050727 | regulation of inflammatory response                            | 62/1589          | 354/23210      |
| GO:0007159 | leukocyte cell-cell adhesion                                   | 51/1589          | 319/23210      |
| GO:0019221 | cytokine-mediated signaling pathway                            | 48/1589          | 341/23210      |
| GO:0045766 | positive regulation of angiogenesis                            | 40/1589          | 185/23210      |
| GO:1903039 | positive regulation of leukocyte cell-cell adhesion            | 35/1589          | 203/23210      |
| GO:0043536 | positive regulation of blood vessel endothelial cell migration | 12/1589          | 56/23210       |
| GO:0006665 | sphingolipid metabolic process                                 | 22/1589          | 123/23210      |

**qvalue**

1.36E-09

7.06E-07

3.53E-05

8.06E-09

1.10E-05

0.002351421

0.000354938

**topgene**

Ctla2a/Cd200/Nfkb1a/Cd59a/Tgm2/Zfp36/Socs3/Gpx1/Ier3/Tnfrsf1a/Rps19/Cfh/Sbno2/Sema7a/Il1r1/Ptgs2/Lpl/N  
Klf4/Xbp1/Zbtb16/Vcam1/Il4ra/Rps3/Icam1/Prnp/Tgfbr2/Msn/Smad7/Nfkbiz/Il6ra/Pecam1/Pnp/Cebpb/Cd81/Il2  
Ifitm3/Ifitm2/Nfkb1a/Egr1/Ecm1/Fkbp1a/Tnfrsf1a/Stat3/Klf6/Ackr1/Il1r1/Ifitm1/Adipor2/Il6ra/Osmr/Csf2rb/Il2rg,  
Lrg1/Klf4/Xbp1/Ecm1/Tnfrsf1a/Eng/Stat3/Ramp2/Rhob/Pxn/Cd34/Hif1a/Tgfbr2/Ptgs2/S100a1/Ras/Hspb1/Rhoj/  
Xbp1/Zbtb16/Vcam1/Il4ra/Rps3/Icam1/Tgfbr2/Nfkbiz/Il6ra/Pnp/Cd81/Il2rg/Cd47/Rhoa/Nck1/Jak3/H2-T23/Rara/  
Hif1a/Ptgs2/Hspb1/Rhoj/Nfe2l2/Anxa1/Gata2/Hmox1/Pik3c2a/Map2k3/Egfr1/Nus1  
Acer2/Ccn1/Serinc3/Plpp1/A4galt/Sptlc2/Ugcg/Cln6/Kdsr/Spns2/Psap/St6galnac6/Elovl5/Degs2/Smpdl3a/Hacd4/

Jfkbiz/Bcr/Pglyrp1/Nr1d1/Il17ra/Pla2g4a/Cebpb/Cd81/Per1/Fabp4/Cd47/Ndufc2/Aoc3/Wnt5a/Sod1/H2-T23/  
rg/Cd47/Rhoa/Nck1/Jak3/H2-T23/Rara/Egr3/Pawr/H2-Ab1/Zmiz1/Tnip1/Anxa1/Cd74/Ndfip1/Nrarp/Peli1/Bcl  
/Hipk1/Casp4/Ugcg/Wnt5a/Jak3/Txndc17/Csf1/Il3ra/Crlf2/Cd74/Jak1/Tnfrsf11a/Adipor1/Sigirr/Il6st/Cd24a/Ir  
'Smad1/Nfe2l2/Acvrl1/Wnt5a/Anxa3/Anxa1/Sash1/Gata2/Adm/Jak1/Itgb1/Hmox1/Grn/Ddah1/Btg1/Emc10/f  
Egr3/Pawr/H2-Ab1/Zmiz1/Anxa1/Cd74/Bcl10/Il6st/Cd24a/Bcl6/Ephb4/H2-Aa/Selenok/Efnb1/Socs5/Cd59b/Iti

'Bst1/Tnip1/Anxa1/Vamp8/Ndfip1/Pmp22/Tnfrsf11a/Mgll/Apod/Tnfrsf1b/Trpv4/Grn/Calcr1/Cd24a/Ace/Rb1/E  
10/Itgb1/Il6st/Dusp3/Lrrc32/Cd24a/Bcl6/Ephb4/H2-Aa/Hfe/Selenok/Efnb1/Socs5/Cd59b/Itga5/Itgb2/Prdx2

3cl6/Hyal2/Fcer1g/Sharpin/Chid1/Nupr1/Socs5/Abcc1/Cd59b/Snx4/Ednrb/Cdh5/Wfdc1
